# Supplementary material for: Novel Transcriptomic Interactomes of Noncoding RNAs in the Heart under Altered Thyroid Hormonal States
Source: Int J Mol Sci. 2023 Mar 31;24(7):6560. doi: 10.3390/ijms24076560 (PMC10095585; doi:10.3390/ijms24076560)
Supplement: Supplementary file 1 [file ijms-24-06560-s001.zip]

Archive with 22 entries (22 files):
- Supplemental File S14 lncRNA miRNA mRNA interactions.xlsx
- Supplemental File S15 lncRNA-mRNA.co-expression.cis_interaction.xlsx
- Supplemental File S16 lncRNA-mRNA.co-expression.trans_interaction.xlsx
- Supplemental File S17 LncRNA Targets PPI.xlsx
- Supplemental File S18 miRNA interacting Partners of Differentially Expressed circRNAs.xlsx
- Supplemental File S19 miRNA mRNA Network KEGG Analysis.xlsx
- Supplemental File S20 miRNA mRNA Network Analysis.xlsx
- Supplemental File S21 Differentially Expressed mRNA associated Protein Protein Interactions.xlsx
- Supplementary Methods and Results.pdf
- Supplemental File S1 Novel lncRNA.xlsx
- Supplemental File S2 LncRNA GO Enrichment Analysis.xlsx
- Supplemental File S3 lncRNA KEGG Enrichment Analysis.xlsx
- Supplemental File S4 LncRNA_AllGroups_AlternativeSplicing.xlsx
- Supplemental File S5 Differentially Expressed circRNA Details_Alternative Backsplicing.xlsx
- Supplemental File S6 CircRNA KEGG enrichment.xlsx
- Supplemental File S7 DEA miRNA.xlsx
- Supplemental File S8 miRNA GO enrichment all groupwise comparisons.xlsx
- Supplemental File S9 miRNA KEGG enrichment all GroupWise comparisons.xlsx
- Supplemental File S10 Novel mRNA.xlsx
- Supplemental File S11 DEA mRNA.xlsx
- Supplemental File S12 mRNA_KEGG_Enrichment_AllGroups_Significant.xlsx
- Supplemental File S13 LncRNA miRNA Interaction.xlsx
