# Supplementary material for: Novel Transcriptomic Interactomes of Noncoding RNAs in the Heart under Altered Thyroid Hormonal States
Source: Int J Mol Sci. 2023 Mar 31;24(7):6560. doi: 10.3390/ijms24076560 (PMC10095585; doi:10.3390/ijms24076560)
Supplement: Supplementary file 1 [file ijms-24-06560-s001.zip › Supplemental File S1 Novel lncRNA.xlsx]

## Sheet: Supplemental File 1 Novel lncRN
Sequence	Source		Feature	Start		End		Score	Strand	Frame	Attributes
NC_000067.7	Novogene	exon	11093427	11099951	.	+	.	nearest_ref "XM_006495441.5"; exon_number "1"; gene_id "109294"; transcript_name "TCONS_00000023"; gene_biotype "protein_coding"; class_code "i"; transcript_id "TCONS_00000023"; gene_name "Prex2"; transcript_biotype "sense_intronic"
NC_000067.7	Novogene	exon	11102931	11103295	.	+	.	nearest_ref "XM_006495441.5"; exon_number "2"; gene_id "109294"; transcript_name "TCONS_00000023"; gene_biotype "protein_coding"; class_code "i"; transcript_id "TCONS_00000023"; gene_name "Prex2"; transcript_biotype "sense_intronic"
NC_000067.7	Novogene	exon	58752445	58752818	.	+	.	nearest_ref "XM_011238420.4"; exon_number "1"; gene_id "12633"; transcript_name "TCONS_00000170"; gene_biotype "protein_coding"; class_code "j"; transcript_id "TCONS_00000170"; gene_name "Cflar"; transcript_biotype "others"
NC_000067.7	Novogene	exon	58761488	58763708	.	+	.	nearest_ref "XM_011238420.4"; exon_number "2"; gene_id "12633"; transcript_name "TCONS_00000170"; gene_biotype "protein_coding"; class_code "j"; transcript_id "TCONS_00000170"; gene_name "Cflar"; transcript_biotype "others"
NC_000067.7	Novogene	exon	61860317	61863615	.	+	.	nearest_ref "XR_373443.4"; exon_number "1"; gene_id "74661"; transcript_name "TCONS_00000196"; gene_biotype "lncRNA"; class_code "x"; transcript_id "TCONS_00000196"; gene_name "Pard3bos1"; transcript_biotype "antisense"
NC_000067.7	Novogene	exon	61863724	61863839	.	+	.	nearest_ref "XR_373443.4"; exon_number "2"; gene_id "74661"; transcript_name "TCONS_00000196"; gene_biotype "lncRNA"; class_code "x"; transcript_id "TCONS_00000196"; gene_name "Pard3bos1"; transcript_biotype "antisense"
NC_000067.7	Novogene	exon	63144832	63144918	.	+	.	nearest_ref "NR_045914.1"; exon_number "1"; gene_id "100380944"; transcript_name "TCONS_00000200"; gene_biotype "lncRNA"; class_code "o"; transcript_id "TCONS_00000200"; gene_name "Ino80dos"; transcript_biotype "sense_overlapping"
NC_000067.7	Novogene	exon	63152973	63168872	.	+	.	nearest_ref "NR_045914.1"; exon_number "2"; gene_id "100380944"; transcript_name "TCONS_00000200"; gene_biotype "lncRNA"; class_code "o"; transcript_id "TCONS_00000200"; gene_name "Ino80dos"; transcript_biotype "sense_overlapping"
NC_000067.7	Novogene	exon	72976019	72976141	.	+	.	nearest_ref "XR_001778985.3"; exon_number "1"; gene_id "102633145"; transcript_name "TCONS_00000224"; gene_biotype "lncRNA"; class_code "j"; transcript_id "TCONS_00000224"; gene_name "Gm31047"; transcript_biotype "lincRNA"
NC_000067.7	Novogene	exon	72976236	72976336	.	+	.	nearest_ref "XR_001778985.3"; exon_number "2"; gene_id "102633145"; transcript_name "TCONS_00000224"; gene_biotype "lncRNA"; class_code "j"; transcript_id "TCONS_00000224"; gene_name "Gm31047"; transcript_biotype "lincRNA"
NC_000067.7	Novogene	exon	72976515	72976652	.	+	.	nearest_ref "XR_001778985.3"; exon_number "3"; gene_id "102633145"; transcript_name "TCONS_00000224"; gene_biotype "lncRNA"; class_code "j"; transcript_id "TCONS_00000224"; gene_name "Gm31047"; transcript_biotype "lincRNA"
NC_000067.7	Novogene	exon	72980843	72980977	.	+	.	nearest_ref "XR_001778985.3"; exon_number "4"; gene_id "102633145"; transcript_name "TCONS_00000224"; gene_biotype "lncRNA"; class_code "j"; transcript_id "TCONS_00000224"; gene_name "Gm31047"; transcript_biotype "lincRNA"
NC_000067.7	Novogene	exon	72981913	72982050	.	+	.	nearest_ref "XR_001778985.3"; exon_number "5"; gene_id "102633145"; transcript_name "TCONS_00000224"; gene_biotype "lncRNA"; class_code "j"; transcript_id "TCONS_00000224"; gene_name "Gm31047"; transcript_biotype "lincRNA"
NC_000067.7	Novogene	exon	72987548	72987720	.	+	.	nearest_ref "XR_001778985.3"; exon_number "6"; gene_id "102633145"; transcript_name "TCONS_00000224"; gene_biotype "lncRNA"; class_code "j"; transcript_id "TCONS_00000224"; gene_name "Gm31047"; transcript_biotype "lincRNA"
NC_000067.7	Novogene	exon	72989234	72991903	.	+	.	nearest_ref "XR_001778985.3"; exon_number "7"; gene_id "102633145"; transcript_name "TCONS_00000224"; gene_biotype "lncRNA"; class_code "j"; transcript_id "TCONS_00000224"; gene_name "Gm31047"; transcript_biotype "lincRNA"
NC_000067.7	Novogene	exon	72976019	72976141	.	+	.	nearest_ref "XR_001778985.3"; exon_number "1"; gene_id "102633145"; transcript_name "TCONS_00000223"; gene_biotype "lncRNA"; class_code "j"; transcript_id "TCONS_00000223"; gene_name "Gm31047"; transcript_biotype "lincRNA"
NC_000067.7	Novogene	exon	72976236	72976336	.	+	.	nearest_ref "XR_001778985.3"; exon_number "2"; gene_id "102633145"; transcript_name "TCONS_00000223"; gene_biotype "lncRNA"; class_code "j"; transcript_id "TCONS_00000223"; gene_name "Gm31047"; transcript_biotype "lincRNA"
NC_000067.7	Novogene	exon	72976515	72976652	.	+	.	nearest_ref "XR_001778985.3"; exon_number "3"; gene_id "102633145"; transcript_name "TCONS_00000223"; gene_biotype "lncRNA"; class_code "j"; transcript_id "TCONS_00000223"; gene_name "Gm31047"; transcript_biotype "lincRNA"
NC_000067.7	Novogene	exon	72979655	72979699	.	+	.	nearest_ref "XR_001778985.3"; exon_number "4"; gene_id "102633145"; transcript_name "TCONS_00000223"; gene_biotype "lncRNA"; class_code "j"; transcript_id "TCONS_00000223"; gene_name "Gm31047"; transcript_biotype "lincRNA"
NC_000067.7	Novogene	exon	72980843	72980977	.	+	.	nearest_ref "XR_001778985.3"; exon_number "5"; gene_id "102633145"; transcript_name "TCONS_00000223"; gene_biotype "lncRNA"; class_code "j"; transcript_id "TCONS_00000223"; gene_name "Gm31047"; transcript_biotype "lincRNA"
NC_000067.7	Novogene	exon	72981913	72982050	.	+	.	nearest_ref "XR_001778985.3"; exon_number "6"; gene_id "102633145"; transcript_name "TCONS_00000223"; gene_biotype "lncRNA"; class_code "j"; transcript_id "TCONS_00000223"; gene_name "Gm31047"; transcript_biotype "lincRNA"
NC_000067.7	Novogene	exon	72987548	72987720	.	+	.	nearest_ref "XR_001778985.3"; exon_number "7"; gene_id "102633145"; transcript_name "TCONS_00000223"; gene_biotype "lncRNA"; class_code "j"; transcript_id "TCONS_00000223"; gene_name "Gm31047"; transcript_biotype "lincRNA"
NC_000067.7	Novogene	exon	72989234	72991903	.	+	.	nearest_ref "XR_001778985.3"; exon_number "8"; gene_id "102633145"; transcript_name "TCONS_00000223"; gene_biotype "lncRNA"; class_code "j"; transcript_id "TCONS_00000223"; gene_name "Gm31047"; transcript_biotype "lincRNA"
NC_000067.7	Novogene	exon	92307383	92307544	.	+	.	nearest_ref "XR_387274.2"; exon_number "1"; gene_id "102639756"; transcript_name "TCONS_00000353"; gene_biotype "lncRNA"; class_code "j"; transcript_id "TCONS_00000353"; gene_name "Gm35992"; transcript_biotype "lincRNA"
NC_000067.7	Novogene	exon	92308333	92312761	.	+	.	nearest_ref "XR_387274.2"; exon_number "2"; gene_id "102639756"; transcript_name "TCONS_00000353"; gene_biotype "lncRNA"; class_code "j"; transcript_id "TCONS_00000353"; gene_name "Gm35992"; transcript_biotype "lincRNA"
NC_000067.7	Novogene	exon	93782623	93783661	.	+	.	nearest_ref "NM_199366.4"; exon_number "1"; gene_id "381334"; transcript_name "TCONS_00000375"; gene_biotype "protein_coding"; class_code "o"; transcript_id "TCONS_00000375"; gene_name "Gal3st2"; transcript_biotype "sense_overlapping"
NC_000067.7	Novogene	exon	93850472	93850660	.	+	.	nearest_ref "NM_199366.4"; exon_number "2"; gene_id "381334"; transcript_name "TCONS_00000375"; gene_biotype "protein_coding"; class_code "o"; transcript_id "TCONS_00000375"; gene_name "Gal3st2"; transcript_biotype "sense_overlapping"
NC_000067.7	Novogene	exon	120690512	120690674	.	+	.	nearest_ref "XR_001779380.1"; exon_number "1"; gene_id "69904"; transcript_name "TCONS_00000424"; gene_biotype "lncRNA"; class_code "j"; transcript_id "TCONS_00000424"; gene_name "2610027F03Rik"; transcript_biotype "lincRNA"
NC_000067.7	Novogene	exon	120691091	120691250	.	+	.	nearest_ref "XR_001779380.1"; exon_number "2"; gene_id "69904"; transcript_name "TCONS_00000424"; gene_biotype "lncRNA"; class_code "j"; transcript_id "TCONS_00000424"; gene_name "2610027F03Rik"; transcript_biotype "lincRNA"
NC_000067.7	Novogene	exon	155395974	155397483	.	+	.	nearest_ref "NR_132128.1"; exon_number "1"; gene_id "433367"; transcript_name "TCONS_00000569"; gene_biotype "lncRNA"; class_code "x"; transcript_id "TCONS_00000569"; gene_name "Gm5532"; transcript_biotype "antisense"
NC_000067.7	Novogene	exon	155402772	155402937	.	+	.	nearest_ref "NR_132128.1"; exon_number "2"; gene_id "433367"; transcript_name "TCONS_00000569"; gene_biotype "lncRNA"; class_code "x"; transcript_id "TCONS_00000569"; gene_name "Gm5532"; transcript_biotype "antisense"
NC_000067.7	Novogene	exon	179548827	179549221	.	+	.	nearest_ref "NM_001370897.1"; exon_number "1"; gene_id "383592"; transcript_name "TCONS_00000681"; gene_biotype "protein_coding"; class_code "x"; transcript_id "TCONS_00000681"; gene_name "Kif28"; transcript_biotype "antisense"
NC_000067.7	Novogene	exon	179557026	179558567	.	+	.	nearest_ref "NM_001370897.1"; exon_number "2"; gene_id "383592"; transcript_name "TCONS_00000681"; gene_biotype "protein_coding"; class_code "x"; transcript_id "TCONS_00000681"; gene_name "Kif28"; transcript_biotype "antisense"
NC_000067.7	Novogene	exon	186319519	186319743	.	+	.	nearest_ref "NR_168305.1"; exon_number "1"; gene_id "102639175"; transcript_name "TCONS_00000730"; gene_biotype "lncRNA"; class_code "j"; transcript_id "TCONS_00000730"; gene_name "Gm35546"; transcript_biotype "lincRNA"
NC_000067.7	Novogene	exon	186321195	186321784	.	+	.	nearest_ref "NR_168305.1"; exon_number "2"; gene_id "102639175"; transcript_name "TCONS_00000730"; gene_biotype "lncRNA"; class_code "j"; transcript_id "TCONS_00000730"; gene_name "Gm35546"; transcript_biotype "lincRNA"
NC_000067.7	Novogene	exon	186322002	186322155	.	+	.	nearest_ref "NR_168305.1"; exon_number "3"; gene_id "102639175"; transcript_name "TCONS_00000730"; gene_biotype "lncRNA"; class_code "j"; transcript_id "TCONS_00000730"; gene_name "Gm35546"; transcript_biotype "lincRNA"
NC_000067.7	Novogene	exon	186345270	186346706	.	+	.	nearest_ref "NR_168305.1"; exon_number "4"; gene_id "102639175"; transcript_name "TCONS_00000730"; gene_biotype "lncRNA"; class_code "j"; transcript_id "TCONS_00000730"; gene_name "Gm35546"; transcript_biotype "lincRNA"
NC_000067.7	Novogene	exon	192955585	192955736	.	+	.	exon_number "1"; gene_id "XLOC_000433"; transcript_name "TCONS_00000758"; gene_biotype "novel"; class_code "u"; transcript_id "TCONS_00000758"; gene_name "XLOC_000433"; transcript_biotype "lincRNA"
NC_000067.7	Novogene	exon	192962274	192962324	.	+	.	exon_number "2"; gene_id "XLOC_000433"; transcript_name "TCONS_00000758"; gene_biotype "novel"; class_code "u"; transcript_id "TCONS_00000758"; gene_name "XLOC_000433"; transcript_biotype "lincRNA"
NC_000067.7	Novogene	exon	192962531	192962583	.	+	.	exon_number "3"; gene_id "XLOC_000433"; transcript_name "TCONS_00000758"; gene_biotype "novel"; class_code "u"; transcript_id "TCONS_00000758"; gene_name "XLOC_000433"; transcript_biotype "lincRNA"
NC_000067.7	Novogene	exon	192962679	192963498	.	+	.	exon_number "4"; gene_id "XLOC_000433"; transcript_name "TCONS_00000758"; gene_biotype "novel"; class_code "u"; transcript_id "TCONS_00000758"; gene_name "XLOC_000433"; transcript_biotype "lincRNA"
NC_000067.7	Novogene	exon	194671289	194672411	.	+	.	nearest_ref "NR_015566.2"; exon_number "1"; gene_id "320977"; transcript_name "TCONS_00000769"; gene_biotype "lncRNA"; class_code "o"; transcript_id "TCONS_00000769"; gene_name "A330023F24Rik"; transcript_biotype "sense_overlapping"
NC_000067.7	Novogene	exon	194672438	194687152	.	+	.	nearest_ref "NR_015566.2"; exon_number "2"; gene_id "320977"; transcript_name "TCONS_00000769"; gene_biotype "lncRNA"; class_code "o"; transcript_id "TCONS_00000769"; gene_name "A330023F24Rik"; transcript_biotype "sense_overlapping"
NC_000067.7	Novogene	exon	194704246	194712294	.	+	.	nearest_ref "NR_015566.2"; exon_number "3"; gene_id "320977"; transcript_name "TCONS_00000769"; gene_biotype "lncRNA"; class_code "o"; transcript_id "TCONS_00000769"; gene_name "A330023F24Rik"; transcript_biotype "sense_overlapping"
NC_000067.7	Novogene	exon	74039626	74039927	.	-	.	nearest_ref "XM_006495871.4"; exon_number "1"; gene_id "21961"; transcript_name "TCONS_00001038"; gene_biotype "protein_coding"; class_code "j"; transcript_id "TCONS_00001038"; gene_name "Tns1"; transcript_biotype "others"
NC_000067.7	Novogene	exon	74039963	74041496	.	-	.	nearest_ref "XM_006495871.4"; exon_number "2"; gene_id "21961"; transcript_name "TCONS_00001038"; gene_biotype "protein_coding"; class_code "j"; transcript_id "TCONS_00001038"; gene_name "Tns1"; transcript_biotype "others"
NC_000067.7	Novogene	exon	74042676	74042717	.	-	.	nearest_ref "XM_006495871.4"; exon_number "3"; gene_id "21961"; transcript_name "TCONS_00001038"; gene_biotype "protein_coding"; class_code "j"; transcript_id "TCONS_00001038"; gene_name "Tns1"; transcript_biotype "others"
NC_000067.7	Novogene	exon	74055304	74055345	.	-	.	nearest_ref "XM_006495871.4"; exon_number "4"; gene_id "21961"; transcript_name "TCONS_00001038"; gene_biotype "protein_coding"; class_code "j"; transcript_id "TCONS_00001038"; gene_name "Tns1"; transcript_biotype "others"
NC_000067.7	Novogene	exon	74107768	74107805	.	-	.	nearest_ref "XM_006495871.4"; exon_number "5"; gene_id "21961"; transcript_name "TCONS_00001038"; gene_biotype "protein_coding"; class_code "j"; transcript_id "TCONS_00001038"; gene_name "Tns1"; transcript_biotype "others"
NC_000067.7	Novogene	exon	74107975	74108132	.	-	.	nearest_ref "XM_006495871.4"; exon_number "6"; gene_id "21961"; transcript_name "TCONS_00001038"; gene_biotype "protein_coding"; class_code "j"; transcript_id "TCONS_00001038"; gene_name "Tns1"; transcript_biotype "others"
NC_000067.7	Novogene	exon	85684931	85686062	.	-	.	exon_number "1"; gene_id "XLOC_000611"; transcript_name "TCONS_00001097"; gene_biotype "novel"; class_code "u"; transcript_id "TCONS_00001097"; gene_name "XLOC_000611"; transcript_biotype "lincRNA"
NC_000067.7	Novogene	exon	85686432	85686469	.	-	.	exon_number "2"; gene_id "XLOC_000611"; transcript_name "TCONS_00001097"; gene_biotype "novel"; class_code "u"; transcript_id "TCONS_00001097"; gene_name "XLOC_000611"; transcript_biotype "lincRNA"
NC_000067.7	Novogene	exon	95758454	95759352	.	-	.	nearest_ref "XR_004936885.1"; exon_number "1"; gene_id "115487703"; transcript_name "TCONS_00001152"; gene_biotype "snRNA"; class_code "o"; transcript_id "TCONS_00001152"; gene_name "Gm22360"; transcript_biotype "sense_overlapping"
NC_000067.7	Novogene	exon	95759382	95759854	.	-	.	nearest_ref "XR_004936885.1"; exon_number "2"; gene_id "115487703"; transcript_name "TCONS_00001152"; gene_biotype "snRNA"; class_code "o"; transcript_id "TCONS_00001152"; gene_name "Gm22360"; transcript_biotype "sense_overlapping"
NC_000067.7	Novogene	exon	151174308	151174713	.	-	.	exon_number "1"; gene_id "XLOC_000733"; transcript_name "TCONS_00001329"; gene_biotype "novel"; class_code "u"; transcript_id "TCONS_00001329"; gene_name "XLOC_000733"; transcript_biotype "lincRNA"
NC_000067.7	Novogene	exon	151219693	151220107	.	-	.	exon_number "2"; gene_id "XLOC_000733"; transcript_name "TCONS_00001329"; gene_biotype "novel"; class_code "u"; transcript_id "TCONS_00001329"; gene_name "XLOC_000733"; transcript_biotype "lincRNA"
NC_000067.7	Novogene	exon	155395919	155397483	.	-	.	nearest_ref "NR_132128.1"; exon_number "1"; gene_id "433367"; transcript_name "TCONS_00001355"; gene_biotype "lncRNA"; class_code "j"; transcript_id "TCONS_00001355"; gene_name "Gm5532"; transcript_biotype "lincRNA"
NC_000067.7	Novogene	exon	155402772	155402857	.	-	.	nearest_ref "NR_132128.1"; exon_number "2"; gene_id "433367"; transcript_name "TCONS_00001355"; gene_biotype "lncRNA"; class_code "j"; transcript_id "TCONS_00001355"; gene_name "Gm5532"; transcript_biotype "lincRNA"
NC_000068.8	Novogene	exon	20973685	20974092	.	+	.	nearest_ref "NR_033225.1"; exon_number "1"; gene_id "433408"; transcript_name "TCONS_00001678"; gene_biotype "lncRNA"; class_code "j"; transcript_id "TCONS_00001678"; gene_name "Gm13375"; transcript_biotype "lincRNA"
NC_000068.8	Novogene	exon	20974285	20975159	.	+	.	nearest_ref "NR_033225.1"; exon_number "2"; gene_id "433408"; transcript_name "TCONS_00001678"; gene_biotype "lncRNA"; class_code "j"; transcript_id "TCONS_00001678"; gene_name "Gm13375"; transcript_biotype "lincRNA"
NC_000068.8	Novogene	exon	31561651	31561855	.	+	.	nearest_ref "NM_001283046.1"; exon_number "1"; gene_id "11350"; transcript_name "TCONS_00001832"; gene_biotype "protein_coding"; class_code "o"; transcript_id "TCONS_00001832"; gene_name "Abl1"; transcript_biotype "sense_overlapping"
NC_000068.8	Novogene	exon	31597344	31603565	.	+	.	nearest_ref "NM_001283046.1"; exon_number "2"; gene_id "11350"; transcript_name "TCONS_00001832"; gene_biotype "protein_coding"; class_code "o"; transcript_id "TCONS_00001832"; gene_name "Abl1"; transcript_biotype "sense_overlapping"
NC_000068.8	Novogene	exon	50371462	50371593	.	+	.	exon_number "1"; gene_id "XLOC_001068"; transcript_name "TCONS_00001901"; gene_biotype "novel"; class_code "u"; transcript_id "TCONS_00001901"; gene_name "XLOC_001068"; transcript_biotype "lincRNA"
NC_000068.8	Novogene	exon	50372247	50372609	.	+	.	exon_number "2"; gene_id "XLOC_001068"; transcript_name "TCONS_00001901"; gene_biotype "novel"; class_code "u"; transcript_id "TCONS_00001901"; gene_name "XLOC_001068"; transcript_biotype "lincRNA"
NC_000068.8	Novogene	exon	64875479	64875582	.	+	.	exon_number "1"; gene_id "XLOC_001084"; transcript_name "TCONS_00001940"; gene_biotype "novel"; class_code "u"; transcript_id "TCONS_00001940"; gene_name "XLOC_001084"; transcript_biotype "lincRNA"
NC_000068.8	Novogene	exon	64883458	64883692	.	+	.	exon_number "2"; gene_id "XLOC_001084"; transcript_name "TCONS_00001940"; gene_biotype "novel"; class_code "u"; transcript_id "TCONS_00001940"; gene_name "XLOC_001084"; transcript_biotype "lincRNA"
NC_000068.8	Novogene	exon	92859541	92859992	.	+	.	nearest_ref "NR_110333.1"; exon_number "1"; gene_id "433456"; transcript_name "TCONS_00002139"; gene_biotype "lncRNA"; class_code "j"; transcript_id "TCONS_00002139"; gene_name "4631405J19Rik"; transcript_biotype "lincRNA"
NC_000068.8	Novogene	exon	92860483	92861300	.	+	.	nearest_ref "NR_110333.1"; exon_number "2"; gene_id "433456"; transcript_name "TCONS_00002139"; gene_biotype "lncRNA"; class_code "j"; transcript_id "TCONS_00002139"; gene_name "4631405J19Rik"; transcript_biotype "lincRNA"
NC_000068.8	Novogene	exon	92861811	92862026	.	+	.	nearest_ref "NR_110333.1"; exon_number "3"; gene_id "433456"; transcript_name "TCONS_00002139"; gene_biotype "lncRNA"; class_code "j"; transcript_id "TCONS_00002139"; gene_name "4631405J19Rik"; transcript_biotype "lincRNA"
NC_000068.8	Novogene	exon	92863355	92863883	.	+	.	nearest_ref "NR_110333.1"; exon_number "4"; gene_id "433456"; transcript_name "TCONS_00002139"; gene_biotype "lncRNA"; class_code "j"; transcript_id "TCONS_00002139"; gene_name "4631405J19Rik"; transcript_biotype "lincRNA"
NC_000068.8	Novogene	exon	92860382	92860904	.	+	.	nearest_ref "NR_110333.1"; exon_number "1"; gene_id "433456"; transcript_name "TCONS_00002140"; gene_biotype "lncRNA"; class_code "j"; transcript_id "TCONS_00002140"; gene_name "4631405J19Rik"; transcript_biotype "lincRNA"
NC_000068.8	Novogene	exon	92861811	92862026	.	+	.	nearest_ref "NR_110333.1"; exon_number "2"; gene_id "433456"; transcript_name "TCONS_00002140"; gene_biotype "lncRNA"; class_code "j"; transcript_id "TCONS_00002140"; gene_name "4631405J19Rik"; transcript_biotype "lincRNA"
NC_000068.8	Novogene	exon	92863355	92863962	.	+	.	nearest_ref "NR_110333.1"; exon_number "3"; gene_id "433456"; transcript_name "TCONS_00002140"; gene_biotype "lncRNA"; class_code "j"; transcript_id "TCONS_00002140"; gene_name "4631405J19Rik"; transcript_biotype "lincRNA"
NC_000068.8	Novogene	exon	119422615	119424915	.	+	.	nearest_ref "NR_015473.1"; exon_number "1"; gene_id "66602"; transcript_name "TCONS_00002215"; gene_biotype "lncRNA"; class_code "j"; transcript_id "TCONS_00002215"; gene_name "Oip5os1"; transcript_biotype "lincRNA"
NC_000068.8	Novogene	exon	119426740	119426992	.	+	.	nearest_ref "NR_015473.1"; exon_number "2"; gene_id "66602"; transcript_name "TCONS_00002215"; gene_biotype "lncRNA"; class_code "j"; transcript_id "TCONS_00002215"; gene_name "Oip5os1"; transcript_biotype "lincRNA"
NC_000068.8	Novogene	exon	119430069	119432333	.	+	.	nearest_ref "NR_015473.1"; exon_number "3"; gene_id "66602"; transcript_name "TCONS_00002215"; gene_biotype "lncRNA"; class_code "j"; transcript_id "TCONS_00002215"; gene_name "Oip5os1"; transcript_biotype "lincRNA"
NC_000068.8	Novogene	exon	119432356	119437974	.	+	.	nearest_ref "NR_015473.1"; exon_number "4"; gene_id "66602"; transcript_name "TCONS_00002215"; gene_biotype "lncRNA"; class_code "j"; transcript_id "TCONS_00002215"; gene_name "Oip5os1"; transcript_biotype "lincRNA"
NC_000068.8	Novogene	exon	119424777	119425075	.	+	.	nearest_ref "NR_015473.1"; exon_number "1"; gene_id "66602"; transcript_name "TCONS_00002217"; gene_biotype "lncRNA"; class_code "j"; transcript_id "TCONS_00002217"; gene_name "Oip5os1"; transcript_biotype "lincRNA"
NC_000068.8	Novogene	exon	119426740	119437971	.	+	.	nearest_ref "NR_015473.1"; exon_number "2"; gene_id "66602"; transcript_name "TCONS_00002217"; gene_biotype "lncRNA"; class_code "j"; transcript_id "TCONS_00002217"; gene_name "Oip5os1"; transcript_biotype "lincRNA"
NC_000068.8	Novogene	exon	119424803	119425897	.	+	.	nearest_ref "NR_015473.1"; exon_number "1"; gene_id "66602"; transcript_name "TCONS_00002218"; gene_biotype "lncRNA"; class_code "j"; transcript_id "TCONS_00002218"; gene_name "Oip5os1"; transcript_biotype "lincRNA"
NC_000068.8	Novogene	exon	119426740	119437974	.	+	.	nearest_ref "NR_015473.1"; exon_number "2"; gene_id "66602"; transcript_name "TCONS_00002218"; gene_biotype "lncRNA"; class_code "j"; transcript_id "TCONS_00002218"; gene_name "Oip5os1"; transcript_biotype "lincRNA"
NC_000068.8	Novogene	exon	135501467	135501650	.	+	.	nearest_ref "XM_011239357.4"; exon_number "1"; gene_id "18798"; transcript_name "TCONS_00002351"; gene_biotype "protein_coding"; class_code "j"; transcript_id "TCONS_00002351"; gene_name "Plcb4"; transcript_biotype "others"
NC_000068.8	Novogene	exon	135583750	135583807	.	+	.	nearest_ref "XM_011239357.4"; exon_number "2"; gene_id "18798"; transcript_name "TCONS_00002351"; gene_biotype "protein_coding"; class_code "j"; transcript_id "TCONS_00002351"; gene_name "Plcb4"; transcript_biotype "others"
NC_000068.8	Novogene	exon	135623369	135630225	.	+	.	nearest_ref "XM_011239357.4"; exon_number "3"; gene_id "18798"; transcript_name "TCONS_00002351"; gene_biotype "protein_coding"; class_code "j"; transcript_id "TCONS_00002351"; gene_name "Plcb4"; transcript_biotype "others"
NC_000068.8	Novogene	exon	156229600	156234969	.	+	.	nearest_ref "XM_006498711.5"; exon_number "1"; gene_id "13821"; transcript_name "TCONS_00002484"; gene_biotype "protein_coding"; class_code "j"; transcript_id "TCONS_00002484"; gene_name "Epb41l1"; transcript_biotype "others"
NC_000068.8	Novogene	exon	156280505	156280889	.	+	.	nearest_ref "XM_006498711.5"; exon_number "2"; gene_id "13821"; transcript_name "TCONS_00002484"; gene_biotype "protein_coding"; class_code "j"; transcript_id "TCONS_00002484"; gene_name "Epb41l1"; transcript_biotype "others"
NC_000068.8	Novogene	exon	174928629	174928692	.	+	.	nearest_ref "XR_004940807.1"; exon_number "1"; gene_id "115489542"; transcript_name "TCONS_00002606"; gene_biotype "lncRNA"; class_code "j"; transcript_id "TCONS_00002606"; gene_name "LOC115489542"; transcript_biotype "lincRNA"
NC_000068.8	Novogene	exon	174931905	174932348	.	+	.	nearest_ref "XR_004940807.1"; exon_number "2"; gene_id "115489542"; transcript_name "TCONS_00002606"; gene_biotype "lncRNA"; class_code "j"; transcript_id "TCONS_00002606"; gene_name "LOC115489542"; transcript_biotype "lincRNA"
NC_000068.8	Novogene	exon	175320014	175320185	.	+	.	nearest_ref "NM_001242944.1"; exon_number "1"; gene_id "100503949"; transcript_name "TCONS_00002610"; gene_biotype "protein_coding"; class_code "j"; transcript_id "TCONS_00002610"; gene_name "Zfp965"; transcript_biotype "others"
NC_000068.8	Novogene	exon	175324165	175324809	.	+	.	nearest_ref "NM_001242944.1"; exon_number "2"; gene_id "100503949"; transcript_name "TCONS_00002610"; gene_biotype "protein_coding"; class_code "j"; transcript_id "TCONS_00002610"; gene_name "Zfp965"; transcript_biotype "others"
NC_000068.8	Novogene	exon	181221142	181221445	.	+	.	nearest_ref "NR_027290.1"; exon_number "1"; gene_id "100271841"; transcript_name "TCONS_00002685"; gene_biotype "lncRNA"; class_code "j"; transcript_id "TCONS_00002685"; gene_name "Uckl1os"; transcript_biotype "lincRNA"
NC_000068.8	Novogene	exon	181222058	181224702	.	+	.	nearest_ref "NR_027290.1"; exon_number "2"; gene_id "100271841"; transcript_name "TCONS_00002685"; gene_biotype "lncRNA"; class_code "j"; transcript_id "TCONS_00002685"; gene_name "Uckl1os"; transcript_biotype "lincRNA"
NC_000068.8	Novogene	exon	6850935	6854166	.	-	.	nearest_ref "XM_036158239.1"; exon_number "1"; gene_id "14007"; transcript_name "TCONS_00002709"; gene_biotype "protein_coding"; class_code "j"; transcript_id "TCONS_00002709"; gene_name "Celf2"; transcript_biotype "others"
NC_000068.8	Novogene	exon	6967190	6967225	.	-	.	nearest_ref "XM_036158239.1"; exon_number "2"; gene_id "14007"; transcript_name "TCONS_00002709"; gene_biotype "protein_coding"; class_code "j"; transcript_id "TCONS_00002709"; gene_name "Celf2"; transcript_biotype "others"
NC_000068.8	Novogene	exon	7087595	7087730	.	-	.	nearest_ref "XM_036158239.1"; exon_number "3"; gene_id "14007"; transcript_name "TCONS_00002709"; gene_biotype "protein_coding"; class_code "j"; transcript_id "TCONS_00002709"; gene_name "Celf2"; transcript_biotype "others"
NC_000068.8	Novogene	exon	18387696	18389301	.	-	.	nearest_ref "XR_865923.4"; exon_number "1"; gene_id "13418"; transcript_name "TCONS_00002748"; gene_biotype "protein_coding"; class_code "i"; transcript_id "TCONS_00002748"; gene_name "Dnajc1"; transcript_biotype "sense_intronic"
NC_000068.8	Novogene	exon	18392040	18395673	.	-	.	nearest_ref "XR_865923.4"; exon_number "2"; gene_id "13418"; transcript_name "TCONS_00002748"; gene_biotype "protein_coding"; class_code "i"; transcript_id "TCONS_00002748"; gene_name "Dnajc1"; transcript_biotype "sense_intronic"
NC_000068.8	Novogene	exon	18387702	18389303	.	-	.	nearest_ref "XR_865923.4"; exon_number "1"; gene_id "13418"; transcript_name "TCONS_00002749"; gene_biotype "protein_coding"; class_code "i"; transcript_id "TCONS_00002749"; gene_name "Dnajc1"; transcript_biotype "sense_intronic"
NC_000068.8	Novogene	exon	18392030	18394053	.	-	.	nearest_ref "XR_865923.4"; exon_number "2"; gene_id "13418"; transcript_name "TCONS_00002749"; gene_biotype "protein_coding"; class_code "i"; transcript_id "TCONS_00002749"; gene_name "Dnajc1"; transcript_biotype "sense_intronic"
NC_000068.8	Novogene	exon	22894756	22899837	.	-	.	nearest_ref "XR_003953771.2"; exon_number "1"; gene_id "115489439"; transcript_name "TCONS_00002770"; gene_biotype "lncRNA"; class_code "x"; transcript_id "TCONS_00002770"; gene_name "Gm52502"; transcript_biotype "antisense"
NC_000068.8	Novogene	exon	22904551	22905452	.	-	.	nearest_ref "XR_003953771.2"; exon_number "2"; gene_id "115489439"; transcript_name "TCONS_00002770"; gene_biotype "lncRNA"; class_code "x"; transcript_id "TCONS_00002770"; gene_name "Gm52502"; transcript_biotype "antisense"
NC_000068.8	Novogene	exon	44993608	44995110	.	-	.	nearest_ref "NM_001355290.1"; exon_number "1"; gene_id "24136"; transcript_name "TCONS_00002971"; gene_biotype "protein_coding"; class_code "i"; transcript_id "TCONS_00002971"; gene_name "Zeb2"; transcript_biotype "sense_intronic"
NC_000068.8	Novogene	exon	44998515	44999894	.	-	.	nearest_ref "NM_001355290.1"; exon_number "2"; gene_id "24136"; transcript_name "TCONS_00002971"; gene_biotype "protein_coding"; class_code "i"; transcript_id "TCONS_00002971"; gene_name "Zeb2"; transcript_biotype "sense_intronic"
NC_000068.8	Novogene	exon	44993623	44996991	.	-	.	nearest_ref "NM_001355290.1"; exon_number "1"; gene_id "24136"; transcript_name "TCONS_00002972"; gene_biotype "protein_coding"; class_code "i"; transcript_id "TCONS_00002972"; gene_name "Zeb2"; transcript_biotype "sense_intronic"
NC_000068.8	Novogene	exon	44997089	44998982	.	-	.	nearest_ref "NM_001355290.1"; exon_number "2"; gene_id "24136"; transcript_name "TCONS_00002972"; gene_biotype "protein_coding"; class_code "i"; transcript_id "TCONS_00002972"; gene_name "Zeb2"; transcript_biotype "sense_intronic"
NC_000068.8	Novogene	exon	48266760	48270730	.	-	.	nearest_ref "NR_166463.1"; exon_number "1"; gene_id "102633236"; transcript_name "TCONS_00002978"; gene_biotype "lncRNA"; class_code "j"; transcript_id "TCONS_00002978"; gene_name "Gm13481"; transcript_biotype "lincRNA"
NC_000068.8	Novogene	exon	48302888	48302986	.	-	.	nearest_ref "NR_166463.1"; exon_number "2"; gene_id "102633236"; transcript_name "TCONS_00002978"; gene_biotype "lncRNA"; class_code "j"; transcript_id "TCONS_00002978"; gene_name "Gm13481"; transcript_biotype "lincRNA"
NC_000068.8	Novogene	exon	48347125	48347426	.	-	.	nearest_ref "NR_166463.1"; exon_number "3"; gene_id "102633236"; transcript_name "TCONS_00002978"; gene_biotype "lncRNA"; class_code "j"; transcript_id "TCONS_00002978"; gene_name "Gm13481"; transcript_biotype "lincRNA"
NC_000068.8	Novogene	exon	60036910	60037307	.	-	.	nearest_ref "XM_030251829.2"; exon_number "1"; gene_id "407823"; transcript_name "TCONS_00003008"; gene_biotype "protein_coding"; class_code "i"; transcript_id "TCONS_00003008"; gene_name "Baz2b"; transcript_biotype "sense_intronic"
NC_000068.8	Novogene	exon	60039366	60040015	.	-	.	nearest_ref "XM_030251829.2"; exon_number "2"; gene_id "407823"; transcript_name "TCONS_00003008"; gene_biotype "protein_coding"; class_code "i"; transcript_id "TCONS_00003008"; gene_name "Baz2b"; transcript_biotype "sense_intronic"
NC_000068.8	Novogene	exon	60654797	60656021	.	-	.	nearest_ref "XM_006499942.3"; exon_number "1"; gene_id "56878"; transcript_name "TCONS_00003016"; gene_biotype "protein_coding"; class_code "o"; transcript_id "TCONS_00003016"; gene_name "Rbms1"; transcript_biotype "sense_overlapping"
NC_000068.8	Novogene	exon	60702384	60702888	.	-	.	nearest_ref "XM_006499942.3"; exon_number "2"; gene_id "56878"; transcript_name "TCONS_00003016"; gene_biotype "protein_coding"; class_code "o"; transcript_id "TCONS_00003016"; gene_name "Rbms1"; transcript_biotype "sense_overlapping"
NC_000068.8	Novogene	exon	104534952	104535546	.	-	.	nearest_ref "XM_006499734.5"; exon_number "1"; gene_id "320554"; transcript_name "TCONS_00003211"; gene_biotype "protein_coding"; class_code "j"; transcript_id "TCONS_00003211"; gene_name "Tcp11l1"; transcript_biotype "others"
NC_000068.8	Novogene	exon	104536701	104536887	.	-	.	nearest_ref "XM_006499734.5"; exon_number "2"; gene_id "320554"; transcript_name "TCONS_00003211"; gene_biotype "protein_coding"; class_code "j"; transcript_id "TCONS_00003211"; gene_name "Tcp11l1"; transcript_biotype "others"
NC_000068.8	Novogene	exon	104542321	104542513	.	-	.	nearest_ref "XM_006499734.5"; exon_number "3"; gene_id "320554"; transcript_name "TCONS_00003211"; gene_biotype "protein_coding"; class_code "j"; transcript_id "TCONS_00003211"; gene_name "Tcp11l1"; transcript_biotype "others"
NC_000068.8	Novogene	exon	106473272	106473495	.	-	.	nearest_ref "NR_137201.1"; exon_number "1"; gene_id "102640562"; transcript_name "TCONS_00003220"; gene_biotype "lncRNA"; class_code "j"; transcript_id "TCONS_00003220"; gene_name "BB218582"; transcript_biotype "lincRNA"
NC_000068.8	Novogene	exon	106473657	106473788	.	-	.	nearest_ref "NR_137201.1"; exon_number "2"; gene_id "102640562"; transcript_name "TCONS_00003220"; gene_biotype "lncRNA"; class_code "j"; transcript_id "TCONS_00003220"; gene_name "BB218582"; transcript_biotype "lincRNA"
NC_000068.8	Novogene	exon	106473346	106473495	.	-	.	nearest_ref "NR_137201.1"; exon_number "1"; gene_id "102640562"; transcript_name "TCONS_00003221"; gene_biotype "lncRNA"; class_code "j"; transcript_id "TCONS_00003221"; gene_name "BB218582"; transcript_biotype "lincRNA"
NC_000068.8	Novogene	exon	106474046	106478406	.	-	.	nearest_ref "NR_137201.1"; exon_number "2"; gene_id "102640562"; transcript_name "TCONS_00003221"; gene_biotype "lncRNA"; class_code "j"; transcript_id "TCONS_00003221"; gene_name "BB218582"; transcript_biotype "lincRNA"
NC_000068.8	Novogene	exon	106480639	106480700	.	-	.	nearest_ref "NR_137201.1"; exon_number "3"; gene_id "102640562"; transcript_name "TCONS_00003221"; gene_biotype "lncRNA"; class_code "j"; transcript_id "TCONS_00003221"; gene_name "BB218582"; transcript_biotype "lincRNA"
NC_000068.8	Novogene	exon	113884798	113885847	.	-	.	nearest_ref "XR_001783436.2"; exon_number "1"; gene_id "108168784"; transcript_name "TCONS_00003234"; gene_biotype "lncRNA"; class_code "o"; transcript_id "TCONS_00003234"; gene_name "Gm46757"; transcript_biotype "sense_overlapping"
NC_000068.8	Novogene	exon	113887565	113887792	.	-	.	nearest_ref "XR_001783436.2"; exon_number "2"; gene_id "108168784"; transcript_name "TCONS_00003234"; gene_biotype "lncRNA"; class_code "o"; transcript_id "TCONS_00003234"; gene_name "Gm46757"; transcript_biotype "sense_overlapping"
NC_000068.8	Novogene	exon	113891277	113892026	.	-	.	nearest_ref "XR_001783436.2"; exon_number "3"; gene_id "108168784"; transcript_name "TCONS_00003234"; gene_biotype "lncRNA"; class_code "o"; transcript_id "TCONS_00003234"; gene_name "Gm46757"; transcript_biotype "sense_overlapping"
NC_000068.8	Novogene	exon	113884799	113885157	.	-	.	nearest_ref "XR_001783436.2"; exon_number "1"; gene_id "108168784"; transcript_name "TCONS_00003235"; gene_biotype "lncRNA"; class_code "o"; transcript_id "TCONS_00003235"; gene_name "Gm46757"; transcript_biotype "sense_overlapping"
NC_000068.8	Novogene	exon	113885522	113885847	.	-	.	nearest_ref "XR_001783436.2"; exon_number "2"; gene_id "108168784"; transcript_name "TCONS_00003235"; gene_biotype "lncRNA"; class_code "o"; transcript_id "TCONS_00003235"; gene_name "Gm46757"; transcript_biotype "sense_overlapping"
NC_000068.8	Novogene	exon	113887565	113887792	.	-	.	nearest_ref "XR_001783436.2"; exon_number "3"; gene_id "108168784"; transcript_name "TCONS_00003235"; gene_biotype "lncRNA"; class_code "o"; transcript_id "TCONS_00003235"; gene_name "Gm46757"; transcript_biotype "sense_overlapping"
NC_000068.8	Novogene	exon	113891277	113892589	.	-	.	nearest_ref "XR_001783436.2"; exon_number "4"; gene_id "108168784"; transcript_name "TCONS_00003235"; gene_biotype "lncRNA"; class_code "o"; transcript_id "TCONS_00003235"; gene_name "Gm46757"; transcript_biotype "sense_overlapping"
NC_000068.8	Novogene	exon	119727262	119727289	.	-	.	nearest_ref "XR_866290.4"; exon_number "1"; gene_id "29808"; transcript_name "TCONS_00003265"; gene_biotype "protein_coding"; class_code "x"; transcript_id "TCONS_00003265"; gene_name "Mga"; transcript_biotype "antisense"
NC_000068.8	Novogene	exon	119785589	119786091	.	-	.	nearest_ref "XR_866290.4"; exon_number "2"; gene_id "29808"; transcript_name "TCONS_00003265"; gene_biotype "protein_coding"; class_code "x"; transcript_id "TCONS_00003265"; gene_name "Mga"; transcript_biotype "antisense"
NC_000068.8	Novogene	exon	126732311	126736023	.	-	.	nearest_ref "XR_004940685.1"; exon_number "1"; gene_id "66552"; transcript_name "TCONS_00003333"; gene_biotype "protein_coding"; class_code "o"; transcript_id "TCONS_00003333"; gene_name "Sppl2a"; transcript_biotype "sense_overlapping"
NC_000068.8	Novogene	exon	126736065	126738161	.	-	.	nearest_ref "XR_004940685.1"; exon_number "2"; gene_id "66552"; transcript_name "TCONS_00003333"; gene_biotype "protein_coding"; class_code "o"; transcript_id "TCONS_00003333"; gene_name "Sppl2a"; transcript_biotype "sense_overlapping"
NC_000068.8	Novogene	exon	127046532	127046770	.	-	.	nearest_ref "NM_198630.2"; exon_number "1"; gene_id "329509"; transcript_name "TCONS_00003342"; gene_biotype "protein_coding"; class_code "j"; transcript_id "TCONS_00003342"; gene_name "1810024B03Rik"; transcript_biotype "others"
NC_000068.8	Novogene	exon	127050095	127050182	.	-	.	nearest_ref "NM_198630.2"; exon_number "2"; gene_id "329509"; transcript_name "TCONS_00003342"; gene_biotype "protein_coding"; class_code "j"; transcript_id "TCONS_00003342"; gene_name "1810024B03Rik"; transcript_biotype "others"
NC_000068.8	Novogene	exon	160101511	160102935	.	-	.	nearest_ref "XR_001783531.2"; exon_number "1"; gene_id "108168810"; transcript_name "TCONS_00003524"; gene_biotype "misc_RNA"; class_code "j"; transcript_id "TCONS_00003524"; gene_name "Gm46773"; transcript_biotype "lincRNA"
NC_000068.8	Novogene	exon	160159905	160159935	.	-	.	nearest_ref "XR_001783531.2"; exon_number "2"; gene_id "108168810"; transcript_name "TCONS_00003524"; gene_biotype "misc_RNA"; class_code "j"; transcript_id "TCONS_00003524"; gene_name "Gm46773"; transcript_biotype "lincRNA"
NC_000068.8	Novogene	exon	160169016	160169414	.	-	.	nearest_ref "XR_001783531.2"; exon_number "3"; gene_id "108168810"; transcript_name "TCONS_00003524"; gene_biotype "misc_RNA"; class_code "j"; transcript_id "TCONS_00003524"; gene_name "Gm46773"; transcript_biotype "lincRNA"
NC_000068.8	Novogene	exon	164715830	164721409	.	-	.	nearest_ref "XR_004940793.1"; exon_number "1"; gene_id "105244413"; transcript_name "TCONS_00003558"; gene_biotype "lncRNA"; class_code "o"; transcript_id "TCONS_00003558"; gene_name "4930445K14Rik"; transcript_biotype "sense_overlapping"
NC_000068.8	Novogene	exon	164724695	164725866	.	-	.	nearest_ref "XR_004940793.1"; exon_number "2"; gene_id "105244413"; transcript_name "TCONS_00003558"; gene_biotype "lncRNA"; class_code "o"; transcript_id "TCONS_00003558"; gene_name "4930445K14Rik"; transcript_biotype "sense_overlapping"
NC_000068.8	Novogene	exon	173436992	173438980	.	-	.	nearest_ref "NR_027957.1"; exon_number "1"; gene_id "100043911"; transcript_name "TCONS_00003617"; gene_biotype "transcribed_pseudogene"; class_code "j"; transcript_id "TCONS_00003617"; gene_name "Ppp4r1l-ps"; transcript_biotype "lincRNA"
NC_000068.8	Novogene	exon	173450526	173450672	.	-	.	nearest_ref "NR_027957.1"; exon_number "2"; gene_id "100043911"; transcript_name "TCONS_00003617"; gene_biotype "transcribed_pseudogene"; class_code "j"; transcript_id "TCONS_00003617"; gene_name "Ppp4r1l-ps"; transcript_biotype "lincRNA"
NC_000068.8	Novogene	exon	173457276	173457369	.	-	.	nearest_ref "NR_027957.1"; exon_number "3"; gene_id "100043911"; transcript_name "TCONS_00003617"; gene_biotype "transcribed_pseudogene"; class_code "j"; transcript_id "TCONS_00003617"; gene_name "Ppp4r1l-ps"; transcript_biotype "lincRNA"
NC_000068.8	Novogene	exon	173501116	173501240	.	-	.	nearest_ref "NR_027957.1"; exon_number "4"; gene_id "100043911"; transcript_name "TCONS_00003617"; gene_biotype "transcribed_pseudogene"; class_code "j"; transcript_id "TCONS_00003617"; gene_name "Ppp4r1l-ps"; transcript_biotype "lincRNA"
NC_000068.8	Novogene	exon	176543152	176543475	.	-	.	nearest_ref "NR_130970.1"; exon_number "1"; gene_id "102639598"; transcript_name "TCONS_00003640"; gene_biotype "protein_coding"; class_code "o"; transcript_id "TCONS_00003640"; gene_name "Gm14296"; transcript_biotype "sense_overlapping"
NC_000068.8	Novogene	exon	176748243	176748447	.	-	.	nearest_ref "NR_130970.1"; exon_number "2"; gene_id "102639598"; transcript_name "TCONS_00003640"; gene_biotype "protein_coding"; class_code "o"; transcript_id "TCONS_00003640"; gene_name "Gm14296"; transcript_biotype "sense_overlapping"
NC_000068.8	Novogene	exon	176640793	176640835	.	-	.	nearest_ref "XM_036162769.1"; exon_number "1"; gene_id "102639713"; transcript_name "TCONS_00003644"; gene_biotype "protein_coding"; class_code "o"; transcript_id "TCONS_00003644"; gene_name "Gm14421"; transcript_biotype "sense_overlapping"
NC_000068.8	Novogene	exon	176744673	176744960	.	-	.	nearest_ref "XM_036162769.1"; exon_number "2"; gene_id "102639713"; transcript_name "TCONS_00003644"; gene_biotype "protein_coding"; class_code "o"; transcript_id "TCONS_00003644"; gene_name "Gm14421"; transcript_biotype "sense_overlapping"
NC_000068.8	Novogene	exon	176748243	176748439	.	-	.	nearest_ref "XM_036162769.1"; exon_number "3"; gene_id "102639713"; transcript_name "TCONS_00003644"; gene_biotype "protein_coding"; class_code "o"; transcript_id "TCONS_00003644"; gene_name "Gm14421"; transcript_biotype "sense_overlapping"
NC_000069.7	Novogene	exon	52725098	52725318	.	+	.	exon_number "1"; gene_id "XLOC_002163"; transcript_name "TCONS_00003819"; gene_biotype "novel"; class_code "u"; transcript_id "TCONS_00003819"; gene_name "XLOC_002163"; transcript_biotype "lincRNA"
NC_000069.7	Novogene	exon	52728417	52728484	.	+	.	exon_number "2"; gene_id "XLOC_002163"; transcript_name "TCONS_00003819"; gene_biotype "novel"; class_code "u"; transcript_id "TCONS_00003819"; gene_name "XLOC_002163"; transcript_biotype "lincRNA"
NC_000069.7	Novogene	exon	52728790	52732541	.	+	.	exon_number "3"; gene_id "XLOC_002163"; transcript_name "TCONS_00003819"; gene_biotype "novel"; class_code "u"; transcript_id "TCONS_00003819"; gene_name "XLOC_002163"; transcript_biotype "lincRNA"
NC_000069.7	Novogene	exon	53018847	53020899	.	+	.	nearest_ref "NM_175386.3"; exon_number "1"; gene_id "108927"; transcript_name "TCONS_00003822"; gene_biotype "protein_coding"; class_code "i"; transcript_id "TCONS_00003822"; gene_name "Lhfp"; transcript_biotype "sense_intronic"
NC_000069.7	Novogene	exon	53026059	53029737	.	+	.	nearest_ref "NM_175386.3"; exon_number "2"; gene_id "108927"; transcript_name "TCONS_00003822"; gene_biotype "protein_coding"; class_code "i"; transcript_id "TCONS_00003822"; gene_name "Lhfp"; transcript_biotype "sense_intronic"
NC_000069.7	Novogene	exon	57857706	57858202	.	+	.	nearest_ref "XR_867304.3"; exon_number "1"; gene_id "102635402"; transcript_name "TCONS_00003841"; gene_biotype "lncRNA"; class_code "j"; transcript_id "TCONS_00003841"; gene_name "Gm32753"; transcript_biotype "lincRNA"
NC_000069.7	Novogene	exon	57877426	57877533	.	+	.	nearest_ref "XR_867304.3"; exon_number "2"; gene_id "102635402"; transcript_name "TCONS_00003841"; gene_biotype "lncRNA"; class_code "j"; transcript_id "TCONS_00003841"; gene_name "Gm32753"; transcript_biotype "lincRNA"
NC_000069.7	Novogene	exon	57884450	57884568	.	+	.	nearest_ref "XR_867304.3"; exon_number "3"; gene_id "102635402"; transcript_name "TCONS_00003841"; gene_biotype "lncRNA"; class_code "j"; transcript_id "TCONS_00003841"; gene_name "Gm32753"; transcript_biotype "lincRNA"
NC_000069.7	Novogene	exon	57885422	57885502	.	+	.	nearest_ref "XR_867304.3"; exon_number "4"; gene_id "102635402"; transcript_name "TCONS_00003841"; gene_biotype "lncRNA"; class_code "j"; transcript_id "TCONS_00003841"; gene_name "Gm32753"; transcript_biotype "lincRNA"
NC_000069.7	Novogene	exon	57886107	57893191	.	+	.	nearest_ref "XR_867304.3"; exon_number "5"; gene_id "102635402"; transcript_name "TCONS_00003841"; gene_biotype "lncRNA"; class_code "j"; transcript_id "TCONS_00003841"; gene_name "Gm32753"; transcript_biotype "lincRNA"
NC_000069.7	Novogene	exon	85648666	85648681	.	+	.	nearest_ref "NM_172682.3"; exon_number "1"; gene_id "229488"; transcript_name "TCONS_00003901"; gene_biotype "protein_coding"; class_code "x"; transcript_id "TCONS_00003901"; gene_name "Fam160a1"; transcript_biotype "antisense"
NC_000069.7	Novogene	exon	85692525	85692631	.	+	.	nearest_ref "NM_172682.3"; exon_number "2"; gene_id "229488"; transcript_name "TCONS_00003901"; gene_biotype "protein_coding"; class_code "x"; transcript_id "TCONS_00003901"; gene_name "Fam160a1"; transcript_biotype "antisense"
NC_000069.7	Novogene	exon	85724479	85724598	.	+	.	nearest_ref "NM_172682.3"; exon_number "3"; gene_id "229488"; transcript_name "TCONS_00003901"; gene_biotype "protein_coding"; class_code "x"; transcript_id "TCONS_00003901"; gene_name "Fam160a1"; transcript_biotype "antisense"
NC_000069.7	Novogene	exon	85794434	85794670	.	+	.	nearest_ref "NM_172682.3"; exon_number "4"; gene_id "229488"; transcript_name "TCONS_00003901"; gene_biotype "protein_coding"; class_code "x"; transcript_id "TCONS_00003901"; gene_name "Fam160a1"; transcript_biotype "antisense"
NC_000069.7	Novogene	exon	89299163	89299609	.	+	.	nearest_ref "NR_040403.1"; exon_number "1"; gene_id "545539"; transcript_name "TCONS_00003978"; gene_biotype "lncRNA"; class_code "j"; transcript_id "TCONS_00003978"; gene_name "Gm15417"; transcript_biotype "lincRNA"
NC_000069.7	Novogene	exon	89305266	89306086	.	+	.	nearest_ref "NR_040403.1"; exon_number "2"; gene_id "545539"; transcript_name "TCONS_00003978"; gene_biotype "lncRNA"; class_code "j"; transcript_id "TCONS_00003978"; gene_name "Gm15417"; transcript_biotype "lincRNA"
NC_000069.7	Novogene	exon	136383198	136383855	.	+	.	nearest_ref "XM_030252463.2"; exon_number "1"; gene_id "19055"; transcript_name "TCONS_00004258"; gene_biotype "protein_coding"; class_code "o"; transcript_id "TCONS_00004258"; gene_name "Ppp3ca"; transcript_biotype "sense_overlapping"
NC_000069.7	Novogene	exon	136494188	136495615	.	+	.	nearest_ref "XM_030252463.2"; exon_number "2"; gene_id "19055"; transcript_name "TCONS_00004258"; gene_biotype "protein_coding"; class_code "o"; transcript_id "TCONS_00004258"; gene_name "Ppp3ca"; transcript_biotype "sense_overlapping"
NC_000069.7	Novogene	exon	136383216	136384243	.	+	.	nearest_ref "XM_030252463.2"; exon_number "1"; gene_id "19055"; transcript_name "TCONS_00004259"; gene_biotype "protein_coding"; class_code "i"; transcript_id "TCONS_00004259"; gene_name "Ppp3ca"; transcript_biotype "sense_intronic"
NC_000069.7	Novogene	exon	136389244	136395582	.	+	.	nearest_ref "XM_030252463.2"; exon_number "2"; gene_id "19055"; transcript_name "TCONS_00004259"; gene_biotype "protein_coding"; class_code "i"; transcript_id "TCONS_00004259"; gene_name "Ppp3ca"; transcript_biotype "sense_intronic"
NC_000069.7	Novogene	exon	20529007	20529133	.	-	.	nearest_ref "XR_001783795.1"; exon_number "1"; gene_id "108168860"; transcript_name "TCONS_00004375"; gene_biotype "lncRNA"; class_code "i"; transcript_id "TCONS_00004375"; gene_name "Gm31466"; transcript_biotype "sense_intronic"
NC_000069.7	Novogene	exon	20529156	20529478	.	-	.	nearest_ref "XR_001783795.1"; exon_number "2"; gene_id "108168860"; transcript_name "TCONS_00004375"; gene_biotype "lncRNA"; class_code "i"; transcript_id "TCONS_00004375"; gene_name "Gm31466"; transcript_biotype "sense_intronic"
NC_000069.7	Novogene	exon	85668412	85689830	.	-	.	nearest_ref "NM_177130.3"; exon_number "1"; gene_id "320302"; transcript_name "TCONS_00004526"; gene_biotype "protein_coding"; class_code "j"; transcript_id "TCONS_00004526"; gene_name "Glt28d2"; transcript_biotype "others"
NC_000069.7	Novogene	exon	85692525	85692631	.	-	.	nearest_ref "NM_177130.3"; exon_number "2"; gene_id "320302"; transcript_name "TCONS_00004526"; gene_biotype "protein_coding"; class_code "j"; transcript_id "TCONS_00004526"; gene_name "Glt28d2"; transcript_biotype "others"
NC_000069.7	Novogene	exon	85724479	85724598	.	-	.	nearest_ref "NM_177130.3"; exon_number "3"; gene_id "320302"; transcript_name "TCONS_00004526"; gene_biotype "protein_coding"; class_code "j"; transcript_id "TCONS_00004526"; gene_name "Glt28d2"; transcript_biotype "others"
NC_000069.7	Novogene	exon	85794434	85794825	.	-	.	nearest_ref "NM_177130.3"; exon_number "4"; gene_id "320302"; transcript_name "TCONS_00004526"; gene_biotype "protein_coding"; class_code "j"; transcript_id "TCONS_00004526"; gene_name "Glt28d2"; transcript_biotype "others"
NC_000069.7	Novogene	exon	89671852	89671900	.	-	.	nearest_ref "NR_130957.1"; exon_number "1"; gene_id "74034"; transcript_name "TCONS_00004581"; gene_biotype "lncRNA"; class_code "j"; transcript_id "TCONS_00004581"; gene_name "4632404H12Rik"; transcript_biotype "lincRNA"
NC_000069.7	Novogene	exon	89672888	89672942	.	-	.	nearest_ref "NR_130957.1"; exon_number "2"; gene_id "74034"; transcript_name "TCONS_00004581"; gene_biotype "lncRNA"; class_code "j"; transcript_id "TCONS_00004581"; gene_name "4632404H12Rik"; transcript_biotype "lincRNA"
NC_000069.7	Novogene	exon	89679809	89680717	.	-	.	nearest_ref "NR_130957.1"; exon_number "3"; gene_id "74034"; transcript_name "TCONS_00004581"; gene_biotype "lncRNA"; class_code "j"; transcript_id "TCONS_00004581"; gene_name "4632404H12Rik"; transcript_biotype "lincRNA"
NC_000069.7	Novogene	exon	95951814	95952205	.	-	.	nearest_ref "NM_013841.3"; exon_number "1"; gene_id "22365"; transcript_name "TCONS_00004657"; gene_biotype "protein_coding"; class_code "i"; transcript_id "TCONS_00004657"; gene_name "Vps45"; transcript_biotype "sense_intronic"
NC_000069.7	Novogene	exon	95952274	95952368	.	-	.	nearest_ref "NM_013841.3"; exon_number "2"; gene_id "22365"; transcript_name "TCONS_00004657"; gene_biotype "protein_coding"; class_code "i"; transcript_id "TCONS_00004657"; gene_name "Vps45"; transcript_biotype "sense_intronic"
NC_000069.7	Novogene	exon	105729044	105729348	.	-	.	exon_number "1"; gene_id "XLOC_002735"; transcript_name "TCONS_00004722"; gene_biotype "novel"; class_code "u"; transcript_id "TCONS_00004722"; gene_name "XLOC_002735"; transcript_biotype "lincRNA"
NC_000069.7	Novogene	exon	105732448	105732523	.	-	.	exon_number "2"; gene_id "XLOC_002735"; transcript_name "TCONS_00004722"; gene_biotype "novel"; class_code "u"; transcript_id "TCONS_00004722"; gene_name "XLOC_002735"; transcript_biotype "lincRNA"
NC_000069.7	Novogene	exon	105733070	105733178	.	-	.	exon_number "3"; gene_id "XLOC_002735"; transcript_name "TCONS_00004722"; gene_biotype "novel"; class_code "u"; transcript_id "TCONS_00004722"; gene_name "XLOC_002735"; transcript_biotype "lincRNA"
NC_000069.7	Novogene	exon	115130494	115130549	.	-	.	nearest_ref "XR_004941745.1"; exon_number "1"; gene_id "115486210"; transcript_name "TCONS_00004758"; gene_biotype "snoRNA"; class_code "x"; transcript_id "TCONS_00004758"; gene_name "Gm22337"; transcript_biotype "antisense"
NC_000069.7	Novogene	exon	115220517	115222631	.	-	.	nearest_ref "XR_004941745.1"; exon_number "2"; gene_id "115486210"; transcript_name "TCONS_00004758"; gene_biotype "snoRNA"; class_code "x"; transcript_id "TCONS_00004758"; gene_name "Gm22337"; transcript_biotype "antisense"
NC_000069.7	Novogene	exon	115675234	115675487	.	-	.	nearest_ref "NR_027894.1"; exon_number "1"; gene_id "68161"; transcript_name "TCONS_00004763"; gene_biotype "lncRNA"; class_code "j"; transcript_id "TCONS_00004763"; gene_name "A930005H10Rik"; transcript_biotype "lincRNA"
NC_000069.7	Novogene	exon	115681425	115681769	.	-	.	nearest_ref "NR_027894.1"; exon_number "2"; gene_id "68161"; transcript_name "TCONS_00004763"; gene_biotype "lncRNA"; class_code "j"; transcript_id "TCONS_00004763"; gene_name "A930005H10Rik"; transcript_biotype "lincRNA"
NC_000069.7	Novogene	exon	123019825	123023243	.	-	.	nearest_ref "NM_080451.2"; exon_number "1"; gene_id "118449"; transcript_name "TCONS_00004800"; gene_biotype "protein_coding"; class_code "o"; transcript_id "TCONS_00004800"; gene_name "Synpo2"; transcript_biotype "sense_overlapping"
NC_000069.7	Novogene	exon	123023280	123029798	.	-	.	nearest_ref "NM_080451.2"; exon_number "2"; gene_id "118449"; transcript_name "TCONS_00004800"; gene_biotype "protein_coding"; class_code "o"; transcript_id "TCONS_00004800"; gene_name "Synpo2"; transcript_biotype "sense_overlapping"
NC_000069.7	Novogene	exon	122978742	122980763	.	-	.	nearest_ref "NM_080451.2"; exon_number "1"; gene_id "118449"; transcript_name "TCONS_00004797"; gene_biotype "protein_coding"; class_code "i"; transcript_id "TCONS_00004797"; gene_name "Synpo2"; transcript_biotype "sense_intronic"
NC_000069.7	Novogene	exon	122980854	122989205	.	-	.	nearest_ref "NM_080451.2"; exon_number "2"; gene_id "118449"; transcript_name "TCONS_00004797"; gene_biotype "protein_coding"; class_code "i"; transcript_id "TCONS_00004797"; gene_name "Synpo2"; transcript_biotype "sense_intronic"
NC_000069.7	Novogene	exon	127116918	127118588	.	-	.	nearest_ref "XM_036162852.1"; exon_number "1"; gene_id "109676"; transcript_name "TCONS_00004834"; gene_biotype "protein_coding"; class_code "j"; transcript_id "TCONS_00004834"; gene_name "Ank2"; transcript_biotype "others"
NC_000069.7	Novogene	exon	127118719	127132841	.	-	.	nearest_ref "XM_036162852.1"; exon_number "2"; gene_id "109676"; transcript_name "TCONS_00004834"; gene_biotype "protein_coding"; class_code "j"; transcript_id "TCONS_00004834"; gene_name "Ank2"; transcript_biotype "others"
NC_000069.7	Novogene	exon	127292317	127294640	.	-	.	nearest_ref "XM_036162852.1"; exon_number "3"; gene_id "109676"; transcript_name "TCONS_00004834"; gene_biotype "protein_coding"; class_code "j"; transcript_id "TCONS_00004834"; gene_name "Ank2"; transcript_biotype "others"
NC_000070.7	Novogene	exon	11976922	11977102	.	+	.	nearest_ref "NR_040577.1"; exon_number "1"; gene_id "100503636"; transcript_name "TCONS_00004974"; gene_biotype "lncRNA"; class_code "j"; transcript_id "TCONS_00004974"; gene_name "1700123M08Rik"; transcript_biotype "lincRNA"
NC_000070.7	Novogene	exon	11980142	11980408	.	+	.	nearest_ref "NR_040577.1"; exon_number "2"; gene_id "100503636"; transcript_name "TCONS_00004974"; gene_biotype "lncRNA"; class_code "j"; transcript_id "TCONS_00004974"; gene_name "1700123M08Rik"; transcript_biotype "lincRNA"
NC_000070.7	Novogene	exon	11993865	11995091	.	+	.	nearest_ref "NR_040577.1"; exon_number "3"; gene_id "100503636"; transcript_name "TCONS_00004974"; gene_biotype "lncRNA"; class_code "j"; transcript_id "TCONS_00004974"; gene_name "1700123M08Rik"; transcript_biotype "lincRNA"
NC_000070.7	Novogene	exon	42194961	42196342	.	+	.	nearest_ref "NM_001378605.1"; exon_number "1"; gene_id "100042493"; transcript_name "TCONS_00005056"; gene_biotype "protein_coding"; class_code "o"; transcript_id "TCONS_00005056"; gene_name "Ccl21b"; transcript_biotype "sense_overlapping"
NC_000070.7	Novogene	exon	42357941	42359429	.	+	.	nearest_ref "NM_001378605.1"; exon_number "2"; gene_id "100042493"; transcript_name "TCONS_00005056"; gene_biotype "protein_coding"; class_code "o"; transcript_id "TCONS_00005056"; gene_name "Ccl21b"; transcript_biotype "sense_overlapping"
NC_000070.7	Novogene	exon	43045973	43046243	.	+	.	nearest_ref "XM_036163977.1"; exon_number "1"; gene_id "22249"; transcript_name "TCONS_00005067"; gene_biotype "protein_coding"; class_code "o"; transcript_id "TCONS_00005067"; gene_name "Unc13b"; transcript_biotype "sense_overlapping"
NC_000070.7	Novogene	exon	43051237	43051377	.	+	.	nearest_ref "XM_036163977.1"; exon_number "2"; gene_id "22249"; transcript_name "TCONS_00005067"; gene_biotype "protein_coding"; class_code "o"; transcript_id "TCONS_00005067"; gene_name "Unc13b"; transcript_biotype "sense_overlapping"
NC_000070.7	Novogene	exon	43053154	43053260	.	+	.	nearest_ref "XM_036163977.1"; exon_number "3"; gene_id "22249"; transcript_name "TCONS_00005067"; gene_biotype "protein_coding"; class_code "o"; transcript_id "TCONS_00005067"; gene_name "Unc13b"; transcript_biotype "sense_overlapping"
NC_000070.7	Novogene	exon	81984123	81984856	.	+	.	nearest_ref "NR_040659.1"; exon_number "1"; gene_id "545641"; transcript_name "TCONS_00005192"; gene_biotype "lncRNA"; class_code "o"; transcript_id "TCONS_00005192"; gene_name "Gm5860"; transcript_biotype "sense_overlapping"
NC_000070.7	Novogene	exon	81984909	81986291	.	+	.	nearest_ref "NR_040659.1"; exon_number "2"; gene_id "545641"; transcript_name "TCONS_00005192"; gene_biotype "lncRNA"; class_code "o"; transcript_id "TCONS_00005192"; gene_name "Gm5860"; transcript_biotype "sense_overlapping"
NC_000070.7	Novogene	exon	115924139	115924369	.	+	.	nearest_ref "XM_036164626.1"; exon_number "1"; gene_id "102637129"; transcript_name "TCONS_00005316"; gene_biotype "protein_coding"; class_code "o"; transcript_id "TCONS_00005316"; gene_name "Gm12854"; transcript_biotype "sense_overlapping"
NC_000070.7	Novogene	exon	115927060	115927221	.	+	.	nearest_ref "XM_036164626.1"; exon_number "2"; gene_id "102637129"; transcript_name "TCONS_00005316"; gene_biotype "protein_coding"; class_code "o"; transcript_id "TCONS_00005316"; gene_name "Gm12854"; transcript_biotype "sense_overlapping"
NC_000070.7	Novogene	exon	115927934	115927954	.	+	.	nearest_ref "XM_036164626.1"; exon_number "3"; gene_id "102637129"; transcript_name "TCONS_00005316"; gene_biotype "protein_coding"; class_code "o"; transcript_id "TCONS_00005316"; gene_name "Gm12854"; transcript_biotype "sense_overlapping"
NC_000070.7	Novogene	exon	115932113	115932281	.	+	.	nearest_ref "XM_036164626.1"; exon_number "4"; gene_id "102637129"; transcript_name "TCONS_00005316"; gene_biotype "protein_coding"; class_code "o"; transcript_id "TCONS_00005316"; gene_name "Gm12854"; transcript_biotype "sense_overlapping"
NC_000070.7	Novogene	exon	117644465	117644858	.	+	.	exon_number "1"; gene_id "XLOC_003107"; transcript_name "TCONS_00005335"; gene_biotype "novel"; class_code "u"; transcript_id "TCONS_00005335"; gene_name "XLOC_003107"; transcript_biotype "lincRNA"
NC_000070.7	Novogene	exon	117646513	117648847	.	+	.	exon_number "2"; gene_id "XLOC_003107"; transcript_name "TCONS_00005335"; gene_biotype "novel"; class_code "u"; transcript_id "TCONS_00005335"; gene_name "XLOC_003107"; transcript_biotype "lincRNA"
NC_000070.7	Novogene	exon	132857944	132863354	.	+	.	nearest_ref "XM_006538849.5"; exon_number "1"; gene_id "242687"; transcript_name "TCONS_00005470"; gene_biotype "protein_coding"; class_code "o"; transcript_id "TCONS_00005470"; gene_name "Wasf2"; transcript_biotype "sense_overlapping"
NC_000070.7	Novogene	exon	132868123	132881863	.	+	.	nearest_ref "XM_006538849.5"; exon_number "2"; gene_id "242687"; transcript_name "TCONS_00005470"; gene_biotype "protein_coding"; class_code "o"; transcript_id "TCONS_00005470"; gene_name "Wasf2"; transcript_biotype "sense_overlapping"
NC_000070.7	Novogene	exon	133886701	133886972	.	+	.	nearest_ref "NM_144527.3"; exon_number "1"; gene_id "70012"; transcript_name "TCONS_00005483"; gene_biotype "protein_coding"; class_code "i"; transcript_id "TCONS_00005483"; gene_name "Cep85"; transcript_biotype "sense_intronic"
NC_000070.7	Novogene	exon	133891738	133892012	.	+	.	nearest_ref "NM_144527.3"; exon_number "2"; gene_id "70012"; transcript_name "TCONS_00005483"; gene_biotype "protein_coding"; class_code "i"; transcript_id "TCONS_00005483"; gene_name "Cep85"; transcript_biotype "sense_intronic"
NC_000070.7	Novogene	exon	136249987	136253884	.	+	.	nearest_ref "XR_390755.2"; exon_number "1"; gene_id "269593"; transcript_name "TCONS_00005524"; gene_biotype "protein_coding"; class_code "i"; transcript_id "TCONS_00005524"; gene_name "Luzp1"; transcript_biotype "sense_intronic"
NC_000070.7	Novogene	exon	136253966	136254140	.	+	.	nearest_ref "XR_390755.2"; exon_number "2"; gene_id "269593"; transcript_name "TCONS_00005524"; gene_biotype "protein_coding"; class_code "i"; transcript_id "TCONS_00005524"; gene_name "Luzp1"; transcript_biotype "sense_intronic"
NC_000070.7	Novogene	exon	138184380	138186347	.	+	.	nearest_ref "NM_025451.2"; exon_number "1"; gene_id "66259"; transcript_name "TCONS_00005561"; gene_biotype "protein_coding"; class_code "o"; transcript_id "TCONS_00005561"; gene_name "Camk2n1"; transcript_biotype "sense_overlapping"
NC_000070.7	Novogene	exon	138186453	138187437	.	+	.	nearest_ref "NM_025451.2"; exon_number "2"; gene_id "66259"; transcript_name "TCONS_00005561"; gene_biotype "protein_coding"; class_code "o"; transcript_id "TCONS_00005561"; gene_name "Camk2n1"; transcript_biotype "sense_overlapping"
NC_000070.7	Novogene	exon	14137953	14137986	.	-	.	nearest_ref "NR_131155.1"; exon_number "1"; gene_id "100040030"; transcript_name "TCONS_00005785"; gene_biotype "lncRNA"; class_code "o"; transcript_id "TCONS_00005785"; gene_name "Gm2560"; transcript_biotype "sense_overlapping"
NC_000070.7	Novogene	exon	14231162	14231842	.	-	.	nearest_ref "NR_131155.1"; exon_number "2"; gene_id "100040030"; transcript_name "TCONS_00005785"; gene_biotype "lncRNA"; class_code "o"; transcript_id "TCONS_00005785"; gene_name "Gm2560"; transcript_biotype "sense_overlapping"
NC_000070.7	Novogene	exon	38728998	38729386	.	-	.	nearest_ref "NR_151606.1"; exon_number "1"; gene_id "102636968"; transcript_name "TCONS_00005826"; gene_biotype "lncRNA"; class_code "j"; transcript_id "TCONS_00005826"; gene_name "Gm12381"; transcript_biotype "lincRNA"
NC_000070.7	Novogene	exon	38855262	38855528	.	-	.	nearest_ref "NR_151606.1"; exon_number "2"; gene_id "102636968"; transcript_name "TCONS_00005826"; gene_biotype "lncRNA"; class_code "j"; transcript_id "TCONS_00005826"; gene_name "Gm12381"; transcript_biotype "lincRNA"
NC_000070.7	Novogene	exon	38827106	38832905	.	-	.	nearest_ref "NR_151606.1"; exon_number "1"; gene_id "102636968"; transcript_name "TCONS_00005828"; gene_biotype "lncRNA"; class_code "j"; transcript_id "TCONS_00005828"; gene_name "Gm12381"; transcript_biotype "lincRNA"
NC_000070.7	Novogene	exon	38855262	38855474	.	-	.	nearest_ref "NR_151606.1"; exon_number "2"; gene_id "102636968"; transcript_name "TCONS_00005828"; gene_biotype "lncRNA"; class_code "j"; transcript_id "TCONS_00005828"; gene_name "Gm12381"; transcript_biotype "lincRNA"
NC_000070.7	Novogene	exon	50786507	50789216	.	-	.	nearest_ref "XR_881276.1"; exon_number "1"; gene_id "105247133"; transcript_name "TCONS_00005918"; gene_biotype "lncRNA"; class_code "j"; transcript_id "TCONS_00005918"; gene_name "Gm42288"; transcript_biotype "lincRNA"
NC_000070.7	Novogene	exon	50826975	50827138	.	-	.	nearest_ref "XR_881276.1"; exon_number "2"; gene_id "105247133"; transcript_name "TCONS_00005918"; gene_biotype "lncRNA"; class_code "j"; transcript_id "TCONS_00005918"; gene_name "Gm42288"; transcript_biotype "lincRNA"
NC_000070.7	Novogene	exon	88912878	88914515	.	-	.	nearest_ref "NR_166610.1"; exon_number "1"; gene_id "102637866"; transcript_name "TCONS_00006008"; gene_biotype "lncRNA"; class_code "x"; transcript_id "TCONS_00006008"; gene_name "Gm34568"; transcript_biotype "antisense"
NC_000070.7	Novogene	exon	88957259	88957430	.	-	.	nearest_ref "NR_166610.1"; exon_number "2"; gene_id "102637866"; transcript_name "TCONS_00006008"; gene_biotype "lncRNA"; class_code "x"; transcript_id "TCONS_00006008"; gene_name "Gm34568"; transcript_biotype "antisense"
NC_000070.7	Novogene	exon	101200769	101208749	.	-	.	nearest_ref "NR_040708.1"; exon_number "1"; gene_id "77866"; transcript_name "TCONS_00006025"; gene_biotype "lncRNA"; class_code "o"; transcript_id "TCONS_00006025"; gene_name "E130102H24Rik"; transcript_biotype "sense_overlapping"
NC_000070.7	Novogene	exon	101208786	101213873	.	-	.	nearest_ref "NR_040708.1"; exon_number "2"; gene_id "77866"; transcript_name "TCONS_00006025"; gene_biotype "lncRNA"; class_code "o"; transcript_id "TCONS_00006025"; gene_name "E130102H24Rik"; transcript_biotype "sense_overlapping"
NC_000070.7	Novogene	exon	120649137	120654264	.	-	.	nearest_ref "XR_004941831.1"; exon_number "1"; gene_id "18046"; transcript_name "TCONS_00006138"; gene_biotype "protein_coding"; class_code "o"; transcript_id "TCONS_00006138"; gene_name "Nfyc"; transcript_biotype "sense_overlapping"
NC_000070.7	Novogene	exon	120655623	120672910	.	-	.	nearest_ref "XR_004941831.1"; exon_number "2"; gene_id "18046"; transcript_name "TCONS_00006138"; gene_biotype "protein_coding"; class_code "o"; transcript_id "TCONS_00006138"; gene_name "Nfyc"; transcript_biotype "sense_overlapping"
NC_000070.7	Novogene	exon	123539811	123544352	.	-	.	nearest_ref "102638752.1"; exon_number "1"; gene_id "102638752"; transcript_name "TCONS_00006188"; gene_biotype "pseudogene"; class_code "o"; transcript_id "TCONS_00006188"; gene_name "Gm35241"; transcript_biotype "sense_overlapping"
NC_000070.7	Novogene	exon	123552708	123557725	.	-	.	nearest_ref "102638752.1"; exon_number "2"; gene_id "102638752"; transcript_name "TCONS_00006188"; gene_biotype "pseudogene"; class_code "o"; transcript_id "TCONS_00006188"; gene_name "Gm35241"; transcript_biotype "sense_overlapping"
NC_000070.7	Novogene	exon	133467863	133471619	.	-	.	nearest_ref "XM_006539325.5"; exon_number "1"; gene_id "93760"; transcript_name "TCONS_00006288"; gene_biotype "protein_coding"; class_code "i"; transcript_id "TCONS_00006288"; gene_name "Arid1a"; transcript_biotype "sense_intronic"
NC_000070.7	Novogene	exon	133472985	133479436	.	-	.	nearest_ref "XM_006539325.5"; exon_number "2"; gene_id "93760"; transcript_name "TCONS_00006288"; gene_biotype "protein_coding"; class_code "i"; transcript_id "TCONS_00006288"; gene_name "Arid1a"; transcript_biotype "sense_intronic"
NC_000070.7	Novogene	exon	141334443	141334464	.	-	.	exon_number "1"; gene_id "XLOC_003743"; transcript_name "TCONS_00006397"; gene_biotype "novel"; class_code "u"; transcript_id "TCONS_00006397"; gene_name "XLOC_003743"; transcript_biotype "lincRNA"
NC_000070.7	Novogene	exon	141334534	141334734	.	-	.	exon_number "2"; gene_id "XLOC_003743"; transcript_name "TCONS_00006397"; gene_biotype "novel"; class_code "u"; transcript_id "TCONS_00006397"; gene_name "XLOC_003743"; transcript_biotype "lincRNA"
NC_000070.7	Novogene	exon	155258938	155263500	.	-	.	nearest_ref "NM_011385.2"; exon_number "1"; gene_id "20481"; transcript_name "TCONS_00006530"; gene_biotype "protein_coding"; class_code "i"; transcript_id "TCONS_00006530"; gene_name "Ski"; transcript_biotype "sense_intronic"
NC_000070.7	Novogene	exon	155263593	155271876	.	-	.	nearest_ref "NM_011385.2"; exon_number "2"; gene_id "20481"; transcript_name "TCONS_00006530"; gene_biotype "protein_coding"; class_code "i"; transcript_id "TCONS_00006530"; gene_name "Ski"; transcript_biotype "sense_intronic"
NC_000070.7	Novogene	exon	155276238	155280276	.	-	.	nearest_ref "NM_011385.2"; exon_number "1"; gene_id "20481"; transcript_name "TCONS_00006531"; gene_biotype "protein_coding"; class_code "i"; transcript_id "TCONS_00006531"; gene_name "Ski"; transcript_biotype "sense_intronic"
NC_000070.7	Novogene	exon	155282696	155291048	.	-	.	nearest_ref "NM_011385.2"; exon_number "2"; gene_id "20481"; transcript_name "TCONS_00006531"; gene_biotype "protein_coding"; class_code "i"; transcript_id "TCONS_00006531"; gene_name "Ski"; transcript_biotype "sense_intronic"
NC_000071.7	Novogene	exon	9794320	9794602	.	+	.	nearest_ref "XR_004942799.1"; exon_number "1"; gene_id "115490243"; transcript_name "TCONS_00006578"; gene_biotype "snRNA"; class_code "x"; transcript_id "TCONS_00006578"; gene_name "Gm23312"; transcript_biotype "antisense"
NC_000071.7	Novogene	exon	9808673	9809074	.	+	.	nearest_ref "XR_004942799.1"; exon_number "2"; gene_id "115490243"; transcript_name "TCONS_00006578"; gene_biotype "snRNA"; class_code "x"; transcript_id "TCONS_00006578"; gene_name "Gm23312"; transcript_biotype "antisense"
NC_000071.7	Novogene	exon	52348026	52348279	.	+	.	nearest_ref "NR_015537.2"; exon_number "1"; gene_id "414108"; transcript_name "TCONS_00006761"; gene_biotype "lncRNA"; class_code "j"; transcript_id "TCONS_00006761"; gene_name "9230114K14Rik"; transcript_biotype "lincRNA"
NC_000071.7	Novogene	exon	52350260	52350320	.	+	.	nearest_ref "NR_015537.2"; exon_number "2"; gene_id "414108"; transcript_name "TCONS_00006761"; gene_biotype "lncRNA"; class_code "j"; transcript_id "TCONS_00006761"; gene_name "9230114K14Rik"; transcript_biotype "lincRNA"
NC_000071.7	Novogene	exon	52352143	52352232	.	+	.	nearest_ref "NR_015537.2"; exon_number "3"; gene_id "414108"; transcript_name "TCONS_00006761"; gene_biotype "lncRNA"; class_code "j"; transcript_id "TCONS_00006761"; gene_name "9230114K14Rik"; transcript_biotype "lincRNA"
NC_000071.7	Novogene	exon	52354235	52362331	.	+	.	nearest_ref "NR_015537.2"; exon_number "4"; gene_id "414108"; transcript_name "TCONS_00006761"; gene_biotype "lncRNA"; class_code "j"; transcript_id "TCONS_00006761"; gene_name "9230114K14Rik"; transcript_biotype "lincRNA"
NC_000071.7	Novogene	exon	58201447	58201837	.	+	.	nearest_ref "XM_006504023.4"; exon_number "1"; gene_id "54216"; transcript_name "TCONS_00006791"; gene_biotype "protein_coding"; class_code "i"; transcript_id "TCONS_00006791"; gene_name "Pcdh7"; transcript_biotype "sense_intronic"
NC_000071.7	Novogene	exon	58283517	58284086	.	+	.	nearest_ref "XM_006504023.4"; exon_number "2"; gene_id "54216"; transcript_name "TCONS_00006791"; gene_biotype "protein_coding"; class_code "i"; transcript_id "TCONS_00006791"; gene_name "Pcdh7"; transcript_biotype "sense_intronic"
NC_000071.7	Novogene	exon	65697698	65715509	.	+	.	nearest_ref "NM_016786.4"; exon_number "1"; gene_id "53323"; transcript_name "TCONS_00006807"; gene_biotype "protein_coding"; class_code "o"; transcript_id "TCONS_00006807"; gene_name "Ube2k"; transcript_biotype "sense_overlapping"
NC_000071.7	Novogene	exon	65742222	65747331	.	+	.	nearest_ref "NM_016786.4"; exon_number "2"; gene_id "53323"; transcript_name "TCONS_00006807"; gene_biotype "protein_coding"; class_code "o"; transcript_id "TCONS_00006807"; gene_name "Ube2k"; transcript_biotype "sense_overlapping"
NC_000071.7	Novogene	exon	74253758	74254080	.	+	.	nearest_ref "NR_145131.1"; exon_number "1"; gene_id "70036"; transcript_name "TCONS_00006827"; gene_biotype "lncRNA"; class_code "j"; transcript_id "TCONS_00006827"; gene_name "Dancr"; transcript_biotype "lincRNA"
NC_000071.7	Novogene	exon	74254549	74254993	.	+	.	nearest_ref "NR_145131.1"; exon_number "2"; gene_id "70036"; transcript_name "TCONS_00006827"; gene_biotype "lncRNA"; class_code "j"; transcript_id "TCONS_00006827"; gene_name "Dancr"; transcript_biotype "lincRNA"
NC_000071.7	Novogene	exon	103839934	103839960	.	+	.	nearest_ref "XM_006534801.5"; exon_number "1"; gene_id "17355"; transcript_name "TCONS_00006915"; gene_biotype "protein_coding"; class_code "o"; transcript_id "TCONS_00006915"; gene_name "Aff1"; transcript_biotype "sense_overlapping"
NC_000071.7	Novogene	exon	103864293	103875151	.	+	.	nearest_ref "XM_006534801.5"; exon_number "2"; gene_id "17355"; transcript_name "TCONS_00006915"; gene_biotype "protein_coding"; class_code "o"; transcript_id "TCONS_00006915"; gene_name "Aff1"; transcript_biotype "sense_overlapping"
NC_000071.7	Novogene	exon	109792660	109792790	.	+	.	exon_number "1"; gene_id "XLOC_004078"; transcript_name "TCONS_00006945"; gene_biotype "novel"; class_code "u"; transcript_id "TCONS_00006945"; gene_name "XLOC_004078"; transcript_biotype "lincRNA"
NC_000071.7	Novogene	exon	109800786	109800928	.	+	.	exon_number "2"; gene_id "XLOC_004078"; transcript_name "TCONS_00006945"; gene_biotype "novel"; class_code "u"; transcript_id "TCONS_00006945"; gene_name "XLOC_004078"; transcript_biotype "lincRNA"
NC_000071.7	Novogene	exon	121888455	121893674	.	+	.	nearest_ref "NM_009125.2"; exon_number "1"; gene_id "20239"; transcript_name "TCONS_00007067"; gene_biotype "protein_coding"; class_code "i"; transcript_id "TCONS_00007067"; gene_name "Atxn2"; transcript_biotype "sense_intronic"
NC_000071.7	Novogene	exon	121893785	121895893	.	+	.	nearest_ref "NM_009125.2"; exon_number "2"; gene_id "20239"; transcript_name "TCONS_00007067"; gene_biotype "protein_coding"; class_code "i"; transcript_id "TCONS_00007067"; gene_name "Atxn2"; transcript_biotype "sense_intronic"
NC_000071.7	Novogene	exon	124324778	124325022	.	+	.	nearest_ref "NR_165290.1"; exon_number "1"; gene_id "115490137"; transcript_name "TCONS_00007105"; gene_biotype "lncRNA"; class_code "j"; transcript_id "TCONS_00007105"; gene_name "LOC115490137"; transcript_biotype "lincRNA"
NC_000071.7	Novogene	exon	124325136	124325259	.	+	.	nearest_ref "NR_165290.1"; exon_number "2"; gene_id "115490137"; transcript_name "TCONS_00007105"; gene_biotype "lncRNA"; class_code "j"; transcript_id "TCONS_00007105"; gene_name "LOC115490137"; transcript_biotype "lincRNA"
NC_000071.7	Novogene	exon	124326247	124326480	.	+	.	nearest_ref "NR_165290.1"; exon_number "3"; gene_id "115490137"; transcript_name "TCONS_00007105"; gene_biotype "lncRNA"; class_code "j"; transcript_id "TCONS_00007105"; gene_name "LOC115490137"; transcript_biotype "lincRNA"
NC_000071.7	Novogene	exon	150042074	150042276	.	+	.	nearest_ref "XM_030254574.2"; exon_number "1"; gene_id "320365"; transcript_name "TCONS_00007332"; gene_biotype "protein_coding"; class_code "j"; transcript_id "TCONS_00007332"; gene_name "Fry"; transcript_biotype "others"
NC_000071.7	Novogene	exon	150063734	150066116	.	+	.	nearest_ref "XM_030254574.2"; exon_number "2"; gene_id "320365"; transcript_name "TCONS_00007332"; gene_biotype "protein_coding"; class_code "j"; transcript_id "TCONS_00007332"; gene_name "Fry"; transcript_biotype "others"
NC_000071.7	Novogene	exon	23811858	23813932	.	-	.	nearest_ref "XM_030254316.2"; exon_number "1"; gene_id "20817"; transcript_name "TCONS_00007406"; gene_biotype "protein_coding"; class_code "j"; transcript_id "TCONS_00007406"; gene_name "Srpk2"; transcript_biotype "others"
NC_000071.7	Novogene	exon	23821325	23821569	.	-	.	nearest_ref "XM_030254316.2"; exon_number "2"; gene_id "20817"; transcript_name "TCONS_00007406"; gene_biotype "protein_coding"; class_code "j"; transcript_id "TCONS_00007406"; gene_name "Srpk2"; transcript_biotype "others"
NC_000071.7	Novogene	exon	36819388	36825364	.	-	.	nearest_ref "XR_004942804.1"; exon_number "1"; gene_id "115490251"; transcript_name "TCONS_00007513"; gene_biotype "snRNA"; class_code "o"; transcript_id "TCONS_00007513"; gene_name "Gm24878"; transcript_biotype "sense_overlapping"
NC_000071.7	Novogene	exon	36827298	36828069	.	-	.	nearest_ref "XR_004942804.1"; exon_number "2"; gene_id "115490251"; transcript_name "TCONS_00007513"; gene_biotype "snRNA"; class_code "o"; transcript_id "TCONS_00007513"; gene_name "Gm24878"; transcript_biotype "sense_overlapping"
NC_000071.7	Novogene	exon	77281957	77286430	.	-	.	exon_number "1"; gene_id "XLOC_004492"; transcript_name "TCONS_00007618"; gene_biotype "novel"; class_code "u"; transcript_id "TCONS_00007618"; gene_name "XLOC_004492"; transcript_biotype "lincRNA"
NC_000071.7	Novogene	exon	77288077	77288152	.	-	.	exon_number "2"; gene_id "XLOC_004492"; transcript_name "TCONS_00007618"; gene_biotype "novel"; class_code "u"; transcript_id "TCONS_00007618"; gene_name "XLOC_004492"; transcript_biotype "lincRNA"
NC_000071.7	Novogene	exon	90466818	90479161	.	-	.	nearest_ref "XM_036165629.1"; exon_number "1"; gene_id "81702"; transcript_name "TCONS_00007640"; gene_biotype "protein_coding"; class_code "i"; transcript_id "TCONS_00007640"; gene_name "Ankrd17"; transcript_biotype "sense_intronic"
NC_000071.7	Novogene	exon	90479243	90485158	.	-	.	nearest_ref "XM_036165629.1"; exon_number "2"; gene_id "81702"; transcript_name "TCONS_00007640"; gene_biotype "protein_coding"; class_code "i"; transcript_id "TCONS_00007640"; gene_name "Ankrd17"; transcript_biotype "sense_intronic"
NC_000071.7	Novogene	exon	135928721	135928739	.	-	.	nearest_ref "NM_018871.3"; exon_number "1"; gene_id "22628"; transcript_name "TCONS_00007999"; gene_biotype "protein_coding"; class_code "o"; transcript_id "TCONS_00007999"; gene_name "Ywhag"; transcript_biotype "sense_overlapping"
NC_000071.7	Novogene	exon	135937262	135939750	.	-	.	nearest_ref "NM_018871.3"; exon_number "2"; gene_id "22628"; transcript_name "TCONS_00007999"; gene_biotype "protein_coding"; class_code "o"; transcript_id "TCONS_00007999"; gene_name "Ywhag"; transcript_biotype "sense_overlapping"
NC_000072.7	Novogene	exon	6299254	6315354	.	+	.	nearest_ref "NR_136904.1"; exon_number "1"; gene_id "101056138"; transcript_name "TCONS_00008147"; gene_biotype "lncRNA"; class_code "j"; transcript_id "TCONS_00008147"; gene_name "Gm20619"; transcript_biotype "lincRNA"
NC_000072.7	Novogene	exon	6315872	6315927	.	+	.	nearest_ref "NR_136904.1"; exon_number "2"; gene_id "101056138"; transcript_name "TCONS_00008147"; gene_biotype "lncRNA"; class_code "j"; transcript_id "TCONS_00008147"; gene_name "Gm20619"; transcript_biotype "lincRNA"
NC_000072.7	Novogene	exon	6355543	6355662	.	+	.	nearest_ref "NR_136904.1"; exon_number "3"; gene_id "101056138"; transcript_name "TCONS_00008147"; gene_biotype "lncRNA"; class_code "j"; transcript_id "TCONS_00008147"; gene_name "Gm20619"; transcript_biotype "lincRNA"
NC_000072.7	Novogene	exon	6356897	6357012	.	+	.	nearest_ref "NR_136904.1"; exon_number "4"; gene_id "101056138"; transcript_name "TCONS_00008147"; gene_biotype "lncRNA"; class_code "j"; transcript_id "TCONS_00008147"; gene_name "Gm20619"; transcript_biotype "lincRNA"
NC_000072.7	Novogene	exon	6359044	6359215	.	+	.	nearest_ref "NR_136904.1"; exon_number "5"; gene_id "101056138"; transcript_name "TCONS_00008147"; gene_biotype "lncRNA"; class_code "j"; transcript_id "TCONS_00008147"; gene_name "Gm20619"; transcript_biotype "lincRNA"
NC_000072.7	Novogene	exon	6362450	6363288	.	+	.	nearest_ref "NR_136904.1"; exon_number "6"; gene_id "101056138"; transcript_name "TCONS_00008147"; gene_biotype "lncRNA"; class_code "j"; transcript_id "TCONS_00008147"; gene_name "Gm20619"; transcript_biotype "lincRNA"
NC_000072.7	Novogene	exon	21252454	21252501	.	+	.	nearest_ref "NM_019697.4"; exon_number "1"; gene_id "16508"; transcript_name "TCONS_00008185"; gene_biotype "protein_coding"; class_code "i"; transcript_id "TCONS_00008185"; gene_name "Kcnd2"; transcript_biotype "sense_intronic"
NC_000072.7	Novogene	exon	21252738	21285926	.	+	.	nearest_ref "NM_019697.4"; exon_number "2"; gene_id "16508"; transcript_name "TCONS_00008185"; gene_biotype "protein_coding"; class_code "i"; transcript_id "TCONS_00008185"; gene_name "Kcnd2"; transcript_biotype "sense_intronic"
NC_000072.7	Novogene	exon	86490799	86491050	.	+	.	exon_number "1"; gene_id "XLOC_004982"; transcript_name "TCONS_00008483"; gene_biotype "novel"; class_code "u"; transcript_id "TCONS_00008483"; gene_name "XLOC_004982"; transcript_biotype "lincRNA"
NC_000072.7	Novogene	exon	86493005	86493312	.	+	.	exon_number "2"; gene_id "XLOC_004982"; transcript_name "TCONS_00008483"; gene_biotype "novel"; class_code "u"; transcript_id "TCONS_00008483"; gene_name "XLOC_004982"; transcript_biotype "lincRNA"
NC_000072.7	Novogene	exon	92917563	92917790	.	+	.	nearest_ref "XR_004933721.1"; exon_number "1"; gene_id "105242721"; transcript_name "TCONS_00008549"; gene_biotype "lncRNA"; class_code "j"; transcript_id "TCONS_00008549"; gene_name "Gm38863"; transcript_biotype "lincRNA"
NC_000072.7	Novogene	exon	93084048	93084140	.	+	.	nearest_ref "XR_004933721.1"; exon_number "2"; gene_id "105242721"; transcript_name "TCONS_00008549"; gene_biotype "lncRNA"; class_code "j"; transcript_id "TCONS_00008549"; gene_name "Gm38863"; transcript_biotype "lincRNA"
NC_000072.7	Novogene	exon	93169090	93169184	.	+	.	nearest_ref "XR_004933721.1"; exon_number "3"; gene_id "105242721"; transcript_name "TCONS_00008549"; gene_biotype "lncRNA"; class_code "j"; transcript_id "TCONS_00008549"; gene_name "Gm38863"; transcript_biotype "lincRNA"
NC_000072.7	Novogene	exon	93214955	93215025	.	+	.	nearest_ref "XR_004933721.1"; exon_number "4"; gene_id "105242721"; transcript_name "TCONS_00008549"; gene_biotype "lncRNA"; class_code "j"; transcript_id "TCONS_00008549"; gene_name "Gm38863"; transcript_biotype "lincRNA"
NC_000072.7	Novogene	exon	93215151	93221555	.	+	.	nearest_ref "XR_004933721.1"; exon_number "5"; gene_id "105242721"; transcript_name "TCONS_00008549"; gene_biotype "lncRNA"; class_code "j"; transcript_id "TCONS_00008549"; gene_name "Gm38863"; transcript_biotype "lincRNA"
NC_000072.7	Novogene	exon	97784019	97784248	.	+	.	nearest_ref "XM_030255212.2"; exon_number "1"; gene_id "17342"; transcript_name "TCONS_00008559"; gene_biotype "protein_coding"; class_code "j"; transcript_id "TCONS_00008559"; gene_name "Mitf"; transcript_biotype "others"
NC_000072.7	Novogene	exon	97796263	97828147	.	+	.	nearest_ref "XM_030255212.2"; exon_number "2"; gene_id "17342"; transcript_name "TCONS_00008559"; gene_biotype "protein_coding"; class_code "j"; transcript_id "TCONS_00008559"; gene_name "Mitf"; transcript_biotype "others"
NC_000072.7	Novogene	exon	97784023	97787827	.	+	.	nearest_ref "XM_030255212.2"; exon_number "1"; gene_id "17342"; transcript_name "TCONS_00008562"; gene_biotype "protein_coding"; class_code "o"; transcript_id "TCONS_00008562"; gene_name "Mitf"; transcript_biotype "sense_overlapping"
NC_000072.7	Novogene	exon	97788029	97790132	.	+	.	nearest_ref "XM_030255212.2"; exon_number "2"; gene_id "17342"; transcript_name "TCONS_00008562"; gene_biotype "protein_coding"; class_code "o"; transcript_id "TCONS_00008562"; gene_name "Mitf"; transcript_biotype "sense_overlapping"
NC_000072.7	Novogene	exon	117693310	117693340	.	+	.	nearest_ref "NR_045731.1"; exon_number "1"; gene_id "72263"; transcript_name "TCONS_00008631"; gene_biotype "lncRNA"; class_code "i"; transcript_id "TCONS_00008631"; gene_name "1700030F04Rik"; transcript_biotype "sense_intronic"
NC_000072.7	Novogene	exon	117693397	117694052	.	+	.	nearest_ref "NR_045731.1"; exon_number "2"; gene_id "72263"; transcript_name "TCONS_00008631"; gene_biotype "lncRNA"; class_code "i"; transcript_id "TCONS_00008631"; gene_name "1700030F04Rik"; transcript_biotype "sense_intronic"
NC_000072.7	Novogene	exon	134806785	134807407	.	+	.	nearest_ref "XM_011241329.4"; exon_number "1"; gene_id "232430"; transcript_name "TCONS_00008727"; gene_biotype "protein_coding"; class_code "j"; transcript_id "TCONS_00008727"; gene_name "Crebl2"; transcript_biotype "others"
NC_000072.7	Novogene	exon	134826066	134826190	.	+	.	nearest_ref "XM_011241329.4"; exon_number "2"; gene_id "232430"; transcript_name "TCONS_00008727"; gene_biotype "protein_coding"; class_code "j"; transcript_id "TCONS_00008727"; gene_name "Crebl2"; transcript_biotype "others"
NC_000072.7	Novogene	exon	134828043	134828187	.	+	.	nearest_ref "XM_011241329.4"; exon_number "3"; gene_id "232430"; transcript_name "TCONS_00008727"; gene_biotype "protein_coding"; class_code "j"; transcript_id "TCONS_00008727"; gene_name "Crebl2"; transcript_biotype "others"
NC_000072.7	Novogene	exon	134829241	134829277	.	+	.	nearest_ref "XM_011241329.4"; exon_number "4"; gene_id "232430"; transcript_name "TCONS_00008727"; gene_biotype "protein_coding"; class_code "j"; transcript_id "TCONS_00008727"; gene_name "Crebl2"; transcript_biotype "others"
NC_000072.7	Novogene	exon	134832937	134835891	.	+	.	nearest_ref "XM_011241329.4"; exon_number "5"; gene_id "232430"; transcript_name "TCONS_00008727"; gene_biotype "protein_coding"; class_code "j"; transcript_id "TCONS_00008727"; gene_name "Crebl2"; transcript_biotype "others"
NC_000072.7	Novogene	exon	3330738	3335888	.	-	.	nearest_ref "XR_003956387.2"; exon_number "1"; gene_id "330256"; transcript_name "TCONS_00008810"; gene_biotype "lncRNA"; class_code "j"; transcript_id "TCONS_00008810"; gene_name "Gm20559"; transcript_biotype "lincRNA"
NC_000072.7	Novogene	exon	3345853	3346096	.	-	.	nearest_ref "XR_003956387.2"; exon_number "2"; gene_id "330256"; transcript_name "TCONS_00008810"; gene_biotype "lncRNA"; class_code "j"; transcript_id "TCONS_00008810"; gene_name "Gm20559"; transcript_biotype "lincRNA"
NC_000072.7	Novogene	exon	4505329	4505369	.	-	.	nearest_ref "NM_007743.3"; exon_number "1"; gene_id "12843"; transcript_name "TCONS_00008813"; gene_biotype "protein_coding"; class_code "x"; transcript_id "TCONS_00008813"; gene_name "Col1a2"; transcript_biotype "antisense"
NC_000072.7	Novogene	exon	4505704	4505909	.	-	.	nearest_ref "NM_007743.3"; exon_number "2"; gene_id "12843"; transcript_name "TCONS_00008813"; gene_biotype "protein_coding"; class_code "x"; transcript_id "TCONS_00008813"; gene_name "Col1a2"; transcript_biotype "antisense"
NC_000072.7	Novogene	exon	13867459	13870739	.	-	.	nearest_ref "NM_001352887.1"; exon_number "1"; gene_id "66520"; transcript_name "TCONS_00008835"; gene_biotype "protein_coding"; class_code "j"; transcript_id "TCONS_00008835"; gene_name "2610001J05Rik"; transcript_biotype "others"
NC_000072.7	Novogene	exon	13871055	13871626	.	-	.	nearest_ref "NM_001352887.1"; exon_number "2"; gene_id "66520"; transcript_name "TCONS_00008835"; gene_biotype "protein_coding"; class_code "j"; transcript_id "TCONS_00008835"; gene_name "2610001J05Rik"; transcript_biotype "others"
NC_000072.7	Novogene	exon	13881272	13881506	.	-	.	nearest_ref "NM_001352887.1"; exon_number "3"; gene_id "66520"; transcript_name "TCONS_00008835"; gene_biotype "protein_coding"; class_code "j"; transcript_id "TCONS_00008835"; gene_name "2610001J05Rik"; transcript_biotype "others"
NC_000072.7	Novogene	exon	31053451	31070530	.	-	.	nearest_ref "NR_110469.1"; exon_number "1"; gene_id "232685"; transcript_name "TCONS_00008875"; gene_biotype "lncRNA"; class_code "j"; transcript_id "TCONS_00008875"; gene_name "Lncpint"; transcript_biotype "lincRNA"
NC_000072.7	Novogene	exon	31116664	31116721	.	-	.	nearest_ref "NR_110469.1"; exon_number "2"; gene_id "232685"; transcript_name "TCONS_00008875"; gene_biotype "lncRNA"; class_code "j"; transcript_id "TCONS_00008875"; gene_name "Lncpint"; transcript_biotype "lincRNA"
NC_000072.7	Novogene	exon	31143411	31143570	.	-	.	nearest_ref "NR_110469.1"; exon_number "3"; gene_id "232685"; transcript_name "TCONS_00008875"; gene_biotype "lncRNA"; class_code "j"; transcript_id "TCONS_00008875"; gene_name "Lncpint"; transcript_biotype "lincRNA"
NC_000072.7	Novogene	exon	31157957	31158084	.	-	.	nearest_ref "NR_110469.1"; exon_number "4"; gene_id "232685"; transcript_name "TCONS_00008875"; gene_biotype "lncRNA"; class_code "j"; transcript_id "TCONS_00008875"; gene_name "Lncpint"; transcript_biotype "lincRNA"
NC_000072.7	Novogene	exon	31174715	31174786	.	-	.	nearest_ref "NR_110469.1"; exon_number "5"; gene_id "232685"; transcript_name "TCONS_00008875"; gene_biotype "lncRNA"; class_code "j"; transcript_id "TCONS_00008875"; gene_name "Lncpint"; transcript_biotype "lincRNA"
NC_000072.7	Novogene	exon	31194373	31195409	.	-	.	nearest_ref "NR_110469.1"; exon_number "6"; gene_id "232685"; transcript_name "TCONS_00008875"; gene_biotype "lncRNA"; class_code "j"; transcript_id "TCONS_00008875"; gene_name "Lncpint"; transcript_biotype "lincRNA"
NC_000072.7	Novogene	exon	31053451	31070530	.	-	.	nearest_ref "NR_110469.1"; exon_number "1"; gene_id "232685"; transcript_name "TCONS_00008873"; gene_biotype "lncRNA"; class_code "j"; transcript_id "TCONS_00008873"; gene_name "Lncpint"; transcript_biotype "lincRNA"
NC_000072.7	Novogene	exon	31116664	31116721	.	-	.	nearest_ref "NR_110469.1"; exon_number "2"; gene_id "232685"; transcript_name "TCONS_00008873"; gene_biotype "lncRNA"; class_code "j"; transcript_id "TCONS_00008873"; gene_name "Lncpint"; transcript_biotype "lincRNA"
NC_000072.7	Novogene	exon	31143411	31143570	.	-	.	nearest_ref "NR_110469.1"; exon_number "3"; gene_id "232685"; transcript_name "TCONS_00008873"; gene_biotype "lncRNA"; class_code "j"; transcript_id "TCONS_00008873"; gene_name "Lncpint"; transcript_biotype "lincRNA"
NC_000072.7	Novogene	exon	31157957	31158084	.	-	.	nearest_ref "NR_110469.1"; exon_number "4"; gene_id "232685"; transcript_name "TCONS_00008873"; gene_biotype "lncRNA"; class_code "j"; transcript_id "TCONS_00008873"; gene_name "Lncpint"; transcript_biotype "lincRNA"
NC_000072.7	Novogene	exon	31174715	31174786	.	-	.	nearest_ref "NR_110469.1"; exon_number "5"; gene_id "232685"; transcript_name "TCONS_00008873"; gene_biotype "lncRNA"; class_code "j"; transcript_id "TCONS_00008873"; gene_name "Lncpint"; transcript_biotype "lincRNA"
NC_000072.7	Novogene	exon	31195009	31195409	.	-	.	nearest_ref "NR_110469.1"; exon_number "6"; gene_id "232685"; transcript_name "TCONS_00008873"; gene_biotype "lncRNA"; class_code "j"; transcript_id "TCONS_00008873"; gene_name "Lncpint"; transcript_biotype "lincRNA"
NC_000072.7	Novogene	exon	31061763	31070530	.	-	.	nearest_ref "NR_110469.1"; exon_number "1"; gene_id "232685"; transcript_name "TCONS_00008877"; gene_biotype "lncRNA"; class_code "j"; transcript_id "TCONS_00008877"; gene_name "Lncpint"; transcript_biotype "lincRNA"
NC_000072.7	Novogene	exon	31116664	31116721	.	-	.	nearest_ref "NR_110469.1"; exon_number "2"; gene_id "232685"; transcript_name "TCONS_00008877"; gene_biotype "lncRNA"; class_code "j"; transcript_id "TCONS_00008877"; gene_name "Lncpint"; transcript_biotype "lincRNA"
NC_000072.7	Novogene	exon	31143411	31143573	.	-	.	nearest_ref "NR_110469.1"; exon_number "3"; gene_id "232685"; transcript_name "TCONS_00008877"; gene_biotype "lncRNA"; class_code "j"; transcript_id "TCONS_00008877"; gene_name "Lncpint"; transcript_biotype "lincRNA"
NC_000072.7	Novogene	exon	31157957	31195409	.	-	.	nearest_ref "NR_110469.1"; exon_number "4"; gene_id "232685"; transcript_name "TCONS_00008877"; gene_biotype "lncRNA"; class_code "j"; transcript_id "TCONS_00008877"; gene_name "Lncpint"; transcript_biotype "lincRNA"
NC_000072.7	Novogene	exon	86489610	86491050	.	-	.	exon_number "1"; gene_id "XLOC_005368"; transcript_name "TCONS_00009085"; gene_biotype "novel"; class_code "u"; transcript_id "TCONS_00009085"; gene_name "XLOC_005368"; transcript_biotype "lincRNA"
NC_000072.7	Novogene	exon	86493005	86493294	.	-	.	exon_number "2"; gene_id "XLOC_005368"; transcript_name "TCONS_00009085"; gene_biotype "novel"; class_code "u"; transcript_id "TCONS_00009085"; gene_name "XLOC_005368"; transcript_biotype "lincRNA"
NC_000072.7	Novogene	exon	101205008	101229539	.	-	.	nearest_ref "NM_018884.2"; exon_number "1"; gene_id "55983"; transcript_name "TCONS_00009166"; gene_biotype "protein_coding"; class_code "j"; transcript_id "TCONS_00009166"; gene_name "Pdzrn3"; transcript_biotype "others"
NC_000072.7	Novogene	exon	101331355	101331986	.	-	.	nearest_ref "NM_018884.2"; exon_number "2"; gene_id "55983"; transcript_name "TCONS_00009166"; gene_biotype "protein_coding"; class_code "j"; transcript_id "TCONS_00009166"; gene_name "Pdzrn3"; transcript_biotype "others"
NC_000072.7	Novogene	exon	101288227	101298234	.	-	.	nearest_ref "NM_018884.2"; exon_number "1"; gene_id "55983"; transcript_name "TCONS_00009168"; gene_biotype "protein_coding"; class_code "i"; transcript_id "TCONS_00009168"; gene_name "Pdzrn3"; transcript_biotype "sense_intronic"
NC_000072.7	Novogene	exon	101298351	101301321	.	-	.	nearest_ref "NM_018884.2"; exon_number "2"; gene_id "55983"; transcript_name "TCONS_00009168"; gene_biotype "protein_coding"; class_code "i"; transcript_id "TCONS_00009168"; gene_name "Pdzrn3"; transcript_biotype "sense_intronic"
NC_000072.7	Novogene	exon	101294755	101301292	.	-	.	nearest_ref "NM_018884.2"; exon_number "1"; gene_id "55983"; transcript_name "TCONS_00009170"; gene_biotype "protein_coding"; class_code "i"; transcript_id "TCONS_00009170"; gene_name "Pdzrn3"; transcript_biotype "sense_intronic"
NC_000072.7	Novogene	exon	101301433	101303916	.	-	.	nearest_ref "NM_018884.2"; exon_number "2"; gene_id "55983"; transcript_name "TCONS_00009170"; gene_biotype "protein_coding"; class_code "i"; transcript_id "TCONS_00009170"; gene_name "Pdzrn3"; transcript_biotype "sense_intronic"
NC_000072.7	Novogene	exon	117693313	117693360	.	-	.	nearest_ref "NR_045731.1"; exon_number "1"; gene_id "72263"; transcript_name "TCONS_00009217"; gene_biotype "lncRNA"; class_code "i"; transcript_id "TCONS_00009217"; gene_name "1700030F04Rik"; transcript_biotype "sense_intronic"
NC_000072.7	Novogene	exon	117693398	117694028	.	-	.	nearest_ref "NR_045731.1"; exon_number "2"; gene_id "72263"; transcript_name "TCONS_00009217"; gene_biotype "lncRNA"; class_code "i"; transcript_id "TCONS_00009217"; gene_name "1700030F04Rik"; transcript_biotype "sense_intronic"
NC_000072.7	Novogene	exon	119085657	119096336	.	-	.	nearest_ref "XM_036165769.1"; exon_number "1"; gene_id "12288"; transcript_name "TCONS_00009250"; gene_biotype "protein_coding"; class_code "i"; transcript_id "TCONS_00009250"; gene_name "Cacna1c"; transcript_biotype "sense_intronic"
NC_000072.7	Novogene	exon	119096364	119097713	.	-	.	nearest_ref "XM_036165769.1"; exon_number "2"; gene_id "12288"; transcript_name "TCONS_00009250"; gene_biotype "protein_coding"; class_code "i"; transcript_id "TCONS_00009250"; gene_name "Cacna1c"; transcript_biotype "sense_intronic"
NC_000072.7	Novogene	exon	145127928	145128095	.	-	.	nearest_ref "XM_011241590.1"; exon_number "1"; gene_id "320662"; transcript_name "TCONS_00009392"; gene_biotype "protein_coding"; class_code "o"; transcript_id "TCONS_00009392"; gene_name "Casc1"; transcript_biotype "sense_overlapping"
NC_000072.7	Novogene	exon	145133091	145133809	.	-	.	nearest_ref "XM_011241590.1"; exon_number "2"; gene_id "320662"; transcript_name "TCONS_00009392"; gene_biotype "protein_coding"; class_code "o"; transcript_id "TCONS_00009392"; gene_name "Casc1"; transcript_biotype "sense_overlapping"
NC_000073.7	Novogene	exon	30429011	30429279	.	+	.	nearest_ref "XM_006540028.3"; exon_number "1"; gene_id "282619"; transcript_name "TCONS_00009671"; gene_biotype "protein_coding"; class_code "j"; transcript_id "TCONS_00009671"; gene_name "Sbsn"; transcript_biotype "others"
NC_000073.7	Novogene	exon	30431839	30432186	.	+	.	nearest_ref "XM_006540028.3"; exon_number "2"; gene_id "282619"; transcript_name "TCONS_00009671"; gene_biotype "protein_coding"; class_code "j"; transcript_id "TCONS_00009671"; gene_name "Sbsn"; transcript_biotype "others"
NC_000073.7	Novogene	exon	30434129	30434193	.	+	.	nearest_ref "XM_006540028.3"; exon_number "3"; gene_id "282619"; transcript_name "TCONS_00009671"; gene_biotype "protein_coding"; class_code "j"; transcript_id "TCONS_00009671"; gene_name "Sbsn"; transcript_biotype "others"
NC_000073.7	Novogene	exon	30435241	30437245	.	+	.	nearest_ref "XM_006540028.3"; exon_number "4"; gene_id "282619"; transcript_name "TCONS_00009671"; gene_biotype "protein_coding"; class_code "j"; transcript_id "TCONS_00009671"; gene_name "Sbsn"; transcript_biotype "others"
NC_000073.7	Novogene	exon	30437426	30438334	.	+	.	nearest_ref "NM_001290631.1"; exon_number "1"; gene_id "14447"; transcript_name "TCONS_00009672"; gene_biotype "protein_coding"; class_code "x"; transcript_id "TCONS_00009672"; gene_name "Gapdhs"; transcript_biotype "antisense"
NC_000073.7	Novogene	exon	30442627	30444036	.	+	.	nearest_ref "NM_001290631.1"; exon_number "2"; gene_id "14447"; transcript_name "TCONS_00009672"; gene_biotype "protein_coding"; class_code "x"; transcript_id "TCONS_00009672"; gene_name "Gapdhs"; transcript_biotype "antisense"
NC_000073.7	Novogene	exon	44122853	44123119	.	+	.	nearest_ref "NR_131001.1"; exon_number "1"; gene_id "71368"; transcript_name "TCONS_00009703"; gene_biotype "lncRNA"; class_code "j"; transcript_id "TCONS_00009703"; gene_name "5430431A17Rik"; transcript_biotype "lincRNA"
NC_000073.7	Novogene	exon	44134032	44134411	.	+	.	nearest_ref "NR_131001.1"; exon_number "2"; gene_id "71368"; transcript_name "TCONS_00009703"; gene_biotype "lncRNA"; class_code "j"; transcript_id "TCONS_00009703"; gene_name "5430431A17Rik"; transcript_biotype "lincRNA"
NC_000073.7	Novogene	exon	44134514	44134837	.	+	.	nearest_ref "NR_131001.1"; exon_number "3"; gene_id "71368"; transcript_name "TCONS_00009703"; gene_biotype "lncRNA"; class_code "j"; transcript_id "TCONS_00009703"; gene_name "5430431A17Rik"; transcript_biotype "lincRNA"
NC_000073.7	Novogene	exon	44131440	44134413	.	+	.	nearest_ref "NR_131001.1"; exon_number "1"; gene_id "71368"; transcript_name "TCONS_00009704"; gene_biotype "lncRNA"; class_code "o"; transcript_id "TCONS_00009704"; gene_name "5430431A17Rik"; transcript_biotype "sense_overlapping"
NC_000073.7	Novogene	exon	44134517	44134837	.	+	.	nearest_ref "NR_131001.1"; exon_number "2"; gene_id "71368"; transcript_name "TCONS_00009704"; gene_biotype "lncRNA"; class_code "o"; transcript_id "TCONS_00009704"; gene_name "5430431A17Rik"; transcript_biotype "sense_overlapping"
NC_000073.7	Novogene	exon	44131441	44133291	.	+	.	nearest_ref "NR_131001.1"; exon_number "1"; gene_id "71368"; transcript_name "TCONS_00009705"; gene_biotype "lncRNA"; class_code "j"; transcript_id "TCONS_00009705"; gene_name "5430431A17Rik"; transcript_biotype "lincRNA"
NC_000073.7	Novogene	exon	44133433	44133681	.	+	.	nearest_ref "NR_131001.1"; exon_number "2"; gene_id "71368"; transcript_name "TCONS_00009705"; gene_biotype "lncRNA"; class_code "j"; transcript_id "TCONS_00009705"; gene_name "5430431A17Rik"; transcript_biotype "lincRNA"
NC_000073.7	Novogene	exon	44133718	44134411	.	+	.	nearest_ref "NR_131001.1"; exon_number "3"; gene_id "71368"; transcript_name "TCONS_00009705"; gene_biotype "lncRNA"; class_code "j"; transcript_id "TCONS_00009705"; gene_name "5430431A17Rik"; transcript_biotype "lincRNA"
NC_000073.7	Novogene	exon	44134514	44134837	.	+	.	nearest_ref "NR_131001.1"; exon_number "4"; gene_id "71368"; transcript_name "TCONS_00009705"; gene_biotype "lncRNA"; class_code "j"; transcript_id "TCONS_00009705"; gene_name "5430431A17Rik"; transcript_biotype "lincRNA"
NC_000073.7	Novogene	exon	67137685	67140665	.	+	.	nearest_ref "XR_004934432.1"; exon_number "1"; gene_id "102637206"; transcript_name "TCONS_00009813"; gene_biotype "lncRNA"; class_code "o"; transcript_id "TCONS_00009813"; gene_name "Gm34079"; transcript_biotype "sense_overlapping"
NC_000073.7	Novogene	exon	67156590	67162797	.	+	.	nearest_ref "XR_004934432.1"; exon_number "2"; gene_id "102637206"; transcript_name "TCONS_00009813"; gene_biotype "lncRNA"; class_code "o"; transcript_id "TCONS_00009813"; gene_name "Gm34079"; transcript_biotype "sense_overlapping"
NC_000073.7	Novogene	exon	75139470	75141697	.	+	.	nearest_ref "XM_036153520.1"; exon_number "1"; gene_id "75547"; transcript_name "TCONS_00009830"; gene_biotype "protein_coding"; class_code "o"; transcript_id "TCONS_00009830"; gene_name "Akap13"; transcript_biotype "sense_overlapping"
NC_000073.7	Novogene	exon	75185817	75191021	.	+	.	nearest_ref "XM_036153520.1"; exon_number "2"; gene_id "75547"; transcript_name "TCONS_00009830"; gene_biotype "protein_coding"; class_code "o"; transcript_id "TCONS_00009830"; gene_name "Akap13"; transcript_biotype "sense_overlapping"
NC_000073.7	Novogene	exon	98851594	98856534	.	+	.	exon_number "1"; gene_id "XLOC_005901"; transcript_name "TCONS_00009934"; gene_biotype "novel"; class_code "u"; transcript_id "TCONS_00009934"; gene_name "XLOC_005901"; transcript_biotype "lincRNA"
NC_000073.7	Novogene	exon	98857440	98862689	.	+	.	exon_number "2"; gene_id "XLOC_005901"; transcript_name "TCONS_00009934"; gene_biotype "novel"; class_code "u"; transcript_id "TCONS_00009934"; gene_name "XLOC_005901"; transcript_biotype "lincRNA"
NC_000073.7	Novogene	exon	112027129	112027307	.	+	.	nearest_ref "XM_006508051.1"; exon_number "1"; gene_id "57342"; transcript_name "TCONS_00010044"; gene_biotype "protein_coding"; class_code "j"; transcript_id "TCONS_00010044"; gene_name "Parva"; transcript_biotype "others"
NC_000073.7	Novogene	exon	112063470	112072898	.	+	.	nearest_ref "XM_006508051.1"; exon_number "2"; gene_id "57342"; transcript_name "TCONS_00010044"; gene_biotype "protein_coding"; class_code "j"; transcript_id "TCONS_00010044"; gene_name "Parva"; transcript_biotype "others"
NC_000073.7	Novogene	exon	25161135	25162805	.	-	.	nearest_ref "NM_001113368.1"; exon_number "1"; gene_id "26367"; transcript_name "TCONS_00010434"; gene_biotype "protein_coding"; class_code "o"; transcript_id "TCONS_00010434"; gene_name "Ceacam2"; transcript_biotype "sense_overlapping"
NC_000073.7	Novogene	exon	25217107	25217135	.	-	.	nearest_ref "NM_001113368.1"; exon_number "2"; gene_id "26367"; transcript_name "TCONS_00010434"; gene_biotype "protein_coding"; class_code "o"; transcript_id "TCONS_00010434"; gene_name "Ceacam2"; transcript_biotype "sense_overlapping"
NC_000073.7	Novogene	exon	33985811	33989082	.	-	.	nearest_ref "XM_006539899.5"; exon_number "1"; gene_id "233103"; transcript_name "TCONS_00010546"; gene_biotype "protein_coding"; class_code "o"; transcript_id "TCONS_00010546"; gene_name "Garre1"; transcript_biotype "sense_overlapping"
NC_000073.7	Novogene	exon	33989796	34005123	.	-	.	nearest_ref "XM_006539899.5"; exon_number "2"; gene_id "233103"; transcript_name "TCONS_00010546"; gene_biotype "protein_coding"; class_code "o"; transcript_id "TCONS_00010546"; gene_name "Garre1"; transcript_biotype "sense_overlapping"
NC_000073.7	Novogene	exon	54061645	54062011	.	-	.	exon_number "1"; gene_id "XLOC_006332"; transcript_name "TCONS_00010666"; gene_biotype "novel"; class_code "u"; transcript_id "TCONS_00010666"; gene_name "XLOC_006332"; transcript_biotype "lincRNA"
NC_000073.7	Novogene	exon	54062128	54062272	.	-	.	exon_number "2"; gene_id "XLOC_006332"; transcript_name "TCONS_00010666"; gene_biotype "novel"; class_code "u"; transcript_id "TCONS_00010666"; gene_name "XLOC_006332"; transcript_biotype "lincRNA"
NC_000073.7	Novogene	exon	89774042	89774240	.	-	.	nearest_ref "NR_046006.1"; exon_number "1"; gene_id "78329"; transcript_name "TCONS_00010799"; gene_biotype "lncRNA"; class_code "j"; transcript_id "TCONS_00010799"; gene_name "2310010J17Rik"; transcript_biotype "lincRNA"
NC_000073.7	Novogene	exon	89779080	89779366	.	-	.	nearest_ref "NR_046006.1"; exon_number "2"; gene_id "78329"; transcript_name "TCONS_00010799"; gene_biotype "lncRNA"; class_code "j"; transcript_id "TCONS_00010799"; gene_name "2310010J17Rik"; transcript_biotype "lincRNA"
NC_000073.7	Novogene	exon	92370542	92375241	.	-	.	nearest_ref "NR_015510.1"; exon_number "1"; gene_id "666737"; transcript_name "TCONS_00010808"; gene_biotype "lncRNA"; class_code "o"; transcript_id "TCONS_00010808"; gene_name "4632427E13Rik"; transcript_biotype "sense_overlapping"
NC_000073.7	Novogene	exon	92383377	92390664	.	-	.	nearest_ref "NR_015510.1"; exon_number "2"; gene_id "666737"; transcript_name "TCONS_00010808"; gene_biotype "lncRNA"; class_code "o"; transcript_id "TCONS_00010808"; gene_name "4632427E13Rik"; transcript_biotype "sense_overlapping"
NC_000073.7	Novogene	exon	105544569	105545224	.	-	.	nearest_ref "NM_029000.3"; exon_number "1"; gene_id "74558"; transcript_name "TCONS_00010899"; gene_biotype "protein_coding"; class_code "o"; transcript_id "TCONS_00010899"; gene_name "Gvin1"; transcript_biotype "sense_overlapping"
NC_000073.7	Novogene	exon	105922079	105922199	.	-	.	nearest_ref "NM_029000.3"; exon_number "2"; gene_id "74558"; transcript_name "TCONS_00010899"; gene_biotype "protein_coding"; class_code "o"; transcript_id "TCONS_00010899"; gene_name "Gvin1"; transcript_biotype "sense_overlapping"
NC_000073.7	Novogene	exon	105755986	105756641	.	-	.	nearest_ref "NM_029000.3"; exon_number "1"; gene_id "74558"; transcript_name "TCONS_00010908"; gene_biotype "protein_coding"; class_code "o"; transcript_id "TCONS_00010908"; gene_name "Gvin1"; transcript_biotype "sense_overlapping"
NC_000073.7	Novogene	exon	105922079	105922199	.	-	.	nearest_ref "NM_029000.3"; exon_number "2"; gene_id "74558"; transcript_name "TCONS_00010908"; gene_biotype "protein_coding"; class_code "o"; transcript_id "TCONS_00010908"; gene_name "Gvin1"; transcript_biotype "sense_overlapping"
NC_000074.7	Novogene	exon	19748144	19748731	.	+	.	nearest_ref "NM_001039553.2"; exon_number "1"; gene_id "626415"; transcript_name "TCONS_00011260"; gene_biotype "protein_coding"; class_code "o"; transcript_id "TCONS_00011260"; gene_name "4930467E23Rik"; transcript_biotype "sense_overlapping"
NC_000074.7	Novogene	exon	20174259	20174661	.	+	.	nearest_ref "NM_001039553.2"; exon_number "2"; gene_id "626415"; transcript_name "TCONS_00011260"; gene_biotype "protein_coding"; class_code "o"; transcript_id "TCONS_00011260"; gene_name "4930467E23Rik"; transcript_biotype "sense_overlapping"
NC_000074.7	Novogene	exon	19748166	19749161	.	+	.	exon_number "1"; gene_id "XLOC_006681"; transcript_name "TCONS_00011261"; gene_biotype "novel"; class_code "u"; transcript_id "TCONS_00011261"; gene_name "XLOC_006681"; transcript_biotype "lincRNA"
NC_000074.7	Novogene	exon	19749183	19749759	.	+	.	exon_number "2"; gene_id "XLOC_006681"; transcript_name "TCONS_00011261"; gene_biotype "novel"; class_code "u"; transcript_id "TCONS_00011261"; gene_name "XLOC_006681"; transcript_biotype "lincRNA"
NC_000074.7	Novogene	exon	19751974	19753725	.	+	.	nearest_ref "NM_001039553.2"; exon_number "1"; gene_id "626415"; transcript_name "TCONS_00011262"; gene_biotype "protein_coding"; class_code "o"; transcript_id "TCONS_00011262"; gene_name "4930467E23Rik"; transcript_biotype "sense_overlapping"
NC_000074.7	Novogene	exon	20052331	20052430	.	+	.	nearest_ref "NM_001039553.2"; exon_number "2"; gene_id "626415"; transcript_name "TCONS_00011262"; gene_biotype "protein_coding"; class_code "o"; transcript_id "TCONS_00011262"; gene_name "4930467E23Rik"; transcript_biotype "sense_overlapping"
NC_000074.7	Novogene	exon	20036278	20037037	.	+	.	nearest_ref "NM_001177408.1"; exon_number "1"; gene_id "100040599"; transcript_name "TCONS_00011267"; gene_biotype "protein_coding"; class_code "o"; transcript_id "TCONS_00011267"; gene_name "Gm15319"; transcript_biotype "sense_overlapping"
NC_000074.7	Novogene	exon	20164287	20164664	.	+	.	nearest_ref "NM_001177408.1"; exon_number "2"; gene_id "100040599"; transcript_name "TCONS_00011267"; gene_biotype "protein_coding"; class_code "o"; transcript_id "TCONS_00011267"; gene_name "Gm15319"; transcript_biotype "sense_overlapping"
NC_000074.7	Novogene	exon	20047477	20048642	.	+	.	nearest_ref "NM_001177408.1"; exon_number "1"; gene_id "100040599"; transcript_name "TCONS_00011268"; gene_biotype "protein_coding"; class_code "o"; transcript_id "TCONS_00011268"; gene_name "Gm15319"; transcript_biotype "sense_overlapping"
NC_000074.7	Novogene	exon	20175932	20176591	.	+	.	nearest_ref "NM_001177408.1"; exon_number "2"; gene_id "100040599"; transcript_name "TCONS_00011268"; gene_biotype "protein_coding"; class_code "o"; transcript_id "TCONS_00011268"; gene_name "Gm15319"; transcript_biotype "sense_overlapping"
NC_000074.7	Novogene	exon	26097324	26102879	.	+	.	nearest_ref "NM_001001735.2"; exon_number "1"; gene_id "234135"; transcript_name "TCONS_00011302"; gene_biotype "protein_coding"; class_code "i"; transcript_id "TCONS_00011302"; gene_name "Nsd3"; transcript_biotype "sense_intronic"
NC_000074.7	Novogene	exon	26119066	26119101	.	+	.	nearest_ref "NM_001001735.2"; exon_number "2"; gene_id "234135"; transcript_name "TCONS_00011302"; gene_biotype "protein_coding"; class_code "i"; transcript_id "TCONS_00011302"; gene_name "Nsd3"; transcript_biotype "sense_intronic"
NC_000074.7	Novogene	exon	40577688	40578008	.	+	.	exon_number "1"; gene_id "XLOC_006731"; transcript_name "TCONS_00011347"; gene_biotype "novel"; class_code "u"; transcript_id "TCONS_00011347"; gene_name "XLOC_006731"; transcript_biotype "lincRNA"
NC_000074.7	Novogene	exon	40598333	40598728	.	+	.	exon_number "2"; gene_id "XLOC_006731"; transcript_name "TCONS_00011347"; gene_biotype "novel"; class_code "u"; transcript_id "TCONS_00011347"; gene_name "XLOC_006731"; transcript_biotype "lincRNA"
NC_000074.7	Novogene	exon	46080788	46081309	.	+	.	nearest_ref "XM_036153900.1"; exon_number "1"; gene_id "234214"; transcript_name "TCONS_00011360"; gene_biotype "protein_coding"; class_code "j"; transcript_id "TCONS_00011360"; gene_name "Sorbs2"; transcript_biotype "others"
NC_000074.7	Novogene	exon	46111840	46111978	.	+	.	nearest_ref "XM_036153900.1"; exon_number "2"; gene_id "234214"; transcript_name "TCONS_00011360"; gene_biotype "protein_coding"; class_code "j"; transcript_id "TCONS_00011360"; gene_name "Sorbs2"; transcript_biotype "others"
NC_000074.7	Novogene	exon	46189190	46189239	.	+	.	nearest_ref "XM_036153900.1"; exon_number "3"; gene_id "234214"; transcript_name "TCONS_00011360"; gene_biotype "protein_coding"; class_code "j"; transcript_id "TCONS_00011360"; gene_name "Sorbs2"; transcript_biotype "others"
NC_000074.7	Novogene	exon	46191442	46198878	.	+	.	nearest_ref "XM_036153900.1"; exon_number "4"; gene_id "234214"; transcript_name "TCONS_00011360"; gene_biotype "protein_coding"; class_code "j"; transcript_id "TCONS_00011360"; gene_name "Sorbs2"; transcript_biotype "others"
NC_000074.7	Novogene	exon	46199592	46202552	.	+	.	nearest_ref "XM_036153900.1"; exon_number "5"; gene_id "234214"; transcript_name "TCONS_00011360"; gene_biotype "protein_coding"; class_code "j"; transcript_id "TCONS_00011360"; gene_name "Sorbs2"; transcript_biotype "others"
NC_000074.7	Novogene	exon	73302290	73303175	.	+	.	exon_number "1"; gene_id "XLOC_006824"; transcript_name "TCONS_00011509"; gene_biotype "novel"; class_code "u"; transcript_id "TCONS_00011509"; gene_name "XLOC_006824"; transcript_biotype "lincRNA"
NC_000074.7	Novogene	exon	73303776	73313908	.	+	.	exon_number "2"; gene_id "XLOC_006824"; transcript_name "TCONS_00011509"; gene_biotype "novel"; class_code "u"; transcript_id "TCONS_00011509"; gene_name "XLOC_006824"; transcript_biotype "lincRNA"
NC_000074.7	Novogene	exon	84301157	84302945	.	+	.	nearest_ref "XR_003947411.2"; exon_number "1"; gene_id "105246804"; transcript_name "TCONS_00011544"; gene_biotype "lncRNA"; class_code "j"; transcript_id "TCONS_00011544"; gene_name "D830024N08Rik"; transcript_biotype "lincRNA"
NC_000074.7	Novogene	exon	84309923	84310044	.	+	.	nearest_ref "XR_003947411.2"; exon_number "2"; gene_id "105246804"; transcript_name "TCONS_00011544"; gene_biotype "lncRNA"; class_code "j"; transcript_id "TCONS_00011544"; gene_name "D830024N08Rik"; transcript_biotype "lincRNA"
NC_000074.7	Novogene	exon	84317289	84317459	.	+	.	nearest_ref "XR_003947411.2"; exon_number "3"; gene_id "105246804"; transcript_name "TCONS_00011544"; gene_biotype "lncRNA"; class_code "j"; transcript_id "TCONS_00011544"; gene_name "D830024N08Rik"; transcript_biotype "lincRNA"
NC_000074.7	Novogene	exon	84319003	84323897	.	+	.	nearest_ref "XR_003947411.2"; exon_number "4"; gene_id "105246804"; transcript_name "TCONS_00011544"; gene_biotype "lncRNA"; class_code "j"; transcript_id "TCONS_00011544"; gene_name "D830024N08Rik"; transcript_biotype "lincRNA"
NC_000074.7	Novogene	exon	84302657	84302945	.	+	.	nearest_ref "XR_003947411.2"; exon_number "1"; gene_id "105246804"; transcript_name "TCONS_00011545"; gene_biotype "lncRNA"; class_code "j"; transcript_id "TCONS_00011545"; gene_name "D830024N08Rik"; transcript_biotype "lincRNA"
NC_000074.7	Novogene	exon	84309923	84310044	.	+	.	nearest_ref "XR_003947411.2"; exon_number "2"; gene_id "105246804"; transcript_name "TCONS_00011545"; gene_biotype "lncRNA"; class_code "j"; transcript_id "TCONS_00011545"; gene_name "D830024N08Rik"; transcript_biotype "lincRNA"
NC_000074.7	Novogene	exon	84323617	84323909	.	+	.	nearest_ref "XR_003947411.2"; exon_number "3"; gene_id "105246804"; transcript_name "TCONS_00011545"; gene_biotype "lncRNA"; class_code "j"; transcript_id "TCONS_00011545"; gene_name "D830024N08Rik"; transcript_biotype "lincRNA"
NC_000074.7	Novogene	exon	84302681	84302945	.	+	.	nearest_ref "XR_003947411.2"; exon_number "1"; gene_id "105246804"; transcript_name "TCONS_00011548"; gene_biotype "lncRNA"; class_code "j"; transcript_id "TCONS_00011548"; gene_name "D830024N08Rik"; transcript_biotype "lincRNA"
NC_000074.7	Novogene	exon	84309923	84310044	.	+	.	nearest_ref "XR_003947411.2"; exon_number "2"; gene_id "105246804"; transcript_name "TCONS_00011548"; gene_biotype "lncRNA"; class_code "j"; transcript_id "TCONS_00011548"; gene_name "D830024N08Rik"; transcript_biotype "lincRNA"
NC_000074.7	Novogene	exon	84317289	84317459	.	+	.	nearest_ref "XR_003947411.2"; exon_number "3"; gene_id "105246804"; transcript_name "TCONS_00011548"; gene_biotype "lncRNA"; class_code "j"; transcript_id "TCONS_00011548"; gene_name "D830024N08Rik"; transcript_biotype "lincRNA"
NC_000074.7	Novogene	exon	84318999	84322848	.	+	.	nearest_ref "XR_003947411.2"; exon_number "4"; gene_id "105246804"; transcript_name "TCONS_00011548"; gene_biotype "lncRNA"; class_code "j"; transcript_id "TCONS_00011548"; gene_name "D830024N08Rik"; transcript_biotype "lincRNA"
NC_000074.7	Novogene	exon	84302681	84302945	.	+	.	nearest_ref "XR_003947411.2"; exon_number "1"; gene_id "105246804"; transcript_name "TCONS_00011547"; gene_biotype "lncRNA"; class_code "j"; transcript_id "TCONS_00011547"; gene_name "D830024N08Rik"; transcript_biotype "lincRNA"
NC_000074.7	Novogene	exon	84309029	84309100	.	+	.	nearest_ref "XR_003947411.2"; exon_number "2"; gene_id "105246804"; transcript_name "TCONS_00011547"; gene_biotype "lncRNA"; class_code "j"; transcript_id "TCONS_00011547"; gene_name "D830024N08Rik"; transcript_biotype "lincRNA"
NC_000074.7	Novogene	exon	84309923	84310044	.	+	.	nearest_ref "XR_003947411.2"; exon_number "3"; gene_id "105246804"; transcript_name "TCONS_00011547"; gene_biotype "lncRNA"; class_code "j"; transcript_id "TCONS_00011547"; gene_name "D830024N08Rik"; transcript_biotype "lincRNA"
NC_000074.7	Novogene	exon	84317289	84322848	.	+	.	nearest_ref "XR_003947411.2"; exon_number "4"; gene_id "105246804"; transcript_name "TCONS_00011547"; gene_biotype "lncRNA"; class_code "j"; transcript_id "TCONS_00011547"; gene_name "D830024N08Rik"; transcript_biotype "lincRNA"
NC_000074.7	Novogene	exon	84302681	84302945	.	+	.	nearest_ref "XR_003947411.2"; exon_number "1"; gene_id "105246804"; transcript_name "TCONS_00011546"; gene_biotype "lncRNA"; class_code "j"; transcript_id "TCONS_00011546"; gene_name "D830024N08Rik"; transcript_biotype "lincRNA"
NC_000074.7	Novogene	exon	84308909	84309100	.	+	.	nearest_ref "XR_003947411.2"; exon_number "2"; gene_id "105246804"; transcript_name "TCONS_00011546"; gene_biotype "lncRNA"; class_code "j"; transcript_id "TCONS_00011546"; gene_name "D830024N08Rik"; transcript_biotype "lincRNA"
NC_000074.7	Novogene	exon	84309923	84310044	.	+	.	nearest_ref "XR_003947411.2"; exon_number "3"; gene_id "105246804"; transcript_name "TCONS_00011546"; gene_biotype "lncRNA"; class_code "j"; transcript_id "TCONS_00011546"; gene_name "D830024N08Rik"; transcript_biotype "lincRNA"
NC_000074.7	Novogene	exon	84317289	84317459	.	+	.	nearest_ref "XR_003947411.2"; exon_number "4"; gene_id "105246804"; transcript_name "TCONS_00011546"; gene_biotype "lncRNA"; class_code "j"; transcript_id "TCONS_00011546"; gene_name "D830024N08Rik"; transcript_biotype "lincRNA"
NC_000074.7	Novogene	exon	84319003	84322848	.	+	.	nearest_ref "XR_003947411.2"; exon_number "5"; gene_id "105246804"; transcript_name "TCONS_00011546"; gene_biotype "lncRNA"; class_code "j"; transcript_id "TCONS_00011546"; gene_name "D830024N08Rik"; transcript_biotype "lincRNA"
NC_000074.7	Novogene	exon	84302681	84302945	.	+	.	nearest_ref "XR_003947411.2"; exon_number "1"; gene_id "105246804"; transcript_name "TCONS_00011549"; gene_biotype "lncRNA"; class_code "j"; transcript_id "TCONS_00011549"; gene_name "D830024N08Rik"; transcript_biotype "lincRNA"
NC_000074.7	Novogene	exon	84309923	84310044	.	+	.	nearest_ref "XR_003947411.2"; exon_number "2"; gene_id "105246804"; transcript_name "TCONS_00011549"; gene_biotype "lncRNA"; class_code "j"; transcript_id "TCONS_00011549"; gene_name "D830024N08Rik"; transcript_biotype "lincRNA"
NC_000074.7	Novogene	exon	84319003	84323903	.	+	.	nearest_ref "XR_003947411.2"; exon_number "3"; gene_id "105246804"; transcript_name "TCONS_00011549"; gene_biotype "lncRNA"; class_code "j"; transcript_id "TCONS_00011549"; gene_name "D830024N08Rik"; transcript_biotype "lincRNA"
NC_000074.7	Novogene	exon	84302683	84302945	.	+	.	nearest_ref "XR_003947411.2"; exon_number "1"; gene_id "105246804"; transcript_name "TCONS_00011550"; gene_biotype "lncRNA"; class_code "j"; transcript_id "TCONS_00011550"; gene_name "D830024N08Rik"; transcript_biotype "lincRNA"
NC_000074.7	Novogene	exon	84309026	84309100	.	+	.	nearest_ref "XR_003947411.2"; exon_number "2"; gene_id "105246804"; transcript_name "TCONS_00011550"; gene_biotype "lncRNA"; class_code "j"; transcript_id "TCONS_00011550"; gene_name "D830024N08Rik"; transcript_biotype "lincRNA"
NC_000074.7	Novogene	exon	84309923	84310044	.	+	.	nearest_ref "XR_003947411.2"; exon_number "3"; gene_id "105246804"; transcript_name "TCONS_00011550"; gene_biotype "lncRNA"; class_code "j"; transcript_id "TCONS_00011550"; gene_name "D830024N08Rik"; transcript_biotype "lincRNA"
NC_000074.7	Novogene	exon	84317289	84317459	.	+	.	nearest_ref "XR_003947411.2"; exon_number "4"; gene_id "105246804"; transcript_name "TCONS_00011550"; gene_biotype "lncRNA"; class_code "j"; transcript_id "TCONS_00011550"; gene_name "D830024N08Rik"; transcript_biotype "lincRNA"
NC_000074.7	Novogene	exon	84319003	84322848	.	+	.	nearest_ref "XR_003947411.2"; exon_number "5"; gene_id "105246804"; transcript_name "TCONS_00011550"; gene_biotype "lncRNA"; class_code "j"; transcript_id "TCONS_00011550"; gene_name "D830024N08Rik"; transcript_biotype "lincRNA"
NC_000074.7	Novogene	exon	85640046	85640157	.	+	.	nearest_ref "NR_103491.1"; exon_number "1"; gene_id "100503676"; transcript_name "TCONS_00011577"; gene_biotype "lncRNA"; class_code "j"; transcript_id "TCONS_00011577"; gene_name "Gm38426"; transcript_biotype "lincRNA"
NC_000074.7	Novogene	exon	85640600	85641214	.	+	.	nearest_ref "NR_103491.1"; exon_number "2"; gene_id "100503676"; transcript_name "TCONS_00011577"; gene_biotype "lncRNA"; class_code "j"; transcript_id "TCONS_00011577"; gene_name "Gm38426"; transcript_biotype "lincRNA"
NC_000074.7	Novogene	exon	86457425	86457544	.	+	.	nearest_ref "XR_879039.3"; exon_number "1"; gene_id "105243241"; transcript_name "TCONS_00011598"; gene_biotype "lncRNA"; class_code "j"; transcript_id "TCONS_00011598"; gene_name "Gm39214"; transcript_biotype "lincRNA"
NC_000074.7	Novogene	exon	86458938	86459114	.	+	.	nearest_ref "XR_879039.3"; exon_number "2"; gene_id "105243241"; transcript_name "TCONS_00011598"; gene_biotype "lncRNA"; class_code "j"; transcript_id "TCONS_00011598"; gene_name "Gm39214"; transcript_biotype "lincRNA"
NC_000074.7	Novogene	exon	86487651	86487712	.	+	.	nearest_ref "XR_879039.3"; exon_number "3"; gene_id "105243241"; transcript_name "TCONS_00011598"; gene_biotype "lncRNA"; class_code "j"; transcript_id "TCONS_00011598"; gene_name "Gm39214"; transcript_biotype "lincRNA"
NC_000074.7	Novogene	exon	86490694	86493085	.	+	.	nearest_ref "XR_879039.3"; exon_number "4"; gene_id "105243241"; transcript_name "TCONS_00011598"; gene_biotype "lncRNA"; class_code "j"; transcript_id "TCONS_00011598"; gene_name "Gm39214"; transcript_biotype "lincRNA"
NC_000074.7	Novogene	exon	91555463	91555542	.	+	.	nearest_ref "XM_011248272.4"; exon_number "1"; gene_id "109151"; transcript_name "TCONS_00011627"; gene_biotype "protein_coding"; class_code "j"; transcript_id "TCONS_00011627"; gene_name "Chd9"; transcript_biotype "others"
NC_000074.7	Novogene	exon	91576262	91582676	.	+	.	nearest_ref "XM_011248272.4"; exon_number "2"; gene_id "109151"; transcript_name "TCONS_00011627"; gene_biotype "protein_coding"; class_code "j"; transcript_id "TCONS_00011627"; gene_name "Chd9"; transcript_biotype "others"
NC_000074.7	Novogene	exon	91585088	91587183	.	+	.	nearest_ref "XM_011248272.4"; exon_number "3"; gene_id "109151"; transcript_name "TCONS_00011627"; gene_biotype "protein_coding"; class_code "j"; transcript_id "TCONS_00011627"; gene_name "Chd9"; transcript_biotype "others"
NC_000074.7	Novogene	exon	112284811	112291012	.	+	.	nearest_ref "XM_036153773.1"; exon_number "1"; gene_id "170737"; transcript_name "TCONS_00011769"; gene_biotype "protein_coding"; class_code "i"; transcript_id "TCONS_00011769"; gene_name "Znrf1"; transcript_biotype "sense_intronic"
NC_000074.7	Novogene	exon	112291077	112292570	.	+	.	nearest_ref "XM_036153773.1"; exon_number "2"; gene_id "170737"; transcript_name "TCONS_00011769"; gene_biotype "protein_coding"; class_code "i"; transcript_id "TCONS_00011769"; gene_name "Znrf1"; transcript_biotype "sense_intronic"
NC_000074.7	Novogene	exon	112289688	112291012	.	+	.	nearest_ref "XM_036153773.1"; exon_number "1"; gene_id "170737"; transcript_name "TCONS_00011770"; gene_biotype "protein_coding"; class_code "i"; transcript_id "TCONS_00011770"; gene_name "Znrf1"; transcript_biotype "sense_intronic"
NC_000074.7	Novogene	exon	112291073	112292547	.	+	.	nearest_ref "XM_036153773.1"; exon_number "2"; gene_id "170737"; transcript_name "TCONS_00011770"; gene_biotype "protein_coding"; class_code "i"; transcript_id "TCONS_00011770"; gene_name "Znrf1"; transcript_biotype "sense_intronic"
NC_000074.7	Novogene	exon	123769314	123771259	.	+	.	nearest_ref "NR_045268.1"; exon_number "1"; gene_id "100503178"; transcript_name "TCONS_00011832"; gene_biotype "lncRNA"; class_code "o"; transcript_id "TCONS_00011832"; gene_name "2810013P06Rik"; transcript_biotype "sense_overlapping"
NC_000074.7	Novogene	exon	123773560	123773967	.	+	.	nearest_ref "NR_045268.1"; exon_number "2"; gene_id "100503178"; transcript_name "TCONS_00011832"; gene_biotype "lncRNA"; class_code "o"; transcript_id "TCONS_00011832"; gene_name "2810013P06Rik"; transcript_biotype "sense_overlapping"
NC_000074.7	Novogene	exon	34359311	34383749	.	-	.	nearest_ref "XR_378780.3"; exon_number "1"; gene_id "19663"; transcript_name "TCONS_00011986"; gene_biotype "protein_coding"; class_code "o"; transcript_id "TCONS_00011986"; gene_name "Rbpms"; transcript_biotype "sense_overlapping"
NC_000074.7	Novogene	exon	34384051	34393416	.	-	.	nearest_ref "XR_378780.3"; exon_number "2"; gene_id "19663"; transcript_name "TCONS_00011986"; gene_biotype "protein_coding"; class_code "o"; transcript_id "TCONS_00011986"; gene_name "Rbpms"; transcript_biotype "sense_overlapping"
NC_000074.7	Novogene	exon	34359334	34383925	.	-	.	nearest_ref "XR_378780.3"; exon_number "1"; gene_id "19663"; transcript_name "TCONS_00011987"; gene_biotype "protein_coding"; class_code "o"; transcript_id "TCONS_00011987"; gene_name "Rbpms"; transcript_biotype "sense_overlapping"
NC_000074.7	Novogene	exon	34384051	34393354	.	-	.	nearest_ref "XR_378780.3"; exon_number "2"; gene_id "19663"; transcript_name "TCONS_00011987"; gene_biotype "protein_coding"; class_code "o"; transcript_id "TCONS_00011987"; gene_name "Rbpms"; transcript_biotype "sense_overlapping"
NC_000074.7	Novogene	exon	37153839	37159041	.	-	.	nearest_ref "NM_001194940.2"; exon_number "1"; gene_id "50768"; transcript_name "TCONS_00012007"; gene_biotype "protein_coding"; class_code "o"; transcript_id "TCONS_00012007"; gene_name "Dlc1"; transcript_biotype "sense_overlapping"
NC_000074.7	Novogene	exon	37444061	37444082	.	-	.	nearest_ref "NM_001194940.2"; exon_number "2"; gene_id "50768"; transcript_name "TCONS_00012007"; gene_biotype "protein_coding"; class_code "o"; transcript_id "TCONS_00012007"; gene_name "Dlc1"; transcript_biotype "sense_overlapping"
NC_000074.7	Novogene	exon	48355192	48355592	.	-	.	nearest_ref "NM_133791.5"; exon_number "1"; gene_id "52357"; transcript_name "TCONS_00012056"; gene_biotype "protein_coding"; class_code "o"; transcript_id "TCONS_00012056"; gene_name "Wwc2"; transcript_biotype "sense_overlapping"
NC_000074.7	Novogene	exon	48426563	48428855	.	-	.	nearest_ref "NM_133791.5"; exon_number "2"; gene_id "52357"; transcript_name "TCONS_00012056"; gene_biotype "protein_coding"; class_code "o"; transcript_id "TCONS_00012056"; gene_name "Wwc2"; transcript_biotype "sense_overlapping"
NC_000074.7	Novogene	exon	57757296	57757467	.	-	.	nearest_ref "NR_154048.1"; exon_number "1"; gene_id "102636514"; transcript_name "TCONS_00012061"; gene_biotype "lncRNA"; class_code "j"; transcript_id "TCONS_00012061"; gene_name "Hand2os1"; transcript_biotype "lincRNA"
NC_000074.7	Novogene	exon	57758290	57758450	.	-	.	nearest_ref "NR_154048.1"; exon_number "2"; gene_id "102636514"; transcript_name "TCONS_00012061"; gene_biotype "lncRNA"; class_code "j"; transcript_id "TCONS_00012061"; gene_name "Hand2os1"; transcript_biotype "lincRNA"
NC_000074.7	Novogene	exon	57760114	57760210	.	-	.	nearest_ref "NR_154048.1"; exon_number "3"; gene_id "102636514"; transcript_name "TCONS_00012061"; gene_biotype "lncRNA"; class_code "j"; transcript_id "TCONS_00012061"; gene_name "Hand2os1"; transcript_biotype "lincRNA"
NC_000074.7	Novogene	exon	57766674	57766872	.	-	.	nearest_ref "NR_154048.1"; exon_number "4"; gene_id "102636514"; transcript_name "TCONS_00012061"; gene_biotype "lncRNA"; class_code "j"; transcript_id "TCONS_00012061"; gene_name "Hand2os1"; transcript_biotype "lincRNA"
NC_000074.7	Novogene	exon	57767550	57767649	.	-	.	nearest_ref "NR_154048.1"; exon_number "5"; gene_id "102636514"; transcript_name "TCONS_00012061"; gene_biotype "lncRNA"; class_code "j"; transcript_id "TCONS_00012061"; gene_name "Hand2os1"; transcript_biotype "lincRNA"
NC_000074.7	Novogene	exon	57773219	57773475	.	-	.	nearest_ref "NR_154048.1"; exon_number "6"; gene_id "102636514"; transcript_name "TCONS_00012061"; gene_biotype "lncRNA"; class_code "j"; transcript_id "TCONS_00012061"; gene_name "Hand2os1"; transcript_biotype "lincRNA"
NC_000074.7	Novogene	exon	57773724	57773894	.	-	.	nearest_ref "NR_154048.1"; exon_number "7"; gene_id "102636514"; transcript_name "TCONS_00012061"; gene_biotype "lncRNA"; class_code "j"; transcript_id "TCONS_00012061"; gene_name "Hand2os1"; transcript_biotype "lincRNA"
NC_000074.7	Novogene	exon	57757296	57757467	.	-	.	nearest_ref "NR_154048.1"; exon_number "1"; gene_id "102636514"; transcript_name "TCONS_00012063"; gene_biotype "lncRNA"; class_code "j"; transcript_id "TCONS_00012063"; gene_name "Hand2os1"; transcript_biotype "lincRNA"
NC_000074.7	Novogene	exon	57760114	57760210	.	-	.	nearest_ref "NR_154048.1"; exon_number "2"; gene_id "102636514"; transcript_name "TCONS_00012063"; gene_biotype "lncRNA"; class_code "j"; transcript_id "TCONS_00012063"; gene_name "Hand2os1"; transcript_biotype "lincRNA"
NC_000074.7	Novogene	exon	57767550	57767649	.	-	.	nearest_ref "NR_154048.1"; exon_number "3"; gene_id "102636514"; transcript_name "TCONS_00012063"; gene_biotype "lncRNA"; class_code "j"; transcript_id "TCONS_00012063"; gene_name "Hand2os1"; transcript_biotype "lincRNA"
NC_000074.7	Novogene	exon	57773219	57773323	.	-	.	nearest_ref "NR_154048.1"; exon_number "4"; gene_id "102636514"; transcript_name "TCONS_00012063"; gene_biotype "lncRNA"; class_code "j"; transcript_id "TCONS_00012063"; gene_name "Hand2os1"; transcript_biotype "lincRNA"
NC_000074.7	Novogene	exon	57773724	57773894	.	-	.	nearest_ref "NR_154048.1"; exon_number "5"; gene_id "102636514"; transcript_name "TCONS_00012063"; gene_biotype "lncRNA"; class_code "j"; transcript_id "TCONS_00012063"; gene_name "Hand2os1"; transcript_biotype "lincRNA"
NC_000074.7	Novogene	exon	57757296	57757467	.	-	.	nearest_ref "NR_154048.1"; exon_number "1"; gene_id "102636514"; transcript_name "TCONS_00012065"; gene_biotype "lncRNA"; class_code "j"; transcript_id "TCONS_00012065"; gene_name "Hand2os1"; transcript_biotype "lincRNA"
NC_000074.7	Novogene	exon	57760114	57760210	.	-	.	nearest_ref "NR_154048.1"; exon_number "2"; gene_id "102636514"; transcript_name "TCONS_00012065"; gene_biotype "lncRNA"; class_code "j"; transcript_id "TCONS_00012065"; gene_name "Hand2os1"; transcript_biotype "lincRNA"
NC_000074.7	Novogene	exon	57767550	57767649	.	-	.	nearest_ref "NR_154048.1"; exon_number "3"; gene_id "102636514"; transcript_name "TCONS_00012065"; gene_biotype "lncRNA"; class_code "j"; transcript_id "TCONS_00012065"; gene_name "Hand2os1"; transcript_biotype "lincRNA"
NC_000074.7	Novogene	exon	57773219	57773475	.	-	.	nearest_ref "NR_154048.1"; exon_number "4"; gene_id "102636514"; transcript_name "TCONS_00012065"; gene_biotype "lncRNA"; class_code "j"; transcript_id "TCONS_00012065"; gene_name "Hand2os1"; transcript_biotype "lincRNA"
NC_000074.7	Novogene	exon	57773724	57773894	.	-	.	nearest_ref "NR_154048.1"; exon_number "5"; gene_id "102636514"; transcript_name "TCONS_00012065"; gene_biotype "lncRNA"; class_code "j"; transcript_id "TCONS_00012065"; gene_name "Hand2os1"; transcript_biotype "lincRNA"
NC_000074.7	Novogene	exon	57757296	57757467	.	-	.	nearest_ref "NR_154048.1"; exon_number "1"; gene_id "102636514"; transcript_name "TCONS_00012067"; gene_biotype "lncRNA"; class_code "j"; transcript_id "TCONS_00012067"; gene_name "Hand2os1"; transcript_biotype "lincRNA"
NC_000074.7	Novogene	exon	57760114	57760210	.	-	.	nearest_ref "NR_154048.1"; exon_number "2"; gene_id "102636514"; transcript_name "TCONS_00012067"; gene_biotype "lncRNA"; class_code "j"; transcript_id "TCONS_00012067"; gene_name "Hand2os1"; transcript_biotype "lincRNA"
NC_000074.7	Novogene	exon	57766674	57766872	.	-	.	nearest_ref "NR_154048.1"; exon_number "3"; gene_id "102636514"; transcript_name "TCONS_00012067"; gene_biotype "lncRNA"; class_code "j"; transcript_id "TCONS_00012067"; gene_name "Hand2os1"; transcript_biotype "lincRNA"
NC_000074.7	Novogene	exon	57767550	57767649	.	-	.	nearest_ref "NR_154048.1"; exon_number "4"; gene_id "102636514"; transcript_name "TCONS_00012067"; gene_biotype "lncRNA"; class_code "j"; transcript_id "TCONS_00012067"; gene_name "Hand2os1"; transcript_biotype "lincRNA"
NC_000074.7	Novogene	exon	57773219	57773323	.	-	.	nearest_ref "NR_154048.1"; exon_number "5"; gene_id "102636514"; transcript_name "TCONS_00012067"; gene_biotype "lncRNA"; class_code "j"; transcript_id "TCONS_00012067"; gene_name "Hand2os1"; transcript_biotype "lincRNA"
NC_000074.7	Novogene	exon	57773724	57773894	.	-	.	nearest_ref "NR_154048.1"; exon_number "6"; gene_id "102636514"; transcript_name "TCONS_00012067"; gene_biotype "lncRNA"; class_code "j"; transcript_id "TCONS_00012067"; gene_name "Hand2os1"; transcript_biotype "lincRNA"
NC_000074.7	Novogene	exon	57757296	57757467	.	-	.	nearest_ref "NR_154048.1"; exon_number "1"; gene_id "102636514"; transcript_name "TCONS_00012064"; gene_biotype "lncRNA"; class_code "j"; transcript_id "TCONS_00012064"; gene_name "Hand2os1"; transcript_biotype "lincRNA"
NC_000074.7	Novogene	exon	57758290	57758450	.	-	.	nearest_ref "NR_154048.1"; exon_number "2"; gene_id "102636514"; transcript_name "TCONS_00012064"; gene_biotype "lncRNA"; class_code "j"; transcript_id "TCONS_00012064"; gene_name "Hand2os1"; transcript_biotype "lincRNA"
NC_000074.7	Novogene	exon	57760114	57760210	.	-	.	nearest_ref "NR_154048.1"; exon_number "3"; gene_id "102636514"; transcript_name "TCONS_00012064"; gene_biotype "lncRNA"; class_code "j"; transcript_id "TCONS_00012064"; gene_name "Hand2os1"; transcript_biotype "lincRNA"
NC_000074.7	Novogene	exon	57767550	57767649	.	-	.	nearest_ref "NR_154048.1"; exon_number "4"; gene_id "102636514"; transcript_name "TCONS_00012064"; gene_biotype "lncRNA"; class_code "j"; transcript_id "TCONS_00012064"; gene_name "Hand2os1"; transcript_biotype "lincRNA"
NC_000074.7	Novogene	exon	57773219	57773475	.	-	.	nearest_ref "NR_154048.1"; exon_number "5"; gene_id "102636514"; transcript_name "TCONS_00012064"; gene_biotype "lncRNA"; class_code "j"; transcript_id "TCONS_00012064"; gene_name "Hand2os1"; transcript_biotype "lincRNA"
NC_000074.7	Novogene	exon	57773724	57773894	.	-	.	nearest_ref "NR_154048.1"; exon_number "6"; gene_id "102636514"; transcript_name "TCONS_00012064"; gene_biotype "lncRNA"; class_code "j"; transcript_id "TCONS_00012064"; gene_name "Hand2os1"; transcript_biotype "lincRNA"
NC_000074.7	Novogene	exon	57757296	57757467	.	-	.	nearest_ref "NR_154048.1"; exon_number "1"; gene_id "102636514"; transcript_name "TCONS_00012060"; gene_biotype "lncRNA"; class_code "j"; transcript_id "TCONS_00012060"; gene_name "Hand2os1"; transcript_biotype "lincRNA"
NC_000074.7	Novogene	exon	57758290	57758450	.	-	.	nearest_ref "NR_154048.1"; exon_number "2"; gene_id "102636514"; transcript_name "TCONS_00012060"; gene_biotype "lncRNA"; class_code "j"; transcript_id "TCONS_00012060"; gene_name "Hand2os1"; transcript_biotype "lincRNA"
NC_000074.7	Novogene	exon	57760114	57760210	.	-	.	nearest_ref "NR_154048.1"; exon_number "3"; gene_id "102636514"; transcript_name "TCONS_00012060"; gene_biotype "lncRNA"; class_code "j"; transcript_id "TCONS_00012060"; gene_name "Hand2os1"; transcript_biotype "lincRNA"
NC_000074.7	Novogene	exon	57766674	57766872	.	-	.	nearest_ref "NR_154048.1"; exon_number "4"; gene_id "102636514"; transcript_name "TCONS_00012060"; gene_biotype "lncRNA"; class_code "j"; transcript_id "TCONS_00012060"; gene_name "Hand2os1"; transcript_biotype "lincRNA"
NC_000074.7	Novogene	exon	57767550	57767649	.	-	.	nearest_ref "NR_154048.1"; exon_number "5"; gene_id "102636514"; transcript_name "TCONS_00012060"; gene_biotype "lncRNA"; class_code "j"; transcript_id "TCONS_00012060"; gene_name "Hand2os1"; transcript_biotype "lincRNA"
NC_000074.7	Novogene	exon	57773219	57773323	.	-	.	nearest_ref "NR_154048.1"; exon_number "6"; gene_id "102636514"; transcript_name "TCONS_00012060"; gene_biotype "lncRNA"; class_code "j"; transcript_id "TCONS_00012060"; gene_name "Hand2os1"; transcript_biotype "lincRNA"
NC_000074.7	Novogene	exon	57773724	57773894	.	-	.	nearest_ref "NR_154048.1"; exon_number "7"; gene_id "102636514"; transcript_name "TCONS_00012060"; gene_biotype "lncRNA"; class_code "j"; transcript_id "TCONS_00012060"; gene_name "Hand2os1"; transcript_biotype "lincRNA"
NC_000074.7	Novogene	exon	57784726	57785065	.	-	.	nearest_ref "XR_378998.5"; exon_number "1"; gene_id "102637146"; transcript_name "TCONS_00012070"; gene_biotype "lncRNA"; class_code "j"; transcript_id "TCONS_00012070"; gene_name "Gm34030"; transcript_biotype "lincRNA"
NC_000074.7	Novogene	exon	57785536	57785589	.	-	.	nearest_ref "XR_378998.5"; exon_number "2"; gene_id "102637146"; transcript_name "TCONS_00012070"; gene_biotype "lncRNA"; class_code "j"; transcript_id "TCONS_00012070"; gene_name "Gm34030"; transcript_biotype "lincRNA"
NC_000074.7	Novogene	exon	57785792	57785883	.	-	.	nearest_ref "XR_378998.5"; exon_number "3"; gene_id "102637146"; transcript_name "TCONS_00012070"; gene_biotype "lncRNA"; class_code "j"; transcript_id "TCONS_00012070"; gene_name "Gm34030"; transcript_biotype "lincRNA"
NC_000074.7	Novogene	exon	57787173	57787354	.	-	.	nearest_ref "XR_378998.5"; exon_number "4"; gene_id "102637146"; transcript_name "TCONS_00012070"; gene_biotype "lncRNA"; class_code "j"; transcript_id "TCONS_00012070"; gene_name "Gm34030"; transcript_biotype "lincRNA"
NC_000074.7	Novogene	exon	74074125	74079474	.	-	.	nearest_ref "NM_001317391.1"; exon_number "1"; gene_id "16795"; transcript_name "TCONS_00012199"; gene_biotype "protein_coding"; class_code "o"; transcript_id "TCONS_00012199"; gene_name "Large1"; transcript_biotype "sense_overlapping"
NC_000074.7	Novogene	exon	74079879	74080168	.	-	.	nearest_ref "NM_001317391.1"; exon_number "2"; gene_id "16795"; transcript_name "TCONS_00012199"; gene_biotype "protein_coding"; class_code "o"; transcript_id "TCONS_00012199"; gene_name "Large1"; transcript_biotype "sense_overlapping"
NC_000074.7	Novogene	exon	73676096	73678139	.	-	.	nearest_ref "NM_001317391.1"; exon_number "1"; gene_id "16795"; transcript_name "TCONS_00012197"; gene_biotype "protein_coding"; class_code "i"; transcript_id "TCONS_00012197"; gene_name "Large1"; transcript_biotype "sense_intronic"
NC_000074.7	Novogene	exon	73678640	73695272	.	-	.	nearest_ref "NM_001317391.1"; exon_number "2"; gene_id "16795"; transcript_name "TCONS_00012197"; gene_biotype "protein_coding"; class_code "i"; transcript_id "TCONS_00012197"; gene_name "Large1"; transcript_biotype "sense_intronic"
NC_000074.7	Novogene	exon	81532516	81539276	.	-	.	nearest_ref "XM_017312576.3"; exon_number "1"; gene_id "14388"; transcript_name "TCONS_00012231"; gene_biotype "protein_coding"; class_code "o"; transcript_id "TCONS_00012231"; gene_name "Gab1"; transcript_biotype "sense_overlapping"
NC_000074.7	Novogene	exon	81602977	81607108	.	-	.	nearest_ref "XM_017312576.3"; exon_number "2"; gene_id "14388"; transcript_name "TCONS_00012231"; gene_biotype "protein_coding"; class_code "o"; transcript_id "TCONS_00012231"; gene_name "Gab1"; transcript_biotype "sense_overlapping"
NC_000074.7	Novogene	exon	81584147	81584242	.	-	.	nearest_ref "XM_017312576.3"; exon_number "1"; gene_id "14388"; transcript_name "TCONS_00012232"; gene_biotype "protein_coding"; class_code "o"; transcript_id "TCONS_00012232"; gene_name "Gab1"; transcript_biotype "sense_overlapping"
NC_000074.7	Novogene	exon	81584311	81595193	.	-	.	nearest_ref "XM_017312576.3"; exon_number "2"; gene_id "14388"; transcript_name "TCONS_00012232"; gene_biotype "protein_coding"; class_code "o"; transcript_id "TCONS_00012232"; gene_name "Gab1"; transcript_biotype "sense_overlapping"
NC_000074.7	Novogene	exon	96534981	96535387	.	-	.	nearest_ref "NR_015574.3"; exon_number "1"; gene_id "319960"; transcript_name "TCONS_00012351"; gene_biotype "lncRNA"; class_code "x"; transcript_id "TCONS_00012351"; gene_name "4930513N10Rik"; transcript_biotype "antisense"
NC_000074.7	Novogene	exon	96539052	96539128	.	-	.	nearest_ref "NR_015574.3"; exon_number "2"; gene_id "319960"; transcript_name "TCONS_00012351"; gene_biotype "lncRNA"; class_code "x"; transcript_id "TCONS_00012351"; gene_name "4930513N10Rik"; transcript_biotype "antisense"
NC_000074.7	Novogene	exon	96544254	96544553	.	-	.	nearest_ref "NR_015574.3"; exon_number "3"; gene_id "319960"; transcript_name "TCONS_00012351"; gene_biotype "lncRNA"; class_code "x"; transcript_id "TCONS_00012351"; gene_name "4930513N10Rik"; transcript_biotype "antisense"
NC_000074.7	Novogene	exon	96535190	96535387	.	-	.	nearest_ref "NR_015574.3"; exon_number "1"; gene_id "319960"; transcript_name "TCONS_00012352"; gene_biotype "lncRNA"; class_code "x"; transcript_id "TCONS_00012352"; gene_name "4930513N10Rik"; transcript_biotype "antisense"
NC_000074.7	Novogene	exon	96539052	96539128	.	-	.	nearest_ref "NR_015574.3"; exon_number "2"; gene_id "319960"; transcript_name "TCONS_00012352"; gene_biotype "lncRNA"; class_code "x"; transcript_id "TCONS_00012352"; gene_name "4930513N10Rik"; transcript_biotype "antisense"
NC_000074.7	Novogene	exon	96544707	96544962	.	-	.	nearest_ref "NR_015574.3"; exon_number "3"; gene_id "319960"; transcript_name "TCONS_00012352"; gene_biotype "lncRNA"; class_code "x"; transcript_id "TCONS_00012352"; gene_name "4930513N10Rik"; transcript_biotype "antisense"
NC_000074.7	Novogene	exon	105328541	105328860	.	-	.	nearest_ref "NM_001252628.1"; exon_number "1"; gene_id "12556"; transcript_name "TCONS_00012363"; gene_biotype "protein_coding"; class_code "j"; transcript_id "TCONS_00012363"; gene_name "Cdh16"; transcript_biotype "others"
NC_000074.7	Novogene	exon	105335790	105336070	.	-	.	nearest_ref "NM_001252628.1"; exon_number "2"; gene_id "12556"; transcript_name "TCONS_00012363"; gene_biotype "protein_coding"; class_code "j"; transcript_id "TCONS_00012363"; gene_name "Cdh16"; transcript_biotype "others"
NC_000074.7	Novogene	exon	123650311	123658797	.	-	.	nearest_ref "XM_036154377.1"; exon_number "1"; gene_id "77087"; transcript_name "TCONS_00012483"; gene_biotype "protein_coding"; class_code "j"; transcript_id "TCONS_00012483"; gene_name "Ankrd11"; transcript_biotype "others"
NC_000074.7	Novogene	exon	123701468	123701531	.	-	.	nearest_ref "XM_036154377.1"; exon_number "2"; gene_id "77087"; transcript_name "TCONS_00012483"; gene_biotype "protein_coding"; class_code "j"; transcript_id "TCONS_00012483"; gene_name "Ankrd11"; transcript_biotype "others"
NC_000074.7	Novogene	exon	123768688	123769023	.	-	.	nearest_ref "XM_036154377.1"; exon_number "3"; gene_id "77087"; transcript_name "TCONS_00012483"; gene_biotype "protein_coding"; class_code "j"; transcript_id "TCONS_00012483"; gene_name "Ankrd11"; transcript_biotype "others"
NC_000074.7	Novogene	exon	123727833	123739593	.	-	.	nearest_ref "NR_037865.1"; exon_number "1"; gene_id "77087"; transcript_name "TCONS_00012484"; gene_biotype "protein_coding"; class_code "i"; transcript_id "TCONS_00012484"; gene_name "Ankrd11"; transcript_biotype "sense_intronic"
NC_000074.7	Novogene	exon	123739831	123751430	.	-	.	nearest_ref "NR_037865.1"; exon_number "2"; gene_id "77087"; transcript_name "TCONS_00012484"; gene_biotype "protein_coding"; class_code "i"; transcript_id "TCONS_00012484"; gene_name "Ankrd11"; transcript_biotype "sense_intronic"
NC_000075.7	Novogene	exon	32198069	32198126	.	+	.	exon_number "1"; gene_id "XLOC_007520"; transcript_name "TCONS_00012654"; gene_biotype "novel"; class_code "u"; transcript_id "TCONS_00012654"; gene_name "XLOC_007520"; transcript_biotype "lincRNA"
NC_000075.7	Novogene	exon	32198357	32198532	.	+	.	exon_number "2"; gene_id "XLOC_007520"; transcript_name "TCONS_00012654"; gene_biotype "novel"; class_code "u"; transcript_id "TCONS_00012654"; gene_name "XLOC_007520"; transcript_biotype "lincRNA"
NC_000075.7	Novogene	exon	44390325	44390708	.	+	.	exon_number "1"; gene_id "XLOC_007551"; transcript_name "TCONS_00012708"; gene_biotype "novel"; class_code "u"; transcript_id "TCONS_00012708"; gene_name "XLOC_007551"; transcript_biotype "lincRNA"
NC_000075.7	Novogene	exon	44392842	44393468	.	+	.	exon_number "2"; gene_id "XLOC_007551"; transcript_name "TCONS_00012708"; gene_biotype "novel"; class_code "u"; transcript_id "TCONS_00012708"; gene_name "XLOC_007551"; transcript_biotype "lincRNA"
NC_000075.7	Novogene	exon	45931999	45947405	.	+	.	nearest_ref "XR_004935770.1"; exon_number "1"; gene_id "108167650"; transcript_name "TCONS_00012734"; gene_biotype "lncRNA"; class_code "x"; transcript_id "TCONS_00012734"; gene_name "Gm46110"; transcript_biotype "antisense"
NC_000075.7	Novogene	exon	45948164	45952207	.	+	.	nearest_ref "XR_004935770.1"; exon_number "2"; gene_id "108167650"; transcript_name "TCONS_00012734"; gene_biotype "lncRNA"; class_code "x"; transcript_id "TCONS_00012734"; gene_name "Gm46110"; transcript_biotype "antisense"
NC_000075.7	Novogene	exon	67098853	67099062	.	+	.	exon_number "1"; gene_id "XLOC_007658"; transcript_name "TCONS_00012889"; gene_biotype "novel"; class_code "u"; transcript_id "TCONS_00012889"; gene_name "XLOC_007658"; transcript_biotype "lincRNA"
NC_000075.7	Novogene	exon	67105893	67106090	.	+	.	exon_number "2"; gene_id "XLOC_007658"; transcript_name "TCONS_00012889"; gene_biotype "novel"; class_code "u"; transcript_id "TCONS_00012889"; gene_name "XLOC_007658"; transcript_biotype "lincRNA"
NC_000075.7	Novogene	exon	67112034	67112499	.	+	.	exon_number "3"; gene_id "XLOC_007658"; transcript_name "TCONS_00012889"; gene_biotype "novel"; class_code "u"; transcript_id "TCONS_00012889"; gene_name "XLOC_007658"; transcript_biotype "lincRNA"
NC_000075.7	Novogene	exon	100525953	100525973	.	+	.	nearest_ref "NM_001357265.1"; exon_number "1"; gene_id "20842"; transcript_name "TCONS_00013015"; gene_biotype "protein_coding"; class_code "i"; transcript_id "TCONS_00013015"; gene_name "Stag1"; transcript_biotype "sense_intronic"
NC_000075.7	Novogene	exon	100526170	100541677	.	+	.	nearest_ref "NM_001357265.1"; exon_number "2"; gene_id "20842"; transcript_name "TCONS_00013015"; gene_biotype "protein_coding"; class_code "i"; transcript_id "TCONS_00013015"; gene_name "Stag1"; transcript_biotype "sense_intronic"
NC_000075.7	Novogene	exon	101204490	101204698	.	+	.	nearest_ref "NR_110509.1"; exon_number "1"; gene_id "102633035"; transcript_name "TCONS_00013019"; gene_biotype "lncRNA"; class_code "j"; transcript_id "TCONS_00013019"; gene_name "Gm28979"; transcript_biotype "lincRNA"
NC_000075.7	Novogene	exon	101218748	101220372	.	+	.	nearest_ref "NR_110509.1"; exon_number "2"; gene_id "102633035"; transcript_name "TCONS_00013019"; gene_biotype "lncRNA"; class_code "j"; transcript_id "TCONS_00013019"; gene_name "Gm28979"; transcript_biotype "lincRNA"
NC_000075.7	Novogene	exon	101224138	101228577	.	+	.	nearest_ref "NR_110509.1"; exon_number "3"; gene_id "102633035"; transcript_name "TCONS_00013019"; gene_biotype "lncRNA"; class_code "j"; transcript_id "TCONS_00013019"; gene_name "Gm28979"; transcript_biotype "lincRNA"
NC_000075.7	Novogene	exon	122004958	122005544	.	+	.	nearest_ref "NM_001271873.1"; exon_number "1"; gene_id "102566"; transcript_name "TCONS_00013224"; gene_biotype "protein_coding"; class_code "x"; transcript_id "TCONS_00013224"; gene_name "Ano10"; transcript_biotype "antisense"
NC_000075.7	Novogene	exon	122016592	122016680	.	+	.	nearest_ref "NM_001271873.1"; exon_number "2"; gene_id "102566"; transcript_name "TCONS_00013224"; gene_biotype "protein_coding"; class_code "x"; transcript_id "TCONS_00013224"; gene_name "Ano10"; transcript_biotype "antisense"
NC_000075.7	Novogene	exon	7991903	7993591	.	-	.	nearest_ref "XM_006509852.4"; exon_number "1"; gene_id "22601"; transcript_name "TCONS_00013254"; gene_biotype "protein_coding"; class_code "i"; transcript_id "TCONS_00013254"; gene_name "Yap1"; transcript_biotype "sense_intronic"
NC_000075.7	Novogene	exon	7995551	8000896	.	-	.	nearest_ref "XM_006509852.4"; exon_number "2"; gene_id "22601"; transcript_name "TCONS_00013254"; gene_biotype "protein_coding"; class_code "i"; transcript_id "TCONS_00013254"; gene_name "Yap1"; transcript_biotype "sense_intronic"
NC_000075.7	Novogene	exon	32242117	32247480	.	-	.	nearest_ref "XM_017313153.2"; exon_number "1"; gene_id "16521"; transcript_name "TCONS_00013357"; gene_biotype "protein_coding"; class_code "i"; transcript_id "TCONS_00013357"; gene_name "Kcnj5"; transcript_biotype "sense_intronic"
NC_000075.7	Novogene	exon	32248718	32249806	.	-	.	nearest_ref "XM_017313153.2"; exon_number "2"; gene_id "16521"; transcript_name "TCONS_00013357"; gene_biotype "protein_coding"; class_code "i"; transcript_id "TCONS_00013357"; gene_name "Kcnj5"; transcript_biotype "sense_intronic"
NC_000075.7	Novogene	exon	50398215	50400787	.	-	.	nearest_ref "NR_040714.2"; exon_number "1"; gene_id "69631"; transcript_name "TCONS_00013460"; gene_biotype "lncRNA"; class_code "j"; transcript_id "TCONS_00013460"; gene_name "Plet1os"; transcript_biotype "lincRNA"
NC_000075.7	Novogene	exon	50419002	50420208	.	-	.	nearest_ref "NR_040714.2"; exon_number "2"; gene_id "69631"; transcript_name "TCONS_00013460"; gene_biotype "lncRNA"; class_code "j"; transcript_id "TCONS_00013460"; gene_name "Plet1os"; transcript_biotype "lincRNA"
NC_000075.7	Novogene	exon	64150530	64155354	.	-	.	nearest_ref "NM_008927.4"; exon_number "1"; gene_id "26395"; transcript_name "TCONS_00013555"; gene_biotype "protein_coding"; class_code "o"; transcript_id "TCONS_00013555"; gene_name "Map2k1"; transcript_biotype "sense_overlapping"
NC_000075.7	Novogene	exon	64155546	64160876	.	-	.	nearest_ref "NM_008927.4"; exon_number "2"; gene_id "26395"; transcript_name "TCONS_00013555"; gene_biotype "protein_coding"; class_code "o"; transcript_id "TCONS_00013555"; gene_name "Map2k1"; transcript_biotype "sense_overlapping"
NC_000075.7	Novogene	exon	77139422	77142991	.	-	.	nearest_ref "XM_036155267.1"; exon_number "1"; gene_id "69642"; transcript_name "TCONS_00013643"; gene_biotype "protein_coding"; class_code "i"; transcript_id "TCONS_00013643"; gene_name "Mlip"; transcript_biotype "sense_intronic"
NC_000075.7	Novogene	exon	77143068	77144274	.	-	.	nearest_ref "XM_036155267.1"; exon_number "2"; gene_id "69642"; transcript_name "TCONS_00013643"; gene_biotype "protein_coding"; class_code "i"; transcript_id "TCONS_00013643"; gene_name "Mlip"; transcript_biotype "sense_intronic"
NC_000075.7	Novogene	exon	110485563	110485726	.	-	.	nearest_ref "XR_003948251.1"; exon_number "1"; gene_id "102639389"; transcript_name "TCONS_00013852"; gene_biotype "lncRNA"; class_code "o"; transcript_id "TCONS_00013852"; gene_name "Gm35715"; transcript_biotype "sense_overlapping"
NC_000075.7	Novogene	exon	110521384	110521451	.	-	.	nearest_ref "XR_003948251.1"; exon_number "2"; gene_id "102639389"; transcript_name "TCONS_00013852"; gene_biotype "lncRNA"; class_code "o"; transcript_id "TCONS_00013852"; gene_name "Gm35715"; transcript_biotype "sense_overlapping"
NC_000075.7	Novogene	exon	110537514	110537593	.	-	.	nearest_ref "XR_003948251.1"; exon_number "3"; gene_id "102639389"; transcript_name "TCONS_00013852"; gene_biotype "lncRNA"; class_code "o"; transcript_id "TCONS_00013852"; gene_name "Gm35715"; transcript_biotype "sense_overlapping"
NC_000075.7	Novogene	exon	110538962	110539023	.	-	.	nearest_ref "XR_003948251.1"; exon_number "4"; gene_id "102639389"; transcript_name "TCONS_00013852"; gene_biotype "lncRNA"; class_code "o"; transcript_id "TCONS_00013852"; gene_name "Gm35715"; transcript_biotype "sense_overlapping"
NC_000075.7	Novogene	exon	110539195	110539229	.	-	.	nearest_ref "XR_003948251.1"; exon_number "5"; gene_id "102639389"; transcript_name "TCONS_00013852"; gene_biotype "lncRNA"; class_code "o"; transcript_id "TCONS_00013852"; gene_name "Gm35715"; transcript_biotype "sense_overlapping"
NC_000075.7	Novogene	exon	110540154	110540230	.	-	.	nearest_ref "XR_003948251.1"; exon_number "6"; gene_id "102639389"; transcript_name "TCONS_00013852"; gene_biotype "lncRNA"; class_code "o"; transcript_id "TCONS_00013852"; gene_name "Gm35715"; transcript_biotype "sense_overlapping"
NC_000075.7	Novogene	exon	110540319	110540926	.	-	.	nearest_ref "XR_003948251.1"; exon_number "7"; gene_id "102639389"; transcript_name "TCONS_00013852"; gene_biotype "lncRNA"; class_code "o"; transcript_id "TCONS_00013852"; gene_name "Gm35715"; transcript_biotype "sense_overlapping"
NC_000075.7	Novogene	exon	122004940	122005544	.	-	.	nearest_ref "XM_011242929.4"; exon_number "1"; gene_id "102566"; transcript_name "TCONS_00013916"; gene_biotype "protein_coding"; class_code "j"; transcript_id "TCONS_00013916"; gene_name "Ano10"; transcript_biotype "others"
NC_000075.7	Novogene	exon	122011887	122011938	.	-	.	nearest_ref "XM_011242929.4"; exon_number "2"; gene_id "102566"; transcript_name "TCONS_00013916"; gene_biotype "protein_coding"; class_code "j"; transcript_id "TCONS_00013916"; gene_name "Ano10"; transcript_biotype "others"
NC_000075.7	Novogene	exon	122016592	122016751	.	-	.	nearest_ref "XM_011242929.4"; exon_number "3"; gene_id "102566"; transcript_name "TCONS_00013916"; gene_biotype "protein_coding"; class_code "j"; transcript_id "TCONS_00013916"; gene_name "Ano10"; transcript_biotype "others"
NC_000076.7	Novogene	exon	36567600	36595629	.	+	.	nearest_ref "NM_001253355.1"; exon_number "1"; gene_id "319415"; transcript_name "TCONS_00014058"; gene_biotype "protein_coding"; class_code "o"; transcript_id "TCONS_00014058"; gene_name "Hs3st5"; transcript_biotype "sense_overlapping"
NC_000076.7	Novogene	exon	36607338	36612908	.	+	.	nearest_ref "NM_001253355.1"; exon_number "2"; gene_id "319415"; transcript_name "TCONS_00014058"; gene_biotype "protein_coding"; class_code "o"; transcript_id "TCONS_00014058"; gene_name "Hs3st5"; transcript_biotype "sense_overlapping"
NC_000076.7	Novogene	exon	36619699	36620347	.	+	.	nearest_ref "NM_001253355.1"; exon_number "3"; gene_id "319415"; transcript_name "TCONS_00014058"; gene_biotype "protein_coding"; class_code "o"; transcript_id "TCONS_00014058"; gene_name "Hs3st5"; transcript_biotype "sense_overlapping"
NC_000076.7	Novogene	exon	69369538	69370114	.	+	.	nearest_ref "NM_146005.3"; exon_number "1"; gene_id "11735"; transcript_name "TCONS_00014190"; gene_biotype "protein_coding"; class_code "j"; transcript_id "TCONS_00014190"; gene_name "Ank3"; transcript_biotype "others"
NC_000076.7	Novogene	exon	69430880	69441315	.	+	.	nearest_ref "NM_146005.3"; exon_number "2"; gene_id "11735"; transcript_name "TCONS_00014190"; gene_biotype "protein_coding"; class_code "j"; transcript_id "TCONS_00014190"; gene_name "Ank3"; transcript_biotype "others"
NC_000076.7	Novogene	exon	89522260	89522381	.	+	.	nearest_ref "NR_130956.1"; exon_number "1"; gene_id "69002"; transcript_name "TCONS_00014383"; gene_biotype "lncRNA"; class_code "j"; transcript_id "TCONS_00014383"; gene_name "1500026H17Rik"; transcript_biotype "lincRNA"
NC_000076.7	Novogene	exon	89525011	89525211	.	+	.	nearest_ref "NR_130956.1"; exon_number "2"; gene_id "69002"; transcript_name "TCONS_00014383"; gene_biotype "lncRNA"; class_code "j"; transcript_id "TCONS_00014383"; gene_name "1500026H17Rik"; transcript_biotype "lincRNA"
NC_000076.7	Novogene	exon	95153465	95154551	.	+	.	nearest_ref "NM_009950.3"; exon_number "1"; gene_id "12905"; transcript_name "TCONS_00014406"; gene_biotype "protein_coding"; class_code "x"; transcript_id "TCONS_00014406"; gene_name "Cradd"; transcript_biotype "antisense"
NC_000076.7	Novogene	exon	95159608	95163904	.	+	.	nearest_ref "NM_009950.3"; exon_number "2"; gene_id "12905"; transcript_name "TCONS_00014406"; gene_biotype "protein_coding"; class_code "x"; transcript_id "TCONS_00014406"; gene_name "Cradd"; transcript_biotype "antisense"
NC_000076.7	Novogene	exon	95806422	95807448	.	+	.	nearest_ref "XM_006513522.5"; exon_number "1"; gene_id "216238"; transcript_name "TCONS_00014414"; gene_biotype "protein_coding"; class_code "j"; transcript_id "TCONS_00014414"; gene_name "Eea1"; transcript_biotype "others"
NC_000076.7	Novogene	exon	95809848	95817686	.	+	.	nearest_ref "XM_006513522.5"; exon_number "2"; gene_id "216238"; transcript_name "TCONS_00014414"; gene_biotype "protein_coding"; class_code "j"; transcript_id "TCONS_00014414"; gene_name "Eea1"; transcript_biotype "others"
NC_000076.7	Novogene	exon	126809409	126809424	.	+	.	nearest_ref "NM_001113470.1"; exon_number "1"; gene_id "52468"; transcript_name "TCONS_00014481"; gene_biotype "protein_coding"; class_code "o"; transcript_id "TCONS_00014481"; gene_name "Ctdsp2"; transcript_biotype "sense_overlapping"
NC_000076.7	Novogene	exon	126821494	126825870	.	+	.	nearest_ref "NM_001113470.1"; exon_number "2"; gene_id "52468"; transcript_name "TCONS_00014481"; gene_biotype "protein_coding"; class_code "o"; transcript_id "TCONS_00014481"; gene_name "Ctdsp2"; transcript_biotype "sense_overlapping"
NC_000076.7	Novogene	exon	27449986	27456508	.	-	.	nearest_ref "NM_008481.2"; exon_number "1"; gene_id "16773"; transcript_name "TCONS_00014673"; gene_biotype "protein_coding"; class_code "i"; transcript_id "TCONS_00014673"; gene_name "Lama2"; transcript_biotype "sense_intronic"
NC_000076.7	Novogene	exon	27456598	27470290	.	-	.	nearest_ref "NM_008481.2"; exon_number "2"; gene_id "16773"; transcript_name "TCONS_00014673"; gene_biotype "protein_coding"; class_code "i"; transcript_id "TCONS_00014673"; gene_name "Lama2"; transcript_biotype "sense_intronic"
NC_000076.7	Novogene	exon	56843427	56846957	.	-	.	nearest_ref "XR_380322.2"; exon_number "1"; gene_id "102640859"; transcript_name "TCONS_00014759"; gene_biotype "lncRNA"; class_code "j"; transcript_id "TCONS_00014759"; gene_name "Gm36827"; transcript_biotype "lincRNA"
NC_000076.7	Novogene	exon	56848586	56848709	.	-	.	nearest_ref "XR_380322.2"; exon_number "2"; gene_id "102640859"; transcript_name "TCONS_00014759"; gene_biotype "lncRNA"; class_code "j"; transcript_id "TCONS_00014759"; gene_name "Gm36827"; transcript_biotype "lincRNA"
NC_000076.7	Novogene	exon	56852355	56852439	.	-	.	nearest_ref "XR_380322.2"; exon_number "3"; gene_id "102640859"; transcript_name "TCONS_00014759"; gene_biotype "lncRNA"; class_code "j"; transcript_id "TCONS_00014759"; gene_name "Gm36827"; transcript_biotype "lincRNA"
NC_000076.7	Novogene	exon	56858160	56858327	.	-	.	nearest_ref "XR_380322.2"; exon_number "4"; gene_id "102640859"; transcript_name "TCONS_00014759"; gene_biotype "lncRNA"; class_code "j"; transcript_id "TCONS_00014759"; gene_name "Gm36827"; transcript_biotype "lincRNA"
NC_000076.7	Novogene	exon	75771692	75771838	.	-	.	nearest_ref "NM_001277132.1"; exon_number "1"; gene_id "333670"; transcript_name "TCONS_00014854"; gene_biotype "protein_coding"; class_code "o"; transcript_id "TCONS_00014854"; gene_name "Gm867"; transcript_biotype "sense_overlapping"
NC_000076.7	Novogene	exon	75772072	75772279	.	-	.	nearest_ref "NM_001277132.1"; exon_number "2"; gene_id "333670"; transcript_name "TCONS_00014854"; gene_biotype "protein_coding"; class_code "o"; transcript_id "TCONS_00014854"; gene_name "Gm867"; transcript_biotype "sense_overlapping"
NC_000076.7	Novogene	exon	75773141	75773288	.	-	.	nearest_ref "NM_001277132.1"; exon_number "3"; gene_id "333670"; transcript_name "TCONS_00014854"; gene_biotype "protein_coding"; class_code "o"; transcript_id "TCONS_00014854"; gene_name "Gm867"; transcript_biotype "sense_overlapping"
NC_000076.7	Novogene	exon	75773409	75773581	.	-	.	nearest_ref "NM_001277132.1"; exon_number "4"; gene_id "333670"; transcript_name "TCONS_00014854"; gene_biotype "protein_coding"; class_code "o"; transcript_id "TCONS_00014854"; gene_name "Gm867"; transcript_biotype "sense_overlapping"
NC_000077.7	Novogene	exon	12278979	12279513	.	+	.	nearest_ref "XR_105439.7"; exon_number "1"; gene_id "100503630"; transcript_name "TCONS_00015260"; gene_biotype "lncRNA"; class_code "j"; transcript_id "TCONS_00015260"; gene_name "Gm12002"; transcript_biotype "lincRNA"
NC_000077.7	Novogene	exon	12285751	12285904	.	+	.	nearest_ref "XR_105439.7"; exon_number "2"; gene_id "100503630"; transcript_name "TCONS_00015260"; gene_biotype "lncRNA"; class_code "j"; transcript_id "TCONS_00015260"; gene_name "Gm12002"; transcript_biotype "lincRNA"
NC_000077.7	Novogene	exon	21041324	21041476	.	+	.	nearest_ref "NM_023324.2"; exon_number "1"; gene_id "67245"; transcript_name "TCONS_00015278"; gene_biotype "protein_coding"; class_code "o"; transcript_id "TCONS_00015278"; gene_name "Peli1"; transcript_biotype "sense_overlapping"
NC_000077.7	Novogene	exon	21041577	21050616	.	+	.	nearest_ref "NM_023324.2"; exon_number "2"; gene_id "67245"; transcript_name "TCONS_00015278"; gene_biotype "protein_coding"; class_code "o"; transcript_id "TCONS_00015278"; gene_name "Peli1"; transcript_biotype "sense_overlapping"
NC_000077.7	Novogene	exon	31495756	31496001	.	+	.	exon_number "1"; gene_id "XLOC_009125"; transcript_name "TCONS_00015311"; gene_biotype "novel"; class_code "u"; transcript_id "TCONS_00015311"; gene_name "XLOC_009125"; transcript_biotype "lincRNA"
NC_000077.7	Novogene	exon	31498001	31499701	.	+	.	exon_number "2"; gene_id "XLOC_009125"; transcript_name "TCONS_00015311"; gene_biotype "novel"; class_code "u"; transcript_id "TCONS_00015311"; gene_name "XLOC_009125"; transcript_biotype "lincRNA"
NC_000077.7	Novogene	exon	68290349	68290612	.	+	.	nearest_ref "XR_879961.3"; exon_number "1"; gene_id "102634353"; transcript_name "TCONS_00015559"; gene_biotype "lncRNA"; class_code "j"; transcript_id "TCONS_00015559"; gene_name "Gm31954"; transcript_biotype "lincRNA"
NC_000077.7	Novogene	exon	68291355	68291449	.	+	.	nearest_ref "XR_879961.3"; exon_number "2"; gene_id "102634353"; transcript_name "TCONS_00015559"; gene_biotype "lncRNA"; class_code "j"; transcript_id "TCONS_00015559"; gene_name "Gm31954"; transcript_biotype "lincRNA"
NC_000077.7	Novogene	exon	68291886	68291994	.	+	.	nearest_ref "XR_879961.3"; exon_number "3"; gene_id "102634353"; transcript_name "TCONS_00015559"; gene_biotype "lncRNA"; class_code "j"; transcript_id "TCONS_00015559"; gene_name "Gm31954"; transcript_biotype "lincRNA"
NC_000077.7	Novogene	exon	85493210	85519400	.	+	.	nearest_ref "XR_001779924.3"; exon_number "1"; gene_id "192197"; transcript_name "TCONS_00015801"; gene_biotype "protein_coding"; class_code "j"; transcript_id "TCONS_00015801"; gene_name "Bcas3"; transcript_biotype "others"
NC_000077.7	Novogene	exon	85520695	85527085	.	+	.	nearest_ref "XR_001779924.3"; exon_number "2"; gene_id "192197"; transcript_name "TCONS_00015801"; gene_biotype "protein_coding"; class_code "j"; transcript_id "TCONS_00015801"; gene_name "Bcas3"; transcript_biotype "others"
NC_000077.7	Novogene	exon	85534251	85542140	.	+	.	nearest_ref "XM_030245680.2"; exon_number "1"; gene_id "192197"; transcript_name "TCONS_00015802"; gene_biotype "protein_coding"; class_code "i"; transcript_id "TCONS_00015802"; gene_name "Bcas3"; transcript_biotype "sense_intronic"
NC_000077.7	Novogene	exon	85542594	85556841	.	+	.	nearest_ref "XM_030245680.2"; exon_number "2"; gene_id "192197"; transcript_name "TCONS_00015802"; gene_biotype "protein_coding"; class_code "i"; transcript_id "TCONS_00015802"; gene_name "Bcas3"; transcript_biotype "sense_intronic"
NC_000077.7	Novogene	exon	107092722	107093044	.	+	.	nearest_ref "XR_880257.4"; exon_number "1"; gene_id "105243532"; transcript_name "TCONS_00016044"; gene_biotype "lncRNA"; class_code "j"; transcript_id "TCONS_00016044"; gene_name "Gm39425"; transcript_biotype "lincRNA"
NC_000077.7	Novogene	exon	107096038	107096210	.	+	.	nearest_ref "XR_880257.4"; exon_number "2"; gene_id "105243532"; transcript_name "TCONS_00016044"; gene_biotype "lncRNA"; class_code "j"; transcript_id "TCONS_00016044"; gene_name "Gm39425"; transcript_biotype "lincRNA"
NC_000077.7	Novogene	exon	107096510	107096665	.	+	.	nearest_ref "XR_880257.4"; exon_number "3"; gene_id "105243532"; transcript_name "TCONS_00016044"; gene_biotype "lncRNA"; class_code "j"; transcript_id "TCONS_00016044"; gene_name "Gm39425"; transcript_biotype "lincRNA"
NC_000077.7	Novogene	exon	107092722	107093044	.	+	.	nearest_ref "XR_880257.4"; exon_number "1"; gene_id "105243532"; transcript_name "TCONS_00016045"; gene_biotype "lncRNA"; class_code "j"; transcript_id "TCONS_00016045"; gene_name "Gm39425"; transcript_biotype "lincRNA"
NC_000077.7	Novogene	exon	107096038	107096239	.	+	.	nearest_ref "XR_880257.4"; exon_number "2"; gene_id "105243532"; transcript_name "TCONS_00016045"; gene_biotype "lncRNA"; class_code "j"; transcript_id "TCONS_00016045"; gene_name "Gm39425"; transcript_biotype "lincRNA"
NC_000077.7	Novogene	exon	107096510	107097137	.	+	.	nearest_ref "XR_880257.4"; exon_number "3"; gene_id "105243532"; transcript_name "TCONS_00016045"; gene_biotype "lncRNA"; class_code "j"; transcript_id "TCONS_00016045"; gene_name "Gm39425"; transcript_biotype "lincRNA"
NC_000077.7	Novogene	exon	107092737	107093044	.	+	.	nearest_ref "XR_880257.4"; exon_number "1"; gene_id "105243532"; transcript_name "TCONS_00016046"; gene_biotype "lncRNA"; class_code "j"; transcript_id "TCONS_00016046"; gene_name "Gm39425"; transcript_biotype "lincRNA"
NC_000077.7	Novogene	exon	107096038	107096239	.	+	.	nearest_ref "XR_880257.4"; exon_number "2"; gene_id "105243532"; transcript_name "TCONS_00016046"; gene_biotype "lncRNA"; class_code "j"; transcript_id "TCONS_00016046"; gene_name "Gm39425"; transcript_biotype "lincRNA"
NC_000077.7	Novogene	exon	107096513	107096662	.	+	.	nearest_ref "XR_880257.4"; exon_number "3"; gene_id "105243532"; transcript_name "TCONS_00016046"; gene_biotype "lncRNA"; class_code "j"; transcript_id "TCONS_00016046"; gene_name "Gm39425"; transcript_biotype "lincRNA"
NC_000077.7	Novogene	exon	117414334	117419929	.	+	.	nearest_ref "NR_167777.1"; exon_number "1"; gene_id "102638005"; transcript_name "TCONS_00016120"; gene_biotype "lncRNA"; class_code "j"; transcript_id "TCONS_00016120"; gene_name "Gm11734"; transcript_biotype "lincRNA"
NC_000077.7	Novogene	exon	117422466	117422659	.	+	.	nearest_ref "NR_167777.1"; exon_number "2"; gene_id "102638005"; transcript_name "TCONS_00016120"; gene_biotype "lncRNA"; class_code "j"; transcript_id "TCONS_00016120"; gene_name "Gm11734"; transcript_biotype "lincRNA"
NC_000077.7	Novogene	exon	117422910	117423095	.	+	.	nearest_ref "NR_167777.1"; exon_number "3"; gene_id "102638005"; transcript_name "TCONS_00016120"; gene_biotype "lncRNA"; class_code "j"; transcript_id "TCONS_00016120"; gene_name "Gm11734"; transcript_biotype "lincRNA"
NC_000077.7	Novogene	exon	117423338	117424813	.	+	.	nearest_ref "NR_167777.1"; exon_number "4"; gene_id "102638005"; transcript_name "TCONS_00016120"; gene_biotype "lncRNA"; class_code "j"; transcript_id "TCONS_00016120"; gene_name "Gm11734"; transcript_biotype "lincRNA"
NC_000077.7	Novogene	exon	119110963	119111169	.	+	.	nearest_ref "NM_172443.3"; exon_number "1"; gene_id "207592"; transcript_name "TCONS_00016132"; gene_biotype "protein_coding"; class_code "i"; transcript_id "TCONS_00016132"; gene_name "Tbc1d16"; transcript_biotype "sense_intronic"
NC_000077.7	Novogene	exon	119112974	119113617	.	+	.	nearest_ref "NM_172443.3"; exon_number "2"; gene_id "207592"; transcript_name "TCONS_00016132"; gene_biotype "protein_coding"; class_code "i"; transcript_id "TCONS_00016132"; gene_name "Tbc1d16"; transcript_biotype "sense_intronic"
NC_000077.7	Novogene	exon	120239532	120239688	.	+	.	nearest_ref "NR_038126.1"; exon_number "1"; gene_id "66838"; transcript_name "TCONS_00016148"; gene_biotype "lncRNA"; class_code "j"; transcript_id "TCONS_00016148"; gene_name "0610009L18Rik"; transcript_biotype "lincRNA"
NC_000077.7	Novogene	exon	120241586	120242016	.	+	.	nearest_ref "NR_038126.1"; exon_number "2"; gene_id "66838"; transcript_name "TCONS_00016148"; gene_biotype "lncRNA"; class_code "j"; transcript_id "TCONS_00016148"; gene_name "0610009L18Rik"; transcript_biotype "lincRNA"
NC_000077.7	Novogene	exon	3589785	3593179	.	-	.	nearest_ref "NR_002321.2"; exon_number "1"; gene_id "544752"; transcript_name "TCONS_00016201"; gene_biotype "lncRNA"; class_code "j"; transcript_id "TCONS_00016201"; gene_name "Tug1"; transcript_biotype "lincRNA"
NC_000077.7	Novogene	exon	3594772	3595523	.	-	.	nearest_ref "NR_002321.2"; exon_number "2"; gene_id "544752"; transcript_name "TCONS_00016201"; gene_biotype "lncRNA"; class_code "j"; transcript_id "TCONS_00016201"; gene_name "Tug1"; transcript_biotype "lincRNA"
NC_000077.7	Novogene	exon	3596557	3597494	.	-	.	nearest_ref "NR_002321.2"; exon_number "3"; gene_id "544752"; transcript_name "TCONS_00016201"; gene_biotype "lncRNA"; class_code "j"; transcript_id "TCONS_00016201"; gene_name "Tug1"; transcript_biotype "lincRNA"
NC_000077.7	Novogene	exon	3597533	3599048	.	-	.	nearest_ref "NR_002321.2"; exon_number "4"; gene_id "544752"; transcript_name "TCONS_00016201"; gene_biotype "lncRNA"; class_code "j"; transcript_id "TCONS_00016201"; gene_name "Tug1"; transcript_biotype "lincRNA"
NC_000077.7	Novogene	exon	5754833	5754856	.	-	.	exon_number "1"; gene_id "XLOC_009681"; transcript_name "TCONS_00016243"; gene_biotype "novel"; class_code "u"; transcript_id "TCONS_00016243"; gene_name "XLOC_009681"; transcript_biotype "lincRNA"
NC_000077.7	Novogene	exon	5768395	5768585	.	-	.	exon_number "2"; gene_id "XLOC_009681"; transcript_name "TCONS_00016243"; gene_biotype "novel"; class_code "u"; transcript_id "TCONS_00016243"; gene_name "XLOC_009681"; transcript_biotype "lincRNA"
NC_000077.7	Novogene	exon	8288704	8288788	.	-	.	exon_number "1"; gene_id "XLOC_009699"; transcript_name "TCONS_00016273"; gene_biotype "novel"; class_code "u"; transcript_id "TCONS_00016273"; gene_name "XLOC_009699"; transcript_biotype "lincRNA"
NC_000077.7	Novogene	exon	8288825	8289228	.	-	.	exon_number "2"; gene_id "XLOC_009699"; transcript_name "TCONS_00016273"; gene_biotype "novel"; class_code "u"; transcript_id "TCONS_00016273"; gene_name "XLOC_009699"; transcript_biotype "lincRNA"
NC_000077.7	Novogene	exon	11939986	11974362	.	-	.	nearest_ref "NM_001370603.1"; exon_number "1"; gene_id "14783"; transcript_name "TCONS_00016281"; gene_biotype "protein_coding"; class_code "i"; transcript_id "TCONS_00016281"; gene_name "Grb10"; transcript_biotype "sense_intronic"
NC_000077.7	Novogene	exon	11974498	11974539	.	-	.	nearest_ref "NM_001370603.1"; exon_number "2"; gene_id "14783"; transcript_name "TCONS_00016281"; gene_biotype "protein_coding"; class_code "i"; transcript_id "TCONS_00016281"; gene_name "Grb10"; transcript_biotype "sense_intronic"
NC_000077.7	Novogene	exon	31495762	31496001	.	-	.	exon_number "1"; gene_id "XLOC_009750"; transcript_name "TCONS_00016359"; gene_biotype "novel"; class_code "u"; transcript_id "TCONS_00016359"; gene_name "XLOC_009750"; transcript_biotype "lincRNA"
NC_000077.7	Novogene	exon	31498001	31499654	.	-	.	exon_number "2"; gene_id "XLOC_009750"; transcript_name "TCONS_00016359"; gene_biotype "novel"; class_code "u"; transcript_id "TCONS_00016359"; gene_name "XLOC_009750"; transcript_biotype "lincRNA"
NC_000077.7	Novogene	exon	60469739	60470033	.	-	.	exon_number "1"; gene_id "XLOC_009850"; transcript_name "TCONS_00016565"; gene_biotype "novel"; class_code "u"; transcript_id "TCONS_00016565"; gene_name "XLOC_009850"; transcript_biotype "lincRNA"
NC_000077.7	Novogene	exon	60476653	60476828	.	-	.	exon_number "2"; gene_id "XLOC_009850"; transcript_name "TCONS_00016565"; gene_biotype "novel"; class_code "u"; transcript_id "TCONS_00016565"; gene_name "XLOC_009850"; transcript_biotype "lincRNA"
NC_000077.7	Novogene	exon	65230158	65232484	.	-	.	exon_number "1"; gene_id "XLOC_009874"; transcript_name "TCONS_00016619"; gene_biotype "novel"; class_code "u"; transcript_id "TCONS_00016619"; gene_name "XLOC_009874"; transcript_biotype "lincRNA"
NC_000077.7	Novogene	exon	65256502	65256646	.	-	.	exon_number "2"; gene_id "XLOC_009874"; transcript_name "TCONS_00016619"; gene_biotype "novel"; class_code "u"; transcript_id "TCONS_00016619"; gene_name "XLOC_009874"; transcript_biotype "lincRNA"
NC_000077.7	Novogene	exon	84711554	84712583	.	-	.	nearest_ref "XR_003949360.2"; exon_number "1"; gene_id "192970"; transcript_name "TCONS_00016814"; gene_biotype "protein_coding"; class_code "j"; transcript_id "TCONS_00016814"; gene_name "Dhrs11"; transcript_biotype "others"
NC_000077.7	Novogene	exon	84713137	84716347	.	-	.	nearest_ref "XR_003949360.2"; exon_number "2"; gene_id "192970"; transcript_name "TCONS_00016814"; gene_biotype "protein_coding"; class_code "j"; transcript_id "TCONS_00016814"; gene_name "Dhrs11"; transcript_biotype "others"
NC_000077.7	Novogene	exon	84719577	84719829	.	-	.	nearest_ref "XR_003949360.2"; exon_number "3"; gene_id "192970"; transcript_name "TCONS_00016814"; gene_biotype "protein_coding"; class_code "j"; transcript_id "TCONS_00016814"; gene_name "Dhrs11"; transcript_biotype "others"
NC_000077.7	Novogene	exon	86702190	86706254	.	-	.	exon_number "1"; gene_id "XLOC_010021"; transcript_name "TCONS_00016843"; gene_biotype "novel"; class_code "u"; transcript_id "TCONS_00016843"; gene_name "XLOC_010021"; transcript_biotype "lincRNA"
NC_000077.7	Novogene	exon	86706293	86707193	.	-	.	exon_number "2"; gene_id "XLOC_010021"; transcript_name "TCONS_00016843"; gene_biotype "novel"; class_code "u"; transcript_id "TCONS_00016843"; gene_name "XLOC_010021"; transcript_biotype "lincRNA"
NC_000077.7	Novogene	exon	86702190	86706178	.	-	.	exon_number "1"; gene_id "XLOC_010021"; transcript_name "TCONS_00016842"; gene_biotype "novel"; class_code "u"; transcript_id "TCONS_00016842"; gene_name "XLOC_010021"; transcript_biotype "lincRNA"
NC_000077.7	Novogene	exon	86706255	86707193	.	-	.	exon_number "2"; gene_id "XLOC_010021"; transcript_name "TCONS_00016842"; gene_biotype "novel"; class_code "u"; transcript_id "TCONS_00016842"; gene_name "XLOC_010021"; transcript_biotype "lincRNA"
NC_000077.7	Novogene	exon	86702664	86706178	.	-	.	exon_number "1"; gene_id "XLOC_010021"; transcript_name "TCONS_00016844"; gene_biotype "novel"; class_code "u"; transcript_id "TCONS_00016844"; gene_name "XLOC_010021"; transcript_biotype "lincRNA"
NC_000077.7	Novogene	exon	86706293	86707145	.	-	.	exon_number "2"; gene_id "XLOC_010021"; transcript_name "TCONS_00016844"; gene_biotype "novel"; class_code "u"; transcript_id "TCONS_00016844"; gene_name "XLOC_010021"; transcript_biotype "lincRNA"
NC_000077.7	Novogene	exon	87870351	87870909	.	-	.	nearest_ref "NM_026556.4"; exon_number "1"; gene_id "68097"; transcript_name "TCONS_00016849"; gene_biotype "protein_coding"; class_code "o"; transcript_id "TCONS_00016849"; gene_name "Dynll2"; transcript_biotype "sense_overlapping"
NC_000077.7	Novogene	exon	87870984	87871706	.	-	.	nearest_ref "NM_026556.4"; exon_number "2"; gene_id "68097"; transcript_name "TCONS_00016849"; gene_biotype "protein_coding"; class_code "o"; transcript_id "TCONS_00016849"; gene_name "Dynll2"; transcript_biotype "sense_overlapping"
NC_000077.7	Novogene	exon	88583790	88583840	.	-	.	nearest_ref "XR_001780073.3"; exon_number "1"; gene_id "76626"; transcript_name "TCONS_00016864"; gene_biotype "protein_coding"; class_code "i"; transcript_id "TCONS_00016864"; gene_name "Msi2"; transcript_biotype "sense_intronic"
NC_000077.7	Novogene	exon	88583933	88588336	.	-	.	nearest_ref "XR_001780073.3"; exon_number "2"; gene_id "76626"; transcript_name "TCONS_00016864"; gene_biotype "protein_coding"; class_code "i"; transcript_id "TCONS_00016864"; gene_name "Msi2"; transcript_biotype "sense_intronic"
NC_000077.7	Novogene	exon	107248938	107253467	.	-	.	nearest_ref "NR_168694.1"; exon_number "1"; gene_id "108167930"; transcript_name "TCONS_00017100"; gene_biotype "lncRNA"; class_code "x"; transcript_id "TCONS_00017100"; gene_name "Gm11714"; transcript_biotype "antisense"
NC_000077.7	Novogene	exon	107307653	107319609	.	-	.	nearest_ref "NR_168694.1"; exon_number "2"; gene_id "108167930"; transcript_name "TCONS_00017100"; gene_biotype "lncRNA"; class_code "x"; transcript_id "TCONS_00017100"; gene_name "Gm11714"; transcript_biotype "antisense"
NC_000077.7	Novogene	exon	112934571	112935986	.	-	.	nearest_ref "NR_015556.2"; exon_number "1"; gene_id "72386"; transcript_name "TCONS_00017122"; gene_biotype "lncRNA"; class_code "j"; transcript_id "TCONS_00017122"; gene_name "2610035D17Rik"; transcript_biotype "lincRNA"
NC_000077.7	Novogene	exon	112958168	112958212	.	-	.	nearest_ref "NR_015556.2"; exon_number "2"; gene_id "72386"; transcript_name "TCONS_00017122"; gene_biotype "lncRNA"; class_code "j"; transcript_id "TCONS_00017122"; gene_name "2610035D17Rik"; transcript_biotype "lincRNA"
NC_000077.7	Novogene	exon	113063779	113064112	.	-	.	nearest_ref "NR_015556.2"; exon_number "3"; gene_id "72386"; transcript_name "TCONS_00017122"; gene_biotype "lncRNA"; class_code "j"; transcript_id "TCONS_00017122"; gene_name "2610035D17Rik"; transcript_biotype "lincRNA"
NC_000078.7	Novogene	exon	3862279	3873191	.	+	.	nearest_ref "XM_030246540.2"; exon_number "1"; gene_id "13435"; transcript_name "TCONS_00017276"; gene_biotype "protein_coding"; class_code "o"; transcript_id "TCONS_00017276"; gene_name "Dnmt3a"; transcript_biotype "sense_overlapping"
NC_000078.7	Novogene	exon	3874745	3884123	.	+	.	nearest_ref "XM_030246540.2"; exon_number "2"; gene_id "13435"; transcript_name "TCONS_00017276"; gene_biotype "protein_coding"; class_code "o"; transcript_id "TCONS_00017276"; gene_name "Dnmt3a"; transcript_biotype "sense_overlapping"
NC_000078.7	Novogene	exon	3862303	3873177	.	+	.	nearest_ref "XM_030246540.2"; exon_number "1"; gene_id "13435"; transcript_name "TCONS_00017277"; gene_biotype "protein_coding"; class_code "o"; transcript_id "TCONS_00017277"; gene_name "Dnmt3a"; transcript_biotype "sense_overlapping"
NC_000078.7	Novogene	exon	3874741	3884153	.	+	.	nearest_ref "XM_030246540.2"; exon_number "2"; gene_id "13435"; transcript_name "TCONS_00017277"; gene_biotype "protein_coding"; class_code "o"; transcript_id "TCONS_00017277"; gene_name "Dnmt3a"; transcript_biotype "sense_overlapping"
NC_000078.7	Novogene	exon	35097200	35097410	.	+	.	nearest_ref "XM_006515062.5"; exon_number "1"; gene_id "217463"; transcript_name "TCONS_00017393"; gene_biotype "protein_coding"; class_code "j"; transcript_id "TCONS_00017393"; gene_name "Snx13"; transcript_biotype "others"
NC_000078.7	Novogene	exon	35118739	35123514	.	+	.	nearest_ref "XM_006515062.5"; exon_number "2"; gene_id "217463"; transcript_name "TCONS_00017393"; gene_biotype "protein_coding"; class_code "j"; transcript_id "TCONS_00017393"; gene_name "Snx13"; transcript_biotype "others"
NC_000078.7	Novogene	exon	69165687	69165706	.	+	.	nearest_ref "NR_168640.1"; exon_number "1"; gene_id "102633682"; transcript_name "TCONS_00017475"; gene_biotype "lncRNA"; class_code "o"; transcript_id "TCONS_00017475"; gene_name "Gm31447"; transcript_biotype "sense_overlapping"
NC_000078.7	Novogene	exon	69206123	69206367	.	+	.	nearest_ref "NR_168640.1"; exon_number "2"; gene_id "102633682"; transcript_name "TCONS_00017475"; gene_biotype "lncRNA"; class_code "o"; transcript_id "TCONS_00017475"; gene_name "Gm31447"; transcript_biotype "sense_overlapping"
NC_000078.7	Novogene	exon	70696523	70697011	.	+	.	nearest_ref "XR_381651.4"; exon_number "1"; gene_id "102634964"; transcript_name "TCONS_00017490"; gene_biotype "lncRNA"; class_code "j"; transcript_id "TCONS_00017490"; gene_name "Gm24474"; transcript_biotype "lincRNA"
NC_000078.7	Novogene	exon	70697279	70698492	.	+	.	nearest_ref "XR_381651.4"; exon_number "2"; gene_id "102634964"; transcript_name "TCONS_00017490"; gene_biotype "lncRNA"; class_code "j"; transcript_id "TCONS_00017490"; gene_name "Gm24474"; transcript_biotype "lincRNA"
NC_000078.7	Novogene	exon	70740234	70740858	.	+	.	nearest_ref "XR_381651.4"; exon_number "3"; gene_id "102634964"; transcript_name "TCONS_00017490"; gene_biotype "lncRNA"; class_code "j"; transcript_id "TCONS_00017490"; gene_name "Gm24474"; transcript_biotype "lincRNA"
NC_000078.7	Novogene	exon	70696735	70697011	.	+	.	nearest_ref "XR_381651.4"; exon_number "1"; gene_id "102634964"; transcript_name "TCONS_00017492"; gene_biotype "lncRNA"; class_code "j"; transcript_id "TCONS_00017492"; gene_name "Gm24474"; transcript_biotype "lincRNA"
NC_000078.7	Novogene	exon	70698401	70698492	.	+	.	nearest_ref "XR_381651.4"; exon_number "2"; gene_id "102634964"; transcript_name "TCONS_00017492"; gene_biotype "lncRNA"; class_code "j"; transcript_id "TCONS_00017492"; gene_name "Gm24474"; transcript_biotype "lincRNA"
NC_000078.7	Novogene	exon	70740234	70743978	.	+	.	nearest_ref "XR_381651.4"; exon_number "3"; gene_id "102634964"; transcript_name "TCONS_00017492"; gene_biotype "lncRNA"; class_code "j"; transcript_id "TCONS_00017492"; gene_name "Gm24474"; transcript_biotype "lincRNA"
NC_000078.7	Novogene	exon	70696735	70697011	.	+	.	nearest_ref "XR_381651.4"; exon_number "1"; gene_id "102634964"; transcript_name "TCONS_00017491"; gene_biotype "lncRNA"; class_code "j"; transcript_id "TCONS_00017491"; gene_name "Gm24474"; transcript_biotype "lincRNA"
NC_000078.7	Novogene	exon	70740234	70743978	.	+	.	nearest_ref "XR_381651.4"; exon_number "2"; gene_id "102634964"; transcript_name "TCONS_00017491"; gene_biotype "lncRNA"; class_code "j"; transcript_id "TCONS_00017491"; gene_name "Gm24474"; transcript_biotype "lincRNA"
NC_000078.7	Novogene	exon	73841303	73841489	.	+	.	nearest_ref "XR_381690.1"; exon_number "1"; gene_id "666385"; transcript_name "TCONS_00017517"; gene_biotype "lncRNA"; class_code "j"; transcript_id "TCONS_00017517"; gene_name "Gm8075"; transcript_biotype "lincRNA"
NC_000078.7	Novogene	exon	73854903	73855145	.	+	.	nearest_ref "XR_381690.1"; exon_number "2"; gene_id "666385"; transcript_name "TCONS_00017517"; gene_biotype "lncRNA"; class_code "j"; transcript_id "TCONS_00017517"; gene_name "Gm8075"; transcript_biotype "lincRNA"
NC_000078.7	Novogene	exon	73841303	73841489	.	+	.	nearest_ref "XR_381690.1"; exon_number "1"; gene_id "666385"; transcript_name "TCONS_00017516"; gene_biotype "lncRNA"; class_code "j"; transcript_id "TCONS_00017516"; gene_name "Gm8075"; transcript_biotype "lincRNA"
NC_000078.7	Novogene	exon	73846683	73846745	.	+	.	nearest_ref "XR_381690.1"; exon_number "2"; gene_id "666385"; transcript_name "TCONS_00017516"; gene_biotype "lncRNA"; class_code "j"; transcript_id "TCONS_00017516"; gene_name "Gm8075"; transcript_biotype "lincRNA"
NC_000078.7	Novogene	exon	73854903	73855145	.	+	.	nearest_ref "XR_381690.1"; exon_number "3"; gene_id "666385"; transcript_name "TCONS_00017516"; gene_biotype "lncRNA"; class_code "j"; transcript_id "TCONS_00017516"; gene_name "Gm8075"; transcript_biotype "lincRNA"
NC_000078.7	Novogene	exon	83583633	83583668	.	+	.	nearest_ref "XM_036157596.1"; exon_number "1"; gene_id "67039"; transcript_name "TCONS_00017573"; gene_biotype "protein_coding"; class_code "o"; transcript_id "TCONS_00017573"; gene_name "Rbm25"; transcript_biotype "sense_overlapping"
NC_000078.7	Novogene	exon	83687032	83688237	.	+	.	nearest_ref "XM_036157596.1"; exon_number "2"; gene_id "67039"; transcript_name "TCONS_00017573"; gene_biotype "protein_coding"; class_code "o"; transcript_id "TCONS_00017573"; gene_name "Rbm25"; transcript_biotype "sense_overlapping"
NC_000078.7	Novogene	exon	86407921	86408312	.	+	.	nearest_ref "NM_001159500.1"; exon_number "1"; gene_id "26380"; transcript_name "TCONS_00017619"; gene_biotype "protein_coding"; class_code "j"; transcript_id "TCONS_00017619"; gene_name "Esrrb"; transcript_biotype "others"
NC_000078.7	Novogene	exon	86458592	86460302	.	+	.	nearest_ref "NM_001159500.1"; exon_number "2"; gene_id "26380"; transcript_name "TCONS_00017619"; gene_biotype "protein_coding"; class_code "j"; transcript_id "TCONS_00017619"; gene_name "Esrrb"; transcript_biotype "others"
NC_000078.7	Novogene	exon	109506895	109506982	.	+	.	nearest_ref "NR_027652.1"; exon_number "1"; gene_id "17263"; transcript_name "TCONS_00017683"; gene_biotype "lncRNA"; class_code "j"; transcript_id "TCONS_00017683"; gene_name "Meg3"; transcript_biotype "lincRNA"
NC_000078.7	Novogene	exon	109509583	109509688	.	+	.	nearest_ref "NR_027652.1"; exon_number "2"; gene_id "17263"; transcript_name "TCONS_00017683"; gene_biotype "lncRNA"; class_code "j"; transcript_id "TCONS_00017683"; gene_name "Meg3"; transcript_biotype "lincRNA"
NC_000078.7	Novogene	exon	109509910	109515806	.	+	.	nearest_ref "NR_027652.1"; exon_number "3"; gene_id "17263"; transcript_name "TCONS_00017683"; gene_biotype "lncRNA"; class_code "j"; transcript_id "TCONS_00017683"; gene_name "Meg3"; transcript_biotype "lincRNA"
NC_000078.7	Novogene	exon	109515914	109515987	.	+	.	nearest_ref "NR_027652.1"; exon_number "4"; gene_id "17263"; transcript_name "TCONS_00017683"; gene_biotype "lncRNA"; class_code "j"; transcript_id "TCONS_00017683"; gene_name "Meg3"; transcript_biotype "lincRNA"
NC_000078.7	Novogene	exon	109516088	109516245	.	+	.	nearest_ref "NR_027652.1"; exon_number "5"; gene_id "17263"; transcript_name "TCONS_00017683"; gene_biotype "lncRNA"; class_code "j"; transcript_id "TCONS_00017683"; gene_name "Meg3"; transcript_biotype "lincRNA"
NC_000078.7	Novogene	exon	109524671	109524754	.	+	.	nearest_ref "NR_027652.1"; exon_number "6"; gene_id "17263"; transcript_name "TCONS_00017683"; gene_biotype "lncRNA"; class_code "j"; transcript_id "TCONS_00017683"; gene_name "Meg3"; transcript_biotype "lincRNA"
NC_000078.7	Novogene	exon	109537825	109538370	.	+	.	nearest_ref "NR_027652.1"; exon_number "7"; gene_id "17263"; transcript_name "TCONS_00017683"; gene_biotype "lncRNA"; class_code "j"; transcript_id "TCONS_00017683"; gene_name "Meg3"; transcript_biotype "lincRNA"
NC_000078.7	Novogene	exon	110491430	110492505	.	+	.	nearest_ref "XM_006515924.4"; exon_number "1"; gene_id "26931"; transcript_name "TCONS_00017691"; gene_biotype "protein_coding"; class_code "i"; transcript_id "TCONS_00017691"; gene_name "Ppp2r5c"; transcript_biotype "sense_intronic"
NC_000078.7	Novogene	exon	110498359	110503256	.	+	.	nearest_ref "XM_006515924.4"; exon_number "2"; gene_id "26931"; transcript_name "TCONS_00017691"; gene_biotype "protein_coding"; class_code "i"; transcript_id "TCONS_00017691"; gene_name "Ppp2r5c"; transcript_biotype "sense_intronic"
NC_000078.7	Novogene	exon	16186409	16197115	.	-	.	nearest_ref "XR_381301.5"; exon_number "1"; gene_id "102640260"; transcript_name "TCONS_00017785"; gene_biotype "lncRNA"; class_code "j"; transcript_id "TCONS_00017785"; gene_name "Gm36372"; transcript_biotype "lincRNA"
NC_000078.7	Novogene	exon	16271210	16271376	.	-	.	nearest_ref "XR_381301.5"; exon_number "2"; gene_id "102640260"; transcript_name "TCONS_00017785"; gene_biotype "lncRNA"; class_code "j"; transcript_id "TCONS_00017785"; gene_name "Gm36372"; transcript_biotype "lincRNA"
NC_000078.7	Novogene	exon	16255071	16255357	.	-	.	nearest_ref "XR_381302.5"; exon_number "1"; gene_id "102640260"; transcript_name "TCONS_00017789"; gene_biotype "lncRNA"; class_code "j"; transcript_id "TCONS_00017789"; gene_name "Gm36372"; transcript_biotype "lincRNA"
NC_000078.7	Novogene	exon	16266284	16266406	.	-	.	nearest_ref "XR_381302.5"; exon_number "2"; gene_id "102640260"; transcript_name "TCONS_00017789"; gene_biotype "lncRNA"; class_code "j"; transcript_id "TCONS_00017789"; gene_name "Gm36372"; transcript_biotype "lincRNA"
NC_000078.7	Novogene	exon	16271210	16271376	.	-	.	nearest_ref "XR_381302.5"; exon_number "3"; gene_id "102640260"; transcript_name "TCONS_00017789"; gene_biotype "lncRNA"; class_code "j"; transcript_id "TCONS_00017789"; gene_name "Gm36372"; transcript_biotype "lincRNA"
NC_000078.7	Novogene	exon	37142977	37149150	.	-	.	nearest_ref "NR_166883.1"; exon_number "1"; gene_id "105244862"; transcript_name "TCONS_00017850"; gene_biotype "lncRNA"; class_code "j"; transcript_id "TCONS_00017850"; gene_name "Gm29007"; transcript_biotype "lincRNA"
NC_000078.7	Novogene	exon	37156712	37156740	.	-	.	nearest_ref "NR_166883.1"; exon_number "2"; gene_id "105244862"; transcript_name "TCONS_00017850"; gene_biotype "lncRNA"; class_code "j"; transcript_id "TCONS_00017850"; gene_name "Gm29007"; transcript_biotype "lincRNA"
NC_000078.7	Novogene	exon	69168789	69168815	.	-	.	nearest_ref "XM_030246848.2"; exon_number "1"; gene_id "66244"; transcript_name "TCONS_00017915"; gene_biotype "protein_coding"; class_code "o"; transcript_id "TCONS_00017915"; gene_name "Nemf"; transcript_biotype "sense_overlapping"
NC_000078.7	Novogene	exon	69206123	69206241	.	-	.	nearest_ref "XM_030246848.2"; exon_number "2"; gene_id "66244"; transcript_name "TCONS_00017915"; gene_biotype "protein_coding"; class_code "o"; transcript_id "TCONS_00017915"; gene_name "Nemf"; transcript_biotype "sense_overlapping"
NC_000078.7	Novogene	exon	69408036	69408255	.	-	.	nearest_ref "XM_030246848.2"; exon_number "3"; gene_id "66244"; transcript_name "TCONS_00017915"; gene_biotype "protein_coding"; class_code "o"; transcript_id "TCONS_00017915"; gene_name "Nemf"; transcript_biotype "sense_overlapping"
NC_000078.7	Novogene	exon	73439092	73439647	.	-	.	nearest_ref "NR_046013.1"; exon_number "1"; gene_id "380765"; transcript_name "TCONS_00017942"; gene_biotype "lncRNA"; class_code "j"; transcript_id "TCONS_00017942"; gene_name "D830013O20Rik"; transcript_biotype "lincRNA"
NC_000078.7	Novogene	exon	73443103	73443253	.	-	.	nearest_ref "NR_046013.1"; exon_number "2"; gene_id "380765"; transcript_name "TCONS_00017942"; gene_biotype "lncRNA"; class_code "j"; transcript_id "TCONS_00017942"; gene_name "D830013O20Rik"; transcript_biotype "lincRNA"
NC_000078.7	Novogene	exon	73456177	73456386	.	-	.	nearest_ref "NR_046013.1"; exon_number "3"; gene_id "380765"; transcript_name "TCONS_00017942"; gene_biotype "lncRNA"; class_code "j"; transcript_id "TCONS_00017942"; gene_name "D830013O20Rik"; transcript_biotype "lincRNA"
NC_000078.7	Novogene	exon	75579416	75584500	.	-	.	nearest_ref "XM_006515927.5"; exon_number "1"; gene_id "26932"; transcript_name "TCONS_00017946"; gene_biotype "protein_coding"; class_code "o"; transcript_id "TCONS_00017946"; gene_name "Ppp2r5e"; transcript_biotype "sense_overlapping"
NC_000078.7	Novogene	exon	75609824	75627105	.	-	.	nearest_ref "XM_006515927.5"; exon_number "2"; gene_id "26932"; transcript_name "TCONS_00017946"; gene_biotype "protein_coding"; class_code "o"; transcript_id "TCONS_00017946"; gene_name "Ppp2r5e"; transcript_biotype "sense_overlapping"
NC_000078.7	Novogene	exon	75627519	75638028	.	-	.	nearest_ref "XM_006515927.5"; exon_number "3"; gene_id "26932"; transcript_name "TCONS_00017946"; gene_biotype "protein_coding"; class_code "o"; transcript_id "TCONS_00017946"; gene_name "Ppp2r5e"; transcript_biotype "sense_overlapping"
NC_000078.7	Novogene	exon	104891758	104893124	.	-	.	nearest_ref "NM_001042699.2"; exon_number "1"; gene_id "212073"; transcript_name "TCONS_00018088"; gene_biotype "protein_coding"; class_code "o"; transcript_id "TCONS_00018088"; gene_name "Syne3"; transcript_biotype "sense_overlapping"
NC_000078.7	Novogene	exon	104901832	104902042	.	-	.	nearest_ref "NM_001042699.2"; exon_number "2"; gene_id "212073"; transcript_name "TCONS_00018088"; gene_biotype "protein_coding"; class_code "o"; transcript_id "TCONS_00018088"; gene_name "Syne3"; transcript_biotype "sense_overlapping"
NC_000079.7	Novogene	exon	12988022	12989651	.	+	.	nearest_ref "XM_011244260.3"; exon_number "1"; gene_id "107849"; transcript_name "TCONS_00018185"; gene_biotype "protein_coding"; class_code "o"; transcript_id "TCONS_00018185"; gene_name "Prl2c5"; transcript_biotype "sense_overlapping"
NC_000079.7	Novogene	exon	13448477	13448597	.	+	.	nearest_ref "XM_011244260.3"; exon_number "2"; gene_id "107849"; transcript_name "TCONS_00018185"; gene_biotype "protein_coding"; class_code "o"; transcript_id "TCONS_00018185"; gene_name "Prl2c5"; transcript_biotype "sense_overlapping"
NC_000079.7	Novogene	exon	13117138	13118646	.	+	.	nearest_ref "XM_011244260.3"; exon_number "1"; gene_id "107849"; transcript_name "TCONS_00018186"; gene_biotype "protein_coding"; class_code "o"; transcript_id "TCONS_00018186"; gene_name "Prl2c5"; transcript_biotype "sense_overlapping"
NC_000079.7	Novogene	exon	13420950	13421107	.	+	.	nearest_ref "XM_011244260.3"; exon_number "2"; gene_id "107849"; transcript_name "TCONS_00018186"; gene_biotype "protein_coding"; class_code "o"; transcript_id "TCONS_00018186"; gene_name "Prl2c5"; transcript_biotype "sense_overlapping"
NC_000079.7	Novogene	exon	13120761	13121043	.	+	.	nearest_ref "XM_011244260.3"; exon_number "1"; gene_id "107849"; transcript_name "TCONS_00018187"; gene_biotype "protein_coding"; class_code "o"; transcript_id "TCONS_00018187"; gene_name "Prl2c5"; transcript_biotype "sense_overlapping"
NC_000079.7	Novogene	exon	13423352	13423559	.	+	.	nearest_ref "XM_011244260.3"; exon_number "2"; gene_id "107849"; transcript_name "TCONS_00018187"; gene_biotype "protein_coding"; class_code "o"; transcript_id "TCONS_00018187"; gene_name "Prl2c5"; transcript_biotype "sense_overlapping"
NC_000079.7	Novogene	exon	13120766	13124470	.	+	.	nearest_ref "XM_011244260.3"; exon_number "1"; gene_id "107849"; transcript_name "TCONS_00018188"; gene_biotype "protein_coding"; class_code "o"; transcript_id "TCONS_00018188"; gene_name "Prl2c5"; transcript_biotype "sense_overlapping"
NC_000079.7	Novogene	exon	13426769	13427058	.	+	.	nearest_ref "XM_011244260.3"; exon_number "2"; gene_id "107849"; transcript_name "TCONS_00018188"; gene_biotype "protein_coding"; class_code "o"; transcript_id "TCONS_00018188"; gene_name "Prl2c5"; transcript_biotype "sense_overlapping"
NC_000079.7	Novogene	exon	53155910	53156364	.	+	.	nearest_ref "XR_382381.4"; exon_number "1"; gene_id "102636324"; transcript_name "TCONS_00018352"; gene_biotype "lncRNA"; class_code "j"; transcript_id "TCONS_00018352"; gene_name "Gm33424"; transcript_biotype "lincRNA"
NC_000079.7	Novogene	exon	53170238	53170319	.	+	.	nearest_ref "XR_382381.4"; exon_number "2"; gene_id "102636324"; transcript_name "TCONS_00018352"; gene_biotype "lncRNA"; class_code "j"; transcript_id "TCONS_00018352"; gene_name "Gm33424"; transcript_biotype "lincRNA"
NC_000079.7	Novogene	exon	53172047	53172525	.	+	.	nearest_ref "XR_382381.4"; exon_number "3"; gene_id "102636324"; transcript_name "TCONS_00018352"; gene_biotype "lncRNA"; class_code "j"; transcript_id "TCONS_00018352"; gene_name "Gm33424"; transcript_biotype "lincRNA"
NC_000079.7	Novogene	exon	64396514	64397017	.	+	.	nearest_ref "NR_045798.1"; exon_number "1"; gene_id "66503"; transcript_name "TCONS_00018409"; gene_biotype "lncRNA"; class_code "j"; transcript_id "TCONS_00018409"; gene_name "1810034E14Rik"; transcript_biotype "lincRNA"
NC_000079.7	Novogene	exon	64414256	64414363	.	+	.	nearest_ref "NR_045798.1"; exon_number "2"; gene_id "66503"; transcript_name "TCONS_00018409"; gene_biotype "lncRNA"; class_code "j"; transcript_id "TCONS_00018409"; gene_name "1810034E14Rik"; transcript_biotype "lincRNA"
NC_000079.7	Novogene	exon	64414835	64415959	.	+	.	nearest_ref "NR_045798.1"; exon_number "3"; gene_id "66503"; transcript_name "TCONS_00018409"; gene_biotype "lncRNA"; class_code "j"; transcript_id "TCONS_00018409"; gene_name "1810034E14Rik"; transcript_biotype "lincRNA"
NC_000079.7	Novogene	exon	83746652	83747894	.	+	.	nearest_ref "XM_006517123.4"; exon_number "1"; gene_id "17260"; transcript_name "TCONS_00018472"; gene_biotype "protein_coding"; class_code "o"; transcript_id "TCONS_00018472"; gene_name "Mef2c"; transcript_biotype "sense_overlapping"
NC_000079.7	Novogene	exon	83810854	83814462	.	+	.	nearest_ref "XM_006517123.4"; exon_number "2"; gene_id "17260"; transcript_name "TCONS_00018472"; gene_biotype "protein_coding"; class_code "o"; transcript_id "TCONS_00018472"; gene_name "Mef2c"; transcript_biotype "sense_overlapping"
NC_000079.7	Novogene	exon	102486218	102486298	.	+	.	nearest_ref "XR_382833.4"; exon_number "1"; gene_id "102640697"; transcript_name "TCONS_00018526"; gene_biotype "lncRNA"; class_code "j"; transcript_id "TCONS_00018526"; gene_name "Gm36703"; transcript_biotype "lincRNA"
NC_000079.7	Novogene	exon	102492677	102497492	.	+	.	nearest_ref "XR_382833.4"; exon_number "2"; gene_id "102640697"; transcript_name "TCONS_00018526"; gene_biotype "lncRNA"; class_code "j"; transcript_id "TCONS_00018526"; gene_name "Gm36703"; transcript_biotype "lincRNA"
NC_000079.7	Novogene	exon	102486218	102486298	.	+	.	nearest_ref "XR_382833.4"; exon_number "1"; gene_id "102640697"; transcript_name "TCONS_00018527"; gene_biotype "lncRNA"; class_code "j"; transcript_id "TCONS_00018527"; gene_name "Gm36703"; transcript_biotype "lincRNA"
NC_000079.7	Novogene	exon	102488499	102488605	.	+	.	nearest_ref "XR_382833.4"; exon_number "2"; gene_id "102640697"; transcript_name "TCONS_00018527"; gene_biotype "lncRNA"; class_code "j"; transcript_id "TCONS_00018527"; gene_name "Gm36703"; transcript_biotype "lincRNA"
NC_000079.7	Novogene	exon	102492677	102499457	.	+	.	nearest_ref "XR_382833.4"; exon_number "3"; gene_id "102640697"; transcript_name "TCONS_00018527"; gene_biotype "lncRNA"; class_code "j"; transcript_id "TCONS_00018527"; gene_name "Gm36703"; transcript_biotype "lincRNA"
NC_000079.7	Novogene	exon	102486222	102486298	.	+	.	nearest_ref "XR_382833.4"; exon_number "1"; gene_id "102640697"; transcript_name "TCONS_00018528"; gene_biotype "lncRNA"; class_code "j"; transcript_id "TCONS_00018528"; gene_name "Gm36703"; transcript_biotype "lincRNA"
NC_000079.7	Novogene	exon	102487713	102487924	.	+	.	nearest_ref "XR_382833.4"; exon_number "2"; gene_id "102640697"; transcript_name "TCONS_00018528"; gene_biotype "lncRNA"; class_code "j"; transcript_id "TCONS_00018528"; gene_name "Gm36703"; transcript_biotype "lincRNA"
NC_000079.7	Novogene	exon	102488499	102488605	.	+	.	nearest_ref "XR_382833.4"; exon_number "3"; gene_id "102640697"; transcript_name "TCONS_00018528"; gene_biotype "lncRNA"; class_code "j"; transcript_id "TCONS_00018528"; gene_name "Gm36703"; transcript_biotype "lincRNA"
NC_000079.7	Novogene	exon	102492677	102497905	.	+	.	nearest_ref "XR_382833.4"; exon_number "4"; gene_id "102640697"; transcript_name "TCONS_00018528"; gene_biotype "lncRNA"; class_code "j"; transcript_id "TCONS_00018528"; gene_name "Gm36703"; transcript_biotype "lincRNA"
NC_000079.7	Novogene	exon	102486238	102486298	.	+	.	nearest_ref "XR_382833.4"; exon_number "1"; gene_id "102640697"; transcript_name "TCONS_00018529"; gene_biotype "lncRNA"; class_code "j"; transcript_id "TCONS_00018529"; gene_name "Gm36703"; transcript_biotype "lincRNA"
NC_000079.7	Novogene	exon	102487713	102487924	.	+	.	nearest_ref "XR_382833.4"; exon_number "2"; gene_id "102640697"; transcript_name "TCONS_00018529"; gene_biotype "lncRNA"; class_code "j"; transcript_id "TCONS_00018529"; gene_name "Gm36703"; transcript_biotype "lincRNA"
NC_000079.7	Novogene	exon	102488499	102488605	.	+	.	nearest_ref "XR_382833.4"; exon_number "3"; gene_id "102640697"; transcript_name "TCONS_00018529"; gene_biotype "lncRNA"; class_code "j"; transcript_id "TCONS_00018529"; gene_name "Gm36703"; transcript_biotype "lincRNA"
NC_000079.7	Novogene	exon	102488971	102489036	.	+	.	nearest_ref "XR_382833.4"; exon_number "4"; gene_id "102640697"; transcript_name "TCONS_00018529"; gene_biotype "lncRNA"; class_code "j"; transcript_id "TCONS_00018529"; gene_name "Gm36703"; transcript_biotype "lincRNA"
NC_000079.7	Novogene	exon	102492677	102496757	.	+	.	nearest_ref "XR_382833.4"; exon_number "5"; gene_id "102640697"; transcript_name "TCONS_00018529"; gene_biotype "lncRNA"; class_code "j"; transcript_id "TCONS_00018529"; gene_name "Gm36703"; transcript_biotype "lincRNA"
NC_000079.7	Novogene	exon	102487861	102487924	.	+	.	nearest_ref "XR_382833.4"; exon_number "1"; gene_id "102640697"; transcript_name "TCONS_00018530"; gene_biotype "lncRNA"; class_code "j"; transcript_id "TCONS_00018530"; gene_name "Gm36703"; transcript_biotype "lincRNA"
NC_000079.7	Novogene	exon	102488499	102488605	.	+	.	nearest_ref "XR_382833.4"; exon_number "2"; gene_id "102640697"; transcript_name "TCONS_00018530"; gene_biotype "lncRNA"; class_code "j"; transcript_id "TCONS_00018530"; gene_name "Gm36703"; transcript_biotype "lincRNA"
NC_000079.7	Novogene	exon	102492677	102493623	.	+	.	nearest_ref "XR_382833.4"; exon_number "3"; gene_id "102640697"; transcript_name "TCONS_00018530"; gene_biotype "lncRNA"; class_code "j"; transcript_id "TCONS_00018530"; gene_name "Gm36703"; transcript_biotype "lincRNA"
NC_000079.7	Novogene	exon	102493734	102497227	.	+	.	nearest_ref "XR_382833.4"; exon_number "4"; gene_id "102640697"; transcript_name "TCONS_00018530"; gene_biotype "lncRNA"; class_code "j"; transcript_id "TCONS_00018530"; gene_name "Gm36703"; transcript_biotype "lincRNA"
NC_000079.7	Novogene	exon	108586147	108586602	.	+	.	nearest_ref "NM_011056.3"; exon_number "1"; gene_id "238871"; transcript_name "TCONS_00018554"; gene_biotype "protein_coding"; class_code "j"; transcript_id "TCONS_00018554"; gene_name "Pde4d"; transcript_biotype "others"
NC_000079.7	Novogene	exon	108673299	108673380	.	+	.	nearest_ref "NM_011056.3"; exon_number "2"; gene_id "238871"; transcript_name "TCONS_00018554"; gene_biotype "protein_coding"; class_code "j"; transcript_id "TCONS_00018554"; gene_name "Pde4d"; transcript_biotype "others"
NC_000079.7	Novogene	exon	108790639	108790799	.	+	.	nearest_ref "NM_011056.3"; exon_number "3"; gene_id "238871"; transcript_name "TCONS_00018554"; gene_biotype "protein_coding"; class_code "j"; transcript_id "TCONS_00018554"; gene_name "Pde4d"; transcript_biotype "others"
NC_000079.7	Novogene	exon	108822528	108822627	.	+	.	nearest_ref "NM_011056.3"; exon_number "4"; gene_id "238871"; transcript_name "TCONS_00018554"; gene_biotype "protein_coding"; class_code "j"; transcript_id "TCONS_00018554"; gene_name "Pde4d"; transcript_biotype "others"
NC_000079.7	Novogene	exon	108996609	108996741	.	+	.	nearest_ref "NM_011056.3"; exon_number "5"; gene_id "238871"; transcript_name "TCONS_00018554"; gene_biotype "protein_coding"; class_code "j"; transcript_id "TCONS_00018554"; gene_name "Pde4d"; transcript_biotype "others"
NC_000079.7	Novogene	exon	109115343	109117765	.	+	.	nearest_ref "NM_011056.3"; exon_number "6"; gene_id "238871"; transcript_name "TCONS_00018554"; gene_biotype "protein_coding"; class_code "j"; transcript_id "TCONS_00018554"; gene_name "Pde4d"; transcript_biotype "others"
NC_000079.7	Novogene	exon	108645432	108645926	.	+	.	exon_number "1"; gene_id "XLOC_011116"; transcript_name "TCONS_00018557"; gene_biotype "novel"; class_code "u"; transcript_id "TCONS_00018557"; gene_name "XLOC_011116"; transcript_biotype "lincRNA"
NC_000079.7	Novogene	exon	108646351	108650342	.	+	.	exon_number "2"; gene_id "XLOC_011116"; transcript_name "TCONS_00018557"; gene_biotype "novel"; class_code "u"; transcript_id "TCONS_00018557"; gene_name "XLOC_011116"; transcript_biotype "lincRNA"
NC_000079.7	Novogene	exon	108645460	108645926	.	+	.	exon_number "1"; gene_id "XLOC_011116"; transcript_name "TCONS_00018558"; gene_biotype "novel"; class_code "u"; transcript_id "TCONS_00018558"; gene_name "XLOC_011116"; transcript_biotype "lincRNA"
NC_000079.7	Novogene	exon	108646139	108650329	.	+	.	exon_number "2"; gene_id "XLOC_011116"; transcript_name "TCONS_00018558"; gene_biotype "novel"; class_code "u"; transcript_id "TCONS_00018558"; gene_name "XLOC_011116"; transcript_biotype "lincRNA"
NC_000079.7	Novogene	exon	114174514	114176744	.	+	.	nearest_ref "XM_030247239.2"; exon_number "1"; gene_id "218639"; transcript_name "TCONS_00018583"; gene_biotype "protein_coding"; class_code "i"; transcript_id "TCONS_00018583"; gene_name "Arl15"; transcript_biotype "sense_intronic"
NC_000079.7	Novogene	exon	114182688	114186461	.	+	.	nearest_ref "XM_030247239.2"; exon_number "2"; gene_id "218639"; transcript_name "TCONS_00018583"; gene_biotype "protein_coding"; class_code "i"; transcript_id "TCONS_00018583"; gene_name "Arl15"; transcript_biotype "sense_intronic"
NC_000079.7	Novogene	exon	5590288	5592036	.	-	.	nearest_ref "XR_873112.3"; exon_number "1"; gene_id "102638869"; transcript_name "TCONS_00018609"; gene_biotype "lncRNA"; class_code "j"; transcript_id "TCONS_00018609"; gene_name "Gm35330"; transcript_biotype "lincRNA"
NC_000079.7	Novogene	exon	5621106	5621238	.	-	.	nearest_ref "XR_873112.3"; exon_number "2"; gene_id "102638869"; transcript_name "TCONS_00018609"; gene_biotype "lncRNA"; class_code "j"; transcript_id "TCONS_00018609"; gene_name "Gm35330"; transcript_biotype "lincRNA"
NC_000079.7	Novogene	exon	5774398	5774440	.	-	.	nearest_ref "XR_873112.3"; exon_number "3"; gene_id "102638869"; transcript_name "TCONS_00018609"; gene_biotype "lncRNA"; class_code "j"; transcript_id "TCONS_00018609"; gene_name "Gm35330"; transcript_biotype "lincRNA"
NC_000079.7	Novogene	exon	5650892	5662070	.	-	.	exon_number "1"; gene_id "XLOC_011145"; transcript_name "TCONS_00018611"; gene_biotype "novel"; class_code "u"; transcript_id "TCONS_00018611"; gene_name "XLOC_011145"; transcript_biotype "lincRNA"
NC_000079.7	Novogene	exon	5688844	5693566	.	-	.	exon_number "2"; gene_id "XLOC_011145"; transcript_name "TCONS_00018611"; gene_biotype "novel"; class_code "u"; transcript_id "TCONS_00018611"; gene_name "XLOC_011145"; transcript_biotype "lincRNA"
NC_000079.7	Novogene	exon	30414345	30415335	.	-	.	nearest_ref "XR_004938095.1"; exon_number "1"; gene_id "105245401"; transcript_name "TCONS_00018727"; gene_biotype "lncRNA"; class_code "j"; transcript_id "TCONS_00018727"; gene_name "Gm40863"; transcript_biotype "lincRNA"
NC_000079.7	Novogene	exon	30415487	30415722	.	-	.	nearest_ref "XR_004938095.1"; exon_number "2"; gene_id "105245401"; transcript_name "TCONS_00018727"; gene_biotype "lncRNA"; class_code "j"; transcript_id "TCONS_00018727"; gene_name "Gm40863"; transcript_biotype "lincRNA"
NC_000079.7	Novogene	exon	30418472	30418734	.	-	.	nearest_ref "XR_004938095.1"; exon_number "3"; gene_id "105245401"; transcript_name "TCONS_00018727"; gene_biotype "lncRNA"; class_code "j"; transcript_id "TCONS_00018727"; gene_name "Gm40863"; transcript_biotype "lincRNA"
NC_000079.7	Novogene	exon	30419108	30419189	.	-	.	nearest_ref "XR_004938095.1"; exon_number "4"; gene_id "105245401"; transcript_name "TCONS_00018727"; gene_biotype "lncRNA"; class_code "j"; transcript_id "TCONS_00018727"; gene_name "Gm40863"; transcript_biotype "lincRNA"
NC_000079.7	Novogene	exon	54064092	54065178	.	-	.	nearest_ref "NR_152124.1"; exon_number "1"; gene_id "78550"; transcript_name "TCONS_00018833"; gene_biotype "lncRNA"; class_code "j"; transcript_id "TCONS_00018833"; gene_name "E130119H09Rik"; transcript_biotype "lincRNA"
NC_000079.7	Novogene	exon	54067465	54067708	.	-	.	nearest_ref "NR_152124.1"; exon_number "2"; gene_id "78550"; transcript_name "TCONS_00018833"; gene_biotype "lncRNA"; class_code "j"; transcript_id "TCONS_00018833"; gene_name "E130119H09Rik"; transcript_biotype "lincRNA"
NC_000079.7	Novogene	exon	54069508	54069760	.	-	.	nearest_ref "NR_152124.1"; exon_number "3"; gene_id "78550"; transcript_name "TCONS_00018833"; gene_biotype "lncRNA"; class_code "j"; transcript_id "TCONS_00018833"; gene_name "E130119H09Rik"; transcript_biotype "lincRNA"
NC_000079.7	Novogene	exon	58273693	58275288	.	-	.	nearest_ref "NM_029872.1"; exon_number "1"; gene_id "77134"; transcript_name "TCONS_00018869"; gene_biotype "protein_coding"; class_code "o"; transcript_id "TCONS_00018869"; gene_name "Hnrnpa0"; transcript_biotype "sense_overlapping"
NC_000079.7	Novogene	exon	58276164	58276370	.	-	.	nearest_ref "NM_029872.1"; exon_number "2"; gene_id "77134"; transcript_name "TCONS_00018869"; gene_biotype "protein_coding"; class_code "o"; transcript_id "TCONS_00018869"; gene_name "Hnrnpa0"; transcript_biotype "sense_overlapping"
NC_000079.7	Novogene	exon	58381161	58381472	.	-	.	nearest_ref "XM_011244543.4"; exon_number "1"; gene_id "56278"; transcript_name "TCONS_00018874"; gene_biotype "protein_coding"; class_code "j"; transcript_id "TCONS_00018874"; gene_name "Gkap1"; transcript_biotype "others"
NC_000079.7	Novogene	exon	58382530	58382883	.	-	.	nearest_ref "XM_011244543.4"; exon_number "2"; gene_id "56278"; transcript_name "TCONS_00018874"; gene_biotype "protein_coding"; class_code "j"; transcript_id "TCONS_00018874"; gene_name "Gkap1"; transcript_biotype "others"
NC_000079.7	Novogene	exon	64294254	64295377	.	-	.	nearest_ref "NM_001361047.1"; exon_number "1"; gene_id "238673"; transcript_name "TCONS_00018915"; gene_biotype "protein_coding"; class_code "j"; transcript_id "TCONS_00018915"; gene_name "Zfp367"; transcript_biotype "others"
NC_000079.7	Novogene	exon	64297884	64297922	.	-	.	nearest_ref "NM_001361047.1"; exon_number "2"; gene_id "238673"; transcript_name "TCONS_00018915"; gene_biotype "protein_coding"; class_code "j"; transcript_id "TCONS_00018915"; gene_name "Zfp367"; transcript_biotype "others"
NC_000079.7	Novogene	exon	64300203	64300249	.	-	.	nearest_ref "NM_001361047.1"; exon_number "3"; gene_id "238673"; transcript_name "TCONS_00018915"; gene_biotype "protein_coding"; class_code "j"; transcript_id "TCONS_00018915"; gene_name "Zfp367"; transcript_biotype "others"
NC_000079.7	Novogene	exon	73411059	73411218	.	-	.	nearest_ref "NM_018885.2"; exon_number "1"; gene_id "50916"; transcript_name "TCONS_00018948"; gene_biotype "protein_coding"; class_code "i"; transcript_id "TCONS_00018948"; gene_name "Irx4"; transcript_biotype "sense_intronic"
NC_000079.7	Novogene	exon	73412054	73412786	.	-	.	nearest_ref "NM_018885.2"; exon_number "2"; gene_id "50916"; transcript_name "TCONS_00018948"; gene_biotype "protein_coding"; class_code "i"; transcript_id "TCONS_00018948"; gene_name "Irx4"; transcript_biotype "sense_intronic"
NC_000079.7	Novogene	exon	74605041	74607207	.	-	.	nearest_ref "XR_004938198.1"; exon_number "1"; gene_id "622175"; transcript_name "TCONS_00018965"; gene_biotype "lncRNA"; class_code "o"; transcript_id "TCONS_00018965"; gene_name "E430024I08Rik"; transcript_biotype "sense_overlapping"
NC_000079.7	Novogene	exon	74666728	74667692	.	-	.	nearest_ref "XR_004938198.1"; exon_number "2"; gene_id "622175"; transcript_name "TCONS_00018965"; gene_biotype "lncRNA"; class_code "o"; transcript_id "TCONS_00018965"; gene_name "E430024I08Rik"; transcript_biotype "sense_overlapping"
NC_000080.7	Novogene	exon	21569058	21571704	.	+	.	nearest_ref "XM_006519269.5"; exon_number "1"; gene_id "54169"; transcript_name "TCONS_00019175"; gene_biotype "protein_coding"; class_code "o"; transcript_id "TCONS_00019175"; gene_name "Kat6b"; transcript_biotype "sense_overlapping"
NC_000080.7	Novogene	exon	21642830	21643774	.	+	.	nearest_ref "XM_006519269.5"; exon_number "2"; gene_id "54169"; transcript_name "TCONS_00019175"; gene_biotype "protein_coding"; class_code "o"; transcript_id "TCONS_00019175"; gene_name "Kat6b"; transcript_biotype "sense_overlapping"
NC_000080.7	Novogene	exon	31837268	31837336	.	+	.	exon_number "1"; gene_id "XLOC_011523"; transcript_name "TCONS_00019255"; gene_biotype "novel"; class_code "u"; transcript_id "TCONS_00019255"; gene_name "XLOC_011523"; transcript_biotype "lincRNA"
NC_000080.7	Novogene	exon	31842002	31842406	.	+	.	exon_number "2"; gene_id "XLOC_011523"; transcript_name "TCONS_00019255"; gene_biotype "novel"; class_code "u"; transcript_id "TCONS_00019255"; gene_name "XLOC_011523"; transcript_biotype "lincRNA"
NC_000080.7	Novogene	exon	31837290	31837626	.	+	.	exon_number "1"; gene_id "XLOC_011523"; transcript_name "TCONS_00019257"; gene_biotype "novel"; class_code "u"; transcript_id "TCONS_00019257"; gene_name "XLOC_011523"; transcript_biotype "lincRNA"
NC_000080.7	Novogene	exon	31842292	31842627	.	+	.	exon_number "2"; gene_id "XLOC_011523"; transcript_name "TCONS_00019257"; gene_biotype "novel"; class_code "u"; transcript_id "TCONS_00019257"; gene_name "XLOC_011523"; transcript_biotype "lincRNA"
NC_000080.7	Novogene	exon	31837290	31837454	.	+	.	exon_number "1"; gene_id "XLOC_011523"; transcript_name "TCONS_00019256"; gene_biotype "novel"; class_code "u"; transcript_id "TCONS_00019256"; gene_name "XLOC_011523"; transcript_biotype "lincRNA"
NC_000080.7	Novogene	exon	31842120	31842627	.	+	.	exon_number "2"; gene_id "XLOC_011523"; transcript_name "TCONS_00019256"; gene_biotype "novel"; class_code "u"; transcript_id "TCONS_00019256"; gene_name "XLOC_011523"; transcript_biotype "lincRNA"
NC_000080.7	Novogene	exon	34383937	34384021	.	+	.	exon_number "1"; gene_id "XLOC_011536"; transcript_name "TCONS_00019277"; gene_biotype "novel"; class_code "u"; transcript_id "TCONS_00019277"; gene_name "XLOC_011536"; transcript_biotype "lincRNA"
NC_000080.7	Novogene	exon	34384215	34384590	.	+	.	exon_number "2"; gene_id "XLOC_011536"; transcript_name "TCONS_00019277"; gene_biotype "novel"; class_code "u"; transcript_id "TCONS_00019277"; gene_name "XLOC_011536"; transcript_biotype "lincRNA"
NC_000080.7	Novogene	exon	34383957	34384021	.	+	.	exon_number "1"; gene_id "XLOC_011536"; transcript_name "TCONS_00019278"; gene_biotype "novel"; class_code "u"; transcript_id "TCONS_00019278"; gene_name "XLOC_011536"; transcript_biotype "lincRNA"
NC_000080.7	Novogene	exon	34384220	34384590	.	+	.	exon_number "2"; gene_id "XLOC_011536"; transcript_name "TCONS_00019278"; gene_biotype "novel"; class_code "u"; transcript_id "TCONS_00019278"; gene_name "XLOC_011536"; transcript_biotype "lincRNA"
NC_000080.7	Novogene	exon	45789214	45789704	.	-	.	nearest_ref "NR_045809.1"; exon_number "1"; gene_id "67651"; transcript_name "TCONS_00019791"; gene_biotype "lncRNA"; class_code "i"; transcript_id "TCONS_00019791"; gene_name "4930527F14Rik"; transcript_biotype "sense_intronic"
NC_000080.7	Novogene	exon	45791235	45791407	.	-	.	nearest_ref "NR_045809.1"; exon_number "2"; gene_id "67651"; transcript_name "TCONS_00019791"; gene_biotype "lncRNA"; class_code "i"; transcript_id "TCONS_00019791"; gene_name "4930527F14Rik"; transcript_biotype "sense_intronic"
NC_000080.7	Novogene	exon	61840285	61841255	.	-	.	nearest_ref "NR_028264.1"; exon_number "1"; gene_id "668253"; transcript_name "TCONS_00019963"; gene_biotype "lncRNA"; class_code "j"; transcript_id "TCONS_00019963"; gene_name "Dleu2"; transcript_biotype "lincRNA"
NC_000080.7	Novogene	exon	61851615	61851720	.	-	.	nearest_ref "NR_028264.1"; exon_number "2"; gene_id "668253"; transcript_name "TCONS_00019963"; gene_biotype "lncRNA"; class_code "j"; transcript_id "TCONS_00019963"; gene_name "Dleu2"; transcript_biotype "lincRNA"
NC_000080.7	Novogene	exon	61869886	61873040	.	-	.	nearest_ref "NR_028264.1"; exon_number "3"; gene_id "668253"; transcript_name "TCONS_00019963"; gene_biotype "lncRNA"; class_code "j"; transcript_id "TCONS_00019963"; gene_name "Dleu2"; transcript_biotype "lincRNA"
NC_000080.7	Novogene	exon	61880809	61880904	.	-	.	nearest_ref "NR_028264.1"; exon_number "4"; gene_id "668253"; transcript_name "TCONS_00019963"; gene_biotype "lncRNA"; class_code "j"; transcript_id "TCONS_00019963"; gene_name "Dleu2"; transcript_biotype "lincRNA"
NC_000080.7	Novogene	exon	61919559	61919822	.	-	.	nearest_ref "NR_028264.1"; exon_number "5"; gene_id "668253"; transcript_name "TCONS_00019963"; gene_biotype "lncRNA"; class_code "j"; transcript_id "TCONS_00019963"; gene_name "Dleu2"; transcript_biotype "lincRNA"
NC_000080.7	Novogene	exon	61888661	61903934	.	-	.	nearest_ref "NR_028264.1"; exon_number "1"; gene_id "668253"; transcript_name "TCONS_00019967"; gene_biotype "lncRNA"; class_code "j"; transcript_id "TCONS_00019967"; gene_name "Dleu2"; transcript_biotype "lincRNA"
NC_000080.7	Novogene	exon	61914353	61914412	.	-	.	nearest_ref "NR_028264.1"; exon_number "2"; gene_id "668253"; transcript_name "TCONS_00019967"; gene_biotype "lncRNA"; class_code "j"; transcript_id "TCONS_00019967"; gene_name "Dleu2"; transcript_biotype "lincRNA"
NC_000080.7	Novogene	exon	61914961	61915120	.	-	.	nearest_ref "NR_028264.1"; exon_number "3"; gene_id "668253"; transcript_name "TCONS_00019967"; gene_biotype "lncRNA"; class_code "j"; transcript_id "TCONS_00019967"; gene_name "Dleu2"; transcript_biotype "lincRNA"
NC_000080.7	Novogene	exon	61919559	61919822	.	-	.	nearest_ref "NR_028264.1"; exon_number "4"; gene_id "668253"; transcript_name "TCONS_00019967"; gene_biotype "lncRNA"; class_code "j"; transcript_id "TCONS_00019967"; gene_name "Dleu2"; transcript_biotype "lincRNA"
NC_000080.7	Novogene	exon	79380470	79382963	.	-	.	nearest_ref "NM_027906.1"; exon_number "1"; gene_id "219189"; transcript_name "TCONS_00020050"; gene_biotype "protein_coding"; class_code "i"; transcript_id "TCONS_00020050"; gene_name "Vwa8"; transcript_biotype "sense_intronic"
NC_000080.7	Novogene	exon	79388914	79389540	.	-	.	nearest_ref "NM_027906.1"; exon_number "2"; gene_id "219189"; transcript_name "TCONS_00020050"; gene_biotype "protein_coding"; class_code "i"; transcript_id "TCONS_00020050"; gene_name "Vwa8"; transcript_biotype "sense_intronic"
NC_000080.7	Novogene	exon	79381542	79383000	.	-	.	nearest_ref "NM_027906.1"; exon_number "1"; gene_id "219189"; transcript_name "TCONS_00020051"; gene_biotype "protein_coding"; class_code "i"; transcript_id "TCONS_00020051"; gene_name "Vwa8"; transcript_biotype "sense_intronic"
NC_000080.7	Novogene	exon	79388951	79389357	.	-	.	nearest_ref "NM_027906.1"; exon_number "2"; gene_id "219189"; transcript_name "TCONS_00020051"; gene_biotype "protein_coding"; class_code "i"; transcript_id "TCONS_00020051"; gene_name "Vwa8"; transcript_biotype "sense_intronic"
NC_000080.7	Novogene	exon	100426137	100429090	.	-	.	nearest_ref "100462963.1"; exon_number "1"; gene_id "100462963"; transcript_name "TCONS_00020064"; gene_biotype "pseudogene"; class_code "x"; transcript_id "TCONS_00020064"; gene_name "Gm16260"; transcript_biotype "antisense"
NC_000080.7	Novogene	exon	100497617	100503456	.	-	.	nearest_ref "100462963.1"; exon_number "2"; gene_id "100462963"; transcript_name "TCONS_00020064"; gene_biotype "pseudogene"; class_code "x"; transcript_id "TCONS_00020064"; gene_name "Gm16260"; transcript_biotype "antisense"
NC_000080.7	Novogene	exon	100492768	100497564	.	-	.	nearest_ref "XM_036158487.1"; exon_number "1"; gene_id "16597"; transcript_name "TCONS_00020065"; gene_biotype "protein_coding"; class_code "i"; transcript_id "TCONS_00020065"; gene_name "Klf12"; transcript_biotype "sense_intronic"
NC_000080.7	Novogene	exon	100497625	100521473	.	-	.	nearest_ref "XM_036158487.1"; exon_number "2"; gene_id "16597"; transcript_name "TCONS_00020065"; gene_biotype "protein_coding"; class_code "i"; transcript_id "TCONS_00020065"; gene_name "Klf12"; transcript_biotype "sense_intronic"
NC_000080.7	Novogene	exon	100492823	100497570	.	-	.	nearest_ref "XM_036158487.1"; exon_number "1"; gene_id "16597"; transcript_name "TCONS_00020066"; gene_biotype "protein_coding"; class_code "i"; transcript_id "TCONS_00020066"; gene_name "Klf12"; transcript_biotype "sense_intronic"
NC_000080.7	Novogene	exon	100497637	100503442	.	-	.	nearest_ref "XM_036158487.1"; exon_number "2"; gene_id "16597"; transcript_name "TCONS_00020066"; gene_biotype "protein_coding"; class_code "i"; transcript_id "TCONS_00020066"; gene_name "Klf12"; transcript_biotype "sense_intronic"
NC_000080.7	Novogene	exon	103214035	103217225	.	-	.	nearest_ref "NM_177715.4"; exon_number "1"; gene_id "239217"; transcript_name "TCONS_00020079"; gene_biotype "protein_coding"; class_code "o"; transcript_id "TCONS_00020079"; gene_name "Kctd12"; transcript_biotype "sense_overlapping"
NC_000080.7	Novogene	exon	103217263	103217933	.	-	.	nearest_ref "NM_177715.4"; exon_number "2"; gene_id "239217"; transcript_name "TCONS_00020079"; gene_biotype "protein_coding"; class_code "o"; transcript_id "TCONS_00020079"; gene_name "Kctd12"; transcript_biotype "sense_overlapping"
NC_000081.7	Novogene	exon	37000494	37001167	.	+	.	nearest_ref "XM_030248876.1"; exon_number "1"; gene_id "115488529"; transcript_name "TCONS_00020208"; gene_biotype "protein_coding"; class_code "o"; transcript_id "TCONS_00020208"; gene_name "LOC115488529"; transcript_biotype "sense_overlapping"
NC_000081.7	Novogene	exon	37002083	37002190	.	+	.	nearest_ref "XM_030248876.1"; exon_number "2"; gene_id "115488529"; transcript_name "TCONS_00020208"; gene_biotype "protein_coding"; class_code "o"; transcript_id "TCONS_00020208"; gene_name "LOC115488529"; transcript_biotype "sense_overlapping"
NC_000081.7	Novogene	exon	37003930	37004066	.	+	.	nearest_ref "XM_030248876.1"; exon_number "3"; gene_id "115488529"; transcript_name "TCONS_00020208"; gene_biotype "protein_coding"; class_code "o"; transcript_id "TCONS_00020208"; gene_name "LOC115488529"; transcript_biotype "sense_overlapping"
NC_000081.7	Novogene	exon	37007372	37008845	.	+	.	nearest_ref "XM_030248876.1"; exon_number "4"; gene_id "115488529"; transcript_name "TCONS_00020208"; gene_biotype "protein_coding"; class_code "o"; transcript_id "TCONS_00020208"; gene_name "LOC115488529"; transcript_biotype "sense_overlapping"
NC_000081.7	Novogene	exon	85530169	85530496	.	+	.	exon_number "1"; gene_id "XLOC_012201"; transcript_name "TCONS_00020455"; gene_biotype "novel"; class_code "u"; transcript_id "TCONS_00020455"; gene_name "XLOC_012201"; transcript_biotype "lincRNA"
NC_000081.7	Novogene	exon	85532396	85536341	.	+	.	exon_number "2"; gene_id "XLOC_012201"; transcript_name "TCONS_00020455"; gene_biotype "novel"; class_code "u"; transcript_id "TCONS_00020455"; gene_name "XLOC_012201"; transcript_biotype "lincRNA"
NC_000081.7	Novogene	exon	85537776	85539741	.	+	.	exon_number "1"; gene_id "XLOC_012201"; transcript_name "TCONS_00020456"; gene_biotype "novel"; class_code "u"; transcript_id "TCONS_00020456"; gene_name "XLOC_012201"; transcript_biotype "lincRNA"
NC_000081.7	Novogene	exon	85539853	85543597	.	+	.	exon_number "2"; gene_id "XLOC_012201"; transcript_name "TCONS_00020456"; gene_biotype "novel"; class_code "u"; transcript_id "TCONS_00020456"; gene_name "XLOC_012201"; transcript_biotype "lincRNA"
NC_000081.7	Novogene	exon	85552513	85556322	.	+	.	nearest_ref "NR_110483.1"; exon_number "1"; gene_id "102800312"; transcript_name "TCONS_00020457"; gene_biotype "lncRNA"; class_code "j"; transcript_id "TCONS_00020457"; gene_name "Lncppara"; transcript_biotype "lincRNA"
NC_000081.7	Novogene	exon	85567437	85588491	.	+	.	nearest_ref "NR_110483.1"; exon_number "2"; gene_id "102800312"; transcript_name "TCONS_00020457"; gene_biotype "lncRNA"; class_code "j"; transcript_id "TCONS_00020457"; gene_name "Lncppara"; transcript_biotype "lincRNA"
NC_000081.7	Novogene	exon	85590755	85591725	.	+	.	nearest_ref "NR_110483.1"; exon_number "3"; gene_id "102800312"; transcript_name "TCONS_00020457"; gene_biotype "lncRNA"; class_code "j"; transcript_id "TCONS_00020457"; gene_name "Lncppara"; transcript_biotype "lincRNA"
NC_000081.7	Novogene	exon	85552523	85556322	.	+	.	nearest_ref "NR_110483.1"; exon_number "1"; gene_id "102800312"; transcript_name "TCONS_00020458"; gene_biotype "lncRNA"; class_code "o"; transcript_id "TCONS_00020458"; gene_name "Lncppara"; transcript_biotype "sense_overlapping"
NC_000081.7	Novogene	exon	85567437	85567515	.	+	.	nearest_ref "NR_110483.1"; exon_number "2"; gene_id "102800312"; transcript_name "TCONS_00020458"; gene_biotype "lncRNA"; class_code "o"; transcript_id "TCONS_00020458"; gene_name "Lncppara"; transcript_biotype "sense_overlapping"
NC_000081.7	Novogene	exon	85577738	85577819	.	+	.	nearest_ref "NR_110483.1"; exon_number "3"; gene_id "102800312"; transcript_name "TCONS_00020458"; gene_biotype "lncRNA"; class_code "o"; transcript_id "TCONS_00020458"; gene_name "Lncppara"; transcript_biotype "sense_overlapping"
NC_000081.7	Novogene	exon	85579116	85579181	.	+	.	nearest_ref "NR_110483.1"; exon_number "4"; gene_id "102800312"; transcript_name "TCONS_00020458"; gene_biotype "lncRNA"; class_code "o"; transcript_id "TCONS_00020458"; gene_name "Lncppara"; transcript_biotype "sense_overlapping"
NC_000081.7	Novogene	exon	85585108	85585221	.	+	.	nearest_ref "NR_110483.1"; exon_number "5"; gene_id "102800312"; transcript_name "TCONS_00020458"; gene_biotype "lncRNA"; class_code "o"; transcript_id "TCONS_00020458"; gene_name "Lncppara"; transcript_biotype "sense_overlapping"
NC_000081.7	Novogene	exon	85586895	85590695	.	+	.	nearest_ref "NR_110483.1"; exon_number "6"; gene_id "102800312"; transcript_name "TCONS_00020458"; gene_biotype "lncRNA"; class_code "o"; transcript_id "TCONS_00020458"; gene_name "Lncppara"; transcript_biotype "sense_overlapping"
NC_000081.7	Novogene	exon	103044188	103044382	.	+	.	nearest_ref "NR_045743.1"; exon_number "1"; gene_id "432989"; transcript_name "TCONS_00020611"; gene_biotype "lncRNA"; class_code "i"; transcript_id "TCONS_00020611"; gene_name "D930007P13Rik"; transcript_biotype "sense_intronic"
NC_000081.7	Novogene	exon	103048331	103049099	.	+	.	nearest_ref "NR_045743.1"; exon_number "2"; gene_id "432989"; transcript_name "TCONS_00020611"; gene_biotype "lncRNA"; class_code "i"; transcript_id "TCONS_00020611"; gene_name "D930007P13Rik"; transcript_biotype "sense_intronic"
NC_000081.7	Novogene	exon	68171547	68178484	.	-	.	nearest_ref "XR_004938977.1"; exon_number "1"; gene_id "118568201"; transcript_name "TCONS_00020768"; gene_biotype "lncRNA"; class_code "j"; transcript_id "TCONS_00020768"; gene_name "LOC118568201"; transcript_biotype "lincRNA"
NC_000081.7	Novogene	exon	68226792	68234628	.	-	.	nearest_ref "XR_004938977.1"; exon_number "2"; gene_id "118568201"; transcript_name "TCONS_00020768"; gene_biotype "lncRNA"; class_code "j"; transcript_id "TCONS_00020768"; gene_name "LOC118568201"; transcript_biotype "lincRNA"
NC_000081.7	Novogene	exon	103044240	103044382	.	-	.	nearest_ref "NR_045743.1"; exon_number "1"; gene_id "432989"; transcript_name "TCONS_00021125"; gene_biotype "lncRNA"; class_code "i"; transcript_id "TCONS_00021125"; gene_name "D930007P13Rik"; transcript_biotype "sense_intronic"
NC_000081.7	Novogene	exon	103048331	103048743	.	-	.	nearest_ref "NR_045743.1"; exon_number "2"; gene_id "432989"; transcript_name "TCONS_00021125"; gene_biotype "lncRNA"; class_code "i"; transcript_id "TCONS_00021125"; gene_name "D930007P13Rik"; transcript_biotype "sense_intronic"
NC_000082.7	Novogene	exon	23915185	23915204	.	+	.	exon_number "1"; gene_id "XLOC_012696"; transcript_name "TCONS_00021319"; gene_biotype "novel"; class_code "u"; transcript_id "TCONS_00021319"; gene_name "XLOC_012696"; transcript_biotype "lincRNA"
NC_000082.7	Novogene	exon	23916307	23920199	.	+	.	exon_number "2"; gene_id "XLOC_012696"; transcript_name "TCONS_00021319"; gene_biotype "novel"; class_code "u"; transcript_id "TCONS_00021319"; gene_name "XLOC_012696"; transcript_biotype "lincRNA"
NC_000082.7	Novogene	exon	33140657	33140686	.	+	.	nearest_ref "NM_001358570.1"; exon_number "1"; gene_id "22661"; transcript_name "TCONS_00021376"; gene_biotype "protein_coding"; class_code "o"; transcript_id "TCONS_00021376"; gene_name "Zfp148"; transcript_biotype "sense_overlapping"
NC_000082.7	Novogene	exon	33208361	33217480	.	+	.	nearest_ref "NM_001358570.1"; exon_number "2"; gene_id "22661"; transcript_name "TCONS_00021376"; gene_biotype "protein_coding"; class_code "o"; transcript_id "TCONS_00021376"; gene_name "Zfp148"; transcript_biotype "sense_overlapping"
NC_000082.7	Novogene	exon	33201215	33201397	.	+	.	nearest_ref "NM_011749.4"; exon_number "1"; gene_id "22661"; transcript_name "TCONS_00021378"; gene_biotype "protein_coding"; class_code "j"; transcript_id "TCONS_00021378"; gene_name "Zfp148"; transcript_biotype "others"
NC_000082.7	Novogene	exon	33210210	33217448	.	+	.	nearest_ref "NM_011749.4"; exon_number "2"; gene_id "22661"; transcript_name "TCONS_00021378"; gene_biotype "protein_coding"; class_code "j"; transcript_id "TCONS_00021378"; gene_name "Zfp148"; transcript_biotype "others"
NC_000082.7	Novogene	exon	42723472	42728084	.	+	.	nearest_ref "NM_001285805.1"; exon_number "1"; gene_id "56490"; transcript_name "TCONS_00021437"; gene_biotype "protein_coding"; class_code "j"; transcript_id "TCONS_00021437"; gene_name "Zbtb20"; transcript_biotype "others"
NC_000082.7	Novogene	exon	42845301	42845350	.	+	.	nearest_ref "NM_001285805.1"; exon_number "2"; gene_id "56490"; transcript_name "TCONS_00021437"; gene_biotype "protein_coding"; class_code "j"; transcript_id "TCONS_00021437"; gene_name "Zbtb20"; transcript_biotype "others"
NC_000082.7	Novogene	exon	42892787	42892832	.	+	.	nearest_ref "NM_001285805.1"; exon_number "3"; gene_id "56490"; transcript_name "TCONS_00021437"; gene_biotype "protein_coding"; class_code "j"; transcript_id "TCONS_00021437"; gene_name "Zbtb20"; transcript_biotype "others"
NC_000082.7	Novogene	exon	42944312	42957209	.	+	.	nearest_ref "NM_001285805.1"; exon_number "4"; gene_id "56490"; transcript_name "TCONS_00021437"; gene_biotype "protein_coding"; class_code "j"; transcript_id "TCONS_00021437"; gene_name "Zbtb20"; transcript_biotype "others"
NC_000082.7	Novogene	exon	77126216	77126566	.	+	.	nearest_ref "NR_015543.3"; exon_number "1"; gene_id "77994"; transcript_name "TCONS_00021501"; gene_biotype "lncRNA"; class_code "j"; transcript_id "TCONS_00021501"; gene_name "Mir99ahg"; transcript_biotype "lincRNA"
NC_000082.7	Novogene	exon	77157551	77157606	.	+	.	nearest_ref "NR_015543.3"; exon_number "2"; gene_id "77994"; transcript_name "TCONS_00021501"; gene_biotype "lncRNA"; class_code "j"; transcript_id "TCONS_00021501"; gene_name "Mir99ahg"; transcript_biotype "lincRNA"
NC_000082.7	Novogene	exon	77233243	77233290	.	+	.	nearest_ref "NR_015543.3"; exon_number "3"; gene_id "77994"; transcript_name "TCONS_00021501"; gene_biotype "lncRNA"; class_code "j"; transcript_id "TCONS_00021501"; gene_name "Mir99ahg"; transcript_biotype "lincRNA"
NC_000082.7	Novogene	exon	77298391	77298498	.	+	.	nearest_ref "NR_015543.3"; exon_number "4"; gene_id "77994"; transcript_name "TCONS_00021501"; gene_biotype "lncRNA"; class_code "j"; transcript_id "TCONS_00021501"; gene_name "Mir99ahg"; transcript_biotype "lincRNA"
NC_000082.7	Novogene	exon	77352810	77352855	.	+	.	nearest_ref "NR_015543.3"; exon_number "5"; gene_id "77994"; transcript_name "TCONS_00021501"; gene_biotype "lncRNA"; class_code "j"; transcript_id "TCONS_00021501"; gene_name "Mir99ahg"; transcript_biotype "lincRNA"
NC_000082.7	Novogene	exon	77393787	77393847	.	+	.	nearest_ref "NR_015543.3"; exon_number "6"; gene_id "77994"; transcript_name "TCONS_00021501"; gene_biotype "lncRNA"; class_code "j"; transcript_id "TCONS_00021501"; gene_name "Mir99ahg"; transcript_biotype "lincRNA"
NC_000082.7	Novogene	exon	77476865	77476911	.	+	.	nearest_ref "NR_015543.3"; exon_number "7"; gene_id "77994"; transcript_name "TCONS_00021501"; gene_biotype "lncRNA"; class_code "j"; transcript_id "TCONS_00021501"; gene_name "Mir99ahg"; transcript_biotype "lincRNA"
NC_000082.7	Novogene	exon	77488123	77494349	.	+	.	nearest_ref "NR_015543.3"; exon_number "8"; gene_id "77994"; transcript_name "TCONS_00021501"; gene_biotype "lncRNA"; class_code "j"; transcript_id "TCONS_00021501"; gene_name "Mir99ahg"; transcript_biotype "lincRNA"
NC_000082.7	Novogene	exon	24211306	24211857	.	-	.	nearest_ref "NR_037954.1"; exon_number "1"; gene_id "68841"; transcript_name "TCONS_00021739"; gene_biotype "lncRNA"; class_code "j"; transcript_id "TCONS_00021739"; gene_name "Lppos"; transcript_biotype "lincRNA"
NC_000082.7	Novogene	exon	24212109	24212405	.	-	.	nearest_ref "NR_037954.1"; exon_number "2"; gene_id "68841"; transcript_name "TCONS_00021739"; gene_biotype "lncRNA"; class_code "j"; transcript_id "TCONS_00021739"; gene_name "Lppos"; transcript_biotype "lincRNA"
NC_000082.7	Novogene	exon	45224436	45227674	.	-	.	nearest_ref "XR_004939171.1"; exon_number "1"; gene_id "17470"; transcript_name "TCONS_00021826"; gene_biotype "protein_coding"; class_code "j"; transcript_id "TCONS_00021826"; gene_name "Cd200"; transcript_biotype "others"
NC_000082.7	Novogene	exon	45229219	45229416	.	-	.	nearest_ref "XR_004939171.1"; exon_number "2"; gene_id "17470"; transcript_name "TCONS_00021826"; gene_biotype "protein_coding"; class_code "j"; transcript_id "TCONS_00021826"; gene_name "Cd200"; transcript_biotype "others"
NC_000082.7	Novogene	exon	57381657	57382125	.	-	.	nearest_ref "NM_025599.3"; exon_number "1"; gene_id "66497"; transcript_name "TCONS_00021860"; gene_biotype "protein_coding"; class_code "j"; transcript_id "TCONS_00021860"; gene_name "Cmss1"; transcript_biotype "others"
NC_000082.7	Novogene	exon	57427029	57427230	.	-	.	nearest_ref "NM_025599.3"; exon_number "2"; gene_id "66497"; transcript_name "TCONS_00021860"; gene_biotype "protein_coding"; class_code "j"; transcript_id "TCONS_00021860"; gene_name "Cmss1"; transcript_biotype "others"
NC_000082.7	Novogene	exon	84946446	84946831	.	-	.	nearest_ref "NM_001198823.1"; exon_number "1"; gene_id "11820"; transcript_name "TCONS_00021910"; gene_biotype "protein_coding"; class_code "i"; transcript_id "TCONS_00021910"; gene_name "App"; transcript_biotype "sense_intronic"
NC_000082.7	Novogene	exon	84946892	84949585	.	-	.	nearest_ref "NM_001198823.1"; exon_number "2"; gene_id "11820"; transcript_name "TCONS_00021910"; gene_biotype "protein_coding"; class_code "i"; transcript_id "TCONS_00021910"; gene_name "App"; transcript_biotype "sense_intronic"
NC_000082.7	Novogene	exon	90133767	90138521	.	-	.	exon_number "1"; gene_id "XLOC_013037"; transcript_name "TCONS_00021933"; gene_biotype "novel"; class_code "u"; transcript_id "TCONS_00021933"; gene_name "XLOC_013037"; transcript_biotype "lincRNA"
NC_000082.7	Novogene	exon	90146525	90146760	.	-	.	exon_number "2"; gene_id "XLOC_013037"; transcript_name "TCONS_00021933"; gene_biotype "novel"; class_code "u"; transcript_id "TCONS_00021933"; gene_name "XLOC_013037"; transcript_biotype "lincRNA"
NC_000083.7	Novogene	exon	3251477	3263776	.	+	.	exon_number "1"; gene_id "XLOC_013071"; transcript_name "TCONS_00021984"; gene_biotype "novel"; class_code "u"; transcript_id "TCONS_00021984"; gene_name "XLOC_013071"; transcript_biotype "lincRNA"
NC_000083.7	Novogene	exon	3288538	3290016	.	+	.	exon_number "2"; gene_id "XLOC_013071"; transcript_name "TCONS_00021984"; gene_biotype "novel"; class_code "u"; transcript_id "TCONS_00021984"; gene_name "XLOC_013071"; transcript_biotype "lincRNA"
NC_000083.7	Novogene	exon	27062419	27062492	.	+	.	nearest_ref "XM_006523797.4"; exon_number "1"; gene_id "18091"; transcript_name "TCONS_00022165"; gene_biotype "protein_coding"; class_code "x"; transcript_id "TCONS_00022165"; gene_name "Nkx2-5"; transcript_biotype "antisense"
NC_000083.7	Novogene	exon	27068637	27071859	.	+	.	nearest_ref "XM_006523797.4"; exon_number "2"; gene_id "18091"; transcript_name "TCONS_00022165"; gene_biotype "protein_coding"; class_code "x"; transcript_id "TCONS_00022165"; gene_name "Nkx2-5"; transcript_biotype "antisense"
NC_000083.7	Novogene	exon	28964967	28965145	.	+	.	nearest_ref "NM_001168514.1"; exon_number "1"; gene_id "26416"; transcript_name "TCONS_00022197"; gene_biotype "protein_coding"; class_code "j"; transcript_id "TCONS_00022197"; gene_name "Mapk14"; transcript_biotype "others"
NC_000083.7	Novogene	exon	28965245	28967367	.	+	.	nearest_ref "NM_001168514.1"; exon_number "2"; gene_id "26416"; transcript_name "TCONS_00022197"; gene_biotype "protein_coding"; class_code "j"; transcript_id "TCONS_00022197"; gene_name "Mapk14"; transcript_biotype "others"
NC_000083.7	Novogene	exon	30224475	30242588	.	+	.	nearest_ref "NM_001356265.1"; exon_number "1"; gene_id "21769"; transcript_name "TCONS_00022221"; gene_biotype "protein_coding"; class_code "i"; transcript_id "TCONS_00022221"; gene_name "Zfand3"; transcript_biotype "sense_intronic"
NC_000083.7	Novogene	exon	30243316	30276152	.	+	.	nearest_ref "NM_001356265.1"; exon_number "2"; gene_id "21769"; transcript_name "TCONS_00022221"; gene_biotype "protein_coding"; class_code "i"; transcript_id "TCONS_00022221"; gene_name "Zfand3"; transcript_biotype "sense_intronic"
NC_000083.7	Novogene	exon	40153886	40154178	.	+	.	nearest_ref "XM_036160881.1"; exon_number "1"; gene_id "118568312"; transcript_name "TCONS_00022366"; gene_biotype "protein_coding"; class_code "o"; transcript_id "TCONS_00022366"; gene_name "LOC118568312"; transcript_biotype "sense_overlapping"
NC_000083.7	Novogene	exon	40154331	40155767	.	+	.	nearest_ref "XM_036160881.1"; exon_number "2"; gene_id "118568312"; transcript_name "TCONS_00022366"; gene_biotype "protein_coding"; class_code "o"; transcript_id "TCONS_00022366"; gene_name "LOC118568312"; transcript_biotype "sense_overlapping"
NC_000083.7	Novogene	exon	40155811	40157250	.	+	.	nearest_ref "XM_036160881.1"; exon_number "3"; gene_id "118568312"; transcript_name "TCONS_00022366"; gene_biotype "protein_coding"; class_code "o"; transcript_id "TCONS_00022366"; gene_name "LOC118568312"; transcript_biotype "sense_overlapping"
NC_000083.7	Novogene	exon	40153886	40154334	.	+	.	nearest_ref "XM_036160881.1"; exon_number "1"; gene_id "118568312"; transcript_name "TCONS_00022365"; gene_biotype "protein_coding"; class_code "o"; transcript_id "TCONS_00022365"; gene_name "LOC118568312"; transcript_biotype "sense_overlapping"
NC_000083.7	Novogene	exon	40154497	40155705	.	+	.	nearest_ref "XM_036160881.1"; exon_number "2"; gene_id "118568312"; transcript_name "TCONS_00022365"; gene_biotype "protein_coding"; class_code "o"; transcript_id "TCONS_00022365"; gene_name "LOC118568312"; transcript_biotype "sense_overlapping"
NC_000083.7	Novogene	exon	40155941	40157250	.	+	.	nearest_ref "XM_036160881.1"; exon_number "3"; gene_id "118568312"; transcript_name "TCONS_00022365"; gene_biotype "protein_coding"; class_code "o"; transcript_id "TCONS_00022365"; gene_name "LOC118568312"; transcript_biotype "sense_overlapping"
NC_000083.7	Novogene	exon	40153886	40155767	.	+	.	nearest_ref "XM_036160881.1"; exon_number "1"; gene_id "118568312"; transcript_name "TCONS_00022367"; gene_biotype "protein_coding"; class_code "o"; transcript_id "TCONS_00022367"; gene_name "LOC118568312"; transcript_biotype "sense_overlapping"
NC_000083.7	Novogene	exon	40155811	40156950	.	+	.	nearest_ref "XM_036160881.1"; exon_number "2"; gene_id "118568312"; transcript_name "TCONS_00022367"; gene_biotype "protein_coding"; class_code "o"; transcript_id "TCONS_00022367"; gene_name "LOC118568312"; transcript_biotype "sense_overlapping"
NC_000083.7	Novogene	exon	40159160	40159724	.	+	.	nearest_ref "XM_036160881.1"; exon_number "3"; gene_id "118568312"; transcript_name "TCONS_00022367"; gene_biotype "protein_coding"; class_code "o"; transcript_id "TCONS_00022367"; gene_name "LOC118568312"; transcript_biotype "sense_overlapping"
NC_000083.7	Novogene	exon	40153886	40155173	.	+	.	nearest_ref "XM_036160881.1"; exon_number "1"; gene_id "118568312"; transcript_name "TCONS_00022368"; gene_biotype "protein_coding"; class_code "o"; transcript_id "TCONS_00022368"; gene_name "LOC118568312"; transcript_biotype "sense_overlapping"
NC_000083.7	Novogene	exon	40159186	40159725	.	+	.	nearest_ref "XM_036160881.1"; exon_number "2"; gene_id "118568312"; transcript_name "TCONS_00022368"; gene_biotype "protein_coding"; class_code "o"; transcript_id "TCONS_00022368"; gene_name "LOC118568312"; transcript_biotype "sense_overlapping"
NC_000083.7	Novogene	exon	40153887	40155767	.	+	.	nearest_ref "XM_036160881.1"; exon_number "1"; gene_id "118568312"; transcript_name "TCONS_00022369"; gene_biotype "protein_coding"; class_code "o"; transcript_id "TCONS_00022369"; gene_name "LOC118568312"; transcript_biotype "sense_overlapping"
NC_000083.7	Novogene	exon	40155811	40156106	.	+	.	nearest_ref "XM_036160881.1"; exon_number "2"; gene_id "118568312"; transcript_name "TCONS_00022369"; gene_biotype "protein_coding"; class_code "o"; transcript_id "TCONS_00022369"; gene_name "LOC118568312"; transcript_biotype "sense_overlapping"
NC_000083.7	Novogene	exon	40156180	40157263	.	+	.	nearest_ref "XM_036160881.1"; exon_number "3"; gene_id "118568312"; transcript_name "TCONS_00022369"; gene_biotype "protein_coding"; class_code "o"; transcript_id "TCONS_00022369"; gene_name "LOC118568312"; transcript_biotype "sense_overlapping"
NC_000083.7	Novogene	exon	75742900	75743163	.	+	.	nearest_ref "XM_006524271.4"; exon_number "1"; gene_id "240168"; transcript_name "TCONS_00022564"; gene_biotype "protein_coding"; class_code "j"; transcript_id "TCONS_00022564"; gene_name "Rasgrp3"; transcript_biotype "others"
NC_000083.7	Novogene	exon	75759166	75760608	.	+	.	nearest_ref "XM_006524271.4"; exon_number "2"; gene_id "240168"; transcript_name "TCONS_00022564"; gene_biotype "protein_coding"; class_code "j"; transcript_id "TCONS_00022564"; gene_name "Rasgrp3"; transcript_biotype "others"
NC_000083.7	Novogene	exon	3131525	3132987	.	-	.	nearest_ref "NR_003519.3"; exon_number "1"; gene_id "328734"; transcript_name "TCONS_00022625"; gene_biotype "transcribed_pseudogene"; class_code "j"; transcript_id "TCONS_00022625"; gene_name "Pisd-ps2"; transcript_biotype "lincRNA"
NC_000083.7	Novogene	exon	3134243	3134366	.	-	.	nearest_ref "NR_003519.3"; exon_number "2"; gene_id "328734"; transcript_name "TCONS_00022625"; gene_biotype "transcribed_pseudogene"; class_code "j"; transcript_id "TCONS_00022625"; gene_name "Pisd-ps2"; transcript_biotype "lincRNA"
NC_000083.7	Novogene	exon	3162162	3162847	.	-	.	nearest_ref "XR_003952285.2"; exon_number "1"; gene_id "624086"; transcript_name "TCONS_00022626"; gene_biotype "lncRNA"; class_code "j"; transcript_id "TCONS_00022626"; gene_name "A230045G11Rik"; transcript_biotype "lincRNA"
NC_000083.7	Novogene	exon	3163563	3163622	.	-	.	nearest_ref "XR_003952285.2"; exon_number "2"; gene_id "624086"; transcript_name "TCONS_00022626"; gene_biotype "lncRNA"; class_code "j"; transcript_id "TCONS_00022626"; gene_name "A230045G11Rik"; transcript_biotype "lincRNA"
NC_000083.7	Novogene	exon	3164463	3164731	.	-	.	nearest_ref "XR_003952285.2"; exon_number "3"; gene_id "624086"; transcript_name "TCONS_00022626"; gene_biotype "lncRNA"; class_code "j"; transcript_id "TCONS_00022626"; gene_name "A230045G11Rik"; transcript_biotype "lincRNA"
NC_000083.7	Novogene	exon	6373769	6373945	.	-	.	nearest_ref "NR_163600.2"; exon_number "1"; gene_id "101055731"; transcript_name "TCONS_00022632"; gene_biotype "transcribed_pseudogene"; class_code "o"; transcript_id "TCONS_00022632"; gene_name "Gm29719"; transcript_biotype "sense_overlapping"
NC_000083.7	Novogene	exon	6759831	6759989	.	-	.	nearest_ref "NR_163600.2"; exon_number "2"; gene_id "101055731"; transcript_name "TCONS_00022632"; gene_biotype "transcribed_pseudogene"; class_code "o"; transcript_id "TCONS_00022632"; gene_name "Gm29719"; transcript_biotype "sense_overlapping"
NC_000083.7	Novogene	exon	13810052	13810095	.	-	.	exon_number "1"; gene_id "XLOC_013488"; transcript_name "TCONS_00022672"; gene_biotype "novel"; class_code "u"; transcript_id "TCONS_00022672"; gene_name "XLOC_013488"; transcript_biotype "lincRNA"
NC_000083.7	Novogene	exon	13810163	13810314	.	-	.	exon_number "2"; gene_id "XLOC_013488"; transcript_name "TCONS_00022672"; gene_biotype "novel"; class_code "u"; transcript_id "TCONS_00022672"; gene_name "XLOC_013488"; transcript_biotype "lincRNA"
NC_000083.7	Novogene	exon	13810796	13810899	.	-	.	exon_number "3"; gene_id "XLOC_013488"; transcript_name "TCONS_00022672"; gene_biotype "novel"; class_code "u"; transcript_id "TCONS_00022672"; gene_name "XLOC_013488"; transcript_biotype "lincRNA"
NC_000083.7	Novogene	exon	13875233	13875344	.	-	.	exon_number "4"; gene_id "XLOC_013488"; transcript_name "TCONS_00022672"; gene_biotype "novel"; class_code "u"; transcript_id "TCONS_00022672"; gene_name "XLOC_013488"; transcript_biotype "lincRNA"
NC_000083.7	Novogene	exon	13875391	13875560	.	-	.	exon_number "5"; gene_id "XLOC_013488"; transcript_name "TCONS_00022672"; gene_biotype "novel"; class_code "u"; transcript_id "TCONS_00022672"; gene_name "XLOC_013488"; transcript_biotype "lincRNA"
NC_000083.7	Novogene	exon	27453994	27456111	.	-	.	nearest_ref "NR_131118.1"; exon_number "1"; gene_id "319720"; transcript_name "TCONS_00022791"; gene_biotype "lncRNA"; class_code "j"; transcript_id "TCONS_00022791"; gene_name "9630028I04Rik"; transcript_biotype "lincRNA"
NC_000083.7	Novogene	exon	27461548	27461665	.	-	.	nearest_ref "NR_131118.1"; exon_number "2"; gene_id "319720"; transcript_name "TCONS_00022791"; gene_biotype "lncRNA"; class_code "j"; transcript_id "TCONS_00022791"; gene_name "9630028I04Rik"; transcript_biotype "lincRNA"
NC_000083.7	Novogene	exon	27454046	27456111	.	-	.	nearest_ref "NR_131118.1"; exon_number "1"; gene_id "319720"; transcript_name "TCONS_00022792"; gene_biotype "lncRNA"; class_code "j"; transcript_id "TCONS_00022792"; gene_name "9630028I04Rik"; transcript_biotype "lincRNA"
NC_000083.7	Novogene	exon	27458359	27458522	.	-	.	nearest_ref "NR_131118.1"; exon_number "2"; gene_id "319720"; transcript_name "TCONS_00022792"; gene_biotype "lncRNA"; class_code "j"; transcript_id "TCONS_00022792"; gene_name "9630028I04Rik"; transcript_biotype "lincRNA"
NC_000083.7	Novogene	exon	27461293	27461665	.	-	.	nearest_ref "NR_131118.1"; exon_number "3"; gene_id "319720"; transcript_name "TCONS_00022792"; gene_biotype "lncRNA"; class_code "j"; transcript_id "TCONS_00022792"; gene_name "9630028I04Rik"; transcript_biotype "lincRNA"
NC_000083.7	Novogene	exon	40153888	40155767	.	-	.	nearest_ref "XM_036160881.1"; exon_number "1"; gene_id "118568312"; transcript_name "TCONS_00022949"; gene_biotype "protein_coding"; class_code "x"; transcript_id "TCONS_00022949"; gene_name "LOC118568312"; transcript_biotype "antisense"
NC_000083.7	Novogene	exon	40155811	40155889	.	-	.	nearest_ref "XM_036160881.1"; exon_number "2"; gene_id "118568312"; transcript_name "TCONS_00022949"; gene_biotype "protein_coding"; class_code "x"; transcript_id "TCONS_00022949"; gene_name "LOC118568312"; transcript_biotype "antisense"
NC_000083.7	Novogene	exon	40155941	40157249	.	-	.	nearest_ref "XM_036160881.1"; exon_number "3"; gene_id "118568312"; transcript_name "TCONS_00022949"; gene_biotype "protein_coding"; class_code "x"; transcript_id "TCONS_00022949"; gene_name "LOC118568312"; transcript_biotype "antisense"
NC_000083.7	Novogene	exon	40153888	40154178	.	-	.	nearest_ref "XM_036160881.1"; exon_number "1"; gene_id "118568312"; transcript_name "TCONS_00022952"; gene_biotype "protein_coding"; class_code "x"; transcript_id "TCONS_00022952"; gene_name "LOC118568312"; transcript_biotype "antisense"
NC_000083.7	Novogene	exon	40154331	40157250	.	-	.	nearest_ref "XM_036160881.1"; exon_number "2"; gene_id "118568312"; transcript_name "TCONS_00022952"; gene_biotype "protein_coding"; class_code "x"; transcript_id "TCONS_00022952"; gene_name "LOC118568312"; transcript_biotype "antisense"
NC_000083.7	Novogene	exon	40153888	40155767	.	-	.	nearest_ref "XM_036160881.1"; exon_number "1"; gene_id "118568312"; transcript_name "TCONS_00022951"; gene_biotype "protein_coding"; class_code "x"; transcript_id "TCONS_00022951"; gene_name "LOC118568312"; transcript_biotype "antisense"
NC_000083.7	Novogene	exon	40155811	40156106	.	-	.	nearest_ref "XM_036160881.1"; exon_number "2"; gene_id "118568312"; transcript_name "TCONS_00022951"; gene_biotype "protein_coding"; class_code "x"; transcript_id "TCONS_00022951"; gene_name "LOC118568312"; transcript_biotype "antisense"
NC_000083.7	Novogene	exon	40156180	40157250	.	-	.	nearest_ref "XM_036160881.1"; exon_number "3"; gene_id "118568312"; transcript_name "TCONS_00022951"; gene_biotype "protein_coding"; class_code "x"; transcript_id "TCONS_00022951"; gene_name "LOC118568312"; transcript_biotype "antisense"
NC_000083.7	Novogene	exon	40153888	40155767	.	-	.	nearest_ref "XM_036160881.1"; exon_number "1"; gene_id "118568312"; transcript_name "TCONS_00022950"; gene_biotype "protein_coding"; class_code "x"; transcript_id "TCONS_00022950"; gene_name "LOC118568312"; transcript_biotype "antisense"
NC_000083.7	Novogene	exon	40155811	40157250	.	-	.	nearest_ref "XM_036160881.1"; exon_number "2"; gene_id "118568312"; transcript_name "TCONS_00022950"; gene_biotype "protein_coding"; class_code "x"; transcript_id "TCONS_00022950"; gene_name "LOC118568312"; transcript_biotype "antisense"
NC_000083.7	Novogene	exon	40153888	40154263	.	-	.	nearest_ref "XM_036160881.1"; exon_number "1"; gene_id "118568312"; transcript_name "TCONS_00022953"; gene_biotype "protein_coding"; class_code "x"; transcript_id "TCONS_00022953"; gene_name "LOC118568312"; transcript_biotype "antisense"
NC_000083.7	Novogene	exon	40154412	40155767	.	-	.	nearest_ref "XM_036160881.1"; exon_number "2"; gene_id "118568312"; transcript_name "TCONS_00022953"; gene_biotype "protein_coding"; class_code "x"; transcript_id "TCONS_00022953"; gene_name "LOC118568312"; transcript_biotype "antisense"
NC_000083.7	Novogene	exon	40155811	40157263	.	-	.	nearest_ref "XM_036160881.1"; exon_number "3"; gene_id "118568312"; transcript_name "TCONS_00022953"; gene_biotype "protein_coding"; class_code "x"; transcript_id "TCONS_00022953"; gene_name "LOC118568312"; transcript_biotype "antisense"
NC_000083.7	Novogene	exon	40159059	40159643	.	-	.	nearest_ref "XR_877120.4"; exon_number "1"; gene_id "101056014"; transcript_name "TCONS_00022958"; gene_biotype "lncRNA"; class_code "o"; transcript_id "TCONS_00022958"; gene_name "AY036118"; transcript_biotype "sense_overlapping"
NC_000083.7	Novogene	exon	40159673	40159723	.	-	.	nearest_ref "XR_877120.4"; exon_number "2"; gene_id "101056014"; transcript_name "TCONS_00022958"; gene_biotype "lncRNA"; class_code "o"; transcript_id "TCONS_00022958"; gene_name "AY036118"; transcript_biotype "sense_overlapping"
NC_000083.7	Novogene	exon	47159853	47168080	.	-	.	nearest_ref "XM_036160441.1"; exon_number "1"; gene_id "210982"; transcript_name "TCONS_00023010"; gene_biotype "protein_coding"; class_code "o"; transcript_id "TCONS_00023010"; gene_name "Bicral"; transcript_biotype "sense_overlapping"
NC_000083.7	Novogene	exon	47168174	47168578	.	-	.	nearest_ref "XM_036160441.1"; exon_number "2"; gene_id "210982"; transcript_name "TCONS_00023010"; gene_biotype "protein_coding"; class_code "o"; transcript_id "TCONS_00023010"; gene_name "Bicral"; transcript_biotype "sense_overlapping"
NC_000083.7	Novogene	exon	67174895	67179186	.	-	.	nearest_ref "NM_001357625.1"; exon_number "1"; gene_id "19274"; transcript_name "TCONS_00023125"; gene_biotype "protein_coding"; class_code "j"; transcript_id "TCONS_00023125"; gene_name "Ptprm"; transcript_biotype "others"
NC_000083.7	Novogene	exon	67197919	67198569	.	-	.	nearest_ref "NM_001357625.1"; exon_number "2"; gene_id "19274"; transcript_name "TCONS_00023125"; gene_biotype "protein_coding"; class_code "j"; transcript_id "TCONS_00023125"; gene_name "Ptprm"; transcript_biotype "others"
NC_000083.7	Novogene	exon	67445309	67446530	.	-	.	nearest_ref "NM_001357625.1"; exon_number "1"; gene_id "19274"; transcript_name "TCONS_00023127"; gene_biotype "protein_coding"; class_code "i"; transcript_id "TCONS_00023127"; gene_name "Ptprm"; transcript_biotype "sense_intronic"
NC_000083.7	Novogene	exon	67459143	67470619	.	-	.	nearest_ref "NM_001357625.1"; exon_number "2"; gene_id "19274"; transcript_name "TCONS_00023127"; gene_biotype "protein_coding"; class_code "i"; transcript_id "TCONS_00023127"; gene_name "Ptprm"; transcript_biotype "sense_intronic"
NC_000083.7	Novogene	exon	67597602	67608815	.	-	.	nearest_ref "NM_001357625.1"; exon_number "1"; gene_id "19274"; transcript_name "TCONS_00023128"; gene_biotype "protein_coding"; class_code "i"; transcript_id "TCONS_00023128"; gene_name "Ptprm"; transcript_biotype "sense_intronic"
NC_000083.7	Novogene	exon	67608907	67615274	.	-	.	nearest_ref "NM_001357625.1"; exon_number "2"; gene_id "19274"; transcript_name "TCONS_00023128"; gene_biotype "protein_coding"; class_code "i"; transcript_id "TCONS_00023128"; gene_name "Ptprm"; transcript_biotype "sense_intronic"
NC_000083.7	Novogene	exon	71895382	71895979	.	-	.	nearest_ref "NR_015549.1"; exon_number "1"; gene_id "68789"; transcript_name "TCONS_00023141"; gene_biotype "lncRNA"; class_code "j"; transcript_id "TCONS_00023141"; gene_name "Trmt61b"; transcript_biotype "lincRNA"
NC_000083.7	Novogene	exon	71897483	71897517	.	-	.	nearest_ref "NR_015549.1"; exon_number "2"; gene_id "68789"; transcript_name "TCONS_00023141"; gene_biotype "lncRNA"; class_code "j"; transcript_id "TCONS_00023141"; gene_name "Trmt61b"; transcript_biotype "lincRNA"
NC_000083.7	Novogene	exon	71904931	71905752	.	-	.	nearest_ref "NR_015549.1"; exon_number "3"; gene_id "68789"; transcript_name "TCONS_00023141"; gene_biotype "lncRNA"; class_code "j"; transcript_id "TCONS_00023141"; gene_name "Trmt61b"; transcript_biotype "lincRNA"
NC_000083.7	Novogene	exon	73246754	73248646	.	-	.	nearest_ref "NM_029999.4"; exon_number "1"; gene_id "77889"; transcript_name "TCONS_00023146"; gene_biotype "protein_coding"; class_code "x"; transcript_id "TCONS_00023146"; gene_name "Lbh"; transcript_biotype "antisense"
NC_000083.7	Novogene	exon	73248674	73248832	.	-	.	nearest_ref "NM_029999.4"; exon_number "2"; gene_id "77889"; transcript_name "TCONS_00023146"; gene_biotype "protein_coding"; class_code "x"; transcript_id "TCONS_00023146"; gene_name "Lbh"; transcript_biotype "antisense"
NC_000083.7	Novogene	exon	83453663	83460652	.	-	.	exon_number "1"; gene_id "XLOC_013791"; transcript_name "TCONS_00023197"; gene_biotype "novel"; class_code "u"; transcript_id "TCONS_00023197"; gene_name "XLOC_013791"; transcript_biotype "lincRNA"
NC_000083.7	Novogene	exon	83462086	83463030	.	-	.	exon_number "2"; gene_id "XLOC_013791"; transcript_name "TCONS_00023197"; gene_biotype "novel"; class_code "u"; transcript_id "TCONS_00023197"; gene_name "XLOC_013791"; transcript_biotype "lincRNA"
NC_000083.7	Novogene	exon	88328439	88334809	.	-	.	nearest_ref "NM_001081034.3"; exon_number "1"; gene_id "225055"; transcript_name "TCONS_00023223"; gene_biotype "protein_coding"; class_code "i"; transcript_id "TCONS_00023223"; gene_name "Fbxo11"; transcript_biotype "sense_intronic"
NC_000083.7	Novogene	exon	88340531	88344269	.	-	.	nearest_ref "NM_001081034.3"; exon_number "2"; gene_id "225055"; transcript_name "TCONS_00023223"; gene_biotype "protein_coding"; class_code "i"; transcript_id "TCONS_00023223"; gene_name "Fbxo11"; transcript_biotype "sense_intronic"
NC_000084.7	Novogene	exon	4994607	4995149	.	+	.	nearest_ref "XM_006525794.5"; exon_number "1"; gene_id "225115"; transcript_name "TCONS_00023245"; gene_biotype "protein_coding"; class_code "j"; transcript_id "TCONS_00023245"; gene_name "Svil"; transcript_biotype "others"
NC_000084.7	Novogene	exon	5002073	5004331	.	+	.	nearest_ref "XM_006525794.5"; exon_number "2"; gene_id "225115"; transcript_name "TCONS_00023245"; gene_biotype "protein_coding"; class_code "j"; transcript_id "TCONS_00023245"; gene_name "Svil"; transcript_biotype "others"
NC_000084.7	Novogene	exon	35167079	35174632	.	+	.	nearest_ref "XR_001782428.3"; exon_number "1"; gene_id "100041951"; transcript_name "TCONS_00023360"; gene_biotype "lncRNA"; class_code "x"; transcript_id "TCONS_00023360"; gene_name "Gm3587"; transcript_biotype "antisense"
NC_000084.7	Novogene	exon	35191899	35192021	.	+	.	nearest_ref "XR_001782428.3"; exon_number "2"; gene_id "100041951"; transcript_name "TCONS_00023360"; gene_biotype "lncRNA"; class_code "x"; transcript_id "TCONS_00023360"; gene_name "Gm3587"; transcript_biotype "antisense"
NC_000084.7	Novogene	exon	35192525	35193613	.	+	.	nearest_ref "XR_001782428.3"; exon_number "3"; gene_id "100041951"; transcript_name "TCONS_00023360"; gene_biotype "lncRNA"; class_code "x"; transcript_id "TCONS_00023360"; gene_name "Gm3587"; transcript_biotype "antisense"
NC_000084.7	Novogene	exon	35167194	35183921	.	+	.	exon_number "1"; gene_id "XLOC_013883"; transcript_name "TCONS_00023361"; gene_biotype "novel"; class_code "u"; transcript_id "TCONS_00023361"; gene_name "XLOC_013883"; transcript_biotype "lincRNA"
NC_000084.7	Novogene	exon	35184000	35184244	.	+	.	exon_number "2"; gene_id "XLOC_013883"; transcript_name "TCONS_00023361"; gene_biotype "novel"; class_code "u"; transcript_id "TCONS_00023361"; gene_name "XLOC_013883"; transcript_biotype "lincRNA"
NC_000084.7	Novogene	exon	36476027	36476277	.	+	.	nearest_ref "NM_001368637.1"; exon_number "1"; gene_id "66060"; transcript_name "TCONS_00023378"; gene_biotype "protein_coding"; class_code "j"; transcript_id "TCONS_00023378"; gene_name "Cystm1"; transcript_biotype "others"
NC_000084.7	Novogene	exon	36499568	36499794	.	+	.	nearest_ref "NM_001368637.1"; exon_number "2"; gene_id "66060"; transcript_name "TCONS_00023378"; gene_biotype "protein_coding"; class_code "j"; transcript_id "TCONS_00023378"; gene_name "Cystm1"; transcript_biotype "others"
NC_000084.7	Novogene	exon	36535550	36536032	.	+	.	nearest_ref "NM_001368637.1"; exon_number "3"; gene_id "66060"; transcript_name "TCONS_00023378"; gene_biotype "protein_coding"; class_code "j"; transcript_id "TCONS_00023378"; gene_name "Cystm1"; transcript_biotype "others"
NC_000084.7	Novogene	exon	36482003	36482239	.	+	.	nearest_ref "NM_001368637.1"; exon_number "1"; gene_id "66060"; transcript_name "TCONS_00023381"; gene_biotype "protein_coding"; class_code "j"; transcript_id "TCONS_00023381"; gene_name "Cystm1"; transcript_biotype "others"
NC_000084.7	Novogene	exon	36499568	36499794	.	+	.	nearest_ref "NM_001368637.1"; exon_number "2"; gene_id "66060"; transcript_name "TCONS_00023381"; gene_biotype "protein_coding"; class_code "j"; transcript_id "TCONS_00023381"; gene_name "Cystm1"; transcript_biotype "others"
NC_000084.7	Novogene	exon	36535550	36536032	.	+	.	nearest_ref "NM_001368637.1"; exon_number "3"; gene_id "66060"; transcript_name "TCONS_00023381"; gene_biotype "protein_coding"; class_code "j"; transcript_id "TCONS_00023381"; gene_name "Cystm1"; transcript_biotype "others"
NC_000084.7	Novogene	exon	58810563	58811639	.	+	.	nearest_ref "NM_025478.3"; exon_number "1"; gene_id "66307"; transcript_name "TCONS_00023493"; gene_biotype "protein_coding"; class_code "o"; transcript_id "TCONS_00023493"; gene_name "Isoc1"; transcript_biotype "sense_overlapping"
NC_000084.7	Novogene	exon	58811762	58813438	.	+	.	nearest_ref "NM_025478.3"; exon_number "2"; gene_id "66307"; transcript_name "TCONS_00023493"; gene_biotype "protein_coding"; class_code "o"; transcript_id "TCONS_00023493"; gene_name "Isoc1"; transcript_biotype "sense_overlapping"
NC_000084.7	Novogene	exon	69506516	69511607	.	+	.	nearest_ref "XR_004939838.1"; exon_number "1"; gene_id "21413"; transcript_name "TCONS_00023563"; gene_biotype "protein_coding"; class_code "i"; transcript_id "TCONS_00023563"; gene_name "Tcf4"; transcript_biotype "sense_intronic"
NC_000084.7	Novogene	exon	69527854	69529887	.	+	.	nearest_ref "XR_004939838.1"; exon_number "2"; gene_id "21413"; transcript_name "TCONS_00023563"; gene_biotype "protein_coding"; class_code "i"; transcript_id "TCONS_00023563"; gene_name "Tcf4"; transcript_biotype "sense_intronic"
NC_000084.7	Novogene	exon	73481903	73482247	.	+	.	exon_number "1"; gene_id "XLOC_013992"; transcript_name "TCONS_00023568"; gene_biotype "novel"; class_code "u"; transcript_id "TCONS_00023568"; gene_name "XLOC_013992"; transcript_biotype "lincRNA"
NC_000084.7	Novogene	exon	73482460	73482547	.	+	.	exon_number "2"; gene_id "XLOC_013992"; transcript_name "TCONS_00023568"; gene_biotype "novel"; class_code "u"; transcript_id "TCONS_00023568"; gene_name "XLOC_013992"; transcript_biotype "lincRNA"
NC_000084.7	Novogene	exon	77139903	77139919	.	+	.	nearest_ref "XR_001782349.3"; exon_number "1"; gene_id "17344"; transcript_name "TCONS_00023597"; gene_biotype "protein_coding"; class_code "o"; transcript_id "TCONS_00023597"; gene_name "Pias2"; transcript_biotype "sense_overlapping"
NC_000084.7	Novogene	exon	77155524	77160294	.	+	.	nearest_ref "XR_001782349.3"; exon_number "2"; gene_id "17344"; transcript_name "TCONS_00023597"; gene_biotype "protein_coding"; class_code "o"; transcript_id "TCONS_00023597"; gene_name "Pias2"; transcript_biotype "sense_overlapping"
NC_000084.7	Novogene	exon	82710413	82710762	.	+	.	nearest_ref "XM_006526494.5"; exon_number "1"; gene_id "329002"; transcript_name "TCONS_00023618"; gene_biotype "protein_coding"; class_code "x"; transcript_id "TCONS_00023618"; gene_name "Zfp236"; transcript_biotype "antisense"
NC_000084.7	Novogene	exon	82710921	82711773	.	+	.	nearest_ref "XM_006526494.5"; exon_number "2"; gene_id "329002"; transcript_name "TCONS_00023618"; gene_biotype "protein_coding"; class_code "x"; transcript_id "TCONS_00023618"; gene_name "Zfp236"; transcript_biotype "antisense"
NC_000084.7	Novogene	exon	11043738	11045193	.	-	.	nearest_ref "NR_105023.1"; exon_number "1"; gene_id "68434"; transcript_name "TCONS_00023662"; gene_biotype "lncRNA"; class_code "j"; transcript_id "TCONS_00023662"; gene_name "Gata6os"; transcript_biotype "lincRNA"
NC_000084.7	Novogene	exon	11047555	11047678	.	-	.	nearest_ref "NR_105023.1"; exon_number "2"; gene_id "68434"; transcript_name "TCONS_00023662"; gene_biotype "lncRNA"; class_code "j"; transcript_id "TCONS_00023662"; gene_name "Gata6os"; transcript_biotype "lincRNA"
NC_000084.7	Novogene	exon	11050624	11050821	.	-	.	nearest_ref "NR_105023.1"; exon_number "3"; gene_id "68434"; transcript_name "TCONS_00023662"; gene_biotype "lncRNA"; class_code "j"; transcript_id "TCONS_00023662"; gene_name "Gata6os"; transcript_biotype "lincRNA"
NC_000084.7	Novogene	exon	11051258	11052381	.	-	.	nearest_ref "NR_105023.1"; exon_number "4"; gene_id "68434"; transcript_name "TCONS_00023662"; gene_biotype "lncRNA"; class_code "j"; transcript_id "TCONS_00023662"; gene_name "Gata6os"; transcript_biotype "lincRNA"
NC_000084.7	Novogene	exon	16742488	16742711	.	-	.	nearest_ref "NM_007664.5"; exon_number "1"; gene_id "12558"; transcript_name "TCONS_00023682"; gene_biotype "protein_coding"; class_code "o"; transcript_id "TCONS_00023682"; gene_name "Cdh2"; transcript_biotype "sense_overlapping"
NC_000084.7	Novogene	exon	16795365	16827566	.	-	.	nearest_ref "NM_007664.5"; exon_number "2"; gene_id "12558"; transcript_name "TCONS_00023682"; gene_biotype "protein_coding"; class_code "o"; transcript_id "TCONS_00023682"; gene_name "Cdh2"; transcript_biotype "sense_overlapping"
NC_000084.7	Novogene	exon	26134666	26136462	.	-	.	nearest_ref "XR_877236.4"; exon_number "1"; gene_id "102636049"; transcript_name "TCONS_00023711"; gene_biotype "lncRNA"; class_code "i"; transcript_id "TCONS_00023711"; gene_name "Gm33228"; transcript_biotype "sense_intronic"
NC_000084.7	Novogene	exon	26141049	26141211	.	-	.	nearest_ref "XR_877236.4"; exon_number "2"; gene_id "102636049"; transcript_name "TCONS_00023711"; gene_biotype "lncRNA"; class_code "i"; transcript_id "TCONS_00023711"; gene_name "Gm33228"; transcript_biotype "sense_intronic"
NC_000084.7	Novogene	exon	26134956	26136289	.	-	.	nearest_ref "XR_877236.4"; exon_number "1"; gene_id "102636049"; transcript_name "TCONS_00023712"; gene_biotype "lncRNA"; class_code "i"; transcript_id "TCONS_00023712"; gene_name "Gm33228"; transcript_biotype "sense_intronic"
NC_000084.7	Novogene	exon	26140876	26141211	.	-	.	nearest_ref "XR_877236.4"; exon_number "2"; gene_id "102636049"; transcript_name "TCONS_00023712"; gene_biotype "lncRNA"; class_code "i"; transcript_id "TCONS_00023712"; gene_name "Gm33228"; transcript_biotype "sense_intronic"
NC_000084.7	Novogene	exon	26136167	26136549	.	-	.	nearest_ref "XR_877236.4"; exon_number "1"; gene_id "102636049"; transcript_name "TCONS_00023713"; gene_biotype "lncRNA"; class_code "i"; transcript_id "TCONS_00023713"; gene_name "Gm33228"; transcript_biotype "sense_intronic"
NC_000084.7	Novogene	exon	26141136	26141211	.	-	.	nearest_ref "XR_877236.4"; exon_number "2"; gene_id "102636049"; transcript_name "TCONS_00023713"; gene_biotype "lncRNA"; class_code "i"; transcript_id "TCONS_00023713"; gene_name "Gm33228"; transcript_biotype "sense_intronic"
NC_000084.7	Novogene	exon	61610038	61617957	.	-	.	nearest_ref "NR_045419.1"; exon_number "1"; gene_id "442846"; transcript_name "TCONS_00023840"; gene_biotype "lncRNA"; class_code "o"; transcript_id "TCONS_00023840"; gene_name "Lncbate10"; transcript_biotype "sense_overlapping"
NC_000084.7	Novogene	exon	61619423	61619899	.	-	.	nearest_ref "NR_045419.1"; exon_number "2"; gene_id "442846"; transcript_name "TCONS_00023840"; gene_biotype "lncRNA"; class_code "o"; transcript_id "TCONS_00023840"; gene_name "Lncbate10"; transcript_biotype "sense_overlapping"
NC_000084.7	Novogene	exon	61772700	61772839	.	-	.	nearest_ref "NR_045402.1"; exon_number "1"; gene_id "328968"; transcript_name "TCONS_00023843"; gene_biotype "lncRNA"; class_code "j"; transcript_id "TCONS_00023843"; gene_name "Carmn"; transcript_biotype "lincRNA"
NC_000084.7	Novogene	exon	61778234	61785477	.	-	.	nearest_ref "NR_045402.1"; exon_number "2"; gene_id "328968"; transcript_name "TCONS_00023843"; gene_biotype "lncRNA"; class_code "j"; transcript_id "TCONS_00023843"; gene_name "Carmn"; transcript_biotype "lincRNA"
NC_000084.7	Novogene	exon	61787501	61787609	.	-	.	nearest_ref "NR_045402.1"; exon_number "3"; gene_id "328968"; transcript_name "TCONS_00023843"; gene_biotype "lncRNA"; class_code "j"; transcript_id "TCONS_00023843"; gene_name "Carmn"; transcript_biotype "lincRNA"
NC_000084.7	Novogene	exon	61798373	61799240	.	-	.	nearest_ref "NR_045402.1"; exon_number "4"; gene_id "328968"; transcript_name "TCONS_00023843"; gene_biotype "lncRNA"; class_code "j"; transcript_id "TCONS_00023843"; gene_name "Carmn"; transcript_biotype "lincRNA"
NC_000084.7	Novogene	exon	61780898	61783221	.	-	.	nearest_ref "NR_045402.1"; exon_number "1"; gene_id "328968"; transcript_name "TCONS_00023844"; gene_biotype "lncRNA"; class_code "j"; transcript_id "TCONS_00023844"; gene_name "Carmn"; transcript_biotype "lincRNA"
NC_000084.7	Novogene	exon	61785314	61785477	.	-	.	nearest_ref "NR_045402.1"; exon_number "2"; gene_id "328968"; transcript_name "TCONS_00023844"; gene_biotype "lncRNA"; class_code "j"; transcript_id "TCONS_00023844"; gene_name "Carmn"; transcript_biotype "lincRNA"
NC_000084.7	Novogene	exon	61787501	61787609	.	-	.	nearest_ref "NR_045402.1"; exon_number "3"; gene_id "328968"; transcript_name "TCONS_00023844"; gene_biotype "lncRNA"; class_code "j"; transcript_id "TCONS_00023844"; gene_name "Carmn"; transcript_biotype "lincRNA"
NC_000084.7	Novogene	exon	61798373	61798556	.	-	.	nearest_ref "NR_045402.1"; exon_number "4"; gene_id "328968"; transcript_name "TCONS_00023844"; gene_biotype "lncRNA"; class_code "j"; transcript_id "TCONS_00023844"; gene_name "Carmn"; transcript_biotype "lincRNA"
NC_000084.7	Novogene	exon	74911012	74911202	.	-	.	nearest_ref "XR_877549.3"; exon_number "1"; gene_id "105246489"; transcript_name "TCONS_00023894"; gene_biotype "lncRNA"; class_code "j"; transcript_id "TCONS_00023894"; gene_name "Gm41774"; transcript_biotype "lincRNA"
NC_000084.7	Novogene	exon	74911656	74911771	.	-	.	nearest_ref "XR_877549.3"; exon_number "2"; gene_id "105246489"; transcript_name "TCONS_00023894"; gene_biotype "lncRNA"; class_code "j"; transcript_id "TCONS_00023894"; gene_name "Gm41774"; transcript_biotype "lincRNA"
NC_000084.7	Novogene	exon	79029207	79035255	.	-	.	nearest_ref "NM_053099.3"; exon_number "1"; gene_id "240427"; transcript_name "TCONS_00023909"; gene_biotype "protein_coding"; class_code "i"; transcript_id "TCONS_00023909"; gene_name "Setbp1"; transcript_biotype "sense_intronic"
NC_000084.7	Novogene	exon	79056241	79058025	.	-	.	nearest_ref "NM_053099.3"; exon_number "2"; gene_id "240427"; transcript_name "TCONS_00023909"; gene_biotype "protein_coding"; class_code "i"; transcript_id "TCONS_00023909"; gene_name "Setbp1"; transcript_biotype "sense_intronic"
NC_000085.7	Novogene	exon	5845773	5851416	.	+	.	nearest_ref "NR_002847.3"; exon_number "1"; gene_id "72289"; transcript_name "TCONS_00024026"; gene_biotype "lncRNA"; class_code "x"; transcript_id "TCONS_00024026"; gene_name "Malat1"; transcript_biotype "antisense"
NC_000085.7	Novogene	exon	5851861	5852691	.	+	.	nearest_ref "NR_002847.3"; exon_number "2"; gene_id "72289"; transcript_name "TCONS_00024026"; gene_biotype "lncRNA"; class_code "x"; transcript_id "TCONS_00024026"; gene_name "Malat1"; transcript_biotype "antisense"
NC_000085.7	Novogene	exon	5845773	5851407	.	+	.	nearest_ref "NR_002847.3"; exon_number "1"; gene_id "72289"; transcript_name "TCONS_00024027"; gene_biotype "lncRNA"; class_code "x"; transcript_id "TCONS_00024027"; gene_name "Malat1"; transcript_biotype "antisense"
NC_000085.7	Novogene	exon	5851861	5852725	.	+	.	nearest_ref "NR_002847.3"; exon_number "2"; gene_id "72289"; transcript_name "TCONS_00024027"; gene_biotype "lncRNA"; class_code "x"; transcript_id "TCONS_00024027"; gene_name "Malat1"; transcript_biotype "antisense"
NC_000085.7	Novogene	exon	5845806	5846647	.	+	.	nearest_ref "NR_131212.1"; exon_number "1"; gene_id "66961"; transcript_name "TCONS_00024028"; gene_biotype "lncRNA"; class_code "x"; transcript_id "TCONS_00024028"; gene_name "Neat1"; transcript_biotype "antisense"
NC_000085.7	Novogene	exon	5874756	5895550	.	+	.	nearest_ref "NR_131212.1"; exon_number "2"; gene_id "66961"; transcript_name "TCONS_00024028"; gene_biotype "lncRNA"; class_code "x"; transcript_id "TCONS_00024028"; gene_name "Neat1"; transcript_biotype "antisense"
NC_000085.7	Novogene	exon	5845906	5848924	.	+	.	nearest_ref "NR_002847.3"; exon_number "1"; gene_id "72289"; transcript_name "TCONS_00024031"; gene_biotype "lncRNA"; class_code "x"; transcript_id "TCONS_00024031"; gene_name "Malat1"; transcript_biotype "antisense"
NC_000085.7	Novogene	exon	5849526	5851407	.	+	.	nearest_ref "NR_002847.3"; exon_number "2"; gene_id "72289"; transcript_name "TCONS_00024031"; gene_biotype "lncRNA"; class_code "x"; transcript_id "TCONS_00024031"; gene_name "Malat1"; transcript_biotype "antisense"
NC_000085.7	Novogene	exon	5851861	5852690	.	+	.	nearest_ref "NR_002847.3"; exon_number "3"; gene_id "72289"; transcript_name "TCONS_00024031"; gene_biotype "lncRNA"; class_code "x"; transcript_id "TCONS_00024031"; gene_name "Malat1"; transcript_biotype "antisense"
NC_000085.7	Novogene	exon	5845906	5848928	.	+	.	nearest_ref "NR_002847.3"; exon_number "1"; gene_id "72289"; transcript_name "TCONS_00024030"; gene_biotype "lncRNA"; class_code "x"; transcript_id "TCONS_00024030"; gene_name "Malat1"; transcript_biotype "antisense"
NC_000085.7	Novogene	exon	5851861	5852690	.	+	.	nearest_ref "NR_002847.3"; exon_number "2"; gene_id "72289"; transcript_name "TCONS_00024030"; gene_biotype "lncRNA"; class_code "x"; transcript_id "TCONS_00024030"; gene_name "Malat1"; transcript_biotype "antisense"
NC_000085.7	Novogene	exon	5845906	5848924	.	+	.	nearest_ref "NR_002847.3"; exon_number "1"; gene_id "72289"; transcript_name "TCONS_00024029"; gene_biotype "lncRNA"; class_code "x"; transcript_id "TCONS_00024029"; gene_name "Malat1"; transcript_biotype "antisense"
NC_000085.7	Novogene	exon	5849526	5852690	.	+	.	nearest_ref "NR_002847.3"; exon_number "2"; gene_id "72289"; transcript_name "TCONS_00024029"; gene_biotype "lncRNA"; class_code "x"; transcript_id "TCONS_00024029"; gene_name "Malat1"; transcript_biotype "antisense"
NC_000085.7	Novogene	exon	5846003	5850575	.	+	.	nearest_ref "NR_002847.3"; exon_number "1"; gene_id "72289"; transcript_name "TCONS_00024032"; gene_biotype "lncRNA"; class_code "x"; transcript_id "TCONS_00024032"; gene_name "Malat1"; transcript_biotype "antisense"
NC_000085.7	Novogene	exon	5850701	5850866	.	+	.	nearest_ref "NR_002847.3"; exon_number "2"; gene_id "72289"; transcript_name "TCONS_00024032"; gene_biotype "lncRNA"; class_code "x"; transcript_id "TCONS_00024032"; gene_name "Malat1"; transcript_biotype "antisense"
NC_000085.7	Novogene	exon	5851019	5852690	.	+	.	nearest_ref "NR_002847.3"; exon_number "3"; gene_id "72289"; transcript_name "TCONS_00024032"; gene_biotype "lncRNA"; class_code "x"; transcript_id "TCONS_00024032"; gene_name "Malat1"; transcript_biotype "antisense"
NC_000085.7	Novogene	exon	5846095	5849140	.	+	.	nearest_ref "NR_002847.3"; exon_number "1"; gene_id "72289"; transcript_name "TCONS_00024033"; gene_biotype "lncRNA"; class_code "x"; transcript_id "TCONS_00024033"; gene_name "Malat1"; transcript_biotype "antisense"
NC_000085.7	Novogene	exon	5849162	5852691	.	+	.	nearest_ref "NR_002847.3"; exon_number "2"; gene_id "72289"; transcript_name "TCONS_00024033"; gene_biotype "lncRNA"; class_code "x"; transcript_id "TCONS_00024033"; gene_name "Malat1"; transcript_biotype "antisense"
NC_000085.7	Novogene	exon	5846096	5847920	.	+	.	nearest_ref "NR_002847.3"; exon_number "1"; gene_id "72289"; transcript_name "TCONS_00024034"; gene_biotype "lncRNA"; class_code "x"; transcript_id "TCONS_00024034"; gene_name "Malat1"; transcript_biotype "antisense"
NC_000085.7	Novogene	exon	5848064	5851407	.	+	.	nearest_ref "NR_002847.3"; exon_number "2"; gene_id "72289"; transcript_name "TCONS_00024034"; gene_biotype "lncRNA"; class_code "x"; transcript_id "TCONS_00024034"; gene_name "Malat1"; transcript_biotype "antisense"
NC_000085.7	Novogene	exon	5851861	5852690	.	+	.	nearest_ref "NR_002847.3"; exon_number "3"; gene_id "72289"; transcript_name "TCONS_00024034"; gene_biotype "lncRNA"; class_code "x"; transcript_id "TCONS_00024034"; gene_name "Malat1"; transcript_biotype "antisense"
NC_000085.7	Novogene	exon	5846096	5847920	.	+	.	nearest_ref "NR_002847.3"; exon_number "1"; gene_id "72289"; transcript_name "TCONS_00024035"; gene_biotype "lncRNA"; class_code "x"; transcript_id "TCONS_00024035"; gene_name "Malat1"; transcript_biotype "antisense"
NC_000085.7	Novogene	exon	5848064	5852692	.	+	.	nearest_ref "NR_002847.3"; exon_number "2"; gene_id "72289"; transcript_name "TCONS_00024035"; gene_biotype "lncRNA"; class_code "x"; transcript_id "TCONS_00024035"; gene_name "Malat1"; transcript_biotype "antisense"
NC_000085.7	Novogene	exon	5846097	5849383	.	+	.	nearest_ref "NR_002847.3"; exon_number "1"; gene_id "72289"; transcript_name "TCONS_00024036"; gene_biotype "lncRNA"; class_code "x"; transcript_id "TCONS_00024036"; gene_name "Malat1"; transcript_biotype "antisense"
NC_000085.7	Novogene	exon	5849526	5852690	.	+	.	nearest_ref "NR_002847.3"; exon_number "2"; gene_id "72289"; transcript_name "TCONS_00024036"; gene_biotype "lncRNA"; class_code "x"; transcript_id "TCONS_00024036"; gene_name "Malat1"; transcript_biotype "antisense"
NC_000085.7	Novogene	exon	5846103	5847920	.	+	.	nearest_ref "NR_002847.3"; exon_number "1"; gene_id "72289"; transcript_name "TCONS_00024037"; gene_biotype "lncRNA"; class_code "x"; transcript_id "TCONS_00024037"; gene_name "Malat1"; transcript_biotype "antisense"
NC_000085.7	Novogene	exon	5848064	5849140	.	+	.	nearest_ref "NR_002847.3"; exon_number "2"; gene_id "72289"; transcript_name "TCONS_00024037"; gene_biotype "lncRNA"; class_code "x"; transcript_id "TCONS_00024037"; gene_name "Malat1"; transcript_biotype "antisense"
NC_000085.7	Novogene	exon	5849162	5852690	.	+	.	nearest_ref "NR_002847.3"; exon_number "3"; gene_id "72289"; transcript_name "TCONS_00024037"; gene_biotype "lncRNA"; class_code "x"; transcript_id "TCONS_00024037"; gene_name "Malat1"; transcript_biotype "antisense"
NC_000085.7	Novogene	exon	5846103	5847748	.	+	.	nearest_ref "NR_002847.3"; exon_number "1"; gene_id "72289"; transcript_name "TCONS_00024038"; gene_biotype "lncRNA"; class_code "x"; transcript_id "TCONS_00024038"; gene_name "Malat1"; transcript_biotype "antisense"
NC_000085.7	Novogene	exon	5848064	5849140	.	+	.	nearest_ref "NR_002847.3"; exon_number "2"; gene_id "72289"; transcript_name "TCONS_00024038"; gene_biotype "lncRNA"; class_code "x"; transcript_id "TCONS_00024038"; gene_name "Malat1"; transcript_biotype "antisense"
NC_000085.7	Novogene	exon	5849162	5852692	.	+	.	nearest_ref "NR_002847.3"; exon_number "3"; gene_id "72289"; transcript_name "TCONS_00024038"; gene_biotype "lncRNA"; class_code "x"; transcript_id "TCONS_00024038"; gene_name "Malat1"; transcript_biotype "antisense"
NC_000085.7	Novogene	exon	5846104	5846955	.	+	.	nearest_ref "NR_002847.3"; exon_number "1"; gene_id "72289"; transcript_name "TCONS_00024039"; gene_biotype "lncRNA"; class_code "x"; transcript_id "TCONS_00024039"; gene_name "Malat1"; transcript_biotype "antisense"
NC_000085.7	Novogene	exon	5846976	5852690	.	+	.	nearest_ref "NR_002847.3"; exon_number "2"; gene_id "72289"; transcript_name "TCONS_00024039"; gene_biotype "lncRNA"; class_code "x"; transcript_id "TCONS_00024039"; gene_name "Malat1"; transcript_biotype "antisense"
NC_000085.7	Novogene	exon	5846104	5846647	.	+	.	nearest_ref "NR_131212.1"; exon_number "1"; gene_id "66961"; transcript_name "TCONS_00024040"; gene_biotype "lncRNA"; class_code "x"; transcript_id "TCONS_00024040"; gene_name "Neat1"; transcript_biotype "antisense"
NC_000085.7	Novogene	exon	5874756	5876598	.	+	.	nearest_ref "NR_131212.1"; exon_number "2"; gene_id "66961"; transcript_name "TCONS_00024040"; gene_biotype "lncRNA"; class_code "x"; transcript_id "TCONS_00024040"; gene_name "Neat1"; transcript_biotype "antisense"
NC_000085.7	Novogene	exon	5876657	5878156	.	+	.	nearest_ref "NR_131212.1"; exon_number "3"; gene_id "66961"; transcript_name "TCONS_00024040"; gene_biotype "lncRNA"; class_code "x"; transcript_id "TCONS_00024040"; gene_name "Neat1"; transcript_biotype "antisense"
NC_000085.7	Novogene	exon	5846105	5851347	.	+	.	nearest_ref "NR_002847.3"; exon_number "1"; gene_id "72289"; transcript_name "TCONS_00024041"; gene_biotype "lncRNA"; class_code "x"; transcript_id "TCONS_00024041"; gene_name "Malat1"; transcript_biotype "antisense"
NC_000085.7	Novogene	exon	5851399	5852725	.	+	.	nearest_ref "NR_002847.3"; exon_number "2"; gene_id "72289"; transcript_name "TCONS_00024041"; gene_biotype "lncRNA"; class_code "x"; transcript_id "TCONS_00024041"; gene_name "Malat1"; transcript_biotype "antisense"
NC_000085.7	Novogene	exon	9805998	9806406	.	+	.	exon_number "1"; gene_id "XLOC_014339"; transcript_name "TCONS_00024161"; gene_biotype "novel"; class_code "u"; transcript_id "TCONS_00024161"; gene_name "XLOC_014339"; transcript_biotype "lincRNA"
NC_000085.7	Novogene	exon	9814398	9814529	.	+	.	exon_number "2"; gene_id "XLOC_014339"; transcript_name "TCONS_00024161"; gene_biotype "novel"; class_code "u"; transcript_id "TCONS_00024161"; gene_name "XLOC_014339"; transcript_biotype "lincRNA"
NC_000085.7	Novogene	exon	9806265	9806492	.	+	.	exon_number "1"; gene_id "XLOC_014339"; transcript_name "TCONS_00024162"; gene_biotype "novel"; class_code "u"; transcript_id "TCONS_00024162"; gene_name "XLOC_014339"; transcript_biotype "lincRNA"
NC_000085.7	Novogene	exon	9814484	9814528	.	+	.	exon_number "2"; gene_id "XLOC_014339"; transcript_name "TCONS_00024162"; gene_biotype "novel"; class_code "u"; transcript_id "TCONS_00024162"; gene_name "XLOC_014339"; transcript_biotype "lincRNA"
NC_000085.7	Novogene	exon	29044724	29044982	.	+	.	nearest_ref "NR_045687.1"; exon_number "1"; gene_id "100503337"; transcript_name "TCONS_00024277"; gene_biotype "lncRNA"; class_code "j"; transcript_id "TCONS_00024277"; gene_name "Gm9895"; transcript_biotype "lincRNA"
NC_000085.7	Novogene	exon	29046317	29053692	.	+	.	nearest_ref "NR_045687.1"; exon_number "2"; gene_id "100503337"; transcript_name "TCONS_00024277"; gene_biotype "lncRNA"; class_code "j"; transcript_id "TCONS_00024277"; gene_name "Gm9895"; transcript_biotype "lincRNA"
NC_000085.7	Novogene	exon	41471121	41471222	.	+	.	nearest_ref "NM_001370767.1"; exon_number "1"; gene_id "212391"; transcript_name "TCONS_00024346"; gene_biotype "protein_coding"; class_code "j"; transcript_id "TCONS_00024346"; gene_name "Lcor"; transcript_biotype "others"
NC_000085.7	Novogene	exon	41471966	41490283	.	+	.	nearest_ref "NM_001370767.1"; exon_number "2"; gene_id "212391"; transcript_name "TCONS_00024346"; gene_biotype "protein_coding"; class_code "j"; transcript_id "TCONS_00024346"; gene_name "Lcor"; transcript_biotype "others"
NC_000085.7	Novogene	exon	41493585	41502265	.	+	.	nearest_ref "NM_001370767.1"; exon_number "3"; gene_id "212391"; transcript_name "TCONS_00024346"; gene_biotype "protein_coding"; class_code "j"; transcript_id "TCONS_00024346"; gene_name "Lcor"; transcript_biotype "others"
NC_000085.7	Novogene	exon	43516793	43516981	.	+	.	nearest_ref "XR_386723.4"; exon_number "1"; gene_id "102637951"; transcript_name "TCONS_00024362"; gene_biotype "lncRNA"; class_code "x"; transcript_id "TCONS_00024362"; gene_name "Gm34636"; transcript_biotype "antisense"
NC_000085.7	Novogene	exon	43552676	43553774	.	+	.	nearest_ref "XR_386723.4"; exon_number "2"; gene_id "102637951"; transcript_name "TCONS_00024362"; gene_biotype "lncRNA"; class_code "x"; transcript_id "TCONS_00024362"; gene_name "Gm34636"; transcript_biotype "antisense"
NC_000085.7	Novogene	exon	58807219	58807496	.	+	.	nearest_ref "NM_001327998.1"; exon_number "1"; gene_id "73442"; transcript_name "TCONS_00024467"; gene_biotype "protein_coding"; class_code "x"; transcript_id "TCONS_00024467"; gene_name "Hspa12a"; transcript_biotype "antisense"
NC_000085.7	Novogene	exon	58810089	58810371	.	+	.	nearest_ref "NM_001327998.1"; exon_number "2"; gene_id "73442"; transcript_name "TCONS_00024467"; gene_biotype "protein_coding"; class_code "x"; transcript_id "TCONS_00024467"; gene_name "Hspa12a"; transcript_biotype "antisense"
NC_000085.7	Novogene	exon	3607056	3619323	.	-	.	nearest_ref "XR_001782603.3"; exon_number "1"; gene_id "52036"; transcript_name "TCONS_00024484"; gene_biotype "protein_coding"; class_code "i"; transcript_id "TCONS_00024484"; gene_name "Ppp6r3"; transcript_biotype "sense_intronic"
NC_000085.7	Novogene	exon	3620550	3625557	.	-	.	nearest_ref "XR_001782603.3"; exon_number "2"; gene_id "52036"; transcript_name "TCONS_00024484"; gene_biotype "protein_coding"; class_code "i"; transcript_id "TCONS_00024484"; gene_name "Ppp6r3"; transcript_biotype "sense_intronic"
NC_000085.7	Novogene	exon	5843834	5846056	.	-	.	nearest_ref "NR_131212.1"; exon_number "1"; gene_id "66961"; transcript_name "TCONS_00024565"; gene_biotype "lncRNA"; class_code "o"; transcript_id "TCONS_00024565"; gene_name "Neat1"; transcript_biotype "sense_overlapping"
NC_000085.7	Novogene	exon	5846097	5850636	.	-	.	nearest_ref "NR_131212.1"; exon_number "2"; gene_id "66961"; transcript_name "TCONS_00024565"; gene_biotype "lncRNA"; class_code "o"; transcript_id "TCONS_00024565"; gene_name "Neat1"; transcript_biotype "sense_overlapping"
NC_000085.7	Novogene	exon	5892458	5894462	.	-	.	nearest_ref "NR_131212.1"; exon_number "3"; gene_id "66961"; transcript_name "TCONS_00024565"; gene_biotype "lncRNA"; class_code "o"; transcript_id "TCONS_00024565"; gene_name "Neat1"; transcript_biotype "sense_overlapping"
NC_000085.7	Novogene	exon	5894606	5895506	.	-	.	nearest_ref "NR_131212.1"; exon_number "4"; gene_id "66961"; transcript_name "TCONS_00024565"; gene_biotype "lncRNA"; class_code "o"; transcript_id "TCONS_00024565"; gene_name "Neat1"; transcript_biotype "sense_overlapping"
NC_000085.7	Novogene	exon	5846110	5847748	.	-	.	nearest_ref "NR_002847.3"; exon_number "1"; gene_id "72289"; transcript_name "TCONS_00024567"; gene_biotype "lncRNA"; class_code "o"; transcript_id "TCONS_00024567"; gene_name "Malat1"; transcript_biotype "sense_overlapping"
NC_000085.7	Novogene	exon	5847847	5852691	.	-	.	nearest_ref "NR_002847.3"; exon_number "2"; gene_id "72289"; transcript_name "TCONS_00024567"; gene_biotype "lncRNA"; class_code "o"; transcript_id "TCONS_00024567"; gene_name "Malat1"; transcript_biotype "sense_overlapping"
NC_000085.7	Novogene	exon	7282156	7286819	.	-	.	nearest_ref "XM_006526643.3"; exon_number "1"; gene_id "13728"; transcript_name "TCONS_00024614"; gene_biotype "protein_coding"; class_code "i"; transcript_id "TCONS_00024614"; gene_name "Mark2"; transcript_biotype "sense_intronic"
NC_000085.7	Novogene	exon	7305031	7318121	.	-	.	nearest_ref "XM_006526643.3"; exon_number "2"; gene_id "13728"; transcript_name "TCONS_00024614"; gene_biotype "protein_coding"; class_code "i"; transcript_id "TCONS_00024614"; gene_name "Mark2"; transcript_biotype "sense_intronic"
NC_000085.7	Novogene	exon	7291772	7310461	.	-	.	nearest_ref "XM_006526643.3"; exon_number "1"; gene_id "13728"; transcript_name "TCONS_00024615"; gene_biotype "protein_coding"; class_code "i"; transcript_id "TCONS_00024615"; gene_name "Mark2"; transcript_biotype "sense_intronic"
NC_000085.7	Novogene	exon	7317000	7317944	.	-	.	nearest_ref "XM_006526643.3"; exon_number "2"; gene_id "13728"; transcript_name "TCONS_00024615"; gene_biotype "protein_coding"; class_code "i"; transcript_id "TCONS_00024615"; gene_name "Mark2"; transcript_biotype "sense_intronic"
NC_000085.7	Novogene	exon	9803935	9806406	.	-	.	exon_number "1"; gene_id "XLOC_014610"; transcript_name "TCONS_00024637"; gene_biotype "novel"; class_code "u"; transcript_id "TCONS_00024637"; gene_name "XLOC_014610"; transcript_biotype "lincRNA"
NC_000085.7	Novogene	exon	9814398	9814529	.	-	.	exon_number "2"; gene_id "XLOC_014610"; transcript_name "TCONS_00024637"; gene_biotype "novel"; class_code "u"; transcript_id "TCONS_00024637"; gene_name "XLOC_014610"; transcript_biotype "lincRNA"
NC_000085.7	Novogene	exon	9806262	9806492	.	-	.	exon_number "1"; gene_id "XLOC_014610"; transcript_name "TCONS_00024638"; gene_biotype "novel"; class_code "u"; transcript_id "TCONS_00024638"; gene_name "XLOC_014610"; transcript_biotype "lincRNA"
NC_000085.7	Novogene	exon	9814484	9814528	.	-	.	exon_number "2"; gene_id "XLOC_014610"; transcript_name "TCONS_00024638"; gene_biotype "novel"; class_code "u"; transcript_id "TCONS_00024638"; gene_name "XLOC_014610"; transcript_biotype "lincRNA"
NC_000085.7	Novogene	exon	32147930	32152645	.	-	.	nearest_ref "XR_004940128.1"; exon_number "1"; gene_id "208449"; transcript_name "TCONS_00024722"; gene_biotype "protein_coding"; class_code "i"; transcript_id "TCONS_00024722"; gene_name "Sgms1"; transcript_biotype "sense_intronic"
NC_000085.7	Novogene	exon	32154907	32162838	.	-	.	nearest_ref "XR_004940128.1"; exon_number "2"; gene_id "208449"; transcript_name "TCONS_00024722"; gene_biotype "protein_coding"; class_code "i"; transcript_id "TCONS_00024722"; gene_name "Sgms1"; transcript_biotype "sense_intronic"
NC_000085.7	Novogene	exon	36192029	36195343	.	-	.	nearest_ref "XR_386674.3"; exon_number "1"; gene_id "102634446"; transcript_name "TCONS_00024742"; gene_biotype "lncRNA"; class_code "j"; transcript_id "TCONS_00024742"; gene_name "Gm32027"; transcript_biotype "lincRNA"
NC_000085.7	Novogene	exon	36196524	36196572	.	-	.	nearest_ref "XR_386674.3"; exon_number "2"; gene_id "102634446"; transcript_name "TCONS_00024742"; gene_biotype "lncRNA"; class_code "j"; transcript_id "TCONS_00024742"; gene_name "Gm32027"; transcript_biotype "lincRNA"
NC_000085.7	Novogene	exon	36219592	36219644	.	-	.	nearest_ref "XR_386674.3"; exon_number "3"; gene_id "102634446"; transcript_name "TCONS_00024742"; gene_biotype "lncRNA"; class_code "j"; transcript_id "TCONS_00024742"; gene_name "Gm32027"; transcript_biotype "lincRNA"
NC_000085.7	Novogene	exon	36228577	36241593	.	-	.	nearest_ref "XR_386674.3"; exon_number "4"; gene_id "102634446"; transcript_name "TCONS_00024742"; gene_biotype "lncRNA"; class_code "j"; transcript_id "TCONS_00024742"; gene_name "Gm32027"; transcript_biotype "lincRNA"
NC_000085.7	Novogene	exon	36593131	36598892	.	-	.	nearest_ref "NR_033510.1"; exon_number "1"; gene_id "668215"; transcript_name "TCONS_00024746"; gene_biotype "lncRNA"; class_code "j"; transcript_id "TCONS_00024746"; gene_name "Hectd2os"; transcript_biotype "lincRNA"
NC_000085.7	Novogene	exon	36602623	36602745	.	-	.	nearest_ref "NR_033510.1"; exon_number "2"; gene_id "668215"; transcript_name "TCONS_00024746"; gene_biotype "lncRNA"; class_code "j"; transcript_id "TCONS_00024746"; gene_name "Hectd2os"; transcript_biotype "lincRNA"
NC_000085.7	Novogene	exon	36623084	36623165	.	-	.	nearest_ref "NR_033510.1"; exon_number "3"; gene_id "668215"; transcript_name "TCONS_00024746"; gene_biotype "lncRNA"; class_code "j"; transcript_id "TCONS_00024746"; gene_name "Hectd2os"; transcript_biotype "lincRNA"
NC_000085.7	Novogene	exon	36635828	36636074	.	-	.	nearest_ref "NR_033510.1"; exon_number "4"; gene_id "668215"; transcript_name "TCONS_00024746"; gene_biotype "lncRNA"; class_code "j"; transcript_id "TCONS_00024746"; gene_name "Hectd2os"; transcript_biotype "lincRNA"
NC_000085.7	Novogene	exon	36662927	36663067	.	-	.	nearest_ref "NR_033510.1"; exon_number "5"; gene_id "668215"; transcript_name "TCONS_00024746"; gene_biotype "lncRNA"; class_code "j"; transcript_id "TCONS_00024746"; gene_name "Hectd2os"; transcript_biotype "lincRNA"
NC_000085.7	Novogene	exon	36666639	36666788	.	-	.	nearest_ref "NR_033510.1"; exon_number "6"; gene_id "668215"; transcript_name "TCONS_00024746"; gene_biotype "lncRNA"; class_code "j"; transcript_id "TCONS_00024746"; gene_name "Hectd2os"; transcript_biotype "lincRNA"
NC_000085.7	Novogene	exon	36596771	36598892	.	-	.	nearest_ref "NR_033510.1"; exon_number "1"; gene_id "668215"; transcript_name "TCONS_00024747"; gene_biotype "lncRNA"; class_code "j"; transcript_id "TCONS_00024747"; gene_name "Hectd2os"; transcript_biotype "lincRNA"
NC_000085.7	Novogene	exon	36602623	36602745	.	-	.	nearest_ref "NR_033510.1"; exon_number "2"; gene_id "668215"; transcript_name "TCONS_00024747"; gene_biotype "lncRNA"; class_code "j"; transcript_id "TCONS_00024747"; gene_name "Hectd2os"; transcript_biotype "lincRNA"
NC_000085.7	Novogene	exon	36623084	36623165	.	-	.	nearest_ref "NR_033510.1"; exon_number "3"; gene_id "668215"; transcript_name "TCONS_00024747"; gene_biotype "lncRNA"; class_code "j"; transcript_id "TCONS_00024747"; gene_name "Hectd2os"; transcript_biotype "lincRNA"
NC_000085.7	Novogene	exon	36635828	36635966	.	-	.	nearest_ref "NR_033510.1"; exon_number "4"; gene_id "668215"; transcript_name "TCONS_00024747"; gene_biotype "lncRNA"; class_code "j"; transcript_id "TCONS_00024747"; gene_name "Hectd2os"; transcript_biotype "lincRNA"
NC_000085.7	Novogene	exon	36662927	36663067	.	-	.	nearest_ref "NR_033510.1"; exon_number "5"; gene_id "668215"; transcript_name "TCONS_00024747"; gene_biotype "lncRNA"; class_code "j"; transcript_id "TCONS_00024747"; gene_name "Hectd2os"; transcript_biotype "lincRNA"
NC_000085.7	Novogene	exon	36666639	36666785	.	-	.	nearest_ref "NR_033510.1"; exon_number "6"; gene_id "668215"; transcript_name "TCONS_00024747"; gene_biotype "lncRNA"; class_code "j"; transcript_id "TCONS_00024747"; gene_name "Hectd2os"; transcript_biotype "lincRNA"
NC_000085.7	Novogene	exon	36596818	36598892	.	-	.	nearest_ref "NR_033510.1"; exon_number "1"; gene_id "668215"; transcript_name "TCONS_00024748"; gene_biotype "lncRNA"; class_code "j"; transcript_id "TCONS_00024748"; gene_name "Hectd2os"; transcript_biotype "lincRNA"
NC_000085.7	Novogene	exon	36602623	36602745	.	-	.	nearest_ref "NR_033510.1"; exon_number "2"; gene_id "668215"; transcript_name "TCONS_00024748"; gene_biotype "lncRNA"; class_code "j"; transcript_id "TCONS_00024748"; gene_name "Hectd2os"; transcript_biotype "lincRNA"
NC_000085.7	Novogene	exon	36623084	36623165	.	-	.	nearest_ref "NR_033510.1"; exon_number "3"; gene_id "668215"; transcript_name "TCONS_00024748"; gene_biotype "lncRNA"; class_code "j"; transcript_id "TCONS_00024748"; gene_name "Hectd2os"; transcript_biotype "lincRNA"
NC_000085.7	Novogene	exon	36635828	36635966	.	-	.	nearest_ref "NR_033510.1"; exon_number "4"; gene_id "668215"; transcript_name "TCONS_00024748"; gene_biotype "lncRNA"; class_code "j"; transcript_id "TCONS_00024748"; gene_name "Hectd2os"; transcript_biotype "lincRNA"
NC_000085.7	Novogene	exon	36653232	36653282	.	-	.	nearest_ref "NR_033510.1"; exon_number "5"; gene_id "668215"; transcript_name "TCONS_00024748"; gene_biotype "lncRNA"; class_code "j"; transcript_id "TCONS_00024748"; gene_name "Hectd2os"; transcript_biotype "lincRNA"
NC_000085.7	Novogene	exon	36654141	36654199	.	-	.	nearest_ref "NR_033510.1"; exon_number "6"; gene_id "668215"; transcript_name "TCONS_00024748"; gene_biotype "lncRNA"; class_code "j"; transcript_id "TCONS_00024748"; gene_name "Hectd2os"; transcript_biotype "lincRNA"
NC_000085.7	Novogene	exon	36662927	36663067	.	-	.	nearest_ref "NR_033510.1"; exon_number "7"; gene_id "668215"; transcript_name "TCONS_00024748"; gene_biotype "lncRNA"; class_code "j"; transcript_id "TCONS_00024748"; gene_name "Hectd2os"; transcript_biotype "lincRNA"
NC_000085.7	Novogene	exon	36666639	36666808	.	-	.	nearest_ref "NR_033510.1"; exon_number "8"; gene_id "668215"; transcript_name "TCONS_00024748"; gene_biotype "lncRNA"; class_code "j"; transcript_id "TCONS_00024748"; gene_name "Hectd2os"; transcript_biotype "lincRNA"
NC_000085.7	Novogene	exon	43224477	43224733	.	-	.	nearest_ref "NM_001081257.2"; exon_number "1"; gene_id "545291"; transcript_name "TCONS_00024823"; gene_biotype "protein_coding"; class_code "i"; transcript_id "TCONS_00024823"; gene_name "Hpse2"; transcript_biotype "sense_intronic"
NC_000085.7	Novogene	exon	43226209	43226349	.	-	.	nearest_ref "NM_001081257.2"; exon_number "2"; gene_id "545291"; transcript_name "TCONS_00024823"; gene_biotype "protein_coding"; class_code "i"; transcript_id "TCONS_00024823"; gene_name "Hpse2"; transcript_biotype "sense_intronic"
NC_000085.7	Novogene	exon	56718912	56719374	.	-	.	nearest_ref "XR_877950.3"; exon_number "1"; gene_id "102635359"; transcript_name "TCONS_00024901"; gene_biotype "lncRNA"; class_code "x"; transcript_id "TCONS_00024901"; gene_name "Gm32718"; transcript_biotype "antisense"
NC_000085.7	Novogene	exon	56727334	56730084	.	-	.	nearest_ref "XR_877950.3"; exon_number "2"; gene_id "102635359"; transcript_name "TCONS_00024901"; gene_biotype "lncRNA"; class_code "x"; transcript_id "TCONS_00024901"; gene_name "Gm32718"; transcript_biotype "antisense"
NC_000085.7	Novogene	exon	56734891	56737492	.	-	.	nearest_ref "XR_877950.3"; exon_number "3"; gene_id "102635359"; transcript_name "TCONS_00024901"; gene_biotype "lncRNA"; class_code "x"; transcript_id "TCONS_00024901"; gene_name "Gm32718"; transcript_biotype "antisense"
NC_000086.8	Novogene	exon	83044474	83044635	.	+	.	nearest_ref "NM_007868.6"; exon_number "1"; gene_id "13405"; transcript_name "TCONS_00025138"; gene_biotype "protein_coding"; class_code "o"; transcript_id "TCONS_00025138"; gene_name "Dmd"; transcript_biotype "sense_overlapping"
NC_000086.8	Novogene	exon	83123835	83126409	.	+	.	nearest_ref "NM_007868.6"; exon_number "2"; gene_id "13405"; transcript_name "TCONS_00025138"; gene_biotype "protein_coding"; class_code "o"; transcript_id "TCONS_00025138"; gene_name "Dmd"; transcript_biotype "sense_overlapping"
NC_000086.8	Novogene	exon	93921564	93923051	.	+	.	exon_number "1"; gene_id "XLOC_014896"; transcript_name "TCONS_00025147"; gene_biotype "novel"; class_code "u"; transcript_id "TCONS_00025147"; gene_name "XLOC_014896"; transcript_biotype "lincRNA"
NC_000086.8	Novogene	exon	93927143	93927477	.	+	.	exon_number "2"; gene_id "XLOC_014896"; transcript_name "TCONS_00025147"; gene_biotype "novel"; class_code "u"; transcript_id "TCONS_00025147"; gene_name "XLOC_014896"; transcript_biotype "lincRNA"
NC_000086.8	Novogene	exon	93954899	93955202	.	+	.	exon_number "1"; gene_id "XLOC_014897"; transcript_name "TCONS_00025148"; gene_biotype "novel"; class_code "u"; transcript_id "TCONS_00025148"; gene_name "XLOC_014897"; transcript_biotype "lincRNA"
NC_000086.8	Novogene	exon	93961392	93961488	.	+	.	exon_number "2"; gene_id "XLOC_014897"; transcript_name "TCONS_00025148"; gene_biotype "novel"; class_code "u"; transcript_id "TCONS_00025148"; gene_name "XLOC_014897"; transcript_biotype "lincRNA"
NC_000086.8	Novogene	exon	95283549	95283602	.	+	.	nearest_ref "NR_030718.1"; exon_number "1"; gene_id "100038363"; transcript_name "TCONS_00025150"; gene_biotype "lncRNA"; class_code "j"; transcript_id "TCONS_00025150"; gene_name "F630028O10Rik"; transcript_biotype "lincRNA"
NC_000086.8	Novogene	exon	95284019	95286470	.	+	.	nearest_ref "NR_030718.1"; exon_number "2"; gene_id "100038363"; transcript_name "TCONS_00025150"; gene_biotype "lncRNA"; class_code "j"; transcript_id "TCONS_00025150"; gene_name "F630028O10Rik"; transcript_biotype "lincRNA"
NC_000086.8	Novogene	exon	150955479	150962086	.	+	.	nearest_ref "XM_006528842.1"; exon_number "1"; gene_id "245666"; transcript_name "TCONS_00025267"; gene_biotype "protein_coding"; class_code "j"; transcript_id "TCONS_00025267"; gene_name "Iqsec2"; transcript_biotype "others"
NC_000086.8	Novogene	exon	150963993	150964088	.	+	.	nearest_ref "XM_006528842.1"; exon_number "2"; gene_id "245666"; transcript_name "TCONS_00025267"; gene_biotype "protein_coding"; class_code "j"; transcript_id "TCONS_00025267"; gene_name "Iqsec2"; transcript_biotype "others"
NC_000086.8	Novogene	exon	150976862	150984455	.	+	.	nearest_ref "XM_006528842.1"; exon_number "3"; gene_id "245666"; transcript_name "TCONS_00025267"; gene_biotype "protein_coding"; class_code "j"; transcript_id "TCONS_00025267"; gene_name "Iqsec2"; transcript_biotype "others"
NC_000086.8	Novogene	exon	19013208	19025168	.	-	.	nearest_ref "NR_168020.1"; exon_number "1"; gene_id "100503338"; transcript_name "TCONS_00025373"; gene_biotype "lncRNA"; class_code "j"; transcript_id "TCONS_00025373"; gene_name "Gm14636"; transcript_biotype "lincRNA"
NC_000086.8	Novogene	exon	19033014	19033181	.	-	.	nearest_ref "NR_168020.1"; exon_number "2"; gene_id "100503338"; transcript_name "TCONS_00025373"; gene_biotype "lncRNA"; class_code "j"; transcript_id "TCONS_00025373"; gene_name "Gm14636"; transcript_biotype "lincRNA"
NC_000086.8	Novogene	exon	19033310	19033456	.	-	.	nearest_ref "NR_168020.1"; exon_number "3"; gene_id "100503338"; transcript_name "TCONS_00025373"; gene_biotype "lncRNA"; class_code "j"; transcript_id "TCONS_00025373"; gene_name "Gm14636"; transcript_biotype "lincRNA"
NC_000086.8	Novogene	exon	49644630	49644806	.	-	.	nearest_ref "NR_015505.2"; exon_number "1"; gene_id "103012"; transcript_name "TCONS_00025411"; gene_biotype "lncRNA"; class_code "j"; transcript_id "TCONS_00025411"; gene_name "Firre"; transcript_biotype "lincRNA"
NC_000086.8	Novogene	exon	49647108	49647261	.	-	.	nearest_ref "NR_015505.2"; exon_number "2"; gene_id "103012"; transcript_name "TCONS_00025411"; gene_biotype "lncRNA"; class_code "j"; transcript_id "TCONS_00025411"; gene_name "Firre"; transcript_biotype "lincRNA"
NC_000086.8	Novogene	exon	49649686	49649883	.	-	.	nearest_ref "NR_015505.2"; exon_number "3"; gene_id "103012"; transcript_name "TCONS_00025411"; gene_biotype "lncRNA"; class_code "j"; transcript_id "TCONS_00025411"; gene_name "Firre"; transcript_biotype "lincRNA"
NC_000086.8	Novogene	exon	49651557	49653844	.	-	.	nearest_ref "NR_015505.2"; exon_number "4"; gene_id "103012"; transcript_name "TCONS_00025411"; gene_biotype "lncRNA"; class_code "j"; transcript_id "TCONS_00025411"; gene_name "Firre"; transcript_biotype "lincRNA"
NC_000086.8	Novogene	exon	49656417	49656570	.	-	.	nearest_ref "NR_015505.2"; exon_number "5"; gene_id "103012"; transcript_name "TCONS_00025411"; gene_biotype "lncRNA"; class_code "j"; transcript_id "TCONS_00025411"; gene_name "Firre"; transcript_biotype "lincRNA"
NC_000086.8	Novogene	exon	49658154	49659168	.	-	.	nearest_ref "NR_015505.2"; exon_number "6"; gene_id "103012"; transcript_name "TCONS_00025411"; gene_biotype "lncRNA"; class_code "j"; transcript_id "TCONS_00025411"; gene_name "Firre"; transcript_biotype "lincRNA"
NC_000086.8	Novogene	exon	49661892	49662021	.	-	.	nearest_ref "NR_015505.2"; exon_number "7"; gene_id "103012"; transcript_name "TCONS_00025411"; gene_biotype "lncRNA"; class_code "j"; transcript_id "TCONS_00025411"; gene_name "Firre"; transcript_biotype "lincRNA"
NC_000086.8	Novogene	exon	49662101	49662228	.	-	.	nearest_ref "NR_015505.2"; exon_number "8"; gene_id "103012"; transcript_name "TCONS_00025411"; gene_biotype "lncRNA"; class_code "j"; transcript_id "TCONS_00025411"; gene_name "Firre"; transcript_biotype "lincRNA"
NC_000086.8	Novogene	exon	49666748	49666901	.	-	.	nearest_ref "NR_015505.2"; exon_number "9"; gene_id "103012"; transcript_name "TCONS_00025411"; gene_biotype "lncRNA"; class_code "j"; transcript_id "TCONS_00025411"; gene_name "Firre"; transcript_biotype "lincRNA"
NC_000086.8	Novogene	exon	49669458	49669826	.	-	.	nearest_ref "NR_015505.2"; exon_number "10"; gene_id "103012"; transcript_name "TCONS_00025411"; gene_biotype "lncRNA"; class_code "j"; transcript_id "TCONS_00025411"; gene_name "Firre"; transcript_biotype "lincRNA"
NC_000086.8	Novogene	exon	49670280	49670433	.	-	.	nearest_ref "NR_015505.2"; exon_number "11"; gene_id "103012"; transcript_name "TCONS_00025411"; gene_biotype "lncRNA"; class_code "j"; transcript_id "TCONS_00025411"; gene_name "Firre"; transcript_biotype "lincRNA"
NC_000086.8	Novogene	exon	49673556	49673724	.	-	.	nearest_ref "NR_015505.2"; exon_number "12"; gene_id "103012"; transcript_name "TCONS_00025411"; gene_biotype "lncRNA"; class_code "j"; transcript_id "TCONS_00025411"; gene_name "Firre"; transcript_biotype "lincRNA"
NC_000086.8	Novogene	exon	49680802	49680962	.	-	.	nearest_ref "NR_015505.2"; exon_number "13"; gene_id "103012"; transcript_name "TCONS_00025411"; gene_biotype "lncRNA"; class_code "j"; transcript_id "TCONS_00025411"; gene_name "Firre"; transcript_biotype "lincRNA"
NC_000086.8	Novogene	exon	49684338	49684492	.	-	.	nearest_ref "NR_015505.2"; exon_number "14"; gene_id "103012"; transcript_name "TCONS_00025411"; gene_biotype "lncRNA"; class_code "j"; transcript_id "TCONS_00025411"; gene_name "Firre"; transcript_biotype "lincRNA"
NC_000086.8	Novogene	exon	49687011	49687165	.	-	.	nearest_ref "NR_015505.2"; exon_number "15"; gene_id "103012"; transcript_name "TCONS_00025411"; gene_biotype "lncRNA"; class_code "j"; transcript_id "TCONS_00025411"; gene_name "Firre"; transcript_biotype "lincRNA"
NC_000086.8	Novogene	exon	49689621	49689775	.	-	.	nearest_ref "NR_015505.2"; exon_number "16"; gene_id "103012"; transcript_name "TCONS_00025411"; gene_biotype "lncRNA"; class_code "j"; transcript_id "TCONS_00025411"; gene_name "Firre"; transcript_biotype "lincRNA"
NC_000086.8	Novogene	exon	49692316	49692402	.	-	.	nearest_ref "NR_015505.2"; exon_number "17"; gene_id "103012"; transcript_name "TCONS_00025411"; gene_biotype "lncRNA"; class_code "j"; transcript_id "TCONS_00025411"; gene_name "Firre"; transcript_biotype "lincRNA"
NC_000086.8	Novogene	exon	49697564	49697691	.	-	.	nearest_ref "NR_015505.2"; exon_number "18"; gene_id "103012"; transcript_name "TCONS_00025411"; gene_biotype "lncRNA"; class_code "j"; transcript_id "TCONS_00025411"; gene_name "Firre"; transcript_biotype "lincRNA"
NC_000086.8	Novogene	exon	49701582	49701727	.	-	.	nearest_ref "NR_015505.2"; exon_number "19"; gene_id "103012"; transcript_name "TCONS_00025411"; gene_biotype "lncRNA"; class_code "j"; transcript_id "TCONS_00025411"; gene_name "Firre"; transcript_biotype "lincRNA"
NC_000086.8	Novogene	exon	49704238	49704392	.	-	.	nearest_ref "NR_015505.2"; exon_number "20"; gene_id "103012"; transcript_name "TCONS_00025411"; gene_biotype "lncRNA"; class_code "j"; transcript_id "TCONS_00025411"; gene_name "Firre"; transcript_biotype "lincRNA"
NC_000086.8	Novogene	exon	49715314	49715386	.	-	.	nearest_ref "NR_015505.2"; exon_number "21"; gene_id "103012"; transcript_name "TCONS_00025411"; gene_biotype "lncRNA"; class_code "j"; transcript_id "TCONS_00025411"; gene_name "Firre"; transcript_biotype "lincRNA"
NC_000086.8	Novogene	exon	49716084	49716186	.	-	.	nearest_ref "NR_015505.2"; exon_number "22"; gene_id "103012"; transcript_name "TCONS_00025411"; gene_biotype "lncRNA"; class_code "j"; transcript_id "TCONS_00025411"; gene_name "Firre"; transcript_biotype "lincRNA"
NC_000086.8	Novogene	exon	49719768	49719872	.	-	.	nearest_ref "NR_015505.2"; exon_number "23"; gene_id "103012"; transcript_name "TCONS_00025411"; gene_biotype "lncRNA"; class_code "j"; transcript_id "TCONS_00025411"; gene_name "Firre"; transcript_biotype "lincRNA"
NC_000086.8	Novogene	exon	49723822	49724216	.	-	.	nearest_ref "NR_015505.2"; exon_number "24"; gene_id "103012"; transcript_name "TCONS_00025411"; gene_biotype "lncRNA"; class_code "j"; transcript_id "TCONS_00025411"; gene_name "Firre"; transcript_biotype "lincRNA"
NC_000086.8	Novogene	exon	49651997	49653844	.	-	.	nearest_ref "NR_015505.2"; exon_number "1"; gene_id "103012"; transcript_name "TCONS_00025412"; gene_biotype "lncRNA"; class_code "j"; transcript_id "TCONS_00025412"; gene_name "Firre"; transcript_biotype "lincRNA"
NC_000086.8	Novogene	exon	49656417	49656570	.	-	.	nearest_ref "NR_015505.2"; exon_number "2"; gene_id "103012"; transcript_name "TCONS_00025412"; gene_biotype "lncRNA"; class_code "j"; transcript_id "TCONS_00025412"; gene_name "Firre"; transcript_biotype "lincRNA"
NC_000086.8	Novogene	exon	49658154	49659168	.	-	.	nearest_ref "NR_015505.2"; exon_number "3"; gene_id "103012"; transcript_name "TCONS_00025412"; gene_biotype "lncRNA"; class_code "j"; transcript_id "TCONS_00025412"; gene_name "Firre"; transcript_biotype "lincRNA"
NC_000086.8	Novogene	exon	49661892	49662021	.	-	.	nearest_ref "NR_015505.2"; exon_number "4"; gene_id "103012"; transcript_name "TCONS_00025412"; gene_biotype "lncRNA"; class_code "j"; transcript_id "TCONS_00025412"; gene_name "Firre"; transcript_biotype "lincRNA"
NC_000086.8	Novogene	exon	49662101	49662228	.	-	.	nearest_ref "NR_015505.2"; exon_number "5"; gene_id "103012"; transcript_name "TCONS_00025412"; gene_biotype "lncRNA"; class_code "j"; transcript_id "TCONS_00025412"; gene_name "Firre"; transcript_biotype "lincRNA"
NC_000086.8	Novogene	exon	49666748	49666901	.	-	.	nearest_ref "NR_015505.2"; exon_number "6"; gene_id "103012"; transcript_name "TCONS_00025412"; gene_biotype "lncRNA"; class_code "j"; transcript_id "TCONS_00025412"; gene_name "Firre"; transcript_biotype "lincRNA"
NC_000086.8	Novogene	exon	49669458	49669826	.	-	.	nearest_ref "NR_015505.2"; exon_number "7"; gene_id "103012"; transcript_name "TCONS_00025412"; gene_biotype "lncRNA"; class_code "j"; transcript_id "TCONS_00025412"; gene_name "Firre"; transcript_biotype "lincRNA"
NC_000086.8	Novogene	exon	49670280	49670433	.	-	.	nearest_ref "NR_015505.2"; exon_number "8"; gene_id "103012"; transcript_name "TCONS_00025412"; gene_biotype "lncRNA"; class_code "j"; transcript_id "TCONS_00025412"; gene_name "Firre"; transcript_biotype "lincRNA"
NC_000086.8	Novogene	exon	49673556	49673724	.	-	.	nearest_ref "NR_015505.2"; exon_number "9"; gene_id "103012"; transcript_name "TCONS_00025412"; gene_biotype "lncRNA"; class_code "j"; transcript_id "TCONS_00025412"; gene_name "Firre"; transcript_biotype "lincRNA"
NC_000086.8	Novogene	exon	49680802	49680962	.	-	.	nearest_ref "NR_015505.2"; exon_number "10"; gene_id "103012"; transcript_name "TCONS_00025412"; gene_biotype "lncRNA"; class_code "j"; transcript_id "TCONS_00025412"; gene_name "Firre"; transcript_biotype "lincRNA"
NC_000086.8	Novogene	exon	49684338	49684492	.	-	.	nearest_ref "NR_015505.2"; exon_number "11"; gene_id "103012"; transcript_name "TCONS_00025412"; gene_biotype "lncRNA"; class_code "j"; transcript_id "TCONS_00025412"; gene_name "Firre"; transcript_biotype "lincRNA"
NC_000086.8	Novogene	exon	49687011	49687165	.	-	.	nearest_ref "NR_015505.2"; exon_number "12"; gene_id "103012"; transcript_name "TCONS_00025412"; gene_biotype "lncRNA"; class_code "j"; transcript_id "TCONS_00025412"; gene_name "Firre"; transcript_biotype "lincRNA"
NC_000086.8	Novogene	exon	49689621	49689775	.	-	.	nearest_ref "NR_015505.2"; exon_number "13"; gene_id "103012"; transcript_name "TCONS_00025412"; gene_biotype "lncRNA"; class_code "j"; transcript_id "TCONS_00025412"; gene_name "Firre"; transcript_biotype "lincRNA"
NC_000086.8	Novogene	exon	49692316	49692402	.	-	.	nearest_ref "NR_015505.2"; exon_number "14"; gene_id "103012"; transcript_name "TCONS_00025412"; gene_biotype "lncRNA"; class_code "j"; transcript_id "TCONS_00025412"; gene_name "Firre"; transcript_biotype "lincRNA"
NC_000086.8	Novogene	exon	49694953	49695039	.	-	.	nearest_ref "NR_015505.2"; exon_number "15"; gene_id "103012"; transcript_name "TCONS_00025412"; gene_biotype "lncRNA"; class_code "j"; transcript_id "TCONS_00025412"; gene_name "Firre"; transcript_biotype "lincRNA"
NC_000086.8	Novogene	exon	49697355	49697484	.	-	.	nearest_ref "NR_015505.2"; exon_number "16"; gene_id "103012"; transcript_name "TCONS_00025412"; gene_biotype "lncRNA"; class_code "j"; transcript_id "TCONS_00025412"; gene_name "Firre"; transcript_biotype "lincRNA"
NC_000086.8	Novogene	exon	49697564	49697691	.	-	.	nearest_ref "NR_015505.2"; exon_number "17"; gene_id "103012"; transcript_name "TCONS_00025412"; gene_biotype "lncRNA"; class_code "j"; transcript_id "TCONS_00025412"; gene_name "Firre"; transcript_biotype "lincRNA"
NC_000086.8	Novogene	exon	49701582	49701727	.	-	.	nearest_ref "NR_015505.2"; exon_number "18"; gene_id "103012"; transcript_name "TCONS_00025412"; gene_biotype "lncRNA"; class_code "j"; transcript_id "TCONS_00025412"; gene_name "Firre"; transcript_biotype "lincRNA"
NC_000086.8	Novogene	exon	49704238	49704392	.	-	.	nearest_ref "NR_015505.2"; exon_number "19"; gene_id "103012"; transcript_name "TCONS_00025412"; gene_biotype "lncRNA"; class_code "j"; transcript_id "TCONS_00025412"; gene_name "Firre"; transcript_biotype "lincRNA"
NC_000086.8	Novogene	exon	49715314	49715386	.	-	.	nearest_ref "NR_015505.2"; exon_number "20"; gene_id "103012"; transcript_name "TCONS_00025412"; gene_biotype "lncRNA"; class_code "j"; transcript_id "TCONS_00025412"; gene_name "Firre"; transcript_biotype "lincRNA"
NC_000086.8	Novogene	exon	49716084	49716186	.	-	.	nearest_ref "NR_015505.2"; exon_number "21"; gene_id "103012"; transcript_name "TCONS_00025412"; gene_biotype "lncRNA"; class_code "j"; transcript_id "TCONS_00025412"; gene_name "Firre"; transcript_biotype "lincRNA"
NC_000086.8	Novogene	exon	49719768	49719872	.	-	.	nearest_ref "NR_015505.2"; exon_number "22"; gene_id "103012"; transcript_name "TCONS_00025412"; gene_biotype "lncRNA"; class_code "j"; transcript_id "TCONS_00025412"; gene_name "Firre"; transcript_biotype "lincRNA"
NC_000086.8	Novogene	exon	49723822	49724198	.	-	.	nearest_ref "NR_015505.2"; exon_number "23"; gene_id "103012"; transcript_name "TCONS_00025412"; gene_biotype "lncRNA"; class_code "j"; transcript_id "TCONS_00025412"; gene_name "Firre"; transcript_biotype "lincRNA"
NC_000086.8	Novogene	exon	161602072	161607196	.	-	.	nearest_ref "NM_001290776.1"; exon_number "1"; gene_id "353170"; transcript_name "TCONS_00025681"; gene_biotype "protein_coding"; class_code "i"; transcript_id "TCONS_00025681"; gene_name "Txlng"; transcript_biotype "sense_intronic"
NC_000086.8	Novogene	exon	161607524	161611785	.	-	.	nearest_ref "NM_001290776.1"; exon_number "2"; gene_id "353170"; transcript_name "TCONS_00025681"; gene_biotype "protein_coding"; class_code "i"; transcript_id "TCONS_00025681"; gene_name "Txlng"; transcript_biotype "sense_intronic"
NC_000087.8	Novogene	exon	90795439	90795675	.	+	.	nearest_ref "XR_001782921.2"; exon_number "1"; gene_id "102636107"; transcript_name "TCONS_00025711"; gene_biotype "lncRNA"; class_code "o"; transcript_id "TCONS_00025711"; gene_name "Gm33272"; transcript_biotype "sense_overlapping"
NC_000087.8	Novogene	exon	90795778	90795947	.	+	.	nearest_ref "XR_001782921.2"; exon_number "2"; gene_id "102636107"; transcript_name "TCONS_00025711"; gene_biotype "lncRNA"; class_code "o"; transcript_id "TCONS_00025711"; gene_name "Gm33272"; transcript_biotype "sense_overlapping"
NC_000087.8	Novogene	exon	90796859	90797248	.	+	.	nearest_ref "XR_001782921.2"; exon_number "3"; gene_id "102636107"; transcript_name "TCONS_00025711"; gene_biotype "lncRNA"; class_code "o"; transcript_id "TCONS_00025711"; gene_name "Gm33272"; transcript_biotype "sense_overlapping"
NC_000087.8	Novogene	exon	90804565	90804686	.	+	.	nearest_ref "XR_001782921.2"; exon_number "4"; gene_id "102636107"; transcript_name "TCONS_00025711"; gene_biotype "lncRNA"; class_code "o"; transcript_id "TCONS_00025711"; gene_name "Gm33272"; transcript_biotype "sense_overlapping"
NC_000087.8	Novogene	exon	90827618	90827727	.	+	.	nearest_ref "XR_001782921.2"; exon_number "5"; gene_id "102636107"; transcript_name "TCONS_00025711"; gene_biotype "lncRNA"; class_code "o"; transcript_id "TCONS_00025711"; gene_name "Gm33272"; transcript_biotype "sense_overlapping"
NC_000087.8	Novogene	exon	90795452	90795675	.	+	.	nearest_ref "XR_001782921.2"; exon_number "1"; gene_id "102636107"; transcript_name "TCONS_00025712"; gene_biotype "lncRNA"; class_code "o"; transcript_id "TCONS_00025712"; gene_name "Gm33272"; transcript_biotype "sense_overlapping"
NC_000087.8	Novogene	exon	90795778	90795947	.	+	.	nearest_ref "XR_001782921.2"; exon_number "2"; gene_id "102636107"; transcript_name "TCONS_00025712"; gene_biotype "lncRNA"; class_code "o"; transcript_id "TCONS_00025712"; gene_name "Gm33272"; transcript_biotype "sense_overlapping"
NC_000087.8	Novogene	exon	90796859	90797248	.	+	.	nearest_ref "XR_001782921.2"; exon_number "3"; gene_id "102636107"; transcript_name "TCONS_00025712"; gene_biotype "lncRNA"; class_code "o"; transcript_id "TCONS_00025712"; gene_name "Gm33272"; transcript_biotype "sense_overlapping"
NC_000087.8	Novogene	exon	90804565	90804686	.	+	.	nearest_ref "XR_001782921.2"; exon_number "4"; gene_id "102636107"; transcript_name "TCONS_00025712"; gene_biotype "lncRNA"; class_code "o"; transcript_id "TCONS_00025712"; gene_name "Gm33272"; transcript_biotype "sense_overlapping"
NC_000087.8	Novogene	exon	90833555	90833672	.	+	.	nearest_ref "XR_001782921.2"; exon_number "5"; gene_id "102636107"; transcript_name "TCONS_00025712"; gene_biotype "lncRNA"; class_code "o"; transcript_id "TCONS_00025712"; gene_name "Gm33272"; transcript_biotype "sense_overlapping"
NC_000087.8	Novogene	exon	90796809	90797248	.	-	.	nearest_ref "XR_001782921.2"; exon_number "1"; gene_id "102636107"; transcript_name "TCONS_00025727"; gene_biotype "lncRNA"; class_code "x"; transcript_id "TCONS_00025727"; gene_name "Gm33272"; transcript_biotype "antisense"
NC_000087.8	Novogene	exon	90804565	90804686	.	-	.	nearest_ref "XR_001782921.2"; exon_number "2"; gene_id "102636107"; transcript_name "TCONS_00025727"; gene_biotype "lncRNA"; class_code "x"; transcript_id "TCONS_00025727"; gene_name "Gm33272"; transcript_biotype "antisense"
NC_000087.8	Novogene	exon	90827618	90827679	.	-	.	nearest_ref "XR_001782921.2"; exon_number "3"; gene_id "102636107"; transcript_name "TCONS_00025727"; gene_biotype "lncRNA"; class_code "x"; transcript_id "TCONS_00025727"; gene_name "Gm33272"; transcript_biotype "antisense"
NC_005089.1	Novogene	exon	1660	1863	.	+	.	nearest_ref "rna-mt-Rnr2.1"; exon_number "1"; gene_id "17725"; transcript_name "TCONS_00025736"; gene_biotype "rRNA"; class_code "o"; transcript_id "TCONS_00025736"; gene_name "mt-Rnr2"; transcript_biotype "sense_overlapping"
NC_005089.1	Novogene	exon	2592	2675	.	+	.	nearest_ref "rna-mt-Rnr2.1"; exon_number "2"; gene_id "17725"; transcript_name "TCONS_00025736"; gene_biotype "rRNA"; class_code "o"; transcript_id "TCONS_00025736"; gene_name "mt-Rnr2"; transcript_biotype "sense_overlapping"
NW_023337853.1	Novogene	exon	1	811	.	+	.	exon_number "1"; gene_id "XLOC_015265"; transcript_name "TCONS_00025775"; gene_biotype "novel"; class_code "u"; transcript_id "TCONS_00025775"; gene_name "XLOC_015265"; transcript_biotype "lincRNA"
NW_023337853.1	Novogene	exon	905	1668	.	+	.	exon_number "2"; gene_id "XLOC_015265"; transcript_name "TCONS_00025775"; gene_biotype "novel"; class_code "u"; transcript_id "TCONS_00025775"; gene_name "XLOC_015265"; transcript_biotype "lincRNA"
NW_023337853.1	Novogene	exon	1	1175	.	+	.	exon_number "1"; gene_id "XLOC_015265"; transcript_name "TCONS_00025777"; gene_biotype "novel"; class_code "u"; transcript_id "TCONS_00025777"; gene_name "XLOC_015265"; transcript_biotype "lincRNA"
NW_023337853.1	Novogene	exon	1579	2005	.	+	.	exon_number "2"; gene_id "XLOC_015265"; transcript_name "TCONS_00025777"; gene_biotype "novel"; class_code "u"; transcript_id "TCONS_00025777"; gene_name "XLOC_015265"; transcript_biotype "lincRNA"
NW_023337853.1	Novogene	exon	2056	4487	.	+	.	exon_number "3"; gene_id "XLOC_015265"; transcript_name "TCONS_00025777"; gene_biotype "novel"; class_code "u"; transcript_id "TCONS_00025777"; gene_name "XLOC_015265"; transcript_biotype "lincRNA"
NW_023337853.1	Novogene	exon	1	1351	.	+	.	exon_number "1"; gene_id "XLOC_015265"; transcript_name "TCONS_00025778"; gene_biotype "novel"; class_code "u"; transcript_id "TCONS_00025778"; gene_name "XLOC_015265"; transcript_biotype "lincRNA"
NW_023337853.1	Novogene	exon	1753	1911	.	+	.	exon_number "2"; gene_id "XLOC_015265"; transcript_name "TCONS_00025778"; gene_biotype "novel"; class_code "u"; transcript_id "TCONS_00025778"; gene_name "XLOC_015265"; transcript_biotype "lincRNA"
NW_023337853.1	Novogene	exon	2067	4565	.	+	.	exon_number "3"; gene_id "XLOC_015265"; transcript_name "TCONS_00025778"; gene_biotype "novel"; class_code "u"; transcript_id "TCONS_00025778"; gene_name "XLOC_015265"; transcript_biotype "lincRNA"
NW_023337853.1	Novogene	exon	566	665	.	+	.	exon_number "1"; gene_id "XLOC_015265"; transcript_name "TCONS_00025779"; gene_biotype "novel"; class_code "u"; transcript_id "TCONS_00025779"; gene_name "XLOC_015265"; transcript_biotype "lincRNA"
NW_023337853.1	Novogene	exon	686	1256	.	+	.	exon_number "2"; gene_id "XLOC_015265"; transcript_name "TCONS_00025779"; gene_biotype "novel"; class_code "u"; transcript_id "TCONS_00025779"; gene_name "XLOC_015265"; transcript_biotype "lincRNA"
NW_023337853.1	Novogene	exon	1	811	.	-	.	exon_number "1"; gene_id "XLOC_015266"; transcript_name "TCONS_00025781"; gene_biotype "novel"; class_code "u"; transcript_id "TCONS_00025781"; gene_name "XLOC_015266"; transcript_biotype "lincRNA"
NW_023337853.1	Novogene	exon	905	1175	.	-	.	exon_number "2"; gene_id "XLOC_015266"; transcript_name "TCONS_00025781"; gene_biotype "novel"; class_code "u"; transcript_id "TCONS_00025781"; gene_name "XLOC_015266"; transcript_biotype "lincRNA"
NW_023337853.1	Novogene	exon	1579	1630	.	-	.	exon_number "3"; gene_id "XLOC_015266"; transcript_name "TCONS_00025781"; gene_biotype "novel"; class_code "u"; transcript_id "TCONS_00025781"; gene_name "XLOC_015266"; transcript_biotype "lincRNA"
