# Supplementary material for: Novel Transcriptomic Interactomes of Noncoding RNAs in the Heart under Altered Thyroid Hormonal States
Source: Int J Mol Sci. 2023 Mar 31;24(7):6560. doi: 10.3390/ijms24076560 (PMC10095585; doi:10.3390/ijms24076560)
Supplement: Supplementary file 1 [file ijms-24-06560-s001.zip › Supplemental File S2 LncRNA GO Enrichment Analysis.xlsx]

## Sheet: HypoTH vs Control
Category	ID	Description	GeneRatio	BgRatio	pvalue	padj	Count	geneID
MF	GO:0003700	DNA-binding transcription factor activity	186|204	367|13481	1.0042e-262	3.0126e-261	186	68837,20848,15900,208647,217166,56632,20847,20846,16478,52679,26379,18019,18018,19015,19016,19013,19018,54446,11911,22260,72033,66500,211586,14247,72504,19401,54601,21678,21677,21676,11835,54123,77110,15500,230700,100978,13559,69257,60611,14463,14461,13557,13555,14465,12609,19885,11908,11909,71375,107503,18986,73274,110784,432800,69256,54131,23872,23871,27049,12398,74120,74123,12395,93681,20850,2…
BP	GO:0009058	biosynthetic process	192|204	2879|13481	3.3315e-128	4.9972e-127	192	68837,20848,15900,208647,217166,56632,20847,20846,16478,52679,26379,18019,18018,19015,19016,19013,19018,54446,11911,22260,72033,66500,211586,14247,72504,19401,54601,21678,21677,21676,11835,54123,225895,77110,15500,230700,100978,13559,69257,60611,14463,14461,13557,13555,14465,12609,328572,19885,11908,11909,71375,107503,18986,73274,110784,432800,69256,54131,23872,23871,27049,12398,74120,74123,12395…
BP	GO:0034641	cellular nitrogen compound metabolic process	191|204	3074|13481	7.8731e-120	7.8731e-119	191	68837,20848,15900,208647,217166,56632,20847,20846,16478,52679,26379,18019,18018,19015,19016,19013,19018,54446,11911,22260,72033,66500,211586,14247,72504,19401,54601,21678,21677,21676,11835,54123,225895,77110,15500,230700,100978,13559,69257,60611,14463,14461,13557,13555,14465,12609,328572,19885,11908,11909,71375,107503,18986,73274,110784,432800,69256,54131,23872,23871,27049,12398,74120,74123,12395…
MF	GO:0003677	DNA binding	120|204	1088|13481	2.737e-75	2.0528e-74	120	68837,20848,19885,217166,56632,20847,20846,16478,26379,18019,18018,19015,19016,19013,11911,11910,66500,19401,54601,11835,15500,230700,69257,60611,14463,14461,14465,11908,11909,71375,107503,18986,110784,432800,23872,23871,27049,74123,54446,20850,20851,20852,56501,19664,21833,14236,22025,14234,12912,13864,21834,12916,12915,23942,26427,17425,20182,20183,20181,20024,14282,22259,17300,14281,56458,2638…
CC	GO:0005634	nucleus	71|204	731|13481	5.7125e-37	3.4275e-36	71	18515,73274,110784,217166,432800,13876,15370,14247,72504,21388,76365,18030,26379,18032,18029,13207,19015,19016,19013,18516,12400,22260,17978,14390,21386,218772,19664,21833,19401,22026,22025,13864,18514,57246,21678,21677,21676,13865,11835,12914,23871,21385,21834,18027,225895,19885,18124,77110,15500,330959,100978,18028,20183,14009,20182,104156,20181,17975,14463,17977,14465,29808,22259,14815,328572,…
CC	GO:0043226	organelle	71|204	2452|13481	6.3122e-18	2.7513e-17	71	18515,73274,110784,217166,432800,13876,15370,14247,72504,21388,76365,18030,26379,18032,18029,13207,19015,19016,19013,18516,12400,22260,17978,14390,21386,218772,19664,21833,19401,22026,22025,13864,18514,57246,21678,21677,21676,13865,11835,12914,23871,21385,21834,18027,225895,19885,18124,77110,15500,330959,100978,18028,20183,14009,20182,104156,20181,17975,14463,17977,14465,29808,22259,14815,328572,…
CC	GO:0005622	intracellular	95|204	3378|13481	6.4196e-18	2.7513e-17	95	217166,52679,26379,19015,19016,19013,12400,22260,65020,211586,19401,21678,21677,21676,11835,225895,77110,15500,100978,13559,14463,13557,13555,14465,104156,73274,110784,432800,23872,23871,74120,328572,217127,19664,13865,22026,22025,235682,21833,13864,12914,21834,17131,17130,20182,17978,20181,17975,17977,22259,26380,26381,268417,13876,72504,17128,17129,17126,17127,80902,17125,13207,218772,449521,17…
CC	GO:0005623	cell	95|204	3470|13481	9.935e-17	3.7256e-16	95	217166,52679,26379,19015,19016,19013,12400,22260,65020,211586,19401,21678,21677,21676,11835,225895,77110,15500,100978,13559,14463,13557,13555,14465,104156,73274,110784,432800,23872,23871,74120,328572,217127,19664,13865,22026,22025,235682,21833,13864,12914,21834,17131,17130,20182,17978,20181,17975,17977,22259,26380,26381,268417,13876,72504,17128,17129,17126,17127,80902,17125,13207,218772,449521,17…
BP	GO:0048646	anatomical structure formation involved in morphogenesis	2|204	6|13481	0.0039256	0.012864	2	67154105245911
BP	GO:0007165	signal transduction	45|204	1744|13481	0.004288	0.012864	45	20848,110784,217166,20847,20846,18034,17128,17129,26379,17126,17127,17125,19015,19016,19013,105245911,22260,20850,20851,20852,21833,19401,22026,22025,13864,71609,218772,13865,11835,16653,21834,19885,18124,17131,17130,20182,20183,20181,15370,67154,353187,22259,14815,26380,26381

## Sheet: HypoTH+T3 vs HypoTH
Category	ID	Description	GeneRatio	BgRatio	pvalue	padj	Count	geneID
MF	GO:0003700	DNA-binding transcription factor activity	94|98	367|13481	3.7e-54	2.59e-53	94	20848,211586,56632,20847,20846,26379,18018,19015,19016,19013,19018,72033,217166,19401,54601,54123,69257,60611,14463,69256,13555,14465,11909,71375,107503,18986,73274,23872,12398,74123,12395,54446,20850,20851,20852,56501,19664,14234,235682,21833,13864,21834,12915,56484,26427,18109,20182,14282,14281,56458,26381,268417,20375,13875,13876,72504,218772,68703,21388,18044,57246,21385,75507,108655,226641,5…
BP	GO:0009058	biosynthetic process	93|98	2879|13481	3.7e-54	2.59e-53	93	20848,211586,56632,20847,20846,26379,18018,19015,19016,19013,19018,72033,217166,19401,54601,54123,69257,60611,14463,69256,13555,14465,11909,71375,107503,18986,73274,23872,12398,74123,12395,54446,20850,20851,20852,56501,19664,14234,235682,21833,13864,21834,12915,19885,26427,18109,20182,17975,14282,14281,56458,26381,268417,20375,13875,13876,72504,218772,68703,21388,18044,57246,21385,75507,108655,22…
BP	GO:0034641	cellular nitrogen compound metabolic process	93|98	3074|13481	3.7e-54	2.59e-53	93	20848,211586,56632,20847,20846,26379,18018,19015,19016,19013,19018,72033,217166,19401,54601,54123,69257,60611,14463,69256,13555,14465,11909,71375,107503,18986,73274,23872,12398,74123,12395,54446,20850,20851,20852,56501,19664,14234,235682,21833,13864,21834,12915,19885,26427,18109,20182,17975,14282,14281,56458,26381,268417,20375,13875,13876,72504,218772,68703,21388,18044,57246,21385,75507,108655,22…
MF	GO:0003677	DNA binding	68|98	1088|13481	3.7e-50	1.94e-49	68	107503,20848,18515,18033,13875,217166,56632,20847,20846,13876,18986,18030,26379,18018,12611,19015,19016,13713,19013,74123,14390,20375,329934,54446,20850,20851,20852,218772,56501,19664,19401,14009,54601,14234,23872,21833,13864,21834,56484,12915,12608,19885,18021,26427,75507,108655,12606,226641,20182,69257,60611,100040260,14463,68703,223922,14465,14282,14815,14281,56458,18514,26381,232430,13170,119…
CC	GO:0005634	nucleus	35|98	731|13481	2.54e-19	1.07e-18	35	1.85157e+177
CC	GO:0043226	organelle	36|98	2452|13481	1.04e-09	3.64e-09	36	1.85157e+183
CC	GO:0005622	intracellular	41|98	3378|13481	1.49e-06	4.47e-06	41	###############################################################################################################################################################################################################################################################
CC	GO:0005623	cell	41|98	3470|13481	4.19e-06	1.1e-05	41	###############################################################################################################################################################################################################################################################

## Sheet: HyperTH vs HypoTH
Category	ID	Description	GeneRatio	BgRatio	pvalue	padj	Count	geneID
MF	GO:0003700	DNA-binding transcription factor activity	168|184	367|13481	1.22e-235	4.14e-234	168	20848,15900,19885,217166,56632,20847,20846,16478,52679,26379,18019,27049,19015,19016,19013,20375,54446,11911,11910,72033,66500,211586,19401,54601,29808,21677,21676,54123,77110,15500,230700,13559,69257,69256,14463,60611,13557,13555,14465,12609,11908,11909,71375,107503,18986,73274,449521,54131,23872,23871,18018,12398,12396,74120,74123,12395,13864,93681,20850,20851,20852,237558,56501,19664,78619,220…
BP	GO:0009058	biosynthetic process	174|184	2879|13481	4.6e-116	7.82e-115	174	20848,15900,19885,217166,56632,20847,20846,16478,52679,26379,18019,27049,19015,19016,19013,20375,54446,11911,11910,72033,66500,211586,19401,54601,29808,21677,21676,54123,238505,77110,15500,230700,13559,69257,69256,14463,60611,13557,13555,14465,12609,328572,11908,11909,71375,107503,18986,73274,449521,104156,54131,23872,23871,18018,12398,12396,74120,74123,12395,14815,13864,93681,20850,20851,20852,2…
BP	GO:0034641	cellular nitrogen compound metabolic process	173|184	3074|13481	2.66e-108	3.01e-107	173	20848,15900,19885,217166,56632,20847,20846,16478,52679,26379,18019,27049,19015,19016,19013,20375,54446,11911,11910,72033,66500,211586,19401,54601,29808,21677,21676,54123,77110,15500,230700,13559,69257,69256,14463,60611,13557,13555,14465,12609,328572,11908,11909,71375,107503,18986,73274,449521,104156,54131,23872,23871,18018,12398,12396,74120,74123,12395,14815,13864,93681,20850,20851,20852,237558,5…
MF	GO:0003677	DNA binding	110|184	1088|13481	3e-70	2.55e-69	110	20848,19885,217166,54601,20847,20846,16478,26379,18019,27049,19015,19016,19013,20375,11911,11910,66500,19401,56632,15500,230700,69257,60611,14463,14461,14465,11908,11909,71375,107503,18986,110784,23872,23871,18018,74123,13864,54446,20850,20851,20852,237558,56501,19664,21833,22026,14234,12912,12913,21834,12915,23942,26427,17425,20182,104156,20181,26386,17300,14281,56458,26381,73181,18021,225908,13…
CC	GO:0005634	nucleus	60|184	731|13481	7.57e-30	5.15e-29	60	###############################################################################################################################################################################################################################################################
CC	GO:0043226	organelle	61|184	2452|13481	7.04e-14	3.99e-13	61	18515,73274,140781,19885,217166,13876,72504,18030,26379,18032,104156,13207,19015,19016,19013,110784,76365,21834,14390,18029,218772,19664,13865,19401,22026,21388,29808,57246,23872,21677,21676,21833,13864,12914,23871,21385,433586,15370,19883,14011,18124,77110,15500,330959,18028,20183,14009,20182,17978,20181,17975,14463,17977,14465,26386,14815,328572,217127,18514,26381,15499
CC	GO:0005622	intracellular	80|184	3378|13481	5.71e-13	2.77e-12	80	18515,73274,449521,19885,217166,29808,110784,13876,104156,52679,72504,17128,17129,18030,26379,18032,17126,22757,13207,19015,19016,15370,19013,74120,140781,170936,65020,76365,21834,14390,18029,211586,218772,19664,13865,19401,22026,21388,235682,50496,57246,23872,21677,21676,21833,13864,12914,23871,21385,433586,238505,19883,21781,14011,18124,14009,77110,15500,330959,17131,18028,20183,13559,20182,179…
CC	GO:0005623	cell	80|184	3470|13481	4.92e-12	2.09e-11	80	18515,73274,449521,19885,217166,29808,110784,13876,104156,52679,72504,17128,17129,18030,26379,18032,17126,22757,13207,19015,19016,15370,19013,74120,140781,170936,65020,76365,21834,14390,18029,211586,218772,19664,13865,19401,22026,21388,235682,50496,57246,23872,21677,21676,21833,13864,12914,23871,21385,433586,238505,19883,21781,14011,18124,14009,77110,15500,330959,17131,18028,20183,13559,20182,179…
BP	GO:0048646	anatomical structure formation involved in morphogenesis	2|184	6|13481	0.0036445	0.013768	2	67154105245911
