# Supplementary material for: Novel Transcriptomic Interactomes of Noncoding RNAs in the Heart under Altered Thyroid Hormonal States
Source: Int J Mol Sci. 2023 Mar 31;24(7):6560. doi: 10.3390/ijms24076560 (PMC10095585; doi:10.3390/ijms24076560)
Supplement: Supplementary file 1 [file ijms-24-06560-s001.zip › Supplemental File S3 lncRNA KEGG Enrichment Analysis.xlsx]

## Sheet: HypoTH vs Control
Category	ID	Description	GeneRatio	BgRatio	pvalue	padj	Count	geneID
KEGG	mmu05161	Hepatitis B	31|108	146|7916	5.06533e-38	6.83819e-36	31	20848|18021|20847|20846|17128|208647|18033|18019|18018|54131|12675|13712|11911|14281|20850|20851|20852|231991|12914|12912|12913|16653|12915|54123|73181|26427|13557|13555|328572|16150|11909
KEGG	mmu05166	HTLV-I infection	31|108	295|7916	1.64394e-29	1.10966e-27	31	18021|18034|17128|18033|18019|18018|17126|17127|19698|23872|23871|12675|13712|11911|11910|14281|20850|20851|22433|12914|12912|16653|12916|73181|100040260|13557|13555|328572|16150|11908|11909
KEGG	mmu05202	Transcriptional misregulation in cancer	22|108	180|7916	1.68475e-22	7.58137e-21	22	432800|13876|19696|14247|18033|17125|13207|19016|12395|19401|14009|18124|12606|104156|20182|20183|20181|100040260|18516|56458|18514|11908
KEGG	mmu05200	Pathways in cancer	28|108	398|7916	2.64924e-22	8.94118e-21	28	20848|20846|18034|17128|18033|17126|17127|19015|19016|12675|12395|14281|20850|20851|19401|218772|12914|11835|16653|12606|20182|20183|20181|13557|13555|328572|56458|16150
KEGG	mmu05203	Viral carcinogenesis	22|108	245|7916	7.80678e-20	2.10783e-18	22	20848|19696|18034|208647|18033|54131|11911|16391|20850|20851|19664|231991|16653|12912|12913|12914|12915|54123|26427|328572|71609|11909
KEGG	mmu05215	Prostate cancer	16|108	89|7916	4.43005e-19	9.96762e-18	16	12913|231991|12675|16653|12912|11835|13557|13555|11911|16150|328572|12914|208647|18033|26427|56458
KEGG	mmu04380	Osteoclast differentiation	15|108	133|7916	3.08598e-15	5.95153e-14	15	19016|14281|12675|12912|20847|20846|16478|14282|18034|16391|18033|16150|18019|18018|19698
KEGG	mmu04211	Longevity regulating pathway	13|108	96|7916	2.65377e-14	4.47824e-13	13	19016|231991|12912|12913|16653|12915|56484|11911|208647|18033|26427|11909|56458
KEGG	mmu05221	Acute myeloid leukemia	11|108	57|7916	8.32518e-14	1.24278e-12	11	19401|19015|20848|12675|12395|16653|20850|20851|18033|16150|12606
KEGG	mmu05160	Hepatitis C	14|108	137|7916	9.20576e-14	1.24278e-12	14	20848|18033|20181|12675|16653|19013|20847|20846|54123|22259|16391|71609|16150|54131
KEGG	mmu04668	TNF signaling pathway	13|108	112|7916	1.61402e-13	1.98084e-12	13	18033|231991|12675|12912|12913|12915|11911|16150|14281|208647|71609|26427|11909
KEGG	mmu04919	Thyroid hormone signaling pathway	13|108	117|7916	2.69441e-13	3.03122e-12	13	20182|20183|20181|14463|21833|16653|21834|20846|328572|12914|56458|17977|17978
KEGG	mmu05030	Cocaine addiction	10|108	49|7916	7.0246e-13	7.29477e-12	10	11911|231991|12912|12913|12915|14282|208647|18033|26427|11909
KEGG	mmu04068	FoxO signaling pathway	13|108	135|7916	1.44614e-12	1.39449e-11	13	20848|12675|12914|54601|16653|17128|56484|329934|328572|56458|16150|17126|17127
KEGG	mmu04931	Insulin resistance	12|108	111|7916	3.05278e-12	2.7475e-11	12	20848|22260|231991|12912|19013|22259|56458|18033|26427|12913|16150|208647
KEGG	mmu04350	TGF-beta signaling pathway	11|108	85|7916	4.20944e-12	3.55171e-11	11	13559|12914|21781|17127|17128|328572|17131|17130|17126|17129|17125
KEGG	mmu04925	Aldosterone synthesis and secretion	11|108	86|7916	4.72604e-12	3.75303e-11	11	231991|100040260|15370|12912|12913|12915|11911|208647|26427|11908|11909
KEGG	mmu05212	Pancreatic cancer	10|108	66|7916	9.87091e-12	7.40318e-11	10	20848|12675|13557|20846|13555|17128|18033|16150|17126|17127
KEGG	mmu05031	Amphetamine addiction	10|108	68|7916	1.28935e-11	9.16118e-11	10	11911|231991|12912|12913|12915|14282|14281|208647|26427|11909
KEGG	mmu05220	Chronic myeloid leukemia	10|108	73|7916	2.43577e-11	1.62699e-10	10	12675|16653|13557|13555|17128|20850|20851|18033|16150|17127
KEGG	mmu04922	Glucagon signaling pathway	11|108	102|7916	2.56603e-11	1.62699e-10	11	12913|231991|12912|19013|12914|11911|328572|56458|26427|11909|208647
KEGG	mmu04022	cGMP-PKG signaling pathway	13|108	173|7916	2.65139e-11	1.62699e-10	13	11909|231991|14463|12912|18021|12915|11911|208647|12913|73181|26427|18019|18018
KEGG	mmu04933	AGE-RAGE signaling pathway in diabetic complications	11|108	103|7916	2.82703e-11	1.65934e-10	11	20848|16653|20846|17128|20850|20851|18033|18018|17126|17127|56458
KEGG	mmu04010	MAPK signaling pathway	14|108	254|7916	2.1737e-10	1.22271e-09	14	18018|12675|15370|13712|16653|16478|11911|18034|14281|18033|18021|16150|11909|19698
KEGG	mmu04915	Estrogen signaling pathway	10|108	98|7916	3.45746e-10	1.86703e-09	10	231991|12912|12913|16653|12915|11911|14281|208647|26427|11909
KEGG	mmu05168	Herpes simplex infection	13|108	224|7916	5.37047e-10	2.78851e-09	13	328572|14281|12675|12914|20847|20846|54123|72504|225895|18033|16391|16150|54131
KEGG	mmu04920	Adipocytokine signaling pathway	9|108	73|7916	5.7999e-10	2.89995e-09	9	20848|20182|20183|20181|12675|18033|19013|71609|16150
KEGG	mmu04151	PI3K-Akt signaling pathway	15|108	350|7916	1.33714e-09	6.44691e-09	15	12913|231991|12675|15370|12912|20181|16653|12915|56484|11911|16150|208647|18033|26427|11909
KEGG	mmu05223	Non-small cell lung cancer	8|108	56|7916	1.86195e-09	8.66768e-09	8	218772|20182|20183|20181|16653|13557|13555|56484
KEGG	mmu05222	Small cell lung cancer	9|108	85|7916	1.99298e-09	8.9684e-09	9	218772|20182|20183|20181|12675|13557|13555|18033|16150
KEGG	mmu05321	Inflammatory bowel disease (IBD)	8|108	59|7916	2.70672e-09	1.17873e-08	8	20848|18033|20846|19885|20852|18018|17126|17127
KEGG	mmu04110	Cell cycle	10|108	125|7916	3.10666e-09	1.31062e-08	10	13559|211586|13557|13555|17128|328572|12914|21781|17126|17127
KEGG	mmu05162	Measles	10|108	139|7916	8.07575e-09	3.30371e-08	10	20848|12675|20847|20846|54123|16391|20850|20851|18033|54131
KEGG	mmu05169	Epstein-Barr virus infection	12|108	232|7916	8.5767e-09	3.40546e-08	12	20848|18033|12675|11909|12914|18034|328572|71609|16150|19664|54131|19698
KEGG	mmu04918	Thyroid hormone synthesis	8|108	71|7916	1.0254e-08	3.9551e-08	8	231991|12912|12913|12915|11911|208647|26427|11909
KEGG	mmu04917	Prolactin signaling pathway	8|108	74|7916	1.38196e-08	5.18235e-08	8	20848|16653|20846|56484|14281|20850|20851|18033
KEGG	mmu04662	B cell receptor signaling pathway	8|108	75|7916	1.52246e-08	5.55493e-08	8	12675|16653|14281|18033|18021|16150|18019|18018
KEGG	mmu04024	cAMP signaling pathway	11|108	198|7916	1.8076e-08	6.42173e-08	11	12913|231991|12912|19013|12914|328572|208647|18033|26427|18018|14281
KEGG	mmu04911	Insulin secretion	8|108	86|7916	4.08797e-08	1.41507e-07	8	231991|12912|12913|12915|11911|208647|26427|11909
KEGG	mmu05164	Influenza A	10|108	172|7916	5.43368e-08	1.83387e-07	10	12914|20847|20846|54123|328572|18033|16391|16150|11909|54131
KEGG	mmu04728	Dopaminergic synapse	9|108	135|7916	8.4801e-08	2.79223e-07	9	231991|12912|12913|12915|11911|14281|208647|26427|11909
KEGG	mmu04550	Signaling pathways regulating pluripotency of stem cells	9|108	140|7916	1.13687e-07	3.65423e-07	9	20848|16653|21386|17128|17129|26380|17126|17127|17125
KEGG	mmu04310	Wnt signaling pathway	9|108	146|7916	1.59356e-07	5.00305e-07	9	19015|18021|12914|17128|328572|73181|18019|18018|17127
KEGG	mmu04660	T cell receptor signaling pathway	8|108	105|7916	1.7245e-07	5.29107e-07	8	12675|16653|14281|18033|18021|16150|18019|18018
KEGG	mmu04261	Adrenergic signaling in cardiomyocytes	9|108	152|7916	2.20215e-07	6.60646e-07	9	231991|12912|12913|12915|12916|11911|208647|26427|11909
KEGG	mmu05034	Alcoholism	10|108	204|7916	2.46297e-07	7.22829e-07	10	11911|231991|12912|12913|16653|12915|14282|208647|26427|11909
KEGG	mmu04725	Cholinergic synapse	8|108	113|7916	2.92446e-07	8.40005e-07	8	231991|12912|12913|16653|11911|14281|208647|26427
KEGG	mmu04630	Jak-STAT signaling pathway	9|108	161|7916	3.49124e-07	9.81912e-07	9	20848|12914|20847|20846|328572|20850|20851|20852|16391
KEGG	mmu03320	PPAR signaling pathway	7|108	85|7916	6.3398e-07	1.74668e-06	7	19015|19016|20182|20183|20181|19013|22259
KEGG	mmu04152	AMPK signaling pathway	8|108	129|7916	7.55691e-07	2.04036e-06	8	19016|231991|12912|12913|56484|56458|26427|208647
KEGG	mmu05152	Tuberculosis	9|108	179|7916	8.12588e-07	2.15097e-06	9	18044|18033|12912|56632|12914|20846|328572|71609|12611
KEGG	mmu05216	Thyroid cancer	5|108	29|7916	9.7734e-07	2.53732e-06	5	20182|19016|16653|20183|20181
KEGG	mmu04916	Melanogenesis	7|108	99|7916	1.65665e-06	4.21976e-06	7	16653|12912|12913|12914|328572|208647|26427
KEGG	mmu04062	Chemokine signaling pathway	9|108	198|7916	1.8051e-06	4.51276e-06	9	20848|12675|20847|16653|20846|56484|20851|18033|16150
KEGG	mmu05016	Huntington's disease	9|108	199|7916	1.87818e-06	4.52879e-06	9	19016|231991|12912|12913|12914|72504|328572|208647|26427
KEGG	mmu04620	Toll-like receptor signaling pathway	7|108	101|7916	1.87861e-06	4.52879e-06	7	12675|20846|54123|14281|18033|16150|54131
KEGG	mmu04390	Hippo signaling pathway	8|108	154|7916	2.66599e-06	6.31418e-06	8	21678|21677|21676|17128|17131|17126|17127|17125
KEGG	mmu04932	Non-alcoholic fatty liver disease (NAFLD)	8|108	157|7916	3.05589e-06	6.9956e-06	8	20181|22433|11911|22259|18033|16150|19013|12606
KEGG	mmu04622	RIG-I-like receptor signaling pathway	6|108	69|7916	3.05734e-06	6.9956e-06	6	71609|12675|54123|18033|16150|54131
KEGG	mmu04962	Vasopressin-regulated water reabsorption	5|108	43|7916	5.66267e-06	1.2741e-05	5	26427|12912|12913|208647|231991
KEGG	mmu04014	Ras signaling pathway	9|108	231|7916	6.02807e-06	1.33408e-05	9	23872|23871|54601|12675|13712|16653|19696|18033|16150
KEGG	mmu04722	Neurotrophin signaling pathway	7|108	122|7916	6.13141e-06	1.33507e-05	7	170936|16653|56484|11911|65020|18033|16150
KEGG	mmu04210	Apoptosis	7|108	139|7916	1.37874e-05	2.95444e-05	7	18033|12675|16653|11911|14281|71609|16150
KEGG	mmu04064	NF-kappa B signaling pathway	6|108	104|7916	2.78867e-05	5.79185e-05	6	71609|12675|18034|18033|16150|19698
KEGG	mmu05142	Chagas disease (American trypanosomiasis)	6|108	104|7916	2.78867e-05	5.79185e-05	6	12675|14281|18033|16150|17126|17127
KEGG	mmu04921	Oxytocin signaling pathway	7|108	158|7916	3.0342e-05	6.20632e-05	7	73181|13712|16653|14281|18021|18019|18018
KEGG	mmu04623	Cytosolic DNA-sensing pathway	5|108	64|7916	3.39611e-05	6.8429e-05	5	54123|12675|54131|18033|16150
KEGG	mmu04520	Adherens junction	5|108	74|7916	6.52468e-05	0.000129534	5	12914|17128|328572|17126|17127
KEGG	mmu05206	MicroRNAs in cancer	8|108	281|7916	0.00016693	0.000326602	8	20848|16653|13557|13555|328572|12914|18033|16150
KEGG	mmu05145	Toxoplasmosis	5|108	113|7916	0.000428731	0.000826839	5	12675|16150|20848|20846|18033
KEGG	mmu05210	Colorectal cancer	4|108	64|7916	0.000478389	0.000907608	4	17128|14281|17126|17127
KEGG	mmu04392	Hippo signaling pathway -multiple species	3|108	26|7916	0.000484057	0.000907608	3	21677|21676|21678
KEGG	mmu04720	Long-term potentiation	4|108	66|7916	0.000534182	0.000987872	4	11911|12914|328572|16653
KEGG	mmu05140	Leishmaniasis	4|108	67|7916	0.000563745	0.00102845	4	13712|20846|18033|14281
KEGG	mmu05211	Renal cell carcinoma	4|108	68|7916	0.000594451	0.00107001	4	12914|23871|328572|16653
KEGG	mmu04710	Circadian rhythm	3|108	31|7916	0.000777421	0.00138095	3	217166|12912|19885
KEGG	mmu05133	Pertussis	4|108	74|7916	0.000804089	0.00140977	4	18033|14281|54131|15900
KEGG	mmu04012	ErbB signaling pathway	4|108	87|7916	0.00142817	0.00247183	4	20850|13712|16653|20851
KEGG	mmu05219	Bladder cancer	3|108	41|7916	0.00165497	0.00282811	3	13557|16653|13555
KEGG	mmu01522	Endocrine resistance	4|108	95|7916	0.00194654	0.00328479	4	13557|14281|16653|13555
KEGG	mmu04330	Notch signaling pathway	3|108	49|7916	0.00267718	0.00446197	3	328572|12914|19664
KEGG	mmu05213	Endometrial cancer	3|108	52|7916	0.00314135	0.00517174	3	13712|16653|56484
KEGG	mmu04066	HIF-1 signaling pathway	4|108	110|7916	0.00324483	0.00527774	4	20848|328572|12914|18033
KEGG	mmu05134	Legionellosis	3|108	58|7916	0.00421046	0.00676682	3	18034|15499|18033
KEGG	mmu04621	NOD-like receptor signaling pathway	3|108	59|7916	0.00440748	0.00700011	3	12675|16150|18033
KEGG	mmu04370	VEGF signaling pathway	3|108	60|7916	0.00460999	0.00723661	3	18019|56632|16653
KEGG	mmu04071	Sphingolipid signaling pathway	4|108	125|7916	0.00503524	0.00781331	4	56632|16653|18033|71609
KEGG	mmu04213	Longevity regulating pathway - multiple species	3|108	64|7916	0.00547592	0.00840056	3	16653|56458|56484
KEGG	mmu05214	Glioma	3|108	65|7916	0.00570658	0.0085611	3	13557|16653|13555
KEGG	mmu05205	Proteoglycans in cancer	5|108	208|7916	0.0057074	0.0085611	5	13207|17126|20848|16653|13712
KEGG	mmu05218	Melanoma	3|108	72|7916	0.00748405	0.0111027	3	13557|16653|13555
KEGG	mmu04910	Insulin signaling pathway	4|108	142|7916	0.00775141	0.0113744	4	16150|13712|16653|56458
KEGG	mmu04320	Dorso-ventral axis formation	2|108	26|7916	0.00964806	0.0140052	2	23872|23871
KEGG	mmu01521	EGFR tyrosine kinase inhibitor resistance	3|108	82|7916	0.0105337	0.0151282	3	20848|16653|56484
KEGG	mmu04912	GnRH signaling pathway	3|108	88|7916	0.0126611	0.0179921	3	11911|13712|16653
KEGG	mmu04141	Protein processing in endoplasmic reticulum	4|108	167|7916	0.0132596	0.0186463	4	11911|226641|12915|22433
KEGG	mmu04360	Axon guidance	4|108	176|7916	0.0157251	0.0218854	4	18019|18021|16653|73181
KEGG	mmu03022	Basal transcription factors	2|108	44|7916	0.0248252	0.034198	2	72504|225895
KEGG	mmu04650	Natural killer cell mediated cytotoxicity	3|108	121|7916	0.0284927	0.0388536	3	18019|18018|16653

## Sheet: HypoTH+T3 vs HypoTH
Category	ID	Description	GeneRatio	BgRatio	pvalue	padj	Count	geneID
KEGG	mmu05161	Hepatitis B	16|54	146|7916	4.02604e-21	4.42865e-19	16	20848|18033|11909|20847|12915|13555|20846|54123|14281|20850|208647|20852|18021|26427|18018|20851
KEGG	mmu05202	Transcriptional misregulation in cancer	15|54	180|7916	3.36728e-18	1.852e-16	15	13207|14009|19016|20182|18514|100040260|12395|20375|13876|12608|19401|18033|18109|12606|56458
KEGG	mmu05200	Pathways in cancer	16|54	398|7916	1.27379e-14	4.67058e-13	16	19015|19016|20848|20182|218772|12395|20375|20846|13555|20851|14281|20850|19401|18033|12606|56458
KEGG	mmu05221	Acute myeloid leukemia	9|54	57|7916	1.14596e-13	3.1514e-12	9	19015|20848|12395|20375|20850|19401|18033|12606|20851
KEGG	mmu05203	Viral carcinogenesis	11|54	245|7916	7.08184e-11	1.558e-09	11	20848|11909|12915|54123|16391|20850|208647|18033|26427|19664|20851
KEGG	mmu04380	Osteoclast differentiation	9|54	133|7916	1.31655e-10	2.41368e-09	9	19016|14281|20847|20375|20846|14282|16391|18033|18018
KEGG	mmu04211	Longevity regulating pathway	8|54	96|7916	3.09476e-10	4.8632e-09	8	19016|12915|56484|208647|18033|26427|11909|56458
KEGG	mmu05166	HTLV-I infection	11|54	295|7916	4.70133e-10	6.46433e-09	11	23872|18018|100040260|20375|13555|14281|20850|20851|18033|18021|11909
KEGG	mmu04917	Prolactin signaling pathway	7|54	74|7916	1.82555e-09	2.23123e-08	7	20848|20846|56484|14281|20850|20851|18033
KEGG	mmu05162	Measles	8|54	139|7916	4.88821e-09	5.37703e-08	8	20848|20847|20846|54123|16391|20850|20851|18033
KEGG	mmu05030	Cocaine addiction	6|54	49|7916	6.62127e-09	6.62127e-08	6	12915|14282|208647|18033|26427|11909
KEGG	mmu04933	AGE-RAGE signaling pathway in diabetic complications	7|54	103|7916	1.57197e-08	1.44097e-07	7	20848|20846|20850|56458|18033|18018|20851
KEGG	mmu05321	Inflammatory bowel disease (IBD)	6|54	59|7916	1.84776e-08	1.56349e-07	6	20848|18033|20846|19885|20852|18018
KEGG	mmu04022	cGMP-PKG signaling pathway	8|54	173|7916	2.49407e-08	1.95962e-07	8	18018|140781|14463|12915|208647|18021|26427|11909
KEGG	mmu04668	TNF signaling pathway	7|54	112|7916	2.71543e-08	1.99132e-07	7	12915|12608|14281|208647|18033|26427|11909
KEGG	mmu05031	Amphetamine addiction	6|54	68|7916	4.06733e-08	2.79629e-07	6	12915|14282|14281|208647|26427|11909
KEGG	mmu05160	Hepatitis C	7|54	137|7916	1.01048e-07	6.53839e-07	7	20848|19013|20847|20846|54123|16391|18033
KEGG	mmu04630	Jak-STAT signaling pathway	7|54	161|7916	2.88799e-07	1.76488e-06	7	20848|20847|20846|16391|20850|20851|20852
KEGG	mmu04931	Insulin resistance	6|54	111|7916	6.28026e-07	3.63594e-06	6	20848|19013|208647|18033|26427|56458
KEGG	mmu04919	Thyroid hormone signaling pathway	6|54	117|7916	8.42727e-07	4.635e-06	6	20182|14463|21833|21834|20846|56458
KEGG	mmu05168	Herpes simplex infection	7|54	224|7916	2.43495e-06	1.27545e-05	7	14281|20847|20846|54123|72504|16391|18033
KEGG	mmu04925	Aldosterone synthesis and secretion	5|54	86|7916	4.02631e-06	2.01316e-05	5	26427|100040260|11909|12915|208647
KEGG	mmu05215	Prostate cancer	5|54	89|7916	4.72345e-06	2.25904e-05	5	26427|56458|13555|18033|208647
KEGG	mmu05164	Influenza A	6|54	172|7916	7.17834e-06	3.25432e-05	6	20847|20846|54123|16391|18033|11909
KEGG	mmu04915	Estrogen signaling pathway	5|54	98|7916	7.39618e-06	3.25432e-05	5	26427|11909|14281|12915|208647
KEGG	mmu04922	Glucagon signaling pathway	5|54	102|7916	8.90892e-06	3.64482e-05	5	26427|19013|11909|208647|56458
KEGG	mmu05152	Tuberculosis	6|54	179|7916	8.94638e-06	3.64482e-05	6	18044|56632|20846|12608|18033|12611
KEGG	mmu04062	Chemokine signaling pathway	6|54	198|7916	1.55828e-05	5.91071e-05	6	20848|20847|20846|56484|20851|18033
KEGG	mmu04024	cAMP signaling pathway	6|54	198|7916	1.55828e-05	5.91071e-05	6	19013|14281|208647|18033|26427|18018
KEGG	mmu05223	Non-small cell lung cancer	4|54	56|7916	1.81866e-05	6.66842e-05	4	218772|20182|56484|13555
KEGG	mmu04152	AMPK signaling pathway	5|54	129|7916	2.64821e-05	9.39689e-05	5	26427|19016|208647|56484|56458
KEGG	mmu04728	Dopaminergic synapse	5|54	135|7916	3.2673e-05	0.00010847	5	26427|11909|14281|12915|208647
KEGG	mmu04068	FoxO signaling pathway	5|54	135|7916	3.2673e-05	0.00010847	5	54601|329934|20848|56458|56484
KEGG	mmu05212	Pancreatic cancer	4|54	66|7916	3.35271e-05	0.00010847	4	20848|13555|18033|20846
KEGG	mmu04918	Thyroid hormone synthesis	4|54	71|7916	4.40074e-05	0.000138309	4	26427|11909|12915|208647
KEGG	mmu04920	Adipocytokine signaling pathway	4|54	73|7916	4.88045e-05	0.000145094	4	20848|20182|18033|19013
KEGG	mmu05220	Chronic myeloid leukemia	4|54	73|7916	4.88045e-05	0.000145094	4	20850|13555|18033|20851
KEGG	mmu04662	B cell receptor signaling pathway	4|54	75|7916	5.39727e-05	0.000156237	4	18018|14281|18033|18021
KEGG	mmu04261	Adrenergic signaling in cardiomyocytes	5|54	152|7916	5.64242e-05	0.000159145	5	26427|140781|11909|12915|208647
KEGG	mmu05222	Small cell lung cancer	4|54	85|7916	8.59941e-05	0.000230716	4	218772|20182|13555|18033
KEGG	mmu03320	PPAR signaling pathway	4|54	85|7916	8.59941e-05	0.000230716	4	19015|19016|20182|19013
KEGG	mmu04911	Insulin secretion	4|54	86|7916	8.98165e-05	0.000235234	4	26427|11909|12915|208647
KEGG	mmu04620	Toll-like receptor signaling pathway	4|54	101|7916	0.000163132	0.000417314	4	54123|14281|20846|18033
KEGG	mmu04660	T cell receptor signaling pathway	4|54	105|7916	0.000188363	0.000470907	4	18018|14281|18033|18021
KEGG	mmu05034	Alcoholism	5|54	204|7916	0.000215699	0.000527265	5	26427|14282|11909|12915|208647
KEGG	mmu04151	PI3K-Akt signaling pathway	6|54	350|7916	0.000331844	0.000793541	6	12915|56484|208647|18033|26427|11909
KEGG	mmu05169	Epstein-Barr virus infection	5|54	232|7916	0.000384328	0.000899492	5	20848|11909|19664|20375|18033
KEGG	mmu04010	MAPK signaling pathway	5|54	254|7916	0.000575032	0.00131778	5	11909|18018|14281|18033|18021
KEGG	mmu05140	Leishmaniasis	3|54	67|7916	0.000804104	0.00180513	3	14281|20846|18033
KEGG	mmu05016	Huntington's disease	4|54	199|7916	0.00193358	0.00425388	4	26427|72504|19016|208647
KEGG	mmu05216	Thyroid cancer	2|54	29|7916	0.0029172	0.006292	2	19016|20182
KEGG	mmu04710	Circadian rhythm	2|54	31|7916	0.00330134	0.00696227	2	217166|19885
KEGG	mmu04725	Cholinergic synapse	3|54	113|7916	0.00341784	0.00696227	3	26427|14281|208647
KEGG	mmu05145	Toxoplasmosis	3|54	113|7916	0.00341784	0.00696227	3	20848|20846|18033
KEGG	mmu04962	Vasopressin-regulated water reabsorption	2|54	43|7916	0.00606685	0.0121337	2	26427|208647
KEGG	mmu04310	Wnt signaling pathway	3|54	146|7916	0.00685352	0.0134623	3	19015|18018|18021
KEGG	mmu04932	Non-alcoholic fatty liver disease (NAFLD)	3|54	157|7916	0.00832717	0.0160631	3	12606|18033|19013
KEGG	mmu04921	Oxytocin signaling pathway	3|54	158|7916	0.00846963	0.0160631	3	18018|14281|18021
KEGG	mmu05134	Legionellosis	2|54	58|7916	0.0105784	0.0197224	2	15499|18033
KEGG	mmu04623	Cytosolic DNA-sensing pathway	2|54	64|7916	0.012692	0.0228872	2	54123|18033
KEGG	mmu04213	Longevity regulating pathway - multiple species	2|54	64|7916	0.012692	0.0228872	2	56458|56484
KEGG	mmu04622	RIG-I-like receptor signaling pathway	2|54	69|7916	0.0145819	0.0258711	2	54123|18033
KEGG	mmu05133	Pertussis	2|54	74|7916	0.0165852	0.0289582	2	14281|18033
KEGG	mmu05132	Salmonella infection	2|54	78|7916	0.0182673	0.031397	2	14281|18033
KEGG	mmu01521	EGFR tyrosine kinase inhibitor resistance	2|54	82|7916	0.0200185	0.0338774	2	20848|56484
KEGG	mmu04012	ErbB signaling pathway	2|54	87|7916	0.022302	0.03717	2	20850|20851
KEGG	mmu04014	Ras signaling pathway	3|54	231|7916	0.0228724	0.0375517	3	23872|54601|18033
KEGG	mmu01522	Endocrine resistance	2|54	95|7916	0.0261672	0.0423293	2	14281|13555
KEGG	mmu04916	Melanogenesis	2|54	99|7916	0.0281943	0.0449474	2	26427|208647
KEGG	mmu05142	Chagas disease (American trypanosomiasis)	2|54	104|7916	0.0308138	0.0484216	2	14281|18033

## Sheet: HyperTH vs HypoTH
Category	ID	Description	GeneRatio	BgRatio	pvalue	padj	Count	geneID
KEGG	mmu05161	Hepatitis B	29|99	146|7916	4.50902e-36	6.35772e-34	29	20848|73181|20847|20846|17128|208647|18033|18019|18018|54131|22059|12675|13712|11911|328572|20850|20851|20852|12912|12913|12914|12915|54123|18021|26427|13557|13555|14281|11909
KEGG	mmu05166	HTLV-I infection	30|99	295|7916	2.04121e-29	1.43905e-27	30	73181|18034|17128|18033|18019|18018|17126|19698|22059|23872|23871|12675|13712|20375|13714|11911|11910|328572|20850|20851|22433|12912|12914|18021|100040260|13557|13555|14281|11908|11909
KEGG	mmu05202	Transcriptional misregulation in cancer	23|99	180|7916	8.31105e-25	3.90619e-23	23	14011|19696|18033|22059|13207|19016|12395|20375|13714|19401|14009|13876|18124|18109|12606|104156|20182|20183|20181|100040260|56458|18514|11908
KEGG	mmu05200	Pathways in cancer	26|99	398|7916	4.85568e-21	1.71163e-19	26	20848|20846|18034|17128|18033|17126|22059|19015|19016|12675|12395|20375|14281|20850|20851|19401|218772|12914|12606|20182|20183|20181|13557|13555|328572|56458
KEGG	mmu05203	Viral carcinogenesis	21|99	245|7916	1.99942e-19	5.63835e-18	21	11911|20848|12912|18033|54123|11909|12913|12914|12915|19696|18034|22059|328572|20850|208647|71609|16391|26427|19664|54131|20851
KEGG	mmu04380	Osteoclast differentiation	15|99	133|7916	7.93478e-16	1.86467e-14	15	19016|14281|12675|20375|12912|20847|20846|16478|14282|18034|16391|18033|18019|18018|19698
KEGG	mmu05215	Prostate cancer	13|99	89|7916	3.3616e-15	6.77123e-14	13	12675|12914|12912|12913|13557|13555|11911|328572|208647|18033|26427|22059|56458
KEGG	mmu04919	Thyroid hormone signaling pathway	13|99	117|7916	8.36056e-14	1.47355e-12	13	20182|20183|20181|14463|17977|12914|21834|20846|328572|56458|22059|21833|17978
KEGG	mmu04211	Longevity regulating pathway	12|99	96|7916	2.14846e-13	3.36592e-12	12	19016|12912|12913|12915|56484|11911|22059|56458|18033|26427|11909|208647
KEGG	mmu05221	Acute myeloid leukemia	10|99	57|7916	1.07868e-12	1.52094e-11	10	19015|20848|12675|12395|20375|20850|19401|18033|12606|20851
KEGG	mmu04022	cGMP-PKG signaling pathway	13|99	173|7916	8.42688e-12	1.04775e-10	13	18018|140781|14463|12912|73181|12915|11911|208647|12913|18021|26427|18019|11909
KEGG	mmu04922	Glucagon signaling pathway	11|99	102|7916	9.59234e-12	1.04775e-10	11	19013|103988|12912|12913|12914|11911|328572|208647|26427|11909|56458
KEGG	mmu05160	Hepatitis C	12|99	137|7916	1.0292e-11	1.04775e-10	12	20848|18033|20181|12675|19013|20847|20846|54123|16391|71609|54131|22059
KEGG	mmu05030	Cocaine addiction	9|99	49|7916	1.04032e-11	1.04775e-10	9	11911|12912|12913|12915|14282|208647|18033|26427|11909
KEGG	mmu04668	TNF signaling pathway	11|99	112|7916	2.43856e-11	2.29225e-10	11	18033|12675|12912|12913|12915|11911|14281|208647|71609|26427|11909
KEGG	mmu04925	Aldosterone synthesis and secretion	10|99	86|7916	4.34738e-11	3.83113e-10	10	100040260|15370|12912|12913|12915|11911|208647|26427|11908|11909
KEGG	mmu04010	MAPK signaling pathway	14|99	254|7916	6.49239e-11	5.38486e-10	14	11909|12675|15370|13712|13714|16478|11911|18034|14281|18033|18021|18018|19698|22059
KEGG	mmu05212	Pancreatic cancer	9|99	66|7916	1.14338e-10	8.95644e-10	9	20848|12675|13557|20846|13555|17128|18033|17126|22059
KEGG	mmu05031	Amphetamine addiction	9|99	68|7916	1.45648e-10	1.08086e-09	9	11911|12912|12913|12915|14282|14281|208647|26427|11909
KEGG	mmu05162	Measles	11|99	139|7916	2.10388e-10	1.48323e-09	11	20848|12675|20847|20846|54123|16391|20850|20851|18033|54131|22059
KEGG	mmu05169	Epstein-Barr virus infection	13|99	232|7916	2.62651e-10	1.76351e-09	13	20848|18033|12675|12914|11909|20375|18034|328572|71609|19664|54131|19698|22059
KEGG	mmu05222	Small cell lung cancer	9|99	85|7916	8.94921e-10	5.56644e-09	9	218772|20182|20183|20181|12675|13557|13555|18033|22059
KEGG	mmu05223	Non-small cell lung cancer	8|99	56|7916	9.08001e-10	5.56644e-09	8	218772|20182|20183|20181|13557|13555|56484|22059
KEGG	mmu04110	Cell cycle	10|99	125|7916	1.29004e-09	7.45374e-09	10	13559|211586|13557|13555|17128|328572|12914|21781|17126|22059
KEGG	mmu05321	Inflammatory bowel disease (IBD)	8|99	59|7916	1.32159e-09	7.45374e-09	8	20848|20852|19883|20846|19885|18033|18018|17126
KEGG	mmu05168	Herpes simplex infection	12|99	224|7916	2.11334e-09	1.14608e-08	12	14281|12675|12914|20847|20846|54123|72504|328572|18033|16391|54131|22059
KEGG	mmu04068	FoxO signaling pathway	10|99	135|7916	2.59004e-09	1.35257e-08	10	20848|12675|54601|12914|17128|56484|329934|328572|56458|17126
KEGG	mmu04933	AGE-RAGE signaling pathway in diabetic complications	9|99	103|7916	4.29026e-09	2.16045e-08	9	20848|20846|17128|20850|56458|18033|18018|17126|20851
KEGG	mmu04920	Adipocytokine signaling pathway	8|99	73|7916	6.15205e-09	2.89146e-08	8	20848|20182|20183|20181|12675|18033|19013|71609
KEGG	mmu05220	Chronic myeloid leukemia	8|99	73|7916	6.15205e-09	2.89146e-08	8	12675|13557|13555|17128|20850|20851|18033|22059
KEGG	mmu04917	Prolactin signaling pathway	8|99	74|7916	6.78912e-09	3.08795e-08	8	20848|103988|20846|56484|14281|20850|20851|18033
KEGG	mmu04350	TGF-beta signaling pathway	8|99	85|7916	1.85401e-08	8.16925e-08	8	13559|12914|21781|17128|328572|17131|17126|17129
KEGG	mmu04911	Insulin secretion	8|99	86|7916	2.01816e-08	8.62303e-08	8	103988|12912|12913|12915|11911|208647|26427|11909
KEGG	mmu04151	PI3K-Akt signaling pathway	13|99	350|7916	2.95393e-08	1.22501e-07	13	20181|12675|15370|12912|12913|12915|56484|11911|208647|18033|26427|11909|22059
KEGG	mmu04915	Estrogen signaling pathway	8|99	98|7916	5.2042e-08	2.09655e-07	8	12912|12913|12915|11911|14281|208647|26427|11909
KEGG	mmu04310	Wnt signaling pathway	9|99	146|7916	7.3384e-08	2.87421e-07	9	19015|73181|12914|17128|328572|18021|18019|18018|22059
KEGG	mmu04024	cAMP signaling pathway	10|99	198|7916	8.10407e-08	3.08831e-07	10	12913|14281|12912|19013|12914|328572|208647|18033|26427|18018
KEGG	mmu04918	Thyroid hormone synthesis	7|99	71|7916	1.09698e-07	4.07038e-07	7	12912|12913|12915|11911|208647|26427|11909
KEGG	mmu04931	Insulin resistance	8|99	111|7916	1.28285e-07	4.63801e-07	8	20848|19013|12912|12913|208647|18033|26427|56458
KEGG	mmu04630	Jak-STAT signaling pathway	9|99	161|7916	1.61769e-07	5.70236e-07	9	20848|12914|20847|20846|328572|20850|20851|20852|16391
KEGG	mmu05164	Influenza A	9|99	172|7916	2.75396e-07	9.47092e-07	9	20847|12914|20846|54123|328572|18033|16391|11909|54131
KEGG	mmu05152	Tuberculosis	9|99	179|7916	3.79318e-07	1.27342e-06	9	18044|18033|12912|56632|12914|20846|328572|71609|12611
KEGG	mmu04728	Dopaminergic synapse	8|99	135|7916	5.26595e-07	1.72674e-06	8	12912|12913|12915|11911|14281|208647|26427|11909
KEGG	mmu05216	Thyroid cancer	5|99	29|7916	6.24162e-07	2.00016e-06	5	19016|22059|20182|20183|20181
KEGG	mmu05016	Huntington's disease	9|99	199|7916	8.83971e-07	2.76978e-06	9	19016|12912|12913|12914|72504|328572|208647|26427|22059
KEGG	mmu04261	Adrenergic signaling in cardiomyocytes	8|99	152|7916	1.23243e-06	3.77765e-06	8	140781|12912|12913|12915|11911|208647|26427|11909
KEGG	mmu04662	B cell receptor signaling pathway	6|99	75|7916	2.84376e-06	8.53129e-06	6	12675|14281|18033|18021|18019|18018
KEGG	mmu04152	AMPK signaling pathway	7|99	129|7916	4.78666e-06	1.40608e-05	7	19016|12912|12913|56484|208647|26427|56458
KEGG	mmu03320	PPAR signaling pathway	6|99	85|7916	5.61154e-06	1.61475e-05	6	19015|19016|20182|20183|19013|20181
KEGG	mmu05034	Alcoholism	8|99	204|7916	9.88524e-06	2.78764e-05	8	11911|12912|12913|12915|14282|208647|26427|11909
KEGG	mmu04916	Melanogenesis	6|99	99|7916	1.28107e-05	3.54177e-05	6	12912|12913|12914|328572|208647|26427
KEGG	mmu04620	Toll-like receptor signaling pathway	6|99	101|7916	1.42714e-05	3.86975e-05	6	12675|20846|54123|14281|18033|54131
KEGG	mmu04660	T cell receptor signaling pathway	6|99	105|7916	1.75967e-05	4.68138e-05	6	12675|14281|18033|18021|18019|18018
KEGG	mmu04710	Circadian rhythm	4|99	31|7916	2.47127e-05	6.45275e-05	4	19883|217166|12912|19885
KEGG	mmu04725	Cholinergic synapse	6|99	113|7916	2.61199e-05	6.69618e-05	6	12912|12913|11911|14281|208647|26427
KEGG	mmu04622	RIG-I-like receptor signaling pathway	5|99	69|7916	3.08959e-05	7.77916e-05	5	12675|54123|18033|54131|71609
KEGG	mmu04722	Neurotrophin signaling pathway	6|99	122|7916	3.93832e-05	9.74216e-05	6	170936|56484|11911|65020|18033|22059
KEGG	mmu04062	Chemokine signaling pathway	7|99	198|7916	6.74909e-05	0.000164073	7	20848|12675|20847|20846|56484|20851|18033
KEGG	mmu04210	Apoptosis	6|99	139|7916	7.88756e-05	0.000188499	6	71609|12675|11911|14281|18033|22059
KEGG	mmu04962	Vasopressin-regulated water reabsorption	4|99	43|7916	8.04541e-05	0.000189067	4	26427|12912|12913|208647
KEGG	mmu04330	Notch signaling pathway	4|99	49|7916	0.000129127	0.000298475	4	328572|12914|19664|433586
KEGG	mmu04932	Non-alcoholic fatty liver disease (NAFLD)	6|99	157|7916	0.0001499	0.000340902	6	22433|19013|20181|11911|18033|12606
KEGG	mmu04921	Oxytocin signaling pathway	6|99	158|7916	0.000154974	0.000346847	6	73181|13712|14281|18021|18019|18018
KEGG	mmu04014	Ras signaling pathway	7|99	231|7916	0.000170356	0.000375316	7	23872|23871|54601|12675|13712|19696|18033
KEGG	mmu04064	NF-kappa B signaling pathway	5|99	104|7916	0.000195476	0.000424033	5	12675|18034|18033|19698|71609
KEGG	mmu04623	Cytosolic DNA-sensing pathway	4|99	64|7916	0.000339397	0.000714253	4	12675|54123|54131|18033
KEGG	mmu05210	Colorectal cancer	4|99	64|7916	0.000339397	0.000714253	4	17128|14281|17126|22059
KEGG	mmu04320	Dorso-ventral axis formation	3|99	26|7916	0.00037124	0.000769778	3	23872|23871|14011
KEGG	mmu05140	Leishmaniasis	4|99	67|7916	0.000400388	0.000818184	4	13712|20846|18033|14281
KEGG	mmu05206	MicroRNAs in cancer	7|99	281|7916	0.000537337	0.00108235	7	20848|13557|12914|13555|328572|18033|22059
KEGG	mmu05133	Pertussis	4|99	74|7916	0.000572535	0.00112121	4	18033|14281|54131|15900
KEGG	mmu04520	Adherens junction	4|99	74|7916	0.000572535	0.00112121	4	12914|17128|328572|17126
KEGG	mmu04390	Hippo signaling pathway	5|99	154|7916	0.00109507	0.00211513	5	17131|21676|17128|17126|21677
KEGG	mmu05219	Bladder cancer	3|99	41|7916	0.00127577	0.00243085	3	13557|13555|22059
KEGG	mmu01522	Endocrine resistance	4|99	95|7916	0.00139651	0.00262544	4	14281|13557|13555|22059
KEGG	mmu05142	Chagas disease (American trypanosomiasis)	4|99	104|7916	0.00192228	0.00356634	4	12675|14281|17126|18033
KEGG	mmu04066	HIF-1 signaling pathway	4|99	110|7916	0.00234046	0.00428577	4	20848|328572|12914|18033
KEGG	mmu05213	Endometrial cancer	3|99	52|7916	0.00243063	0.00439382	3	13712|56484|22059
KEGG	mmu05145	Toxoplasmosis	4|99	113|7916	0.00257133	0.00458933	4	12675|20848|20846|18033
KEGG	mmu05134	Legionellosis	3|99	58|7916	0.00326445	0.0057536	3	18034|15499|18033
KEGG	mmu04071	Sphingolipid signaling pathway	4|99	125|7916	0.00365127	0.00635592	4	56632|18033|71609|22059
KEGG	mmu05205	Proteoglycans in cancer	5|99	208|7916	0.00389787	0.00670244	5	13207|20848|17126|13712|22059
KEGG	mmu05214	Glioma	3|99	65|7916	0.00443485	0.0075339	3	13557|13555|22059
KEGG	mmu04720	Long-term potentiation	3|99	66|7916	0.00462012	0.00775519	3	11911|328572|12914
KEGG	mmu05211	Renal cell carcinoma	3|99	68|7916	0.00500455	0.00830166	3	23871|328572|12914
KEGG	mmu04550	Signaling pathways regulating pluripotency of stem cells	4|99	140|7916	0.00538801	0.00883383	4	17129|17128|20848|17126
KEGG	mmu05218	Melanoma	3|99	72|7916	0.00582986	0.00944839	3	13557|13555|22059
KEGG	mmu04392	Hippo signaling pathway -multiple species	2|99	26|7916	0.00810336	0.0129838	2	21677|21676
KEGG	mmu04012	ErbB signaling pathway	3|99	87|7916	0.0096221	0.015244	3	13712|20850|20851
KEGG	mmu04141	Protein processing in endoplasmic reticulum	4|99	167|7916	0.0097581	0.0152877	4	11911|226641|12915|22433
KEGG	mmu00524	Butirosin and neomycin biosynthesis	1|99	5|7916	0.0286832	0.0444432	1	103988
