# Supplementary material for: Novel Transcriptomic Interactomes of Noncoding RNAs in the Heart under Altered Thyroid Hormonal States
Source: Int J Mol Sci. 2023 Mar 31;24(7):6560. doi: 10.3390/ijms24076560 (PMC10095585; doi:10.3390/ijms24076560)
Supplement: Supplementary file 1 [file ijms-24-06560-s001.zip › Supplemental File S4 LncRNA_AllGroups_AlternativeSplicing.xlsx]

## Sheet: HypoTHvC_A3SS
HypoTH v/s Control_A3SS.TargetAndJunctionCount
ID	GeneID	geneSymbol	chr	strand	longExonStart_0base	longExonEnd	shortES	shortEE	flankingES	flankingEE	ID	IC_SAMPLE_1	SC_SAMPLE_1	IC_SAMPLE_2	SC_SAMPLE_2	IncFormLen	SkipFormLen	PValue	FDR	IncLevel1	IncLevel2	IncLevelDifference
10147	22004	Tpm2	NC_000070.7	-	43513725	43516003	43513725	43514861	43518229	43518299	10147	159149164	49,82,63	50,35,56	62,77,75	1291	149	2.6911e-190	1.56299e-186	0.272,0.173,0.231	0.085,0.05,0.079	0.154
1551	20684	Sp100	NC_000067.7	+	85634557	85634675	85634560	85634675	85632663	85632779	1551	8,14,20	0,3,0	9,16,15	8,5,10	152	149	8.69126e-109	2.52394e-105	1.0,0.821,1.0	0.524,0.758,0.595	0.315
4956	15388	Hnrnpl	NC_000073.7	+	28516759	28517957	28517885	28517957	28514704	28514777	4956	7488971011	125302359	486467541	309248301	1275	149	2.69132e-105	5.2104e-102	0.412,0.258,0.248	0.155,0.18,0.174	0.136
5257	14158	Fer	NC_000083.7	+	64288474	64288616	64288477	64288616	64280059	64280152	5257	36,49,46	10,14,16	41,19,24	29,18,38	152	149	1.4405e-104	2.09161e-101	0.779,0.774,0.738	0.581,0.509,0.382	0.273
3207	71529	Kazn	NC_000070.7	-	141874328	141874459	141874328	141874456	141878156	141878346	3207	0,6,4	0,0,3	0,0,2	1,4,7	152	149	1.40904e-98	1.63674e-95	NA,1.0,0.567	0.0,0.0,0.219	0.711
9903	269003	Sap130	NC_000084.7	+	31815059	31815237	31815062	31815237	31813421	31813724	9903	8,21,31	5,32,16	8,7,4	32,14,22	152	149	7.66001e-95	7.41489e-92	0.611,0.391,0.655	0.197,0.329,0.151	0.327
4712	57773	Wdr4	NC_000083.7	-	31722483	31722701	31722483	31722640	31728794	31728886	4712	2,4,3	8,0,0	0,4,2	1,0,0	210	149	1.31492e-94	1.091e-91	0.151,1.0,1.0	0.0,1.0,1.0	0.05
10352	72739	Zkscan3	NC_000079.7	-	21580269	21580747	21580269	21580744	21586841	21586925	10352	13,15,22	4,6,5	12,11,8	14,10,20	152	149	1.65264e-93	1.19982e-90	0.761,0.71,0.812	0.457,0.519,0.282	0.342
5629	26432	Plod2	NC_000075.7	+	92475387	92475923	92475797	92475923	92473352	92473454	5629	86,46,59	43,47,45	37,12,35	48,42,82	559	149	3.46721e-92	2.23751e-89	0.348,0.207,0.259	0.17,0.071,0.102	0.157
4986	170707	Usp48	NC_000070.7	+	137361465	137362319	137362208	137362319	137361143	137361205	4986	67,82,74	23,23,23	43,42,47	46,29,39	892	149	6.3073e-86	3.66328e-83	0.327,0.373,0.35	0.135,0.195,0.168	0.184
3076	19317	Qk	NC_000083.7	-	10432287	10434403	10432287	10433123	10435088	10435388	3076	175013121492	171448297	11849521309	395368466	1429	149	2.55773e-78	1.35048e-75	0.516,0.234,0.344	0.238,0.212,0.227	0.139
6168	20411	Sorbs1	NC_000085.7	-	40287906	40288097	40287906	40287965	40298024	40298777	6168	105118155	100,99,157	133120186	69,71,65	281	149	2.6665e-77	1.29059e-74	0.358,0.387,0.344	0.505,0.473,0.603	-0.164
4745	77683	Ehmt1	NC_000068.8	-	24753783	24753941	24753783	24753920	24767466	24767638	4745	3,18,12	18,58,47	18,26,29	52,0,38	170	149	2.70566e-76	1.20881e-73	0.127,0.214,0.183	0.233,1.0,0.401	-0.37
8699	13400	Dmpk	NC_000073.7	+	18826342	18826557	18826467	18826557	18825863	18825961	8699	36,48,73	17,5,11	74,63,75	1,4,5	274	149	1.22683e-73	5.08957e-71	0.535,0.839,0.783	0.976,0.895,0.891	-0.202
9236	50767	Pnpla6	NC_000074.7	+	3566506	3566568	3566509	3566568	3565340	3565556	9236	5,1,2	5,0,4	2,2,3	0,0,2	152	149	7.80424e-73	3.0218e-70	0.495,1.0,0.329	1.0,1.0,0.595	-0.257
7298	66118	Sarnp	NC_000076.7	+	128674312	128674359	128674315	128674359	128669180	128669280	7298	5,6,20	7,1,19	2,0,12	0,0,2	152	149	2.24846e-72	8.16191e-70	0.412,0.855,0.508	1.0,NA,0.855	-0.336
5759	66408	Aptx	NC_000070.7	-	40695376	40695423	40695376	40695418	40697216	40697353	5759	5,38,40	4,12,5	29,43,45	1,1,2	154	149	8.18583e-71	2.79666e-68	0.547,0.754,0.886	0.966,0.977,0.956	-0.237
1195	234699	Edc4	NC_000074.7	+	106615227	106615387	106615230	106615387	106615019	106615150	1195	8,16,9	40,30,27	25,8,21	21,9,20	152	149	6.32875e-70	2.04208e-67	0.164,0.343,0.246	0.539,0.466,0.507	-0.253
8484	75956	Srrm2	NC_000083.7	+	24042021	24042878	24042764	24042878	24041386	24041674	8484	256466526	47163141	300246279	140140144	892	149	9.44784e-70	2.88805e-67	0.476,0.323,0.384	0.264,0.227,0.245	0.149
9462	192897	Itgb4	NC_000077.7	+	115880544	115880667	115880547	115880667	115879715	115879845	9462	3,5,1	0,4,2	1,0,0	0,0,3	152	149	4.6502e-69	1.35042e-66	1.0,0.551,0.329	1.0,NA,0.0	0.127
6597	53883	Celsr2	NC_000069.7	-	108298163	108299974	108298163	108299832	108300326	108300561	6597	0,3,5	0,5,4	8,2,15	2,1,1	291	149	1.30564e-67	3.61103e-65	NA,0.235,0.39	0.672,0.506,0.885	-0.375
8483	75956	Srrm2	NC_000083.7	+	24041976	24042878	24042764	24042878	24041386	24041674	8483	296517598	47163141	342275334	140140144	937	149	2.37151e-67	6.26078e-65	0.5,0.335,0.403	0.28,0.238,0.269	0.15
771	16169	Il15ra	NC_000068.8	+	11726005	11728421	11728223	11728421	11724823	11724916	771	374301290	5,16,15	291290354	15,32,40	2367	149	4.52753e-67	1.1433e-64	0.825,0.542,0.549	0.55,0.363,0.358	0.215
10633	56399	Akap8	NC_000083.7	-	32531259	32532236	32531259	32531347	32533084	32533118	10633	291233295	24,57,48	154115171	48,40,55	1038	149	9.89665e-67	2.39499e-64	0.635,0.37,0.469	0.315,0.292,0.309	0.186
1829	13841	Epha7	NC_000070.7	+	28947527	28947653	28947539	28947653	28943322	28943378	1829	4,8,0	0,0,1	2,3,9	1,1,1	161	149	4.45678e-66	1.0354e-63	1.0,1.0,0.0	0.649,0.735,0.893	-0.092
8687	68952	Tlcd3b	NC_000073.7	+	126416288	126416483	126416360	126416483	126416056	126416173	8687	5,8,1	0,3,4	9,6,6	0,0,2	221	149	5.71549e-64	1.27675e-61	1.0,0.643,0.144	1.0,1.0,0.669	-0.294
3205	104771	Jkamp	NC_000078.7	+	72136088	72136180	72136106	72136180	72132612	72132957	3205	41,45,26	3,8,2	36,25,48	8,21,16	167	149	7.60532e-64	1.63599e-61	0.924,0.834,0.921	0.801,0.515,0.728	0.212
508	69228	Zfp746	NC_000072.7	-	48039324	48041886	48039324	48041883	48044102	48044294	508	5,1,1	0,0,2	4,3,1	3,1,4	152	149	1.90261e-62	3.94655e-60	1.0,1.0,0.329	0.567,0.746,0.197	0.273
4975	72507	Dzip1l	NC_000075.7	+	99546234	99547907	99547767	99547907	99545581	99545769	4975	11,29,36	9,5,10	2,8,4	6,11,5	1682	149	2.25541e-61	4.51704e-59	0.098,0.339,0.242	0.029,0.061,0.066	0.174
8616	17258	Mef2a	NC_000073.7	-	66917814	66918148	66917814	66917952	66945122	66945326	8616	258206200	8206187	194146177	174167181	345	149	6.95946e-60	1.34735e-57	0.933,0.302,0.316	0.325,0.274,0.297	0.218
9960	228357	Lrp4	NC_000068.8	+	91316098	91316307	91316129	91316307	91312202	91312325	9960	22,23,30	3,0,12	23,15,19	0,0,2	180	149	1.76673e-59	3.31005e-57	0.859,1.0,0.674	1.0,1.0,0.887	-0.118
714	20353	Sema4c	NC_000067.7	-	36595012	36595161	36595012	36595158	36595577	36595862	714	3,2,1	1,0,2	0,0,2	1,2,0	152	149	5.45993e-57	9.90978e-55	0.746,1.0,0.329	0.0,0.0,1.0	0.358
1125	235626	Setd2	NC_000075.7	+	110421466	110421647	110421469	110421647	110419455	110419504	1125	17,36,34	14,9,19	25,10,18	27,22,19	152	149	8.76607e-55	1.54283e-52	0.543,0.797,0.637	0.476,0.308,0.482	0.237
9574	17686	Msh3	NC_000079.7	-	92372081	92372239	92372081	92372236	92386334	92386446	9574	14,11,18	0,3,2	14,9,11	6,6,6	152	149	9.83118e-55	1.6794e-52	1.0,0.782,0.898	0.696,0.595,0.642	0.249
9899	214290	Tut7	NC_000079.7	-	59926565	59927015	59926565	59926629	59929831	59930157	9899	18,24,16	0,0,10	18,25,35	0,0,3	535	149	1.62159e-54	2.69091e-52	1.0,1.0,0.308	1.0,1.0,0.765	-0.152
1920	71834	Zbtb43	NC_000068.8	-	33354925	33355074	33354925	33354986	33358444	33358544	1920	1,2,0	7,0,13	4,6,1	9,11,7	237	149	3.73662e-53	6.02841e-51	0.082,1.0,0.0	0.218,0.255,0.082	0.176
8698	13400	Dmpk	NC_000073.7	+	18826401	18826557	18826467	18826557	18825863	18825961	8698	15,16,24	17,5,11	17,18,23	1,4,5	215	149	2.35121e-52	3.69077e-50	0.379,0.689,0.602	0.922,0.757,0.761	-0.257
5054	64009	Syne1	NC_000076.7	-	4997530	4997858	4997530	4997714	4998723	4998915	5054	215204178	63,60,42	158139180	19,16,28	293	149	7.23107e-52	1.10521e-49	0.634,0.634,0.683	0.809,0.815,0.766	-0.146
5950	50497	Hspa14	NC_000068.8	-	3509329	3510132	3509329	3510057	3512051	3512134	5950	2,4,5	2,0,0	1,1,4	0,1,5	224	149	1.37375e-51	2.04582e-49	0.399,1.0,1.0	1.0,0.399,0.347	0.218
2968	19730	Ralgds	NC_000068.8	+	28432793	28432962	28432902	28432962	28432301	28432495	2968	5,4,4	17,6,6	11,9,13	13,2,4	258	149	6.2373e-51	9.05656e-49	0.145,0.278,0.278	0.328,0.722,0.652	-0.334
3278	100504653	4930555A03Rik	NC_000069.7	+	151000509	151002487	151001521	151002487	150999798	150999926	3278	3,0,9	0,0,1	12,5,23	7,0,5	1161	149	1.03738e-50	1.46954e-48	1.0,NA,0.536	0.18,1.0,0.371	0.251
6279	54194	Akap8l	NC_000083.7	-	32551976	32553019	32551976	32552118	32553561	32553670	6279	167246270	16,59,47	152105156	40,45,56	1050	149	1.52746e-50	2.11226e-48	0.597,0.372,0.449	0.35,0.249,0.283	0.179
404	226169	Pprc1	NC_000085.7	+	46050579	46050729	46050582	46050729	46049841	46050015	404	13,3,8	36,11,13	2,2,1	16,10,27	152	149	5.46023e-50	7.37511e-48	0.261,0.211,0.376	0.109,0.164,0.035	0.18
9604	19299	Abcd3	NC_000069.7	-	121579650	121581698	121579650	121579720	121585382	121585471	9604	252323372	51,20,25	501494529	13,30,34	2127	149	2.52817e-49	3.33718e-47	0.257,0.531,0.51	0.73,0.536,0.522	-0.163
10267	218461	Pde8b	NC_000079.7	-	95259771	95259831	95259771	95259828	95358982	95359637	10267	7,3,0	3,3,0	6,0,2	0,1,1	152	149	1.33669e-48	1.72523e-46	0.696,0.495,NA	1.0,0.0,0.662	0.041
2967	19730	Ralgds	NC_000068.8	+	28432863	28432962	28432902	28432962	28432301	28432495	2967	5,4,4	17,6,6	10,9,12	13,2,4	188	149	1.17335e-46	1.48148e-44	0.189,0.346,0.346	0.379,0.781,0.704	-0.328
7719	192651	Zfp286	NC_000077.7	-	62669212	62671910	62669212	62671725	62674497	62674587	7719	1,0,2	4,0,5	0,0,3	1,0,0	334	149	1.31474e-46	1.62469e-44	0.1,NA,0.151	0.0,NA,1.0	-0.374
8855	225898	Eml3	NC_000085.7	+	8908407	8908668	8908410	8908668	8908162	8908334	8855	20,12,11	13,3,9	5,1,7	9,9,8	152	149	4.94944e-45	5.98882e-43	0.601,0.797,0.545	0.353,0.098,0.462	0.343
5701	66128	Mrps36	NC_000079.7	-	100875521	100875709	100875521	100875703	100881037	100881167	5701	7,40,31	0,2,0	41,13,30	0,16,0	155	149	8.11865e-45	9.62308e-43	1.0,0.951,1.0	1.0,0.439,1.0	0.171
10488	76686	Clip3	NC_000073.7	+	29991566	29991791	29991602	29991791	29991119	29991267	10488	0,17,16	0,0,4	6,6,1	1,1,6	185	149	1.1871e-44	1.37893e-42	NA,1.0,0.763	0.829,0.829,0.118	0.289
1429	102637289	Gm34140	NC_000073.7	-	67364340	67364732	67364340	67364390	67365885	67367078	1429	6,11,15	5,3,0	3,5,7	1,0,0	491	149	1.27808e-44	1.4555e-42	0.267,0.527,1.0	0.477,1.0,1.0	-0.228
4969	68294	Mfsd10	NC_000071.7	-	34793937	34794130	34793937	34794127	34794270	34794557	4969	1,6,3	10,7,18	0,2,0	2,13,16	152	149	4.73258e-43	5.28592e-41	0.089,0.457,0.14	0.0,0.131,0.0	0.185
1261	18551	Pcsk4	NC_000076.7	-	80158557	80159040	80158557	80159009	80159506	80159610	1261	0,1,5	2,0,4	0,0,1	1,0,0	180	149	5.71256e-42	6.2601e-40	0.0,1.0,0.509	0.0,NA,1.0	0.003
9114	213498	Arhgef11	NC_000069.7	+	87624727	87624827	87624730	87624827	87624336	87624481	9114	5,28,8	4,24,27	29,17,23	13,7,16	152	149	7.85439e-42	8.44784e-40	0.551,0.534,0.225	0.686,0.704,0.585	-0.222
5331	16348	Invs	NC_000070.7	+	48427607	48431956	48429604	48431956	48427033	48427108	5331	19,16,21	3,0,0	11,7,9	1,4,4	2146	149	9.02656e-42	9.53205e-40	0.305,1.0,1.0	0.433,0.108,0.135	0.543
4984	170707	Usp48	NC_000070.7	+	137365070	137365201	137365075	137365201	137362208	137362319	4984	13,23,21	9,10,1	26,17,29	4,1,0	154	149	1.10956e-41	1.15077e-39	0.583,0.69,0.953	0.863,0.943,1.0	-0.193
9994	22678	Zfp2	NC_000077.7	-	50803106	50803231	50803106	50803228	50806935	50807003	9994	0,2,2	0,2,11	3,3,5	4,2,2	152	149	5.30007e-41	5.40049e-39	NA,0.495,0.151	0.424,0.595,0.71	-0.253
1339	214855	Arid5a	NC_000067.7	+	36355289	36355408	36355292	36355408	36346813	36346917	1339	17,30,8	1,0,0	9,23,24	2,7,5	152	149	8.13758e-41	8.14881e-39	0.943,1.0,1.0	0.815,0.763,0.825	0.18
10276	12633	Cflar	NC_000067.7	+	58752454	58753048	58752729	58753048	58750649	58750751	10276	102,114,80	10,33,7	67,70,80	21,30,25	424	149	8.3184e-41	8.18869e-39	0.782,0.548,0.801	0.529,0.451,0.529	0.207
7517	224440	Setd4	NC_000082.7	-	93386586	93387226	93386586	93386973	93387761	93388191	7517	10,1,7	2,2,3	0,4,0	1,0,0	402	149	1.65009e-40	1.59729e-38	0.65,0.156,0.464	0.0,1.0,NA	-0.077
9662	70425	Csnk1g3	NC_000084.7	+	54065262	54065411	54065265	54065411	54063349	54063434	9662	41,0,9	31,7,9	0,4,0	4,7,13	152	149	2.01502e-39	1.91856e-37	0.565,0.0,0.495	0.0,0.359,0.0	0.234
10154	243905	Zfp568	NC_000073.7	+	29713264	29713314	29713267	29713314	29697539	29697635	10154	41,11,11	0,12,1	12,11,18	6,11,11	152	149	1.66388e-38	1.55868e-36	1.0,0.473,0.915	0.662,0.495,0.616	0.205
9365	268747	Carmil3	NC_000080.7	+	55744833	55745014	55744839	55745014	55744574	55744693	9365	0,2,7	8,1,6	1,2,4	3,0,0	155	149	2.49792e-38	2.30284e-36	0.0,0.658,0.529	0.243,1.0,1.0	-0.352
636	67429	Nudcd1	NC_000081.7	-	44263415	44263623	44263415	44263620	44264677	44264860	636	1,8,4	14,17,9	15,7,4	7,6,5	152	149	5.04896e-38	4.58193e-36	0.065,0.316,0.303	0.677,0.534,0.44	-0.322
6972	333088	Kcp	NC_000072.7	-	29489031	29489271	29489031	29489149	29490064	29490147	6972	2,0,2	0,2,1	0,1,1	0,1,0	271	149	1.26165e-37	1.12733e-35	1.0,0.0,0.524	NA,0.355,1.0	-0.169
187	329650	Med12l	NC_000069.7	+	59152173	59152401	59152176	59152401	59148009	59148141	187	5,6,7	1,3,3	7,0,4	11,3,7	152	149	2.22201e-37	1.95537e-35	0.831,0.662,0.696	0.384,0.0,0.359	0.482
815	108011	Ap4e1	NC_000068.8	+	126879613	126879779	126879705	126879779	126876963	126877130	815	11,3,6	16,24,17	2,0,2	13,12,27	241	149	5.87037e-37	5.08883e-35	0.298,0.072,0.179	0.087,0.0,0.044	0.139
2964	19730	Ralgds	NC_000068.8	+	28432866	28432962	28432902	28432962	28432301	28432495	2964	6,5,7	17,6,6	13,13,12	13,2,4	185	149	1.45188e-36	1.24007e-34	0.221,0.402,0.484	0.446,0.84,0.707	-0.295
3617	232339	Ankrd26	NC_000072.7	-	118525790	118526230	118525790	118525920	118526346	118526498	3617	3,5,8	8,11,12	0,0,2	6,7,3	459	149	2.32556e-36	1.95751e-34	0.109,0.129,0.178	0.0,0.0,0.178	0.079
10490	76686	Clip3	NC_000073.7	+	29991579	29991791	29991602	29991791	29991119	29991267	10490	0,14,16	0,0,4	6,7,1	1,1,6	172	149	7.54344e-36	6.2589e-34	NA,1.0,0.776	0.839,0.858,0.126	0.28
7825	101604	E430018J23Rik	NC_000073.7	-	126992172	126992286	126992172	126992283	126992461	126992834	7825	2,1,5	0,3,0	0,2,0	0,0,1	152	149	1.42307e-35	1.16411e-33	1.0,0.246,1.0	NA,1.0,0.0	0.249
1465	224139	Golgb1	NC_000082.7	+	36706492	36706590	36706495	36706590	36695454	36695625	1465	0,13,1	0,7,0	0,0,7	1,5,11	152	149	2.79396e-35	2.2538e-33	NA,0.645,1.0	0.0,0.0,0.384	0.695
6671	320204	Etfbkmt	NC_000072.7	+	149045531	149048786	149048655	149048786	149044103	149044213	6671	235267312	0,4,2	335376320	5,12,5	3273	149	1.01047e-34	8.0395e-33	1.0,0.752,0.877	0.753,0.588,0.744	0.181
6059	56210	Rev1	NC_000067.7	-	38118370	38118479	38118370	38118476	38120239	38120439	6059	0,1,3	1,0,0	0,1,2	2,0,2	152	149	2.34858e-34	1.84332e-32	0.0,1.0,1.0	0.0,1.0,0.495	0.168
7651	68048	Aen	NC_000073.7	+	78551977	78552578	78552091	78552578	78545674	78545762	7651	29,15,15	4,6,10	15,25,17	5,25,20	263	149	1.26345e-33	9.78414e-32	0.804,0.586,0.459	0.63,0.362,0.325	0.177
7925	78266	Zfp687	NC_000069.7	-	94906140	94909519	94906140	94906311	94911533	94915277	7925	60,59,88	5,4,11	65,27,57	2,1,1	3357	149	1.29546e-33	9.90003e-32	0.348,0.396,0.262	0.591,0.545,0.717	-0.282
1422	216892	Spns2	NC_000077.7	-	72344379	72344540	72344379	72344426	72344879	72345043	1422	5,5,2	16,6,9	5,1,5	2,3,0	263	149	2.40197e-33	1.81177e-31	0.15,0.321,0.112	0.586,0.159,1.0	-0.387
4327	67134	Nop56	NC_000068.8	+	130120332	130121228	130120816	130121228	130120075	130120210	4327	30,17,30	0,20,28	18,23,16	35,34,26	633	149	4.53875e-33	3.37962e-31	1.0,0.167,0.201	0.108,0.137,0.127	0.332
3641	74356	4931428F04Rik	NC_000074.7	-	106011887	106012669	106011887	106012501	106015400	106015797	3641	3,1,1	3,0,0	2,0,0	0,0,1	317	149	9.32745e-33	6.85745e-31	0.32,1.0,1.0	1.0,NA,0.0	0.273
4263	235132	Zbtb44	NC_000075.7	+	30975525	30975638	30975528	30975638	30973336	30973421	4263	5,3,4	6,10,4	1,3,0	8,10,2	152	149	3.6561e-32	2.65433e-30	0.45,0.227,0.495	0.109,0.227,0.0	0.279
9332	75710	Rbm12	NC_000068.8	-	155945268	155945349	155945268	155945317	155953705	155953885	9332	22,15,38	16,20,20	29,42,40	8,19,11	181	149	6.38441e-32	4.57786e-30	0.531,0.382,0.61	0.749,0.645,0.75	-0.207
7336	12070	Bex3	NC_000086.8	+	135172011	135172727	135172057	135172727	135171558	135171631	7336	4,23,21	0,4,9	15,6,13	2,1,0	195	149	1.41587e-31	1.00285e-29	1.0,0.815,0.641	0.851,0.821,1.0	-0.072
6660	408066	Cspg4b	NC_000079.7	+	113485444	113488300	113488130	113488300	113483044	113483176	6660	24,31,39	13,9,8	0,5,9	6,6,6	2835	149	2.08259e-31	1.45731e-29	0.088,0.153,0.204	0.0,0.042,0.073	0.11
3955	27393	Mrpl39	NC_000082.7	-	84515168	84516808	84515168	84516370	84517157	84517205	3955	48,75,89	0,3,1	69,67,108	6,0,9	587	149	2.4342e-31	1.68308e-29	1.0,0.864,0.958	0.745,1.0,0.753	0.108
1951	319601	Zfp653	NC_000075.7	-	21968796	21968998	21968796	21968974	21969099	21969711	1951	0,12,6	10,3,8	5,11,6	3,3,2	173	149	1.01179e-30	6.91353e-29	0.0,0.775,0.392	0.589,0.759,0.721	-0.301
3443	18628	Per3	NC_000070.7	-	151102355	151102611	151102355	151102523	151103308	151103444	3443	5,10,3	0,0,1	5,5,13	0,3,3	237	149	1.21773e-30	8.22389e-29	1.0,1.0,0.654	1.0,0.512,0.731	0.137
3150	228730	Kiz	NC_000068.8	+	146792644	146792822	146792647	146792822	146792442	146792508	3150	4,0,0	1,0,2	0,2,2	1,0,0	152	149	3.5184e-30	2.34884e-28	0.797,NA,0.0	0.0,1.0,1.0	-0.268
8152	17312	Clec10a	NC_000077.7	+	70059408	70059522	70059411	70059522	70058642	70058830	8152	3,1,4	3,1,2	2,0,0	6,5,6	152	149	7.95308e-30	5.24903e-28	0.495,0.495,0.662	0.246,0.0,0.0	0.469
10354	69064	Fuom	NC_000073.7	-	139679382	139679619	139679382	139679535	139679791	139679865	10354	28,65,53	0,3,2	68,100,81	13,7,8	233	149	1.05602e-29	6.8914e-28	1.0,0.933,0.944	0.77,0.901,0.866	0.113
6635	108101	Fermt3	NC_000085.7	-	6996033	6996210	6996033	6996207	6996645	6996837	6635	2,2,0	7,5,13	7,7,0	12,4,11	152	149	2.15238e-29	1.389e-27	0.219,0.282,0.0	0.364,0.632,0.0	-0.165
2961	229600	BC028528	NC_000069.7	-	95792281	95792383	95792281	95792380	95795452	95795608	2961	3,5,26	0,7,4	8,9,6	11,3,10	152	149	3.01755e-29	1.92593e-27	1.0,0.412,0.864	0.416,0.746,0.37	0.248
5646	217011	Nle1	NC_000077.7	-	82795065	82795398	82795065	82795201	82795617	82795810	5646	8,9,4	4,9,0	3,3,6	6,7,13	346	149	1.10687e-28	6.98769e-27	0.463,0.301,1.0	0.177,0.156,0.166	0.422
1472	77733	Rnf170	NC_000074.7	+	26610467	26610591	26610472	26610591	26609652	26609987	1472	15,24,27	5,5,4	34,22,27	1,1,2	154	149	2.70645e-28	1.69022e-26	0.744,0.823,0.867	0.97,0.955,0.929	-0.14
8944	11568	Aebp1	NC_000077.7	+	5817094	5817151	5817097	5817151	5816919	5817000	8944	8,20,24	13,13,17	12,5,10	12,15,25	152	149	2.78036e-28	1.71791e-26	0.376,0.601,0.581	0.495,0.246,0.282	0.178
8911	52036	Ppp6r3	NC_000085.7	-	3523768	3523866	3523768	3523815	3534830	3534916	8911	55,47,49	5,4,9	27,23,41	1,2,0	200	149	2.03069e-27	1.2415e-25	0.891,0.897,0.802	0.953,0.895,1.0	-0.086
2288	30050	Fbxw2	NC_000068.8	-	34712569	34713079	34712569	34712987	34715973	34716082	2288	140,98,133	5,18,8	62,92,113	17,13,22	241	149	5.78067e-27	3.4973e-25	0.945,0.771,0.911	0.693,0.814,0.761	0.12
2595	241915	Phc3	NC_000069.7	-	30990100	30990169	30990100	30990148	30990433	30991305	2595	9,3,3	18,9,17	3,12,7	6,10,5	170	149	6.66195e-27	3.98893e-25	0.305,0.226,0.134	0.305,0.513,0.551	-0.235
2454	50793	Orc3	NC_000070.7	-	34577952	34578032	34577952	34578029	34579742	34579876	2454	38,17,37	21,34,21	28,15,17	45,29,25	152	149	7.10866e-27	4.21297e-25	0.639,0.329,0.633	0.379,0.336,0.4	0.162
9610	19731	Rgl1	NC_000067.7	-	152550610	152550777	152550610	152550774	152641657	152642056	9610	15,2,2	0,0,2	3,0,2	1,0,3	152	149	8.78069e-27	5.15134e-25	1.0,1.0,0.495	0.746,NA,0.395	0.261
345	21886	Tle2	NC_000076.7	+	81422688	81422762	81422691	81422762	81422046	81422207	345	5,4,0	9,5,0	4,1,0	0,2,2	152	149	6.70122e-26	3.8863e-24	0.353,0.44,NA	1.0,0.329,0.0	-0.047
4194	105243866	Gm9947	NC_000067.7	+	14845645	14845832	14845749	14845832	14844040	14844161	4194	0,1,4	3,1,0	0,1,1	1,0,0	253	149	6.7582e-26	3.8863e-24	0.0,0.371,1.0	0.0,1.0,1.0	-0.21
900	13591	Ebf1	NC_000077.7	+	44798730	44798864	44798733	44798864	44774640	44774758	900	12,13,6	0,3,0	6,8,12	3,0,9	152	149	8.03621e-26	4.57591e-24	1.0,0.809,1.0	0.662,1.0,0.567	0.193
5304	234725	Zfp612	NC_000074.7	+	110810238	110810415	110810288	110810415	110810072	110810105	5304	2,4,6	9,1,2	4,11,7	2,0,1	199	149	9.42575e-26	5.31503e-24	0.143,0.75,0.692	0.6,1.0,0.84	-0.285
309	233900	Rnf40	NC_000073.7	+	127190453	127190608	127190471	127190608	127189678	127189885	309	6,3,4	2,0,0	5,4,6	3,1,1	167	149	1.47655e-25	8.24598e-24	0.728,1.0,1.0	0.598,0.781,0.843	0.169
5007	56716	Mlst8	NC_000083.7	-	24697293	24697457	24697293	24697432	24697985	24698052	5007	9,2,2	0,8,4	0,2,3	7,2,6	174	149	2.57671e-25	1.42529e-23	1.0,0.176,0.3	0.0,0.461,0.3	0.238
6057	56210	Rev1	NC_000067.7	-	38113395	38114104	38113395	38113524	38118370	38118476	6057	49,38,37	29,15,16	30,64,61	12,9,15	729	149	8.42377e-25	4.61559e-23	0.257,0.341,0.321	0.338,0.592,0.454	-0.155
2981	99100	Cep152	NC_000068.8	-	125456207	125456348	125456207	125456313	125460292	125460461	2981	0,3,2	7,0,1	2,5,3	2,1,1	184	149	1.40922e-24	7.64927e-23	0.0,1.0,0.618	0.447,0.802,0.708	-0.113
1850	320816	Ankrd16	NC_000068.8	+	11789007	11789263	11789101	11789263	11788451	11788560	1850	3,4,1	35,5,8	2,4,6	3,4,10	243	149	2.26249e-24	1.21671e-22	0.05,0.329,0.071	0.29,0.38,0.269	-0.163
6100	65116	Prrg2	NC_000073.7	-	44709628	44709839	44709628	44709810	44710164	44710316	6100	0,1,4	19,21,6	2,3,7	11,7,12	178	149	4.93923e-24	2.63184e-22	0.0,0.038,0.358	0.132,0.264,0.328	-0.109
3562	71891	Cdadc1	NC_000080.7	-	59796836	59798405	59796836	59798370	59806396	59806457	3562	2,3,0	2,0,3	0,1,1	3,4,0	184	149	5.37007e-24	2.8354e-22	0.447,1.0,0.0	0.0,0.168,1.0	0.093
9273	102634818	Gm32313	NC_000067.7	+	194815060	194821644	194816774	194821644	194813760	194814056	9273	28,13,60	0,0,2	24,23,10	1,1,1	1863	149	1.32052e-23	6.90951e-22	1.0,1.0,0.706	0.657,0.648,0.444	0.319
5213	102638631	Gm35150	NC_000082.7	-	34505259	34505979	34505259	34505500	34507842	34507883	5213	5,4,1	3,0,1	1,0,1	0,0,1	628	149	3.21565e-23	1.66755e-21	0.283,1.0,0.192	1.0,NA,0.192	-0.104
1993	21781	Tfdp1	NC_000074.7	+	13420168	13420274	13420171	13420274	13419458	13419580	1993	2,0,0	0,0,1	1,4,3	0,3,2	152	149	8.58749e-23	4.41382e-21	1.0,NA,0.0	1.0,0.567,0.595	-0.221
4046	69131	Cdk12	NC_000077.7	+	98140535	98154396	98154295	98154396	98136042	98136495	4046	181514071662	5,2,10	12289931266	2,0,3	13909	149	1.59896e-22	8.1463e-21	0.795,0.883,0.64	0.868,1.0,0.819	-0.123
3874	170791	Rbm39	NC_000068.8	-	156014747	156016088	156014747	156014942	156019255	156019305	3874	750767827	50233190	455493545	240244245	1295	149	1.6885e-22	8.52768e-21	0.633,0.275,0.334	0.179,0.189,0.204	0.223
4340	272322	Arntl2	NC_000072.7	+	146722025	146722166	146722101	146722166	146720317	146720432	4340	1,0,2	1,3,2	2,2,2	1,0,3	225	149	2.67463e-22	1.32782e-20	0.398,0.0,0.398	0.57,1.0,0.306	-0.36
5885	56233	Hdac7	NC_000081.7	-	97698575	97699210	97698575	97698683	97699956	97700006	5885	95,83,64	63,32,37	63,50,94	12,28,22	676	149	2.67485e-22	1.32782e-20	0.249,0.364,0.276	0.536,0.282,0.485	-0.138
2863	76614	Immt	NC_000072.7	+	71829746	71829851	71829749	71829851	71828755	71828864	2863	30,24,36	2,3,6	10,20,22	12,5,2	152	149	3.79525e-22	1.86803e-20	0.936,0.887,0.855	0.45,0.797,0.915	0.172
1615	252973	Grhl2	NC_000081.7	+	37344896	37344991	37344899	37344991	37338016	37338048	1615	1,4,0	0,8,1	2,0,3	2,0,0	152	149	4.50302e-22	2.19778e-20	1.0,0.329,0.0	0.495,NA,1.0	-0.305
9323	67285	Cwc27	NC_000079.7	-	104929006	104929167	104929006	104929158	104932917	104932951	9323	0,7,16	0,56,39	5,2,4	40,39,42	158	149	1.75547e-21	8.49648e-20	NA,0.105,0.279	0.105,0.046,0.082	0.114
5661	19682	Rdh5	NC_000076.7	-	128754121	128754466	128754121	128754461	128755015	128755166	5661	0,1,0	0,0,3	0,0,2	0,2,1	154	149	2.06084e-21	9.89205e-20	NA,1.0,0.0	NA,0.0,0.659	0.17
8815	224170	Dzip3	NC_000082.7	-	48744594	48747708	48744594	48746465	48747904	48748006	8815	61,45,68	5,3,3	35,38,40	3,4,10	1392	149	2.49124e-21	1.18599e-19	0.566,0.616,0.708	0.555,0.504,0.3	0.177
4045	69131	Cdk12	NC_000077.7	+	98140508	98154396	98154295	98154396	98136042	98136495	4045	181914011649	5,2,10	12179831280	2,0,3	13936	149	6.91668e-21	3.26602e-19	0.795,0.882,0.638	0.867,1.0,0.82	-0.124
4337	22704	Zfp46	NC_000070.7	+	136014382	136014626	136014499	136014626	136013217	136013792	4337	125,80,84	23,25,30	92,81,90	19,10,9	266	149	7.3771e-21	3.45534e-19	0.753,0.642,0.611	0.731,0.819,0.849	-0.131
5302	19365	Rad52	NC_000072.7	+	119895886	119896038	119895889	119896038	119895547	119895747	5302	9,2,6	3,1,0	6,1,0	0,0,2	152	149	8.20871e-21	3.81409e-19	0.746,0.662,1.0	1.0,1.0,0.0	0.136
4982	170707	Usp48	NC_000070.7	+	137352467	137352598	137352470	137352598	137350584	137350699	4982	13,10,14	38,27,26	0,3,5	28,21,47	152	149	3.40662e-20	1.57029e-18	0.251,0.266,0.345	0.0,0.123,0.094	0.215
2179	55992	Trim3	NC_000073.7	-	105268265	105268435	105268265	105268417	105268589	105268821	2179	0,1,2	14,34,28	9,3,2	32,13,40	167	149	4.11909e-20	1.86904e-18	0.0,0.026,0.06	0.201,0.171,0.043	-0.11
7448	319615	Zfp944	NC_000083.7	-	22577803	22577969	22577803	22577896	22578420	22578505	7448	19,14,11	6,5,4	3,11,17	15,5,5	222	149	4.08749e-20	1.86904e-18	0.68,0.653,0.649	0.118,0.596,0.695	0.191
4040	100041677	Zfp984	NC_000070.7	-	147845677	147845782	147845677	147845735	147880114	147880181	4040	8,15,10	3,4,0	0,4,6	0,0,7	196	149	4.19822e-20	1.89017e-18	0.67,0.74,1.0	NA,1.0,0.395	0.106
10584	19286	Pts	NC_000075.7	-	50438169	50438316	50438169	50438249	50439445	50439532	10584	10,11,9	3,5,9	6,2,14	19,18,35	216	149	5.78993e-20	2.58676e-18	0.697,0.603,0.408	0.179,0.071,0.216	0.414
4812	22693	Zfp30	NC_000073.7	+	29485599	29485728	29485643	29485728	29483392	29484326	4812	9,7,12	10,10,19	2,4,8	19,20,8	193	149	6.24492e-20	2.76874e-18	0.41,0.351,0.328	0.075,0.134,0.436	0.148
8296	80877	Lrba	NC_000069.7	+	86648696	86648889	86648711	86648889	86644388	86644478	8296	6,16,9	38,36,37	18,21,14	37,24,33	164	149	6.29394e-20	2.76933e-18	0.125,0.288,0.181	0.307,0.443,0.278	-0.145
633	101592	Efl1	NC_000073.7	+	82323575	82323790	82323612	82323790	82322017	82322155	633	20,15,29	1,8,6	17,19,16	3,0,0	186	149	7.01349e-20	3.06273e-18	0.941,0.6,0.795	0.819,1.0,1.0	-0.161
7305	269473	Lrig2	NC_000069.7	-	104369974	104370161	104369974	104370124	104371174	104371624	7305	0,2,2	28,16,16	3,3,0	14,5,0	186	149	9.73016e-20	4.21737e-18	0.0,0.091,0.091	0.147,0.325,NA	-0.175
9781	102636309	Gssos2	NC_000068.8	+	155418728	155421078	155418731	155421078	155416519	155416609	9781	4,0,1	1,0,1	1,0,1	1,0,0	152	149	2.20322e-19	9.47875e-18	0.797,NA,0.495	0.495,NA,1.0	-0.102
6613	170833	Hook2	NC_000074.7	+	85727949	85728053	85727952	85728053	85727783	85727866	6613	3,9,12	1,0,6	3,0,9	1,1,1	152	149	3.52307e-19	1.50456e-17	0.746,1.0,0.662	0.746,0.0,0.898	0.255
10051	105245082	Gm40582	NC_000075.7	+	116005778	116007675	116007015	116007675	116004978	116005087	10051	41,8,12	2,1,1	20,16,26	2,5,5	1386	149	4.2928e-19	1.8199e-17	0.688,0.462,0.563	0.518,0.256,0.359	0.193
5552	240665	Ccnj	NC_000085.7	+	40833488	40833648	40833521	40833648	40833103	40833403	5552	10,16,6	0,2,1	12,8,7	5,1,2	182	149	5.93165e-19	2.49645e-17	1.0,0.868,0.831	0.663,0.868,0.741	0.142
1849	320816	Ankrd16	NC_000068.8	+	11789007	11789263	11789101	11789263	11788451	11788567	1849	6,4,7	6,8,6	4,3,8	2,4,0	243	149	7.11967e-19	2.97489e-17	0.38,0.235,0.417	0.551,0.315,1.0	-0.278
8642	99526	Usp53	NC_000069.7	-	122776333	122776496	122776333	122776358	122777930	122778183	8642	5,3,6	2,5,4	2,3,4	1,0,0	287	149	2.71569e-18	1.12662e-16	0.565,0.238,0.438	0.509,1.0,1.0	-0.423
8568	140570	Plxnb2	NC_000081.7	-	89039751	89040380	89039751	89040377	89040458	89040588	8568	5,14,11	9,9,18	12,6,17	5,7,7	152	149	4.91788e-18	2.02575e-16	0.353,0.604,0.375	0.702,0.457,0.704	-0.177
4817	16201	Ilf3	NC_000075.7	+	21299804	21300049	21299819	21300049	21299407	21299446	4817	4,11,6	7,20,44	2,0,9	0,32,24	164	149	5.46654e-18	2.23589e-16	0.342,0.333,0.11	1.0,0.0,0.254	-0.156
272	216560	Wdpcp	NC_000077.7	+	21586377	21586542	21586415	21586542	21522210	21522370	272	2,0,1	2,0,1	6,0,1	2,0,0	187	149	6.14432e-18	2.49554e-16	0.443,NA,0.443	0.705,NA,1.0	-0.41
3873	170791	Rbm39	NC_000068.8	-	156014747	156016894	156014747	156014942	156019255	156019305	3873	117512551376	50233190	804870961	240244245	2101	149	8.3219e-18	3.3565e-16	0.625,0.276,0.339	0.192,0.202,0.218	0.209
5973	22696	Zfp37	NC_000070.7	-	62123260	62123345	62123260	62123342	62126565	62126783	5973	0,3,1	1,6,5	5,0,1	4,2,0	152	149	9.27269e-18	3.71419e-16	0.0,0.329,0.164	0.551,0.0,1.0	-0.353
1459	228880	Zmynd8	NC_000068.8	-	165687940	165688159	165687940	165688084	165693919	165694068	1459	44179154	18,32,31	76,87,98	34,30,34	224	149	1.02853e-17	4.09158e-16	0.619,0.788,0.768	0.598,0.659,0.657	0.087
7778	16801	Arhgef1	NC_000073.7	+	24616225	24616366	24616228	24616366	24615442	24615478	7778	105,73,64	11,7,4	48,40,64	7,10,18	152	149	2.11282e-17	8.34779e-16	0.903,0.911,0.94	0.87,0.797,0.777	0.103
6018	15251	Hif1a	NC_000078.7	+	73988461	73988626	73988503	73988626	73987121	73987405	6018	116127107	47,31,34	125,76,101	18,16,20	191	149	2.49259e-17	9.78174e-16	0.658,0.762,0.711	0.844,0.787,0.798	-0.099
4056	208967	Thnsl1	NC_000068.8	+	21217751	21219820	21217772	21219820	21214695	21214852	4056	6,2,5	2,3,3	10,4,9	2,0,2	170	149	6.95809e-17	2.71226e-15	0.724,0.369,0.594	0.814,1.0,0.798	-0.308
4853	72599	Pdia5	NC_000082.7	-	35230663	35230824	35230663	35230805	35231296	35231367	4853	16,5,3	5,4,5	12,8,1	0,0,2	168	149	7.13171e-17	2.7614e-15	0.739,0.526,0.347	1.0,1.0,0.307	-0.232
7814	329165	Abi2	NC_000067.7	+	60487236	60487361	60487239	60487361	60483143	60483241	7814	0,1,5	0,4,2	6,19,10	7,5,2	152	149	1.02127e-16	3.92818e-15	NA,0.197,0.71	0.457,0.788,0.831	-0.239
693	320159	Togaram2	NC_000083.7	+	72023292	72023512	72023316	72023512	72021672	72021767	693	1,0,1	10,4,2	2,8,2	4,4,10	173	149	1.14942e-16	4.392e-15	0.079,0.0,0.301	0.301,0.633,0.147	-0.234
3016	76866	Morn1	NC_000070.7	+	155177042	155177606	155177518	155177606	155176725	155176816	3016	6,7,20	2,0,4	8,5,5	4,3,2	625	149	1.46606e-16	5.56529e-15	0.417,1.0,0.544	0.323,0.284,0.373	0.327
2596	241915	Phc3	NC_000069.7	-	30968243	30968475	30968243	30968450	30968566	30968699	2596	51,33,34	6,8,15	34,33,26	1,4,5	174	149	2.13191e-16	8.04034e-15	0.879,0.779,0.66	0.967,0.876,0.817	-0.114
9389	115490136	Gm15860	NC_000071.7	-	123479522	123482005	123479522	123481838	123482327	123482516	9389	1,2,5	3,1,0	7,1,0	2,1,0	316	149	6.39226e-16	2.39524e-14	0.136,0.485,1.0	0.623,0.32,NA	0.069
8297	80877	Lrba	NC_000069.7	+	86683304	86683501	86683307	86683501	86680406	86680508	8297	57,45,48	0,2,3	51,47,50	1,5,14	152	149	6.78234e-16	2.52512e-14	1.0,0.957,0.94	0.98,0.902,0.778	0.079
10277	12633	Cflar	NC_000067.7	+	58765383	58765891	58765464	58765891	58752729	58752818	10277	16,15,4	15,33,27	6,6,6	19,42,42	230	149	8.38519e-16	3.10199e-14	0.409,0.227,0.088	0.17,0.085,0.085	0.128
2018	17356	Afdn	NC_000083.7	+	14027538	14027654	14027541	14027654	14024200	14024396	2018	9,24,23	28,33,32	27,33,44	49,28,24	152	149	8.49115e-16	3.1213e-14	0.24,0.416,0.413	0.351,0.536,0.642	-0.153
2143	54123	Irf7	NC_000073.7	-	140844405	140844568	140844405	140844472	140844637	140844696	2143	16,13,15	1,6,1	6,8,14	4,8,6	245	149	9.98845e-16	3.64861e-14	0.907,0.569,0.901	0.477,0.378,0.587	0.312
5235	11482	Acvrl1	NC_000081.7	+	101032487	101032624	101032525	101032624	101026807	101026944	5235	0,8,10	59,25,31	8,12,16	28,32,40	187	149	1.39999e-15	5.08195e-14	0.0,0.203,0.204	0.185,0.23,0.242	-0.083
8574	70233	Cd2bp2	NC_000073.7	-	126794532	126794639	126794532	126794633	126794958	126795249	8574	0,1,0	0,0,1	0,0,2	2,4,10	155	149	1.7549e-15	6.33072e-14	NA,1.0,0.0	0.0,0.0,0.161	0.446
8531	24127	Xrn1	NC_000075.7	+	95933646	95933807	95933685	95933807	95930393	95930496	8531	13,19,25	9,21,28	15,15,26	17,6,7	188	149	1.84864e-15	6.62773e-14	0.534,0.418,0.414	0.412,0.665,0.746	-0.152
9958	59040	Rhot1	NC_000077.7	+	80155069	80155213	80155139	80155213	80148339	80148462	9958	35,34,30	42,21,28	29,46,37	19,21,20	219	149	3.48833e-15	1.24296e-13	0.362,0.524,0.422	0.509,0.598,0.557	-0.119
6033	102637828	Gm12519	NC_000070.7	-	55973656	55974223	55973656	55973730	55974366	55974449	6033	62,52,78	19,20,31	29,18,28	12,16,20	642	149	4.16118e-15	1.47367e-13	0.431,0.376,0.369	0.359,0.207,0.245	0.122
5660	19682	Rdh5	NC_000076.7	-	128750003	128750225	128750003	128750167	128753748	128754007	5660	0,1,2	0,2,0	2,2,0	2,1,5	207	149	5.82298e-15	2.04969e-13	NA,0.265,1.0	0.419,0.59,0.0	0.296
7604	544971	Bdp1	NC_000079.7	-	100167292	100167497	100167292	100167440	100171591	100171778	7604	47,15,16	3,0,3	15,27,21	4,2,7	206	149	1.20813e-14	4.227e-13	0.919,1.0,0.794	0.731,0.907,0.685	0.13
2698	12153	Bmp1	NC_000080.7	-	70723586	70724370	70723586	70723712	70727459	70727640	2698	80,131,95	0,7,14	95,80,100	11,8,17	807	149	1.25121e-14	4.34265e-13	1.0,0.776,0.556	0.615,0.649,0.521	0.182
2971	234875	Ttc13	NC_000074.7	-	125403079	125403189	125403079	125403186	125405740	125405825	2971	21,17,14	7,3,3	18,18,25	2,1,2	152	149	1.25614e-14	4.34265e-13	0.746,0.847,0.821	0.898,0.946,0.925	-0.118
6456	381812	Cracr2a	NC_000072.7	+	127617522	127618276	127618169	127618276	127616126	127616172	6456	15,23,22	0,2,6	15,14,14	3,2,8	796	149	1.58744e-14	5.45552e-13	1.0,0.683,0.407	0.483,0.567,0.247	0.264
2754	70120	Yars2	NC_000082.7	+	16124326	16124482	16124361	16124482	16122399	16122567	2754	43,59,51	25,4,19	28,51,40	25,16,24	184	149	1.89821e-14	6.48518e-13	0.582,0.923,0.685	0.476,0.721,0.574	0.14
10218	219150	Hmbox1	NC_000080.7	-	65063049	65063141	65063049	65063138	65064220	65064316	10218	12,20,15	4,6,11	12,13,13	1,1,6	152	149	1.93542e-14	6.57363e-13	0.746,0.766,0.572	0.922,0.927,0.68	-0.148
7880	20637	Snrnp70	NC_000073.7	-	45030140	45032608	45030140	45030242	45033227	45033309	7880	212918671852	29,97,95	11879881292	92,70,98	2515	149	2.25425e-14	7.61201e-13	0.813,0.533,0.536	0.433,0.455,0.439	0.185
6911	237943	Gpatch8	NC_000077.7	-	102398969	102401087	102398969	102399037	102418919	102418992	6911	272292336	20,46,40	203218211	42,37,39	2199	149	3.0357e-14	1.01915e-12	0.48,0.301,0.363	0.247,0.285,0.268	0.115
9779	216766	Gemin5	NC_000077.7	-	58013107	58013204	58013107	58013201	58015757	58016244	9779	5,16,4	7,12,11	9,6,9	6,0,8	152	149	4.71266e-14	1.57305e-12	0.412,0.567,0.263	0.595,1.0,0.524	-0.292
1740	110172	Slc35b1	NC_000077.7	+	95277311	95277455	95277336	95277455	95276626	95276730	1740	57,43,37	17,14,16	41,20,56	21,12,37	174	149	5.56902e-14	1.84828e-12	0.742,0.725,0.664	0.626,0.588,0.564	0.118
9163	11481	Acvr2b	NC_000075.7	+	119257266	119257418	119257290	119257418	119257032	119257142	9163	10,18,12	3,7,6	7,6,9	8,6,5	173	149	5.65678e-14	1.86674e-12	0.742,0.689,0.633	0.43,0.463,0.608	0.188
3880	170791	Rbm39	NC_000068.8	-	156019255	156020872	156019255	156019305	156021096	156021160	3880	149513151587	75179128	9139731246	231218234	1716	149	7.96275e-14	2.61286e-12	0.634,0.389,0.518	0.256,0.279,0.316	0.23
5439	54636	Wdr45	NC_000086.8	+	7593988	7594439	7594049	7594439	7593585	7593731	5439	90,73,72	17,2,7	69,58,61	20,7,16	210	149	8.67691e-14	2.83121e-12	0.79,0.963,0.879	0.71,0.855,0.73	0.112
10386	22441	Xlr	NC_000086.8	-	52798109	52798235	52798109	52798187	52799598	52799673	10386	1,1,1	0,0,2	1,1,4	0,1,3	197	149	1.0139e-13	3.28979e-12	1.0,1.0,0.274	1.0,0.431,0.502	0.114
9561	20698	Sphk1	NC_000077.7	+	116425674	116425827	116425677	116425827	116424795	116424999	9561	7,1,2	4,3,2	2,1,3	2,0,1	152	149	1.26914e-13	4.09509e-12	0.632,0.246,0.495	0.495,1.0,0.746	-0.289
7703	239647	Pced1b	NC_000081.7	+	97279384	97283574	97281905	97283574	97259080	97259216	7703	102,67,86	1,0,4	59,36,30	0,0,1	2670	149	1.94967e-13	6.25619e-12	0.851,1.0,0.545	1.0,1.0,0.626	-0.077
10486	14270	Srgap2	NC_000067.7	-	131220258	131223277	131220258	131220583	131224057	131224204	10486	239290327	12,14,8	192134193	20,10,8	2843	149	2.01411e-13	6.42745e-12	0.511,0.521,0.682	0.335,0.413,0.558	0.136
26	226551	Suco	NC_000067.7	-	161680379	161680516	161680379	161680504	161681283	161681407	26	19,19,18	21,0,10	12,11,17	6,0,4	161	149	2.88141e-13	9.04606e-12	0.456,1.0,0.625	0.649,1.0,0.797	-0.122
4169	68520	Zfyve21	NC_000078.7	+	111792009	111794119	111793976	111794119	111791450	111791542	4169	119114100	12,9,0	61,81,88	0,0,0	2116	149	2.86308e-13	9.04606e-12	0.411,0.471,1.0	1.0,1.0,1.0	-0.373
4443	16998	Ltbp3	NC_000085.7	+	5795905	5796148	5795996	5796148	5795467	5795797	4443	44,66,59	8,11,15	50,39,66	5,10,0	240	149	2.88041e-13	9.04606e-12	0.773,0.788,0.709	0.861,0.708,1.0	-0.1
3637	217030	Synrg	NC_000077.7	+	83867905	83868027	83867908	83868027	83862377	83862418	3637	7,35,33	9,32,19	36,29,33	22,16,7	152	149	3.37872e-13	1.05503e-11	0.433,0.517,0.63	0.616,0.64,0.822	-0.166
5230	76022	Gon4l	NC_000069.7	+	88805374	88805667	88805411	88805667	88802126	88803878	5230	3,1,1	0,0,0	0,0,1	5,1,3	186	149	3.42322e-13	1.06321e-11	1.0,1.0,1.0	0.0,0.0,0.211	0.93
6056	67911	Zfp169	NC_000079.7	-	48634238	48644872	48634238	48644869	48651798	48651894	6056	10,3,3	8,10,10	2,0,4	2,1,0	152	149	4.77213e-13	1.47428e-11	0.551,0.227,0.227	0.495,0.0,1.0	-0.163
6058	56210	Rev1	NC_000067.7	-	38118370	38118479	38118370	38118476	38122784	38122901	6058	13,16,16	6,10,6	23,22,21	3,2,7	152	149	7.82396e-13	2.40431e-11	0.68,0.611,0.723	0.883,0.915,0.746	-0.177
7164	545389	Cep170	NC_000067.7	-	176577491	176577726	176577491	176577618	176582731	176584549	7164	54,36,44	0,6,3	28,20,18	8,3,6	257	149	8.3033e-13	2.53819e-11	1.0,0.777,0.895	0.67,0.794,0.635	0.191
2618	14872	Gstt2	NC_000076.7	-	75668494	75668666	75668494	75668645	75669485	75669573	2618	2,2,1	48,16,32	5,2,4	23,18,11	170	149	1.13681e-12	3.45685e-11	0.035,0.099,0.027	0.16,0.089,0.242	-0.11
2014	68187	Fam135a	NC_000067.7	-	24067280	24069609	24067280	24069021	24069822	24069977	2014	75,94,93	47,37,29	66,78,106	18,21,28	737	149	1.25801e-12	3.80548e-11	0.244,0.339,0.393	0.426,0.429,0.434	-0.104
4212	104457	0610010K14Rik	NC_000077.7	-	70126031	70126294	70126031	70126290	70126521	70126626	4212	31,12,18	20,31,19	8,14,10	23,21,21	153	149	1.76931e-12	5.32444e-11	0.602,0.274,0.48	0.253,0.394,0.317	0.131
4306	71240	Osbpl7	NC_000077.7	+	96944734	96945054	96944940	96945054	96943595	96943649	4306	2,4,9	11,11,10	1,2,2	7,4,0	355	149	2.38039e-12	7.12644e-11	0.071,0.132,0.274	0.057,0.173,1.0	-0.251
5505	102639192	Gm35558	NC_000078.7	-	110563041	110566798	110563041	110566217	110567186	110578147	5505	23,12,8	0,1,1	4,8,18	3,1,1	730	149	3.00671e-12	8.95537e-11	1.0,0.71,0.62	0.214,0.62,0.786	0.237
7349	12293	Cacna2d1	NC_000071.7	+	16531309	16531381	16531324	16531381	16525081	16525156	7349	10,6,5	129118146	54,61,58	166132194	164	149	3.96141e-12	1.17387e-10	0.066,0.044,0.03	0.228,0.296,0.214	-0.199
3901	66163	Mrpl4	NC_000075.7	+	20918623	20918836	20918659	20918836	20918122	20918152	3901	0,2,2	3,6,7	2,7,3	0,0,2	185	149	4.46488e-12	1.31635e-10	0.0,0.212,0.187	1.0,1.0,0.547	-0.716
6987	75871	Zfp821	NC_000074.7	+	110448292	110448490	110448385	110448490	110447826	110447975	6987	0,5,7	12,19,15	0,0,2	2,6,7	242	149	5.38175e-12	1.57865e-10	0.0,0.139,0.223	0.0,0.0,0.15	0.071
2080	75547	Akap13	NC_000073.7	+	75375718	75375868	75375721	75375868	75375047	75375160	2080	10,14,12	10,11,3	12,11,8	0,0,11	152	149	5.82932e-12	1.70134e-10	0.495,0.555,0.797	1.0,1.0,0.416	-0.19
2372	229096	Ythdf3	NC_000069.7	+	16257350	16259588	16257989	16259588	16243641	16243727	2372	209177179	111,117,47	112,93,150	119140174	788	149	7.56719e-12	2.19751e-10	0.263,0.222,0.419	0.151,0.112,0.14	0.167
7846	19090	Prkdc	NC_000082.7	+	15625897	15626091	15625979	15626091	15623785	15623960	7846	22,27,22	0,1,0	15,14,21	0,7,0	231	149	9.30888e-12	2.68985e-10	1.0,0.946,1.0	1.0,0.563,1.0	0.128
1755	81702	Ankrd17	NC_000071.7	-	90426101	90426250	90426101	90426247	90432899	90433002	1755	45,76,67	4,16,12	65,50,55	16,19,19	152	149	1.50204e-11	4.31874e-10	0.917,0.823,0.846	0.799,0.721,0.739	0.109
1566	14265	Fmr1	NC_000086.8	+	67755836	67756019	67755911	67756019	67754189	67754385	1566	17,23,29	8,6,0	18,21,24	3,0,0	224	149	2.13926e-11	6.1206e-10	0.586,0.718,1.0	0.8,1.0,1.0	-0.165
2293	107526	Gimap4	NC_000072.7	+	48668331	48668996	48668345	48668996	48667304	48667882	2293	9,10,9	5,1,0	10,9,11	2,0,0	163	149	2.3392e-11	6.65985e-10	0.622,0.901,1.0	0.82,1.0,1.0	-0.099
2407	226691	Ifi207	NC_000067.7	-	173562661	173562879	173562661	173562873	173563752	173564037	2407	2,12,19	10,0,0	9,18,12	0,2,1	155	149	4.60515e-11	1.30472e-09	0.161,1.0,1.0	1.0,0.896,0.92	-0.218
8268	68039	Nmb	NC_000073.7	-	80551974	80552251	80551974	80552246	80553881	80554054	8268	14,19,25	0,0,3	15,17,25	3,4,2	154	149	5.24398e-11	1.4785e-09	1.0,1.0,0.89	0.829,0.804,0.924	0.111
3910	320940	Atp11c	NC_000086.8	-	59274507	59275373	59274507	59274612	59281916	59282070	3910	35,52,51	14,7,5	36,24,24	3,2,0	910	149	5.59053e-11	1.56859e-09	0.29,0.549,0.625	0.663,0.663,1.0	-0.287
5218	224454	Zdhhc14	NC_000083.7	+	5802966	5804086	5803011	5804086	5781746	5781849	5218	3,11,23	4,0,11	6,7,7	4,10,8	194	149	5.67506e-11	1.58465e-09	0.365,1.0,0.616	0.535,0.35,0.402	0.231
6907	373864	Col27a1	NC_000070.7	+	63236428	63236552	63236498	63236552	63236220	63236274	6907	0,2,0	1,7,3	0,5,1	4,4,3	219	149	6.15247e-11	1.70974e-09	0.0,0.163,0.0	0.0,0.46,0.185	-0.161
7704	239647	Pced1b	NC_000081.7	+	97279384	97283574	97281908	97283574	97259080	97259216	7704	103,67,89	0,4,0	59,36,32	9,1,2	2673	149	7.10673e-11	1.96552e-09	1.0,0.483,1.0	0.268,0.667,0.471	0.359
6285	68427	Slc39a13	NC_000068.8	-	90898775	90899998	90898775	90899084	90900499	90900676	6285	83,87,75	30,24,29	34,21,34	15,22,14	1063	149	8.62492e-11	2.3741e-09	0.279,0.337,0.266	0.241,0.118,0.254	0.09
862	76025	Cant1	NC_000077.7	-	118308399	118308632	118308399	118308480	118309755	118309944	862	21,8,16	7,10,7	9,9,19	4,15,18	301	149	1.09364e-10	2.99616e-09	0.598,0.284,0.531	0.527,0.229,0.343	0.105
8984	320271	Scai	NC_000068.8	-	38972721	38972939	38972721	38972864	38973549	38973622	8984	6,3,3	7,2,4	6,2,1	0,0,0	224	149	1.1813e-10	3.22112e-09	0.363,0.499,0.333	1.0,1.0,1.0	-0.602
9971	13047	Cux1	NC_000071.7	-	136341496	136342168	136341496	136341862	136343160	136343257	9971	39168133	4,9,11	121,66,106	3,3,3	455	149	1.24879e-10	3.38924e-09	0.761,0.859,0.798	0.93,0.878,0.92	-0.103
2022	277854	Depdc5	NC_000071.7	+	33094864	33095048	33094891	33095048	33091293	33091359	2022	5,3,0	28,17,10	4,2,12	22,18,15	176	149	1.31441e-10	3.55075e-09	0.131,0.13,0.0	0.133,0.086,0.404	-0.121
10249	380969	Nckap5l	NC_000081.7	-	99331920	99332145	99331920	99332070	99333925	99333968	10249	1,1,3	1,0,0	0,4,1	2,2,4	224	149	1.35061e-10	3.63164e-09	0.399,1.0,1.0	0.0,0.571,0.143	0.562
10251	380969	Nckap5l	NC_000081.7	-	99331920	99332150	99331920	99332070	99333925	99333968	10251	1,1,3	1,0,0	0,4,1	2,2,4	229	149	1.41296e-10	3.78178e-09	0.394,1.0,1.0	0.0,0.565,0.14	0.563
10326	74200	Khdc4	NC_000069.7	+	88617136	88617249	88617164	88617249	88616086	88616248	10326	62,21,12	14,36,33	20,45,47	11,19,14	177	149	1.50302e-10	4.00438e-09	0.788,0.329,0.234	0.605,0.666,0.739	-0.22
6272	230577	Pars2	NC_000070.7	+	106509465	106512479	106510314	106512479	106508265	106508328	6272	5,17,16	0,2,3	8,1,18	6,1,1	998	149	2.11709e-10	5.61463e-09	1.0,0.559,0.443	0.166,0.13,0.729	0.326
2935	244713	Zfp317	NC_000075.7	+	19556507	19556603	19556520	19556603	19554904	19555000	2935	12,12,11	23,7,12	6,6,11	14,12,24	162	149	2.16154e-10	5.70646e-09	0.324,0.612,0.457	0.283,0.315,0.297	0.166
5555	216846	Cntrob	NC_000077.7	-	69210683	69211234	69210683	69210800	69211643	69211800	5555	8,6,2	9,8,3	6,6,6	0,2,1	583	149	3.03488e-10	7.97583e-09	0.185,0.161,0.146	1.0,0.434,0.605	-0.516
3902	66163	Mrpl4	NC_000075.7	+	20918559	20918836	20918659	20918836	20918122	20918152	3902	1,4,4	3,6,7	6,7,10	0,0,2	249	149	3.20165e-10	8.37621e-09	0.166,0.285,0.255	1.0,1.0,0.749	-0.681
1321	67228	Dph7	NC_000068.8	+	24855568	24855666	24855571	24855666	24853467	24853555	1321	3,0,2	6,0,11	2,0,0	4,9,10	152	149	3.64174e-10	9.48485e-09	0.329,NA,0.151	0.329,0.0,0.0	0.13
469	246694	Hps5	NC_000073.7	-	46427444	46427623	46427444	46427524	46428495	46428584	469	21,11,13	2,3,2	14,6,13	0,2,1	248	149	3.89348e-10	1.00952e-08	0.863,0.688,0.796	1.0,0.643,0.886	-0.061
10055	78774	Cfap61	NC_000068.8	+	145815336	145815551	145815391	145815551	145805217	145805350	10055	1,0,2	2,4,4	0,1,2	0,0,0	204	149	4.03373e-10	1.03663e-08	0.268,0.0,0.268	NA,1.0,1.0	-0.821
9527	233977	Ppfia1	NC_000073.7	-	144038769	144038948	144038769	144038945	144045188	144045389	9527	4,2,4	56,85,61	7,9,6	42,64,38	152	149	4.02178e-10	1.03663e-08	0.065,0.023,0.06	0.14,0.121,0.134	-0.082
2299	277414	Trp53i11	NC_000068.8	+	93027806	93028093	93027956	93028093	93027241	93027323	2299	87,40,41	16,27,26	29,29,33	26,19,17	299	149	4.99876e-10	1.27898e-08	0.73,0.425,0.44	0.357,0.432,0.492	0.105
8154	13549	Dyrk1b	NC_000073.7	+	27885138	27885454	27885258	27885454	27884720	27884861	8154	52,60,45	18,10,13	85,74,101	13,0,19	269	149	5.77682e-10	1.47157e-08	0.615,0.769,0.657	0.784,1.0,0.746	-0.163
2207	72745	Tmem161b	NC_000079.7	+	84430633	84430981	84430867	84430981	84420289	84420446	2207	34,26,16	2,0,1	15,17,11	4,1,1	383	149	6.38135e-10	1.61847e-08	0.869,1.0,0.862	0.593,0.869,0.811	0.153
9841	70579	Zc3h11a	NC_000067.7	-	133581710	133582176	133581710	133581770	133588974	133589137	9841	253155194	11,10,8	161123162	2,4,3	555	149	8.03042e-10	2.02785e-08	0.861,0.806,0.867	0.956,0.892,0.935	-0.083
10467	14886	Gtf2i	NC_000071.7	-	134335385	134335585	134335385	134335581	134343236	134343587	10467	3,3,0	0,0,0	0,0,0	1,2,0	153	149	1.13764e-09	2.86036e-08	1.0,1.0,NA	0.0,0.0,NA	1
6605	57914	Crlf2	NC_000071.7	-	109703372	109703625	109703372	109703526	109703884	109704047	6605	1,3,1	0,0,1	3,0,0	4,2,1	248	149	1.20997e-09	3.0291e-08	1.0,1.0,0.375	0.311,0.0,0.0	0.688
4321	382620	Tmed8	NC_000078.7	-	87223407	87223604	87223407	87223537	87228162	87228244	4321	4,3,3	27,9,12	3,0,0	10,17,20	216	149	1.30147e-09	3.24417e-08	0.093,0.187,0.147	0.171,0.0,0.0	0.085
2137	71721	Fam13c	NC_000076.7	+	70388858	70389055	70388861	70389055	70387524	70387620	2137	8,11,15	10,5,5	5,4,7	11,2,6	152	149	1.37343e-09	3.40893e-08	0.44,0.683,0.746	0.308,0.662,0.534	0.122
10403	100561	Slc15a4	NC_000071.7	-	127681601	127681770	127681601	127681712	127685835	127686125	10403	25,21,10	5,9,3	20,38,27	1,6,0	207	149	1.50366e-09	3.70053e-08	0.783,0.627,0.706	0.935,0.82,1.0	-0.213
2257	78913	Ltn1	NC_000082.7	-	87209262	87210176	87209262	87209449	87212041	87212083	2257	42,43,34	78,34,31	68,42,60	32,33,46	876	149	1.50282e-09	3.70053e-08	0.084,0.177,0.157	0.265,0.178,0.182	-0.069
6563	270627	Taf1	NC_000086.8	+	100584365	100584607	100584428	100584607	100582673	100582793	6563	9,18,21	5,12,23	21,23,40	17,18,5	212	149	1.59674e-09	3.91304e-08	0.559,0.513,0.391	0.465,0.473,0.849	-0.108
4498	70885	Ints10	NC_000074.7	+	69276819	69277781	69277703	69277781	69274808	69274902	4498	88,49,51	8,4,5	60,69,60	1,1,3	1033	149	1.60405e-09	3.91442e-08	0.613,0.639,0.595	0.896,0.909,0.743	-0.234
1430	59026	Huwe1	NC_000086.8	+	150589267	150589403	150589271	150589403	150587441	150587536	1430	0,3,9	3,5,10	10,11,8	0,9,15	153	149	1.71131e-09	4.15869e-08	0.0,0.369,0.467	1.0,0.543,0.342	-0.35
2751	106389	Eaf2	NC_000082.7	-	36620948	36621206	36620948	36621064	36628376	36628522	2751	0,0,0	0,1,3	10,2,1	0,0,0	291	149	2.01181e-09	4.86859e-08	NA,0.0,0.0	1.0,1.0,1.0	-1
9623	19243	Ptp4a1	NC_000067.7	-	30985118	30985720	30985118	30985717	30988077	30988435	9623	12,11,14	0,0,5	12,6,11	0,4,10	152	149	2.23409e-09	5.38406e-08	1.0,1.0,0.733	1.0,0.595,0.519	0.206
2951	71746	Rgl3	NC_000075.7	-	21900144	21900321	21900144	21900255	21900660	21900764	2951	0,1,1	0,18,16	2,2,4	17,8,15	215	149	2.58088e-09	6.19411e-08	NA,0.037,0.042	0.075,0.148,0.156	-0.087
2927	16568	Kif3a	NC_000077.7	+	53481543	53484357	53484200	53484357	53477661	53477757	2927	175,105,96	2,2,11	50,106,67	4,18,12	2806	149	2.63063e-09	6.28754e-08	0.823,0.736,0.317	0.399,0.238,0.229	0.337
7155	233871	Atxn2l	NC_000073.7	-	126095608	126095818	126095608	126095800	126096425	126096536	7155	10,19,10	81,88,78	21,20,18	82,50,68	167	149	2.73716e-09	6.51533e-08	0.099,0.162,0.103	0.186,0.263,0.191	-0.092
3881	170791	Rbm39	NC_000068.8	-	156019255	156019826	156019255	156019305	156021096	156021160	3881	407350381	75179128	263245326	231218234	670	149	2.77231e-09	6.57208e-08	0.547,0.303,0.398	0.202,0.2,0.237	0.203
498	236082	Dhrsx	NC_000070.7	+	156408304	156408564	156408356	156408564	156405588	156405690	498	4,12,7	87,20,30	0,1,0	25,15,32	201	149	2.903e-09	6.85391e-08	0.033,0.308,0.147	0.0,0.047,0.0	0.147
7848	320150	Zdhhc17	NC_000076.7	-	110803544	110803707	110803544	110803666	110804289	110804354	7848	75,39,49	5,6,14	40,38,26	0,2,6	190	149	3.06834e-09	7.21495e-08	0.922,0.836,0.733	1.0,0.937,0.773	-0.073
9937	11865	Arntl	NC_000073.7	+	112898393	112898640	112898396	112898640	112894650	112894800	9937	3,3,7	10,4,1	1,1,2	0,0,0	152	149	3.62931e-09	8.49961e-08	0.227,0.424,0.873	1.0,1.0,1.0	-0.492
6140	68730	Dus1l	NC_000077.7	-	120683853	120684112	120683853	120683936	120684659	120684772	6140	36,5,16	47,22,27	5,9,9	29,17,29	325	149	3.67043e-09	8.56139e-08	0.26,0.094,0.214	0.073,0.195,0.125	0.058
1260	18551	Pcsk4	NC_000076.7	-	80157245	80157785	80157245	80157755	80157914	80158043	1260	0,1,6	0,3,0	0,5,1	0,0,1	179	149	3.98126e-09	9.24927e-08	NA,0.217,1.0	NA,1.0,0.454	-0.118
1425	18286	Odf2	NC_000068.8	+	29783012	29783166	29783049	29783166	29782197	29782288	1425	50,39,47	4,0,0	35,46,47	1,13,6	186	149	4.69108e-09	1.08549e-07	0.909,1.0,1.0	0.966,0.739,0.863	0.114
6043	20911	Stxbp2	NC_000074.7	+	3690548	3691206	3691110	3691206	3689507	3689617	6043	14,16,15	1,1,3	4,0,4	3,1,2	711	149	5.14198e-09	1.1851e-07	0.746,0.77,0.512	0.218,0.0,0.295	0.505
3042	224697	Adamts10	NC_000083.7	+	33756060	33756149	33756065	33756149	33750553	33750771	3042	26,15,14	8,2,0	27,13,27	7,4,17	154	149	5.28614e-09	1.21351e-07	0.759,0.879,1.0	0.789,0.759,0.606	0.161
4912	107652	Uap1	NC_000067.7	-	169975564	169975615	169975564	169975612	169976839	169977028	4912	31,54,63	9,18,23	51,51,66	3,9,20	152	149	6.72109e-09	1.53685e-07	0.772,0.746,0.729	0.943,0.847,0.764	-0.102
1604	22751	Zfp90	NC_000074.7	+	107146052	107146242	107146146	107146242	107145702	107145829	1604	1,13,17	7,6,11	3,1,2	3,7,3	243	149	6.9204e-09	1.57622e-07	0.081,0.571,0.487	0.38,0.081,0.29	0.129
4150	329908	Usp24	NC_000070.7	+	106221525	106221589	106221529	106221589	106219884	106219932	4150	2,0,2	2,0,7	3,11,6	6,3,2	153	149	7.24986e-09	1.64481e-07	0.493,NA,0.218	0.327,0.781,0.745	-0.262
6187	231051	Kmt2c	NC_000071.7	-	25498104	25498243	25498104	25498174	25499554	25499719	6187	3,3,2	0,0,0	3,0,0	0,4,4	218	149	8.6773e-09	1.961e-07	1.0,1.0,1.0	1.0,0.0,0.0	0.667
59	20841	Zfp143	NC_000073.7	+	109671325	109671409	109671328	109671409	109670578	109670662	59	8,6,4	3,10,14	1,3,14	3,2,8	152	149	9.34973e-09	2.10478e-07	0.723,0.37,0.219	0.246,0.595,0.632	-0.054
5165	208908	Ccdc62	NC_000071.7	+	124089814	124089930	124089863	124089930	124089261	124089350	5165	4,2,5	0,0,1	1,0,3	4,1,5	198	149	9.74278e-09	2.18479e-07	1.0,1.0,0.79	0.158,0.0,0.311	0.774
9543	14813	Grin2c	NC_000077.7	-	115151559	115152070	115151559	115151973	115157245	115157417	9543	1,1,0	0,0,4	0,0,0	2,1,0	246	149	9.816e-09	2.19274e-07	1.0,1.0,0.0	0.0,0.0,NA	0.667
8049	60595	Actn4	NC_000073.7	-	28609327	28611000	28609327	28609413	28611664	28611746	8049	243197192	43,25,17	151132201	16,14,4	1736	149	9.91126e-09	2.20554e-07	0.327,0.403,0.492	0.448,0.447,0.812	-0.162
5798	66681	Pgm2	NC_000071.7	+	64270877	64273776	64273642	64273776	64269350	64269540	5798	88,42,69	20,5,4	54,50,61	16,13,15	2914	149	1.04096e-08	2.30759e-07	0.184,0.3,0.469	0.147,0.164,0.172	0.157
8614	74080	Nmnat3	NC_000075.7	+	98236071	98236217	98236074	98236217	98178622	98179033	8614	19,20,25	9,12,13	19,25,26	8,4,9	152	149	1.12831e-08	2.49172e-07	0.674,0.62,0.653	0.7,0.86,0.739	-0.117
4741	433809	Rnf207	NC_000070.7	-	152398335	152398404	152398335	152398372	152399498	152399545	4741	2,3,1	1,5,4	0,4,2	0,0,0	181	149	1.403e-08	3.08661e-07	0.622,0.331,0.171	NA,1.0,1.0	-0.625
4179	72831	Dhx30	NC_000075.7	-	109944103	109944279	109944103	109944223	109944558	109944650	4179	5,2,4	0,1,1	0,2,2	6,10,7	205	149	1.53108e-08	3.35566e-07	1.0,0.592,0.744	0.0,0.127,0.172	0.679
3176	72873	Bbof1	NC_000078.7	+	84476361	84476853	84476778	84476853	84475116	84475218	3176	6,0,4	1,2,1	9,14,9	2,0,0	566	149	1.643e-08	3.58741e-07	0.612,0.0,0.513	0.542,1.0,1.0	-0.472
2028	217203	Tmem106a	NC_000077.7	+	101473326	101473530	101473450	101473530	101473067	101473151	2028	0,3,4	0,1,1	3,6,1	5,4,0	273	149	1.68965e-08	3.67546e-07	NA,0.621,0.686	0.247,0.45,1.0	0.088
744	27355	Pald1	NC_000076.7	-	61184086	61184165	61184086	61184162	61184312	61184473	744	7,15,13	8,10,21	18,16,19	36,34,29	152	149	2.12293e-08	4.60074e-07	0.462,0.595,0.378	0.329,0.316,0.391	0.133
1435	59026	Huwe1	NC_000086.8	+	150589267	150589403	150589271	150589403	150586751	150586798	1435	12,15,4	0,1,0	7,9,12	8,6,7	153	149	2.31821e-08	5.00526e-07	1.0,0.936,1.0	0.46,0.594,0.625	0.419
5097	319518	Pdpr	NC_000074.7	+	111828445	111828722	111828492	111828722	111821243	111821458	5097	197175139	19,96,76	181180229	131104157	196	149	2.47652e-08	5.32727e-07	0.887,0.581,0.582	0.512,0.568,0.526	0.148
1408	231915	Uspl1	NC_000071.7	+	149130704	149131250	149130707	149131250	149125154	149125283	1408	4,2,6	0,1,2	0,0,0	2,1,0	152	149	2.56646e-08	5.50038e-07	1.0,0.662,0.746	0.0,0.0,NA	0.803
3669	74123	Foxp4	NC_000083.7	-	48189208	48189422	48189208	48189419	48189531	48189679	3669	18,22,22	9,8,8	27,9,13	9,1,1	152	149	2.6493e-08	5.65703e-07	0.662,0.729,0.729	0.746,0.898,0.927	-0.15
5578	21423	Tcf3	NC_000076.7	-	80254599	80254652	80254599	80254649	80255300	80255433	5578	11,15,10	6,17,29	9,9,13	21,19,38	152	149	2.76772e-08	5.88825e-07	0.642,0.464,0.253	0.296,0.317,0.251	0.165
5611	67116	Cuedc2	NC_000085.7	-	46319984	46320079	46319984	46320058	46320195	46320257	5611	12,12,9	84,72,52	13,9,15	23,35,62	170	149	3.86912e-08	8.17158e-07	0.111,0.127,0.132	0.331,0.184,0.175	-0.107
6801	207304	Hectd1	NC_000078.7	-	51815311	51816148	51815311	51816007	51819056	51819233	6801	141199183	79,53,71	174194194	33,17,50	290	149	3.86208e-08	8.17158e-07	0.478,0.659,0.57	0.73,0.854,0.666	-0.181
7598	57782	Rbak	NC_000071.7	-	143165240	143165397	143165240	143165300	143166303	143166530	7598	0,1,2	1,1,6	1,2,3	3,3,0	246	149	3.9688e-08	8.35174e-07	0.0,0.377,0.168	0.168,0.288,1.0	-0.304
1949	66251	Arfgap3	NC_000081.7	-	83194450	83194585	83194450	83194582	83197669	83197813	1949	51,34,22	7,8,6	19,16,14	1,2,2	152	149	4.81211e-08	1.00898e-06	0.877,0.806,0.782	0.949,0.887,0.873	-0.081
2986	71985	Acad10	NC_000071.7	-	121791726	121791886	121791726	121791851	121794076	121794276	2986	1,7,0	0,0,2	1,6,0	3,2,3	184	149	5.75798e-08	1.19865e-06	1.0,1.0,0.0	0.213,0.708,0.0	0.36
3752	12916	Crem	NC_000084.7	-	3276693	3276775	3276693	3276729	3280948	3281132	3752	3,1,1	16,9,1	3,2,2	3,5,4	195	149	5.75674e-08	1.19865e-06	0.125,0.078,0.433	0.433,0.234,0.276	-0.102
6478	15184	Hdac5	NC_000077.7	-	102109241	102109779	102109241	102109313	102115559	102115781	6478	117197134	55,33,34	205155173	28,31,36	615	149	5.94163e-08	1.23246e-06	0.34,0.591,0.488	0.639,0.548,0.538	-0.102
8334	208968	Zfp280c	NC_000086.8	-	47667256	47667433	47667256	47667406	47677579	47677626	8334	14,13,17	8,14,6	7,10,13	3,2,6	176	149	6.07561e-08	1.25577e-06	0.597,0.44,0.706	0.664,0.809,0.647	-0.126
7412	240041	Zfp945	NC_000083.7	-	23080479	23080954	23080479	23080535	23084220	23084310	7412	39,29,47	5,26,29	19,17,27	45,30,27	568	149	6.18168e-08	1.27316e-06	0.672,0.226,0.298	0.1,0.129,0.208	0.253
15	263406	Plekhg3	NC_000078.7	+	76618820	76618843	76618823	76618843	76618377	76618416	15	13,8,14	36,20,24	12,17,18	12,15,22	152	149	7.56932e-08	1.55345e-06	0.261,0.282,0.364	0.495,0.526,0.445	-0.186
4022	69257	Elf2	NC_000069.7	-	51172289	51172463	51172289	51172427	51174173	51174287	4022	54,23,11	88,96,75	24,39,35	70,60,56	185	149	1.13784e-07	2.32697e-06	0.331,0.162,0.106	0.216,0.344,0.335	-0.099
9555	18087	Nktr	NC_000075.7	+	121582053	121582158	121582056	121582158	121581472	121581529	9555	34,27,24	48,19,22	6,17,10	25,13,27	152	149	1.21227e-07	2.47048e-06	0.41,0.582,0.517	0.19,0.562,0.266	0.164
887	225861	Snx32	NC_000085.7	-	5546343	5546480	5546343	5546430	5547013	5547053	887	4,4,4	24,7,10	0,1,2	18,7,5	199	149	1.26287e-07	2.5646e-06	0.111,0.3,0.23	0.0,0.097,0.23	0.105
7158	69807	Trim32	NC_000070.7	+	65531365	65534477	65531368	65534477	65523222	65523306	7158	11,9,6	1,4,0	8,6,11	3,3,4	152	149	1.38676e-07	2.80638e-06	0.915,0.688,1.0	0.723,0.662,0.729	0.163
322	228598	Ebf4	NC_000068.8	+	130207218	130207577	130207495	130207577	130204165	130204351	322	0,1,1	4,0,0	2,0,2	0,0,0	426	149	1.41695e-07	2.85752e-06	0.0,1.0,1.0	1.0,NA,1.0	-0.333
9878	16188	Il3ra	NC_000080.7	-	8121694	8121939	8121694	8121849	8122574	8122753	9878	2,2,1	1,3,6	4,0,3	7,0,9	239	149	1.44407e-07	2.90213e-06	0.555,0.294,0.094	0.263,NA,0.172	0.097
9221	13821	Epb41l1	NC_000068.8	+	156352652	156352801	156352676	156352801	156351051	156351227	9221	46,16,19	11,4,0	10,13,7	3,5,4	173	149	1.4766e-07	2.95728e-06	0.783,0.775,1.0	0.742,0.691,0.601	0.175
7933	20776	Tmie	NC_000075.7	-	110704695	110705085	110704695	110704907	110708337	110709141	7933	0,3,0	4,0,4	2,1,1	1,0,1	327	149	1.51639e-07	3.02653e-06	0.0,1.0,0.0	0.477,1.0,0.313	-0.263
7632	68961	Phkg2	NC_000073.7	+	127172916	127173138	127173025	127173138	127172518	127172628	7632	0,5,9	0,13,6	1,4,7	16,12,21	258	149	1.60406e-07	3.19055e-06	NA,0.182,0.464	0.035,0.161,0.161	0.204
7747	74772	Atp13a2	NC_000070.7	+	140721622	140721702	140721625	140721702	140721258	140721373	7747	60,31,39	4,3,0	26,23,20	2,2,8	152	149	1.64829e-07	3.26733e-06	0.936,0.91,1.0	0.927,0.919,0.71	0.097
6602	28010	Miip	NC_000070.7	-	147945247	147945542	147945247	147945470	147945810	147945948	6602	18,30,38	3,8,5	19,16,15	1,0,4	221	149	1.84502e-07	3.64486e-06	0.802,0.717,0.837	0.928,1.0,0.717	-0.096
939	20301	Ccl27a	NC_000070.7	-	41771137	41773350	41771137	41771290	41773464	41773524	939	98,95,104	0,0,2	48,40,57	0,1,3	2209	149	1.98546e-07	3.90899e-06	1.0,1.0,0.778	1.0,0.73,0.562	0.162
7136	545156	Kalrn	NC_000082.7	-	33834323	33834584	33834323	33834581	33836761	33837000	7136	15,22,19	38,28,30	3,13,14	29,20,34	152	149	2.02333e-07	3.9701e-06	0.279,0.435,0.383	0.092,0.389,0.288	0.109
5182	102635305	Gm15991	NC_000074.7	+	68425225	68425435	68425240	68425435	68421156	68421274	5182	0,0,1	0,6,2	0,5,0	1,0,0	164	149	2.24029e-07	4.38102e-06	NA,0.0,0.312	0.0,1.0,NA	-0.344
2715	53379	Hnrnpa2b1	NC_000072.7	-	51438962	51440234	51438962	51439035	51440390	51440473	2715	293033353624	128,81,77	302027603499	184176183	1348	149	2.45947e-07	4.79349e-06	0.717,0.82,0.839	0.645,0.634,0.679	0.139
8883	17965	Nbl1	NC_000070.7	-	138819354	138819729	138819354	138819594	138820137	138820349	8883	3,3,3	0,0,1	2,1,1	1,2,5	284	149	2.54732e-07	4.94811e-06	1.0,1.0,0.611	0.512,0.208,0.095	0.599
9720	70951	Spata1	NC_000069.7	-	146181948	146182057	146181948	146181994	146186882	146186964	9720	3,6,6	0,2,0	4,14,3	3,3,1	212	149	2.56045e-07	4.95704e-06	1.0,0.678,1.0	0.484,0.766,0.678	0.25
7852	54630	Prickle3	NC_000086.8	+	7529409	7529817	7529703	7529817	7525774	7525958	7852	40,68,61	6,36,29	56,35,35	33,29,52	443	149	2.7372e-07	5.28162e-06	0.692,0.388,0.414	0.363,0.289,0.185	0.219
1805	17260	Mef2c	NC_000079.7	+	83810425	83815197	83810521	83815197	83804335	83804471	1805	74145140	35,67,46	81,45,75	59,43,74	245	149	2.76784e-07	5.32306e-06	0.563,0.568,0.649	0.455,0.389,0.381	0.185
8044	269037	Ctif	NC_000084.7	-	75652809	75653178	75652809	75653109	75654447	75654940	8044	16,9,14	21,21,15	15,9,17	11,13,12	218	149	3.01185e-07	5.77322e-06	0.342,0.227,0.389	0.482,0.321,0.492	-0.112
621	503610	Zdhhc18	NC_000070.7	-	133333382	133334081	133333382	133333891	133335984	133336084	621	9,13,17	9,7,3	11,14,9	11,13,14	339	149	3.44469e-07	6.58118e-06	0.305,0.449,0.714	0.305,0.321,0.22	0.207
3156	69806	Slc39a11	NC_000077.7	-	113452831	113452950	113452831	113452947	113540767	113540918	3156	6,1,2	0,3,0	0,0,0	4,0,0	152	149	4.62924e-07	8.81529e-06	1.0,0.246,1.0	0.0,NA,NA	0.749
166	230861	Eif4g3	NC_000070.7	+	137810203	137810299	137810224	137810299	137772653	137772729	166	2,39,21	0,3,1	34,23,49	4,8,14	170	149	5.31317e-07	1.00846e-05	1.0,0.919,0.948	0.882,0.716,0.754	0.172
8523	78779	Spata2l	NC_000074.7	-	123962256	123962588	123962256	123962560	123962888	123962997	8523	0,2,2	0,2,0	6,2,19	0,4,9	177	149	5.44437e-07	1.03e-05	NA,0.457,1.0	1.0,0.296,0.64	0.083
753	57783	Tnip1	NC_000077.7	-	54801612	54802397	54801612	54802323	54806322	54806413	753	31,16,7	21,26,29	14,9,11	25,24,32	223	149	5.46593e-07	1.03072e-05	0.497,0.291,0.139	0.272,0.2,0.187	0.089
10151	668525	Gm9222	NC_000078.7	+	17984855	17985254	17985148	17985254	17983373	17983757	10151	3,30,8	10,8,0	5,16,18	2,2,0	442	149	6.16447e-07	1.15868e-05	0.092,0.558,1.0	0.457,0.729,1.0	-0.179
9428	230895	Vps13d	NC_000070.7	-	144826534	144826640	144826534	144826637	144830183	144830258	9428	0,1,4	2,7,8	0,1,0	1,14,8	152	149	6.19408e-07	1.16049e-05	0.0,0.123,0.329	0.0,0.065,0.0	0.129
4668	66320	Tmem208	NC_000074.7	+	106055221	106055324	106055239	106055324	106054953	106055116	4668	1,1,0	5,1,3	4,1,0	2,6,0	167	149	6.34201e-07	1.18439e-05	0.151,0.472,0.0	0.641,0.129,NA	-0.177
10092	14709	Gng8	NC_000073.7	+	16628583	16628952	16628866	16628952	16627045	16627144	10092	3,0,3	1,1,5	1,0,1	0,0,0	432	149	6.83346e-07	1.27207e-05	0.509,0.0,0.171	1.0,NA,1.0	-0.773
10219	219150	Hmbox1	NC_000080.7	-	65063049	65063144	65063049	65063138	65064220	65064316	10219	25,30,17	4,6,11	17,18,13	1,1,6	155	149	7.46079e-07	1.38442e-05	0.857,0.828,0.598	0.942,0.945,0.676	-0.093
8957	17888	Myh6	NC_000080.7	-	55203223	55203356	55203223	55203292	55204010	55204064	8957	22,5,8	0,0,0	9028905710633	188416812073	213	149	7.93295e-07	1.46734e-05	1.0,1.0,1.0	0.77,0.79,0.782	0.219
5926	234915	Cep126	NC_000075.7	-	8076467	8078359	8076467	8076947	8079495	8079560	5926	20,21,29	0,4,3	41,12,26	9,1,5	1561	149	9.21954e-07	1.69991e-05	1.0,0.334,0.48	0.303,0.534,0.332	0.215
7027	235134	Nfrkb	NC_000075.7	+	31314309	31314370	31314312	31314370	31313530	31313574	7027	28,14,10	4,6,2	10,11,16	2,0,0	152	149	9.66486e-07	1.77638e-05	0.873,0.696,0.831	0.831,1.0,1.0	-0.144
6221	231600	Chfr	NC_000071.7	+	110311594	110311959	110311871	110311959	110310576	110310647	6221	25,21,7	21,9,15	7,6,14	9,13,18	426	149	1.01392e-06	1.85767e-05	0.294,0.449,0.14	0.214,0.139,0.214	0.105
7266	216705	Clint1	NC_000077.7	+	45798666	45798871	45798720	45798871	45797007	45797294	7266	37,58,40	96,76,78	51,47,51	55,71,62	203	149	1.07596e-06	1.96514e-05	0.221,0.359,0.273	0.405,0.327,0.376	-0.085
7736	16194	Il6ra	NC_000069.7	-	89786155	89786202	89786155	89786199	89793208	89793350	7736	2,0,6	1,4,1	1,2,6	1,6,8	152	149	1.1209e-06	2.04081e-05	0.662,0.0,0.855	0.495,0.246,0.424	0.117
10133	54153	Rasa4	NC_000071.7	+	136132400	136132860	136132690	136132860	136132133	136132278	10133	1,7,0	20,16,9	4,6,2	8,5,6	439	149	1.18625e-06	2.15304e-05	0.017,0.129,0.0	0.145,0.289,0.102	-0.13
499	236082	Dhrsx	NC_000070.7	+	156408304	156408564	156408356	156408564	156405277	156405346	499	3,8,6	11,6,9	0,1,0	6,10,10	201	149	1.25011e-06	2.26188e-05	0.168,0.497,0.331	0.0,0.069,0.0	0.309
2375	76899	Golga1	NC_000068.8	-	38908350	38909088	38908350	38908501	38909494	38909665	2375	59,51,30	4,1,5	44,31,46	1,2,1	736	149	1.40279e-06	2.53025e-05	0.749,0.912,0.548	0.899,0.758,0.903	-0.117
1871	72615	Anks3	NC_000082.7	-	4759315	4759851	4759315	4759661	4760074	4760158	1871	3,19,24	4,1,1	20,9,15	14,1,9	339	149	1.67204e-06	3.00657e-05	0.248,0.893,0.913	0.386,0.798,0.423	0.149
7106	22720	Zfp62	NC_000077.7	+	49105352	49105481	49105381	49105481	49104416	49104469	7106	8,6,7	2,3,0	3,3,4	7,4,2	178	149	1.6982e-06	3.04417e-05	0.77,0.626,1.0	0.264,0.386,0.626	0.373
1368	26385	Grk6	NC_000079.7	+	55607145	55608740	55607596	55608740	55606825	55606960	1368	41,43,39	8,7,7	42,47,50	14,10,15	600	149	1.79693e-06	3.21126e-05	0.56,0.604,0.58	0.427,0.539,0.453	0.108
2301	277414	Trp53i11	NC_000068.8	+	93027806	93028093	93027953	93028093	93027241	93027323	2301	71,33,32	29,12,11	24,27,30	7,4,6	296	149	1.80869e-06	3.22235e-05	0.552,0.581,0.594	0.633,0.773,0.716	-0.132
912	16450	Jag2	NC_000078.7	-	112877235	112877396	112877235	112877315	112877555	112877669	912	29,11,21	1,12,0	23,12,19	2,0,0	230	149	1.82432e-06	3.24027e-05	0.949,0.373,1.0	0.882,1.0,1.0	-0.187
2655	14593	Ggps1	NC_000079.7	-	14233903	14235592	14233903	14234042	14237790	14238319	2655	85,87,125	1,7,10	79,65,65	0,1,4	1699	149	1.84912e-06	3.27429e-05	0.882,0.522,0.523	1.0,0.851,0.588	-0.171
352	69232	Qrich1	NC_000075.7	+	108395901	108396025	108395965	108396025	108394009	108395175	352	17,4,8	22,6,12	7,18,14	12,1,9	213	149	1.87177e-06	3.29432e-05	0.351,0.318,0.318	0.29,0.926,0.521	-0.25
4851	71693	Colec11	NC_000078.7	-	28644170	28645065	28644170	28645047	28645242	28645338	4851	0,1,0	23,20,30	5,9,14	36,39,25	167	149	1.86761e-06	3.29432e-05	0.0,0.043,0.0	0.11,0.171,0.333	-0.19
1478	12790	Cnga3	NC_000067.7	+	37293037	37293145	37293040	37293145	37283913	37284093	1478	5,2,3	2,0,0	3,6,1	0,2,6	152	149	1.88906e-06	3.3147e-05	0.71,1.0,1.0	1.0,0.746,0.14	0.275
861	76025	Cant1	NC_000077.7	-	118308399	118308632	118308399	118308605	118309755	118309971	861	2,2,2	1,0,8	4,3,6	2,0,0	176	149	2.11402e-06	3.69826e-05	0.629,1.0,0.175	0.629,1.0,1.0	-0.275
6746	106504	Stk38	NC_000083.7	-	29218982	29219118	29218982	29219115	29226684	29226969	6746	15,18,14	41,54,47	14,16,3	67,65,65	152	149	2.31063e-06	4.03007e-05	0.264,0.246,0.226	0.17,0.194,0.043	0.11
4549	320244	Ttll5	NC_000078.7	+	85965678	85966011	85965704	85966011	85964448	85964606	4549	3,2,4	10,23,8	1,0,3	14,20,9	175	149	2.43704e-06	4.23781e-05	0.203,0.069,0.299	0.057,0.0,0.221	0.098
10602	57438	Marchf7	NC_000068.8	+	60077831	60079555	60078233	60079555	60075555	60075604	10602	121,65,56	44,52,64	58,65,62	33,7,20	551	149	2.56776e-06	4.4518e-05	0.426,0.253,0.191	0.322,0.715,0.456	-0.208
1032	12236	Bub1b	NC_000068.8	+	118453547	118453666	118453550	118453666	118452615	118452728	1032	0,5,0	1,0,0	0,0,0	1,1,1	152	149	2.69937e-06	4.65221e-05	0.0,1.0,NA	0.0,0.0,0.0	0.5
7110	26412	Map4k2	NC_000085.7	+	6391796	6391864	6391799	6391864	6391488	6391546	7110	3,3,0	0,4,0	6,5,1	1,1,1	152	149	2.69579e-06	4.65221e-05	1.0,0.424,NA	0.855,0.831,0.495	-0.015
1987	224432	Scaf4	NC_000082.7	-	90039414	90039606	90039414	90039540	90039759	90039846	1987	25,35,28	6,22,25	5,18,36	15,20,17	215	149	2.87486e-06	4.94e-05	0.743,0.524,0.437	0.188,0.384,0.595	0.179
8320	67843	Slc35a4	NC_000084.7	+	36813480	36813667	36813568	36813667	36812267	36812676	8320	7,19,9	22,48,39	33,32,20	46,45,48	237	149	3.00014e-06	5.14006e-05	0.167,0.199,0.127	0.311,0.309,0.208	-0.112
1299	239652	Zfp641	NC_000081.7	-	98189051	98189181	98189051	98189139	98190766	98190858	1299	10,6,14	7,4,6	2,5,14	1,0,0	191	149	3.12472e-06	5.33775e-05	0.527,0.539,0.645	0.609,1.0,1.0	-0.299
4180	72831	Dhx30	NC_000075.7	-	109944103	109944229	109944103	109944223	109944558	109944650	4180	18,25,25	0,1,1	25,21,24	6,10,7	155	149	4.26293e-06	7.26073e-05	1.0,0.96,0.96	0.8,0.669,0.767	0.228
93	21843	Tial1	NC_000073.7	-	128048454	128048831	128048454	128048522	128049844	128049932	93	49,81,61	7,7,6	27,21,36	10,12,11	458	149	4.4198e-06	7.5059e-05	0.695,0.79,0.768	0.468,0.363,0.516	0.302
5612	67116	Cuedc2	NC_000085.7	-	46319984	46320112	46319984	46320058	46320195	46320257	5612	134,120,89	84,72,52	99,81,96	23,35,62	203	149	4.449e-06	7.53347e-05	0.539,0.55,0.557	0.76,0.629,0.532	-0.092
6130	208777	Sned1	NC_000067.7	+	93209329	93209487	93209373	93209487	93208958	93209072	6130	0,0,0	1,3,0	7,4,2	6,6,5	193	149	4.69775e-06	7.93155e-05	0.0,0.0,NA	0.474,0.34,0.236	-0.35
8625	101471	Phrf1	NC_000073.7	+	140812331	140812454	140812334	140812454	140811139	140811255	8625	45,45,51	13,10,8	35,27,51	18,16,18	152	149	5.63557e-06	9.48735e-05	0.772,0.815,0.862	0.656,0.623,0.735	0.145
387	72960	Top1mt	NC_000081.7	-	75541135	75541323	75541135	75541320	75541910	75542033	387	3,12,8	0,0,2	6,10,17	1,0,5	152	149	5.71186e-06	9.588e-05	1.0,1.0,0.797	0.855,1.0,0.769	0.058
1034	232811	Kmt5c	NC_000073.7	+	4745489	4745727	4745617	4745727	4745120	4745286	1034	4,7,4	1,2,8	4,3,6	11,17,18	277	149	5.90471e-06	9.88317e-05	0.683,0.653,0.212	0.164,0.087,0.152	0.382
7805	67203	Nde1	NC_000082.7	+	14009453	14010792	14009581	14010792	14007950	14008096	7805	17,27,19	35,38,32	11,9,10	37,18,29	277	149	5.9606e-06	9.94803e-05	0.207,0.277,0.242	0.138,0.212,0.156	0.073
2593	66978	Luc7l	NC_000083.7	+	26472947	26474099	26474004	26474099	26471883	26472065	2593	568371410	0,7,0	307255393	8,9,14	1206	149	6.18266e-06	0.000102891	1.0,0.868,1.0	0.826,0.778,0.776	0.163
1868	17692	Msl3	NC_000086.8	-	167453215	167453307	167453215	167453304	167454138	167454239	1868	45,98,87	3,14,11	53,101,71	20,13,22	152	149	6.42804e-06	0.000106669	0.936,0.873,0.886	0.722,0.884,0.76	0.11
1781	75410	Kmt2b	NC_000073.7	-	30270125	30270266	30270125	30270263	30273384	30273491	1781	5,4,6	31,13,19	1,2,4	21,16,21	152	149	6.46438e-06	0.000106966	0.137,0.232,0.236	0.045,0.109,0.157	0.098
3007	18739	Pitpnm1	NC_000085.7	+	4162661	4162876	4162747	4162876	4162326	4162510	3007	10,5,1	45,27,26	0,0,2	23,3,15	235	149	6.71358e-06	0.000110774	0.123,0.105,0.024	0.0,0.0,0.078	0.058
8086	245944	Vps54	NC_000077.7	+	21214629	21214871	21214665	21214871	21213198	21213354	8086	37,28,29	60,53,60	20,23,48	38,34,35	185	149	7.1885e-06	0.000118274	0.332,0.298,0.28	0.298,0.353,0.525	-0.089
2862	76614	Immt	NC_000072.7	+	71829713	71829851	71829749	71829851	71828755	71828864	2862	51,42,56	2,3,6	30,43,28	12,5,2	185	149	8.30016e-06	0.000136179	0.954,0.919,0.883	0.668,0.874,0.919	0.098
3126	320091	Ano4	NC_000076.7	-	88920408	88920559	88920408	88920515	88924054	88924155	3126	2,0,0	3,3,3	2,1,1	1,2,3	193	149	9.06104e-06	0.000148244	0.34,0.0,0.0	0.607,0.279,0.205	-0.25
3801	70945	Mmrn1	NC_000072.7	+	60964057	60964210	60964060	60964210	60952801	60954778	3801	4,15,8	1,0,5	11,1,5	0,3,0	152	149	9.30756e-06	0.000151849	0.797,1.0,0.611	1.0,0.246,1.0	0.054
9667	102634926	Gm12426	NC_000070.7	-	47198844	47200255	47198844	47199828	47201008	47206366	9667	6,0,0	0,0,2	0,6,2	0,0,0	576	149	9.91501e-06	0.000161306	1.0,NA,0.0	NA,1.0,1.0	-0.5
5655	56504	Srpk3	NC_000086.8	+	72820572	72820705	72820575	72820705	72820066	72820092	5655	2,6,22	48,55,38	16,10,9	39,23,35	152	149	1.0093e-05	0.000163743	0.039,0.097,0.362	0.287,0.299,0.201	-0.096
1400	24128	Xrn2	NC_000068.8	+	146876749	146876818	146876773	146876818	146871788	146871896	1400	2,1,1	26,68,58	3,9,9	65,60,71	173	149	1.03178e-05	0.000166925	0.062,0.013,0.015	0.038,0.114,0.098	-0.053
8037	233246	Ano5	NC_000073.7	+	51226251	51226421	51226359	51226421	51224425	51224648	8037	2,0,0	0,0,0	11,4,2	7,4,8	257	149	1.05325e-05	0.000169924	1.0,NA,NA	0.477,0.367,0.127	0.676
3789	67636	Etfrf1	NC_000072.7	+	145160247	145160997	145160909	145160997	145156872	145157126	3789	72,68,98	0,6,7	58,95,126	5,12,22	811	149	1.05767e-05	0.000170164	1.0,0.676,0.72	0.681,0.593,0.513	0.203
4531	171580	Mical1	NC_000076.7	+	41355321	41355495	41355390	41355495	41354958	41355063	4531	4,11,7	65,20,30	1,5,6	18,3,3	218	149	1.10485e-05	0.000177264	0.04,0.273,0.138	0.037,0.533,0.578	-0.232
8383	215008	Vezt	NC_000076.7	-	93829378	93829528	93829378	93829516	93836212	93836385	8383	3,0,1	0,1,0	0,0,0	2,0,0	161	149	1.2091e-05	0.000193457	1.0,0.0,1.0	0.0,NA,NA	0.667
9201	98752	Fcrla	NC_000067.7	-	170749790	170749976	170749790	170749973	170755030	170755152	9201	4,0,0	0,0,0	0,0,0	1,0,1	152	149	1.24327e-05	0.000198377	1.0,NA,NA	0.0,NA,0.0	1
9684	435366	Platr25	NC_000079.7	-	62823332	62823468	62823332	62823459	62832646	62833601	9684	1,4,6	0,4,1	3,0,2	1,4,0	158	149	1.28809e-05	0.000204964	1.0,0.485,0.85	0.739,0.0,1.0	0.199
6810	234094	Arhgef10	NC_000074.7	+	14984769	14984846	14984772	14984846	14982356	14982420	6810	36,28,33	0,7,4	31,9,30	2,13,3	152	149	1.29926e-05	0.000206178	1.0,0.797,0.89	0.938,0.404,0.907	0.146
8668	14760	Gpr19	NC_000072.7	-	134846054	134847445	134846054	134847406	134864592	134864824	8668	5,4,2	0,0,9	1,2,0	2,0,2	188	149	1.32832e-05	0.000210215	1.0,1.0,0.15	0.284,1.0,0.0	0.289
9283	105244477	Gm40078	NC_000069.7	+	84148388	84151160	84151002	84151160	84135506	84137278	9283	6,4,0	0,0,0	0,0,2	1,0,0	2763	149	1.40766e-05	0.000222165	1.0,1.0,NA	0.0,NA,1.0	0.5
2878	56495	Get3	NC_000074.7	-	85746388	85746679	85746388	85746602	85750806	85750954	2878	6,4,3	0,0,0	0,0,2	0,5,0	226	149	1.47189e-05	0.000231543	1.0,1.0,1.0	NA,0.0,1.0	0.5
7294	17245	Mdm1	NC_000076.7	+	117983885	117986861	117986726	117986861	117982499	117982876	7294	89,70,58	5,1,0	34,35,31	0,0,1	2990	149	1.47779e-05	0.000231543	0.47,0.777,1.0	1.0,1.0,0.607	-0.12
7414	240041	Zfp945	NC_000083.7	-	23080479	23080826	23080479	23080535	23084220	23084310	7414	41,28,43	5,26,29	17,15,38	45,30,27	440	149	1.47903e-05	0.000231543	0.735,0.267,0.334	0.113,0.145,0.323	0.252
353	69232	Qrich1	NC_000075.7	+	108395901	108396025	108395965	108396025	108394009	108394451	353	17,4,8	0,6,9	5,14,13	0,3,0	213	149	1.60236e-05	0.000250175	1.0,0.318,0.383	1.0,0.766,1.0	-0.355
4410	56790	Supt20	NC_000069.7	+	54624058	54625066	54624759	54625066	54622954	54623110	4410	184187177	2,1,2	120,89,157	4,2,8	850	149	1.62954e-05	0.000253737	0.942,0.97,0.939	0.84,0.886,0.775	0.117
4438	60527	Fads3	NC_000085.7	+	10031801	10032030	10031910	10032030	10031590	10031713	4438	18,9,9	8,1,3	10,16,6	5,1,0	258	149	1.67159e-05	0.000259587	0.565,0.839,0.634	0.536,0.902,1.0	-0.133
619	52609	Cbx7	NC_000081.7	-	79802953	79803128	79802953	79803026	79805572	79805639	619	10,18,27	27,48,51	5,5,9	30,22,24	251	149	1.74921e-05	0.000270917	0.18,0.182,0.239	0.09,0.119,0.182	0.07
5219	224454	Zdhhc14	NC_000083.7	+	5796373	5804086	5803011	5804086	5781746	5781849	5219	109101198	4,0,11	84,44,85	4,10,8	6787	149	1.78961e-05	0.000276438	0.374,1.0,0.283	0.316,0.088,0.189	0.355
4275	382252	Bclaf3	NC_000086.8	+	158340438	158340553	158340441	158340553	158338470	158338646	4275	29,10,15	9,2,2	4,7,3	8,3,4	152	149	1.82046e-05	0.000280457	0.76,0.831,0.88	0.329,0.696,0.424	0.341
1563	14265	Fmr1	NC_000086.8	+	67755872	67756019	67755911	67756019	67754189	67754385	1563	8,7,10	8,6,0	4,6,8	3,0,0	188	149	1.86793e-05	0.000287009	0.442,0.48,1.0	0.514,1.0,1.0	-0.197
6430	328265	A530001N23Rik	NC_000079.7	-	60631734	60632822	60631734	60632493	60633180	60633353	6430	1,0,1	0,0,4	0,1,3	0,0,0	478	149	1.89467e-05	0.000290349	1.0,NA,0.072	NA,1.0,1.0	-0.464
10461	57913	Pidd1	NC_000073.7	-	141021524	141021773	141021524	141021697	141022063	141022477	10461	0,2,0	0,0,2	2,0,2	0,0,0	225	149	2.07877e-05	0.000317723	NA,1.0,0.0	1.0,NA,1.0	-0.5
10421	68099	Cibar1	NC_000070.7	-	12166843	12166937	12166843	12166922	12168222	12168324	10421	0,2,0	0,0,3	0,0,1	0,0,0	164	149	2.08688e-05	0.000318126	NA,1.0,0.0	NA,NA,1.0	-0.5
2626	408067	Zfp874b	NC_000079.7	-	67629837	67629976	67629837	67629964	67632339	67634360	2626	0,1,0	0,0,0	0,0,2	0,3,2	161	149	2.12658e-05	0.000323329	NA,1.0,NA	NA,0.0,0.481	0.76
4103	170643	Kirrel	NC_000069.7	-	87048283	87048429	87048283	87048426	87081702	87081844	4103	12,6,7	3,4,4	12,4,4	2,7,7	152	149	2.14306e-05	0.000324985	0.797,0.595,0.632	0.855,0.359,0.359	0.15
2993	60504	Il21r	NC_000073.7	+	125226002	125226254	125226054	125226254	125224436	125224539	2993	0,0,0	0,0,2	0,0,2	1,0,0	201	149	2.16028e-05	0.000326742	NA,NA,0.0	0.0,NA,1.0	-0.5
10422	68099	Cibar1	NC_000070.7	-	12166843	12166931	12166843	12166922	12168222	12168324	10422	0,2,0	0,0,3	0,0,1	0,0,0	158	149	2.16707e-05	0.000326918	NA,1.0,0.0	NA,NA,1.0	-0.5
10459	57913	Pidd1	NC_000073.7	-	141021524	141021734	141021524	141021697	141022063	141022477	10459	0,0,0	0,0,2	4,0,2	0,0,0	186	149	2.20276e-05	0.000331441	NA,NA,0.0	1.0,NA,1.0	-1
10655	74246	Gale	NC_000070.7	+	135693564	135693857	135693680	135693857	135693313	135693427	10655	4,0,2	0,0,2	0,1,0	1,0,0	265	149	2.21705e-05	0.00033273	1.0,NA,0.36	0.0,1.0,NA	0.18
10157	217325	Llgl2	NC_000077.7	+	115745885	115745931	115745888	115745931	115745372	115745401	10157	2,0,0	0,3,1	0,1,0	0,0,0	152	149	2.25044e-05	0.000333433	1.0,0.0,0.0	NA,1.0,NA	-0.667
1732	14302	Frk	NC_000076.7	+	34359740	34360365	34359744	34360365	34359395	34359584	1732	0,0,1	0,0,0	2,0,0	1,0,3	153	149	2.23633e-05	0.000333433	NA,NA,1.0	0.661,NA,0.0	0.669
4988	105246237	Gm41549	NC_000083.7	-	25085504	25086599	25085504	25086377	25091026	25091100	4988	6,3,3	0,1,0	0,0,2	1,1,0	371	149	2.23592e-05	0.000333433	1.0,0.546,1.0	0.0,0.0,1.0	0.515
7005	69657	2310047D07Rik	NC_000071.7	+	149174343	149174787	149174346	149174787	149174048	149174237	7005	0,0,0	0,0,3	1,0,1	1,1,0	152	149	2.25044e-05	0.000333433	NA,NA,0.0	0.495,0.0,1.0	-0.498
7104	22720	Zfp62	NC_000077.7	+	49105049	49105481	49105352	49105481	49104416	49104469	7104	50,35,15	0,2,5	13,15,7	0,2,4	452	149	2.24287e-05	0.000333433	1.0,0.852,0.497	1.0,0.712,0.366	0.09
2906	268445	Ankrd13b	NC_000077.7	-	77361310	77362919	77361310	77362649	77363127	77363204	2906	16,13,12	5,7,16	21,18,8	5,1,1	419	149	2.2731e-05	0.000335933	0.532,0.398,0.211	0.599,0.865,0.74	-0.354
812	545085	Wdr70	NC_000081.7	-	8108643	8108848	8108643	8108756	8111945	8112066	812	19,27,19	1,7,7	21,21,7	0,1,4	241	149	2.28042e-05	0.00033616	0.922,0.705,0.627	1.0,0.928,0.52	-0.065
1937	233056	Zfp790	NC_000073.7	+	29522404	29522569	29522494	29522569	29515496	29515714	1937	43,34,30	0,4,4	31,20,26	5,5,5	239	149	2.31111e-05	0.000337563	1.0,0.841,0.824	0.794,0.714,0.764	0.131
3963	20927	Abcc8	NC_000073.7	-	45776208	45776241	45776208	45776238	45784904	45785010	3963	16,30,23	10,12,4	25,20,18	2,4,0	152	149	2.31189e-05	0.000337563	0.611,0.71,0.849	0.925,0.831,1.0	-0.195
4270	71687	Tmem25	NC_000075.7	-	44709960	44710057	44709960	44710054	44710477	44710775	4270	0,0,2	0,2,1	2,4,2	7,6,2	152	149	2.2969e-05	0.000337563	NA,0.0,0.662	0.219,0.395,0.495	-0.039
9146	546071	Mast3	NC_000074.7	-	71242491	71242564	71242491	71242561	71242640	71242729	9146	9,0,14	9,1,3	3,9,9	0,0,6	152	149	2.31319e-05	0.000337563	0.495,0.0,0.821	1.0,1.0,0.595	-0.426
1562	14265	Fmr1	NC_000086.8	+	67755836	67756019	67755872	67756019	67754189	67754385	1562	10,17,20	8,7,9	14,16,16	1,6,7	185	149	2.33282e-05	0.000338359	0.502,0.662,0.642	0.919,0.682,0.648	-0.148
6881	16427	Itih4	NC_000080.7	+	30619479	30619530	30619482	30619530	30618514	30618727	6881	0,3,0	0,0,0	0,0,0	1,1,10	152	149	2.33612e-05	0.000338359	NA,1.0,NA	0.0,0.0,0.0	1
7216	16438	Itpr1	NC_000072.7	+	108409606	108409657	108409609	108409657	108394849	108394961	7216	0,0,0	1,0,0	3,0,0	0,0,1	152	149	2.33612e-05	0.000338359	0.0,NA,NA	1.0,NA,0.0	-0.5
5542	54380	Smarcal1	NC_000067.7	+	72625826	72626260	72626209	72626260	72624796	72625563	5542	9,19,20	15,54,48	10,3,7	54,44,41	532	149	2.36277e-05	0.000340717	0.144,0.09,0.105	0.049,0.019,0.046	0.075
7227	214922	Slc39a2	NC_000080.7	+	52131912	52131963	52131917	52131963	52131545	52131676	7227	4,0,0	0,0,1	0,1,3	0,0,0	154	149	2.36413e-05	0.000340717	1.0,NA,0.0	NA,1.0,1.0	-0.5
6396	227937	Pkp4	NC_000068.8	+	59138428	59138901	59138433	59138901	59135648	59135836	6396	20,40,31	6,7,11	21,11,17	0,0,5	154	149	2.37428e-05	0.000340928	0.763,0.847,0.732	1.0,1.0,0.767	-0.142
6981	102635432	Gm32771	NC_000085.7	-	38255306	38256972	38255306	38255362	38257691	38260957	6981	7,2,2	0,0,0	0,0,0	0,0,1	1759	149	2.37734e-05	0.000340928	1.0,1.0,1.0	NA,NA,0.0	1
10260	240057	Syngap1	NC_000083.7	+	27183800	27184012	27183806	27184012	27181887	27182061	10260	9,7,2	4,0,2	4,2,2	1,4,1	155	149	2.5255e-05	0.000361283	0.684,1.0,0.49	0.794,0.325,0.658	0.132
8633	320678	Iffo1	NC_000072.7	+	125129406	125129734	125129576	125129734	125128347	125128488	8633	25,8,11	8,11,14	17,5,17	4,5,9	319	149	2.57111e-05	0.000366905	0.593,0.254,0.268	0.665,0.318,0.469	-0.112
2718	231807	Map11	NC_000071.7	-	138259814	138260000	138259814	138259978	138260063	138260146	2718	0,3,0	0,0,1	0,0,0	0,1,0	171	149	2.5856e-05	0.000368067	NA,1.0,0.0	NA,0.0,NA	0.5
10443	114713	Rasa2	NC_000075.7	-	96439452	96442547	96439452	96439530	96442750	96442834	10443	106,55,52	21,10,13	32,30,33	18,12,6	3166	149	2.62762e-05	0.000373135	0.192,0.206,0.158	0.077,0.105,0.206	0.056
1433	59026	Huwe1	NC_000086.8	+	150589267	150589403	150589271	150589403	150586171	150586565	1433	12,14,4	26,0,8	7,9,12	10,0,7	153	149	2.68389e-05	0.000380196	0.31,1.0,0.327	0.405,1.0,0.625	-0.131
6982	102635432	Gm32771	NC_000085.7	-	38255306	38256629	38255306	38255362	38257691	38260957	6982	4,4,2	0,0,0	0,0,0	0,0,1	1416	149	2.75533e-05	0.000389366	1.0,1.0,1.0	NA,NA,0.0	1
8721	21973	Top2a	NC_000077.7	-	98886069	98886204	98886069	98886201	98886506	98886550	8721	1,0,0	0,0,1	0,2,6	0,0,0	152	149	2.81073e-05	0.000396231	1.0,NA,0.0	NA,1.0,1.0	-0.5
6473	30839	Fbxw5	NC_000068.8	+	25392868	25393057	25392882	25393057	25391947	25392163	6473	10,3,8	7,2,0	1,4,6	2,3,5	163	149	2.82762e-05	0.000396687	0.566,0.578,1.0	0.314,0.549,0.523	0.253
8887	27049	Etv3	NC_000069.7	+	87434564	87434623	87434567	87434623	87432884	87432966	8887	15,27,16	16,39,30	17,20,21	22,21,14	152	149	2.82642e-05	0.000396687	0.479,0.404,0.343	0.431,0.483,0.595	-0.094
8540	18711	Pikfyve	NC_000067.7	+	65231689	65231725	65231692	65231725	65231303	65231453	8540	8,9,10	5,3,13	19,7,14	3,2,9	152	149	2.84169e-05	0.0003977	0.611,0.746,0.43	0.861,0.774,0.604	-0.151
3356	213084	Cdkl3	NC_000077.7	+	51931387	51931447	51931390	51931447	51924340	51924438	3356	0,0,5	0,0,0	1,0,0	0,0,1	152	149	2.8635e-05	0.00039883	NA,NA,1.0	1.0,NA,0.0	0.5
3825	18717	Pip5k1c	NC_000076.7	+	81149568	81149927	81149828	81149927	81149453	81149486	3825	32,20,15	31,32,63	10,6,16	45,25,43	409	149	2.86292e-05	0.00039883	0.273,0.185,0.08	0.075,0.08,0.119	0.088
6568	72895	Setd5	NC_000072.7	+	113087277	113087486	113087334	113087486	113086845	113086951	6568	38,42,32	74,39,45	32,35,45	47,25,37	206	149	2.91164e-05	0.000404565	0.271,0.438,0.34	0.33,0.503,0.468	-0.084
1912	102638667	Gm35177	NC_000075.7	+	40470980	40471156	40470986	40471156	40469192	40469299	1912	1,1,0	0,0,0	0,0,3	5,0,0	155	149	2.93179e-05	0.000406392	1.0,1.0,NA	0.0,NA,1.0	0.5
6261	74131	Sash3	NC_000086.8	+	47248939	47250442	47248942	47250442	47248280	47248431	6261	1,0,0	1,7,0	0,1,0	0,0,0	152	149	2.96165e-05	0.000409553	0.495,0.0,NA	NA,1.0,NA	-0.752
8132	240753	Plekha6	NC_000067.7	+	133222300	133226781	133226657	133226781	133221691	133221825	8132	8621023648	0,2,1	585509601	7,4,2	4506	149	3.11936e-05	0.000430338	1.0,0.944,0.955	0.734,0.808,0.909	0.149
1243	16331	Inpp5d	NC_000067.7	+	87642982	87643035	87642998	87643035	87642759	87642815	1243	0,0,1	0,0,0	0,0,0	3,0,4	165	149	3.1817e-05	0.000436515	NA,NA,1.0	0.0,NA,0.0	1
423	73225	Fam118a	NC_000081.7	+	84945729	84947031	84945732	84947031	84943589	84943671	423	3,0,0	0,0,0	1,0,1	6,0,0	152	149	3.17981e-05	0.000436515	1.0,NA,NA	0.14,NA,1.0	0.43
5181	102635305	Gm15991	NC_000074.7	+	68425225	68425435	68425240	68425435	68402757	68409780	5181	0,0,0	3,1,1	1,6,2	2,4,2	164	149	3.18668e-05	0.000436515	0.0,0.0,0.0	0.312,0.577,0.476	-0.455
8497	53627	Porcn	NC_000086.8	-	8064213	8065143	8064213	8064324	8065305	8065391	8497	13,8,6	0,7,5	0,3,5	1,5,4	968	149	3.37263e-05	0.0004609	1.0,0.15,0.156	0.0,0.085,0.161	0.353
4954	100072	Camta1	NC_000070.7	-	151168133	151168657	151168133	151168318	151169019	151169335	4954	353399340	75,79,61	219191228	104,57,93	488	149	3.48793e-05	0.000474424	0.59,0.607,0.63	0.391,0.506,0.428	0.167
8270	102631739	Gm30003	NC_000071.7	+	134803265	134803794	134803347	134803794	134774303	134776162	8270	0,0,1	0,2,0	1,0,0	0,0,4	231	149	3.48284e-05	0.000474424	NA,0.0,1.0	1.0,NA,0.0	0
5012	59056	Evc	NC_000071.7	-	37456514	37457877	37456514	37457805	37458155	37458267	5012	4,4,0	0,7,7	1,1,2	3,1,2	221	149	3.54812e-05	0.000481483	1.0,0.278,0.0	0.183,0.403,0.403	0.096
7195	116848	Baz2a	NC_000076.7	+	127932248	127932392	127932307	127932392	127928328	127928719	7195	4,4,2	6,7,8	2,4,7	5,7,2	208	149	3.66653e-05	0.000496391	0.323,0.29,0.152	0.223,0.29,0.715	-0.154
9711	78795	Armc9	NC_000067.7	+	86202650	86205557	86203381	86205557	86202104	86202277	9711	0,1,8	1,0,0	2,0,0	0,0,0	880	149	3.68171e-05	0.000497288	0.0,1.0,1.0	1.0,NA,NA	-0.333
4823	19200	Pstpip1	NC_000075.7	+	56029990	56030105	56030042	56030105	56027830	56027937	4823	0,0,0	0,3,2	0,0,1	2,0,0	201	149	3.69077e-05	0.000497355	NA,0.0,0.0	0.0,NA,1.0	-0.5
10261	66610	Abi3	NC_000077.7	-	95724465	95724626	95724465	95724623	95724828	95724924	10261	17,15,30	0,1,5	21,22,22	3,1,9	152	149	3.76143e-05	0.000505703	1.0,0.936,0.855	0.873,0.956,0.706	0.085
8673	329470	Accs	NC_000068.8	-	93678261	93678534	93678261	93678531	93680109	93680338	8673	1,6,3	1,7,3	7,7,2	2,2,0	152	149	3.83462e-05	0.000513168	0.495,0.457,0.495	0.774,0.774,1.0	-0.367
9086	211712	Pcdh9	NC_000080.7	-	93564114	93564316	93564114	93564190	93797911	93798013	9086	1,2,0	0,1,1	0,0,0	3,0,0	275	149	3.83156e-05	0.000513168	1.0,0.52,0.0	0.0,NA,NA	0.507
6879	78611	Btbd19	NC_000070.7	-	116979415	116979525	116979415	116979475	116980925	116980979	6879	1,1,0	4,3,0	2,0,1	0,0,0	199	149	3.85104e-05	0.000514181	0.158,0.2,NA	1.0,NA,1.0	-0.821
3796	102635630	Gm32918	NC_000081.7	-	74075234	74075436	74075234	74075333	74076014	74076298	3796	1,1,0	0,4,6	1,7,0	0,0,3	252	149	3.86223e-05	0.000514492	1.0,0.129,0.0	1.0,1.0,0.0	-0.29
3631	278672	Duxbl1	NC_000080.7	+	25981351	25982003	25981986	25982003	25980743	25980945	3631	3,2,1	0,0,0	0,0,0	0,1,0	784	149	3.91197e-05	0.000519925	1.0,1.0,1.0	NA,0.0,NA	1
7776	101869	Unc45a	NC_000073.7	-	79988588	79988907	79988588	79988764	79989061	79989098	7776	10,15,8	34,26,24	21,5,14	22,19,17	292	149	3.94156e-05	0.000522662	0.13,0.227,0.145	0.328,0.118,0.296	-0.08
6146	78070	Cpt1c	NC_000073.7	-	44610181	44610462	44610181	44610433	44610942	44611069	6146	0,1,0	2,0,0	1,0,0	0,0,0	178	149	3.99386e-05	0.000528391	0.0,1.0,NA	1.0,NA,NA	-0.5
2588	223433	Otulinl	NC_000081.7	-	27659975	27660104	27659975	27660076	27662424	27662574	2588	0,0,0	0,0,2	2,5,1	0,0,0	177	149	4.00746e-05	0.000528985	NA,NA,0.0	1.0,1.0,1.0	-1
8098	320742	A230072C01Rik	NC_000086.8	+	20852217	20853588	20852228	20853588	20851664	20851704	8098	1,2,4	0,0,3	2,2,1	0,0,4	160	149	4.11085e-05	0.000541402	1.0,1.0,0.554	1.0,1.0,0.189	0.122
5116	18722	Pira1	NC_000073.7	-	3742170	3742473	3742170	3742455	3742636	3742672	5116	0,1,0	0,0,0	1,0,0	0,2,2	167	149	4.14494e-05	0.000544657	NA,1.0,NA	1.0,0.0,0.0	0.667
5494	26428	Orc4	NC_000068.8	-	48800197	48800306	48800197	48800257	48802573	48802660	5494	37,32,56	2,3,6	38,34,40	0,0,3	198	149	4.19262e-05	0.000549679	0.933,0.889,0.875	1.0,1.0,0.909	-0.071
7289	18806	Pld2	NC_000077.7	+	70441954	70442089	70442005	70442089	70434953	70435103	7289	6,1,2	25,10,5	0,0,1	4,3,0	200	149	4.23404e-05	0.000553858	0.152,0.069,0.23	0.0,0.0,1.0	-0.183
4220	94352	Loxl2	NC_000080.7	+	69904694	69904899	69904697	69904899	69901348	69901571	4220	0,2,0	2,0,0	1,0,1	0,0,0	152	149	4.35457e-05	0.000561033	0.0,1.0,NA	1.0,NA,1.0	-0.5
5109	71101	Uvssa	NC_000071.7	+	33568202	33568386	33568306	33568386	33566770	33566893	5109	17,26,18	0,1,5	9,5,14	2,1,2	253	149	4.35651e-05	0.000561033	1.0,0.939,0.68	0.726,0.746,0.805	0.114
6034	102637828	Gm12519	NC_000070.7	-	55972923	55973111	55972923	55973001	55973656	55974223	6034	22,22,33	4,0,4	13,9,12	2,1,2	259	149	4.32982e-05	0.000561033	0.76,1.0,0.826	0.789,0.838,0.775	0.061
7096	77411	Esrp2	NC_000074.7	-	106860410	106860521	106860410	106860518	106860591	106860646	7096	8,0,0	0,2,0	0,1,1	0,0,0	152	149	4.35457e-05	0.000561033	1.0,0.0,NA	NA,1.0,1.0	-0.5
7114	68971	Tamm41	NC_000072.7	-	114989118	114989284	114989118	114989280	115002234	115002385	7114	1,0,4	0,2,1	0,1,0	0,0,0	153	149	4.34054e-05	0.000561033	1.0,0.0,0.796	NA,1.0,NA	-0.401
7633	102638849	Gm15764	NC_000082.7	+	18240429	18241214	18240432	18241214	18232372	18240037	7633	0,0,1	0,0,0	0,2,0	0,0,2	152	149	4.35457e-05	0.000561033	NA,NA,1.0	NA,1.0,0.0	0.5
778	406217	Bex4	NC_000086.8	+	135040603	135041192	135040606	135041192	135040271	135040348	778	0,1,0	0,0,0	1,0,1	0,2,0	152	149	4.35457e-05	0.000561033	NA,1.0,NA	1.0,0.0,1.0	0.333
10474	15437	Hoxd8	NC_000068.8	+	74536857	74538277	74536860	74538277	74535832	74536462	10474	0,2,0	0,0,0	3,0,0	1,1,1	152	149	4.43783e-05	0.000564003	NA,1.0,NA	0.746,0.0,0.0	0.751
10653	76408	Abcc3	NC_000077.7	-	94250654	94250769	94250654	94250766	94251997	94252175	10653	0,0,2	0,0,0	0,0,0	1,0,1	152	149	4.43783e-05	0.000564003	NA,NA,1.0	0.0,NA,0.0	1
2098	227632	Kcnt1	NC_000068.8	+	25788707	25788847	25788710	25788847	25788282	25788447	2098	0,0,2	0,0,0	0,0,0	1,0,1	152	149	4.43783e-05	0.000564003	NA,NA,1.0	0.0,NA,0.0	1
2448	15574	Hus1	NC_000077.7	-	8957493	8957604	8957493	8957601	8960496	8960624	2448	2,0,0	0,0,0	0,0,0	1,0,2	152	149	4.43783e-05	0.000564003	1.0,NA,NA	0.0,NA,0.0	1
5860	14462	Gata3	NC_000068.8	-	9873571	9873717	9873571	9873714	9879199	9879736	5860	0,2,1	0,0,0	1,0,0	0,1,0	152	149	4.43783e-05	0.000564003	NA,1.0,1.0	1.0,0.0,NA	0.5
9654	229228	Nudt6	NC_000069.7	-	37459130	37459643	37459130	37459640	37470849	37471053	9654	0,0,0	0,1,1	0,2,0	0,0,0	152	149	4.43783e-05	0.000564003	NA,0.0,0.0	NA,1.0,NA	-1
1516	237360	Adamts14	NC_000076.7	-	61047366	61047447	61047366	61047433	61048902	61049026	1516	0,0,0	0,1,0	2,2,1	0,0,0	163	149	4.57471e-05	0.000580129	NA,0.0,NA	1.0,1.0,1.0	-1
2530	58861	Cysltr1	NC_000086.8	-	105624454	105624544	105624454	105624525	105625749	105625836	2530	2,0,0	0,0,0	0,1,0	1,0,0	168	149	4.63006e-05	0.000585869	1.0,NA,NA	0.0,1.0,NA	0.5
8615	74080	Nmnat3	NC_000075.7	+	98236071	98236217	98236074	98236217	98178602	98178785	8615	4,1,9	3,7,12	9,8,10	8,7,9	152	149	4.82153e-05	0.00060877	0.567,0.123,0.424	0.524,0.528,0.521	-0.153
4038	100041677	Zfp984	NC_000070.7	-	147845677	147845782	147845677	147845735	147891546	147891640	4038	4,2,0	0,0,0	0,0,3	0,1,0	196	149	4.87238e-05	0.000613856	1.0,1.0,NA	NA,0.0,1.0	0.5
4824	320685	Dctd	NC_000074.7	+	48591213	48591913	48591816	48591913	48590292	48590409	4824	5,7,6	0,1,5	6,2,3	0,0,0	752	149	4.92378e-05	0.000616322	1.0,0.581,0.192	1.0,1.0,1.0	-0.409
5476	381112	Arhgef33	NC_000083.7	+	80662407	80662632	80662461	80662632	80660108	80660168	5476	3,0,2	0,0,0	0,0,0	0,0,1	203	149	4.91747e-05	0.000616322	1.0,NA,1.0	NA,NA,0.0	1
8441	240038	Zfp994	NC_000083.7	-	22438951	22439061	22438951	22439008	22439248	22439341	8441	0,0,2	0,0,0	1,4,0	1,0,1	202	149	4.91136e-05	0.000616322	NA,NA,1.0	0.425,1.0,0.0	0.525
762	207182	Ggt7	NC_000068.8	-	155345047	155345209	155345047	155345121	155345331	155345399	762	1,0,0	0,0,1	0,0,2	0,0,0	237	149	5.06829e-05	0.000633046	1.0,NA,0.0	NA,NA,1.0	-0.5
6428	403174	Msantd1	NC_000071.7	+	35074870	35075259	35074994	35075259	35071936	35072447	6428	0,0,2	0,1,0	0,0,0	0,0,1	273	149	5.13496e-05	0.000639996	NA,0.0,1.0	NA,NA,0.0	0.5
5667	231430	Cox18	NC_000071.7	-	90366770	90366895	90366770	90366892	90370089	90370194	5667	4,5,0	2,2,2	0,0,0	0,1,0	152	149	5.1745e-05	0.000643543	0.662,0.71,0.0	NA,0.0,NA	0.457
4399	382793	Mtx3	NC_000079.7	+	92985837	92986031	92985932	92986031	92985425	92985583	4399	11,6,12	3,4,3	13,3,8	0,1,0	244	149	5.22878e-05	0.000648906	0.691,0.478,0.71	1.0,0.647,1.0	-0.256
118	106947	Slc39a3	NC_000076.7	-	80870751	80870843	80870751	80870839	80872821	80872945	118	0,0,1	0,0,0	0,0,0	0,1,4	153	149	5.29231e-05	0.000655388	NA,NA,1.0	NA,0.0,0.0	1
2574	100683	Trrap	NC_000071.7	+	144781005	144781099	144781008	144781099	144780013	144780178	2574	6,0,1	78,45,38	3,5,5	30,27,34	152	149	5.476e-05	0.000676694	0.07,0.0,0.025	0.089,0.154,0.126	-0.091
4261	140795	P2ry14	NC_000069.7	-	59022043	59023712	59022043	59023482	59037914	59038183	4261	26,29,13	2,1,0	16,12,15	8,0,8	379	149	6.09379e-05	0.000751438	0.836,0.919,1.0	0.44,1.0,0.424	0.297
476	72344	Usp36	NC_000077.7	-	118176563	118176869	118176563	118176825	118177479	118177597	476	4,1,1	1,2,2	0,0,2	4,7,5	193	149	6.27828e-05	0.000772547	0.755,0.279,0.279	0.0,0.0,0.236	0.359
1822	56195	Ptbp2	NC_000069.7	-	119519714	119519869	119519714	119519854	119533963	119534159	1822	12,7,6	32,27,25	1,1,6	35,18,20	164	149	6.58678e-05	0.000808795	0.254,0.191,0.179	0.025,0.048,0.214	0.112
3086	269389	Tox2	NC_000068.8	+	163164663	163166090	163164863	163166090	163163340	163163468	3086	0,6,11	0,6,1	1,2,4	0,0,0	349	149	6.67811e-05	0.00081828	NA,0.299,0.824	1.0,1.0,1.0	-0.439
7808	15193	Hdgfl2	NC_000083.7	+	56407344	56407605	56407347	56407605	56406858	56406985	7808	67,64,55	34,42,30	66,59,83	22,27,24	152	149	6.78856e-05	0.000830062	0.659,0.599,0.642	0.746,0.682,0.772	-0.1
3161	66254	Dimt1	NC_000079.7	+	107084575	107085295	107085208	107085295	107084093	107084167	3161	23,14,10	13,12,6	17,3,20	2,2,7	782	149	7.04092e-05	0.00085911	0.252,0.182,0.241	0.618,0.222,0.352	-0.172
3740	110454	Ly6a	NC_000081.7	-	74869383	74869481	74869383	74869466	74869696	74869880	3740	1,2,1	2,7,6	6,1,3	12,0,8	164	149	7.14233e-05	0.000869658	0.312,0.206,0.132	0.312,1.0,0.254	-0.305
321	228598	Ebf4	NC_000068.8	+	130207379	130207577	130207495	130207577	130204165	130204351	321	0,2,2	4,0,0	1,0,1	0,0,0	265	149	7.36438e-05	0.000894818	0.0,1.0,1.0	1.0,NA,1.0	-0.333
7678	102636000	Gm33195	NC_000079.7	+	44020073	44022065	44020241	44022065	44018032	44019515	7678	0,3,1	0,0,0	0,0,0	0,0,1	317	149	7.42738e-05	0.000900589	NA,1.0,1.0	NA,NA,0.0	1
1506	319675	Cep295	NC_000075.7	-	15255419	15255588	15255419	15255556	15258236	15258332	1506	0,0,2	0,2,7	0,0,2	1,0,0	181	149	7.49456e-05	0.000901978	NA,0.0,0.19	0.0,NA,1.0	-0.405
320	228598	Ebf4	NC_000068.8	+	130207218	130207577	130207379	130207577	130204165	130204351	320	0,0,0	0,1,1	1,0,1	0,0,0	310	149	7.48605e-05	0.000901978	NA,0.0,0.0	1.0,NA,1.0	-1
7105	22720	Zfp62	NC_000077.7	+	49105049	49105481	49105381	49105481	49104416	49104469	7105	58,39,17	2,3,0	16,16,8	7,4,2	481	149	7.50095e-05	0.000901978	0.9,0.801,1.0	0.415,0.553,0.553	0.393
9858	637515	Nlrp1b	NC_000077.7	-	71062890	71063221	71062890	71063061	71063784	71063955	9858	0,0,0	0,1,1	0,1,0	0,0,0	309	149	7.49445e-05	0.000901978	NA,0.0,0.0	NA,1.0,NA	-1
1279	232969	Zfp428	NC_000073.7	+	24214461	24215105	24214500	24215105	24209970	24210178	1279	0,24,12	16,36,22	13,8,13	10,17,19	188	149	7.54184e-05	0.000905021	0.0,0.346,0.302	0.507,0.272,0.352	-0.161
1952	319601	Zfp653	NC_000075.7	-	21968796	21969012	21968796	21968998	21969099	21969711	1952	6,1,4	0,8,3	2,1,0	4,7,4	163	149	7.68459e-05	0.000920249	1.0,0.103,0.549	0.314,0.116,0.0	0.407
765	207182	Ggt7	NC_000068.8	-	155345331	155345525	155345331	155345399	155346623	155346741	765	0,2,0	0,0,1	0,0,1	0,0,0	275	149	7.77992e-05	0.000929749	NA,1.0,0.0	NA,NA,1.0	-0.5
3866	240641	Kif20b	NC_000085.7	+	34918612	34918841	34918732	34918841	34917492	34917631	3866	1,0,0	0,0,1	0,0,0	1,0,0	269	149	7.82983e-05	0.000933792	1.0,NA,0.0	0.0,NA,NA	0.5
7249	18733	Pirb	NC_000073.7	-	3719032	3719305	3719032	3719216	3719592	3719889	7249	1,1,0	0,0,0	0,0,0	0,1,0	238	149	8.07996e-05	0.000961648	1.0,1.0,NA	NA,0.0,NA	1
1269	93842	Igsf9	NC_000067.7	+	172323476	172323634	172323549	172323634	172323100	172323351	1269	0,1,0	0,0,0	0,0,0	0,1,0	222	149	8.20007e-05	0.000961762	NA,1.0,NA	NA,0.0,NA	1
1343	320135	BC049715	NC_000072.7	+	136807898	136807994	136807901	136807994	136806035	136806215	1343	0,0,0	0,0,1	0,0,1	0,0,0	152	149	8.52755e-05	0.000961762	NA,NA,0.0	NA,NA,1.0	-1
1377	171207	Arhgap4	NC_000086.8	-	72940419	72940621	72940419	72940603	72940686	72940760	1377	3,0,0	0,0,1	0,0,1	0,1,0	167	149	8.50087e-05	0.000961762	1.0,NA,0.0	NA,0.0,1.0	0
1496	242248	Bank1	NC_000069.7	-	135799045	135799354	135799045	135799351	135806041	135806350	1496	0,0,0	1,6,0	1,0,0	0,0,0	152	149	8.52755e-05	0.000961762	0.0,0.0,NA	1.0,NA,NA	-1
155	26386	Hsf4	NC_000074.7	+	106001628	106001744	106001648	106001744	106001479	106001545	155	0,1,0	1,0,0	0,0,0	0,1,0	169	149	8.49484e-05	0.000961762	0.0,1.0,NA	NA,0.0,NA	0.5
2201	57261	Brd4	NC_000083.7	-	32461219	32461433	32461219	32461412	32472014	32472174	2201	0,2,0	1,0,0	1,0,1	0,0,0	170	149	8.49163e-05	0.000961762	0.0,1.0,NA	1.0,NA,1.0	-0.5
2558	17101	Lyst	NC_000079.7	+	13881086	13881263	13881117	13881263	13872911	13873118	2558	20,9,9	0,6,0	11,22,16	0,1,0	180	149	8.52513e-05	0.000961762	1.0,0.554,1.0	1.0,0.948,1.0	-0.131
279	230594	Tut4	NC_000070.7	+	108406425	108406610	108406437	108406610	108405251	108405367	279	22,7,9	34,31,37	7,1,4	19,23,18	161	149	8.16399e-05	0.000961762	0.375,0.173,0.184	0.254,0.039,0.171	0.089
2838	18554	Pcsk7	NC_000075.7	+	45837212	45837365	45837215	45837365	45831089	45831192	2838	0,1,0	1,0,0	1,0,0	0,0,1	152	149	8.52755e-05	0.000961762	0.0,1.0,NA	1.0,NA,0.0	0
3015	76866	Morn1	NC_000070.7	+	155186546	155186657	155186551	155186657	155185722	155185819	3015	2,0,3	1,1,3	0,1,0	0,0,0	154	149	8.52609e-05	0.000961762	0.659,0.0,0.492	NA,1.0,NA	-0.616
3741	110454	Ly6a	NC_000081.7	-	74869383	74869481	74869383	74869466	74869727	74869880	3741	1,2,1	47,90,95	22,1,35	119101158	164	149	8.30459e-05	0.000961762	0.019,0.02,0.009	0.144,0.009,0.168	-0.091
5273	66199	Commd4	NC_000075.7	-	57063185	57063328	57063185	57063295	57063455	57063575	5273	1,0,0	0,1,0	0,0,0	1,0,0	182	149	8.44408e-05	0.000961762	1.0,0.0,NA	0.0,NA,NA	0.5
5274	66199	Commd4	NC_000075.7	-	57063185	57063348	57063185	57063295	57063455	57063575	5274	1,0,0	0,1,0	0,0,0	1,0,0	202	149	8.33501e-05	0.000961762	1.0,0.0,NA	0.0,NA,NA	0.5
601	67171	Dram2	NC_000069.7	+	106462479	106462624	106462482	106462624	106457814	106457991	601	6,0,1	0,1,0	0,1,0	0,0,0	152	149	8.52755e-05	0.000961762	1.0,0.0,1.0	NA,1.0,NA	-0.333
6575	58229	Efcc1	NC_000072.7	+	87727602	87727744	87727605	87727744	87726113	87726259	6575	0,1,1	5,0,0	0,0,0	0,0,1	152	149	8.52755e-05	0.000961762	0.0,1.0,1.0	NA,NA,0.0	0.667
6626	272382	Spib	NC_000073.7	-	44179280	44179418	44179280	44179353	44180646	44181383	6626	0,0,1	0,0,0	0,0,0	0,0,1	214	149	8.25647e-05	0.000961762	NA,NA,1.0	NA,NA,0.0	1
6662	224022	Slc7a4	NC_000082.7	-	17392815	17393832	17392815	17393829	17393944	17394067	6662	0,0,0	1,2,0	1,0,0	0,0,0	152	149	8.52755e-05	0.000961762	0.0,0.0,NA	1.0,NA,NA	-1
6713	17756	Map2	NC_000067.7	+	66459293	66459355	66459296	66459355	66455890	66456025	6713	1,1,0	0,0,0	0,0,0	0,1,0	152	149	8.52755e-05	0.000961762	1.0,1.0,NA	NA,0.0,NA	1
71	109979	Art3	NC_000071.7	+	92480706	92480841	92480757	92480841	92479660	92479771	71	3,1,0	0,2,1	0,0,1	0,0,0	200	149	8.34727e-05	0.000961762	1.0,0.271,0.0	NA,NA,1.0	-0.576
7311	225362	Reep2	NC_000084.7	+	34978997	34979145	34979003	34979145	34978627	34978741	7311	1,1,0	0,0,0	0,0,0	1,0,0	155	149	8.52509e-05	0.000961762	1.0,1.0,NA	0.0,NA,NA	1
8039	72179	Fbxl2	NC_000075.7	-	113813052	113813186	113813052	113813109	113813608	113813653	8039	0,0,0	1,0,1	1,0,0	0,0,0	226	149	8.17087e-05	0.000961762	0.0,NA,0.0	1.0,NA,NA	-1
8041	72179	Fbxl2	NC_000075.7	-	113813052	113813186	113813052	113813184	113813608	113813653	8041	0,0,0	1,0,2	1,0,0	0,0,0	151	149	8.52802e-05	0.000961762	0.0,NA,0.0	1.0,NA,NA	-1
8395	115486954	Gm15889	NC_000074.7	+	95106132	95106945	95106147	95106945	95104502	95104833	8395	0,0,1	0,0,0	0,0,0	0,0,1	164	149	8.50891e-05	0.000961762	NA,NA,1.0	NA,NA,0.0	1
9286	66960	Mindy3	NC_000068.8	-	12405835	12405913	12405835	12405887	12408808	12408979	9286	2,2,1	8,4,3	0,0,3	0,4,7	175	149	8.41671e-05	0.000961762	0.176,0.299,0.221	NA,0.0,0.267	0.098
9375	26939	Polr3e	NC_000073.7	+	120538304	120538519	120538361	120538519	120536825	120536907	9375	0,2,1	0,0,0	0,0,0	0,0,1	206	149	8.30974e-05	0.000961762	NA,1.0,1.0	NA,NA,0.0	1
9599	71330	Rcbtb1	NC_000080.7	+	59447373	59447543	59447376	59447543	59443073	59443171	9599	0,0,0	1,0,0	1,0,1	0,0,0	152	149	8.52755e-05	0.000961762	0.0,NA,NA	1.0,NA,1.0	-1
9920	20408	Sh3gl3	NC_000073.7	+	81919980	81920124	81919987	81920124	81917487	81917560	9920	1,0,0	0,0,0	0,0,0	1,0,0	156	149	8.52393e-05	0.000961762	1.0,NA,NA	0.0,NA,NA	1
3527	230484	Usp1	NC_000070.7	+	98814672	98814911	98814691	98814911	98812046	98812480	3527	24,19,21	6,4,5	10,7,3	6,8,9	168	149	8.54613e-05	0.000961936	0.78,0.808,0.788	0.596,0.437,0.228	0.372
3578	72055	Slc38a10	NC_000077.7	-	119997259	119997436	119997259	119997433	120000257	120000362	3578	62,33,35	5,0,0	22,20,39	8,17,0	152	149	9.0143e-05	0.00101267	0.924,1.0,1.0	0.729,0.536,1.0	0.22
1278	79264	Krit1	NC_000071.7	+	3856418	3856568	3856464	3856568	3853164	3853483	1278	38,35,51	24,56,48	32,36,41	29,18,32	195	149	9.20011e-05	0.00103155	0.547,0.323,0.448	0.457,0.604,0.495	-0.079
5014	59056	Evc	NC_000071.7	-	37456514	37457844	37456514	37457805	37458155	37458267	5014	5,4,3	0,7,7	5,8,5	3,1,2	188	149	0.000101607	0.00113706	1.0,0.312,0.254	0.569,0.864,0.665	-0.177
9165	13429	Dnm1	NC_000068.8	-	32198489	32199649	32198489	32199646	32202138	32202354	9165	2,0,9	0,3,0	5,4,8	4,5,9	152	149	0.000104624	0.00116857	1.0,0.0,1.0	0.551,0.44,0.466	0.181
371	71916	Dus4l	NC_000078.7	-	31691500	31691984	31691500	31691727	31692762	31692885	371	4,5,2	9,10,15	0,0,4	11,17,18	406	149	0.000111119	0.00123874	0.14,0.155,0.047	0.0,0.0,0.075	0.089
9978	12962	Crybb3	NC_000071.7	-	113228345	113228530	113228345	113228516	113229421	113229450	9978	2,0,0	1,4,4	0,1,0	0,0,0	163	149	0.000116196	0.00129285	0.646,0.0,0.0	NA,1.0,NA	-0.785
7741	319885	Zcchc7	NC_000070.7	+	44916179	44916312	44916183	44916312	44908450	44908486	7741	0,4,3	4,0,0	0,0,1	0,2,1	153	149	0.000117696	0.00130704	0.0,1.0,1.0	NA,0.0,0.493	0.42
9826	12905	Cradd	NC_000076.7	-	95158447	95158751	95158447	95158747	95159330	95159610	9826	5,13,3	0,0,3	1,3,7	7,0,3	153	149	0.000117928	0.00130711	1.0,1.0,0.493	0.122,1.0,0.694	0.226
10487	14270	Srgap2	NC_000067.7	-	131224057	131224937	131224057	131224204	131226069	131226250	10487	42,18,31	65,54,50	30,35,30	35,21,34	882	149	0.000124741	0.00137999	0.098,0.053,0.095	0.126,0.22,0.13	-0.077
5160	13356	Dgcr2	NC_000082.7	-	17676223	17676443	17676223	17676434	17677267	17677390	5160	47,29,30	53,13,28	16,24,20	22,28,25	158	149	0.000131178	0.00144845	0.455,0.678,0.503	0.407,0.447,0.43	0.117
962	12488	Cd2ap	NC_000083.7	-	43136727	43136822	43136727	43136786	43137171	43137250	962	62,52,46	0,14,15	52,18,30	2,4,3	185	149	0.000136216	0.00150122	1.0,0.749,0.712	0.954,0.784,0.89	-0.056
6192	75729	Fam227a	NC_000081.7	-	79533837	79534064	79533837	79534061	79542881	79543125	6192	0,0,0	2,1,0	1,2,2	0,1,0	152	149	0.000138684	0.00152552	0.0,0.0,NA	1.0,0.662,1.0	-0.887
376	270198	Pfkfb4	NC_000075.7	+	108839409	108839724	108839516	108839724	108837416	108837538	376	2,1,0	2,0,0	1,1,0	2,4,1	256	149	0.000180935	0.00198652	0.368,1.0,NA	0.225,0.127,0.0	0.567
9056	23969	Pacsin1	NC_000083.7	+	27920740	27920915	27920799	27920915	27874564	27874733	9056	0,0,4	1,0,2	8,0,0	2,0,0	208	149	0.000181472	0.00198866	0.0,NA,0.589	0.741,NA,NA	-0.447
8564	75826	Senp2	NC_000082.7	+	21852120	21855396	21855219	21855396	21850853	21850914	8564	123134156	14,30,30	120,99,141	49,27,35	3248	149	0.000185793	0.00203217	0.287,0.17,0.193	0.101,0.144,0.156	0.083
479	68283	9530077C05Rik	NC_000075.7	+	22335408	22336103	22335807	22336103	22322740	22323045	479	4,1,0	0,2,0	0,7,1	0,0,0	548	149	0.000195831	0.00213795	1.0,0.12,NA	NA,1.0,1.0	-0.44
2911	268445	Ankrd13b	NC_000077.7	-	77361310	77363025	77361310	77362649	77363127	77363204	2911	18,19,16	5,7,16	25,16,11	5,1,1	525	149	0.000209899	0.00228723	0.505,0.435,0.221	0.587,0.82,0.757	-0.334
3311	54394	Crlf3	NC_000077.7	-	79939417	79946034	79939417	79939530	79947277	79947410	3311	296314219	17,9,11	265155207	14,14,14	6653	149	0.000210983	0.00229473	0.281,0.439,0.308	0.298,0.199,0.249	0.094
10287	58207	Slc43a3	NC_000068.8	+	84767290	84768213	84767830	84768213	84766994	84767193	10287	72120135	12,12,11	118112118	4,3,9	689	149	0.000225847	0.00244724	0.565,0.684,0.726	0.864,0.89,0.739	-0.173
2912	268445	Ankrd13b	NC_000077.7	-	77361310	77363005	77361310	77362649	77363127	77363204	2912	16,18,16	5,7,16	24,16,11	5,1,1	505	149	0.000225786	0.00244724	0.486,0.431,0.228	0.586,0.825,0.764	-0.343
6479	15184	Hdac5	NC_000077.7	-	102109241	102109607	102109241	102109313	102115559	102115781	6479	76,115,86	55,33,34	116,90,99	28,31,36	443	149	0.0002347	0.00253843	0.317,0.54,0.46	0.582,0.494,0.481	-0.08
380	71177	Ints13	NC_000072.7	-	146456425	146456596	146456425	146456550	146457628	146457807	380	30,34,30	4,9,9	26,48,42	5,2,4	195	149	0.000235605	0.00254348	0.851,0.743,0.718	0.799,0.948,0.889	-0.108
9098	230751	Oscp1	NC_000070.7	+	125977204	125977517	125977388	125977517	125976674	125976778	9098	6,0,1	6,6,3	0,1,0	5,0,6	333	149	0.000237587	0.00256012	0.309,0.0,0.13	0.0,1.0,0.0	-0.187
541	67894	Dennd10	NC_000085.7	+	60803029	60803246	60803049	60803246	60799992	60800111	541	11,12,10	17,27,13	8,5,5	21,10,17	169	149	0.000243655	0.00262064	0.363,0.282,0.404	0.251,0.306,0.206	0.095
8224	118453	Mmp28	NC_000077.7	-	83334584	83334752	83334584	83334680	83335036	83335186	8224	9,8,10	2,1,2	2,0,1	0,1,1	221	149	0.000248659	0.00266953	0.752,0.844,0.771	1.0,0.0,0.403	0.321
2399	230752	Eva1b	NC_000070.7	+	126042676	126043668	126042743	126043668	126041124	126042424	2399	17,11,22	14,30,32	9,8,3	40,20,34	216	149	0.000265577	0.00284589	0.456,0.202,0.322	0.134,0.216,0.057	0.191
627	243272	Sbno1	NC_000071.7	-	124548132	124548445	124548132	124548442	124551247	124551352	627	48,47,61	7,30,9	58,48,59	15,36,21	152	149	0.000275943	0.00295152	0.87,0.606,0.869	0.791,0.567,0.734	0.084
2345	100037278	Niban3	NC_000074.7	+	72060152	72061599	72060184	72061599	72059304	72059388	2345	0,0,1	1,1,0	1,1,1	0,0,0	181	149	0.000283075	0.00302224	0.0,0.0,1.0	1.0,1.0,1.0	-0.667
4221	214424	Parp16	NC_000075.7	+	65143118	65144064	65143922	65144064	65140950	65141122	4221	14,10,7	3,4,3	7,6,3	3,4,4	953	149	0.000284633	0.0030333	0.422,0.281,0.267	0.267,0.19,0.105	0.136
7608	544971	Bdp1	NC_000079.7	-	100215166	100215307	100215166	100215260	100225860	100225955	7608	1,4,0	0,0,0	0,1,3	0,3,0	196	149	0.00028853	0.0030692	1.0,1.0,NA	NA,0.202,1.0	0.399
6367	93836	Rnf111	NC_000075.7	-	70357567	70357823	70357567	70357820	70360782	70361099	6367	29,25,29	15,11,12	12,18,32	17,22,16	152	149	0.000295861	0.00314143	0.655,0.69,0.703	0.409,0.445,0.662	0.177
10611	105244024	Gm39712	NC_000067.7	-	180230850	180231190	180230850	180231013	180231416	180231526	10611	0,1,0	2,0,0	1,2,1	0,0,1	326	149	0.000308641	0.00327114	0.0,1.0,NA	1.0,1.0,0.314	-0.271
3028	83701	Srrt	NC_000071.7	-	137299579	137300196	137299579	137299909	137300387	137300576	3028	36,61,52	1,3,3	29,34,21	7,1,2	436	149	0.000312061	0.00330136	0.925,0.874,0.856	0.586,0.921,0.782	0.122
9420	66812	Ppcdc	NC_000075.7	-	57292377	57292712	57292377	57292660	57306043	57306128	9420	0,1,0	3,0,0	0,1,0	0,3,0	201	149	0.000317351	0.00335122	0.0,1.0,NA	NA,0.198,NA	0.302
3371	217733	Tmem63c	NC_000078.7	+	87101230	87103371	87103161	87103371	87099599	87099662	3371	2,2,1	0,1,1	0,0,2	0,0,0	2080	149	0.000329165	0.00346339	1.0,0.125,0.067	NA,NA,1.0	-0.603
6345	100756	Usp30	NC_000071.7	+	114249929	114249975	114249932	114249975	114249177	114249276	6345	9,16,9	1,1,6	11,6,6	11,5,6	152	149	0.000329037	0.00346339	0.898,0.94,0.595	0.495,0.541,0.495	0.301
818	93671	Cd163	NC_000072.7	+	124305920	124306056	124306003	124306056	124304856	124304946	818	2,0,1	8,6,10	6,3,2	4,4,9	232	149	0.000332356	0.00349063	0.138,0.0,0.06	0.491,0.325,0.125	-0.248
7860	77065	Ints7	NC_000067.7	+	191341768	191342613	191342475	191342613	191339931	191340171	7860	85,39,41	20,1,3	37,31,47	5,0,4	856	149	0.000346838	0.00363616	0.425,0.872,0.704	0.563,1.0,0.672	-0.078
9388	17921	Myo7a	NC_000073.7	-	97714818	97715102	97714818	97714988	97715547	97715674	9388	8,3,1	8,2,4	1,2,1	8,5,14	263	149	0.000348382	0.00364577	0.362,0.459,0.124	0.066,0.185,0.039	0.218
7714	13592	Ebf2	NC_000080.7	+	67472274	67472714	67472279	67472714	67470740	67471405	7714	3,2,1	0,0,0	0,2,2	3,2,1	154	149	0.000350414	0.00366044	1.0,1.0,1.0	0.0,0.492,0.659	0.616
9406	110962	Mbd6	NC_000076.7	-	127119394	127119811	127119394	127119808	127119911	127120084	9406	16,15,32	6,30,35	15,4,18	34,18,35	152	149	0.000351942	0.0036698	0.723,0.329,0.473	0.302,0.179,0.335	0.236
8890	13560	E4f1	NC_000083.7	-	24664095	24664313	24664095	24664287	24664419	24664525	8890	14,22,11	3,1,5	13,16,26	0,0,5	175	149	0.000364554	0.0037945	0.799,0.949,0.652	1.0,1.0,0.816	-0.139
6519	72056	1810055G02Rik	NC_000085.7	+	3764046	3764625	3764406	3764625	3758292	3758436	6519	18,6,11	5,1,0	17,8,15	1,5,6	509	149	0.000392584	0.00407894	0.513,0.637,1.0	0.833,0.319,0.423	0.192
747	76763	Mospd2	NC_000086.8	-	163719164	163721688	163719164	163720080	163722638	163722741	747	265150223	3,1,0	189159210	5,2,1	1757	149	0.000412199	0.00427509	0.882,0.927,1.0	0.762,0.871,0.947	0.076
10320	209692	Dhtkd1	NC_000068.8	-	5927783	5927834	5927783	5927831	5928679	5928949	10320	0,0,5	8,5,5	1,1,2	3,5,2	152	149	0.000424512	0.00439495	0.0,0.0,0.495	0.246,0.164,0.495	-0.137
10431	68394	Ccdc163	NC_000070.7	+	116571212	116571346	116571284	116571346	116569919	116570023	10431	0,0,0	0,3,6	0,4,2	1,1,2	221	149	0.000425739	0.00439981	NA,0.0,0.0	0.0,0.729,0.403	-0.377
6760	237500	Tmtc3	NC_000076.7	-	100320912	100321047	100320912	100320987	100323023	100323230	6760	4,0,0	7,0,6	1,2,10	14,8,7	209	149	0.000447099	0.00461234	0.289,NA,0.0	0.048,0.151,0.505	-0.09
2273	54188	Cpsf4	NC_000071.7	+	145115642	145115738	145115645	145115738	145114039	145114112	2273	0,8,11	5,4,5	13,10,11	1,8,5	152	149	0.000464054	0.00477877	0.0,0.662,0.683	0.927,0.551,0.683	-0.272
10003	67225	Rnpc3	NC_000069.7	-	113398715	113400948	113398715	113399296	113401988	113402060	10003	466329372	1,10,9	293233303	16,12,9	1801	149	0.000467243	0.00480309	0.975,0.731,0.774	0.602,0.616,0.736	0.175
9998	234730	Fcsk	NC_000074.7	-	111616307	111616470	111616307	111616372	111616807	111616978	9998	5,7,1	15,3,5	0,1,0	9,5,0	247	149	0.000472636	0.00484994	0.167,0.585,0.108	0.0,0.108,NA	0.233
4608	260302	Gga3	NC_000077.7	-	115482455	115482579	115482455	115482520	115483257	115483356	4608	39,42,44	2,2,2	44,34,48	7,5,2	208	149	0.000474864	0.00486421	0.933,0.938,0.94	0.818,0.83,0.945	0.073
1469	72881	Zdhhc4	NC_000071.7	-	143309886	143310153	143309886	143310065	143310639	143310713	1469	7,11,16	13,26,16	7,6,16	23,20,33	237	149	0.000480014	0.00490831	0.253,0.21,0.386	0.161,0.159,0.234	0.098
6269	234366	Gatad2a	NC_000074.7	-	70365572	70365874	70365572	70365871	70367168	70367448	6269	57,41,55	11,7,2	49,50,67	4,4,0	152	149	0.000481089	0.00491066	0.836,0.852,0.964	0.923,0.925,1.0	-0.065
2002	207592	Tbc1d16	NC_000077.7	-	119066172	119066220	119066172	119066217	119099596	119100194	2002	5,7,8	8,7,8	1,0,3	8,6,9	152	149	0.000503931	0.0051258	0.38,0.495,0.495	0.109,0.0,0.246	0.338
5989	243612	Ssu2	NC_000072.7	-	112359276	112359409	112359276	112359406	112360846	112360928	5989	1,2,2	0,1,2	0,2,0	7,0,1	152	149	0.000503623	0.0051258	1.0,0.662,0.495	0.0,1.0,0.0	0.386
9403	545428	Ccdc141	NC_000068.8	-	76875003	76875730	76875003	76875129	76875949	76876129	9403	172196191	121171153	172,108,91	204166211	750	149	0.000505629	0.00513408	0.22,0.185,0.199	0.143,0.114,0.079	0.089
2694	94045	P2rx5	NC_000077.7	+	73062370	73063509	73062515	73063509	73061908	73062076	2694	13,7,8	4,5,3	3,3,2	1,5,4	294	149	0.000518746	0.00525808	0.622,0.415,0.575	0.603,0.233,0.202	0.191
3331	207921	Fam228b	NC_000078.7	-	4789887	4791207	4789887	4790043	4794469	4794606	3331	41,35,25	2,0,0	30,35,20	3,0,1	1313	149	0.000529181	0.0053545	0.699,1.0,1.0	0.532,1.0,0.694	0.158
271	17925	Myo9b	NC_000074.7	+	71786956	71787038	71786959	71787038	71786270	71786475	271	14,15,33	6,14,6	29,29,31	8,6,9	152	149	0.00053167	0.00537032	0.696,0.512,0.844	0.78,0.826,0.772	-0.109
2714	102633863	Gm31588	NC_000075.7	-	92104098	92104300	92104098	92104213	92109216	92114186	2714	13,14,27	4,11,15	11,13,13	0,5,6	236	149	0.000540995	0.00545503	0.672,0.446,0.532	1.0,0.621,0.578	-0.183
10520	23939	Mapk7	NC_000077.7	-	61383729	61384011	61383729	61383895	61384331	61384780	10520	2,3,5	0,0,0	0,2,3	3,2,0	265	149	0.000547504	0.0055111	1.0,1.0,1.0	0.0,0.36,1.0	0.547
3966	246179	Fktn	NC_000070.7	+	53742462	53742766	53742495	53742766	53737526	53737659	3966	0,0,4	0,1,4	7,2,5	0,5,0	182	149	0.000577697	0.00580496	NA,0.0,0.45	1.0,0.247,1.0	-0.524
3598	52808	Tspyl2	NC_000086.8	-	151121720	151122391	151121720	151122388	151122628	151122723	3598	1,3,5	4,24,21	9,5,3	27,12,15	152	149	0.00058402	0.00585835	0.197,0.109,0.189	0.246,0.29,0.164	-0.068
3798	230603	Ttc39a	NC_000070.7	+	109299772	109300008	109299893	109300008	109299423	109299535	3798	0,5,4	5,0,1	0,0,0	3,1,3	270	149	0.000628739	0.00629607	0.0,1.0,0.688	0.0,0.0,0.0	0.563
1831	13841	Epha7	NC_000070.7	+	28946218	28947653	28947539	28947653	28943322	28943378	1831	11,14,19	0,0,1	7,6,14	1,1,1	1470	149	0.000649765	0.00649541	1.0,1.0,0.658	0.415,0.378,0.587	0.426
4891	22129	Ttc3	NC_000082.7	+	94209412	94209760	94209605	94209760	94204172	94204227	4891	52,78,75	8,6,4	38,35,41	0,0,1	342	149	0.000652571	0.00651225	0.739,0.85,0.891	1.0,1.0,0.947	-0.156
1565	14265	Fmr1	NC_000086.8	+	67755101	67756019	67755911	67756019	67754189	67754385	1565	107,67,60	8,6,0	46,49,60	3,0,0	959	149	0.000661917	0.0065942	0.675,0.634,1.0	0.704,1.0,1.0	-0.132
270	17925	Myo9b	NC_000074.7	+	71812201	71813357	71812307	71813357	71811968	71812096	270	10,28,22	14,6,7	30,19,30	3,6,1	255	149	0.000714955	0.00711037	0.294,0.732,0.647	0.854,0.649,0.946	-0.259
4203	75906	Fam184a	NC_000076.7	-	53511327	53511993	53511327	53511530	53514272	53514377	4203	0,2,0	0,2,0	6,2,4	0,0,0	612	149	0.000729088	0.00723853	NA,0.196,NA	1.0,1.0,1.0	-0.804
6632	72017	Cyb5r1	NC_000067.7	+	134335554	134336225	134336141	134336225	134335311	134335441	6632	61,49,51	67,39,36	39,20,27	39,38,47	736	149	0.000739587	0.00733024	0.156,0.203,0.223	0.168,0.096,0.104	0.071
2576	100683	Trrap	NC_000071.7	+	144728080	144728178	144728083	144728178	144727630	144727997	2576	21,49,31	12,10,15	32,20,28	16,13,15	152	149	0.000774567	0.00764155	0.632,0.828,0.67	0.662,0.601,0.647	0.073
3029	83701	Srrt	NC_000071.7	-	137298505	137300196	137298505	137298675	137300387	137300576	3029	235210187	22,44,47	126120129	30,51,39	1670	149	0.00077454	0.00764155	0.488,0.299,0.262	0.273,0.174,0.228	0.125
9362	268747	Carmil3	NC_000080.7	+	55745373	55745729	55745376	55745729	55745141	55745261	9362	9,8,6	0,4,4	0,2,6	0,2,6	152	149	0.000774944	0.00764155	1.0,0.662,0.595	NA,0.495,0.495	0.257
9982	12962	Crybb3	NC_000071.7	-	113228345	113228516	113228345	113228446	113229421	113229450	9982	1,5,4	0,0,3	0,1,0	1,1,0	219	149	0.000795026	0.00782629	1.0,1.0,0.476	0.0,0.405,NA	0.623
413	70762	Dclk2	NC_000069.7	-	86723664	86723740	86723664	86723737	86731942	86732037	413	3,1,0	6,5,0	1,0,0	0,1,0	152	149	0.000809272	0.00795305	0.329,0.164,NA	1.0,0.0,NA	-0.254
10638	21857	Timp1	NC_000086.8	+	20737269	20737401	20737272	20737401	20736404	20736563	10638	0,0,3	0,0,1	0,3,0	4,1,2	152	149	0.000811279	0.00795931	NA,NA,0.746	0.0,0.746,0.0	0.497
1918	71834	Zbtb43	NC_000068.8	-	33354925	33355049	33354925	33354986	33358444	33358544	1918	1,11,0	7,0,13	13,23,14	9,11,7	212	149	0.000854916	0.00837328	0.091,1.0,0.0	0.504,0.595,0.584	-0.197
1024	13542	Dvl1	NC_000070.7	+	155940546	155940720	155940588	155940720	155939728	155939796	1024	5,2,2	31,15,11	2,4,2	7,8,5	191	149	0.000869504	0.00850182	0.112,0.094,0.124	0.182,0.281,0.238	-0.124
2857	20534	Slc4a1ap	NC_000071.7	+	31705954	31706025	31705957	31706025	31701013	31701257	2857	2,10,6	0,0,0	5,13,5	4,1,5	152	149	0.000912254	0.00890483	1.0,1.0,1.0	0.551,0.927,0.495	0.342
8211	230676	Szt2	NC_000070.7	-	118245740	118245911	118245740	118245841	118246119	118246233	8211	30,13,18	8,9,7	10,10,18	0,1,3	219	149	0.000939395	0.00915437	0.718,0.496,0.636	1.0,0.872,0.803	-0.275
412	70762	Dclk2	NC_000069.7	-	86699301	86700606	86699301	86699418	86701123	86701220	412	32,12,15	0,6,0	7,3,16	0,0,0	1337	149	0.000985365	0.00958626	1.0,0.182,1.0	1.0,1.0,1.0	-0.273
4377	21887	Tle3	NC_000075.7	+	61309134	61309339	61309137	61309339	61301889	61301964	4377	13,16,9	2,0,0	15,24,22	5,1,2	152	149	0.000995706	0.00967067	0.864,1.0,1.0	0.746,0.959,0.915	0.081
2555	268739	Arhgef40	NC_000080.7	+	52242335	52242492	52242445	52242492	52242068	52242199	2555	4,8,10	36,30,26	8,7,8	24,13,14	259	149	0.00101166	0.00980924	0.06,0.133,0.181	0.161,0.237,0.247	-0.09
4186	58988	Rps6kb2	NC_000085.7	-	4208064	4208365	4208064	4208127	4208608	4208716	4186	4,8,8	16,38,29	12,19,14	23,24,24	387	149	0.00101835	0.00985763	0.088,0.075,0.096	0.167,0.234,0.183	-0.108
1785	68028	Rpl22l1	NC_000069.7	+	28860648	28860741	28860651	28860741	28859656	28859692	1785	0,0,0	0,15,18	0,0,11	17,21,9	152	149	0.00104795	0.0101273	NA,0.0,0.0	0.0,0.0,0.545	-0.182
6366	93836	Rnf111	NC_000075.7	-	70336833	70336961	70336833	70336937	70338212	70338308	6366	14,6,12	45,30,30	18,11,18	36,44,21	173	149	0.00105381	0.010167	0.211,0.147,0.256	0.301,0.177,0.425	-0.096
4094	22003	Tpm1	NC_000075.7	-	66929871	66931847	66929871	66930723	66938310	66938380	4094	128,122,98	123,67,75	32,55,54	64,62,74	1273	149	0.0010832	0.0104332	0.109,0.176,0.133	0.055,0.094,0.079	0.063
8832	231326	Aasdh	NC_000071.7	-	77025373	77025835	77025373	77025505	77026250	77026373	8832	63,13,28	5,11,13	15,16,33	12,4,13	479	149	0.00108662	0.0104489	0.797,0.269,0.401	0.28,0.554,0.441	0.064
9232	19362	Rad51ap1	NC_000072.7	-	126901880	126902082	126901880	126902030	126903321	126903480	9232	0,0,0	2,0,3	4,0,0	2,0,0	201	149	0.00109584	0.0105201	0.0,NA,0.0	0.597,NA,NA	-0.597
2389	69784	1500009L16Rik	NC_000076.7	+	83595456	83595494	83595461	83595494	83593997	83594077	2389	13,13,12	2,6,4	6,10,6	0,0,0	154	149	0.00109903	0.0105333	0.863,0.677,0.744	1.0,1.0,1.0	-0.239
4409	56790	Supt20	NC_000069.7	+	54629941	54630061	54629977	54630061	54627826	54627882	4409	20,17,32	8,4,8	13,14,14	2,2,0	185	149	0.00110895	0.0106109	0.668,0.774,0.763	0.84,0.849,1.0	-0.161
6049	77634	Snapc3	NC_000070.7	+	83360989	83368472	83368434	83368472	83360123	83360206	6049	203165142	3,2,7	139120168	3,0,0	7594	149	0.00114643	0.0109514	0.57,0.618,0.285	0.476,1.0,1.0	-0.334
7425	17777	Mttp	NC_000069.7	-	137839760	137839899	137839760	137839896	137844662	137844757	7425	2,0,2	0,6,1	3,0,0	0,0,5	152	149	0.0011538	0.0110037	1.0,0.0,0.662	1.0,NA,0.0	0.054
5867	279653	Pcdh19	NC_000086.8	-	132526017	132526190	132526017	132526187	132533643	132533702	5867	12,14,15	5,17,22	5,6,5	25,8,30	152	149	0.00116268	0.0110702	0.702,0.447,0.401	0.164,0.424,0.14	0.274
5925	234915	Cep126	NC_000075.7	-	8076460	8078035	8076460	8076947	8079495	8079560	5925	15,18,20	0,4,3	34,11,25	9,1,5	1237	149	0.00118347	0.0112497	1.0,0.352,0.445	0.313,0.57,0.376	0.179
4710	57773	Wdr4	NC_000083.7	-	31722483	31722701	31722483	31722640	31728742	31728886	4710	2,4,2	10,10,2	0,2,0	11,4,7	210	149	0.00122619	0.0116367	0.124,0.221,0.415	0.0,0.262,0.0	0.166
1926	108086	Rnf216	NC_000071.7	-	143075874	143076684	143075874	143076513	143078749	143078880	1926	26,64,47	34,46,46	28,15,34	63,39,59	320	149	0.00123374	0.0116893	0.263,0.393,0.322	0.171,0.152,0.212	0.148
6679	71041	Pcgf6	NC_000085.7	-	47028482	47030578	47028482	47028581	47031204	47031232	6679	68,24,47	9,2,4	21,19,22	2,3,6	2146	149	0.00126582	0.0119737	0.344,0.454,0.449	0.422,0.305,0.203	0.106
4239	19014	Med1	NC_000077.7	-	98042979	98045732	98042979	98043951	98049154	98049295	4239	663693648	7,2,20	606565770	2,3,5	1930	149	0.00132244	0.012489	0.88,0.964,0.714	0.959,0.936,0.922	-0.086
9490	17537	Meis3	NC_000073.7	+	15912875	15913025	15912926	15913025	15912669	15912720	9490	3,3,1	4,1,0	2,1,0	0,2,0	200	149	0.001328	0.0125212	0.358,0.691,1.0	1.0,0.271,NA	0.047
1550	20684	Sp100	NC_000067.7	+	85601345	85601492	85601402	85601492	85597722	85597803	1550	30,31,42	11,0,4	54,45,39	2,4,3	206	149	0.001332	0.0125385	0.664,1.0,0.884	0.951,0.891,0.904	-0.066
4005	72308	Brf1	NC_000078.7	-	112929348	112929638	112929348	112929612	112932884	112932977	4005	26,13,10	81,60,65	8,8,11	68,61,77	175	149	0.00133527	0.0125489	0.215,0.156,0.116	0.091,0.1,0.108	0.063
6717	338354	Zfp780b	NC_000073.7	-	27676176	27676401	27676176	27676258	27678514	27678758	6717	6,7,2	9,10,11	0,2,3	4,9,7	292	149	0.00135118	0.012678	0.254,0.263,0.085	0.0,0.102,0.179	0.107
1256	102633513	Gm31323	NC_000082.7	+	94289313	94291088	94289456	94291088	94289054	94289181	1256	2,1,1	0,2,0	0,1,0	0,0,0	292	149	0.00135904	0.0127312	1.0,0.203,1.0	NA,1.0,NA	-0.266
8679	238130	Dock4	NC_000078.7	+	40885768	40886701	40886628	40886701	40884619	40884729	8679	21,30,24	13,15,26	10,3,9	18,10,17	1009	149	0.00138035	0.0129099	0.193,0.228,0.12	0.076,0.042,0.073	0.117
2494	78783	Brpf1	NC_000072.7	+	113295998	113296322	113296001	113296322	113295372	113295682	2494	0,8,7	25,32,29	1,10,10	31,20,18	152	149	0.0014031	0.0131016	0.0,0.197,0.191	0.031,0.329,0.353	-0.108
2435	380928	Lmo7	NC_000080.7	+	102123566	102123767	102123569	102123767	102122726	102123008	2435	33,22,46	15,11,12	62,47,53	14,9,16	152	149	0.00140692	0.0131162	0.683,0.662,0.79	0.813,0.837,0.765	-0.093
2552	210004	B3gntl1	NC_000077.7	-	121507022	121508681	121507022	121508678	121510460	121510554	2552	0,1,1	0,8,3	0,2,0	6,7,6	152	149	0.00141057	0.0131292	NA,0.109,0.246	0.0,0.219,0.0	0.104
4595	17342	Mitf	NC_000072.7	+	97983083	97983158	97983101	97983158	97980847	97980965	4595	31,52,51	43,57,44	60,68,42	38,39,46	167	149	0.00143483	0.0133336	0.391,0.449,0.508	0.585,0.609,0.449	-0.098
6792	23917	Impdh1	NC_000072.7	-	29212067	29212169	29212067	29212166	29216070	29216363	6792	13,2,0	5,8,8	3,4,3	7,0,2	152	149	0.00144542	0.0134105	0.718,0.197,0.0	0.296,1.0,0.595	-0.325
5411	21812	Tgfbr1	NC_000070.7	+	47393246	47393489	47393258	47393489	47383748	47383994	5411	31,28,15	21,19,17	20,13,14	20,12,20	161	149	0.00152284	0.0141063	0.577,0.577,0.45	0.481,0.501,0.393	0.076
2892	21841	Tia1	NC_000072.7	+	86396082	86397393	86397305	86397393	86395859	86395914	2892	251143230	9,8,12	123130159	12,10,26	1372	149	0.00155003	0.0143353	0.752,0.66,0.675	0.527,0.585,0.399	0.192
2910	268445	Ankrd13b	NC_000077.7	-	77361310	77362704	77361310	77362649	77363127	77363204	2910	5,7,16	5,7,16	3,8,8	5,1,1	204	149	0.00155382	0.0143475	0.422,0.422,0.422	0.305,0.854,0.854	-0.249
7290	18806	Pld2	NC_000077.7	+	70441954	70442089	70442005	70442089	70433768	70433921	7290	3,3,0	1,1,0	0,0,1	6,0,0	200	149	0.00162853	0.0150135	0.691,0.691,NA	0.0,NA,1.0	0.191
165	230861	Eif4g3	NC_000070.7	+	137811555	137811681	137811567	137811681	137810224	137810299	165	0,3,3	0,3,4	3,0,0	2,5,1	161	149	0.00163177	0.0150195	NA,0.481,0.41	0.581,0.0,0.0	0.252
9433	100503043	Armcx4	NC_000086.8	+	133589965	133597506	133590170	133597506	133589568	133589653	9433	37,40,20	1,9,2	13,10,8	0,0,0	354	149	0.00164249	0.0150943	0.94,0.652,0.808	1.0,1.0,1.0	-0.2
10539	108829	Jmjd1c	NC_000076.7	+	67053816	67053960	67053895	67053960	67052761	67052886	10539	67,42,35	0,9,14	32,42,34	1,0,5	228	149	0.00165932	0.0152248	1.0,0.753,0.62	0.954,1.0,0.816	-0.132
4265	231464	Cnot6l	NC_000071.7	-	96278917	96279104	96278917	96279100	96281869	96281991	4265	74,57,61	7,6,4	54,40,78	0,1,2	153	149	0.00172699	0.0158207	0.911,0.902,0.937	1.0,0.975,0.974	-0.066
709	11593	Aga	NC_000074.7	+	53974597	53976457	53976210	53976457	53974084	53974218	709	59,60,68	34,39,21	79,62,99	26,34,15	1762	149	0.00173032	0.0158263	0.128,0.115,0.215	0.204,0.134,0.358	-0.079
7067	74343	Crtc2	NC_000069.7	+	90170143	90170287	90170220	90170287	90169757	90170021	7067	1,0,2	0,4,2	1,2,1	2,0,0	226	149	0.00174068	0.015872	1.0,0.0,0.397	0.248,1.0,1.0	-0.284
9835	54525	Syt7	NC_000085.7	+	10399758	10400376	10400148	10400376	10399120	10399252	9835	14,33,9	21,13,8	22,26,8	38,26,24	539	149	0.00174078	0.015872	0.156,0.412,0.237	0.138,0.217,0.084	0.122
1870	72615	Anks3	NC_000082.7	-	4759315	4759846	4759315	4759661	4760074	4760158	1870	5,7,8	4,1,1	7,6,4	14,1,9	334	149	0.00177101	0.0161223	0.358,0.757,0.781	0.182,0.728,0.165	0.274
1033	232811	Kmt5c	NC_000073.7	+	4748707	4748937	4748800	4748937	4746245	4746265	1033	4,4,5	14,6,10	0,1,1	7,10,16	242	149	0.00179508	0.0163158	0.15,0.291,0.235	0.0,0.058,0.037	0.194
4529	78754	Galnt15	NC_000080.7	+	31778178	31778364	31778220	31778364	31774741	31774846	4529	0,7,10	50,54,97	14,7,14	49,27,36	191	149	0.00182232	0.0165376	0.0,0.092,0.074	0.182,0.168,0.233	-0.139
3404	108153	Adamts7	NC_000075.7	+	90062677	90062824	90062753	90062824	90061375	90061525	3404	11,6,14	16,16,26	22,11,14	9,8,16	225	149	0.00186721	0.0169185	0.313,0.199,0.263	0.618,0.477,0.367	-0.229
3473	14226	Fkbp1b	NC_000078.7	-	4883173	4883840	4883173	4883795	4884738	4884883	3473	0,0,3	0,0,1	1,0,0	0,0,1	194	149	0.00187885	0.0169975	NA,NA,0.697	1.0,NA,0.0	0.197
8629	320678	Iffo1	NC_000072.7	+	125130369	125130465	125130372	125130465	125130004	125130125	8629	20,20,18	9,6,5	13,7,17	12,1,10	152	149	0.0020071	0.0181295	0.685,0.766,0.779	0.515,0.873,0.625	0.072
8963	51897	Atg13	NC_000068.8	-	91512370	91512481	91512370	91512454	91513147	91513246	8963	39,37,50	2,5,0	16,48,40	7,6,8	176	149	0.00203247	0.0183301	0.943,0.862,1.0	0.659,0.871,0.809	0.155
8353	102638002	Gm15222	NC_000080.7	+	46625720	46626739	46626499	46626739	46624934	46625594	8353	1,1,4	0,1,0	0,6,0	0,0,0	928	149	0.00215733	0.019426	1.0,0.138,1.0	NA,1.0,NA	-0.287
6619	14814	Grin2d	NC_000073.7	-	45503997	45504156	45503997	45504123	45506163	45506317	6619	0,1,2	1,5,0	0,0,1	2,0,2	182	149	0.00218046	0.0196039	0.0,0.141,1.0	0.0,NA,0.29	0.235
746	76763	Mospd2	NC_000086.8	-	163719335	163720299	163719335	163720080	163722638	163722741	746	42,22,25	3,1,0	28,25,41	5,2,1	368	149	0.00226399	0.0202921	0.85,0.899,1.0	0.694,0.835,0.943	0.092
9788	76375	Det1	NC_000073.7	-	78477218	78477860	78477218	78477412	78483858	78484050	9788	30,58,41	0,0,0	46,39,64	6,1,4	597	149	0.00226308	0.0202921	1.0,1.0,1.0	0.657,0.907,0.8	0.212
1564	14265	Fmr1	NC_000086.8	+	67755101	67756019	67755836	67756019	67754189	67754385	1564	93,51,37	9,15,14	33,30,38	12,10,11	884	149	0.00230037	0.0205864	0.635,0.364,0.308	0.317,0.336,0.368	0.095
4530	13823	Epb41l3	NC_000083.7	+	69569120	69569341	69569174	69569341	69566007	69566183	4530	33,22,19	13,12,18	18,28,23	2,7,4	203	149	0.0023291	0.0208114	0.651,0.574,0.437	0.869,0.746,0.808	-0.254
2347	100037278	Niban3	NC_000074.7	+	72060148	72061599	72060152	72061599	72059304	72059388	2347	2,1,0	0,0,0	0,1,3	1,1,0	153	149	0.00237304	0.0211714	1.0,1.0,NA	0.0,0.493,1.0	0.502
7065	338363	Tmem241	NC_000084.7	-	12113192	12116699	12113192	12116650	12126620	12126685	7065	4,4,3	12,9,7	3,1,0	18,5,5	198	149	0.00237932	0.021195	0.201,0.251,0.244	0.111,0.131,0.0	0.151
10363	320360	Ric3	NC_000073.7	-	108647157	108647303	108647157	108647300	108653571	108653665	10363	0,4,4	6,1,0	7,2,5	0,1,0	152	149	0.00240012	0.0213475	0.0,0.797,1.0	1.0,0.662,1.0	-0.288
6047	77634	Snapc3	NC_000070.7	+	83368307	83368472	83368434	83368472	83360123	83360206	6047	33,26,17	3,2,7	14,25,25	3,0,0	276	149	0.00240654	0.0213719	0.856,0.875,0.567	0.716,1.0,1.0	-0.139
5138	26422	Nbea	NC_000069.7	-	55554776	55554969	55554776	55554954	55557098	55557188	5138	15,4,17	7,4,7	13,8,12	3,2,1	164	149	0.00248144	0.0220033	0.661,0.476,0.688	0.797,0.784,0.916	-0.224
2234	23831	Car14	NC_000069.7	-	95805079	95805564	95805079	95805524	95806112	95806197	2234	13,17,4	244248195	16,32,17	146128214	189	149	0.00254814	0.0225603	0.04,0.051,0.016	0.08,0.165,0.059	-0.066
530	51885	Tubgcp4	NC_000068.8	+	121020304	121020446	121020307	121020446	121019842	121019950	530	22,17,15	46,14,9	10,15,13	10,4,9	152	149	0.00262401	0.0231967	0.319,0.543,0.62	0.495,0.786,0.586	-0.128
8734	14924	Magi1	NC_000072.7	-	93670988	93671189	93670988	93671156	93674174	93674468	8734	4,1,4	10,9,11	0,0,2	15,5,5	182	149	0.00267257	0.0235901	0.247,0.083,0.229	0.0,0.0,0.247	0.104
2891	21841	Tia1	NC_000072.7	+	86396675	86397393	86397305	86397393	86395859	86395914	2891	101,74,119	9,8,12	57,64,65	12,10,26	779	149	0.00268668	0.0236428	0.682,0.639,0.655	0.476,0.55,0.323	0.209
4117	94040	Clmn	NC_000078.7	-	104740747	104742187	104740747	104740808	104743203	104743400	4117	1,7,16	0,0,0	15,8,4	0,2,2	1528	149	0.00268275	0.0236428	1.0,1.0,1.0	1.0,0.281,0.163	0.519
1354	73447	Wdr13	NC_000086.8	-	7997623	7998116	7997623	7997830	7998525	7999097	1354	50,53,49	0,0,0	60,51,44	4,4,5	435	149	0.00271304	0.0238386	1.0,1.0,1.0	0.837,0.814,0.751	0.199
9964	66174	Nudt14	NC_000078.7	-	112901975	112902213	112901975	112902177	112902414	112902479	9964	38,14,20	3,6,3	15,9,29	3,5,7	185	149	0.00275018	0.0241285	0.911,0.653,0.843	0.801,0.592,0.769	0.082
7799	14276	Folr2	NC_000073.7	-	101492874	101493031	101492874	101493027	101494410	101494538	7799	10,28,13	0,0,0	33,40,43	8,4,8	153	149	0.00277349	0.0242963	1.0,1.0,1.0	0.801,0.907,0.84	0.151
1301	208266	Dot1l	NC_000076.7	+	80614096	80614176	80614133	80614176	80613389	80613445	1301	17,22,14	2,9,2	46,35,65	4,5,1	186	149	0.00281621	0.0246333	0.872,0.662,0.849	0.902,0.849,0.981	-0.116
3580	72055	Slc38a10	NC_000077.7	-	119997259	119997436	119997259	119997433	119999292	119999379	3580	139,116,75	20,11,17	86,66,93	6,0,12	152	149	0.00286652	0.0250357	0.872,0.912,0.812	0.934,1.0,0.884	-0.074
2924	67586	Ubxn11	NC_000070.7	+	133839781	133839920	133839825	133839920	133836870	133836969	2924	0,5,0	0,6,0	2,0,0	2,1,0	193	149	0.00293199	0.0255691	NA,0.391,NA	0.436,0.0,NA	0.173
8329	216874	Camta2	NC_000077.7	-	70574104	70574191	70574104	70574176	70574715	70574851	8329	5,8,4	21,64,40	0,3,4	40,43,40	164	149	0.00294812	0.0256712	0.178,0.102,0.083	0.0,0.06,0.083	0.073
5032	67883	Uxs1	NC_000067.7	-	43844785	43844849	43844785	43844834	43846509	43846537	5032	1,8,2	15,30,19	9,9,11	25,17,21	164	149	0.00300388	0.0261092	0.057,0.195,0.087	0.246,0.325,0.322	-0.185
6184	231051	Kmt2c	NC_000071.7	-	25498104	25498243	25498104	25498174	25503867	25505574	6184	3,2,2	0,0,0	2,0,0	1,0,2	218	149	0.00300741	0.0261092	1.0,1.0,1.0	0.578,NA,0.0	0.711
3816	442804	Kirrel3os	NC_000075.7	-	34889330	34894164	34889330	34890278	34894916	34895037	3816	19,6,8	0,2,0	0,8,5	0,0,0	4035	149	0.00303571	0.0263155	1.0,0.1,1.0	NA,1.0,1.0	-0.3
2834	19009	Pou6f1	NC_000081.7	-	100484524	100484750	100484524	100484653	100485669	100485786	2834	4,3,12	9,6,8	0,3,1	6,11,6	246	149	0.00304246	0.0263348	0.212,0.232,0.476	0.0,0.142,0.092	0.229
3575	259277	Klk8	NC_000073.7	+	43447983	43448207	43448047	43448207	43447478	43447556	3575	0,4,0	9,7,0	0,5,2	6,5,14	213	149	0.00307681	0.0265924	0.0,0.286,NA	0.0,0.412,0.091	-0.025
6194	73569	Vgll3	NC_000082.7	+	65624776	65625062	65624779	65625062	65612074	65612644	6194	2,8,3	0,5,0	1,0,0	0,0,2	152	149	0.00313558	0.0270601	1.0,0.611,1.0	1.0,NA,0.0	0.37
8733	14924	Magi1	NC_000072.7	-	93670988	93671192	93670988	93671189	93674174	93674468	8733	2,3,1	3,0,0	1,0,0	0,0,0	152	149	0.00323614	0.0278865	0.395,1.0,1.0	1.0,NA,NA	-0.202
9881	16188	Il3ra	NC_000080.7	-	8119495	8119915	8119495	8119728	8120390	8120520	9881	3,1,8	8,3,2	2,0,1	19,5,7	336	149	0.0032812	0.0282329	0.143,0.129,0.639	0.045,0.0,0.06	0.269
8833	231326	Aasdh	NC_000071.7	-	77025373	77026059	77025373	77025505	77026250	77026373	8833	80,26,38	5,11,13	19,26,50	12,4,13	703	149	0.0034329	0.0294945	0.772,0.334,0.383	0.251,0.579,0.449	0.07
1030	93697	Ice2	NC_000075.7	+	69335514	69335856	69335597	69335856	69334132	69334183	1030	3,4,8	8,3,8	2,1,1	5,6,2	232	149	0.00346565	0.0297319	0.194,0.461,0.391	0.204,0.097,0.243	0.167
3268	378702	Serf2	NC_000068.8	+	121281068	121283901	121281178	121283901	121280455	121280564	3268	24,40,50	31,43,34	36,23,35	52,36,37	259	149	0.00354254	0.0303467	0.308,0.349,0.458	0.285,0.269,0.352	0.07
8851	102633371	Gm14902	NC_000086.8	+	99791796	99791904	99791833	99791904	99784600	99784805	8851	0,1,3	0,3,1	0,1,2	3,0,1	186	149	0.0037245	0.0318585	NA,0.211,0.706	0.0,1.0,0.616	-0.08
3800	73945	Otud4	NC_000074.7	+	80387666	80387764	80387669	80387764	80386026	80386091	3800	122,57,65	69,39,37	54,70,75	73,29,60	152	149	0.00374677	0.0320018	0.634,0.589,0.633	0.42,0.703,0.551	0.061
3666	56736	Rnf14	NC_000084.7	+	38430518	38430628	38430552	38430628	38429653	38429851	3666	10,6,3	9,15,20	8,8,19	13,14,17	183	149	0.00392423	0.0334684	0.475,0.246,0.109	0.334,0.318,0.476	-0.099
2298	277414	Trp53i11	NC_000068.8	+	93026632	93027050	93026864	93027050	93019433	93019568	2298	41,24,15	6,2,1	15,12,5	0,0,1	381	149	0.0040209	0.0342425	0.728,0.824,0.854	1.0,1.0,0.662	-0.085
1784	68028	Rpl22l1	NC_000069.7	+	28860818	28861007	28860885	28861007	28860651	28860741	1784	22,17,22	52,60,60	17,8,11	49,66,86	216	149	0.00403411	0.0343047	0.226,0.163,0.202	0.193,0.077,0.081	0.08
9909	30957	Mapk8ip3	NC_000083.7	-	25136968	25137113	25136968	25137110	25142789	25142881	9909	77,89,75	6,8,15	84,59,63	11,15,21	152	149	0.00423643	0.0359725	0.926,0.916,0.831	0.882,0.794,0.746	0.084
5324	20981	Syt3	NC_000073.7	+	44034644	44035545	44035352	44035545	44034229	44034373	5324	0,1,6	0,0,2	0,0,4	0,0,0	857	149	0.0042684	0.0361911	NA,1.0,0.343	NA,NA,1.0	-0.329
7348	12293	Cacna2d1	NC_000071.7	+	16489869	16501142	16489879	16501142	16472373	16472473	7348	3,0,0	2,0,0	0,1,0	1,0,0	159	149	0.00428314	0.0362631	0.584,NA,NA	0.0,1.0,NA	0.084
10394	54614	Prpf40b	NC_000081.7	+	99214341	99214899	99214345	99214899	99214123	99214261	10394	26,25,43	6,5,1	49,16,42	1,1,3	153	149	0.00432777	0.0365877	0.808,0.83,0.977	0.979,0.94,0.932	-0.079
3199	320790	Chd7	NC_000070.7	+	8856670	8856831	8856673	8856831	8854845	8855514	3199	1,7,6	8,20,20	6,6,7	9,17,13	152	149	0.00436091	0.0368142	0.109,0.255,0.227	0.395,0.257,0.345	-0.135
7296	17245	Mdm1	NC_000076.7	+	117983885	117986861	117986693	117986861	117982499	117982876	7296	77,59,53	2,3,1	34,31,28	0,0,0	2957	149	0.00471869	0.0397767	0.66,0.498,0.728	1.0,1.0,1.0	-0.371
85	229595	Adamtsl4	NC_000069.7	-	95592765	95592981	95592765	95592863	95595131	95595228	85	11,56,42	5,29,27	32,42,26	26,22,32	267	149	0.00510606	0.0429797	0.551,0.519,0.465	0.407,0.516,0.312	0.1
2670	13340	Slc29a2	NC_000085.7	+	5079239	5079348	5079279	5079348	5078868	5078999	2670	29,12,11	4,8,3	8,8,9	2,1,2	189	149	0.00512983	0.0431173	0.851,0.542,0.743	0.759,0.863,0.78	-0.089
8797	68859	Smim1	NC_000070.7	-	154108144	154108348	154108144	154108344	154109960	154110078	8797	2,2,9	0,0,0	4,0,7	0,5,2	153	149	0.00519182	0.0435753	1.0,1.0,1.0	1.0,0.0,0.773	0.409
4750	107817	Jmjd6	NC_000077.7	-	116729815	116730757	116729815	116729954	116731235	116731371	4750	128,57,59	28,35,26	73,51,65	26,34,41	952	149	0.00526962	0.0441008	0.417,0.203,0.262	0.305,0.19,0.199	0.063
4855	74204	Xpo6	NC_000073.7	-	125728719	125728812	125728719	125728809	125730197	125730306	4855	42,30,39	0,3,0	39,30,23	5,0,5	152	149	0.00526235	0.0441008	1.0,0.907,1.0	0.884,1.0,0.818	0.068
4242	19014	Med1	NC_000077.7	-	98042979	98045075	98042979	98043951	98049154	98049295	4242	328449394	7,2,20	369333468	2,3,5	1273	149	0.00529095	0.0442156	0.846,0.963,0.698	0.956,0.929,0.916	-0.098
1607	22751	Zfp90	NC_000074.7	+	107145628	107145829	107145702	107145829	107141958	107142402	1607	6,1,4	10,5,9	0,0,0	5,7,4	223	149	0.00530201	0.0442444	0.286,0.118,0.229	0.0,0.0,0.0	0.211
2652	74552	Nipal3	NC_000070.7	-	135182183	135183680	135182183	135182215	135191096	135191191	2652	56,37,17	6,7,5	23,25,31	3,0,2	1614	149	0.00546119	0.0455073	0.463,0.328,0.239	0.414,1.0,0.589	-0.324
9880	16188	Il3ra	NC_000080.7	-	8121694	8122240	8121694	8121939	8122574	8122753	9880	1,2,12	2,0,0	4,4,5	2,0,2	450	149	0.00563008	0.0468475	0.142,1.0,1.0	0.398,1.0,0.453	0.097
7890	50884	Nckap1	NC_000068.8	-	80385041	80385134	80385041	80385128	80400462	80400573	7890	166109119	8,14,8	143,94,136	2,2,2	155	149	0.00576354	0.0478893	0.952,0.882,0.935	0.986,0.978,0.985	-0.06
9840	70579	Zc3h11a	NC_000067.7	-	133581710	133582176	133581710	133581770	133583082	133583136	9840	253154191	0,7,4	162125162	10,6,12	555	149	0.00586018	0.0486227	1.0,0.855,0.928	0.813,0.848,0.784	0.113
9944	66432	Slc7a6os	NC_000074.7	-	106928862	106928991	106928862	106928983	106930962	106931172	9944	4,2,3	11,29,19	6,6,6	11,12,13	157	149	0.00590594	0.0489325	0.257,0.061,0.13	0.341,0.322,0.305	-0.173
3091	26568	Slc27a3	NC_000069.7	-	90295996	90296228	90295996	90296206	90296478	90298693	3091	3,0,0	0,1,2	1,0,0	2,0,0	171	149	0.00595697	0.049285	1.0,0.0,0.0	0.303,NA,NA	0.03
7550	110751	Adam33	NC_000068.8	-	130893399	130893719	130893399	130893470	130894737	130894882	7550	4,0,0	1,1,3	0,1,2	0,1,0	398	149	0.00598476	0.0494445	0.6,0.0,0.0	NA,0.272,1.0	-0.436
10518	23939	Mapk7	NC_000077.7	-	61383675	61384011	61383675	61383895	61384472	61385099	10518	2,3,5	3,4,7	0,2,3	3,5,6	265	149	0.00601249	0.049576	0.273,0.297,0.287	0.0,0.184,0.219	0.151
6023	193796	Kdm4b	NC_000083.7	+	56701789	56701889	56701795	56701889	56700717	56701106	6023	5,11,7	6,5,5	6,8,9	0,3,4	155	149	0.00601774	0.049576	0.445,0.679,0.574	1.0,0.719,0.684	-0.235

## Sheet: HypoTHvC_A5SS
HypoTH v/s Control_A5SS.TargetAndJunctionCount
ID	GeneID	geneSymbol	chr	strand	longExonStart_0base	longExonEnd	shortES	shortEE	flankingES	flankingEE	ID	IC_SAMPLE_1	SC_SAMPLE_1	IC_SAMPLE_2	SC_SAMPLE_2	IncFormLen	SkipFormLen	PValue	FDR	IncLevel1	IncLevel2	IncLevelDifference
6531	18711	Pikfyve	NC_000067.7	+	65225796	65225992	65225796	65225937	65229477	65229658	6531	5,14,7	0,23,8	20,16,13	4,0,0	204	149	2.40337e-156	1.08873e-152	1.0,0.308,0.39	0.785,1.0,1.0	-0.362
4656	78070	Cpt1c	NC_000073.7	-	44619675	44619966	44619828	44619966	44616481	44616556	4656	0,0,4	2,2,5	2,2,2	0,0,1	302	149	4.62437e-134	1.04742e-130	0.0,0.0,0.283	1.0,1.0,0.497	-0.738
4030	105243241	Gm39214	NC_000074.7	+	86453027	86459114	86453027	86457544	86481132	86481304	4030	184,93,84	0,4,2	45,70,85	7,6,10	1719	149	2.11678e-121	3.19634e-118	1.0,0.668,0.785	0.358,0.503,0.424	0.389
893	83965	Enpp5	NC_000083.7	+	44389692	44389873	44389692	44389789	44391537	44392401	893	24,20,21	0,3,8	0,18,24	16,15,9	233	149	1.75171e-110	1.98381e-107	1.0,0.81,0.627	0.0,0.434,0.63	0.458
2390	66724	Tab3	NC_000086.8	+	84617627	84617928	84617627	84617771	84619155	84619216	2390	13,3,7	5,6,5	10,5,19	2,0,0	306	149	2.00244e-104	1.81421e-101	0.559,0.196,0.405	0.709,1.0,1.0	-0.516
3327	381633	Gm1673	NC_000071.7	+	34140776	34140983	34140776	34140908	34141100	34141240	3327	3,8,4	0,2,0	1,9,1	4,2,2	224	149	5.62574e-101	4.24744e-98	1.0,0.727,1.0	0.143,0.75,0.25	0.528
145	18575	Pde1c	NC_000072.7	-	56059026	56059173	56059113	56059173	56049189	56049360	145	3,9,8	9,1,3	0,2,0	0,2,6	236	149	1.15264e-97	7.45926e-95	0.174,0.85,0.627	NA,0.387,0.0	0.357
6997	21343	Taf6	NC_000071.7	-	138185292	138185495	138185324	138185495	138182593	138182809	6997	0,0,1	1,1,0	1,1,2	2,1,0	181	149	1.86226e-92	1.0545e-89	0.0,0.0,1.0	0.292,0.452,1.0	-0.248
7920	68134	Upf3b	NC_000086.8	-	36361312	36362757	36362718	36362757	36360510	36360671	7920	111,78,72	1,1,6	35,28,57	8,7,5	1555	149	2.32484e-91	1.17017e-88	0.914,0.882,0.535	0.295,0.277,0.522	0.412
8066	71901	Fam219a	NC_000070.7	-	41524314	41524414	41524365	41524414	41521866	41521969	8066	6,9,3	10,15,16	1,0,2	21,19,25	200	149	1.58061e-87	7.16017e-85	0.309,0.309,0.123	0.034,0.0,0.056	0.217
2770	67839	Gpsm1	NC_000068.8	+	26230416	26232442	26230416	26230596	26234613	26234770	2770	672470552	94,43,52	653455572	97134135	1995	149	3.09802e-82	1.27582e-79	0.348,0.449,0.442	0.335,0.202,0.24	0.154
3062	20719	Serpinb6a	NC_000079.7	-	34119555	34119777	34119749	34119777	34115454	34115629	3062	92,56,49	5,3,1	47,33,32	5,4,17	343	149	1.37773e-79	5.20092e-77	0.889,0.89,0.955	0.803,0.782,0.45	0.233
2264	224697	Adamts10	NC_000083.7	+	33757544	33757675	33757544	33757669	33762171	33762279	2264	17,2,6	2,5,2	8,2,3	12,13,6	155	149	2.4625e-79	8.58087e-77	0.891,0.278,0.743	0.391,0.129,0.325	0.356
645	76987	Hdhd2	NC_000084.7	+	77032079	77032227	77032079	77032223	77038808	77038919	645	1,4,4	1,0,0	0,6,7	5,6,2	153	149	1.26698e-78	4.09959e-76	0.493,1.0,1.0	0.0,0.493,0.773	0.409
6221	60440	Iigp1	NC_000084.7	+	60521330	60521442	60521330	60521429	60522863	60525706	6221	1,7,2	8,3,0	2,0,0	1,3,10	162	149	7.49018e-77	2.26203e-74	0.103,0.682,1.0	0.648,0.0,0.0	0.379
4411	28199	Dcaf11	NC_000080.7	+	55797897	55798432	55797897	55798275	55798531	55798876	4411	10,18,15	13,5,11	13,22,22	0,6,2	306	149	2.17686e-75	6.16325e-73	0.272,0.637,0.399	1.0,0.641,0.843	-0.392
2564	77097	Tanc2	NC_000077.7	+	105604207	105604390	105604207	105604279	105649747	105649858	2564	7,5,10	0,7,1	7,8,4	0,2,0	260	149	2.76863e-64	7.37759e-62	1.0,0.29,0.851	1.0,0.696,1.0	-0.185
1349	12121	Bicd1	NC_000072.7	+	149420403	149420721	149420403	149420611	149421850	149422044	1349	0,7,4	0,1,0	1,0,2	0,3,0	259	149	1.66997e-61	4.20275e-59	NA,0.801,1.0	1.0,0.0,1.0	0.234
7440	57752	Tacc2	NC_000073.7	+	130336678	130336973	130336678	130336880	130341541	130341603	7440	228232312	15,16,29	237301312	5,5,0	242	149	2.50619e-60	5.97529e-58	0.903,0.899,0.869	0.967,0.974,1.0	-0.09
768	77480	Kidins220	NC_000078.7	+	25024908	25025086	25024908	25025081	25032235	25032376	768	0,16,9	6,4,1	0,8,9	1,0,1	154	149	6.29738e-60	1.42636e-57	0.0,0.795,0.897	0.0,1.0,0.897	-0.068
2453	100317	AU040320	NC_000070.7	+	126647347	126647560	126647347	126647455	126650691	126650861	2453	0,10,5	0,6,5	3,2,0	6,7,3	254	149	1.29548e-59	2.79453e-57	NA,0.494,0.37	0.227,0.144,0.0	0.308
6597	73692	Cplane1	NC_000081.7	+	8207820	8207932	8207820	8207927	8209241	8209398	6597	4,3,6	38,7,12	1,0,0	14,10,8	154	149	4.48968e-57	9.24466e-55	0.092,0.293,0.326	0.065,0.0,0.0	0.215
2348	72162	Dhx36	NC_000069.7	-	62376250	62378168	62376789	62378168	62375435	62375728	2348	49,40,51	7,5,5	43,42,63	1,1,2	688	149	7.67061e-55	1.51078e-52	0.603,0.634,0.688	0.903,0.901,0.872	-0.25
3776	68095	Ociad1	NC_000071.7	+	73463920	73464141	73463920	73464096	73470785	73471420	3776	18,23,9	8,6,4	32,25,34	4,0,3	194	149	1.85189e-54	3.49545e-52	0.633,0.746,0.633	0.86,1.0,0.897	-0.248
969	18551	Pcsk4	NC_000076.7	-	80157914	80158043	80157969	80158043	80157120	80157755	969	0,5,6	0,3,3	0,5,1	0,0,1	204	149	1.50107e-53	2.71993e-51	NA,0.549,0.594	NA,1.0,0.422	-0.139
1414	320816	Ankrd16	NC_000068.8	+	11784487	11785001	11784487	11784708	11786287	11786330	1414	29,20,36	2,3,8	7,15,11	2,8,9	442	149	5.06169e-53	8.81902e-51	0.83,0.692,0.603	0.541,0.387,0.292	0.302
3465	21400	Tcea2	NC_000068.8	+	181322089	181323030	181322089	181322268	181325005	181325068	3465	10,27,20	8,7,7	17,23,26	3,1,2	911	149	6.91988e-53	1.161e-50	0.17,0.387,0.318	0.481,0.79,0.68	-0.359
2183	66126	Elof1	NC_000075.7	-	22028140	22028491	22028232	22028491	22025103	22025239	2183	6,1,2	1,2,1	3,0,0	5,2,3	241	149	7.51258e-53	1.21543e-50	0.788,0.236,0.553	0.271,0.0,0.0	0.435
2568	319945	Flad1	NC_000069.7	-	89318867	89319188	89319052	89319188	89315728	89316473	2568	1,8,8	0,3,3	2,6,7	1,0,0	334	149	1.8778e-50	2.93326e-48	1.0,0.543,0.543	0.472,1.0,1.0	-0.129
1033	218734	3830406C13Rik	NC_000080.7	-	10185215	10185550	10185429	10185550	10184294	10184378	1033	5,3,8	2,0,7	4,2,2	1,0,1	363	149	2.3903e-50	3.60935e-48	0.506,1.0,0.319	0.621,1.0,0.451	-0.082
8064	11302	Aatk	NC_000077.7	-	119937411	119937971	119937694	119937971	119912227	119912361	8064	8,8,3	6,6,2	2,0,7	1,1,0	432	149	5.29245e-49	7.7338e-47	0.315,0.315,0.341	0.408,0.0,1.0	-0.146
694	13591	Ebf1	NC_000077.7	+	44774640	44774782	44774640	44774758	44798733	44798864	694	18,14,20	0,3,0	7,11,17	3,0,9	173	149	7.73411e-49	1.09486e-46	1.0,0.801,1.0	0.668,1.0,0.619	0.171
691	69944	2810021J22Rik	NC_000077.7	+	58767519	58767691	58767519	58767646	58769601	58769694	691	4,1,3	0,1,7	3,0,0	0,0,1	194	149	1.01665e-47	1.39559e-45	1.0,0.434,0.248	1.0,NA,0.0	0.061
2196	13822	Epb41l2	NC_000076.7	+	25308479	25308781	25308479	25308760	25317470	25317955	2196	7,3,8	0,5,0	4,8,1	7,1,10	170	149	1.63021e-46	2.17202e-44	1.0,0.345,1.0	0.334,0.875,0.081	0.352
2874	13170	Dbp	NC_000073.7	+	45356029	45357138	45356029	45356440	45357683	45357895	2874	289291298	191348361	235105150	444278390	847	149	5.62891e-46	7.28541e-44	0.21,0.128,0.127	0.085,0.062,0.063	0.085
8273	14211	Smc2	NC_000070.7	+	52439220	52439410	52439220	52439334	52440200	52440423	8273	2,0,6	0,2,0	10,3,16	3,7,2	225	149	7.18637e-46	9.04285e-44	1.0,0.0,1.0	0.688,0.221,0.841	0.083
5014	74528	Mgme1	NC_000068.8	+	144112823	144113263	144112823	144112934	144113834	144114404	5014	4,5,3	3,3,4	0,0,3	5,6,7	478	149	8.12672e-45	9.94974e-43	0.294,0.342,0.189	0.0,0.0,0.118	0.236
2262	224697	Adamts10	NC_000083.7	+	33757544	33757686	33757544	33757669	33762171	33762279	2262	12,8,7	2,5,2	14,4,8	12,13,6	166	149	1.27854e-44	1.52416e-42	0.843,0.59,0.759	0.512,0.216,0.545	0.306
3541	13209	Ddx6	NC_000075.7	+	44516188	44516281	44516188	44516224	44518419	44518889	3541	0,6,18	16,0,0	23,24,0	11,5,0	206	149	1.72186e-44	2.00001e-42	0.0,1.0,1.0	0.602,0.776,NA	-0.022
2008	69962	Mettl18	NC_000067.7	+	163822457	163822640	163822457	163822546	163823482	163824812	2008	0,2,1	3,2,8	0,6,3	2,1,4	243	149	1.40927e-43	1.59599e-41	0.0,0.38,0.071	0.0,0.786,0.315	-0.217
6088	225027	Srsf7	NC_000083.7	-	80511550	80511661	80511559	80511661	80510119	80510173	6088	127,46,25	103,57,48	56,35,69	33,19,37	158	149	2.60095e-43	2.87374e-41	0.538,0.432,0.329	0.615,0.635,0.638	-0.196
6337	76932	Arfip2	NC_000073.7	-	105286858	105287247	105287025	105287247	105286327	105286485	6337	21,20,21	8,12,12	8,11,14	21,8,18	316	149	5.78788e-43	6.24264e-41	0.553,0.44,0.452	0.152,0.393,0.268	0.211
3027	246179	Fktn	NC_000070.7	+	53714153	53714546	53714153	53714195	53720006	53720209	3027	22,40,24	7,12,8	26,21,18	26,18,30	500	149	2.43586e-42	2.50783e-40	0.484,0.498,0.472	0.23,0.258,0.152	0.271
796	93697	Ice2	NC_000075.7	+	69305185	69305959	69305185	69305335	69306227	69306369	796	54,33,21	2,6,6	41,21,14	13,10,7	773	149	2.42786e-42	2.50783e-40	0.839,0.515,0.403	0.378,0.288,0.278	0.271
5249	105428	Fam149b	NC_000080.7	+	20402771	20402907	20402771	20402905	20406422	20406565	5249	56,37,30	0,1,3	45,27,46	10,7,4	151	149	4.68343e-41	4.71465e-39	1.0,0.973,0.908	0.816,0.792,0.919	0.118
4968	115489886	LOC115489886	NC_000070.7	-	94364338	94365809	94365249	94365809	94356020	94356102	4968	32,22,15	7,7,15	3,3,17	15,6,11	1060	149	1.71531e-40	1.68921e-38	0.391,0.306,0.123	0.027,0.066,0.178	0.183
263	69232	Qrich1	NC_000075.7	+	108394009	108394451	108394009	108394439	108395965	108396025	263	0,10,10	0,27,9	0,4,1	24,13,24	161	149	1.76672e-40	1.70282e-38	NA,0.255,0.507	0.0,0.222,0.037	0.295
972	18551	Pcsk4	NC_000076.7	-	80159316	80159610	80159506	80159610	80158823	80159009	972	0,4,6	2,0,4	0,1,11	1,0,0	339	149	4.84251e-39	4.57012e-37	0.0,1.0,0.397	0.0,1.0,1.0	-0.201
2590	26457	Slc27a1	NC_000074.7	+	72021985	72022485	72021985	72022092	72023364	72023532	2590	156356378	10,12,11	208219211	26,19,14	542	149	5.34819e-39	4.94435e-37	0.811,0.891,0.904	0.687,0.76,0.806	0.118
7540	73683	Atg16l2	NC_000073.7	-	100940921	100941206	100941085	100941206	100940693	100940799	7540	35,11,10	4,6,7	7,9,10	11,6,8	313	149	3.259e-38	2.95265e-36	0.806,0.466,0.405	0.233,0.417,0.373	0.218
2103	235043	Tmem205	NC_000075.7	-	21838582	21838831	21838587	21838831	21837544	21837653	2103	0,6,15	15,97,112	31,25,44	142135138	154	149	7.90838e-35	7.0245e-33	0.0,0.056,0.115	0.174,0.152,0.236	-0.13
2589	26457	Slc27a1	NC_000074.7	+	72021985	72022240	72021985	72022092	72023364	72023532	2589	31159169	10,12,11	88,93,87	26,19,14	297	149	1.1435e-34	9.96166e-33	0.609,0.869,0.885	0.629,0.711,0.757	0.089
6192	12972	Cryz	NC_000069.7	+	154302833	154303183	154302833	154303149	154310528	154310652	6192	0,0,2	2,1,3	0,2,4	2,1,0	183	149	2.9332e-34	2.50706e-32	0.0,0.0,0.352	0.0,0.62,1.0	-0.423
3227	108652	Slc35b3	NC_000079.7	-	39117431	39118783	39118713	39118783	39116280	39116892	3227	54,47,49	11,4,9	46,31,39	3,0,3	1431	149	1.65342e-33	1.38704e-31	0.338,0.55,0.362	0.615,1.0,0.575	-0.313
5028	244667	Disc1	NC_000074.7	+	125987753	125987890	125987753	125987888	125988334	125991882	5028	1,3,4	3,6,3	5,1,10	1,0,5	151	149	1.42891e-32	1.1769e-30	0.248,0.33,0.568	0.831,1.0,0.664	-0.45
2139	319740	Zfyve27	NC_000085.7	+	42159005	42159224	42159005	42159107	42159984	42160182	2139	43,58,37	1,5,4	34,18,40	2,8,11	266	149	5.70584e-32	4.61561e-30	0.96,0.867,0.838	0.905,0.558,0.671	0.177
5682	72392	Tmem175	NC_000071.7	+	108777648	108777909	108777648	108777766	108786102	108786356	5682	24,20,12	0,14,2	25,19,34	0,6,0	292	149	3.22014e-31	2.55916e-29	1.0,0.422,0.754	1.0,0.618,1.0	-0.147
2731	23856	Dido1	NC_000068.8	-	180351255	180351856	180351406	180351856	180333656	180333841	2731	16,29,20	9,5,5	15,12,21	3,0,2	300	149	3.57281e-31	2.79048e-29	0.469,0.742,0.665	0.713,1.0,0.839	-0.225
5798	54613	St3gal6	NC_000082.7	-	58343679	58344035	58343864	58344035	58327810	58327977	5798	3,6,15	1,27,29	30,20,32	49,45,49	334	149	1.69981e-30	1.3051e-28	0.572,0.09,0.187	0.215,0.165,0.226	0.081
3524	77862	Thyn1	NC_000075.7	+	26917647	26918247	26917647	26917743	26918453	26918632	3524	36,71,43	14,14,8	62,32,57	20,25,30	653	149	4.84325e-30	3.65666e-28	0.37,0.536,0.551	0.414,0.226,0.302	0.172
5496	56706	Ccnl1	NC_000069.7	-	65860157	65862697	65862550	65862697	65858854	65858975	5496	712402335	3,3,1	407285375	3,11,4	2542	149	6.77193e-30	5.02899e-28	0.933,0.887,0.952	0.888,0.603,0.846	0.145
692	13591	Ebf1	NC_000077.7	+	44774640	44774782	44774640	44774758	44798730	44798864	692	14,14,3	0,0,3	4,7,7	1,1,5	173	149	1.07106e-29	7.82563e-28	1.0,1.0,0.463	0.775,0.858,0.547	0.094
2533	67046	Tbc1d7	NC_000079.7	-	43324784	43324977	43324804	43324977	43323277	43323423	2533	18,30,18	9,21,15	28,34,45	9,10,13	169	149	1.48886e-29	1.07056e-27	0.638,0.557,0.514	0.733,0.75,0.753	-0.176
7655	17134	Mafg	NC_000077.7	-	120520806	120520842	120520811	120520842	120520643	120520707	7655	1,4,4	11,8,1	0,2,4	12,24,31	154	149	2.8614e-29	2.02534e-27	0.081,0.326,0.795	0.0,0.075,0.111	0.339
253	21886	Tle2	NC_000076.7	+	81422046	81422207	81422046	81422171	81422691	81422762	253	10,8,4	1,10,8	0,3,2	5,6,2	185	149	5.29734e-29	3.69184e-27	0.89,0.392,0.287	0.0,0.287,0.446	0.279
1801	232566	Amn1	NC_000072.7	-	149089969	149090193	149090103	149090193	149084963	149085036	1801	5,15,14	8,8,9	15,13,9	6,2,2	283	149	8.12382e-29	5.57589e-27	0.248,0.497,0.45	0.568,0.774,0.703	-0.283
4757	72397	Rbm12b1	NC_000070.7	+	12140120	12140446	12140120	12140401	12140540	12140605	4757	0,0,7	1,1,1	1,1,3	2,11,5	194	149	1.06115e-28	7.15911e-27	0.0,0.0,0.843	0.277,0.065,0.315	0.062
7265	69162	Sec31a	NC_000071.7	-	100521238	100521574	100521283	100521574	100517454	100517493	7265	0,21,24	1,2,2	13,9,16	0,3,7	194	149	1.07466e-28	7.15911e-27	0.0,0.89,0.902	1.0,0.697,0.637	-0.181
7704	114604	Prdm15	NC_000082.7	-	97618048	97618245	97618150	97618245	97617735	97617830	7704	2,3,2	4,1,0	7,1,8	0,1,2	251	149	4.76997e-28	3.13159e-26	0.229,0.64,1.0	1.0,0.372,0.704	-0.069
2658	67884	Cfap410	NC_000076.7	+	77815586	77815885	77815586	77815605	77816334	77816381	2658	16,6,11	33,25,12	3,6,1	33,40,17	429	149	5.73189e-28	3.70935e-26	0.144,0.077,0.241	0.031,0.05,0.02	0.12
8060	69064	Fuom	NC_000073.7	-	139679715	139679865	139679791	139679865	139679382	139679619	8060	8,20,14	18,47,41	8,7,14	54,81,68	225	149	7.44211e-28	4.74827e-26	0.227,0.22,0.184	0.089,0.054,0.12	0.123
685	22186	Uba52	NC_000074.7	-	70962767	70963067	70962987	70963067	70962170	70962284	685	39318331	1212213	272308290	271273243	369	149	8.43943e-28	5.30981e-26	0.94,0.377,0.386	0.288,0.313,0.325	0.259
7531	20742	Sptbn1	NC_000077.7	-	30055442	30059152	30059088	30059152	30054435	30054674	7531	970396319520	58511391089	745659707710	92610161163	3795	149	1.85194e-27	1.14922e-25	0.394,0.249,0.256	0.24,0.187,0.207	0.088
212	22200	Uba3	NC_000072.7	-	97181368	97182308	97181875	97182308	97180434	97180555	212	29,35,39	2,0,0	23,33,28	5,1,0	656	149	1.9545e-27	1.19647e-25	0.767,1.0,1.0	0.511,0.882,1.0	0.125
1514	224432	Scaf4	NC_000082.7	-	90046514	90046600	90046526	90046600	90045400	90045591	1514	8,14,14	44,23,21	19,14,15	4,22,27	161	149	2.7683e-27	1.67205e-25	0.144,0.36,0.382	0.815,0.371,0.34	-0.213
341	20239	Atxn2	NC_000071.7	+	121949447	121951616	121949447	121949675	121952400	121954372	341	507280335	11,74,60	293366373	86,75,80	2090	149	4.39446e-27	2.61933e-25	0.767,0.212,0.285	0.195,0.258,0.249	0.187
3543	13209	Ddx6	NC_000075.7	+	44516188	44516281	44516188	44516249	44518419	44518889	3543	0,6,18	23,31,43	23,24,0	0,38,36	181	149	1.33687e-26	7.86498e-25	0.0,0.137,0.256	1.0,0.342,0.0	-0.316
5379	94178	Mcoln1	NC_000074.7	+	3562649	3563555	3562649	3562865	3564782	3564913	5379	40,54,35	4,32,29	33,32,35	38,34,38	839	149	1.7447e-26	1.01327e-24	0.64,0.231,0.177	0.134,0.143,0.141	0.21
7348	73750	Whrn	NC_000070.7	-	63350061	63350296	63350086	63350296	63337658	63337730	7348	6,0,0	9,8,3	0,1,2	5,1,10	174	149	4.46526e-26	2.56046e-24	0.363,0.0,0.0	0.0,0.461,0.146	-0.081
1195	74249	Lrrc2	NC_000075.7	+	110786867	110787024	110786867	110787014	110791582	110791739	1195	6,1,2	5,2,9	6,6,6	0,1,7	159	149	8.15492e-26	4.61772e-24	0.529,0.319,0.172	1.0,0.849,0.445	-0.425
4857	11488	Adam11	NC_000077.7	+	102662870	102662938	102662870	102662934	102663280	102663355	4857	23,35,31	0,7,7	22,11,23	1,0,0	153	149	8.30431e-26	4.64426e-24	1.0,0.83,0.812	0.955,1.0,1.0	-0.104
4761	51796	Srrm1	NC_000070.7	-	135065859	135065897	135065872	135065897	135065114	135065389	4761	1,0,9	0,1,2	1,2,7	0,1,5	162	149	1.06324e-25	5.87377e-24	1.0,0.0,0.805	1.0,0.648,0.563	-0.135
6907	56448	Cyp2d22	NC_000081.7	-	82264272	82264461	82264278	82264461	82259993	82260242	6907	2,0,9	53,57,46	6,5,7	24,22,21	155	149	1.30828e-25	7.14035e-24	0.035,0.0,0.158	0.194,0.179,0.243	-0.141
196	22680	Zfp207	NC_000077.7	+	80293471	80293550	80293471	80293537	80294190	80299387	196	5,5,8	1,6,3	3,5,5	0,2,1	162	149	2.20485e-25	1.18905e-23	0.821,0.434,0.71	1.0,0.697,0.821	-0.184
252	21886	Tle2	NC_000076.7	+	81422046	81422207	81422046	81422171	81422688	81422762	252	6,3,4	0,5,0	1,1,0	4,1,0	185	149	3.12656e-25	1.66627e-23	1.0,0.326,1.0	0.168,0.446,NA	0.468
7628	226976	Kansl3	NC_000067.7	-	36406830	36407115	36406849	36407115	36404562	36404713	7628	13,13,9	5,4,7	9,16,16	2,0,4	168	149	5.55997e-25	2.92868e-23	0.698,0.742,0.533	0.8,1.0,0.78	-0.202
5027	213464	Rbbp5	NC_000067.7	+	132412483	132412656	132412483	132412539	132417325	132417466	5027	32,26,27	14,7,5	33,34,49	6,3,5	266	149	7.17943e-25	3.73825e-23	0.561,0.675,0.752	0.755,0.864,0.846	-0.159
5508	72635	Lins1	NC_000073.7	+	66359041	66359243	66359041	66359183	66359977	66360494	5508	6,1,0	1,4,0	1,1,0	0,4,5	209	149	1.3832e-24	7.12035e-23	0.811,0.151,NA	1.0,0.151,0.0	0.097
4033	65963	Tmem176b	NC_000072.7	-	48817929	48818308	48818281	48818308	48815105	48815299	4033	2,36,41	0,2,0	33,14,25	2,2,2	501	149	2.04485e-24	1.04081e-22	1.0,0.843,1.0	0.831,0.676,0.788	0.183
667	18201	Nsmaf	NC_000070.7	-	6417431	6417877	6417745	6417877	6417164	6417207	667	103,96,83	44,46,54	39,56,61	72,57,57	463	149	2.28693e-24	1.15109e-22	0.43,0.402,0.331	0.148,0.24,0.256	0.173
1118	216565	Ehbp1	NC_000077.7	-	22039455	22039668	22039584	22039668	22018358	22018506	1118	39,81,72	3,13,14	78,62,90	35,15,21	278	149	5.73156e-24	2.85318e-22	0.874,0.77,0.734	0.544,0.689,0.697	0.149
3391	19826	Rnps1	NC_000083.7	+	24634014	24634479	24634014	24634136	24637011	24637192	3391	62,30,45	19,84,66	18,26,29	57,62,73	492	149	7.76787e-24	3.82483e-22	0.497,0.098,0.171	0.087,0.113,0.107	0.153
322	76376	Slc24a2	NC_000070.7	-	86994301	86994394	86994355	86994394	86991424	86991533	322	6,1,0	0,0,1	1,0,2	0,0,2	203	149	3.16398e-23	1.54116e-21	1.0,1.0,0.0	1.0,NA,0.423	-0.045
2599	26457	Slc27a1	NC_000074.7	+	72021514	72021681	72021514	72021667	72022839	72022956	2599	4,9,10	0,0,3	4,11,12	1,3,5	163	149	7.29765e-23	3.51685e-21	1.0,1.0,0.753	0.785,0.77,0.687	0.17
7703	114604	Prdm15	NC_000082.7	-	97618063	97618245	97618150	97618245	97617735	97617830	7703	2,3,3	4,1,0	8,3,9	0,1,2	236	149	9.10941e-23	4.34375e-21	0.24,0.654,1.0	1.0,0.654,0.74	-0.167
5683	72392	Tmem175	NC_000071.7	+	108777648	108778187	108777648	108777766	108786102	108786356	5683	25,37,31	0,14,2	35,24,47	0,6,0	570	149	1.5058e-22	7.10549e-21	1.0,0.409,0.802	1.0,0.511,1.0	-0.1
7065	18793	Plaur	NC_000073.7	+	24173634	24173937	24173634	24173781	24174663	24175393	7065	2,3,4	2,6,2	0,4,0	7,6,8	305	149	1.60557e-22	7.49818e-21	0.328,0.196,0.494	0.0,0.246,0.0	0.257
7907	13607	Eda	NC_000086.8	+	99438624	99438755	99438624	99438749	99440510	99444366	7907	0,5,1	1,5,1	0,2,0	5,1,0	155	149	5.45575e-22	2.52189e-20	0.0,0.49,0.49	0.0,0.658,NA	-0.002
1740	225887	Ndufs8	NC_000085.7	-	3962466	3962774	3962469	3962774	3961688	3961746	1740	103134104	6,11,5	159170195	28,25,34	152	149	8.67455e-22	3.96926e-20	0.944,0.923,0.953	0.848,0.87,0.849	0.084
6133	20441	St3gal3	NC_000070.7	-	117991600	117992093	117991930	117992093	117964745	117964890	6133	167192194	15,34,37	182229251	22,19,15	479	149	1.53574e-21	6.95692e-20	0.776,0.637,0.62	0.72,0.789,0.839	-0.105
3013	105203	Tasor2	NC_000079.7	-	3631751	3632193	3632081	3632193	3623486	3627200	3013	106,83,91	14,8,4	59,70,85	1,2,5	479	149	1.77579e-21	7.96468e-20	0.702,0.763,0.876	0.948,0.916,0.841	-0.121
3282	226591	Tiprl	NC_000067.7	-	165063946	165064529	165064240	165064529	165055836	165056016	3282	30,27,16	1,4,0	21,11,19	4,0,6	443	149	4.19647e-21	1.86373e-19	0.91,0.694,1.0	0.638,1.0,0.516	0.15
1908	14772	Grk4	NC_000071.7	+	34831877	34832278	34831877	34831990	34833453	34833528	1908	3,2,20	3,2,0	5,0,4	3,0,2	437	149	5.32216e-21	2.34072e-19	0.254,0.254,1.0	0.362,NA,0.405	0.119
6011	73218	Sppl2b	NC_000076.7	+	80702333	80702823	80702333	80702549	80703233	80704542	6011	5,13,6	1,2,2	18,2,13	0,1,0	423	149	1.13344e-20	4.93702e-19	0.638,0.696,0.514	1.0,0.413,1.0	-0.188
2783	18682	Phkg1	NC_000071.7	-	129901915	129902111	129902056	129902111	129898301	129898367	2783	0,0,3	5,8,13	10,9,15	45,43,49	290	149	1.23055e-20	5.30896e-19	0.0,0.0,0.106	0.102,0.097,0.136	-0.076
208	12704	Cit	NC_000071.7	+	116071456	116071714	116071456	116071627	116071879	116071930	208	0,2,0	3,1,1	0,0,1	0,1,0	236	149	2.35598e-20	1.00685e-18	0.0,0.558,0.0	NA,0.0,1.0	-0.314
3503	109151	Chd9	NC_000074.7	+	91662273	91682310	91662273	91681957	91683010	91683342	3503	23,34,30	8,8,1	29,43,73	6,5,0	502	149	1.48001e-19	6.26582e-18	0.46,0.558,0.899	0.589,0.719,1.0	-0.13
3228	20787	Srebf1	NC_000077.7	-	60096998	60097136	60097013	60097136	60096681	60096903	3228	233192236	13,33,42	51,37,27	0,2,4	164	149	2.26278e-19	9.40405e-18	0.942,0.841,0.836	1.0,0.944,0.86	-0.062
6585	69459	Ubl7	NC_000075.7	+	57818268	57818342	57818268	57818290	57819920	57820133	6585	41,78,42	0,6,17	67,35,0	8,9,0	201	149	2.24717e-19	9.40405e-18	1.0,0.906,0.647	0.861,0.742,NA	0.049
4895	232196	C87436	NC_000072.7	+	86415591	86416240	86415591	86415829	86420708	86420957	4895	20,62,32	4,0,8	22,21,36	6,9,5	560	149	2.82438e-19	1.16313e-17	0.571,1.0,0.516	0.494,0.383,0.657	0.184
5185	224023	Klhl22	NC_000082.7	+	17577504	17578214	17577504	17577558	17582247	17582510	5185	30,30,23	11,5,7	27,21,30	12,20,14	805	149	3.20381e-19	1.3075e-17	0.335,0.526,0.378	0.294,0.163,0.284	0.166
6159	94353	Hmgn3	NC_000075.7	-	82993045	82993159	82993086	82993159	82991994	82992482	6159	3,4,4	3,0,12	8,2,12	3,5,1	190	149	3.79884e-19	1.5365e-17	0.44,1.0,0.207	0.677,0.239,0.904	-0.058
7087	71728	Stk11ip	NC_000067.7	+	75501326	75501587	75501326	75501532	75501731	75501806	7087	5,3,5	30,17,20	0,0,2	14,18,20	204	149	8.65068e-19	3.46793e-17	0.109,0.114,0.154	0.0,0.0,0.068	0.103
4461	102632007	Gm30188	NC_000084.7	-	38253478	38253594	38253490	38253594	38250291	38253359	4461	1,3,11	8,3,2	2,2,0	1,6,2	161	149	1.16928e-18	4.64636e-17	0.104,0.481,0.836	0.649,0.236,0.0	0.179
7561	67727	Stx17	NC_000070.7	+	48124911	48125066	48124911	48124958	48131764	48131949	7561	10,4,18	19,29,16	5,4,8	27,33,28	257	149	1.21288e-18	4.77771e-17	0.234,0.074,0.395	0.097,0.066,0.142	0.133
7984	380969	Nckap5l	NC_000081.7	-	99333907	99333968	99333925	99333968	99331920	99332070	7984	9,13,0	1,0,0	2,11,17	2,2,4	167	149	1.75213e-18	6.84237e-17	0.889,1.0,NA	0.472,0.831,0.791	0.247
114	223435	Trio	NC_000081.7	-	27742389	27742596	27742469	27742596	27741337	27741365	114	5,11,6	0,2,2	19,6,14	4,3,8	229	149	1.88336e-18	7.29199e-17	1.0,0.782,0.661	0.756,0.565,0.532	0.197
3059	20719	Serpinb6a	NC_000079.7	-	34119551	34119777	34119749	34119777	34115454	34115629	3059	65,66,53	5,3,1	51,43,51	5,4,17	347	149	2.05502e-18	7.88918e-17	0.848,0.904,0.958	0.814,0.822,0.563	0.17
1648	99167	Ssx2ip	NC_000069.7	+	146110396	146110690	146110396	146110539	146123361	146123545	1648	39,40,9	1,29,19	27,22,32	0,2,13	300	149	2.79686e-18	1.06469e-16	0.951,0.407,0.19	1.0,0.845,0.55	-0.282
8207	217370	Cybc1	NC_000077.7	-	121119864	121120135	121119884	121120135	121119153	121119296	8207	11,12,10	0,2,2	12,7,16	9,0,2	169	149	3.56865e-18	1.34717e-16	1.0,0.841,0.815	0.54,1.0,0.876	0.08
1248	19377	Rai1	NC_000077.7	+	60084764	60088177	60084764	60084858	60088614	60088664	1248	275269279	7,30,28	197169240	21,27,36	3468	149	3.82486e-18	1.43195e-16	0.628,0.278,0.3	0.287,0.212,0.223	0.161
5146	227525	Dclre1c	NC_000068.8	+	3438066	3438127	3438066	3438123	3438712	3438785	5146	0,5,9	1,1,1	6,8,12	6,0,0	153	149	5.49521e-18	2.04043e-16	0.0,0.83,0.898	0.493,1.0,1.0	-0.255
412	105246	Brd9	NC_000079.7	+	74090062	74090714	74090062	74090173	74090812	74090925	412	47,33,32	9,8,11	12,19,18	8,10,7	690	149	6.91292e-18	2.54598e-16	0.53,0.471,0.386	0.245,0.291,0.357	0.165
808	73827	Tmem198b	NC_000076.7	-	128639870	128640316	128640101	128640316	128638966	128639226	808	12,10,21	9,7,7	11,13,3	11,5,18	380	149	7.73463e-18	2.82563e-16	0.343,0.359,0.541	0.282,0.505,0.061	0.132
3406	191578	Helq	NC_000071.7	-	100944031	100944928	100944219	100944928	100940529	100940708	3406	5,2,4	4,2,2	1,2,1	2,1,4	337	149	1.478e-17	5.35626e-16	0.356,0.307,0.469	0.181,0.469,0.1	0.127
4379	67040	Ddx17	NC_000081.7	-	79415872	79416115	79415878	79416115	79411896	79414718	4379	54,63,73	109,102,94	88,63,78	79,63,93	155	149	2.03058e-17	7.30042e-16	0.323,0.373,0.427	0.517,0.49,0.446	-0.11
2436	18080	Nin	NC_000078.7	-	70072153	70072255	70072180	70072255	70067607	70067805	2436	2,12,11	13,6,9	20,7,13	6,8,6	176	149	2.0716e-17	7.38925e-16	0.115,0.629,0.509	0.738,0.426,0.647	-0.186
5187	224023	Klhl22	NC_000082.7	+	17577504	17578118	17577504	17577558	17582247	17582510	5187	31,24,21	11,5,7	27,23,24	12,20,14	709	149	6.62207e-17	2.34359e-15	0.372,0.502,0.387	0.321,0.195,0.265	0.16
4787	76784	Mtif2	NC_000077.7	+	29476396	29476565	29476396	29476487	29479928	29480154	4787	1,1,1	7,12,2	2,2,6	5,15,4	227	149	9.95907e-17	3.49726e-15	0.086,0.052,0.247	0.208,0.08,0.496	-0.133
183	103135	Pan2	NC_000076.7	+	128139963	128140362	128139963	128140258	128143933	128144103	183	36,27,27	11,7,6	11,18,29	2,0,1	253	149	1.26029e-16	4.39164e-15	0.658,0.694,0.726	0.764,1.0,0.945	-0.21
1659	11796	Birc3	NC_000075.7	-	7872990	7873199	7873056	7873199	7860463	7861408	1659	1,8,2	0,4,1	8,2,13	0,3,0	215	149	1.52485e-16	5.27297e-15	1.0,0.581,0.581	1.0,0.316,1.0	-0.051
7790	22678	Zfp2	NC_000077.7	-	50801532	50801703	50801576	50801703	50801262	50801352	7790	5,8,10	1,9,2	5,12,6	2,0,1	193	149	1.78235e-16	6.11671e-15	0.794,0.407,0.794	0.659,1.0,0.822	-0.162
4612	231148	Ablim2	NC_000071.7	+	36031976	36032037	36031976	36031984	36032176	36032257	4612	4,0,0	1,2,0	2,1,4	20,0,0	202	149	1.81115e-16	6.1688e-15	0.747,0.0,NA	0.069,1.0,1.0	-0.316
1093	54169	Kat6b	NC_000080.7	+	21674900	21675283	21674900	21674956	21676786	21676908	1093	27,58,58	9,26,24	52,31,54	3,9,1	476	149	3.47863e-16	1.17598e-14	0.484,0.411,0.431	0.844,0.519,0.944	-0.327
3025	22061	Trp63	NC_000082.7	+	25684824	25684961	25684824	25684949	25686916	25686999	3025	1,1,7	0,1,2	4,1,0	2,0,3	161	149	5.48791e-16	1.8415e-14	1.0,0.481,0.764	0.649,1.0,0.0	0.199
5829	67178	Zmat5	NC_000077.7	+	4654655	4654721	4654655	4654712	4672357	4672511	5829	6,17,10	13,16,18	11,7,11	25,29,31	158	149	5.92321e-16	1.97295e-14	0.303,0.5,0.344	0.293,0.185,0.251	0.139
2023	19346	Rab6a	NC_000073.7	+	100278872	100279150	100278872	100278978	100280948	100281060	2023	16149112	65,78,53	164148159	41,47,79	321	149	9.04197e-16	2.98979e-14	0.103,0.47,0.495	0.65,0.594,0.483	-0.22
1989	12211	Birc6	NC_000083.7	+	74915091	74915279	74915091	74915180	74916053	74916383	1989	122,95,84	2,10,6	72,90,85	11,12,12	248	149	1.02049e-15	3.34986e-14	0.973,0.851,0.894	0.797,0.818,0.81	0.098
6134	20441	St3gal3	NC_000070.7	-	117991586	117992143	117991930	117992143	117964745	117964890	6134	226273270	15,34,37	262295345	22,19,15	493	149	1.55731e-15	5.07526e-14	0.82,0.708,0.688	0.783,0.824,0.874	-0.088
3693	192195	Ash1l	NC_000069.7	+	88907034	88907231	88907034	88907182	88909079	88909181	3693	0,1,8	0,0,2	3,3,1	2,2,1	198	149	1.68181e-15	5.44184e-14	NA,1.0,0.751	0.53,0.53,0.429	0.379
976	13048	Cux2	NC_000071.7	-	122187838	122188522	122188078	122188522	122062867	122062978	976	2,0,0	0,3,0	3,1,0	3,3,0	389	149	2.4901e-15	8.00012e-14	1.0,0.0,NA	0.277,0.113,NA	0.305
7170	52430	Echdc2	NC_000070.7	+	108027057	108027423	108027057	108027145	108029285	108029372	7170	175,81,100	17,58,52	55,44,46	42,42,60	427	149	3.74343e-15	1.19421e-13	0.782,0.328,0.402	0.314,0.268,0.211	0.24
1311	69185	Dtwd1	NC_000068.8	+	125994060	125994497	125994060	125994134	125996465	125996780	1311	0,3,12	0,2,3	1,3,4	8,4,4	512	149	4.22545e-15	1.33855e-13	NA,0.304,0.538	0.035,0.179,0.225	0.275
631	22022	Tpst2	NC_000071.7	+	112455431	112456420	112455431	112456343	112457554	112457753	631	26,11,2	61,40,36	4,6,5	44,53,42	226	149	5.85884e-15	1.84309e-13	0.219,0.153,0.035	0.057,0.069,0.073	0.069
924	19882	Mst1r	NC_000075.7	+	107784087	107785607	107784087	107785579	107788718	107788907	924	11,0,3	0,1,0	3,0,0	6,1,4	177	149	6.52567e-15	2.03871e-13	1.0,0.0,1.0	0.296,0.0,0.0	0.568
17	234371	Tmem161a	NC_000074.7	+	70633355	70633518	70633355	70633499	70633798	70633973	17	6,3,1	15,2,5	0,2,0	2,5,15	168	149	6.96576e-15	2.16129e-13	0.262,0.571,0.151	0.0,0.262,0.0	0.241
2766	22612	Yes1	NC_000071.7	+	32768514	32769181	32768514	32768719	32802351	32802451	2766	78101128	0,1,0	70,66,74	0,4,5	611	149	9.6401e-15	2.95065e-13	1.0,0.961,1.0	1.0,0.801,0.783	0.126
3689	666532	Zfp991	NC_000070.7	+	147216394	147216861	147216394	147216817	147219028	147219121	3689	5,0,1	0,0,5	4,0,2	0,1,2	193	149	9.60883e-15	2.95065e-13	1.0,NA,0.134	1.0,0.0,0.436	0.088
4684	22596	Xrcc5	NC_000067.7	+	72346579	72347019	72346579	72346726	72349593	72349707	4684	14,24,15	20,29,18	25,14,16	10,14,11	442	149	1.91712e-14	5.82857e-13	0.191,0.218,0.219	0.457,0.252,0.329	-0.137
4875	211660	Cspp1	NC_000067.7	+	10109986	10110112	10109986	10110104	10115300	10115409	4875	0,1,0	0,5,15	2,1,3	12,8,6	157	149	3.11735e-14	9.41439e-13	NA,0.16,0.0	0.137,0.106,0.322	-0.108
5149	27054	Sec23b	NC_000068.8	+	144398148	144398262	144398148	144398244	144401126	144401361	5149	0,1,4	10,8,0	3,17,4	0,0,0	167	149	3.52917e-14	1.05875e-12	0.0,0.1,1.0	1.0,1.0,1.0	-0.633
2402	73430	Zfp974	NC_000073.7	-	27628698	27629124	27628719	27629124	27626825	27626878	2402	0,1,0	17,10,10	2,2,3	10,2,19	170	149	4.07856e-14	1.20757e-12	0.0,0.081,0.0	0.149,0.467,0.122	-0.219
449	20520	Slc22a5	NC_000077.7	-	53766814	53766989	53766834	53766989	53765760	53765932	449	17,6,1	40,11,12	7,2,1	28,25,32	169	149	4.06538e-14	1.20757e-12	0.273,0.325,0.068	0.181,0.066,0.027	0.131
7373	23877	Fiz1	NC_000073.7	-	5017535	5017727	5017623	5017727	5015676	5016021	7373	1,6,5	13,28,31	9,6,9	15,20,22	237	149	4.70987e-14	1.38544e-12	0.046,0.119,0.092	0.274,0.159,0.205	-0.127
5988	13858	Eps15	NC_000070.7	+	109178324	109178522	109178324	109178414	109179266	109179412	5988	90,37,46	89,32,30	54,46,56	17,25,29	257	149	6.11477e-14	1.78709e-12	0.37,0.401,0.471	0.648,0.516,0.528	-0.15
6588	53334	Gosr1	NC_000077.7	-	76652060	76652181	76652066	76652181	76645538	76645626	6588	64,58,69	4,13,7	65,66,83	1,4,2	155	149	8.7033e-14	2.52731e-12	0.939,0.811,0.905	0.984,0.941,0.976	-0.082
1518	21781	Tfdp1	NC_000074.7	+	13388763	13389440	13388763	13389146	13389664	13389739	1518	21,10,12	0,0,2	14,12,14	1,2,3	443	149	9.38614e-14	2.70823e-12	1.0,1.0,0.669	0.825,0.669,0.611	0.188
1481	233056	Zfp790	NC_000073.7	+	29510861	29518623	29510861	29515714	29522408	29522569	1481	75,98,127	11,3,0	63,71,60	4,0,0	3058	149	9.94292e-14	2.85072e-12	0.249,0.614,1.0	0.434,1.0,1.0	-0.19
5335	68385	Tlcd1	NC_000077.7	+	78069483	78070047	78069483	78069882	78070195	78070278	5335	3,6,8	0,1,1	3,4,1	2,8,8	314	149	2.00358e-13	5.70831e-12	1.0,0.74,0.792	0.416,0.192,0.056	0.623
3183	71302	Arhgap26	NC_000084.7	+	39490605	39490881	39490605	39490716	39496169	39496261	3183	52,28,50	22,37,39	55,40,60	47,65,81	314	149	2.15904e-13	6.11279e-12	0.529,0.264,0.378	0.357,0.226,0.26	0.109
5718	268706	Slc38a9	NC_000079.7	+	112797190	112797406	112797190	112797343	112806120	112806265	5718	11,31,15	0,5,0	18,39,23	6,4,5	212	149	2.21111e-13	6.22133e-12	1.0,0.813,1.0	0.678,0.873,0.764	0.166
797	93697	Ice2	NC_000075.7	+	69305185	69305781	69305185	69305335	69306227	69306369	797	24,26,20	2,6,6	44,21,11	13,10,7	595	149	3.15163e-13	8.81288e-12	0.75,0.52,0.455	0.459,0.345,0.282	0.213
4735	54194	Akap8l	NC_000083.7	-	32552879	32553670	32553561	32553670	32551976	32552118	4735	170229225	16,59,47	108100106	40,45,56	831	149	3.2105e-13	8.92244e-12	0.656,0.41,0.462	0.326,0.285,0.253	0.221
1445	67889	Rbm18	NC_000068.8	-	36017192	36017263	36017226	36017263	36012863	36012950	1445	0,1,3	0,5,9	0,1,2	3,0,2	183	149	4.39955e-13	1.21524e-11	NA,0.14,0.213	0.0,1.0,0.449	-0.307
2981	66163	Mrpl4	NC_000075.7	+	20918122	20918240	20918122	20918152	20918659	20918836	2981	0,9,1	3,6,7	0,4,1	0,0,2	237	149	5.44416e-13	1.49467e-11	0.0,0.485,0.082	NA,1.0,0.239	-0.43
8237	20229	Sat1	NC_000086.8	-	153998116	153998680	153998596	153998680	153997028	153997130	8237	48,28,41	62,36,29	60,45,50	28,24,44	629	149	5.50267e-13	1.50163e-11	0.155,0.156,0.251	0.337,0.308,0.212	-0.098
4107	235633	Als2cl	NC_000075.7	+	110719152	110719251	110719152	110719247	110719368	110719530	4107	16,12,12	5,4,1	16,19,13	0,1,3	153	149	6.68611e-13	1.81366e-11	0.757,0.745,0.921	1.0,0.949,0.808	-0.111
7982	320806	Gfm2	NC_000079.7	+	97274444	97274567	97274444	97274534	97278434	97278518	7982	24,47,39	4,11,18	47,50,39	25,21,29	182	149	8.47928e-13	2.28638e-11	0.831,0.778,0.639	0.606,0.661,0.524	0.152
5068	232337	Zfp637	NC_000072.7	+	117820213	117820567	117820213	117820353	117821943	117822917	5068	0,7,9	6,3,0	1,7,10	4,0,0	363	149	8.93211e-13	2.39423e-11	0.0,0.489,1.0	0.093,1.0,1.0	-0.201
3811	72507	Dzip1l	NC_000075.7	+	99545578	99546526	99545578	99545769	99547767	99547907	3811	12,24,22	9,5,10	10,6,9	6,11,5	906	149	1.15822e-12	3.08631e-11	0.18,0.441,0.266	0.215,0.082,0.228	0.121
3661	382038	Urb2	NC_000074.7	+	124748235	124748546	124748235	124748265	124750198	124750337	3661	10,16,13	0,1,3	4,26,21	0,4,6	430	149	1.20714e-12	3.19787e-11	1.0,0.847,0.6	1.0,0.693,0.548	0.069
562	106205	Zc3h7a	NC_000082.7	-	10963043	10963149	10963105	10963149	10959526	10959635	562	87,45,37	12,5,7	36,22,19	7,4,14	211	149	1.25767e-12	3.31235e-11	0.837,0.864,0.789	0.784,0.795,0.489	0.141
6474	102635368	Gm32725	NC_000071.7	-	36869913	36870868	36870077	36870868	36868789	36868843	6474	2,8,6	3,0,2	2,1,11	1,0,0	313	149	1.3184e-12	3.45223e-11	0.241,1.0,0.588	0.488,1.0,1.0	-0.22
1422	320816	Ankrd16	NC_000068.8	+	11786287	11786344	11786287	11786330	11788451	11788567	1422	0,2,4	9,4,6	2,0,0	2,5,10	163	149	1.48011e-12	3.85338e-11	0.0,0.314,0.379	0.478,0.0,0.0	0.072
2765	22612	Yes1	NC_000071.7	+	32768514	32769181	32768514	32768719	32797674	32797947	2765	93112130	12,35,39	77,70,81	30,28,33	611	149	1.84531e-12	4.77672e-11	0.654,0.438,0.448	0.385,0.379,0.374	0.134
5632	109275	Actr5	NC_000068.8	+	158473390	158473604	158473390	158473600	158474191	158474374	5632	0,0,1	11,11,18	1,2,4	13,5,4	153	149	2.53299e-12	6.51958e-11	0.0,0.0,0.051	0.07,0.28,0.493	-0.264
5588	21677	Tead2	NC_000073.7	+	44865215	44865690	44865215	44865256	44866636	44866874	5588	3,13,2	0,4,0	6,1,1	3,5,1	583	149	2.9484e-12	7.5459e-11	1.0,0.454,1.0	0.338,0.049,0.204	0.621
8134	56381	Spen	NC_000070.7	-	141248169	141249703	141249382	141249703	141244146	141244629	8134	312252285	28,58,19	175144190	24,42,30	1362	149	3.70973e-12	9.44104e-11	0.549,0.322,0.621	0.444,0.273,0.409	0.122
3056	20719	Serpinb6a	NC_000079.7	-	34119609	34119777	34119749	34119777	34115454	34115629	3056	26,24,18	5,3,1	18,18,21	5,4,17	289	149	7.79018e-12	1.97148e-10	0.728,0.805,0.903	0.65,0.699,0.389	0.233
6898	77805	Esco1	NC_000084.7	-	10587365	10588550	10588438	10588550	10585977	10586041	6898	69,40,38	20,7,23	35,34,28	21,12,28	1222	149	1.56444e-11	3.93716e-10	0.296,0.411,0.168	0.169,0.257,0.109	0.113
4598	66231	Thoc7	NC_000080.7	+	8512131	8512283	8512131	8512209	8515106	8515224	4598	2,2,8	0,1,6	8,0,5	2,0,2	223	149	1.88112e-11	4.70801e-10	1.0,0.572,0.471	0.728,NA,0.626	0.004
830	215113	Slc43a2	NC_000077.7	+	75421943	75422648	75421943	75422567	75423413	75423614	830	0,0,0	2,4,0	7,3,7	0,0,0	230	149	1.91475e-11	4.76582e-10	0.0,0.0,NA	1.0,1.0,1.0	-1
1370	13198	Ddit3	NC_000076.7	+	127126661	127126867	127126661	127126760	127129580	127129628	1370	2,16,1	13,40,25	16,11,24	20,41,44	256	149	3.40008e-11	8.41658e-10	0.082,0.189,0.023	0.318,0.135,0.241	-0.133
3162	226562	Prrc2c	NC_000067.7	-	162548998	162549108	162549013	162549108	162548049	162548175	3162	23,79,71	8,17,10	56,48,56	22,20,16	164	149	4.30237e-11	1.05922e-09	0.723,0.809,0.866	0.698,0.686,0.761	0.084
3262	214597	Sidt2	NC_000075.7	-	45858838	45859186	45858926	45859186	45858281	45858353	3262	13,10,6	10,7,4	23,13,15	1,3,11	237	149	5.37126e-11	1.31523e-09	0.45,0.473,0.485	0.935,0.731,0.462	-0.24
7234	623661	Lipt1	NC_000067.7	+	37911430	37911931	37911430	37911669	37913944	37915309	7234	12,9,11	0,2,0	13,11,12	6,2,3	411	149	5.99834e-11	1.46089e-09	1.0,0.62,1.0	0.44,0.666,0.592	0.307
3309	272322	Arntl2	NC_000072.7	+	146729596	146729781	146729596	146729684	146731190	146731299	3309	3,4,0	0,2,1	5,1,1	1,3,3	246	149	1.0767e-10	2.60826e-09	1.0,0.548,0.0	0.752,0.168,0.168	0.153
829	215113	Slc43a2	NC_000077.7	+	75421943	75423034	75421943	75422648	75423413	75423614	829	4,6,17	0,0,0	5,16,16	7,0,7	535	149	1.6878e-10	4.06689e-09	1.0,1.0,1.0	0.166,1.0,0.389	0.482
1246	29808	Mga	NC_000068.8	+	119781566	119782445	119781566	119781694	119783355	119783407	1246	88,58,77	41,56,57	60,38,46	62,62,57	900	149	1.89176e-10	4.53421e-09	0.262,0.146,0.183	0.138,0.092,0.118	0.081
5879	101604	E430018J23Rik	NC_000073.7	-	126992379	126992834	126992461	126992834	126992172	126992286	5879	9,12,11	2,1,5	6,7,2	0,2,0	231	149	1.91857e-10	4.57427e-09	0.744,0.886,0.587	1.0,0.693,1.0	-0.159
1341	65111	Dap3	NC_000069.7	-	88858175	88858488	88858267	88858488	88850081	88850135	1341	0,2,0	2,0,1	8,0,6	0,0,0	241	149	3.1411e-10	7.44984e-09	0.0,1.0,0.0	1.0,NA,1.0	-0.667
848	20360	Sema6c	NC_000069.7	+	95074316	95074531	95074316	95074431	95074723	95074787	848	0,2,3	0,3,2	2,1,2	11,3,7	249	149	3.54807e-10	8.37123e-09	NA,0.285,0.473	0.098,0.166,0.146	0.242
2368	20148	Dhrs3	NC_000070.7	+	144618711	144619945	144618711	144619480	144620154	144620279	2368	117453421	8,8,12	454511548	7,2,3	614	149	4.30359e-10	1.01012e-08	0.78,0.932,0.895	0.94,0.984,0.978	-0.098
6325	192197	Bcas3	NC_000077.7	+	85245419	85245505	85245419	85245487	85245713	85245801	6325	0,0,5	7,12,15	6,0,9	16,15,10	167	149	4.82799e-10	1.12736e-08	0.0,0.0,0.229	0.251,0.0,0.445	-0.156
2021	74022	Glyr1	NC_000082.7	-	4867249	4867774	4867669	4867774	4866613	4866650	2021	21,38,40	8,70,38	39,23,30	75,60,68	569	149	5.00845e-10	1.1635e-08	0.407,0.124,0.216	0.12,0.091,0.104	0.144
764	234825	Klhdc4	NC_000074.7	-	122548013	122548097	122548041	122548097	122546860	122546959	764	14,15,20	0,8,6	23,22,19	2,0,2	177	149	5.93468e-10	1.37164e-08	1.0,0.612,0.737	0.906,1.0,0.889	-0.149
1168	26951	Zw10	NC_000075.7	+	48972354	48972530	48972354	48972514	48973492	48973645	1168	3,3,3	16,12,13	2,1,1	29,17,16	165	149	6.91701e-10	1.59056e-08	0.145,0.184,0.172	0.059,0.05,0.053	0.113
824	215113	Slc43a2	NC_000077.7	+	75421943	75423240	75421943	75422648	75423413	75423614	824	9,17,22	0,0,0	14,33,19	7,0,7	741	149	8.42869e-10	1.92838e-08	1.0,1.0,1.0	0.287,1.0,0.353	0.453
5886	232816	Zfp628	NC_000073.7	+	4920408	4920532	4920408	4920515	4921774	4925002	5886	2,1,3	13,1,4	2,1,0	12,6,12	166	149	8.83741e-10	2.01173e-08	0.121,0.473,0.402	0.13,0.13,0.0	0.245
5205	373864	Col27a1	NC_000070.7	+	63176388	63176433	63176388	63176425	63181955	63182009	5205	3,0,0	0,8,3	1,2,7	0,0,0	157	149	9.04629e-10	2.04898e-08	1.0,0.0,0.0	1.0,1.0,1.0	-0.667
4246	73229	Zfp983	NC_000083.7	+	21870722	21870865	21870722	21870818	21871186	21871265	4246	11,4,0	0,0,0	2,0,1	5,3,0	196	149	9.98423e-10	2.25018e-08	1.0,1.0,NA	0.233,0.0,1.0	0.589
4979	268515	Bahcc1	NC_000077.7	+	120127040	120127573	120127040	120127470	120127685	120128083	4979	0,0,0	0,4,4	2,1,2	1,0,0	252	149	1.49867e-09	3.36089e-08	NA,0.0,0.0	0.542,1.0,1.0	-0.847
2532	67046	Tbc1d7	NC_000079.7	-	43306545	43306675	43306659	43306675	43305215	43305456	2532	85,54,59	8,5,1	42,81,80	4,9,16	263	149	1.68632e-09	3.76307e-08	0.858,0.86,0.971	0.856,0.836,0.739	0.086
8185	108829	Jmjd1c	NC_000076.7	+	66997466	67022090	66997466	67022085	67025514	67025628	8185	30,20,15	10,0,6	32,20,36	4,1,4	154	149	1.81618e-09	4.03298e-08	0.744,1.0,0.708	0.886,0.951,0.897	-0.094
8091	71268	Lrrfip2	NC_000075.7	+	111011886	111011964	111011886	111011955	111013257	111013347	8091	23,25,27	155114124	20,33,35	77,93,96	158	149	2.22733e-09	4.92186e-08	0.123,0.171,0.17	0.197,0.251,0.256	-0.08
750	18746	Pkm	NC_000075.7	+	59566868	59570439	59566868	59568754	59572482	59572649	750	180198186	1,1,2	268308300	6,15,5	1834	149	2.45644e-09	5.40178e-08	0.936,0.941,0.883	0.784,0.625,0.83	0.174
2112	234373	Sugp2	NC_000074.7	+	70713118	70713967	70713118	70713239	70715520	70715755	2112	127,62,77	31,23,8	55,44,50	19,14,22	877	149	2.47584e-09	5.41814e-08	0.41,0.314,0.621	0.33,0.348,0.279	0.129
8277	67260	Cers4	NC_000074.7	+	4571173	4571417	4571173	4571280	4573353	4573510	8277	37,5,9	34,26,36	12,1,10	27,30,47	286	149	2.51419e-09	5.47562e-08	0.362,0.091,0.115	0.188,0.017,0.1	0.088
451	20520	Slc22a5	NC_000077.7	-	53766815	53766989	53766834	53766989	53765760	53765932	451	18,5,0	40,11,12	7,0,1	28,25,32	168	149	2.7978e-09	6.06414e-08	0.285,0.287,0.0	0.181,0.0,0.027	0.121
7193	71371	Arid5b	NC_000076.7	-	68112581	68114014	68113759	68114014	68078833	68079059	7193	7,15,25	12,22,14	11,8,8	3,1,5	1327	149	2.95941e-09	6.38387e-08	0.061,0.071,0.167	0.292,0.473,0.152	-0.206
7615	20338	Sel1l	NC_000078.7	-	91799828	91799996	91799978	91799996	91798342	91798448	7615	92129126	5,23,18	135144141	11,8,10	299	149	4.29356e-09	9.17445e-08	0.902,0.736,0.777	0.859,0.9,0.875	-0.073
8087	54614	Prpf40b	NC_000081.7	+	99199667	99199879	99199667	99199865	99201163	99201244	8087	1,0,2	3,5,3	0,1,2	0,0,0	163	149	4.28229e-09	9.17445e-08	0.234,0.0,0.379	NA,1.0,1.0	-0.796
904	69714	Tfpt	NC_000073.7	-	3623745	3623982	3623775	3623982	3623322	3623473	904	3,5,13	31,40,37	18,16,23	31,43,32	179	149	4.63543e-09	9.85844e-08	0.075,0.094,0.226	0.326,0.236,0.374	-0.18
5137	12421	Rb1cc1	NC_000067.7	+	6293822	6293969	6293822	6293926	6298163	6298273	5137	3,2,3	4,0,0	0,0,1	1,2,0	192	149	4.75167e-09	1.00584e-07	0.368,1.0,1.0	0.0,0.0,1.0	0.456
5392	545389	Cep170	NC_000067.7	-	176570066	176570214	176570117	176570214	176567484	176567655	5392	11,19,22	5,6,2	16,23,16	3,4,0	200	149	5.17424e-09	1.0902e-07	0.621,0.702,0.891	0.799,0.811,1.0	-0.132
1709	66869	Zfp869	NC_000074.7	-	70168933	70169552	70169417	70169552	70163335	70163634	1709	27,42,44	0,15,11	20,29,26	10,8,10	633	149	5.5258e-09	1.15888e-07	1.0,0.397,0.485	0.32,0.46,0.38	0.241
7671	93742	Pard3	NC_000074.7	+	128125080	128125240	128125080	128125231	128126878	128129063	7671	2,9,7	3,0,7	5,0,3	7,3,0	158	149	5.8402e-09	1.21917e-07	0.386,1.0,0.485	0.402,0.0,1.0	0.156
90	66124	Josd2	NC_000073.7	+	44117403	44117614	44117403	44117583	44118230	44118393	90	80,110,99	0,4,0	161148158	24,1,12	180	149	6.21696e-09	1.29187e-07	1.0,0.958,1.0	0.847,0.992,0.916	0.068
4789	327762	Dna2	NC_000076.7	+	62805554	62805840	62805554	62805737	62807622	62807769	4789	2,3,0	0,0,0	0,0,1	1,1,2	252	149	6.59093e-09	1.36333e-07	1.0,1.0,NA	0.0,0.0,0.228	0.924
6322	66258	Mrps17	NC_000071.7	+	129792747	129793675	129792747	129792974	129793790	129793930	6322	141,72,77	13,15,11	72,63,68	10,19,15	850	149	7.42533e-09	1.52894e-07	0.655,0.457,0.551	0.558,0.368,0.443	0.098
6147	66921	Prpf38b	NC_000069.7	-	108813387	108815163	108815102	108815163	108812426	108812650	6147	300208240	22,30,23	166143151	30,32,35	1864	149	7.48949e-09	1.53518e-07	0.522,0.357,0.455	0.307,0.263,0.256	0.169
1827	13854	Epn1	NC_000073.7	+	5083224	5083637	5083224	5083476	5092917	5093167	1827	41,53,31	31,12,8	25,29,25	20,16,15	310	149	7.92926e-09	1.618e-07	0.389,0.68,0.651	0.375,0.466,0.445	0.145
260	69232	Qrich1	NC_000075.7	+	108394009	108395175	108394009	108394451	108405787	108406117	260	45,48,28	2,12,0	66,61,49	0,10,0	873	149	8.15134e-09	1.65585e-07	0.793,0.406,1.0	1.0,0.51,1.0	-0.104
1103	59026	Huwe1	NC_000086.8	+	150586751	150587536	150586751	150586798	150589271	150589403	1103	53,88,87	0,1,0	68,58,79	8,6,7	887	149	9.72037e-09	1.96577e-07	1.0,0.937,1.0	0.588,0.619,0.655	0.358
849	20360	Sema6c	NC_000069.7	+	95074316	95074584	95074316	95074431	95074723	95074787	849	0,2,3	0,3,2	1,1,2	11,3,7	302	149	1.23263e-08	2.4817e-07	NA,0.248,0.425	0.043,0.141,0.124	0.234
2705	77613	Prss36	NC_000073.7	-	127534618	127535175	127534673	127535175	127533681	127533799	2705	20,10,12	13,12,10	6,12,7	5,1,5	204	149	1.29725e-08	2.60024e-07	0.529,0.378,0.467	0.467,0.898,0.506	-0.166
5772	14184	Fgfr3	NC_000071.7	+	33879067	33879298	33879067	33879272	33879649	33879855	5772	8,3,3	26,14,2	4,10,11	8,12,6	175	149	1.41316e-08	2.82009e-07	0.208,0.154,0.561	0.299,0.415,0.61	-0.134
2277	21778	Tex9	NC_000075.7	-	72387205	72388057	72387878	72388057	72385621	72385704	2277	2,16,25	0,0,0	10,5,2	3,2,2	822	149	1.61613e-08	3.211e-07	1.0,1.0,1.0	0.377,0.312,0.153	0.719
5978	27632	Nelfe	NC_000083.7	+	35069366	35069650	35069366	35069564	35069886	35069969	5978	7,2,3	0,2,0	2,0,3	6,1,0	235	149	1.89586e-08	3.75032e-07	1.0,0.388,1.0	0.174,0.0,1.0	0.405
1752	277414	Trp53i11	NC_000068.8	+	93026864	93027050	93026864	93027042	93027241	93027323	1752	1,2,2	0,0,3	0,1,0	4,0,3	157	149	1.98705e-08	3.91362e-07	1.0,1.0,0.388	0.0,1.0,0.0	0.463
4468	211401	Mtss1	NC_000081.7	-	58817165	58817373	58817210	58817373	58813082	58815979	4468	15,31,22	20,51,54	15,8,7	42,23,27	194	149	2.04734e-08	4.01492e-07	0.365,0.318,0.238	0.215,0.211,0.166	0.11
8156	23939	Mapk7	NC_000077.7	-	61384349	61384780	61384472	61384780	61383729	61383895	8156	5,8,7	3,4,7	3,5,2	3,5,6	272	149	2.10583e-08	4.11182e-07	0.477,0.523,0.354	0.354,0.354,0.154	0.164
6749	66932	Rexo1	NC_000076.7	-	80384898	80386899	80385166	80386899	80384265	80384367	6749	17,10,25	22,19,15	14,6,15	30,21,19	417	149	2.81877e-08	5.48026e-07	0.216,0.158,0.373	0.143,0.093,0.22	0.097
1699	68839	Ankrd46	NC_000081.7	-	36496485	36496880	36496569	36496880	36496022	36496139	1699	3,3,1	0,1,1	1,1,1	0,4,3	233	149	2.9868e-08	5.78214e-07	1.0,0.657,0.39	1.0,0.138,0.176	0.244
6652	18861	Pms2	NC_000071.7	+	143864916	143865115	143864916	143865084	143865759	143865860	6652	7,0,2	25,12,9	1,7,2	6,9,5	180	149	3.28958e-08	6.34118e-07	0.188,0.0,0.155	0.121,0.392,0.249	-0.14
6640	329470	Accs	NC_000068.8	-	93679294	93680339	93679889	93680339	93678261	93678552	6640	8,19,8	6,0,4	9,10,21	0,0,0	744	149	3.56354e-08	6.84019e-07	0.211,1.0,0.286	1.0,1.0,1.0	-0.501
5072	70225	Ppil3	NC_000067.7	-	58483969	58484645	58484490	58484645	58483747	58483798	5072	17,22,17	3,4,2	22,37,29	1,2,2	670	149	3.74631e-08	7.16067e-07	0.558,0.55,0.654	0.83,0.804,0.763	-0.212
6317	66258	Mrps17	NC_000071.7	+	129792747	129793025	129792747	129792974	129793790	129793930	6317	11,17,8	13,15,11	7,6,10	10,19,15	200	149	3.76488e-08	7.16592e-07	0.387,0.458,0.351	0.343,0.19,0.332	0.11
3505	109151	Chd9	NC_000074.7	+	91662273	91682862	91662273	91681957	91683010	91683342	3505	41,52,49	8,8,1	37,50,88	6,5,0	1054	149	4.16649e-08	7.89715e-07	0.42,0.479,0.874	0.466,0.586,1.0	-0.093
4119	18771	Pknox1	NC_000083.7	+	31800777	31801016	31800777	31800900	31802669	31802777	4119	0,0,4	9,0,0	2,4,1	0,0,0	265	149	5.09004e-08	9.60745e-07	0.0,NA,1.0	1.0,1.0,1.0	-0.5
3540	13209	Ddx6	NC_000075.7	+	44516188	44516533	44516188	44516249	44518419	44518889	3540	3,17,17	23,31,43	23,12,13	0,38,36	433	149	5.73769e-08	1.0785e-06	0.043,0.159,0.12	1.0,0.098,0.111	-0.296
6812	66743	Rnf220	NC_000070.7	-	117145512	117146265	117145559	117146265	117143125	117143169	6812	1,0,3	5,2,1	1,4,7	3,2,1	196	149	5.85936e-08	1.09681e-06	0.132,0.0,0.695	0.202,0.603,0.842	-0.273
5151	27054	Sec23b	NC_000068.8	+	144398148	144398567	144398148	144398244	144401126	144401361	5151	4,4,0	10,8,0	5,2,2	0,0,0	472	149	6.06783e-08	1.13116e-06	0.112,0.136,NA	1.0,1.0,1.0	-0.876
2527	210992	Lpcat1	NC_000079.7	+	73649474	73649728	73649474	73649509	73651159	73651214	2527	5,7,5	18,7,5	8,1,0	20,8,10	368	149	6.71137e-08	1.246e-06	0.101,0.288,0.288	0.139,0.048,0.0	0.163
2158	69499	Tsr2	NC_000086.8	-	149873591	149873777	149873600	149873777	149870089	149873410	2158	15,1,16	16,17,38	5,3,3	20,19,21	158	149	7.25446e-08	1.33882e-06	0.469,0.053,0.284	0.191,0.13,0.119	0.122
5825	108154	Adamts6	NC_000079.7	+	104423025	104424621	104423025	104424172	104430954	104431332	5825	27,23,28	36,0,0	19,20,12	0,2,0	598	149	7.2704e-08	1.33882e-06	0.157,1.0,1.0	1.0,0.714,1.0	-0.186
7612	69536	Hemk1	NC_000075.7	-	107215479	107215734	107215572	107215734	107214199	107214577	7612	12,14,9	3,3,4	15,24,13	2,2,3	242	149	8.46335e-08	1.55218e-06	0.711,0.742,0.581	0.822,0.881,0.727	-0.132
1968	72621	Pdzd11	NC_000086.8	-	99669421	99669547	99669491	99669547	99668893	99668993	1968	7,23,16	0,14,15	31,19,22	11,10,11	219	149	9.62823e-08	1.7587e-06	1.0,0.528,0.421	0.657,0.564,0.576	0.051
8246	69085	Zcchc9	NC_000079.7	-	91953855	91954279	91953869	91954279	91948984	91949135	8246	4,4,2	15,21,11	0,0,2	22,17,18	163	149	1.07723e-07	1.95977e-06	0.196,0.148,0.143	0.0,0.0,0.092	0.132
3063	20719	Serpinb6a	NC_000079.7	-	34119601	34119777	34119749	34119777	34115454	34115629	3063	32,30,18	5,3,1	28,25,25	5,4,17	297	149	1.12386e-07	2.03644e-06	0.763,0.834,0.9	0.737,0.758,0.425	0.192
6912	12877	Cpeb1	NC_000073.7	-	81006641	81006746	81006656	81006746	81005622	81005759	6912	13,6,0	38,14,12	0,0,7	13,14,23	164	149	1.18298e-07	2.13502e-06	0.237,0.28,0.0	0.0,0.0,0.217	0.1
1388	100732	Mapre3	NC_000071.7	+	31020547	31020749	31020547	31020704	31021917	31022072	1388	72,80,99	27,37,45	152,91,133	30,30,48	194	149	1.27492e-07	2.29183e-06	0.672,0.624,0.628	0.796,0.7,0.68	-0.084
1092	54169	Kat6b	NC_000080.7	+	21674900	21675418	21674900	21674956	21676786	21676908	1092	32,91,83	9,26,24	74,36,95	3,9,1	611	149	1.33346e-07	2.38758e-06	0.464,0.46,0.458	0.857,0.494,0.959	-0.309
69	66830	Nacc1	NC_000074.7	-	85402969	85403881	85403050	85403881	85402713	85402887	69	73,59,63	4,9,5	73,60,75	21,10,14	230	149	1.65479e-07	2.95127e-06	0.922,0.809,0.891	0.692,0.795,0.776	0.12
8222	229503	Rrnad1	NC_000069.7	-	87832198	87832738	87832253	87832738	87831650	87831835	8222	21,6,7	2,0,5	7,8,6	4,1,6	204	149	1.78089e-07	3.1637e-06	0.885,1.0,0.506	0.561,0.854,0.422	0.185
5547	74766	Yipf2	NC_000075.7	-	21503823	21504127	21504022	21504127	21503356	21503514	5547	18,32,19	0,1,0	26,17,33	1,3,3	348	149	1.96242e-07	3.47246e-06	1.0,0.932,1.0	0.918,0.708,0.825	0.16
7442	19299	Abcd3	NC_000069.7	-	121579650	121581698	121581628	121581698	121578121	121578219	7442	260291376	50,48,46	375372415	135151144	2127	149	1.97003e-07	3.47246e-06	0.267,0.298,0.364	0.163,0.147,0.168	0.15
3134	84585	Rnf123	NC_000075.7	-	107955998	107956706	107956467	107956706	107954920	107955096	3134	39,42,42	23,40,33	35,33,33	78,52,84	618	149	2.01955e-07	3.54596e-06	0.29,0.202,0.235	0.098,0.133,0.087	0.136
3985	67290	3110040N11Rik	NC_000073.7	-	81438999	81439203	81439102	81439203	81438197	81438324	3985	13,52,25	9,17,19	25,51,48	8,16,7	252	149	2.13465e-07	3.71965e-06	0.461,0.644,0.438	0.649,0.653,0.802	-0.187
4337	226610	Fam78b	NC_000067.7	+	166906105	166907036	166906105	166907034	166915546	166918871	4337	0,0,2	0,3,0	0,1,2	0,1,4	151	149	2.1349e-07	3.71965e-06	NA,0.0,1.0	NA,0.497,0.33	0.087
3486	327655	Ppip5k1	NC_000068.8	-	121153218	121153857	121153674	121153857	121152135	121152273	3486	12,44,28	9,10,11	17,33,30	16,15,32	605	149	2.15721e-07	3.74412e-06	0.247,0.52,0.385	0.207,0.351,0.188	0.135
3060	20719	Serpinb6a	NC_000079.7	-	34119551	34119777	34119555	34119777	34115454	34115629	3060	30,43,35	57,33,31	37,27,35	33,17,16	153	149	2.80345e-07	4.84719e-06	0.339,0.559,0.524	0.522,0.607,0.681	-0.129
3701	67959	Puf60	NC_000081.7	-	75951075	75951338	75951218	75951338	75949449	75949551	3701	9,2,3	0,0,2	0,0,5	0,4,0	292	149	2.8623e-07	4.93012e-06	1.0,1.0,0.434	NA,0.0,1.0	0.311
206	12704	Cit	NC_000071.7	+	116063452	116064382	116063452	116063558	116064517	116064661	206	24,3,3	2,2,0	0,0,3	1,8,1	973	149	2.96747e-07	5.09191e-06	0.648,0.187,1.0	0.0,0.0,0.315	0.507
3176	14166	Fgf11	NC_000077.7	-	69690467	69690602	69690491	69690602	69690177	69690281	3176	0,3,0	15,9,5	0,1,1	1,0,0	173	149	3.15559e-07	5.39428e-06	0.0,0.223,0.0	0.0,1.0,1.0	-0.592
5102	59030	Mkks	NC_000068.8	-	136732962	136733326	136733198	136733326	136727392	136727620	5102	121170124	13,38,60	153152213	35,19,25	385	149	3.68395e-07	6.2738e-06	0.783,0.634,0.444	0.629,0.756,0.767	-0.097
3702	16593	Klc1	NC_000078.7	+	111755758	111755920	111755758	111755893	111761981	111762112	3702	47,42,49	32,17,12	48,59,55	5,1,12	176	149	3.73439e-07	6.33588e-06	0.554,0.677,0.776	0.89,0.98,0.795	-0.219
5041	338354	Zfp780b	NC_000073.7	-	27676164	27676258	27676176	27676258	27674177	27674230	5041	18,6,15	8,6,7	6,4,5	0,13,8	161	149	3.94584e-07	6.66965e-06	0.676,0.481,0.665	1.0,0.222,0.366	0.078
4117	18771	Pknox1	NC_000083.7	+	31800777	31801024	31800777	31800900	31802669	31802777	4117	0,0,7	9,0,0	2,4,6	0,0,0	273	149	4.02148e-07	6.77223e-06	0.0,NA,1.0	1.0,1.0,1.0	-0.5
6845	11797	Birc2	NC_000075.7	-	7836226	7837121	7836990	7837121	7833505	7835380	6845	61,75,62	21,31,24	64,48,38	36,40,38	913	149	4.36552e-07	7.32437e-06	0.322,0.283,0.297	0.225,0.164,0.14	0.124
162	19652	Rbm3	NC_000086.8	-	8009485	8009571	8009489	8009571	8008594	8009194	162	69,68,66	174143139	36,37,41	169104112	153	149	4.78258e-07	7.9945e-06	0.279,0.317,0.316	0.172,0.257,0.263	0.073
2991	21815	Tgif1	NC_000083.7	-	71156629	71156799	71156641	71156799	71153166	71153393	2991	0,0,2	0,1,1	1,1,2	0,0,2	161	149	5.30069e-07	8.82799e-06	NA,0.0,0.649	1.0,1.0,0.481	-0.502
1693	56515	Rnf138	NC_000084.7	+	21157465	21158572	21157465	21157573	21159142	21161281	1693	30,25,14	5,2,9	16,14,12	5,5,8	1148	149	5.58752e-07	9.27159e-06	0.438,0.619,0.168	0.293,0.267,0.163	0.167
3965	17765	Mtf2	NC_000071.7	+	108217027	108217389	108217027	108217229	108228690	108228889	3965	5,7,14	8,3,15	4,10,7	3,0,6	309	149	6.05571e-07	1.00118e-05	0.232,0.529,0.31	0.391,1.0,0.36	-0.227
5074	70225	Ppil3	NC_000067.7	-	58484304	58484645	58484490	58484645	58483747	58483798	5074	22,46,21	3,4,2	45,35,44	1,2,2	335	149	6.62937e-07	1.09204e-05	0.765,0.836,0.824	0.952,0.886,0.907	-0.107
1935	68644	Abhd14a	NC_000075.7	-	106321004	106321141	106321025	106321141	106317819	106318109	1935	0,0,2	5,1,0	1,3,1	0,0,0	170	149	6.69598e-07	1.09901e-05	0.0,0.0,1.0	1.0,1.0,1.0	-0.667
7083	18130	Ints6	NC_000080.7	-	62938079	62938311	62938109	62938311	62934041	62934404	7083	15,29,25	16,24,25	27,26,31	1,23,18	179	149	7.03028e-07	1.14972e-05	0.438,0.501,0.454	0.957,0.485,0.589	-0.213
5255	57754	Cend1	NC_000073.7	-	141009187	141009475	141009229	141009475	141006358	141007916	5255	0,4,4	0,1,0	2,0,0	4,0,5	191	149	7.23056e-07	1.17822e-05	NA,0.757,1.0	0.281,NA,0.0	0.738
1181	27083	Xlr4b	NC_000086.8	+	72257938	72258087	72257938	72258063	72258379	72258426	1181	0,0,0	0,1,3	0,2,3	0,0,1	173	149	8.79173e-07	1.42747e-05	NA,0.0,0.0	NA,1.0,0.721	-0.861
8178	208943	Myo5c	NC_000075.7	+	75211211	75211408	75211211	75211381	75212465	75212733	8178	1,3,3	1,3,3	1,0,1	0,1,0	176	149	8.8624e-07	1.43381e-05	0.458,0.458,0.458	1.0,0.0,1.0	-0.209
8021	239559	A4galt	NC_000081.7	-	83135817	83135930	83135900	83135930	83114714	83114858	8021	6,0,3	6,0,2	2,7,12	0,0,0	232	149	9.2738e-07	1.49503e-05	0.391,NA,0.491	1.0,1.0,1.0	-0.559
7707	30957	Mapk8ip3	NC_000083.7	-	25125120	25125202	25125147	25125202	25124141	25124272	7707	62,77,62	75,49,37	82,57,78	26,42,36	176	149	1.01695e-06	1.63361e-05	0.412,0.571,0.587	0.728,0.535,0.647	-0.113
5537	54214	Golga4	NC_000075.7	+	118405290	118405577	118405290	118405424	118406209	118406296	5537	21,24,29	0,0,0	24,12,27	4,6,5	302	149	1.13239e-06	1.81263e-05	1.0,1.0,1.0	0.747,0.497,0.727	0.343
3125	234814	Mthfsd	NC_000074.7	-	121834729	121835146	121834932	121835146	121833608	121833712	3125	0,11,6	2,4,7	10,2,7	4,2,2	352	149	1.17597e-06	1.87576e-05	0.0,0.538,0.266	0.514,0.297,0.597	-0.201
2567	319945	Flad1	NC_000069.7	-	89319052	89319188	89319090	89319188	89315728	89316473	2567	0,3,3	0,0,0	1,0,0	1,0,5	187	149	1.29633e-06	2.06048e-05	NA,1.0,1.0	0.443,NA,0.0	0.778
4978	268515	Bahcc1	NC_000077.7	+	120127040	120127522	120127040	120127470	120127685	120128083	4978	0,0,7	0,4,4	1,1,2	1,0,0	201	149	1.38828e-06	2.19892e-05	NA,0.0,0.565	0.426,1.0,1.0	-0.526
1994	12339	Capn7	NC_000080.7	+	31082081	31083202	31082081	31082202	31085435	31085580	1994	201130151	23,80,69	113,94,128	83,64,81	1149	149	1.3996e-06	2.20913e-05	0.531,0.174,0.221	0.15,0.16,0.17	0.149
1293	231506	Lin54	NC_000071.7	-	100632998	100633714	100633661	100633714	100628056	100628180	1293	54,54,81	5,9,15	60,52,76	2,1,6	812	149	1.55673e-06	2.4486e-05	0.665,0.524,0.498	0.846,0.905,0.699	-0.254
82	68055	Dmac2l	NC_000078.7	+	69771718	69772328	69771718	69771788	69787672	69787881	82	53,54,54	1,5,3	56,66,83	1,2,2	689	149	1.68087e-06	2.63472e-05	0.92,0.7,0.796	0.924,0.877,0.9	-0.095
6876	83671	Sytl2	NC_000073.7	+	90028709	90032390	90028709	90028781	90034250	90034352	6876	6,7,14	1,0,2	0,1,0	0,2,0	3758	149	1.87147e-06	2.92337e-05	0.192,1.0,0.217	NA,0.019,NA	0.451
3347	77574	Tcaf1	NC_000072.7	-	42650286	42650572	42650312	42650572	42644935	42647257	3347	7,8,9	6,11,8	4,4,13	1,0,5	175	149	2.06688e-06	3.21751e-05	0.498,0.382,0.489	0.773,1.0,0.689	-0.364
144	233979	Tpcn2	NC_000073.7	-	144809048	144809270	144809187	144809270	144807659	144808435	144	1,0,1	5,6,0	2,1,3	3,5,5	288	149	2.11611e-06	3.28287e-05	0.094,0.0,1.0	0.256,0.094,0.237	0.169
8015	16404	Itga7	NC_000076.7	+	128777313	128777810	128777313	128777445	128778676	128778884	8015	146141161	3,23,18	194203207	22,34,33	514	149	2.14451e-06	3.31557e-05	0.934,0.64,0.722	0.719,0.634,0.645	0.099
8170	231086	Hadhb	NC_000071.7	+	30360250	30360380	30360250	30360337	30368666	30368741	8170	279342485	269529600	663620739	707529646	192	149	2.36846e-06	3.64937e-05	0.446,0.334,0.385	0.421,0.476,0.47	-0.067
1277	16970	Lrmp	NC_000072.7	+	145083185	145083812	145083185	145083333	145083907	145083989	1277	5,2,0	0,0,2	8,1,5	3,1,1	628	149	2.42616e-06	3.72559e-05	1.0,1.0,0.0	0.388,0.192,0.543	0.292
2090	56807	Scamp5	NC_000075.7	-	57375098	57375343	57375215	57375343	57359262	57359317	2090	0,5,2	4,13,12	10,13,9	15,14,18	266	149	2.49544e-06	3.81904e-05	0.0,0.177,0.085	0.272,0.342,0.219	-0.19
7894	66211	Rpl3l	NC_000083.7	+	24946951	24947196	24946951	24947192	24947290	24947483	7894	0,5,0	1,4,5	7,5,3	9,5,5	153	149	2.58649e-06	3.94505e-05	0.0,0.549,0.0	0.431,0.493,0.369	-0.248
2165	21841	Tia1	NC_000072.7	+	86401943	86402185	86401943	86402052	86402431	86402527	2165	16,34,26	35,24,19	16,14,18	23,25,30	282	149	2.62794e-06	3.99157e-05	0.195,0.428,0.42	0.269,0.228,0.241	0.102
4755	227700	Sh3glb2	NC_000068.8	-	30236318	30236465	30236364	30236465	30234820	30235439	4755	0,1,0	4,0,0	3,0,1	0,0,0	195	149	2.63461e-06	3.99157e-05	0.0,1.0,NA	1.0,NA,1.0	-0.5
6874	83671	Sytl2	NC_000073.7	+	90028709	90031655	90028709	90028781	90034250	90034352	6874	4,6,11	1,0,2	0,1,0	0,2,0	3023	149	3.00696e-06	4.54051e-05	0.165,1.0,0.213	NA,0.024,NA	0.435
3534	13209	Ddx6	NC_000075.7	+	44516188	44516533	44516188	44516445	44518419	44518889	3534	1,7,5	0,4,2	3,4,6	3,0,0	237	149	3.08032e-06	4.62873e-05	1.0,0.524,0.611	0.386,1.0,1.0	-0.084
3966	17765	Mtf2	NC_000071.7	+	108217027	108221320	108217027	108217229	108228690	108228889	3966	293216313	8,3,15	148177143	3,0,6	4240	149	3.08582e-06	4.62873e-05	0.563,0.717,0.423	0.634,1.0,0.456	-0.129
6521	24127	Xrn1	NC_000075.7	+	95921752	95921909	95921752	95921897	95927538	95927714	6521	17,10,3	36,29,28	3,11,15	17,13,18	161	149	3.4545e-06	5.16465e-05	0.304,0.242,0.09	0.14,0.439,0.435	-0.126
6877	83671	Sytl2	NC_000073.7	+	90028709	90031292	90028709	90028781	90034250	90034352	6877	2,4,10	1,0,2	0,1,0	0,2,0	2660	149	4.14796e-06	6.18101e-05	0.101,1.0,0.219	NA,0.027,NA	0.413
1049	382686	3110053B16Rik	NC_000078.7	-	20926493	20927096	20926698	20927096	20923379	20924220	1049	7,6,5	1,0,0	0,0,0	0,2,0	354	149	4.20314e-06	6.2427e-05	0.747,1.0,1.0	NA,0.0,NA	0.916
4943	30960	Vapa	NC_000083.7	-	65894038	65894161	65894047	65894161	65889574	65889748	4943	0,4,11	0,2,8	1,1,1	2,1,2	158	149	4.70516e-06	6.96548e-05	NA,0.654,0.565	0.32,0.485,0.32	0.234
1650	105827	Amigo2	NC_000081.7	-	97144821	97145168	97144853	97145168	97141954	97144478	1650	5,5,0	8,1,0	0,0,2	2,1,4	181	149	4.75806e-06	7.02085e-05	0.34,0.805,NA	0.0,0.0,0.292	0.475
5793	70552	Lrrc56	NC_000073.7	+	140774025	140775129	140774025	140774811	140775820	140775891	5793	0,1,2	6,1,2	2,2,2	0,1,0	467	149	5.03057e-06	7.39886e-05	0.0,0.242,0.242	1.0,0.39,1.0	-0.635
4044	14158	Fer	NC_000083.7	+	64288477	64288681	64288477	64288616	64298588	64298711	4044	36,79,94	0,4,4	58,61,58	5,7,6	214	149	5.36742e-06	7.86874e-05	1.0,0.932,0.942	0.89,0.859,0.871	0.085
7767	14182	Fgfr1	NC_000074.7	+	26047746	26047836	26047746	26047830	26048086	26048259	7767	7,26,6	3,18,22	16,27,17	7,1,2	155	149	5.72328e-06	8.36337e-05	0.692,0.581,0.208	0.687,0.963,0.891	-0.353
6598	73692	Cplane1	NC_000081.7	+	8199789	8199878	8199789	8199874	8201176	8201305	6598	20,6,10	17,3,3	7,11,21	5,0,4	153	149	5.82721e-06	8.48786e-05	0.534,0.661,0.764	0.577,1.0,0.836	-0.151
8153	23939	Mapk7	NC_000077.7	-	61384331	61384759	61384349	61384759	61383729	61383895	8153	0,0,0	0,3,1	6,3,0	0,0,0	167	149	5.98929e-06	8.69599e-05	NA,0.0,0.0	1.0,1.0,NA	-1
2313	228998	Arfgap1	NC_000068.8	+	180609017	180609607	180609017	180609122	180612843	180612907	2313	146108122	1,17,8	103,91,100	5,16,12	634	149	6.22625e-06	9.01115e-05	0.972,0.599,0.782	0.829,0.572,0.662	0.097
994	71276	Ccdc57	NC_000077.7	-	120770191	120772741	120772640	120772741	120769703	120769874	994	44,44,23	4,3,3	27,10,42	1,0,0	2598	149	6.79514e-06	9.80318e-05	0.387,0.457,0.305	0.608,1.0,1.0	-0.486
6297	23912	Rhof	NC_000071.7	-	123272676	123272780	123272686	123272780	123270297	123272493	6297	1,8,1	4,3,3	0,0,2	5,3,4	159	149	7.4895e-06	0.000107706	0.19,0.714,0.238	0.0,0.0,0.319	0.274
1389	76630	Stambpl1	NC_000085.7	+	34169628	34170031	34169628	34169995	34197586	34197666	1389	0,15,3	7,3,1	1,3,4	0,0,0	185	149	7.75879e-06	0.000111226	0.0,0.801,0.707	1.0,1.0,1.0	-0.497
146	18575	Pde1c	NC_000072.7	-	56059055	56059173	56059113	56059173	56049189	56049360	146	1,6,6	9,1,3	0,1,0	0,2,6	207	149	8.183e-06	0.000116937	0.074,0.812,0.59	NA,0.265,0.0	0.359
4778	66691	Gapvd1	NC_000068.8	-	34607264	34607394	34607327	34607394	34605216	34605342	4778	52,48,45	23,13,13	53,36,57	9,9,13	212	149	9.02788e-06	0.000128605	0.614,0.722,0.709	0.805,0.738,0.755	-0.084
2418	245595	Zfp711	NC_000086.8	+	111534435	111535181	111534435	111534573	111537800	111537845	2418	3,0,0	0,3,0	0,3,0	0,0,0	757	149	9.31968e-06	0.000131521	1.0,0.0,NA	NA,1.0,NA	-0.5
3079	105242900	Gm38983	NC_000073.7	-	29466466	29467678	29466478	29467678	29458991	29465813	3079	2,5,0	2,0,3	1,9,8	1,2,1	161	149	9.30612e-06	0.000131521	0.481,1.0,0.0	0.481,0.806,0.881	-0.229
6319	66258	Mrps17	NC_000071.7	+	129792747	129793675	129792747	129792958	129793790	129793930	6319	142,76,81	5,4,2	76,65,73	2,0,2	866	149	9.29693e-06	0.000131521	0.83,0.766,0.875	0.867,1.0,0.863	-0.086
7850	20678	Sox5	NC_000072.7	-	144727539	144728008	144727544	144728008	144571332	144571412	7850	4,12,12	4,8,13	19,17,11	7,3,15	154	149	9.4343e-06	0.000132725	0.492,0.592,0.472	0.724,0.846,0.415	-0.143
2330	68845	Pih1d1	NC_000073.7	+	44800035	44803964	44800035	44803844	44805729	44805823	2330	17,73,66	0,79,58	33,59,54	59,40,60	269	149	9.5638e-06	0.00013413	1.0,0.339,0.387	0.237,0.45,0.333	0.235
1525	22404	Wiz	NC_000083.7	-	32600029	32600130	32600057	32600130	32586797	32587121	1525	1,1,1	0,7,0	1,1,1	2,0,1	177	149	9.67747e-06	0.000135305	1.0,0.107,1.0	0.296,1.0,0.457	0.118
5376	21885	Tle1	NC_000070.7	-	72087328	72087433	72087358	72087433	72076449	72076651	5376	1,3,1	0,3,0	4,2,0	2,0,0	179	149	9.71636e-06	0.000135431	1.0,0.454,1.0	0.625,1.0,NA	0.005
7018	235044	Plppr2	NC_000075.7	+	21858241	21858364	21858241	21858348	21858676	21858728	7018	4,4,2	3,5,1	6,3,8	0,3,2	165	149	9.87554e-06	0.000137228	0.546,0.419,0.644	1.0,0.475,0.783	-0.216
5063	242864	Napepld	NC_000071.7	-	21905972	21906394	21906202	21906394	21888153	21888463	5063	7,3,6	2,4,5	5,3,5	0,3,1	379	149	9.98593e-06	0.000138337	0.579,0.228,0.321	1.0,0.282,0.663	-0.272
266	20335	Sec61g	NC_000077.7	-	16458078	16458484	16458099	16458484	16456372	16456472	266	2,11,5	2,2,8	4,4,8	11,11,4	170	149	1.03259e-05	0.000142611	0.467,0.828,0.354	0.242,0.242,0.637	0.176
7656	228778	6820408C15Rik	NC_000068.8	+	152283135	152283263	152283135	152283222	152284293	152284412	7656	0,4,3	9,6,0	0,1,3	8,3,8	190	149	1.05705e-05	0.000145545	0.0,0.343,1.0	0.0,0.207,0.227	0.303
5541	12125	Bcl2l11	NC_000068.8	+	127970539	127970934	127970539	127970676	127989004	127989114	5541	43,91,91	2,0,1	94,23,43	2,2,13	407	149	1.07434e-05	0.000147477	0.887,1.0,0.971	0.945,0.808,0.548	0.186
7420	108989	Tpr	NC_000067.7	+	150295588	150295754	150295588	150295748	150297386	150297553	7420	179175227	1,15,0	160166175	17,12,18	155	149	1.08396e-05	0.000148349	0.994,0.918,1.0	0.9,0.93,0.903	0.06
4531	52348	Vps37a	NC_000074.7	+	40994065	40996212	40994065	40994134	40996850	40996994	4531	160140119	134,48,62	164128176	47,46,58	2227	149	1.09392e-05	0.000149261	0.074,0.163,0.114	0.189,0.157,0.169	-0.055
80	56709	Dnajb12	NC_000076.7	+	59732171	59732317	59732171	59732269	59733312	59735118	80	7,24,13	30,45,52	8,12,8	51,41,56	197	149	1.21326e-05	0.000165047	0.15,0.287,0.159	0.106,0.181,0.098	0.07
4405	118568280	LOC118568280	NC_000082.7	-	44900705	44901021	44900821	44901021	44900225	44900367	4405	0,1,0	0,0,2	0,0,3	0,0,0	265	149	1.25688e-05	0.000170469	NA,1.0,0.0	NA,NA,1.0	-0.5
4165	78102	8430426J06Rik	NC_000081.7	-	81131876	81132172	81132115	81132172	81126854	81127620	4165	0,0,0	0,1,0	0,9,0	0,0,0	388	149	1.27835e-05	0.000172863	NA,0.0,NA	NA,1.0,NA	-1
1496	23880	Fyb	NC_000081.7	+	6674242	6674380	6674242	6674373	6676117	6676143	1496	0,4,0	0,0,0	4,0,2	0,1,0	156	149	1.28759e-05	0.000173595	NA,1.0,NA	1.0,0.0,1.0	0.333
8146	66480	Rpl15	NC_000080.7	+	4198714	4198873	4198714	4198851	4199235	4199417	8146	1,1,14	0,0,10	10,18,23	2,9,2	171	149	1.31321e-05	0.000176523	1.0,1.0,0.55	0.813,0.635,0.909	0.064
2600	26457	Slc27a1	NC_000074.7	+	72037485	72037720	72037485	72037650	72037989	72038136	2600	116,78,74	495294354	25,28,48	346321336	219	149	1.45341e-05	0.000194791	0.138,0.153,0.125	0.047,0.056,0.089	0.075
350	28006	Washc2	NC_000072.7	+	116233187	116233471	116233187	116233250	116233576	116233789	350	6,22,7	11,31,42	8,10,2	42,27,40	370	149	1.59465e-05	0.00021309	0.18,0.222,0.063	0.071,0.13,0.02	0.081
3061	20719	Serpinb6a	NC_000079.7	-	34119551	34119777	34119601	34119777	34115454	34115629	3061	87,80,69	14,20,10	65,46,53	20,13,16	199	149	1.60348e-05	0.00021364	0.823,0.75,0.838	0.709,0.726,0.713	0.088
798	93697	Ice2	NC_000075.7	+	69305185	69305959	69305185	69305781	69306227	69306369	798	30,11,2	0,4,1	5,4,3	8,4,0	327	149	1.71443e-05	0.000227752	1.0,0.556,0.477	0.222,0.313,1.0	0.166
5809	100038570	Prcd	NC_000077.7	+	116547947	116548133	116547947	116547981	116548363	116548432	5809	10,2,0	0,0,0	0,0,0	1,0,0	301	149	1.78348e-05	0.000236233	1.0,1.0,NA	0.0,NA,NA	1
1779	233899	Ccdc189	NC_000073.7	-	127184588	127184696	127184625	127184696	127184164	127184225	1779	0,1,0	0,0,3	0,0,0	1,3,0	186	149	1.81933e-05	0.000240279	NA,1.0,0.0	0.0,0.0,NA	0.5
7677	21428	Mlx	NC_000077.7	+	100978115	100978355	100978115	100978193	100978579	100978616	7677	19,42,36	3,24,15	42,19,27	14,26,16	311	149	1.84069e-05	0.000242393	0.752,0.456,0.535	0.59,0.259,0.447	0.149
5234	68507	Ppfia4	NC_000067.7	-	134243144	134244516	134244352	134244516	134241367	134241461	5234	6,0,2	0,2,0	0,2,0	0,0,0	1357	149	1.92346e-05	0.000252329	1.0,0.0,1.0	NA,1.0,NA	-0.333
5235	68507	Ppfia4	NC_000067.7	-	134243151	134244516	134244352	134244516	134241367	134241461	5235	7,0,2	0,2,0	0,2,0	0,0,0	1350	149	1.92728e-05	0.000252329	1.0,0.0,1.0	NA,1.0,NA	-0.333
5202	270035	Letm2	NC_000074.7	-	26083734	26084182	26083766	26084182	26082467	26082611	5202	18,9,11	2,0,0	5,9,12	2,1,2	181	149	1.93514e-05	0.000252627	0.881,1.0,1.0	0.673,0.881,0.832	0.165
936	218544	Sgtb	NC_000079.7	+	104246248	104246501	104246248	104246477	104247577	104247697	936	0,0,0	3,4,1	1,0,0	0,0,0	173	149	1.97249e-05	0.000256764	0.0,0.0,0.0	1.0,NA,NA	-1
6955	20224	Sar1a	NC_000076.7	+	61519839	61520110	61519839	61519966	61520658	61520732	6955	17,18,13	1,8,4	8,4,1	6,3,13	293	149	2.02403e-05	0.000262718	0.896,0.534,0.623	0.404,0.404,0.038	0.402
1090	54169	Kat6b	NC_000080.7	+	21674900	21675829	21674900	21674956	21676786	21676908	1090	92193168	9,26,24	139,97,190	3,9,1	1022	149	2.10318e-05	0.000272212	0.598,0.52,0.505	0.871,0.611,0.965	-0.275
6796	327743	Ccn6	NC_000076.7	-	39046721	39048797	39048626	39048797	39039588	39043884	6796	21,19,26	0,2,1	18,22,28	2,0,2	2054	149	2.12874e-05	0.000274735	1.0,0.408,0.654	0.395,1.0,0.504	0.054
3837	18193	Nsd1	NC_000079.7	+	55359492	55359920	55359492	55359656	55361016	55361963	3837	5,14,16	9,0,13	11,20,13	5,0,9	413	149	2.25036e-05	0.000289384	0.167,1.0,0.307	0.442,1.0,0.343	-0.104
8115	68394	Ccdc163	NC_000070.7	+	116567297	116567481	116567297	116567477	116572036	116572301	8115	2,0,0	0,0,0	0,0,1	2,0,0	153	149	2.25502e-05	0.000289384	1.0,NA,NA	0.0,NA,1.0	0.5
5349	381022	Kmt2d	NC_000081.7	-	98754487	98754709	98754493	98754709	98754150	98754270	5349	63,77,69	15,36,41	72,79,80	26,20,21	155	149	2.32495e-05	0.000297515	0.801,0.673,0.618	0.727,0.792,0.786	-0.071
6655	13025	Ctla2b	NC_000079.7	-	61043758	61043957	61043834	61043957	61043173	61043533	6655	2,5,6	3,5,1	5,2,7	1,0,1	225	149	2.4776e-05	0.000316155	0.306,0.398,0.799	0.768,1.0,0.823	-0.363
3537	13209	Ddx6	NC_000075.7	+	44516188	44516445	44516188	44516249	44518419	44518889	3537	2,14,14	23,31,43	23,8,7	0,38,36	345	149	2.51407e-05	0.000319908	0.036,0.163,0.123	1.0,0.083,0.077	-0.279
1334	230088	Fam214b	NC_000070.7	-	43039814	43040357	43039965	43040357	43037062	43037206	1334	11,28,28	8,29,22	9,29,23	25,22,36	300	149	2.61061e-05	0.000331262	0.406,0.324,0.387	0.152,0.396,0.241	0.109
1605	227632	Kcnt1	NC_000068.8	+	25782345	25782569	25782345	25782420	25783140	25783235	1605	1,1,0	0,0,0	0,0,0	2,0,0	298	149	2.66074e-05	0.00033668	1.0,1.0,NA	0.0,NA,NA	1
5015	74528	Mgme1	NC_000068.8	+	144112823	144112992	144112823	144112867	144113834	144114404	5015	13,14,15	10,33,25	6,5,7	34,25,34	274	149	2.68383e-05	0.000338656	0.414,0.187,0.246	0.088,0.098,0.101	0.187
5814	73744	Man2c1	NC_000075.7	+	57046881	57046996	57046881	57046992	57047137	57047248	5814	0,0,0	0,0,6	0,1,1	0,1,0	153	149	2.88866e-05	0.00036349	NA,NA,0.0	NA,0.493,1.0	-0.746
5993	235283	Gramd1b	NC_000075.7	-	40209241	40209375	40209281	40209375	40204528	40205723	5993	2,3,3	1,2,4	4,2,5	0,2,0	189	149	2.91043e-05	0.000365214	0.612,0.542,0.372	1.0,0.441,1.0	-0.305
1717	382073	Ccdc84	NC_000075.7	-	44323608	44324319	44323749	44324319	44321987	44322077	1717	4,9,3	5,3,14	3,5,5	0,2,1	290	149	2.94296e-05	0.000367262	0.291,0.607,0.099	1.0,0.562,0.72	-0.428
934	104111	Adcy3	NC_000078.7	+	4183396	4183778	4183396	4183719	4184152	4185000	934	1,6,8	5,2,2	2,3,6	1,0,0	208	149	2.94072e-05	0.000367262	0.125,0.682,0.741	0.589,1.0,1.0	-0.347
2042	246102	Rttn	NC_000084.7	+	89127374	89127483	89127374	89127472	89128797	89128875	2042	0,0,1	4,4,0	0,0,0	0,0,6	160	149	2.96891e-05	0.00036847	0.0,0.0,1.0	NA,NA,0.0	0.333
871	53623	Gria3	NC_000086.8	+	40761095	40761354	40761095	40761343	40765216	40767478	871	0,0,0	6,0,0	1,0,0	0,0,0	160	149	2.96891e-05	0.00036847	0.0,NA,NA	1.0,NA,NA	-1
5891	232878	Zscan22	NC_000073.7	+	12631735	12631907	12631735	12631804	12640160	12643010	5891	0,0,0	2,0,0	1,1,2	0,0,0	252	149	3.09858e-05	0.000383513	0.0,NA,NA	1.0,1.0,1.0	-1
2903	12144	Blm	NC_000073.7	-	80110389	80110600	80110477	80110600	80108560	80108744	2903	1,0,0	0,5,0	0,0,0	2,0,3	237	149	3.26072e-05	0.000402482	1.0,0.0,NA	0.0,NA,0.0	0.5
5223	100043772	Zfp850	NC_000073.7	-	27713440	27713634	27713445	27713634	27711760	27711875	5223	5,9,3	0,0,0	3,0,0	3,1,2	154	149	3.35064e-05	0.000412457	1.0,1.0,1.0	0.492,0.0,0.0	0.836
1523	52855	Lair1	NC_000073.7	-	4058795	4058952	4058916	4058952	4013728	4013845	1523	0,1,0	0,0,1	0,0,3	3,0,0	270	149	3.38662e-05	0.000415756	NA,1.0,0.0	0.0,NA,1.0	0
4359	70821	4921507P07Rik	NC_000072.7	-	50573166	50573847	50573422	50573847	50572777	50572933	4359	0,10,1	0,1,1	0,1,0	1,1,3	405	149	3.40427e-05	0.000416793	NA,0.786,0.269	0.0,0.269,0.0	0.438
3423	14588	Gfra4	NC_000068.8	-	130882870	130883070	130882935	130883070	130882318	130882395	3423	2,0,3	21,0,8	0,6,3	1,3,1	214	149	3.50874e-05	0.000427385	0.062,NA,0.207	0.0,0.582,0.676	-0.285
3921	71101	Uvssa	NC_000071.7	+	33536039	33536261	33536039	33536072	33536569	33536669	3921	12,11,4	0,1,1	9,8,3	3,4,4	338	149	3.50965e-05	0.000427385	1.0,0.829,0.638	0.569,0.469,0.248	0.394
1880	115486898	Gm17344	NC_000074.7	-	110586504	110586663	110586566	110586663	110579165	110580422	1880	1,0,0	0,0,0	0,0,0	2,0,0	211	149	3.56558e-05	0.000431874	1.0,NA,NA	0.0,NA,NA	1
916	81845	Gpank1	NC_000083.7	+	35341204	35341436	35341204	35341267	35342028	35342635	916	1,2,0	0,0,1	0,0,3	0,0,0	318	149	3.56429e-05	0.000431874	1.0,1.0,0.0	NA,NA,1.0	-0.333
3649	100041621	Gm3435	NC_000083.7	+	15237402	15238196	15237402	15237539	15238346	15238461	3649	0,0,0	0,2,0	0,1,0	2,0,1	806	149	3.76824e-05	0.000455204	NA,0.0,NA	0.0,1.0,0.0	-0.333
2768	66442	Spc25	NC_000068.8	-	69036173	69036557	69036407	69036557	69035369	69035522	2768	0,0,0	0,0,3	4,2,1	3,0,0	383	149	3.92139e-05	0.000471191	NA,NA,0.0	0.342,1.0,1.0	-0.781
7031	26447	Poli	NC_000084.7	-	70659592	70659792	70659627	70659792	70658446	70658599	7031	0,0,0	2,2,0	1,0,0	0,0,1	184	149	3.91294e-05	0.000471191	0.0,0.0,NA	1.0,NA,0.0	-0.5
8274	76408	Abcc3	NC_000077.7	-	94248006	94248232	94248032	94248232	94247798	94247925	8274	0,0,0	2,0,0	1,0,0	0,0,5	175	149	4.03474e-05	0.000483529	0.0,NA,NA	1.0,NA,0.0	-0.5
5957	68031	Rnf146	NC_000076.7	-	29237959	29238438	29237979	29238438	29237280	29237341	5957	0,0,0	0,2,0	1,1,8	3,0,4	169	149	4.11725e-05	0.000492114	NA,0.0,NA	0.227,1.0,0.638	-0.622
91	12728	Clcn5	NC_000086.8	-	7184622	7184727	7184640	7184727	7182897	7183062	91	1,0,0	0,0,0	0,0,0	2,0,2	167	149	4.14494e-05	0.000494121	1.0,NA,NA	0.0,NA,0.0	1
5486	654804	4732471J01Rik	NC_000073.7	+	25096114	25096401	25096114	25096331	25116825	25116934	5486	2,2,2	1,4,0	0,0,0	1,0,5	219	149	4.39891e-05	0.00052302	0.576,0.254,1.0	0.0,NA,0.0	0.61
1417	320816	Ankrd16	NC_000068.8	+	11784487	11784708	11784487	11784634	11786287	11786330	1417	8,19,16	0,1,0	5,19,18	3,6,1	223	149	4.41512e-05	0.000523574	1.0,0.927,1.0	0.527,0.679,0.923	0.266
7256	110962	Mbd6	NC_000076.7	-	127124218	127124524	127124223	127124524	127123495	127123559	7256	0,0,0	0,0,1	0,0,2	1,2,0	154	149	4.46434e-05	0.000528028	NA,NA,0.0	0.0,0.0,1.0	-0.333
1896	241066	Carf	NC_000067.7	+	60144469	60144593	60144469	60144586	60148380	60148608	1896	2,0,0	0,0,2	0,0,0	1,1,0	156	149	4.49011e-05	0.000529693	1.0,NA,0.0	0.0,0.0,NA	0.5
4062	16348	Invs	NC_000070.7	+	48389958	48390151	48389958	48390139	48392613	48392693	4062	0,0,0	0,1,0	0,2,0	0,0,0	161	149	4.5514e-05	0.000535529	NA,0.0,NA	NA,1.0,NA	-1
8136	14794	Spsb2	NC_000072.7	+	124785623	124785758	124785623	124785742	124786189	124786932	8136	0,5,0	1,0,0	2,0,0	0,0,0	165	149	4.59734e-05	0.000539532	0.0,1.0,NA	1.0,NA,NA	-0.5
1328	57745	Zfp112	NC_000073.7	+	23811347	23811861	23811347	23811827	23821658	23821785	1328	0,0,2	0,0,0	0,1,0	0,0,1	183	149	4.77313e-05	0.000558715	NA,NA,1.0	NA,1.0,0.0	0.5
4414	28199	Dcaf11	NC_000080.7	+	55797897	55798275	55797897	55798084	55798666	55798899	4414	33,72,62	2,9,0	30,37,39	16,8,9	340	149	4.94195e-05	0.000576986	0.879,0.778,1.0	0.451,0.67,0.655	0.294
3316	68977	Haghl	NC_000083.7	-	26004396	26004560	26004401	26004560	26003634	26003699	3316	0,1,1	0,6,7	1,0,2	1,0,0	154	149	5.01196e-05	0.000583655	NA,0.139,0.121	0.492,NA,1.0	-0.616
2978	74051	Steap2	NC_000071.7	-	5743602	5744089	5743957	5744089	5733291	5733417	2978	0,1,0	0,0,0	0,0,0	0,5,0	504	149	5.95462e-05	0.000691652	NA,1.0,NA	NA,0.0,NA	1
1027	16882	Lig3	NC_000077.7	+	82671934	82672102	82671934	82672098	82674171	82674725	1027	8,8,5	13,0,0	20,10,8	0,0,0	153	149	6.46662e-05	0.000747291	0.375,1.0,1.0	1.0,1.0,1.0	-0.208
545	70796	Zdhhc1	NC_000074.7	-	106202655	106202768	106202670	106202768	106200115	106200198	545	21,27,29	1,0,3	28,29,18	2,5,8	164	149	6.46623e-05	0.000747291	0.95,1.0,0.898	0.927,0.84,0.672	0.136
3664	338348	Ttc16	NC_000068.8	-	32664805	32665107	32665059	32665107	32664402	32664569	3664	0,0,1	0,0,0	0,0,0	0,0,1	403	149	6.73671e-05	0.000776522	NA,NA,1.0	NA,NA,0.0	1
5871	75883	4930568A12Rik	NC_000067.7	-	34524585	34525243	34524825	34525243	34523868	34523994	5871	1,1,1	0,0,0	0,0,0	1,0,0	389	149	6.84414e-05	0.000786903	1.0,1.0,1.0	0.0,NA,NA	1
5421	67630	Samd8	NC_000080.7	+	21800598	21800904	21800598	21800848	21825030	21825623	5421	39,41,33	29,35,29	31,36,38	25,14,20	205	149	6.9105e-05	0.000792521	0.494,0.46,0.453	0.474,0.651,0.58	-0.099
4179	52830	Pnrc2	NC_000070.7	-	135600574	135600978	135600587	135600978	135600205	135600410	4179	3,6,9	2,5,3	6,5,9	8,9,2	162	149	6.94617e-05	0.0007946	0.58,0.525,0.734	0.408,0.338,0.805	0.096
4714	27215	Azi2	NC_000075.7	+	117888124	117888734	117888124	117888243	117890781	117892648	4714	168155135	12,10,11	90,72,128	15,11,14	640	149	6.96804e-05	0.000795094	0.765,0.783,0.741	0.583,0.604,0.68	0.141
5797	54613	St3gal6	NC_000082.7	-	58343438	58344035	58343864	58344035	58327810	58327977	5797	15,90,69	1,27,29	95,90,123	49,45,49	575	149	7.01971e-05	0.000798978	0.795,0.463,0.381	0.334,0.341,0.394	0.19
4806	66317	Wdr61	NC_000075.7	-	54641652	54641833	54641758	54641833	54638670	54638721	4806	28,13,7	4,13,12	18,22,25	14,8,4	255	149	7.55913e-05	0.000858217	0.804,0.369,0.254	0.429,0.616,0.785	-0.134
3247	230996	9430015G10Rik	NC_000070.7	+	156194454	156194630	156194454	156194480	156198345	156198458	3247	1,0,1	0,0,0	0,0,0	0,3,1	299	149	7.57851e-05	0.000858267	1.0,NA,1.0	NA,0.0,0.0	1
3136	11670	Aldh3a1	NC_000077.7	+	61099567	61099739	61099567	61099607	61103052	61103219	3136	0,3,0	2,1,1	0,0,1	0,0,0	281	149	7.72976e-05	0.000873213	0.0,0.614,0.0	NA,NA,1.0	-0.795
8126	102634657	Gm32191	NC_000072.7	+	97246123	97246308	97246123	97246213	97246614	97247027	8126	0,0,0	1,1,0	1,0,0	0,0,0	244	149	8.03297e-05	0.000905208	0.0,0.0,NA	1.0,NA,NA	-1
4670	110253	Triobp	NC_000081.7	+	78832380	78832613	78832380	78832538	78835103	78835255	4670	0,1,0	0,0,0	0,0,0	2,1,1	224	149	8.18555e-05	0.000920112	NA,1.0,NA	0.0,0.0,0.0	1
1226	231646	Myo1h	NC_000071.7	+	114494875	114495074	114494875	114495050	114495979	114496139	1226	1,0,1	0,0,0	0,2,0	1,0,0	173	149	8.48127e-05	0.000925298	1.0,NA,1.0	0.0,1.0,NA	0.5
1682	52398	Septin11	NC_000071.7	+	93286296	93286455	93286296	93286396	93287307	93287422	1682	0,0,2	0,1,0	2,1,0	0,0,0	208	149	8.29675e-05	0.000925298	NA,0.0,1.0	1.0,1.0,NA	-0.5
2608	231571	Rpap2	NC_000071.7	+	107749596	107749725	107749596	107749711	107749821	107749847	2608	0,0,0	0,0,1	0,0,1	0,0,0	163	149	8.51132e-05	0.000925298	NA,NA,0.0	NA,NA,1.0	-1
3463	21400	Tcea2	NC_000068.8	+	181322089	181322528	181322089	181322268	181325005	181325068	3463	8,12,14	8,7,7	10,16,10	3,1,2	409	149	8.32427e-05	0.000925298	0.267,0.384,0.421	0.548,0.854,0.646	-0.325
3656	192236	Hps1	NC_000085.7	-	42755124	42755272	42755148	42755272	42754351	42754421	3656	0,3,0	1,0,0	1,0,0	0,0,0	173	149	8.48127e-05	0.000925298	0.0,1.0,NA	1.0,NA,NA	-0.5
3695	546144	Wdr72	NC_000075.7	+	74055483	74055665	74055483	74055629	74056002	74056099	3695	0,0,0	1,2,0	1,0,0	0,0,0	185	149	8.42985e-05	0.000925298	0.0,0.0,NA	1.0,NA,NA	-1
3750	217125	Samd14	NC_000077.7	+	94910186	94910359	94910186	94910348	94910755	94911044	3750	0,0,2	0,1,1	0,1,0	0,0,0	160	149	8.51765e-05	0.000925298	NA,0.0,0.651	NA,1.0,NA	-0.674
3975	208908	Ccdc62	NC_000071.7	+	124076212	124076314	124076212	124076260	124082196	124082368	3975	1,0,4	0,0,0	0,1,0	1,0,0	203	149	8.32879e-05	0.000925298	1.0,NA,1.0	0.0,1.0,NA	0.5
3977	208908	Ccdc62	NC_000071.7	+	124089261	124089389	124089261	124089350	124092119	124092842	3977	0,0,0	0,1,0	0,1,0	0,0,0	188	149	8.41479e-05	0.000925298	NA,0.0,NA	NA,1.0,NA	-1
4266	67116	Cuedc2	NC_000085.7	-	46326958	46327110	46327007	46327110	46326751	46326859	4266	0,0,2	0,1,0	2,1,0	0,0,0	198	149	8.35926e-05	0.000925298	NA,0.0,1.0	1.0,1.0,NA	-0.5
6016	56031	Ppie	NC_000070.7	-	123030620	123030691	123030633	123030691	123029388	123029470	6016	0,0,0	0,1,0	0,1,0	0,0,0	162	149	8.51357e-05	0.000925298	NA,0.0,NA	NA,1.0,NA	-1
6488	115487953	Gm51959	NC_000078.7	+	110953556	110953881	110953556	110953863	110954351	110954745	6488	0,0,0	1,0,0	1,0,0	0,0,2	167	149	8.50087e-05	0.000925298	0.0,NA,NA	1.0,NA,0.0	-0.5
7266	107999	Gtpbp6	NC_000071.7	-	110255377	110255715	110255398	110255715	110254925	110255063	7266	0,1,1	1,0,0	0,0,0	0,0,1	170	149	8.49163e-05	0.000925298	0.0,1.0,1.0	NA,NA,0.0	0.667
7372	23877	Fiz1	NC_000073.7	-	5017082	5017252	5017107	5017252	5015676	5016021	7372	0,1,1	0,0,0	0,0,0	0,1,0	174	149	8.47758e-05	0.000925298	NA,1.0,1.0	NA,0.0,NA	1
7542	17350	Mlh1	NC_000075.7	-	111076943	111078381	111078287	111078381	111076317	111076471	7542	54,72,45	14,22,8	40,23,41	16,10,16	1493	149	8.61881e-05	0.000934048	0.278,0.246,0.36	0.2,0.187,0.204	0.098
3928	72462	Rrp1b	NC_000083.7	+	32274078	32274289	32274078	32274098	32274884	32274971	3928	3,0,1	0,0,6	0,2,1	0,7,0	340	149	8.81156e-05	0.000952658	1.0,NA,0.068	NA,0.111,1.0	-0.021
3824	15357	Hmgcr	NC_000079.7	-	96806908	96807444	96807318	96807444	96803028	96803216	3824	2,2,11	6,3,13	9,4,14	8,5,7	559	149	9.59023e-05	0.00103437	0.082,0.151,0.184	0.231,0.176,0.348	-0.113
3704	16593	Klc1	NC_000078.7	+	111755758	111755920	111755758	111755893	111760082	111760133	3704	19,23,27	1,11,2	13,21,20	0,1,1	176	149	9.70073e-05	0.00104381	0.941,0.639,0.92	1.0,0.947,0.944	-0.13
1527	22404	Wiz	NC_000083.7	-	32600029	32600130	32600057	32600130	32597813	32598092	1527	1,2,0	3,1,0	1,3,1	0,3,4	177	149	0.000102313	0.00109829	0.219,0.627,NA	1.0,0.457,0.174	-0.121
177	382010	Cep44	NC_000074.7	-	57003579	57010052	57003722	57010052	57000422	57000559	177	17,29,16	0,0,2	26,14,33	2,5,0	292	149	0.000103408	0.00110742	1.0,1.0,0.803	0.869,0.588,1.0	0.115
1640	74006	Dnm1l	NC_000082.7	-	16163843	16164009	16163861	16164009	16160560	16160599	1640	1,4,13	13,15,16	9,7,5	5,11,12	167	149	0.000106905	0.00114217	0.064,0.192,0.42	0.616,0.362,0.271	-0.191
1438	12818	Col14a1	NC_000081.7	+	55274965	55275117	55274965	55275108	55282083	55282213	1438	2,0,2	32,14,5	2,3,0	8,2,2	158	149	0.000107611	0.00114701	0.056,0.0,0.274	0.191,0.586,0.0	-0.149
4378	67040	Ddx17	NC_000081.7	-	79417175	79420217	79420157	79420217	79415878	79416115	4378	346630573534	146,68,39	208718652365	75,65,100	3131	149	0.000108327	0.00115192	0.53,0.681,0.812	0.57,0.577,0.53	0.115
2309	22230	Ufd1	NC_000082.7	+	18633579	18633712	18633579	18633686	18634078	18634111	2309	62,87,82	11,15,13	100,115,93	7,1,9	175	149	0.000111579	0.00118373	0.828,0.832,0.843	0.924,0.99,0.898	-0.103
30	98193	Dcaf8	NC_000067.7	+	171975581	171975905	171975581	171975735	171976815	171976888	30	121226194	31,78,92	193160221	108,102,96	319	149	0.000114734	0.00121436	0.646,0.575,0.496	0.455,0.423,0.518	0.107
1241	29808	Mga	NC_000068.8	+	119716771	119728458	119716771	119727827	119733086	119734214	1241	32,35,54	2,23,0	39,25,40	20,20,41	780	149	0.000116005	0.00122495	0.753,0.225,1.0	0.271,0.193,0.157	0.452
7950	66131	Tipin	NC_000075.7	+	64188867	64188934	64188867	64188929	64195389	64195525	7950	0,1,4	0,0,1	0,0,0	2,0,1	154	149	0.000118645	0.00124991	NA,1.0,0.795	0.0,NA,0.0	0.897
4673	75729	Fam227a	NC_000081.7	-	79525365	79526461	79526314	79526461	79524844	79524946	4673	6,11,11	0,4,4	3,0,4	1,0,2	1098	149	0.000135074	0.00141968	1.0,0.272,0.272	0.289,NA,0.213	0.264
1707	66869	Zfp869	NC_000074.7	-	70168933	70169552	70169417	70169552	70166951	70167059	1707	22,41,52	0,1,9	28,28,28	1,3,8	633	149	0.00013724	0.00143911	1.0,0.906,0.576	0.868,0.687,0.452	0.158
8010	242509	Bnc2	NC_000070.7	-	84528231	84528434	84528345	84528434	84474015	84474141	8010	0,0,1	2,0,0	0,0,1	0,1,3	263	149	0.000141521	0.00148058	0.0,NA,1.0	NA,0.0,0.159	0.42
6820	27049	Etv3	NC_000069.7	+	87432884	87433285	87432884	87432966	87434567	87434623	6820	6,29,15	16,39,30	28,20,37	22,21,14	468	149	0.000144856	0.00151197	0.107,0.191,0.137	0.288,0.233,0.457	-0.181
1084	14789	P3h3	NC_000072.7	-	124831544	124831942	124831810	124831942	124831273	124831410	1084	15,7,10	32,26,17	2,4,3	12,16,16	415	149	0.0001469	0.00152978	0.144,0.088,0.174	0.056,0.082,0.063	0.068
7701	114604	Prdm15	NC_000082.7	-	97652968	97653050	97652972	97653050	97641122	97641168	7701	1,0,5	3,8,3	2,1,8	0,8,4	153	149	0.000153616	0.00159606	0.245,0.0,0.619	1.0,0.109,0.661	-0.302
2029	102633863	Gm31588	NC_000075.7	-	92107751	92114186	92109216	92114186	92104098	92104213	2029	193184212	4,11,15	125,81,122	0,5,6	1614	149	0.000155416	0.00161106	0.817,0.607,0.566	1.0,0.599,0.652	-0.087
7258	14132	Fcgrt	NC_000073.7	-	44751825	44752095	44751837	44752095	44751333	44751609	7258	44,41,46	62140106	31,29,42	169130173	161	149	0.00015862	0.00164053	0.396,0.213,0.287	0.145,0.171,0.183	0.132
1	21413	Tcf4	NC_000084.7	+	69811037	69811200	69811037	69811188	69814639	69814869	1	50,73,80	30,83,111	79,65,84	69,48,63	161	149	0.000160725	0.0016585	0.607,0.449,0.4	0.514,0.556,0.552	-0.055
763	234825	Klhdc4	NC_000074.7	-	122548018	122548097	122548041	122548097	122546860	122546959	763	21,16,23	0,8,6	35,23,19	2,0,2	172	149	0.00016338	0.00168207	1.0,0.634,0.769	0.938,1.0,0.892	-0.142
3314	26410	Map3k8	NC_000084.7	-	4334612	4334769	4334616	4334769	4333817	4334064	3314	0,0,1	2,8,16	7,2,1	5,3,10	153	149	0.000164852	0.00169338	0.0,0.0,0.057	0.577,0.394,0.089	-0.334
6432	234594	Cnot1	NC_000074.7	-	96459698	96459951	96459719	96459951	96457040	96457289	6432	100,64,64	64,51,50	51,54,72	66,42,69	170	149	0.000174315	0.00178654	0.578,0.524,0.529	0.404,0.53,0.478	0.073
3259	71687	Tmem25	NC_000075.7	-	44710326	44710544	44710477	44710544	44709960	44710054	3259	4,5,6	0,2,1	10,2,9	7,6,2	300	149	0.000189289	0.00193562	1.0,0.554,0.749	0.415,0.142,0.691	0.352
262	69232	Qrich1	NC_000075.7	+	108394009	108395175	108394009	108394451	108395965	108396025	262	67,54,40	0,6,9	77,59,58	0,3,0	873	149	0.000190278	0.00194135	1.0,0.606,0.431	1.0,0.77,1.0	-0.244
5448	212123	Dcaf15	NC_000074.7	-	84824251	84824481	84824365	84824481	84823697	84824137	5448	4,1,0	42,26,16	4,2,2	11,9,10	263	149	0.000192844	0.00196311	0.051,0.021,0.0	0.171,0.112,0.102	-0.104
4726	230577	Pars2	NC_000070.7	+	106508265	106508345	106508265	106508328	106510314	106512479	4726	0,0,7	0,2,3	2,1,3	6,1,1	166	149	0.000194278	0.00197327	NA,0.0,0.677	0.23,0.473,0.729	-0.139
2036	67102	D16Ertd472e	NC_000082.7	-	78373078	78373576	78373311	78373576	78372808	78372942	2036	11,20,13	4,2,8	9,7,12	2,0,0	382	149	0.000206133	0.002089	0.518,0.796,0.388	0.637,1.0,1.0	-0.312
1284	19261	Sirpa	NC_000068.8	+	129432961	129434924	129432961	129434812	129435523	129435614	1284	0,1,0	0,7,5	1,3,5	0,5,0	261	149	0.000213722	0.00216107	NA,0.075,0.0	1.0,0.255,1.0	-0.714
7978	20397	Sgpl1	NC_000076.7	-	60983301	60983463	60983363	60983463	60982036	60982110	7978	0,12,1	6,13,12	6,11,8	4,10,7	211	149	0.000220513	0.00222478	0.0,0.395,0.056	0.514,0.437,0.447	-0.316
3826	15357	Hmgcr	NC_000079.7	-	96806955	96807444	96807318	96807444	96803028	96803216	3826	1,2,10	6,3,13	9,4,13	8,5,7	512	149	0.000226751	0.00228263	0.046,0.162,0.183	0.247,0.189,0.351	-0.132
359	237411	Zfp938	NC_000076.7	-	82063278	82063425	82063364	82063425	82060683	82062427	359	7,3,6	2,7,4	1,3,4	7,9,11	235	149	0.00023571	0.00236756	0.689,0.214,0.487	0.083,0.174,0.187	0.315
1017	67242	Gemin6	NC_000083.7	+	80531879	80532103	80531879	80532099	80533049	80533193	1017	0,0,0	0,10,7	5,4,5	19,9,9	153	149	0.000243249	0.00243787	NA,0.0,0.0	0.204,0.302,0.351	-0.286
3889	64009	Syne1	NC_000076.7	-	5376212	5376275	5376254	5376275	5375667	5375760	3889	7,6,10	5,2,0	1,3,0	0,0,0	191	149	0.000259952	0.00259952	0.522,0.701,1.0	1.0,1.0,NA	-0.259
7228	623661	Lipt1	NC_000067.7	+	37911430	37911726	37911430	37911669	37913944	37915309	7228	3,1,0	0,2,0	8,5,2	6,2,3	206	149	0.000265461	0.00264876	1.0,0.266,NA	0.491,0.644,0.325	0.146
7103	50767	Pnpla6	NC_000074.7	+	3587766	3588085	3587766	3587883	3591290	3591592	7103	6,9,13	7,1,11	3,5,10	3,0,1	351	149	0.000304373	0.00303035	0.267,0.793,0.334	0.298,1.0,0.809	-0.238
1022	73162	Otud3	NC_000070.7	-	138629021	138629285	138629162	138629285	138625317	138625449	1022	2,0,0	17,23,30	2,4,12	26,23,28	290	149	0.000319432	0.00316955	0.057,0.0,0.0	0.038,0.082,0.18	-0.081
6339	12955	Cryab	NC_000075.7	+	50664270	50664395	50664270	50664384	50664485	50664777	6339	8,18,16	0,6,4	22,13,19	0,1,2	160	149	0.000319754	0.00316955	1.0,0.736,0.788	1.0,0.924,0.898	-0.099
115	223435	Trio	NC_000081.7	-	28006386	28022292	28021797	28022292	27919302	27919377	115	189513851513	2,5,0	10168741134	3,1,5	15560	149	0.000323436	0.00319905	0.901,0.726,1.0	0.764,0.893,0.685	0.095
3630	107817	Jmjd6	NC_000077.7	-	116730468	116730757	116730663	116730757	116729815	116729954	3630	21,5,11	8,7,1	11,16,13	9,7,12	344	149	0.000325795	0.00321536	0.532,0.236,0.827	0.346,0.497,0.319	0.144
6352	66505	Zmynd11	NC_000079.7	-	9815090	9815357	9815196	9815357	9785367	9785502	6352	8,19,20	3,6,3	11,13,8	0,6,10	255	149	0.00033168	0.00326633	0.609,0.649,0.796	1.0,0.559,0.319	0.059
8250	16826	Ldb2	NC_000071.7	-	44636434	44636586	44636440	44636586	44629474	44630854	8250	0,2,3	0,0,5	1,5,3	0,4,0	155	149	0.000333472	0.00327685	NA,1.0,0.366	1.0,0.546,1.0	-0.166
2761	28042	Selenoi	NC_000071.7	+	30462709	30462818	30462709	30462759	30468068	30468117	2761	46,12,23	10,4,1	30,14,22	0,0,1	208	149	0.000367321	0.00360166	0.767,0.682,0.943	1.0,1.0,0.94	-0.183
1416	320816	Ankrd16	NC_000068.8	+	11784487	11784939	11784487	11784708	11786287	11786330	1416	18,14,21	2,3,8	6,8,11	2,8,9	380	149	0.000368763	0.00360798	0.779,0.647,0.507	0.541,0.282,0.324	0.262
7617	320869	Spata33	NC_000074.7	+	123939826	123940053	123939826	123939976	123941052	123943650	7617	0,4,1	0,0,0	21,12,12	2,5,3	226	149	0.000374265	0.00365392	NA,1.0,1.0	0.874,0.613,0.725	0.263
5322	100503659	Cbarp	NC_000076.7	-	79972496	79972577	79972523	79972577	79972183	79972328	5322	5,6,1	0,3,3	0,0,1	1,0,0	176	149	0.000404614	0.00394172	1.0,0.629,0.22	0.0,NA,1.0	0.116
7391	53415	Htatip2	NC_000073.7	+	49408853	49409059	49408853	49408893	49409345	49409541	7391	15,38,22	1,11,5	22,31,33	11,5,15	315	149	0.000411619	0.00400136	0.876,0.62,0.675	0.486,0.746,0.51	0.143
5545	74766	Yipf2	NC_000075.7	-	21504022	21504127	21504032	21504127	21503823	21503884	5545	0,4,0	2,5,0	4,5,11	4,5,2	159	149	0.000441861	0.00428615	0.0,0.428,NA	0.484,0.484,0.838	-0.388
7458	67712	Slc25a37	NC_000080.7	-	69486331	69487071	69486842	69487071	69485029	69485086	7458	41,60,57	1,6,3	71,64,56	9,12,12	660	149	0.000448603	0.00434225	0.902,0.693,0.811	0.64,0.546,0.513	0.236
7642	79566	Sh3bp5l	NC_000077.7	+	58221532	58221628	58221532	58221618	58222079	58222689	7642	0,9,6	15,25,0	0,0,0	30,25,28	159	149	0.000465449	0.0044957	0.0,0.252,1.0	0.0,0.0,0.0	0.417
7062	20466	Sin3a	NC_000075.7	+	57025353	57025455	57025353	57025446	57026376	57026471	7062	8,6,1	45,55,43	0,0,2	25,28,30	158	149	0.000485656	0.0046809	0.144,0.093,0.021	0.0,0.0,0.059	0.066
6248	233902	Fbxl19	NC_000073.7	+	127350036	127350198	127350036	127350069	127351181	127351693	6248	16,11,9	5,0,0	7,9,12	6,4,0	278	149	0.000488396	0.00469731	0.632,1.0,1.0	0.385,0.547,1.0	0.233
4160	207965	Vcpkmt	NC_000078.7	-	69629293	69629399	69629304	69629399	69629049	69629119	4160	1,7,7	1,2,1	0,5,1	6,6,1	160	149	0.000515449	0.00493654	0.482,0.765,0.867	0.0,0.437,0.482	0.398
5570	101861	Ints4	NC_000073.7	+	97144863	97145049	97144863	97145022	97148755	97148806	5570	54,73,69	29,13,11	76,61,76	15,10,11	176	149	0.000514437	0.00493654	0.612,0.826,0.842	0.811,0.838,0.854	-0.074
4676	76681	Trim12a	NC_000073.7	-	103964507	103964702	103964617	103964702	103956118	103956594	4676	3,5,0	3,6,14	4,5,4	9,5,0	259	149	0.000537727	0.00513903	0.365,0.324,0.0	0.204,0.365,1.0	-0.293
1817	114863	Plpbp	NC_000074.7	+	27539201	27541429	27539201	27539336	27542263	27542362	1817	472338336	1,7,1	286205279	0,1,0	2242	149	0.000573818	0.00547242	0.969,0.762,0.957	1.0,0.932,1.0	-0.081
2973	80911	Acox3	NC_000071.7	+	35740377	35740663	35740377	35740478	35741219	35741319	2973	17,16,17	26,32,34	24,25,14	14,28,29	334	149	0.00058684	0.00558484	0.226,0.182,0.182	0.433,0.285,0.177	-0.102
6780	76539	Fam204a	NC_000085.7	-	60214663	60215133	60215075	60215133	60209485	60209736	6780	23,121,92	5,9,20	130,88,112	13,10,9	561	149	0.00060283	0.00572499	0.55,0.781,0.55	0.726,0.7,0.768	-0.104
7713	73469	Rnf38	NC_000070.7	-	44167465	44167946	44167626	44167946	44152359	44152553	7713	5,10,4	0,7,0	10,7,10	4,15,19	310	149	0.000610588	0.00578654	1.0,0.407,1.0	0.546,0.183,0.202	0.492
4221	627049	Zfp800	NC_000072.7	-	28261376	28261923	28261478	28261923	28260716	28260835	4221	10,12,4	13,6,17	4,18,3	7,0,3	251	149	0.00063098	0.00596731	0.313,0.543,0.123	0.253,1.0,0.372	-0.215
3054	235682	Zfp445	NC_000075.7	-	122686131	122686226	122686167	122686226	122685763	122685890	3054	10,10,13	51,30,37	26,20,19	46,47,58	185	149	0.000642435	0.00606298	0.136,0.212,0.221	0.313,0.255,0.209	-0.069
7543	17350	Mlh1	NC_000075.7	-	111068786	111068939	111068790	111068939	111064974	111065083	7543	4,4,5	14,10,24	0,1,0	19,9,19	153	149	0.000645386	0.00607817	0.218,0.28,0.169	0.0,0.098,0.0	0.19
2882	67636	Etfrf1	NC_000072.7	+	145156875	145157202	145156875	145157126	145160247	145160510	2882	17,11,16	4,2,5	12,17,22	0,0,0	225	149	0.000678862	0.00638018	0.738,0.785,0.679	1.0,1.0,1.0	-0.266
7094	14728	Lilrb4a	NC_000076.7	+	51370888	51370989	51370888	51370941	51372089	51372155	7094	2,5,4	2,7,4	0,0,6	10,5,8	197	149	0.000695177	0.00651998	0.431,0.351,0.431	0.0,0.0,0.362	0.284
7287	74330	Dnajc14	NC_000076.7	+	128641544	128641595	128641544	128641583	128642036	128643489	7287	0,8,0	0,0,10	0,0,0	0,3,2	161	149	0.000713434	0.00667739	NA,1.0,0.0	NA,0.0,0.0	0.5
7884	74732	Stx11	NC_000076.7	-	12839743	12840003	12839858	12840003	12815726	12817727	7884	1,1,5	4,0,0	7,4,9	0,0,2	264	149	0.000725376	0.00677516	0.124,1.0,1.0	1.0,1.0,0.717	-0.198
3929	72462	Rrp1b	NC_000083.7	+	32264902	32265203	32264902	32264985	32266647	32266705	3929	8,7,3	12,6,8	5,6,3	11,12,16	367	149	0.000727624	0.00678217	0.213,0.321,0.132	0.156,0.169,0.071	0.09
1708	66869	Zfp869	NC_000074.7	-	70169034	70169546	70169417	70169546	70166951	70167059	1708	16,21,17	0,1,9	9,17,17	1,3,8	532	149	0.000745449	0.00691985	1.0,0.855,0.346	0.716,0.613,0.373	0.166
4493	234915	Cep126	NC_000075.7	-	8104653	8112192	8112080	8112192	8103318	8103517	4493	109140155	0,3,4	125,93,92	3,8,4	7576	149	0.000745064	0.00691985	1.0,0.479,0.432	0.45,0.186,0.311	0.321
1087	18286	Odf2	NC_000068.8	+	29783455	29783581	29783455	29783524	29791088	29791259	1087	43,58,44	0,20,9	31,33,32	14,4,15	206	149	0.000764482	0.00708201	1.0,0.677,0.78	0.616,0.856,0.607	0.126
6498	53627	Porcn	NC_000086.8	-	8064444	8065391	8065305	8065391	8064213	8064324	6498	10,7,10	0,7,5	2,0,4	1,5,4	1010	149	0.000796884	0.00735584	1.0,0.129,0.228	0.228,0.0,0.129	0.333
7621	53609	Clasrp	NC_000073.7	-	19318704	19318748	19318708	19318748	19318394	19318455	7621	9,10,8	10,4,9	3,5,6	9,6,10	153	149	0.000797288	0.00735584	0.467,0.709,0.464	0.245,0.448,0.369	0.193
5687	106794	Dhx57	NC_000083.7	-	80572349	80572638	80572504	80572638	80571376	80571431	5687	8,22,9	12,10,12	8,5,0	16,8,21	304	149	0.000811357	0.00747042	0.246,0.519,0.269	0.197,0.234,0.0	0.201
81	68055	Dmac2l	NC_000078.7	+	69771718	69772328	69771718	69771788	69784724	69784835	81	76,94,77	14,12,11	80100115	21,1,9	689	149	0.000841448	0.00773176	0.54,0.629,0.602	0.452,0.956,0.734	-0.124
6247	19395	Rasgrp2	NC_000085.7	+	6453461	6454125	6453461	6453593	6454329	6454480	6247	110,90,111	22,8,18	91,83,105	16,22,22	681	149	0.000847781	0.00777419	0.522,0.711,0.574	0.554,0.452,0.511	0.097
3892	56174	Nagk	NC_000072.7	+	83770809	83772356	83770809	83772230	83773888	83773973	3892	4,25,13	2,0,0	7,5,6	0,0,6	275	149	0.000857107	0.00784383	0.52,1.0,1.0	1.0,1.0,0.351	0.056
4166	68379	Ciz1	NC_000068.8	+	32260875	32261125	32260875	32261113	32261260	32261420	4166	0,8,8	3,14,21	15,5,14	11,7,6	161	149	0.00086791	0.00792668	0.0,0.346,0.261	0.558,0.398,0.683	-0.344
6701	22130	Ttf1	NC_000068.8	+	28964585	28964820	28964585	28964813	28969400	28969490	6701	6,7,10	4,3,0	14,7,7	3,1,0	156	149	0.000878991	0.00801173	0.589,0.69,1.0	0.817,0.87,1.0	-0.136
8231	57438	Marchf7	NC_000068.8	+	60075555	60077856	60075555	60075604	60078233	60079555	8231	514442322	44,52,64	347335320	33,7,20	2401	149	0.000887265	0.0080709	0.42,0.345,0.238	0.395,0.748,0.498	-0.213
6861	75538	Fam71e1	NC_000073.7	+	44146338	44146488	44146338	44146457	44146926	44147057	6861	1,1,3	0,0,2	4,2,1	8,0,1	180	149	0.0008924	0.00810135	1.0,1.0,0.554	0.293,1.0,0.453	0.269
833	215113	Slc43a2	NC_000077.7	+	75421943	75423034	75421943	75422567	75423413	75423614	833	4,6,17	2,4,0	5,19,16	0,0,0	616	149	0.000939732	0.00851397	0.326,0.266,1.0	1.0,1.0,1.0	-0.469
3329	24099	Tnfsf13b	NC_000074.7	+	10071372	10071487	10071372	10071429	10081309	10081422	3329	4,2,0	0,0,0	1,0,1	1,1,0	207	149	0.000944166	0.00852498	1.0,1.0,NA	0.419,0.0,1.0	0.527
3610	66566	Ntpcr	NC_000074.7	+	126462806	126462969	126462806	126462964	126464061	126464158	3610	39,27,21	23,5,8	28,42,40	5,11,11	154	149	0.000946259	0.00852498	0.621,0.839,0.717	0.844,0.787,0.779	-0.078
836	215113	Slc43a2	NC_000077.7	+	75421943	75422604	75421943	75422567	75423413	75423614	836	8,1,0	2,4,0	3,11,10	0,0,0	186	149	0.000946592	0.00852498	0.762,0.167,NA	1.0,1.0,1.0	-0.535
4398	56526	Septin6	NC_000086.8	-	36205707	36205869	36205734	36205869	36198036	36198133	4398	28,22,20	6,6,3	9,13,6	0,0,0	176	149	0.000953529	0.00857041	0.798,0.756,0.849	1.0,1.0,1.0	-0.199
6782	76539	Fam204a	NC_000085.7	-	60214741	60215133	60215075	60215133	60209485	60209736	6782	16,92,71	5,9,20	100,68,78	13,10,9	483	149	0.00100991	0.00905924	0.497,0.759,0.523	0.704,0.677,0.728	-0.11
7178	66090	Ypel3	NC_000073.7	+	126376134	126376394	126376134	126376375	126376942	126377125	7178	0,0,2	0,4,8	4,1,1	0,6,3	168	149	0.00102128	0.00914309	NA,0.0,0.181	1.0,0.129,0.228	-0.362
3629	107817	Jmjd6	NC_000077.7	-	116731235	116731371	116731273	116731371	116730663	116730752	3629	4,9,5	0,0,0	4,1,4	1,6,0	187	149	0.00107964	0.00964651	1.0,1.0,1.0	0.761,0.117,1.0	0.374
450	20520	Slc22a5	NC_000077.7	-	53766821	53766989	53766834	53766989	53765760	53765932	450	12,5,0	40,11,12	2,0,1	28,25,32	162	149	0.00119438	0.0106506	0.216,0.295,0.0	0.062,0.0,0.028	0.14
6454	74549	Mau2	NC_000074.7	-	70476260	70476347	70476263	70476347	70475269	70475319	6454	36,39,20	29,39,37	50,18,28	17,18,25	152	149	0.00120219	0.0106992	0.549,0.495,0.346	0.742,0.495,0.523	-0.123
5183	224023	Klhl22	NC_000082.7	+	17577484	17577570	17577484	17577558	17582247	17582510	5183	2,1,7	11,5,7	6,3,0	12,20,14	161	149	0.00122298	0.010863	0.144,0.156,0.481	0.316,0.122,0.0	0.114
7455	18983	Cnot7	NC_000074.7	-	40954232	40955368	40955329	40955368	40953792	40953954	7455	161,72,77	5,2,0	46,45,69	2,2,1	1246	149	0.00125545	0.0111295	0.794,0.811,1.0	0.733,0.729,0.892	0.084
2467	378466	Gm10033	NC_000074.7	-	69847984	69848191	69848092	69848191	69827957	69828084	2467	0,3,5	0,6,7	2,3,1	6,1,0	257	149	0.00135209	0.0119628	NA,0.225,0.293	0.162,0.635,1.0	-0.34
7399	20698	Sphk1	NC_000077.7	+	116424795	116425144	116424795	116424999	116425674	116425827	7399	3,1,0	7,1,2	2,1,7	2,0,3	294	149	0.00136535	0.0120566	0.178,0.336,0.0	0.336,1.0,0.542	-0.455
5033	101706	Numa1	NC_000073.7	+	101583177	101583382	101583177	101583336	101626586	101626657	5033	21,32,23	7,0,0	5,17,31	6,4,1	195	149	0.00137039	0.0120776	0.696,1.0,1.0	0.389,0.765,0.959	0.194
4449	68510	Ints1	NC_000071.7	-	139739203	139739328	139739215	139739328	139738466	139738580	4449	3,11,13	29,23,38	10,22,14	40,30,33	161	149	0.00146127	0.0128535	0.087,0.307,0.24	0.188,0.404,0.282	-0.08
2209	19296	Pvt1	NC_000081.7	+	62114022	62114150	62114022	62114146	62114282	62114410	2209	3,9,5	1,1,1	5,0,1	2,1,1	153	149	0.00146896	0.0128961	0.745,0.898,0.83	0.709,0.0,0.493	0.424
1367	72137	Wdsub1	NC_000068.8	-	59712744	59712950	59712821	59712950	59708473	59708894	1367	12,16,19	13,0,5	15,14,12	9,0,1	226	149	0.00149693	0.0131162	0.378,1.0,0.715	0.524,1.0,0.888	-0.106
4599	66231	Thoc7	NC_000080.7	+	8512131	8512303	8512131	8512283	8515106	8515224	4599	8,2,7	0,1,5	12,7,11	4,0,0	169	149	0.00153754	0.0134201	1.0,0.638,0.552	0.726,1.0,1.0	-0.179
5903	67705	1810058I24Rik	NC_000072.7	+	35229644	35229980	35229644	35229717	35237344	35237398	5903	189130164	0,232,216	121134142	141113155	412	149	0.00153517	0.0134201	1.0,0.169,0.215	0.237,0.3,0.249	0.199
3963	19273	Ptpru	NC_000070.7	-	131507385	131507483	131507394	131507483	131507173	131507290	3963	2,12,10	7,1,2	4,1,3	2,1,3	158	149	0.00154909	0.013495	0.212,0.919,0.825	0.654,0.485,0.485	0.111
2998	232879	Zbtb45	NC_000073.7	-	12743344	12745212	12743692	12745212	12740950	12742256	2998	11,13,6	1,7,9	13,16,29	3,4,6	497	149	0.001568	0.0136335	0.767,0.358,0.167	0.565,0.545,0.592	-0.137
3276	244373	Erlin2	NC_000074.7	+	27513846	27514193	27513846	27513934	27515084	27515206	3276	44,34,23	26,19,20	20,28,27	18,26,26	408	149	0.00157355	0.0136555	0.382,0.395,0.296	0.289,0.282,0.275	0.076
2845	407823	Baz2b	NC_000068.8	-	59737782	59738093	59737887	59738093	59737259	59737395	2845	49,73,60	8,10,0	42,46,52	3,0,0	254	149	0.00161375	0.0139776	0.782,0.811,1.0	0.891,1.0,1.0	-0.099
7580	20454	St3gal5	NC_000072.7	+	72074591	72074978	72074591	72074766	72105247	72105371	7580	3,14,23	44,71,50	34,26,22	50,59,79	361	149	0.00161863	0.0139931	0.027,0.075,0.16	0.219,0.154,0.103	-0.071
4259	77254	Yif1b	NC_000073.7	+	28937881	28938036	28937881	28937988	28943494	28943727	4259	48,71,78	23,8,14	76,70,85	15,8,10	197	149	0.00165011	0.0142381	0.612,0.87,0.808	0.793,0.869,0.865	-0.079
2261	217716	Mlh3	NC_000078.7	-	85317202	85317418	85317247	85317418	85312925	85316248	2261	0,1,0	2,0,1	3,0,0	1,0,0	194	149	0.00178807	0.0153991	0.0,1.0,0.0	0.697,NA,NA	-0.364
4586	17957	Napb	NC_000068.8	-	148543028	148545065	148544980	148545065	148542292	148542397	4586	42,38,18	2,1,0	32,14,26	0,2,2	2101	149	0.00181812	0.0156283	0.598,0.729,1.0	1.0,0.332,0.48	0.172
2189	66126	Elof1	NC_000075.7	-	22027950	22028491	22028232	22028491	22025103	22025239	2189	19,2,15	1,2,1	7,5,8	5,2,3	431	149	0.00189584	0.0162654	0.868,0.257,0.838	0.326,0.464,0.48	0.231
5012	74528	Mgme1	NC_000068.8	+	144112823	144112992	144112823	144112934	144113834	144114404	5012	13,14,15	3,3,4	6,5,7	5,6,7	207	149	0.00193758	0.0165922	0.757,0.771,0.73	0.463,0.375,0.419	0.334
867	69080	Gmppa	NC_000067.7	+	75412579	75412837	75412579	75412655	75413421	75413482	867	12,7,14	0,13,13	9,13,10	14,11,13	331	149	0.00194391	0.0166149	1.0,0.195,0.326	0.224,0.347,0.257	0.231
800	232811	Kmt5c	NC_000073.7	+	4743125	4743817	4743125	4743238	4744778	4744980	800	17,27,55	2,5,4	49,33,47	7,7,17	728	149	0.00198545	0.016938	0.635,0.525,0.738	0.589,0.491,0.361	0.152
1177	23989	Med24	NC_000077.7	-	98620197	98620245	98620206	98620245	98619610	98619813	1177	9,31,34	2,21,13	35,30,29	20,0,8	158	149	0.00200495	0.0170723	0.809,0.582,0.712	0.623,1.0,0.774	-0.098
7977	20397	Sgpl1	NC_000076.7	-	60983363	60983463	60983394	60983463	60982036	60982110	7977	6,13,12	1,3,1	4,10,7	5,1,4	180	149	0.00209477	0.0178036	0.832,0.782,0.909	0.398,0.892,0.592	0.214
4288	73582	Camkmt	NC_000083.7	+	85702029	85703391	85702029	85702093	85709853	85709920	4288	4,5,12	4,0,0	1,0,1	0,1,1	1447	149	0.00211803	0.0179676	0.093,1.0,1.0	1.0,0.0,0.093	0.333
6663	107035	Fbxo38	NC_000084.7	-	62647865	62648618	62648090	62648618	62647376	62647400	6663	22,74,66	0,0,0	47,89,59	3,3,10	374	149	0.00218493	0.0185004	1.0,1.0,1.0	0.862,0.922,0.702	0.171
1749	30050	Fbxw2	NC_000068.8	-	34715691	34716082	34715973	34716082	34712569	34713079	1749	19,12,15	96,68,104	23,21,25	38,62,74	431	149	0.00219896	0.0185845	0.064,0.057,0.047	0.173,0.105,0.105	-0.072
739	68734	Ppp4r3a	NC_000078.7	-	101019687	101019843	101019726	101019843	101017789	101017921	739	21,5,23	60,31,43	7,1,13	34,26,31	188	149	0.00229712	0.0193779	0.217,0.113,0.298	0.14,0.03,0.249	0.07
2027	68127	B230217C12Rik	NC_000077.7	+	97732139	97732390	97732139	97732373	97733009	97734263	2027	1,0,0	0,2,0	1,1,0	0,0,0	166	149	0.00240275	0.0202314	1.0,0.0,NA	1.0,1.0,NA	-0.5
317	27366	Txnl4a	NC_000084.7	+	80250040	80250276	80250040	80250161	80250368	80250558	317	0,6,1	2,0,2	4,0,0	0,0,7	264	149	0.00245857	0.0206629	0.0,1.0,0.22	1.0,NA,0.0	-0.093
4904	69940	Exoc1	NC_000071.7	+	76685544	76685737	76685544	76685704	76689897	76690085	4904	2,4,3	0,9,16	2,1,0	13,0,6	182	149	0.0024708	0.0207273	1.0,0.267,0.133	0.112,1.0,0.0	0.096
6841	15547	Trmt2a	NC_000082.7	+	18066746	18067162	18066746	18067120	18067349	18067897	6841	6,11,10	0,0,3	8,13,9	0,9,0	191	149	0.00249053	0.0208542	1.0,1.0,0.722	1.0,0.53,1.0	0.064
789	50776	Polg2	NC_000077.7	-	106669784	106670363	106669909	106670363	106668260	106668387	789	21,7,11	0,8,1	24,18,18	1,0,0	274	149	0.00251236	0.0209982	1.0,0.322,0.857	0.929,1.0,1.0	-0.25
1883	69066	1810010H24Rik	NC_000077.7	+	106919188	106919536	106919188	106919383	106920410	106921269	1883	4,3,10	3,1,7	3,2,0	3,1,7	302	149	0.00263002	0.0219411	0.397,0.597,0.413	0.33,0.497,0.0	0.193
3805	68294	Mfsd10	NC_000071.7	-	34794270	34794557	34794442	34794557	34793937	34794130	3805	4,16,10	0,3,3	8,11,8	7,2,0	321	149	0.00275541	0.0229448	1.0,0.712,0.607	0.347,0.719,1.0	0.084
2931	52397	Zfp644	NC_000071.7	-	106843002	106843565	106843508	106843565	106814650	106814711	2931	128,106,98	1,1,1	105,57,108	1,2,5	655	149	0.00277078	0.0230305	0.967,0.96,0.957	0.96,0.866,0.831	0.076
1879	229877	Rap1gds1	NC_000069.7	-	138675664	138675736	138675668	138675736	138671628	138671757	1879	1,0,1	0,1,1	0,0,0	1,0,3	153	149	0.00279186	0.0231632	1.0,0.0,0.493	0.0,NA,0.0	0.498
4217	78412	Cyren	NC_000072.7	-	34854509	34855000	34854834	34855000	34853473	34853706	4217	33,32,29	0,10,6	11,15,23	3,13,5	474	149	0.0028238	0.0233854	1.0,0.501,0.603	0.535,0.266,0.591	0.237
2708	77613	Prss36	NC_000073.7	-	127533526	127533795	127533561	127533795	127532738	127533004	2708	3,5,1	7,4,5	0,0,0	5,3,3	184	149	0.00285996	0.0235734	0.258,0.503,0.139	0.0,0.0,0.0	0.3
2988	79221	Hdac9	NC_000078.7	-	34481861	34481988	34481867	34481988	34479496	34479618	2988	37,41,55	16,18,25	33,19,26	8,6,5	155	149	0.00285563	0.0235734	0.69,0.686,0.679	0.799,0.753,0.833	-0.11
743	11733	Ank1	NC_000074.7	+	23622112	23622499	23622112	23622487	23622577	23622650	743	0,4,0	0,4,0	1,0,5	1,1,0	161	149	0.00286211	0.0235734	NA,0.481,NA	0.481,0.0,1.0	-0.013
7722	20408	Sh3gl3	NC_000073.7	+	81917487	81919005	81917487	81917560	81919980	81920124	7722	2,0,4	1,0,0	2,0,0	0,0,0	1594	149	0.00290499	0.0238831	0.158,NA,1.0	1.0,NA,NA	-0.421
6850	72836	Pot1b	NC_000083.7	-	55971501	55972783	55972647	55972783	55971316	55971405	6850	29,25,15	4,2,4	21,13,10	5,0,3	1295	149	0.00299064	0.0245428	0.455,0.59,0.301	0.326,1.0,0.277	-0.086
1897	241066	Carf	NC_000067.7	+	60144469	60144593	60144469	60144586	60148485	60148608	1897	4,0,0	0,0,2	0,0,0	3,0,1	156	149	0.00305496	0.0250252	1.0,NA,0.0	0.0,NA,0.0	0.5
311	70802	Pwwp2a	NC_000077.7	+	43577183	43577264	43577183	43577252	43595360	43606882	311	2,2,0	7,0,3	2,2,1	2,0,1	161	149	0.00306632	0.025073	0.209,1.0,0.0	0.481,1.0,0.481	-0.251
5760	268564	Zbtb1	NC_000078.7	+	76431999	76435414	76431999	76433913	76441717	76443729	5760	255195221	7,5,8	186171170	2,2,6	1650	149	0.00319009	0.026038	0.767,0.779,0.714	0.894,0.885,0.719	-0.079
6321	66258	Mrps17	NC_000071.7	+	129792747	129792958	129792747	129792922	129793790	129793930	6321	15,13,7	0,0,2	9,3,13	3,2,0	185	149	0.00337478	0.027496	1.0,1.0,0.738	0.707,0.547,1.0	0.161
4094	72053	Tmub2	NC_000077.7	+	102175776	102176544	102175776	102175914	102178133	102178697	4094	108102107	7,11,5	97,94,74	22,13,11	779	149	0.00347618	0.0282712	0.747,0.639,0.804	0.458,0.58,0.563	0.196
5353	22720	Zfp62	NC_000077.7	+	49094384	49095037	49094384	49094995	49103521	49103603	5353	7,0,2	0,0,0	3,2,3	5,4,0	191	149	0.00348643	0.0283038	1.0,NA,1.0	0.319,0.281,1.0	0.467
5337	67136	Kbtbd4	NC_000068.8	+	90735083	90735253	90735083	90735156	90736009	90736627	5337	14,88,63	12,5,11	74,63,68	3,4,6	246	149	0.00351156	0.0284568	0.414,0.914,0.776	0.937,0.905,0.873	-0.204
4204	229615	Pias3	NC_000069.7	+	96610841	96610975	96610841	96610944	96611054	96611223	4204	32,41,23	3,0,2	10,12,15	1,3,3	180	149	0.00361368	0.0292321	0.898,1.0,0.905	0.892,0.768,0.805	0.113
7081	70508	Bbx	NC_000082.7	-	50252473	50252752	50252604	50252752	50249272	50249344	7081	46,32,48	29,27,31	35,18,32	36,23,28	280	149	0.00375809	0.0303461	0.458,0.387,0.452	0.341,0.294,0.378	0.095
2365	71910	Plpp5	NC_000074.7	+	26210293	26210402	26210293	26210362	26210581	26210672	2365	15,33,48	0,5,12	34,13,24	8,8,11	189	149	0.00379813	0.0306148	1.0,0.839,0.759	0.77,0.562,0.632	0.211
746	67622	Mxra7	NC_000077.7	-	116701605	116701693	116701613	116701693	116697397	116698794	746	0,0,0	4,0,0	3,1,0	2,0,0	157	149	0.00385233	0.0309965	0.0,NA,NA	0.587,1.0,NA	-0.793
372	20602	Ncor2	NC_000071.7	-	125096882	125097110	125097023	125097110	125095874	125096054	372	38,45,37	54,41,39	30,33,45	71,64,76	290	149	0.00396689	0.0318617	0.266,0.361,0.328	0.178,0.209,0.233	0.112
5465	83486	Rbm5	NC_000075.7	-	107647647	107648201	107647759	107648201	107646759	107646825	5465	1,19,10	1,1,0	3,4,3	1,1,2	261	149	0.00411292	0.0329762	0.363,0.916,1.0	0.631,0.695,0.461	0.164
2293	70729	Nos1ap	NC_000067.7	-	170151479	170155266	170155086	170155266	170147990	170148156	2293	225104111	10,7,15	95,97,99	16,10,5	3756	149	0.00414779	0.033197	0.472,0.371,0.227	0.191,0.278,0.44	0.054
620	192196	Luc7l2	NC_000072.7	+	38546866	38546944	38546866	38546940	38547444	38547539	620	6,9,10	2,3,9	14,6,8	0,2,2	153	149	0.00426505	0.0340367	0.745,0.745,0.52	1.0,0.745,0.796	-0.177
6267	75387	Sirt4	NC_000071.7	-	115618242	115618584	115618289	115618584	115617660	115617854	6267	1,4,0	2,0,0	1,0,1	0,0,0	196	149	0.00426774	0.0340367	0.275,1.0,NA	1.0,NA,1.0	-0.363
1954	75420	Secisbp2	NC_000079.7	+	51832869	51833026	51832869	51832917	51833768	51833989	1954	43,34,33	2,7,2	46,41,36	1,0,0	258	149	0.00432473	0.0344307	0.925,0.737,0.905	0.964,1.0,1.0	-0.132
3789	100072	Camta1	NC_000070.7	-	151192627	151194743	151192819	151194743	151173286	151173438	3789	10,30,23	18,12,16	35,23,23	9,6,7	341	149	0.00449838	0.0357503	0.195,0.522,0.386	0.63,0.626,0.589	-0.247
7690	209224	Enox2	NC_000086.8	-	48375721	48375781	48375732	48375781	48257517	48257661	7690	7,16,14	0,8,14	18,10,13	2,4,4	160	149	0.00456954	0.0362522	1.0,0.651,0.482	0.893,0.7,0.752	-0.071
439	53357	Pla2g6	NC_000081.7	-	79187601	79187802	79187773	79187802	79186818	79186897	439	1,0,2	3,0,2	0,0,3	0,1,0	321	149	0.00463911	0.0366118	0.134,NA,0.317	NA,0.0,1.0	-0.274
6920	74648	S100pbp	NC_000070.7	-	129082865	129083269	129083164	129083269	129077393	129077510	6920	1,1,3	4,0,3	2,2,3	3,4,1	448	149	0.00463323	0.0366118	0.077,1.0,0.25	0.181,0.143,0.499	0.168
826	215113	Slc43a2	NC_000077.7	+	75421943	75423240	75421943	75422567	75423413	75423614	826	9,17,22	2,4,0	14,36,19	0,0,0	822	149	0.00463026	0.0366118	0.449,0.435,1.0	1.0,1.0,1.0	-0.372
1287	213948	Atg9b	NC_000071.7	-	24592654	24593441	24592686	24593441	24592384	24592541	1287	0,0,0	1,0,2	1,0,1	0,0,1	181	149	0.00466073	0.0367184	0.0,NA,0.0	1.0,NA,0.452	-0.726
8173	231086	Hadhb	NC_000071.7	+	30361199	30365046	30361199	30363663	30368666	30368741	8173	258357473	6,5,14	419481579	29,23,11	1532	149	0.00468477	0.0368437	0.807,0.874,0.767	0.584,0.67,0.837	0.119
7626	75316	Taf1d	NC_000075.7	+	15226678	15226772	15226678	15226736	15228184	15228274	7626	3,3,3	0,6,0	0,0,1	0,0,2	185	149	0.00472038	0.0370595	1.0,0.287,1.0	NA,NA,0.287	0.475
1158	103737	Pex12	NC_000077.7	-	83189537	83189803	83189665	83189803	83189141	83189379	1158	24,26,23	0,5,2	28,19,23	2,4,4	277	149	0.00485354	0.038039	1.0,0.737,0.861	0.883,0.719,0.756	0.08
1777	212712	Satb2	NC_000067.7	-	57008790	57009039	57008811	57009039	56987237	56987414	1777	0,0,0	1,1,4	2,0,0	0,0,1	170	149	0.00497625	0.0389333	0.0,0.0,0.0	1.0,NA,0.0	-0.5
5714	22691	Zscan2	NC_000073.7	+	80510678	80511082	80510678	80510825	80512912	80513419	5714	13,13,6	2,12,10	14,0,3	6,7,6	406	149	0.00501954	0.0392043	0.705,0.284,0.18	0.461,0.0,0.155	0.184
3064	20719	Serpinb6a	NC_000079.7	-	34119555	34119777	34119601	34119777	34115454	34115629	3064	74,44,41	14,20,10	39,21,23	20,13,16	195	149	0.00503094	0.0392258	0.802,0.627,0.758	0.598,0.552,0.523	0.171
6627	78248	Armcx1	NC_000086.8	+	133619668	133620252	133619668	133619857	133620375	133620474	6627	2,14,4	5,1,5	2,0,10	9,0,1	544	149	0.00513152	0.0399412	0.099,0.793,0.18	0.057,NA,0.733	-0.038
612	69577	Fastkd3	NC_000079.7	+	68730328	68730717	68730328	68730469	68731657	68733121	612	10,24,4	11,10,3	6,9,6	9,11,12	397	149	0.0053479	0.041554	0.254,0.474,0.334	0.2,0.235,0.158	0.156
6023	245050	Gask1a	NC_000075.7	+	121780056	121780346	121780056	121780314	121793802	121795050	6023	1,0,0	2,0,0	1,0,0	0,0,0	181	149	0.00538871	0.0417994	0.292,NA,NA	1.0,NA,NA	-0.708
4596	66231	Thoc7	NC_000080.7	+	8512131	8512283	8512131	8512209	8512582	8512701	4596	2,1,3	1,0,3	4,0,5	0,0,0	223	149	0.0057679	0.0446642	0.572,1.0,0.401	1.0,NA,1.0	-0.342
4253	67444	Ilkap	NC_000067.7	-	91318830	91318919	91318853	91318919	91318328	91318385	4253	5,6,5	34,53,65	0,0,2	49,50,73	172	149	0.00585422	0.0452553	0.113,0.089,0.062	0.0,0.0,0.023	0.08
5440	112403	Dxo	NC_000083.7	+	35055994	35056217	35055994	35056192	35056368	35056730	5440	9,6,2	0,10,8	2,1,4	9,6,5	174	149	0.00599031	0.0462284	1.0,0.339,0.176	0.16,0.125,0.407	0.274
1116	216565	Ehbp1	NC_000077.7	-	22039524	22039668	22039584	22039668	22018358	22018506	1116	29,82,69	3,13,14	81,77,91	35,15,21	209	149	0.00605545	0.0466517	0.873,0.818,0.778	0.623,0.785,0.755	0.102
5701	217827	Nrde2	NC_000078.7	-	100117469	100117593	100117484	100117593	100116075	100116309	5701	23,38,32	6,2,6	30,6,32	9,1,11	164	149	0.00613568	0.0471895	0.777,0.945,0.829	0.752,0.845,0.726	0.076
4208	13018	Ctcf	NC_000074.7	+	106351135	106364196	106351135	106363352	106370147	106370264	4208	46,52,42	11,31,18	55,19,45	40,24,28	993	149	0.00629086	0.0482193	0.386,0.201,0.259	0.171,0.106,0.194	0.125
5467	83486	Rbm5	NC_000075.7	-	107647647	107648201	107647750	107648201	107646759	107646825	5467	1,18,10	0,0,0	2,4,2	2,1,2	252	149	0.00629047	0.0482193	1.0,1.0,1.0	0.372,0.703,0.372	0.518
3444	194908	Pld6	NC_000077.7	-	59678043	59678483	59678047	59678483	59674718	59676051	3444	3,3,1	4,2,0	2,3,1	1,0,0	153	149	0.00630714	0.0482624	0.422,0.594,1.0	0.661,1.0,1.0	-0.215
2807	16590	Kit	NC_000071.7	+	75799624	75799818	75799624	75799806	75801152	75801259	2807	4,1,1	0,4,0	3,2,4	7,0,4	161	149	0.00646108	0.0492739	1.0,0.188,1.0	0.284,1.0,0.481	0.141
3158	20384	Srsf5	NC_000078.7	+	80992272	80992572	80992272	80992446	80993349	80993494	3158	300747805	229832772	465363417	670384534	275	149	0.00646098	0.0492739	0.415,0.327,0.361	0.273,0.339,0.297	0.065
3182	217692	Sipa1l1	NC_000078.7	+	82216896	82217199	82216896	82217184	82281236	82281302	3182	1,0,3	1,0,3	0,2,2	0,0,0	164	149	0.00650783	0.049547	0.476,NA,0.476	NA,1.0,1.0	-0.524
6425	665775	Bod1l	NC_000071.7	-	41973550	41979503	41974342	41979503	41971473	41971538	6425	113179241	0,2,2	179146216	7,0,10	941	149	0.00671628	0.0510483	1.0,0.934,0.95	0.802,1.0,0.774	0.103
4078	227644	Snapc4	NC_000068.8	-	26262742	26262837	26262770	26262837	26260797	26260892	4078	1,8,8	1,2,1	8,2,5	6,3,4	177	149	0.00673583	0.0511111	0.457,0.771,0.871	0.529,0.359,0.513	0.233
533	20353	Sema4c	NC_000067.7	-	36595249	36595862	36595577	36595862	36595012	36595161	533	14,24,8	3,2,1	8,21,23	0,0,2	477	149	0.00678449	0.0513942	0.593,0.789,0.714	1.0,1.0,0.782	-0.229
4400	105246770	Gm42009	NC_000071.7	+	116561113	116563679	116561113	116561480	116563781	116564059	4400	4,8,2	1,1,0	3,8,0	0,0,0	2348	149	0.00680104	0.0514336	0.202,0.337,1.0	1.0,1.0,NA	-0.487
4363	625421	C230062I16Rik	NC_000073.7	+	29655748	29656146	29655748	29656011	29656384	29656459	4363	0,0,1	0,3,0	1,0,2	0,0,2	284	149	0.00686074	0.0517986	NA,0.0,1.0	1.0,NA,0.344	-0.172
4032	654795	Sdr39u1	NC_000080.7	-	56135699	56136762	56136640	56136762	56134741	56135469	4032	317275213	0,3,0	179193256	13,1,0	1090	149	0.00700227	0.0527792	1.0,0.926,1.0	0.653,0.963,1.0	0.103
6769	67367	Paxbp1	NC_000082.7	-	90827303	90827444	90827320	90827444	90824117	90824217	6769	23,24,37	3,6,15	29,24,21	11,15,13	166	149	0.00708649	0.0533253	0.873,0.782,0.689	0.703,0.59,0.592	0.153
4364	625421	C230062I16Rik	NC_000073.7	+	29655748	29656142	29655748	29656011	29656384	29656459	4364	0,0,1	0,3,0	1,0,2	0,0,2	280	149	0.00714992	0.0537133	NA,0.0,1.0	1.0,NA,0.347	-0.173
1739	12331	Cap1	NC_000070.7	-	122779606	122779869	122779625	122779869	122766124	122766249	1739	30,33,32	6,13,29	24,36,39	18,28,22	168	149	0.00739403	0.0554552	0.816,0.692,0.495	0.542,0.533,0.611	0.106
2215	227801	Dennd1a	NC_000068.8	-	37694058	37695212	37695083	37695212	37692026	37692285	2215	34,28,22	21,20,16	54,18,29	12,15,9	1174	149	0.00748289	0.0560289	0.17,0.151,0.149	0.364,0.132,0.29	-0.105
2893	546336	Prrg1	NC_000086.8	-	77627183	77627521	77627309	77627521	77564376	77564427	2893	4,2,5	2,1,2	5,3,5	3,0,0	275	149	0.00772623	0.0577555	0.52,0.52,0.575	0.475,1.0,1.0	-0.287
3270	382252	Bclaf3	NC_000086.8	+	158349423	158350361	158349423	158349538	158350914	158351010	3270	30,29,17	0,1,9	32,20,17	5,3,5	972	149	0.00774599	0.0578078	1.0,0.816,0.225	0.495,0.505,0.343	0.233
831	215113	Slc43a2	NC_000077.7	+	75421943	75422648	75421943	75422604	75423413	75423614	831	0,0,0	8,1,0	7,0,7	3,8,10	193	149	0.00784265	0.0584329	0.0,0.0,NA	0.643,0.0,0.351	-0.331
2576	98403	Zfp451	NC_000067.7	-	33802289	33803650	33803594	33803650	33800625	33801290	2576	59,17,39	1,3,3	21,9,22	5,3,4	1454	149	0.00802254	0.059675	0.858,0.367,0.571	0.301,0.235,0.36	0.3
8245	217344	Rhbdf2	NC_000077.7	-	116495203	116495332	116495208	116495332	116494757	116494876	8245	8,20,16	0,0,0	9,18,15	3,3,5	154	149	0.00812841	0.0603634	1.0,1.0,1.0	0.744,0.853,0.744	0.22
4677	76681	Trim12a	NC_000073.7	-	103964507	103964741	103964617	103964741	103963569	103963849	4677	13,4,0	5,9,10	1,0,3	5,11,7	259	149	0.0082294	0.0610134	0.599,0.204,0.0	0.103,0.0,0.198	0.167
2134	19009	Pou6f1	NC_000081.7	-	100483616	100484006	100483755	100484006	100481911	100482040	2134	8,13,4	3,6,12	9,3,2	9,4,7	288	149	0.00825261	0.0610855	0.58,0.529,0.147	0.341,0.28,0.129	0.169
6261	73182	Pear1	NC_000069.7	-	87670531	87670665	87670566	87670665	87669518	87669588	6261	3,1,5	1,13,11	8,6,4	10,3,10	184	149	0.00829961	0.0613331	0.708,0.059,0.269	0.393,0.618,0.245	-0.073
7275	64656	Mrps23	NC_000077.7	+	88095213	88095406	88095213	88095311	88100678	88100756	7275	1,4,2	9,7,4	2,4,3	6,2,6	244	149	0.00833777	0.0615148	0.064,0.259,0.234	0.169,0.55,0.234	-0.132
2902	115487718	Gm51857	NC_000077.7	+	33923957	33932495	33923957	33931110	33937031	33937245	2902	12,3,4	0,1,0	0,2,0	0,0,0	1534	149	0.00836707	0.0616306	1.0,0.226,1.0	NA,1.0,NA	-0.258
5333	67725	Nudt13	NC_000080.7	+	20345155	20347699	20345155	20345334	20354020	20354160	5333	98,77,89	3,1,1	79,83,72	0,2,1	2514	149	0.00858553	0.0631371	0.659,0.82,0.841	1.0,0.711,0.81	-0.067
4765	236732	Rbm10	NC_000086.8	+	20511675	20511836	20511675	20511833	20512007	20512105	4765	18,11,14	16,3,4	10,11,14	13,6,8	152	149	0.00874085	0.0641751	0.524,0.782,0.774	0.43,0.642,0.632	0.125
576	244416	Ppp1r3b	NC_000074.7	+	35842912	35843095	35842912	35842959	35851137	35855293	576	15,11,5	6,11,5	5,8,23	8,3,3	285	149	0.00889848	0.0652267	0.567,0.343,0.343	0.246,0.582,0.8	-0.125
1789	104401	Pcnx3	NC_000085.7	-	5733304	5733440	5733334	5733440	5731459	5731620	1789	30,28,24	0,0,4	17,6,13	0,3,5	179	149	0.00905626	0.066276	1.0,1.0,0.833	1.0,0.625,0.684	0.175
8261	269623	Rbm48	NC_000071.7	-	3640891	3641815	3641669	3641815	3640222	3640803	8261	22,22,28	11,14,20	32,22,22	11,10,10	927	149	0.00915664	0.0669026	0.243,0.202,0.184	0.319,0.261,0.261	-0.071
6313	66258	Mrps17	NC_000071.7	+	129792747	129793005	129792747	129792974	129793790	129793930	6313	8,8,5	13,15,11	2,5,1	10,19,15	180	149	0.0092029	0.0671322	0.337,0.306,0.273	0.142,0.179,0.052	0.181
1156	103737	Pex12	NC_000077.7	-	83189542	83189803	83189665	83189803	83189141	83189379	1156	8,10,8	0,5,2	9,6,9	2,4,4	272	149	0.00923719	0.0672741	1.0,0.523,0.687	0.711,0.451,0.552	0.165
5813	319885	Zcchc7	NC_000070.7	+	44761849	44762755	44761849	44762474	44893532	44893570	5813	25,15,20	48,40,30	18,22,34	24,35,33	430	149	0.00968591	0.0704289	0.153,0.115,0.188	0.206,0.179,0.263	-0.064
3238	19014	Med1	NC_000077.7	-	98046002	98049295	98049154	98049295	98042979	98043951	3238	110514201328	7,2,20	130011331442	2,3,5	3301	149	0.0097803	0.0706615	0.877,0.97,0.75	0.967,0.945,0.929	-0.081
3906	52856	Mtg2	NC_000068.8	+	179726243	179726382	179726243	179726375	179727172	179727695	3906	35,37,40	4,5,2	60,40,56	0,0,2	156	149	0.009775	0.0706615	0.893,0.876,0.95	1.0,1.0,0.964	-0.082
5850	69694	Tatdn1	NC_000081.7	-	58795677	58795817	58795753	58795817	58793122	58793266	5850	26,3,10	29,27,25	9,5,5	24,23,42	225	149	0.00974179	0.0706615	0.373,0.069,0.209	0.199,0.126,0.073	0.084
8024	21767	Tex264	NC_000075.7	-	106562833	106563151	106563033	106563151	106562127	106562194	8024	62,50,30	5,32,24	50,50,46	41,33,59	349	149	0.00977282	0.0706615	0.841,0.4,0.348	0.342,0.393,0.25	0.201
1243	29808	Mga	NC_000068.8	+	119716771	119728104	119716771	119727827	119733086	119734214	1243	7,13,18	2,23,0	20,11,15	20,20,41	426	149	0.0101636	0.0732006	0.55,0.165,1.0	0.259,0.161,0.113	0.394
3019	27393	Mrpl39	NC_000082.7	-	84531151	84531501	84531156	84531501	84529229	84529369	3019	1,0,0	4,0,2	0,0,2	0,0,1	154	149	0.0101641	0.0732006	0.195,NA,0.0	NA,NA,0.659	-0.561
6426	665775	Bod1l	NC_000071.7	-	41973550	41979503	41974342	41979503	41971473	41971547	6426	99164221	2,10,5	166134199	7,13,16	941	149	0.0103955	0.0747485	0.887,0.722,0.875	0.79,0.62,0.663	0.137
3339	21887	Tle3	NC_000075.7	+	61316556	61316698	61316556	61316689	61317217	61317417	3339	3,8,7	8,19,3	5,5,8	15,14,16	158	149	0.010461	0.0751006	0.261,0.284,0.688	0.239,0.252,0.32	0.141
3267	74931	4930481A15Rik	NC_000085.7	+	5467421	5468279	5467421	5467494	5472148	5472875	3267	197140184	1,4,10	118117132	0,0,0	934	149	0.0107707	0.0772017	0.969,0.848,0.746	1.0,1.0,1.0	-0.146
4108	235633	Als2cl	NC_000075.7	+	110719152	110719247	110719152	110719232	110719368	110719530	4108	5,4,1	0,2,0	2,1,3	1,0,3	164	149	0.0107973	0.0772694	1.0,0.645,1.0	0.645,1.0,0.476	0.175
4267	69635	Dapk1	NC_000079.7	+	60908448	60909698	60908448	60909677	60910170	60911005	4267	7,4,1	9,3,6	8,10,10	6,4,4	170	149	0.0112438	0.080338	0.405,0.539,0.127	0.539,0.687,0.687	-0.281
6115	56752	Aldh9a1	NC_000067.7	+	167183240	167183764	167183240	167183375	167184098	167184295	6115	204143227	51,36,45	37,56,61	23,19,24	538	149	0.0113608	0.0810465	0.526,0.524,0.583	0.308,0.449,0.413	0.154
469	101592	Efl1	NC_000073.7	+	82297821	82297886	82297821	82297857	82298733	82298839	469	5,3,2	5,8,11	3,2,4	0,4,3	178	149	0.0117601	0.0837631	0.456,0.239,0.132	1.0,0.295,0.527	-0.332
497	56215	Acin1	NC_000080.7	-	54886978	54888374	54886988	54888374	54885544	54885587	497	0,1,0	6,10,24	1,0,5	3,3,4	159	149	0.0118597	0.0843398	0.0,0.086,0.0	0.238,0.0,0.539	-0.23
2143	269033	4930503L19Rik	NC_000084.7	-	70600401	70600556	70600405	70600556	70597032	70597135	2143	18,4,2	6,9,2	3,4,4	7,12,6	153	149	0.0118895	0.0844193	0.745,0.302,0.493	0.294,0.245,0.394	0.202
7896	109019	Nabp1	NC_000067.7	-	51517459	51517558	51517530	51517558	51516636	51516775	7896	5,47,33	0,0,0	36,57,35	0,0,16	220	149	0.0119104	0.0844351	1.0,1.0,1.0	1.0,1.0,0.597	0.134
6479	68112	Entr1	NC_000068.8	-	26278597	26279077	26278927	26279077	26277567	26277683	6479	8,9,14	6,2,2	11,14,13	3,3,2	479	149	0.0119535	0.084608	0.293,0.583,0.685	0.533,0.592,0.669	-0.078
2153	15260	Hira	NC_000082.7	+	18714652	18714796	18714652	18714677	18715203	18715314	2153	0,4,3	0,0,4	12,7,2	0,0,0	268	149	0.0121831	0.086099	NA,1.0,0.294	1.0,1.0,1.0	-0.353
5849	69694	Tatdn1	NC_000081.7	-	58805131	58805587	58805527	58805587	58800532	58800598	5849	29,37,24	13,19,19	21,33,30	21,21,40	545	149	0.0122427	0.0863854	0.379,0.347,0.257	0.215,0.301,0.17	0.099
6545	70233	Cd2bp2	NC_000073.7	-	126795086	126795249	126795100	126795249	126794532	126794639	6545	0,3,1	1,1,0	2,0,0	1,0,0	163	149	0.0123637	0.0871035	0.0,0.733,1.0	0.646,NA,NA	-0.068
3251	97287	Mtmr14	NC_000072.7	+	113232776	113232882	113232776	113232804	113233983	113234057	3251	0,1,3	0,0,0	0,2,0	0,2,0	227	149	0.0130384	0.0917141	NA,1.0,1.0	NA,0.396,NA	0.604
5603	74734	Rhoh	NC_000071.7	+	66020322	66021224	66020322	66020493	66048895	66049014	5603	0,0,2	0,0,0	2,2,2	0,0,1	880	149	0.0131485	0.0923454	NA,NA,1.0	1.0,1.0,0.253	0.249
5823	20300	Ccl25	NC_000074.7	+	4377756	4377893	4377756	4377850	4403882	4404000	5823	2,3,2	4,0,0	3,3,0	1,3,2	192	149	0.0132602	0.0929482	0.28,1.0,1.0	0.7,0.437,0.0	0.381
6106	50762	Fbxo6	NC_000070.7	-	148236070	148236382	148236286	148236382	148233835	148234123	6106	26,58,59	9,4,4	89,47,69	2,5,2	365	149	0.0132754	0.0929482	0.541,0.855,0.858	0.948,0.793,0.934	-0.14
305	70762	Dclk2	NC_000069.7	-	86699301	86699418	86699375	86699418	86693457	86696797	305	0,2,2	0,0,2	1,0,2	0,0,0	223	149	0.0135044	0.0944058	NA,1.0,0.401	1.0,NA,1.0	-0.299
1130	228880	Zmynd8	NC_000068.8	-	165687663	165688159	165687940	165688159	165684683	165684797	1130	96,71,73	55,74,63	35,27,46	52,55,56	426	149	0.013624	0.0950949	0.379,0.251,0.288	0.191,0.147,0.223	0.119
3859	232976	Zfp574	NC_000073.7	+	24776231	24776907	24776231	24776811	24778959	24782917	3859	18,9,7	13,11,7	13,11,1	0,13,21	245	149	0.0138007	0.0961805	0.457,0.332,0.378	1.0,0.34,0.028	-0.067
6431	234594	Cnot1	NC_000074.7	-	96481592	96481739	96481607	96481739	96479653	96479778	6431	91,113,75	82,50,67	71,90,104	45,41,57	164	149	0.013925	0.0968974	0.502,0.672,0.504	0.589,0.666,0.624	-0.067
5602	14069	F8	NC_000086.8	-	74253969	74254146	74253975	74254146	74213949	74216616	5602	4,1,1	0,2,2	8,3,2	3,0,1	155	149	0.0140195	0.0974054	1.0,0.325,0.325	0.719,1.0,0.658	-0.242
5796	54613	St3gal6	NC_000082.7	-	58343438	58344035	58343679	58344035	58327810	58327977	5796	12,88,62	0,4,8	84,79,101	19,9,10	390	149	0.0141357	0.0980626	1.0,0.894,0.748	0.628,0.77,0.794	0.15
2699	77613	Prss36	NC_000073.7	-	127532738	127533452	127533310	127533452	127532542	127532664	2699	55,44,35	3,3,2	39,23,26	2,0,0	721	149	0.0150642	0.104344	0.791,0.752,0.783	0.801,1.0,1.0	-0.158
5093	69612	Kansl2	NC_000081.7	-	98422339	98422593	98422441	98422593	98418198	98418306	5093	239,102,82	75,47,42	77,85,112	20,25,16	251	149	0.0152841	0.105705	0.654,0.563,0.537	0.696,0.669,0.806	-0.139
977	23789	Coro1b	NC_000085.7	+	4198609	4198735	4198609	4198728	4199340	4199543	977	38,34,41	0,7,10	38,34,25	17,20,0	156	149	0.0153359	0.105902	1.0,0.823,0.797	0.681,0.619,1.0	0.107
7318	107239	Carns1	NC_000085.7	-	4222623	4223219	4222957	4223219	4222144	4222234	7318	32,37,28	5,4,0	35,25,38	7,10,7	483	149	0.0158439	0.109243	0.664,0.74,1.0	0.607,0.435,0.626	0.245
7502	234854	Cdk10	NC_000074.7	+	123951579	123951707	123951579	123951669	123953085	123953158	7502	10,17,9	4,2,1	20,14,20	0,1,3	187	149	0.0158741	0.109285	0.666,0.871,0.878	1.0,0.918,0.842	-0.115
2596	26457	Slc27a1	NC_000074.7	+	72021985	72022485	72021985	72022076	72022839	72022956	2596	158372397	10,27,20	213247226	44,26,15	558	149	0.0159898	0.109915	0.808,0.786,0.841	0.564,0.717,0.801	0.118
6427	14727	Lilr4b	NC_000076.7	+	51356707	51356854	51356707	51356849	51357001	51357037	6427	2,4,11	0,1,3	7,7,11	0,14,6	154	149	0.0162662	0.111645	1.0,0.795,0.78	1.0,0.326,0.639	0.203
1205	76799	Tmem234	NC_000070.7	+	129495199	129495418	129495199	129495326	129495987	129496054	1205	12,7,7	2,2,3	3,2,9	0,0,0	241	149	0.016334	0.111941	0.788,0.684,0.591	1.0,1.0,1.0	-0.312
2501	12412	Cbx1	NC_000077.7	+	96697441	96697620	96697441	96697590	96698628	96698975	2501	10,14,31	2,4,0	10,19,7	6,5,0	179	149	0.0165054	0.112945	0.806,0.744,1.0	0.581,0.76,1.0	0.07
7730	237412	Gm4924	NC_000076.7	+	82190074	82190493	82190074	82190215	82204404	82204531	7730	14,10,13	8,6,4	6,14,9	3,0,1	427	149	0.0167742	0.114611	0.379,0.368,0.531	0.411,1.0,0.758	-0.297
2147	319955	Ercc6	NC_000080.7	+	32268701	32270162	32268701	32268860	32274531	32274667	2147	52,34,30	11,7,12	12,16,20	13,7,14	1451	149	0.0171896	0.117273	0.327,0.333,0.204	0.087,0.19,0.128	0.153
2186	66126	Elof1	NC_000075.7	-	22028061	22028491	22028232	22028491	22025103	22025239	2186	14,2,9	1,2,1	7,3,6	5,2,3	320	149	0.0177869	0.121165	0.867,0.318,0.807	0.395,0.411,0.482	0.235
4218	78412	Cyren	NC_000072.7	-	34852390	34852547	34852471	34852547	34848705	34851630	4218	2,2,5	5,4,3	2,0,1	9,3,8	230	149	0.0180981	0.1231	0.206,0.245,0.519	0.126,0.0,0.075	0.256
8252	20587	Smarcb1	NC_000076.7	-	75752606	75752745	75752633	75752745	75750897	75751027	8252	19,26,18	12,16,23	14,13,12	34,11,24	176	149	0.0184887	0.125568	0.573,0.579,0.399	0.258,0.5,0.297	0.165
4140	67870	Enoph1	NC_000071.7	+	100187852	100188161	100187852	100188132	100206998	100207100	4140	22,24,28	5,2,1	26,30,25	2,1,0	178	149	0.0190136	0.12894	0.786,0.909,0.959	0.916,0.962,1.0	-0.075
8114	67014	Riox2	NC_000082.7	+	59309707	59309929	59309707	59309796	59311567	59311657	8114	8,10,7	44,25,33	2,2,2	24,19,30	282	149	0.0191755	0.129843	0.088,0.174,0.101	0.042,0.053,0.034	0.078
1932	100683	Trrap	NC_000071.7	+	144776210	144776439	144776210	144776406	144777147	144777413	1932	48,23,19	50,16,37	12,10,12	23,19,23	182	149	0.0193105	0.130562	0.44,0.541,0.296	0.299,0.301,0.299	0.126
7218	57312	Mrps31	NC_000074.7	+	22914362	22914525	22914362	22914436	22919196	22919685	7218	4,0,0	0,1,1	3,0,6	0,3,0	238	149	0.0199374	0.1346	1.0,0.0,0.0	1.0,0.0,1.0	-0.333
4222	627049	Zfp800	NC_000072.7	-	28260950	28261377	28261294	28261377	28260716	28260835	4222	16,14,14	12,1,7	6,5,10	2,5,6	493	149	0.0202952	0.136811	0.287,0.809,0.377	0.476,0.232,0.335	0.143
2702	77613	Prss36	NC_000073.7	-	127533526	127533799	127533561	127533799	127532542	127532664	2702	3,5,1	12,8,4	0,0,0	2,5,5	184	149	0.0204412	0.137591	0.168,0.336,0.168	0.0,0.0,0.0	0.224
6013	100504734	Gm16794	NC_000075.7	-	95836332	95845300	95836680	95845300	95824097	95828153	6013	0,5,3	0,1,2	1,6,3	2,0,0	497	149	0.0208596	0.140199	NA,0.6,0.31	0.13,1.0,1.0	-0.255
2975	80911	Acox3	NC_000071.7	+	35740377	35740940	35740377	35740663	35741219	35741319	2975	20,11,4	14,7,12	5,2,3	12,11,8	426	149	0.0209416	0.140542	0.333,0.355,0.104	0.127,0.06,0.116	0.163
4506	232933	Ccdc61	NC_000073.7	-	18627691	18627774	18627703	18627774	18627109	18627273	4506	2,13,13	5,0,3	12,10,12	10,7,15	161	149	0.0210281	0.140913	0.27,1.0,0.8	0.526,0.569,0.425	0.183
1095	235493	Fam214a	NC_000075.7	+	74860161	74860341	74860161	74860290	74860995	74861112	1095	12,36,32	7,5,12	48,68,32	10,11,8	200	149	0.0212436	0.142147	0.561,0.843,0.665	0.781,0.822,0.749	-0.094
5355	22720	Zfp62	NC_000077.7	+	49104416	49105481	49104416	49104469	49105890	49109612	5355	128,83,73	38,23,37	73,71,60	47,35,41	1161	149	0.0213663	0.142757	0.302,0.317,0.202	0.166,0.207,0.158	0.097
999	208266	Dot1l	NC_000076.7	+	80609539	80609602	80609539	80609574	80613389	80613445	999	17,36,32	4,1,1	54,48,69	11,10,11	177	149	0.0217577	0.145158	0.782,0.968,0.964	0.805,0.802,0.841	0.089
2722	18186	Nrp1	NC_000074.7	+	129207365	129207470	129207365	129207449	129214377	129214437	2722	65191165	0,31,29	253141182	57,38,43	170	149	0.022003	0.146579	1.0,0.844,0.833	0.796,0.765,0.788	0.109
3662	66826	Taz	NC_000086.8	+	73332056	73332625	73332056	73332119	73332710	73332788	3662	85,72,69	14,8,4	34,42,76	0,6,0	655	149	0.02207	0.146809	0.58,0.672,0.797	1.0,0.614,1.0	-0.188
1861	100090	Zbtb48	NC_000070.7	-	152110675	152111516	152110844	152111516	152110234	152110476	1861	8,5,4	6,8,2	1,12,2	5,7,5	318	149	0.0221748	0.14729	0.385,0.227,0.484	0.086,0.445,0.158	0.136
3495	54216	Pcdh7	NC_000071.7	+	58070497	58070714	58070497	58070690	58099508	58099604	3495	28,35,61	0,12,10	49,31,41	0,1,5	173	149	0.0223554	0.148181	1.0,0.715,0.84	1.0,0.964,0.876	-0.095
3542	13209	Ddx6	NC_000075.7	+	44516188	44516249	44516188	44516224	44518419	44518889	3542	23,31,43	16,0,0	0,38,36	11,5,0	174	149	0.0223743	0.148181	0.552,1.0,1.0	0.0,0.867,1.0	0.228
6493	107476	Acaca	NC_000077.7	+	84070505	84071019	84070505	84070752	84086263	84086513	6493	0,0,0	0,5,2	1,3,4	0,6,0	416	149	0.0224556	0.148502	NA,0.0,0.0	1.0,0.152,1.0	-0.717
2750	232339	Ankrd26	NC_000072.7	-	118517396	118517510	118517411	118517510	118516807	118516836	2750	0,3,1	5,3,5	4,3,4	3,2,6	164	149	0.0229512	0.151558	0.0,0.476,0.154	0.548,0.577,0.377	-0.291
3226	108652	Slc35b3	NC_000079.7	-	39144385	39144513	39144407	39144513	39139624	39139912	3226	0,4,7	9,10,9	2,2,1	13,1,11	171	149	0.0230204	0.151794	0.0,0.258,0.404	0.118,0.635,0.073	-0.055
179	382010	Cep44	NC_000074.7	-	57002765	57003156	57003097	57003156	57002259	57002419	179	3,5,5	0,0,2	4,10,15	1,2,0	481	149	0.0230629	0.151853	1.0,1.0,0.436	0.553,0.608,1.0	0.092
6645	329470	Accs	NC_000068.8	-	93679889	93680336	93680109	93680336	93678261	93678531	6645	5,7,5	1,7,3	2,13,6	2,2,0	369	149	0.0231341	0.152101	0.669,0.288,0.402	0.288,0.724,1.0	-0.218
7684	233575	Pgap2	NC_000073.7	+	101885654	101885761	101885654	101885749	101886328	101886437	7684	67,51,28	23,25,27	72,60,61	22,18,33	161	149	0.023364	0.15339	0.729,0.654,0.49	0.752,0.755,0.631	-0.088
2443	68497	Arel1	NC_000078.7	-	84988504	84988731	84988534	84988731	84986933	84987171	2443	90,57,92	10,9,12	70,65,55	19,8,13	179	149	0.0234557	0.153769	0.882,0.841,0.865	0.754,0.871,0.779	0.061
1619	11899	Astn1	NC_000067.7	+	158338524	158338716	158338524	158338692	158348013	158348098	1619	0,0,0	2,1,0	4,0,0	1,2,0	173	149	0.0235355	0.154069	0.0,0.0,NA	0.775,0.0,NA	-0.388
7198	70385	Spdl1	NC_000077.7	-	34720848	34721726	34721551	34721726	34716189	34716366	7198	3,0,1	0,0,1	0,0,0	4,0,1	852	149	0.023645	0.154563	1.0,NA,0.149	0.0,NA,0.0	0.575
1415	320816	Ankrd16	NC_000068.8	+	11784487	11784895	11784487	11784708	11786287	11786330	1415	11,12,16	2,3,8	5,5,9	2,8,9	336	149	0.0239303	0.156202	0.709,0.639,0.47	0.526,0.217,0.307	0.256
4637	208777	Sned1	NC_000067.7	+	93187366	93187529	93187366	93187501	93189370	93189496	4637	1,1,1	1,0,2	7,9,17	2,8,6	177	149	0.0240582	0.156811	0.457,1.0,0.296	0.747,0.486,0.705	-0.062
6505	20853	Stau1	NC_000068.8	-	166791619	166791749	166791627	166791749	166789471	166791279	6505	0,1,1	0,3,0	1,1,3	1,0,0	157	149	0.0246573	0.160485	NA,0.24,1.0	0.487,1.0,1.0	-0.209
2080	20589	Ighmbp2	NC_000085.7	-	3312347	3315665	3314810	3315665	3311974	3312144	2080	32,19,30	6,2,4	12,14,16	2,3,14	2612	149	0.024994	0.162443	0.233,0.351,0.3	0.255,0.21,0.061	0.119
1175	23989	Med24	NC_000077.7	-	98620129	98620245	98620206	98620245	98619610	98619813	1175	7,33,33	2,21,13	27,33,26	20,0,8	226	149	0.0253665	0.164392	0.698,0.509,0.626	0.471,1.0,0.682	-0.107
8074	226352	Epb41l5	NC_000067.7	-	119576083	119576489	119576146	119576489	119570206	119570388	8074	1,2,3	6,0,1	0,0,0	8,6,2	212	149	0.0253424	0.164392	0.105,1.0,0.678	0.0,0.0,0.0	0.594
8014	269061	Cpsf7	NC_000085.7	+	10510656	10510829	10510656	10510802	10512467	10512882	8014	73,62,50	38,34,32	43,48,72	14,11,21	176	149	0.0262718	0.170016	0.619,0.607,0.569	0.722,0.787,0.744	-0.153
4583	75099	Lysmd4	NC_000073.7	+	66872291	66872786	66872291	66872377	66873356	66873639	4583	24,28,29	0,10,1	49,38,68	0,0,6	558	149	0.0267315	0.172744	1.0,0.428,0.886	1.0,1.0,0.752	-0.146
1137	72881	Zdhhc4	NC_000071.7	-	143314853	143314993	143314920	143314993	143314145	143314325	1137	8,2,5	17,17,10	1,1,3	11,17,16	216	149	0.0267876	0.17286	0.245,0.075,0.256	0.059,0.039,0.115	0.121
3618	270156	Nkapd1	NC_000075.7	-	50527957	50528764	50528527	50528764	50526782	50526859	3618	31,25,31	2,17,13	31,19,17	10,12,13	719	149	0.0281855	0.181622	0.763,0.234,0.331	0.391,0.247,0.213	0.159
6512	72446	Prr5l	NC_000068.8	-	101627765	101628052	101627816	101628052	101602474	101602753	6512	6,0,0	3,2,3	1,2,4	2,2,0	200	149	0.0284698	0.183194	0.598,0.0,0.0	0.271,0.427,1.0	-0.367
2400	21429	Ubtf	NC_000077.7	-	102210736	102214738	102211443	102214738	102210149	102210418	2400	3,10,4	0,0,0	18,2,4	0,0,4	856	149	0.0286671	0.184201	1.0,1.0,1.0	1.0,1.0,0.148	0.284
5653	12667	Chrd	NC_000082.7	+	20555013	20555192	20555013	20555133	20555658	20555815	5653	4,2,1	4,8,5	0,0,1	12,2,1	208	149	0.0300267	0.192664	0.417,0.152,0.125	0.0,0.0,0.417	0.092
78	56709	Dnajb12	NC_000076.7	+	59732171	59732323	59732171	59732269	59733312	59735118	78	31,45,56	30,45,52	21,27,33	51,41,56	203	149	0.0303604	0.19453	0.431,0.423,0.441	0.232,0.326,0.302	0.145
520	83704	Slc12a9	NC_000071.7	-	137331709	137336752	137332147	137336752	137330717	137330940	520	23,22,24	5,0,0	16,3,10	4,4,0	587	149	0.0312358	0.199856	0.539,1.0,1.0	0.504,0.16,1.0	0.292
3900	228608	Smox	NC_000068.8	+	131333826	131334403	131333826	131333956	131353903	131354137	3900	0,10,7	18,25,20	16,20,12	28,17,24	596	149	0.0313899	0.200559	0.0,0.091,0.08	0.125,0.227,0.111	-0.097
2172	209225	Zfp710	NC_000073.7	+	79676809	79677833	79676809	79677825	79730796	79732288	2172	7,5,5	4,0,2	13,5,16	17,11,7	157	149	0.031484	0.200877	0.624,1.0,0.703	0.421,0.301,0.684	0.307
6436	67249	Tbc1d19	NC_000071.7	+	53987796	53988830	53987796	53987842	53990311	53990387	6436	58,28,29	62,47,37	51,47,34	21,20,28	1137	149	0.0331259	0.211055	0.109,0.072,0.093	0.241,0.235,0.137	-0.113
1979	80517	Herpud2	NC_000075.7	-	25021706	25022030	25021735	25022030	25020735	25020850	1979	136,92,105	8,18,9	73,91,80	23,11,12	178	149	0.0332942	0.21183	0.934,0.811,0.907	0.727,0.874,0.848	0.068
6759	622675	Zfp827	NC_000074.7	+	79912804	79912987	79912804	79912982	79914777	79914810	6759	0,1,1	5,15,15	0,4,3	10,8,5	154	149	0.0334661	0.212625	0.0,0.061,0.061	0.0,0.326,0.367	-0.19
6632	14760	Gpr19	NC_000072.7	-	134873820	134874176	134874124	134874176	134864592	134864748	6632	19,9,10	2,7,11	3,8,3	6,8,6	453	149	0.0335274	0.212716	0.758,0.297,0.23	0.141,0.248,0.141	0.252
6622	18823	Plp1	NC_000086.8	+	135732701	135732963	135732701	135732858	135734016	135734185	6622	4,5,7	7,2,0	1,3,3	2,3,4	254	149	0.0336338	0.213093	0.251,0.595,1.0	0.227,0.37,0.306	0.314
5489	72113	Adck1	NC_000078.7	+	88335104	88336140	88335104	88335250	88338464	88338548	5489	96,43,51	26,28,23	34,25,47	36,28,28	1039	149	0.0339629	0.214877	0.346,0.18,0.241	0.119,0.114,0.194	0.113
7127	106821	Oard1	NC_000083.7	+	48717027	48717400	48717027	48717265	48717855	48717932	7127	38,59,63	5,5,5	44,39,72	0,4,5	284	149	0.0352926	0.222979	0.799,0.861,0.869	1.0,0.836,0.883	-0.063
965	20347	Sema3b	NC_000075.7	-	107483754	107484133	107483952	107484133	107482645	107482786	965	29,62,40	3,6,5	12,20,32	9,4,3	347	149	0.036055	0.227478	0.806,0.816,0.775	0.364,0.682,0.821	0.177
5977	27632	Nelfe	NC_000083.7	+	35069366	35069564	35069366	35069438	35069886	35069969	5977	0,3,0	2,16,11	9,3,0	5,7,14	275	149	0.0361526	0.227777	0.0,0.092,0.0	0.494,0.188,0.0	-0.197
2382	320790	Chd7	NC_000070.7	+	8859042	8859857	8859042	8859486	8862489	8862711	2382	21,8,10	7,17,29	5,3,7	23,26,20	520	149	0.0362273	0.22793	0.462,0.119,0.09	0.059,0.032,0.091	0.163
5330	269870	Zfp446	NC_000073.7	+	12713811	12714920	12713811	12713906	12715772	12715854	5330	48,36,26	7,2,1	18,7,15	3,6,1	1163	149	0.0366068	0.229998	0.468,0.698,0.769	0.435,0.13,0.658	0.237
6315	66258	Mrps17	NC_000071.7	+	129792747	129793025	129792747	129792958	129793790	129793930	6315	12,21,12	5,4,2	11,8,15	2,0,2	216	149	0.0369063	0.231239	0.623,0.784,0.805	0.791,1.0,0.838	-0.139
7295	110153	Vis1	NC_000068.8	+	45132894	45132960	45132894	45132956	45168986	45169197	7295	2,0,0	0,5,0	2,0,0	2,0,1	153	149	0.0368828	0.231239	1.0,0.0,NA	0.493,NA,0.0	0.254
5535	74011	Slc25a27	NC_000083.7	-	43958462	43958675	43958582	43958675	43957911	43958014	5535	6,6,0	3,3,5	3,4,1	0,3,0	269	149	0.0377104	0.23595	0.526,0.526,0.0	1.0,0.425,1.0	-0.458
2151	320595	Phf8	NC_000086.8	+	150303638	150304433	150303638	150304315	150305383	150305572	2151	0,7,0	14,16,27	2,10,10	24,18,15	267	149	0.0377681	0.235986	0.0,0.196,0.0	0.044,0.237,0.271	-0.119
3583	269587	Epb41	NC_000070.7	-	131682838	131682889	131682853	131682889	131663049	131663178	3583	18,31,33	6,15,38	36,32,34	54,39,47	164	149	0.0378998	0.236482	0.732,0.652,0.441	0.377,0.427,0.397	0.208
4737	13196	Asap1	NC_000081.7	-	64030730	64030853	64030766	64030853	64024678	64024779	4737	15,29,11	20,49,53	13,32,35	40,23,30	185	149	0.0383881	0.2392	0.377,0.323,0.143	0.207,0.528,0.484	-0.125
6823	16197	Il7r	NC_000081.7	-	9511098	9511365	9511196	9511365	9510251	9510345	6823	0,0,0	1,0,1	0,0,2	0,1,1	247	149	0.0389595	0.242427	0.0,NA,0.0	NA,0.0,0.547	-0.274
6908	22590	Xpa	NC_000070.7	-	46184280	46184453	46184287	46184453	46183117	46183235	6908	6,4,5	20,35,32	1,3,0	27,20,22	156	149	0.039309	0.244266	0.223,0.098,0.13	0.034,0.125,0.0	0.097
1761	102638195	2700003A03Rik	NC_000067.7	+	90210782	90211577	90210782	90210860	90218345	90218492	1761	15,6,6	0,4,1	10,16,18	5,0,0	866	149	0.0395109	0.245011	1.0,0.205,0.508	0.256,1.0,1.0	-0.181
2038	11784	Apba2	NC_000073.7	+	64151382	64152001	64151382	64151566	64203394	64203519	2038	0,4,0	0,1,1	1,2,1	0,0,0	584	149	0.0395371	0.245011	NA,0.505,0.0	1.0,1.0,1.0	-0.748
4327	14236	Foxn2	NC_000083.7	+	88748131	88748561	88748131	88748312	88770140	88770691	4327	4,16,4	4,18,7	4,5,6	25,17,23	398	149	0.0401614	0.24854	0.272,0.25,0.176	0.057,0.099,0.089	0.151
1296	98758	Hnrnpf	NC_000072.7	+	117883742	117884169	117883742	117883800	117894430	117894559	1296	127186184	30,48,33	172213269	21,32,56	518	149	0.0403868	0.249594	0.549,0.527,0.616	0.702,0.657,0.58	-0.082
1428	11848	Rhoa	NC_000075.7	+	108183995	108184275	108183995	108184142	108192506	108192581	1428	46,8,21	0,0,0	30,28,28	6,0,4	282	149	0.0408723	0.25225	1.0,1.0,1.0	0.725,1.0,0.787	0.163
8251	16826	Ldb2	NC_000071.7	-	44636434	44636586	44636440	44636586	44633834	44633977	8251	1,1,1	0,0,0	2,0,3	0,0,4	155	149	0.0412516	0.254244	1.0,1.0,1.0	1.0,NA,0.419	0.29
5031	70047	Trnt1	NC_000072.7	+	106746098	106746217	106746098	106746152	106746790	106746964	5031	22,30,18	0,14,19	17,12,30	14,12,19	214	149	0.0417017	0.256669	1.0,0.599,0.397	0.458,0.41,0.524	0.201
3419	207818	Smagp	NC_000081.7	-	100534439	100534821	100534629	100534821	100534067	100534136	3419	23,28,53	7,31,21	36,44,56	16,12,17	339	149	0.0418583	0.257283	0.591,0.284,0.526	0.497,0.617,0.591	-0.101
414	226043	Cbwd1	NC_000085.7	-	24938680	24939024	24938747	24939024	24935267	24935354	414	4,28,21	4,40,41	34,28,32	27,30,47	216	149	0.0420557	0.258147	0.408,0.326,0.261	0.465,0.392,0.32	-0.061
3536	13209	Ddx6	NC_000075.7	+	44516188	44516445	44516188	44516281	44518419	44518889	3536	2,14,14	0,6,18	21,8,7	21,24,0	313	149	0.0425462	0.260804	1.0,0.526,0.27	0.323,0.137,1.0	0.112
3888	67707	Mrpl24	NC_000069.7	+	87825437	87827012	87825437	87826958	87827109	87827135	3888	0,18,15	0,0,0	11,5,30	0,0,7	203	149	0.0435435	0.266557	NA,1.0,1.0	1.0,1.0,0.759	0.08
1918	210004	B3gntl1	NC_000077.7	-	121563650	121563983	121563806	121563983	121561882	121561999	1918	4,3,5	0,0,0	5,0,0	2,0,0	305	149	0.0439586	0.268735	1.0,1.0,1.0	0.55,NA,NA	0.45
7916	67544	Fam120b	NC_000083.7	+	15622006	15624659	15622006	15623391	15626016	15626197	7916	240127151	27,29,29	95,56,131	18,24,28	1417	149	0.0448258	0.273667	0.483,0.315,0.354	0.357,0.197,0.33	0.089
7038	109674	Ampd2	NC_000069.7	-	107982813	107983020	107982846	107983020	107982564	107982675	7038	5,2,0	1,8,12	0,1,3	4,0,0	182	149	0.0454278	0.276969	0.804,0.17,0.0	0.0,1.0,1.0	-0.342
3260	71687	Tmem25	NC_000075.7	-	44710378	44710544	44710477	44710544	44709960	44710054	3260	1,2,4	0,2,1	4,0,8	7,6,2	248	149	0.046229	0.281475	1.0,0.375,0.706	0.256,0.0,0.706	0.373
1138	72881	Zdhhc4	NC_000071.7	-	143314432	143314993	143314853	143314993	143314145	143314325	1138	32,37,19	8,0,5	19,25,26	0,1,3	570	149	0.0469115	0.285247	0.511,1.0,0.498	1.0,0.867,0.694	-0.184
1131	228880	Zmynd8	NC_000068.8	-	165687519	165688159	165687940	165688159	165684683	165684797	1131	146,100,94	55,74,63	50,36,77	52,55,56	570	149	0.0472218	0.286442	0.41,0.261,0.281	0.201,0.146,0.264	0.114
2	56805	Zbtb33	NC_000086.8	+	37278669	37278959	37278669	37278785	37281091	37285923	2	1,44,35	15,15,15	25,21,37	7,10,7	323	149	0.0472344	0.286442	0.03,0.575,0.518	0.622,0.492,0.709	-0.233
2307	22701	Zfp41	NC_000081.7	+	75488532	75488877	75488532	75488669	75489892	75491540	2307	0,1,3	0,5,2	4,0,0	10,0,3	357	149	0.0474684	0.287476	NA,0.077,0.385	0.143,NA,0.0	0.16
3154	53422	Ybx2	NC_000077.7	+	69830063	69830518	69830063	69830153	69830699	69830984	3154	109,82,65	6,17,11	56,62,72	15,9,22	514	149	0.0479097	0.289761	0.84,0.583,0.631	0.52,0.666,0.487	0.127
5449	320683	Zfp629	NC_000073.7	-	127214115	127214444	127214254	127214444	127211838	127211945	5449	0,30,8	40,39,35	16,26,15	26,27,43	288	149	0.0483774	0.29181	0.0,0.285,0.106	0.241,0.333,0.153	-0.112
6851	72836	Pot1b	NC_000083.7	-	55979712	55979893	55979830	55979893	55976739	55976896	6851	1,2,0	8,3,8	2,2,1	2,3,4	267	149	0.0483397	0.29181	0.065,0.271,0.0	0.358,0.271,0.122	-0.138
661	223838	Adamts20	NC_000081.7	-	94228361	94228526	94228375	94228526	94227796	94227961	661	2,0,0	2,0,0	0,0,4	1,0,0	163	149	0.0498879	0.300522	0.478,NA,NA	0.0,NA,1.0	-0.022

## Sheet: HypoTHvC_MXE
HypoTH v/s Control Group_MXE.TargetAndJunctionCount
ID	GeneID	geneSymbol	chr	strand	1stExonStart_0base	1stExonEnd	2ndExonStart_0base	2ndExonEnd	upstreamES	upstreamEE	downstreamES	downstreamEE	ID	IC_SAMPLE_1	SC_SAMPLE_1	IC_SAMPLE_2	SC_SAMPLE_2	IncFormLen	SkipFormLen	PValue	FDR	IncLevel1	IncLevel2	IncLevelDifference
3768	22138	Ttn	NC_000068.8	-	76688247	76688331	76691440	76691521	76649079	76649160	76691766	76691853	3768	260246247	50,0,273	66,67,72	280254343	230	233	0	0	0.84,1.0,0.478	0.193,0.211,0.175	0.58
3769	22138	Ttn	NC_000068.8	-	76688247	76688331	76733406	76733970	76649079	76649160	76736597	76736876	3769	477334064057	50,4,268	121410871386	280250343	713	233	0	0	0.969,0.996,0.832	0.586,0.587,0.569	0.352
3814	22138	Ttn	NC_000068.8	-	76680913	76680988	76682400	76682481	76649079	76649160	76688247	76688331	3814	125598574	0,0,15	241224302	42,0,80	230	224	1.74142e-254	2.10363e-251	1.0,1.0,0.974	0.848,1.0,0.786	0.113
2862	338363	Tmem241	NC_000084.7	-	12238910	12239060	12251460	12251507	12237155	12237237	12254437	12254598	2862	0,2,5	4,6,7	4,3,9	0,0,2	196	299	2.92983e-187	2.65443e-184	0.0,0.337,0.521	1.0,1.0,0.873	-0.672
523	194401	Mical3	NC_000072.7	-	120946315	120946453	120948711	120948801	120939715	120939826	120950363	120950608	523	51,45,57	25,13,11	44,41,52	0,1,3	239	287	1.65662e-162	1.20072e-159	0.71,0.806,0.862	1.0,0.98,0.954	-0.185
2216	24131	Ldb3	NC_000080.7	-	34293674	34293878	34294946	34294969	34291669	34291684	34300551	34300627	2216	0,1,3	55168161	16,16,11	89118164	172	353	6.25213e-158	3.77629e-155	0.0,0.012,0.037	0.27,0.218,0.121	-0.187
3817	22138	Ttn	NC_000068.8	-	76662444	76662528	76674548	76674623	76662131	76662218	76677731	76677815	3817	2,9,16	1,3,13	0,0,3	8,4,10	224	233	8.83463e-142	4.57382e-139	0.675,0.757,0.561	0.0,0.0,0.238	0.585
3231	229487	Gatb	NC_000069.7	+	85544230	85544364	85559587	85559722	85526130	85526320	85561030	85562931	3231	91,63,67	33,64,74	52,40,38	68,88,119	283	284	3.19027e-138	1.44519e-135	0.735,0.497,0.476	0.434,0.313,0.243	0.239
2779	78611	Btbd19	NC_000070.7	-	116978394	116978526	116978610	116978679	116978167	116978293	116979415	116979475	2779	2,0,1	2,4,1	1,0,4	0,1,0	218	281	1.18969e-119	4.79048e-117	0.563,0.0,0.563	1.0,0.0,1.0	-0.291
2494	234214	Sorbs2	NC_000074.7	+	46235838	46235997	46236579	46236663	46228625	46228740	46238305	46238362	2494	98953896	1157639626	632455600	423322438	308	233	1.11016e-114	4.0232e-112	0.06,0.53,0.52	0.531,0.517,0.509	-0.149
2085	53886	Cdkl2	NC_000071.7	-	92185026	92185221	92187096	92187295	92181437	92181616	92190657	92198479	2085	7,13,23	54,34,24	29,30,26	13,20,28	348	344	7.13225e-110	2.34975e-107	0.114,0.274,0.486	0.688,0.597,0.479	-0.297
2804	19215	Ptgds	NC_000068.8	-	25358999	25359139	25359571	25359746	25358844	25358921	25360021	25360141	2804	2367771071	159318802607	9828301040	154514681997	324	289	5.75876e-104	1.73914e-101	0.117,0.269,0.268	0.362,0.335,0.317	-0.12
2907	320267	Fubp3	NC_000068.8	+	31473166	31473272	31482474	31482508	31462654	31462965	31484854	31484904	2907	12,33,27	13,8,8	32,32,40	5,1,1	255	183	1.38245e-98	3.85384e-96	0.398,0.747,0.708	0.821,0.958,0.966	-0.297
2495	234214	Sorbs2	NC_000074.7	+	46235838	46235997	46238305	46238362	46228625	46228740	46243012	46243062	2495	98951895	1003597563	631456601	373317436	308	206	3.02944e-98	7.84193e-96	0.061,0.516,0.515	0.531,0.49,0.48	-0.136
1451	21416	Tcf7l2	NC_000085.7	+	55912961	55913012	55914408	55914481	55912327	55912376	55919865	55922087	1451	8,11,15	3,8,13	3,2,6	27,3,13	200	222	1.00282e-92	2.4228e-90	0.747,0.604,0.562	0.11,0.425,0.339	0.346
4082	17686	Msh3	NC_000079.7	-	92487738	92487959	92489732	92489850	92485656	92485845	92491270	92491513	4082	8,26,27	26,38,31	15,15,24	12,4,7	267	370	2.37592e-92	5.38145e-90	0.299,0.487,0.547	0.634,0.839,0.826	-0.322
1298	102632808	Gm30786	NC_000077.7	-	65535476	65535693	65538373	65538545	65533237	65535085	65539148	65539309	1298	3,2,2	6,5,3	1,4,8	1,0,2	321	366	1.35137e-90	2.8808e-88	0.363,0.313,0.432	0.533,1.0,0.82	-0.415
3820	22138	Ttn	NC_000068.8	-	76728788	76729067	76733406	76733970	76724485	76724767	76736597	76736876	3820	540036924458	475466588	123111051397	260245322	713	428	9.36683e-89	1.7866e-86	0.872,0.826,0.82	0.74,0.73,0.723	0.108
4323	269061	Cpsf7	NC_000085.7	+	10509494	10509560	10509621	10509698	10509144	10509363	10510183	10510287	4323	5,4,13	1,0,1	0,2,1	4,0,2	215	226	9.275e-89	1.7866e-86	0.84,1.0,0.932	0.0,1.0,0.345	0.476
3760	22138	Ttn	NC_000068.8	-	76683948	76684032	76687953	76688034	76682400	76682481	76688247	76688331	3760	0,20,6	1,20,19	0,2,0	5,2,9	230	233	7.64241e-88	1.38481e-85	0.0,0.503,0.242	0.0,0.503,0.0	0.081
3430	17906	Myl2	NC_000071.7	+	122241893	122241998	122242889	122242968	122240758	122240834	122243050	122243099	3430	57934026737667	281043171929739	408443703943201	297312909233951	254	228	2.77529e-83	4.78935e-81	0.156,0.533,0.532	0.552,0.533,0.533	-0.132
1076	14872	Gstt2	NC_000076.7	-	75668494	75668645	75670008	75670715	75668228	75668402	75673048	75673253	1076	26,49,52	59,39,58	54,60,66	42,20,26	856	300	2.11895e-81	3.4905e-79	0.134,0.306,0.239	0.311,0.513,0.471	-0.205
4114	19299	Abcd3	NC_000069.7	-	121579650	121579720	121581628	121581698	121578121	121578219	121585382	121585471	4114	90,74,70	83,36,50	208235210	28,57,54	219	219	1.0552e-77	1.66263e-75	0.52,0.673,0.583	0.881,0.805,0.795	-0.235
1176	13822	Epb41l2	NC_000076.7	+	25366607	25369225	25369464	25369527	25364848	25364991	25371342	25371489	1176	221153192	33,49,44	146,77,143	53,62,82	2767	212	1.23271e-75	1.86139e-73	0.339,0.193,0.251	0.174,0.087,0.118	0.135
2111	108655	Foxp1	NC_000072.7	-	99412176	99412306	99497557	99497693	99285304	99285399	99499508	99499706	2111	2,4,5	53,40,61	7,4,13	35,0,19	285	279	6.25708e-75	9.07026e-73	0.036,0.089,0.074	0.164,1.0,0.401	-0.455
3627	245886	Ankrd27	NC_000073.7	+	35299739	35299850	35300914	35301071	35291176	35291307	35301852	35302007	3627	8,28,12	40,22,19	20,13,20	5,10,11	260	306	8.25579e-75	1.15073e-72	0.191,0.6,0.426	0.825,0.605,0.682	-0.298
3396	100043911	Ppp4r1l-ps	NC_000068.8	-	173441382	173441480	173457275	173458216	173438832	173438980	173501115	173501160	3396	31,19,27	5,0,3	14,5,5	5,6,3	1090	247	2.04694e-74	2.74745e-72	0.584,1.0,0.671	0.388,0.159,0.274	0.478
1356	213084	Cdkl3	NC_000077.7	+	51931387	51931447	51975197	51975317	51924340	51924438	51980415	51980605	1356	0,0,5	1,0,3	1,0,0	1,8,4	209	269	1.20921e-68	1.56506e-66	0.0,NA,0.682	0.563,0.0,0.0	0.153
4080	268859	Rbfox1	NC_000082.7	+	7103341	7103395	7110048	7110141	7094888	7095032	7111933	7111994	4080	9,13,12	14,21,22	70,54,55	34,28,43	203	242	1.60631e-68	2.00733e-66	0.434,0.425,0.394	0.711,0.697,0.604	-0.253
1067	69046	Isca1	NC_000079.7	-	59906703	59906809	59910555	59910609	59903228	59904817	59917437	59917603	1067	151824678	631587640	826715953	564544686	203	255	5.63017e-68	6.80124e-66	0.231,0.638,0.571	0.648,0.623,0.636	-0.156
3767	22138	Ttn	NC_000068.8	-	76688247	76688331	76692693	76692771	76656790	76656886	76693143	76693203	3767	68723142102	61533529	119611441247	668650814	227	233	4.48992e-66	5.24886e-64	0.92,0.817,0.803	0.648,0.644,0.611	0.212
3781	22138	Ttn	NC_000068.8	-	76656790	76656886	76657338	76657422	76649079	76649160	76662131	76662218	3781	25108232	12,4,13	23,20,19	5,10,10	233	245	1.44908e-64	1.64108e-62	0.687,0.966,0.949	0.829,0.678,0.666	0.143
1162	69179	Stimate	NC_000080.7	+	30584836	30584885	30588579	30588701	30547532	30547847	30592707	30592820	1162	5,11,7	30,4,8	17,5,15	3,5,6	198	271	8.61316e-64	9.45882e-62	0.186,0.79,0.545	0.886,0.578,0.774	-0.239
46	19212	Pter	NC_000068.8	+	12979179	12979264	12982970	12983428	12928851	12929009	12985103	12985369	46	0,8,9	81,115,90	38,16,12	143,99,125	234	607	4.53709e-63	4.83601e-61	0.0,0.153,0.206	0.408,0.295,0.199	-0.181
2965	54214	Golga4	NC_000075.7	+	118343247	118343337	118351585	118351651	118335281	118335625	118356077	118356389	2965	156483410	308212174	531454509	163172218	239	215	4.76341e-62	4.93217e-60	0.313,0.672,0.679	0.746,0.704,0.677	-0.154
2617	105689	Mycbp2	NC_000080.7	-	103412201	103412426	103419789	103419930	103411222	103411355	103422267	103422384	2617	130,67,99	92,104,97	57,45,65	96,98,130	290	374	1.30118e-60	1.30985e-58	0.646,0.454,0.568	0.434,0.372,0.392	0.157
739	12817	Col13a1	NC_000076.7	-	61678382	61678460	61679346	61679433	61675856	61675895	61684954	61684990	739	0,2,2	3,1,12	1,0,1	1,0,0	236	227	4.18579e-59	4.09981e-57	0.0,0.658,0.138	0.49,NA,1.0	-0.48
3779	22138	Ttn	NC_000068.8	-	76684730	76684811	76687953	76688034	76681898	76682108	76688247	76688331	3779	0,13,6	0,7,9	0,2,0	0,5,6	230	230	1.34867e-57	1.28621e-55	NA,0.65,0.4	NA,0.286,0.0	0.382
1170	56403	Syncrip	NC_000075.7	-	88343722	88343844	88344288	88344438	88338415	88338782	88345007	88345213	1170	338291325	78235278	245215297	224236312	299	271	5.68705e-57	5.28458e-55	0.797,0.529,0.514	0.498,0.452,0.463	0.142
4366	71268	Lrrfip2	NC_000075.7	+	111009283	111009340	111011886	111011964	111008940	111008988	111013257	111013347	4366	192,63,74	8,11,6	49,52,75	8,21,20	206	227	1.41762e-55	1.28437e-53	0.964,0.863,0.931	0.871,0.732,0.805	0.117
510	106529	Tecr	NC_000074.7	-	84300039	84300084	84300499	84300551	84299848	84299952	84301106	84301157	510	256675556	397331318	714713739	298318330	201	194	9.6835e-54	8.55927e-52	0.384,0.663,0.628	0.698,0.684,0.684	-0.13
1544	52397	Zfp644	NC_000071.7	-	106838536	106838743	106843508	106843565	106814650	106814711	106844397	106844696	1544	6,5,2	14,10,10	5,5,10	5,4,3	206	356	1.79973e-53	1.55291e-51	0.425,0.464,0.257	0.633,0.684,0.852	-0.341
1933	243197	Mfsd7a	NC_000071.7	-	108593316	108593530	108593801	108593960	108593071	108593148	108596583	108598631	1933	5,6,0	8,4,6	0,0,3	1,2,11	308	363	5.49767e-51	4.63339e-49	0.424,0.639,0.0	0.0,0.0,0.243	0.273
3027	83997	Slmap	NC_000080.7	-	26174692	26174755	26180564	26180615	26163729	26163789	26181196	26181365	3027	27,46,56	5,13,24	45,35,33	17,22,53	200	212	1.21904e-50	1.00404e-48	0.851,0.79,0.712	0.737,0.628,0.398	0.197
1252	67095	Trak1	NC_000075.7	+	121193066	121193365	121220922	121221117	121126567	121126899	121260544	121260621	1252	539911852	1138649482	121810791320	635629836	448	344	1.51456e-50	1.21973e-48	0.267,0.519,0.576	0.596,0.568,0.548	-0.117
3780	22138	Ttn	NC_000068.8	-	76684730	76684811	76687953	76688034	76682400	76682481	76688247	76688331	3780	0,20,6	0,16,9	0,2,0	1,4,6	230	230	2.2698e-49	1.7882e-47	NA,0.556,0.4	0.0,0.333,0.0	0.367
4006	19258	Ptpn4	NC_000067.7	-	119693158	119693211	119693607	119693652	119692760	119692881	119711211	119711319	4006	3,1,0	42,18,16	4,3,6	14,8,17	194	202	4.77822e-49	3.68431e-47	0.069,0.055,0.0	0.229,0.281,0.269	-0.218
2069	54325	Elovl1	NC_000070.7	+	118287911	118288102	118288259	118288340	118287692	118287752	118288462	118288519	2069	33,91,87	42,22,16	92,66,75	9,12,15	340	230	2.70633e-48	2.04328e-46	0.347,0.737,0.786	0.874,0.788,0.772	-0.188
3145	80285	Parp9	NC_000082.7	+	35763738	35763880	35767870	35768724	35761402	35761505	35773932	35774148	3145	9,12,26	228168164	23,15,33	154,98,122	291	1003	1.0514e-47	7.77607e-46	0.12,0.198,0.353	0.34,0.345,0.482	-0.165
3571	17996	Neb	NC_000068.8	-	52075282	52075387	52076023	52076128	52073743	52073848	52077422	52077527	3571	7,15,2	0,13,5	0,3,2	4,7,5	254	254	2.53124e-46	1.83464e-44	1.0,0.536,0.286	0.0,0.3,0.286	0.412
1968	269587	Epb41	NC_000070.7	-	131664325	131664775	131682853	131682889	131663049	131663178	131684953	131685130	1968	15,29,49	141209198	76,71,61	199220249	185	599	4.85203e-45	3.44779e-43	0.256,0.31,0.445	0.553,0.511,0.442	-0.165
560	14594	Ggta1	NC_000068.8	-	35304230	35304296	35306483	35306519	35303337	35303439	35312191	35312280	560	6,13,2	18,11,14	2,0,3	14,8,16	185	215	1.80114e-44	1.25526e-42	0.279,0.579,0.142	0.142,0.0,0.179	0.226
4338	94245	Dtnbp1	NC_000079.7	-	45076624	45076768	45084471	45084627	45075554	45075930	45106647	45106670	4338	37268261	252270255	260224264	224207257	305	293	6.61803e-44	4.52524e-42	0.124,0.488,0.496	0.527,0.51,0.497	-0.142
482	67463	Poc5	NC_000079.7	+	96529734	96529852	96530999	96531077	96528095	96528183	96533147	96533338	482	28,9,9	15,12,9	12,6,9	17,18,24	267	227	3.355e-42	2.25158e-40	0.613,0.389,0.46	0.375,0.221,0.242	0.208
405	13528	Dtnb	NC_000078.7	+	3646648	3646862	3667605	3667691	3641905	3641986	3682809	3682964	405	9,2,14	9,20,8	20,9,20	4,15,4	363	235	3.76069e-42	2.47795e-40	0.393,0.061,0.531	0.764,0.28,0.764	-0.274
3818	22138	Ttn	NC_000068.8	-	76662444	76662528	76670576	76670657	76662131	76662218	76677731	76677815	3818	1,14,0	1,3,13	0,4,0	8,4,10	230	233	1.69369e-41	1.09606e-39	0.503,0.825,0.0	0.0,0.503,0.0	0.275
3304	59125	Nek7	NC_000067.7	-	138430308	138430403	138443362	138443470	138426313	138426427	138444265	138444374	3304	237150159	101116119	114118117	127120121	257	244	2.89391e-40	1.83992e-38	0.69,0.551,0.559	0.46,0.483,0.479	0.126
3042	224440	Setd4	NC_000082.7	-	93394248	93394308	93395204	93395553	93393185	93393223	93396099	93396195	3042	7,1,6	2,0,1	2,2,2	5,0,1	498	209	1.18639e-39	7.41288e-38	0.595,1.0,0.716	0.144,1.0,0.456	0.237
1264	102631735	A630039O03Rik	NC_000069.7	+	149166494	149166599	149182859	149183011	149159104	149159163	149183740	149183818	1264	1,1,0	7,0,1	2,0,2	0,3,1	254	301	1.71222e-39	1.05171e-37	0.145,1.0,0.0	1.0,0.0,0.703	-0.186
2727	73516	1700086O06Rik	NC_000084.7	-	38372625	38372804	38373891	38374006	38371457	38372242	38382766	38383251	2727	0,1,2	2,2,1	0,1,2	1,0,0	264	328	2.05977e-39	1.2441e-37	0.0,0.383,0.713	0.0,1.0,1.0	-0.301
4011	268747	Carmil3	NC_000080.7	+	55732261	55732350	55732860	55732955	55732109	55732185	55733180	55733267	4011	4,0,2	4,2,4	2,0,0	1,2,3	238	244	7.97975e-39	4.74075e-37	0.506,0.0,0.339	0.672,0.0,0.0	0.058
520	194401	Mical3	NC_000072.7	-	120943014	120943077	120946315	120946453	120939715	120939826	120950363	120950608	520	25,13,11	63,52,50	0,1,3	36,37,31	287	212	1.51369e-38	8.84775e-37	0.227,0.156,0.14	0.0,0.02,0.067	0.145
2261	18484	Pam	NC_000067.7	-	97862375	97862463	97903509	97903630	97852155	97852241	97904581	97904984	2261	288895781	852595493	605533632	331321417	270	237	1.67399e-38	9.6294e-37	0.229,0.569,0.582	0.616,0.593,0.571	-0.133
2889	232227	Iqsec1	NC_000072.7	-	90641003	90641053	90644881	90645058	90636577	90639937	90645622	90645784	2889	246256181	3,23,26	184178194	41,29,28	326	199	2.24137e-38	1.26918e-36	0.98,0.872,0.81	0.733,0.789,0.809	0.11
3050	14225	Fkbp1a	NC_000068.8	+	151385932	151386060	151387344	151387435	151384737	151384785	151399305	151399418	3050	0,2,2	1,1,0	6,3,6	0,2,3	277	240	1.1166e-37	6.22547e-36	0.0,0.634,1.0	1.0,0.565,0.634	-0.188
4256	66211	Rpl3l	NC_000083.7	+	24947290	24947483	24949842	24950011	24946799	24946860	24951309	24951445	4256	286529477	649489444	701749858	596578683	342	318	4.73306e-37	2.59888e-35	0.291,0.501,0.5	0.522,0.546,0.539	-0.105
1439	53600	Timm23	NC_000080.7	-	31915810	31915904	31920925	31920984	31915359	31915444	31923599	31923848	1439	47289290	220175166	343289335	163174235	208	243	7.56548e-37	4.09213e-35	0.2,0.659,0.671	0.711,0.66,0.625	-0.155
2220	24131	Ldb3	NC_000080.7	-	34291669	34291684	34293674	34293878	34289354	34289524	34294946	34294969	2220	50150159	0,5,4	104127147	12,9,13	353	164	3.73026e-36	1.98801e-34	1.0,0.933,0.949	0.801,0.868,0.84	0.124
1905	327655	Ppip5k1	NC_000068.8	-	121153674	121153857	121158125	121158251	121152135	121152273	121162038	121162129	1905	39,8,20	42,31,28	20,8,21	54,35,76	275	332	2.18211e-35	1.13699e-33	0.529,0.238,0.463	0.309,0.216,0.25	0.152
57	230861	Eif4g3	NC_000070.7	+	137811567	137811681	137814843	137814876	137810224	137810299	137824062	137824242	57	1,5,15	3,15,15	6,7,3	29,36,30	263	182	2.19616e-35	1.13699e-33	0.187,0.187,0.409	0.125,0.119,0.065	0.158
3103	380698	Obscn	NC_000077.7	-	58946202	58946466	58946786	58947050	58945599	58945863	58957891	58958155	3103	115459660	80210841066	334544623	759838925	413	413	4.15684e-35	2.12174e-33	0.125,0.297,0.382	0.306,0.394,0.402	-0.099
5	238505	Mtr	NC_000079.7	-	12210123	12210279	12215082	12215164	12205089	12205290	12219628	12219749	5	18,29,26	34,13,12	17,19,24	54,48,70	231	305	4.85678e-35	2.44458e-33	0.411,0.747,0.741	0.294,0.343,0.312	0.317
2647	239337	Adamts12	NC_000081.7	+	11327764	11327944	11331803	11331947	11317288	11317441	11336380	11336540	2647	4,8,1	0,2,1	1,2,0	4,0,0	329	293	4.98206e-35	2.47328e-33	1.0,0.781,0.471	0.182,1.0,NA	0.16
141	22428	Dctn6	NC_000074.7	-	34566072	34566255	34572139	34572219	34564342	34564448	34573495	34573560	141	3,1,4	13,1,5	1,1,5	2,1,1	229	332	1.10962e-34	5.43414e-33	0.251,0.592,0.537	0.42,0.592,0.879	-0.17
3610	102636514	Hand2os1	NC_000074.7	-	57767549	57767649	57773218	57773323	57760113	57760210	57773723	57773894	3610	85,56,59	217,121,97	50,51,50	46,65,69	254	249	1.88467e-34	9.10671e-33	0.277,0.312,0.374	0.516,0.435,0.415	-0.134
2156	68667	Trpm4	NC_000073.7	-	44976695	44976876	44977144	44977319	44976400	44976564	44982805	44982876	2156	24,30,29	22,52,45	11,11,7	53,42,32	324	330	7.04767e-34	3.36063e-32	0.526,0.37,0.396	0.175,0.211,0.182	0.241
2667	107351	Kank1	NC_000085.7	+	25252111	25252198	25295668	25295796	25214338	25214681	25355774	25355894	2667	7,8,8	11,7,6	0,1,3	8,2,4	236	277	9.69444e-34	4.56268e-32	0.428,0.573,0.61	0.0,0.37,0.468	0.258
3834	22138	Ttn	NC_000068.8	-	76649079	76649160	76662131	76662218	76648132	76648207	76677731	76677815	3834	64351324	16319321899	84,91,142	134312731570	236	230	1.63278e-33	7.58617e-32	0.277,0.15,0.143	0.057,0.065,0.081	0.122
3486	11496	Adam22	NC_000071.7	-	8137981	8138068	8140141	8140252	8132145	8132269	8142339	8142406	3486	0,0,2	9,12,23	0,1,8	4,13,14	260	236	2.05623e-33	9.43265e-32	0.0,0.0,0.073	0.0,0.065,0.342	-0.111
2923	320712	Abi3bp	NC_000082.7	+	56447029	56447110	56447922	56448036	56444865	56444925	56449458	56449518	2923	0,3,7	0,4,3	7,6,10	3,2,0	230	263	1.44181e-32	6.53138e-31	NA,0.462,0.727	0.727,0.774,1.0	-0.239
78	65973	Asph	NC_000070.7	-	9610842	9610938	9624359	9624401	9604515	9604629	9635900	9635969	78	65,127,93	282331304	129115128	220165223	191	245	1.70764e-32	7.6401e-31	0.228,0.33,0.282	0.429,0.472,0.424	-0.162
258	109181	Trip11	NC_000078.7	-	101828851	101828951	101838082	101838186	101812854	101812936	101839581	101839745	258	108,41,44	27,53,53	29,27,41	57,33,45	253	249	1.87823e-32	8.30087e-31	0.797,0.432,0.45	0.334,0.446,0.473	0.142
3728	224619	Traf7	NC_000083.7	-	24733686	24733803	24735478	24735573	24733098	24733191	24737715	24737773	3728	6,16,13	51,41,32	19,18,22	32,27,35	244	266	2.23881e-32	9.77525e-31	0.114,0.298,0.307	0.393,0.421,0.407	-0.167
2742	317717	Sec22a	NC_000082.7	-	35139173	35139239	35149867	35149983	35133778	35134657	35167968	35168163	2742	19,15,17	28,16,9	21,17,36	14,8,11	265	215	4.23529e-32	1.82722e-30	0.355,0.432,0.605	0.549,0.633,0.726	-0.172
1578	56542	Cilk1	NC_000075.7	+	78038576	78038853	78042877	78042932	78016473	78016763	78047257	78047379	1578	37,56,57	7,10,6	38,39,70	2,2,3	426	204	6.13177e-32	2.6143e-30	0.717,0.728,0.82	0.901,0.903,0.918	-0.152
3635	103583	Fbxw11	NC_000077.7	+	32602747	32602904	32658187	32658250	32592554	32592935	32661771	32661997	3635	10,27,23	80,49,50	43,18,41	12,58,26	306	212	1.11124e-31	4.6827e-30	0.08,0.276,0.242	0.713,0.177,0.522	-0.271
3609	69470	Tmem127	NC_000068.8	+	127090411	127090729	127097924	127098089	127089867	127090004	127098876	127103028	3609	160164141	129,67,69	133124118	28,52,43	467	314	1.24803e-31	5.19871e-30	0.455,0.622,0.579	0.762,0.616,0.649	-0.124
140	22428	Dctn6	NC_000074.7	-	34566072	34566255	34572139	34572193	34564342	34564448	34573495	34573560	140	4,1,9	13,1,5	1,8,6	2,1,1	203	332	2.17823e-31	8.97035e-30	0.335,0.621,0.746	0.45,0.929,0.908	-0.195
2236	13824	Epb41l4a	NC_000084.7	-	34024477	34024529	34054882	34054987	34019403	34019482	34139037	34139475	2236	9,9,10	10,7,8	9,9,6	5,2,0	254	201	2.2775e-31	9.27376e-30	0.416,0.504,0.497	0.588,0.781,1.0	-0.317
1320	232664	Ccdc136	NC_000072.7	+	29412362	29412533	29412900	29413086	29411246	29411384	29414784	29414979	1320	1,0,1	0,0,6	0,1,7	1,5,4	320	335	3.01911e-31	1.2157e-29	1.0,NA,0.149	0.0,0.173,0.647	0.301
2092	360013	Myo18a	NC_000077.7	+	77705459	77705537	77706681	77706717	77702834	77703545	77708444	77708532	2092	56,109,87	64,61,37	89,88,102	52,22,27	227	185	5.94055e-31	2.36578e-29	0.416,0.593,0.657	0.582,0.765,0.755	-0.145
209	29857	Mapk12	NC_000081.7	-	89019325	89019373	89019629	89019659	89018814	89018929	89019779	89019891	209	17,7,14	9,5,6	6,2,10	7,8,12	179	197	6.50394e-31	2.56199e-29	0.675,0.606,0.72	0.485,0.216,0.478	0.274
589	16795	Large1	NC_000074.7	-	73825457	73825581	73858458	73858760	73774921	73775093	73940752	73940940	589	363406395	200,95,113	337281415	60,67,88	451	273	1.8685e-30	7.28111e-29	0.524,0.721,0.679	0.773,0.717,0.741	-0.102
255	67273	Ndufa10	NC_000067.7	-	92395102	92395189	92397584	92397800	92392082	92392204	92398538	92398707	255	110123692498	1004727724	264524862809	691715818	365	236	1.69567e-29	6.53735e-28	0.415,0.678,0.69	0.712,0.692,0.689	-0.103
2528	231051	Kmt2c	NC_000071.7	-	25543410	25543579	25549905	25550036	25534444	25534573	25552358	25552478	2528	32,61,82	42,20,14	84,67,62	20,12,10	280	318	9.1379e-29	3.48587e-27	0.464,0.776,0.869	0.827,0.864,0.876	-0.153
3284	70430	Tbce	NC_000079.7	-	14175694	14175763	14178114	14178281	14174642	14174702	14179727	14179868	3284	61,55,47	4,8,10	30,41,38	12,13,11	316	218	9.92283e-29	3.74587e-27	0.913,0.826,0.764	0.633,0.685,0.704	0.16
1266	102631735	A630039O03Rik	NC_000069.7	+	149159104	149159163	149182859	149183011	149134894	149150757	149183740	149183818	1266	2,3,1	7,0,1	2,0,0	0,2,1	208	301	3.31456e-28	1.23835e-26	0.293,1.0,0.591	1.0,0.0,0.0	0.295
1283	11652	Akt2	NC_000073.7	+	27308047	27308178	27315665	27315794	27290976	27291304	27317632	27317744	1283	339225206	183235236	216178219	259249300	280	278	1.75082e-27	6.47448e-26	0.648,0.487,0.464	0.453,0.415,0.42	0.104
2759	23917	Impdh1	NC_000072.7	-	29209218	29209267	29212067	29212166	29207093	29207195	29216070	29216363	2759	4,8,7	8,20,16	2,0,2	6,10,10	248	198	2.4119e-27	8.82901e-26	0.285,0.242,0.259	0.21,0.0,0.138	0.146
574	54169	Kat6b	NC_000080.7	+	21672022	21672155	21674900	21675283	21669285	21669367	21676786	21676908	574	23,45,36	26,52,50	19,21,11	43,27,52	282	532	7.293e-27	2.64298e-25	0.625,0.62,0.576	0.455,0.595,0.285	0.162
2544	74302	Mtmr3	NC_000077.7	-	4435362	4435451	4435878	4435989	4430866	4432939	4437233	4438632	2544	63,33,27	124,59,43	40,28,37	28,9,18	260	238	7.39403e-27	2.65307e-25	0.317,0.339,0.365	0.567,0.74,0.653	-0.313
1333	13046	Celf1	NC_000068.8	+	90784633	90784686	90818009	90818161	90770741	90770986	90828924	90829112	1333	0,0,4	43,83,84	10,4,13	118,79,114	202	301	8.69658e-27	3.08984e-25	0.0,0.0,0.066	0.112,0.07,0.145	-0.087
2328	13018	Ctcf	NC_000074.7	+	106380010	106380179	106381371	106381463	106370147	106370264	106390385	106391175	2328	2,2,8	0,0,2	3,0,4	1,0,4	318	241	1.00433e-26	3.53368e-25	1.0,1.0,0.752	0.695,NA,0.431	0.354
3393	64602	Ireb2	NC_000075.7	+	54791180	54791399	54793158	54793228	54789602	54789740	54793773	54793957	3393	115,74,80	35,41,24	66,62,67	45,33,50	368	219	1.2859e-26	4.48087e-25	0.662,0.518,0.665	0.466,0.528,0.444	0.136
1206	71985	Acad10	NC_000071.7	-	121790018	121790167	121791726	121791851	121787416	121787611	121794076	121794276	1206	0,2,2	2,10,9	4,3,3	8,2,4	274	298	1.67069e-26	5.76625e-25	0.0,0.179,0.195	0.352,0.62,0.449	-0.349
4020	28075	Desi1	NC_000081.7	-	81883705	81883815	81886741	81886811	81882310	81882433	81887958	81887980	4020	30,20,8	8,24,24	7,15,24	34,34,29	219	259	1.88919e-26	6.4589e-25	0.816,0.496,0.283	0.196,0.343,0.495	0.187
781	20452	St8sia4	NC_000067.7	-	95555231	95555525	95581237	95581495	95515406	95519689	95588588	95588720	781	82,28,48	56,40,30	37,20,36	58,23,55	407	443	2.54687e-26	8.62604e-25	0.614,0.432,0.635	0.41,0.486,0.416	0.123
4127	208727	Hdac4	NC_000067.7	-	92019453	92019540	92069241	92069303	91982622	91982694	92075977	92076216	4127	0,2,8	7,2,8	0,0,3	13,4,7	211	236	3.7774e-26	1.26753e-24	0.0,0.528,0.528	0.0,0.0,0.324	0.244
609	77733	Rnf170	NC_000074.7	+	26625656	26625730	26629007	26629118	26619074	26619183	26630838	26633903	609	20,9,11	8,18,26	3,5,14	26,11,29	223	260	3.82655e-26	1.27224e-24	0.745,0.368,0.33	0.119,0.346,0.36	0.206
3395	100043911	Ppp4r1l-ps	NC_000068.8	-	173450525	173450672	173457275	173458216	173438832	173438980	173501115	173501160	3395	31,19,27	9,8,11	14,5,5	4,8,9	1090	296	1.29041e-25	4.25133e-24	0.483,0.392,0.4	0.487,0.145,0.131	0.171
3402	17261	Mef2d	NC_000069.7	+	88065340	88065478	88065527	88065662	88063628	88063832	88066428	88066639	3402	547283322	74,86,73	230210241	204183238	287	284	1.34911e-25	4.40466e-24	0.88,0.765,0.814	0.527,0.532,0.501	0.3
3797	22138	Ttn	NC_000068.8	-	76662131	76662218	76673719	76673836	76648132	76648207	76674548	76674623	3797	0,12,0	2,0,1	0,2,1	0,0,2	266	236	1.66387e-25	5.38379e-24	0.0,1.0,0.0	NA,1.0,0.307	-0.32
805	11907	Ate1	NC_000073.7	-	130106423	130106552	130109211	130109429	130083412	130083445	130110736	130110988	805	23131117	31,49,44	122,91,126	24,29,38	367	278	8.89488e-25	2.85266e-23	0.36,0.669,0.668	0.794,0.704,0.715	-0.172
3337	72145	Wdfy3	NC_000071.7	-	102157654	102157753	102189520	102189609	102129244	102129455	102217461	102217837	3337	140,60,57	9,42,37	40,47,69	33,26,45	238	248	9.78281e-25	3.1099e-23	0.942,0.598,0.616	0.558,0.653,0.615	0.11
3443	23945	Mgll	NC_000072.7	+	88702682	88702827	88741577	88741684	88701393	88701553	88784992	88785129	3443	182161182	231,102,87	177146197	71,80,102	294	256	1.26554e-24	3.98811e-23	0.407,0.579,0.646	0.685,0.614,0.627	-0.098
3028	83997	Slmap	NC_000080.7	-	26174692	26174755	26181058	26181109	26163729	26163789	26181196	26181365	3028	32,43,56	5,13,24	44,51,51	17,22,53	200	212	1.57042e-24	4.9062e-23	0.872,0.778,0.712	0.733,0.711,0.505	0.138
2077	233552	Gdpd5	NC_000073.7	+	99073259	99073436	99087454	99087558	99059615	99059698	99090378	99090472	2077	36,37,23	16,18,36	52,33,25	18,7,15	326	253	2.0619e-24	6.3866e-23	0.636,0.615,0.331	0.692,0.785,0.564	-0.153
50	241846	Lsm14b	NC_000068.8	+	179673153	179673321	179673586	179673664	179669692	179669828	179673853	179674015	50	104,59,50	66,75,68	30,38,41	72,54,61	317	227	3.31741e-24	1.01884e-22	0.53,0.36,0.345	0.23,0.335,0.325	0.115
38	68055	Dmac2l	NC_000078.7	+	69772228	69772328	69784724	69784835	69771718	69771788	69787672	69787881	38	0,2,6	85,65,54	11,6,8	69,35,55	249	260	4.86932e-24	1.48289e-22	0.0,0.031,0.104	0.143,0.152,0.132	-0.097
3206	19090	Prkdc	NC_000082.7	+	15472684	15472715	15474119	15474277	15472545	15472601	15480846	15480993	3206	7,3,4	33,12,28	2,2,0	28,14,19	180	307	6.98201e-24	2.10857e-22	0.266,0.299,0.196	0.109,0.196,0.0	0.152
1190	12017	Bag1	NC_000070.7	-	40939076	40939184	40941524	40941638	40937131	40937194	40943624	40943707	1190	418455428	50373420	418388457	330350393	263	257	1.23005e-23	3.68406e-22	0.891,0.544,0.499	0.553,0.52,0.532	0.11
1543	26406	Map3k3	NC_000077.7	+	106041834	106041966	106042443	106042573	106041095	106041244	106043042	106043220	1543	111,77,65	31,29,51	62,47,52	47,40,46	281	279	1.71846e-23	5.09205e-22	0.78,0.725,0.559	0.567,0.538,0.529	0.143
3636	103583	Fbxw11	NC_000077.7	+	32602747	32602904	32630200	32630302	32592554	32592935	32661771	32661997	3636	10,27,23	8,8,9	43,18,41	0,1,0	306	251	1.72826e-23	5.09205e-22	0.506,0.735,0.677	1.0,0.937,1.0	-0.34
529	19364	Rad51d	NC_000077.7	-	82780517	82780636	82780795	82780857	82774708	82774790	82781163	82781450	529	16,14,16	44,21,28	17,8,14	8,14,15	211	268	4.89382e-23	1.43026e-21	0.316,0.459,0.421	0.73,0.421,0.542	-0.166
1385	26457	Slc27a1	NC_000074.7	+	72021985	72022092	72023364	72023532	72021514	72021667	72032047	72032442	1385	69,98,112	155144201	108138109	153137118	256	317	6.8637e-23	1.98992e-21	0.355,0.457,0.408	0.466,0.555,0.534	-0.112
2910	224902	Safb2	NC_000083.7	-	56873878	56874015	56874532	56874624	56873325	56873616	56875894	56876022	2910	22,69,62	14,21,49	42,56,56	51,41,64	241	286	8.71953e-23	2.5079e-21	0.651,0.796,0.6	0.494,0.618,0.509	0.142
3789	22138	Ttn	NC_000068.8	-	76714689	76714977	76733406	76733970	76714253	76714541	76736597	76736876	3789	477333994049	390216811965	121210881386	442446611	713	437	2.4138e-22	6.88787e-21	0.428,0.553,0.558	0.627,0.599,0.582	-0.09
3146	80285	Parp9	NC_000082.7	+	35763738	35763772	35767870	35768724	35761402	35761505	35773932	35774148	3146	3,2,11	228168164	11,8,7	154,98,122	183	1003	3.77202e-22	1.06795e-20	0.067,0.061,0.269	0.281,0.309,0.239	-0.144
439	230451	Junos	NC_000070.7	+	94989294	94989544	95021866	95025731	94961304	94964107	95035341	95035437	439	1,3,2	44,35,35	1,3,3	11,13,19	399	4014	5.1578e-22	1.43784e-20	0.186,0.463,0.365	0.478,0.699,0.614	-0.259
442	230451	Junos	NC_000070.7	+	94989294	94989544	95021866	95025731	94980526	94981970	95035341	95035437	442	1,3,2	44,35,35	1,3,3	11,13,19	399	4014	5.1578e-22	1.43784e-20	0.186,0.463,0.365	0.478,0.699,0.614	-0.259
184	78757	Rictor	NC_000081.7	+	6774929	6775061	6780138	6780202	6773808	6773873	6785941	6786068	184	19,42,37	28,12,15	44,33,38	7,12,13	281	213	5.30478e-22	1.46752e-20	0.34,0.726,0.652	0.827,0.676,0.689	-0.158
3179	14276	Folr2	NC_000073.7	-	101490018	101490204	101492874	101493027	101489797	101489933	101494410	101494538	3179	0,0,1	26,17,15	8,5,11	32,17,15	302	335	5.59646e-22	1.53648e-20	0.0,0.0,0.069	0.217,0.246,0.449	-0.281
3511	381236	Lipo3	NC_000085.7	-	33557864	33557974	33559452	33559651	33534506	33534578	33560446	33560564	3511	10,9,10	4,6,3	14,24,8	2,1,4	348	259	6.97541e-22	1.90067e-20	0.65,0.527,0.713	0.839,0.947,0.598	-0.165
1449	19244	Ptp4a2	NC_000070.7	+	129736462	129736555	129738854	129738985	129732770	129733471	129740257	129740332	1449	463237242	253327303	211242295	370319376	242	280	7.70241e-22	2.0831e-20	0.679,0.456,0.48	0.398,0.467,0.476	0.091
2898	211586	Tfdp2	NC_000075.7	+	96155891	96155995	96169653	96169775	96105146	96105251	96177017	96177180	2898	9,16,12	10,28,29	8,5,23	52,40,48	253	271	8.928e-22	2.39667e-20	0.491,0.38,0.307	0.141,0.118,0.339	0.193
988	114863	Plpbp	NC_000074.7	+	27539201	27539336	27541286	27541429	27535951	27536027	27542263	27542362	988	77179188	251152153	155134174	130106139	284	292	1.04575e-21	2.7866e-20	0.24,0.548,0.558	0.551,0.565,0.563	-0.111
3521	17258	Mef2a	NC_000073.7	-	66917814	66917952	66918016	66918148	66915690	66915910	66945122	66945326	3521	413279320	251373332	273200266	334329365	281	287	1.10341e-21	2.9188e-20	0.627,0.433,0.496	0.455,0.383,0.427	0.097
460	57258	Xpo4	NC_000080.7	-	57880791	57880946	57885875	57885981	57880538	57880680	57902344	57902695	460	22,54,26	13,13,16	32,21,37	5,7,4	255	304	1.2398e-21	3.25583e-20	0.669,0.832,0.66	0.884,0.781,0.917	-0.14
2476	545370	Hmcn1	NC_000067.7	-	150525329	150525513	150525712	150525837	150524637	150524735	150528262	150528422	2476	24,47,25	71,53,61	22,12,26	16,26,20	274	333	1.93208e-21	5.0373e-20	0.291,0.519,0.332	0.626,0.359,0.612	-0.152
3525	73692	Cplane1	NC_000081.7	+	8263247	8263352	8271753	8271825	8261529	8261584	8273286	8273396	3525	2,5,18	0,10,12	19,10,13	2,10,2	254	221	2.06459e-21	5.34433e-20	1.0,0.303,0.566	0.892,0.465,0.85	-0.113
697	21846	Tie1	NC_000070.7	-	118336809	118337100	118337298	118337436	118336058	118336349	118337607	118337766	697	147,71,64	271225184	56,59,74	279199266	287	440	4.94908e-21	1.27202e-19	0.454,0.326,0.348	0.235,0.312,0.299	0.094
1842	80286	Tusc3	NC_000074.7	+	39538529	39538670	39564078	39564168	39530344	39530462	39593682	39593746	1842	0,1,1	68,62,46	5,8,2	21,31,35	290	239	5.61964e-21	1.43419e-19	0.0,0.013,0.018	0.164,0.175,0.045	-0.118
2576	51796	Srrm1	NC_000070.7	-	135054402	135054531	135056314	135056356	135052129	135052591	135056683	135056828	2576	8,32,23	3,18,68	14,14,26	43,51,37	191	278	7.89892e-21	2.0018e-19	0.795,0.721,0.33	0.322,0.285,0.506	0.244
3512	381236	Lipo3	NC_000085.7	-	33535664	33535736	33556761	33556898	33534506	33534578	33557864	33557974	3512	10,4,5	9,4,12	6,12,10	2,6,7	286	221	1.09878e-20	2.76526e-19	0.462,0.436,0.244	0.699,0.607,0.525	-0.23
965	243078	Tecrl	NC_000071.7	-	83448696	83448812	83457049	83457153	83442420	83442526	83461130	83461175	965	261145173	63113154	154139147	113129148	253	265	1.41579e-20	3.53849e-19	0.813,0.573,0.541	0.588,0.53,0.51	0.1
3361	78938	Fbxo34	NC_000080.7	+	47744721	47744903	47763661	47763771	47738250	47738327	47766631	47769419	3361	3,4,5	11,10,8	4,0,0	11,7,19	331	259	1.74589e-20	4.33363e-19	0.176,0.238,0.328	0.222,0.0,0.0	0.173
769	102693	Phldb1	NC_000075.7	-	44612242	44612383	44612799	44612967	44610852	44610993	44615099	44615189	769	36,49,37	103,84,76	64,60,73	87,76,95	317	290	9.48989e-20	2.33955e-18	0.242,0.348,0.308	0.402,0.419,0.413	-0.112
948	100273	Osbpl9	NC_000070.7	-	108930233	108930346	108940285	108940445	108930010	108930129	108943523	108943628	948	50,90,123	193122104	121103137	137108120	309	262	1.2264e-19	3.00302e-18	0.18,0.385,0.501	0.428,0.447,0.492	-0.1
3747	20224	Sar1a	NC_000076.7	+	61517877	61517927	61519839	61519966	61516063	61516192	61520658	61520732	3747	3,4,3	3,12,8	0,1,2	10,8,19	199	276	1.67077e-19	4.06367e-18	0.581,0.316,0.342	0.0,0.148,0.127	0.321
1831	18021	Nfatc3	NC_000074.7	+	106825703	106825844	106827565	106827621	106822795	106822968	106830656	106830783	1831	65,59,59	14,20,8	43,43,44	25,25,28	290	205	2.11062e-19	5.09925e-18	0.766,0.676,0.839	0.549,0.549,0.526	0.219
3871	22138	Ttn	NC_000068.8	-	76686608	76686710	76687146	76687248	76649079	76649160	76687498	76687573	3871	10,2,13	0,5,4	0,0,0	1,1,4	251	251	2.86246e-19	6.86991e-18	1.0,0.286,0.765	0.0,0.0,0.0	0.684
381	74106	Dcaf6	NC_000067.7	-	165195014	165195074	165201630	165201804	165184997	165185115	165216226	165216484	381	71,86,90	1,33,16	89110125	36,29,48	323	209	4.00618e-19	9.55157e-18	0.979,0.628,0.784	0.615,0.711,0.628	0.146
3377	107568	Wwp1	NC_000070.7	-	19661965	19662032	19662121	19662259	19659562	19659747	19672418	19672543	3377	30,68,73	68,53,71	108105106	99,55,75	287	216	4.24064e-19	1.00445e-17	0.249,0.491,0.436	0.451,0.59,0.515	-0.127
1023	22367	Vrk1	NC_000078.7	+	106009095	106009151	106028888	106029067	106002798	106002963	106036783	106036874	1023	23,15,24	25,37,47	6,11,11	34,27,32	205	328	4.2954e-19	1.01081e-17	0.595,0.393,0.45	0.22,0.395,0.355	0.156
414	74166	Tmem38a	NC_000074.7	+	73335028	73335116	73338543	73338661	73333803	73333988	73339705	73341128	414	609365336	230729625	383395434	749672794	237	267	1.01159e-18	2.36515e-17	0.749,0.361,0.377	0.366,0.398,0.381	0.114
863	52443	Mrpl48	NC_000073.7	-	100201785	100201888	100208954	100209124	100199746	100199836	100214400	100214486	863	61247229	132120104	239212251	77,81,118	319	252	1.55469e-18	3.61167e-17	0.267,0.619,0.635	0.71,0.674,0.627	-0.163
3041	224440	Setd4	NC_000082.7	-	93394248	93394308	93395204	93395666	93393185	93393223	93396099	93396195	3041	11,2,8	2,0,1	9,2,6	5,0,1	611	209	1.61951e-18	3.73828e-17	0.653,1.0,0.732	0.381,1.0,0.672	0.111
4064	26921	Map4k4	NC_000067.7	+	40039690	40039909	40042916	40043147	40036180	40036342	40043966	40044073	4064	44,73,89	243170167	105,87,91	145152209	368	380	1.70751e-18	3.91646e-17	0.158,0.307,0.355	0.428,0.371,0.31	-0.096
3706	71296	Crnde	NC_000074.7	-	93072977	93073091	93073411	93073546	93053014	93053090	93077318	93077382	3706	11,7,6	1,6,3	1,2,7	0,2,0	284	263	2.19442e-18	5.00162e-17	0.911,0.519,0.649	1.0,0.481,1.0	-0.134
42	66124	Josd2	NC_000073.7	+	44119835	44119961	44120536	44120731	44118230	44118393	44120838	44121082	42	74121100	197161171	174148195	176207238	275	344	2.84562e-18	6.44534e-17	0.32,0.485,0.422	0.553,0.472,0.506	-0.101
1437	107976	Babam2	NC_000071.7	+	31977821	31978016	31988428	31988503	31942921	31943016	32058398	32058508	1437	93,81,77	70,53,49	86,72,89	25,30,50	344	224	2.87544e-18	6.47242e-17	0.464,0.499,0.506	0.691,0.61,0.537	-0.123
1390	26457	Slc27a1	NC_000074.7	+	72021985	72022076	72023364	72023532	72021514	72021667	72032047	72032442	1390	68,97,110	155144201	106128106	153137118	240	317	2.94131e-18	6.57981e-17	0.367,0.471,0.42	0.478,0.552,0.543	-0.105
4110	57752	Tacc2	NC_000073.7	+	130229127	130229229	130276331	130276469	130223450	130228571	130318432	130318569	4110	312231313	54197333	243342256	235304229	251	287	3.83e-18	8.51528e-17	0.869,0.573,0.518	0.542,0.563,0.561	0.098
3260	96957	Tmem62	NC_000068.8	+	120829554	120829639	120832977	120833082	120826886	120827000	120835162	120835281	3260	6,3,1	10,4,6	2,3,11	5,5,2	234	254	6.6075e-18	1.4601e-16	0.394,0.449,0.153	0.303,0.394,0.857	-0.186
3501	625098	Slc38a6	NC_000078.7	+	73340472	73340573	73356918	73356971	73338933	73339007	73365750	73365790	3501	8,6,2	6,2,1	4,5,1	2,0,1	250	202	7.70425e-18	1.69213e-16	0.519,0.708,0.618	0.618,1.0,0.447	-0.073
3653	18639	Pfkfb1	NC_000086.8	+	149372948	149373080	149391581	149391707	149371940	149372040	149394001	149394095	3653	1,9,9	14,30,29	2,3,4	50,54,54	281	275	8.17877e-18	1.78553e-16	0.065,0.227,0.233	0.038,0.052,0.068	0.122
2920	74213	Rbm26	NC_000080.7	-	105349754	105349838	105350904	105350963	105344186	105347238	105354421	105354535	2920	7,3,10	4,0,1	7,0,2	0,3,4	208	233	9.052e-18	1.96434e-16	0.662,1.0,0.918	1.0,0.0,0.359	0.407
2616	105689	Mycbp2	NC_000080.7	-	103398276	103398378	103407292	103407472	103392559	103394203	103410002	103410125	2616	8,29,8	12,11,14	19,16,14	9,2,9	329	251	1.51227e-17	3.26219e-16	0.337,0.668,0.304	0.617,0.859,0.543	-0.237
2872	67725	Nudt13	NC_000080.7	+	20345155	20345334	20350654	20350747	20344757	20344860	20354020	20354160	2872	18,25,29	12,36,30	22,24,27	55,26,63	328	242	1.93218e-17	4.14332e-16	0.525,0.339,0.416	0.228,0.405,0.24	0.136
3182	626596	Rgs22	NC_000081.7	-	36015759	36015915	36025953	36026133	36013223	36013319	36040698	36040860	3182	1,1,1	0,0,1	0,1,4	2,2,0	329	305	6.24163e-17	1.33057e-15	1.0,1.0,0.481	0.0,0.317,1.0	0.388
328	108011	Ap4e1	NC_000068.8	+	126856089	126856213	126861205	126861279	126853710	126853782	126870091	126870213	328	11,20,18	14,11,5	25,15,17	3,2,2	273	223	7.15668e-17	1.51671e-15	0.391,0.598,0.746	0.872,0.86,0.874	-0.29
3309	100503884	Ccdc149	NC_000071.7	-	52578073	52578181	52593039	52593078	52563317	52563434	52596400	52596562	3309	8,9,13	8,10,11	8,8,2	16,14,7	188	257	7.27552e-17	1.53294e-15	0.578,0.552,0.618	0.406,0.439,0.281	0.207
1112	67655	Ctdp1	NC_000084.7	-	80477380	80477543	80489100	80489310	80463657	80463845	80490638	80490780	1112	32,42,21	20,19,20	21,26,20	28,16,31	359	312	8.29091e-17	1.73678e-15	0.582,0.658,0.477	0.395,0.585,0.359	0.126
3366	70373	Gpatch2l	NC_000078.7	+	86303641	86303706	86307350	86307527	86290808	86291480	86308389	86308469	3366	14,16,14	28,28,31	6,3,15	25,25,41	214	326	9.73601e-17	2.02778e-15	0.432,0.465,0.408	0.268,0.155,0.358	0.175
3895	381668	Fbrsl1	NC_000071.7	-	110519411	110519489	110522255	110522385	110519151	110519235	110523872	110523944	3895	13,48,34	33,54,70	34,38,49	37,28,44	279	227	1.12265e-16	2.32484e-15	0.243,0.42,0.283	0.428,0.525,0.475	-0.161
2227	14158	Fer	NC_000083.7	+	64248577	64248752	64264119	64264312	64248285	64248475	64280059	64280152	2227	2,3,4	2,3,4	2,0,3	0,0,2	324	342	1.4201e-16	2.92411e-15	0.514,0.514,0.514	1.0,NA,0.613	-0.292
3259	96957	Tmem62	NC_000068.8	+	120817316	120817439	120820811	120820967	120817063	120817188	120823958	120824118	3259	1,1,8	2,7,9	4,10,9	3,6,8	272	305	1.53113e-16	3.13493e-15	0.359,0.138,0.499	0.599,0.651,0.558	-0.271
1666	69257	Elf2	NC_000069.7	-	51201513	51201609	51207203	51207306	51174173	51174287	51215470	51215636	1666	17,13,7	4,1,2	7,1,4	0,2,1	252	245	2.19957e-16	4.47823e-15	0.805,0.927,0.773	1.0,0.327,0.795	0.128
74	232341	Wnk1	NC_000072.7	-	119921661	119921745	119923197	119923281	119920766	119920827	119924935	119926380	74	151236229	458219220	281287370	280262352	233	233	2.53848e-16	5.13935e-15	0.248,0.519,0.51	0.501,0.523,0.512	-0.086
2646	98828	Cdc123	NC_000068.8	-	5826086	5826193	5827912	5828008	5815606	5815655	5837891	5837924	2646	48,92,83	141,77,94	82,81,106	71,63,79	245	256	2.83501e-16	5.70783e-15	0.262,0.555,0.48	0.547,0.573,0.584	-0.136
4065	26921	Map4k4	NC_000067.7	+	40039690	40039909	40042922	40043147	40036180	40036342	40043966	40044073	4065	44,73,89	232168163	105,87,91	145147208	368	374	3.34627e-16	6.69994e-15	0.162,0.306,0.357	0.424,0.376,0.308	-0.094
1690	226255	Atrnl1	NC_000085.7	+	57785856	57785935	57924028	57924136	57766315	57766377	58030759	58030874	1690	35,16,23	20,25,14	21,18,13	26,30,19	228	257	3.85589e-16	7.67789e-15	0.664,0.419,0.649	0.477,0.403,0.435	0.139
2577	51796	Srrm1	NC_000070.7	-	135054402	135054534	135056314	135056356	135052129	135052591	135056683	135056828	2577	8,32,23	6,32,90	14,14,26	56,73,52	191	281	2.29815e-15	4.55109e-14	0.662,0.595,0.273	0.269,0.22,0.424	0.206
2545	320538	Ubn2	NC_000072.7	+	38429804	38429906	38438409	38438547	38417389	38417482	38439897	38440001	2545	41,62,39	29,85,78	18,25,36	58,51,62	251	287	2.33971e-15	4.60821e-14	0.618,0.455,0.364	0.262,0.359,0.399	0.139
1101	71715	Dhx35	NC_000068.8	+	158684775	158684853	158685997	158686127	158684224	158684319	158688827	158688909	1101	38,10,13	33,22,33	15,7,9	30,26,27	227	279	2.43197e-15	4.76404e-14	0.586,0.358,0.326	0.381,0.249,0.291	0.116
450	67009	Ttc23	NC_000073.7	+	67301670	67301719	67312074	67312274	67297033	67297593	67316910	67317034	450	5,2,0	20,8,29	0,1,0	11,27,15	198	349	2.53753e-15	4.94409e-14	0.306,0.306,0.0	0.0,0.061,0.0	0.184
1400	244886	Tmem266	NC_000075.7	+	55288450	55288653	55303679	55303907	55287962	55288151	55305024	55305179	1400	2,2,1	0,0,3	1,0,5	2,2,2	352	377	3.38967e-15	6.56908e-14	1.0,1.0,0.263	0.349,0.0,0.728	0.395
2615	105689	Mycbp2	NC_000080.7	-	103398276	103398378	103407292	103407448	103392559	103394203	103410002	103410125	2615	14,39,18	12,11,14	22,25,27	9,2,9	305	251	4.95654e-15	9.55453e-14	0.49,0.745,0.514	0.668,0.911,0.712	-0.181
874	330814	Adgrl1	NC_000074.7	+	84650834	84650984	84655296	84655520	84649627	84649737	84656092	84656893	874	4,3,0	2,10,8	6,4,6	11,7,1	299	373	5.82289e-15	1.11652e-13	0.714,0.272,0.0	0.405,0.416,0.882	-0.239
2037	27103	Eif2ak4	NC_000068.8	+	118231015	118231128	118243415	118243564	118219065	118219333	118247707	118247823	2037	0,10,19	28,13,15	15,17,8	14,17,9	262	298	6.71909e-15	1.28158e-13	0.0,0.467,0.59	0.549,0.532,0.503	-0.176
1031	241066	Carf	NC_000067.7	+	60147241	60147359	60148485	60148608	60144469	60144593	60164009	60164070	1031	0,1,6	11,18,21	3,0,13	13,16,15	267	272	7.12138e-15	1.3512e-13	0.0,0.054,0.225	0.19,0.0,0.469	-0.127
2258	72068	Cnot2	NC_000076.7	-	116353221	116353288	116384937	116385080	116342945	116343093	116417357	116417416	2258	2,15,7	33,29,42	31,14,19	19,19,25	292	216	7.79065e-15	1.47048e-13	0.043,0.277,0.11	0.547,0.353,0.36	-0.277
1715	19663	Rbpms	NC_000074.7	-	34296744	34296878	34324331	34324482	34285109	34285178	34353013	34353076	1715	497581622	73347312	410336459	203206289	300	283	8.35523e-15	1.56888e-13	0.865,0.612,0.653	0.656,0.606,0.6	0.089
3526	99526	Usp53	NC_000069.7	-	122763500	122763607	122776333	122776358	122762237	122762898	122777930	122778184	3526	2,5,5	0,4,1	1,0,1	0,0,3	174	256	1.58593e-14	2.96258e-13	1.0,0.648,0.88	1.0,NA,0.329	0.178
3790	22138	Ttn	NC_000068.8	-	76678622	76678700	76680649	76680724	76678068	76678152	76680913	76680988	3790	4,51,19	17,62,43	4,1,6	17,22,8	224	227	1.61309e-14	2.99786e-13	0.193,0.455,0.309	0.193,0.044,0.432	0.096
1869	72194	Fbxl20	NC_000077.7	-	97987754	97987885	97989245	97989320	97985958	97986019	97990808	97990935	1869	26,32,20	93,40,35	28,17,24	29,26,31	224	280	1.74982e-14	3.23538e-13	0.259,0.5,0.417	0.547,0.45,0.492	-0.104
3117	18798	Plcb4	NC_000068.8	+	135583749	135583807	135647468	135647525	135501432	135501650	135719302	135719401	3117	11,11,19	38,9,34	24,19,24	22,25,26	207	206	1.88898e-14	3.47495e-13	0.224,0.549,0.357	0.521,0.431,0.479	-0.1
703	66052	Sdhc	NC_000067.7	-	170966262	170966324	170971126	170971228	170963561	170963725	170973324	170973381	703	5861001874	925535486	9109871186	531515646	251	211	2.00935e-14	3.67773e-13	0.347,0.611,0.602	0.59,0.617,0.607	-0.085
1136	228026	Pdk1	NC_000068.8	+	71716325	71716403	71717725	71717802	71714186	71714276	71719239	71719338	1136	377192191	289208232	130120126	161188188	227	226	2.04173e-14	3.7182e-13	0.565,0.479,0.45	0.446,0.389,0.4	0.086
3602	71807	Tars2	NC_000069.7	-	95653846	95654009	95654750	95654968	95653344	95653482	95655353	95655452	3602	107,59,57	125,43,29	117,94,85	39,34,57	367	312	3.19066e-14	5.78148e-13	0.421,0.538,0.626	0.718,0.702,0.559	-0.131
1936	110323	Cox6b1	NC_000073.7	-	30322839	30322940	30323924	30324038	30316395	30316587	30325475	30325539	1936	25814261367	319733133059	131613621597	330533713902	263	250	5.14092e-14	9.26899e-13	0.071,0.29,0.298	0.275,0.277,0.28	-0.058
1066	192187	Stab1	NC_000080.7	-	30878936	30879023	30879327	30879423	30877685	30877797	30879641	30879704	1066	27,30,21	35,32,17	34,35,49	24,18,26	245	236	5.84321e-14	1.04831e-12	0.426,0.475,0.543	0.577,0.652,0.645	-0.143
1906	327655	Ppip5k1	NC_000068.8	-	121153674	121153857	121157332	121157395	121152135	121152273	121158125	121158251	1906	25,10,10	12,15,17	6,5,16	23,16,40	212	332	1.03722e-13	1.85167e-12	0.765,0.511,0.479	0.29,0.329,0.385	0.25
2999	235184	Msantd2	NC_000075.7	+	37402751	37402865	37424909	37424999	37397033	37401129	37428668	37428768	2999	5,2,1	4,3,0	1,0,2	2,1,2	263	239	1.37622e-13	2.44481e-12	0.532,0.377,1.0	0.312,0.0,0.476	0.374
4194	26943	Serinc3	NC_000068.8	-	163478730	163478924	163481085	163481247	163476354	163476434	163486917	163487063	4194	61712521157	179712971459	107411061302	131911551407	311	343	1.40488e-13	2.48355e-12	0.275,0.516,0.467	0.473,0.514,0.505	-0.078
3807	22138	Ttn	NC_000068.8	-	76662131	76662218	76733406	76733970	76649079	76649160	76736597	76736876	3807	477334064057	43263289	121410871386	137113230	713	236	1.81877e-13	3.19962e-12	0.974,0.811,0.823	0.746,0.761,0.666	0.145
139	216964	Trp53i13	NC_000077.7	-	77403478	77403520	77403722	77403791	77400423	77400552	77403985	77404214	139	6,17,7	1,5,3	10,5,12	10,3,5	218	191	2.30411e-13	4.03387e-12	0.84,0.749,0.672	0.467,0.594,0.678	0.174
1115	68810	Nexn	NC_000069.7	-	151958687	151958766	151959248	151959440	151958444	151958593	151960921	151961002	1115	15613741244	153670561	13499591289	467408511	341	228	2.46972e-13	4.30301e-12	0.405,0.578,0.597	0.659,0.611,0.628	-0.106
3710	56448	Cyp2d22	NC_000081.7	-	82256985	82257127	82257311	82257488	82256590	82256778	82257873	82258034	3710	69,45,56	44,49,31	24,19,29	10,10,9	326	291	2.74028e-13	4.75157e-12	0.583,0.45,0.617	0.682,0.629,0.742	-0.134
399	77480	Kidins220	NC_000078.7	+	25091244	25091301	25097892	25097925	25090454	25090568	25101093	25101225	399	41,49,56	18,18,20	30,15,21	12,13,20	206	182	2.80185e-13	4.83519e-12	0.668,0.706,0.712	0.688,0.505,0.481	0.137
1399	244886	Tmem266	NC_000075.7	+	55287962	55288151	55305024	55305179	55234204	55234284	55307857	55307931	1399	3,2,0	6,6,3	7,3,0	2,5,6	338	304	3.35697e-13	5.76572e-12	0.31,0.231,0.0	0.759,0.35,0.0	-0.189
2913	327958	Pitpnm3	NC_000077.7	-	71983353	71983401	72003082	72003190	71965784	71965861	72010912	72011008	2913	0,8,3	4,0,1	0,0,0	0,1,3	257	197	3.77624e-13	6.45524e-12	0.0,1.0,0.697	NA,0.0,0.0	0.566
275	18028	Nfib	NC_000070.7	-	82228539	82228628	82238710	82238793	82208409	82215048	82245965	82246150	275	1,11,11	3,15,12	11,6,14	7,4,7	232	238	3.93967e-13	6.70298e-12	0.255,0.429,0.485	0.617,0.606,0.672	-0.242
1030	241066	Carf	NC_000067.7	+	60147241	60147359	60148380	60148608	60144469	60144593	60164009	60164070	1030	0,1,6	9,24,30	3,0,13	19,21,18	267	377	4.40493e-13	7.45956e-12	0.0,0.056,0.22	0.182,0.0,0.505	-0.137
4043	232807	Ppp1r12c	NC_000073.7	-	4485971	4486012	4486101	4486184	4485789	4485892	4486339	4486400	4043	55,74,62	71,69,51	49,40,56	20,32,41	232	190	6.23378e-13	1.05075e-11	0.388,0.468,0.499	0.667,0.506,0.528	-0.115
2317	212503	Paox	NC_000073.7	+	139708930	139709183	139711559	139711672	139697159	139697269	139712293	139712451	2317	5,5,5	14,5,7	0,3,1	6,3,3	402	262	9.55776e-13	1.60358e-11	0.189,0.395,0.318	0.0,0.395,0.178	0.11
2475	56705	Ranbp9	NC_000079.7	-	43578505	43578690	43583923	43583946	43574686	43574795	43588289	43588457	2475	28,10,15	30,11,21	8,8,12	22,16,21	172	334	1.31359e-12	2.19375e-11	0.644,0.638,0.581	0.414,0.493,0.526	0.143
2171	66815	Mcub	NC_000069.7	-	129712234	129712395	129720013	129720118	129710587	129710791	129727231	129727402	2171	6,0,1	8,0,8	4,2,10	4,4,9	254	310	1.85678e-12	3.08668e-11	0.478,NA,0.132	0.55,0.379,0.576	-0.197
2019	272589	Tbcel	NC_000075.7	-	42355702	42355884	42361219	42361359	42354114	42354371	42362908	42363058	2019	18,26,15	53,35,41	30,12,38	36,25,44	289	331	2.63726e-12	4.36412e-11	0.28,0.46,0.295	0.488,0.355,0.497	-0.102
3328	240753	Plekha6	NC_000067.7	+	133222300	133222446	133226657	133226781	133221691	133221825	133227446	133231169	3328	153159113	56,64,54	103,93,125	64,58,78	295	273	2.65978e-12	4.38139e-11	0.717,0.697,0.659	0.598,0.597,0.597	0.094
95	14950	H13	NC_000068.8	+	152530756	152530882	152531763	152531821	152530582	152530668	152533712	152533796	95	33,45,41	38,13,13	44,45,72	22,12,10	275	207	4.13445e-12	6.77974e-11	0.395,0.723,0.704	0.601,0.738,0.844	-0.12
899	54123	Irf7	NC_000073.7	-	140844405	140844568	140844637	140844696	140843571	140843961	140844987	140845204	899	3,6,0	1,1,6	4,11,3	1,1,3	208	312	4.16518e-12	6.79937e-11	0.818,0.9,0.0	0.857,0.943,0.6	-0.227
821	22404	Wiz	NC_000083.7	-	32597813	32598092	32600029	32600130	32595496	32597472	32606546	32606791	821	4,8,6	18,7,1	2,3,2	7,8,5	250	428	4.26666e-12	6.93379e-11	0.276,0.662,0.911	0.328,0.391,0.406	0.241
1412	102122	Psme3ip1	NC_000074.7	-	95318196	95318330	95323678	95323736	95315938	95316035	95328124	95328483	1412	0,2,0	0,2,1	1,3,1	0,2,0	207	283	4.65627e-12	7.53318e-11	NA,0.578,0.0	1.0,0.672,1.0	-0.602
867	56451	Suclg1	NC_000072.7	+	73233153	73233257	73237457	73237574	73225487	73225736	73240790	73241003	867	102406350	642623651	442476508	809771839	253	266	4.77693e-12	7.69404e-11	0.143,0.407,0.361	0.365,0.394,0.389	-0.079
3999	64291	Osbpl1a	NC_000084.7	-	12921376	12921452	12952561	12952718	12904355	12904490	12974240	12974403	3999	126122109	83,62,63	115106121	41,43,48	306	225	5.0424e-12	8.08569e-11	0.527,0.591,0.56	0.673,0.644,0.65	-0.096
1290	16439	Itpr2	NC_000072.7	-	146226488	146226740	146228591	146228792	146224608	146224734	146229792	146229915	1290	59,55,45	91,54,69	53,28,70	40,55,26	350	401	5.72054e-12	9.1327e-11	0.426,0.539,0.428	0.603,0.368,0.755	-0.111
3197	67154	Mtdh	NC_000081.7	+	34118025	34118256	34131309	34131434	34099629	34099731	34134436	34134544	3197	175,64,72	42102102	80,65,71	85,97,94	380	274	6.22909e-12	9.90098e-11	0.75,0.311,0.337	0.404,0.326,0.353	0.105
3484	53599	Cd164	NC_000076.7	+	41397913	41398003	41399168	41399240	41395495	41395696	41400102	41400141	3484	26111120	70151160	165106142	134136159	239	221	6.37765e-12	1.00928e-10	0.256,0.405,0.41	0.532,0.419,0.452	-0.111
3515	381236	Lipo3	NC_000085.7	-	33562269	33562375	33565600	33565743	33560446	33560564	33567290	33568069	3515	6,5,9	19,18,13	11,10,12	15,16,12	292	255	9.75848e-12	1.5376e-10	0.216,0.195,0.377	0.39,0.353,0.466	-0.14
1907	117600	Srgap1	NC_000076.7	-	121664633	121664667	121665131	121665234	121661538	121661599	121667789	121667817	1907	4,1,3	0,2,1	8,3,0	3,7,0	252	183	1.06768e-11	1.67501e-10	1.0,0.266,0.685	0.659,0.237,NA	0.202
770	102693	Phldb1	NC_000075.7	-	44612242	44612383	44612799	44612967	44610852	44610993	44614389	44614533	770	13,16,14	90,73,60	33,30,52	89,70,83	317	290	1.07901e-11	1.68549e-10	0.117,0.167,0.176	0.253,0.282,0.364	-0.146
1384	26457	Slc27a1	NC_000074.7	+	72021985	72022092	72022839	72022956	72021514	72021681	72023364	72023532	1384	6,9,13	4,13,2	24,12,19	6,9,2	256	266	1.2081e-11	1.87904e-10	0.609,0.418,0.871	0.806,0.581,0.908	-0.132
3177	78232	Trappc6b	NC_000078.7	-	59091038	59091132	59094908	59094992	59089877	59090462	59097053	59097171	3177	80,88,89	143106108	85,62,86	90,56,73	233	243	1.26538e-11	1.95972e-10	0.368,0.464,0.462	0.496,0.536,0.551	-0.096
1689	109778	Blvra	NC_000068.8	+	126924851	126924970	126927882	126928002	126922449	126922578	126928764	126928862	1689	33,18,28	44,52,36	17,46,28	31,31,29	268	269	1.2853e-11	1.9821e-10	0.429,0.258,0.438	0.355,0.598,0.492	-0.107
4233	24017	Rnf13	NC_000069.7	+	57671677	57671803	57686803	57686929	57643477	57643621	57703618	57703706	4233	97219203	346215192	201170201	166168232	275	275	1.30641e-11	2.00612e-10	0.219,0.505,0.514	0.548,0.503,0.464	-0.092
1514	74376	Myo18b	NC_000071.7	-	112864852	112864897	112871672	112871803	112863246	112863384	112905320	112905506	1514	250310281	85,79,66	406386473	59,71,93	280	194	1.34688e-11	2.05953e-10	0.671,0.731,0.747	0.827,0.79,0.779	-0.082
3408	102093	Phkb	NC_000074.7	+	86751826	86751917	86753085	86753176	86750909	86750967	86756110	86756313	3408	0,4,11	69,79,79	40,43,45	90124117	240	240	1.49305e-11	2.27344e-10	0.0,0.048,0.122	0.308,0.257,0.278	-0.224
2224	13876	Erg	NC_000082.7	-	95170853	95170922	95178159	95178231	95170180	95170237	95179970	95180051	2224	13,4,5	20,16,16	28,8,16	13,7,26	221	218	1.88475e-11	2.84993e-10	0.391,0.198,0.236	0.68,0.53,0.378	-0.254
575	54169	Kat6b	NC_000080.7	+	21672022	21672155	21674900	21674956	21669285	21669367	21676786	21676908	575	23,45,36	4,13,6	19,21,11	1,5,0	282	205	1.88737e-11	2.84993e-10	0.807,0.716,0.813	0.932,0.753,1.0	-0.116
123	17920	Myo6	NC_000075.7	+	80159048	80159129	80165694	80165839	80153676	80153841	80168060	80168218	123	15,18,24	23,36,27	20,8,19	19,12,10	230	294	1.9012e-11	2.8589e-10	0.455,0.39,0.532	0.574,0.46,0.708	-0.122
2208	382913	Neil2	NC_000080.7	-	63428907	63429134	63429153	63429307	63425889	63426230	63431055	63431604	2208	0,1,0	4,0,1	1,2,2	0,0,3	303	376	1.92512e-11	2.8829e-10	0.0,1.0,0.0	1.0,1.0,0.453	-0.484
3640	217830	Dglucy	NC_000078.7	+	100752396	100752505	100753874	100753931	100745315	100745569	100795857	100795984	3640	0,3,2	7,3,2	8,5,6	0,0,0	258	206	2.02202e-11	3.01556e-10	0.0,0.444,0.444	1.0,1.0,1.0	-0.704
135	16553	Kif13a	NC_000079.7	-	46913738	46913780	46914138	46914243	46905556	46906348	46914748	46914900	135	0,14,14	1,0,1	5,2,13	17,16,17	254	191	2.27517e-11	3.37918e-10	0.0,1.0,0.913	0.181,0.086,0.365	0.427
576	54169	Kat6b	NC_000080.7	+	21672022	21672155	21674900	21675829	21669285	21669367	21676786	21676908	576	23,45,36	91187160	19,21,11	130,93,188	282	1078	2.29692e-11	3.39756e-10	0.491,0.479,0.462	0.358,0.463,0.183	0.143
134	73225	Fam118a	NC_000081.7	+	84943589	84943671	84944289	84944390	84942942	84943026	84945732	84947031	134	0,0,0	5,2,3	6,0,1	0,0,0	231	250	2.38983e-11	3.51002e-10	0.0,0.0,0.0	1.0,NA,1.0	-1
146	52184	Odf2l	NC_000069.7	+	144845544	144845655	144850072	144850177	144842348	144842484	144854291	144854377	146	9,10,18	21,17,11	12,8,12	11,11,1	260	254	2.39231e-11	3.51002e-10	0.295,0.365,0.615	0.516,0.415,0.921	-0.192
1422	94254	Rcc1l	NC_000071.7	-	134184578	134184752	134186429	134186517	134182962	134183048	134192462	134192644	1422	78,18,28	53,48,34	22,15,13	39,38,36	237	323	2.64941e-11	3.87156e-10	0.667,0.338,0.529	0.435,0.35,0.33	0.14
4145	70951	Spata1	NC_000069.7	-	146171663	146171751	146173860	146173959	146168939	146169010	146175379	146175558	4145	0,3,5	5,1,2	2,4,2	0,2,2	248	237	2.66332e-11	3.87625e-10	0.0,0.741,0.705	1.0,0.657,0.489	-0.233
1762	102323	Dcun1d2	NC_000074.7	-	13311384	13311467	13321589	13321720	13305962	13307976	13337803	13338126	1762	9,5,9	0,0,0	1,2,7	3,5,6	280	232	2.71989e-11	3.94275e-10	1.0,1.0,1.0	0.216,0.249,0.492	0.681
1195	227801	Dennd1a	NC_000068.8	-	38026937	38026987	38049818	38049862	38016540	38016660	38133413	38133484	1195	21,28,19	16,15,8	19,17,15	15,16,22	193	199	2.87369e-11	4.14911e-10	0.575,0.658,0.71	0.566,0.523,0.413	0.147
2668	72895	Setd5	NC_000072.7	+	113082877	113083102	113086384	113086577	113081895	113082082	113086845	113086951	2668	77,70,73	31,19,34	39,38,26	31,16,20	374	342	3.78636e-11	5.44515e-10	0.694,0.771,0.663	0.535,0.685,0.543	0.122
1480	56736	Rnf14	NC_000084.7	+	38430552	38430628	38431361	38431448	38429653	38429851	38432806	38432979	1480	3,4,7	30,8,17	7,11,11	24,17,18	225	236	4.91391e-11	7.03874e-10	0.095,0.344,0.302	0.234,0.404,0.391	-0.096
1746	70676	Gulp1	NC_000067.7	+	44793502	44793601	44805173	44805311	44783633	44783705	44812430	44812547	1746	8,13,12	23,13,13	11,5,10	5,5,11	248	287	5.4696e-11	7.80387e-10	0.287,0.536,0.516	0.718,0.536,0.513	-0.143
3541	214444	Cdk5rap2	NC_000070.7	-	70255577	70255796	70267380	70267482	70235663	70235834	70270905	70271025	3541	0,9,9	4,34,13	19,12,16	9,14,25	251	368	6.16041e-11	8.75503e-10	0.0,0.28,0.504	0.756,0.557,0.484	-0.338
3004	225994	Nmrk1	NC_000085.7	+	18613442	18613506	18616881	18616972	18609379	18609445	18617249	18617298	3004	1,3,7	4,5,3	3,6,4	0,0,7	213	240	6.77766e-11	9.59462e-10	0.22,0.403,0.724	1.0,1.0,0.392	-0.348
1198	227801	Dennd1a	NC_000068.8	-	38049818	38049862	38133413	38133484	38026937	38026987	38177124	38177416	1198	10,13,20	28,17,22	27,24,22	28,21,19	220	193	7.34347e-11	1.03551e-09	0.239,0.402,0.444	0.458,0.501,0.504	-0.126
1339	21763	Tex2	NC_000077.7	-	106420087	106420187	106424696	106424843	106410707	106410840	106434997	106435245	1339	98,87,61	122,38,32	97,67,107	39,39,49	296	249	8.74767e-11	1.22874e-09	0.403,0.658,0.616	0.677,0.591,0.648	-0.08
8	75698	Shld2	NC_000080.7	-	33981581	33981689	33989457	33990909	33971133	33971328	34030996	34031051	8	132136142	11,5,14	99,82,127	11,5,24	1601	257	1.0995e-10	1.53845e-09	0.658,0.814,0.62	0.591,0.725,0.459	0.106
1799	214597	Sidt2	NC_000075.7	-	45858838	45858850	45858926	45858995	45858281	45858353	45859133	45859186	1799	15,4,1	1,0,2	1,5,15	15,6,0	218	161	1.11767e-10	1.55786e-09	0.917,1.0,0.27	0.047,0.381,1.0	0.253
326	18452	P4ha2	NC_000077.7	+	54017063	54017123	54017171	54017237	54016588	54016642	54019873	54019942	326	33,32,22	18,26,38	28,37,38	49,54,92	209	215	1.14355e-10	1.58783e-09	0.653,0.559,0.373	0.37,0.413,0.298	0.168
4452	72183	Snx6	NC_000078.7	-	54810404	54810510	54812368	54812464	54807183	54807259	54814803	54814927	4452	62,65,58	115,53,46	62,44,51	35,42,38	245	255	1.21425e-10	1.67956e-09	0.359,0.561,0.568	0.648,0.522,0.583	-0.088
2045	227197	Ndufs1	NC_000067.7	-	63205449	63205526	63208387	63208495	63204107	63204189	63209208	63209300	2045	1154736654	406639577	794792919	761660799	257	226	1.30616e-10	1.79981e-09	0.714,0.503,0.499	0.478,0.513,0.503	0.074
658	76799	Tmem234	NC_000070.7	+	129495199	129495326	129495662	129495754	129494775	129494927	129495987	129496054	658	6,5,4	12,6,2	1,2,1	2,10,4	276	241	1.63369e-10	2.24262e-09	0.304,0.421,0.636	0.304,0.149,0.179	0.243
3612	11472	Actn2	NC_000079.7	-	12287584	12287650	12289963	12290110	12285663	12285822	12291248	12291428	3612	90931503506	330422252069	230022122793	146815211837	296	215	1.71199e-10	2.34123e-09	0.167,0.507,0.552	0.532,0.514,0.525	-0.115
3423	17906	Myl2	NC_000071.7	+	122231890	122231913	122232709	122232821	122231251	122231758	122234730	122234851	3423	3,1,6	70,82,46	8,8,10	71,83,60	172	261	5.69276e-10	7.75586e-09	0.061,0.018,0.165	0.146,0.128,0.202	-0.077
111	21886	Tle2	NC_000076.7	+	81424642	81424793	81425253	81425330	81423707	81423855	81426058	81426299	111	17,16,14	5,12,10	4,5,10	7,5,9	300	226	5.7579e-10	7.81522e-09	0.719,0.501,0.513	0.301,0.43,0.456	0.182
816	14245	Lpin1	NC_000078.7	-	16630704	16630905	16662553	16662610	16629882	16629978	16696837	16697020	816	21,115,81	384376332	194185189	451483582	206	350	6.27175e-10	8.4809e-09	0.085,0.342,0.293	0.422,0.394,0.356	-0.151
4170	68842	Tulp4	NC_000083.7	+	6235411	6235573	6251974	6252109	6227103	6227232	6257165	6257332	4170	186,72,70	64,41,48	81,71,85	33,68,70	311	284	7.25388e-10	9.77251e-09	0.726,0.616,0.571	0.691,0.488,0.526	0.069
1440	67869	Paip2	NC_000084.7	+	35743923	35744087	35746375	35746555	35731669	35731812	35749251	35750239	1440	54474458	497428489	513448458	494462520	313	329	8.47939e-10	1.13812e-08	0.102,0.538,0.496	0.522,0.505,0.481	-0.124
4316	19885	Rorc	NC_000069.7	+	94297706	94298513	94298951	94299062	94296781	94296903	94300337	94300447	4316	56,63,34	32,29,44	16,30,63	40,43,41	956	260	9.9272e-10	1.32753e-08	0.322,0.371,0.174	0.098,0.159,0.295	0.105
3771	22138	Ttn	NC_000068.8	-	76688247	76688331	76692455	76692533	76681898	76682108	76692693	76692771	3771	277366319	3931102865	113107152	666703799	227	233	1.29629e-09	1.72712e-08	0.42,0.254,0.275	0.148,0.135,0.163	0.168
2016	66826	Taz	NC_000086.8	+	73327537	73327623	73331624	73331705	73327253	73327299	73331783	73331825	2016	67,47,51	72,37,31	35,52,65	15,30,39	235	230	1.53432e-09	2.03677e-08	0.477,0.554,0.617	0.695,0.629,0.62	-0.099
3453	102637248	Gm34114	NC_000076.7	-	97237802	97237923	97245186	97245310	97224619	97226770	97264202	97264445	3453	2,0,9	3,0,0	12,5,9	7,1,1	273	270	2.39185e-09	3.16353e-08	0.397,NA,1.0	0.629,0.832,0.899	-0.088
1278	19070	Mob4	NC_000067.7	+	55175835	55175898	55184282	55184383	55170403	55170518	55187477	55187520	1278	3,13,8	134,88,95	16,11,16	79,78,103	212	250	2.57607e-09	3.3948e-08	0.026,0.148,0.09	0.193,0.143,0.155	-0.076
1448	76967	2700049A03Rik	NC_000078.7	+	71201535	71201697	71203820	71203944	71199423	71199571	71205601	71205731	1448	3,17,18	6,9,14	12,12,14	9,2,5	311	273	2.76537e-09	3.63105e-08	0.305,0.624,0.53	0.539,0.84,0.711	-0.21
375	208177	Phldb2	NC_000082.7	-	45594525	45594708	45595306	45595381	45592497	45592638	45598075	45598165	375	8,8,4	19,32,42	3,0,0	16,2,12	224	332	3.14932e-09	4.12027e-08	0.384,0.27,0.124	0.217,0.0,0.0	0.187
843	631624	Gm7072	NC_000083.7	-	22511388	22511436	22528485	22528578	22508749	22508876	22532217	22532301	843	0,9,25	1,11,6	16,15,11	11,8,12	242	197	3.17168e-09	4.1346e-08	0.0,0.4,0.772	0.542,0.604,0.427	-0.134
1975	99412	Golga2	NC_000068.8	+	32187765	32187846	32188611	32188650	32187532	32187589	32188897	32188960	1975	71,68,67	20,84,79	54,39,52	61,55,91	230	188	4.58772e-09	5.9591e-08	0.744,0.398,0.409	0.42,0.367,0.318	0.149
4053	71599	Senp8	NC_000075.7	-	59647222	59647315	59657544	59657654	59641541	59645151	59657860	59657932	4053	0,1,2	6,2,0	3,2,0	6,5,13	259	242	5.2479e-09	6.79228e-08	0.0,0.318,1.0	0.318,0.272,0.0	0.243
3930	50767	Pnpla6	NC_000074.7	+	3587766	3587883	3587968	3588085	3587450	3587520	3591290	3591592	3930	19,5,16	2,11,0	8,1,4	4,5,4	266	266	5.288e-09	6.81982e-08	0.905,0.313,1.0	0.667,0.167,0.5	0.295
3819	22138	Ttn	NC_000068.8	-	76724485	76724767	76728406	76728685	76723242	76723521	76728788	76729067	3819	7988701062	189616171948	465455556	444427537	428	431	6.10284e-09	7.8428e-08	0.298,0.351,0.354	0.513,0.518,0.51	-0.179
379	74106	Dcaf6	NC_000067.7	-	165219707	165219801	165227222	165227437	165217982	165218102	165239032	165239168	379	305139135	74,83,76	148165173	98132121	364	243	6.68137e-09	8.55594e-08	0.733,0.528,0.543	0.502,0.455,0.488	0.12
3773	22138	Ttn	NC_000068.8	-	76688247	76688331	76692455	76692533	76647332	76647419	76692693	76692771	3773	277365319	332910729	113107153	538560634	227	233	7.88531e-09	1.00621e-07	0.461,0.292,0.31	0.177,0.164,0.199	0.174
486	106200	Txndc11	NC_000082.7	-	10922429	10922523	10934658	10934788	10909449	10909650	10940533	10940631	486	55,40,33	15,3,3	27,30,36	16,8,5	279	243	8.85552e-09	1.12605e-07	0.762,0.921,0.905	0.595,0.766,0.862	0.122
2757	93686	Rbfox2	NC_000081.7	-	76976011	76976054	76978650	76978690	76974061	76974093	76982139	76982272	2757	0,4,4	14,23,22	3,8,10	27,22,31	189	192	9.80909e-09	1.24294e-07	0.0,0.15,0.156	0.101,0.27,0.247	-0.104
882	330814	Adgrl1	NC_000074.7	+	84652890	84652905	84655296	84655520	84649627	84649737	84656092	84656893	882	0,0,0	2,10,8	0,8,4	11,7,1	164	373	1.13223e-08	1.42968e-07	0.0,0.0,0.0	0.0,0.722,0.901	-0.541
4455	20174	Ruvbl2	NC_000073.7	-	45079332	45079388	45080743	45080798	45078877	45079019	45083675	45083888	4455	16,13,14	27,24,25	15,11,19	14,14,20	204	205	1.19288e-08	1.50104e-07	0.373,0.352,0.36	0.518,0.441,0.488	-0.121
3896	381668	Fbrsl1	NC_000071.7	-	110529466	110529512	110543910	110543940	110527134	110527459	110563895	110563931	3896	29,12,23	15,14,15	9,11,11	28,22,19	179	195	1.29389e-08	1.62251e-07	0.678,0.483,0.626	0.259,0.353,0.387	0.263
1226	66106	Smpx	NC_000086.8	+	156497582	156497669	156503926	156504075	156485951	156486008	156534590	156534625	1226	135534559	77410781074	517471575	869846995	236	298	1.50194e-08	1.87691e-07	0.18,0.385,0.397	0.429,0.413,0.422	-0.101
4158	76375	Det1	NC_000073.7	-	78477319	78477412	78477516	78477860	78472703	78473008	78483858	78484050	4158	21,40,30	3,4,3	27,30,46	12,4,14	493	242	1.59078e-08	1.9811e-07	0.775,0.831,0.831	0.525,0.786,0.617	0.17
650	21985	Tpd52	NC_000069.7	-	9001498	9001540	9008610	9008637	9000051	9000100	9009670	9009772	650	10,9,7	1,3,3	6,7,3	3,0,0	176	191	1.65233e-08	2.0507e-07	0.916,0.765,0.717	0.685,1.0,1.0	-0.096
3770	22138	Ttn	NC_000068.8	-	76688247	76688331	76692455	76692533	76630826	76630924	76692693	76692771	3770	277367319	329913729	113107152	527551617	227	233	1.83001e-08	2.26346e-07	0.464,0.292,0.31	0.18,0.166,0.202	0.173
4054	71599	Senp8	NC_000075.7	-	59647222	59647334	59657544	59657654	59641541	59645151	59657860	59657932	4054	0,1,2	6,2,0	3,2,0	4,6,9	259	261	1.99965e-08	2.46487e-07	0.0,0.335,1.0	0.43,0.251,0.0	0.218
498	219132	Phf11d	NC_000080.7	-	59588595	59588667	59590099	59590231	59586670	59586837	59590766	59590830	498	20,12,16	4,3,7	19,9,11	8,4,9	281	221	2.11797e-08	2.60187e-07	0.797,0.759,0.643	0.651,0.639,0.49	0.14
885	330814	Adgrl1	NC_000074.7	+	84652890	84652905	84655296	84655524	84649627	84649737	84656092	84656893	885	0,0,0	2,10,8	0,8,4	11,8,2	164	377	2.14062e-08	2.62081e-07	0.0,0.0,0.0	0.0,0.697,0.821	-0.506
1142	20843	Stag2	NC_000086.8	+	41239576	41239965	41256584	41256633	41239017	41239168	41290731	41290871	1142	2,31,10	2,3,0	9,23,10	0,0,2	538	198	2.18749e-08	2.66918e-07	0.269,0.792,1.0	1.0,1.0,0.648	-0.196
3290	56433	Vps29	NC_000071.7	+	122498075	122498267	122500098	122500334	122492390	122492539	122500867	122503047	3290	89151127	263185209	144111151	171151198	341	385	2.36594e-08	2.87724e-07	0.276,0.48,0.407	0.487,0.454,0.463	-0.08
1887	66897	Naa16	NC_000080.7	-	79582334	79582548	79588128	79588270	79580565	79580759	79588812	79588941	1887	19,8,5	13,22,23	5,5,5	15,38,26	291	363	2.66613e-08	3.23146e-07	0.646,0.312,0.213	0.294,0.141,0.193	0.181
25	14423	Galnt1	NC_000084.7	+	24371298	24371542	24379106	24379281	24339050	24339137	24387574	24387741	25	147,91,96	187157174	62,94,99	220174184	393	324	2.984e-08	3.60468e-07	0.393,0.323,0.313	0.189,0.308,0.307	0.075
3180	14276	Folr2	NC_000073.7	-	101490018	101490204	101492874	101493031	101489797	101489933	101494410	101494538	3180	10,28,14	26,17,15	33,41,46	32,17,15	306	335	3.36725e-08	4.05412e-07	0.296,0.643,0.505	0.53,0.725,0.771	-0.194
2874	67725	Nudt13	NC_000080.7	+	20345155	20345334	20347582	20347699	20344757	20344860	20350654	20350747	2874	27,42,47	1,0,3	45,40,47	5,6,3	328	266	3.66777e-08	4.39991e-07	0.956,1.0,0.927	0.88,0.844,0.927	0.077
3040	224440	Setd4	NC_000082.7	-	93386586	93386798	93386798	93386973	93384706	93384788	93387761	93388191	3040	9,6,3	2,3,0	1,1,0	0,7,9	324	361	3.67873e-08	4.39991e-07	0.834,0.69,1.0	1.0,0.137,0.0	0.462
550	13480	Dpm1	NC_000068.8	-	168054879	168054948	168059600	168059696	168053285	168053400	168061139	168061165	550	70138133	71,87,96	131111133	56,74,68	245	218	4.10157e-08	4.8895e-07	0.467,0.585,0.552	0.675,0.572,0.635	-0.093
1804	228071	Sestd1	NC_000068.8	-	77071944	77072065	77075360	77075430	77064992	77065083	77110898	77111160	1804	0,5,3	0,0,3	3,3,6	2,1,1	219	270	4.13074e-08	4.89209e-07	NA,1.0,0.552	0.649,0.787,0.881	0.004
4441	19286	Pts	NC_000075.7	-	50436561	50436584	50439445	50439532	50436022	50436079	50439856	50440016	4441	4,8,11	14,21,18	29,14,24	12,12,17	236	172	4.13041e-08	4.89209e-07	0.172,0.217,0.308	0.638,0.46,0.507	-0.303
3239	225289	AW554918	NC_000084.7	+	25477920	25478019	25532982	25533164	25472770	25473441	25553023	25553132	3239	18,16,15	8,2,14	6,6,4	9,1,8	248	331	4.74767e-08	5.60442e-07	0.75,0.914,0.588	0.471,0.889,0.4	0.164
3668	12288	Cacna1c	NC_000072.7	-	118651306	118651366	118651515	118651575	118647310	118647417	118652780	118652910	3668	98,159,37	333334349	120,105,94	230210256	209	209	5.12145e-08	6.02602e-07	0.227,0.323,0.096	0.343,0.333,0.269	-0.1
9	234371	Tmem161a	NC_000074.7	+	70629890	70629988	70630101	70630258	70629494	70629575	70631516	70631668	9	80,93,70	164,90,83	119,81,99	87,72,97	247	306	5.95745e-08	6.987e-07	0.377,0.561,0.511	0.629,0.582,0.558	-0.107
884	330814	Adgrl1	NC_000074.7	+	84652890	84652905	84655296	84655570	84649627	84649737	84656092	84656893	884	0,0,0	2,11,9	0,8,4	14,11,3	164	423	6.28005e-08	7.34158e-07	0.0,0.0,0.0	0.0,0.652,0.775	-0.476
1241	67876	Coq10b	NC_000067.7	+	55100433	55100583	55103339	55103532	55091928	55092149	55106655	55106757	1241	142142141	341,110,81	250263286	176194207	299	342	6.79011e-08	7.88785e-07	0.323,0.596,0.666	0.619,0.608,0.612	-0.085
3634	103583	Fbxw11	NC_000077.7	+	32602747	32602904	32630200	32630302	32592554	32592935	32658187	32658250	3634	35,19,36	8,15,17	44,23,45	3,13,1	306	251	6.79086e-08	7.88785e-07	0.782,0.51,0.635	0.923,0.592,0.974	-0.187
2510	20411	Sorbs1	NC_000085.7	-	40349485	40349548	40349872	40349947	40340961	40341009	40351645	40351709	2510	37,61,75	16,26,15	75167165	19,17,10	224	212	7.08607e-08	8.20444e-07	0.686,0.689,0.826	0.789,0.903,0.94	-0.144
3421	320162	Cep95	NC_000077.7	+	106695818	106695947	106697061	106697255	106692288	106692404	106700017	106700127	3421	12,5,9	36,28,31	7,10,7	20,10,19	278	343	7.17724e-08	8.28355e-07	0.291,0.181,0.264	0.302,0.552,0.313	-0.144
2706	66860	Tanc1	NC_000068.8	+	59555004	59555193	59588808	59588913	59529691	59529771	59601475	59601660	2706	180,98,102	42,49,63	47,53,60	39,34,43	338	254	7.30874e-08	8.40853e-07	0.763,0.6,0.549	0.475,0.539,0.512	0.129
2665	270627	Taf1	NC_000086.8	+	100621805	100621898	100621977	100622062	100620186	100620309	100633553	100633621	2665	38,12,29	42,12,15	24,17,20	11,7,15	242	234	7.58409e-08	8.69771e-07	0.467,0.492,0.651	0.678,0.701,0.563	-0.111
1106	19346	Rab6a	NC_000073.7	+	100278872	100278978	100279044	100279150	100277610	100277664	100280948	100281060	1106	90,105,79	53238201	59,70,116	250245252	255	255	7.75752e-08	8.86853e-07	0.629,0.306,0.282	0.191,0.222,0.315	0.163
3441	77087	Ankrd11	NC_000074.7	-	123642639	123642784	123701467	123701531	123635406	123635545	123768687	123769023	3441	93,58,44	50130142	23,24,86	135140171	213	294	7.83508e-08	8.92903e-07	0.72,0.381,0.3	0.19,0.191,0.41	0.203
2914	93736	Aff4	NC_000077.7	+	53266415	53266460	53271412	53271499	53263104	53263884	53280581	53280618	2914	52,43,58	37,50,55	31,35,37	54,38,49	194	236	1.09477e-07	1.24372e-06	0.631,0.511,0.562	0.411,0.528,0.479	0.095
1344	207921	Fam228b	NC_000078.7	-	4791061	4791207	4794469	4794606	4789887	4790043	4795651	4795756	1344	2,0,1	0,2,5	3,0,1	5,4,1	286	295	1.13497e-07	1.28536e-06	1.0,0.0,0.171	0.382,0.0,0.508	0.094
40	218699	Pxk	NC_000080.7	-	14314427	14314490	14317622	14317692	14304655	14305838	14318191	14318278	40	18,33,21	5,15,20	12,10,22	14,13,13	219	212	1.39532e-07	1.57528e-06	0.777,0.68,0.504	0.453,0.427,0.621	0.153
3410	102093	Phkb	NC_000074.7	+	86569632	86569741	86601645	86601707	86567616	86567732	86602262	86602352	3410	5,2,3	1,4,0	2,0,2	2,1,1	258	211	1.55594e-07	1.75116e-06	0.804,0.29,1.0	0.45,0.0,0.621	0.341
2899	211586	Tfdp2	NC_000075.7	+	96155891	96155995	96169653	96169775	96114734	96114801	96177017	96177180	2899	33,60,61	10,30,29	56,51,77	53,40,52	253	271	1.62868e-07	1.82735e-06	0.779,0.682,0.693	0.531,0.577,0.613	0.144
3281	233246	Ano5	NC_000073.7	+	51187469	51187583	51194538	51194607	51185195	51185237	51196409	51196694	3281	3,1,2	0,0,0	19,14,16	6,5,7	263	218	2.29866e-07	2.5711e-06	1.0,1.0,1.0	0.724,0.699,0.655	0.307
3029	83997	Slmap	NC_000080.7	-	26174692	26174755	26180564	26180615	26163729	26163789	26181058	26181109	3029	84105102	7,14,26	62,58,78	22,13,37	200	212	2.42345e-07	2.70233e-06	0.927,0.888,0.806	0.749,0.825,0.691	0.119
1868	72194	Fbxl20	NC_000077.7	-	97989245	97989320	97990808	97990935	97987754	97987885	97992526	97992622	1868	65,56,36	31,37,36	41,24,23	30,28,29	276	224	2.45565e-07	2.72984e-06	0.63,0.551,0.448	0.526,0.41,0.392	0.1
731	12121	Bicd1	NC_000072.7	+	149421850	149422044	149451837	149451923	149420403	149420611	149458141	149464218	731	0,4,2	3,1,3	1,7,1	3,0,2	343	235	2.51751e-07	2.79005e-06	0.0,0.733,0.314	0.186,1.0,0.255	-0.131
2294	17470	Cd200	NC_000082.7	-	45214955	45215223	45217331	45217658	45212607	45212751	45229218	45229419	2294	138198178	368200174	177155157	143146178	476	417	2.64148e-07	2.91851e-06	0.247,0.464,0.473	0.52,0.482,0.436	-0.085
1098	109079	Sephs1	NC_000068.8	+	4893993	4894097	4896397	4896505	4889142	4889416	4897995	4898150	1098	41,16,28	6,15,21	12,12,15	18,7,8	253	257	2.89141e-07	3.18494e-06	0.874,0.52,0.575	0.404,0.635,0.656	0.091
4045	13806	Eno1	NC_000070.7	+	150326223	150326282	150326578	150326637	150325501	150325597	150328461	150328531	4045	222331274	105131108	311276303	78,66,63	208	208	3.00544e-07	3.30052e-06	0.679,0.716,0.717	0.799,0.807,0.828	-0.107
3299	331524	Xkrx	NC_000086.8	-	133057961	133058230	133077005	133077879	133049785	133052045	133086045	133086743	3299	8,5,3	14,9,7	0,2,8	0,3,5	1023	418	3.01555e-07	3.30162e-06	0.189,0.185,0.149	NA,0.214,0.395	-0.13
3031	22068	Trpc6	NC_000075.7	+	8643506	8643723	8649298	8649532	8634047	8634212	8652936	8653201	3031	2,1,6	0,2,5	2,1,1	2,10,0	366	383	3.03019e-07	3.30765e-06	1.0,0.343,0.557	0.511,0.095,1.0	0.098
2422	67878	Tmem33	NC_000071.7	+	67425853	67425987	67441482	67441566	67424644	67424712	67443438	67443559	2422	92,54,46	43,37,39	46,72,87	50,63,71	283	233	3.08648e-07	3.35898e-06	0.638,0.546,0.493	0.431,0.485,0.502	0.086
3362	78938	Fbxo34	NC_000080.7	+	47744721	47744903	47763661	47763771	47742442	47742589	47766631	47769419	3362	3,3,5	11,9,6	3,0,0	10,6,19	331	259	3.17746e-07	3.44764e-06	0.176,0.207,0.395	0.19,0.0,0.0	0.196
2490	218793	Ube2e2	NC_000080.7	+	3839264	3839397	3882697	3882845	3598151	3598202	3895304	3896133	2490	26,22,27	51,33,33	34,13,19	21,13,33	282	297	3.96092e-07	4.28489e-06	0.349,0.413,0.463	0.63,0.513,0.377	-0.098
281	100986	Akap9	NC_000071.7	+	4081110	4081149	4082680	4082913	4079839	4080052	4084747	4084867	281	8,11,10	83163149	17,15,16	131112117	188	382	4.3877e-07	4.73245e-06	0.164,0.121,0.12	0.209,0.214,0.217	-0.078
4000	64291	Osbpl1a	NC_000084.7	-	12921376	12921452	12952561	12952718	12904355	12904490	12995163	12996112	4000	63,83,62	83,59,60	81,48,67	41,43,48	306	225	4.43225e-07	4.76632e-06	0.358,0.508,0.432	0.592,0.451,0.507	-0.084
449	67009	Ttc23	NC_000073.7	+	67301670	67301719	67310430	67310748	67297033	67297593	67312074	67312274	449	5,2,0	1,2,4	0,1,0	2,3,7	198	467	4.6094e-07	4.94215e-06	0.922,0.702,0.0	0.0,0.44,0.0	0.395
2792	101490	Inpp5f	NC_000073.7	+	128292350	128292422	128293475	128293549	128286809	128287008	128293977	128294106	2792	2,4,1	6,5,3	2,5,0	2,3,1	221	223	4.85961e-07	5.19506e-06	0.252,0.447,0.252	0.502,0.627,0.0	-0.059
895	74006	Dnm1l	NC_000082.7	-	16136308	16136341	16136627	16136705	16134465	16134642	16137315	16137372	895	72,70,97	14,23,31	84,63,63	12,11,13	227	182	6.59785e-07	7.03253e-06	0.805,0.709,0.715	0.849,0.821,0.795	-0.079
2168	66273	Aamdc	NC_000073.7	-	97214357	97214507	97224794	97224898	97199537	97199948	97228572	97228704	2168	71,75,58	86,77,67	77,83,120	51,69,72	253	299	8.8818e-07	9.43919e-06	0.494,0.535,0.506	0.641,0.587,0.663	-0.119
2075	26374	Cop1	NC_000067.7	+	159112117	159112232	159116474	159116610	159105658	159105716	159134142	159134286	2075	35107103	0,0,0	134109125	0,118,0	264	285	9.31481e-07	9.87043e-06	1.0,1.0,1.0	1.0,0.499,1.0	0.167
1155	504193	Npcd	NC_000081.7	-	79712888	79713179	79717712	79717779	79678456	79678676	79717902	79717968	1155	1,29,10	45,71,47	24,19,16	53,32,40	216	440	1.0606e-06	1.12059e-05	0.043,0.454,0.302	0.48,0.547,0.449	-0.226
271	18028	Nfib	NC_000070.7	-	82238710	82238793	82241781	82241947	82208409	82215048	82245965	82246150	271	11,36,28	1,11,11	8,19,32	11,6,14	315	232	1.15573e-06	1.21755e-05	0.89,0.707,0.652	0.349,0.7,0.627	0.191
1973	30056	Timm9	NC_000078.7	-	71179280	71179416	71180673	71180771	71178774	71178860	71183328	71183449	1973	0,6,2	0,3,3	3,0,0	0,1,3	247	285	1.54551e-06	1.62346e-05	NA,0.698,0.435	1.0,0.0,0.0	0.233
1018	14013	Mecom	NC_000069.7	-	30041178	30041326	30047634	30047851	30039489	30039643	30051794	30051897	1018	47,29,43	32,11,14	21,32,27	8,7,7	366	297	1.74218e-06	1.82476e-05	0.544,0.681,0.714	0.681,0.788,0.758	-0.096
494	109676	Ank2	NC_000069.7	-	127041782	127041881	127132780	127132841	126898409	126898511	127202493	127202748	494	5,11,15	27,26,23	18,16,25	21,0,17	210	248	1.76045e-06	1.83858e-05	0.179,0.333,0.435	0.503,1.0,0.635	-0.397
1693	230775	Adgrb2	NC_000070.7	+	129899182	129899347	129900544	129900709	129898817	129898901	129901354	129901519	1693	0,1,0	1,0,3	1,2,2	1,0,0	314	314	1.83828e-06	1.90887e-05	0.0,1.0,0.0	0.5,1.0,1.0	-0.5
879	330814	Adgrl1	NC_000074.7	+	84650834	84650984	84655296	84655524	84649627	84649737	84656092	84656893	879	4,3,0	2,10,8	6,4,6	11,8,2	299	377	1.83493e-06	1.90887e-05	0.716,0.274,0.0	0.407,0.387,0.791	-0.198
4049	214048	Larp1b	NC_000069.7	+	40921799	40921940	40924325	40924469	40918402	40918577	40924885	40925051	4049	21160108	100109100	190168195	175136169	290	293	1.88709e-06	1.95395e-05	0.175,0.597,0.522	0.523,0.555,0.538	-0.107
103	230594	Tut4	NC_000070.7	+	108336069	108336938	108343650	108343814	108317204	108317397	108348544	108348661	103	294436456	149,74,84	286305282	65,50,48	1018	313	2.22203e-06	2.29419e-05	0.378,0.644,0.625	0.575,0.652,0.644	-0.075
4203	26398	Map2k4	NC_000077.7	-	65610309	65610429	65626017	65626192	65603003	65603123	65647094	65647197	4203	70120126	173,71,49	135149130	77,82,64	324	269	2.22967e-06	2.29554e-05	0.251,0.584,0.681	0.593,0.601,0.628	-0.102
3587	246104	Rhbdl3	NC_000077.7	+	80193489	80193513	80210383	80210542	80191329	80192097	80214184	80214409	3587	0,2,1	24,11,20	3,2,3	20,23,33	173	308	2.28137e-06	2.34212e-05	0.0,0.245,0.082	0.211,0.134,0.139	-0.052
4349	14011	Etv6	NC_000072.7	+	134043269	134043428	134114247	134114380	134012662	134013101	134199827	134199992	4349	44,50,23	69,44,34	15,18,26	38,25,47	308	282	2.45543e-06	2.5137e-05	0.369,0.51,0.382	0.265,0.397,0.336	0.088
142	22428	Dctn6	NC_000074.7	-	34566072	34566255	34572139	34572252	34564342	34564448	34573495	34573560	142	3,1,4	13,1,5	7,1,4	2,1,1	262	332	2.49084e-06	2.54276e-05	0.226,0.559,0.503	0.816,0.559,0.835	-0.307
2763	207304	Hectd1	NC_000078.7	-	51823278	51823413	51829264	51829370	51821433	51821573	51830964	51831059	2763	223124135	74168176	91114126	139149183	255	284	2.79028e-06	2.84044e-05	0.77,0.451,0.461	0.422,0.46,0.434	0.122
1434	77613	Prss36	NC_000073.7	-	127532738	127533004	127533310	127533452	127532542	127532664	127533561	127533799	1434	21,6,15	34,27,28	4,3,2	34,21,22	291	415	3.07078e-06	3.11723e-05	0.468,0.241,0.433	0.144,0.169,0.115	0.238
812	76775	Slc10a7	NC_000074.7	+	79425148	79425200	79433503	79433577	79423794	79423960	79456246	79456392	812	4,3,3	3,9,4	1,3,0	7,2,1	201	223	3.1845e-06	3.22364e-05	0.597,0.27,0.454	0.137,0.625,0.0	0.186
3904	67455	Klhl13	NC_000086.8	-	23160453	23160519	23181368	23181440	23127673	23127812	23225889	23225918	3904	26,10,4	5,2,2	5,6,12	3,5,3	221	215	3.26813e-06	3.29909e-05	0.835,0.829,0.661	0.619,0.539,0.796	0.124
1591	26611	Rcn2	NC_000075.7	+	55949858	55949964	55952415	55952612	55949128	55949488	55960190	55960304	1591	142,80,67	70143156	68,94,91	149158168	255	346	3.30423e-06	3.32626e-05	0.734,0.432,0.368	0.382,0.447,0.424	0.094
1677	381598	2610005L07Rik	NC_000074.7	+	20039783	20039903	20041811	20042184	20035860	20036159	20052877	20055498	1677	8,8,4	13,7,5	15,20,2	3,0,4	269	522	3.70612e-06	3.72049e-05	0.544,0.689,0.608	0.907,1.0,0.492	-0.186
2747	56398	Chp1	NC_000068.8	+	119397130	119397211	119402248	119402376	119391211	119391284	119411175	119411237	2747	63111108	306132118	143121169	182141207	230	277	4.04967e-06	4.05414e-05	0.199,0.503,0.524	0.486,0.508,0.496	-0.088
371	16195	Il6st	NC_000079.7	+	112609120	112609207	112611564	112611643	112600603	112600784	112616518	112616824	371	106,117,86	183,71,62	131121163	97,79,99	236	228	4.08637e-06	4.07962e-05	0.359,0.614,0.573	0.566,0.597,0.614	-0.077
2519	117198	Ivns1abp	NC_000067.7	+	151225126	151225354	151226731	151226860	151220248	151220506	151227304	151227474	2519	401943823874	388520701859	386335994488	165717342078	377	278	4.26652e-06	4.24776e-05	0.433,0.61,0.606	0.632,0.605,0.614	-0.067
2553	208194	Exog	NC_000075.7	+	119274352	119274387	119274753	119274867	119274025	119274216	119276014	119276164	2553	2,0,0	2,2,3	0,0,3	0,0,0	184	263	5.52423e-06	5.48488e-05	0.588,0.0,0.0	NA,NA,1.0	-0.804
433	230451	Junos	NC_000070.7	+	95047271	95047416	95048676	95048793	95041716	95041872	95049427	95049692	433	0,0,2	0,1,0	0,0,0	0,0,4	294	266	5.56739e-06	5.51263e-05	NA,0.0,1.0	NA,NA,0.0	0.5
443	230451	Junos	NC_000070.7	+	95047271	95047404	95048676	95048793	95041716	95041872	95049427	95049692	443	0,0,2	0,1,0	0,0,0	0,0,4	282	266	5.81033e-06	5.73751e-05	NA,0.0,1.0	NA,NA,0.0	0.5
1174	13822	Epb41l2	NC_000076.7	+	25377721	25378285	25380034	25380157	25364848	25364991	25382072	25382171	1174	65217237	103,49,43	201199250	63,54,66	713	272	5.96071e-06	5.87001e-05	0.194,0.628,0.678	0.549,0.584,0.591	-0.075
17	30930	Vps26a	NC_000076.7	-	62306838	62306914	62316336	62316486	62305679	62305836	62322436	62322584	17	54136138	222121116	131123148	79,98,88	299	225	6.50442e-06	6.38809e-05	0.155,0.458,0.472	0.555,0.486,0.559	-0.172
1027	241066	Carf	NC_000067.7	+	60175422	60175543	60178358	60178502	60171002	60171192	60180493	60180727	1027	23,9,14	11,11,13	8,6,6	9,13,8	270	293	6.58075e-06	6.44558e-05	0.694,0.47,0.539	0.491,0.334,0.449	0.143
883	330814	Adgrl1	NC_000074.7	+	84652890	84652905	84654926	84655011	84649627	84649737	84656092	84656893	883	0,0,0	0,2,0	0,8,4	0,0,1	164	234	7.37982e-06	7.20875e-05	NA,0.0,NA	NA,1.0,0.851	-0.925
3060	67492	Zfand4	NC_000072.7	+	116251776	116251986	116262814	116262882	116250533	116250833	116264942	116265129	3060	17,8,14	8,6,4	9,6,7	2,3,1	359	217	7.41603e-06	7.22465e-05	0.562,0.446,0.679	0.731,0.547,0.809	-0.133
1238	67216	Mboat2	NC_000078.7	+	24974197	24974293	24984565	24984621	24932715	24932793	24989292	24989347	1238	11,12,7	2,5,2	20,10,9	9,7,4	245	205	8.23457e-06	8.00056e-05	0.821,0.668,0.745	0.65,0.544,0.653	0.129
945	277414	Trp53i11	NC_000068.8	+	93019433	93019568	93026864	93027042	93017693	93018092	93027241	93027323	945	28,9,5	1,0,4	2,3,13	5,1,6	284	327	8.50136e-06	8.23768e-05	0.97,1.0,0.59	0.315,0.775,0.714	0.252
3617	353211	Prune2	NC_000085.7	+	17189655	17189694	17193689	17193737	17189041	17189077	17198147	17201322	3617	32,63,43	19,13,20	78,58,77	51,28,59	188	197	8.84004e-06	8.54301e-05	0.638,0.835,0.693	0.616,0.685,0.578	0.096
1664	235682	Zfp445	NC_000075.7	-	122685763	122685890	122686131	122686226	122683771	122683882	122686534	122686703	1664	45,29,25	48,61,39	26,29,36	56,92,80	244	276	9.15502e-06	8.82388e-05	0.515,0.35,0.42	0.344,0.263,0.337	0.114
839	271813	Agbl2	NC_000068.8	+	90614329	90614469	90620122	90620176	90613904	90614017	90621803	90621989	839	0,0,0	3,1,0	2,0,1	0,0,0	289	203	9.23226e-06	8.87472e-05	0.0,0.0,NA	1.0,NA,1.0	-1
1103	74199	Vit	NC_000083.7	+	78842043	78842113	78853807	78853873	78815491	78815754	78873443	78873600	1103	2,0,2	5,1,5	2,0,5	3,4,3	219	215	9.3975e-06	9.00966e-05	0.282,0.0,0.282	0.396,0.0,0.621	-0.151
3080	380698	Obscn	NC_000077.7	-	59020395	59020671	59022372	59022654	59018888	59019164	59023286	59023553	3080	105111401118	44013281109	8377781025	119110491169	431	425	1.02562e-05	9.80703e-05	0.702,0.458,0.499	0.409,0.422,0.464	0.121
876	330814	Adgrl1	NC_000074.7	+	84650834	84650984	84652890	84652905	84649627	84649737	84656092	84656893	876	4,3,0	0,0,0	6,4,6	0,8,4	299	164	1.11557e-05	0.00010639	1.0,1.0,NA	1.0,0.215,0.451	0.445
3023	12091	Glb1	NC_000075.7	+	114249420	114249571	114250756	114250817	114246028	114246198	114253012	114253107	3023	57,38,32	14,4,6	50,30,37	17,14,12	300	210	1.12916e-05	0.000107404	0.74,0.869,0.789	0.673,0.6,0.683	0.147
3732	67706	Tmem179b	NC_000085.7	-	8750653	8750788	8750868	8751056	8750391	8750470	8751698	8751831	3732	7,13,20	32,21,24	35,31,27	24,23,19	337	284	1.17985e-05	0.000111931	0.156,0.343,0.413	0.551,0.532,0.545	-0.239
847	75547	Akap13	NC_000073.7	+	75329567	75329621	75333141	75333207	75326853	75327227	75334864	75335057	847	48,62,21	42,20,19	26,37,36	32,23,35	203	215	1.1852e-05	0.000112145	0.548,0.767,0.539	0.463,0.63,0.521	0.08
3655	12288	Cacna1c	NC_000072.7	-	118607185	118607392	118615387	118615471	118604402	118604531	118628908	118629019	3655	68,30,25	18,40,26	24,25,31	14,9,13	233	356	1.24604e-05	0.000117595	0.852,0.534,0.595	0.724,0.809,0.785	-0.112
1977	52589	Ncald	NC_000081.7	-	37448471	37448523	37509119	37509238	37397300	37397697	37563634	37563708	1977	0,0,3	0,0,0	0,0,0	1,2,2	268	201	1.27303e-05	0.00011983	NA,NA,1.0	0.0,0.0,0.0	1
1442	67869	Paip2	NC_000084.7	+	35733097	35733170	35741790	35741872	35731669	35731812	35743923	35744087	1442	0,0,3	1,4,6	0,0,6	2,0,5	222	231	1.29409e-05	0.000121497	0.0,0.0,0.342	0.0,NA,0.555	-0.164
3983	73652	2210408F21Rik	NC_000072.7	+	31254782	31254890	31305223	31305295	31221039	31221293	31312925	31312997	3983	16,8,13	22,27,20	15,13,21	14,21,24	257	221	1.36734e-05	0.000128042	0.385,0.203,0.359	0.48,0.347,0.429	-0.103
4268	22004	Tpm2	NC_000070.7	-	43518643	43518719	43519002	43519078	43518401	43518464	43519226	43519297	4268	61115121	37,29,19	110,98,84	8,5,8	225	225	1.39583e-05	0.000130374	0.622,0.799,0.864	0.932,0.951,0.913	-0.17
521	194401	Mical3	NC_000072.7	-	120943014	120943077	120948711	120948801	120939715	120939826	120950363	120950608	521	51,45,57	63,52,50	44,41,52	36,37,31	239	212	1.46823e-05	0.000136783	0.418,0.434,0.503	0.52,0.496,0.598	-0.086
419	11429	Aco2	NC_000081.7	+	81779370	81779629	81783329	81783422	81773498	81773635	81787676	81787835	419	406871427005	328920211897	878481868915	219521022479	408	242	1.64604e-05	0.000152955	0.423,0.677,0.687	0.704,0.698,0.681	-0.099
2971	435766	Tnni3k	NC_000069.7	-	154533117	154533287	154539282	154539342	154498409	154498489	154562157	154562267	2971	56103108	146184176	89,91,131	158129149	209	319	1.75465e-05	0.000162631	0.369,0.461,0.484	0.462,0.518,0.573	-0.08
797	18393	Orc2	NC_000067.7	-	58539399	58539543	58540481	58540585	58536534	58536624	58541000	58541049	797	34,17,23	18,18,22	19,19,17	29,19,22	253	293	1.76487e-05	0.000163161	0.686,0.522,0.548	0.431,0.537,0.472	0.105
1681	22289	Kdm6a	NC_000086.8	+	18113213	18113348	18113805	18113961	18112435	18112655	18114508	18114598	1681	37,31,16	5,8,14	37,24,20	7,3,2	284	305	1.78822e-05	0.000164899	0.888,0.806,0.551	0.85,0.896,0.915	-0.139
390	104871	Spata7	NC_000078.7	+	98600248	98600410	98600510	98600578	98598225	98598296	98603824	98603872	390	3,2,5	5,4,1	0,2,0	3,0,4	311	217	1.93704e-05	0.000178168	0.295,0.259,0.777	0.0,1.0,0.0	0.11
3141	74451	Pgs1	NC_000077.7	+	117905399	117905548	117910432	117910558	117896195	117896717	117914230	117914837	3141	32,16,7	26,20,38	16,29,35	20,33,30	298	275	1.96751e-05	0.000180513	0.532,0.425,0.145	0.425,0.448,0.518	-0.096
1309	21408	Zfp354a	NC_000077.7	+	50950612	50950868	50950898	50950981	50950070	50950229	50951686	50951813	1309	1,3,9	12,7,4	6,5,4	3,1,5	405	232	2.01743e-05	0.000184625	0.046,0.197,0.563	0.534,0.741,0.314	-0.261
3508	14057	Sfxn1	NC_000079.7	+	54251366	54251471	54258062	54258082	54250749	54250799	54258820	54258870	3508	2,0,0	0,2,0	0,0,0	2,0,0	254	169	2.08261e-05	0.000190111	1.0,0.0,NA	0.0,NA,NA	0.5
3850	22138	Ttn	NC_000068.8	-	76725003	76725246	76733406	76733970	76724485	76724767	76736597	76736876	3850	540036924458	599379402	123111051397	230211257	713	392	2.13339e-05	0.000194257	0.832,0.843,0.859	0.746,0.742,0.749	0.099
1738	71562	Afmid	NC_000077.7	+	117726491	117726633	117727233	117727338	117726328	117726407	117729318	117730734	1738	23,37,30	32,40,50	11,4,12	10,5,8	291	254	2.16912e-05	0.000197015	0.386,0.447,0.344	0.49,0.411,0.567	-0.097
3435	210356	Nckap5	NC_000067.7	-	125867899	125867974	125894799	125894886	125841374	125842758	125904662	125904799	3435	0,0,0	0,3,2	0,1,0	0,0,0	236	224	2.18099e-05	0.000197598	NA,0.0,0.0	NA,1.0,NA	-1
1130	71521	Pds5a	NC_000071.7	-	65787261	65787398	65789055	65789124	65785341	65785465	65791514	65791673	1130	65,26,11	53,45,44	22,24,42	52,52,84	218	286	2.21187e-05	0.000199865	0.617,0.431,0.247	0.357,0.377,0.396	0.055
1254	100504561	9230112J17Rik	NC_000075.7	-	60435598	60435713	60450478	60450543	60433665	60433778	60453008	60453165	1254	4,9,14	16,36,48	13,13,7	25,23,28	214	264	2.21705e-05	0.000199865	0.236,0.236,0.265	0.391,0.411,0.236	-0.1
3883	74149	Zfp946	NC_000083.7	+	22663148	22663272	22665777	22665874	22647461	22647546	22670077	22670133	3883	4,5,3	1,6,3	7,10,12	4,1,5	273	246	2.31544e-05	0.000208217	0.783,0.429,0.474	0.612,0.9,0.684	-0.17
3112	215690	Nav1	NC_000067.7	-	135586036	135586155	135587391	135587516	135534899	135535642	135615656	135616059	3112	5,3,6	2,4,10	2,2,1	1,0,0	274	268	2.3646e-05	0.000212112	0.71,0.423,0.37	0.662,1.0,1.0	-0.386
632	81500	Sil1	NC_000084.7	-	35625911	35626019	35626197	35626286	35571319	35571433	35631843	35632443	632	0,1,1	2,0,3	0,0,0	0,3,0	238	257	2.45751e-05	0.000219901	0.0,1.0,0.265	NA,0.0,NA	0.422
2748	214585	Spg11	NC_000068.8	-	121915375	121915521	121917343	121917450	121913880	121914042	121918613	121918817	2748	19,14,19	24,30,21	20,16,16	19,12,19	256	295	2.54784e-05	0.000227423	0.477,0.35,0.51	0.548,0.606,0.492	-0.103
1822	24099	Tnfsf13b	NC_000074.7	+	10064168	10064261	10071372	10071429	10057249	10057334	10081309	10081422	1822	7,4,0	0,0,0	0,0,0	1,0,0	242	206	2.5943e-05	0.000231001	1.0,1.0,NA	0.0,NA,NA	1
3293	11980	Atp8a1	NC_000071.7	-	67936302	67936376	67938330	67938404	67933471	67933541	67943968	67944009	3293	42,38,33	131139126	23,8,15	87,62,107	223	223	2.60991e-05	0.000231821	0.243,0.215,0.208	0.209,0.114,0.123	0.073
2462	76890	Memo1	NC_000083.7	-	74524021	74524098	74532426	74532569	74509255	74509360	74548899	74549011	2462	113,87,75	131,65,63	108,79,112	59,61,82	292	226	2.79392e-05	0.000247559	0.4,0.509,0.48	0.586,0.501,0.514	-0.071
3794	22138	Ttn	NC_000068.8	-	76657338	76657422	76673114	76673192	76649079	76649160	76673719	76673836	3794	0,0,2	6,0,72	1,0,0	0,0,0	227	233	2.8008e-05	0.000247563	0.0,NA,0.028	1.0,NA,NA	-0.986
1257	320091	Ano4	NC_000076.7	-	88903961	88904093	88920408	88920515	88870936	88871043	88924054	88924155	1257	3,3,2	11,16,2	1,1,2	11,14,5	256	281	3.0262e-05	0.000266737	0.23,0.171,0.523	0.091,0.073,0.305	0.152
3510	381236	Lipo3	NC_000085.7	-	33536911	33537055	33556761	33556898	33535664	33535736	33557864	33557974	3510	13,4,5	39,6,23	6,12,10	13,10,30	286	293	3.03244e-05	0.000266737	0.255,0.406,0.182	0.321,0.551,0.255	-0.095
2534	231600	Chfr	NC_000071.7	+	110284348	110284518	110287982	110288055	110283916	110284060	110288219	110288319	2534	2,0,1	0,1,0	4,0,1	2,0,4	319	222	3.10036e-05	0.000272051	1.0,0.0,1.0	0.582,NA,0.148	0.302
1026	241066	Carf	NC_000067.7	+	60178358	60178502	60183152	60183315	60175422	60175543	60185267	60185331	1026	8,9,16	8,13,12	9,1,7	12,14,10	293	312	3.13479e-05	0.000274408	0.516,0.424,0.587	0.444,0.071,0.427	0.195
3828	22138	Ttn	NC_000068.8	-	76670576	76670657	76674548	76674623	76662131	76662218	76677731	76677815	3828	2,9,16	1,14,0	0,0,3	0,4,0	224	230	3.19469e-05	0.000278977	0.673,0.398,1.0	NA,0.0,1.0	0.19
447	230451	Junos	NC_000070.7	+	95041716	95041872	95048676	95048793	95035341	95035437	95049427	95049692	447	1,1,1	0,1,0	0,0,0	0,0,4	305	266	3.20764e-05	0.000279435	1.0,0.466,1.0	NA,NA,0.0	0.822
3329	240753	Plekha6	NC_000067.7	+	133203549	133203603	133208076	133208145	133202530	133202617	133209520	133209601	3329	17,19,10	3,6,8	35,47,59	14,7,5	203	218	3.3818e-05	0.0002939	0.859,0.773,0.573	0.729,0.878,0.927	-0.11
1571	320940	Atp11c	NC_000086.8	-	59274507	59274612	59275282	59275373	59268642	59271153	59281916	59282070	1571	4,5,0	27,18,15	7,0,4	7,3,4	240	254	3.43106e-05	0.000297468	0.136,0.227,0.0	0.514,0.0,0.514	-0.222
2352	85305	Kars	NC_000074.7	-	112735113	112735171	112736853	112736912	112734838	112735018	112737841	112737986	2352	0,0,0	0,4,0	0,1,0	0,0,0	208	207	3.90636e-05	0.000337867	NA,0.0,NA	NA,1.0,NA	-1
651	21985	Tpd52	NC_000069.7	-	9000051	9000100	9009670	9009772	8994493	8996234	9012540	9012689	651	36,37,47	9,27,15	37,29,40	8,11,10	251	198	4.03671e-05	0.000347483	0.759,0.519,0.712	0.785,0.675,0.759	-0.076
747	17260	Mef2c	NC_000079.7	+	83773383	83773527	83773588	83773726	83740896	83741100	83781173	83781360	747	164242230	5,22,17	171113194	32,41,25	293	287	4.03391e-05	0.000347483	0.97,0.915,0.93	0.84,0.73,0.884	0.12
952	70144	Lrch3	NC_000082.7	+	32806345	32806397	32807108	32807258	32802197	32802274	32808800	32808851	952	39,26,12	10,25,28	27,24,29	35,29,34	201	299	4.32708e-05	0.000371595	0.853,0.607,0.389	0.534,0.552,0.559	0.068
1540	442804	Kirrel3os	NC_000075.7	-	34839486	34839615	34847808	34847931	34834155	34834309	34851308	34851396	1540	3,1,0	0,0,1	0,0,2	0,0,0	272	278	4.35055e-05	0.000371849	1.0,1.0,0.0	NA,NA,1.0	-0.333
782	20452	St8sia4	NC_000067.7	-	95554972	95555525	95581237	95581495	95515406	95519689	95588588	95588720	782	82,28,48	49,34,32	37,20,36	51,22,56	407	702	4.34474e-05	0.000371849	0.743,0.587,0.721	0.556,0.611,0.526	0.119
4447	17207	Mcf2l	NC_000074.7	+	13063914	13063998	13064818	13064893	13063534	13063650	13067346	13067468	4447	2,1,0	0,0,1	0,0,0	1,0,0	233	224	4.47714e-05	0.000381769	1.0,1.0,0.0	0.0,NA,NA	0.667
3307	67582	Slc25a26	NC_000072.7	+	94526079	94526176	94541602	94541686	94512701	94512749	94553314	94553359	3307	2,0,0	0,1,1	0,0,0	1,0,0	246	233	4.50664e-05	0.000383382	1.0,0.0,0.0	0.0,NA,NA	0.333
3311	238988	Erc2	NC_000080.7	+	27345639	27345706	27350368	27350422	27344335	27344571	27374643	27375440	3311	0,2,2	1,0,0	2,0,0	0,0,0	216	203	4.52182e-05	0.000383772	0.0,1.0,1.0	1.0,NA,NA	-0.333
2448	56317	Anapc7	NC_000071.7	+	122567548	122567668	122570803	122570915	122566193	122566380	122571446	122571600	2448	130,67,78	117,63,47	53,40,35	64,27,65	269	261	4.73986e-05	0.000401338	0.519,0.508,0.617	0.446,0.59,0.343	0.088
4324	72993	Appl1	NC_000080.7	-	26682907	26682995	26684762	26684834	26681381	26681423	26685603	26685663	4324	25,27,25	29,22,29	52,36,44	25,31,29	221	237	4.83177e-05	0.000408166	0.48,0.568,0.48	0.69,0.555,0.619	-0.112
1483	56736	Rnf14	NC_000084.7	+	38440917	38441448	38442537	38442766	38433481	38433643	38446264	38446437	1483	504373397	110196180	393355470	195183239	680	378	4.97097e-05	0.000416046	0.718,0.514,0.551	0.528,0.519,0.522	0.071
869	330814	Adgrl1	NC_000074.7	+	84652887	84652905	84654926	84655011	84650834	84650984	84656092	84656893	869	0,0,0	0,2,0	0,1,0	0,0,0	167	234	4.9507e-05	0.000416046	NA,0.0,NA	NA,1.0,NA	-1
871	330814	Adgrl1	NC_000074.7	+	84652887	84652905	84654926	84655011	84649627	84649737	84656092	84656893	871	0,0,0	0,2,0	0,1,0	0,0,1	167	234	4.9507e-05	0.000416046	NA,0.0,NA	NA,1.0,0.0	-0.5
886	330814	Adgrl1	NC_000074.7	+	84652890	84652905	84654926	84655011	84650834	84650984	84656092	84656893	886	0,0,0	0,2,0	0,1,0	0,0,0	164	234	4.97079e-05	0.000416046	NA,0.0,NA	NA,1.0,NA	-1
4050	214048	Larp1b	NC_000069.7	+	40916042	40916101	40916603	40916663	40905212	40905385	40918402	40918577	4050	3,19,19	6,28,48	48,25,43	61,32,51	208	209	5.09046e-05	0.000425065	0.334,0.405,0.285	0.442,0.44,0.459	-0.106
661	67299	Dock7	NC_000070.7	-	98880605	98880695	98881883	98881973	98879600	98879696	98889269	98889439	661	6,14,12	22,16,14	3,4,0	9,18,24	239	239	5.33685e-05	0.000444615	0.214,0.467,0.462	0.25,0.182,0.0	0.237
4312	218461	Pde8b	NC_000079.7	-	95189395	95189438	95223235	95223376	95186433	95186511	95226785	95226864	4312	0,0,5	3,0,7	0,2,2	4,2,5	290	192	5.39946e-05	0.000448799	0.0,NA,0.321	0.0,0.398,0.209	-0.042
4165	225160	Thoc1	NC_000084.7	+	9959254	9959315	9960485	9960552	9959097	9959171	9962372	9962491	4165	11,16,18	17,11,4	11,12,10	11,11,23	210	216	5.46491e-05	0.0004532	0.4,0.599,0.822	0.507,0.529,0.309	0.159
4459	100855	Tbc1d14	NC_000071.7	-	36665703	36665775	36669797	36669892	36664921	36665050	36671382	36671463	4459	14,21,15	8,3,9	45,15,17	2,2,2	244	221	5.60461e-05	0.000463724	0.613,0.864,0.602	0.953,0.872,0.885	-0.21
2817	105428	Fam149b	NC_000080.7	+	20408091	20408208	20417913	20418020	20402771	20402907	20424397	20424522	2817	0,0,0	0,0,11	0,0,4	5,0,1	266	256	5.7114e-05	0.000471483	NA,NA,0.0	0.0,NA,0.794	-0.397
423	67988	Tmx3	NC_000084.7	+	90537228	90537274	90539080	90539161	90535517	90535641	90541653	90541753	423	41,15,20	86,26,30	18,21,30	27,25,36	195	230	6.34469e-05	0.000522572	0.36,0.405,0.44	0.44,0.498,0.496	-0.076
2732	381218	4430402I18Rik	NC_000085.7	-	28926018	28926143	28931489	28931531	28923150	28923231	28937079	28937128	2732	7,6,3	42,27,40	3,2,1	34,28,33	191	274	6.36912e-05	0.000523394	0.193,0.242,0.097	0.112,0.093,0.042	0.095
303	16169	Il15ra	NC_000068.8	+	11724823	11724916	11728223	11728421	11723074	11723153	11728906	11728939	303	0,1,5	34,43,40	4,2,8	52,20,50	242	347	6.56737e-05	0.000538465	0.0,0.032,0.152	0.099,0.125,0.187	-0.076
818	52855	Lair1	NC_000073.7	-	4013728	4013845	4031705	4032035	4013588	4013631	4058916	4058952	818	9,4,3	0,1,1	5,2,11	15,0,2	479	266	7.15672e-05	0.000585461	1.0,0.69,0.625	0.156,1.0,0.753	0.135
3064	227743	Mapkap1	NC_000068.8	+	34309119	34309277	34322014	34322342	34296798	34296860	34325144	34325234	3064	4,12,21	122126148	1,0,13	140115146	307	477	7.23818e-05	0.000590792	0.048,0.129,0.181	0.011,0.0,0.122	0.075
3192	12750	Clk4	NC_000077.7	+	51159595	51159673	51161363	51161422	51158991	51159058	51162626	51162849	3192	7,15,11	2,4,4	6,9,6	4,10,4	227	208	7.32665e-05	0.00059667	0.762,0.775,0.716	0.579,0.452,0.579	0.214
3265	58799	Crbn	NC_000072.7	-	106767792	106767952	106771148	106771298	106761377	106761440	106771955	106772158	3265	54119118	128,75,74	104,82,147	50,58,79	299	309	7.41536e-05	0.000602539	0.304,0.621,0.622	0.682,0.594,0.658	-0.129
4004	19258	Ptpn4	NC_000067.7	-	119692760	119692881	119711211	119711319	119671081	119671169	119730052	119730207	4004	44,35,41	34,58,57	41,32,42	39,25,37	257	270	7.48282e-05	0.000606661	0.576,0.388,0.43	0.525,0.574,0.544	-0.083
2807	234740	Tmem231	NC_000074.7	-	112653477	112653557	112654180	112654431	112645459	112645588	112659991	112660161	2807	0,0,1	1,0,1	1,0,0	0,0,0	400	229	7.90188e-05	0.000639206	0.0,NA,0.364	1.0,NA,NA	-0.818
1998	67128	Ube2g1	NC_000077.7	+	72553896	72553999	72563785	72563883	72498086	72498461	72568530	72568709	1998	122178185	179,130,92	164152210	93,95,132	252	247	8.0651e-05	0.000650956	0.4,0.573,0.663	0.633,0.611,0.609	-0.072
1601	102640405	Gm36470	NC_000071.7	-	3364586	3364784	3380206	3380284	3339979	3340455	3391497	3392252	1601	0,0,0	0,1,0	0,1,1	0,0,0	227	347	8.15778e-05	0.000656973	NA,0.0,NA	NA,1.0,1.0	-1
1104	216829	Mmgt2	NC_000077.7	+	62540272	62540374	62550989	62551195	62539457	62539682	62555495	62557182	1104	0,0,0	1,0,0	1,0,0	0,0,0	251	355	8.27861e-05	0.00066497	0.0,NA,NA	1.0,NA,NA	-1
840	271813	Agbl2	NC_000068.8	+	90619276	90619411	90620122	90620176	90613919	90614017	90621803	90621989	840	0,0,0	3,1,0	0,1,0	0,0,0	284	203	8.29377e-05	0.00066497	0.0,0.0,NA	NA,1.0,NA	-1
775	216292	Mettl25	NC_000076.7	-	105668965	105669141	105671987	105672081	105668711	105668876	105676936	105677241	775	2,0,0	2,0,1	0,0,1	0,2,0	243	325	8.35162e-05	0.00066813	0.572,NA,0.0	NA,0.0,1.0	-0.214
446	230451	Junos	NC_000070.7	+	95041716	95041872	95047271	95047404	95035341	95035437	95048676	95048793	446	1,0,1	0,1,0	0,0,0	0,0,1	305	282	8.51537e-05	0.000678235	1.0,0.0,1.0	NA,NA,0.0	0.667
448	230451	Junos	NC_000070.7	+	95041716	95041872	95047271	95047404	95038356	95038512	95048676	95048793	448	0,0,1	0,1,0	0,0,0	0,0,1	305	282	8.51537e-05	0.000678235	NA,0.0,1.0	NA,NA,0.0	0.5
1817	320560	Dennd5b	NC_000072.7	-	148956397	148956585	148969547	148970214	148945980	148946517	148982303	148982413	1817	265185168	75,34,48	158185234	30,30,44	816	337	8.89481e-05	0.000706903	0.593,0.692,0.591	0.685,0.718,0.687	-0.071
2629	70967	Eva1c	NC_000082.7	+	90663142	90663339	90666453	90666577	90627746	90628320	90672926	90673079	2629	1,0,12	4,5,3	0,2,3	1,2,0	346	273	9.93691e-05	0.000787995	0.165,0.0,0.759	0.0,0.441,1.0	-0.172
3754	378431	Txlnb	NC_000076.7	+	17690976	17691147	17703539	17703734	17682512	17682604	17705983	17706103	3754	45023232070	192732212932	163517021896	258724492766	320	344	0.000101976	0.0008069	0.201,0.437,0.431	0.405,0.428,0.424	-0.063
541	234353	Psd3	NC_000074.7	-	68615217	68615264	68658200	68658255	68573399	68574280	68664576	68664740	541	0,3,0	0,2,1	9,7,4	1,0,4	204	196	0.000109636	0.000865621	NA,0.59,0.0	0.896,1.0,0.49	-0.5
1707	214897	Csnk1g1	NC_000075.7	+	65927083	65927194	65939520	65939627	65920028	65920136	65946858	65952297	1707	17,10,11	8,8,7	9,9,5	8,13,10	260	256	0.000111742	0.000880335	0.677,0.552,0.607	0.526,0.405,0.33	0.192
2945	72635	Lins1	NC_000073.7	+	66358386	66358476	66359041	66359183	66357787	66358301	66359906	66360494	2945	8,6,1	0,3,2	1,2,6	3,2,3	239	291	0.00012517	0.00098398	1.0,0.709,0.378	0.289,0.549,0.709	0.18
620	223601	Cyrib	NC_000081.7	-	63842778	63842817	63894418	63894469	63829433	63829516	63932043	63932387	620	7,10,9	0,0,0	7,7,8	2,1,8	200	188	0.000129904	0.00101899	1.0,1.0,1.0	0.767,0.868,0.485	0.293
1013	108121	U2af1	NC_000083.7	-	31870619	31870686	31871475	31871542	31867818	31867868	31873952	31874040	1013	11,3,8	137148103	13,25,32	131114157	216	216	0.000134542	0.00105309	0.074,0.02,0.072	0.09,0.18,0.169	-0.091
2191	17765	Mtf2	NC_000071.7	+	108217027	108217229	108221172	108221320	108213538	108213831	108228690	108228889	2191	20,18,46	6,0,6	10,10,19	13,3,3	351	297	0.000136754	0.00106809	0.738,1.0,0.866	0.394,0.738,0.843	0.21
2158	68259	Ift80	NC_000069.7	-	68835059	68835124	68838154	68838318	68825822	68825958	68843179	68843254	2158	4,4,17	6,5,3	12,4,14	2,3,1	313	214	0.000142791	0.00111285	0.313,0.354,0.795	0.804,0.477,0.905	-0.241
4090	66129	Prxl2c	NC_000079.7	-	64456906	64456960	64460080	64460149	64456635	64456741	64460306	64460524	4090	85,68,60	91,78,81	96,62,85	61,51,68	218	203	0.000143862	0.00111639	0.465,0.448,0.408	0.594,0.531,0.538	-0.114
81	65973	Asph	NC_000070.7	-	9607796	9607871	9624359	9624401	9604515	9604629	9635900	9635969	81	65,127,93	102157139	129115128	142114134	191	224	0.000143632	0.00111639	0.428,0.487,0.44	0.516,0.542,0.528	-0.077
901	54123	Irf7	NC_000073.7	-	140844135	140844228	140844637	140844696	140843571	140843961	140844987	140845204	901	3,6,0	6,9,3	4,11,3	8,5,9	208	242	0.000144836	0.00112155	0.368,0.437,0.0	0.368,0.719,0.279	-0.187
3153	73744	Man2c1	NC_000075.7	+	57047153	57047248	57047482	57047587	57046894	57046992	57047665	57047822	3153	19,28,22	65,36,42	28,17,17	21,22,28	244	254	0.000148759	0.00114947	0.233,0.447,0.353	0.581,0.446,0.387	-0.127
2413	11490	Adam15	NC_000069.7	-	89248169	89248244	89248420	89248557	89247707	89247779	89248814	89248884	2413	0,2,6	2,6,3	3,1,7	12,12,21	286	224	0.000157747	0.00121633	0.0,0.207,0.61	0.164,0.061,0.207	0.128
1015	76478	Haus8	NC_000074.7	-	71708290	71708356	71708651	71708764	71708050	71708209	71709102	71709198	1015	24,42,44	14,15,8	26,18,32	11,10,18	262	215	0.000160955	0.00123779	0.585,0.697,0.819	0.66,0.596,0.593	0.084
2361	227333	Dgkd	NC_000067.7	+	87809580	87809661	87842821	87842926	87808089	87808200	87843213	87843346	2361	32,16,36	49,30,35	37,39,32	35,33,36	230	254	0.000161213	0.00123779	0.419,0.371,0.532	0.539,0.566,0.495	-0.093
3827	22138	Ttn	NC_000068.8	-	76670576	76670657	76672111	76672180	76662131	76662218	76680913	76680988	3827	0,0,12	0,4,0	2,1,4	0,0,2	218	230	0.000164313	0.00125893	NA,0.0,1.0	1.0,1.0,0.678	-0.393
151	20239	Atxn2	NC_000071.7	+	121923821	121923929	121924396	121924467	121923277	121923475	121933000	121933311	151	66,108,77	101,56,70	87,105,92	47,48,54	257	220	0.000164958	0.00126119	0.359,0.623,0.485	0.613,0.652,0.593	-0.13
155	271144	Ankdd1b	NC_000079.7	-	96561240	96561336	96566293	96566392	96557227	96557429	96569809	96569908	155	4,9,10	1,5,4	1,0,2	4,2,1	248	245	0.000177315	0.00135282	0.798,0.64,0.712	0.198,0.0,0.664	0.429
2963	105445	Dock9	NC_000080.7	-	121899922	121900005	121905821	121905911	121897844	121897914	121918758	121918875	2963	85,51,58	29,35,41	42,30,33	54,34,50	239	232	0.000177754	0.00135332	0.74,0.586,0.579	0.43,0.461,0.39	0.208
3629	76539	Fam204a	NC_000085.7	-	60208761	60208792	60209485	60209736	60208471	60208571	60215075	60215133	3629	29,55,82	3,7,5	56,52,41	9,11,13	400	180	0.000183939	0.00139748	0.813,0.78,0.881	0.737,0.68,0.587	0.157
354	109161	Ube2q2	NC_000075.7	+	55070251	55070353	55083474	55083531	55056601	55057110	55087756	55087897	354	71,39,34	39,32,29	30,39,45	38,43,42	251	206	0.000189896	0.00143971	0.599,0.5,0.49	0.393,0.427,0.468	0.1
3751	66396	Ccdc82	NC_000075.7	+	13252850	13253055	13262360	13262453	13246610	13246676	13266811	13266936	3751	26,17,25	40,16,21	8,11,8	23,17,16	354	242	0.000212291	0.00160614	0.308,0.421,0.449	0.192,0.307,0.255	0.141
2701	78286	Nav2	NC_000073.7	+	49202587	49202653	49203962	49204007	49201344	49201797	49206657	49206818	2701	15,44,59	19,34,42	34,24,17	31,32,23	215	194	0.000224413	0.00169432	0.416,0.539,0.559	0.497,0.404,0.4	0.071
1712	214897	Csnk1g1	NC_000075.7	+	65924043	65927194	65939520	65939627	65920028	65920136	65946858	65952297	1712	149139160	8,8,7	83,71,90	8,13,10	3300	256	0.000229012	0.00172545	0.591,0.574,0.639	0.446,0.298,0.411	0.216
738	12817	Col13a1	NC_000076.7	-	61725857	61725923	61726986	61727043	61723027	61723135	61728734	61728761	738	1,0,2	6,0,9	0,0,1	0,0,0	206	215	0.000246344	0.00185218	0.148,NA,0.188	NA,NA,1.0	-0.832
2802	19215	Ptgds	NC_000068.8	-	25358844	25358921	25358999	25359139	25358083	25358200	25359571	25359761	2802	71015592068	109412511701	171214531788	10258821321	289	226	0.000259564	0.00194753	0.337,0.494,0.487	0.566,0.563,0.514	-0.108
211	193813	Mcfd2	NC_000083.7	-	87566177	87566309	87571568	87571793	87565355	87565517	87573219	87573368	211	1,6,4	11,12,11	9,2,4	5,12,10	374	281	0.000263542	0.0019733	0.064,0.273,0.215	0.575,0.111,0.231	-0.122
3422	252972	Tpcn1	NC_000071.7	-	120680254	120680286	120680286	120680359	120679942	120680032	120680519	120680591	3422	1,2,0	1,0,0	0,0,0	2,1,1	222	181	0.000293631	0.00219406	0.449,1.0,NA	0.0,0.0,0.0	0.725
2824	14479	Usp15	NC_000076.7	-	122988945	122989032	122999497	122999559	122982698	122982843	123004131	123004277	2824	112118108	35,41,63	141146142	36,27,54	211	236	0.000304541	0.0022709	0.782,0.763,0.657	0.814,0.858,0.746	-0.072
4423	67607	Zfp788	NC_000073.7	+	41284103	41284134	41292756	41292856	41282954	41283118	41296906	41297041	4423	0,5,2	2,6,7	0,0,0	0,9,15	180	249	0.000319444	0.00237713	0.0,0.535,0.283	NA,0.0,0.0	0.273
3957	78586	Srbd1	NC_000083.7	-	86433538	86433677	86435143	86435261	86428077	86428174	86437541	86437708	3957	18,14,11	20,10,11	8,12,8	17,8,15	267	288	0.00032495	0.00241316	0.493,0.602,0.519	0.337,0.618,0.365	0.098
116	94186	Strn3	NC_000078.7	-	51691909	51692025	51694469	51694524	51689886	51689997	51694776	51694918	116	0,0,0	0,0,2	0,2,3	2,0,1	204	265	0.000336233	0.00249183	NA,NA,0.0	0.0,1.0,0.796	-0.599
2176	17354	Mllt10	NC_000068.8	+	18087321	18087536	18097594	18097645	18075935	18076015	18106268	18106323	2176	11,7,17	9,7,8	12,16,12	4,0,1	364	200	0.000339199	0.00250868	0.402,0.355,0.539	0.622,1.0,0.868	-0.398
1790	228714	Kat14	NC_000068.8	+	144222626	144222748	144231094	144231276	144217764	144217883	144235223	144235640	1790	31,19,36	46,45,43	22,16,31	58,45,84	271	331	0.000354464	0.00261624	0.451,0.34,0.506	0.317,0.303,0.311	0.122
1675	100041677	Zfp984	NC_000070.7	-	147868857	147868954	147880114	147880181	147845677	147845782	147891546	147891640	1675	3,10,9	4,1,0	0,2,1	2,1,0	216	246	0.000356058	0.00262267	0.461,0.919,1.0	0.0,0.695,1.0	0.228
1458	70549	Tln2	NC_000075.7	-	67401725	67401980	67446613	67446685	67367197	67367271	67466895	67466985	1458	0,0,0	7,3,2	3,0,1	1,1,1	221	404	0.00036203	0.00266125	0.0,0.0,0.0	0.846,0.0,0.646	-0.497
671	105722	Ano6	NC_000081.7	+	95728524	95728587	95792293	95792422	95688723	95688937	95810185	95810251	671	4,4,3	19,12,13	0,1,0	14,19,22	212	278	0.000425059	0.00311824	0.216,0.304,0.232	0.0,0.065,0.0	0.229
800	26992	Brd7	NC_000074.7	-	89063708	89063765	89066036	89066148	89060732	89060844	89069362	89069498	800	59,83,78	17,31,40	65,68,107	43,41,48	261	206	0.000438015	0.0032068	0.733,0.679,0.606	0.544,0.567,0.638	0.09
2908	320267	Fubp3	NC_000068.8	+	31504722	31504794	31505509	31505637	31503042	31503119	31506190	31507538	2908	8,24,13	11,10,18	10,8,18	19,21,17	221	277	0.000479815	0.00350575	0.477,0.751,0.475	0.397,0.323,0.57	0.138
2471	68043	Eef1akmt1	NC_000080.7	-	57795490	57795573	57803378	57803541	57787818	57788099	57808999	57809039	2471	4,45,37	43,54,50	42,47,58	64,53,69	312	232	0.000504133	0.00367601	0.065,0.383,0.355	0.328,0.397,0.385	-0.102
2704	66860	Tanc1	NC_000068.8	+	59529691	59529771	59555004	59555193	59477112	59477216	59588808	59588913	2704	38,43,56	181,89,96	41,35,35	57,53,79	229	338	0.000515963	0.00375472	0.237,0.416,0.463	0.515,0.494,0.395	-0.096
3663	12288	Cacna1c	NC_000072.7	-	118614696	118614774	118615387	118615471	118607359	118607392	118628908	118629019	3663	208,97,102	66,89,88	58,63,71	73,53,121	233	227	0.000539875	0.00392086	0.754,0.515,0.53	0.436,0.537,0.364	0.154
2795	67246	Resf1	NC_000072.7	+	149219132	149219206	149226229	149226298	149211819	149211875	149226902	149231282	2795	9,10,14	6,0,0	29,32,31	1,9,14	223	218	0.000543203	0.00392927	0.595,1.0,1.0	0.966,0.777,0.684	0.056
3823	22138	Ttn	NC_000068.8	-	76682400	76682481	76687146	76687248	76649079	76649160	76687498	76687573	3823	10,2,13	0,0,2	0,0,0	0,0,1	251	230	0.000542314	0.00392927	1.0,1.0,0.856	NA,NA,0.0	0.952
3944	83679	Pde4dip	NC_000069.7	-	97704047	97704124	97731530	97731641	97700800	97700924	97748949	97749101	3944	274207185	33411591050	137119148	10489891086	260	226	0.000544846	0.00393331	0.416,0.134,0.133	0.102,0.095,0.106	0.127
1365	213084	Cdkl3	NC_000077.7	+	51926773	51926847	51931387	51931447	51924340	51924438	51975200	51975317	1365	0,0,1	0,0,3	2,1,4	0,0,0	223	209	0.000555761	0.00399911	NA,NA,0.238	1.0,1.0,1.0	-0.762
242	353187	Nr1d2	NC_000080.7	+	4249639	4249728	4252901	4253046	4247442	4247709	4254202	4254822	242	129,80,87	458222168	123,92,131	202203306	238	294	0.000556168	0.00399911	0.258,0.308,0.39	0.429,0.359,0.346	-0.059
2246	94190	Ophn1	NC_000086.8	-	97807310	97807382	97824561	97824623	97775970	97776072	97846690	97846786	2246	11,14,12	4,12,4	5,13,15	3,2,4	211	221	0.000561028	0.00401811	0.742,0.55,0.759	0.636,0.872,0.797	-0.085
2429	241431	Xirp2	NC_000068.8	+	67338252	67347517	67349563	67349697	67337390	67337524	67355115	67356964	2429	289773448333331	923476464	485874537055883	723618768	9414	283	0.00055999	0.00401811	0.486,0.685,0.683	0.669,0.688,0.686	-0.063
4396	56381	Spen	NC_000070.7	-	141212869	141212983	141214876	141214990	141211035	141211136	141215303	141215429	4396	46,23,35	12,18,14	27,35,39	27,39,32	263	263	0.000564428	0.00403449	0.793,0.561,0.714	0.5,0.473,0.549	0.182
835	271813	Agbl2	NC_000068.8	+	90641600	90641708	90643618	90643696	90640984	90641107	90645683	90646577	835	0,0,0	0,0,1	1,1,4	2,4,2	257	227	0.000579862	0.00413665	NA,NA,0.0	0.306,0.181,0.639	-0.375
1502	16177	Il1r1	NC_000067.7	+	40310895	40311081	40315257	40315337	40305699	40306041	40321392	40321456	1502	11,0,5	0,8,10	0,3,0	3,0,3	335	229	0.000589984	0.00420059	1.0,0.0,0.255	0.0,1.0,0.0	0.085
3386	212285	Arap2	NC_000071.7	-	62863950	62864071	62872075	62872145	62855583	62855762	62887863	62888217	3386	22,18,13	21,28,35	14,5,4	21,13,18	219	270	0.000596404	0.00423798	0.564,0.442,0.314	0.451,0.322,0.215	0.111
3632	103583	Fbxw11	NC_000077.7	+	32630200	32630302	32658187	32658250	32592554	32592935	32661771	32661997	3632	8,8,9	80,49,50	0,1,0	12,58,26	251	212	0.000599723	0.00425322	0.078,0.121,0.132	0.0,0.014,0.0	0.106
4141	99712	Cept1	NC_000069.7	-	106420118	106420203	106427324	106427409	106413036	106413168	106438452	106438594	4141	28,11,11	49,30,20	14,4,5	19,31,34	234	234	0.000628515	0.0044487	0.364,0.268,0.355	0.424,0.114,0.128	0.107
3129	217835	Rin3	NC_000078.7	+	102317140	102317213	102324963	102325055	102292053	102292171	102334622	102336107	3129	2,10,9	32,14,19	5,10,14	13,11,26	222	241	0.000649012	0.00458483	0.064,0.437,0.34	0.295,0.497,0.369	-0.107
1781	108699	Chn1	NC_000068.8	-	73490023	73490101	73509958	73510247	73462089	73462174	73537262	73537376	1781	54,80,98	66,36,34	105,96,91	29,24,32	438	227	0.000652814	0.00460272	0.298,0.535,0.599	0.652,0.675,0.596	-0.164
2781	78611	Btbd19	NC_000070.7	-	116978167	116978293	116978394	116978526	116976408	116978058	116978610	116978679	2781	1,0,4	1,2,7	4,4,0	0,2,1	281	275	0.00066977	0.0047131	0.495,0.0,0.359	1.0,0.662,0.0	-0.269
3599	69008	Cab39l	NC_000080.7	+	59764204	59764264	59766290	59766356	59757014	59757183	59776510	59776654	3599	28,12,16	2,21,19	5,6,11	19,17,10	209	215	0.00068258	0.00479393	0.935,0.37,0.464	0.213,0.266,0.531	0.253
3242	66395	Ahnak	NC_000085.7	+	9022988	9023080	9044816	9044965	9014522	9014622	9053939	9054290	3242	2,10,2	32,7,14	3,1,9	7,0,7	241	298	0.000685849	0.00480758	0.072,0.639,0.15	0.346,1.0,0.614	-0.366
2083	54683	Prdx5	NC_000085.7	-	6884909	6885041	6885349	6885484	6884609	6884648	6886826	6887474	2083	32313011254	54711491094	162214421591	118011821441	284	281	0.00070505	0.00493263	0.369,0.528,0.531	0.576,0.547,0.522	-0.072
2064	22129	Ttc3	NC_000082.7	+	94209412	94209575	94209605	94209760	94204172	94204227	94210542	94210588	2064	82,94,79	18,10,18	64,28,66	4,3,5	312	304	0.000736535	0.00514297	0.816,0.902,0.81	0.94,0.901,0.928	-0.08
2921	320712	Abi3bp	NC_000082.7	+	56447041	56447110	56447922	56448036	56444865	56444925	56449458	56449518	2921	0,0,1	0,4,3	0,2,1	3,2,0	218	263	0.000741254	0.00516597	NA,0.0,0.287	0.0,0.547,1.0	-0.372
4266	244144	Usp35	NC_000073.7	-	96962705	96962799	96963940	96964134	96962262	96962369	96969173	96969332	4266	5,3,0	2,4,3	3,0,2	1,0,0	343	243	0.000752188	0.00523211	0.639,0.347,0.0	0.68,NA,1.0	-0.511
3567	17996	Neb	NC_000068.8	-	52047302	52047395	52047843	52047936	52043067	52043160	52049488	52049581	3567	1,9,12	3,7,2	1,5,3	0,4,4	242	242	0.000779491	0.00541164	0.25,0.563,0.857	1.0,0.556,0.429	-0.105
3115	110265	Msra	NC_000080.7	-	64522512	64522632	64551135	64551204	64471277	64471382	64678158	64678475	3115	24,58,43	56,48,49	73,64,62	52,31,51	218	269	0.000781703	0.00541662	0.346,0.599,0.52	0.634,0.718,0.6	-0.162
73	232341	Wnk1	NC_000072.7	-	119929645	119929930	119930731	119931193	119928858	119928956	119933031	119933157	73	285514495	161360356	743646794	711604697	611	434	0.000785119	0.00542991	0.557,0.504,0.497	0.426,0.432,0.447	0.084
315	192196	Luc7l2	NC_000072.7	+	38531914	38531998	38536138	38536239	38528268	38528843	38542589	38542657	315	29,59,58	22,32,18	57,39,42	17,6,8	233	250	0.000828733	0.00572062	0.586,0.664,0.776	0.782,0.875,0.849	-0.16
792	108086	Rnf216	NC_000071.7	-	143075874	143076513	143078749	143078880	143075497	143075574	143084133	143084255	792	56,50,57	250324259	62,58,71	226256221	280	788	0.000844802	0.00582046	0.387,0.303,0.382	0.436,0.389,0.475	-0.076
2161	70575	Gfod2	NC_000074.7	-	106449480	106449676	106453482	106453792	106440677	106444282	106454619	106454963	2161	2,3,3	4,0,1	1,0,2	0,3,10	459	345	0.000870903	0.0059889	0.273,1.0,0.693	1.0,0.0,0.131	0.278
1989	73062	Ppp1r16a	NC_000081.7	+	76577426	76577552	76577638	76577714	76577213	76577338	76577794	76577924	1989	54,27,37	6,25,19	39,26,28	17,22,18	275	225	0.000900806	0.0061828	0.88,0.469,0.614	0.652,0.492,0.56	0.086
3369	27660	1700088E04Rik	NC_000081.7	-	79020506	79020689	79023437	79023500	79019836	79019965	79025080	79025192	3369	3,13,5	1,2,0	0,0,0	0,1,0	212	332	0.000922581	0.00632029	0.825,0.911,1.0	NA,0.0,NA	0.912
2533	17772	Mtm1	NC_000086.8	+	70276677	70276750	70297856	70297967	70274996	70275067	70303330	70303432	2533	20,23,31	54,21,51	41,24,40	39,37,51	222	260	0.00092792	0.00634487	0.303,0.562,0.416	0.552,0.432,0.479	-0.061
1567	66407	Mrps15	NC_000070.7	+	125945117	125945202	125947292	125947351	125944272	125944321	125948753	125948945	1567	7,82,102	18125100	103101128	88,119,92	234	208	0.000932383	0.00636338	0.257,0.368,0.476	0.51,0.43,0.553	-0.131
2587	75607	Wnk2	NC_000079.7	-	49197849	49197894	49203959	49204058	49196103	49196342	49204832	49205003	2587	16,25,30	20,59,52	56,56,57	45,41,61	248	194	0.000955082	0.00650605	0.385,0.249,0.311	0.493,0.517,0.422	-0.162
1546	52397	Zfp644	NC_000071.7	-	106838595	106838743	106843508	106843565	106814650	106814711	106843663	106844084	1546	0,0,0	0,1,2	2,1,3	3,3,0	206	297	0.000980959	0.00666979	NA,0.0,0.0	0.49,0.325,1.0	-0.605
1217	78787	Usp54	NC_000080.7	-	20610913	20612310	20620315	20620483	20606314	20606433	20623835	20623969	1217	111,62,57	375387475	43,52,53	424315365	317	1546	0.00104152	0.00706829	0.591,0.439,0.369	0.331,0.446,0.415	0.069
3333	240753	Plekha6	NC_000067.7	+	133207110	133207191	133208076	133208145	133203549	133203603	133209520	133209601	3333	0,0,0	4,4,4	1,6,3	10,9,2	230	218	0.0010546	0.00714366	0.0,0.0,0.0	0.087,0.387,0.587	-0.354
2423	13405	Dmd	NC_000086.8	+	83469313	83469415	83475489	83475598	83416988	83417153	83517739	83517972	2423	123155162	234129149	172134175	126130163	251	258	0.00107506	0.0072687	0.351,0.553,0.528	0.584,0.514,0.525	-0.064
30	11629	Aif1	NC_000083.7	-	35390389	35390552	35390738	35390780	35389961	35390169	35391103	35391170	30	2,0,4	3,6,7	6,1,4	9,4,6	191	312	0.00108338	0.00731128	0.521,0.0,0.483	0.521,0.29,0.521	-0.109
3446	53416	Stk39	NC_000068.8	-	68139335	68139398	68144824	68144947	68137384	68137452	68189157	68189223	3446	179390379	131,84,105	209180174	38,39,46	272	212	0.00110256	0.00742689	0.516,0.783,0.738	0.811,0.782,0.747	-0.101
4066	26921	Map4k4	NC_000067.7	+	40039783	40039909	40042916	40043147	40036180	40036342	40043966	40044073	4066	14,28,40	243170167	43,51,46	145152209	275	380	0.00114499	0.00769843	0.074,0.185,0.249	0.291,0.317,0.233	-0.111
2866	15980	Ifngr2	NC_000082.7	+	91351835	91351968	91354772	91354966	91343946	91344120	91356864	91357013	2866	395359330	74371355	553485580	647559692	282	343	0.00121888	0.00818001	0.867,0.541,0.531	0.51,0.513,0.505	0.137
304	53332	Mtmr1	NC_000086.8	+	70421209	70421236	70422619	70422670	70420492	70420516	70426805	70426881	304	4,8,7	2,9,1	30,15,21	3,3,3	176	200	0.00124747	0.00835137	0.694,0.503,0.888	0.919,0.85,0.888	-0.191
4012	11789	Apc	NC_000084.7	+	34394057	34394210	34399110	34399275	34380746	34380787	34401350	34401432	4012	53,28,42	8,1,4	62,52,37	2,0,1	302	314	0.00124902	0.00835137	0.873,0.967,0.916	0.97,1.0,0.975	-0.063
3305	20892	Cenpx	NC_000077.7	-	120602669	120602721	120603265	120603538	120602528	120602582	120604355	120604512	3305	4,8,14	6,7,8	9,6,9	14,8,10	422	201	0.00130565	0.00871392	0.241,0.352,0.455	0.234,0.263,0.3	0.084
3025	83997	Slmap	NC_000080.7	-	26180564	26180615	26181058	26181109	26174692	26174755	26181196	26181365	3025	34,35,48	6,18,16	37,26,34	25,16,24	200	200	0.0013112	0.00873489	0.85,0.66,0.75	0.597,0.619,0.586	0.153
1017	13036	Ctsh	NC_000075.7	+	89942531	89942563	89943571	89943677	89936319	89936687	89944769	89944840	1017	6,16,18	74,61,48	8,17,25	50,53,50	181	255	0.00133317	0.00886497	0.103,0.27,0.346	0.184,0.311,0.413	-0.063
3173	219189	Vwa8	NC_000080.7	+	79171105	79171270	79172033	79172083	79162701	79162869	79172622	79172731	3173	372230297	260,68,87	475446522	125134142	314	199	0.0014214	0.00943437	0.476,0.682,0.684	0.707,0.678,0.7	-0.081
1785	108699	Chn1	NC_000068.8	-	73509958	73510247	73537262	73537376	73462089	73462174	73540798	73540830	1785	50,27,24	19,50,54	37,27,26	50,50,50	263	438	0.00142895	0.00946714	0.814,0.473,0.425	0.552,0.473,0.464	0.074
311	114601	Ehbp1l1	NC_000085.7	-	5767689	5770435	5770713	5770754	5767066	5767224	5770836	5770905	311	162135114	282257694648	133145172	631555837408	190	2895	0.00158172	0.0104602	0.467,0.263,0.272	0.243,0.284,0.261	0.071
3925	74182	Gpcpd1	NC_000068.8	-	132392233	132392474	132414104	132414177	132389476	132389639	132419987	132420157	3925	5,21,23	331227198	119104110	9228351025	222	390	0.00161426	0.0106559	0.026,0.14,0.169	0.185,0.18,0.159	-0.063
474	28185	Tomm70a	NC_000082.7	+	56968095	56968193	56970182	56970305	56966392	56966509	56972945	56974893	474	179,116,85	43127144	93,81,127	135114117	247	272	0.00162696	0.0107202	0.821,0.501,0.394	0.431,0.439,0.544	0.101
1475	56736	Rnf14	NC_000084.7	+	38430324	38430484	38430518	38430628	38429653	38429851	38432806	38432979	1475	4,5,2	1,0,1	5,2,6	2,3,3	309	259	0.00165679	0.0108969	0.77,1.0,0.626	0.677,0.358,0.626	0.245
2107	170707	Usp48	NC_000070.7	+	137333999	137334127	137335368	137335493	137333062	137333219	137336308	137336417	2107	27,29,36	50,28,37	40,49,35	25,34,31	277	274	0.00172571	0.0113297	0.348,0.506,0.49	0.613,0.588,0.528	-0.128
820	22404	Wiz	NC_000083.7	-	32597813	32598092	32600057	32600130	32595496	32597472	32606546	32606791	820	3,7,5	18,7,1	1,4,2	7,8,5	222	428	0.00181153	0.0118716	0.243,0.658,0.906	0.216,0.491,0.435	0.222
2631	110532	Adarb1	NC_000076.7	-	77190358	77190543	77192735	77192902	77161699	77161774	77195400	77195569	2631	1,1,1	1,1,0	1,0,0	1,1,1	316	334	0.00187814	0.0122859	0.514,0.514,1.0	0.514,0.0,0.0	0.505
4440	19286	Pts	NC_000075.7	-	50438169	50438249	50439445	50439532	50436022	50436079	50439856	50439956	4440	4,8,11	32,111,88	29,14,24	77,95,100	236	229	0.00188686	0.0123207	0.108,0.065,0.108	0.268,0.125,0.189	-0.1
[truncated: 79 more rows]

## Sheet: HypoTHvC_RI
HypoTH v/s Control_RI.TargetAndJunctionCounts
[truncated: 276 more rows]

## Sheet: HypoTHvC_SE_TargetAndJunction
HypoTH v/s Control_SE.TargetAndJunctionCounts
[truncated: 1,946 more rows]

## Sheet: T3vC_A3SS.TargetAndJunction
HypoTH+T3 v/s Control_A3SS.TargetAndJunctionCount
[truncated: 841 more rows]

## Sheet: T3vC_A5SS.TargetAndJunction
HypoTH+T3 v/s Control_A5SS.TargetAndJunctionCount
[truncated: 777 more rows]

[truncated: 23 more sheets: T3vC_RI_TargetAndJunction, T3vC_MXE_TargetAndJunction, T3vC_SE_TargetAndJunction, T3vP_A3SS.TargetAndJunction, T3vP_A5SS.TargetAndJunction, T3vP_MXE_TargetAndJunction, T3vP_RI_TargetAndJunction, T3vP_SE_TargetAndJunction, HyperTvC_A3SS.TargetAndJunction, HyperTvC_A5SS.TargetAndJunction, HyperTHvC_MXE_TargetAndJunction, HyperTHvC_RI_TargetAndJunction, HyperTHvC_SE_TargetAndJunction, T4vP_A3SS.TargetAndJunction, T4vP_A5SS.TargetAndJunction, T4vP_MXE_TargetAndJunction, T4vP_RI_TargetAndJunction, T4vP_SE_TargetAndJunction, T4vT3_A3SS.TargetAndJunction, T4vT3_A5SS.TargetAndJunction …]
