# Supplementary material for: Novel Transcriptomic Interactomes of Noncoding RNAs in the Heart under Altered Thyroid Hormonal States
Source: Int J Mol Sci. 2023 Mar 31;24(7):6560. doi: 10.3390/ijms24076560 (PMC10095585; doi:10.3390/ijms24076560)
Supplement: Supplementary file 1 [file ijms-24-06560-s001.zip › Supplemental File S5 Differentially Expressed circRNA Details_Alternative Backsplicing.xlsx]

## Sheet: DE_CircRNA_Details
Differentially Expressed CircRNA Details
ID	chr	start	end	strand	circType	geneName	isoformName	exonCount	index	exonSizes	exonOffsets	flankIntron
mmu_circ_4456	NC_000069.7	135361260	135375100	-	circRNA	18033	NM_008689.2	5	6,5,4,3,2	99,38,79,40,70	0,3528,7415,12253,13770	NC_000069.7:135332504-135361260|NC_000069.7:135375100-135396883
mmu_circ_5616	NC_000072.7	119897070	119897989	+	circRNA	19365	XM_036165958.1	2	10,11	81222	0,697	NC_000072.7:119896038-119897070|NC_000072.7:119897989-119899432
mmu_circ_2471	NC_000074.7	96091941	96093050	+	circRNA	17388	NM_008609.4	2	2,3	149129	0,980	NC_000074.7:96079646-96091941|NC_000074.7:96093050-96094555
mmu_circ_3252	NC_000068.8	92044393	92061069	+	circRNA	192285	XM_030248703.2	5	2,3,4,5,6	41,127,144,33,66	0,1400,7423,14400,16610	NC_000068.8:92014697-92044393|NC_000068.8:92061069-92150573
mmu_circ_3252	NC_000068.8	92044393	92061069	+	circRNA	192285	XM_006498967.4	5	2,3,4,5,6	41,112,144,33,66	0,1415,7423,14400,16610	NC_000068.8:92014697-92044393|NC_000068.8:92061069-92150573
mmu_circ_3252	NC_000068.8	92044393	92061069	+	circRNA	192285	XM_006498971.5	4	2,3,4,5	41,144,33,66	0,7423,14400,16610	NC_000068.8:92014697-92044393|NC_000068.8:92061069-92150573
mmu_circ_3252	NC_000068.8	92044393	92061069	+	circRNA	192285	XM_011239364.3	5	3,4,5,6,7	41,127,144,33,87	0,1400,7423,14400,16589	NC_000068.8:92017753-92044393|NC_000068.8:92061069-92150573
mmu_circ_3252	NC_000068.8	92044393	92061069	+	circRNA	192285	XM_017316533.3	5	2,3,4,5,6	41,112,144,33,87	0,1415,7423,14400,16589	NC_000068.8:92014697-92044393|NC_000068.8:92061069-92150573
mmu_circ_1539	NC_000068.8	76677731	76712183	-	circRNA	22138	XM_036160536.1	54	141,140,139,138,137,136,135,134,133,132,131,130,129,128,127,126,125,124,123,122,121,120,119,118,117,116,115,114,113,112,111,110,109,108,107,106,105,104,103,102,101,100,99,98,97,96,95,94,93,92,91,90,89,88	84,84,78,84,255,78,93,75,75,210,81,84,78,69,81,102,102,75,78,81,84,87,84,81,87,78,78,60,402,54,75,84,60,27,78,210,261,268,90,184,286,93,288,291,288,288,279,279,279,288,279,282,279,282	0,337,891,1171,1429,1869,2607,2918,3182,4167,4669,6217,6463,6762,6999,8877,9415,9767,10009,10222,10516,12072,12526,13709,14035,14724,14962,15412,15886,16884,17835,19770,20034,20495,20620,20899,22963,23322,23688,24317,25293,25679,26323,28303,29064,29494,30515,30880,31286,31670,32595,32987,33676,34170	NC_000068.8:76662218-76677731|NC_000068.8:76712183-76714253
mmu_circ_1539	NC_000068.8	76677731	76712183	-	circRNA	22138	NM_001385708.1	56	143,142,141,140,139,138,137,136,135,134,133,132,131,130,129,128,127,126,125,124,123,122,121,120,119,118,117,116,115,114,113,112,111,110,109,108,107,106,105,104,103,102,101,100,99,98,97,96,95,94,93,92,91,90,89,88	84,84,78,84,255,78,93,75,75,210,81,84,84,84,78,69,81,102,102,75,78,81,84,87,84,81,87,78,78,60,402,54,75,84,60,27,78,210,261,268,90,184,286,93,288,291,288,288,279,279,279,288,279,282,279,282	0,337,891,1171,1429,1869,2607,2918,3182,4167,4669,5446,5767,6217,6463,6762,6999,8877,9415,9767,10009,10222,10516,12072,12526,13709,14035,14724,14962,15412,15886,16884,17835,19770,20034,20495,20620,20899,22963,23322,23688,24317,25293,25679,26323,28303,29064,29494,30515,30880,31286,31670,32595,32987,33676,34170	NC_000068.8:76677540-76677731|NC_000068.8:76712183-76714253
mmu_circ_1539	NC_000068.8	76677731	76712183	-	circRNA	22138	XM_036160537.1	39	126,125,124,123,122,121,120,119,118,117,116,115,114,113,112,111,110,109,108,107,106,105,104,103,102,101,100,99,98,97,96,95,94,93,92,91,90,89,88	84,84,75,210,81,84,87,84,81,87,78,78,60,402,54,75,84,60,27,78,210,261,268,90,184,286,93,288,291,288,288,279,279,279,288,279,282,279,282	0,337,3182,4167,4669,10516,12072,12526,13709,14035,14724,14962,15412,15886,16884,17835,19770,20034,20495,20620,20899,22963,23322,23688,24317,25293,25679,26323,28303,29064,29494,30515,30880,31286,31670,32595,32987,33676,34170	NC_000068.8:76662218-76677731|NC_000068.8:76712183-76714253
mmu_circ_1539	NC_000068.8	76677731	76712183	-	circRNA	22138	XM_036160535.1	55	142,141,140,139,138,137,136,135,134,133,132,131,130,129,128,127,126,125,124,123,122,121,120,119,118,117,116,115,114,113,112,111,110,109,108,107,106,105,104,103,102,101,100,99,98,97,96,95,94,93,92,91,90,89,88	84,84,78,84,255,93,75,75,210,81,84,84,84,78,69,81,102,102,75,78,81,84,87,84,81,87,78,78,60,402,54,75,84,60,27,78,210,261,268,90,184,286,93,288,291,288,288,279,279,279,288,279,282,279,282	0,337,891,1171,1429,2607,2918,3182,4167,4669,5446,5767,6217,6463,6762,6999,8877,9415,9767,10009,10222,10516,12072,12526,13709,14035,14724,14962,15412,15886,16884,17835,19770,20034,20495,20620,20899,22963,23322,23688,24317,25293,25679,26323,28303,29064,29494,30515,30880,31286,31670,32595,32987,33676,34170	NC_000068.8:76662218-76677731|NC_000068.8:76712183-76714253
mmu_circ_1539	NC_000068.8	76677731	76712183	-	circRNA	22138	NM_011652.3	56	141,140,139,138,137,136,135,134,133,132,131,130,129,128,127,126,125,124,123,122,121,120,119,118,117,116,115,114,113,112,111,110,109,108,107,106,105,104,103,102,101,100,99,98,97,96,95,94,93,92,91,90,89,88,87,86	84,84,78,84,354,78,93,75,75,210,81,84,84,84,78,69,81,102,102,75,78,81,84,87,84,81,87,78,78,60,402,54,75,84,60,27,78,210,261,268,90,184,286,93,288,291,288,288,279,279,279,288,279,282,279,282	0,337,891,1171,1429,1869,2607,2918,3182,4167,4669,5446,5767,6217,6463,6762,6999,8877,9415,9767,10009,10222,10516,12072,12526,13709,14035,14724,14962,15412,15886,16884,17835,19770,20034,20495,20620,20899,22963,23322,23688,24317,25293,25679,26323,28303,29064,29494,30515,30880,31286,31670,32595,32987,33676,34170	NC_000068.8:76677540-76677731|NC_000068.8:76712183-76714253
mmu_circ_799	NC_000079.7	11695851	11702899	-	circRNA	20191	XM_006516610.2	4	62,61,60,59	122,65,116,124	0,3496,5977,6924	NC_000079.7:11691133-11695851|NC_000079.7:11702899-11705177
mmu_circ_2045	NC_000067.7	43180857	43192414	-	circRNA	14200	NM_010212.4	2	3,2	175179	0,11378	NC_000067.7:43170981-43180857|NC_000067.7:43192414-43202861
mmu_circ_1548	NC_000068.8	76688247	76712183	-	circRNA	22138	NM_001385708.1	34	121,120,119,118,117,116,115,114,113,112,111,110,109,108,107,106,105,104,103,102,101,100,99,98,97,96,95,94,93,92,91,90,89,88	84,87,84,81,87,78,78,60,402,54,75,84,60,27,78,210,261,268,90,184,286,93,288,291,288,288,279,279,279,288,279,282,279,282	0,1556,2010,3193,3519,4208,4446,4896,5370,6368,7319,9254,9518,9979,10104,10383,12447,12806,13172,13801,14777,15163,15807,17787,18548,18978,19999,20364,20770,21154,22079,22471,23160,23654	NC_000068.8:76688034-76688247|NC_000068.8:76712183-76714253
mmu_circ_2258	NC_000075.7	65701903	65702777	-	circRNA	214812	NM_172536.3	1	2	874	0	NC_000075.7:65638483-65701903|NC_000075.7:65702777-65734747
mmu_circ_960	NC_000078.7	51694776	51708496	-	circRNA	94186	NM_001172098.1	6	7,6,5,4,3,2	142,127,174,82,74,104	0,2110,4678,7408,13157,13616	NC_000078.7:51676290-51694776|NC_000078.7:51708496-51738204
mmu_circ_384	NC_000077.7	6263787	6267080	+	circRNA	18293	XM_036156413.1	2	3,4	192316	0,2977	NC_000077.7:6247199-6263787|NC_000077.7:6267080-6284532
mmu_circ_384	NC_000077.7	6263787	6267080	+	circRNA	18293	NM_001252282.1	2	3,4	192103	0,3190	NC_000077.7:6247199-6263787|NC_000077.7:6267080-6274877
	Abbreviations
	ID	The circRNA ID.
	Chromosome	Chromosome.
	start	Start of circular RNA.
	end	End of circular RNA.
	strand	(+) or (-) for strand.
	circType	Number of right read that can be mapped to the reference genome.
	geneName	ID of gene.
	isoform Name	ID of the isoform.
	exonCount	Number of exons.
	index	Index of exon or intron.

## Sheet: CircRNA_5_AB
CircRNA 5' Alternative Backsplicing
ID	chr	start	end	strand	absSite	HypoTH+T3_1_absCount	HypoTH+T3_1_PCU	HypoTH+T3_2_absCount	HypoTH+T3_2_PCU	HypoTH+T3_3_absCount	HypoTH+T3_3_PCU	Control_1_absCount	Control_1_PCU	Control_2_absCount	Control_2_PCU	Control_3_absCount	Control_3_PCU	HyperTH_1_absCount	HyperTH_1_PCU	HyperTH_2_absCount	HyperTH_2_PCU	HyperTH_3_absCount	HyperTH_3_PCU	HypoTH_1_absCount	HypoTH_1_PCU	HypoTH_2_absCount	HypoTH_2_PCU	HypoTH_3_absCount	HypoTH_3_PCU
mmu_circ_1539	NC_000068.8	76677731	76712183	-	76712183	334	0.008982	256	0.015625	201	0.004975	500	0.02	463	0.028078	563	0.040853	0	0	104	0.038462	0	0	115	0.017391	424	0.023585	376	0.053191
mmu_circ_799	NC_000079.7	11695851	11702899	-	11702899	4	0.75	0	0	0	0	0	0	0	0	0	0	0	0	0	0	0	0	0	0	0	0	0	0
mmu_circ_2045	NC_000067.7	43180857	43192414	-	43192414	9	0.888889	0	0	0	0	0	0	20	0.9	0	0	0	0	0	0	0	0	0	0	0	0	0	0
mmu_circ_1548	NC_000068.8	76688247	76712183	-	76712183	334	0.976048	256	0.949219	201	0.975124	500	0.914	463	0.926566	563	0.920071	0	0	104	0.903846	123	0.95935	115	0.93913	424	0.886792	376	0.843085
mmu_circ_2258	NC_000075.7	65701903	65702777	-	65702777	4	0.25	5	0.6	0	0	0	0	21	0.952381	0	0	5	0.8	0	0	0	0	4	0.75	51	0.921569	32	0.9375
mmu_circ_960	NC_000078.7	51694776	51708496	-	51708496	20	0.85	8	0.625	15	0.933333	20	0.9	27	0.851852	29	0.931034	6	0.666667	7	0.714286	16	0.75	10	0.8	42	0.904762	27	0.888889
	Abbreviations
	chrom	Chromosome
	start	Start of circular RNA.
	end	End of circular RNA.
	strand	+ or - for strand.
	absSite	Alternative back-splice site
	absCount	back-spliced read counts
	PCU	Percent Circularized-site Usage

## Sheet: CircRNA_3_AB
CircRNA 3' Alternative Backsplicing
ID	chr	start	end	strand	absSite	HypoTH+T3_1_absCount	HypoTH+T3_1_PCU	HypoTH+T3_2_absCount	HypoTH+T3_2_PCU	HypoTH+T3_3_absCount	HypoTH+T3_3_PCU	Control_1_absCount	Control_1_PCU	Control_2_absCount	Control_2_PCU	Control_3_absCount	Control_3_PCU	HyperTH_1_absCount	HyperTH_1_PCU	HyperTH_2_absCount	HyperTH_2_PCU	HyperTH_3_absCount	HyperTH_3_PCU	HypoTH_1_absCount	HypoTH_1_PCU	HypoTH_2_absCount	HypoTH_2_PCU	HypoTH_3_absCount	HypoTH_3_PCU
mmu_circ_3252	NC_000068.8	92044393	92061069	+	92061069	0	0	0	0	0	0	9	0.888889	0	0	0	0	0	0	0	0	0	0	0	0	5	0.8	0	0
mmu_circ_1539	NC_000068.8	76677731	76712183	-	76677731	7	0.428571	6	0.666667	4	0.25	17	0.588235	18	0.722222	25	0.92	0	0	5	0.8	0	0	9	0.222222	24	0.416667	32	0.625
mmu_circ_799	NC_000079.7	11695851	11702899	-	11695851	6	0.5	0	0	3	0.333333	22	0.863636	0	0	12	0.916667	0	0	0	0	0	0	0	0	0	0	7	0.857143
mmu_circ_2045	NC_000067.7	43180857	43192414	-	43180857	0	0	0	0	0	0	23	0.913043	0	0	0	0	0	0	0	0	0	0	0	0	0	0	0	0
mmu_circ_1548	NC_000068.8	76688247	76712183	-	76688247	493	0.661258	373	0.651475	298	0.657718	548	0.833942	516	0.831395	644	0.804348	211	0.606635	189	0.497354	194	0.608247	261	0.413793	564	0.666667	474	0.668776
mmu_circ_960	NC_000078.7	51694776	51708496	-	51694776	0	0	0	0	0	0	19	0.947368	0	0	0	0	0	0	0	0	0	0	0	0	0	0	0	0
mmu_circ_384	NC_000077.7	6263787	6267080	+	6267080	18	0.888889	0	0	0	0	18	0.944444	0	0	34	0.941176	0	0	6	0.833333	16	0.6875	11	0.909091	0	0	0	0
	Abbreviations
	chrom	Chromosome
	start	Start of circular RNA.
	end	End of circular RNA.
	strand	+ or - for strand.
	absSite	Alternative back-splice site
	absCount	back-spliced read counts
	PCU	Percent Circularized-site Usage
