# Supplementary material for: Novel Transcriptomic Interactomes of Noncoding RNAs in the Heart under Altered Thyroid Hormonal States
Source: Int J Mol Sci. 2023 Mar 31;24(7):6560. doi: 10.3390/ijms24076560 (PMC10095585; doi:10.3390/ijms24076560)
Supplement: Supplementary file 1 [file ijms-24-06560-s001.zip › Supplemental File S6 CircRNA KEGG enrichment.xlsx]

## Sheet: Supplemental File CircRNA KEGG 
Category	ID	Description	GeneRatio	BgRatio	pvalue	padj	Count	geneID
KEGG	mmu05410	Hypertrophic cardiomyopathy (HCM)	2|6	84|7916	0.000217361	0.0082082	2	22138|20191
KEGG	mmu05414	Dilated cardiomyopathy	2|6	90|7916	0.000248733	0.0082082	2	22138|20191
KEGG	mmu04380	Osteoclast differentiation	2|6	133|7916	0.000534278	0.0117541	2	14200|18033
KEGG	mmu04024	cAMP signaling pathway	2|6	198|7916	0.00116498	0.0192221	2	20191|18033
KEGG	mmu03440	Homologous recombination	1|6	28|7916	0.00747342	0.0468271	1	19365
KEGG	mmu00020	Citrate cycle (TCA cycle)	1|6	32|7916	0.00850028	0.0468271	1	18293
KEGG	mmu00380	Tryptophan metabolism	1|6	47|7916	0.0123425	0.0468271	1	18293
KEGG	mmu05030	Cocaine addiction	1|6	49|7916	0.0128538	0.0468271	1	18033
KEGG	mmu00310	Lysine degradation	1|6	53|7916	0.0138756	0.0468271	1	18293
KEGG	mmu05221	Acute myeloid leukemia	1|6	57|7916	0.0148965	0.0468271	1	18033
KEGG	mmu05134	Legionellosis	1|6	58|7916	0.0151516	0.0468271	1	18033
KEGG	mmu05321	Inflammatory bowel disease (IBD)	1|6	59|7916	0.0154066	0.0468271	1	18033
KEGG	mmu04621	NOD-like receptor signaling pathway	1|6	59|7916	0.0154066	0.0468271	1	18033
KEGG	mmu04623	Cytosolic DNA-sensing pathway	1|6	64|7916	0.0166808	0.0468271	1	18033
KEGG	mmu05212	Pancreatic cancer	1|6	66|7916	0.0171901	0.0468271	1	18033
KEGG	mmu05140	Leishmaniasis	1|6	67|7916	0.0174446	0.0468271	1	18033
KEGG	mmu04622	RIG-I-like receptor signaling pathway	1|6	69|7916	0.0179535	0.0468271	1	18033
KEGG	mmu04920	Adipocytokine signaling pathway	1|6	73|7916	0.0189706	0.0468271	1	18033
KEGG	mmu05220	Chronic myeloid leukemia	1|6	73|7916	0.0189706	0.0468271	1	18033
KEGG	mmu04917	Prolactin signaling pathway	1|6	74|7916	0.0192248	0.0468271	1	18033
KEGG	mmu05412	Arrhythmogenic right ventricular cardiomyopathy (ARVC)	1|6	74|7916	0.0192248	0.0468271	1	20191
KEGG	mmu05133	Pertussis	1|6	74|7916	0.0192248	0.0468271	1	18033
KEGG	mmu04662	B cell receptor signaling pathway	1|6	75|7916	0.0194788	0.0468271	1	18033
KEGG	mmu05132	Salmonella infection	1|6	78|7916	0.0202407	0.0468271	1	18033
KEGG	mmu04260	Cardiac muscle contraction	1|6	80|7916	0.0207483	0.0468271	1	20191
KEGG	mmu05222	Small cell lung cancer	1|6	85|7916	0.0220162	0.0468271	1	18033
KEGG	mmu04911	Insulin secretion	1|6	86|7916	0.0222697	0.0468271	1	20191
KEGG	mmu05215	Prostate cancer	1|6	89|7916	0.0230295	0.0468271	1	18033
KEGG	mmu04211	Longevity regulating pathway	1|6	96|7916	0.0248006	0.0468271	1	18033
KEGG	mmu04713	Circadian entrainment	1|6	98|7916	0.025306	0.0468271	1	20191
KEGG	mmu04620	Toll-like receptor signaling pathway	1|6	101|7916	0.0260638	0.0468271	1	18033
KEGG	mmu04972	Pancreatic secretion	1|6	103|7916	0.0265687	0.0468271	1	20191
KEGG	mmu04933	AGE-RAGE signaling pathway in diabetic complications	1|6	103|7916	0.0265687	0.0468271	1	18033
KEGG	mmu04064	NF-kappa B signaling pathway	1|6	104|7916	0.026821	0.0468271	1	18033
KEGG	mmu05142	Chagas disease (American trypanosomiasis)	1|6	104|7916	0.026821	0.0468271	1	18033
KEGG	mmu04660	T cell receptor signaling pathway	1|6	105|7916	0.0270733	0.0468271	1	18033
KEGG	mmu04066	HIF-1 signaling pathway	1|6	110|7916	0.0283339	0.0468271	1	18033
KEGG	mmu04931	Insulin resistance	1|6	111|7916	0.0285859	0.0468271	1	18033
KEGG	mmu05146	Amoebiasis	1|6	111|7916	0.0285859	0.0468271	1	18033
KEGG	mmu04668	TNF signaling pathway	1|6	112|7916	0.0288378	0.0468271	1	18033
KEGG	mmu05145	Toxoplasmosis	1|6	113|7916	0.0290896	0.0468271	1	18033
KEGG	mmu01200	Carbon metabolism	1|6	118|7916	0.0303478	0.0476895	1	18293
KEGG	mmu04722	Neurotrophin signaling pathway	1|6	122|7916	0.0313534	0.0481238	1	18033
KEGG	mmu04071	Sphingolipid signaling pathway	1|6	125|7916	0.0321069	0.0481604	1	18033
