# Supplementary material for: Novel Transcriptomic Interactomes of Noncoding RNAs in the Heart under Altered Thyroid Hormonal States
Source: Int J Mol Sci. 2023 Mar 31;24(7):6560. doi: 10.3390/ijms24076560 (PMC10095585; doi:10.3390/ijms24076560)
Supplement: Supplementary file 1 [file ijms-24-06560-s001.zip › Supplemental File S7 DEA miRNA.xlsx]

## Sheet: HypoTH vs Control
sRNA	HypoTH GROUP_readcount	Control GROUP_readcount	log2FoldChange	padj
mmu-miR-466i-5p	352.593	42.1158	2.344	0.00284				Upregulated
mmu-miR-1195	19.6113	1.98363	2.212	0.014336				Downregulated
mmu-miR-3470b	336.04	56.7948	2.1526	0.0013662
mmu-miR-5126	30.4974	5.65546	2.0107	0.00284
novel_1	13879.1	1929.61	2.0063	0.026507
mmu-miR-200a-3p	143.74	23.9782	1.9969	0.015685
mmu-miR-365-2-5p	8.11913	1.17918	1.9254	0.035639
mmu-miR-6538	304.502	74.5948	1.8593	7.447e-05
mmu-miR-365-1-5p	42.0397	9.35359	1.749	0.022209
mmu-miR-200b-3p	90.9629	28.7971	1.6296	1.5863e-08
mmu-miR-29b-2-5p	32.6134	115.312	-1.5205	0.026507
mmu-miR-208a-3p	19.6731	144.716	-2.1853	0.0040958
mmu-miR-208a-5p	1.68468	98.5205	-4.8306	1.2006e-17

## Sheet: HypoTH+T3 vs Control
miRNA	HypoTH+T3 Group Expression	Control Group Expression	log2FoldChange	padj
mmu-miR-206-3p	565.71	8.7696	5.3874	9.79e-28		Upregulated
mmu-miR-363-3p	135.369	4.10319	4.5753	2.46e-22		Downregulated
mmu-miR-122-5p	1076.1	32.0407	4.1866	2.91e-11
mmu-miR-122b-3p	1075.66	32.0407	4.1856	2.94e-11
mmu-miR-148a-3p	620923	33143.4	4.0584	2.23e-36
mmu-miR-126b-5p	3545.24	201.593	4.0486	6.27e-66
novel_33	16.5819	0.472762	3.7122	1.97e-07
mmu-miR-30f	10365.6	804.457	3.5721	8.74e-36
novel_49	8.38197	0	3.4238	4.21e-05
mmu-miR-98-3p	6.97241	0	3.2402	0.00013279
mmu-miR-1947-5p	376.616	38.4655	3.2221	1.77e-42
novel_47	15.1917	0.709143	2.9906	0.00013928
mmu-miR-203b-5p	115.402	14.2121	2.9057	2.27e-17
mmu-miR-7015-3p	29.4841	2.62515	2.8115	1.88e-05
mmu-miR-7043-3p	185.291	25.9662	2.7532	3.49e-21
mmu-miR-708-3p	88.1887	12.4701	2.7164	6.42e-17
novel_1	21446.5	2487.94	2.7081	2.23e-06
novel_59	23.5627	2.65158	2.6607	6.24e-06
mmu-miR-1964-3p	1729.17	264.503	2.5967	3.32e-15
mmu-miR-323-3p	32.6348	4.66066	2.5693	1.86e-08
mmu-miR-7068-3p	21.1159	2.95346	2.4783	6.02e-06
mmu-miR-151-3p	39639.2	7122.42	2.4357	3.18e-31
mmu-miR-704	3.40097	0	2.3328	0.010326
mmu-miR-378d	18.944	2.92358	2.3139	6.74e-05
mmu-miR-493-5p	24.9711	3.68182	2.266	0.00041153
novel_31	4.97992	0.236381	2.2593	0.011902
novel_20	9.06836	0.91565	2.2322	0.0065856
mmu-miR-99a-5p	1.87091e+06	177762	2.1852	0.011488
mmu-miR-1948-3p	5.41385	0.441739	2.1689	0.012477
mmu-miR-330-5p	1216.43	277.015	2.1043	4.87e-29
novel_54	2.70196	0	2.0986	0.022375
mmu-miR-9-3p	12.2306	1.39186	2.0909	0.014858
mmu-miR-770-3p	11.5393	0.883478	2.0728	0.02198
mmu-miR-204-3p	59.2733	13.0827	2.0658	8.71e-08
mmu-miR-24-1-5p	462.544	109.693	2.0476	5.74e-26
mmu-miR-3074-1-3p	447.71	108.543	2.0148	4.13e-24
mmu-miR-6952-3p	12.9901	2.41635	2.0092	0.0019937
mmu-miR-301a-5p	24.3464	5.19662	1.9652	0.00013279
mmu-miR-24-2-5p	5178.94	1328.01	1.9504	9.47e-48
mmu-miR-3074-2-3p	5158.52	1324.82	1.9482	1.27e-47
mmu-miR-1981-5p	1327.9	341.305	1.9316	6.39e-23
mmu-miR-381-3p	1020.83	259.05	1.93	1.14e-14
mmu-miR-671-3p	281.872	69.9039	1.9182	2.06e-08
mmu-miR-490-5p	258.227	67.2501	1.9032	1.37e-17
mmu-miR-455-5p	378.4	99.0823	1.8585	3.08e-08
mmu-miR-3071-3p	15.8808	3.36417	1.8563	0.0028015
mmu-miR-495-3p	59.1353	15.7309	1.8438	6.9e-09
mmu-miR-12184-3p	18.7334	4.31544	1.8311	0.0029963
mmu-miR-5615-3p	6.10348	1.12101	1.8247	0.022726
mmu-miR-5615-5p	6.10348	1.12101	1.8247	0.022726
mmu-miR-370-3p	231.456	60.9957	1.8222	3.1e-06
mmu-miR-431-5p	35.8511	8.47117	1.8212	0.00078858
mmu-miR-187-3p	155.941	43.4223	1.8166	3.32e-15
novel_25	20.133	4.89934	1.8147	0.0014712
mmu-miR-8120	9.68376	2.00793	1.7905	0.01195
mmu-miR-1933-3p	7.33373	1.38956	1.7675	0.034543
mmu-miR-409-3p	148.519	41.755	1.7661	6.4e-09
mmu-miR-130b-5p	43.9095	11.3316	1.7519	0.0011734
mmu-miR-129-5p	108.189	29.7904	1.741	5.51e-05
mmu-miR-129b-3p	108.189	29.7904	1.741	5.51e-05
mmu-miR-6988-3p	8.81536	1.80372	1.7294	0.027024
mmu-miR-5100	22.0899	5.51427	1.7117	0.0034203
mmu-miR-30e-3p	17600.2	5310.44	1.6951	1.56e-13
mmu-miR-12194-3p	8.72959	1.80257	1.694	0.027686
mmu-miR-23b-5p	28.6107	8.32671	1.6885	0.00017649
mmu-miR-200a-5p	11.8462	2.35201	1.6787	0.042016
mmu-let-7f-1-3p	28.5458	8.24774	1.6597	0.000769
mmu-miR-3474	35.5908	10.5343	1.6583	1.69e-05
mmu-miR-126a-3p	516331	161767	1.6386	1.45e-11
mmu-miR-106b-3p	1271.12	405.881	1.6238	4.68e-18
mmu-miR-511-5p	33.2475	9.70217	1.6074	0.00061568
mmu-miR-6944-3p	10.2128	2.4175	1.6029	0.026969
mmu-miR-219c-5p	15.6178	4.33957	1.6014	0.009627
mmu-miR-155-3p	13.7947	3.84038	1.5648	0.011961
novel_13	16.1365	4.61616	1.5643	0.010278
mmu-miR-8103	17.007	4.73963	1.5641	0.016514
mmu-miR-1191a	43.4234	14.1969	1.5495	6.29e-05
novel_38	54.6654	15.7691	1.5491	0.010257
novel_45	10.0352	2.9546	1.5328	0.023455
mmu-miR-369-3p	11.9502	3.0646	1.5267	0.033345
mmu-miR-128-3p	22029	7556.53	1.5176	1.88e-12
mmu-miR-881-3p	15.8625	4.67476	1.5058	0.027016
mmu-miR-362-5p	21.8093	70.1689	-1.51	0.00019565
mmu-miR-181a-5p	7838.83	22691.3	-1.5133	1.21e-15
mmu-miR-214-3p	244.468	713.989	-1.5166	2.68e-12
mmu-miR-122b-5p	2.00295	8.86611	-1.5386	0.045654
mmu-miR-6240	10.3112	38.0973	-1.543	0.019017
mmu-miR-340-5p	143.292	433.459	-1.5457	3.24e-09
mmu-miR-125b-2-3p	329.854	979.839	-1.547	6.6e-23
mmu-miR-5121	3.23159	11.7529	-1.5697	0.019489
mmu-miR-3535	45.6056	145.283	-1.5971	8.71e-08
mmu-miR-671-5p	5.49908	18.9552	-1.6021	0.0034917
mmu-miR-140-3p	4163.07	12787.7	-1.6104	2.03e-43
mmu-miR-150-5p	743.325	2351.17	-1.6234	2.61e-10
mmu-miR-3068-5p	49.5279	168.545	-1.6468	3.01e-05
mmu-miR-125b-5p	13247.3	42907.9	-1.6638	1.81e-13
mmu-miR-542-5p	1.39856	7.09571	-1.668	0.04437
mmu-miR-350-5p	19.1914	70.6491	-1.7	5.34e-06
mmu-miR-708-5p	1.21871	7.06239	-1.7051	0.036648
mmu-miR-664-3p	96.8891	333.335	-1.7217	4.56e-09
mmu-miR-350-3p	20.3244	75.8826	-1.7422	8.65e-06
mmu-miR-1291	8.46505	31.8148	-1.7675	0.001225
mmu-miR-200c-3p	52.076	181.005	-1.7676	7.98e-11
mmu-miR-511-3p	4.97884	19.7451	-1.8023	0.0063235
mmu-miR-138-5p	2.53258	12.7593	-1.8225	0.0091784
mmu-miR-19b-3p	5.75424	25.5345	-1.8249	0.00064536
mmu-miR-17-5p	152.05	573.11	-1.8346	2.02e-09
mmu-miR-466f-3p	1.13348	7.42976	-1.8383	0.034543
mmu-miR-466e-5p	0	2.95575	-1.8394	0.048507
mmu-miR-669b-5p	0	2.95575	-1.8394	0.048507
mmu-miR-3065-5p	6.01824	24.8357	-1.8662	0.00022077
mmu-miR-338-3p	6.01824	24.8357	-1.8662	0.00022077
mmu-miR-1943-3p	2.2675	11.9031	-1.8663	0.011028
mmu-miR-140-5p	122.524	470.382	-1.8727	1.07e-11
mmu-let-7a-2-3p	0.784243	7.42913	-1.8983	0.030538
mmu-miR-466c-5p	3.13697	17.2124	-1.9306	0.0023653
mmu-miR-181c-5p	47.5515	183.586	-1.9344	2.5e-15
mmu-miR-23a-3p	2781.82	10896	-1.9422	1.25e-24
mmu-miR-15b-5p	91.3163	370.417	-1.9752	9.59e-25
mmu-miR-130a-3p	41.6107	172.071	-1.9793	7.06e-17
mmu-miR-701-5p	0	3.42966	-1.98	0.03245
mmu-miR-467a-3p	0.349775	5.25981	-1.9938	0.024886
mmu-miR-467d-3p	0.349775	5.25981	-1.9938	0.024886
mmu-miR-144-5p	1.3991	12.5026	-1.9958	0.016588
mmu-miR-872-5p	128.652	555.411	-2.0075	4.27e-09
mmu-miR-190a-5p	5.40393	29.6199	-2.0183	0.0023908
mmu-miR-154-5p	6.45163	28.6404	-2.0363	0.00022077
novel_23	0.349775	5.57861	-2.0537	0.02014
mmu-miR-299a-3p	3.84536	18.8357	-2.0586	0.0017326
mmu-miR-299a-5p	1.04878	7.77268	-2.0672	0.011575
mmu-miR-191-5p	5239.37	23190.5	-2.1167	1.08e-28
mmu-let-7i-3p	35.6887	170.612	-2.1301	3.16e-10
mmu-miR-22-3p	20932.1	94781.2	-2.1458	1.81e-26
mmu-miR-30e-5p	3680.58	17019.8	-2.1658	2.02e-21
mmu-miR-1843a-3p	29.8487	144.32	-2.1853	9.49e-14
mmu-miR-669a-3p	2.43688	16.3895	-2.194	0.002153
mmu-miR-378a-5p	2825.88	13525	-2.1969	1.07e-15
mmu-miR-126b-3p	412.018	2023.31	-2.2066	5.54e-12
mmu-miR-126a-5p	412.452	2026.83	-2.2077	5.36e-12
mmu-miR-93-5p	691.106	3305.27	-2.2123	2.17e-23
mmu-miR-199b-5p	55.964	300.789	-2.2187	6.74e-07
mmu-miR-425-3p	38.9077	189.727	-2.2252	5.16e-18
mmu-miR-30c-1-3p	110.772	538.971	-2.2254	4.99e-26
mmu-miR-467d-5p	5.14823	26.3065	-2.238	0.00011575
mmu-miR-106b-5p	33.4008	177.32	-2.2591	1.79e-11
mmu-miR-210-3p	103.364	514.321	-2.2624	2.46e-25
mmu-miR-199a-5p	1630.06	8059.59	-2.2779	3.9e-39
mmu-miR-497a-5p	107.541	583.535	-2.3715	4.91e-25
mmu-miR-6516-3p	0.434468	8.94884	-2.4445	0.0041636
mmu-miR-16-5p	752.016	4517.6	-2.5003	2.36e-17
mmu-miR-144-3p	0	5.96781	-2.5149	0.004666
mmu-miR-874-3p	33.4844	210.183	-2.5173	2.13e-15
mmu-miR-490-3p	533.975	3245.82	-2.5523	2e-30
mmu-miR-99a-3p	0.349775	9.12432	-2.5633	0.002153
mmu-miR-17-3p	5.58378	39.6566	-2.5973	4.79e-08
mmu-miR-466a-3p	0.349775	9.72316	-2.6061	0.0018061
mmu-miR-29b-2-5p	20.2413	151.143	-2.6228	7e-10
mmu-miR-466b-3p	0.349775	9.92852	-2.6315	0.0015741
mmu-miR-107-3p	191.362	1325.91	-2.6878	1.83e-19
mmu-miR-15a-5p	11.0834	93.6946	-2.8083	8.1e-10
mmu-miR-135a-5p	11.4326	102.352	-2.8952	5.13e-10
mmu-miR-322-5p	69.2694	598.631	-2.9366	6.83e-16
mmu-miR-339-5p	105.087	926.098	-3.0593	2.3e-31

## Sheet: HypoTH + T3 vs HypoTH
miRNA	HypoTH+T3 Group Expression	HypoTH Group Expression	log2FoldChange	padj
mmu-miR-208a-5p	47.8124	1.22959	4.3692	8e-12		Upregulated
mmu-miR-126b-5p	1912.58	122.712	3.6193	1.74e-15		Downregulated
mmu-miR-208a-3p	124.325	13.6525	2.603	1.77e-05
mmu-miR-146a-5p	4058.36	807.615	2.2356	6.26e-13
mmu-miR-126a-3p	278733	55836.9	2.2174	2.37e-11
mmu-miR-99a-5p	1.01596e+06	160270	2.1934	0.0011674
mmu-miR-30f	5642.13	864.036	2.1865	0.0018411
mmu-miR-301a-5p	13.2675	1.02252	2.1282	0.012549
mmu-miR-1247-5p	5.40653	0.204505	2.1259	0.021322
mmu-let-7f-1-3p	15.4173	2.80579	2.0319	0.0054565
mmu-miR-3074-1-3p	241.618	56.5727	1.9925	2.19e-06
mmu-miR-378d	10.3009	1.72086	1.9873	0.02318
mmu-miR-24-1-5p	249.633	58.2936	1.9861	4.58e-06
mmu-miR-511-5p	18.0524	3.13254	1.9662	0.003028
mmu-miR-497b	7.65798	0.613514	1.9428	0.030937
mmu-miR-7015-3p	16.0724	2.47904	1.9077	0.037484
mmu-miR-219c-5p	8.45068	1.701	1.8143	0.040449
mmu-miR-30e-3p	9563.2	2551.28	1.8132	5.91e-07
mmu-miR-467a-5p	257.782	72.0484	1.7698	5.91e-07
mmu-miR-467b-5p	257.782	72.0484	1.7698	5.91e-07
mmu-miR-203b-5p	62.1446	17.5535	1.742	2.6e-05
mmu-miR-22-5p	2541.73	747.624	1.7144	5.16e-11
mmu-miR-1191a	23.3389	6.24778	1.683	0.0073
mmu-miR-7068-3p	11.4707	2.53888	1.675	0.038658
mmu-miR-29c-5p	736.58	245.365	1.5295	6.77e-06
mmu-miR-340-3p	295.337	99.5353	1.5163	2.3e-05
mmu-miR-6538	63.0615	218.18	-1.5299	0.023593
mmu-miR-574-5p	47.5903	148.29	-1.5313	0.00017041
mmu-miR-574-3p	95.6159	288.482	-1.5459	8.83e-09
mmu-miR-365-3p	75.1201	264.181	-1.5633	0.016073
mmu-miR-106b-5p	17.9016	69.4731	-1.5753	0.040863
mmu-miR-690	231.678	846.355	-1.6235	0.0092495
mmu-miR-425-3p	21.0111	70.9172	-1.6248	0.0011144
mmu-miR-455-3p	86.9997	324.371	-1.6736	0.0034634
mmu-miR-350-3p	10.9054	51.0668	-1.7541	0.024206
mmu-miR-200b-3p	18.0605	64.4443	-1.7656	5.91e-07
mmu-miR-199a-5p	878.045	3643.59	-1.7748	0.0041895
mmu-miR-210-3p	55.7165	232.869	-1.8388	0.0010215
mmu-miR-150-5p	402.188	1577.05	-1.8397	1.62e-05
mmu-miR-410-3p	4.59497	19.4763	-1.8767	0.001059
mmu-miR-1943-3p	1.22329	7.37242	-1.877	0.023593
mmu-miR-17-3p	3.02412	16.785	-1.9536	0.013452
novel_41	0	5.88132	-2.0385	0.033968
mmu-miR-339-5p	56.7473	297.121	-2.0814	0.00044923
mmu-miR-200a-3p	13.3935	99.7631	-2.0857	0.011602
mmu-miR-19b-3p	3.07231	20.4514	-2.0891	0.0066285
mmu-miR-3470b	44.9634	239.472	-2.099	0.00037089
mmu-miR-214-3p	131.985	615.853	-2.1886	2.56e-34
mmu-miR-669a-3p	1.31155	12.8768	-2.2472	0.0084303
mmu-miR-3470a	9.86505	75.0142	-2.2611	0.0027743
mmu-miR-208b-5p	0	16.7107	-2.268	0.015023
mmu-miR-708-5p	0.645759	8.17058	-2.4036	0.0032368
mmu-miR-193b-3p	75.2818	467.876	-2.5622	3.06e-20
mmu-miR-1195	0.807496	14.2187	-2.626	0.0016013
mmu-miR-709	0.185832	7.29016	-2.7589	0.0011656
mmu-miR-299a-5p	0.577532	10.7943	-2.7854	0.00060969
mmu-miR-466i-5p	11.3436	250.022	-3.3098	5.76e-06

## Sheet: HyperTH vs Control
miRNA	HyperTH Group Expression	Control Group Expression	log2FoldChange	padj
mmu-miR-363-3p	153.773	4.23839	4.5385	3.76e-18		Upregulated
mmu-miR-206-3p	287.487	8.98638	4.5084	1.74e-21		Downregulated
mmu-miR-148a-3p	757602	34130	4.153	9.88e-24
mmu-miR-126b-5p	3442.23	207.16	3.8827	3.72e-33
novel_49	8.52635	0	3.3628	4.51e-05
mmu-miR-7043-3p	249.658	26.7281	3.1316	1.49e-29
mmu-miR-99a-5p	1.62601e+06	182395	3.1234	4.86e-85
mmu-miR-1947-5p	350.399	39.4615	3.0406	3.56e-25
mmu-miR-7225-5p	49.2787	3.27971	3.0255	1.31e-05
mmu-miR-7068-3p	28.1005	3.03891	2.8175	3.39e-07
mmu-miR-30f	6035.45	826.931	2.8148	4.02e-39
novel_25	39.3546	5.00547	2.7156	3.48e-09
novel_47	12.06	0.742423	2.5636	0.0018705
mmu-miR-708-3p	80.264	12.7889	2.5096	2.94e-11
novel_59	21.3696	2.71899	2.4813	4.93e-05
mmu-miR-3473b	8.34542	0.694523	2.4765	0.0016423
mmu-miR-770-3p	9.89355	0.907443	2.4452	0.001512
mmu-miR-151-3p	40231.3	7291.96	2.422	1.85e-31
mmu-miR-378d	20.2871	2.99435	2.3811	5.16e-05
mmu-miR-1306-3p	18.1804	2.50941	2.372	0.00012725
novel_34	11.7248	1.6053	2.2649	0.0010818
mmu-miR-8120	15.6018	2.04901	2.2635	0.0017134
mmu-miR-1981-5p	1721.74	349.451	2.263	2.1e-29
novel_1	13673.7	2560.63	2.2536	6.67e-08
mmu-miR-203b-5p	78.7074	14.6616	2.2438	6.44e-07
mmu-miR-323-3p	30.778	4.76467	2.2369	0.00046847
mmu-miR-1247-5p	21.1609	3.66099	2.2157	7.27e-05
novel_33	6.8811	0.494948	2.163	0.014463
mmu-miR-200a-5p	17.6551	2.3924	2.1297	0.0051743
mmu-miR-1964-3p	1250.63	270.329	2.1278	6.48e-12
novel_6	6.27877	0.491612	2.0887	0.019103
mmu-miR-7015-3p	15.8011	2.66442	2.0456	0.0035939
mmu-miR-1247-3p	10.7287	1.88399	2.0365	0.0035129
mmu-miR-187-3p	188.106	44.5628	2.023	1.5e-13
novel_31	4.55641	0.247474	2.0159	0.02789
mmu-miR-298-5p	10.3324	1.60197	1.974	0.013681
mmu-miR-7048-3p	5.33043	0.659968	1.9268	0.026103
mmu-miR-5100	25.6746	5.62755	1.9248	0.00026685
mmu-miR-704	3.07615	0	1.9245	0.035503
mmu-miR-330-5p	1096.07	283.942	1.9033	1.76e-14
mmu-miR-1298-5p	9.89355	1.23748	1.8852	0.030732
novel_20	7.08468	0.945334	1.8438	0.03532
mmu-miR-6964-3p	2.46041	0	1.8309	0.047323
mmu-miR-7676-3p	2.27023	0	1.8115	0.049737
mmu-miR-431-5p	33.3498	8.65645	1.7947	6.72e-05
novel_38	61.8626	16.2836	1.7889	5.82e-05
mmu-miR-126a-3p	602491	166564	1.7743	1.68e-07
mmu-miR-543-3p	81.8943	23.0195	1.7643	5.55e-09
mmu-miR-204-3p	49.7107	13.4177	1.7561	2.92e-05
mmu-miR-1945	7.852	1.52285	1.7215	0.030559
mmu-miR-124-5p	6.8107	1.22403	1.7102	0.047417
mmu-miR-129-5p	114.311	30.3763	1.7054	0.0014676
mmu-miR-490-5p	235.854	68.8623	1.705	1.31e-07
mmu-miR-24-1-5p	383.041	112.62	1.704	6.41e-08
mmu-miR-495-3p	55.3978	16.1467	1.7019	3e-06
mmu-miR-129b-3p	113.818	30.3763	1.7009	0.0014676
mmu-miR-1938	8.15524	1.8461	1.6953	0.021989
mmu-miR-12184-3p	17.7095	4.42462	1.6905	0.0094065
novel_13	18.239	4.74788	1.6823	0.0057113
mmu-miR-3074-1-3p	371.993	111.424	1.6753	1.89e-07
mmu-let-7f-1-3p	29.6379	8.48798	1.6648	0.0003731
mmu-miR-106b-3p	1308.08	416.503	1.6309	3.29e-20
mmu-miR-5126	25.4593	7.48355	1.6132	0.001442
mmu-miR-409-3p	133.657	42.7359	1.5845	2.99e-07
mmu-miR-6952-3p	9.56765	2.46818	1.5749	0.026595
mmu-miR-671-3p	222.365	71.371	1.5684	2.68e-06
mmu-miR-132-5p	694.473	230.548	1.5672	1.83e-14
mmu-miR-146a-5p	10488	3429.95	1.5587	1.84e-07
mmu-miR-666-5p	10.8351	2.88401	1.5206	0.040885
mmu-miR-145a-5p	5747.6	17186.9	-1.5243	8.49e-07
mmu-miR-181a-1-3p	84.7323	254.278	-1.5316	1.44e-08
mmu-miR-133a-3p	61010.3	180766	-1.5323	2.84e-10
mmu-miR-23a-3p	3694.81	11186.5	-1.5751	3.54e-16
mmu-miR-300-3p	44.8886	139.924	-1.5759	8.77e-08
mmu-miR-181a-5p	7359.51	23240.2	-1.6007	1.71e-07
mmu-miR-3068-3p	36.9847	120.348	-1.6126	8.05e-06
mmu-miR-374c-3p	204.406	652.459	-1.6177	5.77e-08
mmu-miR-374b-5p	204.406	653.115	-1.619	5.73e-08
mmu-miR-106b-5p	53.2565	182.517	-1.6712	4.43e-06
mmu-miR-466c-5p	4.34359	17.7106	-1.6795	0.0081592
mmu-miR-467d-5p	7.67777	26.9658	-1.6796	0.0010818
mmu-miR-664-3p	103.653	341.237	-1.6807	2.2e-10
mmu-miR-17-5p	178.451	589.843	-1.6821	1.09e-10
mmu-miR-411-5p	187.083	623.85	-1.6935	6.59e-13
mmu-let-7i-3p	50.6245	174.581	-1.7108	7.88e-08
mmu-miR-17-3p	11.4056	40.6722	-1.7117	5.36e-05
mmu-miR-130a-3p	49.4206	176.631	-1.7228	1.56e-05
mmu-miR-3068-5p	47.9487	173.795	-1.7247	3.59e-05
mmu-miR-205-5p	16.9195	95.6895	-1.735	0.040957
mmu-miR-125b-5p	12568.6	43913	-1.7438	5.92e-09
mmu-miR-365-3p	118.642	414.48	-1.7563	1.31e-10
mmu-miR-450b-5p	6.36249	27.5217	-1.7576	0.0045233
mmu-miR-3098-3p	5.02718	20.5202	-1.7578	0.0034099
mmu-miR-15b-5p	107.248	380.437	-1.7692	1.66e-09
mmu-miR-210-3p	146.162	526.796	-1.7758	6.41e-09
mmu-miR-26a-2-3p	41.7923	151.038	-1.7778	1.66e-09
mmu-miR-700-5p	33.9655	125.722	-1.7908	8.94e-07
mmu-miR-101a-3p	446.894	1626.22	-1.7941	1.07e-08
mmu-miR-874-3p	56.0971	215.122	-1.8111	3.85e-06
mmu-miR-125b-2-3p	278.507	1005.47	-1.8208	1.07e-20
mmu-miR-6240	9.69667	39.1882	-1.8322	0.0002404
mmu-miR-140-3p	3638.75	13127.3	-1.8375	1.74e-41
mmu-miR-181c-5p	48.0232	188.241	-1.8414	9.95e-07
mmu-miR-29c-3p	24.4724	94.942	-1.8593	7.78e-08
mmu-miR-362-5p	18.2682	72.0891	-1.8641	1.26e-07
mmu-miR-466q	0.918984	6.73446	-1.8851	0.025881
mmu-miR-466f-3p	0.857826	7.65299	-1.892	0.030355
mmu-miR-191-5p	6135.75	23759.5	-1.9018	3.7e-13
mmu-miR-1843a-3p	37.2678	148.01	-1.9161	2.37e-11
mmu-miR-5116	0	3.44807	-1.9405	0.035503
mmu-miR-99a-3p	1.22223	9.41544	-1.953	0.016389
mmu-miR-872-5p	136.357	572.437	-1.9841	9.41e-10
mmu-miR-133a-5p	685.01	2841.36	-2.0205	1.07e-25
mmu-miR-93-5p	786.649	3398.33	-2.0752	3.03e-24
mmu-miR-497a-5p	131.707	599.787	-2.1028	1.61e-12
mmu-miR-467e-5p	1.96699	13.8601	-2.1478	0.0042556
mmu-miR-30c-1-3p	109.819	552.428	-2.2289	1.13e-11
mmu-miR-378a-5p	2809.29	13845.3	-2.2333	4.75e-16
mmu-miR-15a-5p	17.5872	96.5504	-2.2401	1.63e-06
mmu-miR-190a-5p	4.36624	30.6519	-2.2718	0.00096157
mmu-miR-490-3p	642.059	3325.28	-2.312	4.85e-20
mmu-miR-16-5p	861.966	4656.15	-2.3362	2.45e-13
mmu-miR-6516-3p	0.493422	9.25376	-2.3934	0.0049653
mmu-miR-107-3p	245.974	1361.18	-2.4125	2.34e-26
mmu-miR-29b-2-5p	26.4286	154.726	-2.4151	3.35e-09
mmu-miR-140-5p	83.4916	484.023	-2.4295	3.4e-15
novel_23	0	5.70333	-2.4323	0.0057953
mmu-miR-199b-5p	49.578	309.04	-2.4665	1.52e-10
mmu-miR-93-3p	0.728808	11.8024	-2.4911	0.0016734
mmu-miR-22-3p	15985	97173.5	-2.5378	9.88e-24
mmu-miR-199a-5p	1316.21	8273.21	-2.5913	1.64e-27
mmu-miR-339-5p	143.618	947.704	-2.6155	1.4e-17
mmu-miR-30e-5p	2719.65	17510.8	-2.617	1.21e-24
mmu-miR-126b-3p	295.115	2086.39	-2.685	1.19e-14
mmu-miR-126a-5p	295.115	2090.03	-2.6874	1.17e-14
mmu-miR-135a-5p	12.7569	105.658	-2.7686	4.72e-09
mmu-miR-511-3p	1.54142	20.3515	-2.8543	5.42e-05
mmu-miR-322-5p	60.3503	617.453	-3.1192	1.83e-14

## Sheet: HyperTH vs HypoTH
miRNA	HyperTH Group Expression	HypoTH Group Expression	log2FoldChange	padj
mmu-miR-208a-5p	77.9443	1.24949	4.5637	6.71e-13		Upregulated
mmu-miR-126b-5p	1884.61	126.234	3.4186	1.44e-11		Downregulated
mmu-miR-1247-5p	11.6187	0.218395	2.6987	0.0010126
mmu-miR-146a-5p	5762.68	836.554	2.5811	8.19e-11
mmu-miR-126a-3p	330639	57822.3	2.2969	4.22e-07
mmu-miR-1247-3p	5.88082	0	2.2768	0.012207
novel_25	21.5635	3.37256	2.248	0.00071151
mmu-miR-208a-3p	90.9994	14.2837	2.0705	0.0025974
mmu-miR-7225-5p	27.4892	2.81906	2.0247	0.02324
mmu-miR-99a-5p	894235	164566	2.0199	0.0021798
mmu-miR-1983	105.935	21.8472	2.0109	1.5e-05
mmu-let-7f-1-3p	16.3024	2.89496	2.0064	0.0053882
mmu-miR-378d	11.108	1.76218	1.9113	0.030881
mmu-miR-7068-3p	15.3231	2.63576	1.858	0.023778
mmu-miR-511-5p	15.1715	3.25585	1.6378	0.030859
mmu-miR-3074-1-3p	202.772	58.2164	1.6317	0.0025207
mmu-miR-24-1-5p	208.853	59.9786	1.6277	0.0027055
mmu-miR-467a-5p	236.169	74.3697	1.608	1.07e-06
mmu-miR-467b-5p	236.169	74.3697	1.608	1.07e-06
mmu-miR-29c-5p	781.991	252.391	1.5656	3.99e-06
mmu-miR-30f	3320.14	885.449	1.5423	0.039731
mmu-miR-132-5p	380.305	123.355	1.5171	0.00071151
mmu-miR-140-3p	1997.87	6131.47	-1.5226	0.00012991
mmu-miR-6538	71.055	224.02	-1.5255	0.00071151
mmu-miR-3470b	62.8001	245.205	-1.5918	0.030859
mmu-miR-339-5p	78.4361	308.32	-1.6626	0.012678
mmu-miR-690	225.56	871.261	-1.6877	0.0052929
mmu-miR-3473a	3.35088	15.1579	-1.7028	0.029502
mmu-miR-199b-5p	27.0097	119.828	-1.7088	0.023711
mmu-miR-365-3p	65.1937	274.522	-1.7751	0.004704
mmu-miR-222-5p	4.02238	20.9013	-1.7809	0.02435
mmu-miR-410-3p	4.51549	20.1093	-1.797	0.004869
mmu-miR-299a-5p	1.41514	11.108	-1.8509	0.044463
novel_41	0	5.98465	-1.8996	0.045231
novel_37	0.779055	6.59332	-1.95	0.029502
mmu-miR-199a-5p	719.344	3788.92	-2.0052	0.0018669
mmu-miR-208b-5p	0	17.2774	-2.2496	0.013276
mmu-miR-709	0.586274	7.5428	-2.2546	0.0091848
mmu-miR-193b-3p	78.3692	482.688	-2.4647	1.42e-11
mmu-miR-466i-5p	20.221	256.053	-2.602	0.00071151

## Sheet: HyperTH vs HypoTH+T3
miRNA	HyperTH Group Expression	HypoTH+T3 Group Expression	log2FoldChange	padj
mmu-miR-7225-5p	35.5703	2.00359	1.8921	0.0048751		Upregulated
						Downregulated
