# Supplementary material for: Novel Transcriptomic Interactomes of Noncoding RNAs in the Heart under Altered Thyroid Hormonal States
Source: Int J Mol Sci. 2023 Mar 31;24(7):6560. doi: 10.3390/ijms24076560 (PMC10095585; doi:10.3390/ijms24076560)
Supplement: Supplementary file 1 [file ijms-24-06560-s001.zip › Supplemental File S8 miRNA GO enrichment all groupwise comparisons.xlsx]

## Sheet: HypoTHvsControl
GO_accession	Description	Term_type	Over_represented_pValue	Corrected_pValue	CAD_item	CAD_list	Bg_item	Bg_list	Gene_names
GO:0044763	single-organism cellular process	biological_process	1.01e-51	3.39e-48	2156	9562	3294	17789	16568,16569,13347,80901,171195,69710,93834,268973,93689,77573,12049,13842,233276,227059,242022,627111,215654,12638,20852,74463,19158,669149,110524,381293,11984,329795,14673,244867,383258,53945,20192,104215,66922,29863,14715,73940,12122,320795,16565,208846,20403,19411,67844,66691,100312473,21898,22301,19645,12290,14368,97998,240518,70349,209737,73284,171272,110157,13844,78482,12728,632671,67771,99…
GO:0050794	regulation of cellular process	biological_process	1.13e-48	9.49e-46	1967	9562	2991	17789	18430,108071,11855,234094,20371,71063,108068,12769,13380,24132,19345,12578,23963,52502,18752,11622,14676,381489,18846,382019,272382,30938,320292,19384,112694759,58996,235633,234959,19419,228543,73246,14815,100125586,235028,382045,234358,546983,331461,268480,71640,22698,14011,269053,69944,18992,14427,217371,113855,76308,18509,225849,241489,434117,22712,11783,100043103,20465,67367,54723,231724,5412…
GO:0050789	regulation of biological process	biological_process	2.52e-48	1.69e-45	1985	9562	3024	17789	70762,12576,11891,73046,56552,98710,14816,20847,108655,319939,12753,70839,64144,105245,72667,668725,233071,404286,72065,22059,252905,232201,142688,13557,56743,407812,17342,11512,15229,210162,11983,436090,22758,233056,229714,70355,11733,18577,57246,23958,66869,24001,328274,76742,52065,18128,232791,211896,18032,75424,229542,81601,217866,18798,100233208,14527,66755,69903,52696,665227,243979,22402,14…
GO:0065007	biological regulation	biological_process	1.38e-45	7.75e-43	2004	9562	3075	17789	17537,13543,18227,110197,74352,212281,75547,19214,19732,19731,22433,24066,408062,22314,17932,270192,117600,14238,666311,27049,22312,22678,667180,72736,19416,73729,100316903,24058,71966,210583,226304,94214,238871,171207,21687,208372,171273,242620,210105,105785,74149,57782,17125,69908,17975,245572,93681,230777,100043381,237716,14062,77200,677884,231591,74012,108961,18619,72433,17925,218461,223881,1…
GO:0007154	cell communication	biological_process	3.54e-42	1.7e-39	1214	9562	1765	17789	71302,77407,11552,12669,12549,171186,99296,110893,69288,14679,52666,14747,22418,65247,56044,171249,54672,230735,64143,627805,76229,74018,26364,78514,12765,244114,22419,18441,232237,58861,16995,627537,319387,18390,113846,211578,217166,18176,675969,18575,26382,22409,114715,26424,73341,242202,224572,224582,107746,380921,20663,19418,18574,14367,171256,271639,21834,14707,113856,66066,26381,171274,2392…
GO:0051716	cellular response to stimulus	biological_process	5.82e-42	2.45e-39	1249	9562	1824	17789	319642,53901,12229,19359,22305,328759,18755,21933,71709,619697,214952,217143,22296,404291,17199,19769,77596,64297,625068,65257,15551,14681,228359,192786,100042781,75415,26379,19417,76206,68708,415115,17356,338346,14365,22427,17126,52389,170770,72585,623734,56468,245424,53902,544817,384220,93735,211651,18442,14525,16923,277854,228850,14699,226652,331374,171235,99633,54485,19340,20607,22412,66725,2…
GO:0023052	signaling	biological_process	8.15e-42	3.05e-39	1211	9562	1762	17789	12802,109333,381112,19739,171189,23921,16330,435529,666085,15466,14919,56193,26380,117589,171255,252837,69721,224129,387285,13877,235854,227624,11836,78541,30044,432735,12775,252910,276952,18802,98417,667060,12772,72978,14745,142980,672125,171238,233919,22408,626828,269437,19415,217944,330914,12267,71085,11553,382018,113864,243628,12773,21337,217154,26423,243764,19414,14163,433070,15564,19326,115…
GO:0044700	single organism signaling	biological_process	2.13e-41	7.16e-39	1206	9562	1756	17789	14702,226751,13361,21833,14786,22411,14683,627280,23805,18053,171250,637896,665150,19766,171277,14738,245650,13609,210044,546981,17131,140743,12774,213439,67295,67245,16180,56077,53791,11848,104111,107449,235442,16182,209776,16801,18845,68526,109880,18131,19346,81015,12500,19016,110168,208666,100042653,18101,240505,56696,620246,20849,223666,434110,11614,16443,16428,381413,636697,19730,113850,1712…
GO:0007165	signal transduction	biological_process	7.14e-41	2.18e-38	1197	9562	1744	17789	15560,14366,171254,18803,237362,69601,384522,70419,71824,14829,19338,15562,16337,12671,192678,79566,171271,75276,629079,18573,18754,14918,113863,23912,14677,22413,70771,73707,13838,54195,81006,59040,100042225,99326,13848,16179,114713,270190,12057,17128,211223,19330,211577,13544,11539,66985,27387,12169,627367,171257,15550,93897,69834,71609,208898,269902,110789,26932,319217,21682,107934,15559,10154…
GO:0044699	single-organism process	biological_process	1.37e-32	3.07e-30	2391	9562	3852	17789	20527,69601,170441,171254,14366,56774,75276,171271,192678,79566,12671,16337,382571,71824,14829,171429,70419,18526,384522,66500,54195,15166,93885,73707,66868,113863,23912,22413,74446,16179,240960,100042225,20272,99326,16576,240595,59040,108052,50875,27387,12725,22329,72027,54004,380918,94044,211577,19330,17128,211223,237213,26932,71609,269902,269152,237891,15550,12169,51791,19395,14082,50782,12560…
GO:0035556	intracellular signal transduction	biological_process	1.59e-32	3.34e-30	364	9562	455	17789	243621,106572,320292,19384,245650,30938,210044,140743,18752,217217,19769,12700,226751,19345,12229,53901,319642,18755,73728,214952,234094,16801,19417,68526,68708,415115,76308,109934,217371,109880,544963,170770,67295,54720,268480,56077,11848,104111,65257,228543,19419,18796,192157,235442,235633,192786,228850,223254,240505,331374,19340,56468,19346,53902,54126,69299,16923,208666,277854,56692,68854,193…
GO:0043412	macromolecule modification	biological_process	6.26e-26	1.17e-23	729	9562	1056	17789	18596,76571,263803,22367,75763,13537,20443,13837,20187,19713,19878,27374,29857,108737,19277,67071,382083,22088,64293,100040244,236733,100043638,13844,20868,110157,26938,70225,56424,67534,106763,17691,27103,244895,18769,674895,240119,320795,13400,12649,16202,72102,102637973,140780,207304,56405,116940,319520,20452,241636,18160,56542,68961,320139,192656,107589,12323,14917,69635,13839,13200,98267,241…
GO:0006464	cellular protein modification process	biological_process	7.29e-26	1.23e-23	708	9562	1022	17789	13631,20779,16428,56637,382030,74410,22625,319263,140859,67333,100043645,16542,228785,15259,74270,16706,80915,67285,69847,319953,24110,12168,213084,105787,216835,58988,269881,54651,16589,227154,19250,20877,12978,14479,17165,50523,381390,101100,226419,240505,69171,19877,19274,22165,238323,19279,171167,11652,242726,22241,53625,15162,30940,28000,244418,68273,13549,112694759,77976,26563,72137,75607,1…
GO:0036211	protein modification process	biological_process	7.29e-26	1.23e-23	708	9562	1022	17789	100043638,236733,100040244,19277,64293,382083,67071,22088,106763,17691,67534,674895,18769,27103,244895,110157,20868,13844,56424,26938,70225,22367,75763,20443,13537,18596,263803,76571,29857,27374,108737,20187,19713,13837,19878,319520,20452,207304,56405,56542,241636,18160,13400,12649,320795,240119,102637973,140780,16202,72102,13200,98267,13839,100756,17152,72344,241656,68961,12323,107589,69635,1491…
GO:0050896	response to stimulus	biological_process	3.47e-24	5.08e-22	1382	9562	2169	17789	19731,24066,22314,18227,13543,110197,75547,19214,19732,667180,22312,19416,12480,270192,117600,12479,171273,69908,17125,71966,24058,238871,94214,226304,171207,14972,209558,208372,21687,16191,102443350,230777,14963,237716,21926,14062,218461,627191,14309,243743,223881,80718,70784,17686,74012,231591,18619,17925,72433,72318,19334,56212,66508,68010,100042810,246710,13542,243277,14678,233081,68566,66537…
GO:0006810	transport	biological_process	5.59e-24	7.34e-22	763	9562	1123	17789	66631,69640,20277,328563,268345,74096,14402,74252,72002,227059,74105,20536,53330,101488,77573,51801,277898,100561,76376,55951,224088,242607,76306,11979,12638,66859,27421,20271,11778,20537,14394,53611,108652,56305,16531,237082,74325,11984,11441,11776,56447,16439,73658,208760,59033,240444,57014,213827,74463,12788,217316,212980,20278,56807,69596,53945,20192,110886,208169,26372,110935,11777,67397,110…
GO:0051234	establishment of localization	biological_process	5.67e-24	7.34e-22	766	9562	1128	17789	56774,22785,11827,20336,73102,102680,20527,26874,170441,16491,11977,171429,16508,57780,382571,53881,224661,109342,28248,11966,20191,19300,18440,16538,24060,231999,16518,68775,66868,15165,11771,12847,67821,22318,218103,66500,20499,12992,14654,67028,71446,66384,20529,75761,15166,252903,56365,16502,20272,117591,64933,381884,240595,24045,74446,20501,110834,56418,11732,319800,230810,233649,328561,1080…
GO:0051179	localization	biological_process	4.42e-23	5.51e-21	776	9562	1150	17789	26874,20527,102680,170441,56774,22785,73102,11827,20336,11966,28248,20191,16538,19300,18440,16491,382571,57780,16508,11977,171429,13138,224661,53881,109342,218103,66500,14654,12992,20499,71446,67028,20529,75761,15166,252903,66384,231999,16518,24060,15165,66868,11771,68775,22318,12847,67821,74446,24045,20501,16502,56365,117591,20272,240595,381884,64933,108052,328561,233649,12725,72027,16539,22319,…
GO:0006468	protein phosphorylation	biological_process	5.95e-22	6.91e-20	439	9562	607	17789	674895,244895,27103,18769,106763,17691,17776,110157,20868,13844,83813,100043638,64293,103236,67071,269209,18682,108737,29857,21812,19878,11302,20187,19713,13837,110279,14255,22367,71742,20393,263803,18596,72508,56542,12995,18160,12537,110651,18715,170755,12361,230735,140780,16202,225724,13000,12649,13400,66508,238564,320795,69562,17152,270672,53886,21687,70425,22114,26396,67121,104318,241656,2087…
GO:0007264	small GTPase mediated signal transduction	biological_process	4.65e-21	5.05e-19	227	9562	283	17789	75547,19159,69581,380711,72065,244668,19732,328967,217692,76484,21844,77669,22084,19731,12540,19344,19342,54324,98710,73341,76089,19157,442827,277360,270192,11891,109294,224014,74734,107746,20663,230972,19416,19418,74055,16800,109905,80837,17274,19376,224624,22325,71966,75985,74002,68365,71746,69908,216439,20469,234353,56508,68328,19354,53972,347722,226970,52065,19158,19744,24001,68203,241308,107…
GO:0044765	single-organism transport	biological_process	1.53e-19	1.36e-17	644	9562	953	17789	16509,21968,69048,11444,66226,53319,216810,66712,233726,108043,21928,142681,18196,94229,20526,106039,11447,208890,20911,240776,99738,226844,20530,239606,11808,98682,211480,213332,170756,66733,114644,20844,18436,16492,12289,18399,11988,338370,211798,218035,20497,16649,216441,67739,56543,216227,103098,72472,240638,18438,240332,338365,106957,16504,338337,68526,243755,100502876,52466,59005,12033,1103…
GO:0006811	ion transport	biological_process	3.29e-13	1.73e-11	322	9562	461	17789	241794,240776,99738,20530,58226,11447,208890,14658,108043,142681,94229,16509,69048,11444,16535,14404,18821,20497,216441,12789,56543,20511,52076,11988,338370,114644,11440,213053,18436,16492,12289,211480,66733,110304,236794,243755,268512,100502876,30962,94279,106957,16504,22067,22066,18438,14400,338365,21871,20510,194352,12460,246788,14057,18301,16524,14396,59095,277328,94280,12727,67887,11931,2126…
GO:0006793	phosphorus metabolic process	biological_process	3.89e-13	1.99e-11	650	9562	1009	17789	17434,13839,54128,98267,241656,59027,17152,68961,192656,320139,12323,107589,14917,69635,252864,28042,22084,231637,75669,18212,67763,71091,216166,100043566,78334,50932,11482,18218,216965,628664,93687,18015,13842,104175,20135,59125,12567,69181,17346,75456,218699,223775,19272,214230,99712,19277,67071,64293,100043638,100040244,13844,20868,110157,17691,106763,244895,27103,18769,674895,18596,263803,765…
GO:0006796	phosphate-containing compound metabolic process	biological_process	3.89e-13	1.99e-11	650	9562	1009	17789	192185,26362,16590,12571,13649,15357,269774,208583,11350,59041,240880,23955,24018,225638,26414,19092,665113,19271,19245,14184,20111,319801,116904,225028,19256,20620,19216,140810,266632,56274,17169,18768,235584,18642,66725,18213,110355,18761,19244,12531,27373,11674,74776,382620,18717,14555,59126,19243,105352,329502,18755,13548,12229,14191,67292,18214,544963,67375,19260,13869,19258,13836,211347,125…
GO:0051056	regulation of small GTPase mediated signal transduction	biological_process	4.29e-13	2.16e-11	86	9562	98	17789	236915,545156,50753,13605,442801,232227,57257,213498,207212,74206,16443,110596,52666,69632,72318,213783,56784,269608,20403,14163,223254,230098,228850,241694,232237,102075,26382,17207,215632,13998,211673,245666,227377,110279,74018,223435,54126,56349,268739,72754,219140,99371,19417,328967,16801,213649,244668,380711,75547,19159,109934,21844,77669,22084,381112,217692,224014,109294,277360,19157,54324,…
GO:0019219	regulation of nucleobase-containing compound metabolic process	biological_process	1.18e-12	5.86e-11	695	9562	1090	17789	15214,72504,235907,26896,238722,66500,15206,27386,60611,72139,56296,56484,330301,16391,64290,26380,232853,244713,226641,242747,114713,270004,101604,320995,69601,12916,22697,81703,71131,22751,21386,18736,212569,224598,16658,12609,18021,219150,83557,21676,19415,77117,210719,110805,12399,11819,18143,619310,72128,19664,18997,76199,67486,242705,234725,13711,18508,233490,18027,668620,665913,12912,17128…
GO:0016310	phosphorylation	biological_process	1.48e-12	7e-11	465	9562	701	17789	15257,245650,19766,14773,545929,26416,53416,27373,18752,11674,26559,26411,13548,12229,226751,232533,213452,12305,59126,18755,14772,329421,269275,18595,13869,235344,435766,12545,13836,223255,14254,55980,18214,109880,14191,26399,244418,26407,74178,75770,15162,22241,234878,26404,83560,75607,19094,26563,77976,18712,13549,110542,17164,26415,22165,69171,19877,16590,12571,13649,240505,226419,381390,2697…
GO:0080090	regulation of primary metabolic process	biological_process	4.29e-12	2e-10	713	9562	1126	17789	15206,60611,27386,26896,238722,66500,72504,15214,235907,242747,114713,226641,26380,232853,244713,72139,56484,330301,56296,16391,64290,22697,69601,12916,320995,101604,270004,21386,212569,18736,16658,224598,22751,71131,70419,81703,210719,110805,77117,219150,83557,21676,19415,12609,18021,208691,13711,67486,76199,242705,234725,18143,619310,72128,19664,18997,12399,11819,72154,18023,26423,104394,408067…
GO:0031323	regulation of cellular metabolic process	biological_process	4.55e-12	2.1e-10	721	9562	1140	17789	12916,69601,22697,270004,320995,101604,22751,21386,18736,212569,224598,16658,81703,71131,70419,26896,238722,66500,18938,15206,27386,60611,15214,72504,235907,226641,242747,114713,72139,56296,56484,330301,16391,64290,26380,232853,244713,26423,18023,408067,104394,21385,21678,19414,72154,18508,233490,18027,668620,665913,17128,12912,13813,54352,72720,545471,100503353,17936,544922,378466,107815,70227,5…
GO:0019222	regulation of metabolic process	biological_process	4.63e-12	2.1e-10	732	9562	1159	17789	235907,72504,15214,238722,26896,66500,18938,15206,60611,27386,330301,56484,56296,72139,64290,16391,232853,26380,244713,226641,114713,242747,270004,320995,101604,69601,12916,22697,81703,71131,70419,22751,212569,18736,21386,224598,16658,12609,18021,83557,219150,19415,21676,77117,210719,110805,11819,12399,72128,619310,19664,18143,18997,234725,76199,242705,67486,13711,208691,18508,668620,18027,233490…
GO:0051171	regulation of nitrogen compound metabolic process	biological_process	5.11e-12	2.29e-10	712	9562	1125	17789	270118,68837,68877,56458,232784,192191,241944,234362,116810,330463,211586,107503,245595,13982,630836,22757,108168395,75507,269585,244721,272322,72180,545938,243308,15251,235050,17127,18996,225908,218772,17877,15900,629016,22775,17536,21815,13685,23872,353187,30944,22025,57765,27224,22337,56869,100039060,66849,22754,69234,230700,100043772,15208,30052,11909,109889,384763,319758,66593,108167848,7159…
GO:0006355	regulation of transcription, DNA-dependent	biological_process	8.06e-12	3.48e-10	676	9562	1065	17789	70122,192231,235626,72667,665211,22059,75302,108655,20847,236366,64144,12753,17933,18044,17342,407812,234413,13557,100043468,20467,22758,15229,100416706,210162,22764,66869,57246,23958,12914,328274,12611,22696,192651,233056,75316,81601,229542,232791,75424,18032,12592,18504,17300,102638847,100233208,76373,18510,102637366,67235,66213,244349,675812,18033,23871,100978,20664,17977,109575,56771,56632,10…
GO:2001141	regulation of RNA biosynthetic process	biological_process	8.06e-12	3.48e-10	676	9562	1065	17789	73430,24135,69020,50496,107889,71591,232875,56222,17979,12398,11624,69870,11835,67607,55994,636741,26386,18109,20846,380669,18171,12014,18519,240063,211961,77519,70408,193452,408065,18771,71592,103806,15227,108167848,384763,319758,11909,109889,15208,230700,69234,100043772,22754,100039060,56869,22337,27224,57765,30944,22025,23872,353187,17536,21815,629016,22775,225908,218772,15900,17877,18996,1712…
GO:0051252	regulation of RNA metabolic process	biological_process	8.65e-12	3.68e-10	677	9562	1067	17789	630836,22757,13982,245595,269585,75507,244721,108168395,272322,72180,68877,68837,270118,232784,192191,56458,241944,234362,107503,211586,330463,116810,22025,30944,353187,23872,27224,57765,22337,100039060,56869,235050,15251,243308,545938,18996,17127,15900,218772,17877,225908,21815,17536,22775,629016,70408,18771,408065,193452,240063,18519,77519,211961,12014,18171,380669,69234,230700,100043772,22754,…
GO:0010468	regulation of gene expression	biological_process	9.52e-12	4e-10	689	9562	1088	17789	232878,225998,631624,54650,12394,213389,22691,54446,78284,100216455,79362,237411,11865,381067,19401,67692,18028,60532,14281,74123,216848,71375,13876,17132,66808,54131,18986,104348,19883,432769,19013,18987,54678,228876,12355,17863,213011,235047,547097,435366,77044,620419,104156,228790,238693,19696,235682,240041,17135,100041379,641376,20464,14390,26427,52679,22061,20933,19698,76390,228980,245174,17…
GO:0007265	Ras protein signal transduction	biological_process	1.65e-11	6.76e-10	76	9562	87	17789	269608,20403,52666,69632,72318,213783,110596,213498,207212,16443,442801,232227,57257,13605,236915,545156,50753,268739,219140,72754,99371,54126,56349,110279,227377,223435,74018,211673,245666,102075,17207,26382,215632,13998,232237,14163,223254,230098,19418,230972,235633,20663,54324,73341,224014,109294,277360,19157,381112,109934,77669,21844,19159,75547,328967,16801,19417,213649,24001,102098,234094,1…
GO:0046578	regulation of Ras protein signal transduction	biological_process	1.65e-11	6.76e-10	76	9562	87	17789	54324,73341,109294,224014,19157,277360,19418,235633,20663,230972,75547,19159,328967,19417,16801,213649,381112,77669,21844,109934,226970,53972,102098,24001,73728,19158,234094,71704,71972,380698,107338,622434,22325,16800,30938,74002,243621,234353,110596,207212,213498,16443,269608,20403,52666,72318,213783,69632,13605,50753,545156,236915,442801,57257,232227,54126,56349,110279,227377,223435,74018,2687…
GO:0010556	regulation of macromolecule biosynthetic process	biological_process	2.13e-11	8.43e-10	683	9562	1081	17789	71131,81703,21386,212569,18736,16658,224598,22751,320995,101604,270004,22697,12916,26380,232853,244713,72139,56484,330301,56296,64290,16391,242747,226641,15214,72504,235907,15206,60611,27386,26896,238722,66500,70227,54601,378466,107815,100503353,17936,544922,72720,545471,665913,12912,17128,13813,54352,18508,18027,233490,668620,72154,26423,18023,408067,21385,104394,21678,18143,19664,72128,619310,1…
GO:0031326	regulation of cellular biosynthetic process	biological_process	2.13e-11	8.43e-10	683	9562	1081	17789	69821,320586,50796,330361,12606,94112,72739,619289,16476,18998,224585,19009,13714,15375,217127,381405,231866,321000,116871,15218,232966,211378,15228,240067,240066,378435,22431,78921,380855,14234,243833,14461,223227,80902,622408,449521,72068,269997,67733,18124,12013,12590,12591,667666,17425,18511,22718,21405,26927,74400,13999,100041581,272347,71059,26379,76365,67911,56314,83925,329934,54139,18503,…
GO:2000112	regulation of cellular macromolecule biosynthetic process	biological_process	2.13e-11	8.43e-10	683	9562	1081	17789	382118,18029,57230,223922,170828,112415,73274,20675,216177,57745,18503,17126,67911,56314,54139,83925,329934,26379,76365,71059,272347,100041581,74400,13999,22718,21405,26927,12591,667666,17425,18511,18124,12013,12590,72068,269997,67733,622408,449521,80902,223227,380855,14234,14461,243833,22431,78921,240066,378435,232966,211378,15228,240067,381405,231866,15218,321000,116871,217127,13714,15375,18998…
GO:0009889	regulation of biosynthetic process	biological_process	2.71e-11	1.06e-09	683	9562	1082	17789	242747,226641,232853,26380,244713,56484,330301,56296,72139,16391,64290,15206,27386,60611,238722,26896,66500,235907,72504,15214,212569,18736,21386,16658,224598,22751,71131,81703,22697,12916,101604,320995,270004,13711,208691,234725,67486,76199,242705,19664,72128,619310,18143,18997,11819,12399,210719,110805,77117,83557,219150,21676,12609,18021,17936,100503353,544922,545471,72720,70227,54601,107815,3…
GO:0060255	regulation of macromolecule metabolic process	biological_process	4.14e-11	1.6e-09	704	9562	1120	17789	233893,72807,71640,68703,235028,234358,234959,107932,236193,14815,112694759,29808,29871,327987,18509,56198,69944,22698,65020,14011,14605,18992,78251,380850,21375,24132,20371,71063,21833,243834,431706,22123,69757,272382,12915,382019,20728,240120,210853,17131,11622,21387,52502,434178,101835,170763,102633156,71241,382030,170740,13875,17268,434377,218030,56404,414758,56220,20851,69257,15499,319618,33…
GO:0016070	RNA metabolic process	biological_process	6.91e-10	2.37e-08	855	9562	1396	17789	21385,408067,104394,21399,26423,18023,21678,72154,216119,18508,668620,18027,233490,17128,12912,665913,54352,13813,545471,230577,72720,17936,100503353,544922,26918,107815,378466,70227,54601,20595,77117,210719,110805,28088,12609,212728,67684,18021,83557,219150,21676,234725,67486,76199,242705,13711,98985,12399,11819,619310,72128,19664,18143,18997,12916,192119,66877,22697,270004,101604,320995,66070,2…
GO:0009101	glycoprotein biosynthetic process	biological_process	3.24e-09	1.05e-07	63	9562	73	17789	68273,99011,240119,11870,20014,93961,14348,26878,26877,20440,225742,54613,53625,20445,68292,17308,73379,66435,102637973,241230,272411,20447,17309,20448,20444,235587,20452,14347,54616,20442,329777,320011,72297,20450,50935,108105,328417,103963,20454,20443,97884,232984,14345,20446,11872,26879,20449,14043,11545,380959,14042,171167,20441,13200,26938,56219,73068,58193,20451,97440,117592,16430,217734
GO:0055085	transmembrane transport	biological_process	5.4e-09	1.65e-07	325	9562	492	17789	20522,102443351,30791,109108,235504,64454,140494,11950,66169,98741,50934,16494,224674,80879,229699,71781,94282,56325,234076,207565,20269,236727,213006,641376,16511,140919,228139,64177,59049,110877,22063,18669,228993,226922,22065,56843,74087,55961,26946,20544,67498,104681,22068,16510,20502,20525,329954,74610,20541,110876,68294,224022,20518,69572,330836,97086,225997,20274,20265,243753,30805,30952,1…
GO:0006351	transcription, DNA-dependent	biological_process	6.68e-09	2.01e-07	719	9562	1170	17789	100216455,78284,54446,79362,631624,225998,232878,22691,12394,213389,54650,18028,67692,19401,15438,14281,237411,11865,381067,17132,104348,66808,54131,18986,71375,216848,74123,13876,77044,435366,620419,547097,235047,19696,66526,228790,238693,104156,19013,432769,19883,17863,213011,18987,54678,228876,12355,14390,20464,641376,26427,99730,235682,100041379,240041,17135,245174,17129,20933,22061,52679,228…
GO:0032774	RNA biosynthetic process	biological_process	7.02e-09	2.09e-07	720	9562	1172	17789	24135,73430,69020,50496,107889,71591,56222,232875,17979,12398,69870,11624,67607,11835,636741,55994,26386,18109,72568,20846,380669,12014,18171,240063,18519,77519,211961,70408,408065,18771,193452,15227,103806,71592,108167848,384763,319758,109889,11909,15208,230700,69234,100043772,22754,100039060,407786,56869,22337,27224,57765,22025,30944,218832,353187,23872,17536,21815,629016,22775,218772,15900,178…
GO:0007266	Rho protein signal transduction	biological_process	8.3e-09	2.39e-07	61	9562	71	17789	20663,235633,20403,230972,19418,269608,69632,213783,52666,110596,54324,73341,16443,277360,207212,109294,224014,213498,381112,77669,21844,57257,109934,442801,75547,13605,545156,328967,236915,213649,16801,19417,72754,234094,219140,102098,268739,24001,71972,380698,71704,56349,54126,53972,74018,223435,227377,226970,110279,13998,17207,26382,102075,30938,16800,622434,22325,232237,230098,223254,14163
GO:0035023	regulation of Rho protein signal transduction	biological_process	8.3e-09	2.39e-07	61	9562	71	17789	16800,30938,622434,232237,22325,230098,223254,14163,13998,26382,102075,17207,56349,54126,53972,74018,223435,227377,226970,110279,72754,219140,234094,102098,268739,24001,71704,71972,380698,75547,13605,545156,328967,236915,16801,19417,213649,381112,57257,77669,21844,109934,442801,110596,73341,54324,16443,277360,109294,207212,213498,224014,235633,20663,20403,230972,19418,269608,69632,213783,52666
GO:0007166	cell surface receptor signaling pathway	biological_process	8.99e-09	2.56e-07	623	9562	1004	17789	620672,16001,330485,13866,14369,58182,56811,107831,19065,320127,11549,252907,171203,22095,81010,246313,12402,353344,666002,50781,627569,100042848,74191,242425,207911,235712,107221,100312477,13491,14672,620928,81014,22354,14682,171240,239336,13841,627743,14685,233222,171244,113847,17203,628946,171187,18197,15552,16449,434701,108072,216749,171199,171230,170757,53883,625823,22417,15465,171185,20394,…
GO:0009100	glycoprotein metabolic process	biological_process	1.04e-08	2.93e-07	63	9562	74	17789	241230,272411,17309,20447,14347,20444,20448,20452,235587,320011,72297,329777,54616,20442,20450,50935,108105,68273,99011,240119,11870,26878,93961,14348,20014,225742,54613,53625,26877,20440,17308,73379,66435,102637973,20445,68292,380959,14042,11545,20441,13200,171167,20451,56219,26938,58193,73068,217734,117592,97440,16430,20454,328417,103963,232984,14345,20443,97884,26879,11872,20446,20449,14043
GO:0009966	regulation of signal transduction	biological_process	1.36e-08	3.75e-07	112	9562	147	17789	19229,52666,213783,72318,69632,56784,269608,66508,68010,20403,213498,74206,54409,207212,50781,16443,110596,442801,232227,67154,57257,236915,56692,50753,545156,13605,56089,66849,14525,56811,268739,219140,72754,99371,110279,227377,223435,74018,54126,66743,71609,56349,102075,17207,26382,114715,215632,13998,211673,245666,215748,245684,14163,73284,223254,228850,230098,241694,232237,19418,51801,230972,…
GO:0010646	regulation of cell communication	biological_process	1.36e-08	3.75e-07	112	9562	147	17789	442801,67154,232227,57257,236915,56692,50753,545156,13605,56089,66849,52666,19229,213783,72318,69632,269608,56784,68010,66508,20403,213498,74206,207212,54409,50781,16443,110596,26382,17207,102075,114715,215632,13998,211673,245666,215748,14163,245684,223254,73284,230098,228850,241694,232237,14525,268739,56811,219140,72754,99371,110279,227377,74018,223435,66743,54126,71609,56349,109934,22084,77669,…
GO:0023051	regulation of signaling	biological_process	2.64e-08	7.15e-07	112	9562	148	17789	381112,24066,170770,217692,109934,77669,22084,21844,244668,380711,75547,19159,213649,328967,19417,16801,51801,19418,230972,235633,20663,73341,54324,99326,224014,109294,277360,19157,234353,20469,14083,22325,622434,30938,16800,74002,13877,243621,24001,102098,234094,19158,73728,71704,71972,380698,107338,114716,74747,226970,70419,53972,13380,442801,67154,232227,57257,13605,56089,66849,56692,236915,54…
GO:0006486	protein glycosylation	biological_process	3.49e-08	9.26e-07	58	9562	68	17789	68292,20445,73379,66435,102637973,17308,20440,26877,53625,54613,225742,93961,20014,14348,26878,240119,11870,68273,99011,108105,50935,20450,20442,329777,320011,72297,235587,20452,20448,20444,14347,17309,20447,272411,241230,20449,20446,11872,26879,97884,20443,14345,232984,103963,328417,20454,16430,97440,117592,217734,73068,26938,20451,171167,13200,20441,11545,380959
GO:0043413	macromolecule glycosylation	biological_process	3.49e-08	9.26e-07	58	9562	68	17789	20444,20448,235587,20452,14347,241230,272411,20447,17309,50935,20450,108105,329777,20442,320011,72297,20014,93961,14348,26878,68273,99011,11870,240119,20445,68292,17308,73379,66435,102637973,26877,20440,225742,53625,54613,171167,20441,13200,11545,380959,97440,117592,16430,217734,26938,73068,20451,20443,97884,232984,14345,328417,103963,20454,20449,20446,11872,26879
GO:0070085	glycosylation	biological_process	3.49e-08	9.26e-07	58	9562	68	17789	329777,20442,320011,72297,108105,20450,50935,20447,17309,272411,241230,20452,235587,20444,20448,14347,20440,26877,54613,53625,225742,68292,20445,102637973,73379,66435,17308,11870,240119,99011,68273,14348,93961,20014,26878,73068,26938,20451,16430,117592,97440,217734,11545,380959,171167,20441,13200,20446,11872,26879,20449,103963,328417,20454,97884,20443,14345,232984
GO:0048583	regulation of response to stimulus	biological_process	5.85e-08	1.54e-06	117	9562	157	17789	219140,72754,99371,56811,268739,14525,71609,56349,66743,54126,74018,223435,227377,110279,230784,75747,211673,245666,215632,13998,17207,26382,102075,140742,114715,241694,232237,73284,223254,230098,228850,215748,14163,245684,20403,56784,269608,66508,68010,72318,213783,69632,19229,52666,110596,16443,213498,54409,74206,50781,207212,67154,232227,57257,442801,66849,56089,13605,236915,56692,545156,50753…
GO:0016337	cell-cell adhesion	biological_process	3.33e-07	8.37e-06	101	9562	135	17789	93889,320873,12941,233651,12554,215654,12937,14107,329628,192163,18526,23836,12562,270120,245578,93890,241201,53883,93699,192164,93711,12558,12555,93893,211924,12561,93892,12614,93709,93708,12563,93885,93712,13507,279653,13511,192161,12552,93877,53601,93700,93724,93715,93705,69398,75599,54216,353234,239096,93701,353237,93702,93874,170677,93717,353236,11994,13505,93710,13510,93882,12942,93707,1040…
GO:0016192	vesicle-mediated transport	biological_process	3.33e-07	8.37e-06	90	9562	118	17789	238123,106489,20336,11765,17294,76983,100226,217517,60409,58244,75914,53611,11776,218811,18197,74325,74463,233405,66964,226744,20288,13852,68338,22318,12847,229593,11771,20912,105504,56389,260302,67727,66629,211446,53330,108735,74105,228960,73122,59005,77573,74732,56041,11766,53413,56418,211556,70349,11764,108011,22319,20333,68566,20909,74190,102339,53612,71770,218035,20334,22317,66147,69596,5621…
GO:0007155	cell adhesion	biological_process	4.66e-07	1.14e-05	138	9562	194	17789	12560,93878,12557,21825,18530,22295,107934,12564,12386,93875,13512,12939,12504,116731,93714,100534287,12950,17123,11994,13505,93717,93874,93702,22329,353237,15891,208777,353234,239096,75599,65945,93888,93716,93703,93722,73173,93723,67666,12936,104010,93882,93885,12563,93709,12481,11595,22330,12555,93705,93700,93724,53601,12552,13511,279653,13003,14107,12819,330790,12941,233651,320873,12505,70549,…
GO:0022610	biological adhesion	biological_process	4.66e-07	1.14e-05	138	9562	194	17789	114332,329628,192163,23836,18526,270120,12562,245578,93889,70549,12505,320873,12941,233651,330790,12819,14107,13003,279653,13511,12552,53601,93700,93724,93705,12555,22330,11595,12481,93709,12563,93885,93882,104010,12936,93723,67666,73173,93722,93703,93716,93888,65945,75599,353234,239096,208777,15891,353237,22329,93702,93874,93717,13505,11994,17123,12950,93714,100534287,116731,12504,12939,13512,93…
GO:0007156	homophilic cell adhesion	biological_process	4.67e-07	1.14e-05	100	9562	134	17789	12550,93888,65945,93716,93703,93704,73173,64085,93722,19713,12936,93723,93707,12942,104010,13510,93710,93882,353236,93717,11994,13505,170677,93874,93702,93701,353237,75599,353234,239096,54216,13512,93875,93887,12939,211712,116731,93714,100534287,12556,219228,232370,12560,93713,219257,93706,93878,12557,18530,22295,107934,245827,13506,353235,12564,12558,192164,93699,93711,53883,93890,241201,270120,…
GO:0030001	metal ion transport	biological_process	1.01e-06	2.38e-05	85	9562	112	17789	16518,16514,20277,16516,76273,106957,11933,20273,67821,72413,30791,68427,20529,227632,227059,20276,74252,72002,20272,16521,243755,100502876,98741,67887,14977,11931,11979,214112,20271,16500,24046,20500,20269,16531,11977,11932,12460,233280,70701,84036,16439,328133,20191,106947,16524,20278,11419,20192,53945,16513,55961,16517,16438,65113,69806,18821,12295,20530,237831,240776,214922,16523,74552,140493…
GO:0051259	protein oligomerization	biological_process	1.74e-06	4.08e-05	56	9562	69	17789	16490,98741,212919,622320,16502,111368,383348,99738,241794,233107,69259,240595,226025,74343,216858,268345,382056,67498,21927,70382,22059,207474,225030,67516,19122,240444,26434,106931,70461,243043,16538,16491,233529,382571,16508,56543,71393,328424,66733,16539,72565,16500,16506,225997,17364,58800,16494,22061,239217,22062,330171,105440,72844,51960,226823,16492
GO:0006836	neurotransmitter transport	biological_process	4.03e-06	9.11e-05	24	9562	25	17789	2.25644e+130
GO:0006629	lipid metabolic process	biological_process	4.14e-06	9.22e-05	132	9562	189	17789	233537,78928,52858,433091,330217,74121,241274,56075,100705,11430,14466,76267,320951,233552,269060,66190,114663,628236,71365,18720,381334,269437,14593,13481,208715,97212,228151,241062,14755,93732,66234,12642,18803,381236,53897,18717,15494,329502,14420,67452,235293,18802,117150,76943,15496,19156,15492,171168,67292,55980,212862,619326,80911,56209,108657,78390,18796,100163,75847,219024,101502,70059,7…
GO:0070647	protein modification by small protein conjugation or removal	biological_process	4.23e-06	9.36e-05	62	9562	79	17789	22217,71472,28000,63958,170707,30940,227334,72607,76179,112694759,72106,72137,77593,329908,22258,17847,74996,22200,53376,244144,76302,22284,24110,19647,207304,22224,225164,235441,74270,74112,66743,67588,319651,216835,54651,224836,140629,30941,59025,14479,83563,75763,252870,69727,99526,15204,140630,100756,57775,170822,84092,72344,381944,216825,78787,75083,74256,237898,56424,13531,236733,235323
GO:0090304	nucleic acid metabolic process	biological_process	6.37e-06	0.00013839	969	9562	1647	17789	20933,22061,52679,52040,228980,19698,76390,245174,101122,17129,54561,108138,235682,66161,100041379,17135,240041,14390,20464,52864,641376,26427,74253,99730,78903,53417,215031,68205,238690,77110,15260,71508,668039,77652,20586,80905,17217,24014,21374,240690,432770,19365,73569,20226,69930,381314,64379,22700,30947,237339,74670,243905,73473,14088,232430,22750,22640,218314,56525,237775,69228,11865,23741…
GO:0015698	inorganic anion transport	biological_process	8.24e-06	0.00017337	29	9562	32	17789	1.27271e+154
GO:0051260	protein homooligomerization	biological_process	8.53e-06	0.00017718	48	9562	59	17789	19122,67516,207474,225030,70382,21927,67498,268345,382056,216858,240595,74343,233107,69259,241794,16502,111368,99738,383348,622320,16490,98741,212919,16492,72844,51960,226823,330171,105440,239217,16494,16500,16506,66733,16539,328424,71393,56543,382571,233529,16508,16491,243043,16538,26434,106931,70461,240444
GO:0007267	cell-cell signaling	biological_process	1.94e-05	0.00037573	35	9562	41	17789	1.33801e+177
GO:0016311	dephosphorylation	biological_process	2.83e-05	0.00053516	77	9562	105	17789	234129,19243,105352,19253,70419,19246,70686,320139,19267,19263,240672,66461,218232,19262,66959,19281,67603,19283,19248,19280,12531,19244,67446,218294,19211,56294,13853,75219,240892,19272,63953,219024,237860,19273,24000,19260,19268,252864,231637,12530,56291,68440,18218,435391,19258,76571,15170,19250,13537,19266,19249,24018,19252,19279,19277,245857,100040244,545902,19274,210762,19247,104831,19259,2…
GO:0006470	protein dephosphorylation	biological_process	3.07e-05	0.00057669	75	9562	102	17789	231637,19268,252864,19260,24000,18218,435391,19258,68440,56291,12530,75219,56294,13853,218294,19211,19272,240892,237860,63953,19273,19244,12531,19283,19280,19248,67446,19253,19243,105352,234129,67603,218232,66461,19262,66959,19281,320139,70686,19267,19263,240672,70419,19246,319520,80915,19245,19271,56405,19255,66849,19256,72349,19259,104831,19247,235584,545622,382030,229776,72102,100040244,19279,…
GO:0006461	protein complex assembly	biological_process	6.15e-05	0.0011292	93	9562	132	17789	233276,69259,99571,240595,12344,74343,111368,16502,622320,93689,98741,67516,19122,22059,110135,216858,268345,230249,382056,56378,18197,16491,382571,16508,12345,243043,26886,16538,240444,106931,100503890,70461,212514,105440,219072,72844,66311,66296,58800,16494,22061,239217,14083,21916,16500,259279,17364,71393,66998,328424,233107,226025,68493,50876,383348,99738,241794,74237,74192,19229,12343,16490,…
GO:0070271	protein complex biogenesis	biological_process	6.15e-05	0.0011292	93	9562	132	17789	21927,67498,207474,225030,70382,68089,18196,16490,212919,67048,12343,74192,19229,74237,241794,50876,383348,99738,226025,68493,233107,50875,68566,211556,16506,225997,66733,72565,16539,328580,22062,226823,51960,16492,330171,66995,26434,51885,12340,67771,233529,20892,56543,230249,268345,56378,382056,216858,22059,110135,19122,67516,98741,93689,622320,111368,16502,240595,12344,74343,233276,99571,69259…
GO:0014070	response to organic cyclic compound	biological_process	6.78e-05	0.0012337	47	9562	60	17789	18440,228139,23958,641376,15378,19016,225998,20181,18667,21833,207565,18439,94045,13982,110784,217166,19401,11614,26423,18171,18436,18124,22026,14536,13864,14815,381463,20182,21907,19411,11835,26380,218772,26424,11819,353187,13983,22025,26381,18438,22337,12355,26379,21834,18227,19883,19013
GO:0006152	purine nucleoside catabolic process	biological_process	8.9e-05	0.0014749	15	9562	15	17789	6.96012e+81
GO:0006184	GTP catabolic process	biological_process	8.9e-05	0.0014749	15	9562	15	17789	6.96012e+81
GO:0009143	nucleoside triphosphate catabolic process	biological_process	8.9e-05	0.0014749	15	9562	15	17789	1.94147e+81
GO:0009146	purine nucleoside triphosphate catabolic process	biological_process	8.9e-05	0.0014749	15	9562	15	17789	5.41532e+81
GO:0009154	purine ribonucleotide catabolic process	biological_process	8.9e-05	0.0014749	15	9562	15	17789	5.41532e+81
GO:0009164	nucleoside catabolic process	biological_process	8.9e-05	0.0014749	15	9562	15	17789	6.66912e+81
GO:0009203	ribonucleoside triphosphate catabolic process	biological_process	8.9e-05	0.0014749	15	9562	15	17789	1.94147e+81
GO:0009207	purine ribonucleoside triphosphate catabolic process	biological_process	8.9e-05	0.0014749	15	9562	15	17789	1.80152e+81
GO:0009261	ribonucleotide catabolic process	biological_process	8.9e-05	0.0014749	15	9562	15	17789	4.04711e+81
GO:0033124	regulation of GTP catabolic process	biological_process	8.9e-05	0.0014749	15	9562	15	17789	5.41532e+81
GO:0042454	ribonucleoside catabolic process	biological_process	8.9e-05	0.0014749	15	9562	15	17789	1.94157e+81
GO:0043087	regulation of GTPase activity	biological_process	8.9e-05	0.0014749	15	9562	15	17789	1.94157e+81
GO:0046130	purine ribonucleoside catabolic process	biological_process	8.9e-05	0.0014749	15	9562	15	17789	6.66912e+81
GO:1901069	guanosine-containing compound catabolic process	biological_process	8.9e-05	0.0014749	15	9562	15	17789	6.96012e+81
GO:1901658	glycosyl compound catabolic process	biological_process	8.9e-05	0.0014749	15	9562	15	17789	3.20484e+81
GO:0006820	anion transport	biological_process	0.00010848	0.001781	57	9562	76	17789	26570,12725,70456,245128,140475,12724,232156,231583,12727,242607,12728,11732,330836,224022,320718,11987,59033,20511,218756,11988,20539,55963,20510,20514,171429,19743,12723,224661,20505,216441,106073,56315,241919,74087,70784,26372,13521,13487,20515,94229,142681,240215,268512,23985,58176,208890,55951,30962,50934,56365,20533,20516,54403,80979,26373,20536,20512
GO:0007186	G-protein coupled receptor signaling pathway	biological_process	0.0001085	0.001781	538	9562	900	17789	627479,113858,320795,14652,171259,22301,100312473,100312484,100129,58245,14673,11551,227326,68039,12273,11517,14715,383258,240239,12776,107515,632671,238377,171193,113848,12145,14760,12209,100042591,14608,13618,21336,171272,11536,51801,14706,64378,171258,241263,637908,319293,15558,628422,15557,14704,330814,11542,171195,14761,80901,668727,637004,669149,14763,12771,110524,108073,171241,627111,20605…
GO:0009894	regulation of catabolic process	biological_process	0.0001288	0.0020938	21	9562	23	17789	5.44963e+116
GO:0016055	Wnt receptor signaling pathway	biological_process	0.000145	0.0023346	26	9562	30	17789	2.24152e+130
GO:0016579	protein deubiquitination	biological_process	0.00020409	0.0032092	46	9562	60	17789	74270,74112,235441,22224,24110,22284,244144,53376,74996,17847,22258,329908,77593,112694759,76179,72607,227334,30940,170707,71472,22217,235323,236733,13531,75083,237898,74256,78787,381944,216825,72344,84092,57775,170822,100756,99526,69727,252870,83563,14479,59025,30941,224836,54651,216835,319651
GO:0070646	protein modification by small protein removal	biological_process	0.00020409	0.0032092	46	9562	60	17789	22224,235441,74270,74112,22284,24110,53376,244144,17847,22258,74996,329908,112694759,77593,227334,72607,76179,22217,71472,170707,30940,235323,13531,236733,381944,216825,78787,75083,237898,74256,100756,57775,170822,84092,72344,69727,99526,59025,30941,83563,14479,252870,224836,319651,216835,54651
GO:0031329	regulation of cellular catabolic process	biological_process	0.00022003	0.0034437	20	9562	22	17789	1.00505e+111
GO:0042221	response to chemical stimulus	biological_process	0.00030447	0.0047214	66	9562	92	17789	330485,75747,230784,225998,20181,19016,18667,13982,94045,140742,110784,217166,19401,11614,26423,17128,18436,22026,381463,66508,17127,68010,19411,58245,218772,11819,353187,13983,22025,22337,12355,19883,19013,14683,228139,18440,23958,641376,15378,21833,207565,18439,17129,17131,17125,18171,18124,70433,14536,13864,14815,77996,21907,20182,55994,11835,26380,26424,17126,26381,18438,21452,26379,67473,218…
GO:0010033	response to organic substance	biological_process	0.00032388	0.0049766	59	9562	81	17789	26381,18438,353187,13983,22025,17126,19883,19013,12355,22337,26379,18227,21834,68010,21907,66508,17127,20182,19411,55994,14815,381463,26424,11819,11835,26380,58245,218772,19401,17125,11614,26423,94045,18439,17129,110784,13982,217166,17131,18124,22026,13864,14536,18171,17128,18436,23958,641376,14683,228139,330485,18440,20181,225998,19016,21833,18667,207565,15378
GO:0009719	response to endogenous stimulus	biological_process	0.00035354	0.0054076	57	9562	78	17789	13982,94045,18439,17129,110784,217166,17131,19401,11614,17125,26423,18171,17128,18436,18124,22026,14536,13864,14683,228139,18440,23958,641376,15378,20181,225998,19016,207565,21833,18667,353187,13983,22025,17126,26381,18438,22337,12355,26379,21834,18227,19883,19013,14815,381463,66508,68010,20182,21907,17127,19411,55994,11835,26380,218772,26424,11819
GO:0006140	regulation of nucleotide metabolic process	biological_process	0.00040251	0.0059668	16	9562	17	17789	1.14713e+86
GO:0006195	purine nucleotide catabolic process	biological_process	0.00040251	0.0059668	16	9562	17	17789	1.94155e+86
GO:0009118	regulation of nucleoside metabolic process	biological_process	0.00040251	0.0059668	16	9562	17	17789	6.96012e+86
GO:0030811	regulation of nucleotide catabolic process	biological_process	0.00040251	0.0059668	16	9562	17	17789	1.94152e+86
GO:0033121	regulation of purine nucleotide catabolic process	biological_process	0.00040251	0.0059668	16	9562	17	17789	1.19837e+86
GO:0072523	purine-containing compound catabolic process	biological_process	0.00040251	0.0059668	16	9562	17	17789	2.98757e+86
GO:1900542	regulation of purine nucleotide metabolic process	biological_process	0.00040251	0.0059668	16	9562	17	17789	1.94152e+86
GO:1901362	organic cyclic compound biosynthetic process	biological_process	0.00040718	0.0060095	815	9562	1404	17789	636741,55994,26386,18109,20846,72568,69870,11624,67607,11835,71591,232875,56222,17979,12398,24135,73430,55936,69020,50496,665563,13806,107889,109889,11909,11514,432530,15208,230700,69234,100043772,22754,71592,103806,15227,226265,108167848,15496,319758,384763,18519,240063,211961,77519,70408,193452,408065,18771,380669,15494,12014,18171,18996,17127,235050,545938,243308,15251,67072,21815,17536,22775,…
GO:0018130	heterocycle biosynthetic process	biological_process	0.00042387	0.0062285	807	9562	1390	17789	21677,22704,231991,240038,230162,72723,99334,269870,16477,66467,58202,18991,17301,209446,20893,73233,12892,22026,22062,21426,15405,20850,433586,13555,18988,74414,110784,14282,21343,327963,233168,23856,105859,17768,14241,19411,19725,100043034,381463,14233,239652,13712,385674,14236,18160,408068,74120,73229,18507,76022,13983,114142,102639598,626391,64424,14917,71163,22746,15378,22717,14235,245109,18…
GO:0033993	response to lipid	biological_process	0.00047037	0.0067067	40	9562	52	17789	###############################################################################################################################################################################################################################################################
GO:0043401	steroid hormone mediated signaling pathway	biological_process	0.00047037	0.0067067	40	9562	52	17789	###############################################################################################################################################################################################################################################################
GO:0048545	response to steroid hormone stimulus	biological_process	0.00047037	0.0067067	40	9562	52	17789	###############################################################################################################################################################################################################################################################
GO:0071383	cellular response to steroid hormone stimulus	biological_process	0.00047037	0.0067067	40	9562	52	17789	###############################################################################################################################################################################################################################################################
GO:0071396	cellular response to lipid	biological_process	0.00047037	0.0067067	40	9562	52	17789	###############################################################################################################################################################################################################################################################
GO:0071407	cellular response to organic cyclic compound	biological_process	0.00047037	0.0067067	40	9562	52	17789	###############################################################################################################################################################################################################################################################
GO:0034654	nucleobase-containing compound biosynthetic process	biological_process	0.00065772	0.0092156	792	9562	1367	17789	17537,18227,21834,271639,17133,11566,100039706,68087,74352,212281,436240,22433,53970,229663,192657,408062,26381,73181,17932,14238,26424,320858,332221,666311,27049,22678,21380,100316903,15500,73729,210583,13713,11513,242620,57782,74149,210105,16364,50773,17125,214669,245572,14534,17975,26939,19697,103537,93681,19076,100043381,77200,21781,59057,381379,108961,20375,226182,69504,54169,218311,16918,18…
GO:0019438	aromatic compound biosynthetic process	biological_process	0.00066002	0.0092156	802	9562	1385	17789	21676,83557,219150,18021,56421,12609,110805,210719,77117,18997,619310,72128,19664,18143,11819,12399,67054,13711,234725,242705,76199,67486,54352,13813,17128,12912,665913,668620,233490,18027,18508,72154,21678,21385,408067,104394,26423,18023,21399,54601,70227,107815,378466,544922,17936,100503353,108147,545471,72720,235907,72504,14918,15214,73707,27386,60611,15206,66500,54195,238722,26896,244713,6924…
GO:0032011	ARF protein signal transduction	biological_process	0.00070892	0.0096972	15	9562	16	17789	7.40022e+81
GO:0032012	regulation of ARF protein signal transduction	biological_process	0.00070892	0.0096972	15	9562	16	17789	2.34353e+81
GO:0007167	enzyme linked receptor protein signaling pathway	biological_process	0.00072914	0.0099335	27	9562	33	17789	1.38442e+136
GO:0040007	growth	biological_process	0.00098813	0.0133	38	9562	50	17789	###############################################################################################################################################################################################################################################################
GO:0006644	phospholipid metabolic process	biological_process	0.0010398	0.013941	36	9562	47	17789	###############################################################################################################################################################################################################################################################
GO:0008272	sulfate transport	biological_process	0.0010789	0.014182	11	9562	11	17789	2.24662e+61
GO:0072348	sulfur compound transport	biological_process	0.0010789	0.014182	11	9562	11	17789	1.7143e+61
GO:0044255	cellular lipid metabolic process	biological_process	0.0015357	0.0195	70	9562	102	17789	14755,241062,232889,208715,13481,14593,381334,271844,97212,66190,102238433,18700,18720,114663,71365,107476,11430,27388,100705,320951,14466,319660,108083,330217,52858,56075,74121,230379,78928,75847,100041596,23827,219024,67556,99712,78390,338521,545276,18719,15360,108657,67292,28042,242291,230801,80911,230101,55980,212862,619597,117150,171168,14420,329502,18711,235293,18717,27392,53897,71780,19210…
GO:0006650	glycerophospholipid metabolic process	biological_process	0.0017347	0.021781	25	9562	31	17789	1.47551e+132
GO:0046486	glycerolipid metabolic process	biological_process	0.0017347	0.021781	25	9562	31	17789	7.89283e+132
GO:0046483	heterocycle metabolic process	biological_process	0.0017971	0.02248	1098	9562	1930	17789	13813,12912,17128,18508,216119,72154,21678,408067,18023,21399,70227,72774,107815,26918,17936,108147,545471,230577,83557,219150,18021,28088,19374,210719,20595,19664,619310,72962,11819,242705,270004,22697,17687,66877,69601,12916,192119,19718,81703,224598,16658,18736,21386,11966,22751,235907,14918,15214,73707,60611,66500,54195,238722,26896,232853,79459,64290,70616,56484,330301,72139,114713,226641,22…
GO:1901360	organic cyclic compound metabolic process	biological_process	0.0018045	0.022489	1109	9562	1950	17789	19359,70120,100041581,71059,26927,171506,15492,74400,18511,17425,117903916,67733,72068,217038,12590,12013,54364,223922,57230,66628,382118,15417,20675,170828,22427,17126,66336,67375,18503,57745,211347,26379,54139,217127,116871,231866,381405,12909,107045,211651,619289,72739,94112,224585,69821,67967,330361,50796,27015,449521,622408,24074,18642,80902,78921,380855,240067,15228,232966,237336,78929,1172…
GO:0065003	macromolecular complex assembly	biological_process	0.0018531	0.022925	117	9562	181	17789	56086,19122,67516,110135,22059,15441,66336,382056,56378,268345,230249,216858,74343,12344,240595,69259,99571,233276,111368,16502,622320,98741,93689,72844,66296,72480,66311,219072,67733,105440,239217,22061,16494,58800,53605,17364,259279,16500,21916,14083,328424,75678,71393,66998,14958,241732,18197,171506,54561,16508,382571,66978,243529,16491,26886,243043,16538,12345,70461,100503890,212514,106931,58…
GO:0007205	protein kinase C-activating G-protein coupled receptor signaling pathway	biological_process	0.0019924	0.024379	10	9562	10	17789	1.10197e+57
GO:0071495	cellular response to endogenous stimulus	biological_process	0.0025025	0.030291	49	9562	69	17789	26423,17125,19401,11614,17131,217166,13982,17129,110784,13864,14536,18124,22026,17128,18171,641376,23958,21833,18667,225998,19016,20181,15378,26381,17126,22025,13983,353187,19013,19883,21834,18227,26379,22337,12355,55994,19411,21907,68010,66508,20182,17127,381463,14815,11819,26424,218772,26380,11835
GO:0006643	membrane lipid metabolic process	biological_process	0.0026046	0.031414	22	9562	27	17789	1.87007e+123
GO:0006725	cellular aromatic compound metabolic process	biological_process	0.0030312	0.03617	1094	9562	1929	17789	69020,226525,55936,73430,24135,665563,50496,56222,110208,71591,69305,12398,17979,67607,237911,11624,26386,20846,380669,66902,18171,77519,211961,18519,21744,108167848,15227,103806,71592,319758,56417,15208,22754,230700,100043772,56869,22337,23874,30944,17536,67072,218772,225908,15368,17127,192196,67053,18996,15251,545938,235050,72180,56210,75507,269585,244721,108168395,109245,12190,13982,630836,233…
GO:0009755	hormone-mediated signaling pathway	biological_process	0.0030478	0.03624	40	9562	55	17789	###############################################################################################################################################################################################################################################################
GO:0006139	nucleobase-containing compound metabolic process	biological_process	0.0033053	0.039164	1078	9562	1901	17789	102637366,67235,11676,234723,18510,26447,66213,14751,244349,52504,56771,109575,20664,106344,101185,100978,239364,100043042,21388,19014,71941,22375,433791,21384,15547,71567,14463,74570,22688,327992,21679,70122,192231,235626,56086,236366,102436,75302,213109,15427,665211,234413,100043468,244141,17933,18044,100416706,75570,217708,20467,243529,22696,192651,22764,12611,12914,20017,75316,57441,70767,125…
GO:0009725	response to hormone stimulus	biological_process	0.0037922	0.0442	41	9562	57	17789	###############################################################################################################################################################################################################################################################
GO:0007169	transmembrane receptor protein tyrosine kinase signaling pathway	biological_process	0.0038415	0.044574	19	9562	23	17789	2.7019e+96
GO:1901136	carbohydrate derivative catabolic process	biological_process	0.0039789	0.04541	21	9562	26	17789	3.33434e+113
GO:0046488	phosphatidylinositol metabolic process	biological_process	0.003981	0.04541	23	9562	29	17789	7.89286e+122
GO:0070887	cellular response to chemical stimulus	biological_process	0.0040159	0.0455	49	9562	70	17789	55994,19411,68010,66508,21907,20182,17127,14815,381463,26424,11819,218772,11835,26380,26381,22025,17126,353187,13983,19013,19883,21834,18227,12355,22337,26379,23958,641376,18667,21833,19016,225998,20181,15378,19401,11614,17125,26423,217166,17131,17129,110784,13982,13864,14536,18124,22026,18171,17128
GO:0071310	cellular response to organic substance	biological_process	0.0040159	0.0455	49	9562	70	17789	11819,26424,218772,26380,11835,19411,55994,68010,17127,66508,21907,20182,381463,14815,19013,19883,18227,21834,26379,22337,12355,26381,17126,22025,13983,353187,18667,21833,225998,19016,20181,15378,23958,641376,13864,14536,18124,22026,18171,17128,26423,17125,19401,11614,17131,217166,17129,110784,13982
GO:0044723	single-organism carbohydrate metabolic process	biological_process	0.0040314	0.045522	90	9562	138	17789	20444,20448,235587,110208,241230,272411,20447,20450,329777,433182,13806,20014,14348,18419,26878,68273,99011,79459,17308,73379,66435,26877,20440,225742,53625,170768,13200,20441,11545,18640,380959,11674,117592,97440,71780,73068,20451,628870,97884,232984,20454,20449,226265,11872,26879,270198,74551,20452,14347,17309,50935,108105,56421,20442,73744,320011,72297,93961,14751,140481,69064,11870,240119,204…
GO:0016020	membrane	cellular_component	7.2e-49	8.07e-46	1872	9562	2828	17789	99011,626397,381217,98741,78560,545874,100036518,20276,66169,192161,72022,432555,93690,14406,665255,70638,109108,11936,19146,11933,20522,18216,68498,93893,100039796,12426,13617,14594,16511,619597,12777,223696,233280,211612,627626,207565,20269,12493,114716,14811,628580,22307,331524,72084,104245,12554,11826,71027,16494,13492,68294,319430,100312485,211712,20502,94212,54376,384221,214968,235300,67217…
GO:0016021	integral to membrane	cellular_component	2.79e-24	4.27e-22	1090	9562	1669	17789	242653,12267,64051,626828,260297,109246,224079,233919,672125,66190,171238,214597,12773,58250,243628,140493,72023,11553,113864,19204,56418,171270,433070,15564,230810,11732,11548,243764,78928,212073,21337,27061,22313,619294,171278,171200,435975,665119,330189,64540,24060,234847,666085,16518,435529,67821,171189,12802,117591,381884,20501,74090,24045,67260,15466,106722,244745,30044,432735,235854,73102,…
GO:0031224	intrinsic to membrane	cellular_component	3.71e-24	5.2e-22	1093	9562	1675	17789	99887,21336,109254,231474,56199,497097,66844,14559,105243,14608,100042591,67125,71914,12296,12209,20928,107515,18400,271036,113848,238377,171193,11517,100534273,212980,140723,546519,240239,109225,66253,227326,12273,171259,14664,27027,54403,69129,56017,20517,14652,16450,242126,76306,229801,66859,67226,171228,76867,60361,14758,27421,20605,170829,60363,105180375,171241,241556,637004,73658,12771,2405…
GO:0044425	membrane part	cellular_component	3.23e-17	2.09e-15	1180	9562	1883	17789	21338,636731,171237,381853,404287,329872,233080,229658,624845,14708,83770,67843,20519,22297,70423,171262,67815,18671,171264,94226,68465,22232,16523,14755,381038,384534,54409,14385,26361,75104,64058,22268,76252,327957,27060,100038941,17527,215929,23964,192140,67398,84036,76687,113859,56485,59287,20538,239273,171232,11554,237858,22355,76718,238384,74102,113854,434113,224814,12741,14063,11607,20609,…
GO:0071944	cell periphery	cellular_component	2.03e-05	0.0003899	85	9562	117	17789	67821,19739,20273,14707,11933,320225,66066,14704,18438,211446,20272,100303744,14706,14998,98741,50779,20336,11931,21687,210044,20755,11513,24046,76718,18439,16500,75914,100042514,20271,24052,224129,20391,14960,14702,13138,11932,74325,207565,20269,228139,18440,74463,24053,20392,106757,327957,21928,15567,12295,16939,14701,50782,70784,14700,100043318,14616,545391,94212,381091,15002,277978,20759,2075…
GO:0005886	plasma membrane	cellular_component	8.38e-05	0.0014749	77	9562	107	17789	14702,14960,20269,207565,74325,13138,11932,24053,228139,18440,106757,20392,11931,11513,20755,210044,21687,100042514,18439,76718,16500,24046,20391,24052,224129,20271,100303744,20272,14998,98741,50779,14706,320225,11933,19739,67821,20273,14707,18438,14704,66066,24051,20763,14969,14708,271036,14961,15001,12298,15000,244431,18436,14699,20265,94045,20274,20764,12296,16447,94212,20756,20759,381091,1500…
GO:0044459	plasma membrane part	cellular_component	8.8e-05	0.0014749	63	9562	85	17789	13138,14969,11932,74325,24051,207565,20269,14960,14702,15000,20392,12298,106757,228139,15001,18440,24053,271036,14961,14708,21687,14699,11931,18436,244431,20271,24052,20391,24046,12296,76718,94045,16500,20274,18439,20265,20272,15002,381091,14706,50779,98741,14998,12297,110876,20273,67821,14707,19739,11933,327957,320225,66066,100043318,14700,14704,545391,14616,18438,15567,12295,50782,14701
GO:0005794	Golgi apparatus	cellular_component	0.00068259	0.0094914	39	9562	51	17789	###############################################################################################################################################################################################################################################################
GO:0044431	Golgi apparatus part	cellular_component	0.0011494	0.014933	30	9562	38	17789	7.89236e+161
GO:0034702	ion channel complex	cellular_component	0.0013525	0.01737	19	9562	22	17789	2.02722e+99
GO:0034703	cation channel complex	cellular_component	0.0013525	0.01737	19	9562	22	17789	1.22973e+99
GO:0031012	extracellular matrix	cellular_component	0.0013586	0.017382	51	9562	71	17789	12815,108154,17388,118453,239337,17381,17387,17394,208936,207596,233332,223838,30806,30800,330119,94216,17390,12831,77794,108153,12829,12814,115490424,12819,240913,214766,58223,23794,23948,17389,224697,240047,101401,12826,12822,53867,12843,17395,235130,12828,17391,271127,17386,17385,237360,12842,373864,240322,229595,216725,12827
GO:0005815	microtubule organizing center	cellular_component	0.0037293	0.043731	9	9562	9	17789	2.33277e+48
GO:0005795	Golgi stack	cellular_component	0.0037298	0.043731	9	9562	9	17789	1.0091e+50
GO:0005887	integral to plasma membrane	cellular_component	0.0039675	0.04541	23	9562	29	17789	2.02652e+117
GO:0031226	intrinsic to plasma membrane	cellular_component	0.0039675	0.04541	23	9562	29	17789	2.02692e+117
GO:0005488	binding	molecular_function	1.39e-49	2.35e-46	5996	9562	10257	17789	17979,225600,19341,319151,232337,238447,330812,20378,54396,56045,239188,242721,21454,672195,224792,20846,19211,50762,53975,12307,66661,26386,13593,217305,74126,16582,100039795,545388,545030,224814,404634,228942,14584,264064,76561,15432,73389,170638,67399,210297,52563,58800,215821,26422,102638882,234129,12704,17428,217262,21412,67398,15208,381836,102098,97387,56363,328505,69085,270198,16197,15227,…
GO:0043167	ion binding	molecular_function	4.37e-38	1.22e-35	2305	9562	3653	17789	67045,109889,27225,19324,384763,23972,67109,193452,207521,53601,208144,23888,93700,360013,74104,12469,73914,11689,53869,56437,77951,17156,22632,12745,73173,232784,65945,23894,330463,21804,232975,19302,12874,245595,13505,109959,26400,13117,11964,319583,110751,50772,100090,18753,19155,22775,75560,11804,67657,11790,74551,18599,16976,215449,68106,14030,21822,12534,244562,170757,21930,17155,93890,2305…
GO:0016740	transferase activity	molecular_function	2.94e-35	7.6e-33	986	9562	1427	17789	232313,110078,207565,67138,279561,60507,245269,106504,12750,11872,619597,13144,231510,217119,56546,12914,14594,70047,26887,380698,14257,101320,78943,217866,20017,81601,17423,27392,225326,16452,279029,75678,381113,73086,108058,394432,20459,19106,64697,74493,18718,15467,72141,210106,15468,24086,668178,14137,381921,18113,26877,70762,329504,235626,242474,16798,99011,53374,70584,68646,74568,18719,2086…
GO:0005515	protein binding	molecular_function	2.85e-33	6.84e-31	2981	9562	4892	17789	433864,21916,50759,330790,109151,245616,74589,17246,226438,20191,268752,252870,22282,108155,14302,15206,75725,27386,21803,80976,67525,65964,74370,16322,72504,21423,15903,140858,225872,17118,102774,668758,328329,12161,225518,15077,668880,12797,233186,668208,16155,74762,266815,270091,73250,328829,212073,433926,12143,68312,19414,14163,83796,28018,384061,231805,100045778,75659,20286,109054,245007,809…
GO:0016773	phosphotransferase activity, alcohol group as acceptor	molecular_function	5.95e-29	1.18e-26	508	9562	687	17789	11350,23955,240880,59041,12978,14933,20877,225638,227154,16589,269881,58988,26414,213084,105787,19092,665113,11652,26362,192185,331374,238323,22165,12571,19877,16590,13649,240505,269774,381390,226419,50523,208583,17165,140859,20620,140810,19216,56274,266632,22625,17169,18642,56637,66725,18213,20779,110355,16428,13631,18761,12168,227333,18720,217480,69847,225912,14184,16706,20111,15259,228785,7561…
GO:0043168	anion binding	molecular_function	1.07e-24	1.71e-22	1042	9562	1585	17789	16558,233328,212679,237107,217378,26398,16001,191578,217151,223435,24050,19339,240752,20362,18759,74610,338350,226421,216848,14262,100929,19762,72947,233489,140557,545926,234374,20869,18669,69226,21930,104886,74450,100702,26405,29869,382253,68556,68365,18640,70415,232944,26401,17274,69926,71951,216136,60530,18127,667214,18647,72388,442827,71960,237459,217837,24014,20586,64340,108079,69581,224742,…
GO:0004672	protein kinase activity	molecular_function	3.51e-22	4.22e-20	439	9562	606	17789	57740,26412,67045,381836,19108,231580,24013,12748,27206,12704,26564,15258,16337,14302,17289,20811,213326,101055864,12167,19091,26397,58800,320129,226778,11836,18479,14919,331401,233020,270190,20112,11479,16179,13848,264064,16818,73914,66587,67459,18005,328329,18099,20872,381937,109333,269224,13838,58231,13846,73707,244631,23797,117229,14918,18754,381759,65964,23939,12568,18557,320119,83984,56480,…
GO:0016301	kinase activity	molecular_function	4.12e-21	4.62e-19	499	9562	707	17789	11350,240880,23955,59041,12978,171567,20877,225638,227154,16589,26414,58988,269881,213084,105787,19092,665113,11652,26362,331374,192185,238323,22165,19877,13649,16590,12571,240505,381390,269774,226419,50523,208583,17165,140859,20620,140810,19216,56274,266632,22625,17169,18642,56637,66725,16428,20779,18213,110355,13631,18761,227333,12168,18720,69847,217480,225912,14184,16706,20111,15259,16542,7561…
GO:0016772	transferase activity, transferring phosphorus-containing groups	molecular_function	5.14e-21	5.4e-19	594	9562	862	17789	117150,270198,17289,100043772,26564,15258,12704,24013,381836,67045,58800,26397,70408,13139,23972,75847,16818,73914,66587,20872,264064,214627,56717,18707,20112,75578,234730,331401,13846,225913,58231,212862,381937,230661,20815,233789,56480,70428,23939,22138,320404,26400,102626,11480,26413,18760,19882,11790,216151,67072,56626,18753,21813,26420,50772,545156,12534,381835,218832,16885,71481,223649,3822…
GO:0001071	nucleic acid binding transcription factor activity	molecular_function	1.23e-20	1.21e-18	282	9562	367	17789	17131,17425,21387,20728,12915,272382,18124,100041581,21375,26927,21833,20371,17126,18992,14605,65020,14011,76365,26379,29808,54139,83925,329934,14815,223922,382118,18029,80720,73274,68703,16476,20849,12606,13710,208647,13661,19009,170936,18998,107771,19668,21807,20465,217127,116871,15218,74481,15375,19016,18514,11908,13714,15499,14461,14234,15228,69257,20851,13875,170740,449521,218030,80902,16364…
GO:0003700	sequence-specific DNA binding transcription factor activity	molecular_function	1.23e-20	1.21e-18	282	9562	367	17789	54123,104156,19696,56632,100043042,21388,109575,12355,18987,19883,100978,19013,23871,18033,54131,18986,13876,74123,71375,14281,327992,13709,19401,21679,18028,21384,18424,12395,14463,74570,78284,54446,22691,12394,225998,20181,232878,18667,13557,77110,18044,17933,20847,108655,72667,22059,232430,240690,17129,17300,228980,19698,18032,229542,52679,22061,26427,23958,57246,14390,12611,20464,15229,210162…
GO:0030695	GTPase regulator activity	molecular_function	4.76e-20	4.58e-18	142	9562	163	17789	230098,232237,215632,17207,26382,78255,223435,74018,227377,110279,99371,219140,216991,268739,50753,236915,13605,57257,232227,29875,140500,98366,211914,207212,74206,213498,71729,76123,72318,69632,52666,404710,20403,56784,74002,16800,22325,216439,20469,234353,56508,71746,53972,347722,226970,11857,228998,241308,107338,71972,380698,71704,19158,24001,328967,19159,75547,380711,19732,244668,77669,22084,…
GO:0060589	nucleoside-triphosphatase regulator activity	molecular_function	5.03e-20	4.71e-18	147	9562	170	17789	71704,71972,380698,241308,107338,24001,19158,347722,226970,53972,11983,11857,228998,234353,56508,20469,216439,71746,74002,22325,16800,74055,69710,19418,20663,231801,230972,109294,224014,107746,13196,19157,76089,277360,54324,98710,73341,54189,77669,21844,22084,19731,15463,76484,217692,328967,19732,244668,75547,19159,380711,268739,99371,216991,219140,17714,227377,110279,223435,74018,26382,17207,215…
GO:0097367	carbohydrate derivative binding	molecular_function	8.5e-20	7.73e-18	922	9562	1418	17789	11783,74918,208666,13872,26908,71990,234734,20877,269610,16589,58988,227154,30935,75423,19346,213084,50850,319991,105787,16553,224805,11652,238323,19877,67772,100019,70560,240505,16552,13411,17165,20624,16581,381390,226419,16570,50523,140859,16578,22625,103967,14854,56637,12950,27267,76251,13631,69847,12168,668303,15259,19335,228785,19332,13417,67755,100043645,67333,52187,232533,213452,17350,1477…
GO:0017076	purine nucleotide binding	molecular_function	1.32e-18	1.14e-16	903	9562	1395	17789	236930,233020,74142,18479,30934,328329,59040,18099,18005,67459,16576,668880,16179,11479,69716,55932,269224,109333,76367,72039,381759,18754,231931,117229,14677,23912,23797,15275,244631,243374,231646,234847,276952,19300,16573,27206,56298,11966,12748,237886,231580,19108,20174,26412,57740,74691,240255,207704,19718,13211,19338,16337,17687,69721,19091,52398,12167,26874,109151,101055864,192119,213326,22…
GO:0019899	enzyme binding	molecular_function	1.82e-18	1.53e-16	137	9562	159	17789	268739,99371,212999,219140,78309,16211,76448,227377,110279,19878,74018,223435,78255,72584,17207,26382,215632,232237,230098,97031,13367,20403,208846,26554,52666,72318,69632,99375,207212,213498,66011,57257,232227,13605,110750,50753,236915,24001,19158,226432,71972,71704,380698,241308,75717,107338,238799,66515,226970,53972,71746,234353,56508,22325,16800,74002,19418,20663,230972,74055,54324,98710,7334…
GO:0032553	ribonucleotide binding	molecular_function	4.98e-18	4.09e-16	895	9562	1386	17789	26412,57740,20174,231580,19108,12748,11966,237886,56298,27206,16573,19300,276952,16337,19338,19718,13211,207704,240255,74691,192119,213326,109151,26874,101055864,19091,52398,12167,69721,17687,103988,27407,226778,320129,227624,30934,18479,74142,233020,236930,11479,16179,668880,16576,67459,59040,328329,18005,18099,72039,76367,109333,269224,55932,69716,243374,231646,234847,15275,244631,23912,23797,1…
GO:0001882	nucleoside binding	molecular_function	6.88e-18	5.51e-16	882	9562	1365	17789	17169,13495,56274,19216,16205,140810,20620,71819,18761,242505,74591,110355,66725,20111,60440,110960,30933,11861,20224,74044,12144,276950,116904,225028,21354,19353,100705,13680,59041,240880,23955,107045,60344,665113,194219,19092,26414,110821,19182,225638,74355,74351,70099,19340,208583,269774,110957,319955,12571,13649,17219,17164,26415,110542,67979,18712,14469,11303,19094,75770,74178,26407,14853,26…
GO:0001883	purine nucleoside binding	molecular_function	8.42e-18	6.29e-16	881	9562	1364	17789	18555,70661,12326,17347,53859,399510,18481,270163,17215,18563,67848,27404,103080,101540,16653,433653,109168,20878,218639,66887,17912,209012,30931,11666,26918,13207,11858,83984,320119,286942,27061,269152,18557,69834,227674,13209,56526,230577,232441,12568,269019,12566,19326,26417,19330,18000,383592,71602,16564,100043665,381393,338367,268379,668880,16179,11479,59040,328329,18099,18005,67459,16576,23…
GO:0032549	ribonucleoside binding	molecular_function	8.42e-18	6.29e-16	881	9562	1364	17789	665113,194219,19092,110821,26414,19182,225638,100705,13680,59041,23955,240880,107045,60344,208583,269774,110957,319955,13649,12571,17219,74355,70099,74351,19340,71819,18761,74591,242505,110355,66725,17169,13495,56274,19216,140810,16205,20620,12144,276950,116904,225028,21354,19353,60440,20111,110960,11861,30933,74044,20224,71389,319642,13548,18755,11306,246177,70120,59126,11841,214952,106572,14287…
GO:0032550	purine ribonucleoside binding	molecular_function	8.42e-18	6.29e-16	881	9562	1364	17789	26408,667214,13175,20226,442827,381314,620736,74734,18647,72388,60530,69581,78903,224742,237300,665155,27406,16145,237459,71960,64340,20586,13143,216976,108079,217837,18762,24014,17217,29869,227541,70472,56325,26405,223649,56327,382253,68556,19134,18711,100702,74450,104886,11843,17274,224624,69926,80914,68365,244281,27219,232944,26401,70415,18640,66067,12325,216848,18759,12166,20362,108960,67653,…
GO:0035639	purine ribonucleoside triphosphate binding	molecular_function	1.03e-17	7.53e-16	880	9562	1363	17789	75141,67789,224092,237806,26905,208943,17776,16551,83669,623474,67487,18176,103236,231045,269209,18682,21812,268281,23971,68278,170472,76108,17883,20393,71742,403178,19700,72508,12995,17925,72433,240697,234733,74012,17686,219144,72198,56044,12537,110651,18715,170755,59030,80718,12361,70784,64143,223881,100043597,77407,236573,68915,246710,240641,68146,12648,225724,13000,56212,69288,238564,19299,69…
GO:0005216	ion channel activity	molecular_function	1.3e-17	8.75e-16	197	9562	248	17789	329954,14814,110876,16536,57814,16510,14405,22068,14401,14408,16517,14802,16438,26372,56843,226922,22065,67498,26946,110862,333329,22063,20278,11449,110886,20192,12288,14809,12298,63873,193034,16512,30952,12291,211468,14810,170706,15168,12286,20265,12290,94045,20274,12296,225997,16522,16533,74166,12728,239556,16440,330953,56379,98741,504186,227632,14803,28240,246133,20276,26373,16521,53623,268345…
GO:0015267	channel activity	molecular_function	1.3e-17	8.75e-16	197	9562	248	17789	12727,58800,14407,14800,212670,110835,15561,17364,24046,18439,16491,16508,57780,382571,194352,14804,246788,84036,18301,59095,14396,14807,20191,277328,18440,16524,16538,16518,16504,16516,15165,22066,20273,22067,18438,72413,14400,14654,14395,15166,56365,16502,20272,110637,110304,11438,17178,240595,100502876,12790,233979,110834,54652,11440,12289,16492,18436,211480,233649,12725,16539,66733,16506,2424…
GO:0022803	passive transmembrane transporter activity	molecular_function	1.3e-17	8.75e-16	197	9562	248	17789	18439,24046,17364,15561,110835,212670,14407,14800,58800,12727,16538,16524,18440,277328,20191,14807,59095,14396,18301,246788,84036,14804,194352,57780,382571,16508,16491,15166,14395,14654,14400,72413,18438,22067,20273,22066,16516,15165,16504,16518,233979,100502876,12790,17178,240595,11438,110304,110637,20272,16502,56365,242443,16506,66733,16539,12725,233649,211480,16492,18436,12289,11440,54652,1108…
GO:0022838	substrate-specific channel activity	molecular_function	1.3e-17	8.75e-16	197	9562	248	17789	15561,110835,18439,17364,24046,14407,14800,58800,12727,212670,18301,246788,84036,16538,16524,18440,20191,277328,59095,14807,14396,382571,57780,16508,16491,14804,194352,14654,72413,14400,18438,15166,14395,16516,15165,16504,16518,22067,20273,22066,100502876,12790,233979,20272,16502,56365,240595,17178,11438,110304,110637,12725,233649,211480,242443,16506,66733,16539,11440,54652,110834,16492,18436,122…
GO:0032555	purine ribonucleotide binding	molecular_function	2.26e-17	1.49e-15	886	9562	1376	17789	320119,27061,286942,18557,269152,11858,83984,30931,26918,13207,11666,227674,69834,230577,56526,13209,12568,232441,12566,269019,19330,26417,19326,383592,18000,268379,338367,381393,100043665,16564,71602,70661,17347,12326,18555,399510,53859,270163,18481,18563,17215,20878,433653,109168,16653,101540,103080,27404,67848,218639,209012,17912,66887,16337,19338,19718,13211,207704,240255,74691,57740,26412,20…
GO:0051020	GTPase binding	molecular_function	1.71e-16	1.09e-14	120	9562	139	17789	226970,53972,24001,102098,234094,226432,19158,73728,380698,71972,71704,107338,238799,241308,22325,622434,30938,16800,320292,74002,243621,71746,56508,234353,98710,54324,73341,76582,268480,224014,107746,109294,65246,277360,19157,76089,56419,19418,192786,230972,235633,20663,19419,74055,240168,19732,75547,19159,19417,328967,213649,16801,76484,381112,75751,19731,109934,21844,77669,54126,320727,56349,2…
GO:0005215	transporter activity	molecular_function	8.6e-16	5.36e-14	474	9562	695	17789	74104,16502,56365,224814,117591,20272,80979,110637,240595,17178,381884,11438,74446,226781,12790,27411,16646,233979,231999,57738,16518,24060,15165,16516,68775,20273,56315,72413,66500,14654,12992,20499,108115,77031,14395,15166,20529,16491,382571,57780,16508,171429,224661,53881,109342,14804,84036,11975,328133,28248,20191,56485,14807,16538,106947,19300,18440,20538,58800,56774,239273,14407,27416,22785…
GO:0046872	metal ion binding	molecular_function	1.3e-15	7.95e-14	1304	9562	2116	17789	11803,17391,54156,224170,225743,72723,19713,67785,99334,240322,22704,93710,384806,170677,233168,21826,13929,68818,16875,22026,11628,14299,100043034,381463,13110,320878,54630,114570,118445,211389,19128,94088,228413,13983,17752,93706,408068,74120,118453,13506,330230,632687,93699,211147,57432,67538,68337,67302,241201,20656,66865,15378,22717,30841,13107,21924,20585,71865,269016,17313,14464,72925,3308…
GO:0043169	cation binding	molecular_function	1.37e-15	8.23e-14	1309	9562	2125	17789	17975,80334,22773,93681,53318,67331,14201,12558,100043381,102502,29865,224454,94214,216825,210583,380928,210105,11502,195522,74149,57782,16975,56515,18570,17932,68729,67618,17188,16869,328977,13108,18073,16998,22678,30806,666311,73729,80287,18227,75753,22644,22658,212281,230848,108154,268935,66510,408062,100494,223669,269704,20745,64707,54201,22222,13078,319660,105298,270086,16796,70640,101401,69…
GO:0005085	guanyl-nucleotide exchange factor activity	molecular_function	9.3e-15	5.49e-13	99	9562	113	17789	53972,226970,234094,19158,73728,24001,102098,107338,241308,71972,71704,380698,30938,16800,22325,622434,243621,320292,74002,71746,56508,234353,54324,98710,73341,277360,19157,76089,268480,224014,107746,109294,230972,235633,20663,19418,192786,240168,19419,74055,19159,75547,19732,328967,16801,19417,213649,76484,381112,19731,109934,77669,21844,56349,54126,74018,223435,227377,110279,219140,72754,99371,…
GO:0005524	ATP binding	molecular_function	8.53e-14	4.95e-12	672	9562	1041	17789	100043597,68915,240641,12648,225724,13000,19299,238564,69562,97541,668225,104806,12995,72508,17925,240697,17686,234733,72198,12537,110651,18715,170755,59030,12361,18682,21812,23971,268281,68278,170472,17883,71742,20393,67789,237806,208943,17776,16551,83669,67487,623474,231045,103236,269209,230809,18004,56504,224530,16150,12461,228012,320209,234854,68087,71382,20817,13871,23920,216877,18749,107271…
GO:0030554	adenyl nucleotide binding	molecular_function	1.84e-13	1.05e-11	678	9562	1054	17789	330149,26410,102436,224105,546071,50883,11352,212032,244141,13728,16560,66196,73804,24086,381921,70762,16798,70584,16572,101320,78943,217866,279029,73086,75678,381113,108058,19106,19687,15467,207565,72482,279561,245269,106504,66590,12750,13144,71981,380698,67155,22200,24061,106344,15201,108156,107476,381979,212880,26406,27409,12675,29807,330177,217718,16563,17713,102414,71567,17913,22321,12464,10…
GO:0036094	small molecule binding	molecular_function	1.92e-13	1.08e-11	1234	9562	2018	17789	170759,15381,545929,14676,18752,104303,19384,14773,18195,69207,17876,74213,382137,11980,14772,329421,17921,213452,75710,19345,26559,207181,217371,76308,11844,13046,114896,26900,235344,104721,56258,228543,28030,75607,14415,13549,214901,22241,18115,52856,68134,224805,101214,50523,633285,17165,20624,13411,19877,67772,16552,100019,234734,71990,13872,319765,11783,50850,319991,75423,237073,17184,17850,…
GO:0008144	drug binding	molecular_function	2.37e-13	1.31e-11	705	9562	1101	17789	279029,101320,78943,217866,15467,19687,19106,108058,75678,381113,73086,13144,12750,66590,106504,245269,279561,207565,380698,71981,102436,224105,26410,330149,13728,212032,244141,11352,50883,546071,70762,381921,24086,73804,66196,16560,16572,70584,16798,12464,22321,17913,71567,18751,225997,107951,72149,13867,229363,71941,69663,12780,22375,26921,75292,26419,67027,105148,215303,628475,69131,81000,1232…
GO:0032559	adenyl ribonucleotide binding	molecular_function	2.7e-13	1.47e-11	676	9562	1052	17789	233020,30934,18479,74142,236930,668880,11479,16179,18099,18005,328329,16576,67459,72039,69716,76367,109333,269224,23797,117229,234847,231646,15275,244631,381759,18754,231580,19108,11966,12748,237886,26412,57740,20174,19300,27206,16573,240255,16337,13211,19718,74691,12167,19091,213326,192119,109151,26874,101055864,17687,27407,320129,226778,103988,18481,270163,17215,18563,18555,17347,70661,12326,53…
GO:0022857	transmembrane transporter activity	molecular_function	2.86e-13	1.53e-11	398	9562	585	17789	12724,20271,27421,214112,16500,14394,14806,14977,242607,320718,12638,16439,59033,240444,57014,20528,11435,12788,16531,331004,11984,11441,229782,268345,241919,74096,14402,68427,11951,16514,20277,14812,23985,353169,72002,227659,227632,14803,28240,227059,20536,53623,26373,16521,105243,12286,71699,26570,20520,11941,94045,12296,12290,22598,12728,210148,239556,94281,12859,330953,56199,56379,16440,63873…
GO:0000166	nucleotide binding	molecular_function	1.27e-12	6.11e-11	1184	9562	1940	17789	20817,14670,66369,268859,76183,18004,224530,270192,19416,12461,228012,53886,78394,21687,242570,22114,71966,104318,69908,100568458,27377,67331,17857,216877,17975,107271,110350,13990,52202,76897,72433,240697,12995,17925,74012,17686,234733,67959,110651,268756,70784,80718,12361,59030,77411,223881,236573,100043597,241633,240641,246710,13000,245945,68146,12648,104015,56212,69562,19299,668225,97541,1933…
GO:1901265	nucleoside phosphate binding	molecular_function	1.27e-12	6.11e-11	1184	9562	1940	17789	116904,225028,19353,12144,30933,110960,14686,60440,226604,74111,18761,110355,140810,50912,19216,14263,50926,56274,13495,13649,110957,17219,208583,269774,70099,19655,26414,110821,20639,194219,240880,59041,60344,100705,30946,19704,13869,56195,381072,230257,71724,26399,75770,74178,54720,210009,11938,109264,11842,106572,230073,170722,17216,108013,13548,93759,71389,23881,11841,59126,14555,11306,246177…
GO:0004674	protein serine/threonine kinase activity	molecular_function	6.27e-12	2.78e-10	67	9562	74	17789	240505,20868,11920,17776,11652,225997,18751,11480,103236,233789,225638,58988,108737,110279,21812,12322,20393,214897,72508,116904,110651,71481,12168,69847,170755,20111,12675,12325,13631,18761,12166,13400,19216,56274,21813,320795,18753,70425,58800,217866,12167,27219,73086,20874,108058,279561,12323,106504,29869,11481,226751,67045,232341,18755,23797,269275,11482,18754,546071,58231,109333,11479,328329…
GO:0022891	substrate-specific transmembrane transporter activity	molecular_function	6.11e-11	2.34e-09	345	9562	512	17789	242443,66733,211480,213053,18436,16492,12289,11440,52076,11988,338370,20511,12789,216441,56543,13340,11444,16535,14404,320007,16509,69048,142681,94229,108043,208890,14658,11447,74338,241794,240776,99738,58226,20530,24046,18439,231583,15561,212670,63959,14800,94280,12727,16524,59095,14396,277328,13162,14057,246788,18301,229706,194352,20510,338365,240332,21871,103098,14400,18438,22067,22066,106957,…
GO:0005083	small GTPase regulator activity	molecular_function	6.99e-11	2.64e-09	78	9562	91	17789	230098,223254,14163,192662,232237,13998,215632,17207,102075,26382,245666,211673,223435,74018,110279,227377,56349,54126,99371,219140,72754,268739,545156,50753,236915,13605,57257,232227,442801,16443,207212,213498,110596,213783,72318,69632,52666,20403,269608,243621,74002,30938,16800,622434,22325,234353,53972,226970,11857,107338,380698,71972,71704,73728,234094,19158,102098,24001,213649,328967,19417,1…
GO:0017016	Ras GTPase binding	molecular_function	9.98e-11	3.69e-09	82	9562	97	17789	19418,56419,230972,235633,20663,224014,109294,65246,277360,54324,73341,76582,75751,109934,77669,21844,381112,328967,213649,19417,16801,75547,380698,71972,71704,238799,24001,102098,234094,226432,226970,53972,22325,622434,16800,30938,52666,213783,69632,269608,208846,20403,213498,207212,16443,66011,110596,442801,74204,57257,57778,236915,545156,233726,13605,110750,16211,268739,22379,72754,219140,2129…
GO:0031267	small GTPase binding	molecular_function	9.98e-11	3.69e-09	82	9562	97	17789	56419,19418,230972,20663,235633,73341,54324,76582,224014,109294,65246,277360,381112,75751,109934,21844,77669,75547,328967,16801,19417,213649,24001,102098,234094,226432,71704,71972,380698,238799,226970,53972,22325,622434,16800,30938,269608,208846,20403,52666,213783,69632,110596,213498,207212,66011,16443,57778,442801,74204,57257,233726,13605,110750,236915,545156,268739,22379,219140,72754,212999,162…
GO:0022892	substrate-specific transporter activity	molecular_function	1.12e-10	4.11e-09	362	9562	542	17789	241794,99738,240776,20530,58226,16647,74338,11447,208890,14658,108043,142681,94229,16509,69048,16535,14404,11444,320007,16649,216441,12789,56543,13340,20511,52076,338370,11988,11440,79554,213053,18436,16492,12289,211480,242443,66733,236794,110304,71279,100502876,268512,30962,94279,16504,106957,22067,22066,103098,18438,14400,338365,240332,21871,20510,328370,229706,194352,13162,246788,14057,18301,1…
GO:0008289	lipid binding	molecular_function	1.44e-10	5.2e-09	108	9562	135	17789	278679,170460,66696,101113,18705,68018,18559,66616,236920,76561,11814,11745,626615,11746,56356,231834,245282,59045,244962,102141,11750,26359,67804,381823,76742,102607,18806,268396,69226,243362,99138,229593,231999,233071,75761,71898,328563,70160,545477,11747,66629,218699,20845,378700,11835,71939,17972,266781,29816,23943,14815,11749,108956,71790,240752,20616,79554,69024,272636,215114,382083,13982,1…
GO:0046873	metal ion transmembrane transporter activity	molecular_function	3.09e-10	1.11e-08	104	9562	130	17789	16533,22598,243616,16440,67972,56379,16492,213053,11941,211480,223473,20265,72027,12296,16522,20274,55963,16519,20514,170706,67547,11418,12298,20511,22599,11419,20278,381290,16513,20192,53945,72392,16517,16509,16438,69806,15567,110862,12295,240776,14664,16536,20530,214922,57814,74552,16523,74338,21366,20512,102857,11944,140493,12297,110876,14977,56774,242607,20538,102680,214112,104245,20271,24046…
GO:0015075	ion transmembrane transporter activity	molecular_function	3.85e-10	1.36e-08	337	9562	504	17789	20515,102443351,57249,13521,140494,14403,14406,30791,11936,109108,504186,76713,14411,246133,20276,11950,50934,98741,14799,16494,94282,232156,104245,70701,233280,14813,236727,20505,234076,207565,20269,14811,64177,320707,228139,232333,328699,16511,14809,22063,11449,26946,20544,67498,13487,22065,56843,226922,74087,22068,16510,20512,20516,14814,110876,329954,243616,330836,67972,224022,74166,16533,222…
GO:0022836	gated channel activity	molecular_function	5.07e-10	1.76e-08	107	9562	135	17789	110834,16533,11440,12728,56379,18436,16492,211480,12725,20265,16522,12296,94045,20274,242443,16519,12723,170706,14810,12298,237213,108043,11449,108015,110886,14809,16513,20192,16517,14802,26372,16509,11444,14404,12295,240776,57814,110902,14405,16523,14408,14401,11447,140493,11870,14814,12297,14658,110876,12727,14800,14407,14799,110835,20271,12724,15561,14806,24046,16500,18439,14394,20269,207565,1…
GO:0022839	ion gated channel activity	molecular_function	5.07e-10	1.76e-08	107	9562	135	17789	14810,170706,12723,16519,237213,12298,56379,18436,16492,12728,11440,16533,110834,94045,20274,242443,12296,16522,20265,12725,211480,14401,14408,16523,14405,110902,57814,240776,110876,12297,14658,14814,11870,140493,11447,20192,16513,14809,110886,108015,11449,108043,11444,12295,14404,26372,16509,14802,16517,14804,11441,14813,16531,14811,207565,20269,16524,11435,228139,18440,20191,14396,14807,328699,…
GO:0008509	anion transmembrane transporter activity	molecular_function	8.42e-10	2.86e-08	320	9562	478	17789	16502,56365,20272,110637,80979,17178,240595,381884,11438,74446,12790,233979,16518,24060,16516,15165,68775,20273,72413,56315,14654,77031,14395,15166,20529,16491,57780,382571,16508,171429,224661,14804,84036,11975,328133,20191,14807,106947,16538,18440,20538,58800,56774,14407,102680,245128,110835,17364,74102,22232,214922,60613,21366,16523,110902,226025,16490,140493,11870,12297,192775,252972,108015,11…
GO:0042578	phosphoric ester hydrolase activity	molecular_function	9.13e-10	3.07e-08	140	9562	186	17789	19250,15170,233552,24018,19279,19252,233537,107569,19274,70881,227399,19247,235584,72391,19245,19271,80915,14121,72349,19256,269437,68106,19243,105352,234129,18802,19253,18573,19263,19267,19262,218232,19280,19283,101490,17330,18803,19244,12531,67881,67446,18796,19211,218294,13853,56294,219024,20975,19268,225600,24000,19260,12530,56209,56318,241489,19258,66610,403178,76571,13537,19249,19266,18576,…
GO:0005543	phospholipid binding	molecular_function	9.4e-10	3.13e-08	63	9562	72	17789	233071,330914,229593,209131,11747,70160,233489,72183,170755,74478,58240,66895,69150,11744,64652,266781,227449,17972,235406,18805,69178,66629,218699,55988,71982,225861,170625,17969,11749,29816,14218,66616,18705,69024,101113,20616,240752,71790,66696,18704,74479,231834,11746,11745,11752,76561,382083,215114,320119,102141,244962,74718,142682,69226,268396,18806,16558,102607,76742,67804,217463,11750,263…
GO:0008270	zinc ion binding	molecular_function	1.36e-09	4.49e-08	489	9562	765	17789	71779,52915,11810,384806,19303,110784,101543,240913,217166,13929,52463,68818,240047,16875,217365,22026,16796,11628,101401,71164,22222,328572,17391,224170,225743,667823,67785,100494,64707,213436,240322,22670,13983,16475,233908,74112,74729,69097,22036,16790,381678,94091,22129,22380,118453,101471,70574,101700,228136,13437,102193,632687,76223,381463,194401,67845,140481,56438,320878,54630,19411,114570…
GO:0005509	calcium ion binding	molecular_function	2.2e-09	7.17e-08	281	9562	416	17789	546336,20203,12845,12561,12308,268935,93712,18570,71768,268958,26369,11749,69398,18073,16998,94214,215654,20391,12937,18129,16975,17313,21924,19123,80334,29865,241201,102502,93699,93711,11750,140904,12558,230815,353235,14115,13506,14058,54003,56461,93706,93713,70405,338352,219228,193813,270084,228413,19128,12373,64706,65116,12372,14299,54216,230971,105298,192650,21826,93701,216001,170677,93710,20…
GO:0043565	sequence-specific DNA binding	molecular_function	3.95e-09	1.27e-07	152	9562	208	17789	18612,14460,232430,27049,21907,20182,15500,14238,14465,26424,21685,22433,14247,26381,108655,21834,18227,436240,14235,26427,14462,23958,14390,12611,15229,15378,242620,14464,11910,17300,13713,229542,14536,13864,15223,381463,13170,14241,19411,13876,74123,71375,13983,104156,242523,114142,56632,12355,14236,14233,101185,19883,20375,23871,19013,13712,17301,217082,78284,240590,16477,231991,20181,225998,1…
GO:0015103	inorganic anion transmembrane transporter activity	molecular_function	4.51e-09	1.39e-07	308	9562	463	17789	20277,16514,11951,14812,241919,268345,14402,68427,74096,28240,14803,227059,227632,72002,16521,26373,53623,23985,242607,14977,320718,214112,20271,12724,14806,14394,16500,11984,331004,16531,229782,11441,240444,57014,16439,12788,11435,333329,22599,20278,381290,110886,226999,53945,12288,20192,16517,14802,208169,67942,16438,26372,69806,110862,15567,14664,16536,11974,57814,74552,14405,14408,14401,11944…
GO:0015114	phosphate ion transmembrane transporter activity	molecular_function	4.51e-09	1.39e-07	308	9562	463	17789	140493,16490,11870,12297,214922,60613,22232,110902,16523,21366,226025,72392,170738,12295,252972,192775,76252,11419,225030,108015,16513,27060,11987,237213,67843,12287,55963,20514,16519,12723,11418,233649,12725,16539,72027,16506,110834,54652,11732,12790,74446,233979,56365,16502,20272,110637,80979,381884,11438,240595,17178,72413,14654,77031,14395,20529,15166,24060,16518,68775,16516,15165,20273,11975…
GO:0015318	inorganic solute uptake transmembrane transporter activity	molecular_function	4.51e-09	1.39e-07	308	9562	463	17789	20273,15165,16516,68775,16518,24060,20529,15166,14395,77031,14654,72413,240595,17178,11438,381884,110637,80979,20272,16502,56365,233979,74446,12790,14407,58800,20538,56774,74102,17364,245128,110835,102680,14804,224661,382571,57780,16508,171429,16491,106947,16538,18440,20191,14807,328133,11975,84036,27060,16513,108015,11419,76252,225030,192775,252972,12295,170738,72392,226025,21366,16523,110902,22…
GO:0015563	uptake transmembrane transporter activity	molecular_function	4.51e-09	1.39e-07	308	9562	463	17789	14804,224661,382571,57780,171429,16508,16491,16538,106947,18440,20191,14807,328133,84036,11975,14407,58800,20538,56774,74102,17364,245128,110835,102680,17178,240595,381884,11438,110637,80979,20272,16502,56365,233979,74446,12790,20273,15165,16516,68775,16518,24060,15166,20529,77031,14395,14654,72413,11418,12723,16519,20514,55963,12287,67843,237213,11987,11732,54652,110834,16506,72027,16539,12725,2…
GO:0017048	Rho GTPase binding	molecular_function	5.64e-09	1.71e-07	69	9562	82	17789	13998,102075,26382,17207,54004,19877,232237,223254,13367,230098,14163,72754,219140,268739,22379,56349,54126,223435,74018,19878,110279,227377,57778,57257,442801,13605,236915,545156,20403,208846,269608,69632,213783,52666,110596,16443,213498,207212,16800,30938,22325,622434,234094,24001,102098,71704,71972,380698,53972,226970,381112,109934,21844,77669,75547,328967,213649,19417,16801,230972,235633,2066…
GO:0005088	Ras guanyl-nucleotide exchange factor activity	molecular_function	8.3e-09	2.39e-07	61	9562	71	17789	56349,54126,223435,74018,53972,226970,227377,110279,72754,234094,219140,24001,268739,102098,380698,71972,71704,16800,30938,232237,22325,622434,223254,230098,14163,13998,26382,102075,17207,110596,73341,54324,16443,277360,224014,213498,207212,109294,230972,20663,235633,20403,269608,19418,69632,213783,52666,75547,13605,328967,236915,19417,16801,213649,545156,381112,109934,57257,77669,21844,442801
GO:0005089	Rho guanyl-nucleotide exchange factor activity	molecular_function	8.3e-09	2.39e-07	61	9562	71	17789	56349,54126,74018,223435,53972,227377,226970,110279,72754,234094,219140,24001,268739,102098,71972,380698,71704,30938,16800,22325,232237,622434,223254,230098,14163,13998,102075,26382,17207,110596,73341,54324,277360,16443,213498,224014,207212,109294,230972,20403,235633,20663,269608,19418,213783,69632,52666,75547,13605,328967,16801,236915,19417,213649,545156,381112,109934,57257,77669,21844,442801
GO:0035091	phosphatidylinositol binding	molecular_function	1.15e-08	3.23e-07	50	9562	56	17789	320119,102141,142682,74718,244962,102607,76742,69226,268396,18806,16558,217463,67804,18705,69024,101113,66616,240752,66696,18704,231834,74479,382083,76561,266781,64652,69150,235406,18805,66629,69178,218699,17972,227449,17969,71982,225861,55988,170625,14218,330914,233071,209131,229593,170755,72183,70160,66895,58240,74478
GO:0016757	transferase activity, transferring glycosyl groups	molecular_function	1.49e-08	4.08e-07	139	9562	189	17789	67574,68273,74241,225742,53625,73379,106248,71001,67292,241230,272411,67375,20444,94192,268880,20450,20454,269941,78752,232984,280645,394436,22239,11545,13135,16848,20451,269181,55981,73068,223827,117592,330406,11870,93961,54613,394434,14755,14936,72962,20445,22234,654821,17309,50935,16795,74782,78923,243085,171167,72727,110417,80908,99011,214424,26878,14348,26877,20440,17308,66435,27357,67556,22…
GO:0003824	catalytic activity	molecular_function	7.17e-08	1.87e-06	2547	9562	4474	17789	238023,26410,102436,103199,11352,244141,14159,16560,22217,11671,237860,18113,239017,100043108,235626,78373,217364,59012,101320,104184,625249,16452,78787,381113,73086,20459,74493,22154,279561,66054,13144,619597,240672,12914,380698,112407,11687,330260,74157,210992,102238433,12675,12333,29807,54721,11676,216188,244349,14751,338403,14173,15547,73078,54611,234356,107951,12630,26921,12780,22375,67418,2…
GO:0015276	ligand-gated ion channel activity	molecular_function	7.46e-08	1.92e-06	72	9562	89	17789	16522,242443,94045,211480,18436,56379,11440,110834,237213,14810,16519,14404,11444,14802,16517,14809,16513,20192,110886,11449,108015,108043,14658,11870,14814,11447,14408,14401,110902,16523,14405,18439,14394,14806,110835,15561,14799,14800,14407,228139,18440,16524,11435,14807,14396,20191,328699,57014,14804,11441,14813,14811,207565,14403,14406,14402,14395,14654,18438,14400,14812,57249,16516,16518,165…
GO:0022834	ligand-gated channel activity	molecular_function	7.46e-08	1.92e-06	72	9562	89	17789	14802,16517,14404,11444,108043,11449,108015,110886,16513,14809,20192,11447,11870,14814,14658,110902,14405,16523,14408,14401,211480,16522,242443,94045,110834,11440,56379,18436,237213,16519,14810,18438,14400,14654,14402,14395,14403,14406,16518,16514,57249,16516,14812,14803,504186,16521,110637,110304,11438,53623,110835,15561,14806,14394,18439,14800,14407,14799,57014,328699,14807,14396,20191,228139,1…
GO:0016787	hydrolase activity	molecular_function	1.63e-07	4.15e-06	952	9562	1600	17789	20975,74104,231382,80898,360013,224814,56094,219024,16582,76773,22153,70478,237911,19348,11307,74108,208144,100163,14944,229709,19211,11496,217207,94184,56318,16559,11491,75894,66988,16912,17388,93762,17288,11484,24000,17156,225600,69305,15932,19262,21744,56417,67398,217262,58242,217057,76687,234129,26440,14590,66967,19055,72162,52563,239273,27416,67446,210622,17228,73218,74388,71715,246104,14950…
GO:0008194	UDP-glycosyltransferase activity	molecular_function	3.84e-07	9.58e-06	28	9562	29	17789	2.69941e+152
GO:0015291	secondary active transmembrane transporter activity	molecular_function	5.18e-07	1.25e-05	45	9562	52	17789	22232,14411,76713,20516,14664,20512,381884,74338,21366,236794,74446,102857,22599,24060,226999,67473,20515,103098,208169,240332,15567,20544,77031,331004,20514,20510,234076,55963,236727,229706,229782,13162,20511,232333,67843,22598,20538,242607,56774,243616,105243,104245,102680,97086,74102
GO:0019001	guanyl nucleotide binding	molecular_function	5.53e-07	1.33e-05	228	9562	344	17789	218639,215449,19332,19353,109168,433653,16653,21822,103080,213990,30877,19335,60440,20224,74551,14686,11861,320982,242505,229900,66725,67657,67059,100972,103967,13495,73991,14680,16205,67790,76338,19330,20624,19326,229898,14674,381812,100101806,18000,19340,19346,76877,69834,75423,74006,11858,26908,232441,208666,56526,83408,54396,231931,54170,67166,14677,23912,68708,243374,626578,56437,217371,5593…
GO:0005230	extracellular ligand-gated ion channel activity	molecular_function	7.47e-07	1.78e-05	58	9562	71	17789	110835,15561,18439,94045,242443,14394,14806,14800,14407,11440,110834,18436,14799,328699,57014,228139,18440,11435,14396,14807,237213,14811,207565,14804,11441,14810,14813,14654,14802,18438,14400,14403,14404,11444,14406,14402,14395,11449,57249,108015,108043,14809,14812,110886,11447,14658,11870,14814,14803,504186,11438,14408,53623,14401,110637,110902,14405,110304
GO:0022804	active transmembrane transporter activity	molecular_function	8.65e-07	2.05e-05	74	9562	95	17789	22232,14664,20516,20512,21366,74338,11944,102857,74610,19299,21354,22599,226999,381290,18669,244562,208169,15567,20544,20514,11666,55963,27061,12780,67126,20511,20928,67843,22598,18671,56199,243616,67972,105243,11941,97086,14411,224814,76713,74104,381884,236794,74446,24060,73834,20515,67473,103098,240332,77031,56325,331004,234076,20510,236727,229782,229706,13162,232333,19300,320707,11306,239273,5…
GO:0004872	receptor activity	molecular_function	2.06e-06	4.77e-05	564	9562	925	17789	13489,113859,626942,14804,232962,670940,11554,22355,113854,434113,225192,171232,18389,545934,23796,13610,224792,171190,210933,140795,78826,353346,11540,252909,14063,110637,11607,233221,14748,16190,622222,11835,20609,546943,17202,171226,22310,100042437,216144,81016,65086,54140,232959,57385,232431,404287,233080,624845,83770,20606,321019,381853,171237,636731,21338,113851,11480,171267,171264,94226,13…
GO:0015293	symporter activity	molecular_function	2.84e-06	6.49e-05	31	9562	34	17789	6.78432e+165
GO:0015294	solute:cation symporter activity	molecular_function	2.84e-06	6.49e-05	31	9562	34	17789	2.05382e+165
GO:0005096	GTPase activator activity	molecular_function	3.55e-06	8.06e-05	36	9562	41	17789	###############################################################################################################################################################################################################################################################
GO:0016881	acid-amino acid ligase activity	molecular_function	4.08e-06	9.16e-05	43	9562	51	17789	67138,67588,329152,140629,73998,83814,140630,15204,70790,66313,75788,19373,12211,56424,107568,68497,14897,76608,16396,77853,17999,100763,28000,63958,14854,94253,68350,66156,72106,72137,66894,226098,22215,22200,217558,209462,14629,269700,59026,207304,19647,225164,117146
GO:0016791	phosphatase activity	molecular_function	4.42e-06	9.72e-05	95	9562	130	17789	545902,70881,227399,19274,107569,11432,100040244,19252,19277,19279,245857,24018,19266,19249,13537,76571,15170,19250,66610,68106,101744,14120,19255,19256,72349,14121,319520,56405,80915,19245,19271,545622,235584,72391,229776,72102,19247,19259,104831,237928,73373,67446,67881,12531,17330,50773,19244,19283,19280,19248,218232,66461,19262,19281,66959,235534,67603,19246,70686,320139,19267,240672,19263,19…
GO:0003677	DNA binding	molecular_function	6.28e-06	0.00013728	654	9562	1088	17789	15214,15430,22099,60611,15206,66500,15433,26380,64290,212712,56296,56484,15077,12020,360198,68275,67260,226641,246086,20475,320995,270004,23857,239099,17687,13418,403175,100135654,192119,12916,384452,17286,20471,19718,81703,16658,18736,20588,83557,219150,18021,21749,12609,19374,110805,210719,216285,319162,108946,18997,19664,21750,12399,20185,229603,105980075,13711,17215,54352,140477,12912,15424,2…
GO:0030234	enzyme regulator activity	molecular_function	6.57e-06	0.00014175	209	9562	318	17789	328967,12577,19732,244668,380711,75547,19159,19731,15463,21844,77669,22084,76484,217692,209378,235505,224014,13196,107746,109294,12576,277360,74023,76089,19157,73341,98710,54324,54189,74055,69710,19418,192231,231801,230972,20663,74002,21789,22325,16800,56508,234353,20469,216439,433016,71746,226970,347722,215001,53972,71856,11983,228998,11857,71972,71704,380698,107338,241308,24001,66402,19158,2369…
GO:0004871	signal transducer activity	molecular_function	6.73e-06	0.00014235	543	9562	893	17789	107934,626828,12267,319239,171252,18145,15559,171238,381886,672125,233919,243628,12773,171192,113864,11553,11548,433070,211223,15564,171270,211577,19204,11539,21337,243764,171200,171257,15550,171278,627367,269902,22313,110789,435975,319217,171189,70771,435529,666085,113863,12802,81006,11479,100042225,15466,12057,235854,15560,30044,432735,252837,171255,387285,237362,171254,12167,12772,14745,384522…
GO:0038023	signaling receptor activity	molecular_function	6.73e-06	0.00014235	543	9562	893	17789	93690,252905,665255,70839,14816,18216,668725,404286,626397,78560,545874,100036518,56552,22307,628580,14527,12061,14739,243979,665227,70355,12426,13617,229714,12777,14813,211612,627626,207565,14811,436090,67217,209824,268934,212541,632793,628444,113852,171265,14809,12768,384219,667069,13492,208188,319430,100312485,19219,19217,384221,18387,54598,19220,243407,546901,12502,100043101,632534,15566,1712…
GO:0060089	molecular transducer activity	molecular_function	6.73e-06	0.00014235	543	9562	893	17789	15552,171187,171185,15465,625823,53883,170757,171230,434701,216749,108072,171199,228139,330581,243270,14799,12425,233437,434017,171231,171236,93896,621430,21390,638102,240888,627814,171247,232367,83771,18167,14764,14766,12614,140741,19222,14765,269604,12921,18166,67168,16001,620672,19065,107831,58182,13866,22095,11549,252907,171203,666002,353344,246313,81010,13491,100312477,107221,235712,207911,2…
GO:0015370	solute:sodium symporter activity	molecular_function	8.46e-06	0.00017687	26	9562	28	17789	1.44112e+139
GO:0004842	ubiquitin-protein ligase activity	molecular_function	8.83e-06	0.00017871	39	9562	46	17789	###############################################################################################################################################################################################################################################################
GO:0019787	small conjugating protein ligase activity	molecular_function	8.83e-06	0.00017871	39	9562	46	17789	###############################################################################################################################################################################################################################################################
GO:0008083	growth factor activity	molecular_function	8.85e-06	0.00017871	64	9562	83	17789	14559,16324,320202,13590,18119,14175,17242,12977,19242,14174,14173,17700,18654,14176,12162,14180,80903,14164,14563,14573,80857,54635,14171,14177,14566,12164,12159,21808,16196,14172,12165,11876,14165,56636,14167,18590,14178,14205,242316,16191,21809,22340,64654,14169,14562,16326,16183,14560,93898,14170,14561,14166,21803,22339,67112,16322,12156,16323,110075,18591,12161,70314,54189,12154
GO:0005244	voltage-gated ion channel activity	molecular_function	8.89e-06	0.00017871	39	9562	46	17789	###############################################################################################################################################################################################################################################################
GO:0022832	voltage-gated channel activity	molecular_function	8.89e-06	0.00017871	39	9562	46	17789	###############################################################################################################################################################################################################################################################
GO:0015081	sodium ion transmembrane transporter activity	molecular_function	8.92e-06	0.00017871	39	9562	46	17789	###############################################################################################################################################################################################################################################################
GO:0004721	phosphoprotein phosphatase activity	molecular_function	9.27e-06	0.00018455	75	9562	100	17789	19250,15170,76571,13537,19249,19266,24018,245857,19279,19277,19252,100040244,19274,545902,19259,104831,19247,72102,229776,235584,72391,545622,19245,19271,80915,56405,319520,72349,19256,19255,19243,105352,234129,19253,19043,240672,19263,70686,320139,19267,19246,67603,19281,66959,19262,66461,218232,19280,19248,19283,19244,12531,67446,19211,218294,75219,13853,56294,63953,237860,19273,240892,19272,19…
GO:0004888	transmembrane signaling receptor activity	molecular_function	1.2e-05	0.00023699	539	9562	889	17789	231589,54199,171228,574402,14806,627111,20605,108073,171241,12771,637004,14763,669149,80901,668727,14812,11482,171195,14761,330814,11542,15557,53623,319293,14803,15558,628422,171258,64378,241263,637908,11536,171272,13618,21336,100042591,14608,14760,12209,12145,107515,632671,171193,238377,113848,12776,383258,240239,11517,14715,227326,12273,14802,11551,100129,171259,22301,100312473,100312484,320795…
GO:0008373	sialyltransferase activity	molecular_function	1.29e-05	0.00025325	22	9562	23	17789	7.33792e+113
GO:0005261	cation channel activity	molecular_function	1.3e-05	0.00025478	61	9562	79	17789	20265,94045,20274,18439,16500,16522,24046,12296,211480,20271,16440,56379,18436,16492,74166,16533,20191,16524,52076,18440,228139,12298,84036,16439,170706,11418,20269,207565,16531,16519,12295,110862,72413,18438,72392,16517,16509,16438,20192,20273,16513,16518,16514,20277,16516,20278,11419,110876,12297,100502876,98741,140493,16523,16521,227632,240776,16536,246133,20276,20272,57814
GO:0032561	guanyl ribonucleotide binding	molecular_function	1.47e-05	0.00028546	213	9562	327	17789	11858,76877,69834,74006,75423,19346,208666,56526,232441,26908,229898,19326,20624,19330,67790,76338,18000,19340,381812,100101806,103967,100972,67059,67657,229900,320982,242505,66725,16205,13495,73991,433653,109168,16653,213990,21822,103080,215449,19332,19353,218639,74551,11861,20224,19335,60440,30877,19324,19338,231279,207704,76688,19345,319642,11853,52187,11841,214952,67398,56298,276952,11842,235…
GO:0003674	molecular_function	molecular_function	2.09e-05	0.00040003	8395	9562	15446	17789	19294,16371,15407,327958,69772,229004,74252,75796,16569,252864,20447,21685,231637,80901,329777,227331,329360,13058,319190,19158,110524,79456,81906,14806,113868,214931,28105,214579,16565,213208,320795,13400,20403,320452,14269,19079,19645,268860,75812,21898,20533,100312473,71228,67040,16939,66634,104215,14058,78925,14233,79464,66922,17301,75452,70750,20287,20479,101869,13388,230162,209737,544971,32…
GO:0005525	GTP binding	molecular_function	2.32e-05	0.00044102	211	9562	325	17789	231932,56327,347722,19354,70359,68328,17857,14468,240327,212539,100039796,68203,100702,11843,226982,18951,104886,52065,56795,19744,75985,71966,225594,69237,80837,245240,109905,224624,19376,17274,216439,66067,68365,69908,19106,442827,74734,11891,270192,19344,19342,12540,667214,320806,19416,81003,13429,665155,11566,72065,69581,18952,432555,76074,14670,16145,217151,75869,24067,20130,67286,403178,237…
GO:0005326	neurotransmitter transporter activity	molecular_function	4.11e-05	0.00076347	20	9562	21	17789	3.81884e+108
GO:0005328	neurotransmitter:sodium symporter activity	molecular_function	4.11e-05	0.00076347	20	9562	21	17789	5.67742e+108
GO:0016879	ligase activity, forming carbon-nitrogen bonds	molecular_function	6.17e-05	0.0011292	53	9562	69	17789	270685,72106,72137,66894,14645,94253,68350,66156,28000,100763,63958,14450,14854,207304,59026,19647,225164,117146,209462,14629,269700,217558,11566,108156,226098,22215,22200,55936,83814,140630,15204,229487,266744,140629,229363,73998,67138,67588,329152,16396,76608,77853,17999,70396,68497,14897,12211,56424,107568,70790,66313,75788,19373
GO:0046914	transition metal ion binding	molecular_function	7.7e-05	0.0013933	581	9562	974	17789	13090,232679,503610,26423,21399,106025,100045778,214162,50849,671564,110115,666168,208285,110147,70073,72774,56448,11487,27008,22031,213019,17381,66724,83557,50817,223455,634386,12870,229603,77371,66622,170716,22032,66112,70294,108946,330627,17158,13097,56353,12642,320997,77604,234736,545288,17246,19212,319653,11489,70605,235293,22051,320040,67966,71891,68795,67525,13528,17387,239337,234847,94352…
GO:0019199	transmembrane receptor protein kinase activity	molecular_function	0.0001282	0.0020938	18	9562	19	17789	2.18121e+90
GO:0016758	transferase activity, transferring hexosyl groups	molecular_function	0.00013698	0.002216	82	9562	116	17789	93961,394434,14755,320438,102637973,218476,14936,394430,654821,68292,330671,17309,14344,14347,320011,72297,14537,14538,215493,108105,320302,217664,103963,14345,394435,100727,14343,78923,243085,72727,76898,171167,234356,110417,217734,16430,80908,67574,74241,68273,99011,26878,14348,53625,26877,66435,17308,67556,67292,71001,22236,272411,230801,100910,208624,613123,233781,103534,94284,269941,78752,14…
GO:0008375	acetylglucosaminyltransferase activity	molecular_function	0.00016674	0.0026719	14	9562	14	17789	2.18476e+75
GO:0019783	small conjugating protein-specific protease activity	molecular_function	0.0001845	0.0029424	50	9562	66	17789	75083,74256,237898,78787,216825,381944,84092,72344,170822,57775,56207,100756,22223,235323,236733,13531,224836,54651,216835,319651,99526,69727,252870,83563,14479,59025,30941,231915,244144,53376,104416,74996,17847,22258,74270,74112,235441,22224,24110,22284,76179,72607,227334,30940,170707,71472,22217,329908,77593,112694759
GO:0022843	voltage-gated cation channel activity	molecular_function	0.00019363	0.0030735	30	9562	36	17789	2.02652e+152
GO:0008081	phosphoric diester hydrolase activity	molecular_function	0.00022474	0.0035011	40	9562	51	17789	###############################################################################################################################################################################################################################################################
GO:0008047	enzyme activator activity	molecular_function	0.00032161	0.0049643	41	9562	53	17789	380711,213990,244668,216963,217692,77038,98366,78618,29875,140500,319618,15463,22084,544963,212285,54189,99326,211914,13196,70314,74206,231801,226407,56784,69710,404710,26431,241694,228850,12570,20469,216439,12569,66251,228998,268390,110279,347722,216991,19387,110854
GO:0016887	ATPase activity	molecular_function	0.00046441	0.0067067	76	9562	109	17789	381338,27409,224079,66887,381290,27410,18669,13417,244562,12144,20437,21354,27404,19299,74610,11304,11944,74591,268379,11941,67972,269400,18671,56199,100019,237806,13411,20928,26357,110082,67126,27061,12780,11666,22427,21969,13871,381072,14885,27406,73834,224742,320209,224088,67470,268878,11307,74142,11303,244421,237911,224814,74104,21974,192663,17250,26874,27421,19687,27405,56087,12638,69926,274…
GO:0016741	transferase activity, transferring one-carbon groups	molecular_function	0.00049679	0.0070535	79	9562	114	17789	212728,554292,98685,14056,59035,14055,70152,238505,240879,12846,69606,74157,17314,229780,116940,30949,74729,69740,75284,210529,216188,71449,319582,319263,100609,22171,15547,74455,212528,109245,78890,78796,18537,56335,28114,67493,27374,72181,64707,70918,76781,110147,22017,56095,52535,79565,108147,239122,231803,75894,18416,68043,14450,20937,15468,668178,18113,106014251,329504,235626,66138,14792,106…
GO:0008138	protein tyrosine/serine/threonine phosphatase activity	molecular_function	0.00050494	0.0071391	36	9562	46	17789	###############################################################################################################################################################################################################################################################
GO:0005231	excitatory extracellular ligand-gated ion channel activity	molecular_function	0.00060762	0.008555	23	9562	27	17789	1.48141e+118
GO:0008168	methyltransferase activity	molecular_function	0.00068976	0.0095517	73	9562	105	17789	75284,69740,210529,100609,71449,319582,319263,22171,98685,14056,59035,212728,554292,238505,240879,12846,14055,70152,74157,229780,116940,17314,74729,30949,67493,27374,28114,22017,110147,64707,70918,72181,76781,52535,56095,79565,15547,74455,109245,78890,78796,212528,18537,56335,15468,68043,20937,329504,18113,668178,106014251,14792,235626,66138,106338,239122,231803,75894,67667,208266,71664,791260,69…
GO:0005086	ARF guanyl-nucleotide exchange factor activity	molecular_function	0.00070892	0.0096972	15	9562	16	17789	1.91575e+81
GO:0008237	metallopeptidase activity	molecular_function	0.00075694	0.010271	105	9562	158	17789	11500,11489,235130,17395,17385,17386,27390,271127,216725,27377,11502,23792,72061,78933,23948,237553,214766,56264,17389,12876,329093,13599,30800,12153,223838,30806,75805,270669,11497,13809,70478,18675,11501,115490424,80898,77794,231093,17388,108154,17288,11488,114896,24087,240028,208936,239337,17394,17387,11490,11491,280668,11496,234847,107522,58860,108657,239833,17391,244071,11421,237360,230857,6…
GO:0016874	ligase activity	molecular_function	0.0008432	0.011395	97	9562	145	17789	270685,72106,72137,381314,68350,14450,28000,63958,20226,244141,19647,225164,269700,209462,16882,11566,22202,217558,102436,55936,15204,70223,70120,69955,73998,140629,266744,107271,69372,329152,67138,74153,67588,66590,70396,17999,76608,16396,14287,382137,71807,97541,66894,14645,319583,94253,66156,226539,14854,22201,100763,68915,27267,117146,207304,59026,107476,110960,23874,14629,108156,72946,22215,…
GO:0004713	protein tyrosine kinase activity	molecular_function	0.0010691	0.014182	11	9562	11	17789	1.38672e+54
GO:0005539	glycosaminoglycan binding	molecular_function	0.0010773	0.014182	17	9562	19	17789	1.30047e+87
GO:0015116	sulfate transmembrane transporter activity	molecular_function	0.0010789	0.014182	11	9562	11	17789	1.35212e+61
GO:0032403	protein complex binding	molecular_function	0.0011345	0.014798	26	9562	32	17789	1.63701e+135
GO:0016817	hydrolase activity, acting on acid anhydrides	molecular_function	0.0011346	0.014798	227	9562	368	17789	13211,240255,217265,22596,74691,24015,20174,70737,67398,217262,53857,16573,11306,17921,56298,329421,17910,14683,246177,19300,72162,239273,52563,74776,75050,27407,27416,56087,26874,14676,109151,17250,230073,71715,17216,74104,360013,240960,224814,668880,16582,16576,67414,244421,22153,237911,16554,19348,74142,11307,71924,208144,11303,14469,77579,14681,107932,19704,73834,231646,217207,14677,14885,165…
GO:0017111	nucleoside-triphosphatase activity	molecular_function	0.0012556	0.016251	210	9562	339	17789	16570,18671,109242,101437,16581,229898,13411,14674,16552,100019,71602,16564,338367,268379,16553,383592,319991,26357,74006,13207,56427,11666,27061,286942,269152,70218,12144,13417,244562,27410,21354,27404,16561,109168,22143,66887,668303,224079,17912,14686,74591,229900,17886,217946,71819,170731,103967,73991,14680,16578,270163,11304,27416,56087,75050,27407,72162,239273,52563,71715,17216,14676,26874,1…
GO:0004725	protein tyrosine phosphatase activity	molecular_function	0.0014034	0.017889	37	9562	49	17789	1.92602e+188
GO:0016788	hydrolase activity, acting on ester bonds	molecular_function	0.0015466	0.019566	225	9562	366	17789	97827,52504,330260,50917,19255,14120,29863,271844,101744,78600,56405,102238433,218461,269615,56629,319520,18583,18795,18968,72043,72102,229776,68915,545622,19259,104831,104806,114875,104015,232889,433022,74182,66350,79202,22321,83493,54611,11432,100037283,74455,545902,18575,245857,19277,71584,100040244,19249,19266,19011,18576,69694,66610,27029,241624,240725,403178,105148,76571,13537,224860,102436…
GO:0016462	pyrophosphatase activity	molecular_function	0.0018252	0.022664	213	9562	346	17789	16562,69192,22151,12638,17920,69926,110084,14687,74376,27421,244281,27405,19687,22154,192663,381293,56505,17857,14468,68178,56325,216877,72960,22145,67951,110350,100702,320707,16574,224742,208084,27406,71960,76074,64340,16568,21969,13871,16569,16560,21974,66196,73804,14675,381917,268878,13429,320209,224088,16572,67470,237806,208943,17913,269400,67972,56199,16551,26570,11941,93838,72831,209737,674…
GO:0004930	G-protein coupled receptor activity	molecular_function	0.0019889	0.024379	487	9562	830	17789	54199,171228,226304,231589,546964,574402,171242,171273,20605,627111,171241,108073,64095,237716,12771,230777,14763,669149,14062,637004,668727,80901,171256,14761,171195,19214,11542,330814,171274,22314,113856,224582,15557,224572,628422,15558,319293,637908,667180,22312,241263,64378,171258,11536,627537,171272,16995,58861,21336,13618,18441,233081,675969,211578,113846,100042591,18390,14608,665376,319387…
GO:0004143	diacylglycerol kinase activity	molecular_function	0.0019924	0.024379	10	9562	10	17789	5.60771e+57
GO:0016818	hydrolase activity, acting on acid anhydrides, in phosphorus-containing anhydrides	molecular_function	0.0021473	0.02618	220	9562	359	17789	224742,208084,27406,71960,16569,13871,21969,16568,64340,76074,73804,66196,21974,16560,381917,14675,13429,268878,67470,16572,224088,320209,69192,22151,16562,74376,14687,69926,17920,110084,12638,27405,244281,19687,27421,192663,22154,216877,20585,56325,93761,68178,56505,381293,14468,17857,67951,22145,72960,110350,16574,320707,100702,14685,17925,20437,18669,381290,14673,238463,17909,56200,27409,38133…
GO:0042623	ATPase activity, coupled	molecular_function	0.0022668	0.027538	46	9562	64	17789	66887,22427,381338,13871,21969,73834,21354,20437,18669,244562,381290,14885,12144,74142,11944,19299,320209,74610,21974,74104,224814,244421,237911,26874,17250,11941,19687,27421,239273,27416,67972,269400,12638,56199,18671,20928,11306,320707,19300,12780,27061,11666,56325,72960,67126,22596
GO:0004222	metalloendopeptidase activity	molecular_function	0.0029973	0.036022	78	9562	117	17789	17389,13599,11502,27377,214766,23948,23792,271127,27390,17385,17386,216725,235130,11489,17395,11500,17394,11490,11491,17387,239337,208936,107522,58860,234847,280668,11496,11488,108154,17388,17288,24087,114896,18675,70478,11501,77794,115490424,30806,223838,12153,30800,11497,270669,75805,224697,215095,17380,240047,101401,384806,216119,240913,230709,58223,23794,230857,237360,240322,229595,68876,1739…
GO:0031683	G-protein beta/gamma-subunit complex binding	molecular_function	0.0030257	0.03617	15	9562	17	17789	1.46871e+74
GO:0016706	oxidoreductase activity, acting on paired donors, with incorporation or reduction of molecular oxygen, 2-oxoglutarate as one donor, and incorporation of one atom each of oxygen into both donors	molecular_function	0.0037189	0.043731	9	9562	9	17789	7.56053e+47
GO:1901682	sulfur compound transmembrane transporter activity	molecular_function	0.0037961	0.0442	12	9562	13	17789	2.68512e+67
GO:0004114	3',5'-cyclic-nucleotide phosphodiesterase activity	molecular_function	0.0038558	0.044587	19	9562	23	17789	2.18461e+101
26462,20728,12477,66860,11820,23805,226470,57266,78251,20022,14261,15983,22411,76688,209018,11492,12330,233902,209131,20692,13797,232989,246228,74649,76251,13119,100042555,12478,73748,13710,11652,230558,16581,67471,16492,16570,100504263,381390,70560,17258,94089,74918,208666,227929,170935,213084,19346,74998,17248,269610,380614,11908,22371,269037,53970,21969,24069,71950,11566,436240,14367,29816,740…
4204,11717,18424,22321,58235,215351,80283,100126765,100683,18479,59040,21350,52585,79459,269224,212517,237847,52331,94040,232984,26457,70605,381110,171429,13211,19718,50790,56741,100503895,70527,100861668,108797,545288,234736,56774,16490,80708,54613,16010,20445,22342,19395,51791,70911,107934,22031,14569,50935,18021,26932,13690,54150,67610,54004,56460,243085,22329,21678,319767,50875,83428,22283,21…

## Sheet: HypoTH+T3vsControl
GO_accession	Description	Term_type	Over_represented_pValue	Corrected_pValue	CAD_item	CAD_list	Bg_item	Bg_list	Gene_names
GO:0044763	single-organism cellular process	biological_process	7.35e-55	8.24e-52	2663	12456	3294	17789	353235,19401,20495,80885,20540,628422,75292,11957,93881,171191,192161,140919,545934,331374,13488,80910,103573,217371,328778,113852,404710,381489,240505,57138,235626,12292,16485,17131,108052,14683,236149,433899,73173,235442,435864,14453,16995,26382,22413,22333,211578,68566,68089,65257,72323,70355,110877,52864,330790,277328,12032,16504,20399,74030,217866,19335,69129,58207,408058,67064,56395,171262,…
GO:0050789	regulation of biological process	biological_process	1e-43	6.76e-41	2424	12456	3024	17789	76206,102635315,72699,12576,15564,234353,56811,16478,226652,107889,68526,53970,80794,13618,319239,14390,219150,72536,171189,226525,93689,110596,22296,70392,17203,11858,380711,14428,20186,15205,22408,12273,12364,51791,22412,76365,17933,110197,54140,71059,18383,245572,64143,78619,17878,666085,81703,11551,19354,408065,71972,233490,52837,71111,16918,14704,74237,58202,14767,78514,22422,665210,72065,10…
GO:0065007	biological regulation	biological_process	3.36e-43	1.88e-40	2460	12456	3075	17789	665210,22422,78514,216445,100642166,72065,71972,52837,233490,71111,16918,408065,11551,81703,19354,666085,14767,58202,74237,14704,14238,84111,56222,100043914,384281,17927,11856,233445,75430,60532,17979,14011,14678,17928,14700,100316903,18996,268973,22411,224691,545471,72139,13845,17937,57230,68010,171189,226525,14390,219150,72536,319239,13618,80794,53970,70392,22296,110596,93689,12576,15564,72699,…
GO:0050794	regulation of cellular process	biological_process	4.91e-43	2.36e-40	2397	12456	2991	17789	100972,17536,19664,384221,75668,381812,53382,20607,18771,216749,672125,76229,14680,215798,14829,67412,18584,21897,18761,320858,50796,171469,619310,224572,269615,195531,233046,50875,15378,76108,104349,69930,21338,94214,171265,67844,208691,665376,114142,17210,244701,50493,627569,67042,233056,319939,68939,626832,19329,231724,210105,384522,19411,623459,245666,56193,224582,380855,21389,545909,12209,67…
GO:0044699	single-organism process	biological_process	5.47e-34	1.84e-31	2994	12456	3852	17789	228850,320484,66468,54393,236293,56843,228543,11435,384219,66311,70099,21354,74446,93706,69993,11550,22335,668727,74194,16500,12889,65246,97998,18053,381269,12362,54519,69926,18753,56485,27058,239081,226844,21973,93876,625068,18400,75396,20521,19348,234915,24060,330064,213053,13865,20394,17202,21844,140492,230612,64297,76376,14369,14701,107831,11984,11988,18166,12371,330836,11441,53319,67028,2358…
GO:0051716	cellular response to stimulus	biological_process	9.12e-34	2.79e-31	1491	12456	1824	17789	17773,238252,211949,232962,70762,83397,252909,15562,14536,234130,59021,434117,239027,22084,574402,81016,113848,54598,232201,12777,56784,14525,12802,109294,17082,78889,15551,227622,632793,320634,11513,21337,14765,12500,19355,114716,243270,14707,72754,24088,22337,234258,14699,19731,17685,171194,244867,18217,23957,19414,18387,98710,72469,22306,18845,243277,113846,113851,74018,58996,22354,171236,1861…
GO:0007154	cell communication	biological_process	1.03e-32	2.9e-30	1443	12456	1765	17789	18576,19769,19888,70771,113854,85030,218772,113864,64337,104215,69632,64450,12769,246313,321019,19344,18751,14788,11553,53868,636731,19338,100043318,70433,14064,14685,13844,23805,238276,14674,16443,214804,233222,226278,18762,223254,110789,330581,21687,19217,20608,100764,20541,13877,628185,71704,19216,20851,207212,20848,18796,243621,24064,328759,19328,13867,171235,353346,68708,270118,319430,19159,…
GO:0023052	signaling	biological_process	1.74e-32	4.5e-30	1440	12456	1762	17789	627479,52504,212539,216344,319430,259302,19159,270118,11539,171271,245038,110135,21770,66725,30942,114715,81006,110784,404289,12767,171239,20608,100764,628185,13877,71704,110789,223254,330581,21687,19217,207212,24064,243621,20848,18796,13867,19328,328759,353346,68708,171235,19216,20851,70433,14064,14685,13844,11553,100043318,19338,636731,53868,14674,16443,226278,233222,214804,18762,23805,238276,8…
GO:0044700	single organism signaling	biological_process	2.42e-32	5.81e-30	1435	12456	1756	17789	21338,80837,171265,94214,76877,171263,22260,77596,14065,14709,67844,171272,100042591,269615,19204,224572,76108,233046,15378,217692,239336,13998,14680,215798,18584,21897,18761,14829,243407,171469,17199,100972,100503710,75668,58200,384221,230098,20607,216749,381812,20182,171190,672125,12922,76229,20183,20692,545909,12209,99371,53901,69159,53869,245666,241694,56193,12169,224582,544963,22025,14289,19…
GO:0050896	response to stimulus	biological_process	1.1e-31	2.3e-29	1743	12456	2169	17789	94212,14963,239845,12057,216831,69017,16988,15040,66131,271457,319217,69721,15566,338371,66508,56468,384534,22423,331461,67169,233080,217143,637908,70784,14270,17193,497114,14823,14371,18518,18577,19016,434016,227333,627191,11735,98417,19214,54712,99439,630294,53902,140795,17130,252904,13838,12765,114713,11556,19334,17314,72585,217166,71729,16182,69903,107338,20469,434110,26423,12774,15559,545798…
GO:0007165	signal transduction	biological_process	1.91e-31	3.77e-29	1423	12456	1744	17789	171241,71085,268970,22259,14710,632671,14783,229357,19766,78255,252905,15461,16800,14427,13609,276952,233071,71746,171257,171184,14652,627280,353187,73728,19353,71544,54409,12772,18752,16449,217944,171188,107934,23796,13983,114875,93735,83771,59289,235712,23965,245424,12766,381413,20662,19325,56212,240239,171211,171207,54354,171229,93690,100042848,93834,75985,26381,12267,625823,14083,223435,17125…
GO:0051179	localization	biological_process	1.82e-27	3.41e-25	959	12456	1150	17789	19385,16532,68137,17876,67126,12460,64335,67498,12790,110935,63959,14408,12856,171405,241919,54403,108652,234076,245128,66676,22320,16494,80879,66147,30805,70349,56488,66500,108907,66371,53330,216892,14409,208169,20525,22782,69806,239436,67547,380683,241612,27411,22626,329954,16519,12757,229699,105243,66043,73122,77577,75266,26373,72401,16539,73658,194352,71279,12788,27421,12289,16515,16512,26887…
GO:0035556	intracellular signal transduction	biological_process	7.09e-27	1.26e-24	412	12456	455	17789	54607,140743,22325,208372,269437,72318,110279,277854,227624,381112,26934,117590,99326,232227,57257,69299,226970,17274,104886,67295,17532,12229,232441,69581,66922,20130,23921,216439,56382,242681,101497,21682,11854,24012,232237,19337,117589,19332,18711,18797,74646,80718,227377,18755,11512,19342,67605,234094,20663,263406,69908,195208,16653,18176,19345,328967,211896,67296,170758,142687,226421,101540,…
GO:0051234	establishment of localization	biological_process	4.96e-26	7.59e-24	938	12456	1128	17789	79554,56379,69089,74104,16493,12724,110862,68953,102339,230810,74043,103694,55961,16535,20502,26372,252903,20501,20528,226025,236794,57014,11774,66113,76713,243616,20813,27413,13487,214922,504186,67105,77706,28254,20510,101488,66269,51801,268345,230673,242151,12789,228960,217337,237213,69608,278679,380728,74166,20516,67602,216810,16439,16004,26874,240595,235504,240638,70784,106489,22785,381884,19…
GO:0006810	transport	biological_process	5.68e-26	8.31e-24	934	12456	1123	17789	67300,67753,241118,215113,18173,11989,17339,66384,14603,224674,76856,16510,80979,106073,72413,171209,106039,56774,13340,108115,14405,108116,18821,11765,66733,56517,18174,240444,67843,16534,217721,14394,68775,22784,16491,11447,14397,108015,229706,94281,71699,11946,67366,216871,11830,30962,110876,20535,11816,56334,70701,16650,226432,56440,11870,110172,20912,328563,11833,56017,20335,20512,20504,1728…
GO:0044765	single-organism transport	biological_process	5.58e-23	7.22e-21	795	12456	953	17789	16500,211468,142681,65246,228545,12889,109280,99738,74446,666348,20276,22335,192775,11435,53612,244562,73102,15247,20191,21354,224814,109815,18439,11966,11964,238799,215723,236293,56843,67398,18436,110880,58176,20521,107371,24060,108956,330064,16521,20539,213053,72175,18400,14407,56188,56485,240215,27058,110891,226844,11979,381269,140494,353169,94229,319848,269356,53881,53413,229593,27060,14395,1…
GO:0043412	macromolecule modification	biological_process	9.11e-17	5.68e-15	853	12456	1056	17789	108105,19276,16179,320139,545926,72349,56527,105675,69181,20868,270672,243659,226419,11352,28000,93843,12914,244631,27374,26877,103236,84092,77485,26396,384701,51789,276846,78787,20451,97440,56294,236574,18160,21813,240892,12168,269954,20112,14917,606496,66461,22174,279561,67121,29869,18004,20454,19268,237930,17295,75770,14360,19277,74145,140859,211770,242726,30940,20452,12236,110651,18749,231637…
GO:0006468	protein phosphorylation	biological_process	9.93e-17	6.08e-15	511	12456	607	17789	83813,545929,17096,104318,22115,71742,12166,13866,16798,13839,18755,27373,50883,381390,19134,26400,18769,52163,19108,26362,26413,15258,19713,231876,21682,628475,11482,237459,269774,382253,238323,12229,20871,26404,435766,268930,26559,208583,13848,19092,110279,331401,12995,11350,14158,58988,26410,263803,270190,16150,216976,18747,117229,69635,20869,13837,73707,23920,333050,19229,12568,59125,26398,11…
GO:0007264	small GTPase mediated signal transduction	biological_process	1.84e-16	1.07e-14	255	12456	283	17789	56349,207212,19341,75547,19731,74055,243621,233328,270160,213990,19328,68708,64143,214952,72754,271457,75668,19700,67653,76338,69721,230098,11858,19324,106572,100972,380711,73341,19339,71704,268480,223254,320292,109294,70784,19335,68895,74563,381812,66725,23912,76877,80837,11852,56784,22084,67844,30938,56508,270192,71966,110596,226422,76108,212539,233046,59021,242505,216344,19334,19159,13998,2638…
GO:0006464	cellular protein modification process	biological_process	2.17e-16	1.22e-14	826	12456	1022	17789	245038,140810,16885,19253,26448,72351,12978,11652,381921,234878,24018,73542,329509,328417,108079,11682,13853,66725,68292,266632,13924,22137,26403,78334,56274,110147,59035,21687,224836,238564,78943,264064,14186,67556,17169,231727,19216,72508,18761,101320,214230,19035,22165,13867,16451,16202,24013,215303,13631,108737,12169,19259,26412,235323,209012,13844,329777,17279,19106,68943,269881,20873,11872,…
GO:0036211	protein modification process	biological_process	2.17e-16	1.22e-14	826	12456	1022	17789	110542,20442,17152,19279,16706,271981,66435,329908,22217,20963,18211,226751,12325,75083,319953,13835,230735,22612,83560,26397,216965,69737,72137,22200,20623,234854,20815,20872,217866,13841,213452,74568,74256,18213,20014,59025,667663,320119,83984,23955,252864,664831,55984,12988,13649,381113,20459,15259,238831,14773,223723,228005,12167,20878,69171,18712,75292,19246,107589,12747,12566,546071,27392,5…
GO:0006811	ion transport	biological_process	3.75e-14	1.88e-12	391	12456	461	17789	16502,74166,380728,237213,12725,328059,140493,20500,16439,22063,20516,17178,20495,504186,214922,12789,268345,242151,233979,20540,12296,20510,26946,11957,236794,225030,226025,11438,26372,13487,57014,110862,12724,328699,16493,56379,12292,16535,57138,55961,16485,230810,14396,11732,14658,11931,94282,16538,20192,100502876,14403,94279,16506,56315,240776,74915,277328,20505,20264,16504,18301,226781,20529…
GO:0019219	regulation of nucleobase-containing compound metabolic process	biological_process	5.57e-13	2.68e-11	863	12456	1090	17789	103806,14536,102635315,11983,107889,22776,100978,237558,16478,66467,434377,226525,69020,14390,27056,219150,223922,53970,245109,22084,234362,20465,64379,72958,15377,628308,217082,15205,20186,54446,244349,12591,15214,76365,17933,27224,17932,245583,245572,23957,71059,69944,235028,19414,69257,218311,26927,78619,17878,17135,100043042,22337,233490,14461,16918,408065,240057,100041433,81703,20728,233168,…
GO:0006355	regulation of transcription, DNA-dependent	biological_process	1.9e-12	8.87e-11	842	12456	1065	17789	12592,244721,22751,19724,22768,14239,104394,19016,11624,268670,217166,11864,107771,23942,12912,214669,12399,18994,18027,18505,104348,14106,232430,14283,15213,17130,66172,237775,238690,11614,245305,19883,57782,29808,22026,17863,235048,26896,13864,238693,19668,327963,22775,14236,378435,18030,237339,385312,16364,15206,245595,72033,20375,668620,21388,76022,101604,73569,64050,13713,52679,22643,18033,4…
GO:2001141	regulation of RNA biosynthetic process	biological_process	1.9e-12	8.87e-11	842	12456	1065	17789	244556,22260,382019,240590,226049,110784,69930,30942,71591,241944,24132,270118,210503,667666,20674,232854,545913,15218,15378,104349,195531,108961,380850,619310,20851,232853,52712,22061,50796,13876,20848,320858,18584,100303732,22691,20464,14463,331188,320995,626391,20466,18028,321000,22678,18503,20182,18771,18504,19664,235907,17536,74400,13557,54650,56869,381379,382206,100503584,100233208,73430,21…
GO:0051252	regulation of RNA metabolic process	biological_process	2.43e-12	1.07e-10	843	12456	1067	17789	104349,15378,195531,210503,270118,24132,241944,15218,545913,232854,667666,20674,226049,71591,30942,69930,110784,382019,240590,22260,244556,13557,74400,17536,235907,19664,54650,22678,321000,18503,20466,18028,626391,18504,18771,20182,100303732,18584,320858,20848,13876,331188,320995,20464,14463,22691,619310,380850,108961,50796,22061,52712,232853,20851,109889,66410,20024,18986,21389,22025,18032,38211…
GO:0009889	regulation of biosynthetic process	biological_process	4.28e-12	1.8e-10	853	12456	1082	17789	11865,19696,626832,17268,18988,14009,70122,13709,15227,210105,240120,19411,208691,72739,218772,56458,75507,20675,54131,18109,72723,75316,224585,114142,22433,214779,22689,18998,233056,12915,50496,100503353,67370,20183,73181,630836,215031,71163,22717,100043772,12398,235050,57441,73430,211961,100233208,15251,81601,381379,56869,382206,100503584,18986,20024,66410,109889,11909,53422,72128,380855,382118…
GO:0016070	RNA metabolic process	biological_process	4.32e-12	1.8e-10	1085	12456	1396	17789	77652,66590,631002,58202,233490,16918,408065,81703,234219,100642166,382137,17937,21387,57230,71828,14011,100316903,17928,18996,224691,72139,545471,15900,12606,17927,66971,60532,71508,17979,67053,14238,13559,56222,216443,100043914,107889,22776,74469,237558,16478,66467,434377,103806,102635315,66628,69163,245109,245841,219150,14390,223922,53970,15214,17933,76365,21400,20186,15205,17878,78619,67005,1…
GO:0010556	regulation of macromolecule biosynthetic process	biological_process	4.85e-12	1.92e-10	852	12456	1081	17789	74481,666584,17928,100316903,237411,14011,431706,72139,545471,15900,12606,18996,19018,224691,21387,17937,57230,15499,13555,14238,77117,384281,100043914,13559,56222,54352,100039060,17927,384763,71508,16372,17979,22640,408065,233490,16918,14461,81703,100041433,77652,631002,27386,58202,11908,20728,233168,56449,18999,23871,170740,72807,56771,15500,234219,100642166,20852,18022,12014,217082,20186,15205…
GO:0031326	regulation of cellular biosynthetic process	biological_process	4.85e-12	1.92e-10	852	12456	1081	17789	14465,242747,14531,107932,67219,211135,80902,243833,243834,102637366,170763,17870,12608,69256,240034,69792,69821,626316,12395,100041379,27274,75424,332221,18024,14281,22062,665902,65020,385674,59057,240063,230162,56404,67279,319615,14235,77200,100271882,74149,21677,14464,668039,11819,101095,18227,216848,234413,17936,260298,224893,16476,72504,20181,232334,54723,64144,213011,18018,83993,436240,1058…
GO:2000112	regulation of cellular macromolecule biosynthetic process	biological_process	4.85e-12	1.92e-10	852	12456	1081	17789	237411,14011,431706,74481,666584,100316903,17928,18996,19018,224691,72139,545471,15900,12606,17937,21387,57230,15499,14238,13555,13559,56222,384281,77117,100043914,100039060,17927,54352,16372,71508,17979,22640,384763,233490,14461,16918,408065,81703,100041433,20728,233168,631002,77652,27386,58202,11908,56449,170740,23871,18999,56771,72807,234219,15500,100642166,20852,12014,18022,628308,217082,1520…
GO:0010468	regulation of gene expression	biological_process	5.34e-12	2.09e-10	857	12456	1088	17789	29871,78284,433586,21815,408068,13170,15228,66500,54169,14241,73451,20586,229663,626848,434178,268417,14233,210853,56198,226641,22608,22764,381463,381319,272382,17128,14462,80509,328274,210104,74570,71375,57246,100043034,407812,21408,102633750,21679,30051,12753,21834,12355,56484,228876,544922,239652,67235,353208,13685,666311,56632,22431,170936,665913,245525,545938,272347,269610,78251,664987,10004…
GO:0080090	regulation of primary metabolic process	biological_process	9.34e-12	3.46e-10	884	12456	1126	17789	66131,29808,22026,17863,57782,19883,245305,11614,238690,237775,238693,26896,13864,235048,327963,14236,22775,19668,20375,18015,245595,72033,16364,15206,385312,237339,18030,378435,66508,22768,19724,22751,244721,12592,11624,104394,19016,14239,12399,214669,12912,23942,107771,11864,217166,268670,17130,66172,14283,15213,232430,114713,14106,104348,18027,18994,18505,22758,228839,54201,26423,22746,18124,5…
GO:0051171	regulation of nitrogen compound metabolic process	biological_process	1.06e-11	3.86e-10	883	12456	1125	17789	226049,30942,69930,71591,110784,22260,240590,382019,244556,104349,15378,195531,270118,24132,210503,241944,15218,667666,20674,232854,545913,320858,100303732,18584,20848,13876,14463,20464,331188,320995,22691,619310,380850,108961,50796,22061,20851,52712,232853,74400,13557,235907,19664,17536,54650,321000,18503,22678,626391,20466,18028,18771,13688,18504,20182,235050,12398,71163,22717,100043772,20183,7…
GO:0031323	regulation of cellular metabolic process	biological_process	1.11e-11	4.01e-10	894	12456	1140	17789	223922,53970,27056,219150,14390,226525,69020,72958,15377,20465,234362,64379,245109,22084,11983,14536,102635315,103806,66467,434377,16478,107889,22776,100978,237558,19414,71059,23957,69944,235028,78610,245583,245572,17932,22337,100043042,17135,17878,78619,26927,218311,69257,244349,54446,217082,20186,15205,72112,628308,27224,76365,17933,15214,12591,72807,56771,18999,23871,170740,18022,12014,15500,2…
GO:0019222	regulation of metabolic process	biological_process	1.14e-11	4.07e-10	908	12456	1159	17789	22764,381463,272382,381319,80509,328274,17128,14462,268417,14233,56198,210853,22608,226641,13170,408068,29875,15228,66500,54169,14241,626848,434178,20586,73451,229663,78284,29871,433586,21815,12753,30051,12355,21834,228876,56484,544922,239652,21679,74570,71375,57246,407812,100043034,21408,102633750,210104,58801,382030,18612,15375,387131,74670,112694759,22757,100041677,664987,545490,244713,54123,5…
GO:0055085	transmembrane transport	biological_process	2.14e-11	7.58e-10	407	12456	492	17789	63873,338370,228139,12291,22065,16512,20508,12289,24046,207151,11947,17364,18440,66859,21355,114644,11951,231602,11306,94280,170756,57274,20927,16536,11944,14977,11958,12733,382113,16511,73836,233649,11974,12298,110893,77031,72027,277468,26570,66144,20537,20928,56365,12727,16492,67498,76408,74096,16532,67126,17876,216225,110935,53333,17250,12790,212980,64176,20498,234076,140918,108652,30936,17140…
GO:0060255	regulation of macromolecule metabolic process	biological_process	4.87e-11	1.66e-09	876	12456	1120	17789	29871,78284,433586,21815,408068,13170,15228,66500,54169,14241,73451,229663,20586,434178,626848,268417,14233,210853,56198,226641,22608,22764,381463,272382,381319,14462,17128,80509,328274,210104,58801,382030,71375,74570,57246,21408,407812,100043034,102633750,21679,30051,12753,21834,12355,56484,228876,239652,544922,67235,353208,30052,13685,666311,56632,170936,22431,665913,245525,545938,272347,78251,…
GO:0032774	RNA biosynthetic process	biological_process	1.39e-10	4.41e-09	912	12456	1172	17789	15227,240120,19411,210105,626832,192657,17268,18988,19696,11865,13709,14009,70122,18998,214779,22689,22433,114142,50496,12915,233056,75507,20020,20675,56458,72739,218772,224585,75316,72723,18109,54131,81601,15251,100233208,73430,211961,100503584,382206,381379,56869,630836,215031,20183,73181,67370,100503353,235050,12398,100043772,22717,71163,72128,53422,11909,22025,21389,18032,382118,380855,20024,…
GO:0006351	transcription, DNA-dependent	biological_process	1.74e-10	5.48e-09	910	12456	1170	17789	212276,67985,12013,13661,56296,381549,19885,73233,233057,18519,170938,112422,12394,21343,60611,432770,13999,18142,235047,20847,72667,53417,17342,432769,433804,13716,55994,73610,56501,21781,19014,67486,330361,59024,71137,53314,73229,13982,14282,17125,18991,23872,353282,54678,77044,620419,100040944,12609,100043381,110794,54139,26386,74120,209446,22712,192231,99334,319758,108655,213389,208595,19698,…
GO:0016192	vesicle-mediated transport	biological_process	4.77e-10	1.47e-08	110	12456	118	17789	212986,20333,50797,11765,11771,66226,70349,56216,53611,13047,11775,100226,22319,238123,18196,66147,22320,71770,53612,67300,74190,67753,56395,105504,22318,11764,22317,106039,228545,106489,73122,20912,53331,260302,77573,277978,13852,20288,71169,68566,53330,54160,245828,66964,12757,74325,107371,68159,68338,74732,68416,74463,11774,20908,58244,226744,77371,11776,66712,72772,27054,211446,11766,69596,76…
GO:0051056	regulation of small GTPase mediated signal transduction	biological_process	6.96e-10	2.06e-08	93	12456	98	17789	236915,50753,16443,99371,16801,381112,19157,99326,74018,73728,57257,232227,226970,241694,71972,224014,22325,245666,72318,110279,442801,16800,328967,380698,235633,107338,21844,19158,69632,52666,234094,20469,20663,263406,19418,102075,269608,227377,74002,213783,101497,24001,232237,622434,30938,22084,268739,277360,19417,20403,110596,17207,22324,56784,54324,213522,19159,13998,26382,234353,217692,53972…
GO:0009100	glycoprotein metabolic process	biological_process	1.77e-09	5.02e-08	72	12456	74	17789	320011,20442,20440,20452,56219,53625,20448,68273,272411,11546,26878,66435,20454,328417,59007,93961,20445,20450,11871,54613,68292,11870,109979,16430,14347,17308,20447,235587,17309,58193,20014,20443,20446,26879,231727,14348,73379,50935,240119,103963,14042,217734,117592,329777,54218,108105,11872,109978,72297,171167,20441,54616,26938,20444,225742,20451,97440,227327,14345,73068,380959,13200,20449,9788…
GO:0009101	glycoprotein biosynthetic process	biological_process	2.46e-09	6.9e-08	71	12456	73	17789	54613,11870,68292,20450,20445,11871,20454,93961,328417,272411,11546,66435,26878,20448,68273,56219,53625,320011,20452,20440,20442,103963,240119,50935,231727,14348,73379,20446,20443,26879,58193,20014,17309,235587,20447,16430,109979,17308,14347,171167,26938,54616,20441,109978,72297,11872,108105,54218,329777,117592,217734,14042,241230,102637973,11545,99011,232984,11875,26877,14043,97884,13200,20449,7…
GO:0042221	response to chemical stimulus	biological_process	4.38e-09	1.21e-07	87	12456	92	17789	22025,20181,380701,19401,353187,14815,13983,70433,330485,641376,77996,19885,26424,22044,20183,17127,67473,11835,22259,140742,17125,68010,15370,18440,228139,218772,26379,19411,14683,23958,55994,17131,67675,67605,75747,26423,13865,26380,207565,19015,231602,13982,18124,217166,17129,225998,58245,21907,15378,18667,18438,17130,230784,14536,21833,22260,19016,17128,381463,11603,30942,50518,110784,18171,1…
GO:0007155	cell adhesion	biological_process	5.07e-09	1.38e-07	170	12456	194	17789	13505,12561,216033,93717,22329,12937,12556,54216,12560,12550,21827,11595,219228,12565,93706,12385,16774,16769,21826,192163,93713,12942,16773,13510,12819,12845,20750,279653,93707,13004,93705,12554,21825,16775,18530,225256,12484,18526,17123,93876,23836,12614,93708,93887,12386,12552,93714,12505,353236,93886,320865,12558,12557,12555,65945,93722,12564,192164,21683,353234,22295,93723,93891,232370,12562…
GO:0022610	biological adhesion	biological_process	5.07e-09	1.38e-07	170	12456	194	17789	73173,268663,100534287,93716,93892,192188,14107,93889,245578,16776,105298,12504,93879,211924,239096,93883,69398,18074,21828,93704,93724,18081,245827,192161,219257,53601,13511,93715,93873,93890,227485,13003,93882,93881,93888,93701,54366,353235,93875,329628,12941,93712,93709,94212,104010,53883,13507,353237,13506,192187,239833,238939,12822,12032,16772,22330,330790,67666,11994,93699,18073,320873,3814…
GO:0006508	proteolysis	biological_process	9.11e-09	2.45e-07	473	12456	592	17789	19164,20437,208117,30940,22223,12751,30806,210622,117066,70008,71753,242711,13599,19359,22072,73481,329908,100040208,22217,18675,229697,75083,21892,12874,12876,11504,12263,56464,271813,330119,17391,64139,13036,384806,11490,71791,319875,110751,58860,56373,11489,18791,73677,17224,69540,74256,12333,75002,27390,78309,16613,56094,214639,19165,12338,59025,230857,17390,76976,328780,230908,83563,14939,11…
GO:0006486	protein glycosylation	biological_process	1.28e-08	3.28e-07	66	12456	68	17789	20014,26879,20443,20446,17308,14347,109979,16430,20447,235587,17309,50935,240119,103963,73379,14348,231727,68273,20448,26878,66435,11546,272411,20442,20452,20440,320011,53625,68292,11870,54613,328417,93961,20454,11871,20445,20450,380959,227327,14345,73068,20449,13200,225742,20444,97440,20451,99011,232984,102637973,11545,241230,97884,26877,11875,329777,54218,217734,117592,72297,109978,20441,26938,…
GO:0043413	macromolecule glycosylation	biological_process	1.28e-08	3.28e-07	66	12456	68	17789	73379,14348,231727,50935,240119,103963,17308,14347,109979,16430,20447,235587,17309,20014,26879,20443,20446,328417,93961,20454,11871,20450,20445,68292,11870,54613,20442,20440,20452,320011,53625,68273,20448,26878,66435,11546,272411,97884,11875,26877,232984,99011,11545,102637973,241230,225742,20444,97440,20451,380959,227327,73068,14345,20449,13200,108105,11872,72297,109978,20441,26938,171167,217734,…
GO:0070085	glycosylation	biological_process	1.28e-08	3.28e-07	66	12456	68	17789	108105,11872,109978,72297,171167,26938,20441,217734,117592,54218,329777,97884,11875,26877,99011,232984,241230,102637973,11545,20444,225742,20451,97440,14345,73068,227327,380959,13200,20449,20454,93961,328417,20445,20450,11871,54613,11870,68292,320011,20442,20440,20452,53625,20448,68273,11546,272411,66435,26878,14348,231727,73379,240119,50935,103963,16430,109979,14347,17308,17309,235587,20447,2001…
GO:0007265	Ras protein signal transduction	biological_process	2e-08	5.03e-07	82	12456	87	17789	234353,26382,53972,13605,545156,19159,13998,219140,110596,20403,30938,268739,19417,277360,22324,213522,54324,17207,20662,102098,14163,223254,213498,109294,230972,73341,109904,71704,230098,54126,72754,211673,213649,215632,109934,56349,207212,75547,223435,77669,243621,74018,73728,232227,57257,226970,381112,19157,22325,245666,72318,110279,224014,71972,50753,236915,16801,16443,99371,74002,213783,2696…
GO:0046578	regulation of Ras protein signal transduction	biological_process	2e-08	5.03e-07	82	12456	87	17789	69632,52666,19158,234094,20663,107338,235633,21844,19418,263406,16800,442801,380698,328967,24001,101497,232237,622434,269608,227377,102075,74002,213783,16443,99371,16801,236915,50753,224014,71972,72318,110279,245666,22325,381112,19157,226970,74018,232227,73728,57257,223435,77669,243621,56349,207212,75547,215632,213649,109934,211673,72754,54126,230098,73341,71704,109904,230972,213498,223254,109294…
GO:0006629	lipid metabolic process	biological_process	4.6e-08	1.09e-06	164	12456	189	17789	94224,12642,101055671,18717,93732,106529,18720,71365,30049,381334,320951,224860,108657,15492,27392,60527,19210,11430,18701,231871,72469,14466,101502,80911,18194,20249,276846,18799,14420,27388,114663,233552,628236,338521,381236,56690,109791,16890,241274,67452,18798,433091,15107,271844,15496,403178,242291,269060,107476,74182,66569,269615,100041596,78390,74121,15493,215615,75772,76267,116939,13595,2…
GO:0006793	phosphorus metabolic process	biological_process	6.67e-08	1.54e-06	777	12456	1009	17789	50932,18212,12571,102414,622474,100043638,217410,23954,320484,27220,227733,11964,11966,77976,27389,329502,69131,353204,110074,18641,18607,213084,244418,11481,78928,106763,14183,19263,19886,218699,12748,16428,26918,18753,13144,24000,230809,545156,228012,12361,244895,224105,19091,67333,665113,11565,19139,18479,72084,26414,105278,14184,67446,620736,18099,12649,244859,11477,72102,245269,433486,117150…
GO:0006796	phosphate-containing compound metabolic process	biological_process	6.67e-08	1.54e-06	777	12456	1009	17789	68082,71742,73610,103850,67603,545929,75456,13839,19250,19108,18711,381390,19134,27373,218232,15258,26413,382253,269774,80915,99712,237523,18938,268930,20871,435766,18218,19092,73547,13848,217837,11958,19262,19271,331401,12995,110279,171567,23920,69635,263803,26410,241062,60596,270190,11350,226896,26398,432530,12568,328329,11302,212862,70325,101055864,20817,57740,226265,29807,66691,271697,101568,…
GO:0016310	phosphorylation	biological_process	7.28e-08	1.65e-06	550	12456	701	17789	279029,329421,13807,237300,14772,381937,11479,12750,12305,15257,105787,20620,67184,18647,13666,235344,545814,232533,71091,22390,53859,70762,54721,16590,11836,70415,69562,13000,70661,69922,231580,16452,71481,14254,227541,26415,26395,192292,56489,72112,230103,109880,213326,72388,56532,12143,100043645,20393,13728,16337,14191,58864,17289,108960,17179,66152,58231,26921,19882,27263,53886,56504,11651,22…
GO:0010033	response to organic substance	biological_process	1.2e-07	2.67e-06	76	12456	81	17789	12355,21834,18227,13864,23957,11819,19013,18439,26381,18436,22337,22026,19883,11604,11614,20186,66508,17126,20182,94045,18171,11603,381463,30942,50518,110784,19016,17128,21833,22260,18438,17130,14536,18667,15378,225998,58245,21907,217166,17129,26423,13865,26380,207565,18124,231602,19015,13982,67605,17131,14683,19411,23958,55994,218772,26379,228139,68010,15370,18440,22259,11835,17125,26424,22044,2…
GO:0014070	response to organic cyclic compound	biological_process	1.76e-07	3.87e-06	58	12456	60	17789	19883,22026,22337,23958,11614,19411,26381,13982,231602,18124,18439,19013,19015,207565,26380,23957,11819,13864,13865,26423,21834,18227,12355,18436,18440,20182,94045,15370,22259,11835,18171,26379,218772,228139,20186,641376,21833,22260,110784,20183,30942,381463,26424,19016,19885,21907,14815,353187,225998,19401,217166,20181,22025,14536,18438,18667,15378,13983
GO:0032502	developmental process	biological_process	2.18e-07	4.74e-06	106	12456	118	17789	18423,114716,17878,16988,69611,13380,24063,22410,24064,12951,18128,545548,68720,17877,380918,12591,22412,216795,69514,22408,19373,22418,22423,16774,12592,630994,240084,54485,22419,16773,66195,73722,677884,66203,114715,67828,16772,22417,16775,20437,246747,68527,22413,56811,67154,18424,238328,73719,211286,22416,68694,234130,20438,16776,12590,11704,17927,66344,211151,11698,227634,18131,13388,22421,2…
GO:0009719	response to endogenous stimulus	biological_process	2.91e-07	6.15e-06	73	12456	78	17789	228139,26379,218772,17125,11835,22259,18440,15370,68010,231602,19015,13982,18124,26380,207565,26423,13865,55994,23958,19411,14683,17131,13983,20181,22025,14815,353187,19401,19885,17127,20183,26424,22044,641376,66508,20186,18171,20182,94045,17126,18436,19013,26381,18439,11819,13864,23957,18227,21834,12355,11614,11604,19883,22026,22337,15378,18667,14536,17130,18438,17129,217166,21907,225998,17128,1…
GO:0007266	Rho protein signal transduction	biological_process	3.74e-07	7.62e-06	67	12456	71	17789	622434,232237,24001,101497,213783,227377,269608,102075,263406,19418,235633,21844,234094,20663,52666,69632,328967,380698,442801,16800,22325,110279,71972,224014,57257,74018,226970,381112,16801,16443,236915,230972,109904,71704,73341,230098,14163,102098,20662,109294,213498,223254,109934,213649,75547,56349,207212,77669,223435,54126,72754,219140,53972,26382,545156,13605,13998,22324,54324,213522,17207,1…
GO:0035023	regulation of Rho protein signal transduction	biological_process	3.74e-07	7.62e-06	67	12456	71	17789	380698,328967,16800,442801,19418,263406,69632,52666,20663,234094,235633,21844,213783,269608,227377,102075,622434,101497,24001,232237,236915,16801,16443,226970,74018,57257,381112,110279,22325,71972,224014,72754,54126,213649,109934,223435,77669,207212,56349,75547,20662,14163,102098,213498,223254,109294,73341,109904,71704,230972,230098,20403,110596,19417,277360,30938,268739,54324,213522,22324,17207,…
GO:0009725	response to hormone stimulus	biological_process	4.66e-07	9.29e-06	55	12456	57	17789	18171,22259,11835,20182,15370,20186,26379,218772,11614,23958,19411,11604,14683,19883,22026,22337,26381,19013,13982,18124,19015,13864,26380,23957,11819,18227,26423,21834,13865,12355,20181,217166,22025,21907,14815,225998,353187,19401,18667,15378,13983,14536,641376,21833,22260,19016,19885,110784,50518,20183,30942,381463,22044,26424,11603
GO:0048856	anatomical structure development	biological_process	4.67e-07	9.29e-06	103	12456	115	17789	17927,11704,20438,12590,16776,11698,211151,66344,227634,13388,18131,18483,22420,22421,67127,76585,229658,69520,98404,57754,17928,73730,20439,20890,22411,22415,18132,67886,94060,66175,545547,29862,57275,16450,226841,114301,631101,22422,69697,66496,22414,50781,18081,16449,18129,211556,244329,24066,70433,93735,71421,22409,16447,93840,13380,69611,17878,16988,114716,18423,22410,24063,12951,24064,17877…
GO:0016337	cell-cell adhesion	biological_process	5e-07	9.9e-06	119	12456	135	17789	93875,68764,329628,233651,93877,93888,93710,93701,353235,93882,107934,93880,93881,93703,227485,13511,93711,93715,12936,93873,75599,93890,192161,219257,53601,12563,211712,93893,245827,93724,215654,22295,353234,93704,232370,69398,93723,93891,93883,12562,93879,239096,270120,241201,19713,211924,93886,93889,245578,320865,12552,93714,353236,12555,12558,12557,93892,192164,12564,14107,65945,93722,73173,1…
GO:0007156	homophilic cell adhesion	biological_process	6.33e-07	1.25e-05	118	12456	134	17789	238939,54216,12550,12560,93706,12565,219228,13506,16769,353237,12561,13505,104010,53883,13507,93717,93709,12937,12941,12556,93712,170677,93700,93702,93878,93874,116731,18530,13512,23836,93876,18526,225256,93884,93887,93708,12614,93885,12942,93713,192163,64085,320873,13510,381409,12939,93705,93699,93707,279653,11994,12554,22295,353234,93704,69398,232370,93723,93891,93883,12562,93879,270120,241201,…
GO:0032870	cellular response to hormone stimulus	biological_process	6.44e-07	1.25e-05	54	12456	56	17789	381463,26424,11603,22044,30942,20183,50518,110784,19885,19016,22260,21833,641376,14536,13983,15378,18667,19401,353187,225998,14815,21907,22025,217166,20181,12355,26423,13865,21834,18227,26380,11819,23957,13864,19013,26381,18124,13982,19015,22337,22026,19883,19411,11604,23958,11614,218772,26379,20186,20182,15370,22259,11835,18171
GO:0051259	protein oligomerization	biological_process	6.81e-07	1.32e-05	65	12456	69	17789	16538,16539,16508,70382,241794,56543,16506,226823,98741,106931,238076,72844,16491,22061,16494,240444,66733,100900,21927,67516,16500,111368,22062,383348,240595,192192,99738,207474,16492,67498,330171,622320,16502,70461,26434,66597,22059,328424,71393,212919,239217,233107,233529,243043,382571,16490,268345,242151,51960,19122,225030,226025,58800,382056,69259,16493,279499,216858,233877,105440,74343,1736…
GO:0023051	regulation of signaling	biological_process	7.23e-07	1.39e-05	129	12456	148	17789	19418,235633,107338,69632,19158,20469,74747,442801,71609,70419,622434,24001,56089,74002,213783,68010,56692,170770,269608,50781,99371,16443,50753,245666,51801,241694,71972,74018,19157,56349,207212,75547,24064,243621,24063,72754,114716,13877,73341,380711,71704,66508,230098,18518,66532,223254,109294,56784,114715,14525,110596,22084,30938,234130,73284,234353,26382,53972,217692,74206,56811,19159,13998,…
GO:0048583	regulation of response to stimulus	biological_process	8.12e-07	1.55e-05	136	12456	157	17789	110596,30938,22084,14525,114715,56784,53972,217692,26382,234353,56811,74206,19159,13998,234130,72699,73284,24063,72754,114716,75547,56349,207212,243621,24064,18518,109294,223254,13877,71704,73341,380711,230098,66508,72512,50753,50781,16443,99371,74018,19157,245666,51801,241694,71972,74747,442801,71609,75747,19418,235633,107338,20469,19158,69632,68010,213783,56743,74002,56692,140742,269608,170770,…
GO:0009755	hormone-mediated signaling pathway	biological_process	8.89e-07	1.69e-05	53	12456	55	17789	18124,26381,19013,13982,19015,23957,26380,11819,13864,18227,26423,13865,21834,12355,23958,11614,11604,19411,19883,22026,22337,20186,26379,218772,22259,11835,18171,15370,20182,19885,19016,110784,50518,20183,30942,381463,22044,26424,641376,22260,21833,15378,18667,13983,14536,217166,20181,22025,21907,14815,225998,353187,19401
GO:0009966	regulation of signal transduction	biological_process	9.05e-07	1.7e-05	128	12456	147	17789	102075,227377,232237,101497,380698,328967,16800,263406,234094,20663,52666,67605,21844,66743,226970,232227,24066,57257,73728,99326,381112,54409,110279,72318,22325,224014,245684,236915,16801,66849,102098,14163,20662,23900,110351,213498,50540,109904,244668,100042777,230972,215748,211673,54126,13380,109934,213649,27220,215632,228850,19229,77669,223435,14083,13605,545156,67154,219140,20403,19417,27736…
GO:0010646	regulation of cell communication	biological_process	9.05e-07	1.7e-05	128	12456	147	17789	219140,13605,67154,545156,22324,54324,213522,17207,20403,268739,19417,277360,230972,100042777,215748,109904,244668,14163,102098,20662,23900,50540,213498,110351,19229,228850,109934,213649,215632,27220,14083,77669,223435,54126,211673,13380,22325,110279,72318,224014,245684,24066,57257,232227,73728,99326,66743,226970,54409,381112,16801,66849,236915,232237,101497,227377,102075,263406,67605,21844,20663…
GO:0030001	metal ion transport	biological_process	1e-06	1.87e-05	100	12456	112	17789	20277,11418,16440,65113,93790,140492,67821,11977,20530,67887,56379,11933,20278,114644,328133,16517,16515,55961,12297,24046,16518,20272,20271,11927,16514,12298,233280,16439,277468,20500,106957,140493,72027,16522,214922,68427,237831,227632,16438,20190,58170,16520,20274,14977,16533,12295,16516,12296,223473,211480,214112,11932,20191,20265,16524,30791,106947,53945,16534,11945,72002,12856,18821,16500,7…
GO:0051260	protein homooligomerization	biological_process	2.08e-06	3.73e-05	56	12456	59	17789	207474,16492,67498,330171,99738,16485,105440,233877,74343,240595,192192,69259,16493,16500,279499,383348,216858,111368,382056,21927,67516,66733,240444,16494,225030,72844,16491,16490,242151,268345,106931,51960,19122,238076,98741,233529,243043,382571,212919,239217,233107,328424,226823,16506,71393,241794,56543,66597,16538,622320,16539,16502,16508,70382,70461,26434
GO:0033993	response to lipid	biological_process	2.33e-06	4.01e-05	50	12456	52	17789	19016,19885,110784,20183,30942,381463,26424,641376,21833,22260,15378,18667,13983,14536,217166,20181,22025,21907,14815,225998,353187,19401,26381,18124,13982,19013,19015,26380,13864,23957,11819,26423,13865,18227,21834,12355,11614,23958,19411,19883,22026,22337,20186,26379,218772,18171,22259,11835,20182,15370
GO:0043401	steroid hormone mediated signaling pathway	biological_process	2.33e-06	4.01e-05	50	12456	52	17789	18667,15378,13983,14536,217166,20181,22025,21907,14815,225998,353187,19401,19885,19016,110784,20183,30942,26424,381463,641376,21833,22260,20186,26379,218772,22259,11835,18171,15370,20182,26381,19015,13982,18124,19013,26380,13864,23957,11819,26423,18227,13865,21834,12355,11614,23958,19411,19883,22026,22337
GO:0048545	response to steroid hormone stimulus	biological_process	2.33e-06	4.01e-05	50	12456	52	17789	641376,22260,21833,110784,26424,381463,20183,30942,19016,19885,14815,21907,19401,225998,353187,217166,20181,22025,14536,18667,15378,13983,22026,19883,22337,19411,23958,11614,26380,11819,23957,13864,26381,18124,13982,19015,19013,12355,26423,13865,18227,21834,15370,20182,11835,22259,18171,218772,26379,20186
GO:0071383	cellular response to steroid hormone stimulus	biological_process	2.33e-06	4.01e-05	50	12456	52	17789	22025,217166,20181,225998,353187,19401,21907,14815,13983,15378,18667,14536,21833,22260,641376,19885,19016,20183,30942,381463,26424,110784,22259,11835,18171,20182,15370,20186,26379,218772,23958,11614,19411,22337,19883,22026,26423,13865,18227,21834,12355,26381,13982,18124,19015,19013,11819,26380,23957,13864
GO:0071396	cellular response to lipid	biological_process	2.33e-06	4.01e-05	50	12456	52	17789	22337,19883,22026,11614,23958,19411,26423,18227,21834,13865,12355,26381,19015,18124,13982,19013,26380,23957,11819,13864,15370,20182,18171,22259,11835,26379,218772,20186,21833,22260,641376,20183,30942,381463,26424,110784,19016,19885,225998,353187,19401,21907,14815,22025,217166,20181,14536,13983,18667,15378
GO:0071407	cellular response to organic cyclic compound	biological_process	2.33e-06	4.01e-05	50	12456	52	17789	14536,15378,18667,13983,21907,14815,225998,353187,19401,20181,217166,22025,110784,30942,20183,381463,26424,19016,19885,641376,21833,22260,26379,218772,20186,15370,20182,18171,22259,11835,18124,26381,19015,13982,19013,23957,26380,13864,11819,26423,18227,13865,21834,12355,19883,22026,22337,11614,23958,19411
GO:0007275	multicellular organismal development	biological_process	2.66e-06	4.54e-05	96	12456	108	17789	71421,22409,16447,93840,70433,93735,24066,244329,16449,18129,50781,22422,631101,69697,22414,66496,57275,16450,226841,94060,66175,545547,22411,22415,18132,67886,229658,98404,69520,57754,17928,20439,73730,20890,67127,76585,22420,22421,13388,18131,227634,11698,211151,66344,17927,11704,12590,20438,16776,234130,68694,22416,211286,238328,73719,67154,18424,56811,22413,20437,16775,22417,16772,67828,11471…
GO:0070887	cellular response to chemical stimulus	biological_process	2.98e-06	5.01e-05	65	12456	70	17789	17131,19411,23958,55994,26423,13865,26380,13982,19015,18124,67605,68010,15370,22259,11835,17125,218772,26379,641376,22044,26424,20183,17127,19885,19401,353187,14815,22025,20181,13983,22337,22026,19883,11604,11614,12355,18227,21834,11819,13864,23957,26381,19013,17126,20182,18171,20186,66508,21833,22260,11603,381463,30942,50518,110784,19016,17128,225998,21907,217166,17129,17130,14536,15378,18667
GO:0071310	cellular response to organic substance	biological_process	2.98e-06	5.01e-05	65	12456	70	17789	11614,11604,22337,19883,22026,21834,18227,12355,19013,26381,23957,11819,13864,18171,17126,20182,20186,66508,22260,21833,17128,19016,30942,381463,11603,110784,50518,17129,217166,225998,21907,15378,18667,17130,14536,23958,19411,55994,17131,67605,26423,13865,18124,13982,19015,26380,22259,11835,17125,68010,15370,26379,218772,641376,19885,20183,26424,22044,17127,22025,20181,353187,19401,14815,13983
GO:0071495	cellular response to endogenous stimulus	biological_process	3.96e-06	6.6e-05	64	12456	69	17789	26423,13865,26380,13982,18124,19015,19411,23958,55994,17131,218772,26379,22259,11835,17125,68010,15370,19885,26424,22044,20183,17127,641376,13983,22025,20181,19401,353187,14815,12355,18227,21834,23957,13864,11819,26381,19013,11604,11614,22337,22026,19883,20186,66508,18171,17126,20182,19016,17128,381463,11603,30942,50518,110784,21833,22260,18667,15378,17130,14536,17129,217166,225998,21907
GO:0040007	growth	biological_process	4.41e-06	7.3e-05	48	12456	50	17789	29862,12164,16008,71924,56213,66175,14563,664779,107250,22402,18081,75426,12165,22403,14219,12159,13590,242316,12161,110075,12160,16010,16011,16009,14432,12163,12156,50766,71690,12162,18133,16012,320202,14561,78558,16006,16007,29817,17700,12154,16324,12803,21809,327743,16323,330723,21808,21803
GO:0090304	nucleic acid metabolic process	biological_process	7.13e-06	0.00011706	1229	12456	1647	17789	67053,17979,71508,60532,66971,17927,100043914,56222,50709,216443,13559,14238,71567,57230,21387,17937,15900,12606,72139,545471,224691,18996,17928,17686,100316903,71828,14011,382137,234219,100642166,16882,26447,58202,66590,77652,631002,81703,408065,16918,233490,67005,17878,78619,319653,235028,71059,66420,245572,17932,17933,76365,21976,15214,20186,15205,21400,245841,245109,69163,53970,223922,219150,…
GO:0006461	protein complex assembly	biological_process	8.66e-06	0.00014014	114	12456	132	17789	70382,16539,16508,93689,16538,56543,241794,20422,233276,21371,16506,226823,67048,246782,76709,110135,328580,98741,74192,238076,68566,106931,50874,66296,68089,50875,16491,72844,18196,16494,22061,240444,68493,66311,66747,99571,100900,66733,212514,19229,71909,12340,67516,21927,14083,111368,383348,22062,16500,21916,192192,12345,240595,20892,99738,330171,16492,67498,207474,70461,26434,16502,230249,622…
GO:0070271	protein complex biogenesis	biological_process	8.66e-06	0.00014014	114	12456	132	17789	51885,382056,56088,226025,225030,100503890,58800,16485,66995,18197,72565,219072,12343,216858,12344,279499,16493,69259,225997,74343,14161,17364,233877,105440,93677,71393,69666,328424,67771,22059,320502,26434,70461,16502,230249,622320,259279,66597,19122,51960,268345,56378,242151,16490,50876,26886,74237,239217,233107,212919,66998,382571,243043,211556,233529,66747,99571,100900,212514,66733,19229,7190…
GO:0015698	inorganic anion transport	biological_process	1.1e-05	0.00017682	32	12456	32	17789	2.68512e+169
GO:0070647	protein modification by small protein conjugation or removal	biological_process	2.26e-05	0.00035665	71	12456	79	17789	76302,99526,72137,54651,22200,13531,75083,15204,22284,140629,329908,74270,22217,53376,67588,30940,83563,74112,327799,24110,17847,225164,22258,59025,30941,77593,252870,100756,74256,22225,76179,140630,72106,13532,224836,170707,75763,112694759,227334,22224,69727,74996,57775,72607,381944,230484,28000,170822,235323,76800,66743,84092,384701,56424,235441,237898,72344,625530,236733,244144,28035,319651,20…
GO:0006820	anion transport	biological_process	4.83e-05	0.0007349	68	12456	76	17789	20511,20533,12723,20535,30962,53896,58176,19743,20539,20531,208890,11987,56315,94229,20505,269356,11732,240215,26373,20512,224022,216441,11989,74087,320718,224661,142681,70784,19746,106073,70456,80979,54403,241919,218756,140475,140918,12728,20514,245128,59033,12733,20540,20510,55951,242607,55963,328059,12725,26570,20513,20516,20515,56365,20536,12727,50934,23985,171429,268512,11988,330836,12724,23…
GO:0016579	protein deubiquitination	biological_process	4.97e-05	0.00075041	55	12456	60	17789	252870,77593,72344,625530,30941,59025,22258,237898,319651,28035,236733,244144,384701,74112,83563,84092,235441,17847,24110,327799,74841,78787,170707,224836,216825,13532,74256,216835,100756,14479,71472,76179,22225,75083,381944,13531,72607,57775,230484,99526,74996,69727,227334,22224,112694759,54651,30940,76800,53376,170822,22284,22217,329908,74270,235323
GO:0070646	protein modification by small protein removal	biological_process	4.97e-05	0.00075041	55	12456	60	17789	30940,53376,76800,74270,329908,235323,22217,170822,22284,230484,13531,72607,381944,75083,57775,54651,69727,99526,74996,112694759,227334,22224,224836,170707,13532,216825,74841,78787,71472,76179,22225,74256,14479,216835,100756,319651,244144,236733,28035,72344,77593,30941,625530,252870,22258,59025,237898,24110,235441,17847,327799,74112,83563,384701,84092
GO:0007267	cell-cell signaling	biological_process	7.52e-05	0.0011294	39	12456	41	17789	###############################################################################################################################################################################################################################################################
GO:0006281	DNA repair	biological_process	7.72e-05	0.0011541	62	12456	69	17789	234258,75570,56210,70603,69596,22594,217716,19355,14088,243897,208084,14885,71885,17685,319583,22596,18207,17193,72774,22592,22427,20892,23894,104884,209334,14156,16881,19365,17350,17686,338371,227622,17688,17687,19090,211651,210554,15574,16882,55993,102443351,19358,108138,52864,102443350,209357,66467,18861,12190,26909,26447,17314,19359,12144,14375,268395,80905,18294,17535,66209,382913,27015
GO:1901362	organic cyclic compound biosynthetic process	biological_process	7.87e-05	0.0011724	1045	12456	1404	17789	11949,619310,50796,52712,320858,21399,67710,18584,331188,22678,18503,18771,20182,235907,19664,17536,22260,240590,382019,11566,69930,74450,24132,15218,667666,232854,104349,15378,195531,19411,210105,13709,18746,70122,17268,18988,626832,11865,50496,233056,22433,114142,54131,20020,75507,67375,79459,381379,56869,81601,73430,211961,235050,71163,73181,20183,100503353,67370,382118,21389,22025,380855,1015…
GO:0007167	enzyme linked receptor protein signaling pathway	biological_process	0.0001173	0.0017161	32	12456	33	17789	1.71272e+161
GO:0018130	heterocycle biosynthetic process	biological_process	0.00012758	0.0018584	1033	12456	1390	17789	116871,100043387,15438,21410,547097,107503,16371,18642,17133,56525,210583,211151,245525,545938,269610,212627,666311,67235,54128,15375,18612,74670,54123,244713,55927,100041677,407812,100043034,57246,210104,228876,239652,30051,73707,230163,434178,13170,66500,210044,108156,29871,17128,14462,80509,328274,22764,381463,71279,226641,237336,268417,68776,18109,72723,75316,224585,72739,218772,56458,20675,1…
GO:0006836	neurotransmitter transport	biological_process	0.00013434	0.0019163	25	12456	25	17789	2.40332e+135
GO:0019438	aromatic compound biosynthetic process	biological_process	0.00017993	0.0025035	1028	12456	1385	17789	212281,15376,76373,72720,20997,27049,54369,13711,67773,100416706,18021,22704,20371,20846,105244402,226182,225998,106248,15229,70227,18506,55936,12393,23856,100216455,68352,14460,387586,18103,623534,21833,329650,17425,22276,100043761,68703,16373,208076,245695,327987,18034,23958,71063,408062,278174,107815,56314,223227,545912,13875,17749,12913,72556,14815,320271,381067,223669,21405,641376,22756,1018…
GO:0034654	nucleobase-containing compound biosynthetic process	biological_process	0.00018195	0.0025196	1015	12456	1367	17789	18022,12014,100642166,234219,15500,20852,72807,56771,23871,18999,170740,56449,27386,77652,631002,11908,58202,20728,233168,100041433,81703,408065,54624,233490,16918,14461,384763,71508,16372,17979,22640,54352,100039060,17927,77117,100043914,13559,56222,14238,13555,57230,15499,22171,18102,21387,17937,545471,72139,15900,12606,19018,18996,224691,74481,666584,100316903,17928,237411,71828,14011,431706,2…
GO:0006650	glycerophospholipid metabolic process	biological_process	0.00022542	0.0030835	30	12456	31	17789	1.87192e+159
GO:0046486	glycerolipid metabolic process	biological_process	0.00022542	0.0030835	30	12456	31	17789	1.47552e+159
GO:0007169	transmembrane receptor protein tyrosine kinase signaling pathway	biological_process	0.00027465	0.0037117	23	12456	23	17789	1.38481e+116
GO:0007166	cell surface receptor signaling pathway	biological_process	0.00031453	0.0042167	751	12456	1004	17789	626397,72585,11556,12765,627111,17130,252904,12061,13838,14762,140795,171268,241070,18241,12671,26912,19214,227333,434016,11555,14686,171273,14823,14371,113857,217143,233080,637908,227326,384534,22423,12402,64378,12311,319217,15566,16001,14362,171277,239845,12057,14527,22355,108069,434701,51801,208650,243628,57260,19220,73010,238377,319387,171192,50781,171198,546903,71223,230777,100042437,93897,1…
GO:0040008	regulation of growth	biological_process	0.00039111	0.0051078	22	12456	22	17789	5.07667e+112
GO:0006644	phospholipid metabolic process	biological_process	0.00039314	0.0051078	43	12456	47	17789	117150,67556,241062,71780,114663,27388,52858,18783,329502,276846,227733,230801,14755,271844,18711,219024,18719,212862,72519,70325,228812,18700,16329,108083,55980,67292,78928,232889,320951,99712,242291,18720,18717,102238433,23827,211429,28042,18701,18718,19210,78390,72084,27392
GO:0046488	phosphatidylinositol metabolic process	biological_process	0.00043271	0.0056002	28	12456	29	17789	6.75567e+149
GO:0006928	cellular component movement	biological_process	0.00048778	0.0062888	77	12456	90	17789	70433,240641,330355,381917,668303,211556,229841,109242,16571,381293,16552,237806,73804,104346,16565,73470,668880,71819,52563,13426,329557,100502766,209737,16578,13417,16562,16553,13427,16776,16582,28010,16574,16560,13424,16559,56087,627872,269152,16581,70218,286942,16775,16573,76568,240960,19348,69926,16564,16563,16568,16576,14525,16772,75050,110350,228421,16570,319991,110033,16773,383592,327954,…
GO:0002376	immune system process	biological_process	0.0005277	0.0067517	139	12456	171	17789	20300,72512,15000,100504404,56838,16187,110696,22370,15006,21947,18605,21943,399549,15216,100862177,69583,16168,14960,18413,20299,15064,100504346,20295,12981,15001,20290,16878,56743,100039863,16193,16191,224753,12479,20306,15039,630294,15002,15013,14525,330122,12985,21926,20308,20311,16196,15945,56066,224761,72699,69550,12480,12007,16963,15042,15040,16988,15007,94212,14963,100504239,83430,15978,5…
GO:0001558	regulation of cell growth	biological_process	0.00055897	0.0070055	21	12456	21	17789	5.07667e+107
GO:0016049	cell growth	biological_process	0.00055897	0.0070055	21	12456	21	17789	1.60082e+107
GO:0016042	lipid catabolic process	biological_process	0.00055944	0.0070055	21	12456	21	17789	1.14308e+114
GO:0006955	immune response	biological_process	0.00060688	0.0075636	135	12456	166	17789	16159,209558,16158,16176,20301,23900,21944,26944,55985,96875,100042493,20303,14972,326623,20310,16175,14998,110557,20307,19011,20293,243864,18606,20309,50930,381091,15024,14103,16198,619441,19124,20292,226866,21950,20305,24047,15018,20312,15043,547347,20304,100040048,14825,17329,16149,330496,14990,21949,14997,14964,20315,18829,57266,15015,667977,14985,24099,14991,14999,14969,16992,20297,14132,149…
GO:0033554	cellular response to stress	biological_process	0.00081196	0.0099354	71	12456	83	17789	243897,14088,69596,22594,217716,231724,75570,71885,19367,14885,22427,22592,18207,319583,17686,17350,209334,67526,23894,102443351,55993,16882,57913,68026,19090,26447,26909,18861,27015,17535,66209,80905,268395,12144,19355,66131,70603,56210,234258,17685,27220,208084,72774,17193,22596,58801,227622,17688,17687,338371,19365,16881,14156,104884,20892,210554,15574,72440,211651,209357,102443350,108138,5286…
GO:0006974	response to DNA damage stimulus	biological_process	0.0012309	0.014534	69	12456	81	17789	19355,56210,70603,66131,234258,17685,208084,72774,17193,58801,22596,338371,17688,227622,17687,16881,104884,14156,19365,20892,15574,210554,72440,211651,102443350,209357,108138,52864,19358,17314,66467,12190,382913,14375,18294,19359,243897,14088,231724,69596,22594,217716,75570,71885,14885,19367,22592,22427,18207,319583,17686,209334,17350,23894,16882,55993,102443351,68026,19090,57913,26447,26909,1886…
GO:0009888	tissue development	biological_process	0.0015571	0.01813	24	12456	25	17789	6.96119e+123
GO:0016311	dephosphorylation	biological_process	0.0018789	0.021432	87	12456	105	17789	19266,19244,27389,66959,19243,252864,19245,19260,56405,15170,12530,12531,72519,104831,382030,19273,13924,13853,24000,237860,19268,19263,235584,24018,231637,67446,19279,19247,19272,19255,19253,19277,19249,19258,19250,100040244,319520,19283,19248,67603,240672,76571,68082,72102,75219,66461,19280,70419,218232,105352,240892,19267,19281,56294,219024,218294,320139,19256,19211,210762,66849,19275,63953,23…
GO:0016055	Wnt receptor signaling pathway	biological_process	0.0021161	0.023346	28	12456	30	17789	2.24092e+141
GO:0048193	Golgi vesicle transport	biological_process	0.0021643	0.023679	23	12456	24	17789	2.18811e+121
GO:0065003	macromolecular complex assembly	biological_process	0.0024119	0.026181	144	12456	181	17789	66597,16502,72155,230249,93677,69666,320502,22059,328424,243043,66998,233529,74237,56086,50876,67733,242151,56378,268345,19122,241732,100503890,226025,56088,225030,382056,72480,50709,17954,171506,216858,239364,16493,66995,18197,12343,72565,16485,20422,56543,192196,75678,22110,16538,93689,16506,67048,98741,17955,58243,110135,76709,68089,50875,66296,106931,68566,74192,238076,54561,50874,66336,68493…
GO:0045454	cell redox homeostasis	biological_process	0.0025567	0.027663	36	12456	40	17789	6.68615e+187
GO:0009894	regulation of catabolic process	biological_process	0.0029813	0.031647	22	12456	23	17789	2.20845e+121
GO:1901360	organic cyclic compound metabolic process	biological_process	0.0030171	0.031926	1418	12456	1950	17789	97827,329650,22110,21833,623534,74213,18103,75901,100216455,68352,14460,387586,23856,12393,55936,213773,15493,18506,70227,15229,106248,225998,226182,76479,69305,105244402,20846,20371,22704,18021,100416706,67773,13711,54369,27049,20997,66181,72720,76373,272158,15376,212281,101835,22756,75033,641376,72962,21405,223669,225348,192159,13871,381067,320271,117903916,14815,72556,12913,17749,545912,13875,…
GO:0042157	lipoprotein metabolic process	biological_process	0.0031869	0.033437	31	12456	34	17789	1.47553e+167
GO:0006470	protein dephosphorylation	biological_process	0.0031896	0.033437	84	12456	102	17789	63953,237523,19275,66849,13537,545622,320139,218294,19256,19211,19252,19264,234129,70686,75590,229776,435391,80915,19276,19259,19246,19262,245857,19271,72349,56291,545902,18218,19274,73547,68440,19283,19248,19258,319520,100040244,19250,68082,72102,240672,76571,67603,240892,218232,105352,19267,66461,19280,75219,70419,19281,56294,24000,13853,237860,13924,19263,235584,19268,67446,19279,231637,24018,…
GO:0071822	protein complex subunit organization	biological_process	0.0037277	0.03836	129	12456	162	17789	51960,16490,26886,239217,233107,212919,382571,211556,71393,67771,26434,70461,259279,622320,276770,219072,12344,279499,69259,225997,17364,74343,14161,105440,233877,399591,19241,51885,100043712,58800,16491,72844,234915,328580,21371,226823,246782,22376,70382,16508,16539,241794,233276,99738,16492,67498,22062,383348,111368,16500,21916,192192,12345,66747,66733,19229,19240,71909,14083,21927,16494,240444…
GO:0044723	single-organism carbohydrate metabolic process	biological_process	0.003741	0.03838	111	12456	138	17789	50935,240119,58866,56727,140481,14381,103963,18640,71780,14936,14348,231727,73379,628870,18419,18770,18641,20014,20443,226265,20446,14380,26879,109979,16430,17308,14347,14430,270198,20447,353204,235587,17309,14751,54613,13807,69064,68292,11870,232493,100198,20454,328417,93961,20450,20445,11871,20448,68273,217664,272411,11546,230163,26878,66435,320011,17159,20442,20440,20452,11676,53625,13808,1864…
GO:0031329	regulation of cellular catabolic process	biological_process	0.0040915	0.041594	21	12456	22	17789	3.20707e+116
GO:0048731	system development	biological_process	0.004174	0.042306	38	12456	43	17789	###############################################################################################################################################################################################################################################################
GO:0006152	purine nucleoside catabolic process	biological_process	0.0047655	0.044793	15	12456	15	17789	2.20847e+81
GO:0006184	GTP catabolic process	biological_process	0.0047655	0.044793	15	12456	15	17789	1.14713e+81
GO:0009143	nucleoside triphosphate catabolic process	biological_process	0.0047655	0.044793	15	12456	15	17789	3.20484e+81
GO:0009146	purine nucleoside triphosphate catabolic process	biological_process	0.0047655	0.044793	15	12456	15	17789	1.94152e+81
GO:0009154	purine ribonucleotide catabolic process	biological_process	0.0047655	0.044793	15	12456	15	17789	1.94152e+81
GO:0009164	nucleoside catabolic process	biological_process	0.0047655	0.044793	15	12456	15	17789	2.98753e+81
GO:0009203	ribonucleoside triphosphate catabolic process	biological_process	0.0047655	0.044793	15	12456	15	17789	2.20847e+81
GO:0009207	purine ribonucleoside triphosphate catabolic process	biological_process	0.0047655	0.044793	15	12456	15	17789	5.41535e+81
GO:0009261	ribonucleotide catabolic process	biological_process	0.0047655	0.044793	15	12456	15	17789	2.20847e+81
GO:0033124	regulation of GTP catabolic process	biological_process	0.0047655	0.044793	15	12456	15	17789	4.04711e+81
GO:0042454	ribonucleoside catabolic process	biological_process	0.0047655	0.044793	15	12456	15	17789	5.41535e+81
GO:0043087	regulation of GTPase activity	biological_process	0.0047655	0.044793	15	12456	15	17789	2.26525e+81
GO:0046130	purine ribonucleoside catabolic process	biological_process	0.0047655	0.044793	15	12456	15	17789	2.20847e+81
GO:1901069	guanosine-containing compound catabolic process	biological_process	0.0047655	0.044793	15	12456	15	17789	6.96012e+81
GO:1901658	glycosyl compound catabolic process	biological_process	0.0047655	0.044793	15	12456	15	17789	4.04711e+81
GO:0007017	microtubule-based process	biological_process	0.004808	0.045066	91	12456	112	17789	16765,408058,16572,56455,217946,16558,16569,110082,327954,245877,16554,16580,100101919,16561,13411,110084,227058,16551,71909,20262,212514,16573,286942,240960,19348,328580,76568,234915,16581,627872,269152,56087,66296,108907,70218,233276,383592,110033,228421,319991,16570,16564,380842,69926,110350,75050,75296,16576,16563,16568,78283,20257,71819,219072,73470,668880,13426,52563,16582,13427,16559,32979…
GO:0006725	cellular aromatic compound metabolic process	biological_process	0.0048972	0.045776	1400	12456	1929	17789	240067,73274,353187,50916,103537,338354,232855,108168395,233789,13983,66354,22759,240690,55993,110639,83557,11910,170828,235497,11622,269870,21380,69955,242620,17300,72554,74352,22259,353172,270004,72180,666532,449521,14958,15260,69596,21685,52808,102638847,21386,381405,78929,71592,18019,229363,14237,56522,319618,12892,108167848,21975,18294,11946,228980,21807,408067,102639598,272322,22654,18667,1…
GO:0006643	membrane lipid metabolic process	biological_process	0.0050703	0.046963	25	12456	27	17789	5.45277e+139
GO:0006357	regulation of transcription from RNA polymerase II promoter	biological_process	0.0050708	0.046963	25	12456	27	17789	6.97924e+137
GO:0007018	microtubule-based movement	biological_process	0.0052764	0.048644	65	12456	78	17789	240641,109242,229841,381917,668303,330355,237806,16552,16571,381293,16565,73804,13426,52563,71819,73470,668880,16553,16562,13417,16578,209737,100502766,16559,16560,16574,13424,16582,13427,70218,16581,269152,627872,56087,19348,240960,76568,16573,286942,110350,75050,16568,16563,16576,16564,69926,110033,383592,228421,16570,319991,110082,327954,16558,217946,16569,16572,100101919,16561,13411,110084,22…
GO:0006520	cellular amino acid metabolic process	biological_process	0.0054428	0.049913	84	12456	103	17789	68915,71522,270685,104458,83669,226539,70396,27267,224805,70223,27388,71941,85305,109093,216443,13361,234734,14085,107045,66881,70120,212679,11720,216456,14598,104174,353172,18601,18600,382137,330817,105148,69955,14629,207182,17768,66590,665563,102436,19210,23874,66044,18416,11898,22375,14854,240334,14661,234724,232087,230577,23887,70560,104816,110960,20226,14660,18602,18599,14590,14645,97541,107…
GO:0048513	organ development	biological_process	0.0054437	0.049913	29	12456	32	17789	7.37197e+149
GO:0046483	heterocycle metabolic process	biological_process	0.0054642	0.049964	1400	12456	1930	17789	242747,11565,67219,211135,77604,243833,243834,271842,12608,170763,102637366,235459,69256,69684,75424,27274,12395,100041379,66070,26918,22596,665902,65020,59057,319615,56404,18641,19365,226414,104884,68219,230162,19075,228410,24075,77200,14235,14464,21677,208084,101095,11819,11964,17936,234413,18432,18861,224893,20181,18018,213011,21425,436240,245474,69745,14919,23959,20664,327992,28077,238722,118…
GO:0016020	membrane	cellular_component	1.6e-56	2.69e-53	2319	12456	2828	17789	238875,22782,71738,53330,16519,229699,23890,77772,18442,14816,619441,171252,108071,93961,26373,171205,243764,12565,171238,17876,381038,68137,78925,171270,15979,14347,111368,240755,234076,229714,171405,18128,18169,12300,14739,54156,80879,74191,16533,54419,16950,11444,18168,66066,26570,72027,81905,56496,66241,11541,11482,54396,13491,546901,16515,20508,12291,268878,11947,18187,59031,70495,66859,2135…
GO:0031224	intrinsic to membrane	cellular_component	1.72e-26	2.9e-24	1354	12456	1675	17789	69017,18007,24044,20265,16524,59033,217356,231470,20333,56857,14755,12057,213006,239845,26874,235504,240638,637908,233080,217143,22785,66058,14823,15566,319217,18115,230101,19729,384534,216441,19775,11732,627191,434016,19214,19164,11556,208117,70699,72585,217845,140795,252904,76306,66631,12765,268934,14062,20502,252907,27027,404291,233115,276846,434110,76713,12774,27413,15559,68059,637898,170829,…
GO:0016021	integral to membrane	cellular_component	4.48e-26	7.18e-24	1348	12456	1669	17789	232962,208890,56219,17773,238252,107767,252909,217664,15562,18141,18399,19299,434117,13731,81016,574402,12777,54598,320225,113848,12802,208634,27224,15551,20538,94045,64540,320718,18671,70840,632793,217316,67510,14765,21337,53945,56199,243270,18217,171194,103098,218756,210463,18387,70423,113851,214111,113846,18701,243277,383103,22306,21336,213438,56696,56418,22354,171236,637896,14744,67168,224079…
GO:0044425	membrane part	cellular_component	5.42e-20	4.14e-18	1483	12456	1883	17789	269356,239029,233230,19301,19739,94229,14126,140494,14747,110891,667067,58861,22297,232431,240215,24052,239853,627367,319200,545279,76498,14063,381091,110880,18436,252837,54420,171187,215723,11964,231591,100042653,109815,224814,238829,93896,171253,20191,170757,15247,233571,12737,67708,53978,20391,12775,171186,233066,22317,667180,78308,52389,14758,108068,14761,29862,269994,20536,73347,22350,68957,…
GO:0005576	extracellular region	cellular_component	3.11e-11	1.08e-09	443	12456	540	17789	245195,13237,12991,328563,22417,100041811,20210,107250,116903,11516,230396,15874,24047,56069,12845,20305,22419,20568,75396,19109,100126776,11812,545947,20293,76527,108956,20211,52020,14599,14419,16198,11816,28078,217212,16173,215001,16012,100126765,20310,27220,65116,11604,20307,100862126,16159,14601,666348,214766,16007,228413,16006,21827,20209,20301,66042,234836,387510,21832,56519,16334,626615,11…
GO:0005856	cytoskeleton	cellular_component	2.16e-08	5.39e-07	236	12456	281	17789	74237,16688,670464,665992,66322,330355,16667,432600,269587,56378,223915,21956,17880,406220,66196,268481,19041,16694,667772,114566,435285,68828,16668,70810,71602,13822,83679,71960,20756,17916,66380,110310,380684,16691,16670,107993,16679,16939,670550,670482,21954,21953,12343,217328,670496,231646,16906,17882,13346,17918,16687,17925,16663,68239,76709,240960,77055,20764,21957,213556,74192,100191037,54…
GO:0071944	cell periphery	cellular_component	7.19e-08	1.65e-06	106	12456	117	17789	20391,67300,74190,100503710,67753,20759,94045,21687,50782,100042514,70784,16500,100303744,18439,14699,20765,94212,18436,14707,11945,11513,20265,11932,14998,18438,24052,50779,107371,327957,14702,381091,110876,20269,110880,20764,12757,210044,98741,74325,20273,19739,20264,320225,11931,277978,20755,14709,271036,15002,20272,106757,14708,12297,24046,16939,75914,14706,24053,14700,228139,24012,18440,1313…
GO:0005886	plasma membrane	cellular_component	2.42e-07	5.23e-06	97	12456	107	17789	18439,20765,14699,94212,18436,14707,11945,11513,20265,14998,11932,20391,67300,100503710,67753,20759,21687,94045,50782,70784,100042514,16500,100303744,19739,20273,20264,320225,11931,20755,271036,14709,15002,18438,50779,24052,14702,327957,110876,381091,20269,110880,20764,12757,210044,98741,74325,231602,207565,20762,67821,15001,64337,244431,14701,15567,106757,20272,12297,14708,24046,16939,24053,1470…
GO:0031012	extracellular matrix	cellular_component	3.73e-07	7.62e-06	67	12456	71	17789	58223,224697,17394,12825,17386,17384,271127,17393,66548,23794,237360,12831,229595,12826,240913,17388,108153,234911,17395,30800,208936,83995,17392,94216,101401,17385,240322,118453,233332,223838,12815,17150,373864,170721,17381,239337,207596,77794,71355,216725,12830,12843,12814,53867,240047,17390,12829,17387,12832,108154,12824,214766,115490424,12822,330119,17391,235130,11504,17389,12819,50530,12828,…
GO:0044430	cytoskeletal part	cellular_component	2.81e-06	4.78e-05	205	12456	249	17789	234582,69464,212632,17886,75706,16669,12345,17909,17910,622629,110082,16666,327954,100009614,77579,22352,100101919,227058,16681,18040,107656,100504183,110308,338367,66747,68178,223917,244281,71909,17920,328580,140781,234915,115486481,16665,94179,108907,66708,100041412,17921,627872,332131,21952,56087,268482,544710,16682,18008,76952,16905,233276,17919,70843,68673,75296,75586,16673,270163,406219,714…
GO:0044459	plasma membrane part	cellular_component	4.73e-06	7.8e-05	77	12456	85	17789	94045,21687,50782,16500,20391,67300,100503710,14707,11945,20265,11932,14998,18439,14699,18436,14702,327957,381091,110876,20269,110880,12757,98741,74325,18438,50779,24052,11931,14709,271036,15002,19739,20273,20264,320225,13138,18440,14710,11933,20272,106757,14708,12297,24046,14706,24053,14700,24012,228139,244431,64337,14701,15567,231602,207565,67821,15001,100043318,14704,24051,14969,14999,76718,20…
GO:0044431	Golgi apparatus part	cellular_component	2.24e-05	0.00035576	37	12456	38	17789	###############################################################################################################################################################################################################################################################
GO:0005794	Golgi apparatus	cellular_component	0.00012952	0.0018785	47	12456	51	17789	381334,78923,53897,229782,20334,69608,12847,74102,330217,56041,54160,12121,217664,100041596,12757,245828,74325,76895,97484,70862,24060,99412,234356,338337,226744,77371,67843,70349,74241,13047,78752,22232,27054,238123,330671,67300,218811,269941,60409,17294,233824,545276,54161,619597,100910,330406,99683
GO:0016023	cytoplasmic membrane-bounded vesicle	cellular_component	0.000134	0.0019163	25	12456	25	17789	6.73002e+126
GO:0031988	membrane-bounded vesicle	cellular_component	0.000134	0.0019163	25	12456	25	17789	5.41618e+126
GO:0030117	membrane coat	cellular_component	0.00016271	0.0022813	31	12456	32	17789	5.07971e+159
GO:0048475	coated membrane	cellular_component	0.00016271	0.0022813	31	12456	32	17789	6.73002e+159
GO:0012505	endomembrane system	cellular_component	0.00018004	0.0025035	123	12456	148	17789	12847,12330,69608,228859,20334,229782,66811,108802,381334,76219,107513,18701,12653,76895,227102,380664,224640,76413,65114,27392,12121,71805,56041,330217,67397,12745,74330,27054,56088,66844,72772,74241,27061,66712,12317,77371,20394,67887,213696,226744,276846,18451,68416,99683,100910,619597,54161,381903,233824,17294,320452,28146,76687,60409,74412,380959,69019,68576,218811,13200,13135,102339,12652,5…
GO:0031981	nuclear lumen	cellular_component	0.00023728	0.0032326	98	12456	116	17789	17126,269344,50793,67279,101185,68219,67224,13557,108961,56790,26896,242705,66467,217708,67219,66213,270118,433586,74469,70088,17129,66172,73247,17130,228980,211586,20587,67381,103806,83602,235459,69792,15574,210554,619332,52864,17128,209357,80509,24074,104394,329650,66464,75660,70020,67065,76199,94112,56452,74075,20933,50496,27878,17125,93697,327987,668110,70408,72836,75316,71828,72568,231724,21…
GO:0000139	Golgi membrane	cellular_component	0.00031289	0.0042114	29	12456	30	17789	7.41027e+151
GO:0034702	ion channel complex	cellular_component	0.0003924	0.0051078	22	12456	22	17789	2.02746e+116
GO:0034703	cation channel complex	cellular_component	0.0003924	0.0051078	22	12456	22	17789	2.02731e+116
GO:0044421	extracellular region part	cellular_component	0.00067167	0.0083401	125	12456	153	17789	17389,12819,11504,100126768,100126779,100043836,50530,12822,626970,668200,235130,17391,330119,23948,12827,110135,12828,12842,30806,100126778,215257,100043842,622307,26561,545947,76527,100126776,235505,320706,233090,16175,16181,12829,100126774,17390,100043300,27220,53867,12814,99571,16173,74499,67412,240047,15139,100126765,108154,66042,115490424,214766,12824,17387,232400,100126773,16176,433107,128…
GO:0016459	myosin complex	cellular_component	0.00068017	0.0084146	41	12456	45	17789	17885,17920,140781,17880,668940,17921,66196,667772,360013,17884,432516,17919,17912,71602,270163,71960,329421,246177,17916,234582,17886,17909,17883,17910,217328,17922,544791,77579,208943,667663,231646,17913,17918,17882,17925,74376,338367,70737,68178,17879,244281
GO:0015629	actin cytoskeleton	cellular_component	0.0013079	0.015389	58	12456	67	17789	74192,56378,17880,21956,68089,66196,17921,21952,668940,140781,76709,17920,17885,21957,71602,17912,67771,329421,71960,270163,360013,667772,21955,17919,432516,17884,17910,17883,21954,17922,544791,217328,21953,12343,12344,17886,234582,17916,246177,12345,17909,66747,338367,74376,17925,244281,17879,12340,68178,70737,231646,667663,67665,77579,208943,17882,17918,17913
GO:0031984	organelle subcompartment	cellular_component	0.0014799	0.017352	50	12456	57	17789	229782,14731,66811,66612,67767,78923,76219,78928,22269,228859,217664,66624,27392,72084,56041,208820,74102,13481,74330,107513,24060,18701,227102,109815,67887,226744,213696,276846,67398,234356,330671,76976,78752,22232,66844,13047,74241,67843,76687,20014,380959,269941,69019,320438,13200,13135,70325,100910,330406,381903
GO:0005654	nucleoplasm	cellular_component	0.0015853	0.018332	78	12456	93	17789	56790,26896,242705,108961,67279,67224,68219,13557,17126,269344,619332,80509,104394,24074,329650,17128,209357,67065,75660,66464,83602,235459,69792,228980,17130,73247,66172,211586,67381,103806,66467,217708,66213,67219,270118,70088,17129,74469,433586,192657,234959,13559,14885,59024,71885,13555,19014,17131,21781,13716,55994,93697,327987,75316,72568,71828,70408,76199,27878,50496,94112,20933,17125,2354…
GO:0044451	nucleoplasm part	cellular_component	0.0015853	0.018332	78	12456	93	17789	70088,17129,74469,433586,270118,67219,66213,217708,66467,103806,67381,211586,228980,17130,73247,66172,69792,235459,83602,67065,66464,75660,104394,80509,24074,329650,209357,17128,619332,269344,17126,13557,67224,68219,67279,108961,242705,26896,56790,192191,70422,72504,54624,68705,12914,328572,381379,28015,112694759,28077,17127,56771,52679,235497,17125,27878,94112,50496,20933,76199,75316,71828,72568…
GO:0005882	intermediate filament	cellular_component	0.0016571	0.018967	110	12456	135	17789	670880,70810,19132,435285,114566,68828,16668,239673,665998,109052,100502865,16694,56735,406220,268481,16661,223915,432600,16907,16667,69664,16705,670464,66322,665992,432602,226180,18039,16688,16663,14580,100040248,16687,13346,16906,670496,53617,71888,670550,670482,16679,16672,16691,16670,107993,233335,110310,66380,380684,237934,71453,670533,406219,16673,75586,16680,68673,64818,70831,70843,16660,6…
GO:0045111	intermediate filament cytoskeleton	cellular_component	0.0016571	0.018967	110	12456	135	17789	16678,100415785,69464,212632,69473,75706,320864,16669,66809,11764,16671,622629,432987,74127,16675,16666,100040276,16664,22352,100009614,16681,68768,107656,18040,100504183,105866,110308,76444,100126226,223917,77055,68239,115486481,16665,94179,66708,100041412,332131,544710,268482,546511,100191037,16682,18008,76952,665891,435273,16905,70831,64818,16660,70843,670472,16680,68673,75586,16673,406219,714…
GO:0031974	membrane-enclosed lumen	cellular_component	0.0019209	0.02169	106	12456	130	17789	192191,105372,67840,72504,70422,54624,67397,64934,12914,68705,11655,28015,381379,328572,50912,11656,56739,19357,28077,112694759,235497,69535,56771,52679,17127,56452,94112,74075,50496,20933,27878,17125,76199,668110,12261,70408,72568,75316,72836,71828,327987,93697,55994,13716,17131,231724,21781,71885,20957,59024,19014,13555,234959,192657,14885,13559,19367,67219,66213,270118,74469,433586,70088,17129…
GO:0043233	organelle lumen	cellular_component	0.0019209	0.02169	106	12456	130	17789	103806,67381,20587,211586,66172,73247,17130,228980,74600,74469,433586,17129,70088,67219,270118,66213,217708,66467,66464,75660,70020,67065,209357,17128,80509,329650,104394,24074,52864,619332,69792,15574,210554,235459,83602,99045,13557,68219,67224,67279,101185,50793,269344,17126,242705,26896,12856,56790,108961,64934,54624,67397,11655,68705,12914,192191,105372,67840,70422,72504,19357,28077,112694759…
GO:0070013	intracellular organelle lumen	cellular_component	0.0019209	0.02169	106	12456	130	17789	210554,15574,69792,83602,235459,24074,80509,329650,104394,209357,17128,67065,70020,75660,66464,619332,52864,67219,270118,66213,17129,70088,74469,433586,66467,217708,20587,67381,103806,74600,228980,17130,73247,66172,211586,108961,242705,12856,56790,26896,50793,17126,269344,13557,99045,101185,67279,67224,68219,28015,328572,381379,11656,50912,56739,28077,19357,112694759,235497,69535,17127,52679,5677…
GO:0005887	integral to plasma membrane	cellular_component	0.0028414	0.030353	27	12456	29	17789	2.02742e+139
GO:0031226	intrinsic to plasma membrane	cellular_component	0.0028414	0.030353	27	12456	29	17789	1.84367e+139
GO:0005783	endoplasmic reticulum	cellular_component	0.0031149	0.032857	54	12456	63	17789	320452,28146,381903,70325,67475,13200,102339,13135,320438,72661,69019,76687,20014,380959,27061,12317,12033,72772,76976,56088,66844,67398,18451,103963,16976,276846,67887,213696,109815,227102,208624,18701,107513,13481,12745,74330,73316,67397,72084,208820,27392,66624,228859,78928,22269,12330,18452,50527,108802,67767,76219,66612,66811,14731
GO:0012506	vesicle membrane	cellular_component	0.0047592	0.044793	15	12456	15	17789	9.96831e+75
GO:0030659	cytoplasmic vesicle membrane	cellular_component	0.0047592	0.044793	15	12456	15	17789	1.2848e+75
GO:0005488	binding	molecular_function	2.18e-59	7.33e-56	7672	12456	10257	17789	17977,219140,56087,80796,19200,387314,17136,69207,14287,67772,56298,80914,211389,14234,22129,17859,14560,20462,75199,66381,242122,13478,22283,74012,627264,93713,67997,20021,84505,213389,108655,626415,233890,101568,73729,242939,22379,22437,68520,232679,320150,22687,67006,75015,217012,72184,71982,64704,320586,11771,12556,19649,434764,108096,384724,93681,56707,243906,330908,212517,12359,66722,70530,…
GO:0043167	ion binding	molecular_function	3.72e-51	3.13e-48	2917	12456	3653	17789	70902,66725,110784,208292,75050,30942,71591,619665,67269,104360,74455,381921,13117,19691,210503,234733,268958,13078,17879,18796,433653,330863,22691,68291,27403,16554,66634,232853,67230,11495,218100,238564,107508,216438,321003,245827,67302,22717,217333,100043772,229900,18762,12642,16552,630836,93873,100503584,17906,50523,17218,100043108,219257,19090,17969,71790,77446,26412,74479,68098,215303,19338…
GO:0005515	protein binding	molecular_function	3.02e-42	1.27e-39	3788	12456	4892	17789	74053,625716,399558,71302,102635496,78911,100126774,244091,70297,12007,319807,28018,21887,238021,13841,404711,14600,207393,73341,268480,74320,14365,224762,320292,435965,278795,64209,14679,15978,216156,72726,74563,57267,76582,17293,329650,72145,114868,329693,260296,244682,215919,23969,100126779,328830,319192,13835,67144,231760,71520,243547,52906,98496,71753,15945,213773,14131,210544,329908,60367,8…
GO:0016740	transferase activity	molecular_function	7.02e-39	2.63e-36	1203	12456	1427	17789	215456,217127,26362,18537,21682,59027,50883,225742,18755,52163,54391,59031,67574,394430,16798,13866,231510,17096,218832,83813,269642,330440,22115,104318,70999,12909,330217,28042,101187,192185,240879,56632,73998,12229,226098,225010,66116,11482,22236,67555,73412,67292,238323,320438,100043665,64707,227154,18770,217558,238505,17299,109245,19373,12704,14347,56542,269181,19229,72141,12894,240755,78070,…
GO:0043168	anion binding	molecular_function	3.43e-32	7.71e-30	1305	12456	1585	17789	216344,381921,11652,73940,212539,140810,234733,211347,245038,67789,74610,19691,75050,403178,22137,66725,216136,23972,78943,107508,238564,74754,21687,68291,19328,13867,74376,68708,17879,433653,19216,66634,16554,17169,27403,17279,94213,209012,74479,100039796,26412,17969,71790,108737,215303,53868,109242,19338,69787,16552,12648,71602,229900,18762,24014,11480,105148,19090,17218,74137,20873,50523,19157…
GO:0097367	carbohydrate derivative binding	molecular_function	2.41e-24	3.37e-22	1153	12456	1418	17789	210009,65967,17686,72935,13682,668880,71567,68203,67657,320806,224824,231932,208144,216443,13681,56504,53886,18481,13548,18588,19354,229898,66196,58231,68146,263764,71206,66590,74142,108960,16571,13728,216877,72065,382137,78394,244059,19331,16882,11858,53860,19339,544791,100043645,56532,213326,70661,60440,13000,70415,56489,16551,71481,64143,17913,26415,17855,214952,74159,235344,13666,20620,67184,…
GO:0016773	phosphotransferase activity, alcohol group as acceptor	molecular_function	8.27e-24	1.11e-21	591	12456	687	17789	14919,110524,27399,14302,26419,13400,26563,21379,74178,232944,70584,15467,18760,72149,11790,17165,622486,12572,14159,13840,11477,244859,117150,433486,245269,18099,12649,56480,26406,235604,241656,104175,21812,13846,217718,269614,17776,18005,26918,13144,18753,12748,16428,218699,19886,14183,106763,105278,26414,620736,14184,320720,18479,67333,665113,19091,12361,224105,244895,230809,228012,545156,7797…
GO:0017076	purine nucleotide binding	molecular_function	9.84e-23	1.23e-20	1130	12456	1395	17789	74355,230073,60344,231580,69922,26900,18000,69562,17685,13211,26395,56199,73991,227541,18671,17883,20133,246177,226982,20226,14469,72388,24050,270198,212880,19179,381937,237300,75678,12750,19299,20480,545814,59021,105787,67040,70762,23996,381314,74918,24015,232533,71091,13627,381406,11651,71981,50850,27263,30934,93762,70359,14211,74351,68915,217265,24086,70120,234734,68441,67470,20393,54170,16337…
GO:0032553	ribonucleotide binding	molecular_function	2.16e-22	2.6e-20	1122	12456	1386	17789	26416,11307,320129,18563,67131,102436,381835,75141,67979,109333,13872,240641,67059,69237,13175,17164,116733,76074,26420,320790,68058,27103,13143,75471,107045,56637,381836,225638,212679,11848,320795,13869,215449,17346,27404,268281,23938,58800,27061,217716,380698,67487,80981,23924,73086,17215,13417,109168,17858,27405,11303,69847,60530,70317,70218,246710,102626,223775,19349,13205,70560,27377,68278,1…
GO:0001071	nucleic acid binding transcription factor activity	molecular_function	2.41e-22	2.7e-20	333	12456	367	17789	75507,56458,15900,12606,18996,218772,19018,74481,14011,54131,18109,18998,22433,114142,15499,50496,21387,12915,18988,19696,13559,13709,13555,14238,14009,15227,19411,80720,18986,81703,109889,233490,16918,14461,11909,21389,22025,18032,11908,382118,20728,20183,73181,12398,23871,18999,170740,15500,20852,54446,217082,13557,20186,19664,20182,18515,76365,17933,18028,20464,14463,22691,245572,20848,17932,1…
GO:0003700	sequence-specific DNA binding transcription factor activity	molecular_function	2.41e-22	2.7e-20	333	12456	367	17789	74120,26386,54139,18514,217127,110794,116871,12609,107503,23872,18991,14282,17125,13982,53314,21781,56501,21384,55994,665913,72667,20847,245525,60611,56632,666311,170936,12394,15375,18612,22757,19885,13661,54123,57246,20850,208647,74570,71375,11911,218030,100041581,21834,229542,12355,30051,21375,242705,544922,12951,56484,57765,93681,235682,21679,15228,66500,13170,14605,13714,546801,14241,210162,7…
GO:0032555	purine ribonucleotide binding	molecular_function	1.04e-21	1.13e-19	1112	12456	1376	17789	110821,269610,17216,320209,13167,208583,12465,26908,80861,67848,224530,17532,104886,26559,15953,240328,237459,75423,628475,71990,26400,667214,26357,72162,27407,12166,234374,623474,71941,11944,23939,101540,11843,330721,19376,399510,225724,30959,100043566,108156,20362,223255,19330,237890,219189,12326,22245,75669,272396,269224,233020,269209,56526,17919,228785,231045,19878,11841,13549,110935,20874,17…
GO:0001882	nucleoside binding	molecular_function	1.65e-21	1.74e-19	1103	12456	1365	17789	71089,218639,30933,75869,21974,269774,17884,382253,20130,20928,19704,12995,18195,75560,19092,11306,231912,434080,16578,16559,12469,71742,15275,19345,19337,19342,381390,27206,16564,270163,22241,73914,12638,67997,19094,74012,109905,58222,22625,69834,56087,56298,80914,18754,67772,14287,12568,59030,68328,18759,17910,71984,77407,101568,71769,66397,68441,67470,20393,16337,54170,54204,241950,58864,24069…
GO:0001883	purine nucleoside binding	molecular_function	1.93e-21	1.86e-19	1102	12456	1364	17789	110350,11479,14772,279029,67166,329421,71966,15257,228421,74448,270192,235344,13666,20620,67184,18647,22390,53859,70661,13000,60440,70415,56489,16551,71481,64143,26415,17913,17855,214952,11858,53860,19339,544791,100043645,56532,213326,16571,13728,72065,382137,216877,78394,244059,19331,16882,229898,19354,66196,58231,68146,71206,66590,74142,108960,208144,231932,224824,216443,13681,56504,53886,18481…
GO:0032549	ribonucleoside binding	molecular_function	1.93e-21	1.86e-19	1102	12456	1364	17789	17920,230809,244895,12361,67333,11565,665113,16573,13429,18479,16581,19346,106763,69684,13629,12748,218699,26918,67928,18951,16569,74734,18607,226414,72433,15944,11481,244418,56297,81003,102414,100043638,224814,217410,11964,110957,224624,77976,17165,18861,229841,19428,72149,67790,232944,74178,12540,26419,13400,14670,14468,16205,319642,18005,17776,214901,64340,21812,12466,235604,11305,26406,11666,…
GO:0032550	purine ribonucleoside binding	molecular_function	1.93e-21	1.86e-19	1102	12456	1364	17789	20874,17909,110935,13549,11841,19878,231045,228785,117229,58988,77579,210145,19384,194219,15519,110355,59125,17472,20362,223255,100043566,30959,108156,225724,19376,399510,330721,11843,101540,23939,17919,56526,233020,269209,269224,272396,75669,12326,22245,219189,237890,19330,26357,667214,26400,71990,628475,11944,71941,623474,234374,27407,72162,12166,208583,320209,17216,269610,110821,75423,240328,2…
GO:0035639	purine ribonucleoside triphosphate binding	molecular_function	2.25e-21	2.11e-19	1101	12456	1363	17789	50850,27263,71981,11651,74351,68915,70359,14211,93762,30934,24086,217265,234734,70120,20393,67470,68441,54170,16337,240697,20585,432555,58864,241950,54204,140557,26921,18000,69562,17685,26900,74355,230073,60344,231580,69922,73991,227541,26395,56199,13211,20133,18671,17883,212880,270198,24050,72388,226982,20226,14469,246177,237300,19179,381937,12750,20480,19299,75678,105787,59021,545814,13627,3814…
GO:0043169	cation binding	molecular_function	2.57e-21	2.33e-19	1668	12456	2125	17789	13113,192163,215445,58186,12942,13510,17389,107587,328274,14462,22764,18744,11502,381463,22436,230598,404195,26561,19059,100043684,18412,100090,16911,14456,434178,11685,12614,57432,434727,13518,67634,24017,228876,110648,66361,14114,240047,11761,93717,26359,13115,22632,71801,72774,383491,217365,210104,407812,100043034,219228,627049,17752,12460,11487,244071,244713,66510,53313,72607,18601,12936,2311…
GO:0046872	metal ion binding	molecular_function	3.06e-21	2.55e-19	1661	12456	2116	17789	234847,14071,65945,26374,24135,67618,100043468,245368,353236,270120,241201,668923,632687,407821,70081,71151,232370,17385,17776,232976,94094,118453,101471,233902,19674,27081,12563,238722,20834,381270,18795,17156,69761,213011,13090,239337,433247,328365,22773,71872,224044,224893,213436,20181,93877,107766,101095,100042782,56727,71164,192120,234413,13497,13121,14464,81003,56364,170757,76703,22682,5640…
GO:0005216	ion channel activity	molecular_function	3.19e-21	2.55e-19	233	12456	248	17789	74096,20276,16492,67498,99738,241118,16532,16510,76856,14804,16500,72413,12790,211468,171209,14405,56843,18436,14408,66733,14810,18439,242443,20191,240444,12288,14394,192775,11435,16494,16534,11447,16491,108015,14407,14409,57442,16521,329954,14802,15168,16519,110880,58802,110876,110886,11870,11936,14809,20273,252972,241794,12788,194352,16531,26373,56188,16513,16539,60613,16508,228139,57780,14800,…
GO:0015267	channel activity	molecular_function	3.19e-21	2.55e-19	233	12456	248	17789	18439,242443,14408,14810,66733,18436,14405,56843,16494,16534,14394,192775,11435,20191,240444,12288,16532,241118,99738,67498,16492,74096,20276,72413,211468,12790,171209,14804,16500,16510,76856,20273,14809,11870,11936,16539,60613,16508,26373,56188,16513,194352,241794,12788,16531,252972,14409,16491,11447,14407,108015,110886,110876,110880,58802,329954,14802,16519,15168,57442,16521,231602,246133,14401…
GO:0022803	passive transmembrane transporter activity	molecular_function	3.19e-21	2.55e-19	233	12456	248	17789	12298,108017,170738,16522,14805,12290,231252,20271,12727,22068,56365,20274,16533,14806,14406,16516,16490,12295,16511,211480,12733,14654,233649,382571,11444,16438,12286,14402,59095,140492,14401,246133,231602,58800,20277,333329,212670,11418,16536,57780,228139,338370,16517,11441,63873,14800,24046,12289,16515,12297,52076,20272,16512,22065,12291,16518,17364,225997,14395,18440,11870,11936,14809,20273,2…
GO:0022838	substrate-specific channel activity	molecular_function	3.19e-21	2.55e-19	233	12456	248	17789	11418,16536,58800,20277,333329,212670,246133,231602,14402,59095,140492,14401,14395,18440,17364,225997,24046,12289,12297,16515,52076,20272,12291,22065,16518,16512,57780,228139,16517,338370,63873,11441,14800,12727,22068,56365,231252,12290,20271,170738,16522,14805,12298,108017,16438,12286,14654,233649,382571,11444,14406,14806,16516,12295,16511,16490,12733,211480,20274,16533,11435,192775,14394,16534,…
GO:0016787	hydrolase activity	molecular_function	5.2e-20	4.07e-18	1273	12456	1600	17789	76560,212933,260408,66569,67269,329384,18549,73532,75050,403178,74610,329993,19072,268958,74455,52504,12153,14375,16554,14121,27403,18968,381122,100504715,11495,17879,18796,244486,74376,26363,224836,66911,321003,14962,78943,75686,353188,381944,101985,229333,105148,109652,11883,14674,24014,19047,16552,71602,229900,23792,19056,114671,109242,76453,14466,329777,208166,232714,235323,94213,14685,74365,…
GO:0005215	transporter activity	molecular_function	6.2e-19	4.64e-17	585	12456	695	17789	74446,99738,12861,20276,211468,142681,16500,320707,22272,18439,242443,110323,224814,18436,236293,56843,73102,192775,244562,11435,21354,20191,64008,14407,28250,24060,110880,58176,20521,213053,330064,66694,16521,20539,353169,94229,12991,140494,269356,56188,240215,56485,16518,21871,11988,12297,11666,11441,330836,14395,27060,328133,228033,53881,239606,67473,14664,16648,102680,140492,11418,230612,1141…
GO:0008144	drug binding	molecular_function	1.04e-18	7.58e-17	894	12456	1101	17789	16179,19687,667772,212032,224742,71960,226419,270672,20868,69181,330355,106794,77706,545926,56527,240255,71760,12144,93843,11352,16574,16560,103236,270685,244631,381072,27413,15277,79456,85305,109093,100502766,77485,26396,21813,236574,74104,13209,606496,12168,20112,14317,66821,18241,18004,14417,29869,13195,14718,67089,67121,279561,17912,16576,75770,20558,26912,320631,107476,18749,12236,110651,761…
GO:0004672	protein kinase activity	molecular_function	9.12e-18	6.53e-16	513	12456	606	17789	14159,13840,244859,11477,245269,433486,18099,12649,235604,26406,56480,241656,21812,104175,13846,217718,18005,17776,14919,14302,26563,26419,13400,232944,21379,74178,70584,18760,15467,72149,11790,17165,622486,12572,77976,23954,217410,102414,622474,245000,100043638,50932,18212,12571,213084,244418,11481,18607,69131,26918,18753,13144,19886,218699,16428,12748,14183,106763,26414,105278,14184,620736,3207…
GO:0016301	kinase activity	molecular_function	2.03e-17	1.42e-15	590	12456	707	17789	331374,628664,18817,269275,68961,170768,12795,108058,56421,15259,14773,12167,20878,18712,75292,12747,107589,546071,12566,22367,74653,21754,228550,240505,18682,20111,140780,12715,12322,26399,26408,22138,71751,22114,623534,18103,12325,226751,13835,83560,21877,22612,230735,216965,26397,11639,20623,110542,104418,16706,17152,271981,20963,18211,225912,83984,23955,320119,667663,664831,55984,12988,381113…
GO:0036094	small molecule binding	molecular_function	3.7e-17	2.54e-15	1569	12456	2018	17789	12469,16559,71742,15275,19345,231912,11306,16578,434080,381390,19342,108062,19337,22185,67959,15384,269774,21974,22235,18242,75869,15569,75705,382253,17884,20928,20130,71089,98660,218639,30933,67331,69865,19092,75560,225432,12995,19704,18195,59030,68328,26462,53890,12568,17714,66397,77407,108121,18759,71984,17910,71769,101568,13017,23881,12638,67997,19094,74012,27206,235574,20462,22241,73914,2701…
GO:0060589	nucleoside-triphosphatase regulator activity	molecular_function	6.39e-17	4.3e-15	162	12456	170	17789	107746,22325,110279,72318,224014,57257,73728,232227,99326,211914,226970,15463,217944,381112,16801,226407,216439,236915,78255,212285,232237,69710,101497,18545,78618,11857,228998,102075,227377,263406,71746,21844,347722,234094,20663,52666,328967,26431,380698,16800,29875,76123,70727,219140,140500,545156,13605,106952,29815,22324,54324,213522,17207,67839,19730,241308,20403,268739,76089,19387,19417,2773…
GO:0030695	GTPase regulator activity	molecular_function	6.66e-17	4.33e-15	156	12456	163	17789	74563,54189,109294,320292,223254,216991,268480,71704,73341,380711,230098,51791,72754,213990,75547,56349,207212,74055,19731,243621,14570,217692,53972,26382,234353,74206,106512,19159,13998,71729,192662,233046,110596,30938,22084,56508,56784,70314,213783,74002,27387,19395,404710,269608,240168,223864,622434,24001,231801,442801,19418,192786,235633,107338,20469,19158,69632,74018,544963,98710,77038,19157…
GO:0030554	adenyl nucleotide binding	molecular_function	6.69e-17	4.33e-15	852	12456	1054	17789	11482,237459,238323,432516,17217,12465,13168,237806,100019,224530,80861,67848,26559,27410,17216,320209,13167,208583,110821,269610,17220,208943,15516,11944,70223,30935,20927,104318,22115,12166,72162,27407,13866,16798,234374,623474,71941,18755,21355,50883,26400,26357,11947,52163,17350,628475,71990,272396,75669,214897,269224,67755,319991,269019,233020,269209,330177,27421,17919,15115,26972,237890,219…
GO:0032559	adenyl ribonucleotide binding	molecular_function	9.08e-17	5.68e-15	850	12456	1052	17789	101540,20586,330721,276950,23939,30959,100043566,108156,192663,12462,223255,19182,68087,399510,78903,93687,54380,225724,219189,22245,12326,26972,237890,269209,233020,15115,27421,17919,330177,269224,214897,272396,75669,269019,67755,319991,228785,100043665,227154,231045,56542,17909,20874,110935,110960,226409,19878,13549,12704,244281,110355,15519,194219,59125,20869,16150,18747,117229,216976,77579,58…
GO:0016772	transferase activity, transferring phosphorus-containing groups	molecular_function	1.16e-16	6.95e-15	706	12456	862	17789	12909,28042,212627,56632,192185,208583,26404,12229,26559,11482,237459,238323,73412,19713,26362,21682,231876,628475,50883,18755,52163,54391,26400,18642,13866,12166,16798,56248,218832,17096,18705,83813,104318,22115,17005,23939,330721,101540,225724,93687,399510,68087,223255,100043566,65964,22245,12326,13836,269019,75669,13139,214897,269224,330177,71279,269209,233020,18770,227154,100043665,228785,135…
GO:0005524	ATP binding	molecular_function	1.42e-16	8.37e-15	841	12456	1041	17789	17279,209012,94213,12461,26412,18392,108737,215303,13631,109242,24013,16552,228775,381293,71602,12648,59126,18762,11480,24014,105148,19090,17218,74137,20873,50523,19106,68943,216019,191578,18555,71819,74044,17916,381979,75607,12534,236930,12545,18639,27416,18751,207565,71743,19718,170472,57815,224805,231646,12537,192656,226539,83669,26401,17882,69663,320632,381921,668940,269152,11652,26448,140810…
GO:0022857	transmembrane transporter activity	molecular_function	2.27e-16	1.25e-14	493	12456	585	17789	14399,53623,15561,20265,59033,16524,22067,108043,11950,27425,22785,381884,19746,227059,109108,26874,12862,240595,14812,14657,238271,12866,216441,14400,236727,19300,16538,20192,100502876,11732,14658,94282,381203,14403,214597,74915,240776,12868,277328,20505,16506,94279,56315,226781,20264,16504,18301,14803,20529,98741,14807,97086,57249,20527,320007,240332,14799,84036,20528,12858,108052,236794,226025…
GO:0019899	enzyme binding	molecular_function	1.94e-15	1.05e-13	151	12456	159	17789	69632,75751,19158,107338,235633,19418,99375,192786,212999,75717,110750,442801,97031,99152,24001,622434,74204,223864,269608,240168,27387,57778,19395,213783,78832,74002,54004,16443,99371,76484,103573,50753,71972,208846,230673,245666,19157,13367,98710,69171,74018,74055,243621,19731,75547,56349,207212,232807,71409,66011,72754,320727,78309,230098,329251,71704,268480,73341,19877,109294,320292,223254,26…
GO:0005509	calcium ion binding	molecular_function	1.37e-14	7.25e-13	357	12456	416	17789	29866,93885,14231,269615,268958,72832,13512,23991,93700,170677,207175,12096,80794,18073,94214,70902,12939,320873,23876,64085,70370,70405,14571,546336,238939,69441,14725,29865,18796,53883,13507,229731,80906,80334,19128,210992,14061,16975,27984,65969,227485,71790,12745,64817,77446,93701,52377,93888,20190,329628,68226,69787,77036,53602,20692,93724,11750,245827,12313,11744,108075,219257,93890,26369,9…
GO:0000166	nucleotide binding	molecular_function	1.4e-14	7.25e-13	1498	12456	1940	17789	12465,26908,224530,80861,67848,104886,17532,17690,15571,26559,14682,74772,50912,15953,240328,237459,14681,53313,217351,100043292,75423,110809,110821,18458,15382,269610,14105,17216,320209,67039,13167,208583,72162,27407,12166,68730,234374,623474,71941,338350,14675,11944,19654,12696,100042874,628475,71990,230721,667214,26400,26357,19330,22436,22384,237890,219189,12326,22245,75669,272396,381626,26922…
GO:1901265	nucleoside phosphate binding	molecular_function	1.4e-14	7.25e-13	1498	12456	1940	17789	56297,233904,12877,102414,81003,100043638,224814,217410,11964,110957,224624,77976,27979,100041480,18951,16569,229700,432508,67889,74734,18607,72433,226414,100568458,244418,26926,11481,15944,106763,14007,13629,69684,218699,12748,67928,26918,17920,230809,67333,665113,11565,13429,16573,244895,12361,77604,18479,16581,19346,28030,68724,104458,11477,16582,433486,100929,234847,18126,76308,218629,17776,1…
GO:0051020	GTPase binding	molecular_function	1.45e-14	7.4e-13	133	12456	139	17789	76582,56419,56508,76441,30938,110596,233046,13998,19159,26382,234353,53972,243621,74055,19731,56349,207212,75547,71409,66011,72754,320727,230098,73341,71704,268480,19877,320292,223254,109294,74563,233726,99371,16443,76484,103573,50753,208846,71972,230673,245666,13367,19157,98710,74018,75751,69632,19158,235633,107338,192786,19418,212999,442801,110750,24001,622434,223864,74204,240168,269608,19395,5…
GO:0003824	catalytic activity	molecular_function	1.08e-13	5.32e-12	3321	12456	4474	17789	242711,13599,271639,18749,71412,110695,15211,211770,208285,216151,13036,74915,14113,77951,22215,14686,240549,20264,23918,24128,68106,14417,108083,226604,19877,14156,241452,76500,116904,76279,18791,79464,56361,240880,11304,223649,20937,78894,72181,94215,18750,11298,77041,14854,230908,56520,20775,12675,71760,12914,19224,13081,70202,12408,28000,11564,66988,20868,214593,72349,235674,76223,242546,6988…
GO:0008289	lipid binding	molecular_function	4.01e-13	1.96e-11	128	12456	135	17789	215114,378700,69226,11746,11749,29816,69024,433492,67804,11807,626615,74156,66629,228796,18830,64652,75761,56018,71939,142682,18843,14218,236920,17972,11808,229593,266781,233071,13982,66557,239552,18705,18667,382083,228802,216871,52635,223672,108956,170461,11816,16952,56440,11747,71893,218699,50768,328563,18805,66895,666348,170625,170755,67135,73388,71982,26359,102141,74718,20616,244962,23943,691…
GO:0030545	receptor regulator activity	molecular_function	2.22e-12	9.97e-11	213	12456	240	17789	12159,215028,56636,12155,242316,56635,18413,93898,75596,23919,12165,100862177,18429,319552,12977,14176,20300,56838,140806,16187,22339,16453,16323,14169,27356,110312,16191,74188,14170,320202,16878,20290,14177,80857,73244,20855,100039863,100504346,20299,22340,20295,12981,12310,12160,12854,67112,80903,239114,18188,18119,16196,20311,15945,56066,19227,14167,18776,230899,22226,18775,57263,23886,215029,…
GO:0030546	receptor activator activity	molecular_function	2.22e-12	9.97e-11	213	12456	240	17789	14560,67310,245195,14526,14180,20292,56069,20305,16000,116903,11516,15874,24047,14173,14165,20293,19109,20309,12161,13590,57262,28078,217212,14174,14599,14164,14419,16198,100042493,19242,16326,20303,16333,12162,20310,14562,24111,75317,18812,20307,19773,12918,64654,16159,14601,16158,21808,21803,19064,17242,20301,234836,21832,18590,14172,55985,19110,16322,22044,22353,16334,54635,11535,14566,16002,1…
GO:0048018	receptor agonist activity	molecular_function	2.22e-12	9.97e-11	213	12456	240	17789	20855,80857,73244,100039863,320202,20290,16878,14177,27356,110312,74188,16191,14170,22339,16453,16323,14169,18188,18119,12160,12854,80903,67112,239114,12981,12310,20299,100504346,20295,22340,12165,100862177,18429,75596,93898,23919,242316,56635,18413,12159,215028,12155,56636,56838,140806,16187,20300,12977,14176,319552,171530,83430,54189,19226,100504239,58991,22341,83428,56221,18811,16183,20302,567…
GO:0022836	gated channel activity	molecular_function	2.8e-12	1.21e-10	127	12456	135	17789	211480,110304,12733,11449,16516,12295,14806,14406,12296,16533,20274,11440,16520,20190,11444,227632,110902,14654,504186,14805,12725,140493,16522,14813,12298,56365,16514,12727,20271,237213,231252,216643,16518,20272,12297,16515,24046,14800,11441,16517,14396,14814,228139,14395,18440,12724,110835,328699,170706,56379,231602,246133,207565,14401,140492,14402,57014,110637,11438,26372,14409,57249,18438,114…
GO:0022839	ion gated channel activity	molecular_function	2.8e-12	1.21e-10	127	12456	135	17789	14401,140492,57014,14402,246133,231602,207565,11438,26372,110637,11441,14800,14814,16517,14396,228139,16518,20272,12297,16515,24046,170706,56379,18440,12724,14395,110835,328699,12298,14805,140493,12725,16522,14813,20271,237213,231252,216643,56365,16514,12727,16533,20274,11440,12733,211480,110304,16516,11449,12295,14806,12296,14406,227632,11444,110902,14654,504186,16520,20190,18436,12728,14405,108…
GO:0043565	sequence-specific DNA binding	molecular_function	3.1e-12	1.32e-10	187	12456	208	17789	19668,20182,14236,15376,20375,101185,13711,19664,27049,14247,18030,20186,217082,19883,22026,83925,22337,50796,69257,26927,20371,13864,14463,54601,26427,13876,15229,16478,23942,225998,12912,15218,217166,232430,229599,14283,14460,14536,15378,14106,15377,22260,21833,240590,110784,30942,223922,226049,14239,14390,19016,15499,68703,15370,114142,22433,16477,12915,242523,17425,11835,26379,218772,56458,12…
GO:0005102	receptor binding	molecular_function	4.74e-12	1.92e-10	321	12456	378	17789	57349,14256,22035,18158,619517,14559,232016,15965,14566,16334,18159,18654,20315,20856,93735,57266,242519,110075,13856,330496,67505,14205,14825,17329,20304,100126775,17700,12154,14171,16325,14175,14178,17311,20305,16773,22419,14180,56069,15874,24047,116903,11516,230396,22417,245195,27261,231134,28078,217212,14103,14419,16198,16775,14599,14174,20293,76527,14173,14165,19109,12161,100126776,20307,116…
GO:0005085	guanyl-nucleotide exchange factor activity	molecular_function	5.92e-12	2.29e-10	108	12456	113	17789	17207,19730,241308,22324,54324,213522,268739,76089,30938,277360,19417,56508,110596,20403,233046,70727,219140,19159,29815,13998,53972,26382,234353,13605,545156,75547,207212,56349,19732,77669,243621,74055,19731,223435,109934,216805,215632,213649,54126,72754,211673,19419,230098,230972,268480,71704,109904,73341,109294,320292,213498,223254,14163,102098,20662,74563,99371,16443,76484,16801,236915,50753,…
GO:0022891	substrate-specific transmembrane transporter activity	molecular_function	6.1e-12	2.33e-10	424	12456	512	17789	69048,30952,22368,67892,67972,14814,20278,231583,110835,170706,76252,333182,207565,14057,239556,20530,15166,16440,66142,12859,110637,110895,22598,13521,223473,11449,110304,225865,11440,193034,54652,246788,102857,58170,20190,16520,226922,68427,110902,20544,55963,227632,229782,106957,11941,50934,16514,216643,243328,23985,102443351,320718,74087,22066,224661,14404,330953,20538,94045,11443,11448,58226…
GO:0016757	transferase activity, transferring glycosyl groups	molecular_function	6.91e-12	2.61e-10	171	12456	189	17789	20441,14594,26938,71103,215493,74782,67292,22239,67555,613123,22236,19719,218476,19309,54218,552899,117592,103534,74493,14344,101187,102637973,11545,21951,99011,14537,74241,11875,59027,20449,105887,547253,380959,227327,394430,67574,100727,225742,22238,243771,11870,78923,54613,654821,55981,20445,100126824,223337,93961,26878,223646,11546,272411,394435,208624,53625,320011,240755,112417,103963,234356…
GO:0003677	DNA binding	molecular_function	8.51e-12	3.18e-10	856	12456	1088	17789	18741,19704,13593,229584,13418,20847,60611,12394,14842,16869,252830,14957,664610,13433,18935,19885,18969,56296,56380,21974,12013,13661,15242,17701,15412,56809,94353,68140,26386,110794,107970,11634,12609,77044,18991,23872,12615,14282,68094,53314,381760,13982,330361,71137,20663,319478,385328,56501,27140,51788,13394,69389,17864,546801,13714,67367,14234,71066,229004,246086,545725,621852,550619,50887,…
GO:0015075	ion transmembrane transporter activity	molecular_function	2.41e-11	8.44e-10	416	12456	504	17789	11438,26372,236794,225030,226025,12858,76713,57014,13487,243616,56379,110862,12724,16493,328699,230810,14396,12292,16535,16485,380728,237213,16502,74166,22063,20516,328059,12725,140493,14813,16439,504186,214922,17178,26946,11957,242151,268345,12789,233979,20540,20510,12296,20265,15561,16524,59033,53623,14399,27425,22067,11950,108043,14657,14812,109108,12862,240595,227059,381884,19746,22785,14400,…
GO:0022892	substrate-specific transporter activity	molecular_function	4.63e-11	1.59e-09	444	12456	542	17789	72392,16509,100043906,74552,22064,11973,15165,16647,66335,11419,224022,12287,56543,18438,238076,28080,20511,110834,16523,57814,12723,78174,74102,14811,64177,20269,53896,208890,14412,19743,218756,103098,12728,72002,53945,106947,98396,11949,28240,30791,320718,74087,224661,22066,14404,20538,330953,94045,58226,11443,11448,106957,229782,11941,16646,50934,16514,23985,243328,216643,102443351,11449,22347…
GO:0008509	anion transmembrane transporter activity	molecular_function	5.5e-11	1.85e-09	395	12456	478	17789	11973,22064,15165,74552,224022,56543,12287,11419,66335,16509,72392,64177,20269,53896,19743,208890,14412,238076,28080,20511,18438,78174,74102,14811,110834,16523,57814,12723,106947,53945,30791,28240,11949,218756,103098,72002,12728,94045,20538,330953,58226,11443,11448,74087,320718,14404,224661,22066,16514,50934,102443351,23985,216643,11941,229782,106957,16520,226922,58170,20190,102857,55963,227632,2…
GO:0042578	phosphoric ester hydrolase activity	molecular_function	5.74e-11	1.91e-09	167	12456	186	17789	19277,19253,83493,231637,19279,24018,269615,68106,19268,66569,13853,74182,23984,403178,13924,14120,50773,19273,18577,12531,11647,238871,230718,14121,70881,18585,56209,252864,18796,66959,74055,227399,18584,19244,19266,11650,76768,72349,101490,72469,19259,19246,245857,18588,75590,19276,224860,229776,13537,320139,19256,19211,110855,56294,18576,17330,18798,240892,19267,19280,66461,19042,76571,233552,…
GO:0008233	peptidase activity	molecular_function	7.04e-11	2.32e-09	482	12456	593	17789	235130,99526,18549,69814,232371,76560,54373,19152,17287,21756,140765,260408,109901,67269,217140,18548,432478,237553,230726,73626,12153,56622,78593,23948,19072,16615,268958,280668,74112,73218,67373,215772,244486,24110,73106,14061,11434,13522,77593,214531,381122,18554,16913,11495,69938,74616,70835,12630,57256,353188,435845,17387,13809,115490424,68876,545055,244421,224836,66124,321003,14962,239833,2…
GO:0046873	metal ion transmembrane transporter activity	molecular_function	7.21e-11	2.36e-09	121	12456	130	17789	11944,16440,11418,16536,15567,20277,22598,243616,14664,20530,246133,93790,102680,140492,76713,104245,20278,13162,328133,110862,56379,170706,24046,16515,12297,20272,16518,67972,16517,16514,20271,106957,277468,16439,20513,233280,16522,72027,140493,11941,12298,74338,22599,102857,58170,20190,16438,16520,68427,232333,214922,242607,55963,227632,223473,12296,20510,16516,12295,214112,211480,20274,16533,1…
GO:0030234	enzyme regulator activity	molecular_function	9.52e-11	3.08e-09	271	12456	318	17789	109294,223254,54189,385643,268390,230098,51791,58200,71704,380711,216991,20732,72754,21857,110595,192200,19731,243621,207212,71059,629747,68553,13998,19159,100034684,217692,234353,12576,233046,68221,192662,11983,22084,30938,110596,278507,70314,56784,320207,269608,27387,19395,20861,18247,640530,24001,622434,17713,277343,442801,12268,12570,69632,19158,22373,235633,12575,13196,98710,16427,66402,5449…
GO:0070011	peptidase activity, acting on L-amino acid peptides	molecular_function	1.25e-10	4e-09	469	12456	577	17789	17380,114228,17395,71829,56538,19143,71472,69453,18551,17388,58992,74841,118453,279028,18792,17385,73902,17392,101401,12334,17384,234847,109820,14071,16619,58799,625530,69597,14950,18048,244144,13526,16618,239337,19701,14940,214951,56207,69511,76800,317677,230709,214523,77794,14942,18550,74996,12339,18815,56264,80886,231915,227334,223838,13041,26441,233332,320454,23993,208171,101056084,235628,230…
GO:0008270	zinc ion binding	molecular_function	2.56e-10	7.98e-09	609	12456	765	17789	19822,68337,57756,24131,71779,224762,671564,109778,11489,56373,74649,224454,109594,57438,78911,101700,83925,20589,14199,14460,75965,225998,72169,381485,105193,271813,110751,11490,215919,384806,12874,21804,18175,11504,21833,12876,214158,68652,382620,240913,17975,22030,434246,74322,65970,68703,66704,19720,100043761,207742,53861,67057,19015,224697,17386,56874,23958,18034,55987,30932,67917,22032,2205…
GO:0015103	inorganic anion transmembrane transporter activity	molecular_function	6.76e-10	2.01e-08	380	12456	463	17789	20276,12861,99738,241118,74446,11989,106073,80979,76856,16510,320707,16500,56774,171209,72413,211468,142681,56843,14405,18436,14810,66733,110323,18439,242443,67843,240444,20191,11435,68775,14394,192775,16534,229706,108015,14407,16491,11447,16521,20539,213053,110880,110876,30962,24060,11870,70701,140494,20512,56188,60613,57780,330836,331004,16517,11441,11988,12297,52076,21871,20272,16518,225997,32…
GO:0015114	phosphate ion transmembrane transporter activity	molecular_function	6.76e-10	2.01e-08	380	12456	463	17789	53945,106947,11949,28240,30791,103098,72002,12728,20538,330953,94045,11443,11448,58226,320718,74087,22066,224661,14404,74552,15165,22064,11973,66335,11419,56543,12287,224022,72392,16509,53896,20269,64177,14412,208890,18438,20511,28080,238076,57814,16523,12723,110834,14811,74102,78174,16440,66142,12859,110637,110895,22598,13521,76252,333182,207565,239556,20530,15166,231583,20278,110835,170706,3095…
GO:0015318	inorganic solute uptake transmembrane transporter activity	molecular_function	6.76e-10	2.01e-08	380	12456	463	17789	16508,16539,26373,14411,16513,21366,241794,12788,194352,16531,252972,105243,66043,20273,14809,11936,110886,67547,58802,329954,14802,16519,15168,57442,11987,20531,14409,12869,12857,69806,208169,16494,22232,245128,12288,14408,241919,20514,140918,234076,12790,381290,14804,75483,16532,67126,67498,16492,74096,56365,12727,171429,16522,72027,233280,26570,277468,108017,12298,77031,20515,11974,11444,23364…
GO:0015563	uptake transmembrane transporter activity	molecular_function	6.76e-10	2.01e-08	380	12456	463	17789	11941,229782,106957,102443351,216643,23985,16514,50934,246788,11440,54652,193034,110304,225865,223473,11449,110902,20544,55963,227632,68427,16520,226922,102857,58170,20190,15166,207565,20530,239556,333182,76252,22598,13521,110895,12859,110637,16440,66142,14814,67892,67972,30952,22368,170706,110835,231583,20278,16509,72392,56543,12287,224022,11419,66335,15165,22064,11973,74552,14811,74102,78174,57…
GO:0017016	Ras GTPase binding	molecular_function	9.57e-10	2.78e-08	92	12456	97	17789	277360,76441,19417,30938,268739,110596,20403,76582,56419,17207,226432,213522,54324,22324,13998,545156,13605,26382,53972,219140,66011,72754,54126,320727,223435,77669,207212,56349,75547,213649,71409,109934,238799,223254,213498,109294,65246,19878,20662,102098,233726,14163,230098,73341,22379,71704,109904,230972,19877,236915,16443,16801,103573,13367,381112,226970,74018,57257,208846,224014,71972,230673…
GO:0031267	small GTPase binding	molecular_function	9.57e-10	2.78e-08	92	12456	97	17789	219140,13998,53972,26382,13605,545156,226432,17207,56419,76582,22324,213522,54324,268739,30938,19417,76441,277360,20403,110596,230098,19877,230972,109904,71704,22379,73341,109294,213498,223254,233726,14163,102098,19878,20662,65246,75547,56349,207212,77669,223435,71409,238799,109934,213649,66011,320727,54126,72754,71972,224014,208846,22325,110279,230673,381112,13367,57257,74018,226970,16443,103573…
GO:0046914	transition metal ion binding	molecular_function	1.2e-09	3.45e-08	761	12456	974	17789	80890,228136,17384,234847,13865,71673,53318,106042,21848,142682,632687,407821,71151,94094,118453,101471,54630,19647,17385,56264,245308,665211,20834,233902,69761,381270,55992,24105,239337,214162,433247,67538,328365,433766,13090,20181,108946,93836,100113398,224044,213436,71164,192120,107766,216848,18227,100042782,56727,14464,13121,81003,56364,76681,13497,232174,380997,69802,66825,22682,76703,56404,…
GO:0004674	protein serine/threonine kinase activity	molecular_function	1.77e-09	5.02e-08	72	12456	74	17789	11920,23797,20393,11480,108058,27219,269275,13400,19090,11482,233789,546071,109333,110279,20868,56527,232341,58231,108737,13631,12167,73086,12166,11651,18751,58800,11477,103236,12168,20112,320795,21812,240505,225997,21813,18755,75607,225638,12322,20111,17776,18753,22241,11479,226751,29869,12325,279561,214897,11652,70425,18754,69847,110651,18761,12323,72508,16150,71481,245000,12675,19216,58988,116…
GO:0005543	phospholipid binding	molecular_function	3.42e-09	9.52e-08	70	12456	72	17789	16558,170755,66895,72183,233489,170625,70160,69178,225861,71607,320119,268396,330914,26359,71982,102141,20616,74718,244962,209131,382083,66616,11752,101113,235406,227449,16952,55988,56440,11747,218699,71893,76561,18805,14218,58240,66696,17972,102607,229593,142682,240752,74478,54198,18705,266781,18704,11745,233071,12306,18806,11746,69150,11749,69787,69024,29816,215114,17969,71790,74479,69226,21746…
GO:0015276	ligand-gated ion channel activity	molecular_function	1.09e-08	2.89e-07	84	12456	89	17789	56379,110835,14395,18440,328699,16517,14814,14396,14800,11441,228139,16518,16515,11438,110637,14401,57014,14402,207565,231602,110902,11444,14654,504186,16520,20190,11440,110304,211480,14806,14406,16516,11449,216643,231252,237213,16514,16522,14805,14813,14657,14812,11448,11443,94045,14804,14404,14400,16524,15561,20191,53623,11435,14394,14399,18436,108043,14405,18439,242443,14810,14408,16519,14802,…
GO:0022834	ligand-gated channel activity	molecular_function	1.09e-08	2.89e-07	84	12456	89	17789	11435,14394,14399,53623,16524,20191,15561,14810,14408,242443,18439,108043,14405,18436,14804,94045,11448,11443,14812,14657,14400,14404,20192,16513,14658,14403,14809,11870,14803,110886,16521,14807,16519,14802,18438,57249,14409,14799,16523,110834,14407,108015,14811,11447,110637,11438,207565,231602,14402,57014,14401,328699,110835,14395,18440,56379,16515,16518,228139,14814,16517,14396,14800,11441,1651…
GO:0022804	active transmembrane transporter activity	molecular_function	1.17e-08	3.08e-07	89	12456	95	17789	76408,19300,236727,18671,74446,67126,26874,17250,20538,56774,381884,320707,381290,20514,234076,224814,103098,11949,21354,239273,67843,244562,22232,56199,208169,229706,240332,74102,20511,28080,74610,14412,97086,24060,74915,105243,66043,21366,19299,20512,27421,14411,12638,11973,67972,73834,11666,331004,67473,74104,13162,104245,21355,76713,102680,27413,11306,243616,27416,14664,15567,110895,277973,27…
GO:0017048	Rho GTPase binding	molecular_function	1.29e-08	3.28e-07	78	12456	82	17789	236915,16801,16443,226970,57257,74018,381112,13367,110279,22325,224014,71972,208846,380698,328967,16800,442801,19418,263406,234094,20663,69632,52666,70435,21844,235633,213783,54004,269608,227377,102075,57778,622434,232237,24001,101497,20403,110596,76441,19417,277360,268739,30938,213522,54324,22324,17207,56419,545156,13605,53972,26382,13998,219140,72754,54126,109934,71409,213649,77669,223435,75547…
GO:0008237	metallopeptidase activity	molecular_function	2.23e-08	5.51e-07	140	12456	158	17789	12873,11568,11499,76223,170721,13524,252866,17288,108657,23793,93721,238405,17381,270669,23792,216725,271127,17393,11497,231093,17386,17394,58223,224697,229595,23794,11488,55987,83995,208936,30800,240913,80898,19155,235130,271813,330119,17391,11490,384806,110751,71791,18675,12874,21892,17287,12876,67269,11504,237553,215615,70008,13599,12153,56622,23948,30806,11491,280668,70574,244486,74649,13522,…
GO:0017111	nucleoside-triphosphatase activity	molecular_function	3.2e-08	7.86e-07	280	12456	339	17789	17885,229841,11307,240641,56505,16565,55932,14468,76074,64340,27404,52563,217262,11305,11666,69192,12780,13430,16582,58799,27061,16553,13417,109168,67487,218629,19348,17920,140781,16573,17858,13429,27405,11303,14676,13207,70218,627872,17921,16581,16570,21969,21973,16568,67928,73710,71723,69926,234582,22596,320707,16569,27406,269400,381338,110082,327954,16561,244562,56200,21354,224814,208084,27409…
GO:0005261	cation channel activity	molecular_function	3.24e-08	7.86e-07	75	12456	79	17789	94045,171209,72413,16500,16492,20276,241118,16532,16524,20265,20191,16534,18436,18439,16519,16521,57442,98741,20269,110876,58802,110880,84036,16523,57814,18438,16531,11419,100502876,20192,16513,20264,20273,16509,240776,72392,56379,170706,110862,18440,20278,16517,228139,20272,52076,16518,24046,16515,12297,20277,16536,16440,11418,140492,207565,246133,231602,227632,16520,58170,20190,16438,16533,2027…
GO:0016887	ATPase activity	molecular_function	3.25e-08	7.86e-07	100	12456	109	17789	268379,13871,12144,56325,320209,27410,18669,330355,77706,11307,74142,100019,11941,237806,224742,67470,21974,74772,19687,224079,20928,268878,217265,27404,73834,11666,67972,11305,217262,21355,74104,22427,26357,27416,14885,13417,27407,66887,27413,11306,224088,20927,13424,12780,11944,27061,381072,58799,74365,14375,28080,56087,72960,27405,11303,74610,76184,20437,192663,24015,217258,66043,74915,110350,…
GO:0005083	small GTPase regulator activity	molecular_function	3.81e-08	9.15e-07	85	12456	91	17789	72754,211673,54126,77669,243621,14570,223435,75547,207212,56349,109934,213649,215632,109294,223254,213498,102098,14163,20662,230098,109904,71704,73341,230972,277360,19417,268739,30938,110596,20403,17207,213522,54324,22324,13998,19159,13605,545156,53972,234353,26382,219140,192662,16800,442801,380698,328967,234094,20663,52666,69632,19158,235633,21844,107338,19418,263406,269608,227377,102075,11857,2…
GO:0016462	pyrophosphatase activity	molecular_function	4.07e-08	9.71e-07	285	12456	346	17789	22154,100502766,103768,27413,17925,66887,14885,67414,14683,17918,381072,16560,227613,16574,217328,73470,14672,103967,22152,74104,71960,224742,73804,19687,667772,74691,22671,56325,12144,17880,240255,13204,268379,13871,103733,77706,330355,106794,18669,71715,16580,13411,22147,667663,19300,17922,26874,634650,16572,11304,14679,16558,217946,14686,320631,17912,74915,22153,16576,236573,110033,360013,5642…
GO:0016746	transferase activity, transferring acyl groups	molecular_function	6.09e-08	1.43e-06	111	12456	123	17789	66116,74763,331046,224530,226856,235674,107435,225010,328572,113868,245532,68262,233549,14712,11656,81601,117903916,56292,69049,70999,12914,11655,18519,107146,56441,52123,110446,231510,68396,27366,12974,231086,28169,14534,67512,21816,74176,241636,70646,98956,269642,435528,11907,100504710,104112,21818,66176,17962,71832,12895,54342,18108,215456,72117,102247,17975,228714,217127,20229,73809,73242,218…
GO:0016817	hydrolase activity, acting on acid anhydrides	molecular_function	6.68e-08	1.54e-06	301	12456	368	17789	269610,72831,19704,668303,381917,27410,17216,320209,80861,26570,237806,100019,20928,17884,432516,14682,74772,21974,14681,71990,67951,268878,26357,22427,21355,16578,70737,209737,224088,14675,353211,27407,72162,11306,22143,16562,14677,93838,11944,208943,16559,20927,13424,20586,56087,626578,217258,192663,67772,56298,72960,270163,219189,16564,66043,16563,74776,27421,22142,17919,12638,71924,319991,764…
GO:0004222	metalloendopeptidase activity	molecular_function	7.26e-08	1.65e-06	106	12456	117	17789	11487,17387,353188,27390,216119,280667,11489,27377,239833,108154,68876,11496,115490424,214766,58860,75805,244486,240047,11491,280668,11495,230857,17390,13522,56622,13599,12153,30806,23948,11492,107522,26561,110751,11502,384806,11490,17391,330119,235130,11504,70478,17389,17287,21892,18675,114896,238406,23925,240913,17388,108153,17395,234911,30800,208936,83995,17380,17392,101401,11500,17385,240322,…
GO:0015081	sodium ion transmembrane transporter activity	molecular_function	7.43e-08	1.67e-06	46	12456	46	17789	14411,11419,21366,20271,20512,20513,20273,74338,20264,22599,110880,58170,102857,20269,110876,232333,14412,55963,242607,20510,20511,20274,229706,240332,11418,15567,20265,22598,20277,243616,103098,14664,20514,76713,102680,56774,104245,381884,20538,13162,20278,171209,24046,241118,20272,20276
GO:0016798	hydrolase activity, acting on glycosyl bonds	molecular_function	1.26e-07	2.79e-06	65	12456	68	17789	74409,382913,18294,109685,15586,15211,17159,12659,226413,76051,235435,12494,15212,110006,230101,72774,12654,26430,381101,110173,14376,104183,58866,140481,229687,17155,18419,628870,12655,234258,238023,83379,268395,232714,66967,15932,14466,12182,217364,14387,71884,15587,17156,17939,20690,15442,73744,71665,69983,227619,74185,17160,77042,74245,231583,14420,66848,11605,74468,230815,329828,192193,16591…
GO:0019001	guanyl nucleotide binding	molecular_function	2.15e-07	4.69e-06	281	12456	344	17789	245240,217378,22671,56044,231931,67286,30877,56350,217371,328778,317757,19326,21822,52187,18534,11844,11840,103967,66067,223881,14672,235072,83408,235442,317758,243374,19762,442827,14683,237107,56412,107526,242505,217151,207704,19334,52856,11852,14686,23912,13495,226422,665155,236573,19324,106572,74222,69721,76338,19700,67653,19335,14679,70784,68895,634650,11845,11861,213990,270160,233328,19341,7…
GO:0016818	hydrolase activity, acting on acid anhydrides, in phosphorus-containing anhydrides	molecular_function	2.73e-07	5.84e-06	292	12456	359	17789	56505,240641,11307,17885,229841,76074,14468,55932,229589,16565,217262,11305,69192,11666,27404,52563,64340,67487,218629,16553,13417,109168,16582,58799,27061,12780,13430,17921,16581,627872,14676,13207,70218,17858,13429,16573,11303,107932,27405,17920,19348,140781,73710,71723,67928,69926,16568,21969,21973,16570,110082,381338,269400,327954,27406,320707,22596,234582,16569,22151,14687,67398,216848,20808…
GO:0008081	phosphoric diester hydrolase activity	molecular_function	2.85e-07	6.07e-06	50	12456	51	17789	77626,218461,269437,269615,233537,18588,18802,71584,114875,72469,433022,110855,403178,29863,239318,241489,74182,23984,227120,66569,18583,18795,224860,234779,110385,18573,242202,18803,104884,18575,18798,18577,18587,12799,18797,18576,18574,225600,207728,78600,74055,18796,18799,18584,233552,56209,54611,18585,238871,18578
GO:0005230	extracellular ligand-gated ion channel activity	molecular_function	3.72e-07	7.62e-06	67	12456	71	17789	14814,14396,14800,11441,228139,110835,18440,14395,328699,207565,231602,14401,57014,14402,110637,11438,110304,14406,14806,11449,11440,110902,11444,14654,504186,14805,14813,216643,231252,237213,14404,14400,94045,14804,14812,14657,11443,11448,242443,18439,14810,14408,18436,108043,14405,53623,11435,14399,14394,15561,14409,18438,57249,14811,108015,14407,11447,14799,110834,110886,14803,14802,14807,1480…
GO:0005088	Ras guanyl-nucleotide exchange factor activity	molecular_function	3.74e-07	7.62e-06	67	12456	71	17789	72754,54126,77669,223435,75547,207212,56349,109934,213649,109294,213498,223254,102098,14163,20662,230098,71704,109904,73341,230972,19417,277360,268739,30938,110596,20403,17207,54324,213522,22324,13998,13605,545156,53972,26382,219140,16800,442801,380698,328967,234094,20663,69632,52666,235633,21844,19418,263406,269608,102075,227377,213783,232237,101497,24001,622434,236915,16443,16801,381112,226970,…
GO:0005089	Rho guanyl-nucleotide exchange factor activity	molecular_function	3.74e-07	7.62e-06	67	12456	71	17789	213783,269608,102075,227377,622434,232237,24001,101497,328967,380698,442801,16800,263406,19418,235633,21844,20663,234094,69632,52666,57257,74018,226970,381112,22325,110279,71972,224014,236915,16801,16443,14163,102098,20662,109294,223254,213498,230972,109904,71704,73341,230098,54126,72754,109934,213649,75547,56349,207212,77669,223435,53972,26382,13605,545156,13998,219140,20403,110596,268739,30938,…
GO:0008083	growth factor activity	molecular_function	3.81e-07	7.73e-06	77	12456	83	17789	54189,22341,16183,17242,14172,16322,18590,64654,11876,21809,14166,21803,21808,16159,14573,12163,16326,19242,14562,12162,14164,16198,14174,16196,14165,14173,14167,12161,13590,12164,14180,14563,23886,14560,70314,320202,14561,14177,80857,17700,22339,12154,16324,14171,16323,16325,14169,16191,14178,14175,14170,12160,67112,80903,18188,18119,18591,12156,22340,14205,12981,93898,12165,18654,14179,12159,12…
GO:0004175	endopeptidase activity	molecular_function	4.53e-07	9.13e-06	310	12456	384	17789	13034,17228,60594,252866,17288,26440,71037,13524,170721,17231,66901,11499,18553,15234,30943,12337,213171,17381,19177,19166,11488,50909,22019,58223,224697,17394,17386,66887,56453,19175,11497,271127,213760,14941,240913,208936,21755,83995,15439,12263,11504,21892,18675,229697,319875,110751,11490,384806,17391,330119,30806,12751,19164,20437,73481,100040208,22072,13599,242711,71753,210622,328780,230908,…
GO:0035091	phosphatidylinositol binding	molecular_function	6.44e-07	1.25e-05	54	12456	56	17789	69150,209131,69024,66616,382083,17969,217463,101113,74479,69226,76742,235406,227449,56440,231834,55988,67804,71893,218699,64652,18805,76561,66629,66696,14218,58240,16558,229593,170755,102607,17972,142682,66895,240752,170625,72183,70160,69178,225861,18705,74478,71607,320119,54198,330914,71982,266781,268396,18704,74718,244962,18806,102141,233071
GO:0005244	voltage-gated ion channel activity	molecular_function	1.54e-06	2.85e-05	45	12456	46	17789	12728,246133,26372,16524,20265,16517,16492,24046,16515,12297,20272,16518,56379,170706,16500,12724,12298,20264,20273,16522,12725,16509,20271,12727,16513,26373,16514,56365,57814,12723,16523,20274,12296,16516,12295,211480,12733,16521,98741,57442,16519,110880,20269,110876,16520
GO:0022832	voltage-gated channel activity	molecular_function	1.54e-06	2.85e-05	45	12456	46	17789	16520,20269,110876,110880,16519,16521,57442,98741,211480,12733,12296,16516,12295,57814,16523,12723,20274,16514,56365,12727,16513,26373,20271,20273,16522,12725,16509,20264,12298,12724,16500,56379,170706,20272,16518,24046,16515,12297,16517,16492,16524,20265,26372,246133,12728
GO:0032561	guanyl ribonucleotide binding	molecular_function	1.56e-06	2.86e-05	265	12456	327	17789	229898,19354,54204,18588,432555,100039796,53868,19338,68146,229900,68441,69159,72065,53869,19106,19331,54170,65967,11842,19744,19769,320806,67042,67657,68203,68939,19344,231932,231279,19329,20624,20224,104215,13494,70359,216344,74006,59021,212539,76108,56795,13627,403178,80837,11566,67166,76877,66725,620913,24067,71966,270192,67844,74448,19339,100702,53860,11858,100972,75668,226982,14469,381812,1…
GO:0008236	serine-type peptidase activity	molecular_function	1.59e-06	2.9e-05	169	12456	201	17789	56538,114228,69453,18551,353130,19143,18552,58992,74306,18792,13483,216797,14071,76701,15451,16619,232717,18048,214951,16618,14940,17225,245839,69511,317677,14942,214523,109821,53419,18550,18815,330657,626834,235631,320454,50908,11537,23993,235628,208171,13646,381038,17227,14943,14068,19146,317652,76867,114661,100503895,243083,114662,68668,19661,50528,218304,215160,73336,83768,19123,13482,14944,1…
GO:0017171	serine hydrolase activity	molecular_function	1.59e-06	2.9e-05	169	12456	201	17789	14939,67373,73106,14061,11434,214531,18554,230908,328780,69540,17224,70835,75002,12630,57256,435845,16613,545055,14962,18791,18549,69814,232371,319875,76560,54373,19152,21756,109901,260408,140765,12263,18548,432478,210622,71753,73626,230726,242711,22072,73481,100040208,20437,16615,19072,12751,226243,19144,213760,231382,70993,19025,66887,243084,56453,14945,13650,22019,50909,436523,15439,21755,1945…
GO:0008047	enzyme activator activity	molecular_function	1.69e-06	3.06e-05	51	12456	53	17789	347722,319618,20469,228850,213990,66251,12570,216963,230837,26431,109791,69710,231801,268390,12569,216991,380711,244668,212285,228998,110351,14916,105886299,404710,54189,78618,226407,70314,56784,19387,75901,22084,217737,110854,216439,216859,11813,241694,98366,29875,110279,15463,77038,13196,106952,99326,211914,217692,544963,74206,140500
GO:0004553	hydrolase activity, hydrolyzing O-glycosyl compounds	molecular_function	2.08e-06	3.73e-05	56	12456	59	17789	15212,110006,230101,227619,74185,74245,77042,17160,12654,26430,231583,110173,66848,14420,14376,104183,11605,58866,230815,74468,140481,329828,229687,17155,16591,17158,192193,18419,628870,108687,12655,74409,238023,83379,232714,109685,15586,66967,15932,14466,15211,17159,217364,14387,71884,15587,12659,226413,76051,235435,17156,17939,20690,73744,69983,71665
GO:0005525	GTP binding	molecular_function	2.1e-06	3.74e-05	263	12456	325	17789	17274,227624,13628,26905,140743,54396,240328,56382,75869,15953,216439,75423,69581,66922,20130,232441,26908,71089,103080,218639,104886,67295,17532,19342,80718,667214,19332,240327,19337,219144,11854,242681,212508,170758,225594,52398,19345,18176,69908,16653,56298,19376,20362,109905,69834,626578,226421,11843,58222,56327,16145,59040,56526,74012,18952,14853,19340,19330,56437,71619,11891,632971,11841,69…
GO:0015291	secondary active transmembrane transporter activity	molecular_function	2.33e-06	4.01e-05	50	12456	52	17789	22232,236794,277973,67843,22598,15567,110895,14664,243616,103098,76713,102680,20514,234076,56774,381884,104245,13162,20538,67473,74446,331004,236727,14411,21366,20512,105243,20513,229782,22599,74338,77031,20516,20515,24060,102857,55963,380701,20544,97086,242607,232333,14412,20511,20510,74102,226999,229706,208169,240332
GO:0042623	ATPase activity, coupled	molecular_function	3.02e-06	5.06e-05	60	12456	64	17789	17250,26874,244421,74104,22427,320707,21355,22596,381290,76408,67972,269400,19300,381338,11666,73834,18671,67126,11949,58799,74365,239273,27061,21354,11944,244562,20927,12780,56199,66887,27413,11306,224814,14885,27416,74610,74142,20437,77706,18669,72960,320209,56325,12144,14375,13871,28080,20928,21969,21973,19299,27421,12638,19687,21974,11973,237911,74915,11941,66043
GO:0005096	GTPase activator activity	molecular_function	8.27e-06	0.00013501	40	12456	41	17789	106952,77038,13196,15463,544963,74206,140500,211914,99326,217692,98366,241694,110279,29875,22084,19387,216439,216859,70314,226407,56784,110351,404710,228998,54189,78618,231801,69710,244668,380711,212285,216991,66251,216963,230837,26431,20469,347722,228850,213990
GO:0019783	small conjugating protein-specific protease activity	molecular_function	9.31e-06	0.00014991	61	12456	66	17789	327799,24110,235441,17847,84092,74112,83563,384701,236733,244144,28035,319651,59025,237898,22258,77593,30941,72344,625530,252870,22225,71472,76179,14479,100756,216835,74256,216825,13532,224836,170707,93841,78787,74841,54651,112694759,231915,227334,22224,69727,74996,99526,230484,50933,57775,72607,13531,75083,381944,74270,235323,329908,22217,56207,22284,170822,104416,76800,22223,53376,30940
GO:0016791	phosphatase activity	molecular_function	1.33e-05	0.0002128	112	12456	130	17789	56294,219024,17330,19281,72391,19267,218232,105352,240892,67881,75219,237928,19280,66461,235534,72102,19042,68082,56318,67603,103850,240672,76571,19248,11432,19283,19250,100040244,319520,19258,73547,19043,19274,18218,11650,545902,76768,72349,56291,327655,68440,107569,19246,19262,73373,19259,19271,245857,19264,19252,80915,19276,435391,229776,75590,70686,234129,545622,68991,13537,66610,232941,19275…
GO:0008194	UDP-glycosyltransferase activity	molecular_function	3.22e-05	0.00050693	29	12456	29	17789	2.17119e+158
GO:0004252	serine-type endopeptidase activity	molecular_function	3.61e-05	0.00056485	155	12456	187	17789	76453,30943,74142,56640,213171,17228,71037,66901,246104,17231,217344,317653,15234,18553,244199,14941,16621,436523,21755,15439,194597,22019,50909,243084,66887,56453,14945,13650,226243,213760,19144,231382,70993,16615,12751,19072,20437,242711,22072,73481,100040208,210622,432478,71753,73626,230726,21756,140765,260408,109901,12263,18548,76560,19152,69814,232371,319875,18549,18791,14962,545055,435845,5…
GO:0016758	transferase activity, transferring hexosyl groups	molecular_function	3.66e-05	0.00056992	100	12456	116	17789	272411,71773,66435,26878,394435,217664,68273,53625,208624,320011,233781,78923,320302,232493,68292,217119,71001,654821,67569,93961,223337,14538,280645,26879,320438,269941,110417,17309,269181,72077,330406,16430,394432,17308,14347,103963,94215,112417,234356,240755,394433,14343,230801,14755,243085,67556,78752,14348,231727,14936,330671,218476,54218,19309,103534,117592,552899,14344,217734,71103,171167,…
GO:0005179	hormone activity	molecular_function	3.72e-05	0.00057639	81	12456	92	17789	67405,12310,67505,16846,12640,12854,67000,74188,110312,27356,16453,19114,19112,20855,73244,11535,16334,22044,22353,319552,18814,666317,18158,16002,14607,56635,20856,57264,13856,215028,18429,12424,75596,18159,23919,30878,16333,16336,19111,19773,27372,75317,18812,109648,19113,24111,14601,54615,107849,12918,19110,171530,19226,21832,18811,83428,19064,58991,14526,20287,223780,67310,245195,215029,15874…
GO:0003774	motor activity	molecular_function	4.2e-05	0.00064906	103	12456	120	17789	17879,244281,68178,74376,338367,17913,16554,16580,16551,667663,227058,16561,77579,100101919,13411,110084,327954,17922,544791,110082,17883,17910,16572,17909,17886,16569,16558,246177,217946,234582,329421,69926,16564,270163,16568,16563,16576,17912,75050,110350,17919,228421,319991,16570,110033,383592,360013,56087,668940,269152,627872,16581,17921,70218,286942,16573,140781,17920,240960,19348,100502766,…
GO:0022843	voltage-gated cation channel activity	molecular_function	4.36e-05	0.00066962	35	12456	36	17789	1.65216e+178
GO:0015370	solute:sodium symporter activity	molecular_function	4.61e-05	0.00070444	28	12456	28	17789	1.44112e+149
GO:0015293	symporter activity	molecular_function	8.43e-05	0.0012439	33	12456	34	17789	2.05381e+175
GO:0015294	solute:cation symporter activity	molecular_function	8.43e-05	0.0012439	33	12456	34	17789	7.41022e+175
GO:0016298	lipase activity	molecular_function	9.41e-05	0.001382	26	12456	26	17789	2.1143e+143
GO:0004620	phospholipase activity	molecular_function	0.0001344	0.0019163	25	12456	25	17789	1.02238e+138
GO:0004721	phosphoprotein phosphatase activity	molecular_function	0.00015481	0.002198	86	12456	100	17789	19271,245857,19246,19262,19259,68440,19043,73547,19274,18218,56291,72349,545902,320139,19256,218294,19211,545622,68991,13537,232941,19275,63953,237523,80915,19276,435391,229776,75590,70686,234129,19264,19252,75219,66461,19280,19267,105352,218232,240892,72391,56294,19281,100040244,19250,319520,19258,19248,19283,67603,240672,76571,72102,19042,68082,24018,231637,67446,19279,19255,19253,19247,19272,1…
GO:0016763	transferase activity, transferring pentosyl groups	molecular_function	0.00016233	0.0022813	31	12456	32	17789	1.09979e+172
GO:0004112	cyclic-nucleotide phosphodiesterase activity	molecular_function	0.00019192	0.0026467	24	12456	24	17789	2.38871e+127
GO:0004114	3',5'-cyclic-nucleotide phosphodiesterase activity	molecular_function	0.00027424	0.0037117	23	12456	23	17789	2.38871e+122
GO:0016741	transferase activity, transferring one-carbon groups	molecular_function	0.00035021	0.0046764	96	12456	114	17789	22017,234728,17314,69719,217038,110599566,15547,78890,14450,74455,208266,69740,56095,84505,52535,554292,18948,68043,18113,67390,14113,216188,74157,68017,59035,229780,75284,14792,79565,328162,110147,28114,231803,64707,101867,17299,71664,238505,21743,319263,239122,76781,108147,109245,107626,74729,668178,791260,15468,18416,237730,20937,72181,14055,69606,12846,69487,240879,210529,14791,106014251,7768…
GO:0008168	methyltransferase activity	molecular_function	0.00035899	0.0047748	89	12456	105	17789	22017,17314,234728,110599566,217038,56095,69740,74455,208266,78890,15547,52535,554292,84505,18113,68043,18948,14113,67390,74157,14792,229780,75284,59035,68017,231803,110147,28114,328162,79565,21743,71664,319263,17299,238505,101867,64707,107626,74729,76781,109245,239122,791260,668178,237730,15468,20937,14055,72181,69487,12846,240879,210529,77683,106014251,14791,56335,54632,30949,393082,52064,78796…
GO:0019838	growth factor binding	molecular_function	0.00039109	0.0051078	22	12456	22	17789	1.42193e+112
GO:0019842	vitamin binding	molecular_function	0.00039287	0.0051078	43	12456	47	17789	11655,71760,17850,228677,107869,381411,229905,73748,108682,268656,20397,268860,14719,26912,15186,72947,14417,68591,66112,14415,11656,216136,18242,23923,246277,14718,13195,67247,238505,29807,21452,14317,56794,20773,14603,329470,94184,234724,70266,268782,76282,270086,76615
GO:0016747	transferase activity, transferring acyl groups other than amino-acyl groups	molecular_function	0.00049776	0.006393	66	12456	76	17789	67877,21454,11298,18107,100043497,67773,93673,97243,668257,192654,17961,245533,244349,69215,240549,17960,75541,52538,110460,20280,54169,93674,67800,68393,14534,70646,27366,68396,231086,66176,17962,54342,98956,269642,100504710,435528,17975,72117,228714,217127,20229,18108,64697,73809,73242,235674,107435,74763,66116,224530,11656,81601,328572,113868,245532,233549,69049,70999,11655,12914,117903916,562…
GO:0005520	insulin-like growth factor binding	molecular_function	0.00055897	0.0070055	21	12456	21	17789	3.27743e+107
GO:0005326	neurotransmitter transporter activity	molecular_function	0.00056003	0.0070055	21	12456	21	17789	1.44112e+113
GO:0005328	neurotransmitter:sodium symporter activity	molecular_function	0.00056003	0.0070055	21	12456	21	17789	1.44112e+113
GO:0031406	carboxylic acid binding	molecular_function	0.00080008	0.0098259	20	12456	20	17789	1.84161e+105
GO:0043177	organic acid binding	molecular_function	0.00080008	0.0098259	20	12456	20	17789	1.29504e+105
GO:0008514	organic anion transmembrane transporter activity	molecular_function	0.0011424	0.013804	25	12456	26	17789	2.42608e+132
GO:0005539	glycosaminoglycan binding	molecular_function	0.001143	0.013804	19	12456	19	17789	1.92188e+99
GO:0019199	transmembrane receptor protein kinase activity	molecular_function	0.0011446	0.013804	19	12456	19	17789	1.14811e+95
GO:0015399	primary active transmembrane transporter activity	molecular_function	0.0011609	0.013804	39	12456	43	17789	###############################################################################################################################################################################################################################################################
GO:0015405	P-P-bond-hydrolysis-driven transmembrane transporter activity	molecular_function	0.0011609	0.013804	39	12456	43	17789	###############################################################################################################################################################################################################################################################
GO:0016820	hydrolase activity, acting on acid anhydrides, catalyzing transmembrane movement of substances	molecular_function	0.0011609	0.013804	39	12456	43	17789	###############################################################################################################################################################################################################################################################
GO:0042626	ATPase activity, coupled to transmembrane movement of substances	molecular_function	0.0011609	0.013804	39	12456	43	17789	###############################################################################################################################################################################################################################################################
GO:0043492	ATPase activity, coupled to movement of substances	molecular_function	0.0011609	0.013804	39	12456	43	17789	###############################################################################################################################################################################################################################################################
GO:0032403	protein complex binding	molecular_function	0.0011699	0.013861	30	12456	32	17789	7.68291e+157
GO:0016410	N-acyltransferase activity	molecular_function	0.0015522	0.01813	42	12456	47	17789	69049,70999,12914,11655,56292,117903916,93674,18519,107146,56441,107435,74763,66116,240549,11656,328572,75541,17975,72117,228714,20229,18108,64697,69215,73809,73242,14534,70646,68396,27366,67877,66176,18107,11298,54342,100043497,98956,269642,100504710,435528,97243,93673
GO:0005272	sodium channel activity	molecular_function	0.001634	0.01883	18	12456	18	17789	2.02732e+93
GO:0016881	acid-amino acid ligase activity	molecular_function	0.001965	0.022077	45	12456	51	17789	68350,75788,107568,329152,67588,70790,76608,28000,66156,140629,66313,209462,66894,15204,73998,22215,72137,226098,12211,22200,117146,14629,19647,17999,59026,63958,72106,100763,269700,14897,217558,140630,207304,16396,94253,19373,67345,14854,83814,77853,67138,235439,56424,225164,68497
GO:0016407	acetyltransferase activity	molecular_function	0.0019682	0.022077	37	12456	41	17789	###############################################################################################################################################################################################################################################################
GO:0015079	potassium ion transmembrane transporter activity	molecular_function	0.001975	0.022079	37	12456	41	17789	###############################################################################################################################################################################################################################################################
GO:0004842	ubiquitin-protein ligase activity	molecular_function	0.0020064	0.022282	41	12456	46	17789	14897,217558,140630,207304,16396,19373,94253,19647,17999,63958,59026,100763,72106,269700,235439,56424,225164,68497,67345,83814,77853,67138,76608,28000,66156,140629,66313,68350,329152,75788,107568,70790,73998,22215,72137,226098,12211,117146,209462,66894,15204
GO:0019787	small conjugating protein ligase activity	molecular_function	0.0020064	0.022282	41	12456	46	17789	209462,66894,15204,73998,72137,22215,12211,226098,117146,68350,75788,329152,107568,70790,76608,28000,66156,140629,66313,67345,83814,77853,67138,235439,56424,225164,68497,19647,17999,63958,59026,72106,100763,269700,14897,217558,140630,207304,16396,94253,19373
GO:0016782	transferase activity, transferring sulfur-containing groups	molecular_function	0.0020261	0.022428	56	12456	65	17789	628779,23908,83398,195646,73671,20860,29859,56362,71797,15531,68947,330440,56773,319901,57429,53374,69083,319415,77590,434121,619597,328779,72136,545276,20888,50785,59031,50787,54371,20887,216881,53897,26887,338362,353371,381334,64580,60322,50786,17423,76969,54710,638251,76971,98388,100041596,330217,15476,67041,629219,15478,64059,58250,20859,71367,53315
GO:0005342	organic acid transmembrane transporter activity	molecular_function	0.0021674	0.023679	23	12456	24	17789	2.05407e+121
GO:0046943	carboxylic acid transmembrane transporter activity	molecular_function	0.0021674	0.023679	23	12456	24	17789	3.30836e+121
GO:0016879	ligase activity, forming carbon-nitrogen bonds	molecular_function	0.0022934	0.024975	59	12456	69	17789	70988,17999,19647,100763,72106,63958,59026,269700,217558,14897,140630,207304,14645,266744,94253,19373,16396,67345,70396,11898,83814,14854,67138,77853,270685,56424,235439,229363,225164,229487,68497,68350,75788,107568,329152,70790,11565,67588,108156,76608,55936,66156,14450,28000,51797,140629,66313,66894,209462,15204,72137,22215,73998,22200,11566,226098,12211,117146,14629
GO:0005267	potassium channel activity	molecular_function	0.0025655	0.02767	36	12456	40	17789	1.65206e+190
GO:0016705	oxidoreductase activity, acting on paired donors, with incorporation or reduction of molecular oxygen	molecular_function	0.0028145	0.030258	128	12456	160	17789	13166,320769,226565,56388,226143,13105,320452,106648,622127,59012,270086,14261,18451,13079,13107,13112,21672,18127,13075,13081,56050,68444,20591,233005,13098,69888,242546,14262,102294,230459,13109,13086,72082,100043108,545288,13070,76279,21990,13110,226604,11758,13106,15369,56448,100041449,13101,170716,13118,71519,110115,20775,13088,18125,13116,214899,13117,21823,100066,208285,13078,77951,70101,1…
GO:0008373	sialyltransferase activity	molecular_function	0.0029806	0.031647	22	12456	23	17789	2.04522e+113
GO:0005164	tumor necrosis factor receptor binding	molecular_function	0.003326	0.034383	16	12456	16	17789	1.36077e+81
GO:0032813	tumor necrosis factor receptor superfamily binding	molecular_function	0.003326	0.034383	16	12456	16	17789	5.09302e+81
GO:0004190	aspartic-type endopeptidase activity	molecular_function	0.0033275	0.034383	16	12456	16	17789	7.45858e+82
GO:0070001	aspartic-type peptidase activity	molecular_function	0.0033275	0.034383	16	12456	16	17789	2.29697e+82
GO:0008378	galactosyltransferase activity	molecular_function	0.003331	0.034383	16	12456	16	17789	5.42182e+89
GO:0008146	sulfotransferase activity	molecular_function	0.0038576	0.039456	53	12456	62	17789	29859,20860,73671,83398,195646,23908,628779,56773,330440,68947,15531,71797,56362,319415,69083,53374,57429,319901,59031,50785,20888,545276,72136,328779,619597,434121,77590,60322,64580,381334,338362,26887,53897,216881,50787,54371,20887,76971,638251,54710,76969,50786,17423,15478,629219,15476,330217,98388,100041596,53315,71367,20859,58250
GO:0005249	voltage-gated potassium channel activity	molecular_function	0.0040893	0.041594	21	12456	22	17789	1.64922e+106
GO:0005125	cytokine activity	molecular_function	0.0042284	0.042729	56	12456	66	17789	55985,100040048,100039863,100504239,83430,234836,20304,56221,20290,20301,16878,20302,16158,20312,56744,16963,20307,330496,239114,16171,17329,14825,20310,77125,20303,20299,100042493,100504346,20295,20297,100862177,56066,20309,18413,57266,20293,20311,18829,20315,15945,24047,56838,140806,57349,53603,14256,20305,20300,56069,20306,20292,12985,330122,12977,257630,20308
GO:0008080	N-acetyltransferase activity	molecular_function	0.0042857	0.042979	34	12456	38	17789	7.47637e+185
GO:0030170	pyridoxal phosphate binding	molecular_function	0.0042915	0.042979	34	12456	38	17789	1.47182e+180
GO:0070279	vitamin B6 binding	molecular_function	0.0042915	0.042979	34	12456	38	17789	7.29472e+180
GO:0016874	ligase activity	molecular_function	0.0043583	0.043518	116	12456	145	17789	56459,22202,353172,207304,212679,70120,50995,19647,319583,63958,234734,100763,107045,216443,56424,229363,229487,71941,109093,85305,27267,70396,67345,224805,70223,231380,68915,104458,270685,226539,83669,23874,28000,51797,66156,102436,74244,68350,75788,329152,66590,70790,73998,226098,12211,14629,69955,382137,209462,66894,105148,16882,14897,226414,217558,16881,71984,140630,14645,97541,107508,16396,1…
GO:0008092	cytoskeletal protein binding	molecular_function	0.0046947	0.044793	142	12456	180	17789	100764,238021,16572,72726,13823,14086,16558,11789,73178,71409,22351,16580,16554,16551,241431,50875,17756,269152,50874,286942,22349,21894,56419,22330,16576,215008,75050,76441,78478,19230,383592,225115,110033,228421,93689,668880,73470,71819,330319,17758,56320,67886,56431,57778,67252,54004,227634,100502766,103268,16574,16560,50876,208846,226251,242687,100034363,17762,13367,269587,54366,109242,69697,…
GO:0003950	NAD+ ADP-ribosyltransferase activity	molecular_function	0.0047628	0.044793	15	12456	15	17789	6.72877e+81
GO:0004435	phosphatidylinositol phospholipase C activity	molecular_function	0.0047646	0.044793	15	12456	15	17789	2.69615e+80
GO:0004629	phospholipase C activity	molecular_function	0.0047646	0.044793	15	12456	15	17789	2.2486e+80
GO:0051213	dioxygenase activity	molecular_function	0.005074	0.046963	25	12456	27	17789	2.14899e+131
GO:0005231	excitatory extracellular ligand-gated ion channel activity	molecular_function	0.0050801	0.046963	25	12456	27	17789	1.84409e+129
1924,110257,12905,387510,73314,66408,68278,66793,71096,20479,11765,76007,19242,13654,19656,13859,232784,24113,433813,381835,102436,17132,224014,75141,67979,71236,13872,240641,26416,246317,15220,230868,320595,72014,76074,387132,319156,407786,69785,105722,232016,67445,64706,227644,67692,16956,57444,226757,71939,320795,22242,194590,243308,56637,225908,13089,12763,14248,11754,93722,100039596,387609,1…

## Sheet: HypoTH+T3vsHypoTH
GO_accession	Description	Term_type	Over_represented_pValue	Corrected_pValue	CAD_item	CAD_list	Bg_item	Bg_list	Gene_names
GO:0044763	single-organism cellular process	biological_process	3.59e-54	3.02e-51	2544	11748	3294	17789	381838,15550,50518,636697,22365,233437,14708,13051,331374,14107,12914,330814,243897,207495,58861,66066,20544,69089,93875,245827,22596,12028,171250,27054,252905,76441,245828,231724,21975,12402,19419,78482,56468,71966,237611,80794,232959,210554,208666,18197,66733,19065,53605,78560,229357,18483,230103,627280,56210,101185,13193,13511,75668,12297,68775,81897,243621,192656,12504,231591,74325,107449,123…
GO:0050789	regulation of biological process	biological_process	2.76e-51	1.86e-48	2343	11748	3024	17789	19387,101095,666085,56220,223227,432770,11836,328967,171247,171199,100043042,112415,67295,380850,12606,18994,81017,210044,109934,13030,50768,17202,668923,667060,226304,100416706,18519,14309,101540,667180,59040,546980,215653,83770,238692,52065,19014,18751,18803,237362,54131,18771,21387,320502,15465,218030,380921,74563,114301,233919,12062,19885,18023,12340,93897,13380,28077,229323,269053,242202,148…
GO:0050794	regulation of cellular process	biological_process	1.59e-50	8.93e-48	2317	11748	2991	17789	107448,23942,211578,637004,278174,13559,71063,665211,18028,54519,387586,102638847,665376,59289,18025,12344,21916,408067,100043403,66808,110326,26382,12576,102633750,12802,20692,54126,545481,12590,17300,19204,16009,56349,626848,434110,67605,378466,171260,21833,217378,53978,442827,22249,14766,233081,76484,21682,434117,72807,66985,171194,404287,215632,105244402,14687,171258,15213,80910,319200,97998,…
GO:0065007	biological regulation	biological_process	8.27e-50	3.98e-47	2374	11748	3075	17789	140741,621430,225471,225642,13361,102635315,18769,21388,74734,228482,217127,269437,19417,211673,104111,16801,212541,224691,75507,113857,57913,78251,66593,113856,252912,67381,100972,77200,195208,26462,170770,320586,14427,277854,15559,18022,56692,66131,171271,244114,14432,232367,11858,226849,14683,22431,380842,214063,53901,382018,108073,18511,211223,100233208,252910,17536,56198,16800,23984,18129,11…
GO:0051716	cellular response to stimulus	biological_process	1.57e-38	5.29e-36	1443	11748	1824	17789	381463,171232,259302,12061,23920,236920,13982,59043,54672,18844,330485,72902,21844,113863,620246,12540,12775,19339,241694,14065,14760,17686,239027,50782,74055,218581,14102,109333,319757,107934,14787,171272,207728,104418,225192,93690,19731,14707,24063,100503710,18754,99633,14370,235854,384522,632671,73707,74206,13543,64450,19367,171200,113851,14678,100036518,12768,435529,223864,213522,619697,25290…
GO:0007154	cell communication	biological_process	2.07e-38	6.34e-36	1400	11748	1765	17789	13491,268739,54611,246710,171240,69721,18574,243628,100042437,99371,24066,18155,171191,224792,544963,628444,53883,243743,14763,20609,117149,14367,213649,11548,22411,18797,19415,23965,13489,171228,13618,16443,69635,13841,104215,384220,16428,18196,71709,108072,11853,19158,641376,22095,101497,54712,23958,21687,54195,18576,11891,171270,93896,108071,242425,52666,228850,21898,14371,171236,19769,22260,5…
GO:0023052	signaling	biological_process	3.84e-38	1.08e-35	1397	11748	1762	17789	319939,16180,637021,271457,18441,230777,19400,21337,26361,65247,72585,19888,18390,77300,245526,94226,320484,252837,51801,65086,171184,24064,22415,252909,16449,211896,241070,216749,224014,14366,27387,18168,226751,56044,18127,100042225,211577,66772,103806,94185,72433,22026,22409,218397,20605,19219,171195,19157,12209,21907,14744,65255,243270,263406,14765,404291,16179,104443,56382,99296,23963,76117,2…
GO:0044700	single organism signaling	biological_process	6.26e-38	1.62e-35	1392	11748	1756	17789	11836,19387,70355,328759,319239,67286,666085,210044,627805,109934,213498,235611,50768,17202,667060,11552,171247,328967,171199,67295,81017,14309,68854,101540,667180,59040,381812,226304,76308,93834,100042777,52065,171201,78816,18803,18751,215653,546980,83770,381853,14676,15465,380921,13869,246313,237362,19411,11848,233919,12062,19885,24058,67169,93897,100312485,74563,242681,56089,380698,19395,13380…
GO:0007165	signal transduction	biological_process	7.22e-37	1.74e-34	1380	11748	1744	17789	13617,22421,243764,240057,19325,21338,13835,17203,219140,68525,212539,208898,11539,18387,18378,22312,207911,14919,18585,65256,18796,233222,14672,26424,13175,171235,50781,113846,71435,20608,71085,81014,54140,14917,68365,22408,17130,625029,14761,171237,102075,14369,76854,213439,17207,638102,69710,226421,19762,13836,78889,72318,628422,171252,270160,216144,18573,22306,620928,20469,223435,20607,93746,…
GO:0035556	intracellular signal transduction	biological_process	3.45e-31	7.26e-29	406	11748	455	17789	29815,59021,76294,142687,18760,104111,211673,19417,23921,76338,224860,65257,269437,19376,19338,74734,19414,13544,11852,170770,236915,106572,50779,217371,195208,19346,19331,235442,100972,217866,18762,214952,19353,16801,18752,18759,79566,213783,12229,107746,78255,69632,11854,68526,18761,19416,217480,56692,277854,18755,53901,70784,58222,114875,73341,14794,11858,328778,20662,66922,94212,271209,16800,…
GO:0044699	single-organism process	biological_process	3.29e-29	6.51e-27	2828	11748	3852	17789	216643,72065,211924,209776,232906,237891,12057,20522,53791,208846,12780,381884,93877,80718,73010,76229,76089,24088,75678,13848,76959,21976,54199,22417,18141,17777,12355,113848,13363,627537,16418,29817,57778,14794,54122,108043,225358,80743,66631,94212,211651,20516,17761,110880,16012,74096,19365,56543,140475,239283,16532,106572,245610,75050,18708,76206,12267,209824,12229,102857,213783,51885,68566,1…
GO:0050896	response to stimulus	biological_process	8.81e-27	1.41e-24	1646	11748	2169	17789	22259,70603,100038941,22412,223254,625823,18846,107831,100042921,11542,13844,19329,170757,245038,11514,227120,66725,16174,170758,56508,67168,12671,100042591,24056,384534,218461,68278,18216,20848,107527,672125,107515,17131,171224,14783,14685,18518,18383,19401,84111,171203,171259,545798,19334,232237,13837,18241,12771,19220,67790,13998,23796,12144,21452,18131,19124,22310,81015,243864,75141,52614,666…
GO:0051179	localization	biological_process	1.73e-26	2.64e-24	917	11748	1150	17789	11927,18738,14525,94045,17827,66226,11827,56807,218035,54338,101488,12298,16649,242126,224674,76983,21871,16485,16512,16774,110834,103694,65221,30962,11769,16531,11832,56643,11441,66384,28254,19679,53331,58800,56315,66712,94229,74919,67489,56041,20528,53881,233836,104681,66113,54403,241919,105886299,71943,69608,94279,240595,16521,11666,20511,21452,67105,16004,56089,12733,19386,20276,53319,74338,1…
GO:0051234	establishment of localization	biological_process	1.59e-25	2.23e-23	898	11748	1128	17789	12121,72144,108907,225644,238384,67064,22785,67804,66144,11936,16514,17876,16149,74463,211480,11443,240776,20498,235415,20536,56379,16522,75751,11765,170756,56325,68942,20509,26570,21366,98396,12890,80979,217337,277973,110876,58226,107371,20192,74105,12033,20514,231252,15567,665119,102339,20539,12290,20336,194352,216225,330953,58244,11829,76582,14407,22318,11774,381686,18669,317717,24060,103468,1…
GO:0006810	transport	biological_process	2.08e-25	2.8e-23	894	11748	1123	17789	76959,67815,20907,17083,20501,67952,239606,11932,60613,246787,18141,171209,28250,20335,20522,328561,216643,319848,11447,22232,20508,381884,12780,64454,56305,64008,320718,66700,20516,66631,16494,56543,53612,74096,73658,140475,72961,67602,53896,16511,110880,110893,17777,20288,269966,80743,56216,54122,66147,14399,108043,73836,20813,20517,68566,57780,328563,237831,11950,11988,102857,98741,108664,1081…
GO:0044765	single-organism transport	biological_process	1.78e-21	1.43e-19	758	11748	953	17789	22067,11449,103098,14394,65114,56356,102443351,227659,170441,20264,13487,641376,233824,66859,239436,16515,108052,72472,16516,18196,70456,225030,71939,11775,12286,27425,11448,67821,15561,75209,22335,11816,106957,16538,268345,21968,64051,12788,338365,100101806,215929,20910,20533,66811,68427,76408,238055,14411,353169,20928,19300,229699,68666,212980,14977,77031,170738,110891,72002,14057,260302,12723,…
GO:0007264	small GTPase mediated signal transduction	biological_process	1.48e-19	1.08e-17	252	11748	283	17789	19730,76089,80837,233328,74194,69834,277360,110279,72065,192786,107338,632971,50753,19354,19769,271457,80718,219140,212539,52666,228850,24001,19325,545156,233046,16800,19345,19762,226421,11891,56044,68328,56212,17207,20403,72433,14163,19157,101497,56437,70784,58222,11853,102075,19158,73341,104886,16653,11858,319642,328778,68365,27387,104215,68708,66922,224014,20662,74012,16443,213783,107746,78255…
GO:0043412	macromolecule modification	biological_process	2.89e-19	2.07e-17	825	11748	1056	17789	213084,276846,15258,21813,17096,76179,22088,69727,192656,17164,57295,233020,216825,140810,381836,231876,67534,214230,14159,12567,19263,70762,12675,381835,235604,23939,13846,225742,19266,13828,22637,66508,329421,63958,227682,382030,230103,19247,628475,213326,381979,70088,241230,384701,19264,17299,16798,23797,16818,271697,53608,68082,66849,320244,53859,14360,21846,69562,75607,83813,67418,13649,5886…
GO:0006468	protein phosphorylation	biological_process	1.22e-18	8.41e-17	496	11748	607	17789	18749,17152,71461,67027,20187,21687,320129,244859,226751,22625,69635,14917,13841,110651,70584,16428,225638,101055864,23954,17691,215303,192292,243659,64293,75669,83984,17179,381921,13175,26401,240505,105787,234878,12795,16451,230735,104318,27206,69171,26404,545156,13835,237459,26400,78891,22137,14919,20459,16001,14182,12704,14191,26918,14083,16202,232533,71751,12978,269224,11352,263803,13549,6718…
GO:0006464	cellular protein modification process	biological_process	1.47e-18	9.35e-17	798	11748	1022	17789	67071,65964,13853,209012,104831,14772,217866,18762,20451,16886,18752,545814,12750,17347,338372,330721,20869,380959,18555,98267,18755,22225,18557,70419,15162,16337,14257,234129,22174,108960,12236,228005,244144,26415,19246,72508,108058,14755,73914,67045,26406,435766,20445,19245,17308,53416,17169,16542,74137,56291,235587,237930,18213,23955,110279,15467,20112,18602,19279,74711,19268,330010,171167,138…
GO:0036211	protein modification process	biological_process	1.47e-18	9.35e-17	798	11748	1022	17789	13853,104831,209012,67071,65964,16886,545814,12750,18752,20451,217866,14772,18762,20869,380959,330721,17347,338372,18557,70419,15162,98267,22225,18755,18555,234129,16337,14257,72508,108058,19246,228005,12236,244144,26415,108960,22174,435766,19245,17308,20445,26406,67045,73914,14755,235587,74137,16542,56291,17169,53416,19268,74711,19279,15467,110279,18602,20112,18213,237930,23955,382083,69035,6674…
GO:0019219	regulation of nucleobase-containing compound metabolic process	biological_process	4.72e-16	2.48e-14	837	11748	1090	17789	14282,18991,240067,60532,74123,211135,66172,27274,12912,235048,234413,12591,17127,21815,435366,12399,78284,15378,22337,22691,219150,193452,21907,321000,59024,225908,18019,107771,24132,12913,547097,236193,77044,100303732,56458,12393,15376,332221,11983,18736,100503353,20183,26386,54169,54153,232791,12394,664987,22700,69792,433791,18508,320484,380669,93681,72068,26424,211961,240041,217732,17975,6680…
GO:0006355	regulation of transcription, DNA-dependent	biological_process	2.81e-15	1.41e-13	816	11748	1065	17789	13813,245572,217127,18029,328572,15370,170734,237775,21388,54201,243906,235682,102635315,243308,26427,211586,22757,224893,77519,12753,100039706,209357,73181,19698,630836,434178,18022,218311,233057,234725,320586,619310,21385,108168395,17342,20852,67381,77200,18227,224691,631624,78251,23957,245525,75507,22758,17536,56198,100043914,22433,100041979,240590,100233208,18511,22688,385674,14239,21386,7159…
GO:2001141	regulation of RNA biosynthetic process	biological_process	2.81e-15	1.41e-13	816	11748	1065	17789	22768,67607,22759,170938,107503,449000,14009,73233,382118,22717,213011,57745,70408,12395,12915,17937,11911,381405,214779,100043034,213389,22698,12608,223669,19697,630579,67692,21685,71131,330463,100043761,12355,245595,13712,56501,22431,53417,101835,170763,13711,74352,17536,56198,22433,100043914,100233208,240590,100041979,22688,18511,385674,14239,71592,21386,234725,233057,320586,619310,17342,21385…
GO:0051252	regulation of RNA metabolic process	biological_process	3.55e-15	1.75e-13	817	11748	1067	17789	72667,12611,431706,15377,218772,11624,232853,238693,17684,71059,56484,210104,69228,665001,237411,72556,243905,233060,94112,170828,18998,328274,18027,57246,107889,381319,17268,23871,102633156,100302432,408062,16658,12914,27056,18996,15208,21676,238722,14462,433804,269610,69257,18987,239546,15220,73610,26423,66233,14465,18509,353208,81703,21410,240034,22756,100043387,14463,19725,103537,30051,244349…
GO:0010468	regulation of gene expression	biological_process	5.83e-15	2.77e-13	831	11748	1088	17789	26423,66233,18509,14465,81703,21410,353208,73610,14463,100043387,240034,22756,234358,210162,629016,103537,19725,30051,244349,18584,210853,385312,66410,104349,18993,17870,104394,56449,56404,16371,544922,407812,71640,242620,434377,320995,22755,20675,20466,244713,231991,432769,232855,319615,20851,195531,21384,13661,21678,225998,235907,229599,619289,382019,12611,15377,431706,218772,72667,232853,23869…
GO:0010556	regulation of macromolecule biosynthetic process	biological_process	5.93e-15	2.77e-13	826	11748	1081	17789	55994,108112,22767,387586,102638847,216177,13559,665211,71063,626832,70227,18028,192231,23942,278174,15229,234362,237339,66808,18538,17132,22696,74400,100043403,408067,50916,72128,208146,17933,17978,245368,19726,100043468,18025,627901,21677,77117,83557,240064,22654,18507,78619,72033,626316,102633750,108167848,56525,16391,666311,381463,15214,378466,226182,21833,71241,626848,15206,20893,13982,10004…
GO:0031326	regulation of cellular biosynthetic process	biological_process	5.93e-15	2.77e-13	826	11748	1081	17789	11908,18142,13555,16477,14390,53970,22754,18510,17979,72230,13983,18503,17133,12592,107815,11819,56869,52712,100043772,11835,433586,233490,20586,75424,14464,13875,65020,71137,408065,52502,16918,235028,11863,54446,69930,240063,26927,21375,242747,18143,14236,170936,272347,228839,240120,56222,73274,13999,72504,22746,381379,15500,209446,240066,74670,384281,229542,245305,12609,72139,73451,19883,17128,…
GO:2000112	regulation of cellular macromolecule biosynthetic process	biological_process	5.93e-15	2.77e-13	826	11748	1081	17789	54723,73247,105859,18185,16476,239652,22751,93681,380669,18508,668039,217732,17975,240041,211961,26424,72068,327987,68837,244721,381067,78921,22710,77652,21426,436240,17130,56296,22689,69870,54650,18109,235050,210583,13557,214669,11910,338354,107932,103806,72154,69234,22026,260298,17537,15227,321000,21907,193452,107771,18019,59024,225908,66172,74123,211135,240067,18991,14282,22691,219150,22337,78…
GO:0009889	regulation of biosynthetic process	biological_process	8.68e-15	4e-13	826	11748	1082	17789	14235,270118,73229,14536,18124,54123,66213,19668,20181,20465,18021,622408,100041677,74120,628308,19013,100009600,73430,69504,319535,276770,245174,83925,667666,15228,19018,27224,240038,13685,329650,22059,620419,217166,52679,54601,17129,57782,20846,215031,100039551,14234,22678,208076,224585,21679,100043381,23872,108655,19009,18667,64290,237412,17301,76199,238690,14531,78703,69256,234959,20182,14605…
GO:0031323	regulation of cellular metabolic process	biological_process	9.22e-15	4.19e-13	867	11748	1140	17789	210503,18994,12606,380850,112415,100043042,18024,19401,668923,21343,14247,79362,232430,22643,21408,329934,13709,101095,17131,57765,432770,243834,223227,20848,56220,238692,100642166,15218,668620,11909,30944,19014,18519,232334,17928,11864,100416706,102639598,408068,330502,22259,71375,414758,102637366,241944,100503584,100039060,74570,269585,11865,545938,19664,18023,19885,70081,235626,18505,22690,232…
GO:0080090	regulation of primary metabolic process	biological_process	9.63e-15	4.32e-13	857	11748	1126	17789	14011,100978,71508,108961,17927,330788,21781,675812,18504,17863,102162,17977,64050,67985,100271882,13710,330361,20664,272322,16372,14233,14815,99334,13876,29808,100216455,20186,22123,21807,387131,18997,29871,50796,30942,22750,109889,67367,192191,223922,20850,13714,81601,64144,55927,78703,69256,14531,238690,76199,110794,20182,14605,234959,19009,108655,23872,21679,100043381,224585,17301,237412,6429…
GO:0051171	regulation of nitrogen compound metabolic process	biological_process	1.12e-14	4.97e-13	856	11748	1125	17789	432770,243834,223227,56220,20848,22643,21408,329934,101095,13709,17131,57765,19401,668923,21343,14247,79362,232430,18994,210503,12606,380850,112415,100043042,18024,408068,330502,22259,71375,18519,232334,17928,11864,100416706,102639598,668620,11909,30944,19014,238692,100642166,15218,170740,69020,268670,218030,27386,665913,19411,13713,18771,54131,21387,114142,228876,26380,67911,545938,19664,18023,2…
GO:0019222	regulation of metabolic process	biological_process	1.16e-14	5.07e-13	880	11748	1159	17789	15220,239546,69257,18987,269610,14462,433804,238722,21676,18996,15208,27056,12914,16658,408062,100302432,102633156,23871,381319,17268,57246,107889,18027,18998,328274,170828,94112,243905,233060,72556,237411,665001,18015,69228,210104,71059,56484,17684,238693,232853,66849,11624,218772,15377,431706,12611,22084,72667,57441,13661,382030,21384,195531,229599,619289,382019,235907,225998,21678,66508,231991…
GO:0060255	regulation of macromolecule metabolic process	biological_process	6.63e-14	2.72e-12	849	11748	1120	17789	193452,321000,21907,107771,225908,59024,18019,66172,74123,211135,14282,240067,60532,18991,12399,435366,22691,219150,22337,78284,15378,12912,27274,17127,21815,234413,235048,12591,54169,20183,26386,664987,12394,433791,69792,22700,74108,232791,236193,24132,547097,75901,12913,18736,100503353,12393,56458,77044,100303732,332221,15376,73247,54723,18185,16476,105859,74133,69171,239652,22751,380669,93681,…
GO:0006811	ion transport	biological_process	6.83e-14	2.77e-12	375	11748	461	17789	14402,108015,12298,16512,16485,21871,57014,14406,14408,94045,11927,74252,20499,20531,63873,14400,14401,216441,225865,16504,16531,12295,110834,22065,30962,241919,227632,20544,54403,218756,11441,94229,56315,58800,58176,16492,110304,20276,72413,54652,83704,20511,94279,16521,240595,12733,224661,94280,231602,504186,12287,16533,12460,58802,11964,233979,269356,226025,99738,16493,16513,328133,268878,2027…
GO:0016070	RNA metabolic process	biological_process	1.13e-13	4.55e-12	1042	11748	1396	17789	272396,78895,93681,211961,99730,668039,217732,16476,69684,70560,73247,239652,22751,74133,107932,338354,18789,103806,69234,68731,11910,260298,22026,244721,78921,77652,320271,327987,271842,381802,22689,18109,54650,210583,20019,240067,60532,18991,15438,14282,71984,67465,69241,66172,23856,17127,21815,21744,234413,235048,22375,78284,12399,21907,18019,71989,71941,75901,19076,236193,192196,20227,12393,5…
GO:0032774	RNA biosynthetic process	biological_process	4.06e-12	1.55e-10	877	11748	1172	17789	101056073,18986,268417,387132,244556,12396,22061,69944,19696,353187,100041433,20933,228980,56707,233987,110784,217082,327963,22260,20024,229663,13170,19015,74238,67733,236366,20467,71163,23958,235047,641376,11622,216848,13716,243963,14241,73729,100039123,192651,100316903,71591,67219,100041581,330301,13865,100040944,59057,76365,269997,226641,636741,15221,66420,233893,21405,104348,60611,67235,24383…
GO:0051056	regulation of small GTPase mediated signal transduction	biological_process	4.86e-12	1.84e-10	93	11748	98	17789	99326,219140,228850,24001,74206,207212,52666,545156,269608,243621,110279,102098,227377,107338,22324,50753,13605,328967,277360,232237,381112,71972,213498,109934,245666,213522,77669,244668,224014,20662,215632,102075,19158,223254,73341,17207,20403,14163,101497,71704,110596,19157,19418,16800,22325,622434,54324,230972,74018,72318,30938,56784,442801,20663,110351,263406,22084,16801,57257,20469,74002,236…
GO:0006351	transcription, DNA-dependent	biological_process	5.31e-12	1.98e-10	875	11748	1170	17789	320586,619310,234725,233057,20852,21385,17342,108168395,77200,67381,23957,78251,631624,216151,75507,245525,22758,224691,18227,78929,22757,224893,100039706,73181,209357,19698,12753,77519,218311,18022,630836,434178,54201,235682,243906,237775,170734,21388,243308,102635315,21399,26427,211586,13813,245572,15370,328572,217127,18029,24074,22759,67607,170938,22768,14009,449000,107503,213011,382118,22717,…
GO:0007265	Ras protein signal transduction	biological_process	2.9e-10	9.39e-09	82	11748	87	17789	16443,69632,213783,53972,73728,232227,54126,213649,74002,236915,223435,235633,56349,109294,21844,75547,72318,20663,442801,30938,263406,57257,16801,211673,19417,109904,99371,234094,380698,19159,234353,230098,13998,226970,72754,268739,26382,71972,381112,213498,109934,245666,213522,328967,277360,232237,102098,269608,243621,110279,227377,107338,22324,50753,13605,219140,24001,52666,207212,545156,16800…
GO:0046578	regulation of Ras protein signal transduction	biological_process	2.9e-10	9.39e-09	82	11748	87	17789	207212,52666,24001,545156,219140,50753,13605,269608,243621,110279,102098,22324,107338,227377,277360,232237,328967,245666,213522,71972,381112,109934,213498,20662,224014,77669,223254,73341,215632,19158,102075,110596,71704,19157,101497,19418,20403,17207,14163,74018,230972,16800,622434,54324,22325,57257,16801,72318,263406,442801,20663,30938,75547,109294,21844,223435,235633,74002,236915,56349,54126,23…
GO:0055085	transmembrane transport	biological_process	6.07e-10	1.93e-08	385	11748	492	17789	11988,16438,11950,237831,98741,108664,16490,20517,68526,16500,16506,171405,217721,207565,333329,50934,94282,27413,58207,56365,11306,16532,331004,226922,241794,12725,240638,244562,18438,63993,64177,277468,24046,14385,20273,69309,208169,94249,20274,20503,109108,109342,243755,15247,228139,213332,55961,227059,11957,20530,20537,236149,74915,20526,20501,239606,56517,20520,234076,20927,15166,210148,2416…
GO:0006793	phosphorus metabolic process	biological_process	2.45e-09	7.42e-08	748	11748	1009	17789	66461,103850,244859,54195,21687,67027,20187,18749,17179,23959,75669,64293,243659,252864,18718,101055864,225638,72349,224129,16428,69635,13841,353204,22625,271639,104318,27425,230735,234878,240505,110639,26401,381921,52504,105352,16001,67292,78891,22137,22171,26400,67556,27206,545156,26404,269224,71751,544963,14083,11512,16202,245857,26918,14191,232889,13807,11674,78928,26407,232944,269614,226265,…
GO:0006796	phosphate-containing compound metabolic process	biological_process	2.45e-09	7.42e-08	748	11748	1009	17789	69181,333050,13666,11482,12545,75456,50773,19139,12168,20779,59041,13869,19249,14255,19877,268566,170755,13144,329502,18642,102626,58800,231580,19094,24086,20815,226896,12799,380698,19275,13400,19262,19260,231637,16452,26405,12566,72084,17165,22115,432530,11477,216965,12361,210044,11964,54721,14184,27388,230163,68352,26411,13837,12323,78943,11481,19248,674895,622486,11836,117229,19259,66725,27392…
GO:0016310	phosphorylation	biological_process	3.32e-09	9.98e-08	531	11748	701	17789	69847,26385,399510,207565,13631,14751,245269,18607,18761,12571,59125,27263,11676,12229,18759,238564,104175,75770,26396,15257,74653,26563,71742,17005,269881,83560,54369,19878,26413,72112,18102,20111,22114,18760,68961,50883,26408,22241,101320,18769,18938,13839,19216,18647,11651,240880,332110,11652,12747,13848,270190,100043638,208583,18004,223775,213452,140859,19106,29869,18767,269275,20877,140780,1…
GO:0009100	glycoprotein metabolic process	biological_process	3.95e-09	1.15e-07	70	11748	74	17789	20452,50935,272411,73068,11872,20443,20445,17308,97440,20444,102637973,235587,232984,20450,328417,109978,59007,117592,20440,68273,320011,14348,54616,17309,20441,20451,73379,380959,20446,99011,14043,227327,54218,108105,231727,97884,11871,14347,72297,58193,240119,225742,103963,68292,329777,241230,26877,20442,11545,20447,20014,26938,14042,26878,217734,20454,66435,171167,93961,53625,20449,11546,13200…
GO:0009101	glycoprotein biosynthetic process	biological_process	5.67e-09	1.59e-07	69	11748	73	17789	72297,58193,225742,240119,231727,14347,11871,97884,241230,26877,20442,329777,103963,68292,20454,171167,66435,20447,11545,14042,217734,26878,20014,26938,56219,54613,20448,11870,14345,16430,93961,53625,20449,26879,11546,13200,73068,272411,11872,20443,20452,50935,20450,328417,232984,109978,102637973,235587,97440,17308,20445,20444,54616,20441,17309,320011,14348,73379,20451,68273,20440,117592,54218,14…
GO:0006629	lipid metabolic process	biological_process	5.86e-09	1.63e-07	160	11748	189	17789	114875,233537,18718,243078,15107,15496,18802,239318,66190,66569,101055671,14593,20250,67292,11430,18796,71365,67556,628236,13244,18795,241062,211429,75847,228151,67452,94224,215615,70059,76943,212862,619326,18194,78928,93732,19156,328035,68631,668106,403178,269615,78925,53897,224860,269437,15493,70325,329065,53357,14755,381236,15494,232889,66853,30049,78390,15495,18700,619597,230101,241274,433091…
GO:0016192	vesicle-mediated transport	biological_process	7.93e-09	2.19e-07	105	11748	118	17789	107371,106489,53620,100226,77573,27054,75914,22319,99683,50797,12847,66629,73122,74105,105504,11771,76983,108011,54161,60409,102639650,13852,218035,66226,245828,218811,20912,68566,233405,70349,20334,74190,106039,11776,11765,22365,67727,69608,59005,260302,20909,67489,56041,277978,74463,66712,20910,68159,53331,53330,229593,71770,11772,11764,211446,56389,71732,226744,238123,11766,20333,56418,56395,1…
GO:0007266	Rho protein signal transduction	biological_process	1.17e-08	3.07e-07	67	11748	71	17789	19417,109904,234094,380698,13998,230098,26382,268739,72754,226970,213783,69632,16443,53972,213649,54126,56349,223435,235633,236915,75547,109294,21844,263406,20663,30938,442801,57257,16801,622434,54324,22325,16800,74018,230972,14163,17207,20403,19418,101497,71704,110596,102075,73341,223254,77669,20662,224014,109934,213498,381112,71972,213522,328967,277360,232237,22324,227377,269608,102098,110279,1…
GO:0035023	regulation of Rho protein signal transduction	biological_process	1.17e-08	3.07e-07	67	11748	71	17789	213522,213498,109934,71972,381112,277360,232237,328967,13605,227377,22324,269608,110279,102098,545156,24001,207212,52666,219140,230972,74018,22325,54324,622434,16800,19418,71704,110596,101497,14163,20403,17207,73341,223254,102075,20662,224014,77669,53972,69632,213783,16443,213649,54126,109294,21844,75547,56349,236915,223435,235633,16801,57257,442801,20663,30938,263406,109904,19417,234094,230098,1…
GO:0023051	regulation of signaling	biological_process	1.23e-08	3.22e-07	128	11748	148	17789	232237,328967,213522,245666,381112,71972,109934,213498,207212,74206,13877,99326,18518,13605,243621,269608,102098,22324,227377,114716,71704,110596,19418,71609,245684,74018,230972,66508,622434,54324,100042777,22325,56811,77669,244668,223254,215632,74747,217692,54126,232227,241694,73728,14525,53972,19229,68010,22084,20663,56784,30938,67605,75547,21844,109294,66849,235633,74002,56349,50540,234094,240…
GO:0042221	response to chemical stimulus	biological_process	1.37e-08	3.52e-07	84	11748	92	17789	14603,13982,21907,18438,67605,330485,21833,218772,26381,26380,68010,381463,23957,11819,19411,11835,18227,19885,17125,94045,17129,207565,22337,15378,18439,17127,13983,217166,20181,21452,20183,18436,14536,17126,18124,50518,230784,19013,11604,11614,15370,55994,58245,140742,228139,14815,22260,19015,67473,75747,70433,77996,20186,26423,110784,17131,18440,19883,17128,19401,353187,380701,11603,231602,264…
GO:0009966	regulation of signal transduction	biological_process	1.62e-08	4.11e-07	127	11748	147	17789	16801,57257,68010,22084,442801,56784,20663,30938,110351,263406,72318,21844,109294,75547,67605,50540,56349,74002,20469,236915,223435,66849,170770,235633,213649,70419,232227,56692,241694,217692,54126,114715,53972,14525,73728,54409,19229,69632,213783,16443,26382,268739,226970,72754,13380,230098,13998,19159,56089,234353,380698,234094,24066,99371,14083,109904,380711,19417,211673,24063,66743,73284,1387…
GO:0010646	regulation of cell communication	biological_process	1.62e-08	4.11e-07	127	11748	147	17789	13380,268739,26382,226970,72754,19159,56089,234353,380698,230098,13998,24066,99371,14083,234094,380711,19417,24063,211673,109904,56784,30938,442801,110351,20663,263406,72318,16801,57257,22084,68010,50540,56349,74002,20469,236915,170770,66849,235633,223435,109294,21844,75547,67605,213649,70419,56692,232227,241694,54126,217692,69632,19229,213783,16443,53972,114715,73728,14525,54409,244668,77669,224…
GO:0010033	response to organic substance	biological_process	1.69e-08	4.24e-07	75	11748	81	17789	11604,19013,11614,15370,228139,58245,55994,20181,18436,20183,50518,18124,14536,17126,17125,19885,94045,15378,18439,207565,22337,17129,13983,217166,17127,21907,13982,330485,67605,18438,26380,26381,21833,218772,18227,11835,19411,68010,11819,381463,23957,26379,13864,225998,66508,30942,18171,22026,22044,23958,641376,12355,20182,13865,22259,21834,14683,17130,18667,22025,17128,19883,18440,353187,19401,…
GO:0006486	protein glycosylation	biological_process	3.44e-08	8.26e-07	64	11748	68	17789	108105,227327,54218,99011,380959,20446,20451,73379,320011,14348,17309,20441,20440,117592,68273,235587,102637973,232984,20450,328417,109978,20444,17308,20445,97440,11872,20443,272411,73068,50935,20452,16430,20448,11870,14345,54613,11546,13200,26879,93961,53625,20449,66435,171167,20454,20014,26938,217734,26878,11545,20447,20442,26877,241230,68292,103963,329777,240119,225742,72297,97884,11871,14347,…
GO:0043413	macromolecule glycosylation	biological_process	3.44e-08	8.26e-07	64	11748	68	17789	99011,20446,380959,108105,54218,227327,68273,20440,117592,20451,73379,17309,20441,14348,320011,20444,97440,20445,17308,109978,232984,328417,20450,235587,102637973,50935,20452,20443,11872,73068,272411,26879,13200,11546,53625,20449,93961,14345,20448,11870,16430,54613,26878,217734,20014,26938,20447,11545,171167,66435,20454,329777,103963,68292,20442,26877,241230,14347,11871,97884,231727,225742,240119…
GO:0070085	glycosylation	biological_process	3.44e-08	8.26e-07	64	11748	68	17789	50935,20452,20443,11872,73068,272411,20444,97440,20445,17308,109978,328417,20450,232984,235587,102637973,68273,20440,117592,73379,20451,20441,17309,14348,320011,99011,20446,380959,108105,54218,227327,14347,11871,97884,231727,225742,240119,72297,329777,68292,103963,20442,26877,241230,26878,217734,26938,20014,20447,11545,171167,66435,20454,26879,13200,11546,53625,20449,93961,14345,11870,20448,16430…
GO:0048583	regulation of response to stimulus	biological_process	3.49e-08	8.28e-07	134	11748	157	17789	114715,54409,213783,69632,16443,213649,56692,70419,170770,223435,236915,20469,16801,57257,263406,442801,110351,72318,109904,72699,19417,380711,211673,72512,99371,24066,14083,268739,72754,50781,23900,67154,277360,24064,51801,75747,50753,107338,110279,545156,73284,66743,52666,228850,24001,219140,234130,16800,101497,19157,14163,20403,17207,73341,215748,19158,102075,20662,224014,56743,14525,73728,539…
GO:0009719	response to endogenous stimulus	biological_process	4.7e-08	1.11e-06	72	11748	78	17789	218772,21833,26380,26381,68010,381463,23957,11819,19411,11835,18227,13982,21907,18438,17129,22337,207565,18439,15378,17127,217166,13983,19885,17125,94045,17126,14536,18124,50518,20181,20183,18436,15370,55994,228139,19013,11604,11614,20186,26423,17131,110784,14815,22260,19015,11603,231602,26424,18440,19883,17128,19401,353187,18667,17130,22025,20182,12355,21834,14683,22259,13865,23958,22044,22026,6…
GO:0030001	metal ion transport	biological_process	4.82e-08	1.13e-06	99	11748	112	17789	16531,11419,241118,100502876,277468,24046,110876,11945,114644,74252,20273,16532,16523,20192,12295,16439,53945,84036,12298,16524,237831,12296,16438,98741,11927,11931,20500,16500,214922,56379,72413,16522,20276,140492,20530,11933,20269,240776,74552,227059,14977,72002,16521,233280,243755,227632,69806,76273,18821,55961,223473,16492,211480,20274,68427,16514,65113,16520,20278,20191,16519,16534,11979,214…
GO:0014070	response to organic cyclic compound	biological_process	7.67e-08	1.78e-06	57	11748	60	17789	94045,19401,353187,19885,18440,19883,231602,26424,217166,13983,15378,18439,207565,22337,18438,19015,13982,14815,21907,22260,19411,11835,381463,23957,11819,110784,18227,20186,21833,218772,26423,26380,26381,30942,18171,225998,13864,11614,26379,19013,228139,641376,23958,15370,22026,20183,13865,22259,18436,21834,20182,12355,20181,22025,18124,18667,14536
GO:0007155	cell adhesion	biological_process	9.31e-08	2.13e-06	161	11748	194	17789	93712,93888,12555,227485,19713,239096,93892,105298,12556,12564,93883,93884,225256,18081,53883,13507,170677,12950,12505,12557,13003,329628,12558,93881,11595,17311,241201,12552,21827,192164,93713,13004,21826,12561,114332,192161,18526,192188,12481,20750,64085,12386,93711,215654,93710,245578,75599,93891,216033,192163,13505,116731,208777,12941,93699,93724,93877,18530,12565,382111,12937,192187,93880,93…
GO:0022610	biological adhesion	biological_process	9.31e-08	2.13e-06	161	11748	194	17789	12386,64085,20750,192188,18526,12481,21826,13004,114332,192161,12561,93713,192164,21827,12552,17311,241201,12558,93881,11595,12557,329628,13003,12505,12950,170677,13507,53883,18081,225256,93884,93883,12556,12564,105298,93892,239096,227485,93888,12555,19713,93712,93700,93706,21894,12554,94212,13510,219257,93893,93876,12939,232370,93703,69398,17123,233651,93890,93717,93885,12560,211924,93879,16772,…
GO:0051259	protein oligomerization	biological_process	1.67e-07	3.75e-06	64	11748	69	17789	22059,16485,192192,16506,16500,16490,72565,98741,240444,238076,328424,226823,279499,16491,106931,233877,241794,382571,70382,16492,58800,69259,100900,70461,240595,242151,243043,51960,239217,212919,16508,99738,26434,622320,226025,225997,16493,22061,67498,74343,21927,17364,111368,16538,268345,330171,56543,16539,383348,233529,16502,216858,66733,22062,16494,67516,207474,225030,382056,19122,105440,2331…
GO:0009725	response to hormone stimulus	biological_process	2.3e-07	5.12e-06	54	11748	57	17789	110784,18227,23957,381463,11819,19411,11835,26381,26423,26380,21833,218772,20186,19015,22260,21907,14815,13982,217166,26424,13983,11603,22337,15378,353187,19401,19883,19885,22025,50518,14536,18667,18124,21834,14683,13865,22259,20183,12355,20181,20182,641376,22026,15370,23958,22044,11614,13864,225998,18171,30942,19013,11604,26379
GO:0090304	nucleic acid metabolic process	biological_process	2.56e-07	5.59e-06	1174	11748	1647	17789	22750,338371,109889,67367,29871,387131,50796,81601,55927,192191,223922,110794,234959,69256,14531,238690,18667,19009,21679,108655,56629,108961,17927,102162,69163,330361,20664,272322,208084,16372,14815,67985,21807,99334,13876,100009600,19013,67053,68205,20181,68916,66213,14536,72774,15115,208076,14234,100039551,215031,26939,54601,66926,52679,620419,213109,240038,27224,667666,15228,110960,245174,268…
GO:0032870	cellular response to hormone stimulus	biological_process	3.31e-07	7.14e-06	53	11748	56	17789	15378,22337,26424,217166,13983,11603,19883,19885,353187,19401,26380,26423,26381,20186,218772,21833,110784,18227,19411,11835,381463,23957,11819,21907,22260,13982,14815,19015,22026,22044,15370,23958,641376,11604,19013,26379,225998,13864,11614,30942,18171,50518,18124,14536,18667,22025,12355,20181,20182,22259,13865,21834,20183
GO:0009755	hormone-mediated signaling pathway	biological_process	4.76e-07	1.02e-05	52	11748	55	17789	26379,11604,19013,30942,18171,13864,225998,11614,22044,15370,23958,22026,641376,20182,12355,20181,20183,13865,22259,21834,18124,14536,18667,50518,22025,19885,19883,19401,353187,15378,22337,13983,26424,217166,13982,14815,21907,22260,19015,20186,218772,21833,26380,26423,26381,19411,11835,381463,11819,23957,18227,110784
GO:0070887	cellular response to chemical stimulus	biological_process	6.87e-07	1.44e-05	64	11748	70	17789	17131,110784,26423,20186,19015,22260,14815,26424,11603,353187,19401,17128,19883,22025,17130,18667,13865,22259,21834,12355,20182,641376,22026,22044,23958,225998,13864,66508,30942,18171,26379,18227,19411,11835,23957,11819,381463,68010,26381,26380,21833,218772,67605,21907,13982,13983,217166,17127,15378,22337,17129,17125,19885,50518,18124,17126,14536,20183,20181,55994,15370,11614,11604,19013
GO:0071310	cellular response to organic substance	biological_process	6.87e-07	1.44e-05	64	11748	70	17789	22260,14815,19015,26423,20186,110784,17131,17128,19883,353187,19401,26424,11603,12355,20182,13865,22259,21834,17130,18667,22025,26379,225998,13864,66508,30942,18171,22026,22044,23958,641376,21907,13982,67605,26380,26381,218772,21833,18227,11835,19411,23957,381463,68010,11819,17125,19885,15378,22337,17129,217166,13983,17127,20181,20183,50518,18124,14536,17126,11604,19013,11614,15370,55994
GO:0051260	protein homooligomerization	biological_process	8.32e-07	1.73e-05	55	11748	59	17789	243043,16485,51960,16506,192192,212919,16508,16500,239217,622320,99738,26434,16493,16490,98741,67498,74343,240444,328424,238076,226823,111368,21927,279499,16491,241794,268345,233877,16538,106931,330171,382571,16539,56543,16502,383348,233529,216858,66733,70382,16494,67516,16492,69259,70461,207474,225030,105440,19122,382056,240595,233107,242151,71393,72844
GO:0071495	cellular response to endogenous stimulus	biological_process	9.55e-07	1.97e-05	63	11748	69	17789	15378,22337,17129,217166,26424,13983,17127,11603,17128,19883,17125,19885,353187,19401,26380,26423,26381,20186,21833,218772,18227,110784,17131,19411,11835,381463,68010,23957,11819,21907,22260,13982,14815,19015,22026,22044,23958,15370,641376,55994,11604,19013,26379,13864,225998,66508,11614,30942,18171,17130,50518,18124,17126,18667,14536,22025,20181,12355,20182,13865,22259,21834,20183
GO:0016337	cell-cell adhesion	biological_process	1.19e-06	2.44e-05	114	11748	135	17789	93700,219228,93706,12942,381409,13512,12563,104010,12554,13510,94212,219257,93893,93887,12939,93882,93876,232370,16769,69398,93703,53601,54216,13506,233651,93890,93714,73173,270120,93717,93885,12560,211924,93879,93722,65945,93880,12550,13511,12937,93708,18530,93877,12565,93723,12941,93724,93699,116731,238939,13505,192163,12614,245578,75599,93716,93891,93711,93710,93702,215654,353235,64085,107934,…
GO:0033993	response to lipid	biological_process	1.41e-06	2.77e-05	49	11748	52	17789	15370,23958,22026,641376,26379,19013,30942,18171,225998,13864,11614,18124,14536,18667,22025,20182,12355,20181,20183,13865,22259,21834,15378,22337,217166,26424,13983,19885,19883,19401,353187,20186,21833,218772,26423,26380,26381,11835,19411,381463,23957,11819,18227,110784,13982,14815,21907,22260,19015
GO:0043401	steroid hormone mediated signaling pathway	biological_process	1.41e-06	2.77e-05	49	11748	52	17789	18124,14536,18667,22025,12355,20181,20182,13865,22259,21834,20183,22026,15370,23958,641376,19013,26379,225998,13864,11614,30942,18171,26380,26423,26381,20186,218772,21833,110784,18227,11835,19411,23957,381463,11819,21907,22260,13982,14815,19015,15378,22337,217166,26424,13983,19883,19885,353187,19401
GO:0048545	response to steroid hormone stimulus	biological_process	1.41e-06	2.77e-05	49	11748	52	17789	20183,21834,22259,13865,20182,12355,20181,22025,18667,14536,18124,18171,30942,11614,225998,13864,26379,19013,641376,23958,15370,22026,19015,14815,13982,22260,21907,23957,381463,11819,11835,19411,18227,110784,218772,21833,20186,26423,26380,26381,19401,353187,19885,19883,13983,26424,217166,22337,15378
GO:0071383	cellular response to steroid hormone stimulus	biological_process	1.41e-06	2.77e-05	49	11748	52	17789	26424,13983,217166,22337,15378,353187,19401,19883,19885,18227,110784,11819,381463,23957,11835,19411,26423,26381,26380,218772,21833,20186,19015,22260,21907,14815,13982,641376,22026,23958,15370,11614,225998,13864,18171,30942,19013,26379,22025,18667,14536,18124,21834,13865,22259,20183,12355,20181,20182
GO:0071396	cellular response to lipid	biological_process	1.41e-06	2.77e-05	49	11748	52	17789	18124,18667,14536,22025,12355,20181,20182,13865,22259,21834,20183,22026,15370,23958,641376,19013,26379,13864,225998,11614,30942,18171,26423,26380,26381,20186,218772,21833,18227,110784,19411,11835,11819,381463,23957,21907,22260,13982,14815,19015,15378,22337,13983,26424,217166,19883,19885,353187,19401
GO:0071407	cellular response to organic cyclic compound	biological_process	1.41e-06	2.77e-05	49	11748	52	17789	20181,12355,20182,13865,22259,21834,20183,18124,18667,14536,22025,19013,26379,225998,13864,11614,30942,18171,22026,15370,23958,641376,21907,22260,13982,14815,19015,26380,26423,26381,20186,218772,21833,110784,18227,11835,19411,23957,381463,11819,19883,19885,353187,19401,15378,22337,217166,26424,13983
GO:0007156	homophilic cell adhesion	biological_process	1.53e-06	2.94e-05	113	11748	134	17789	18526,279653,93709,353236,192161,11994,12561,353235,64085,107934,93881,12558,12557,93715,14107,329628,12936,93874,93889,93713,12562,93878,192164,12552,93875,93705,241201,13507,245827,53883,93707,320873,225256,211712,23836,353234,170677,93704,353237,93892,22295,239096,227485,93888,12555,19713,93712,100534287,93884,93883,12564,12556,93701,381409,13512,12563,93700,219228,93706,12942,93876,93887,9388…
GO:0040007	growth	biological_process	2.88e-06	5.51e-05	47	11748	50	17789	330723,110075,16009,56213,13590,12164,18081,16007,320202,75426,12165,16008,16006,16323,22403,18133,664779,12162,242316,29817,16324,16011,14561,12156,14432,14563,29862,21803,327743,16010,66175,12161,71690,12159,12803,21808,16012,12160,50766,12154,14219,71924,12163,17700,78558,22402,21809
GO:1901362	organic cyclic compound biosynthetic process	biological_process	5.45e-06	0.0001024	1001	11748	1404	17789	18023,19664,545938,19885,70081,235626,17125,232966,67065,22690,18505,102637366,414758,100039060,19139,100503584,241944,269585,74570,50773,75456,11865,69020,64424,170740,218030,268670,27386,665913,21387,54131,18771,101502,19411,13713,114142,18642,67911,69920,26380,268566,228876,14460,210719,245109,22693,212276,378435,226139,68703,12013,56771,100043456,52040,20847,210105,12799,19724,57230,18992,546…
GO:0006461	protein complex assembly	biological_process	6.79e-06	0.00012479	110	11748	132	17789	242151,12344,240595,74192,70461,21916,100503890,50874,100900,20422,233276,69259,58800,16492,70382,56378,68493,66311,14083,382571,320502,241794,233877,66995,106931,16491,279499,226823,67771,328424,238076,240444,98741,72565,19229,51885,328580,50876,16490,68566,16500,50875,12340,192192,16506,219072,76709,16485,22059,66998,72844,18197,71393,18196,233107,105440,19122,382056,20892,225030,207474,93677,6…
GO:0070271	protein complex biogenesis	biological_process	6.79e-06	0.00012479	110	11748	132	17789	66998,22059,16485,76709,192192,16506,219072,16500,50875,12340,68566,51885,328580,50876,16490,98741,72565,19229,240444,328424,238076,226823,67771,279499,16491,241794,320502,233877,106931,66995,382571,14083,56378,68493,66311,70382,58800,16492,233276,20422,69259,100503890,70461,21916,50874,100900,74192,240595,12344,242151,259279,243043,66296,12343,51960,211556,110135,246782,212919,16508,239217,62232…
GO:0007267	cell-cell signaling	biological_process	9.61e-06	0.00017395	39	11748	41	17789	###############################################################################################################################################################################################################################################################
GO:0018130	heterocycle biosynthetic process	biological_process	1.15e-05	0.0002064	989	11748	1390	17789	73707,17877,212569,18612,449521,384763,212281,67370,233168,101604,17936,54352,83993,208647,270004,230162,22776,22775,18032,15375,66500,59027,18018,74469,545471,218832,17869,14283,666584,15213,110805,228790,232784,15260,104156,22718,626391,105244402,75316,380855,66467,72180,54391,20371,11515,15223,14534,17425,72807,100504263,26379,14238,72306,269870,227606,378466,226182,21833,67005,666311,381463,1…
GO:0070647	protein modification by small protein conjugation or removal	biological_process	1.43e-05	0.00025555	69	11748	79	17789	83563,19647,22284,30940,59025,112694759,327799,76800,74996,13531,244144,17847,28035,74270,57775,54651,225164,22225,75763,72607,22217,252870,77593,170822,227334,75083,235441,22258,140629,76302,329908,207304,100756,24110,625530,99526,74112,15204,74256,30941,53376,67588,384701,71472,140630,224836,56424,216835,63958,72137,170707,74841,72344,236733,72106,13532,22224,78787,22200,14479,237898,319651,216…
GO:0007166	cell surface receptor signaling pathway	biological_process	1.58e-05	0.00028161	723	11748	1004	17789	93897,14062,13610,14525,229714,12062,669149,233919,17125,14677,210198,233079,14362,14680,100312485,171256,13869,380921,16995,15465,20132,14676,381853,330581,627132,18132,110789,22355,623734,246313,433070,237362,637053,52614,666002,100042848,22414,81015,14701,546964,113864,22410,15560,382045,23796,12771,19220,18131,56089,269053,14829,64337,229323,17126,22310,13380,667060,11552,84111,17202,171203,6…
GO:0019438	aromatic compound biosynthetic process	biological_process	1.83e-05	0.0003242	984	11748	1385	17789	21374,70122,76022,272382,106248,17932,56314,432530,50496,73569,17126,28077,14460,245109,210719,22693,68703,226139,12013,212276,378435,52040,56771,210105,12799,20847,19724,18992,57230,54678,64424,170740,69020,268670,218030,27386,665913,13713,19411,18771,54131,21387,18642,114142,228876,67911,69920,26380,545938,18023,19664,19885,70081,235626,18505,67065,22690,17125,232966,102637366,414758,241944,191…
GO:0007167	enzyme linked receptor protein signaling pathway	biological_process	2.01e-05	0.00035381	32	11748	33	17789	1.38461e+161
GO:0034654	nucleobase-containing compound biosynthetic process	biological_process	2.2e-05	0.00038493	971	11748	1367	17789	59024,18770,225908,18019,107771,66491,193452,321000,21907,27274,12912,235048,234413,12591,21815,17127,435366,12399,78284,15378,22691,219150,22337,14282,15438,18991,240067,11513,74123,23856,211135,66172,69241,232791,12394,664987,69792,22700,433791,20183,26386,54169,100303732,77044,56458,12393,15376,332221,18736,70625,100503353,15405,24132,19076,12913,547097,236193,22751,239652,211347,14919,16476,1…
GO:0015698	inorganic anion transport	biological_process	2.96e-05	0.00050499	31	11748	32	17789	1.06073e+164
GO:0006836	neurotransmitter transport	biological_process	3.1e-05	0.00052706	25	11748	25	17789	2.05384e+135
GO:0007169	transmembrane receptor protein tyrosine kinase signaling pathway	biological_process	7.12e-05	0.0011745	23	11748	23	17789	1.36492e+116
GO:0016579	protein deubiquitination	biological_process	7.3e-05	0.0011921	53	11748	60	17789	22224,17847,28035,57775,74270,54651,13531,72344,74841,244144,236733,13532,59025,216835,327799,112694759,74996,170707,76800,83563,384701,22284,71472,30940,224836,74256,84092,76179,30941,53376,69727,24110,625530,99526,74112,227334,75083,237898,170822,77593,22258,319651,235441,216825,100756,235323,329908,78787,22225,72607,252870,22217,14479
GO:0070646	protein modification by small protein removal	biological_process	7.3e-05	0.0011921	53	11748	60	17789	224836,30940,22284,71472,83563,384701,170707,74996,76800,327799,112694759,216835,59025,13532,244144,236733,72344,74841,13531,54651,57775,74270,28035,17847,22224,252870,22217,14479,72607,22225,78787,100756,235323,329908,22258,319651,216825,235441,75083,170822,237898,227334,77593,74112,99526,625530,24110,69727,53376,30941,76179,84092,74256
GO:0006644	phospholipid metabolic process	biological_process	0.00023476	0.0035584	42	11748	47	17789	228812,52858,108083,114663,18717,99712,55980,27388,211429,227733,102238433,28042,241062,23827,117150,271844,67556,18783,329502,67292,18700,276846,219024,78390,18719,232889,16329,242291,27392,14755,19210,70325,320951,18711,72084,230801,72519,78928,18718,18720,71780,212862
GO:0006650	glycerophospholipid metabolic process	biological_process	0.00035985	0.0051528	29	11748	31	17789	1.1715e+154
GO:0046486	glycerolipid metabolic process	biological_process	0.00035985	0.0051528	29	11748	31	17789	2.42291e+154
GO:0016055	Wnt receptor signaling pathway	biological_process	0.00051235	0.0071836	28	11748	30	17789	2.24172e+141
GO:1901360	organic cyclic compound metabolic process	biological_process	0.00069005	0.0095557	1351	11748	1950	17789	67486,56738,381101,19075,240690,17135,210529,73473,76373,234734,109129,80509,212528,72480,233056,216119,19883,74670,245305,14085,72139,12916,18034,12014,72958,21834,232878,224598,226525,22062,20017,66464,13864,20586,56869,52712,11835,433586,107815,18503,26447,13983,229780,68153,245841,11908,13555,53970,22754,217708,20020,241732,381379,18968,15500,22746,72504,272347,237336,228839,69930,26927,21375…
GO:0046488	phosphatidylinositol metabolic process	biological_process	0.000728	0.0099583	27	11748	29	17789	1.87192e+144
GO:0009894	regulation of catabolic process	biological_process	0.00091491	0.012364	22	11748	23	17789	5.41537e+121
GO:0016311	dephosphorylation	biological_process	0.0011858	0.015835	84	11748	105	17789	231637,234129,19273,19262,19275,19260,19271,19246,67603,19276,12530,19245,19280,19277,56291,70686,245857,19252,13853,104831,19249,68082,75219,19250,66849,19274,19253,218294,19255,320139,19243,319520,70419,19267,252864,56405,56294,435391,19244,24018,13537,19256,18218,72519,63953,19258,66959,19283,72349,19281,19266,237860,545902,75590,19259,66461,100040244,19247,15170,382030,218232,19272,19264,7210…
GO:0046483	heterocycle metabolic process	biological_process	0.0012741	0.016946	1334	11748	1930	17789	115489950,11966,66869,14237,66965,327992,15427,242523,69757,211378,353282,20674,58202,60611,17220,636741,19415,15221,20021,231866,382985,109575,66526,17219,17193,56421,66231,72151,100043915,619332,21425,75033,11674,17134,70616,544963,22764,98685,233987,217038,228980,20226,22171,66637,20024,13170,217082,327963,22260,268417,18986,101056073,241624,100041433,353187,271639,27425,19090,244556,100316903…
GO:0031329	regulation of cellular catabolic process	biological_process	0.0013306	0.017281	21	11748	22	17789	2.20842e+116
GO:0040008	regulation of growth	biological_process	0.0013306	0.017281	21	11748	22	17789	1.60071e+106
GO:0071822	protein complex subunit organization	biological_process	0.0013352	0.017281	125	11748	162	17789	382056,19122,105440,233107,18196,399591,71393,18197,72844,67048,93677,230249,207474,225030,20892,12345,68089,22062,16494,67516,68572,330171,56543,16539,93689,16502,383348,233529,78478,212514,66733,216858,19240,100043712,21927,111368,17364,73178,74237,66747,16538,268345,74343,99571,71909,26886,56088,239217,212919,16508,99738,26434,226025,622320,225997,16493,22061,67498,259279,12343,66296,243043,11…
GO:0006508	proteolysis	biological_process	0.0013518	0.017428	425	11748	592	17789	58801,72584,68668,73626,11421,26440,28035,12333,17390,107522,69938,244144,20437,73677,226243,22230,279028,20439,245839,71078,330657,20438,12153,19172,66887,235130,208117,80893,22284,26944,66315,83563,208936,59287,94242,53376,56640,216725,50492,11491,27377,78309,114671,13479,66593,11488,329908,17391,93721,17287,170822,18554,58223,243084,75826,72607,56094,22225,244421,13039,12263,23830,22019,13363,…
GO:0006357	regulation of transcription from RNA polymerase II promoter	biological_process	0.0014602	0.018403	25	11748	27	17789	3.27988e+137
GO:0006725	cellular aromatic compound metabolic process	biological_process	0.001594	0.019934	1332	11748	1929	17789	66410,385312,18861,19725,103537,18584,69601,14463,100043387,240034,81703,29875,353208,18509,97827,101185,73610,56210,230103,68646,53605,20466,20675,432769,67205,117903916,16371,210554,320995,434377,71640,234724,407812,60321,17870,408022,232087,11946,328274,24014,21975,94112,74467,665001,72960,69228,243905,233060,72556,68147,17684,21400,210104,232853,74455,218772,22596,66763,69257,239546,18987,729…
GO:0006281	DNA repair	biological_process	0.001764	0.021823	57	11748	69	17789	102443351,227622,55993,19359,338371,15574,211651,19355,17350,19365,108138,66209,209334,17314,66467,12190,52864,243897,16882,70603,69596,234258,319583,12144,210554,27015,72774,17193,20892,14156,268395,22427,17686,382913,18861,14375,14088,19090,26447,14885,75570,217716,209357,26909,71885,208084,17687,19358,17535,227099,56210,80905,22596,102443350,17685,18294,23894
GO:0065003	macromolecular complex assembly	biological_process	0.0018228	0.022468	138	11748	181	17789	279499,17955,106931,14957,241794,16491,240444,15441,67771,226823,67242,238076,68566,56086,52808,16500,98741,16490,51885,58243,16506,50709,76709,242151,69259,20422,100503890,70461,241732,70382,382571,192196,243529,14083,74237,111368,16538,268345,99571,14958,26886,56088,239364,212919,75678,22061,12343,66296,259279,72480,246782,18196,16418,72844,50708,230249,225030,171506,67516,16494,17954,22062,565…
GO:0016042	lipid catabolic process	biological_process	0.0019316	0.022621	20	11748	21	17789	9.37321e+109
GO:0001558	regulation of cell growth	biological_process	0.0019316	0.022621	20	11748	21	17789	7.19241e+101
GO:0016049	cell growth	biological_process	0.0019316	0.022621	20	11748	21	17789	1.60067e+101
GO:0006152	purine nucleoside catabolic process	biological_process	0.0019764	0.022621	15	11748	15	17789	1.80152e+81
GO:0006184	GTP catabolic process	biological_process	0.0019764	0.022621	15	11748	15	17789	2.18397e+81
GO:0009143	nucleoside triphosphate catabolic process	biological_process	0.0019764	0.022621	15	11748	15	17789	2.40058e+81
GO:0009146	purine nucleoside triphosphate catabolic process	biological_process	0.0019764	0.022621	15	11748	15	17789	3.20485e+81
GO:0009154	purine ribonucleotide catabolic process	biological_process	0.0019764	0.022621	15	11748	15	17789	1.14713e+81
GO:0009164	nucleoside catabolic process	biological_process	0.0019764	0.022621	15	11748	15	17789	1.14713e+81
GO:0009203	ribonucleoside triphosphate catabolic process	biological_process	0.0019764	0.022621	15	11748	15	17789	2.18397e+81
GO:0009207	purine ribonucleoside triphosphate catabolic process	biological_process	0.0019764	0.022621	15	11748	15	17789	3.20485e+81
GO:0009261	ribonucleotide catabolic process	biological_process	0.0019764	0.022621	15	11748	15	17789	6.66912e+81
GO:0033124	regulation of GTP catabolic process	biological_process	0.0019764	0.022621	15	11748	15	17789	3.20485e+81
GO:0042454	ribonucleoside catabolic process	biological_process	0.0019764	0.022621	15	11748	15	17789	1.80152e+81
GO:0043087	regulation of GTPase activity	biological_process	0.0019764	0.022621	15	11748	15	17789	1.80152e+81
GO:0046130	purine ribonucleoside catabolic process	biological_process	0.0019764	0.022621	15	11748	15	17789	2.40058e+81
GO:1901069	guanosine-containing compound catabolic process	biological_process	0.0019764	0.022621	15	11748	15	17789	5.44963e+81
GO:1901658	glycosyl compound catabolic process	biological_process	0.0019764	0.022621	15	11748	15	17789	2.40057e+81
GO:0006820	anion transport	biological_process	0.0020865	0.0238	62	11748	76	17789	20515,13521,20514,12725,30962,20512,20531,240215,26373,20510,12724,216441,26372,19743,269356,171429,74087,55951,12728,80979,11988,56365,11987,50934,232156,26570,224022,20511,231583,208890,12723,330836,70784,245128,12733,224661,20505,142681,12727,242607,70456,268512,20536,328059,55963,59033,20516,218756,320718,11732,23985,94229,56315,20533,58176,106073,20539,140475,13487,241919,54403,53896
GO:0044723	single-organism carbohydrate metabolic process	biological_process	0.0021547	0.024408	107	11748	138	17789	241230,18641,140481,217664,433182,20442,26877,74551,100198,13806,329777,68292,103963,69064,353204,72297,225742,240119,231727,14347,11871,97884,54613,94181,18663,14345,20448,11870,17160,16430,230163,20449,53625,93961,26879,13200,11546,20454,171167,66435,20447,18419,18746,170768,11545,26878,217734,17159,20014,26938,109978,110208,328417,232984,13807,20450,11674,235587,102637973,14430,97440,14380,204…
GO:0006470	protein dephosphorylation	biological_process	0.0021616	0.024408	81	11748	102	17789	70419,320139,19243,319520,13853,104831,19249,68082,75219,19253,66849,218294,19250,19274,19255,19277,56291,70686,245857,19252,12530,19245,19280,19271,67603,19246,19276,231637,234129,19273,19262,19275,19260,105352,67446,545622,19263,24000,235584,12531,80915,240672,229776,240892,27389,19248,19268,19279,76571,68440,19211,218232,19272,72102,19264,237860,545902,75590,19259,66461,15170,100040244,19247,3…
GO:0044255	cellular lipid metabolic process	biological_process	0.0021616	0.024408	81	11748	102	17789	68631,72084,330217,338521,208715,71780,66234,18720,381334,212862,93732,78928,16329,232889,319660,18719,13481,53897,14755,545276,80911,70325,19210,271844,107476,329502,18783,108657,117150,23827,78390,230101,15360,619597,18700,18717,114663,12642,14466,228812,52858,97212,235293,14420,55980,227733,380959,72061,100705,230801,72519,100041596,18718,74121,15107,242291,230379,66190,18711,320951,27392,7136…
GO:0006139	nucleobase-containing compound metabolic process	biological_process	0.0022698	0.025545	1311	11748	1901	17789	105244402,22718,15260,228790,232784,15213,66161,20892,14283,666584,70881,68915,17425,72807,100504263,234344,20371,380855,83993,13368,18572,17936,67370,384763,74469,545471,218832,18018,11821,75773,66500,15375,18032,22775,22776,230162,70047,18025,54561,22696,68705,74400,234362,66808,100043403,408067,18114,18028,13559,71063,665211,278174,23942,71701,18393,55994,108138,75735,216177,387586,22767,10263…
GO:0048856	anatomical structure development	biological_process	0.0028728	0.032009	90	11748	115	17789	66496,17927,66195,57275,238328,50781,22417,57754,211556,227634,16775,24064,16988,631101,67154,54485,18424,70433,22420,17877,69697,69514,16772,22421,244329,18129,234130,18483,66175,73730,22409,114716,12951,22415,22412,16449,17928,226841,56811,22408,29862,16450,20890,69520,67828,13388,18128,677884,114715,11698,114301,22411,22422,73722,12591,12590,380918,211286,22418,22416,17878,12592,16774,98404,67…
GO:0048013	ephrin receptor signaling pathway	biological_process	0.0029939	0.032393	14	11748	14	17789	1.38371e+71
GO:0032502	developmental process	biological_process	0.0031884	0.034388	92	11748	118	17789	22419,18131,93735,216795,13380,66203,19373,20437,18423,93840,22410,24063,71421,20439,20438,16447,22414,24066,246747,229658,22413,22423,17878,380918,211286,12590,22418,22416,16774,12592,67127,18081,98404,67886,18132,68720,20890,677884,114715,67828,69520,13388,18128,114301,11698,73722,12591,22411,22422,22415,22412,16449,226841,17928,29862,16450,56811,22408,18483,68527,234130,66175,73730,22409,12951…
GO:0042493	response to drug	biological_process	0.004535	0.047246	13	11748	13	17789	9.40457e+68
GO:0016020	membrane	cellular_component	2.85e-57	3.2e-54	2223	11748	2828	17789	330671,12773,16519,171229,68653,243979,13138,67511,74446,110835,12311,114143,93790,227394,11479,15002,13595,93961,110168,29862,105940408,100312473,171273,18858,22329,235300,19122,629079,387355,11536,20539,114716,15466,58182,17171,58226,13867,18169,233571,231252,546903,74105,211712,64082,26570,21366,50918,171242,56457,13388,100534287,17305,20536,432838,214523,14706,75604,170756,56325,14805,20361,2…
GO:0016021	integral to membrane	cellular_component	3.82e-27	7.14e-25	1293	11748	1669	17789	58193,269966,113848,12482,383258,11540,627537,110880,66190,110893,22269,72961,73658,239283,17775,68957,436440,211499,66631,628946,233221,58520,319387,12921,73010,68318,20508,381884,12780,627743,171248,319217,68255,22232,20014,209776,12057,18141,100312477,11932,239606,17083,20501,545391,54199,241263,72023,625131,12765,224916,19216,12425,15247,100312474,13478,381489,99887,70747,228139,170706,545909…
GO:0031224	intrinsic to membrane	cellular_component	4.55e-27	8.06e-25	1297	11748	1675	17789	226304,60361,545975,14309,56199,667180,229801,546980,70423,230379,83770,109254,217664,66141,171201,109225,73102,243616,328759,72674,70355,319239,93734,234267,666085,20333,231470,75552,16190,171247,380683,171199,192897,81017,268878,627805,20525,217517,17202,381339,667060,11552,269356,269053,14829,229323,74338,56089,76409,64009,16521,54403,380712,497097,16792,382045,20528,59031,546964,18146,637053,…
GO:0044425	membrane part	cellular_component	4.35e-20	3.41e-18	1415	11748	1883	17789	233187,381560,57252,382030,66508,113855,76252,20190,12300,74136,231430,56017,19214,20529,229782,56552,14969,244701,14602,18007,64095,56368,64378,12801,12922,54160,214111,19165,54485,170731,100009609,70839,140494,22314,214112,276846,233080,208634,100042653,208820,171262,238377,18442,16492,12686,171265,64058,71279,53330,665227,100042810,76219,20541,64297,232962,236690,68137,622222,56857,23964,17125…
GO:0031012	extracellular matrix	cellular_component	1.17e-08	3.07e-07	67	11748	71	17789	17394,17388,233332,12831,12832,17395,17390,223838,207596,229595,12827,17387,12822,235130,77794,26561,12842,208936,30800,83995,216725,101401,373864,115490424,66548,234911,50530,237360,118453,23948,17391,108153,58223,71355,224697,12829,30806,240913,17150,240047,108154,12825,17384,214766,17381,17385,12826,17389,23794,17393,12830,12828,12814,239337,12819,94216,11504,12843,12824,240322,17392,53867,173…
GO:0071944	cell periphery	cellular_component	1.55e-07	3.51e-06	102	11748	117	17789	75914,12295,50779,18438,107371,110876,24046,20273,11945,98741,12296,271036,11513,11931,14700,16500,94045,24053,207565,18439,381091,12298,20762,14702,14708,18436,20765,50782,64337,14699,14960,20755,20269,11933,20763,14961,14706,20761,15000,74190,20760,14707,74463,100503710,277978,14701,20759,20274,327957,24012,16447,15001,14704,66066,76718,100042514,228139,14998,13138,12297,211446,20756,210044,545…
GO:0005886	plasma membrane	cellular_component	7.53e-07	1.57e-05	93	11748	107	17789	12297,13138,19739,15002,106757,20272,18440,545391,67821,20756,210044,231602,100043318,20764,11932,24051,74325,244431,20392,631584,14709,14969,24052,67300,70784,20758,14616,224129,16939,21687,20391,20265,20271,94212,100303744,20264,320225,15567,14999,110880,50779,18438,12295,11945,20273,24046,110876,94045,16500,11931,14700,11513,12296,271036,98741,20762,12298,381091,18439,207565,24053,20765,18436,…
GO:0044459	plasma membrane part	cellular_component	9.07e-06	0.00016594	74	11748	85	17789	12298,381091,18439,24053,207565,11931,14700,94045,16500,12296,271036,98741,24046,110876,11945,20273,12295,18438,50779,228139,14998,76718,66066,15001,14704,24012,327957,100503710,20274,14701,14707,20269,11933,14706,15000,14961,50782,14960,14699,64337,18436,14708,14702,24051,11932,100043318,231602,244431,20392,631584,74325,15002,106757,19739,67821,545391,20272,18440,13138,12297,15567,14999,320225,2…
GO:0044431	Golgi apparatus part	cellular_component	2.89e-05	0.00049662	36	11748	38	17789	###############################################################################################################################################################################################################################################################
GO:0012505	endomembrane system	cellular_component	8.09e-05	0.0013157	119	11748	148	17789	66844,74241,66612,380664,320452,20254,99683,12317,73316,12652,619597,27054,338337,12033,99412,12847,208624,76687,67398,78634,60409,228859,54161,97484,78482,70699,71805,218811,245828,13135,380959,72084,20334,18451,330217,70349,67843,224640,28146,14731,227102,78928,100910,69608,381334,76895,108802,269941,12121,20394,56041,76219,545276,70325,66712,381903,67767,53897,66811,13481,213696,330671,56088,2…
GO:0034702	ion channel complex	cellular_component	0.00010789	0.0017044	22	11748	22	17789	2.02691e+116
GO:0034703	cation channel complex	cellular_component	0.00010789	0.0017044	22	11748	22	17789	1.22971e+116
GO:0005856	cytoskeleton	cellular_component	0.00013355	0.002071	214	11748	281	17789	100042514,75296,17916,110308,17910,13823,360013,20759,17919,100126226,380684,16447,227058,217328,332131,17920,240960,670533,406219,74376,70831,21955,76709,68768,75706,110310,109052,71602,51885,268482,76952,110350,66196,71453,54152,67771,667772,109620,237934,246177,70843,53617,67665,233335,16666,17761,75586,16672,16905,16671,100191037,19132,69473,100303744,16939,64818,13821,56735,17886,237806,1341…
GO:0030117	membrane coat	cellular_component	0.00025226	0.003756	30	11748	32	17789	2.03341e+154
GO:0048475	coated membrane	cellular_component	0.00025226	0.003756	30	11748	32	17789	1.17742e+154
GO:0005794	Golgi apparatus	cellular_component	0.00027862	0.0041121	45	11748	51	17789	12847,99412,99683,619597,338337,27054,238123,226744,22232,330671,74241,218811,245828,54160,78752,97484,60409,330406,54161,74325,69608,100910,67300,381334,74102,77371,229782,17294,233824,67843,20334,24060,330217,70349,100041596,13047,53897,545276,78923,234356,12121,56041,217664,76895,269941
GO:0000139	Golgi membrane	cellular_component	0.00051235	0.0071836	28	11748	30	17789	2.40602e+146
GO:0031984	organelle subcompartment	cellular_component	0.00060372	0.0084295	49	11748	57	17789	13047,72084,24060,67843,78928,227102,14731,229782,74102,100910,269941,22269,217664,76219,56041,381903,70325,27392,234356,78923,107513,13481,66811,66624,67767,74241,330671,66612,213696,66844,208820,22232,20014,226744,109815,276846,67398,76687,67887,330406,228859,69019,13200,78752,380959,76976,13135,320438,74330
GO:0005887	integral to plasma membrane	cellular_component	0.000728	0.0099583	27	11748	29	17789	2.31602e+139
GO:0031226	intrinsic to plasma membrane	cellular_component	0.000728	0.0099583	27	11748	29	17789	1.84382e+139
GO:0005783	endoplasmic reticulum	cellular_component	0.0010958	0.014749	53	11748	63	17789	50527,28146,18451,72084,78928,72772,227102,14731,102339,76219,108802,12330,22269,13481,66811,107513,27061,67767,66624,381903,103963,70325,27392,16976,67397,208820,72661,320452,56088,66612,213696,66844,276846,12033,20014,73316,12317,109815,228859,69019,67398,76687,12745,208624,18452,67887,380959,13135,76976,320438,74330,13200,67475
GO:0005654	nucleoplasm	cellular_component	0.0013985	0.017843	75	11748	93	17789	13716,192191,66467,103806,66464,19014,13557,72568,70088,242705,26896,28015,104394,17130,56790,76199,75316,234959,327987,67219,21781,80509,269344,74469,20933,17128,108961,70408,17131,228980,73247,55994,56771,24074,12914,328572,13559,112694759,50496,72504,211586,68705,270118,381379,83602,17126,28077,69792,68219,66213,619332,329650,52679,17127,209357,17129,70422,27878,14885,217708,13555,94112,67224,…
GO:0044451	nucleoplasm part	cellular_component	0.0013985	0.017843	75	11748	93	17789	71885,93697,192657,59024,433586,235459,67381,13555,217708,75660,94112,67224,66172,17125,54624,67065,329650,17127,52679,17129,209357,14885,27878,70422,66213,68219,619332,50496,211586,68705,270118,72504,28077,17126,381379,83602,69792,13559,112694759,56771,55994,24074,12914,328572,73247,70408,17131,228980,20933,74469,108961,17128,21781,269344,80509,76199,56790,75316,234959,67219,327987,26896,104394,…
GO:0031981	nuclear lumen	cellular_component	0.0023909	0.026818	91	11748	116	17789	192191,13716,66467,56739,103806,66464,242705,19014,15574,70088,72568,13557,26896,19357,17130,28015,104394,75316,56790,76199,327987,67219,210554,234959,21781,80509,269344,74469,20933,17128,108961,101185,74075,17131,70408,228980,19367,20587,73247,50912,64934,12914,24074,56771,55994,52864,328572,112694759,56452,13559,72504,211586,68705,270118,50496,70020,69792,381379,83602,17126,28077,68219,66213,61…
GO:0016023	cytoplasmic membrane-bounded vesicle	cellular_component	0.0029001	0.032049	23	11748	25	17789	7.73711e+116
GO:0031988	membrane-bounded vesicle	cellular_component	0.0029001	0.032049	23	11748	25	17789	1.28478e+116
GO:0001533	cornified envelope	cellular_component	0.0029939	0.032393	14	11748	14	17789	2.07632e+77
GO:0044430	cytoskeletal part	cellular_component	0.0044587	0.046886	184	11748	249	17789	668940,17883,100415785,16670,231646,115486481,21952,56735,13417,17886,237806,338367,17913,432600,270163,16688,17880,223917,16694,75586,16672,16666,233335,64818,100191037,16905,16671,19132,69473,100009614,408058,234582,239673,70810,16705,670464,74237,16691,670880,21957,432516,670482,259279,17925,12343,16669,320864,406220,13424,240960,17920,332131,227058,217328,70831,21955,670533,406219,74376,17916…
GO:0005488	binding	molecular_function	4.01e-63	1.35e-59	7296	11748	10257	17789	13179,13864,12326,271981,27061,226525,26365,20648,217737,69060,14170,242700,232878,26992,170771,260299,66510,20480,74434,13417,74326,245305,100038538,233056,74157,235623,72039,107094,234734,70432,72057,105980075,73473,14560,110279,76630,14735,14415,639781,320940,67944,66622,622127,68184,67045,224860,76338,214189,20591,16334,107569,75777,20909,83997,11863,170936,235130,20401,245643,76899,18968,276…
GO:0043167	ion binding	molecular_function	2.59e-57	3.2e-54	2808	11748	3653	17789	18796,71607,224530,241950,93885,211347,13086,16551,23894,17472,76072,18392,67755,67725,192163,380669,216238,21822,76025,93711,13175,319944,434729,83984,207215,214158,207352,215303,94213,17886,237877,64340,226421,234311,19762,72154,17152,69398,225861,73316,193452,223435,270160,66629,12950,14468,27267,12335,244071,30937,18753,66350,100705,13075,218811,66196,110350,67938,22337,22691,15378,66895,7035…
GO:0016740	transferase activity	molecular_function	1.72e-39	7.24e-37	1157	11748	1427	17789	54125,28114,110355,13171,20280,791260,58864,69131,19229,108037,24014,78266,14360,22239,21846,75607,16798,16818,271697,74455,18639,12908,12914,331374,223646,53315,20393,102580,20444,70425,12169,381113,12909,20443,109880,27374,70383,18214,620736,108083,14159,214230,66138,216019,110197,12567,78752,57295,353371,233020,228094,64580,17096,192656,69083,117903916,69740,56077,68646,230103,628475,213326,40…
GO:0005515	protein binding	molecular_function	1.57e-38	5.29e-36	3589	11748	4892	17789	66085,16176,50788,11622,98733,14784,102278,110312,12835,100764,240095,15018,67561,71436,231600,13602,381280,13052,12387,329252,83558,110380,57750,216445,20684,74383,52685,100061,69583,12854,227738,108155,208777,28000,71735,22061,235472,333088,71978,243574,52635,71819,26437,13589,226517,244152,240756,68867,12215,57263,17910,21350,22423,625638,74053,16574,52432,320040,15216,100503386,67772,98496,67…
GO:0043168	anion binding	molecular_function	1.13e-33	2.53e-31	1255	11748	1585	17789	19179,104175,18759,238564,55988,11746,74718,27263,59125,67131,207565,13631,217716,19416,215951,71602,71742,106572,11745,109242,75050,13204,19704,667772,71769,75770,72831,26396,71807,217258,19878,107508,19338,11852,17916,19216,22241,101320,17216,14854,72935,22114,192188,50883,26408,18640,75678,332110,11652,12747,276950,240880,226565,11651,12465,72065,70120,234730,19691,24015,432516,208583,170768,1…
GO:0016773	phosphotransferase activity, alcohol group as acceptor	molecular_function	7.62e-27	1.28e-24	576	11748	687	17789	12978,232533,227333,12704,212032,14182,19886,227541,67184,263803,11352,18481,18753,225326,26417,58231,26416,74568,20868,107951,27219,223435,11350,12322,16706,16179,15277,27373,13836,18770,70415,26409,11790,236574,320129,226751,71461,17152,83984,192292,17691,215303,23954,14917,70584,110651,16451,12795,105787,84095,13175,20459,14919,211347,237459,13835,545929,100504207,18754,77976,12568,22165,26448…
GO:0097367	carbohydrate derivative binding	molecular_function	1.11e-25	1.62e-23	1108	11748	1418	17789	66887,17169,13003,74137,16552,73914,67470,26406,234374,108960,217328,26415,108058,27409,16337,22027,381314,59021,214901,26905,98267,54170,338372,17347,330721,16568,73470,18762,217866,19346,12750,19353,214952,11306,229898,320795,230809,12469,12167,18099,13682,74159,100043665,20874,338367,20817,19182,237806,100019,207704,70784,13548,26874,225724,71743,68146,22367,210009,13424,20927,21355,320806,239…
GO:0046872	metal ion binding	molecular_function	9.01e-25	1.17e-22	1600	11748	2116	17789	170737,19123,72881,14118,93723,212569,449521,545288,212281,101604,74729,233168,73173,52020,17344,22184,71861,72180,54216,233073,230815,14725,328329,11687,26379,77446,22222,13108,503610,20128,30806,69955,546071,21824,109593,215445,54667,319601,434726,20657,74464,235574,108167848,626316,56438,83557,22654,77117,30841,67005,382137,22242,226143,320873,666311,381463,353237,20841,101401,100041379,13982,…
GO:0043169	cation binding	molecular_function	1.07e-24	1.33e-22	1606	11748	2125	17789	219228,56404,544922,227619,22755,71643,106794,66704,104349,213436,11749,108154,17748,17064,195531,22129,170749,225998,18073,20190,244713,13076,52589,94090,327958,16769,232855,329002,20203,93836,21813,22756,17751,54484,65969,14465,12550,16875,26423,100043133,215061,93722,65945,76737,14231,70796,72925,21929,271127,21825,18484,216825,74168,12315,210162,93716,94093,234358,93702,74519,242939,14068,408…
GO:0017076	purine nucleotide binding	molecular_function	7.23e-24	8.36e-22	1085	11748	1395	17789	218699,14773,18715,68939,214897,17855,76074,237911,216166,231932,544791,72388,244895,12649,75292,16564,11479,66067,225997,100043566,241656,29857,52163,242505,319991,59126,18669,224105,226778,140557,21877,18682,16558,74044,21454,67459,234733,12648,77579,16559,18711,13728,69237,72482,13867,56532,21812,16589,106763,68087,116904,16560,56637,232441,52033,16562,67155,224805,100043645,225594,211770,7308…
GO:0001071	nucleic acid binding transcription factor activity	molecular_function	7.45e-24	8.36e-22	325	11748	367	17789	14241,15227,23958,260298,22026,13557,11910,18515,18109,17130,436240,76365,59057,13865,100041581,68837,26424,268417,18986,353187,19696,22061,93681,12396,110784,228980,19015,16476,13170,22260,217082,53314,56458,12393,80902,15376,332221,116810,18736,12913,18999,12394,14461,54139,20183,26386,20728,22697,12398,60611,12912,17127,15221,12399,22337,22691,226641,78284,15378,14282,18991,18044,109575,74123,…
GO:0003700	sequence-specific DNA binding transcription factor activity	molecular_function	7.45e-24	8.36e-22	325	11748	367	17789	14464,13875,245572,65020,13813,16918,54446,26927,21375,15370,170936,217127,18029,14236,235682,21388,73274,170734,72504,211586,26427,15500,14390,11908,16477,13555,22757,13983,73181,19698,20852,21385,22758,75507,11835,245525,52712,233490,18227,18171,22433,13864,208677,22062,242705,21386,116871,21380,56632,15900,14239,385674,74481,15499,545913,232878,18030,21834,77110,56501,13712,12355,18514,16364,1…
GO:0032553	ribonucleotide binding	molecular_function	1.92e-23	2.09e-21	1077	11748	1386	17789	18126,26399,74450,75985,228775,81003,18747,74591,76251,545926,16572,50772,217151,20878,16554,77407,15115,16571,19134,103988,665113,17921,106504,67657,268281,20585,18712,286942,26398,67487,26414,110960,216877,244418,227154,26420,55984,242891,270192,71619,269209,13168,29807,16580,12748,19092,53860,19744,11480,217837,216344,26900,27103,57837,19091,81000,225028,606496,12534,22138,622474,13494,228543,…
GO:0001882	nucleoside binding	molecular_function	6.55e-23	6.89e-21	1060	11748	1365	17789	328778,20480,228785,108079,12325,13417,12537,237300,18951,58222,23996,634650,12326,271981,53886,27061,19345,14852,383592,20112,19766,72039,57740,234734,74194,233328,17279,72508,18968,229900,12236,317758,53416,67045,71981,76338,210145,381406,30877,545814,18752,20586,14772,19331,235442,217262,217371,209012,67071,18755,18557,18555,11854,20869,68015,23939,12464,106794,381835,102436,19428,17909,22321,…
GO:0001883	purine nucleoside binding	molecular_function	7.82e-23	7.52e-21	1059	11748	1364	17789	382137,71091,23920,13429,628664,69976,235344,13006,114896,224092,101568,67333,231045,16576,16573,237890,12540,85305,19339,17686,26419,11303,109333,433653,13872,27405,56200,73991,24013,93843,69716,381759,330149,60530,18754,67059,623474,105148,15944,74006,26921,110935,76367,54204,65967,56542,14287,12572,56504,105278,69955,546071,71089,93687,50523,50932,56350,328329,26412,264064,11947,20479,279029,2…
GO:0032549	ribonucleoside binding	molecular_function	7.82e-23	7.52e-21	1059	11748	1364	17789	69159,192119,140810,69581,228889,381836,69719,19384,224624,17164,19341,213084,21813,69288,15258,19428,17909,22321,76688,668225,17912,19328,329421,18195,55993,15519,56087,381979,23939,12464,106794,381835,102436,26395,13649,67121,68142,228421,223881,70359,76877,19332,70223,268379,53859,69562,240327,23797,109905,53608,64143,20133,216439,19344,226422,347722,269610,20620,268930,16553,56480,74691,18479…
GO:0032550	purine ribonucleoside binding	molecular_function	7.82e-23	7.52e-21	1059	11748	1364	17789	544791,231932,72388,14773,218699,237911,216166,76074,17855,68939,214897,18715,225997,66067,52163,29857,241656,100043566,244895,11479,16564,75292,12649,224105,18682,226778,140557,21877,319991,242505,18669,59126,16559,18711,13728,21454,74044,16558,77579,12648,234733,67459,116904,68087,232441,56637,16560,69237,13867,16589,106763,56532,21812,227624,74222,224805,100043645,67155,52033,16562,73086,21177…
GO:0035639	purine ribonucleoside triphosphate binding	molecular_function	9.33e-23	8.72e-21	1058	11748	1363	17789	68146,22367,20927,13424,225724,71743,15467,23955,77591,109151,21355,320806,12167,13682,18099,320795,12469,230809,70784,207704,26874,13548,237806,20817,19182,20874,338367,100043665,100019,16568,330721,17347,338372,73470,26905,54170,98267,11306,229898,19346,217866,18762,214952,19353,12750,73914,234374,26406,67470,17169,66887,74137,16552,381314,22027,16337,27409,214901,59021,26415,108960,217328,1080…
GO:0032555	purine ribonucleotide binding	molecular_function	1.12e-22	1.02e-20	1067	11748	1376	17789	17532,263803,74351,227541,74376,68556,11305,243374,19324,212032,19326,16569,245240,71206,232533,11843,19340,15277,16179,27373,71941,20558,236574,22671,11790,56382,246177,30959,12468,66821,665155,58231,26417,19330,26416,22375,18481,71984,56298,20174,23954,52563,70584,71382,240697,17217,72433,14670,226751,320129,56044,103967,67040,83408,107932,27406,11307,13205,70560,17250,17687,14635,69684,271457,…
GO:0005216	ion channel activity	molecular_function	2.97e-22	2.43e-20	228	11748	248	17789	20274,14654,17178,16535,382571,170706,228139,14395,14800,242151,170738,233649,328699,12723,14396,14657,56188,12727,20269,140492,57249,22063,16490,110902,98741,16438,12296,16500,57780,14812,333329,22066,84036,207565,18439,16506,56843,22068,56365,16524,110862,12725,16491,226922,241794,18301,16532,16439,18438,26946,11419,241118,238076,64177,242443,20273,240444,24046,20271,20265,22067,237213,11449,14…
GO:0015267	channel activity	molecular_function	2.97e-22	2.43e-20	228	11748	248	17789	14654,17178,16535,382571,170706,228139,14800,14395,20274,14657,56188,12727,20269,140492,242151,170738,233649,328699,12723,14396,14812,333329,84036,22066,207565,16506,18439,56843,56365,22068,16524,110862,57249,22063,16490,98741,110902,12296,16438,16500,57780,241118,238076,11419,64177,242443,20273,24046,240444,16491,12725,241794,16532,226922,18301,16439,18438,26946,16511,110880,16502,12790,20264,15…
GO:0022803	passive transmembrane transporter activity	molecular_function	2.97e-22	2.43e-20	228	11748	248	17789	16516,246133,16515,11418,211468,14399,108043,225030,14394,102443351,74166,20265,20271,237213,22067,14806,11449,16494,12790,20264,56543,193034,74096,15168,16502,110880,16511,11447,14811,16538,268345,16534,216643,12788,14405,277328,14807,26372,246788,14803,14799,14813,12286,11448,15561,171209,60613,252972,15166,11435,14404,14396,12723,242151,233649,328699,170738,12727,140492,20269,14657,56188,20274…
GO:0022838	substrate-specific channel activity	molecular_function	2.97e-22	2.43e-20	228	11748	248	17789	14802,330953,14407,12290,16539,110637,66733,57814,15165,194352,20190,11438,110886,192775,14810,16440,16509,53623,14403,20277,16508,233979,11440,72392,52076,226025,99738,18440,16536,225997,16493,20272,12288,14409,16513,67498,22368,231602,59095,504186,16517,14658,16518,12292,16533,11870,12287,110835,58802,12291,17364,140493,12297,108017,30952,380728,16510,16519,20191,20278,12724,16520,14814,28240,1…
GO:0004672	protein kinase activity	molecular_function	4.64e-20	3.55e-18	499	11748	606	17789	26420,328329,67459,22390,244418,227154,14158,16453,50523,50932,21682,279029,13728,68943,26412,18160,264064,55984,59126,19092,12166,105278,230661,22612,12748,269209,93687,226778,546071,27103,18682,51789,330177,245650,11480,14918,224105,606496,11479,12534,74178,22138,75292,12649,225028,244895,56542,19091,15259,52163,100043566,56504,29857,56489,382253,320119,241656,225997,12572,622474,18198,13866,32…
GO:0016301	kinase activity	molecular_function	8.69e-20	6.5e-18	573	11748	707	17789	235604,12675,381835,70762,22637,23939,13846,381979,68646,56077,230103,213326,628475,329421,11920,192656,21813,15258,17096,228094,213084,233020,17164,231876,381836,140810,12567,110197,108083,214230,14159,620736,18214,109880,18479,381113,70425,12169,56480,268930,20620,12716,20393,13845,331374,18639,271697,53608,23797,16818,16798,75607,83813,21846,69562,53859,14360,24014,19229,69131,67121,13649,5886…
GO:0060589	nucleoside-triphosphatase regulator activity	molecular_function	9.62e-19	6.75e-17	160	11748	170	17789	50753,15463,192786,107338,110279,545156,233046,52666,228850,24001,219140,17714,76089,19730,277360,73341,78618,19158,51791,102075,20662,224014,27387,76123,26431,69710,17713,16800,217737,101497,19157,14163,17207,20403,241308,223435,236915,20469,57257,16801,263406,110351,442801,72318,213783,78255,69632,107746,16443,213649,216963,217944,71746,98366,29815,268739,11857,72754,109904,18545,544963,71729,1…
GO:0036094	small molecule binding	molecular_function	1.44e-18	9.35e-17	1502	11748	2018	17789	19340,11843,232533,71206,245240,16569,212032,19326,67039,23881,19654,11305,19324,243374,68556,74376,227541,15569,263803,74351,114332,17532,20174,56298,76936,71984,18481,69241,22375,18242,26416,19330,28036,58231,26417,665155,66821,15388,107701,12468,30959,246177,56382,22671,236574,11790,20558,67010,71941,27373,16179,15277,107932,83408,103967,67040,18127,56044,226751,320129,53313,14670,72433,17217,…
GO:0030695	GTPase regulator activity	molecular_function	1.46e-18	9.35e-17	154	11748	163	17789	19730,76089,277360,50753,15463,110279,192786,107338,52666,24001,228850,545156,233046,219140,16800,69710,101497,19157,17207,20403,14163,78618,73341,51791,19158,102075,27387,20662,224014,26431,76123,16443,213783,69632,78255,107746,216963,213649,217944,241308,223435,20469,236915,16801,57257,72318,263406,442801,110351,544963,71729,109904,18545,211673,19417,380711,213990,99371,13196,71746,98366,29815,…
GO:0016772	transferase activity, transferring phosphorus-containing groups	molecular_function	2.04e-18	1.27e-16	682	11748	862	17789	11920,329421,213326,628475,56077,68646,230103,381979,408022,13846,23939,22637,70762,381835,12675,235604,14159,214230,108083,216019,110197,12567,140810,381836,231876,17164,233020,213084,228094,17096,21813,15258,192656,331374,13845,20393,71279,12716,20620,268930,70425,12169,56480,381113,18479,109880,12909,18214,620736,54125,266632,110355,26395,13649,67763,58864,67121,69131,19229,24014,18969,78266,1…
GO:0008144	drug binding	molecular_function	2.45e-17	1.5e-15	850	11748	1101	17789	108077,13144,14719,208144,234847,19877,97541,170755,13869,15201,12168,227099,59041,240255,75560,219189,69926,226414,72047,20555,12545,23972,69181,14417,11482,13666,11655,22115,17165,12566,30933,26405,11666,22589,24061,13400,380698,12144,21452,20815,66634,19094,227612,24086,93761,231580,58800,110957,102626,19687,227674,18671,68278,117229,622486,674895,78943,67247,11481,50850,15275,12323,18241,2641…
GO:0019899	enzyme binding	molecular_function	4.85e-17	2.91e-15	149	11748	159	17789	230972,233726,74018,71409,22325,76582,76484,54324,622434,71704,110596,56508,19418,66011,223254,320292,215632,226432,70727,77669,212999,75717,213522,245666,71972,381112,320727,213498,223864,109934,232237,210762,328967,13605,269608,243621,102098,227377,22324,207212,19732,240168,19731,234094,54004,232807,75751,230098,13998,380698,19159,234353,226970,74055,98710,216805,26382,19395,53972,73728,19419,2…
GO:0051020	GTPase binding	molecular_function	1.19e-16	7.04e-15	132	11748	139	17789	109294,21844,75547,74002,235633,56349,268480,19877,20663,30938,53972,73728,19419,232227,54126,76441,74563,103573,75751,230098,13998,380698,19159,234353,226970,74055,216805,98710,26382,19395,19731,240168,234094,54004,13605,243621,269608,102098,227377,22324,207212,19732,212999,213522,245666,71972,320727,381112,213498,223864,109934,232237,328967,223254,320292,215632,226432,70727,77669,233726,230972,…
GO:0000166	nucleotide binding	molecular_function	1.53e-16	8.72e-15	1437	11748	1940	17789	18640,50883,26408,22114,72935,207181,14854,101320,17216,22241,19216,17916,11852,19338,107508,19878,30946,217258,74772,71807,26396,72831,75770,71769,170759,667772,18115,19704,13204,75050,245610,109242,106572,71742,71602,215951,19416,226646,217716,207565,13631,67131,27263,59125,18759,238564,104175,19179,77604,11938,18563,170472,15568,66922,26908,320790,212679,78334,11991,93759,52513,26357,432467,19…
GO:1901265	nucleoside phosphate binding	molecular_function	1.53e-16	8.72e-15	1437	11748	1940	17789	23939,66704,106794,12464,381835,59013,102436,22321,17909,76688,19428,329421,18195,19328,668225,17912,56087,229279,381979,14555,55993,56381,15519,74778,218865,17164,224624,19341,241490,237073,21813,69288,15258,93728,213084,69159,192119,228889,381836,140810,53621,69581,19384,69719,23912,237886,18479,74691,100048658,71389,18125,19344,216439,50770,11941,347722,226422,269610,20620,14675,16553,56480,26…
GO:0005215	transporter activity	molecular_function	2.23e-16	1.25e-14	554	11748	695	17789	27411,16508,52076,74087,14664,330064,14409,22368,380701,59095,66500,16517,16518,27060,12292,11870,12291,17364,67473,108017,14412,20510,12724,14814,17339,226781,74610,11732,229706,22782,16539,28248,239273,12858,94281,57814,15165,213053,74102,192775,330836,16440,20277,328059,20500,230612,28080,12728,105243,229363,11987,20495,232156,14809,11444,13521,11973,16523,226999,27416,12789,26373,240215,69640…
GO:0005524	ATP binding	molecular_function	2.77e-16	1.53e-14	803	11748	1041	17789	668880,381937,13209,78903,12466,71567,18817,140780,20877,29869,217265,19106,213452,140859,19366,19718,223775,244141,16578,18004,52513,17215,107045,26357,67979,17880,72149,320790,212679,78334,18563,170472,16563,75678,226539,12747,11652,332110,240880,276950,71990,11651,12465,18647,24015,432516,19691,208583,234730,70120,170768,27404,12780,17685,100043638,19184,217258,26413,104721,19878,107508,26972,…
GO:0030554	adenyl nucleotide binding	molecular_function	3.25e-16	1.76e-14	812	11748	1054	17789	71990,11651,12465,18647,240880,276950,12747,11652,332110,16563,75678,226539,17685,100043638,19184,27404,12780,170768,432516,24015,208583,19691,234730,70120,19366,19718,16578,244141,223775,18004,217265,19106,140859,213452,140780,20877,29869,668880,13209,381937,12466,78903,17713,71567,18817,18563,170472,72149,320790,78334,212679,67979,17880,17215,52513,107045,26357,69847,27413,71602,18607,215951,21…
GO:0032559	adenyl ribonucleotide binding	molecular_function	4.52e-16	2.41e-14	810	11748	1052	17789	13869,15201,227099,12168,240255,59041,13144,108077,208144,234847,19877,170755,97541,20555,12545,69181,23972,11482,13666,75560,226414,69926,219189,72047,22589,11666,24061,13400,380698,12144,17165,22115,26405,12566,30933,231580,110957,102626,58800,20815,66634,19094,24086,93761,227612,68278,674895,622486,117229,78943,50850,11481,227674,19687,18671,30931,13206,11964,216965,11477,12361,70218,15275,123…
GO:0005509	calcium ion binding	molecular_function	1.34e-15	6.93e-14	346	11748	416	17789	69543,70405,13518,72040,12314,228413,12373,80334,93700,102866,545370,93703,232370,12939,93876,69301,13510,56506,268977,18530,93877,12565,18795,93880,18129,93879,26364,211924,12309,18602,71768,93717,93890,215654,21924,26611,12745,75599,245578,108687,546336,12561,21826,12333,64075,67268,18526,214593,13733,11752,108802,23991,329628,93881,208650,64706,94217,269437,214189,93713,225256,13507,77627,1174…
GO:0005085	guanyl-nucleotide exchange factor activity	molecular_function	1.91e-14	8.25e-13	108	11748	113	17789	545156,233046,52666,207212,24001,219140,19732,13605,50753,22324,192786,107338,227377,243621,269608,102098,110279,277360,232237,328967,213522,245666,109934,223864,213498,76089,19730,71972,381112,20662,70727,224014,27387,77669,73341,320292,223254,102075,19158,215632,19418,56508,71704,110596,19157,101497,14163,20403,17207,74018,230972,54324,76484,622434,22325,16800,16801,57257,268480,263406,442801,2…
GO:0022836	gated channel activity	molecular_function	3.14e-14	1.32e-12	126	11748	135	17789	14406,57014,16500,14408,94045,57249,12728,98741,110902,12296,14402,108015,56365,12298,16524,14812,207565,84036,18439,18438,12295,14809,110834,20192,11444,12725,231252,16523,16532,20273,110876,24046,26373,100502876,14400,14401,242443,16531,16514,11441,211480,20274,16492,170706,228139,14395,14800,14654,227632,16521,12723,18436,14805,14396,12733,328699,240776,110304,12727,20269,11443,140492,56379,72…
GO:0022839	ion gated channel activity	molecular_function	3.14e-14	1.32e-12	126	11748	135	17789	20273,24046,26373,110876,100502876,14400,16531,242443,14401,18438,20192,11444,14809,110834,12295,16523,231252,12725,16532,108015,14402,12298,16524,56365,14812,18439,84036,207565,94045,14408,57014,16500,14406,12728,57249,12296,98741,110902,12727,110304,240776,140492,11443,20269,72413,14657,56379,16522,14804,16521,14396,14805,18436,12723,328699,12733,14395,228139,14800,170706,14654,227632,16514,114…
GO:0016787	hydrolase activity	molecular_function	6.05e-14	2.51e-12	1186	11748	1600	17789	229524,17228,328092,71884,66967,216456,27410,435845,73218,66637,73902,381122,19060,193838,16912,241624,381038,269152,17883,231646,13526,72349,170725,17913,93685,252864,53419,23959,227399,13211,216848,545260,223978,66569,26945,17385,66461,50817,103850,18576,80287,218294,56453,230101,76560,11497,74306,18797,76773,77593,19166,64705,100163,23948,54611,231915,19271,226409,60594,230908,18574,69597,1106…
GO:0022857	transmembrane transporter activity	molecular_function	2.63e-13	1.04e-11	464	11748	585	17789	16514,212670,11936,28240,22785,67972,211480,338370,23985,223473,11944,69806,239556,208890,30805,231583,14805,18436,21354,329954,245128,56325,142681,240776,11443,11951,12289,56379,16522,14804,20536,28080,98396,12728,105243,277973,229363,80979,21366,11987,26570,232156,11444,20192,13521,14809,231252,16523,11973,20514,27416,226999,26373,240215,110876,12789,11984,100502876,320707,58226,74610,226781,33…
GO:0043565	sequence-specific DNA binding	molecular_function	2.53e-12	9.91e-11	181	11748	208	17789	23942,15220,69257,15229,68703,19013,100009600,14460,14462,21750,19668,20181,23871,272382,381319,18124,14536,19373,14235,19885,14234,19664,54601,56484,217166,13982,17300,71241,15228,218772,21833,15377,83925,26380,12611,13713,19411,381463,114142,26379,14238,13661,50796,30942,229599,11909,225998,231991,15218,20371,15223,13714,17425,223922,104156,20182,110794,71375,22259,242620,64290,14283,18667,1730…
GO:0003824	catalytic activity	molecular_function	2.65e-12	1.02e-10	3137	11748	4474	17789	268860,13123,27406,104086,71665,241062,69684,20459,56401,77015,54613,13070,84095,223706,27421,109959,69367,75847,235584,72962,72043,227638,93692,17231,50790,70584,22273,66313,23954,71887,52563,15487,13166,70202,271842,19244,16365,98711,74114,109900,100041375,68444,53374,382620,269642,13371,13081,71989,319518,11790,236574,73379,110115,22153,433256,109778,75686,16706,30941,19274,11754,208266,18242,…
GO:0016757	transferase activity, transferring glycosyl groups	molecular_function	1.27e-11	4.71e-10	165	11748	189	17789	217119,99929,381694,227327,54218,76898,13135,380959,94215,613123,20446,20451,74241,73379,320011,74493,223337,20441,17309,20440,671535,72077,231396,235587,394432,232984,109978,80908,381903,14755,552899,243085,654821,14936,20445,17308,56546,97440,11872,215494,50935,215493,78781,100910,67287,16430,16848,14345,54613,21951,71001,11546,320302,280645,72962,110417,100727,14537,320438,20449,381101,101351,…
GO:0008289	lipid binding	molecular_function	3.18e-11	1.16e-09	122	11748	135	17789	59045,18705,225861,433492,11808,71982,67135,16558,56356,170625,142682,18830,329910,216871,76742,74156,71939,69226,11749,71893,20616,69150,18667,70160,245282,58240,69787,108956,20845,209131,64652,17969,215114,14218,272636,11816,330914,320119,102607,666348,381399,50768,217463,72183,56018,382083,231834,243362,223672,52635,218699,244962,11744,328561,71607,14815,66696,233489,66113,54198,266781,278679,…
GO:0046873	metal ion transmembrane transporter activity	molecular_function	3.26e-11	1.18e-09	118	11748	130	17789	11944,170706,11941,14411,69806,227632,233280,16514,68427,67972,20274,211480,16492,223473,240776,20269,74338,76713,20530,140492,20276,72413,56379,56774,16522,214922,232333,20511,16521,72002,22599,14977,74552,227059,110862,12298,16524,21366,53945,84036,16500,102857,98741,16438,12296,20273,110876,24046,277468,100502876,241118,11419,381290,16531,320707,16439,12295,20192,20514,16523,16532,20264,20529,…
GO:0008270	zinc ion binding	molecular_function	4.04e-11	1.45e-09	585	11748	765	17789	22025,18034,24105,240913,381845,66825,21834,74287,66510,243548,140481,67966,77683,116871,56353,110147,13864,328365,18171,11499,17384,69035,74315,240690,67944,240069,66622,70605,11504,70546,225341,233056,100039681,65970,229542,233895,67399,17246,19883,170676,225876,76681,19303,229615,16917,16872,235130,55992,14464,59033,21401,16886,11835,74322,381678,224826,216725,13983,22225,68310,234329,12785,33…
GO:0017016	Ras GTPase binding	molecular_function	5.55e-11	1.95e-09	91	11748	97	17789	328967,56419,70435,232237,277360,109934,213498,71972,381112,320727,213522,212999,219140,545156,207212,52666,16211,24001,22324,227377,269608,102098,110279,13605,208846,14163,20403,17207,19418,66011,71704,110596,101497,76582,54324,622434,22325,65246,16800,71409,74018,230972,233726,77669,224014,20662,226432,102075,73341,57778,223254,103573,76441,213649,110750,54126,213783,22379,69632,16443,53972,263…
GO:0031267	small GTPase binding	molecular_function	5.55e-11	1.95e-09	91	11748	97	17789	71972,320727,381112,109934,213498,212999,213522,56419,328967,232237,277360,70435,269608,110279,102098,22324,227377,208846,13605,219140,207212,52666,16211,24001,545156,16800,76582,54324,622434,22325,65246,74018,233726,230972,71409,20403,17207,14163,71704,101497,110596,66011,19418,102075,223254,73341,57778,77669,226432,224014,20662,16443,213783,69632,22379,53972,103573,76441,54126,110750,213649,235…
GO:0022891	substrate-specific transmembrane transporter activity	molecular_function	6.18e-11	2.14e-09	403	11748	512	17789	245128,329954,18436,14805,208890,231583,20536,56379,14804,16522,11951,12289,11443,240776,142681,223473,23985,67972,338370,211480,22785,28240,212670,16514,11936,239556,69806,11944,20514,231252,11973,16523,14809,13521,20192,11444,58226,320707,100502876,11984,110876,12789,240215,26373,226999,80979,229363,277973,105243,12728,98396,28080,232156,26570,11987,21366,16440,330836,192775,74102,24060,328059,…
GO:0015276	ligand-gated ion channel activity	molecular_function	1.41e-10	4.8e-09	84	11748	89	17789	57249,110902,14408,94045,57014,14406,14812,18439,207565,108015,14402,16524,16523,231252,18438,20192,11444,14809,110834,14400,242443,14401,211480,16514,11441,14654,14395,228139,14800,328699,16521,14396,14805,18436,14657,56379,14804,16522,110304,11443,14409,14813,18440,11448,16513,15561,11440,14799,14803,110835,14404,11435,11870,231602,16518,504186,14658,16517,11447,14811,16519,216643,16520,14807,1…
GO:0022834	ligand-gated channel activity	molecular_function	1.41e-10	4.8e-09	84	11748	89	17789	328699,18436,14396,14805,16521,14657,56379,14804,16522,11443,110304,211480,11441,16514,14654,228139,14395,14800,16523,231252,14809,110834,11444,20192,18438,14401,242443,14400,110902,57249,14406,57014,94045,14408,207565,18439,14812,16524,14402,108015,16515,14810,16516,110886,108043,14399,14403,53623,237213,14806,11449,14407,14802,14394,20190,11438,110637,216643,16519,14811,11447,14814,14807,16520,…
GO:0022892	substrate-specific transporter activity	molecular_function	1.76e-10	5.92e-09	423	11748	542	17789	70701,14813,16646,14803,234076,19743,14404,15166,230810,210148,60613,171209,67547,16534,216643,14811,11447,16648,67942,26372,381884,20538,14807,22784,333182,22232,236727,240332,16494,74166,55963,20516,12862,320718,53896,16511,72027,110880,16502,74096,193034,56543,106073,17777,11974,108043,14399,268512,211468,98741,102857,110902,11988,11950,16438,57249,16490,16500,13340,57780,207565,84036,12861,16…
GO:0017048	Rho GTPase binding	molecular_function	2.1e-10	6.99e-09	78	11748	82	17789	53972,16443,213783,69632,22379,54126,213649,76441,75547,109294,21844,223435,235633,236915,56349,16801,57257,19877,263406,20663,442801,30938,19878,109904,13367,19417,234094,54004,13998,230098,380698,72754,226970,26382,268739,213522,381112,71972,109934,213498,232237,277360,70435,56419,328967,208846,13605,269608,102098,110279,22324,227377,207212,52666,24001,545156,219140,74018,230972,71409,16800,622…
GO:0015075	ion transmembrane transporter activity	molecular_function	2.59e-10	8.55e-09	395	11748	504	17789	68427,20533,382571,22272,14395,16535,233280,14411,20463,12723,75483,14057,72002,22599,170738,77031,14977,233649,242151,236794,20269,140492,67843,20505,12727,56188,56774,214922,171429,12296,22063,22068,110862,56843,22066,53945,18439,26946,16439,11975,16491,240444,97086,242443,238076,241118,102443351,14394,237213,22067,14806,103098,11449,20271,20265,15168,13487,12790,20264,246133,16516,239436,16515…
GO:0046914	transition metal ion binding	molecular_function	3.63e-10	1.16e-08	728	11748	974	17789	546726,14460,17387,319713,69802,68703,16948,22030,30800,15203,16873,211147,26561,17450,234258,69608,19386,17932,72399,14199,214290,54630,16874,56469,636931,19885,53318,232966,11500,67917,226105,243983,100039060,234736,319236,18973,19411,59044,23793,58860,234847,234911,26380,69920,12925,24131,15185,23792,66980,83457,22644,19822,23802,22259,12856,195018,332175,14067,110751,19401,328695,18744,330119…
GO:0005543	phospholipid binding	molecular_function	8.82e-10	2.77e-08	69	11748	72	17789	76742,170625,142682,71982,16558,225861,18705,64652,17969,209131,69787,70160,58240,20616,69150,71893,69226,11749,217463,102607,320119,330914,215114,14218,66696,71607,244962,218699,11744,382083,231834,72183,17972,18704,229593,74478,12306,67804,16952,266781,54198,233489,71790,76561,240752,11752,69024,233071,227449,69178,55988,18806,11746,74718,66895,66616,235406,101113,26359,11750,11745,74479,66629,…
GO:0008509	anion transmembrane transporter activity	molecular_function	1.07e-09	3.34e-08	374	11748	478	17789	66335,110637,20529,66733,20190,11438,14802,76252,14403,242607,53623,104245,14810,16509,110886,224022,229782,504186,12868,231602,16533,12287,11416,58802,22598,226025,99738,233979,13162,72392,16513,328133,84682,16493,20278,243616,30791,68775,140493,12297,20515,140494,16510,214112,11941,227632,54403,20544,241919,11441,218756,58176,58800,12857,16492,94229,56315,74338,20276,110304,54652,232333,72413,2…
GO:0019001	guanyl nucleotide binding	molecular_function	1.78e-09	5.5e-08	276	11748	344	17789	229900,317757,59021,74734,11852,317758,19376,19338,76338,210145,11844,30877,13629,214952,19353,19331,19346,235442,100972,229898,217371,14674,106572,54170,18534,14682,26905,19416,11854,328778,66922,26908,11858,14683,18951,70784,58222,207704,20624,74551,56212,634650,19106,19345,320806,80718,17857,245670,19354,632971,14852,72065,80837,233328,74194,69834,68146,23912,14579,20224,17274,18000,55932,6779…
GO:0005083	small GTPase regulator activity	molecular_function	3.39e-09	1.01e-07	84	11748	91	17789	213522,245666,381112,71972,109934,213498,232237,277360,328967,50753,13605,269608,243621,110279,102098,22324,227377,107338,52666,207212,24001,545156,219140,74018,230972,16800,622434,54324,22325,71704,110596,19157,101497,19418,20403,17207,14163,223254,73341,192662,215632,19158,102075,224014,20662,77669,73728,53972,16443,213783,69632,54126,232227,213649,75547,21844,109294,223435,235633,74002,236915,…
GO:0004674	protein serine/threonine kinase activity	molecular_function	3.95e-09	1.15e-07	70	11748	74	17789	58231,13631,20868,27219,73086,69847,232341,18755,18753,11482,18761,75607,106504,217866,279561,170755,71481,21812,12168,116904,12322,23797,103236,56274,70425,58800,18754,67045,20393,22241,72508,108058,58988,20111,109333,13400,19216,240505,11479,11651,12323,11477,225997,19090,11652,16150,214897,110279,20112,11481,21813,320795,328329,226751,12167,108737,18751,29869,269275,11920,245000,225638,20874,1…
GO:0015103	inorganic anion transmembrane transporter activity	molecular_function	4.18e-09	1.18e-07	361	11748	463	17789	14394,102443351,20271,20265,22067,237213,14806,11449,103098,12790,20264,13487,15168,16516,246133,16515,11418,225030,246788,14799,27425,66142,12286,11448,15561,252972,11435,106957,16538,268345,12788,14405,277328,110895,68427,16535,14395,382571,14411,233280,72002,75483,12723,20463,236794,242151,233649,77031,14977,170738,22599,12727,20505,67843,140492,20269,214922,56774,56188,171429,22063,12296,5684…
GO:0015114	phosphate ion transmembrane transporter activity	molecular_function	4.18e-09	1.18e-07	361	11748	463	17789	110304,20276,74338,72413,232333,54652,16521,240595,20511,224661,12733,11941,241919,20544,227632,11441,16492,12857,58800,63873,20531,14400,381290,16504,16531,225865,216441,14401,22065,110834,12295,30962,108015,14402,12298,21871,16485,16512,94045,14408,14406,57014,53623,242607,14403,224022,110886,16509,104245,14810,229782,20529,110637,66335,20190,11438,66733,76252,14802,243616,20278,12297,20515,140…
GO:0015318	inorganic solute uptake transmembrane transporter activity	molecular_function	4.18e-09	1.18e-07	361	11748	463	17789	30962,110834,12295,22065,14400,381290,16504,225865,16531,216441,14401,63873,20531,14408,94045,57014,14406,21871,16485,16512,108015,14402,12298,12733,224661,240595,16521,20511,72413,232333,54652,110304,20276,74338,16492,12857,58800,11441,241919,20544,227632,11941,214112,16510,140494,20515,12297,140493,30791,68775,243616,20278,84682,16493,16513,328133,72392,233979,13162,99738,226025,22598,58802,122…
GO:0015563	uptake transmembrane transporter activity	molecular_function	4.18e-09	1.18e-07	361	11748	463	17789	80979,277973,12728,105243,28080,26570,11987,21366,20514,231252,11973,16523,14809,20192,13521,11444,58226,320707,100502876,11984,12789,110876,26373,226999,223473,23985,211480,67972,338370,28240,11936,212670,16514,239556,69806,11944,245128,329954,18436,14805,231583,208890,16522,56379,14804,11443,12289,11951,240776,142681,67498,22368,18440,16536,14664,225997,20272,14409,12288,52076,74087,16508,11440…
GO:0005088	Ras guanyl-nucleotide exchange factor activity	molecular_function	1.17e-08	3.07e-07	67	11748	71	17789	21844,109294,75547,236915,223435,235633,56349,16801,57257,20663,442801,30938,263406,53972,16443,69632,213783,54126,213649,230098,13998,380698,226970,72754,26382,268739,109904,19417,234094,13605,269608,102098,110279,227377,22324,24001,207212,52666,545156,219140,213522,381112,71972,213498,109934,232237,277360,328967,223254,73341,102075,20662,224014,77669,230972,74018,16800,22325,622434,54324,71704,…
GO:0005089	Rho guanyl-nucleotide exchange factor activity	molecular_function	1.17e-08	3.07e-07	67	11748	71	17789	230972,74018,22325,622434,54324,16800,19418,71704,101497,110596,14163,17207,20403,73341,223254,102075,224014,20662,77669,213522,213498,109934,71972,381112,277360,232237,328967,13605,227377,22324,110279,269608,102098,545156,24001,52666,207212,219140,109904,19417,234094,230098,13998,380698,26382,268739,226970,72754,53972,69632,213783,16443,213649,54126,21844,109294,75547,56349,236915,223435,235633,…
GO:0005230	extracellular ligand-gated ion channel activity	molecular_function	1.17e-08	3.07e-07	67	11748	71	17789	14395,14800,228139,14654,11441,110304,11443,14804,14657,18436,14805,14396,328699,14402,108015,14812,207565,18439,57014,14406,94045,14408,57249,110902,14400,14401,242443,18438,110834,14809,11444,231252,110637,11438,14394,14802,14407,14806,237213,11449,53623,14403,108043,14399,110886,14810,231602,504186,14658,14404,11435,11870,110835,11440,14799,14803,18440,14813,14409,15561,11448,14405,14807,14814…
GO:0042578	phosphoric ester hydrolase activity	molecular_function	1.25e-08	3.24e-07	157	11748	186	17789	12531,11647,235584,24000,545622,67446,105352,19211,18796,68440,76571,19279,20975,19268,18585,110385,18575,18795,23984,19043,103850,15170,18576,66461,235534,545902,72102,17330,66569,239318,18802,19272,13537,101744,227399,19244,435391,233537,19267,114875,252864,19283,72349,18578,19258,225600,63953,18218,319520,19243,18797,241489,18573,19253,75219,19250,19274,218294,104831,13853,237928,103199,19280,…
GO:0032561	guanyl ribonucleotide binding	molecular_function	2.37e-08	5.91e-07	260	11748	327	17789	208666,381812,68724,59040,56526,231931,56795,76308,71966,52856,170758,52065,66725,19328,19329,76688,140743,215449,19428,20130,19342,11566,212508,66397,75668,69288,236573,19341,432555,67286,224624,16145,19384,54396,24067,69581,28030,69159,19334,18952,13628,67295,276952,55932,11565,67790,17274,20224,18000,23912,14579,75141,240328,19335,347722,226422,19700,103080,216439,19344,64143,231279,15461,1099…
GO:0030234	enzyme regulator activity	molecular_function	3.25e-08	8.05e-07	253	11748	318	17789	21788,11813,217944,12569,213649,73720,216963,70419,213783,13011,107746,78255,69632,16443,58200,21858,263406,110351,442801,72318,57257,16801,223435,236915,20469,241308,99371,20733,13196,17837,232345,18821,11983,213990,19417,380711,12268,211673,75901,109904,192201,11287,18545,12570,544963,71729,53814,16644,58214,66259,268739,11857,72754,98366,29815,78239,18769,71746,13012,277343,13001,277360,30052,…
GO:0005261	cation channel activity	molecular_function	3.35e-08	8.22e-07	73	11748	79	17789	16519,16534,12297,140493,16520,20278,20191,16513,20272,16536,18440,52076,72392,58802,16533,16518,16517,231602,171209,16515,16509,246133,16440,16516,20277,11418,20271,20265,74166,20190,57814,110880,20264,16532,16523,20192,12295,18438,16439,16531,11419,241118,100502876,24046,110876,20273,16438,12296,98741,94045,16500,18439,207565,84036,110862,16524,12298,18436,16521,72413,16522,56379,140492,20276,2…
GO:0005525	GTP binding	molecular_function	3.46e-08	8.26e-07	258	11748	325	17789	22671,56382,14468,270160,18176,665155,67398,19330,56298,74012,107526,403178,14469,67844,246710,17532,19324,243374,69721,20362,68203,19326,213990,80981,226982,245240,237107,19349,19340,104303,75423,14853,11840,11843,19325,100702,17472,100101806,13430,70317,56327,212539,67166,271457,19769,109168,21822,11845,68365,104215,68708,319642,16653,320982,104886,11853,56297,15953,14670,219144,56437,11861,724…
GO:0003677	DNA binding	molecular_function	1.41e-07	3.2e-06	792	11748	1088	17789	381319,17268,229603,107889,550619,16658,15423,19714,18516,23871,15429,225631,68024,20185,18996,15208,18987,69257,11634,21958,15220,239099,17190,269610,14462,15377,12611,319184,218772,228731,22596,18969,387609,23857,237029,319182,13796,227644,74318,20588,320799,72960,93760,17702,21400,54125,228598,56484,18998,27217,21975,13390,68142,544971,21908,14375,18993,56449,107751,13592,16371,18092,320995,24…
GO:0016798	hydrolase activity, acting on glycosyl bonds	molecular_function	2.36e-07	5.22e-06	63	11748	68	17789	16591,17156,104183,230815,109685,140481,238023,329828,14387,110006,226413,12654,77042,17158,229687,72774,73744,227619,14376,12494,66848,231583,234258,217364,12659,17160,232714,14466,83379,192193,108687,14420,268395,15586,110173,74409,382913,18294,71665,12655,66967,15932,381101,11605,71884,74245,58866,15442,12182,15587,74468,17159,69983,17155,230101,15211,17939,76051,74185,235435,26430,18419,628870
GO:0008083	growth factor activity	molecular_function	2.53e-07	5.57e-06	75	11748	83	17789	14205,12981,22341,12163,17700,14573,21808,12977,12160,16159,14175,54189,14168,14166,21803,80857,12156,12162,80903,14180,14174,16323,22340,14178,14167,14179,16322,67112,14562,12165,14164,14177,93898,320202,54635,64654,12164,13590,22339,21809,19242,14559,18591,12154,12159,14170,56636,16196,18119,16325,12161,14563,18188,14561,18654,242316,17242,16324,12155,14171,11876,14176,70314,14169,14165,16191,1…
GO:0035091	phosphatidylinositol binding	molecular_function	3.31e-07	7.14e-06	53	11748	56	17789	66696,74479,71607,66629,102141,18805,268396,244962,218699,170755,231834,382083,72183,217463,55988,18806,102607,320119,74718,330914,66616,66895,235406,101113,14218,64652,17969,209131,76561,240752,69024,58240,70160,233071,227449,69150,71893,69226,69178,17972,76742,18704,229593,170625,74478,142682,67804,266781,71982,16558,225861,54198,18705
GO:0022804	active transmembrane transporter activity	molecular_function	4.94e-07	1.05e-05	84	11748	95	17789	244562,11306,331004,11973,20514,97086,19299,27416,226999,381290,320707,28080,102857,105243,277973,27413,21366,20511,11666,77031,22599,21354,56325,236794,76713,67843,74338,74915,232333,12638,224814,56774,76408,208169,67972,11941,11944,19300,20544,20928,14411,20515,67473,74446,20512,17250,14412,236727,22232,240332,20538,381884,12780,18671,110895,243616,21355,20510,73834,20927,234076,13162,14664,380…
GO:0015291	secondary active transmembrane transporter activity	molecular_function	1.41e-06	2.77e-05	49	11748	52	17789	20538,381884,243616,110895,20510,97086,236727,22232,226999,240332,20512,331004,14412,20514,67473,20515,74446,22598,102680,21366,380701,102857,105243,14664,277973,234076,13162,232333,24060,56774,76713,242607,67843,74338,77031,229782,22599,236794,104245,74102,20511,20544,14411,15567,103098,208169,229706,55963,20516
GO:0005244	voltage-gated ion channel activity	molecular_function	1.5e-06	2.9e-05	44	11748	46	17789	16524,16518,12298,56365,16517,16500,20272,12728,12296,16513,98741,20273,24046,26373,110876,12724,16520,26372,12297,12295,12725,16523,16519,20264,170706,110880,57814,16514,20274,211480,20271,20265,16492,12727,20269,16522,56379,16521,16516,246133,16509,12723,16515,12733
GO:0022832	voltage-gated channel activity	molecular_function	1.5e-06	2.9e-05	44	11748	46	17789	211480,20271,20274,20265,16492,16514,110880,57814,20264,170706,16515,12733,16521,16516,246133,16509,12723,56379,16522,12727,20269,20272,12728,12296,98741,16513,16500,16524,16518,12298,56365,16517,12725,16523,16519,12297,12295,16520,12724,26372,20273,26373,24046,110876
GO:0015081	sodium ion transmembrane transporter activity	molecular_function	1.5e-06	2.9e-05	44	11748	46	17789	110880,14411,15567,20264,103098,20265,20274,20271,229706,55963,232333,56774,242607,76713,20276,20277,20269,74338,11418,22599,104245,20511,22598,102680,21366,171209,102857,20272,14664,13162,20538,381884,20510,243616,241118,11419,20278,24046,110876,240332,20273,20512,14412,20514
GO:0016746	transferase activity, transferring acyl groups	molecular_function	3.08e-06	5.85e-05	104	11748	123	17789	78920,93673,75541,54169,66116,100504710,11298,208715,55979,102247,17962,11655,100134861,270084,73809,69215,70325,107435,72117,100043497,110446,328572,217127,245532,12908,12914,28169,15360,56441,54342,12647,70999,98956,74763,52123,231086,93674,668257,192654,231510,215456,73242,107146,21818,20280,13171,78070,97243,225010,110460,70902,52538,71832,240549,18108,67800,226856,12894,113868,13828,70646,18…
GO:0004553	hydrolase activity, hydrolyzing O-glycosyl compounds	molecular_function	4.93e-06	9.31e-05	54	11748	59	17789	232714,14466,83379,217364,17160,12659,14420,15586,110173,74409,192193,108687,11605,74245,58866,71884,15587,71665,12655,15932,66967,76051,74185,26430,18419,235435,628870,74468,17159,69983,17155,230101,15211,17939,230815,109685,140481,238023,329828,14387,16591,17156,104183,226413,12654,77042,110006,17158,229687,231583,66848,73744,227619,14376
GO:0016758	transferase activity, transferring hexosyl groups	molecular_function	6.39e-06	0.00011944	98	11748	116	17789	215493,100910,394430,272411,67555,240755,73068,17308,56546,14936,97440,381903,80908,112417,654821,243085,552899,14755,394432,231396,102637973,232984,269941,72077,71103,117592,68273,22239,320011,14348,223337,17309,74241,233781,13135,72094,380959,613123,94215,99011,76898,227327,394435,54218,208624,217119,108105,231727,97884,94284,14347,72297,394433,14343,230801,14594,218476,67569,110078,71773,22238…
GO:0008047	enzyme activator activity	molecular_function	6.62e-06	0.00012301	49	11748	53	17789	212285,110854,241694,216963,217692,12569,70314,226407,319618,11813,228998,15463,20469,77038,110279,109791,228850,74206,22084,106952,99326,29875,216991,56784,19387,110351,544963,12570,211914,75901,380711,268390,69710,54189,216439,213990,217737,105886299,347722,140500,13196,230837,78618,66251,231801,98366,404710,244668,26431
GO:0005096	GTPase activator activity	molecular_function	9.61e-06	0.00017395	39	11748	41	17789	###############################################################################################################################################################################################################################################################
GO:0016817	hydrolase activity, acting on acid anhydrides	molecular_function	2.27e-05	0.00039594	279	11748	368	17789	16578,217265,634650,27061,668880,229589,100019,338367,13417,237806,320790,14683,17880,26874,26357,58799,71990,71715,20927,13424,16563,12780,234582,73834,17857,27404,21355,109151,383592,432516,24015,16552,17916,66887,67470,74772,217258,20437,240960,74915,16565,16570,17216,217328,17920,229900,53857,27409,67951,224079,14682,71602,27413,244421,269400,22142,73470,16568,72831,67414,20586,667772,229898,…
GO:0016462	pyrophosphatase activity	molecular_function	2.79e-05	0.00048327	263	11748	346	17789	58799,71715,13424,20927,16563,234582,12780,21355,17857,27404,73834,383592,432516,24015,16578,217265,634650,27061,668880,229589,100019,338367,13417,237806,17880,14683,26874,26357,27413,71602,224079,14682,244421,269400,22142,73470,16568,67414,72831,667772,217262,75050,229898,109242,244562,19704,13204,11306,14674,21974,16552,17916,66887,67470,74772,217258,20437,74915,16570,240960,16565,229900,17920,…
GO:0017111	nucleoside-triphosphatase activity	molecular_function	2.83e-05	0.00048902	258	11748	339	17789	69192,16564,14678,320631,71723,16582,668303,237911,76074,208943,74006,13207,544791,208084,70737,239273,22151,216877,16558,77579,16559,103733,74610,68178,14679,16580,14687,319991,18669,217207,242851,209737,56427,26570,16562,381917,73710,16554,16571,28080,320707,17921,27416,13429,67487,11973,16581,72162,286942,27407,73804,16573,16560,16576,11944,67972,56505,17885,227613,93838,224742,11303,381072,21…
GO:0008237	metallopeptidase activity	molecular_function	4.85e-05	0.00082004	127	11748	158	17789	108153,230857,17287,11492,11500,23948,72061,17391,93721,118453,232680,224697,58223,11497,27377,66548,115490424,12874,114896,50492,83995,11491,101401,216725,237360,58860,23793,11488,108657,234911,234847,244071,71078,229595,17387,12153,207596,74574,223838,279028,11498,18675,30800,11502,69597,239833,280668,208936,26561,19155,77794,235130,67269,56264,233332,16790,215095,17394,384806,244486,13524,1738…
GO:0008233	peptidase activity	molecular_function	5.75e-05	0.00096769	435	11748	593	17789	26440,28035,16790,74158,68668,73626,11421,20437,73677,226243,12333,17390,107522,69938,244144,71078,330657,12153,18624,279028,245839,80893,22284,26944,66315,83563,208936,19172,237958,66887,235130,27377,76867,94242,53376,50492,56640,216725,11491,13479,11488,114671,17287,170822,329908,17391,93721,56094,22225,244421,230726,58223,18554,75826,243084,72607,13363,22019,12751,22224,76703,23830,13039,12263…
GO:0022843	voltage-gated cation channel activity	molecular_function	5.99e-05	0.0010028	34	11748	36	17789	1.65172e+173
GO:0016791	phosphatase activity	molecular_function	6.56e-05	0.0010921	106	11748	130	17789	76768,50773,19243,320139,319520,237928,104831,13853,19249,19255,75219,68082,19250,218294,19253,19274,232941,66566,19277,56291,73373,70686,19252,245857,19245,68106,12530,19280,107569,14120,67603,19246,19271,72391,66610,19276,234129,19273,231637,19275,19262,19042,19260,11432,105352,67446,24000,19263,545622,67881,235584,14121,80915,12531,11647,240672,229776,240892,19043,27389,11650,19268,219024,1924…
GO:0008081	phosphoric diester hydrolase activity	molecular_function	6.67e-05	0.0011051	46	11748	51	17789	224860,18803,269437,18576,18583,227120,71584,74182,18802,12799,239318,66569,72469,114875,18574,18577,18798,233537,56209,207728,433022,54611,74055,238871,225600,18578,269615,403178,242202,18584,77626,241489,18797,78600,18585,218461,18588,18573,18796,23984,233552,29863,18795,110385,18575,18799
GO:0004222	metalloendopeptidase activity	molecular_function	8.97e-05	0.0014505	96	11748	117	17789	110751,170721,216119,17386,27390,330119,271127,13522,17380,11504,21892,239337,17392,240322,11495,214766,75805,17385,11487,17381,17384,24087,11489,23792,11499,68876,17393,17389,23794,238405,30806,11496,240047,13526,108154,70478,230709,11501,240913,11492,17287,230857,108153,118453,17391,11500,23948,224697,11497,58223,115490424,66548,27377,83995,50492,101401,11491,216725,114896,11488,23793,58860,237…
GO:0016818	hydrolase activity, acting on acid anhydrides, in phosphorus-containing anhydrides	molecular_function	9.09e-05	0.001463	270	11748	359	17789	14674,21974,11306,13204,19704,244562,229898,109242,217262,75050,667772,72831,67414,16568,73470,22142,269400,244421,71602,14682,224079,27413,67951,27409,53857,217328,17216,229900,17920,16570,74915,240960,16565,20437,217258,74772,67470,66887,17916,16552,432516,24015,383592,17857,73834,27404,21355,12780,234582,16563,20927,13424,71715,71990,58799,26357,26874,14683,17880,13417,237806,338367,100019,229…
GO:0016887	ATPase activity	molecular_function	9.35e-05	0.0014958	90	11748	109	17789	74915,13871,20437,11303,224742,224814,12638,381072,13411,11305,74365,320209,11666,21354,56325,12144,27405,74591,27409,11944,19300,11941,66887,20928,76408,67470,74142,67972,217258,74772,268379,27416,22596,19299,320707,381290,244562,27407,217262,21974,11973,11306,244421,27413,224079,219189,69926,72960,269400,14885,14375,110350,28080,22427,18669,100019,13417,237806,192663,26874,56199,224088,26357,74…
GO:0008194	UDP-glycosyltransferase activity	molecular_function	9.38e-05	0.0014958	28	11748	29	17789	7.27272e+152
GO:0070011	peptidase activity, acting on L-amino acid peptides	molecular_function	0.00011575	0.0018201	422	11748	577	17789	15235,215772,210622,22223,71472,244954,23794,104416,100102,216835,214766,19152,100040208,208166,214531,19167,58803,17384,11499,14944,170707,71287,223870,240047,74841,240913,50909,104184,22224,76703,12751,22019,13039,12263,23830,215351,58799,71829,14941,13032,13038,17174,170721,109821,26442,319651,18549,216119,17392,329093,15234,64139,235631,11495,18050,232371,19143,317652,328780,11504,80886,20893…
GO:0015293	symporter activity	molecular_function	0.00012332	0.0019211	32	11748	34	17789	1.44112e+170
GO:0015294	solute:cation symporter activity	molecular_function	0.00012332	0.0019211	32	11748	34	17789	1.55671e+170
GO:0015370	solute:sodium symporter activity	molecular_function	0.00013753	0.0021229	27	11748	28	17789	1.04245e+144
GO:0005326	neurotransmitter transporter activity	molecular_function	0.00016346	0.0024902	21	11748	21	17789	2.40333e+113
GO:0005328	neurotransmitter:sodium symporter activity	molecular_function	0.00016346	0.0024902	21	11748	21	17789	3.81884e+113
GO:0019783	small conjugating protein-specific protease activity	molecular_function	0.00016355	0.0024902	57	11748	66	17789	30940,224836,83563,384701,22223,22284,71472,74996,170707,76800,104416,216835,59025,327799,112694759,244144,236733,13532,13531,72344,74841,231915,57775,74270,54651,17847,22224,28035,72607,252870,22217,14479,78787,22225,56207,100756,329908,235323,170822,75083,237898,227334,77593,22258,319651,235441,216825,99526,74112,24110,625530,53376,69727,76179,84092,74256,30941
GO:0031406	carboxylic acid binding	molecular_function	0.00024766	0.0037205	20	11748	20	17789	1.82411e+105
GO:0043177	organic acid binding	molecular_function	0.00024766	0.0037205	20	11748	20	17789	1.82411e+105
GO:0016881	acid-amino acid ligase activity	molecular_function	0.00027862	0.0041121	45	11748	51	17789	59026,70790,22200,217558,209462,28000,140629,235439,207304,73998,329152,14897,83814,100763,107568,15204,75788,76608,226098,67588,17999,140630,19647,67345,68497,56424,14629,77853,94253,72137,63958,67138,117146,22215,19373,68350,14854,72106,66313,16396,269700,225164,66894,12211,66156
GO:0042623	ATPase activity, coupled	molecular_function	0.00028344	0.0041649	55	11748	64	17789	67972,21969,74610,27061,76408,74142,239273,66887,20928,11944,19300,11941,21354,56325,12144,74104,26874,74365,320209,11666,56199,224814,12638,18669,74915,13871,20437,20927,14375,28080,22427,27421,72960,269400,14885,244421,27413,58799,21974,11973,17250,11306,244562,21355,19687,73834,320707,381290,18671,12780,27416,237911,22596,19299,381338
GO:0016298	lipase activity	molecular_function	0.00029467	0.0043112	25	11748	26	17789	1.87977e+137
GO:0004721	phosphoprotein phosphatase activity	molecular_function	0.00030137	0.0043902	82	11748	100	17789	435391,56294,56405,19267,252864,13537,24018,19244,66959,19258,63953,18218,19256,19266,72349,19281,19283,545902,237860,15170,100040244,19247,66461,19259,75590,19272,218232,72102,19264,19279,19268,19248,19211,68440,76571,240892,229776,19043,27389,12531,80915,235584,240672,67446,105352,24000,19263,545622,234129,19273,231637,19260,19042,19275,19262,19246,67603,19271,19276,72391,19245,12530,19280,5629…
GO:0004842	ubiquitin-protein ligase activity	molecular_function	0.00031987	0.0046196	41	11748	46	17789	76608,17999,226098,83814,100763,75788,107568,15204,140629,28000,235439,14897,207304,329152,73998,59026,70790,217558,209462,269700,16396,225164,66894,12211,66156,68350,19373,66313,72106,63958,94253,72137,22215,67138,117146,68497,140630,19647,67345,77853,56424
GO:0019787	small conjugating protein ligase activity	molecular_function	0.00031987	0.0046196	41	11748	46	17789	73998,329152,207304,14897,235439,28000,140629,217558,209462,70790,59026,226098,17999,76608,15204,107568,75788,100763,83814,117146,67138,22215,72137,94253,63958,56424,77853,19647,67345,140630,68497,66156,12211,66894,225164,16396,269700,72106,66313,19373,68350
GO:0019199	transmembrane receptor protein kinase activity	molecular_function	0.00037522	0.0053275	19	11748	19	17789	1.21682e+95
GO:0005539	glycosaminoglycan binding	molecular_function	0.00037522	0.0053275	19	11748	19	17789	3.3079e+99
GO:0004620	phospholipase activity	molecular_function	0.00043051	0.0060868	24	11748	25	17789	1.87988e+132
GO:0016879	ligase activity, forming carbon-nitrogen bonds	molecular_function	0.00066868	0.009298	58	11748	69	17789	66313,108156,14854,72106,14450,14645,68350,19373,225164,66894,12211,66156,269700,16396,11565,266744,270685,77853,56424,229487,14629,55936,68497,11566,140630,67345,19647,22215,51797,67138,117146,63958,94253,72137,75788,107568,15204,70988,83814,100763,17999,226098,67588,76608,209462,217558,59026,70790,22200,14897,207304,229363,73998,329152,140629,28000,70396,235439
GO:0016741	transferase activity, transferring one-carbon groups	molecular_function	0.00086084	0.011728	91	11748	114	17789	212728,14056,14450,78796,22017,75284,393082,27374,66617,56335,240879,54632,56095,79565,12846,110599566,98685,52535,554292,78890,231803,18113,67390,100609,329504,106338,67493,74455,116940,229780,106014251,18537,208266,28114,64707,71664,76894,20937,109245,791260,668178,239122,216188,52064,15468,69487,235626,101867,69156,70152,319263,14792,18416,245867,75894,75430,77683,72181,319582,17299,17314,6804…
GO:0008373	sialyltransferase activity	molecular_function	0.00091491	0.012364	22	11748	23	17789	2.25742e+113
GO:0008168	methyltransferase activity	molecular_function	0.0011858	0.015835	84	11748	105	17789	27374,75284,393082,22017,78796,14056,212728,52535,98685,110599566,12846,79565,56095,54632,56335,240879,66617,116940,74455,67493,106338,329504,100609,67390,18113,231803,78890,554292,235626,69487,15468,52064,239122,668178,791260,20937,109245,76894,71664,28114,64707,208266,18537,229780,106014251,75894,245867,14792,319263,69156,70152,101867,234728,110147,69740,68043,17314,17299,72181,319582,77683,754…
GO:0008378	galactosyltransferase activity	molecular_function	0.0013046	0.017149	16	11748	16	17789	9.74409e+89
GO:0004190	aspartic-type endopeptidase activity	molecular_function	0.0013046	0.017149	16	11748	16	17789	6.65527e+82
GO:0070001	aspartic-type peptidase activity	molecular_function	0.0013046	0.017149	16	11748	16	17789	7.85932e+82
GO:0019838	growth factor binding	molecular_function	0.0013306	0.017281	21	11748	22	17789	5.62133e+106
GO:0032403	protein complex binding	molecular_function	0.0013999	0.017843	29	11748	32	17789	1.34492e+151
GO:0015079	potassium ion transmembrane transporter activity	molecular_function	0.0014481	0.018388	36	11748	41	17789	2.46133e+190
GO:0005231	excitatory extracellular ligand-gated ion channel activity	molecular_function	0.0014602	0.018403	25	11748	27	17789	9.40451e+129
GO:0030545	receptor regulator activity	molecular_function	0.0016054	0.019934	180	11748	240	17789	14166,21803,83430,18159,14174,67000,80903,14573,57263,56744,12977,12160,53603,14175,22353,20301,16334,100504346,14168,330122,20305,57264,230899,20312,54635,16333,20310,15945,14167,14178,22340,16323,67112,20287,16336,14164,12165,14563,18654,15874,18188,242316,20309,57349,67405,12155,21809,14170,12154,18591,56221,110312,16325,16158,18119,19109,16196,20303,18413,16000,17329,20292,100042493,20299,115…
GO:0030546	receptor activator activity	molecular_function	0.0016054	0.019934	180	11748	240	17789	83428,93898,14599,320202,64654,100504239,319552,13590,12164,14179,67505,16322,14825,14419,19226,14177,14562,56838,20297,18829,19113,12156,80857,245195,14180,12985,12162,20300,56069,12918,19227,20315,21808,217212,27356,14205,12981,17700,22341,12163,16171,11516,140806,54189,223780,116903,16159,19111,14256,20307,16183,14566,12424,57266,18590,110075,73244,16187,14526,75317,70314,14169,67310,14176,181…
GO:0048018	receptor agonist activity	molecular_function	0.0016054	0.019934	180	11748	240	17789	110312,16325,16158,18119,19109,20303,16196,18413,21809,14170,12154,56221,18591,242316,20309,57349,12155,67405,14563,18654,18188,15874,12310,18814,16326,14165,20856,55985,171530,21832,20308,30878,12854,77125,12640,100042493,20299,257630,11535,14560,16000,17329,20292,14175,22353,100504346,16334,20301,330122,14168,20305,14573,57263,56744,12977,12160,53603,18159,67000,14174,80903,14166,21803,83430,14…
GO:0005520	insulin-like growth factor binding	molecular_function	0.0019316	0.022621	20	11748	21	17789	7.19241e+101
GO:0005267	potassium channel activity	molecular_function	0.0019428	0.022621	35	11748	40	17789	2.27633e+185
GO:0003950	NAD+ ADP-ribosyltransferase activity	molecular_function	0.0019764	0.022621	15	11748	15	17789	6.72877e+81
GO:0003674	molecular_function	molecular_function	0.0026396	0.02951	10261	11748	15446	17789	12908,14107,269633,24071,331374,20544,227632,327799,218756,239546,18173,20444,70425,116873,15550,269523,434540,214425,19820,18488,224661,66556,103978,56752,54125,13486,14419,76441,21975,13096,103711,19419,98932,545925,216441,353211,319184,100504239,433375,16798,171250,12164,271697,27054,18639,14603,53861,73139,268481,74153,224044,228961,19826,71966,57810,66065,109552,14810,71640,71601,28185,27181…
GO:0019842	vitamin binding	molecular_function	0.0029144	0.032049	40	11748	47	17789	###############################################################################################################################################################################################################################################################
GO:0016410	N-acyltransferase activity	molecular_function	0.0029144	0.032049	40	11748	47	17789	435528,73242,107146,18107,17975,64697,97243,20229,27366,56441,70999,98956,67877,54342,74763,93674,228714,107435,72117,69215,73809,269642,100043497,69049,328572,66176,12914,14534,117903916,75541,93673,240549,66116,18108,100504710,11298,11655,18519,70646,56292
GO:0016810	hydrolase activity, acting on carbon-nitrogen (but not peptide) bonds	molecular_function	0.0029732	0.032393	43	11748	51	17789	78914,94191,245847,56417,11628,18602,57757,26464,65254,216456,27045,80287,110532,94184,11811,171168,76773,69719,64705,14660,18601,30947,75773,21744,11810,22240,18600,18599,26757,22361,242726,103149,12933,71761,94041,18203,14544,108147,26363,384997,12934,230379,66190
GO:0008375	acetylglucosaminyltransferase activity	molecular_function	0.0029939	0.032393	14	11748	14	17789	1.45371e+75
GO:0005540	hyaluronic acid binding	molecular_function	0.0029939	0.032393	14	11748	14	17789	1.29501e+74
GO:0016705	oxidoreductase activity, acting on paired donors, with incorporation or reduction of molecular oxygen	molecular_function	0.0032417	0.034851	122	11748	160	17789	13113,13107,11757,244209,76279,13115,170716,13119,13112,56050,67667,320769,208285,13123,232174,104086,13086,545288,622127,13124,56448,226564,18484,107141,243881,13077,242546,81906,74519,70101,13070,226565,223706,100043108,18452,384724,13078,100066,59012,13166,55990,56388,21391,72082,13108,11758,18478,14261,13116,224044,13117,71519,19223,18127,13081,21823,666168,14263,380997,74134,13106,21990,6438…
GO:0004872	receptor activity	molecular_function	0.003403	0.036469	649	11748	925	17789	328759,70355,672125,107515,319239,666085,171224,18216,11481,384534,100042591,12671,68278,16190,18241,171247,171199,81017,627805,171259,171203,11477,17202,84111,667060,11552,226304,11542,100042921,625823,107831,14309,667180,100038941,67168,546980,83770,110637,171201,170757,246313,433070,18605,237362,623734,22355,110789,627132,330581,381853,12168,20132,15465,19206,16995,13869,171256,100312485,23307…
GO:0008080	N-acetyltransferase activity	molecular_function	0.003465	0.037015	33	11748	38	17789	2.02293e+180
GO:0008092	cytoskeletal protein binding	molecular_function	0.0035639	0.037951	136	11748	180	17789	16552,16569,16574,226251,231148,13367,13823,16570,16565,225115,19684,17762,12386,11567,63985,17756,73470,22379,16568,27428,66468,666244,72726,109242,75050,16578,103268,78478,241431,93689,56223,13821,100764,211401,668880,71774,18016,269152,21894,52563,68524,399591,57778,110380,19230,22350,215114,70435,17698,227634,56419,13169,14086,215008,216033,215280,16563,242687,71819,16551,73178,208846,100732,…
GO:0008138	protein tyrosine/serine/threonine phosphatase activity	molecular_function	0.0037972	0.040308	39	11748	46	17789	###############################################################################################################################################################################################################################################################
GO:0016874	ligase activity	molecular_function	0.0038756	0.041011	111	11748	145	17789	67138,51797,105148,94253,28088,229487,14629,107508,67345,19647,225164,66156,381314,11565,16396,270685,66590,67789,319583,14854,23874,14450,108156,19373,68350,15115,229363,207304,329152,100705,14897,140629,71984,224805,226414,217558,209462,22375,85305,70790,59026,67588,69372,17999,83669,110960,76608,71941,107568,382137,97541,70988,15204,27267,22201,71807,70223,107476,117146,68915,22215,72137,74153…
GO:0004112	cyclic-nucleotide phosphodiesterase activity	molecular_function	0.0040702	0.042934	22	11748	24	17789	1.85762e+116
GO:0004527	exonuclease activity	molecular_function	0.004535	0.047246	13	11748	13	17789	1.89682e+65
GO:1901682	sulfur compound transmembrane transporter activity	molecular_function	0.004535	0.047246	13	11748	13	17789	2.68512e+72
8,71306,216151,15204,229715,14797,20843,23792,212508,232976,68964,15218,19128,17119,56199,81877,330502,332175,71375,55990,231296,329207,11800,22160,17928,54713,328695,30931,72145,235611,213498,20595,232430,76740,70314,242418,26909,17973,69983,70247,627049,72183,104015,75410,73368,268752,74478,12013,18423,16948,235320,56041,58805,20815,381626,320332,66311,18992,234135,70930,22186,19094,76022,22434…
[truncated: 2 more rows]

## Sheet: HyperTHvsControl
GO_accession	Description	Term_type	Over_represented_pValue	Corrected_pValue	CAD_item	CAD_list	Bg_item	Bg_list	Gene_names
[truncated: 362 more rows]

## Sheet: HyperTHvsHypoTH
GO_accession	Description	Term_type	Over_represented_pValue	Corrected_pValue	CAD_item	CAD_list	Bg_item	Bg_list	Gene_names
[truncated: 308 more rows]

## Sheet: HyperTHvsHypoTH+T3
GO_accession	Description	Term_type	Over_represented_pValue	Corrected_pValue	CAD_item	CAD_list	Bg_item	Bg_list	Gene_names
[truncated: 294 more rows]
