# Supplementary material for: Novel Transcriptomic Interactomes of Noncoding RNAs in the Heart under Altered Thyroid Hormonal States
Source: Int J Mol Sci. 2023 Mar 31;24(7):6560. doi: 10.3390/ijms24076560 (PMC10095585; doi:10.3390/ijms24076560)
Supplement: Supplementary file 1 [file ijms-24-06560-s001.zip › Supplemental File S9 miRNA KEGG enrichment all GroupWise comparisons.xlsx]

## Sheet: HypoTH vs Control
##Databases: KEGG PATHWAY
##Statistical test method: hypergeometric test / Fisher's exact test
##FDR correction method: Benjamini and Hochberg
#Term	Database	ID	Input number	Background number	P-Value	Corrected P-Value	Input	Hyperlink
Metabolic pathways	KEGG PATHWAY	mmu01100	887	1298	4.71e-39	1.38e-36	78914|20447|110006|20916|320302|20442|20441|14854|110417|240752|243085|20917|20449|19714|20444|20443|11984|77042|64918|18950|13088|19012|107885|20440|13081|22262|269180|269181|225010|13244|12091|100163|108902|18778|29858|241452|230379|11821|67574|74409|71911|320951|20448|235386|53418|22169|72297|27402|27400|78038|67078|69888|68738|67073|100705|231510|78625|56752|15531|15926|67311|242291|74241|276…	http://www.genome.jp/kegg-bin/show_pathway?mmu01100/mmu:666168%09red/mmu:231510%09red/mmu:270084%09red/mmu:13200%09red/mmu:18946%09red/mmu:66966%09red/mmu:74185%09red/mmu:237625%09red/mmu:94284%09red/mmu:100163%09red/mmu:67164%09red/mmu:96979%09red/mmu:331487%09red/mmu:70428%09red/mmu:13195%09red/mmu:11821%09red/mmu:268860%09red/mmu:14593%09red/mmu:70881%09red/mmu:20021%09red/mmu:20022%09red/mmu:…
Olfactory transduction	KEGG PATHWAY	mmu04740	744	1102	1.08e-31	1.59e-29	257985|14918|14919|258257|258522|258398|258520|258394|258397|258330|258258|258259|258528|258392|258158|258156|258154|258153|258151|108058|258320|258321|258322|258323|258324|258325|258326|258327|258328|258329|258525|546747|258984|258985|258631|258636|258982|258983|258733|233649|258731|258737|258989|258734|18372|18373|18370|57269|545205|404327|259048|259049|259123|259122|218066|259040|259041|259046…	http://www.genome.jp/kegg-bin/show_pathway?mmu04740/mmu:18361%09red/mmu:258408%09red/mmu:258409%09red/mmu:258402%09red/mmu:258403%09red/mmu:258067%09red/mmu:258406%09red/mmu:258407%09red/mmu:258405%09red/mmu:257910%09red/mmu:257913%09red/mmu:257884%09red/mmu:257917%09red/mmu:257916%09red/mmu:258154%09red/mmu:259017%09red/mmu:259014%09red/mmu:259015%09red/mmu:258151%09red/mmu:236509%09red/mmu:2590…
Pathways in cancer	KEGG PATHWAY	mmu05200	340	398	3.06e-26	2.99e-24	14174|14175|14176|20848|14170|14171|14172|94216|19713|12928|14674|14178|14672|18095|56636|15519|14177|14268|269209|12061|54354|22034|56637|19225|12370|12371|19016|18797|14679|12675|67168|19395|14678|20375|67673|12929|240168|19645|93897|80903|20850|19401|12159|16779|14102|65086|12395|11836|14673|11835|14173|20846|22029|12828|12829|19419|14062|17390|93735|14065|17395|12156|11652|14745|56438|12385|2…	http://www.genome.jp/kegg-bin/show_pathway?mmu05200/mmu:16773%09red/mmu:14013%09red/mmu:432530%09red/mmu:319757%09red/mmu:15234%09red/mmu:72993%09red/mmu:22340%09red/mmu:67673%09red/mmu:57265%09red/mmu:18854%09red/mmu:14688%09red/mmu:56289%09red/mmu:170758%09red/mmu:56044%09red/mmu:22423%09red/mmu:16412%09red/mmu:20663%09red/mmu:64143%09red/mmu:64654%09red/mmu:19697%09red/mmu:15251%09red/mmu:1386…
Rap1 signaling pathway	KEGG PATHWAY	mmu04015	190	215	2.64e-16	1.94e-14	58220|14175|14176|18645|14170|18643|12927|14678|12929|18760|18762|14178|13836|56636|382562|11540|14177|20779|12977|54354|16334|14171|13636|13637|18796|18797|14172|19395|15901|18798|26397|13638|13639|11465|50791|14924|11461|12928|16001|110157|30955|494124|65086|29857|93737|13489|14065|14062|12388|14745|18803|210044|12387|14182|14184|64143|109905|14180|14183|18176|21844|217692|16415|26413|16416|264…	http://www.genome.jp/kegg-bin/show_pathway?mmu04015/mmu:18176%09red/mmu:432530%09red/mmu:70405%09red/mmu:16590%09red/mmu:79264%09red/mmu:21844%09red/mmu:170758%09red/mmu:56044%09red/mmu:64143%09red/mmu:75292%09red/mmu:227377%09red/mmu:238130%09red/mmu:16409%09red/mmu:104111%09red/mmu:18053%09red/mmu:20130%09red/mmu:50791%09red/mmu:64654%09red/mmu:14176%09red/mmu:67112%09red/mmu:382562%09red/mmu:9…
Regulation of actin cytoskeleton	KEGG PATHWAY	mmu04810	191	218	3.94e-16	2.12e-14	76884|14175|14176|18645|237860|18643|77579|216963|12929|12928|14674|14178|22376|56636|15461|14177|14268|14170|11789|13367|319480|30938|12927|16334|16420|14173|12671|20779|381924|11465|11461|13649|192897|80903|544963|18481|50884|11836|14673|243764|54126|382562|12061|12062|14062|14061|59310|12669|14180|14183|14182|14184|101314|19303|20430|108100|68089|226970|242687|18479|329251|21844|16415|26413|19…	http://www.genome.jp/kegg-bin/show_pathway?mmu04810/mmu:76884%09red/mmu:67771%09red/mmu:170758%09red/mmu:237860%09red/mmu:329165%09red/mmu:70584%09red/mmu:16408%09red/mmu:20130%09red/mmu:18709%09red/mmu:320910%09red/mmu:77579%09red/mmu:64654%09red/mmu:216963%09red/mmu:404710%09red/mmu:67112%09red/mmu:23805%09red/mmu:382562%09red/mmu:105855%09red/mmu:14165%09red/mmu:73341%09red/mmu:214230%09red/mm…
Ras signaling pathway	KEGG PATHWAY	mmu04014	198	231	5.21e-16	2.12e-14	14174|14175|14176|14177|14170|14171|14172|14173|54601|14178|13836|56636|70405|18015|12977|54354|16334|13636|13637|12675|19395|13638|13639|11600|240168|80903|225870|110157|18481|18778|494124|66482|18805|18806|271849|18803|271844|14180|14183|26565|14184|19418|64143|109905|19414|19415|19417|14182|18479|18176|18654|21844|72399|26413|70584|26417|26414|16542|26419|14205|232889|23872|14697|14696|19419|1…	http://www.genome.jp/kegg-bin/show_pathway?mmu04014/mmu:13638%09red/mmu:237625%09red/mmu:21844%09red/mmu:14688%09red/mmu:56289%09red/mmu:19696%09red/mmu:56044%09red/mmu:11600%09red/mmu:64143%09red/mmu:70584%09red/mmu:54153%09red/mmu:19345%09red/mmu:19344%09red/mmu:18749%09red/mmu:18053%09red/mmu:20130%09red/mmu:16706%09red/mmu:14708%09red/mmu:64654%09red/mmu:67112%09red/mmu:14702%09red/mmu:14700%…
MAPK signaling pathway	KEGG PATHWAY	mmu04010	211	254	5.63e-16	2.12e-14	14174|14175|18099|30957|14170|14171|14172|16476|12929|12928|16765|14178|14176|13714|17164|17165|18015|56692|12294|58226|12675|381921|14173|240168|63953|80903|73086|22030|56274|14102|19279|14673|29857|110651|26401|26400|26405|26404|26407|26406|26409|26408|70686|286940|12064|15507|19060|60597|12531|192176|14180|14183|14182|14184|19418|271844|109905|16176|16177|67603|67071|78405|19417|320139|18479|1…	http://www.genome.jp/kegg-bin/show_pathway?mmu04010/mmu:17165%09red/mmu:56808%09red/mmu:14013%09red/mmu:109689%09red/mmu:216869%09red/mmu:21812%09red/mmu:17164%09red/mmu:19697%09red/mmu:170758%09red/mmu:21813%09red/mmu:19417%09red/mmu:19698%09red/mmu:21926%09red/mmu:12296%09red/mmu:12297%09red/mmu:12294%09red/mmu:12295%09red/mmu:12293%09red/mmu:12290%09red/mmu:12291%09red/mmu:18749%09red/mmu:1821…
PI3K-Akt signaling pathway	KEGG PATHWAY	mmu04151	264	350	5.8e-16	2.12e-14	14174|74551|14176|17763|14170|12978|14172|94216|22371|13640|14178|13836|56637|56636|12833|14177|14268|12834|16334|12839|14171|14062|12371|12675|67168|14173|13638|13639|11600|20963|192897|52432|80903|16001|26932|22084|16779|65086|16773|320795|12828|12829|12826|12827|26931|13685|13684|15519|21770|14745|12669|14180|14183|14182|14184|12539|78134|19651|17246|16185|18414|226849|226519|12571|18176|26413…	http://www.genome.jp/kegg-bin/show_pathway?mmu04151/mmu:13685%09red/mmu:16773%09red/mmu:13638%09red/mmu:67168%09red/mmu:13684%09red/mmu:15976%09red/mmu:15975%09red/mmu:19697%09red/mmu:170755%09red/mmu:11600%09red/mmu:19699%09red/mmu:22627%09red/mmu:59032%09red/mmu:81877%09red/mmu:245026%09red/mmu:18053%09red/mmu:14083%09red/mmu:16779%09red/mmu:12827%09red/mmu:19052%09red/mmu:12829%09red/mmu:12828…
Proteoglycans in cancer	KEGG PATHWAY	mmu05205	183	208	1.23e-15	4e-14	20848|14173|93897|286940|22408|20779|75705|15200|18792|17246|12402|16412|11465|16160|11461|20969|18569|14102|327826|11836|108058|29857|15430|22160|17390|93735|17395|109676|16440|12389|11652|18803|192176|12387|14182|20423|19303|13345|14268|16438|18479|329251|15530|21844|19206|26413|19878|16416|26416|26417|109880|26415|16542|16419|16439|22420|12443|12505|83383|12390|12391|29875|26396|110157|15529|1…	http://www.genome.jp/kegg-bin/show_pathway?mmu05205/mmu:319757%09red/mmu:13207%09red/mmu:21844%09red/mmu:13982%09red/mmu:20423%09red/mmu:21926%09red/mmu:14368%09red/mmu:13867%09red/mmu:93897%09red/mmu:14362%09red/mmu:18749%09red/mmu:22422%09red/mmu:14365%09red/mmu:22420%09red/mmu:22421%09red/mmu:14366%09red/mmu:16147%09red/mmu:11735%09red/mmu:11733%09red/mmu:20130%09red/mmu:14388%09red/mmu:19684%…
Axon guidance	KEGG PATHWAY	mmu04360	161	176	6.58e-15	1.93e-13	58220|13836|13837|107448|107449|14679|14678|14677|13640|13838|13839|56637|218877|20779|237860|18019|20562|20563|13636|13637|16412|13638|13639|319713|19649|13841|18481|13842|13844|12934|13846|13848|108058|14159|93737|14064|268902|18803|20360|20361|20423|223881|12632|18479|18176|19206|20357|26413|20355|20354|20353|20352|20351|20350|19877|20358|19878|170758|110157|259302|19353|19354|319757|18186|166…	http://www.genome.jp/kegg-bin/show_pathway?mmu04360/mmu:20355%09red/mmu:18186%09red/mmu:20350%09red/mmu:319757%09red/mmu:65254%09red/mmu:26456%09red/mmu:237860%09red/mmu:18709%09red/mmu:70584%09red/mmu:14159%09red/mmu:20423%09red/mmu:14365%09red/mmu:20130%09red/mmu:19055%09red/mmu:17973%09red/mmu:17974%09red/mmu:19059%09red/mmu:19058%09red/mmu:16728%09red/mmu:50780%09red/mmu:20315%09red/mmu:18176…
Endocytosis	KEGG PATHWAY	mmu04144	226	294	1.76e-14	4.7e-13	58220|110557|72318|16185|216963|19713|69150|18762|22376|20844|12774|15461|20779|72543|83814|259300|19349|15043|15042|14772|14773|232227|22365|12402|16572|30930|52055|19344|19159|19158|17274|16001|66371|69710|11773|18805|98366|14990|107305|22088|93737|16574|56324|14062|16573|347722|18806|14991|12389|15006|211914|14183|57440|14184|17999|225861|71770|11771|17246|68089|11772|73711|320129|13854|13855|…	http://www.genome.jp/kegg-bin/show_pathway?mmu04144/mmu:15006%09red/mmu:17274%09red/mmu:109689%09red/mmu:72543%09red/mmu:18854%09red/mmu:14972%09red/mmu:67771%09red/mmu:211673%09red/mmu:74002%09red/mmu:13196%09red/mmu:13867%09red/mmu:19349%09red/mmu:19326%09red/mmu:19345%09red/mmu:19344%09red/mmu:26385%09red/mmu:68089%09red/mmu:19341%09red/mmu:218038%09red/mmu:13869%09red/mmu:72685%09red/mmu:8409…
cAMP signaling pathway	KEGG PATHWAY	mmu04024	169	198	8.75e-14	2.14e-12	16476|14679|14678|14677|242425|15166|11540|18018|215449|19013|14062|13489|13488|12315|18805|110157|18166|20605|18160|20609|108058|381290|11936|67972|12064|208188|18806|320707|12669|210044|20682|12789|12788|109905|328572|13492|18479|21844|233649|242443|109648|19206|26413|19878|26417|109880|53623|26419|19877|20191|170758|13617|56508|12313|11938|78284|12790|11933|11932|11931|19353|16890|19218|19354|…	http://www.genome.jp/kegg-bin/show_pathway?mmu04024/mmu:432530%09red/mmu:11430%09red/mmu:21844%09red/mmu:18708%09red/mmu:11539%09red/mmu:19697%09red/mmu:170758%09red/mmu:233649%09red/mmu:104111%09red/mmu:13617%09red/mmu:18749%09red/mmu:56508%09red/mmu:20130%09red/mmu:271639%09red/mmu:11928%09red/mmu:14677%09red/mmu:14800%09red/mmu:14802%09red/mmu:238871%09red/mmu:108058%09red/mmu:109905%09red/mmu…
HTLV-I infection	KEGG PATHWAY	mmu05166	219	295	5.04e-13	1.14e-11	110557|13712|16476|93897|73181|56637|15461|59001|17000|18019|17864|11789|67967|59008|15043|15042|30939|66440|12675|20375|11910|19056|56150|16169|16168|52206|20851|18033|50883|382056|66156|26401|66979|26406|93735|18708|14990|14991|103573|210044|12387|13557|13555|13383|328572|16177|11908|11909|14998|18176|60599|11920|17222|16415|16414|17702|22408|13542|13543|26419|17701|22421|12257|23872|23871|1250…	http://www.genome.jp/kegg-bin/show_pathway?mmu05166/mmu:18186%09red/mmu:432530%09red/mmu:16818%09red/mmu:237336%09red/mmu:12916%09red/mmu:14972%09red/mmu:19697%09red/mmu:21813%09red/mmu:19698%09red/mmu:72049%09red/mmu:67967%09red/mmu:14368%09red/mmu:14369%09red/mmu:21752%09red/mmu:93897%09red/mmu:104111%09red/mmu:14362%09red/mmu:18749%09red/mmu:22422%09red/mmu:14365%09red/mmu:22420%09red/mmu:2242…
Hippo signaling pathway	KEGG PATHWAY	mmu04390	138	154	1.47e-12	3.07e-11	58220|16475|15902|27494|15901|93897|18762|56637|18016|11789|23859|11465|319710|11461|22628|21813|21812|241324|21679|21678|21677|21676|14219|93737|93735|27373|53310|12385|12387|12386|209456|16415|16414|22409|22408|13542|13543|22423|13385|12159|12156|101543|16897|105782|57265|56217|22418|22419|22416|22417|22414|22415|22412|22413|22410|22411|93960|211652|12006|19046|19045|12005|16798|20583|22627|226…	http://www.genome.jp/kegg-bin/show_pathway?mmu04390/mmu:56289%09red/mmu:12695%09red/mmu:22627%09red/mmu:14368%09red/mmu:14369%09red/mmu:27494%09red/mmu:93897%09red/mmu:14362%09red/mmu:22422%09red/mmu:14365%09red/mmu:14366%09red/mmu:14367%09red/mmu:53310%09red/mmu:27373%09red/mmu:19053%09red/mmu:19052%09red/mmu:20583%09red/mmu:93960%09red/mmu:23805%09red/mmu:52432%09red/mmu:242316%09red/mmu:22413%…
Focal adhesion	KEGG PATHWAY	mmu04510	166	203	1.63e-12	3.19e-11	16476|12927|94216|12929|12928|22371|56637|286940|12833|20779|12834|12839|13367|319480|11465|64099|11461|13649|192897|11855|170736|16779|16773|12828|12829|12826|12827|59310|12389|271849|192176|12387|12845|109905|19303|14268|226519|18479|329251|57342|22793|26413|19878|16416|26417|109880|16412|16542|26419|16419|19877|17906|14205|107589|16780|16782|107746|170758|215449|11474|12390|12391|54635|110157|…	http://www.genome.jp/kegg-bin/show_pathway?mmu04510/mmu:16773%09red/mmu:16779%09red/mmu:170758%09red/mmu:19699%09red/mmu:22793%09red/mmu:70584%09red/mmu:13866%09red/mmu:12387%09red/mmu:245026%09red/mmu:14083%09red/mmu:18709%09red/mmu:12827%09red/mmu:12826%09red/mmu:12829%09red/mmu:12828%09red/mmu:11855%09red/mmu:13712%09red/mmu:64099%09red/mmu:214230%09red/mmu:16202%09red/mmu:14254%09red/mmu:1425…
Neuroactive ligand-receptor interaction	KEGG PATHWAY	mmu04080	209	285	3.75e-12	6.87e-11	12921|12922|93896|242425|67373|11542|54598|26361|11548|11549|14064|22072|16846|14800|11540|13617|67168|12671|11441|13489|13488|110886|14803|18389|17202|18387|18440|12273|110637|239845|18167|18166|217369|18442|65086|237362|20609|12311|216749|12061|12062|14065|14062|14063|14061|140795|208188|19065|14745|12669|94045|13609|504186|78134|18390|13491|12267|108043|14715|19204|19219|12425|12426|17199|5362…	http://www.genome.jp/kegg-bin/show_pathway?mmu04080/mmu:14401%09red/mmu:14394%09red/mmu:14397%09red/mmu:14396%09red/mmu:14405%09red/mmu:14404%09red/mmu:14407%09red/mmu:99296%09red/mmu:67168%09red/mmu:14408%09red/mmu:14715%09red/mmu:14403%09red/mmu:11435%09red/mmu:11539%09red/mmu:110637%09red/mmu:239336%09red/mmu:108043%09red/mmu:22355%09red/mmu:18440%09red/mmu:18216%09red/mmu:13618%09red/mmu:9389…
Calcium signaling pathway	KEGG PATHWAY	mmu04020	150	182	1.25e-11	2.16e-10	105675|16867|58226|14676|14675|56632|14672|11540|26361|11548|11549|18795|18796|18797|114875|12671|11607|13488|53313|494124|18679|243764|67972|12061|12062|14062|16440|320707|18802|18803|94045|12669|110893|210044|13492|19204|12425|12426|107589|20698|20191|20192|18596|13617|11441|12315|12313|11938|11937|320404|54652|110094|233011|19218|14829|13869|58861|13867|13866|19220|19216|108071|54140|14682|146…	http://www.genome.jp/kegg-bin/show_pathway?mmu04020/mmu:12494%09red/mmu:432530%09red/mmu:73333%09red/mmu:18440%09red/mmu:21924%09red/mmu:13866%09red/mmu:13867%09red/mmu:18216%09red/mmu:13618%09red/mmu:12290%09red/mmu:12291%09red/mmu:104111%09red/mmu:13617%09red/mmu:18749%09red/mmu:13869%09red/mmu:19055%09red/mmu:19220%09red/mmu:19056%09red/mmu:19229%09red/mmu:19059%09red/mmu:19058%09red/mmu:53313…
Signaling pathways regulating pluripotency of stem cells	KEGG PATHWAY	mmu04550	123	140	5.47e-11	8.9e-10	15904|20848|15902|15903|15901|19712|56637|18014|16600|51869|11789|21405|14173|15209|18423|93897|110157|16468|29857|93735|16873|14183|14182|14184|13395|76073|11906|55994|12387|11479|16878|18176|13544|26413|26416|26417|13542|26415|13990|26396|12159|12156|17125|12151|16326|16324|16323|57265|22658|16653|69587|17877|15407|22418|22419|22416|22417|22414|22415|22412|22413|22410|22411|269275|12006|12005|1…	http://www.genome.jp/kegg-bin/show_pathway?mmu04550/mmu:14368%09red/mmu:14369%09red/mmu:15904%09red/mmu:18508%09red/mmu:93897%09red/mmu:16326%09red/mmu:14362%09red/mmu:22422%09red/mmu:14365%09red/mmu:22420%09red/mmu:14367%09red/mmu:22658%09red/mmu:11479%09red/mmu:16324%09red/mmu:22421%09red/mmu:16878%09red/mmu:11480%09red/mmu:11481%09red/mmu:17268%09red/mmu:23805%09red/mmu:13990%09red/mmu:22416%0…
mTOR signaling pathway	KEGG PATHWAY	mmu04150	132	156	6.23e-11	9.61e-10	72149|29869|93897|56637|17168|75705|319481|12675|216742|329679|16001|66508|22084|320311|97998|75425|110651|277854|93735|13685|13684|230784|16973|27401|16974|56430|67071|18176|71718|13544|26413|22409|26417|109880|13543|20111|74747|20112|109270|26396|110157|17254|22241|105787|108079|23797|57265|19211|16653|227154|20539|78757|110379|22418|22419|22416|22417|22414|22415|22412|22413|22410|22411|56692|2…	http://www.genome.jp/kegg-bin/show_pathway?mmu04150/mmu:13684%09red/mmu:13685%09red/mmu:22084%09red/mmu:17168%09red/mmu:52187%09red/mmu:21926%09red/mmu:72124%09red/mmu:14368%09red/mmu:14369%09red/mmu:14245%09red/mmu:93897%09red/mmu:14362%09red/mmu:22422%09red/mmu:14365%09red/mmu:22420%09red/mmu:14367%09red/mmu:14366%09red/mmu:216742%09red/mmu:56692%09red/mmu:16367%09red/mmu:110935%09red/mmu:22416…
Oxytocin signaling pathway	KEGG PATHWAY	mmu04921	133	158	6.7e-11	9.82e-10	16476|54720|14679|14678|14677|54195|70405|20779|18019|12294|18795|18796|18797|13631|18798|11465|26396|11461|12313|494124|18160|108058|215303|56808|60596|271844|210044|12300|238564|18176|16519|26413|19878|26417|108099|17904|19877|232889|18018|20191|20192|19079|329251|241113|12315|110157|216459|319734|105787|81904|108079|54652|16653|12443|28240|14682|14683|14681|19047|19046|19045|11513|11512|12323|…	http://www.genome.jp/kegg-bin/show_pathway?mmu04921/mmu:12494%09red/mmu:432530%09red/mmu:215303%09red/mmu:241113%09red/mmu:211480%09red/mmu:12296%09red/mmu:12297%09red/mmu:12294%09red/mmu:12295%09red/mmu:12293%09red/mmu:104111%09red/mmu:18749%09red/mmu:12298%09red/mmu:19055%09red/mmu:19056%09red/mmu:19225%09red/mmu:19059%09red/mmu:19058%09red/mmu:17260%09red/mmu:16519%09red/mmu:16518%09red/mmu:10…
Sphingolipid signaling pathway	KEGG PATHWAY	mmu04071	112	125	1.77e-10	2.46e-09	93898|14678|14677|18762|14673|11542|20773|18795|18796|18797|14679|18798|54447|70059|13244|18386|56632|67260|230379|29857|26408|12062|26931|26932|18805|18806|11652|21770|13609|81535|619326|235542|226849|241447|18176|26413|19878|26416|11886|26414|26415|26419|19877|20698|170758|13610|26396|110157|20597|17250|20598|19353|19354|14127|14126|228677|19211|16653|94226|268656|26420|545975|14682|21926|17116…	http://www.genome.jp/kegg-bin/show_pathway?mmu04071/mmu:268656%09red/mmu:235542%09red/mmu:11539%09red/mmu:19697%09red/mmu:170758%09red/mmu:71609%09red/mmu:433323%09red/mmu:21926%09red/mmu:59032%09red/mmu:93898%09red/mmu:13610%09red/mmu:19054%09red/mmu:19053%09red/mmu:19052%09red/mmu:228677%09red/mmu:14389%09red/mmu:52432%09red/mmu:20698%09red/mmu:26396%09red/mmu:13609%09red/mmu:19354%09red/mmu:22…
Phospholipase D signaling pathway	KEGG PATHWAY	mmu04072	124	146	1.97e-10	2.63e-09	72318|14674|14673|108068|380921|18796|18797|19012|67168|18798|11607|20963|19159|19158|110524|19157|22084|30955|65086|227333|26361|14062|18805|18806|271849|14745|18803|271844|210044|64143|78134|18176|103967|320127|26413|26417|13429|232889|20698|20130|26396|17311|54635|56508|110157|17532|18795|14127|14126|16653|108071|56044|108073|108072|54140|14683|11514|11513|11512|68262|224129|223864|217480|1313…	http://www.genome.jp/kegg-bin/show_pathway?mmu04072/mmu:432530%09red/mmu:380921%09red/mmu:268934%09red/mmu:11607%09red/mmu:56044%09red/mmu:64143%09red/mmu:67916%09red/mmu:104111%09red/mmu:20130%09red/mmu:67168%09red/mmu:19220%09red/mmu:19229%09red/mmu:19158%09red/mmu:14388%09red/mmu:14389%09red/mmu:20698%09red/mmu:54140%09red/mmu:26396%09red/mmu:54635%09red/mmu:15461%09red/mmu:28169%09red/mmu:675…
Insulin signaling pathway	KEGG PATHWAY	mmu04910	121	142	2.83e-10	3.6e-09	74551|12929|12928|19268|56637|16370|19017|12402|104215|26396|110157|18762|494124|14104|11836|18679|12703|12702|53412|53413|13685|13684|19062|271849|100705|18176|105651|26413|244416|109880|26419|107746|19079|241113|12315|12313|110094|16890|105787|108079|16653|14121|14120|110078|26420|19047|19046|19045|18576|56458|14936|16150|18749|54646|70405|16334|16337|20528|15277|18607|18707|72508|26417|23797|5…	http://www.genome.jp/kegg-bin/show_pathway?mmu04910/mmu:13684%09red/mmu:13685%09red/mmu:228966%09red/mmu:241113%09red/mmu:16370%09red/mmu:104215%09red/mmu:64930%09red/mmu:18749%09red/mmu:68961%09red/mmu:100705%09red/mmu:16367%09red/mmu:18679%09red/mmu:16369%09red/mmu:14251%09red/mmu:14252%09red/mmu:23921%09red/mmu:19046%09red/mmu:19045%09red/mmu:434233%09red/mmu:15461%09red/mmu:18576%09red/mmu:10…
Wnt signaling pathway	KEGG PATHWAY	mmu04310	123	146	3.28e-10	4e-09	16476|18099|20671|93897|75826|56637|21372|18019|18018|56811|11789|20379|18795|18796|18797|27412|18798|20377|81004|13000|108058|26409|93735|27373|56438|16973|12387|16974|13016|13017|328572|74499|13544|19878|68010|22408|13542|13543|26419|53627|208846|170758|93687|13380|14296|67772|56505|19353|19354|57265|12914|20437|12995|22418|22419|22416|93840|22414|22415|22412|14735|22410|26420|93960|12006|12005…	http://www.genome.jp/kegg-bin/show_pathway?mmu04310/mmu:27412%09red/mmu:19353%09red/mmu:170758%09red/mmu:67772%09red/mmu:14368%09red/mmu:14369%09red/mmu:93897%09red/mmu:14362%09red/mmu:18749%09red/mmu:22422%09red/mmu:14365%09red/mmu:22420%09red/mmu:14367%09red/mmu:19055%09red/mmu:19056%09red/mmu:19059%09red/mmu:19058%09red/mmu:93960%09red/mmu:23805%09red/mmu:24117%09red/mmu:108058%09red/mmu:22413…
cGMP-PKG signaling pathway	KEGG PATHWAY	mmu04022	137	173	5.85e-10	6.86e-09	105675|14679|14678|14677|53313|54195|14673|14672|11542|18019|11549|16370|18795|18796|18797|18798|26396|18386|110157|14674|494124|18160|72413|381290|67972|12062|60596|320707|210044|110893|12788|14463|11909|26413|19878|26417|19877|107589|18018|13618|13617|17258|17259|11607|12315|12313|100502876|11938|11937|11936|242202|11933|11932|11931|19059|12912|12915|333329|26427|11551|14682|19047|19046|19045|1…	http://www.genome.jp/kegg-bin/show_pathway?mmu04022/mmu:432530%09red/mmu:11539%09red/mmu:16370%09red/mmu:13618%09red/mmu:104111%09red/mmu:13617%09red/mmu:19055%09red/mmu:19056%09red/mmu:11928%09red/mmu:14677%09red/mmu:19059%09red/mmu:19058%09red/mmu:17260%09red/mmu:17261%09red/mmu:53313%09red/mmu:16367%09red/mmu:16369%09red/mmu:14886%09red/mmu:231991%09red/mmu:26396%09red/mmu:19046%09red/mmu:7333…
Dopaminergic synapse	KEGG PATHWAY	mmu04728	115	135	7.77e-10	8.44e-09	14679|14678|14677|56637|70405|17161|18795|18796|18797|16572|18798|13489|13488|52432|13162|494124|108058|29857|16574|26931|16573|26932|21770|13492|13491|226849|216869|214084|26416|71978|26414|26415|53623|26419|14695|14697|14696|14699|12315|12313|11865|12912|12915|26427|12846|26420|235542|14682|14683|19049|14681|19047|19046|19045|20265|14688|12323|12322|14281|224129|12325|110877|18749|16521|16522|1…	http://www.genome.jp/kegg-bin/show_pathway?mmu04728/mmu:17161%09red/mmu:235542%09red/mmu:12753%09red/mmu:13195%09red/mmu:59032%09red/mmu:18749%09red/mmu:19055%09red/mmu:19054%09red/mmu:19056%09red/mmu:19053%09red/mmu:19052%09red/mmu:14708%09red/mmu:224129%09red/mmu:14702%09red/mmu:14700%09red/mmu:14701%09red/mmu:14706%09red/mmu:14800%09red/mmu:14704%09red/mmu:14802%09red/mmu:52432%09red/mmu:10805…
FoxO signaling pathway	KEGG PATHWAY	mmu04068	115	135	7.77e-10	8.44e-09	74551|18099|20848|54601|73251|16370|12675|57436|16001|21812|19374|19373|11836|29857|18607|27373|13609|27401|328572|17246|18176|26413|252870|26416|26417|109880|26415|12581|26419|26558|170755|19079|26557|26556|241113|26396|110157|16150|105787|108079|268697|16653|19211|12914|20620|17873|26420|93759|12452|56458|11920|16153|12125|19651|16334|22035|16337|20528|66822|17128|18707|17126|17127|23797|12444|…	http://www.genome.jp/kegg-bin/show_pathway?mmu04068/mmu:18176%09red/mmu:241113%09red/mmu:16370%09red/mmu:170755%09red/mmu:12359%09red/mmu:12452%09red/mmu:20620%09red/mmu:17873%09red/mmu:11920%09red/mmu:16367%09red/mmu:16369%09red/mmu:26396%09red/mmu:13609%09red/mmu:12581%09red/mmu:328572%09red/mmu:15469%09red/mmu:19211%09red/mmu:15461%09red/mmu:67731%09red/mmu:252870%09red/mmu:18708%09red/mmu:148…
Adrenergic signaling in cardiomyocytes	KEGG PATHWAY	mmu04261	124	152	1.08e-09	1.13e-08	14679|14678|14677|20271|20272|11548|11549|18795|18796|18797|18798|56508|494124|108058|29857|381290|56808|67972|22003|26931|22004|26932|59310|320707|21770|210044|12300|235542|226849|26413|26416|26417|26415|17906|20191|59069|11607|12315|12313|11938|11936|11933|11932|11931|319734|81904|54652|12912|12915|12916|11652|26427|11909|14682|14683|12043|19047|19046|19045|11513|11512|11928|12322|21924|224129|…	http://www.genome.jp/kegg-bin/show_pathway?mmu04261/mmu:432530%09red/mmu:235542%09red/mmu:21924%09red/mmu:12296%09red/mmu:12297%09red/mmu:12294%09red/mmu:12295%09red/mmu:12293%09red/mmu:104111%09red/mmu:18749%09red/mmu:12298%09red/mmu:19054%09red/mmu:11928%09red/mmu:19053%09red/mmu:19052%09red/mmu:22004%09red/mmu:52432%09red/mmu:108058%09red/mmu:231991%09red/mmu:225849%09red/mmu:19046%09red/mmu:1…
Choline metabolism in cancer	KEGG PATHWAY	mmu05231	94	101	1.36e-09	1.37e-08	16476|22376|380921|19012|20517|110524|110157|227333|18777|74182|20519|20518|13685|18805|18806|18803|271844|217480|20683|242687|18176|320127|26413|26417|26414|26419|232889|12651|73178|54635|26396|22084|236899|19353|63993|19354|16653|26420|56517|14281|102238433|13139|83767|20520|18720|245880|18607|13026|100434|18590|18591|18596|72508|18595|23797|58988|18750|18751|18752|64930|104418|71785|68682|1478…	http://www.genome.jp/kegg-bin/show_pathway?mmu05231/mmu:13685%09red/mmu:74182%09red/mmu:380921%09red/mmu:170758%09red/mmu:236899%09red/mmu:15251%09red/mmu:20518%09red/mmu:20519%09red/mmu:242259%09red/mmu:67916%09red/mmu:245880%09red/mmu:20517%09red/mmu:18777%09red/mmu:26396%09red/mmu:54635%09red/mmu:19354%09red/mmu:19353%09red/mmu:15461%09red/mmu:56517%09red/mmu:23797%09red/mmu:22376%09red/mmu:20…
Thyroid hormone signaling pathway	KEGG PATHWAY	mmu04919	103	117	1.76e-09	1.72e-08	54720|18640|327987|20846|56637|20779|19014|12371|18796|18797|114875|18798|11465|11461|110157|58807|18802|18803|14463|12387|328572|17246|18176|433759|26413|16416|16410|20502|76199|15182|20182|56421|107585|26396|12159|11938|11936|329650|11933|11932|11931|18795|16653|21833|12914|21834|210789|22417|72472|20185|17979|17978|20181|17977|13982|11928|56458|18749|20525|68975|18607|15183|23797|12443|14534|1…	http://www.genome.jp/kegg-bin/show_pathway?mmu04919/mmu:13982%09red/mmu:18131%09red/mmu:20502%09red/mmu:23989%09red/mmu:433759%09red/mmu:18749%09red/mmu:11928%09red/mmu:17977%09red/mmu:17978%09red/mmu:17979%09red/mmu:15251%09red/mmu:22417%09red/mmu:26396%09red/mmu:328572%09red/mmu:11938%09red/mmu:11936%09red/mmu:20182%09red/mmu:20181%09red/mmu:68975%09red/mmu:11932%09red/mmu:11933%09red/mmu:20185…
Chemokine signaling pathway	KEGG PATHWAY	mmu04062	148	198	1.95e-09	1.84e-08	20848|12927|14678|12929|12928|15162|18762|20847|22376|56637|12774|12775|12776|12777|20779|12771|12772|12773|18795|18796|18797|14772|14773|12675|19395|18798|14677|20851|100862177|20846|215449|271849|210044|109905|19303|12145|320129|18479|18176|21844|216869|26413|19878|56838|26417|109880|20299|20297|20295|19877|14695|14697|14696|14191|14699|17096|110157|55985|19353|19354|57266|16653|277360|11514|11…	http://www.genome.jp/kegg-bin/show_pathway?mmu04062/mmu:432530%09red/mmu:109689%09red/mmu:21844%09red/mmu:19697%09red/mmu:330122%09red/mmu:104111%09red/mmu:26385%09red/mmu:18749%09red/mmu:14083%09red/mmu:23832%09red/mmu:12768%09red/mmu:19229%09red/mmu:14708%09red/mmu:20299%09red/mmu:14702%09red/mmu:20295%09red/mmu:14701%09red/mmu:14706%09red/mmu:14707%09red/mmu:14704%09red/mmu:19354%09red/mmu:193…
AMPK signaling pathway	KEGG PATHWAY	mmu04152	109	129	2.87e-09	2.63e-08	74551|72149|18640|18642|11549|16370|16846|16847|19016|19017|13631|17274|16001|30049|69008|14104|15357|26409|26931|13685|26932|21770|235542|226849|100705|71978|12428|56421|19079|241113|22084|22241|16890|105787|108079|12912|227154|14121|14120|26427|270198|93759|57915|56458|14936|100134861|16367|19052|16334|16337|20528|52432|12283|18607|73699|12638|72508|23797|12443|58988|74343|19053|19054|320207|16…	http://www.genome.jp/kegg-bin/show_pathway?mmu04152/mmu:13685%09red/mmu:17274%09red/mmu:235542%09red/mmu:241113%09red/mmu:16370%09red/mmu:59032%09red/mmu:19054%09red/mmu:19053%09red/mmu:19052%09red/mmu:100705%09red/mmu:26409%09red/mmu:52432%09red/mmu:16367%09red/mmu:170768%09red/mmu:16369%09red/mmu:231991%09red/mmu:59021%09red/mmu:225849%09red/mmu:12428%09red/mmu:16847%09red/mmu:16846%09red/mmu:6…
Phosphatidylinositol signaling system	KEGG PATHWAY	mmu04070	90	97	3.32e-09	2.95e-08	16330|76500|240752|114663|380921|18796|18797|114875|74302|18798|269180|110524|494124|227333|77116|19062|18802|18803|224020|320127|242291|17772|117150|55980|12315|12313|320404|225326|233011|18795|19211|16329|67073|107650|234515|27399|170749|217837|97287|53332|13139|104015|64436|16331|70405|18720|170835|16439|16438|212111|227399|320634|271424|18750|18751|18752|104418|110911|69718|54384|74055|110197…	http://www.genome.jp/kegg-bin/show_pathway?mmu04070/mmu:219135%09red/mmu:380921%09red/mmu:97287%09red/mmu:219024%09red/mmu:54384%09red/mmu:242291%09red/mmu:17772%09red/mmu:240752%09red/mmu:107650%09red/mmu:19211%09red/mmu:16440%09red/mmu:212111%09red/mmu:52858%09red/mmu:70405%09red/mmu:53332%09red/mmu:16331%09red/mmu:18707%09red/mmu:74055%09red/mmu:114875%09red/mmu:271424%09red/mmu:16438%09red/mm…
Transcriptional misregulation in cancer	KEGG PATHWAY	mmu05202	137	180	3.44e-09	2.96e-08	18647|15902|16185|140780|21908|268996|12775|231474|12524|19016|18791|18792|20375|15364|19401|21912|22029|15081|93735|17395|17283|107951|20683|64144|67603|17246|11908|68938|229593|19208|15446|433759|209446|53623|15182|12394|12395|12393|17095|18516|12151|14129|18612|14048|545192|80859|16480|15405|15242|17132|18109|16178|16409|12455|20185|20182|104156|20181|56458|11920|14030|20732|18053|319151|13876…	http://www.genome.jp/kegg-bin/show_pathway?mmu05202/mmu:14011%09red/mmu:13207%09red/mmu:18854%09red/mmu:19697%09red/mmu:19696%09red/mmu:64144%09red/mmu:14247%09red/mmu:12455%09red/mmu:18505%09red/mmu:433759%09red/mmu:18507%09red/mmu:18053%09red/mmu:14083%09red/mmu:66629%09red/mmu:11920%09red/mmu:15078%09red/mmu:17260%09red/mmu:14255%09red/mmu:17268%09red/mmu:209446%09red/mmu:15182%09red/mmu:67603…
Neurotrophin signaling pathway	KEGG PATHWAY	mmu04722	104	122	4.74e-09	3.93e-08	16476|12929|12928|56637|17164|70405|18053|12070|65020|12315|192662|20399|110157|327826|108058|29857|108960|26401|26400|26406|26408|12064|271849|18803|109905|67071|78405|18176|26413|26416|26417|109880|26415|26419|20111|20112|107746|26396|12313|19353|215449|16653|26420|19165|16179|22062|11350|12323|73914|12326|12325|16150|192656|14388|22034|22627|18607|18213|18212|19697|23797|16923|170936|18753|676…	http://www.genome.jp/kegg-bin/show_pathway?mmu04722/mmu:17164%09red/mmu:19697%09red/mmu:18212%09red/mmu:18213%09red/mmu:18053%09red/mmu:72843%09red/mmu:11857%09red/mmu:14388%09red/mmu:16367%09red/mmu:108058%09red/mmu:65020%09red/mmu:26396%09red/mmu:19353%09red/mmu:23921%09red/mmu:23939%09red/mmu:16179%09red/mmu:15461%09red/mmu:23797%09red/mmu:70405%09red/mmu:73914%09red/mmu:77480%09red/mmu:110651…
Ubiquitin mediated proteolysis	KEGG PATHWAY	mmu04120	117	145	4.82e-09	3.93e-08	69010|19823|76375|107568|59004|71991|83814|59008|15204|12402|231672|26374|63958|52206|66156|26401|12703|12702|56371|117146|56438|27401|17999|74153|17246|75788|268470|67923|56228|140499|242521|229615|50873|17222|99375|76980|66313|73318|56424|26554|74126|67673|68098|68729|17318|231380|50868|17237|70093|20437|246710|216080|20438|73998|109161|66894|28000|56459|22034|72584|67921|70790|50754|18854|1035…	http://www.genome.jp/kegg-bin/show_pathway?mmu04120/mmu:71991%09red/mmu:12211%09red/mmu:18854%09red/mmu:22200%09red/mmu:117146%09red/mmu:73998%09red/mmu:11634%09red/mmu:217342%09red/mmu:53323%09red/mmu:67673%09red/mmu:246710%09red/mmu:59026%09red/mmu:52206%09red/mmu:12189%09red/mmu:19823%09red/mmu:67921%09red/mmu:12234%09red/mmu:72584%09red/mmu:22215%09red/mmu:231380%09red/mmu:83814%09red/mmu:674…
Glutamatergic synapse	KEGG PATHWAY	mmu04724	99	115	7.81e-09	6.18e-08	14679|14678|14677|26557|18795|18796|18797|18798|110637|14660|20511|20510|20512|18805|18806|271844|210044|72961|67760|320129|16519|26413|26417|53623|14695|14697|14696|14699|26556|210274|13385|216456|108071|108072|108073|14682|14683|14681|11514|11513|11512|242443|224129|242607|18749|108068|329502|224997|16439|16438|19058|19059|102238433|19055|19056|18750|18751|18752|110355|140919|76257|14707|14706|…	http://www.genome.jp/kegg-bin/show_pathway?mmu04724/mmu:14645%09red/mmu:432530%09red/mmu:224997%09red/mmu:14688%09red/mmu:110637%09red/mmu:104111%09red/mmu:18749%09red/mmu:19055%09red/mmu:19056%09red/mmu:19059%09red/mmu:19058%09red/mmu:14708%09red/mmu:14809%09red/mmu:14702%09red/mmu:14700%09red/mmu:14806%09red/mmu:14706%09red/mmu:14800%09red/mmu:14704%09red/mmu:14802%09red/mmu:67760%09red/mmu:205…
Cell adhesion molecules (CAMs)	KEGG PATHWAY	mmu04514	132	176	1.22e-08	9.39e-08	54725|12483|12481|12487|110557|67374|19268|60363|15043|15042|12526|245537|13003|20969|71908|319504|19274|242122|18566|18007|272381|12738|14990|14991|15006|14998|269116|18417|20612|16415|16414|16410|16412|94332|12504|192167|15024|68481|66797|12525|216856|18189|12524|15529|18613|20340|20343|20344|20345|16401|60533|83964|16408|16409|15039|12519|320840|12511|12560|16019|16403|21947|15894|20737|18190|…	http://www.genome.jp/kegg-bin/show_pathway?mmu04514/mmu:14964%09red/mmu:67374%09red/mmu:18189%09red/mmu:19294%09red/mmu:12511%09red/mmu:14972%09red/mmu:12737%09red/mmu:12519%09red/mmu:20339%09red/mmu:54420%09red/mmu:320910%09red/mmu:58205%09red/mmu:69524%09red/mmu:224761%09red/mmu:83964%09red/mmu:53321%09red/mmu:14963%09red/mmu:14960%09red/mmu:14961%09red/mmu:12504%09red/mmu:14969%09red/mmu:12740…
Platelet activation	KEGG PATHWAY	mmu04611	102	123	1.74e-08	1.31e-07	14679|14678|14677|22371|18762|20779|108101|243816|18795|18796|18797|19395|18798|11465|20963|11461|54195|29857|14065|14062|60596|271844|210044|19419|109905|20619|99571|26413|19878|16416|26416|26417|26415|19877|232889|17096|70549|215449|14127|110135|12842|12843|14682|14683|19047|19046|19045|14724|11513|11512|224129|16398|18749|16439|16438|232906|23797|102238433|16801|18759|67653|20866|18127|109305|…	http://www.genome.jp/kegg-bin/show_pathway?mmu04611/mmu:432530%09red/mmu:104111%09red/mmu:70839%09red/mmu:19222%09red/mmu:19224%09red/mmu:21391%09red/mmu:18749%09red/mmu:99571%09red/mmu:12229%09red/mmu:20619%09red/mmu:110135%09red/mmu:19046%09red/mmu:19045%09red/mmu:434233%09red/mmu:60596%09red/mmu:16440%09red/mmu:26417%09red/mmu:23797%09red/mmu:210044%09red/mmu:22371%09red/mmu:11848%09red/mmu:11…
T cell receptor signaling pathway	KEGG PATHWAY	mmu04660	91	105	2.47e-08	1.81e-07	240354|16476|12487|18761|56637|18019|18018|12525|12526|12675|13383|18481|29857|18566|26400|26409|18803|19419|18479|18176|26413|26410|26416|26417|26415|12503|12502|12501|12500|12504|26396|110157|23797|16653|214230|26420|16818|17974|17973|21926|14281|16150|16151|16153|21947|18607|19697|19056|19058|19059|21682|19055|12567|67653|53859|54167|17444|12402|14784|16183|16428|15461|224105|12477|18037|18707…	http://www.genome.jp/kegg-bin/show_pathway?mmu04660/mmu:240354%09red/mmu:19697%09red/mmu:21926%09red/mmu:70584%09red/mmu:15170%09red/mmu:19055%09red/mmu:19056%09red/mmu:17974%09red/mmu:19059%09red/mmu:19058%09red/mmu:12502%09red/mmu:12503%09red/mmu:12500%09red/mmu:12501%09red/mmu:12504%09red/mmu:214230%09red/mmu:26396%09red/mmu:18479%09red/mmu:15461%09red/mmu:16428%09red/mmu:23797%09red/mmu:12402…
Lysosome	KEGG PATHWAY	mmu04142	101	124	3.77e-08	2.62e-07	110006|100862375|56325|18010|11781|67963|11984|27419|56722|12091|19156|15932|15931|56629|14667|432486|17159|19063|140494|14466|11778|11775|11777|11776|18173|18174|229445|11883|11881|11886|74008|27060|16541|13423|16784|74325|83429|11605|11768|11769|15586|20597|11766|11767|11764|11765|214505|19025|67464|27426|75612|252903|13038|13039|11593|13034|13036|192654|13030|13032|16889|14387|74105|106039|649…	http://www.genome.jp/kegg-bin/show_pathway?mmu04142/mmu:27419%09red/mmu:11432%09red/mmu:83429%09red/mmu:27029%09red/mmu:12752%09red/mmu:12751%09red/mmu:67963%09red/mmu:252903%09red/mmu:14387%09red/mmu:432486%09red/mmu:56464%09red/mmu:11984%09red/mmu:13034%09red/mmu:50917%09red/mmu:17775%09red/mmu:114128%09red/mmu:75612%09red/mmu:20597%09red/mmu:239739%09red/mmu:13030%09red/mmu:11777%09red/mmu:130…
Serotonergic synapse	KEGG PATHWAY	mmu04726	106	133	3.82e-08	2.62e-07	14679|14678|14677|11820|17161|18795|18796|18797|18798|76279|11836|16440|13099|271844|13097|232889|69888|242546|13095|18176|214084|26417|109880|14695|14697|14696|11689|11688|11684|11687|14699|13110|110157|216343|81906|54652|16653|14682|14683|14681|14688|224129|223864|110877|18749|16521|16522|16524|15557|15551|15550|15552|16439|16438|15559|15558|15566|102238433|12289|18750|18751|18752|56448|109731|…	http://www.genome.jp/kegg-bin/show_pathway?mmu04726/mmu:14401%09red/mmu:14400%09red/mmu:13110%09red/mmu:14402%09red/mmu:17161%09red/mmu:14688%09red/mmu:13195%09red/mmu:18749%09red/mmu:19224%09red/mmu:19225%09red/mmu:14708%09red/mmu:21990%09red/mmu:14702%09red/mmu:14700%09red/mmu:14701%09red/mmu:14706%09red/mmu:14707%09red/mmu:14704%09red/mmu:242546%09red/mmu:223706%09red/mmu:16440%09red/mmu:15461…
Retrograde endocannabinoid signaling	KEGG PATHWAY	mmu04723	89	103	3.84e-08	2.62e-07	14679|14678|14677|14073|18795|18796|18797|18798|14396|110886|29857|66082|210044|72961|26413|26416|26417|26414|26415|53623|26419|14695|14697|14696|14699|231871|54652|108071|23945|26420|269060|14682|14681|11514|14688|11512|116837|224129|18749|16521|16522|16524|16439|16438|18750|18751|18752|57249|14800|140919|14707|14706|14704|14702|14701|14700|242864|100043318|14708|14816|19225|216227|14799|66066|1…	http://www.genome.jp/kegg-bin/show_pathway?mmu04723/mmu:14401%09red/mmu:14394%09red/mmu:14397%09red/mmu:14396%09red/mmu:14405%09red/mmu:14404%09red/mmu:14407%09red/mmu:14406%09red/mmu:432530%09red/mmu:14408%09red/mmu:14403%09red/mmu:14402%09red/mmu:104111%09red/mmu:18749%09red/mmu:19225%09red/mmu:14708%09red/mmu:14702%09red/mmu:14700%09red/mmu:14701%09red/mmu:14706%09red/mmu:14800%09red/mmu:14704…
Melanogenesis	KEGG PATHWAY	mmu04916	86	99	5.48e-08	3.65e-07	14679|14678|14677|93897|56637|22173|22178|18795|18796|18797|18798|26396|110157|494124|108058|93735|210044|12387|328572|18176|13544|26413|22409|22408|13542|13543|13618|13614|17311|12315|12313|57265|16653|12912|12914|22418|22419|26427|22417|22414|22415|22412|22413|22410|22411|14682|14683|14681|11514|11513|11512|12323|12322|224129|12325|18749|70405|22416|22423|22422|22421|22420|18750|18751|18752|154…	http://www.genome.jp/kegg-bin/show_pathway?mmu04916/mmu:12313%09red/mmu:17311%09red/mmu:18749%09red/mmu:12912%09red/mmu:432530%09red/mmu:14682%09red/mmu:210044%09red/mmu:13542%09red/mmu:13544%09red/mmu:70405%09red/mmu:16590%09red/mmu:11512%09red/mmu:11513%09red/mmu:11514%09red/mmu:14366%09red/mmu:22409%09red/mmu:14367%09red/mmu:22413%09red/mmu:56637%09red/mmu:22416%09red/mmu:14368%09red/mmu:14369…
AGE-RAGE signaling pathway in diabetic complications	KEGG PATHWAY	mmu04933	88	103	6.45e-08	4.2e-07	16476|20848|94216|18762|20846|14268|18018|13367|18795|18796|18797|18798|29857|12828|12829|17390|12826|12827|11652|18802|18803|16176|16175|18176|26413|26416|26417|26414|26415|26419|14205|13614|11607|20850|20851|19353|16653|22340|12842|12843|26420|21926|11596|56458|15894|21824|19697|17128|17126|17127|23797|12443|20339|12567|18750|18751|18753|18754|74055|18127|15461|12576|13058|22339|18707|18706|320…	http://www.genome.jp/kegg-bin/show_pathway?mmu04933/mmu:19697%09red/mmu:21926%09red/mmu:20339%09red/mmu:13614%09red/mmu:12827%09red/mmu:12826%09red/mmu:12829%09red/mmu:12828%09red/mmu:94216%09red/mmu:19353%09red/mmu:16176%09red/mmu:16175%09red/mmu:13058%09red/mmu:15461%09red/mmu:23797%09red/mmu:18762%09red/mmu:56458%09red/mmu:18176%09red/mmu:16452%09red/mmu:22340%09red/mmu:18803%09red/mmu:18802%0…
Cytokine-cytokine receptor interaction	KEGG PATHWAY	mmu04060	174	265	6.63e-08	4.23e-07	16185|21947|12774|12775|12776|12777|12771|21941|12773|17000|12778|22035|16846|16847|16161|16160|16163|16162|16164|21934|16169|16168|18383|100504239|93672|14102|100862177|213208|22164|13607|17480|18053|13608|16172|16176|16177|12145|16175|16178|18414|15980|11479|16878|12772|140806|12985|12984|12983|12982|20299|20297|60504|20295|14205|230828|12977|17311|54635|237313|55985|12156|16326|16324|16323|161…	http://www.genome.jp/kegg-bin/show_pathway?mmu04060/mmu:23832%09red/mmu:100038993%09red/mmu:93672%09red/mmu:15976%09red/mmu:15975%09red/mmu:21813%09red/mmu:213208%09red/mmu:72049%09red/mmu:15979%09red/mmu:60505%09red/mmu:60504%09red/mmu:245527%09red/mmu:18053%09red/mmu:12804%09red/mmu:16878%09red/mmu:11480%09red/mmu:11481%09red/mmu:20299%09red/mmu:20297%09red/mmu:20295%09red/mmu:20315%09red/mmu:1…
Epstein-Barr virus infection	KEGG PATHWAY	mmu05169	157	232	7.29e-08	4.55e-07	110557|20848|54721|16476|54194|56637|245841|23997|22034|74414|21374|15043|15042|22627|21762|12675|103573|20375|19182|20963|19645|13000|227720|20602|29857|14990|26400|26939|229906|66354|26409|18708|15507|12534|14991|230073|18803|27401|19384|17999|328572|17246|16179|57296|433759|12902|69077|69870|252870|26416|26414|66491|12428|26419|54131|67065|15184|69241|15182|12505|14191|15024|26397|17096|19668|…	http://www.genome.jp/kegg-bin/show_pathway?mmu05169/mmu:18033%09red/mmu:12495%09red/mmu:237336%09red/mmu:21929%09red/mmu:19697%09red/mmu:20602%09red/mmu:71609%09red/mmu:19698%09red/mmu:70428%09red/mmu:19106%09red/mmu:433759%09red/mmu:18749%09red/mmu:12902%09red/mmu:20021%09red/mmu:20022%09red/mmu:19182%09red/mmu:15507%09red/mmu:224761%09red/mmu:14963%09red/mmu:208727%09red/mmu:14964%09red/mmu:125…
Endocrine resistance	KEGG PATHWAY	mmu01522	83	95	7.83e-08	4.78e-07	16476|26416|18707|18706|18176|20185|320207|12576|18709|18708|18710|56717|14083|26413|74769|20779|26417|109880|26415|16450|26419|12443|72508|18132|22059|19014|23797|15200|13982|11512|58988|216148|12567|18131|29857|19094|16000|16001|19645|110157|13388|224129|26420|26414|13983|242705|30955|11513|54485|11836|13866|14784|16653|20663|12043|16449|11514|15461|17390|20416|18128|17395|13649|14683|12578|125…	http://www.genome.jp/kegg-bin/show_pathway?mmu01522/mmu:18749%09red/mmu:12576%09red/mmu:12575%09red/mmu:432530%09red/mmu:210044%09red/mmu:224129%09red/mmu:216148%09red/mmu:54485%09red/mmu:13983%09red/mmu:11513%09red/mmu:11514%09red/mmu:14083%09red/mmu:18708%09red/mmu:20683%09red/mmu:18706%09red/mmu:320207%09red/mmu:18709%09red/mmu:13866%09red/mmu:56717%09red/mmu:26415%09red/mmu:26414%09red/mmu:26…
Hepatitis B	KEGG PATHWAY	mmu05161	111	146	1.03e-07	6.15e-07	16476|20849|20848|20847|20846|20779|11783|18019|18018|12370|12371|12675|19645|110957|20851|14102|26401|17395|230073|11652|117149|13557|13555|328572|228607|672195|18176|15530|26413|26417|26414|12428|26419|54131|26396|20850|110157|20852|26398|68576|16653|12912|19211|12914|12915|17874|26427|26420|11909|21926|14281|54411|16150|16151|142980|19697|17128|12448|23797|13205|12443|12567|12566|18750|18751|1…	http://www.genome.jp/kegg-bin/show_pathway?mmu05161/mmu:18033%09red/mmu:13205%09red/mmu:15975%09red/mmu:19697%09red/mmu:21926%09red/mmu:14082%09red/mmu:117149%09red/mmu:19229%09red/mmu:13063%09red/mmu:225471%09red/mmu:242705%09red/mmu:231991%09red/mmu:26396%09red/mmu:26398%09red/mmu:328572%09red/mmu:12428%09red/mmu:19211%09red/mmu:228607%09red/mmu:15461%09red/mmu:23797%09red/mmu:16193%09red/mmu:1…
Circadian entrainment	KEGG PATHWAY	mmu04713	84	98	1.15e-07	6.74e-07	239556|14799|16522|16524|58226|14678|14677|18798|19416|54195|26413|70405|14701|14688|18627|104111|53623|18796|66066|14695|14800|14697|14696|20191|12315|20192|12291|14699|18752|100043318|18750|18751|14802|14281|12313|224129|12912|16521|80796|16519|70729|11513|17773|18626|18795|16438|108058|432530|19091|19092|14707|14706|18797|14702|18125|14700|12325|16440|12288|12289|14708|494124|60596|14682|14683…	http://www.genome.jp/kegg-bin/show_pathway?mmu04713/mmu:12313%09red/mmu:14688%09red/mmu:244701%09red/mmu:12912%09red/mmu:432530%09red/mmu:14682%09red/mmu:210044%09red/mmu:224129%09red/mmu:14812%09red/mmu:14813%09red/mmu:14810%09red/mmu:14811%09red/mmu:11512%09red/mmu:11513%09red/mmu:70729%09red/mmu:11517%09red/mmu:14681%09red/mmu:19416%09red/mmu:14677%09red/mmu:26417%09red/mmu:12322%09red/mmu:142…
Toxoplasmosis	KEGG PATHWAY	mmu05145	92	113	1.5e-07	8.62e-07	105675|20848|54721|14679|14678|14677|20846|12774|12370|12371|12675|16412|16160|16779|16773|29857|12703|26409|11652|14998|17087|16179|15980|12265|672195|26413|26416|26417|26414|26415|26419|11689|16780|16782|26397|16145|26399|15482|17874|16403|26420|68652|12043|21926|16150|16151|16153|16154|16155|21947|22034|226519|18607|19697|15002|15001|15000|23797|320207|21939|14961|14960|14969|16835|14681|23928…	http://www.genome.jp/kegg-bin/show_pathway?mmu05145/mmu:16773%09red/mmu:16779%09red/mmu:17087%09red/mmu:19697%09red/mmu:21926%09red/mmu:15979%09red/mmu:16160%09red/mmu:16145%09red/mmu:17874%09red/mmu:14960%09red/mmu:14961%09red/mmu:14969%09red/mmu:26397%09red/mmu:26399%09red/mmu:16179%09red/mmu:15482%09red/mmu:23797%09red/mmu:54721%09red/mmu:23928%09red/mmu:66513%09red/mmu:16452%09red/mmu:16835%0…
ErbB signaling pathway	KEGG PATHWAY	mmu04012	77	87	1.59e-07	8.95e-07	16476|14388|18479|18706|18176|12929|12928|18709|18708|100042150|56717|56637|26413|74769|20779|26417|109880|18707|26419|13685|72508|23797|320207|15200|12402|58988|20663|13712|18750|18751|18752|26396|241656|110157|13874|30955|20850|13867|26398|26414|20851|18481|70584|13869|11350|11836|13866|108058|14784|16653|18183|208650|13645|14083|13649|214230|15461|20416|83961|26420|224105|271849|26400|17974|18…	http://www.genome.jp/kegg-bin/show_pathway?mmu04012/mmu:224105%09red/mmu:13685%09red/mmu:12576%09red/mmu:12575%09red/mmu:23797%09red/mmu:18709%09red/mmu:208650%09red/mmu:18183%09red/mmu:56637%09red/mmu:18708%09red/mmu:241656%09red/mmu:18706%09red/mmu:320207%09red/mmu:21802%09red/mmu:18481%09red/mmu:70584%09red/mmu:13866%09red/mmu:100042150%09red/mmu:26414%09red/mmu:26413%09red/mmu:13867%09red/mmu…
Purine metabolism	KEGG PATHWAY	mmu00230	127	179	2.03e-07	1.12e-06	14918|14919|54195|11821|29863|107569|53893|245841|59001|74414|67967|18950|231327|23917|27369|110639|22262|66566|18160|66401|229589|14917|66979|109674|60596|18969|18968|210044|94041|56248|108147|66763|229363|171567|75686|69870|66491|11564|11566|67065|69241|19076|23971|23972|18971|100862375|54611|14923|242202|50773|245650|64424|215446|66420|18588|67464|18103|18102|18583|18582|20021|11514|20022|1151…	http://www.genome.jp/kegg-bin/show_pathway?mmu00230/mmu:11821%09red/mmu:12495%09red/mmu:432530%09red/mmu:18582%09red/mmu:18583%09red/mmu:633979%09red/mmu:110639%09red/mmu:18588%09red/mmu:70428%09red/mmu:67967%09red/mmu:104111%09red/mmu:23984%09red/mmu:20135%09red/mmu:20133%09red/mmu:229589%09red/mmu:271639%09red/mmu:20022%09red/mmu:53893%09red/mmu:245650%09red/mmu:102216272%09red/mmu:11639%09red/…
Vascular smooth muscle contraction	KEGG PATHWAY	mmu04270	99	128	2.8e-07	1.52e-06	18761|54195|14673|14672|54598|11548|11549|18795|18796|18797|18798|12315|56089|110157|18778|14674|494124|18160|11836|72413|26361|60596|271844|210044|26565|11540|11475|329251|666168|26413|19878|26417|109880|17904|19877|232889|13617|11607|26396|12313|100502876|216459|54652|54140|14682|14683|19047|19046|19045|237625|11513|11512|224129|18749|70405|109624|16439|16438|232807|102238433|16801|18750|18751|…	http://www.genome.jp/kegg-bin/show_pathway?mmu04270/mmu:666168%09red/mmu:13117%09red/mmu:432530%09red/mmu:13118%09red/mmu:13119%09red/mmu:237625%09red/mmu:11607%09red/mmu:104111%09red/mmu:13617%09red/mmu:18749%09red/mmu:19222%09red/mmu:54140%09red/mmu:26396%09red/mmu:216459%09red/mmu:18778%09red/mmu:19046%09red/mmu:17904%09red/mmu:19045%09red/mmu:434233%09red/mmu:60596%09red/mmu:16440%09red/mmu:2…
Longevity regulating pathway	KEGG PATHWAY	mmu04211	81	96	2.98e-07	1.57e-06	19082|19079|20869|18706|18176|16337|320207|18709|18708|26427|56717|241113|75747|74769|18707|208647|18033|20656|104111|108099|16370|72508|22059|23797|19016|19017|16334|58988|29869|19697|12359|16000|64930|13685|68465|16001|72674|19744|22241|56458|30955|105787|108079|12421|231991|71742|18710|12912|16653|12915|56484|74370|22084|16367|224129|15461|51897|16369|77683|13684|230784|108097|11909|93759|2182…	http://www.genome.jp/kegg-bin/show_pathway?mmu04211/mmu:218268%09red/mmu:77683%09red/mmu:72674%09red/mmu:12912%09red/mmu:432530%09red/mmu:210044%09red/mmu:224129%09red/mmu:72993%09red/mmu:105787%09red/mmu:71742%09red/mmu:11512%09red/mmu:13685%09red/mmu:384783%09red/mmu:93759%09red/mmu:18708%09red/mmu:18709%09red/mmu:18706%09red/mmu:320207%09red/mmu:22241%09red/mmu:16334%09red/mmu:12359%09red/mmu:…
Leukocyte transendothelial migration	KEGG PATHWAY	mmu04670	95	121	3.01e-07	1.57e-06	12927|14678|67374|54354|60363|14679|16412|11465|14677|11461|11855|71908|29857|22165|17390|17395|59310|12388|18803|12385|12387|12386|109905|19303|18417|16415|16414|19878|26416|26415|19877|17906|19354|11474|56508|19353|21838|215449|18613|74734|16401|83964|16408|16409|17972|223864|15894|12738|12739|232906|12737|17969|12562|18752|18750|18751|54420|18260|242653|67653|18708|17356|16428|75677|67938|1274…	http://www.genome.jp/kegg-bin/show_pathway?mmu04670/mmu:67374%09red/mmu:54420%09red/mmu:14083%09red/mmu:17972%09red/mmu:19229%09red/mmu:69524%09red/mmu:11855%09red/mmu:83964%09red/mmu:12740%09red/mmu:12741%09red/mmu:19354%09red/mmu:19353%09red/mmu:18260%09red/mmu:17906%09red/mmu:13058%09red/mmu:60363%09red/mmu:16428%09red/mmu:242653%09red/mmu:11848%09red/mmu:12739%09red/mmu:12738%09red/mmu:58187%…
Morphine addiction	KEGG PATHWAY	mmu05032	79	93	3.44e-07	1.77e-06	16521|109689|320129|110886|16524|14679|110355|14677|242425|216869|11513|16522|13488|432530|104111|14397|14403|18583|66066|14695|18750|14697|14696|14772|14773|18751|241489|14678|14699|110385|18573|14394|14395|14396|18577|14704|23984|207728|16519|57249|54611|238871|29863|14707|14706|12286|12287|14702|14701|14700|218461|18752|100043318|14708|14688|11539|54393|14408|14683|14681|14404|210044|14406|144…	http://www.genome.jp/kegg-bin/show_pathway?mmu05032/mmu:14401%09red/mmu:14394%09red/mmu:14397%09red/mmu:14396%09red/mmu:14405%09red/mmu:14404%09red/mmu:14407%09red/mmu:14400%09red/mmu:432530%09red/mmu:14408%09red/mmu:210044%09red/mmu:224129%09red/mmu:207728%09red/mmu:14708%09red/mmu:109689%09red/mmu:11512%09red/mmu:11539%09red/mmu:11514%09red/mmu:242425%09red/mmu:18583%09red/mmu:14702%09red/mmu:1…
Insulin resistance	KEGG PATHWAY	mmu04931	89	111	3.74e-07	1.89e-06	74551|20848|18761|18762|56637|19017|19013|19268|208104|110651|12702|53412|14584|14583|26569|67071|100705|105651|244416|26414|26419|20111|20112|19079|241113|58805|105787|108079|12912|19211|210789|26427|110078|26420|19047|19046|19045|21926|56458|14936|100134861|16150|76055|16334|20525|20526|16337|20528|18607|19697|72508|23797|18751|58988|74343|320207|18753|18754|231991|18127|228966|108097|110854|10…	http://www.genome.jp/kegg-bin/show_pathway?mmu04931/mmu:241113%09red/mmu:19697%09red/mmu:21926%09red/mmu:100705%09red/mmu:16367%09red/mmu:231991%09red/mmu:19046%09red/mmu:19045%09red/mmu:19211%09red/mmu:26457%09red/mmu:74343%09red/mmu:12894%09red/mmu:12895%09red/mmu:23797%09red/mmu:18761%09red/mmu:16193%09red/mmu:56458%09red/mmu:19079%09red/mmu:110651%09red/mmu:20111%09red/mmu:208104%09red/mmu:22…
Cholinergic synapse	KEGG PATHWAY	mmu04725	90	113	3.95e-07	1.96e-06	14679|14678|14677|14672|18795|18796|18797|18798|108058|60613|12669|210044|18176|26413|26417|14695|14697|14696|14699|11441|11440|11444|110862|63993|54652|12912|16653|26427|14682|14681|11514|11513|11512|12323|12322|14281|224129|12326|12325|18749|16522|12671|16439|16438|18706|23797|211480|18750|18751|18752|14688|16536|16535|14707|14706|14704|14702|14701|14700|15461|108015|100043318|14708|226922|1143…	http://www.genome.jp/kegg-bin/show_pathway?mmu04725/mmu:11438%09red/mmu:432530%09red/mmu:211480%09red/mmu:104111%09red/mmu:18749%09red/mmu:14708%09red/mmu:14702%09red/mmu:14700%09red/mmu:14701%09red/mmu:14706%09red/mmu:14707%09red/mmu:14704%09red/mmu:108058%09red/mmu:110834%09red/mmu:231991%09red/mmu:60613%09red/mmu:16440%09red/mmu:15461%09red/mmu:23797%09red/mmu:210044%09red/mmu:11512%09red/mmu:…
Glycerophospholipid metabolism	KEGG PATHWAY	mmu00564	79	94	4.61e-07	2.23e-06	104759|68262|237625|241274|231510|329502|66826|14792|74182|13026|14712|14245|74451|55979|270084|66586|236899|232889|380921|227333|27388|19012|218121|14732|102238433|12651|333433|52123|14555|71760|26394|226856|225010|110911|67512|217480|19210|66358|26971|18618|18778|28042|75320|104418|99712|78390|110524|18777|320127|110197|18807|237928|320951|212862|67916|18781|52858|18805|18806|18780|77582|210992…	http://www.genome.jp/kegg-bin/show_pathway?mmu00564/mmu:231510%09red/mmu:78390%09red/mmu:102247%09red/mmu:270084%09red/mmu:50767%09red/mmu:331374%09red/mmu:14712%09red/mmu:14732%09red/mmu:380921%09red/mmu:237625%09red/mmu:192654%09red/mmu:67512%09red/mmu:225010%09red/mmu:13026%09red/mmu:52858%09red/mmu:241274%09red/mmu:66826%09red/mmu:71760%09red/mmu:104418%09red/mmu:66586%09red/mmu:212862%09red/…
HIF-1 signaling pathway	KEGG PATHWAY	mmu04066	88	110	4.63e-07	2.23e-06	20848|17000|15368|108058|13685|13684|11674|56438|18803|328572|112407|15980|26413|26417|13614|11863|18597|67673|26396|11601|11600|11602|21687|112406|13866|112405|12914|12323|12322|12325|16334|20525|16337|19697|67923|72508|23797|58988|26987|18752|18750|18751|16000|16001|433182|14254|13645|22041|22042|13807|13806|13649|170768|218268|15251|12576|12575|13058|22339|18707|18706|17346|17347|18709|18708|5…	http://www.genome.jp/kegg-bin/show_pathway?mmu04066/mmu:13684%09red/mmu:13685%09red/mmu:67673%09red/mmu:19697%09red/mmu:15979%09red/mmu:13866%09red/mmu:13614%09red/mmu:15251%09red/mmu:108058%09red/mmu:170768%09red/mmu:14254%09red/mmu:26396%09red/mmu:328572%09red/mmu:17000%09red/mmu:216019%09red/mmu:13058%09red/mmu:218268%09red/mmu:212032%09red/mmu:23797%09red/mmu:67923%09red/mmu:16193%09red/mmu:1…
Melanoma	KEGG PATHWAY	mmu05218	66	72	5.12e-07	2.42e-06	14174|14175|14176|12571|14170|18706|18176|14173|320207|18709|18708|14178|56636|26413|74769|14177|26417|109880|18707|18590|18591|18596|22059|18595|23797|14172|30955|54635|12567|14166|16000|16001|19645|110157|80903|71785|18710|242705|14171|11836|17342|64654|19211|16653|12550|13645|12443|15461|17295|26396|14167|80857|14165|14164|12578|67112|15234|14180|14182|13557|14169|13555|12575|13649|11652|17246	http://www.genome.jp/kegg-bin/show_pathway?mmu05218/mmu:14178%09red/mmu:12571%09red/mmu:320207%09red/mmu:12575%09red/mmu:23797%09red/mmu:14170%09red/mmu:14173%09red/mmu:14172%09red/mmu:14175%09red/mmu:12550%09red/mmu:14177%09red/mmu:14176%09red/mmu:80903%09red/mmu:14169%09red/mmu:18708%09red/mmu:18709%09red/mmu:18706%09red/mmu:18707%09red/mmu:14167%09red/mmu:26417%09red/mmu:26413%09red/mmu:14182%…
Viral carcinogenesis	KEGG PATHWAY	mmu05203	158	245	5.66e-07	2.63e-06	110557|20848|15451|15024|12774|15461|12776|20779|12771|12773|17000|21374|15043|15042|20963|19645|17096|110957|13383|14990|54123|83945|229906|66354|19696|12534|14991|15006|27401|20684|19650|328572|209357|17246|11909|12571|18176|433759|26413|252870|26417|12428|54131|15184|15185|15182|15183|18970|11474|58801|19303|20850|20851|19668|19664|19353|12370|105782|12914|12912|16653|320332|22029|12915|26427|…	http://www.genome.jp/kegg-bin/show_pathway?mmu05203/mmu:18033%09red/mmu:237336%09red/mmu:13205%09red/mmu:14972%09red/mmu:19697%09red/mmu:19696%09red/mmu:71609%09red/mmu:319190%09red/mmu:19106%09red/mmu:433759%09red/mmu:18749%09red/mmu:224761%09red/mmu:14963%09red/mmu:208727%09red/mmu:14964%09red/mmu:319186%09red/mmu:319184%09red/mmu:319180%09red/mmu:14885%09red/mmu:14884%09red/mmu:231991%09red/mm…
GnRH signaling pathway	KEGG PATHWAY	mmu04912	75	88	6.17e-07	2.79e-06	16476|70405|26396|18176|329502|12540|14672|26413|20779|26417|26414|26415|104111|16439|26419|17387|232889|18795|18796|18797|80796|15200|16438|11512|102238433|13712|18798|23939|18750|18751|26397|12315|12313|26399|108058|110157|18753|494124|54652|19094|29857|78390|14784|16653|20663|26401|26400|26405|26407|26406|15461|17390|16440|12288|12289|13649|26420|18805|18806|14682|14683|271844|210044|11513|263…	http://www.genome.jp/kegg-bin/show_pathway?mmu04912/mmu:12313%09red/mmu:14672%09red/mmu:78390%09red/mmu:432530%09red/mmu:14682%09red/mmu:210044%09red/mmu:224129%09red/mmu:14715%09red/mmu:70405%09red/mmu:11512%09red/mmu:11513%09red/mmu:11514%09red/mmu:494124%09red/mmu:26417%09red/mmu:18753%09red/mmu:26415%09red/mmu:26414%09red/mmu:26413%09red/mmu:19094%09red/mmu:232889%09red/mmu:104111%09red/mmu:1…
Protein processing in endoplasmic reticulum	KEGG PATHWAY	mmu04141	118	167	6.19e-07	2.79e-06	22030|70361|54197|15519|116891|66256|66861|73318|77371|71853|56812|81489|13002|56085|63958|107513|217365|66397|26400|17156|17155|15502|26408|13418|15505|105245|56438|231098|67475|18415|50762|216197|56228|140499|103963|94232|50873|53421|26414|66967|22393|26419|64209|12018|81500|56424|270669|74126|15482|193670|320011|14828|72265|19359|19358|78943|14827|12915|67819|110379|244178|223455|26420|67397|2…	http://www.genome.jp/kegg-bin/show_pathway?mmu04141/mmu:240667%09red/mmu:71853%09red/mmu:13200%09red/mmu:226641%09red/mmu:100037258%09red/mmu:67475%09red/mmu:69276%09red/mmu:19106%09red/mmu:50762%09red/mmu:20334%09red/mmu:20335%09red/mmu:78943%09red/mmu:105245%09red/mmu:320011%09red/mmu:66967%09red/mmu:103963%09red/mmu:23802%09red/mmu:213539%09red/mmu:19358%09red/mmu:19359%09red/mmu:22393%09red/m…
Apoptosis	KEGG PATHWAY	mmu04210	103	139	6.72e-07	2.98e-06	18646|16476|13368|11545|18952|12371|12675|11465|11461|14102|26408|238463|64704|672195|18176|11783|229445|26413|12984|12983|26417|26414|26419|12018|58801|26396|110157|16150|12370|20740|16653|78943|22029|17873|22145|22143|57913|21926|14281|13038|328417|11920|16151|13036|12122|13030|13032|22030|22035|20739|18607|19697|12633|16439|16438|16440|23797|170770|53857|21933|19766|26420|12333|64138|12364|154…	http://www.genome.jp/kegg-bin/show_pathway?mmu04210/mmu:19697%09red/mmu:71609%09red/mmu:21926%09red/mmu:238463%09red/mmu:69601%09red/mmu:14082%09red/mmu:78943%09red/mmu:17873%09red/mmu:11920%09red/mmu:12122%09red/mmu:26396%09red/mmu:19766%09red/mmu:16440%09red/mmu:15461%09red/mmu:22145%09red/mmu:13032%09red/mmu:17210%09red/mmu:13036%09red/mmu:23797%09red/mmu:12125%09red/mmu:12333%09red/mmu:12123%…
TNF signaling pathway	KEGG PATHWAY	mmu04668	88	112	7.85e-07	3.43e-06	16477|16476|72542|12370|12675|16168|14102|29857|26400|12702|26409|26408|17395|16878|16176|11909|26413|26410|26416|26417|26414|26415|74006|20297|26419|17387|67384|13614|26397|432555|26399|26398|12912|12915|22029|26427|26420|68652|21926|14281|16396|16150|16151|21929|22030|22031|15894|66724|15945|19697|12633|23797|20339|66513|19766|21938|53859|231991|74568|73086|12977|19225|78284|69601|18707|18706|3…	http://www.genome.jp/kegg-bin/show_pathway?mmu04668/mmu:21929%09red/mmu:19697%09red/mmu:71609%09red/mmu:21926%09red/mmu:17387%09red/mmu:13614%09red/mmu:69601%09red/mmu:14082%09red/mmu:19225%09red/mmu:16878%09red/mmu:20297%09red/mmu:15945%09red/mmu:231991%09red/mmu:26397%09red/mmu:26398%09red/mmu:26399%09red/mmu:16176%09red/mmu:19766%09red/mmu:23797%09red/mmu:16193%09red/mmu:432555%09red/mmu:12633…
Oocyte meiosis	KEGG PATHWAY	mmu04114	90	116	8.61e-07	3.71e-06	69010|70405|59008|30939|114875|19056|56150|52206|494124|66156|67579|108058|11835|110651|330228|72415|26931|26932|12534|12532|21770|56438|210044|67071|226849|18667|17222|26413|26417|20111|20112|140557|67141|29857|12315|12313|19047|19046|19045|11513|11512|12323|12322|224129|12325|18749|12877|105988|16334|22627|22629|22628|73699|12448|16439|16438|19058|19059|231207|19052|19053|19055|103583|12566|122…	http://www.genome.jp/kegg-bin/show_pathway?mmu04114/mmu:432530%09red/mmu:18667%09red/mmu:140557%09red/mmu:104111%09red/mmu:18749%09red/mmu:19055%09red/mmu:19056%09red/mmu:19053%09red/mmu:19052%09red/mmu:19059%09red/mmu:19058%09red/mmu:108058%09red/mmu:52206%09red/mmu:231207%09red/mmu:225849%09red/mmu:19046%09red/mmu:19045%09red/mmu:434233%09red/mmu:67579%09red/mmu:16440%09red/mmu:105988%09red/mmu…
Hypertrophic cardiomyopathy (HCM)	KEGG PATHWAY	mmu05410	72	84	8.86e-07	3.76e-06	19082|24051|16400|241113|59069|16412|56808|54376|54377|24053|16416|13405|16410|108099|20541|109700|20391|12294|16419|17906|16193|319480|17868|20191|16905|12293|16420|19079|12297|12296|12295|12289|11465|16000|21924|11461|241226|192897|11938|11421|319734|105787|81904|108079|54652|16773|320910|24052|12298|16402|16403|13726|16401|22003|104099|12288|22004|108097|59310|326618|22138|16404|17897|21926|21…	http://www.genome.jp/kegg-bin/show_pathway?mmu05410/mmu:108099%09red/mmu:16773%09red/mmu:56808%09red/mmu:22138%09red/mmu:12289%09red/mmu:16404%09red/mmu:16403%09red/mmu:16402%09red/mmu:16401%09red/mmu:16400%09red/mmu:319734%09red/mmu:21808%09red/mmu:20541%09red/mmu:17897%09red/mmu:22004%09red/mmu:16193%09red/mmu:21926%09red/mmu:21803%09red/mmu:21924%09red/mmu:12296%09red/mmu:12297%09red/mmu:19079…
Herpes simplex infection	KEGG PATHWAY	mmu05168	146	224	9.64e-07	4.04e-06	53319|110557|54721|16476|15161|20847|20846|21374|15043|15042|110809|12675|16160|67996|13000|16168|14102|21343|14990|22029|12702|26409|230073|12534|14991|170722|407786|19697|23961|23960|14998|27401|20684|231805|328572|16176|12261|15980|68077|672195|21354|18988|252870|26414|26419|54131|15024|667373|226182|16150|12370|12914|15957|17874|15139|228980|12995|26420|68652|15039|19047|80509|19045|58235|219…	http://www.genome.jp/kegg-bin/show_pathway?mmu05168/mmu:228980%09red/mmu:19294%09red/mmu:237336%09red/mmu:15976%09red/mmu:18854%09red/mmu:15975%09red/mmu:19697%09red/mmu:407786%09red/mmu:12753%09red/mmu:21926%09red/mmu:15979%09red/mmu:225895%09red/mmu:19106%09red/mmu:14082%09red/mmu:21354%09red/mmu:54131%09red/mmu:13063%09red/mmu:224761%09red/mmu:18988%09red/mmu:14963%09red/mmu:14960%09red/mmu:14…
Inflammatory mediator regulation of TRP channels	KEGG PATHWAY	mmu04750	95	126	1.05e-06	4.34e-06	18761|20779|18795|18796|18797|13117|18798|494124|108058|29857|12061|12062|14063|13099|271844|13097|13095|69888|16177|210044|242546|666168|26416|26414|26415|26419|232889|11684|26397|12315|12313|16176|26399|19219|19217|193034|26420|14682|14683|19047|19046|19045|18803|11513|11512|12323|12322|224129|12325|18749|70405|16439|16438|15559|15558|102238433|18752|18750|18751|16000|18753|18754|18755|171382|1…	http://www.genome.jp/kegg-bin/show_pathway?mmu04750/mmu:13110%09red/mmu:666168%09red/mmu:13117%09red/mmu:432530%09red/mmu:13118%09red/mmu:13119%09red/mmu:63873%09red/mmu:104111%09red/mmu:18749%09red/mmu:246788%09red/mmu:18706%09red/mmu:193034%09red/mmu:242546%09red/mmu:108058%09red/mmu:171382%09red/mmu:26399%09red/mmu:26397%09red/mmu:19046%09red/mmu:19045%09red/mmu:16177%09red/mmu:16176%09red/mmu…
Pancreatic cancer	KEGG PATHWAY	mmu05212	61	66	1.13e-06	4.6e-06	242705|20848|18707|18706|19361|320207|18709|18708|19730|23797|26413|17128|26417|109880|12540|12190|26419|17126|17127|22059|12371|18033|12443|12675|30955|170758|12567|21813|110157|19765|19645|16150|26414|21812|19353|73341|19354|11836|13866|18710|56044|20846|21808|13645|21809|12048|13649|26420|18805|12578|19697|12571|13557|74769|13555|64143|21802|21803|22339|11652|16151	http://www.genome.jp/kegg-bin/show_pathway?mmu05212/mmu:12571%09red/mmu:12048%09red/mmu:12578%09red/mmu:23797%09red/mmu:18709%09red/mmu:18033%09red/mmu:22339%09red/mmu:12371%09red/mmu:21808%09red/mmu:19697%09red/mmu:170758%09red/mmu:18708%09red/mmu:56044%09red/mmu:18706%09red/mmu:12675%09red/mmu:21803%09red/mmu:21802%09red/mmu:64143%09red/mmu:13866%09red/mmu:19361%09red/mmu:26414%09red/mmu:26413%…
Chronic myeloid leukemia	KEGG PATHWAY	mmu05220	65	73	1.22e-06	4.91e-06	19247|21809|18707|18706|18176|12929|12928|18709|18708|14013|14389|26413|17128|20850|20663|26417|109880|20416|17127|22059|23797|15182|12443|12675|12402|30955|12394|12567|21808|320207|26396|21813|110157|433759|19645|12571|18033|21812|242705|11836|18710|110279|14784|16653|208650|11652|16151|15461|12048|12578|271849|19697|20851|11350|13557|74769|13555|12575|13016|13017|21803|16150|17246|12576|216148	http://www.genome.jp/kegg-bin/show_pathway?mmu05220/mmu:13017%09red/mmu:13016%09red/mmu:12571%09red/mmu:12048%09red/mmu:14013%09red/mmu:12575%09red/mmu:20850%09red/mmu:23797%09red/mmu:14389%09red/mmu:18709%09red/mmu:15182%09red/mmu:21809%09red/mmu:21808%09red/mmu:208650%09red/mmu:19697%09red/mmu:18708%09red/mmu:21813%09red/mmu:18706%09red/mmu:12675%09red/mmu:21803%09red/mmu:18033%09red/mmu:12576%…
Renal cell carcinoma	KEGG PATHWAY	mmu05211	62	68	1.26e-06	4.98e-06	16476|19247|14388|18479|20525|18176|12929|12928|18709|12540|18710|26413|74769|70584|20663|26417|109880|13819|18707|18591|18706|23797|320207|107746|21802|11863|14194|11836|67673|328572|241656|110157|112407|19353|18481|112405|67923|215449|22346|16653|14784|12914|23871|71745|11652|214230|15461|17295|26396|112406|18708|224105|56438|15234|15251|109905|21803|11864|22339|30955|21808|21809	http://www.genome.jp/kegg-bin/show_pathway?mmu05211/mmu:224105%09red/mmu:320207%09red/mmu:215449%09red/mmu:18708%09red/mmu:23871%09red/mmu:23797%09red/mmu:67923%09red/mmu:67673%09red/mmu:21809%09red/mmu:21808%09red/mmu:71745%09red/mmu:241656%09red/mmu:18706%09red/mmu:18707%09red/mmu:21803%09red/mmu:21802%09red/mmu:18481%09red/mmu:214230%09red/mmu:26417%09red/mmu:30955%09red/mmu:109880%09red/mmu:1…
Prostate cancer	KEGG PATHWAY	mmu05215	74	89	1.37e-06	5.31e-06	16334|18706|18176|320207|12576|18709|18708|18710|56717|18095|15519|26427|74769|20663|208647|109880|18707|18590|18591|18596|23797|22059|18595|12371|12443|12675|30955|18033|19697|54635|12448|12566|16000|16001|19645|110157|13866|71785|16150|242705|14784|231991|11836|12914|12912|11835|16653|18607|12043|13645|56637|26413|16151|15461|26396|13649|23920|21416|21415|21414|14183|14182|13557|13555|12575|218…	http://www.genome.jp/kegg-bin/show_pathway?mmu05215/mmu:320207%09red/mmu:18595%09red/mmu:12575%09red/mmu:12912%09red/mmu:12043%09red/mmu:12443%09red/mmu:18033%09red/mmu:12371%09red/mmu:18707%09red/mmu:19697%09red/mmu:18708%09red/mmu:18709%09red/mmu:18706%09red/mmu:12675%09red/mmu:18596%09red/mmu:21802%09red/mmu:16334%09red/mmu:12576%09red/mmu:56458%09red/mmu:56717%09red/mmu:26413%09red/mmu:14182%…
EGFR tyrosine kinase inhibitor resistance	KEGG PATHWAY	mmu01521	70	82	1.38e-06	5.31e-06	20848|18707|18706|18176|14173|320207|18709|18708|100042150|56717|56637|26413|74769|14388|20779|26417|18015|16194|16542|18590|18591|20416|72508|16193|18595|23797|16452|26396|58988|20663|26987|54635|18750|18751|16000|16001|110157|13684|71785|13867|18710|19211|18596|11836|13866|14784|16653|109880|12043|13645|13649|56484|15461|17295|26362|13685|218268|271849|18803|15234|14183|18752|14184|12048|21802|…	http://www.genome.jp/kegg-bin/show_pathway?mmu01521/mmu:218268%09red/mmu:12048%09red/mmu:56484%09red/mmu:15234%09red/mmu:12043%09red/mmu:12125%09red/mmu:14173%09red/mmu:26987%09red/mmu:26362%09red/mmu:13685%09red/mmu:18708%09red/mmu:18709%09red/mmu:18706%09red/mmu:320207%09red/mmu:16193%09red/mmu:21802%09red/mmu:16194%09red/mmu:14184%09red/mmu:100042150%09red/mmu:109880%09red/mmu:26413%09red/mmu:…
Estrogen signaling pathway	KEGG PATHWAY	mmu04915	79	98	1.42e-06	5.39e-06	16521|16476|16522|18707|18706|18176|14678|320207|14229|18709|18708|18710|242425|15519|15461|74769|70405|20779|208647|26396|16439|11512|18753|16524|23797|18796|18797|15200|13982|30955|216148|18798|18795|14677|12315|12313|224129|110157|16519|494124|231991|16438|15482|12912|14784|16653|12915|20663|11652|76854|18127|11514|26427|17390|20416|17395|13649|14683|16440|80796|54393|14682|271849|26413|210044…	http://www.genome.jp/kegg-bin/show_pathway?mmu04915/mmu:12313%09red/mmu:18749%09red/mmu:18708%09red/mmu:14816%09red/mmu:14682%09red/mmu:210044%09red/mmu:224129%09red/mmu:70405%09red/mmu:13983%09red/mmu:11513%09red/mmu:11514%09red/mmu:18798%09red/mmu:242425%09red/mmu:20683%09red/mmu:18706%09red/mmu:320207%09red/mmu:12912%09red/mmu:26417%09red/mmu:30955%09red/mmu:26413%09red/mmu:104111%09red/mmu:18…
Tight junction	KEGG PATHWAY	mmu04530	102	141	1.63e-06	6.14e-06	58220|77579|14678|67374|18762|17475|20779|60363|14679|17883|11465|50791|11461|13000|65964|71908|93737|59310|12385|12387|12386|11474|71774|18417|75723|18176|71978|17906|16897|99470|68328|14924|17532|20742|16653|19211|56217|12995|27428|83964|71960|69908|110380|52432|12738|12739|73699|20130|12737|23797|20336|18761|19052|19053|93742|18752|12567|18750|18751|54420|18753|18754|18755|14677|18260|18759|13…	http://www.genome.jp/kegg-bin/show_pathway?mmu04530/mmu:67374%09red/mmu:50791%09red/mmu:12695%09red/mmu:71774%09red/mmu:54420%09red/mmu:20130%09red/mmu:72058%09red/mmu:19053%09red/mmu:19052%09red/mmu:77579%09red/mmu:83964%09red/mmu:75723%09red/mmu:99470%09red/mmu:52432%09red/mmu:12740%09red/mmu:12741%09red/mmu:70737%09red/mmu:56217%09red/mmu:17906%09red/mmu:19211%09red/mmu:60363%09red/mmu:15461%0…
Influenza A	KEGG PATHWAY	mmu05164	118	172	1.75e-06	6.49e-06	53319|16476|54721|66679|54196|20847|20846|18550|67373|22072|77125|12371|11465|16160|81489|11461|14102|237082|214523|29857|54123|26400|12702|56637|16647|18708|230073|170722|103573|23961|23960|14998|328572|16176|16175|228607|15980|12265|672195|214531|269966|26413|26416|26417|26414|26415|26419|54131|26397|26396|110157|26399|26398|15482|12914|17874|26420|11909|21926|16391|270151|16019|142980|15894|22…	http://www.genome.jp/kegg-bin/show_pathway?mmu05164/mmu:217069%09red/mmu:67373%09red/mmu:18033%09red/mmu:15976%09red/mmu:100037258%09red/mmu:15975%09red/mmu:19697%09red/mmu:21926%09red/mmu:15979%09red/mmu:19106%09red/mmu:66679%09red/mmu:13063%09red/mmu:15945%09red/mmu:14960%09red/mmu:14961%09red/mmu:14969%09red/mmu:26396%09red/mmu:269966%09red/mmu:26398%09red/mmu:26399%09red/mmu:26397%09red/mmu:3…
Dilated cardiomyopathy	KEGG PATHWAY	mmu05414	74	90	1.82e-06	6.67e-06	16403|24051|16400|140723|59069|20541|326618|54376|54377|24053|16416|13405|16410|432530|104111|109700|20391|12294|16419|17906|319480|17868|20191|16905|12293|16420|12297|12296|12295|12289|11465|16000|21924|11461|241226|192897|11938|319734|81904|54652|16773|320910|24052|12298|16402|11554|13726|16401|11512|22003|104099|12288|22004|59310|14683|22138|210044|16404|11513|17897|16412|21926|21803|224129|12…	http://www.genome.jp/kegg-bin/show_pathway?mmu05414/mmu:16773%09red/mmu:56808%09red/mmu:432530%09red/mmu:12289%09red/mmu:210044%09red/mmu:224129%09red/mmu:16403%09red/mmu:16402%09red/mmu:16401%09red/mmu:16400%09red/mmu:319734%09red/mmu:21808%09red/mmu:20541%09red/mmu:11513%09red/mmu:17897%09red/mmu:11512%09red/mmu:22004%09red/mmu:21803%09red/mmu:21926%09red/mmu:320910%09red/mmu:12296%09red/mmu:12…
Bacterial invasion of epithelial cells	KEGG PATHWAY	mmu05100	67	78	1.98e-06	7.09e-06	14388|18707|18706|12927|78514|103967|12928|12488|18708|22376|140579|52398|242687|14268|13429|12540|622434|56378|320207|74325|12402|30955|216148|16412|12390|12391|11465|12929|53860|11461|67771|13043|56526|67653|74192|18709|19353|16202|56212|54204|11848|18710|12550|208650|234683|14083|16402|17295|20416|18000|24050|12389|271849|20362|12387|12386|330662|12385|74769|19303|140580|11867|73178|20779|6808…	http://www.genome.jp/kegg-bin/show_pathway?mmu05100/mmu:12929%09red/mmu:18708%09red/mmu:22330%09red/mmu:68089%09red/mmu:18709%09red/mmu:22376%09red/mmu:12550%09red/mmu:11848%09red/mmu:83767%09red/mmu:73178%09red/mmu:67771%09red/mmu:67653%09red/mmu:208650%09red/mmu:12385%09red/mmu:18706%09red/mmu:18707%09red/mmu:12391%09red/mmu:12390%09red/mmu:74325%09red/mmu:16202%09red/mmu:14268%09red/mmu:56378%…
TGF-beta signaling pathway	KEGG PATHWAY	mmu04350	71	85	1.98e-06	7.09e-06	12166|228839|17965|15902|15903|15901|320202|21781|21825|26413|17128|73699|68010|26417|17126|72508|11481|11480|66313|269275|21926|58988|19052|26965|12167|17127|21815|328572|21813|21812|12156|18119|67653|12159|17125|16326|16324|16323|110542|230597|11848|12914|104394|218441|18121|14563|51792|19053|17131|17129|14313|15904|242316|56438|12667|20683|13590|19877|13179|12164|19650|21803|12161|55994|18741|…	http://www.genome.jp/kegg-bin/show_pathway?mmu04350/mmu:230597%09red/mmu:73699%09red/mmu:11479%09red/mmu:12667%09red/mmu:12167%09red/mmu:11848%09red/mmu:21809%09red/mmu:21808%09red/mmu:12162%09red/mmu:12164%09red/mmu:12161%09red/mmu:12166%09red/mmu:16323%09red/mmu:12168%09red/mmu:21803%09red/mmu:21926%09red/mmu:21825%09red/mmu:26417%09red/mmu:55994%09red/mmu:18741%09red/mmu:26413%09red/mmu:56438%…
GABAergic synapse	KEGG PATHWAY	mmu04727	73	89	2.26e-06	7.98e-06	227120|16522|66066|14679|14678|14677|18195|242425|11513|20779|14688|104111|209837|14403|57138|14695|18750|14697|14696|14417|14415|18751|70827|14699|110886|100043318|14394|14395|14396|14397|57436|54652|105727|57249|18752|268860|268566|14645|14660|432530|56486|76257|14707|14706|12286|12287|14702|14701|14700|15114|12288|12289|14708|216456|54393|14408|14681|14404|210044|14406|14407|14400|14401|14402|…	http://www.genome.jp/kegg-bin/show_pathway?mmu04727/mmu:14401%09red/mmu:14394%09red/mmu:14397%09red/mmu:14396%09red/mmu:14405%09red/mmu:14404%09red/mmu:14407%09red/mmu:14400%09red/mmu:432530%09red/mmu:14408%09red/mmu:210044%09red/mmu:224129%09red/mmu:14645%09red/mmu:11512%09red/mmu:14402%09red/mmu:11514%09red/mmu:242425%09red/mmu:54652%09red/mmu:14681%09red/mmu:232333%09red/mmu:14417%09red/mmu:21…
Hepatitis C	KEGG PATHWAY	mmu05160	99	137	2.38e-06	8.24e-06	20848|54721|20847|20846|56637|20778|60363|12520|19013|12675|242653|15467|71908|11836|29857|54123|12702|230073|12739|23961|23960|18417|228607|18176|26413|26416|26417|109880|26415|26419|54131|110157|667373|19192|16653|15957|26420|20181|21926|16391|16150|16151|246728|22030|22031|142980|22034|52432|18607|12738|19697|73699|12737|23797|19052|19053|54420|19766|18260|26414|18708|246730|14784|13645|15461|…	http://www.genome.jp/kegg-bin/show_pathway?mmu05160/mmu:16391%09red/mmu:15976%09red/mmu:15975%09red/mmu:19697%09red/mmu:71609%09red/mmu:21926%09red/mmu:54131%09red/mmu:19106%09red/mmu:54420%09red/mmu:19053%09red/mmu:19052%09red/mmu:52432%09red/mmu:16362%09red/mmu:12740%09red/mmu:12741%09red/mmu:18260%09red/mmu:228607%09red/mmu:19766%09red/mmu:20181%09red/mmu:15467%09red/mmu:60363%09red/mmu:15461%…
Inositol phosphate metabolism	KEGG PATHWAY	mmu00562	62	70	2.39e-06	8.24e-06	64436|16331|18707|18720|18705|18704|240752|242291|74769|170835|114663|18718|269437|18706|212111|18795|18796|18797|114875|108083|52858|30955|18798|16330|117150|55980|269180|104776|225326|69718|54384|320404|71780|17330|233011|19211|74055|18719|269615|18717|18711|16329|84095|224020|75678|219135|17772|77116|320634|19062|234515|107650|18802|18803|170749|217837|74302|97287|20975|53332|67073|104015	http://www.genome.jp/kegg-bin/show_pathway?mmu00562/mmu:219135%09red/mmu:74302%09red/mmu:52858%09red/mmu:17330%09red/mmu:53332%09red/mmu:18706%09red/mmu:18720%09red/mmu:19062%09red/mmu:233011%09red/mmu:16331%09red/mmu:16330%09red/mmu:18704%09red/mmu:18705%09red/mmu:18717%09red/mmu:67073%09red/mmu:20975%09red/mmu:18795%09red/mmu:54384%09red/mmu:320634%09red/mmu:170835%09red/mmu:104776%09red/mmu:11…
Glioma	KEGG PATHWAY	mmu05214	59	65	2.47e-06	8.4e-06	70405|18707|18706|18176|320207|18709|18708|56717|26413|74769|20663|26417|109880|26396|18590|18591|18596|22059|23797|12315|30955|216148|18752|12567|18750|18751|16000|16001|19645|110157|18595|12313|242705|19211|494124|11836|18710|108058|14784|16653|13645|15461|20416|13649|12443|12578|271849|18803|12571|13557|13555|12575|12323|12322|21802|12325|11652|17246|80796	http://www.genome.jp/kegg-bin/show_pathway?mmu05214/mmu:12313%09red/mmu:12571%09red/mmu:320207%09red/mmu:12575%09red/mmu:23797%09red/mmu:16000%09red/mmu:12578%09red/mmu:70405%09red/mmu:18708%09red/mmu:18709%09red/mmu:18706%09red/mmu:18707%09red/mmu:18596%09red/mmu:21802%09red/mmu:26417%09red/mmu:12322%09red/mmu:26413%09red/mmu:18176%09red/mmu:56717%09red/mmu:14784%09red/mmu:109880%09red/mmu:20663…
Chagas disease (American trypanosomiasis)	KEGG PATHWAY	mmu05142	81	104	2.66e-06	8.94e-06	16476|21809|22034|18706|14679|14678|320207|14676|18709|18708|14672|26413|12633|73699|26416|26417|26414|26415|18707|26419|17126|17127|16193|12503|23797|18796|12500|12502|21899|21898|12675|30955|19052|19053|18798|51792|16160|14281|21813|21812|14677|52432|11421|16150|15979|18033|12370|19697|14102|18795|19094|29857|18710|12501|16183|11652|14082|18797|16151|12062|26420|17874|16153|14682|14683|14680|14…	http://www.genome.jp/kegg-bin/show_pathway?mmu05142/mmu:14672%09red/mmu:73699%09red/mmu:18033%09red/mmu:18709%09red/mmu:26416%09red/mmu:432530%09red/mmu:14682%09red/mmu:16183%09red/mmu:14680%09red/mmu:22034%09red/mmu:21809%09red/mmu:21808%09red/mmu:19697%09red/mmu:18708%09red/mmu:12062%09red/mmu:18706%09red/mmu:12675%09red/mmu:16193%09red/mmu:21926%09red/mmu:21803%09red/mmu:15979%09red/mmu:26417%…
Adherens junction	KEGG PATHWAY	mmu04520	64	74	2.84e-06	9.46e-06	19263|20613|18099|14182|16337|19268|22376|26413|17128|242687|20779|26417|14158|12540|99167|17126|17127|19294|11848|380928|170758|245880|93742|11465|29875|16001|11461|21812|21813|67653|19246|19353|21872|227377|19354|19274|13866|71740|17356|12914|19271|15170|12550|12995|26409|17295|13649|12388|21416|21415|21414|12385|58998|12386|13000|58235|20583|11474|328572|73178|108100|12387|83767|22330	http://www.genome.jp/kegg-bin/show_pathway?mmu04520/mmu:12995%09red/mmu:22330%09red/mmu:14158%09red/mmu:328572%09red/mmu:19294%09red/mmu:22376%09red/mmu:12550%09red/mmu:11848%09red/mmu:83767%09red/mmu:73178%09red/mmu:58998%09red/mmu:67653%09red/mmu:93742%09red/mmu:11474%09red/mmu:16337%09red/mmu:13866%09red/mmu:227377%09red/mmu:19246%09red/mmu:108100%09red/mmu:26413%09red/mmu:14182%09red/mmu:2987…
Cell cycle	KEGG PATHWAY	mmu04110	92	125	3.12e-06	1.03e-05	69010|20843|211586|56637|66671|59008|30939|66440|19645|20842|52206|50883|66156|56371|12534|12532|12530|56438|27401|13557|13555|19650|328572|17246|18393|433759|17222|12428|12581|218294|15182|19651|19357|12914|104394|26428|12649|11350|11920|56452|105988|22627|22629|22628|17873|17128|12567|17120|17126|17127|12444|12445|12443|12448|12566|12237|56150|22630|22631|55948|12578|12572|12571|12576|12577|125…	http://www.genome.jp/kegg-bin/show_pathway?mmu04110/mmu:23834%09red/mmu:55948%09red/mmu:66671%09red/mmu:433759%09red/mmu:17873%09red/mmu:11920%09red/mmu:242705%09red/mmu:52206%09red/mmu:19357%09red/mmu:12581%09red/mmu:328572%09red/mmu:12428%09red/mmu:229776%09red/mmu:30939%09red/mmu:105988%09red/mmu:17215%09red/mmu:17217%09red/mmu:17216%09red/mmu:17219%09red/mmu:17218%09red/mmu:12534%09red/mmu:12…
Tuberculosis	KEGG PATHWAY	mmu05152	120	179	3.22e-06	1.05e-05	240354|56632|20846|20779|11783|11984|12370|12371|16160|20963|110157|18779|494124|108058|21926|29857|108960|11652|117149|14998|328572|16176|16175|16179|140494|15980|12265|672195|16415|26413|16411|26417|26414|26415|27060|26419|16784|20698|19094|69165|12315|12313|225326|14129|19059|14127|12912|12914|17874|26420|12323|12322|12325|16019|192656|12122|16154|16155|26416|70405|22034|19349|19344|19345|1969…	http://www.genome.jp/kegg-bin/show_pathway?mmu05152/mmu:12313%09red/mmu:13115%09red/mmu:240354%09red/mmu:19697%09red/mmu:71609%09red/mmu:21926%09red/mmu:15979%09red/mmu:14969%09red/mmu:19349%09red/mmu:19345%09red/mmu:19344%09red/mmu:12611%09red/mmu:11848%09red/mmu:14082%09red/mmu:19055%09red/mmu:16706%09red/mmu:19056%09red/mmu:117149%09red/mmu:19059%09red/mmu:13063%09red/mmu:11984%09red/mmu:14960…
Long-term potentiation	KEGG PATHWAY	mmu04720	59	66	3.4e-06	1.1e-05	14799|70405|26396|18176|14814|110651|26413|26417|109880|16439|16438|20111|20112|19058|19059|18796|18797|80796|12322|215449|18798|19055|19056|18750|18751|18752|12315|12313|110157|18795|14800|494124|12325|14812|11836|16653|108058|432530|12914|108071|15461|16440|12288|14682|19047|19046|19045|12323|14816|109905|328572|14813|12326|14811|14810|223864|67071|11514|18749	http://www.genome.jp/kegg-bin/show_pathway?mmu04720/mmu:12313%09red/mmu:18749%09red/mmu:215449%09red/mmu:14816%09red/mmu:14682%09red/mmu:14814%09red/mmu:14812%09red/mmu:14813%09red/mmu:14810%09red/mmu:14811%09red/mmu:19056%09red/mmu:11514%09red/mmu:18798%09red/mmu:26417%09red/mmu:18795%09red/mmu:110651%09red/mmu:26413%09red/mmu:20111%09red/mmu:20112%09red/mmu:18176%09red/mmu:19055%09red/mmu:43253…
Gap junction	KEGG PATHWAY	mmu04540	70	86	4.33e-06	1.38e-05	18176|14678|14677|54195|14672|22153|26413|22151|20779|26417|22154|16439|18591|15559|18590|18595|13489|18796|18797|14679|13488|104318|20663|18798|18795|23939|18750|18751|54635|26396|110157|71785|67951|15558|18596|21872|16438|14784|16653|14617|19092|19091|13645|26405|11554|14609|15461|22145|238463|15560|13649|22143|16440|12534|60596|14682|14683|14745|210044|18752|11513|11512|14816|53857|224129|1041…	http://www.genome.jp/kegg-bin/show_pathway?mmu04540/mmu:14672%09red/mmu:22154%09red/mmu:18749%09red/mmu:22153%09red/mmu:15560%09red/mmu:14816%09red/mmu:14682%09red/mmu:210044%09red/mmu:224129%09red/mmu:11512%09red/mmu:16439%09red/mmu:11514%09red/mmu:104318%09red/mmu:26417%09red/mmu:18795%09red/mmu:19092%09red/mmu:26413%09red/mmu:238463%09red/mmu:104111%09red/mmu:18176%09red/mmu:18797%09red/mmu:26…
Osteoclast differentiation	KEGG PATHWAY	mmu04380	95	133	5.27e-06	1.66e-05	16477|16476|19261|54721|20847|20846|18019|18018|19016|12675|20375|20963|18383|29857|26400|12703|12702|26409|83433|16176|16177|16175|18412|15980|26413|16416|26416|26417|26414|26415|26419|12311|26399|19353|14129|23797|12912|26420|68652|14728|17972|14282|21926|16391|13038|12326|14284|16150|16151|22030|14389|22034|14130|100038947|19697|19698|19058|19059|21682|17969|19055|19056|320207|21934|53859|1873…	http://www.genome.jp/kegg-bin/show_pathway?mmu04380/mmu:15976%09red/mmu:26400%09red/mmu:15975%09red/mmu:19697%09red/mmu:19698%09red/mmu:21926%09red/mmu:15979%09red/mmu:19055%09red/mmu:17972%09red/mmu:19056%09red/mmu:19059%09red/mmu:19058%09red/mmu:12229%09red/mmu:14389%09red/mmu:83433%09red/mmu:26399%09red/mmu:19353%09red/mmu:16177%09red/mmu:16176%09red/mmu:16175%09red/mmu:13058%09red/mmu:14130%0…
Gastric acid secretion	KEGG PATHWAY	mmu04971	62	73	5.97e-06	1.86e-05	16518|70405|14679|14678|14677|18798|11944|22350|20544|18795|12426|12638|16439|16438|72258|11928|107589|12323|18796|18797|246133|56379|16526|12671|18750|18751|18752|12315|11461|12313|228785|20606|11933|11932|11931|80796|238564|232975|16535|108058|16513|16516|16517|16440|208890|98660|67821|15466|494124|14682|14683|210044|11513|11512|12349|12322|224129|104111|12325|432530|11514|18749	http://www.genome.jp/kegg-bin/show_pathway?mmu04971/mmu:12313%09red/mmu:22350%09red/mmu:18798%09red/mmu:432530%09red/mmu:14682%09red/mmu:210044%09red/mmu:224129%09red/mmu:16517%09red/mmu:70405%09red/mmu:232975%09red/mmu:11512%09red/mmu:16439%09red/mmu:11514%09red/mmu:20544%09red/mmu:12671%09red/mmu:14677%09red/mmu:67821%09red/mmu:18795%09red/mmu:238564%09red/mmu:12638%09red/mmu:104111%09red/mmu:1…
Amphetamine addiction	KEGG PATHWAY	mmu05031	59	68	6.36e-06	1.95e-05	14799|70405|16476|21823|242443|14814|14282|214084|208647|17161|53623|109731|19058|19059|80796|13488|19055|19056|18750|18751|14802|12315|12313|433759|13162|78284|12912|14812|20907|14800|494124|12325|11838|231991|18610|108058|18752|12915|224129|26427|12288|12289|93759|14683|19049|19047|19046|19045|13195|12323|12322|14281|14813|12326|14811|14810|110877|11909|18749	http://www.genome.jp/kegg-bin/show_pathway?mmu05031/mmu:12313%09red/mmu:20907%09red/mmu:17161%09red/mmu:14683%09red/mmu:13488%09red/mmu:14814%09red/mmu:224129%09red/mmu:14812%09red/mmu:14813%09red/mmu:14810%09red/mmu:14811%09red/mmu:93759%09red/mmu:242443%09red/mmu:21823%09red/mmu:13195%09red/mmu:433759%09red/mmu:18749%09red/mmu:19055%09red/mmu:13162%09red/mmu:19056%09red/mmu:11909%09red/mmu:7040…
Glucagon signaling pathway	KEGG PATHWAY	mmu04922	78	102	6.42e-06	1.95e-05	12912|19082|70405|14682|20525|20526|74551|12895|12894|18648|17691|110078|208647|107476|16828|16439|16438|23797|104570|19058|19059|18796|18797|80796|19013|56420|74343|19079|18798|19055|19056|103988|241113|12315|12313|102093|18679|110094|105787|494124|108079|231991|108058|12914|68961|14121|15469|12325|14378|19017|16833|26427|14527|16440|14377|14526|18682|108097|11909|93759|14683|18795|210044|18597|…	http://www.genome.jp/kegg-bin/show_pathway?mmu04922/mmu:12313%09red/mmu:107476%09red/mmu:68961%09red/mmu:14527%09red/mmu:12912%09red/mmu:14683%09red/mmu:14682%09red/mmu:210044%09red/mmu:14936%09red/mmu:105787%09red/mmu:70405%09red/mmu:241113%09red/mmu:93759%09red/mmu:14526%09red/mmu:18648%09red/mmu:12895%09red/mmu:56458%09red/mmu:18795%09red/mmu:19079%09red/mmu:20525%09red/mmu:20526%09red/mmu:235…
Jak-STAT signaling pathway	KEGG PATHWAY	mmu04630	109	161	6.45e-06	1.95e-05	20849|20848|54721|20847|54607|20844|59004|16846|16847|16161|16160|16163|16162|16165|16164|16169|16168|110157|239114|213208|20846|12700|12703|12702|56324|14580|17480|16878|328572|18414|15980|229615|12985|12984|12983|12982|60504|60505|14199|230828|20850|237313|20852|12914|14600|192157|16158|16391|16153|16154|16155|16157|16880|53603|23797|12444|12445|12443|19116|216233|18709|71724|14784|16183|16185|…	http://www.genome.jp/kegg-bin/show_pathway?mmu04630/mmu:100038993%09red/mmu:192157%09red/mmu:15976%09red/mmu:15975%09red/mmu:213208%09red/mmu:15979%09red/mmu:71724%09red/mmu:60505%09red/mmu:60504%09red/mmu:15170%09red/mmu:16878%09red/mmu:16162%09red/mmu:242700%09red/mmu:19116%09red/mmu:53603%09red/mmu:328572%09red/mmu:230828%09red/mmu:16847%09red/mmu:16846%09red/mmu:17480%09red/mmu:15461%09red/mm…
Sphingolipid metabolism	KEGG PATHWAY	mmu00600	47	48	6.73e-06	2.01e-05	241447|93898|22239|22234|56632|433323|11883|18010|11886|23956|20397|20773|20698|14559|19012|230101|70750|66190|11605|54447|12091|20597|13244|20598|50877|241159|67260|230379|228677|71949|74442|67916|268656|77626|14420|58994|81535|14466|70059|619326|171168|50784|223753|545975|56386|238011|53897	http://www.genome.jp/kegg-bin/show_pathway?mmu00600/mmu:11605%09red/mmu:13244%09red/mmu:268656%09red/mmu:14420%09red/mmu:66190%09red/mmu:23956%09red/mmu:241159%09red/mmu:56386%09red/mmu:241447%09red/mmu:433323%09red/mmu:58994%09red/mmu:67916%09red/mmu:93898%09red/mmu:74442%09red/mmu:56632%09red/mmu:223753%09red/mmu:238011%09red/mmu:18010%09red/mmu:20773%09red/mmu:230379%09red/mmu:12091%09red/mmu:…
Insulin secretion	KEGG PATHWAY	mmu04911	69	86	7.06e-06	2.07e-05	67821|18609|16334|20525|20614|20907|18798|233081|14672|14652|208647|12912|18795|12323|18796|18797|20191|20526|68667|54652|12671|84036|103988|18750|18751|18752|56508|100502876|224129|11933|11932|11931|19339|16533|16531|232975|231991|108058|16514|26875|12915|72413|11514|11936|26427|98660|16440|12288|12289|14526|11909|14682|14683|210044|11517|11516|140493|11513|11512|11928|12322|78284|104111|12325|4…	http://www.genome.jp/kegg-bin/show_pathway?mmu04911/mmu:20907%09red/mmu:18798%09red/mmu:14526%09red/mmu:54652%09red/mmu:16514%09red/mmu:432530%09red/mmu:14682%09red/mmu:210044%09red/mmu:224129%09red/mmu:232975%09red/mmu:11512%09red/mmu:84036%09red/mmu:11514%09red/mmu:11516%09red/mmu:11517%09red/mmu:12912%09red/mmu:12671%09red/mmu:67821%09red/mmu:18795%09red/mmu:140493%09red/mmu:20525%09red/mmu:20…
Aldosterone synthesis and secretion	KEGG PATHWAY	mmu04925	69	86	7.06e-06	2.07e-05	239556|70405|16527|18760|75292|14672|20845|109305|208647|58226|104111|16439|16438|18795|207728|18796|18797|12315|12291|18160|18798|18752|18750|18751|11607|18227|18754|12313|224129|12912|54652|101540|16890|231871|15492|231991|108058|110115|20778|12915|215303|16835|269060|11514|26427|16440|12288|12289|494124|223604|80796|15493|14682|14683|210044|11513|11512|12323|12322|15496|15497|78284|12326|12325…	http://www.genome.jp/kegg-bin/show_pathway?mmu04925/mmu:12313%09red/mmu:11607%09red/mmu:269060%09red/mmu:54652%09red/mmu:432530%09red/mmu:14682%09red/mmu:210044%09red/mmu:224129%09red/mmu:215303%09red/mmu:70405%09red/mmu:227541%09red/mmu:11512%09red/mmu:11513%09red/mmu:11514%09red/mmu:494124%09red/mmu:18760%09red/mmu:75292%09red/mmu:12291%09red/mmu:104111%09red/mmu:18749%09red/mmu:14683%09red/mmu…
VEGF signaling pathway	KEGG PATHWAY	mmu04370	54	60	7.59e-06	2.2e-05	329502|18707|18706|18176|320207|18709|56632|19055|26413|74769|20779|26417|26415|16542|18019|23797|232889|12371|20698|12540|102626|29857|102238433|170758|19059|19056|18750|18751|18752|26396|110157|19353|19058|18708|19354|19094|18710|78390|16653|14083|18127|15461|15507|27371|18803|271844|17164|19225|19303|22339|30955|11652|26416|216148	http://www.genome.jp/kegg-bin/show_pathway?mmu04370/mmu:78390%09red/mmu:23797%09red/mmu:22339%09red/mmu:12371%09red/mmu:17164%09red/mmu:170758%09red/mmu:18708%09red/mmu:18709%09red/mmu:18706%09red/mmu:320207%09red/mmu:102626%09red/mmu:26417%09red/mmu:26416%09red/mmu:26415%09red/mmu:26413%09red/mmu:19094%09red/mmu:232889%09red/mmu:56632%09red/mmu:18176%09red/mmu:14083%09red/mmu:19055%09red/mmu:165…
Basal cell carcinoma	KEGG PATHWAY	mmu05217	51	55	7.73e-06	2.22e-05	20423|93897|19207|19206|14369|14368|22413|22409|22408|13542|13543|14633|22422|22421|22420|14365|93735|14367|14634|24069|14362|15245|269209|11789|14366|12159|22414|12156|22059|57265|319757|56637|22418|22419|22416|22417|14370|22415|22412|216795|22410|22411|13544|22423|21416|21415|21414|12006|12387|12005|23805	http://www.genome.jp/kegg-bin/show_pathway?mmu05217/mmu:22418%09red/mmu:15245%09red/mmu:56637%09red/mmu:319757%09red/mmu:13543%09red/mmu:13542%09red/mmu:13544%09red/mmu:22409%09red/mmu:14366%09red/mmu:20423%09red/mmu:12006%09red/mmu:12005%09red/mmu:14367%09red/mmu:14368%09red/mmu:14369%09red/mmu:93897%09red/mmu:14362%09red/mmu:22408%09red/mmu:14365%09red/mmu:22420%09red/mmu:93735%09red/mmu:21416%…
Fc gamma R-mediated phagocytosis	KEGG PATHWAY	mmu04666	71	90	7.83e-06	2.23e-05	16331|14389|242687|16886|18720|245880|12929|12928|15162|56632|22376|18750|12631|26413|74769|12632|26417|12540|18479|72508|18706|23797|20698|19012|17969|58988|94176|16885|18708|14130|56378|18751|18752|20963|18754|110157|67771|17357|18709|19353|30955|320207|18719|14129|19354|74192|18717|18710|17118|329502|211914|17096|17909|67916|218038|18707|227753|18805|18806|18803|18753|30948|13196|22325|57257|1…	http://www.genome.jp/kegg-bin/show_pathway?mmu04666/mmu:58988%09red/mmu:14130%09red/mmu:68089%09red/mmu:23797%09red/mmu:17096%09red/mmu:18709%09red/mmu:22376%09red/mmu:83767%09red/mmu:18706%09red/mmu:73178%09red/mmu:67771%09red/mmu:18708%09red/mmu:227753%09red/mmu:16331%09red/mmu:18707%09red/mmu:56632%09red/mmu:11867%09red/mmu:13196%09red/mmu:20963%09red/mmu:14129%09red/mmu:26417%09red/mmu:12631%…
Prolactin signaling pathway	KEGG PATHWAY	mmu04917	62	74	7.99e-06	2.25e-05	20848|16334|18706|18176|320207|21823|18709|18708|54607|56637|26413|74769|18707|20779|26417|26414|26415|26396|26419|12443|23797|12444|16452|14430|19116|13711|30955|20663|16867|56468|192157|29857|216233|20850|110157|21934|20851|18033|20526|19094|18710|14784|16653|56484|20846|16362|12703|12702|15461|20416|26420|271849|19697|103988|13982|13983|12700|14281|67296|11652|26416|216148	http://www.genome.jp/kegg-bin/show_pathway?mmu04917/mmu:320207%09red/mmu:23797%09red/mmu:192157%09red/mmu:18033%09red/mmu:67296%09red/mmu:13983%09red/mmu:13982%09red/mmu:19697%09red/mmu:18708%09red/mmu:18709%09red/mmu:18706%09red/mmu:18707%09red/mmu:56637%09red/mmu:21823%09red/mmu:16334%09red/mmu:54607%09red/mmu:26416%09red/mmu:26415%09red/mmu:26414%09red/mmu:26413%09red/mmu:19094%09red/mmu:20526…
Salmonella infection	KEGG PATHWAY	mmu05132	64	78	9.13e-06	2.55e-05	16476|242687|18643|110350|12540|22376|286940|18645|26413|19878|75477|26416|26417|26414|26415|13427|268973|26419|19877|16593|16193|29857|56378|109333|21898|16803|18033|263803|235661|19349|330122|11465|11461|67771|15979|19353|66824|280408|21872|19094|56212|74192|69582|320795|17874|20310|16594|382562|26420|226421|19697|192176|20303|14281|16176|15980|11867|73178|13426|53791|68089|16175|234663|83767	http://www.genome.jp/kegg-bin/show_pathway?mmu05132/mmu:13426%09red/mmu:13427%09red/mmu:75477%09red/mmu:234663%09red/mmu:68089%09red/mmu:22376%09red/mmu:83767%09red/mmu:18643%09red/mmu:73178%09red/mmu:67771%09red/mmu:19697%09red/mmu:18645%09red/mmu:192176%09red/mmu:109333%09red/mmu:69582%09red/mmu:16193%09red/mmu:66824%09red/mmu:15979%09red/mmu:26417%09red/mmu:26416%09red/mmu:26415%09red/mmu:2641…
Long-term depression	KEGG PATHWAY	mmu04730	54	61	1.04e-05	2.89e-05	12921|14799|26396|18176|14678|14677|54195|14673|14672|26413|73699|26417|109880|16439|16438|53623|232889|14800|18796|18797|14679|102238433|19052|19053|18798|18752|51792|18750|18751|16000|16001|14804|110157|17096|14674|18795|11836|78390|16653|19091|19092|329502|12286|18125|15461|16440|14687|60596|14682|14683|14681|271844|14816|19051	http://www.genome.jp/kegg-bin/show_pathway?mmu04730/mmu:73699%09red/mmu:78390%09red/mmu:14673%09red/mmu:14816%09red/mmu:14682%09red/mmu:16000%09red/mmu:14687%09red/mmu:14681%09red/mmu:26417%09red/mmu:109880%09red/mmu:19092%09red/mmu:26413%09red/mmu:12921%09red/mmu:232889%09red/mmu:18176%09red/mmu:51792%09red/mmu:14683%09red/mmu:19051%09red/mmu:19053%09red/mmu:14804%09red/mmu:14678%09red/mmu:18752…
B cell receptor signaling pathway	KEGG PATHWAY	mmu04662	62	75	1.06e-05	2.92e-05	240354|12483|12517|16476|18706|18176|16331|320207|18709|18708|12902|56637|108723|26413|18037|18036|20663|26417|18033|26377|18707|18019|18018|23797|19058|19059|12520|12675|30955|170758|19697|19055|19056|18751|240168|17096|110157|22325|19353|20963|18733|19354|18710|14784|16653|15170|12042|11652|18021|15461|26396|12518|14281|12478|74769|57257|83490|16150|16151|15985|14130|12229	http://www.genome.jp/kegg-bin/show_pathway?mmu04662/mmu:16476%09red/mmu:320207%09red/mmu:18709%09red/mmu:12517%09red/mmu:23797%09red/mmu:12042%09red/mmu:240354%09red/mmu:18033%09red/mmu:16331%09red/mmu:19697%09red/mmu:170758%09red/mmu:18708%09red/mmu:12518%09red/mmu:18706%09red/mmu:12675%09red/mmu:56637%09red/mmu:240168%09red/mmu:14130%09red/mmu:26417%09red/mmu:12478%09red/mmu:26413%09red/mmu:572…
Arrhythmogenic right ventricular cardiomyopathy (ARVC)	KEGG PATHWAY	mmu05412	61	74	1.32e-05	3.59e-05	24051|16400|67451|16401|56808|54376|54377|16416|13405|16410|20541|109700|20391|16419|13506|319480|12298|20191|16905|12293|16420|12297|12296|12295|12294|11465|11461|241226|192897|11938|319734|81904|54652|16773|16480|320910|24052|24053|16402|16403|13726|14609|12558|104099|12288|12289|13511|21416|21415|21414|12385|12387|12386|16404|16412|11474|12300|213119|16398|140723|13138	http://www.genome.jp/kegg-bin/show_pathway?mmu05412/mmu:16773%09red/mmu:13506%09red/mmu:12558%09red/mmu:56808%09red/mmu:320910%09red/mmu:12289%09red/mmu:16404%09red/mmu:16403%09red/mmu:16402%09red/mmu:16401%09red/mmu:16400%09red/mmu:319734%09red/mmu:67451%09red/mmu:20541%09red/mmu:16398%09red/mmu:11474%09red/mmu:12296%09red/mmu:12297%09red/mmu:12294%09red/mmu:12295%09red/mmu:16416%09red/mmu:10970…
Small cell lung cancer	KEGG PATHWAY	mmu05222	67	85	1.41e-05	3.8e-05	22030|22031|672195|12571|22034|18706|94216|320207|12576|17344|18708|11797|23928|19697|74769|14268|12567|18033|11783|18707|23797|22059|12371|13063|12443|16782|12675|30955|16412|12448|12566|19645|22032|16150|18709|242705|16779|19211|218772|16773|18710|22029|12043|14083|12828|12829|16400|12048|12827|329581|16780|12826|11798|20182|20181|27401|13557|11796|13555|16403|16410|19225|11652|16151|16398|1718…	http://www.genome.jp/kegg-bin/show_pathway?mmu05222/mmu:16773%09red/mmu:12048%09red/mmu:12576%09red/mmu:22031%09red/mmu:22030%09red/mmu:22032%09red/mmu:16403%09red/mmu:22034%09red/mmu:16400%09red/mmu:12371%09red/mmu:17187%09red/mmu:22029%09red/mmu:19697%09red/mmu:18708%09red/mmu:18709%09red/mmu:18706%09red/mmu:12675%09red/mmu:18033%09red/mmu:12571%09red/mmu:14268%09red/mmu:11783%09red/mmu:320207%…
Colorectal cancer	KEGG PATHWAY	mmu05210	55	64	1.55e-05	4.12e-05	16476|672195|18707|18706|320207|18709|18708|19730|56637|23797|72993|17128|26417|109880|26419|17126|17127|22059|12371|13063|12443|26413|30955|170758|17686|11789|14281|21813|110157|67653|26414|21812|19353|19354|11836|18710|17350|12043|11652|26420|12367|11799|21416|21415|21414|12006|12387|12005|74769|23805|21803|11848|21808|21809|13176	http://www.genome.jp/kegg-bin/show_pathway?mmu05210/mmu:12043%09red/mmu:11789%09red/mmu:72993%09red/mmu:11848%09red/mmu:12371%09red/mmu:21808%09red/mmu:67653%09red/mmu:18708%09red/mmu:18709%09red/mmu:18706%09red/mmu:12006%09red/mmu:21803%09red/mmu:17686%09red/mmu:12005%09red/mmu:26417%09red/mmu:26414%09red/mmu:26413%09red/mmu:320207%09red/mmu:19730%09red/mmu:13176%09red/mmu:26419%09red/mmu:56637%…
Adipocytokine signaling pathway	KEGG PATHWAY	mmu04920	60	73	1.65e-05	4.35e-05	22030|74551|19247|20848|20869|20525|19082|12895|12894|109648|56717|19697|18037|78625|26414|26419|16370|16846|23797|16452|216739|18761|19013|12675|74205|18033|19079|241113|21938|50790|20528|14081|433256|68465|72674|94180|105787|108079|16847|16150|14378|12702|16367|16369|14377|26420|108097|20182|20181|19017|100705|108099|21926|18036|71609|100134861|11652|16151|207565|384783	http://www.genome.jp/kegg-bin/show_pathway?mmu04920/mmu:108099%09red/mmu:72674%09red/mmu:18033%09red/mmu:12894%09red/mmu:12895%09red/mmu:23797%09red/mmu:50790%09red/mmu:71609%09red/mmu:74205%09red/mmu:105787%09red/mmu:216739%09red/mmu:241113%09red/mmu:21938%09red/mmu:384783%09red/mmu:16370%09red/mmu:18761%09red/mmu:12675%09red/mmu:21926%09red/mmu:19697%09red/mmu:18036%09red/mmu:207565%09red/mmu:1…
p53 signaling pathway	KEGG PATHWAY	mmu04115	57	68	1.8e-05	4.7e-05	140742|672195|66940|98376|20437|21825|53892|75747|50883|12567|11783|26374|22401|20135|22059|12370|12371|12444|12445|13063|12443|58801|68428|170770|57913|12448|12566|107831|16000|68098|22084|16009|382985|14102|55948|268697|230784|19211|12578|22062|64058|17873|12521|12649|20438|12367|12534|12450|12452|13663|12571|12575|17248|11920|17246|12122|18787	http://www.genome.jp/kegg-bin/show_pathway?mmu04115/mmu:12571%09red/mmu:12444%09red/mmu:12575%09red/mmu:12443%09red/mmu:55948%09red/mmu:12566%09red/mmu:50883%09red/mmu:12371%09red/mmu:12370%09red/mmu:12534%09red/mmu:66940%09red/mmu:170770%09red/mmu:21825%09red/mmu:12450%09red/mmu:12452%09red/mmu:12122%09red/mmu:22401%09red/mmu:11783%09red/mmu:268697%09red/mmu:22084%09red/mmu:12578%09red/mmu:18787…
Progesterone-mediated oocyte maturation	KEGG PATHWAY	mmu04914	69	90	2e-05	5.18e-05	12877|69010|16334|18706|14679|14678|320207|18709|18708|17222|15519|26413|74769|26416|26417|109880|26415|12428|18707|17120|26419|20111|20112|23797|231207|12566|29857|66440|16000|16001|56150|110157|14677|56371|59008|52206|26414|30955|18667|66156|67579|11836|56317|18710|110651|330228|268697|52563|26420|208922|12534|12532|12530|12531|68999|210044|11513|11512|70891|18576|224129|104111|432530|11652|217…	http://www.genome.jp/kegg-bin/show_pathway?mmu04914/mmu:320207%09red/mmu:18708%09red/mmu:26416%09red/mmu:432530%09red/mmu:210044%09red/mmu:224129%09red/mmu:208922%09red/mmu:11512%09red/mmu:12534%09red/mmu:11514%09red/mmu:12532%09red/mmu:12531%09red/mmu:12530%09red/mmu:18706%09red/mmu:68999%09red/mmu:18667%09red/mmu:16334%09red/mmu:26417%09red/mmu:30955%09red/mmu:26415%09red/mmu:26414%09red/mmu:26…
Amoebiasis	KEGG PATHWAY	mmu05146	80	111	2.22e-05	5.71e-05	12828|18707|18706|94216|19344|14676|282663|20706|14672|20710|16415|19697|74769|14268|20707|16153|230558|16193|18750|320207|18797|16780|16779|21898|30955|18033|14083|18798|66222|12279|18751|18752|16160|19345|18709|110382|20708|20709|18708|20726|18795|16773|18710|18796|20723|383548|93806|19349|12829|12842|12843|12826|12827|15507|14675|16409|12367|20248|226421|14682|14683|14680|16414|12479|16782|239…	http://www.genome.jp/kegg-bin/show_pathway?mmu05146/mmu:12279%09red/mmu:16773%09red/mmu:320207%09red/mmu:22330%09red/mmu:432530%09red/mmu:14682%09red/mmu:14680%09red/mmu:18033%09red/mmu:21809%09red/mmu:21808%09red/mmu:18707%09red/mmu:19697%09red/mmu:18708%09red/mmu:18709%09red/mmu:18706%09red/mmu:14676%09red/mmu:16193%09red/mmu:11474%09red/mmu:21926%09red/mmu:21803%09red/mmu:12843%09red/mmu:12842…
Pancreatic secretion	KEGG PATHWAY	mmu04972	75	103	3.09e-05	7.87e-05	26971|237625|67821|18798|53313|19340|11941|20544|67868|12425|229933|80718|12638|16439|11512|22072|18795|12349|18796|18797|20191|381290|12494|215449|12671|18752|11931|18750|18751|20496|17274|11938|11937|224129|54403|67653|66350|80797|19353|18778|16531|232975|233979|16535|16438|69060|11848|22063|99663|11514|11936|67972|98660|16440|67373|12182|320707|14682|14683|18946|210044|26565|11513|11932|11928|…	http://www.genome.jp/kegg-bin/show_pathway?mmu04972/mmu:12494%09red/mmu:67373%09red/mmu:18798%09red/mmu:215449%09red/mmu:22072%09red/mmu:432530%09red/mmu:14682%09red/mmu:210044%09red/mmu:17274%09red/mmu:18946%09red/mmu:11848%09red/mmu:232975%09red/mmu:237625%09red/mmu:11932%09red/mmu:11512%09red/mmu:11513%09red/mmu:11514%09red/mmu:67868%09red/mmu:20544%09red/mmu:98660%09red/mmu:12671%09red/mmu:22…
RNA transport	KEGG PATHWAY	mmu03013	109	170	3.45e-05	8.65e-05	76884|53319|78482|66161|20918|14265|68135|60365|75705|545388|66679|433702|18226|67204|227720|237082|20901|108067|73666|75826|381404|13688|234865|59015|66085|13685|13684|74097|27374|170722|103573|19069|66603|19384|19387|103468|20220|72787|70047|102614|20610|13690|67543|97112|269966|218210|68134|218693|192160|19704|20595|116940|68092|71805|110379|20430|114615|226982|78428|13664|13667|56347|26905|53…	http://www.genome.jp/kegg-bin/show_pathway?mmu03013/mmu:231042%09red/mmu:53356%09red/mmu:13685%09red/mmu:331401%09red/mmu:13684%09red/mmu:13688%09red/mmu:76884%09red/mmu:72124%09red/mmu:75826%09red/mmu:66161%09red/mmu:208366%09red/mmu:26908%09red/mmu:26905%09red/mmu:66679%09red/mmu:114615%09red/mmu:116940%09red/mmu:67543%09red/mmu:230721%09red/mmu:71844%09red/mmu:20901%09red/mmu:237221%09red/mmu:…
ECM-receptor interaction	KEGG PATHWAY	mmu04512	64	83	3.46e-05	8.65e-05	15891|16403|21960|15530|22371|16401|21826|14724|12833|16416|14268|16410|114249|109700|12839|20750|16419|12826|19699|319480|104099|16780|12505|16782|243816|94216|15366|64051|12841|192897|64176|68553|12845|241226|16779|245026|12834|16773|320910|16404|665033|16402|12829|16400|20969|12842|12843|12840|12827|16420|54368|75209|16423|16412|14723|23928|21825|20971|213119|81877|12828|16398|13138|226519	http://www.genome.jp/kegg-bin/show_pathway?mmu04512/mmu:16773%09red/mmu:665033%09red/mmu:16779%09red/mmu:15366%09red/mmu:16423%09red/mmu:22371%09red/mmu:16403%09red/mmu:16402%09red/mmu:16401%09red/mmu:16400%09red/mmu:104099%09red/mmu:21960%09red/mmu:21826%09red/mmu:19699%09red/mmu:20971%09red/mmu:21825%09red/mmu:12843%09red/mmu:12842%09red/mmu:12841%09red/mmu:12840%09red/mmu:54368%09red/mmu:14268…
mRNA surveillance pathway	KEGG PATHWAY	mmu03015	71	96	3.48e-05	8.65e-05	53319|14853|67543|108062|54451|233789|68219|94230|93728|68188|73699|71978|56422|98985|51796|60365|51792|545388|74320|54196|21681|19052|19053|103677|192160|225363|66441|433702|68134|67897|216578|19704|52432|68092|237082|54188|432508|105083|77305|74737|381404|19826|326622|66899|19054|241989|26931|51786|26932|17690|269061|20220|24018|170722|21770|59032|19046|19045|78428|19047|76626|83410|226517|1878…	http://www.genome.jp/kegg-bin/show_pathway?mmu03015/mmu:53319%09red/mmu:73699%09red/mmu:237082%09red/mmu:71978%09red/mmu:68134%09red/mmu:74320%09red/mmu:54188%09red/mmu:226849%09red/mmu:66441%09red/mmu:77305%09red/mmu:235542%09red/mmu:14853%09red/mmu:108062%09red/mmu:78428%09red/mmu:269643%09red/mmu:68219%09red/mmu:233789%09red/mmu:68188%09red/mmu:59032%09red/mmu:326622%09red/mmu:21770%09red/mmu:…
Pertussis	KEGG PATHWAY	mmu05133	59	74	3.55e-05	8.73e-05	16476|317677|22034|18033|15900|14678|14677|66824|16415|26413|70405|26416|26417|26414|26415|26419|54131|16193|20311|14679|21898|225471|16412|107607|12258|16160|12315|12313|50909|26420|67653|80796|494124|22789|19094|11848|29857|17874|16362|15139|16402|12263|16409|12367|12631|16153|19697|117149|16414|12369|21926|12268|14281|16176|17087|16175|12632|266632|16179	http://www.genome.jp/kegg-bin/show_pathway?mmu05133/mmu:12313%09red/mmu:16409%09red/mmu:17087%09red/mmu:16402%09red/mmu:70405%09red/mmu:15900%09red/mmu:11848%09red/mmu:19697%09red/mmu:50909%09red/mmu:494124%09red/mmu:16193%09red/mmu:21926%09red/mmu:12258%09red/mmu:66824%09red/mmu:14677%09red/mmu:26417%09red/mmu:12631%09red/mmu:26415%09red/mmu:26414%09red/mmu:26413%09red/mmu:19094%09red/mmu:18033%…
Hematopoietic cell lineage	KEGG PATHWAY	mmu04640	66	87	3.75e-05	9.14e-05	12483|12480|12481|12978|12484|12489|12902|12985|16416|16199|16194|109700|17380|16197|16190|16196|16192|16193|12525|12502|12501|12526|12507|12505|12504|12509|16403|16191|17311|14256|16401|12490|12493|12494|14129|14128|14723|14969|14255|12500|16402|16178|16400|16184|12977|333883|54368|16409|16590|100042555|16790|12516|12478|14724|233274|16158|21926|22042|13136|16176|16177|16175|16398|16157|12479|12…	http://www.genome.jp/kegg-bin/show_pathway?mmu04640/mmu:12494%09red/mmu:17311%09red/mmu:12490%09red/mmu:233274%09red/mmu:16409%09red/mmu:12493%09red/mmu:100038993%09red/mmu:16403%09red/mmu:16402%09red/mmu:16401%09red/mmu:16400%09red/mmu:16199%09red/mmu:14723%09red/mmu:16398%09red/mmu:12516%09red/mmu:16191%09red/mmu:16190%09red/mmu:16193%09red/mmu:16192%09red/mmu:21926%09red/mmu:16194%09red/mmu:16…
Salivary secretion	KEGG PATHWAY	mmu04970	61	78	3.92e-05	9.48e-05	67821|70405|17105|18798|54195|71395|76113|11941|20544|494124|16439|11549|11548|18795|18796|18797|20192|381290|12671|18752|18750|18751|20496|12315|12313|64177|11936|11933|11932|11931|80796|16531|232975|12494|17110|16438|19091|19092|11554|18125|11556|67972|98660|16440|74180|12182|14683|60596|14682|320707|210044|11513|11512|11928|224129|104111|432530|22318|11514|11830|18749	http://www.genome.jp/kegg-bin/show_pathway?mmu04970/mmu:12313%09red/mmu:12494%09red/mmu:432530%09red/mmu:14682%09red/mmu:74180%09red/mmu:224129%09red/mmu:16438%09red/mmu:70405%09red/mmu:232975%09red/mmu:11512%09red/mmu:11513%09red/mmu:11514%09red/mmu:20544%09red/mmu:12671%09red/mmu:19091%09red/mmu:19092%09red/mmu:76113%09red/mmu:104111%09red/mmu:18749%09red/mmu:11548%09red/mmu:14683%09red/mmu:115…
Measles	KEGG PATHWAY	mmu05162	93	139	4.03e-05	9.68e-05	20848|54721|12487|18761|20847|20846|56637|68135|12675|16160|16163|13000|68098|14102|54123|26409|230073|23961|23960|16176|319642|16175|16179|15980|17221|54131|12502|12501|12500|69165|20850|20851|15482|17874|12995|12443|68652|228607|22062|16391|21929|22034|22035|14130|21336|19697|12448|170780|23797|12444|12445|13448|170770|12567|12566|21933|18708|246730|16183|16185|16184|15467|19106|12571|12576|266…	http://www.genome.jp/kegg-bin/show_pathway?mmu05162/mmu:13448%09red/mmu:15976%09red/mmu:21929%09red/mmu:19697%09red/mmu:15979%09red/mmu:19106%09red/mmu:17874%09red/mmu:22062%09red/mmu:12502%09red/mmu:12500%09red/mmu:12501%09red/mmu:15975%09red/mmu:16176%09red/mmu:16175%09red/mmu:228607%09red/mmu:16179%09red/mmu:15467%09red/mmu:14130%09red/mmu:23797%09red/mmu:54721%09red/mmu:170770%09red/mmu:24672…
Type II diabetes mellitus	KEGG PATHWAY	mmu04930	45	50	4.2e-05	0.0001	18753|18609|16334|18706|20526|16337|20528|18709|18762|56717|26413|74769|26417|26414|18707|26419|16370|212032|216019|30955|12291|12290|320207|216233|18754|18708|378435|18710|16514|12286|12287|16367|15275|15277|16369|12288|12289|26420|103988|12703|21926|12702|67296|16150|384783	http://www.genome.jp/kegg-bin/show_pathway?mmu04930/mmu:212032%09red/mmu:67296%09red/mmu:384783%09red/mmu:18609%09red/mmu:18708%09red/mmu:18709%09red/mmu:18706%09red/mmu:18707%09red/mmu:18762%09red/mmu:378435%09red/mmu:21926%09red/mmu:16334%09red/mmu:16337%09red/mmu:26417%09red/mmu:18753%09red/mmu:26414%09red/mmu:26413%09red/mmu:12290%09red/mmu:12291%09red/mmu:20528%09red/mmu:320207%09red/mmu:264…
Acute myeloid leukemia	KEGG PATHWAY	mmu05221	49	57	4.36e-05	0.000103011	20848|18707|18706|18176|320207|18709|18708|18710|56717|26413|74769|20663|26417|109880|13685|72508|23797|12443|12675|58988|12394|18854|20375|26396|20850|110157|19401|20851|18033|19697|12395|11836|18715|14784|16653|18712|14255|16150|16480|16151|15461|12606|16590|21416|21415|21414|30955|11652|235320	http://www.genome.jp/kegg-bin/show_pathway?mmu05221/mmu:13685%09red/mmu:20851%09red/mmu:23797%09red/mmu:18033%09red/mmu:18712%09red/mmu:18854%09red/mmu:19697%09red/mmu:18708%09red/mmu:18709%09red/mmu:18706%09red/mmu:12675%09red/mmu:12395%09red/mmu:12394%09red/mmu:26417%09red/mmu:56717%09red/mmu:20850%09red/mmu:26413%09red/mmu:235320%09red/mmu:320207%09red/mmu:18176%09red/mmu:16590%09red/mmu:21416…
Non-small cell lung cancer	KEGG PATHWAY	mmu05223	48	56	5.45e-05	0.000127773	12571|18707|18706|18176|320207|18709|18708|18710|18607|26413|74769|20663|56289|109880|54354|23797|22059|12371|12443|30955|12567|18750|18751|18752|26396|19645|110157|78798|242705|58231|218772|11836|13866|14784|16653|56484|13645|15461|13649|12578|20182|18803|20181|13557|13555|21802|11652|26417	http://www.genome.jp/kegg-bin/show_pathway?mmu05223/mmu:12571%09red/mmu:320207%09red/mmu:23797%09red/mmu:12578%09red/mmu:12371%09red/mmu:56289%09red/mmu:18708%09red/mmu:18709%09red/mmu:18706%09red/mmu:18707%09red/mmu:21802%09red/mmu:13866%09red/mmu:26413%09red/mmu:18176%09red/mmu:14784%09red/mmu:11836%09red/mmu:20663%09red/mmu:18752%09red/mmu:26417%09red/mmu:12567%09red/mmu:109880%09red/mmu:78798…
NF-kappa B signaling pathway	KEGG PATHWAY	mmu04064	74	104	5.91e-05	0.000137348	240354|22031|21947|217069|15894|100504346|66724|11920|108723|19697|12633|59004|18033|11545|17000|22196|19698|20310|20315|21898|12675|225471|18751|66513|53859|20963|19766|100504239|22034|21934|21939|16150|22030|13000|18761|68652|71609|100862177|24099|22029|12042|12043|17096|12995|17873|26409|12048|16151|22329|230073|57913|17874|11798|18792|18803|117149|100042493|16818|11797|11796|20303|21926|19225…	http://www.genome.jp/kegg-bin/show_pathway?mmu04064/mmu:217069%09red/mmu:12995%09red/mmu:108723%09red/mmu:12048%09red/mmu:16803%09red/mmu:22031%09red/mmu:12042%09red/mmu:17087%09red/mmu:22034%09red/mmu:117149%09red/mmu:21929%09red/mmu:24099%09red/mmu:18761%09red/mmu:12675%09red/mmu:19698%09red/mmu:72049%09red/mmu:20963%09red/mmu:19697%09red/mmu:240354%09red/mmu:12633%09red/mmu:22196%09red/mmu:219…
Regulation of lipolysis in adipocytes	KEGG PATHWAY	mmu04923	48	57	7.34e-05	0.000169329	16334|18706|14679|16337|320207|18709|18708|109648|74769|14678|18707|16370|23797|30955|103968|19225|14677|67469|16890|19218|18160|18710|22095|11832|19091|19092|224129|16367|11554|18166|11556|16369|66853|11539|14683|210044|23945|11513|11512|18576|19224|225845|104111|432530|11652|11514|18749|384783	http://www.genome.jp/kegg-bin/show_pathway?mmu04923/mmu:109648%09red/mmu:432530%09red/mmu:210044%09red/mmu:224129%09red/mmu:11512%09red/mmu:11539%09red/mmu:384783%09red/mmu:16370%09red/mmu:18708%09red/mmu:18709%09red/mmu:18706%09red/mmu:320207%09red/mmu:16334%09red/mmu:16337%09red/mmu:19091%09red/mmu:19092%09red/mmu:104111%09red/mmu:18749%09red/mmu:14683%09red/mmu:11554%09red/mmu:19224%09red/mmu:…
Central carbon metabolism in cancer	KEGG PATHWAY	mmu05230	53	66	7.57e-05	0.00017325	15251|18642|20525|18176|19713|18709|18708|18710|56717|18213|26413|74769|26417|16828|18707|18596|18597|18706|18595|23797|20526|56421|320207|228026|26396|110157|216456|80879|22059|212032|14660|13866|19211|16653|20539|14255|18648|15277|15461|17295|20514|13649|50721|16590|103988|14183|14182|14184|216019|319801|30955|11652|15275	http://www.genome.jp/kegg-bin/show_pathway?mmu05230/mmu:14660%09red/mmu:320207%09red/mmu:228026%09red/mmu:23797%09red/mmu:18642%09red/mmu:212032%09red/mmu:18708%09red/mmu:18709%09red/mmu:18706%09red/mmu:18707%09red/mmu:18596%09red/mmu:18648%09red/mmu:20526%09red/mmu:14184%09red/mmu:20525%09red/mmu:14182%09red/mmu:14183%09red/mmu:50721%09red/mmu:18176%09red/mmu:16590%09red/mmu:56717%09red/mmu:2164…
Endometrial cancer	KEGG PATHWAY	mmu05213	45	52	7.88e-05	0.000178968	12005|18707|18706|18176|320207|18709|18708|18710|18607|56637|26413|74769|20663|26417|109880|11789|22059|12371|12443|30955|13712|26396|110157|16202|19211|23797|11836|13866|14784|16653|17350|56484|12550|13645|15461|13649|21416|21415|21414|12385|12387|12386|23805|12006|11652	http://www.genome.jp/kegg-bin/show_pathway?mmu05213/mmu:320207%09red/mmu:23797%09red/mmu:12550%09red/mmu:12371%09red/mmu:18708%09red/mmu:18709%09red/mmu:18706%09red/mmu:12006%09red/mmu:12005%09red/mmu:13866%09red/mmu:16202%09red/mmu:26413%09red/mmu:13712%09red/mmu:18176%09red/mmu:11789%09red/mmu:56637%09red/mmu:21416%09red/mmu:21414%09red/mmu:21415%09red/mmu:14784%09red/mmu:109880%09red/mmu:20663…
Renin secretion	KEGG PATHWAY	mmu04924	56	72	8.78e-05	0.000197907	70405|14679|14678|14677|54195|19219|18795|229933|16439|16438|19058|19059|18796|18797|54652|16531|13617|18798|19055|19056|12722|11607|12315|12313|11421|80797|80796|16518|11826|494124|18160|54611|12912|19217|19092|99663|11554|11556|109305|16440|12288|12289|11539|60596|14682|14683|11517|11516|11512|18574|18575|18576|224129|18573|13030|18749	http://www.genome.jp/kegg-bin/show_pathway?mmu04924/mmu:12313%09red/mmu:13030%09red/mmu:11607%09red/mmu:11826%09red/mmu:14683%09red/mmu:14682%09red/mmu:11556%09red/mmu:224129%09red/mmu:70405%09red/mmu:11512%09red/mmu:11539%09red/mmu:11516%09red/mmu:11517%09red/mmu:12912%09red/mmu:18795%09red/mmu:19092%09red/mmu:229933%09red/mmu:13617%09red/mmu:18749%09red/mmu:19055%09red/mmu:11554%09red/mmu:19056…
Hedgehog signaling pathway	KEGG PATHWAY	mmu04340	40	44	9.44e-05	0.000211221	109689|320129|20423|26965|70425|19207|19206|216869|16568|14451|14633|13363|14634|24069|12444|12443|104318|15245|103583|26554|12234|93687|16147|110355|20747|319757|66313|76857|12043|56637|16576|27373|103236|57810|59056|14725|214897|75788|240888|18749	http://www.genome.jp/kegg-bin/show_pathway?mmu04340/mmu:12234%09red/mmu:75788%09red/mmu:15245%09red/mmu:16568%09red/mmu:319757%09red/mmu:109689%09red/mmu:70425%09red/mmu:104318%09red/mmu:20423%09red/mmu:26554%09red/mmu:56637%09red/mmu:103583%09red/mmu:76857%09red/mmu:18749%09red/mmu:19206%09red/mmu:19207%09red/mmu:12043%09red/mmu:26965%09red/mmu:59056%09red/mmu:16147%09red/mmu:14634%09red/mmu:146…
Fc epsilon RI signaling pathway	KEGG PATHWAY	mmu04664	54	69	0.00010391	0.000230649	16331|14389|18707|18706|18176|329502|320207|18709|18708|18607|29857|26413|16822|20663|26417|26414|26415|26419|16191|232889|23797|102238433|170758|26397|18750|19094|16163|20963|17096|110157|14126|26399|26398|19353|19354|14127|18710|78390|14784|16653|26400|15461|26396|26420|18803|271844|74769|22325|21926|57257|30955|11652|26416|12229	http://www.genome.jp/kegg-bin/show_pathway?mmu04664/mmu:22325%09red/mmu:78390%09red/mmu:23797%09red/mmu:17096%09red/mmu:16191%09red/mmu:16331%09red/mmu:170758%09red/mmu:18708%09red/mmu:18709%09red/mmu:18706%09red/mmu:320207%09red/mmu:16822%09red/mmu:21926%09red/mmu:20963%09red/mmu:26417%09red/mmu:26416%09red/mmu:26415%09red/mmu:26414%09red/mmu:26413%09red/mmu:19094%09red/mmu:232889%09red/mmu:5725…
Toll-like receptor signaling pathway	KEGG PATHWAY	mmu04620	71	101	0.00010711	0.000235965	22031|142980|22034|18706|16476|66513|18709|18708|20846|54473|15945|26413|26410|26416|26417|26414|26415|18707|20750|54131|16193|12370|12524|320207|26419|21899|21898|12675|225471|18033|26397|15976|15975|26396|19766|16160|21939|26399|16150|19353|20303|56489|23797|19094|29857|56480|18710|17874|26400|14082|53791|16151|26409|26420|68652|54123|12519|19697|117149|74769|26398|21926|16176|14281|13038|17087…	http://www.genome.jp/kegg-bin/show_pathway?mmu04620/mmu:18033%09red/mmu:22031%09red/mmu:13038%09red/mmu:17087%09red/mmu:22034%09red/mmu:53791%09red/mmu:15976%09red/mmu:12519%09red/mmu:15975%09red/mmu:19697%09red/mmu:18708%09red/mmu:18709%09red/mmu:18706%09red/mmu:12675%09red/mmu:16193%09red/mmu:21926%09red/mmu:26417%09red/mmu:26416%09red/mmu:26415%09red/mmu:26414%09red/mmu:26413%09red/mmu:19094%0…
Longevity regulating pathway - multiple species	KEGG PATHWAY	mmu04213	51	64	0.000116819	0.000255431	19082|16334|18706|18176|16337|320207|433759|18709|20480|18710|56717|74769|18707|20656|104111|108099|16370|72508|23797|15182|58988|19079|241113|16000|12359|16001|30955|105787|18708|108079|15482|16653|56484|74370|13688|16367|15461|16369|108097|93759|11793|210044|11513|11512|224129|56458|432530|11652|11514|18749|384783	http://www.genome.jp/kegg-bin/show_pathway?mmu04213/mmu:108099%09red/mmu:18749%09red/mmu:432530%09red/mmu:210044%09red/mmu:224129%09red/mmu:105787%09red/mmu:13688%09red/mmu:241113%09red/mmu:11512%09red/mmu:11513%09red/mmu:384783%09red/mmu:93759%09red/mmu:18708%09red/mmu:18709%09red/mmu:18706%09red/mmu:320207%09red/mmu:16334%09red/mmu:16337%09red/mmu:56458%09red/mmu:30955%09red/mmu:19079%09red/mmu…
Fatty acid metabolism	KEGG PATHWAY	mmu01212	44	52	0.000133247	0.000289196	78625|12895|12894|12896|223722|52538|60527|113868|106529|231086|216739|74205|20250|66885|110446|11409|50790|66775|71147|433256|97212|94180|68801|30049|14104|170439|107476|329065|110460|100134861|14081|80911|57874|54326|20249|19063|30963|111175|70757|76267|56473|56348|11430|54397	http://www.genome.jp/kegg-bin/show_pathway?mmu01212/mmu:107476%09red/mmu:12894%09red/mmu:12895%09red/mmu:12896%09red/mmu:50790%09red/mmu:11430%09red/mmu:74205%09red/mmu:216739%09red/mmu:66775%09red/mmu:329065%09red/mmu:68801%09red/mmu:78625%09red/mmu:20250%09red/mmu:106529%09red/mmu:14081%09red/mmu:30963%09red/mmu:56473%09red/mmu:54326%09red/mmu:14104%09red/mmu:97212%09red/mmu:111175%09red/mmu:52…
Notch signaling pathway	KEGG PATHWAY	mmu04330	42	49	0.000154646	0.000330739	19208|208117|103806|433759|209200|13544|13542|13543|16450|59287|18131|18132|270118|15205|15182|14534|15208|16848|68318|18222|19668|66354|19664|13388|13389|74198|20602|66935|54485|18223|12914|433586|16449|11491|18129|18128|19165|207521|13016|13017|328572|18519	http://www.genome.jp/kegg-bin/show_pathway?mmu04330/mmu:13017%09red/mmu:13016%09red/mmu:66354%09red/mmu:13543%09red/mmu:13542%09red/mmu:13544%09red/mmu:20602%09red/mmu:68318%09red/mmu:54485%09red/mmu:19208%09red/mmu:270118%09red/mmu:207521%09red/mmu:433759%09red/mmu:16449%09red/mmu:209200%09red/mmu:18131%09red/mmu:18132%09red/mmu:19165%09red/mmu:16450%09red/mmu:74198%09red/mmu:13389%09red/mmu:133…
Cocaine addiction	KEGG PATHWAY	mmu05030	42	49	0.000154646	0.000330739	16476|108068|19739|14679|14678|14677|21823|214084|208647|18033|17161|12569|13489|12568|14800|13488|13385|13162|78284|109731|231991|18610|12912|12915|67839|224129|26427|12064|14683|19049|19697|13195|14282|242443|14814|14813|14812|14811|14810|110877|11909|18749	http://www.genome.jp/kegg-bin/show_pathway?mmu05030/mmu:18033%09red/mmu:17161%09red/mmu:14683%09red/mmu:14814%09red/mmu:224129%09red/mmu:14812%09red/mmu:14813%09red/mmu:14810%09red/mmu:14811%09red/mmu:12064%09red/mmu:19697%09red/mmu:242443%09red/mmu:108068%09red/mmu:21823%09red/mmu:13195%09red/mmu:19739%09red/mmu:18749%09red/mmu:13162%09red/mmu:11909%09red/mmu:16476%09red/mmu:14677%09red/mmu:7828…
Leishmaniasis	KEGG PATHWAY	mmu05140	52	67	0.000159455	0.000338553	16476|21809|22034|18033|66513|15000|20846|16415|26413|18036|26416|15002|15001|26415|16452|21898|13712|16412|18751|16160|14281|14969|15979|14961|14960|14129|19094|17357|29857|15170|17874|21808|16401|26409|16409|68652|16179|19697|14998|17969|16414|17972|21926|19225|21803|16176|16175|16019|266632|16153|15980|26417	http://www.genome.jp/kegg-bin/show_pathway?mmu05140/mmu:16409%09red/mmu:22034%09red/mmu:16401%09red/mmu:21809%09red/mmu:21808%09red/mmu:14999%09red/mmu:14998%09red/mmu:19697%09red/mmu:18036%09red/mmu:21803%09red/mmu:21926%09red/mmu:15979%09red/mmu:26417%09red/mmu:26416%09red/mmu:26415%09red/mmu:26413%09red/mmu:19094%09red/mmu:68652%09red/mmu:13712%09red/mmu:18033%09red/mmu:15170%09red/mmu:17972%0…
Synaptic vesicle cycle	KEGG PATHWAY	mmu04721	49	62	0.000180157	0.000379755	13852|20910|20614|103967|18195|12890|338375|214084|13429|27060|11984|11964|74325|12889|72961|108124|110935|22249|242341|19339|20907|21871|140919|232910|11972|76252|56216|20908|11974|11771|12286|12287|11975|382018|11773|208898|225644|68775|73834|140494|235415|116837|11966|71770|216227|22318|110877|11772|20979	http://www.genome.jp/kegg-bin/show_pathway?mmu04721/mmu:11972%09red/mmu:140919%09red/mmu:216227%09red/mmu:11974%09red/mmu:11975%09red/mmu:20910%09red/mmu:13429%09red/mmu:225644%09red/mmu:20979%09red/mmu:76252%09red/mmu:242341%09red/mmu:11964%09red/mmu:56216%09red/mmu:27060%09red/mmu:108124%09red/mmu:22249%09red/mmu:68775%09red/mmu:12890%09red/mmu:72961%09red/mmu:382018%09red/mmu:208898%09red/mmu:…
Pyrimidine metabolism	KEGG PATHWAY	mmu00240	71	104	0.00020034	0.000419283	66979|55936|633979|70428|64424|67005|80914|12495|107569|69870|245841|22171|59001|66491|20133|20019|66588|74414|67967|67065|232223|69241|19076|13178|331487|18971|100862375|23959|20021|12499|382985|70881|67464|20135|67486|22245|22247|50773|68556|50493|171567|78929|72269|12497|215446|66401|66420|56749|18950|21915|110074|26939|70408|18103|18102|103149|54369|22169|99586|57813|18969|18968|76952|26462|2…	http://www.genome.jp/kegg-bin/show_pathway?mmu00240/mmu:23959%09red/mmu:67065%09red/mmu:12497%09red/mmu:20021%09red/mmu:12495%09red/mmu:18968%09red/mmu:215446%09red/mmu:12499%09red/mmu:56749%09red/mmu:72269%09red/mmu:66491%09red/mmu:70408%09red/mmu:18971%09red/mmu:633979%09red/mmu:232223%09red/mmu:171567%09red/mmu:331487%09red/mmu:70428%09red/mmu:67967%09red/mmu:20022%09red/mmu:54369%09red/mmu:99…
Aldosterone-regulated sodium reabsorption	KEGG PATHWAY	mmu04960	36	40	0.000235819	0.000490035	67821|16334|18706|16337|320207|18709|18708|18607|26413|74769|26417|20276|20277|20278|18707|56379|30955|110784|18752|83814|18750|18751|16000|65962|11936|11933|11932|11931|232975|18710|15484|16367|55948|98660|11928|20393	http://www.genome.jp/kegg-bin/show_pathway?mmu04960/mmu:11936%09red/mmu:20276%09red/mmu:18709%09red/mmu:83814%09red/mmu:232975%09red/mmu:18708%09red/mmu:55948%09red/mmu:18706%09red/mmu:18707%09red/mmu:16334%09red/mmu:16337%09red/mmu:26417%09red/mmu:30955%09red/mmu:26413%09red/mmu:20278%09red/mmu:20277%09red/mmu:320207%09red/mmu:11928%09red/mmu:18607%09red/mmu:98660%09red/mmu:20393%09red/mmu:16000…
Spliceosome	KEGG PATHWAY	mmu03040	86	135	0.000251852	0.000519667	53607|53317|60365|81898|545388|110809|68988|433702|67996|78651|22185|217207|66877|14105|66642|73666|231889|66070|19655|51810|55934|71713|68816|66492|69878|233073|66094|72654|67959|70767|68092|66810|56194|67958|15482|20624|229279|20222|20227|28000|67465|20826|225027|20638|20639|60321|67439|20637|66921|13207|56070|21681|57905|57317|67229|212880|75062|108014|193116|76936|74351|67332|68479|70052|6919…	http://www.genome.jp/kegg-bin/show_pathway?mmu03040/mmu:230596%09red/mmu:66070%09red/mmu:55934%09red/mmu:74351%09red/mmu:102638183%09red/mmu:331401%09red/mmu:60321%09red/mmu:66354%09red/mmu:20383%09red/mmu:20382%09red/mmu:13207%09red/mmu:51810%09red/mmu:53607%09red/mmu:81898%09red/mmu:70767%09red/mmu:57317%09red/mmu:212880%09red/mmu:64340%09red/mmu:66810%09red/mmu:225160%09red/mmu:101214%09red/mm…
Intestinal immune network for IgA production	KEGG PATHWAY	mmu04672	38	44	0.000281219	0.000576204	18703|21947|12487|12767|16401|15000|56838|15002|15001|17123|17000|16191|16193|12524|20315|12777|16169|21939|11628|69583|53859|54167|14961|14960|14969|24099|16183|16168|12519|12769|50723|57916|14998|20300|21803|16019|16153|72049	http://www.genome.jp/kegg-bin/show_pathway?mmu04672/mmu:11628%09red/mmu:21947%09red/mmu:16401%09red/mmu:16191%09red/mmu:14999%09red/mmu:14998%09red/mmu:24099%09red/mmu:16193%09red/mmu:12519%09red/mmu:21803%09red/mmu:69583%09red/mmu:72049%09red/mmu:18703%09red/mmu:12777%09red/mmu:50723%09red/mmu:20315%09red/mmu:16168%09red/mmu:16169%09red/mmu:53859%09red/mmu:56838%09red/mmu:12487%09red/mmu:12524%0…
Phagosome	KEGG PATHWAY	mmu04145	113	192	0.000311343	0.000633497	110557|15024|20778|11984|15043|15042|11465|14130|11461|18779|140792|20288|238463|21825|14990|14991|14998|234663|140494|21354|22153|16414|53421|16416|16410|22154|13427|13426|16419|16784|235661|69165|225326|19353|67951|108078|14129|22143|16402|22145|16409|15039|15239|17972|54411|53331|22319|16398|57743|19349|19344|19345|21826|338375|15007|15006|15002|15001|15000|17534|17533|20335|20333|17969|53857|…	http://www.genome.jp/kegg-bin/show_pathway?mmu04145/mmu:22154%09red/mmu:22153%09red/mmu:22151%09red/mmu:14972%09red/mmu:76252%09red/mmu:19349%09red/mmu:238463%09red/mmu:19345%09red/mmu:19344%09red/mmu:20333%09red/mmu:20335%09red/mmu:21354%09red/mmu:17972%09red/mmu:71116%09red/mmu:224761%09red/mmu:11984%09red/mmu:14963%09red/mmu:14960%09red/mmu:14961%09red/mmu:14964%09red/mmu:14969%09red/mmu:19353…
Bladder cancer	KEGG PATHWAY	mmu05219	36	41	0.000324776	0.000656271	18176|21825|26413|20779|56289|109880|22059|69635|13143|13144|15200|12567|26396|19645|110157|242705|11836|13866|16653|12550|13645|15461|17390|17395|13649|12443|12578|13557|14184|13555|12575|72962|22270|22339|17246|26417	http://www.genome.jp/kegg-bin/show_pathway?mmu05219/mmu:12575%09red/mmu:12578%09red/mmu:12550%09red/mmu:22339%09red/mmu:56289%09red/mmu:21825%09red/mmu:14184%09red/mmu:26413%09red/mmu:18176%09red/mmu:72962%09red/mmu:11836%09red/mmu:13144%09red/mmu:13143%09red/mmu:13866%09red/mmu:12567%09red/mmu:109880%09red/mmu:17246%09red/mmu:13557%09red/mmu:13555%09red/mmu:242705%09red/mmu:22270%09red/mmu:26396…
Glycerolipid metabolism	KEGG PATHWAY	mmu00561	46	59	0.000344421	0.000691202	16891|231510|56752|52123|320127|14245|55979|68262|67861|380921|19012|218121|14732|28169|11669|11605|14933|225010|110524|67512|217480|227333|225913|14626|104418|69060|110197|23945|16956|72535|67916|110695|66853|11671|102247|18946|69923|67800|235582|56077|67216|50784|331374|58810|64898|13139	http://www.genome.jp/kegg-bin/show_pathway?mmu00561/mmu:231510%09red/mmu:67512%09red/mmu:102247%09red/mmu:11605%09red/mmu:218121%09red/mmu:331374%09red/mmu:14732%09red/mmu:380921%09red/mmu:14933%09red/mmu:225913%09red/mmu:225010%09red/mmu:11669%09red/mmu:67861%09red/mmu:55979%09red/mmu:56752%09red/mmu:52123%09red/mmu:235582%09red/mmu:14245%09red/mmu:69060%09red/mmu:64898%09red/mmu:110695%09red/mm…
Amyotrophic lateral sclerosis (ALS)	KEGG PATHWAY	mmu05014	42	52	0.000368266	0.000734027	18040|672195|14799|11783|380684|19132|26416|26415|18039|22059|19058|12371|13063|641376|12460|19055|19056|14800|26397|12359|21938|26399|19353|19059|19094|29857|67819|12043|74018|18125|20511|26408|12048|12367|12364|21926|14814|14813|14812|14811|14810|12122	http://www.genome.jp/kegg-bin/show_pathway?mmu05014/mmu:12048%09red/mmu:12043%09red/mmu:14814%09red/mmu:14812%09red/mmu:14813%09red/mmu:14810%09red/mmu:18040%09red/mmu:12371%09red/mmu:21938%09red/mmu:21926%09red/mmu:12359%09red/mmu:18039%09red/mmu:26415%09red/mmu:19094%09red/mmu:11783%09red/mmu:19055%09red/mmu:19056%09red/mmu:641376%09red/mmu:380684%09red/mmu:74018%09red/mmu:19059%09red/mmu:13063…
Nicotine addiction	KEGG PATHWAY	mmu05033	35	40	0.000408002	0.000807734	14799|110886|72961|14397|53623|14800|11441|14394|14395|14396|11440|11444|14812|57249|140919|12286|12287|14408|14404|14405|14406|14407|14400|14401|14402|14403|242443|11438|14814|14813|328699|14811|14810|216227|14802	http://www.genome.jp/kegg-bin/show_pathway?mmu05033/mmu:14401%09red/mmu:14394%09red/mmu:14397%09red/mmu:216227%09red/mmu:14405%09red/mmu:14404%09red/mmu:14407%09red/mmu:140919%09red/mmu:14408%09red/mmu:14814%09red/mmu:14812%09red/mmu:14813%09red/mmu:14810%09red/mmu:14811%09red/mmu:14396%09red/mmu:242443%09red/mmu:14406%09red/mmu:72961%09red/mmu:14395%09red/mmu:14403%09red/mmu:11438%09red/mmu:1440…
Protein digestion and absorption	KEGG PATHWAY	mmu04974	62	90	0.000412051	0.000810275	170745|67821|12813|94216|16529|12834|215335|67373|12833|12814|12817|12816|67868|12836|17380|20541|12839|72461|12819|12818|22072|373864|11928|12827|13717|20514|58803|12826|11936|68553|13482|17254|11932|11931|232975|20510|16535|17288|245026|665033|12828|12829|12842|12843|12840|72472|12821|12822|12815|74338|98660|105243|11933|70008|30962|12831|110893|69700|53867|12841|50934|67760	http://www.genome.jp/kegg-bin/show_pathway?mmu04974/mmu:67373%09red/mmu:665033%09red/mmu:72461%09red/mmu:22072%09red/mmu:17254%09red/mmu:232975%09red/mmu:20541%09red/mmu:67868%09red/mmu:12819%09red/mmu:12843%09red/mmu:12842%09red/mmu:69700%09red/mmu:12840%09red/mmu:17288%09red/mmu:70008%09red/mmu:245026%09red/mmu:30962%09red/mmu:13717%09red/mmu:12821%09red/mmu:12822%09red/mmu:11928%09red/mmu:1282…
Thyroid hormone synthesis	KEGG PATHWAY	mmu04918	52	71	0.000425536	0.000831213	67821|74044|114479|69590|75512|22018|208647|22130|16439|16438|11889|18795|18796|18797|18798|18750|18751|18752|70337|224129|12330|11932|11931|14828|232975|231991|12912|22095|67305|12915|14780|11514|11936|26427|14682|16440|98660|23985|214593|14683|210044|14725|11513|11512|11928|18510|11933|78284|104111|432530|11909|18749	http://www.genome.jp/kegg-bin/show_pathway?mmu04918/mmu:22130%09red/mmu:23985%09red/mmu:22018%09red/mmu:432530%09red/mmu:14682%09red/mmu:210044%09red/mmu:74044%09red/mmu:12330%09red/mmu:232975%09red/mmu:11512%09red/mmu:11513%09red/mmu:11514%09red/mmu:214593%09red/mmu:12912%09red/mmu:98660%09red/mmu:67821%09red/mmu:104111%09red/mmu:18749%09red/mmu:22095%09red/mmu:67305%09red/mmu:14780%09red/mmu:11…
Fanconi anemia pathway	KEGG PATHWAY	mmu03460	41	51	0.000458937	0.000890519	100040608|71711|19361|13870|67561|71718|19714|52864|12190|75764|80905|74386|15205|211651|223970|268465|68275|20892|104806|21975|21976|56210|17350|237911|233826|72775|12189|14087|14088|60534|18861|114714|27015|26447|71885|208836|193838|19891|12144|50505|235610	http://www.genome.jp/kegg-bin/show_pathway?mmu03460/mmu:223970%09red/mmu:268465%09red/mmu:72775%09red/mmu:80905%09red/mmu:237911%09red/mmu:235610%09red/mmu:20892%09red/mmu:12144%09red/mmu:19361%09red/mmu:68275%09red/mmu:14088%09red/mmu:14087%09red/mmu:19714%09red/mmu:67561%09red/mmu:114714%09red/mmu:12190%09red/mmu:50505%09red/mmu:233826%09red/mmu:18861%09red/mmu:100040608%09red/mmu:208836%09red/…
Apoptosis - multiple species	KEGG PATHWAY	mmu04215	30	32	0.000482428	0.000929943	672195|18053|51800|66593|26414|11783|26419|18952|12371|13063|12018|170770|58801|12211|12370|56208|12043|14082|12048|26420|12367|11799|11798|64704|11797|11796|12369|329581|12122|12125	http://www.genome.jp/kegg-bin/show_pathway?mmu04215/mmu:12048%09red/mmu:12043%09red/mmu:12125%09red/mmu:12122%09red/mmu:12211%09red/mmu:12371%09red/mmu:12370%09red/mmu:170770%09red/mmu:66593%09red/mmu:26414%09red/mmu:11783%09red/mmu:18053%09red/mmu:26419%09red/mmu:14082%09red/mmu:18952%09red/mmu:13063%09red/mmu:56208%09red/mmu:58801%09red/mmu:51800%09red/mmu:12367%09red/mmu:329581%09red/mmu:12018…
Mineral absorption	KEGG PATHWAY	mmu04978	38	46	0.000509078	0.000974901	74051|18173|18174|67821|20529|14325|20541|73649|15368|15369|15203|320718|171429|58800|64177|11936|225997|11932|11931|72027|20537|232975|22782|11977|52466|22041|67972|98660|12724|74338|105243|11933|634386|11928|13487|22337|53945|11927	http://www.genome.jp/kegg-bin/show_pathway?mmu04978/mmu:22337%09red/mmu:11977%09red/mmu:15369%09red/mmu:15368%09red/mmu:52466%09red/mmu:232975%09red/mmu:20541%09red/mmu:72027%09red/mmu:67821%09red/mmu:14325%09red/mmu:20529%09red/mmu:18174%09red/mmu:320718%09red/mmu:20537%09red/mmu:171429%09red/mmu:18173%09red/mmu:225997%09red/mmu:105243%09red/mmu:73649%09red/mmu:11928%09red/mmu:11927%09red/mmu:22…
Inflammatory bowel disease (IBD)	KEGG PATHWAY	mmu05321	45	59	0.000551393	0.00104908	16476|20849|20848|18033|20846|19697|15002|15001|15000|60504|60505|16190|17127|16193|18018|21898|20371|17126|16191|16161|16160|16163|16162|20852|15979|14961|14960|19883|14969|16183|21808|53791|17132|57765|16182|14998|21926|21803|16176|16174|16175|16019|21809|16153|15980	http://www.genome.jp/kegg-bin/show_pathway?mmu05321/mmu:18033%09red/mmu:21809%09red/mmu:21808%09red/mmu:14999%09red/mmu:14998%09red/mmu:19697%09red/mmu:19883%09red/mmu:16191%09red/mmu:16190%09red/mmu:16193%09red/mmu:21926%09red/mmu:21803%09red/mmu:15979%09red/mmu:20371%09red/mmu:60505%09red/mmu:60504%09red/mmu:15980%09red/mmu:57765%09red/mmu:16160%09red/mmu:16161%09red/mmu:20848%09red/mmu:16163%0…
Platinum drug resistance	KEGG PATHWAY	mmu01524	55	78	0.000569364	0.00107628	672195|18707|18706|14872|13870|20529|18709|18708|18710|11979|19714|26413|74769|14865|26417|11783|80905|11920|22059|12370|12371|13063|68312|58801|30955|170770|320207|14867|14864|14102|23797|21974|13866|11977|17350|18607|12043|14082|12189|12780|26408|12048|12578|12018|12367|11799|11798|17686|11797|11796|12575|56615|11652|17246|12122	http://www.genome.jp/kegg-bin/show_pathway?mmu01524/mmu:12048%09red/mmu:11977%09red/mmu:12575%09red/mmu:12043%09red/mmu:14872%09red/mmu:11979%09red/mmu:12122%09red/mmu:12371%09red/mmu:12370%09red/mmu:80905%09red/mmu:18708%09red/mmu:170770%09red/mmu:18706%09red/mmu:18707%09red/mmu:11799%09red/mmu:68312%09red/mmu:13866%09red/mmu:26413%09red/mmu:11783%09red/mmu:20529%09red/mmu:17686%09red/mmu:320207…
Hippo signaling pathway -multiple species	KEGG PATHWAY	mmu04392	26	26	0.00059846	0.00112403	16475|18479|329628|22601|18016|232157|211652|215653|319710|56274|101543|97064|21679|21678|21677|21676|233651|73246|27373|16798|100534287|50523|213391|68473|29806|56289	http://www.genome.jp/kegg-bin/show_pathway?mmu04392/mmu:16798%09red/mmu:68473%09red/mmu:319710%09red/mmu:232157%09red/mmu:56289%09red/mmu:21678%09red/mmu:21679%09red/mmu:21676%09red/mmu:21677%09red/mmu:97064%09red/mmu:18016%09red/mmu:211652%09red/mmu:16475%09red/mmu:213391%09red/mmu:29806%09red/mmu:50523%09red/mmu:73246%09red/mmu:329628%09red/mmu:233651%09red/mmu:215653%09red/mmu:27373%09red/mmu:…
Carbon metabolism	KEGG PATHWAY	mmu01200	75	118	0.000627748	0.00117153	18655|17436|20916|18642|18293|66925|17769|15926|72141|20917|18648|74419|14718|11409|257635|107272|75456|66052|110446|18597|110208|212032|230163|19895|56421|14751|14194|11429|11428|110639|12359|104776|17448|66171|21881|434437|235339|97212|433182|225913|67834|239017|75731|18563|14661|110460|60525|66646|14121|14120|110821|15275|15277|11674|12974|13806|78920|269951|13885|20425|109264|236539|11676|108…	http://www.genome.jp/kegg-bin/show_pathway?mmu01200/mmu:14661%09red/mmu:14718%09red/mmu:212032%09red/mmu:14751%09red/mmu:66646%09red/mmu:75731%09red/mmu:18293%09red/mmu:20916%09red/mmu:239017%09red/mmu:72141%09red/mmu:17769%09red/mmu:20425%09red/mmu:225913%09red/mmu:216019%09red/mmu:110821%09red/mmu:110639%09red/mmu:66925%09red/mmu:18648%09red/mmu:110460%09red/mmu:12359%09red/mmu:236539%09red/mmu…
Carbohydrate digestion and absorption	KEGG PATHWAY	mmu04973	37	45	0.000636448	0.00118025	67821|18707|18706|20526|320207|18709|18708|14385|74769|212032|23797|18796|30955|14377|18751|109959|11936|83770|83771|11933|11932|11931|20537|232975|100043686|100043684|100043688|18710|56485|14378|15275|15277|12289|98660|11928|216019|11652	http://www.genome.jp/kegg-bin/show_pathway?mmu04973/mmu:212032%09red/mmu:14378%09red/mmu:23797%09red/mmu:232975%09red/mmu:18708%09red/mmu:18709%09red/mmu:18706%09red/mmu:18707%09red/mmu:100043688%09red/mmu:67821%09red/mmu:14377%09red/mmu:20526%09red/mmu:320207%09red/mmu:11928%09red/mmu:216019%09red/mmu:14385%09red/mmu:98660%09red/mmu:15275%09red/mmu:15277%09red/mmu:11652%09red/mmu:83771%09red/mmu…
Mucin type O-Glycan biosynthesis	KEGG PATHWAY	mmu00512	27	28	0.000683873	0.00126022	94192|271786|71685|20444|20442|212996|20445|108760|218476|108150|67909|230145|108148|14537|56336|233733|207839|72077|78754|272411|14426|14425|14423|241391|171212|231605|270049	http://www.genome.jp/kegg-bin/show_pathway?mmu00512/mmu:14426%09red/mmu:14425%09red/mmu:14423%09red/mmu:171212%09red/mmu:241391%09red/mmu:67909%09red/mmu:108148%09red/mmu:20442%09red/mmu:20444%09red/mmu:20445%09red/mmu:94192%09red/mmu:218476%09red/mmu:71685%09red/mmu:207839%09red/mmu:230145%09red/mmu:72077%09red/mmu:272411%09red/mmu:14537%09red/mmu:212996%09red/mmu:108760%09red/mmu:108150%09red/m…
N-Glycan biosynthesis	KEGG PATHWAY	mmu00510	39	49	0.000712406	0.00130459	67569|20440|208624|102580|103963|68292|16430|20014|320302|14595|13200|240119|140481|269181|223774|57370|13481|207958|217664|67574|66789|17156|17155|17158|13478|53418|380959|268510|66248|230815|320438|107895|13135|57170|227619|103534|56737|17308|17309	http://www.genome.jp/kegg-bin/show_pathway?mmu00510/mmu:227619%09red/mmu:268510%09red/mmu:13200%09red/mmu:102580%09red/mmu:207958%09red/mmu:230815%09red/mmu:53418%09red/mmu:107895%09red/mmu:20440%09red/mmu:320302%09red/mmu:68292%09red/mmu:17155%09red/mmu:223774%09red/mmu:56737%09red/mmu:20014%09red/mmu:320438%09red/mmu:57170%09red/mmu:17158%09red/mmu:13478%09red/mmu:208624%09red/mmu:240119%09red/…
Peroxisome	KEGG PATHWAY	mmu04146	57	83	0.000724229	0.00131801	74043|20524|212503|12908|18477|26378|18634|14712|208982|113868|20656|11666|216739|234384|74205|19298|19299|111175|50790|56273|12359|18632|18631|433256|15926|330450|70503|69129|68603|17117|228061|22436|71382|67420|19193|67993|26874|58869|14081|80911|74114|17527|93732|269951|54683|59038|56794|17855|19300|19302|76263|19305|72129|11611|67528|11430|28200	http://www.genome.jp/kegg-bin/show_pathway?mmu04146/mmu:70503%09red/mmu:19299%09red/mmu:19298%09red/mmu:50790%09red/mmu:74043%09red/mmu:11430%09red/mmu:74205%09red/mmu:216739%09red/mmu:72129%09red/mmu:11666%09red/mmu:69129%09red/mmu:17527%09red/mmu:12359%09red/mmu:20524%09red/mmu:12908%09red/mmu:93732%09red/mmu:59038%09red/mmu:14081%09red/mmu:67528%09red/mmu:19300%09red/mmu:19302%09red/mmu:19305%…
Lysine degradation	KEGG PATHWAY	mmu00310	41	53	0.000781871	0.00141413	56752|74729|170442|234135|18193|214162|18293|20937|26432|73251|225888|30956|234407|11669|78920|110446|69188|110460|97212|239122|232811|239017|67956|192195|107823|19193|208043|231051|72535|110695|235386|77683|11671|269132|23923|208266|72947|235626|110147|381022|64707	http://www.genome.jp/kegg-bin/show_pathway?mmu00310/mmu:77683%09red/mmu:232811%09red/mmu:235386%09red/mmu:234407%09red/mmu:73251%09red/mmu:20937%09red/mmu:239122%09red/mmu:269132%09red/mmu:192195%09red/mmu:381022%09red/mmu:110460%09red/mmu:56752%09red/mmu:72947%09red/mmu:69188%09red/mmu:107823%09red/mmu:170442%09red/mmu:110147%09red/mmu:78920%09red/mmu:110695%09red/mmu:26432%09red/mmu:72535%09red…
Ether lipid metabolism	KEGG PATHWAY	mmu00565	36	44	0.000795648	0.00143021	104759|26565|22239|18475|18476|18606|18472|53897|270084|232889|99712|320981|19012|102238433|68255|100163|26971|228061|18778|78390|329502|28042|67916|18805|18806|18807|210992|212862|271844|237625|66350|50784|225845|18782|18781|18780	http://www.genome.jp/kegg-bin/show_pathway?mmu00565/mmu:78390%09red/mmu:270084%09red/mmu:237625%09red/mmu:100163%09red/mmu:18606%09red/mmu:68255%09red/mmu:212862%09red/mmu:210992%09red/mmu:232889%09red/mmu:18782%09red/mmu:18780%09red/mmu:18781%09red/mmu:19012%09red/mmu:53897%09red/mmu:18475%09red/mmu:320981%09red/mmu:28042%09red/mmu:50784%09red/mmu:26565%09red/mmu:22239%09red/mmu:67916%09red/mmu:…
Natural killer cell mediated cytotoxicity	KEGG PATHWAY	mmu04650	75	121	0.00104689	0.00187035	18646|12506|19247|15894|22035|18176|320207|56554|16642|18708|14972|19058|16415|26413|16822|18707|20663|26417|109880|18709|18479|18019|18018|18706|12503|19059|26396|18751|27007|170758|14964|19055|77777|18750|15976|15975|21933|110157|16641|19056|22325|15979|19353|20963|14102|19354|11836|18710|379043|14784|16653|15170|18106|16639|24055|15461|20416|16408|17059|12367|16818|26904|271849|18803|18752|141…	http://www.genome.jp/kegg-bin/show_pathway?mmu04650/mmu:16641%09red/mmu:320207%09red/mmu:16408%09red/mmu:22035%09red/mmu:12122%09red/mmu:15976%09red/mmu:14972%09red/mmu:27007%09red/mmu:271849%09red/mmu:18708%09red/mmu:18709%09red/mmu:18706%09red/mmu:18707%09red/mmu:16822%09red/mmu:21926%09red/mmu:18803%09red/mmu:15979%09red/mmu:26417%09red/mmu:19247%09red/mmu:26413%09red/mmu:379043%09red/mmu:2690…
Circadian rhythm	KEGG PATHWAY	mmu04710	28	31	0.0010777	0.00189219	19082|26965|217166|104318|19079|12753|103583|12234|241113|225998|105787|20893|108079|12952|12953|19883|12912|18143|108097|27373|56438|108099|11865|50789|18626|18627|18628|79362	http://www.genome.jp/kegg-bin/show_pathway?mmu04710/mmu:12234%09red/mmu:217166%09red/mmu:105787%09red/mmu:241113%09red/mmu:104318%09red/mmu:12753%09red/mmu:19883%09red/mmu:20893%09red/mmu:103583%09red/mmu:225998%09red/mmu:19079%09red/mmu:18627%09red/mmu:18626%09red/mmu:18628%09red/mmu:26965%09red/mmu:108079%09red/mmu:79362%09red/mmu:50789%09red/mmu:27373%09red/mmu:19082%09red/mmu:56438%09red/mmu:…
RNA degradation	KEGG PATHWAY	mmu03018	56	83	0.00107848	0.00189219	104625|18642|72068|67543|72162|72587|234594|18983|58184|93728|22057|225929|109075|24127|27998|234699|74108|50912|13806|69125|66317|56421|78893|13209|68533|69305|319618|78651|67207|70640|53621|433182|57316|231464|75686|381404|72198|230721|56057|13807|241989|227715|66094|66362|319885|218343|210106|12226|12227|50783|214627|353190|72662|232791|57259|12228	http://www.genome.jp/kegg-bin/show_pathway?mmu03018/mmu:72068%09red/mmu:53621%09red/mmu:227715%09red/mmu:234594%09red/mmu:72587%09red/mmu:210106%09red/mmu:18642%09red/mmu:13209%09red/mmu:72162%09red/mmu:70640%09red/mmu:319618%09red/mmu:230721%09red/mmu:69125%09red/mmu:58184%09red/mmu:57259%09red/mmu:13807%09red/mmu:104625%09red/mmu:66362%09red/mmu:68533%09red/mmu:241989%09red/mmu:231464%09red/mmu…
Ribosome biogenesis in eukaryotes	KEGG PATHWAY	mmu03008	56	83	0.00107848	0.00189219	67459|217109|66161|30877|14791|67619|110816|27993|195434|24127|66711|434234|237730|52530|237107|59028|67282|213895|269470|225348|67045|105372|13000|230082|216987|55989|71340|100019|245474|66932|237082|224092|74778|54364|72515|21453|12995|53319|117109|101592|104444|74097|208366|170722|21771|68147|103573|19384|97112|102216272|20826|67134|69237|213773|102614|217995	http://www.genome.jp/kegg-bin/show_pathway?mmu03008/mmu:12995%09red/mmu:53319%09red/mmu:237082%09red/mmu:73674%09red/mmu:230082%09red/mmu:217109%09red/mmu:52530%09red/mmu:67619%09red/mmu:213773%09red/mmu:67459%09red/mmu:213895%09red/mmu:68147%09red/mmu:103573%09red/mmu:66161%09red/mmu:74097%09red/mmu:208366%09red/mmu:21771%09red/mmu:105372%09red/mmu:54364%09red/mmu:101592%09red/mmu:104444%09red/m…
Glycosphingolipid biosynthesis - lacto and neolacto series	KEGG PATHWAY	mmu00601	25	26	0.00109527	0.00191021	14347|14345|14344|14343|20441|20449|14348|108105|80908|20443|14594|14595|53625|14538|56546|57370|56375|108902|26878|54613|26877|93961|53418|102637973|72297	http://www.genome.jp/kegg-bin/show_pathway?mmu00601/mmu:108902%09red/mmu:80908%09red/mmu:108105%09red/mmu:20443%09red/mmu:20441%09red/mmu:20449%09red/mmu:56546%09red/mmu:14343%09red/mmu:72297%09red/mmu:14347%09red/mmu:14344%09red/mmu:14345%09red/mmu:14348%09red/mmu:93961%09red/mmu:14538%09red/mmu:57370%09red/mmu:14595%09red/mmu:14594%09red/mmu:102637973%09red/mmu:53625%09red/mmu:54613%09red/mmu:5…
Biosynthesis of unsaturated fatty acids	KEGG PATHWAY	mmu01040	26	28	0.00122935	0.00213137	60527|113868|106529|20250|66775|171282|171281|97212|68801|30049|170439|329065|80911|57874|54326|20249|26897|30963|171210|70025|111175|70757|76267|56473|56348|11430	http://www.genome.jp/kegg-bin/show_pathway?mmu01040/mmu:11430%09red/mmu:20249%09red/mmu:66775%09red/mmu:70025%09red/mmu:329065%09red/mmu:20250%09red/mmu:106529%09red/mmu:30963%09red/mmu:56473%09red/mmu:54326%09red/mmu:56348%09red/mmu:68801%09red/mmu:171210%09red/mmu:111175%09red/mmu:70757%09red/mmu:80911%09red/mmu:30049%09red/mmu:57874%09red/mmu:76267%09red/mmu:170439%09red/mmu:113868%09red/mmu:1…
Viral myocarditis	KEGG PATHWAY	mmu05416	62	96	0.00132705	0.0022872	18646|110557|672195|15894|12487|21947|14972|15007|208643|12519|13405|15002|224761|15000|13690|20391|15043|12371|14963|13063|12443|13052|170758|15013|14964|15024|11465|11461|21939|230861|19353|12370|14961|14960|19354|14969|16773|24051|24052|24053|15018|15006|16408|110696|12367|16415|14990|15039|12389|12524|16414|11352|14998|11350|14991|15001|13136|15042|16019|12122|13138|240095	http://www.genome.jp/kegg-bin/show_pathway?mmu05416/mmu:16773%09red/mmu:16408%09red/mmu:12443%09red/mmu:21947%09red/mmu:12122%09red/mmu:12371%09red/mmu:12370%09red/mmu:14999%09red/mmu:14998%09red/mmu:18646%09red/mmu:12519%09red/mmu:16414%09red/mmu:14991%09red/mmu:14990%09red/mmu:13690%09red/mmu:13138%09red/mmu:15018%09red/mmu:13052%09red/mmu:15039%09red/mmu:15013%09red/mmu:110696%09red/mmu:14963%…
NOD-like receptor signaling pathway	KEGG PATHWAY	mmu04621	43	59	0.00136527	0.00233931	26416|22034|18033|66724|22051|15519|26413|18036|17940|26417|26414|26415|268973|26419|17948|16193|12370|20310|12675|107607|66513|66824|54483|67955|19094|29857|16151|26409|239319|26420|68652|19697|17952|17951|11797|11796|59079|21926|16176|16150|192656|637515|21929	http://www.genome.jp/kegg-bin/show_pathway?mmu04621/mmu:195046%09red/mmu:22034%09red/mmu:12370%09red/mmu:21929%09red/mmu:19697%09red/mmu:18036%09red/mmu:12675%09red/mmu:16193%09red/mmu:21926%09red/mmu:54483%09red/mmu:26417%09red/mmu:26416%09red/mmu:26415%09red/mmu:26414%09red/mmu:26413%09red/mmu:19094%09red/mmu:268973%09red/mmu:68652%09red/mmu:239319%09red/mmu:18033%09red/mmu:26419%09red/mmu:2031…
ABC transporters	KEGG PATHWAY	mmu02010	36	46	0.00137586	0.00234375	21354|18669|56325|224814|74104|26357|12638|11303|11304|11306|11307|11666|27410|19299|27416|192663|56199|17250|239273|18671|20928|244562|217262|26874|217265|74610|27421|381072|27409|268379|27404|27405|19300|74591|67470|12780	http://www.genome.jp/kegg-bin/show_pathway?mmu02010/mmu:19299%09red/mmu:27410%09red/mmu:17250%09red/mmu:27416%09red/mmu:11666%09red/mmu:11307%09red/mmu:67470%09red/mmu:239273%09red/mmu:192663%09red/mmu:244562%09red/mmu:224814%09red/mmu:21354%09red/mmu:12638%09red/mmu:11303%09red/mmu:11304%09red/mmu:74610%09red/mmu:11306%09red/mmu:19300%09red/mmu:56325%09red/mmu:26357%09red/mmu:12780%09red/mmu:274…
Bile secretion	KEGG PATHWAY	mmu04976	49	71	0.00152138	0.00257668	20537|11829|20525|67821|11826|64008|106407|20544|19879|20778|26357|12638|28248|18669|11928|28250|232156|28254|20494|20493|11936|54403|11933|11932|11931|239273|18671|232975|67470|15357|16835|320024|20517|108096|27409|98660|14683|20181|210044|105243|11513|11512|12349|224129|104111|432530|12780|11514|18749	http://www.genome.jp/kegg-bin/show_pathway?mmu04976/mmu:16835%09red/mmu:11826%09red/mmu:432530%09red/mmu:11829%09red/mmu:210044%09red/mmu:224129%09red/mmu:232975%09red/mmu:232156%09red/mmu:11513%09red/mmu:18669%09red/mmu:20544%09red/mmu:67470%09red/mmu:28250%09red/mmu:28254%09red/mmu:67821%09red/mmu:20525%09red/mmu:12638%09red/mmu:104111%09red/mmu:18749%09red/mmu:239273%09red/mmu:105243%09red/mmu…
Rheumatoid arthritis	KEGG PATHWAY	mmu05323	56	85	0.00159524	0.00268624	16476|15894|12487|338375|16415|16414|15002|15001|15000|27060|20297|11984|16193|12524|20311|20315|21898|14281|21934|110935|16168|242341|69583|11600|14961|14960|21871|21687|11972|14969|76252|24099|11975|11974|16019|12477|16408|12519|68775|73834|14254|14998|16176|12977|11964|21926|11966|21803|13038|13039|22339|16175|21808|21809|140494|54411	http://www.genome.jp/kegg-bin/show_pathway?mmu05323/mmu:11972%09red/mmu:12977%09red/mmu:11600%09red/mmu:11974%09red/mmu:16408%09red/mmu:13039%09red/mmu:13038%09red/mmu:22339%09red/mmu:21809%09red/mmu:21808%09red/mmu:14999%09red/mmu:14998%09red/mmu:24099%09red/mmu:76252%09red/mmu:12519%09red/mmu:16414%09red/mmu:16193%09red/mmu:242341%09red/mmu:21926%09red/mmu:21803%09red/mmu:11964%09red/mmu:27060%…
Vasopressin-regulated water reabsorption	KEGG PATHWAY	mmu04962	34	43	0.00163578	0.00273876	11829|11828|19344|19345|11827|18195|19326|59288|13427|13426|235661|69654|192662|213575|68097|11857|110350|231991|12912|20909|26427|14683|13191|12000|11512|78284|18749|67665|56455|22318|53869|234663|104111|208647	http://www.genome.jp/kegg-bin/show_pathway?mmu04962/mmu:13426%09red/mmu:13427%09red/mmu:234663%09red/mmu:11827%09red/mmu:14683%09red/mmu:11829%09red/mmu:20909%09red/mmu:11512%09red/mmu:192662%09red/mmu:12000%09red/mmu:13191%09red/mmu:19345%09red/mmu:19344%09red/mmu:18749%09red/mmu:56455%09red/mmu:19326%09red/mmu:22318%09red/mmu:11828%09red/mmu:68097%09red/mmu:11857%09red/mmu:78284%09red/mmu:18195…
Other types of O-glycan biosynthesis	KEGG PATHWAY	mmu00514	27	31	0.00187546	0.00312222	14347|14345|20441|20440|14348|217734|381694|14595|140484|240119|234407|16848|57370|68273|280645|98388|76898|99011|53418|232313|269132|268510|223827|224143|108155|80294|101351	http://www.genome.jp/kegg-bin/show_pathway?mmu00514/mmu:99011%09red/mmu:268510%09red/mmu:98388%09red/mmu:101351%09red/mmu:20440%09red/mmu:20441%09red/mmu:280645%09red/mmu:234407%09red/mmu:14347%09red/mmu:14345%09red/mmu:14348%09red/mmu:80294%09red/mmu:240119%09red/mmu:223827%09red/mmu:57370%09red/mmu:68273%09red/mmu:232313%09red/mmu:14595%09red/mmu:76898%09red/mmu:140484%09red/mmu:381694%09red/mm…
Non-alcoholic fatty liver disease (NAFLD)	KEGG PATHWAY	mmu04932	90	157	0.00210549	0.00348535	16476|67273|56637|16846|16847|19013|66377|67264|14102|208104|12702|26408|17995|230075|17993|17991|22272|22273|16176|66576|672195|66414|12859|69875|26414|26419|12857|66091|78330|19079|241113|58805|19353|12370|105787|108079|78943|16175|70316|26420|20181|21926|16396|16150|12122|12125|22030|66046|16334|16337|19697|23797|68465|72674|66052|22433|108097|226646|108099|67130|384783|19082|18707|18706|66925…	http://www.genome.jp/kegg-bin/show_pathway?mmu04932/mmu:226646%09red/mmu:241113%09red/mmu:19697%09red/mmu:21926%09red/mmu:66576%09red/mmu:78943%09red/mmu:13063%09red/mmu:16367%09red/mmu:12367%09red/mmu:19353%09red/mmu:16847%09red/mmu:16846%09red/mmu:66377%09red/mmu:16175%09red/mmu:20181%09red/mmu:67273%09red/mmu:68198%09red/mmu:72674%09red/mmu:23797%09red/mmu:12125%09red/mmu:12122%09red/mmu:16193…
Alzheimer's disease	KEGG PATHWAY	mmu05010	99	177	0.00231533	0.0038112	17762|208117|67273|53313|11820|56637|11785|70405|11783|12370|12371|18796|18797|18798|66377|67264|14102|494124|17995|230075|17993|17991|16971|22272|22273|16176|66576|672195|67942|15925|66414|12859|26413|69875|26417|17380|59287|12857|66091|78943|20192|78330|19059|68318|12315|12313|11938|11937|12569|54652|70316|11951|11950|16956|19165|14682|21926|12122|66046|16439|16438|18795|19058|12568|19055|19056…	http://www.genome.jp/kegg-bin/show_pathway?mmu05010/mmu:11820%09red/mmu:226646%09red/mmu:226641%09red/mmu:17762%09red/mmu:21926%09red/mmu:14082%09red/mmu:19055%09red/mmu:19056%09red/mmu:66576%09red/mmu:78943%09red/mmu:19059%09red/mmu:13063%09red/mmu:12333%09red/mmu:66916%09red/mmu:66377%09red/mmu:11938%09red/mmu:11937%09red/mmu:67273%09red/mmu:14814%09red/mmu:14812%09red/mmu:14813%09red/mmu:12122…
Ovarian steroidogenesis	KEGG PATHWAY	mmu04913	41	58	0.00258987	0.00423929	329502|16334|16337|13110|20845|230459|14309|232889|11689|102238433|16867|19225|16000|16001|12161|78390|15493|15486|15485|14566|16835|224129|13075|14683|13076|271844|210044|171210|11513|11512|13078|15496|15497|15490|104111|15492|432530|11514|242546|18749|20778	http://www.genome.jp/kegg-bin/show_pathway?mmu04913/mmu:13110%09red/mmu:78390%09red/mmu:432530%09red/mmu:15490%09red/mmu:210044%09red/mmu:171210%09red/mmu:20778%09red/mmu:12161%09red/mmu:11512%09red/mmu:11513%09red/mmu:11514%09red/mmu:11689%09red/mmu:16334%09red/mmu:16337%09red/mmu:232889%09red/mmu:104111%09red/mmu:18749%09red/mmu:14683%09red/mmu:15493%09red/mmu:15492%09red/mmu:15497%09red/mmu:19…
RIG-I-like receptor signaling pathway	KEGG PATHWAY	mmu04622	46	69	0.0033593	0.0054682	22030|22031|54644|217069|22034|18033|100038882|71609|15945|19697|18036|26416|26414|26415|26419|54131|12370|13205|12675|270151|16160|19766|110957|225913|56489|67664|19094|56480|29857|26401|74256|14082|23988|26409|26420|54123|228607|66641|230073|11793|21926|27215|67526|16150|16151|73174	http://www.genome.jp/kegg-bin/show_pathway?mmu04622/mmu:217069%09red/mmu:22031%09red/mmu:22030%09red/mmu:71609%09red/mmu:22034%09red/mmu:13205%09red/mmu:12370%09red/mmu:225913%09red/mmu:19697%09red/mmu:18036%09red/mmu:54644%09red/mmu:12675%09red/mmu:21926%09red/mmu:73174%09red/mmu:26416%09red/mmu:26415%09red/mmu:26414%09red/mmu:19094%09red/mmu:23988%09red/mmu:18033%09red/mmu:26419%09red/mmu:14082…
Basal transcription factors	KEGG PATHWAY	mmu03022	33	44	0.00341311	0.00550021	23894|13871|13872|63856|72504|66671|99730|14884|270627|14885|14886|21374|237336|209361|66467|226182|319944|21343|70439|74197|209357|228980|57080|229906|17420|66464|407786|68776|12572|24074|24075|225895|83602	http://www.genome.jp/kegg-bin/show_pathway?mmu03022/mmu:228980%09red/mmu:12572%09red/mmu:237336%09red/mmu:83602%09red/mmu:17420%09red/mmu:63856%09red/mmu:225895%09red/mmu:226182%09red/mmu:66671%09red/mmu:68776%09red/mmu:21374%09red/mmu:209361%09red/mmu:24075%09red/mmu:24074%09red/mmu:270627%09red/mmu:319944%09red/mmu:74197%09red/mmu:70439%09red/mmu:14885%09red/mmu:14884%09red/mmu:14886%09red/mmu:…
SNARE interactions in vesicular transport	KEGG PATHWAY	mmu04130	27	33	0.00341651	0.00550021	13852|20619|67727|56494|58244|53620|56389|68159|20333|71116|53334|20907|53612|53331|74732|56216|20908|20909|55943|228960|56418|54399|67474|22317|53330|22319|22318	http://www.genome.jp/kegg-bin/show_pathway?mmu04130/mmu:53612%09red/mmu:53330%09red/mmu:53331%09red/mmu:53334%09red/mmu:55943%09red/mmu:56389%09red/mmu:67474%09red/mmu:58244%09red/mmu:228960%09red/mmu:20333%09red/mmu:56418%09red/mmu:74732%09red/mmu:71116%09red/mmu:56494%09red/mmu:20909%09red/mmu:20908%09red/mmu:20907%09red/mmu:68159%09red/mmu:13852%09red/mmu:67727%09red/mmu:53620%09red/mmu:20619%…
Huntington's disease	KEGG PATHWAY	mmu05016	107	199	0.00401706	0.00643169	105675|67273|19712|245841|11783|21374|12370|12371|18796|18797|71770|18798|69654|56087|66377|67264|13411|13417|15114|12064|15194|17995|230075|17993|17991|20683|22272|22273|328572|66576|110084|11773|11772|110082|672195|67942|433759|66414|237806|69875|66491|12857|105000|69241|15182|74325|78330|13385|18795|70316|12912|66420|11951|19016|11950|11771|19017|26427|14682|20021|20022|228980|67665|66046|7250…	http://www.genome.jp/kegg-bin/show_pathway?mmu05016/mmu:228980%09red/mmu:18181%09red/mmu:226646%09red/mmu:237336%09red/mmu:73333%09red/mmu:13191%09red/mmu:54152%09red/mmu:433759%09red/mmu:20021%09red/mmu:20022%09red/mmu:66576%09red/mmu:13063%09red/mmu:69241%09red/mmu:231991%09red/mmu:328572%09red/mmu:66377%09red/mmu:232910%09red/mmu:67273%09red/mmu:14812%09red/mmu:14810%09red/mmu:74325%09red/mmu:…
Glycolysis / Gluconeogenesis	KEGG PATHWAY	mmu00010	44	66	0.0040604	0.00646574	74551|56752|60525|72141|18648|11522|16828|18642|11529|212032|230163|110695|56421|14751|11669|18597|235339|73458|17330|18655|56847|66681|14121|14120|14378|16833|15275|15277|72535|13807|13806|12183|14377|11670|11671|11674|11676|103988|216019|319625|68738|58810|621603|433182	http://www.genome.jp/kegg-bin/show_pathway?mmu00010/mmu:212032%09red/mmu:14751%09red/mmu:235339%09red/mmu:17330%09red/mmu:72141%09red/mmu:58810%09red/mmu:18642%09red/mmu:18648%09red/mmu:56752%09red/mmu:11669%09red/mmu:13807%09red/mmu:60525%09red/mmu:14121%09red/mmu:16833%09red/mmu:110695%09red/mmu:68738%09red/mmu:230163%09red/mmu:216019%09red/mmu:73458%09red/mmu:621603%09red/mmu:14120%09red/mmu:7…
Fatty acid elongation	KEGG PATHWAY	mmu00062	23	27	0.00475389	0.00752913	74559|52538|106529|231086|66775|171282|171281|97212|68801|170439|57874|83603|54325|54326|26897|19063|30963|12686|171210|70025|70757|56348|54397	http://www.genome.jp/kegg-bin/show_pathway?mmu00062/mmu:171210%09red/mmu:83603%09red/mmu:66775%09red/mmu:106529%09red/mmu:30963%09red/mmu:54325%09red/mmu:54326%09red/mmu:56348%09red/mmu:68801%09red/mmu:70757%09red/mmu:52538%09red/mmu:70025%09red/mmu:12686%09red/mmu:57874%09red/mmu:231086%09red/mmu:170439%09red/mmu:54397%09red/mmu:171281%09red/mmu:171282%09red/mmu:19063%09red/mmu:74559%09red/mmu:9…
Alcoholism	KEGG PATHWAY	mmu05034	108	204	0.00547482	0.00862431	14679|14678|14677|18767|11540|17161|13489|13488|13162|63959|110157|494124|11836|12064|77605|271849|11909|18176|433759|109648|214084|26417|109880|14695|232440|15184|14696|15182|15183|14699|12315|12313|14813|18610|12912|16653|320332|12915|26427|70315|15270|14683|19049|14681|19047|19046|19045|14688|14282|242443|224129|12326|319184|110877|319180|319182|70405|21823|15081|18212|319164|319162|97122|4046…	http://www.genome.jp/kegg-bin/show_pathway?mmu05034/mmu:17161%09red/mmu:319190%09red/mmu:13195%09red/mmu:18212%09red/mmu:433759%09red/mmu:14681%09red/mmu:15078%09red/mmu:14708%09red/mmu:224129%09red/mmu:14702%09red/mmu:14700%09red/mmu:14701%09red/mmu:14706%09red/mmu:14707%09red/mmu:14704%09red/mmu:208727%09red/mmu:319186%09red/mmu:319184%09red/mmu:319180%09red/mmu:231991%09red/mmu:232440%09red/mm…
Terpenoid backbone biosynthesis	KEGG PATHWAY	mmu00900	21	24	0.00556711	0.0087228	71365|57295|14593|66881|320581|15360|17855|208715|192156|52014|15357|14272|56075|110606|230709|319554|19671|110446|110460|68603|67422	http://www.genome.jp/kegg-bin/show_pathway?mmu00900/mmu:14593%09red/mmu:56075%09red/mmu:14272%09red/mmu:15360%09red/mmu:57295%09red/mmu:192156%09red/mmu:208715%09red/mmu:15357%09red/mmu:52014%09red/mmu:68603%09red/mmu:71365%09red/mmu:110446%09red/mmu:230709%09red/mmu:67422%09red/mmu:19671%09red/mmu:66881%09red/mmu:320581%09red/mmu:110606%09red/mmu:319554%09red/mmu:17855%09red/mmu:110460%09red
Starch and sucrose metabolism	KEGG PATHWAY	mmu00500	37	54	0.00583074	0.00908726	110006|22236|74185|243085|18605|110078|70974|212032|394436|14751|67883|77559|109959|216558|58866|100043686|66681|100043684|613123|14387|100043688|14378|15275|15277|14377|100727|209558|103988|94284|216019|394435|394434|394433|394432|14936|394430|76051	http://www.genome.jp/kegg-bin/show_pathway?mmu00500/mmu:212032%09red/mmu:14751%09red/mmu:14936%09red/mmu:74185%09red/mmu:243085%09red/mmu:94284%09red/mmu:100043688%09red/mmu:77559%09red/mmu:18605%09red/mmu:70974%09red/mmu:110006%09red/mmu:100727%09red/mmu:76051%09red/mmu:67883%09red/mmu:216019%09red/mmu:14387%09red/mmu:209558%09red/mmu:103988%09red/mmu:15275%09red/mmu:15277%09red/mmu:58866%09red/…
Nicotinate and nicotinamide metabolism	KEGG PATHWAY	mmu00760	27	35	0.00590972	0.00916163	78914|67375|107569|18605|18115|18113|23959|18950|74080|68646|59027|11872|70881|67993|50773|69564|12494|71724|68106|12182|209558|192185|76952|66763|66454|225994|226518	http://www.genome.jp/kegg-bin/show_pathway?mmu00760/mmu:23959%09red/mmu:12494%09red/mmu:67375%09red/mmu:18950%09red/mmu:18605%09red/mmu:71724%09red/mmu:68106%09red/mmu:225994%09red/mmu:18115%09red/mmu:107569%09red/mmu:69564%09red/mmu:18113%09red/mmu:11872%09red/mmu:66454%09red/mmu:76952%09red/mmu:74080%09red/mmu:192185%09red/mmu:66763%09red/mmu:50773%09red/mmu:226518%09red/mmu:59027%09red/mmu:209…
Dorso-ventral axis formation	KEGG PATHWAY	mmu04320	22	26	0.00600463	0.00925977	12877|14011|26413|54418|26417|109880|18131|18132|23872|23871|18128|231207|67579|208922|14784|68166|20663|18129|330890|13649|57749|57746	http://www.genome.jp/kegg-bin/show_pathway?mmu04320/mmu:23872%09red/mmu:14011%09red/mmu:208922%09red/mmu:26417%09red/mmu:57749%09red/mmu:68166%09red/mmu:26413%09red/mmu:330890%09red/mmu:23871%09red/mmu:57746%09red/mmu:18131%09red/mmu:18132%09red/mmu:14784%09red/mmu:20663%09red/mmu:109880%09red/mmu:67579%09red/mmu:18129%09red/mmu:12877%09red/mmu:231207%09red/mmu:18128%09red/mmu:13649%09red/mmu:544…
Primary immunodeficiency	KEGG PATHWAY	mmu05340	28	37	0.00613174	0.00940627	21947|21354|16197|12525|12501|12500|12504|53970|21939|11628|54167|19374|19373|19727|12526|109305|16818|12518|57916|227525|12478|170767|11634|16151|12229|72049|22256|12265	http://www.genome.jp/kegg-bin/show_pathway?mmu05340/mmu:22256%09red/mmu:11628%09red/mmu:227525%09red/mmu:21947%09red/mmu:12518%09red/mmu:72049%09red/mmu:16197%09red/mmu:12478%09red/mmu:53970%09red/mmu:16818%09red/mmu:21354%09red/mmu:11634%09red/mmu:12229%09red/mmu:12525%09red/mmu:12526%09red/mmu:21939%09red/mmu:12500%09red/mmu:12501%09red/mmu:12504%09red/mmu:170767%09red/mmu:19374%09red/mmu:57916…
Complement and coagulation cascades	KEGG PATHWAY	mmu04610	53	87	0.00666542	0.0101717	317677|21788|15160|22371|16644|12902|21824|16415|16414|14058|16411|12061|230558|12062|16621|18791|18792|18793|12509|12258|12279|18788|50909|12273|14061|18816|22789|17221|385643|110135|17175|17174|15139|99571|14067|333883|14065|14062|14060|16409|19128|14064|74145|12630|19123|12274|12268|13136|110382|11905|12263|18787|12267	http://www.genome.jp/kegg-bin/show_pathway?mmu04610/mmu:12279%09red/mmu:14058%09red/mmu:16409%09red/mmu:22371%09red/mmu:12274%09red/mmu:12061%09red/mmu:50909%09red/mmu:12062%09red/mmu:12258%09red/mmu:21824%09red/mmu:18816%09red/mmu:16415%09red/mmu:12630%09red/mmu:19128%09red/mmu:12902%09red/mmu:19123%09red/mmu:18787%09red/mmu:16621%09red/mmu:11905%09red/mmu:317677%09red/mmu:110382%09red/mmu:15139…
PPAR signaling pathway	KEGG PATHWAY	mmu03320	52	85	0.00673884	0.0102305	74551|17436|78625|103968|12895|12894|12896|16202|666168|60527|11520|113868|14077|50790|19016|216739|19013|74205|20250|93732|11814|26457|12140|66113|57435|433256|18830|94180|14626|30049|108078|329065|11832|18607|14081|16592|57875|16956|13119|20249|20182|26569|20181|80911|104086|14933|13117|100134861|56473|11430|13118|15360	http://www.genome.jp/kegg-bin/show_pathway?mmu03320/mmu:666168%09red/mmu:13117%09red/mmu:12896%09red/mmu:14077%09red/mmu:50790%09red/mmu:13118%09red/mmu:11430%09red/mmu:74205%09red/mmu:14933%09red/mmu:216739%09red/mmu:18830%09red/mmu:104086%09red/mmu:26457%09red/mmu:12894%09red/mmu:12140%09red/mmu:329065%09red/mmu:12895%09red/mmu:18607%09red/mmu:78625%09red/mmu:20250%09red/mmu:57435%09red/mmu:140…
Tryptophan metabolism	KEGG PATHWAY	mmu00380	33	47	0.00689653	0.0104159	70266|56752|18293|17161|14204|21990|107766|100470|110695|11669|110446|12359|23923|56720|216343|97212|15930|239017|109731|71724|110460|266645|98256|229905|72535|70789|11671|209176|13076|13078|13195|71562|11298	http://www.genome.jp/kegg-bin/show_pathway?mmu00380/mmu:70266%09red/mmu:17161%09red/mmu:15930%09red/mmu:11669%09red/mmu:12359%09red/mmu:13195%09red/mmu:56752%09red/mmu:71724%09red/mmu:110695%09red/mmu:72535%09red/mmu:97212%09red/mmu:209176%09red/mmu:100470%09red/mmu:71562%09red/mmu:18293%09red/mmu:21990%09red/mmu:266645%09red/mmu:107766%09red/mmu:11671%09red/mmu:98256%09red/mmu:239017%09red/mmu:2…
Amino sugar and nucleotide sugar metabolism	KEGG PATHWAY	mmu00520	34	49	0.00698971	0.0105025	67311|266690|212032|227620|14430|216019|14751|234730|19703|72017|216558|94181|29858|66681|110119|56174|67980|50798|109754|15275|15277|22122|14584|54128|14583|331026|54342|12763|103988|320635|12764|67883|26384|230582	http://www.genome.jp/kegg-bin/show_pathway?mmu00520/mmu:50798%09red/mmu:212032%09red/mmu:14751%09red/mmu:109754%09red/mmu:14583%09red/mmu:14584%09red/mmu:26384%09red/mmu:320635%09red/mmu:54342%09red/mmu:67980%09red/mmu:14430%09red/mmu:67883%09red/mmu:216019%09red/mmu:227620%09red/mmu:19703%09red/mmu:230582%09red/mmu:331026%09red/mmu:103988%09red/mmu:15275%09red/mmu:216558%09red/mmu:15277%09red/mm…
Arachidonic acid metabolism	KEGG PATHWAY	mmu00590	54	90	0.00772657	0.0115504	329502|237625|69590|13110|71519|666168|13117|230459|14598|232889|11689|11688|11684|11687|13118|226143|243881|56351|109857|170716|69888|13106|66350|21391|26971|18778|96979|75512|23887|54486|64292|78390|67305|19215|19223|14780|13119|13088|13095|13099|271844|13097|13094|26565|13090|19225|19224|225845|433247|102238433|18782|18781|18780|242546	http://www.genome.jp/kegg-bin/show_pathway?mmu00590/mmu:13110%09red/mmu:78390%09red/mmu:666168%09red/mmu:13117%09red/mmu:75512%09red/mmu:13118%09red/mmu:13119%09red/mmu:237625%09red/mmu:226143%09red/mmu:11688%09red/mmu:11689%09red/mmu:13099%09red/mmu:11684%09red/mmu:13095%09red/mmu:54486%09red/mmu:96979%09red/mmu:13097%09red/mmu:13090%09red/mmu:21391%09red/mmu:211429%09red/mmu:11687%09red/mmu:170…
Glycosaminoglycan biosynthesis - chondroitin sulfate / dermatan sulfate	KEGG PATHWAY	mmu00532	18	20	0.00823038	0.0122411	217119|212898|77590|233781|53374|78752|234356|338362|59031|269941|218271|74241|100910|78923|58250|72136|72727|117592	http://www.genome.jp/kegg-bin/show_pathway?mmu00532/mmu:59031%09red/mmu:212898%09red/mmu:58250%09red/mmu:218271%09red/mmu:53374%09red/mmu:217119%09red/mmu:117592%09red/mmu:78923%09red/mmu:78752%09red/mmu:74241%09red/mmu:233781%09red/mmu:338362%09red/mmu:100910%09red/mmu:234356%09red/mmu:72727%09red/mmu:77590%09red/mmu:269941%09red/mmu:72136%09red
Nucleotide excision repair	KEGG PATHWAY	mmu03420	31	44	0.00836013	0.0123713	19718|23894|13870|72584|13872|66671|71991|99375|67967|26370|18971|14884|14885|13871|66467|68275|59001|106344|19359|19358|22591|72151|209357|19687|66979|17420|319955|56438|12572|19891|50505	http://www.genome.jp/kegg-bin/show_pathway?mmu03420/mmu:12572%09red/mmu:71991%09red/mmu:22591%09red/mmu:72584%09red/mmu:319955%09red/mmu:18971%09red/mmu:17420%09red/mmu:66979%09red/mmu:68275%09red/mmu:56438%09red/mmu:99375%09red/mmu:67967%09red/mmu:19718%09red/mmu:50505%09red/mmu:72151%09red/mmu:26370%09red/mmu:19687%09red/mmu:19891%09red/mmu:13870%09red/mmu:14885%09red/mmu:14884%09red/mmu:13871%…
Thyroid cancer	KEGG PATHWAY	mmu05216	23	29	0.00849637	0.0125097	18176|19713|26413|26417|109880|22059|19016|12443|59069|21787|26396|76551|16653|12550|27057|15461|20182|21416|21415|21414|12387|20181|18510	http://www.genome.jp/kegg-bin/show_pathway?mmu05216/mmu:12550%09red/mmu:26417%09red/mmu:26413%09red/mmu:18176%09red/mmu:21416%09red/mmu:21414%09red/mmu:21415%09red/mmu:19713%09red/mmu:19016%09red/mmu:109880%09red/mmu:12387%09red/mmu:27057%09red/mmu:59069%09red/mmu:76551%09red/mmu:26396%09red/mmu:18510%09red/mmu:12443%09red/mmu:21787%09red/mmu:22059%09red/mmu:20182%09red/mmu:20181%09red/mmu:15461%…
Proximal tubule bicarbonate reclamation	KEGG PATHWAY	mmu04964	19	22	0.00894899	0.0131103	67821|74551|54403|232975|27376|105243|14660|14661|11826|76257|11932|12349|216456|11936|98660|12351|11933|11928|11931	http://www.genome.jp/kegg-bin/show_pathway?mmu04964/mmu:14661%09red/mmu:12349%09red/mmu:67821%09red/mmu:54403%09red/mmu:11826%09red/mmu:14660%09red/mmu:216456%09red/mmu:232975%09red/mmu:105243%09red/mmu:11936%09red/mmu:76257%09red/mmu:11928%09red/mmu:12351%09red/mmu:74551%09red/mmu:98660%09red/mmu:27376%09red/mmu:11932%09red/mmu:11933%09red/mmu:11931%09red
Glycosaminoglycan biosynthesis - heparan sulfate / heparin	KEGG PATHWAY	mmu00534	20	24	0.00959353	0.0139846	83398|50785|64580|217119|233781|14042|15531|14043|58193|23908|54710|56219|54616|50786|15478|195646|117592|17423|218271|72727	http://www.genome.jp/kegg-bin/show_pathway?mmu00534/mmu:58193%09red/mmu:83398%09red/mmu:72727%09red/mmu:218271%09red/mmu:195646%09red/mmu:14043%09red/mmu:14042%09red/mmu:217119%09red/mmu:23908%09red/mmu:50785%09red/mmu:50786%09red/mmu:15478%09red/mmu:117592%09red/mmu:64580%09red/mmu:17423%09red/mmu:56219%09red/mmu:233781%09red/mmu:54710%09red/mmu:54616%09red/mmu:15531%09red
Phototransduction	KEGG PATHWAY	mmu04744	21	26	0.0101665	0.0147464	14686|214111|14919|19739|12315|12788|14913|333329|212541|14699|14918|14688|24013|18588|225600|12313|14685|70405|494124|245650|80796	http://www.genome.jp/kegg-bin/show_pathway?mmu04744/mmu:225600%09red/mmu:12313%09red/mmu:14688%09red/mmu:19739%09red/mmu:214111%09red/mmu:14919%09red/mmu:14918%09red/mmu:14686%09red/mmu:70405%09red/mmu:80796%09red/mmu:14913%09red/mmu:14685%09red/mmu:212541%09red/mmu:245650%09red/mmu:12788%09red/mmu:24013%09red/mmu:333329%09red/mmu:494124%09red/mmu:18588%09red/mmu:14699%09red
Fatty acid degradation	KEGG PATHWAY	mmu00071	33	49	0.0105692	0.015255	78625|56752|12895|12894|12896|666168|52538|11409|11522|113868|11529|231086|216739|74205|66885|11669|50790|110446|433256|97212|94180|110460|14081|80911|72535|110695|13119|11671|13117|100134861|11430|13118|13177	http://www.genome.jp/kegg-bin/show_pathway?mmu00071/mmu:666168%09red/mmu:12895%09red/mmu:12896%09red/mmu:50790%09red/mmu:13118%09red/mmu:11430%09red/mmu:74205%09red/mmu:216739%09red/mmu:12894%09red/mmu:11669%09red/mmu:13117%09red/mmu:56752%09red/mmu:78625%09red/mmu:14081%09red/mmu:110695%09red/mmu:72535%09red/mmu:97212%09red/mmu:13119%09red/mmu:231086%09red/mmu:52538%09red/mmu:11671%09red/mmu:809…
Legionellosis	KEGG PATHWAY	mmu05134	37	58	0.0128214	0.018415	672195|66824|19324|16415|19697|17940|18033|11783|268973|17948|330122|16193|12370|12371|20310|13063|20333|21898|56422|16160|76308|67160|15482|66397|17874|53791|16409|12367|20224|94044|17952|17951|12369|21926|16176|16414|15499	http://www.genome.jp/kegg-bin/show_pathway?mmu05134/mmu:67160%09red/mmu:18033%09red/mmu:16409%09red/mmu:12371%09red/mmu:12370%09red/mmu:19697%09red/mmu:16193%09red/mmu:56422%09red/mmu:21926%09red/mmu:66824%09red/mmu:330122%09red/mmu:268973%09red/mmu:20333%09red/mmu:20310%09red/mmu:19324%09red/mmu:16160%09red/mmu:11783%09red/mmu:15499%09red/mmu:17951%09red/mmu:13063%09red/mmu:16414%09red/mmu:16415…
Endocrine and other factor-regulated calcium reabsorption	KEGG PATHWAY	mmu04961	35	54	0.0129149	0.0184589	67821|103967|13429|20541|18795|18796|18797|74325|18798|18750|18751|18752|11936|11933|11932|11931|232975|232910|11771|67972|98660|12062|11773|194352|14682|14683|13982|11512|11928|12307|71770|22337|53869|11772|18749	http://www.genome.jp/kegg-bin/show_pathway?mmu04961/mmu:22337%09red/mmu:14683%09red/mmu:14682%09red/mmu:13429%09red/mmu:20541%09red/mmu:13982%09red/mmu:12062%09red/mmu:74325%09red/mmu:67821%09red/mmu:194352%09red/mmu:18749%09red/mmu:11928%09red/mmu:12307%09red/mmu:98660%09red/mmu:11771%09red/mmu:11772%09red/mmu:11773%09red/mmu:103967%09red/mmu:11936%09red/mmu:232975%09red/mmu:71770%09red/mmu:1875…
Biosynthesis of amino acids	KEGG PATHWAY	mmu01230	47	79	0.0136406	0.0194015	108645|18642|18478|15926|18648|74419|75456|257635|14718|107272|13807|230163|56421|66194|110639|12035|11429|11428|209027|11720|433182|18655|109652|67834|14645|18563|66646|238505|232087|56454|11674|12974|13806|110695|269951|20425|236539|23923|11676|108682|12411|21881|19895|217214|69051|18416|76282	http://www.genome.jp/kegg-bin/show_pathway?mmu01230/mmu:21881%09red/mmu:14718%09red/mmu:14645%09red/mmu:11720%09red/mmu:66194%09red/mmu:20425%09red/mmu:108682%09red/mmu:110639%09red/mmu:18648%09red/mmu:12411%09red/mmu:11429%09red/mmu:238505%09red/mmu:269951%09red/mmu:13807%09red/mmu:217214%09red/mmu:56454%09red/mmu:110695%09red/mmu:18563%09red/mmu:236539%09red/mmu:230163%09red/mmu:107272%09red/mm…
beta-Alanine metabolism	KEGG PATHWAY	mmu00410	24	33	0.0146965	0.0208023	56752|20603|72535|107239|103149|14415|11669|104776|73458|73748|97212|11670|66054|268860|56847|20810|14417|110695|99586|11671|11754|338403|228608|621603	http://www.genome.jp/kegg-bin/show_pathway?mmu00410/mmu:338403%09red/mmu:20810%09red/mmu:11669%09red/mmu:107239%09red/mmu:56752%09red/mmu:104776%09red/mmu:20603%09red/mmu:110695%09red/mmu:72535%09red/mmu:97212%09red/mmu:73458%09red/mmu:621603%09red/mmu:14417%09red/mmu:14415%09red/mmu:73748%09red/mmu:11671%09red/mmu:11670%09red/mmu:11754%09red/mmu:268860%09red/mmu:103149%09red/mmu:66054%09red/mmu:…
DNA replication	KEGG PATHWAY	mmu03030	25	35	0.0149922	0.0211188	19718|19819|59001|14156|67967|19076|18971|327762|17215|17216|17217|68275|17218|17219|106344|72151|19687|66979|18969|18968|381760|67153|68209|69724|19891	http://www.genome.jp/kegg-bin/show_pathway?mmu03030/mmu:17215%09red/mmu:17217%09red/mmu:17216%09red/mmu:14156%09red/mmu:17219%09red/mmu:17218%09red/mmu:18971%09red/mmu:69724%09red/mmu:67967%09red/mmu:68275%09red/mmu:19076%09red/mmu:72151%09red/mmu:19718%09red/mmu:66979%09red/mmu:381760%09red/mmu:19819%09red/mmu:67153%09red/mmu:19687%09red/mmu:19891%09red/mmu:68209%09red/mmu:18968%09red/mmu:18969%…
Arginine and proline metabolism	KEGG PATHWAY	mmu00330	33	51	0.0157045	0.0219554	67432|56752|18452|18451|17161|20603|56189|66988|12716|12715|14718|107239|66194|11669|18242|209027|20810|228608|18263|11702|66054|109731|18127|18125|72535|110695|11671|212647|19125|338403|320452|69051|56454	http://www.genome.jp/kegg-bin/show_pathway?mmu00330/mmu:338403%09red/mmu:14718%09red/mmu:17161%09red/mmu:20810%09red/mmu:66988%09red/mmu:66194%09red/mmu:11702%09red/mmu:67432%09red/mmu:11669%09red/mmu:56752%09red/mmu:19125%09red/mmu:12716%09red/mmu:12715%09red/mmu:56454%09red/mmu:56189%09red/mmu:20603%09red/mmu:110695%09red/mmu:320452%09red/mmu:72535%09red/mmu:18242%09red/mmu:107239%09red/mmu:228…
Cysteine and methionine metabolism	KEGG PATHWAY	mmu00270	32	49	0.015736	0.0219554	22117|108645|232087|14854|66902|16828|257635|14718|14630|14204|12116|100470|74340|12035|13435|12583|11720|20810|64918|11702|20603|229709|17448|14629|67873|238505|16833|329008|104923|13436|12411|67870	http://www.genome.jp/kegg-bin/show_pathway?mmu00270/mmu:14718%09red/mmu:11720%09red/mmu:17448%09red/mmu:20810%09red/mmu:22117%09red/mmu:11702%09red/mmu:14854%09red/mmu:66902%09red/mmu:12411%09red/mmu:238505%09red/mmu:229709%09red/mmu:16833%09red/mmu:20603%09red/mmu:14204%09red/mmu:100470%09red/mmu:14630%09red/mmu:13435%09red/mmu:13436%09red/mmu:108645%09red/mmu:12116%09red/mmu:67873%09red/mmu:678…
Histidine metabolism	KEGG PATHWAY	mmu00340	20	26	0.0168352	0.0233778	11670|11671|67383|56752|56847|71761|17161|66054|13195|73458|338403|11669|243537|15109|621603|72535|11484|110695|107239|109731	http://www.genome.jp/kegg-bin/show_pathway?mmu00340/mmu:338403%09red/mmu:73458%09red/mmu:621603%09red/mmu:17161%09red/mmu:71761%09red/mmu:66054%09red/mmu:56752%09red/mmu:107239%09red/mmu:67383%09red/mmu:11671%09red/mmu:11670%09red/mmu:110695%09red/mmu:109731%09red/mmu:243537%09red/mmu:72535%09red/mmu:11484%09red/mmu:11669%09red/mmu:56847%09red/mmu:15109%09red/mmu:13195%09red
Steroid biosynthesis	KEGG PATHWAY	mmu00100	16	19	0.0183514	0.0252439	13595|13081|16987|16889|223920|14137|20775|235293|15490|13115|13121|13360|66234|20652|74754|73166	http://www.genome.jp/kegg-bin/show_pathway?mmu00100/mmu:13360%09red/mmu:14137%09red/mmu:16987%09red/mmu:13121%09red/mmu:13115%09red/mmu:235293%09red/mmu:13595%09red/mmu:15490%09red/mmu:16889%09red/mmu:74754%09red/mmu:20775%09red/mmu:223920%09red/mmu:66234%09red/mmu:20652%09red/mmu:13081%09red/mmu:73166%09red
One carbon pool by folate	KEGG PATHWAY	mmu00670	16	19	0.0183514	0.0252439	665563|108147|17768|17769|14450|270685|216188|20425|107747|238505|22171|107885|13361|434437|69606|108156	http://www.genome.jp/kegg-bin/show_pathway?mmu00670/mmu:238505%09red/mmu:434437%09red/mmu:107885%09red/mmu:665563%09red/mmu:17768%09red/mmu:107747%09red/mmu:69606%09red/mmu:17769%09red/mmu:20425%09red/mmu:108147%09red/mmu:108156%09red/mmu:216188%09red/mmu:13361%09red/mmu:22171%09red/mmu:14450%09red/mmu:270685%09red
alpha-Linolenic acid metabolism	KEGG PATHWAY	mmu00592	19	25	0.0211452	0.0289511	232889|26971|18778|237625|329502|271844|102238433|78390|26565|66350|80911|60527|225845|113868|56473|18782|11430|18780|18781	http://www.genome.jp/kegg-bin/show_pathway?mmu00592/mmu:11430%09red/mmu:329502%09red/mmu:78390%09red/mmu:18780%09red/mmu:232889%09red/mmu:113868%09red/mmu:26971%09red/mmu:225845%09red/mmu:80911%09red/mmu:66350%09red/mmu:18778%09red/mmu:237625%09red/mmu:56473%09red/mmu:271844%09red/mmu:18782%09red/mmu:26565%09red/mmu:18781%09red/mmu:211429%09red
Maturity onset diabetes of the young	KEGG PATHWAY	mmu04950	20	27	0.021775	0.0295374	15205|15379|18609|16334|20526|320995|15378|21405|15874|15242|378435|18096|17341|18012|21410|103988|15285|18508|26424|11925	http://www.genome.jp/kegg-bin/show_pathway?mmu04950/mmu:15285%09red/mmu:15242%09red/mmu:15874%09red/mmu:18508%09red/mmu:26424%09red/mmu:20526%09red/mmu:15378%09red/mmu:15379%09red/mmu:103988%09red/mmu:18096%09red/mmu:18609%09red/mmu:21405%09red/mmu:320995%09red/mmu:21410%09red/mmu:11925%09red/mmu:15205%09red/mmu:17341%09red/mmu:378435%09red/mmu:16334%09red/mmu:18012%09red
Collecting duct acid secretion	KEGG PATHWAY	mmu04966	20	27	0.021775	0.0295374	11964|21871|140494|73834|11972|11944|76252|11975|338375|12349|11966|20533|110935|27060|68775|56365|11974|242341|20499|11984	http://www.genome.jp/kegg-bin/show_pathway?mmu04966/mmu:11972%09red/mmu:27060%09red/mmu:73834%09red/mmu:11964%09red/mmu:11974%09red/mmu:12349%09red/mmu:68775%09red/mmu:11944%09red/mmu:11966%09red/mmu:21871%09red/mmu:11984%09red/mmu:338375%09red/mmu:76252%09red/mmu:11975%09red/mmu:20533%09red/mmu:110935%09red/mmu:140494%09red/mmu:242341%09red/mmu:20499%09red/mmu:56365%09red
Staphylococcus aureus infection	KEGG PATHWAY	mmu05150	33	53	0.0226715	0.0304816	317677|15894|14130|19204|99571|16415|16414|16661|15002|15001|15000|211924|50909|12273|13510|14961|14960|14129|14969|17175|17174|15139|20344|20345|16408|16409|12630|14998|12268|16019|12263|16153|12267	http://www.genome.jp/kegg-bin/show_pathway?mmu05150/mmu:14130%09red/mmu:16409%09red/mmu:16408%09red/mmu:12273%09red/mmu:14999%09red/mmu:14998%09red/mmu:50909%09red/mmu:12630%09red/mmu:13510%09red/mmu:19204%09red/mmu:211924%09red/mmu:317677%09red/mmu:15139%09red/mmu:17174%09red/mmu:17175%09red/mmu:16414%09red/mmu:16415%09red/mmu:16661%09red/mmu:99571%09red/mmu:14129%09red/mmu:12267%09red/mmu:14960…
Protein export	KEGG PATHWAY	mmu03060	22	31	0.0226792	0.0304816	66286|76687|66384|53421|24067|20335|93757|69089|100101806|20818|56529|66624|66541|14828|66661|76219|665155|27058|140740|69276|67398|57743	http://www.genome.jp/kegg-bin/show_pathway?mmu03060/mmu:20818%09red/mmu:27058%09red/mmu:53421%09red/mmu:66286%09red/mmu:69276%09red/mmu:57743%09red/mmu:69089%09red/mmu:14828%09red/mmu:20335%09red/mmu:66624%09red/mmu:76219%09red/mmu:67398%09red/mmu:100101806%09red/mmu:66661%09red/mmu:24067%09red/mmu:66541%09red/mmu:56529%09red/mmu:93757%09red/mmu:76687%09red/mmu:140740%09red/mmu:66384%09red
Fructose and mannose metabolism	KEGG PATHWAY	mmu00051	24	35	0.0231969	0.0310352	18642|18640|67861|212032|230163|56421|234730|225913|29858|110119|14121|14120|15275|15277|22122|11674|54128|270198|331026|170768|20322|11676|216019|319801	http://www.genome.jp/kegg-bin/show_pathway?mmu00051/mmu:212032%09red/mmu:18642%09red/mmu:225913%09red/mmu:67861%09red/mmu:15277%09red/mmu:14121%09red/mmu:230163%09red/mmu:216019%09red/mmu:14120%09red/mmu:319801%09red/mmu:331026%09red/mmu:15275%09red/mmu:22122%09red/mmu:270198%09red/mmu:234730%09red/mmu:11674%09red/mmu:11676%09red/mmu:170768%09red/mmu:56421%09red/mmu:18640%09red/mmu:20322%09red/mm…
Porphyrin and chlorophyll metabolism	KEGG PATHWAY	mmu00860	27	41	0.0234328	0.0312082	110006|12870|22236|243085|12892|77697|14151|15368|15369|15203|233016|15159|14297|613123|394430|226139|109778|70383|100727|94284|394436|394435|394434|394433|394432|22275|11655	http://www.genome.jp/kegg-bin/show_pathway?mmu00860/mmu:12892%09red/mmu:15369%09red/mmu:15368%09red/mmu:14151%09red/mmu:70383%09red/mmu:233016%09red/mmu:94284%09red/mmu:14297%09red/mmu:110006%09red/mmu:15159%09red/mmu:100727%09red/mmu:243085%09red/mmu:77697%09red/mmu:226139%09red/mmu:11655%09red/mmu:394435%09red/mmu:394430%09red/mmu:394432%09red/mmu:394433%09red/mmu:394434%09red/mmu:22275%09red/m…
Steroid hormone biosynthesis	KEGG PATHWAY	mmu00140	49	87	0.0235844	0.031268	14979|22236|243085|20860|94284|394430|208665|223706|394433|13088|394435|226143|243881|394434|56448|69888|13106|13101|76279|433247|613123|110115|15486|57357|15484|15485|13105|78925|380997|12846|100727|13075|13076|13099|13078|13097|13094|13095|13090|13113|394436|15496|15497|15490|394432|15492|15493|56348|27400	http://www.genome.jp/kegg-bin/show_pathway?mmu00140/mmu:13113%09red/mmu:226143%09red/mmu:94284%09red/mmu:13099%09red/mmu:76279%09red/mmu:14979%09red/mmu:13095%09red/mmu:13094%09red/mmu:13097%09red/mmu:13090%09red/mmu:12846%09red/mmu:78925%09red/mmu:57357%09red/mmu:15490%09red/mmu:15493%09red/mmu:15492%09red/mmu:20860%09red/mmu:15497%09red/mmu:15496%09red/mmu:56348%09red/mmu:380997%09red/mmu:24308…
Malaria	KEGG PATHWAY	mmu05144	31	50	0.027596	0.0364217	21947|15894|21826|21825|16415|16414|12985|71683|13349|16193|12520|21898|20339|22329|21939|15529|18613|17874|20344|20969|17295|16408|12845|15234|16971|21926|21803|16176|21808|21809|16153	http://www.genome.jp/kegg-bin/show_pathway?mmu05144/mmu:16408%09red/mmu:21947%09red/mmu:21825%09red/mmu:21809%09red/mmu:21808%09red/mmu:21826%09red/mmu:21803%09red/mmu:21926%09red/mmu:16193%09red/mmu:20339%09red/mmu:12845%09red/mmu:15529%09red/mmu:71683%09red/mmu:17874%09red/mmu:15234%09red/mmu:12985%09red/mmu:16414%09red/mmu:16415%09red/mmu:12520%09red/mmu:21898%09red/mmu:22329%09red/mmu:13349%0…
Homologous recombination	KEGG PATHWAY	mmu03440	20	28	0.0277547	0.036467	18971|19364|19365|71711|19363|19360|19361|74335|21976|12144|21975|17535|57434|268465|381760|12190|68275|114714|67967|19891	http://www.genome.jp/kegg-bin/show_pathway?mmu03440/mmu:19363%09red/mmu:19361%09red/mmu:19360%09red/mmu:68275%09red/mmu:381760%09red/mmu:19365%09red/mmu:19364%09red/mmu:57434%09red/mmu:268465%09red/mmu:74335%09red/mmu:21975%09red/mmu:21976%09red/mmu:18971%09red/mmu:17535%09red/mmu:19891%09red/mmu:71711%09red/mmu:114714%09red/mmu:12190%09red/mmu:12144%09red/mmu:67967%09red
Glycosaminoglycan biosynthesis - keratan sulfate	KEGG PATHWAY	mmu00533	13	15	0.0279289	0.036532	26887|20444|20442|20441|54371|53418|56773|76969|57370|14595|53625|56375|108902	http://www.genome.jp/kegg-bin/show_pathway?mmu00533/mmu:20442%09red/mmu:108902%09red/mmu:20441%09red/mmu:53625%09red/mmu:20444%09red/mmu:54371%09red/mmu:76969%09red/mmu:56773%09red/mmu:53418%09red/mmu:14595%09red/mmu:26887%09red/mmu:56375%09red/mmu:57370%09red
Alanine, aspartate and glutamate metabolism	KEGG PATHWAY	mmu00250	25	38	0.028673	0.0373386	214579|108682|14718|11484|11564|14204|14417|14415|100470|231327|11566|216456|70503|268860|14645|14660|14661|194237|14584|108653|14583|212647|11611|76282|269642	http://www.genome.jp/kegg-bin/show_pathway?mmu00250/mmu:14661%09red/mmu:14718%09red/mmu:14645%09red/mmu:108653%09red/mmu:14660%09red/mmu:212647%09red/mmu:14583%09red/mmu:14584%09red/mmu:269642%09red/mmu:194237%09red/mmu:214579%09red/mmu:14204%09red/mmu:11484%09red/mmu:100470%09red/mmu:11611%09red/mmu:14417%09red/mmu:14415%09red/mmu:11564%09red/mmu:11566%09red/mmu:216456%09red/mmu:268860%09red/mmu…
Cardiac muscle contraction	KEGG PATHWAY	mmu04260	45	80	0.0294475	0.0381775	67821|59069|54376|54377|20544|20541|232975|20463|12294|12857|22272|12298|20191|326618|12293|12297|12296|12295|22004|17906|11938|11936|11933|11932|11931|319734|81904|12864|54652|236794|56808|22003|12288|12289|12859|59310|98660|11928|22273|21924|12300|66576|140723|17896|17897	http://www.genome.jp/kegg-bin/show_pathway?mmu04260/mmu:56808%09red/mmu:12289%09red/mmu:232975%09red/mmu:319734%09red/mmu:20541%09red/mmu:17897%09red/mmu:17896%09red/mmu:20544%09red/mmu:22004%09red/mmu:20463%09red/mmu:21924%09red/mmu:12296%09red/mmu:12297%09red/mmu:12294%09red/mmu:12295%09red/mmu:12293%09red/mmu:12864%09red/mmu:12288%09red/mmu:12298%09red/mmu:11928%09red/mmu:66576%09red/mmu:20191…
Glycosaminoglycan degradation	KEGG PATHWAY	mmu00531	16	21	0.0324321	0.0418617	27419|15932|15931|15442|110006|109685|545291|11881|74409|15586|15587|12091|77042|27029|75612|50917	http://www.genome.jp/kegg-bin/show_pathway?mmu00531/mmu:77042%09red/mmu:27419%09red/mmu:109685%09red/mmu:15442%09red/mmu:15587%09red/mmu:15586%09red/mmu:110006%09red/mmu:75612%09red/mmu:27029%09red/mmu:74409%09red/mmu:12091%09red/mmu:15932%09red/mmu:545291%09red/mmu:11881%09red/mmu:15931%09red/mmu:50917%09red
Drug metabolism - other enzymes	KEGG PATHWAY	mmu00983	31	51	0.032795	0.0421444	110006|229363|102022|22236|243085|15452|22017|103149|394436|23917|17962|72361|234673|22247|22245|68556|22436|72269|613123|80914|99586|100727|57813|94284|72962|394435|394434|394433|394432|234669|394430	http://www.genome.jp/kegg-bin/show_pathway?mmu00983/mmu:23917%09red/mmu:22017%09red/mmu:234669%09red/mmu:72269%09red/mmu:94284%09red/mmu:99586%09red/mmu:22247%09red/mmu:22245%09red/mmu:72962%09red/mmu:110006%09red/mmu:68556%09red/mmu:100727%09red/mmu:243085%09red/mmu:229363%09red/mmu:234673%09red/mmu:15452%09red/mmu:102022%09red/mmu:80914%09red/mmu:57813%09red/mmu:394430%09red/mmu:394432%09red/mm…
Glycosylphosphatidylinositol(GPI)-anchor biosynthesis	KEGG PATHWAY	mmu00563	18	25	0.0340448	0.0435595	18700|276846|110417|14755|14756|14731|27392|67292|241062|56176|67556|55981|78928|13481|72084|329777|230801|327942	http://www.genome.jp/kegg-bin/show_pathway?mmu00563/mmu:329777%09red/mmu:56176%09red/mmu:14756%09red/mmu:78928%09red/mmu:13481%09red/mmu:241062%09red/mmu:327942%09red/mmu:14731%09red/mmu:110417%09red/mmu:55981%09red/mmu:67292%09red/mmu:230801%09red/mmu:14755%09red/mmu:67556%09red/mmu:276846%09red/mmu:27392%09red/mmu:18700%09red/mmu:72084%09red
Butanoate metabolism	KEGG PATHWAY	mmu00650	19	27	0.0345497	0.0440133	214579|20216|217666|14417|78894|14415|15360|272428|208715|71911|233799|110446|208982|11409|69772|268860|110460|97212|67041	http://www.genome.jp/kegg-bin/show_pathway?mmu00650/mmu:272428%09red/mmu:268860%09red/mmu:14417%09red/mmu:14415%09red/mmu:20216%09red/mmu:208715%09red/mmu:214579%09red/mmu:208982%09red/mmu:69772%09red/mmu:15360%09red/mmu:110446%09red/mmu:11409%09red/mmu:110460%09red/mmu:233799%09red/mmu:217666%09red/mmu:67041%09red/mmu:71911%09red/mmu:78894%09red/mmu:97212%09red
Fatty acid biosynthesis	KEGG PATHWAY	mmu00061	12	14	0.0358331	0.0454507	94180|78625|216739|14104|107476|74205|71147|223722|14081|433256|50790|100705	http://www.genome.jp/kegg-bin/show_pathway?mmu00061/mmu:107476%09red/mmu:100705%09red/mmu:78625%09red/mmu:74205%09red/mmu:71147%09red/mmu:94180%09red/mmu:14081%09red/mmu:50790%09red/mmu:216739%09red/mmu:14104%09red/mmu:223722%09red/mmu:433256%09red
Valine, leucine and isoleucine degradation	KEGG PATHWAY	mmu00280	33	56	0.0374075	0.0472431	58875|56752|66948|257633|52538|208982|12035|113868|14204|231086|110821|100470|15360|66885|78894|11669|110446|104776|11409|72039|97212|67041|268860|71724|110460|72535|11992|110695|11671|208715|17850|78038|13171	http://www.genome.jp/kegg-bin/show_pathway?mmu00280/mmu:58875%09red/mmu:208715%09red/mmu:15360%09red/mmu:110821%09red/mmu:78038%09red/mmu:11669%09red/mmu:66948%09red/mmu:56752%09red/mmu:71724%09red/mmu:110695%09red/mmu:104776%09red/mmu:14204%09red/mmu:72535%09red/mmu:100470%09red/mmu:97212%09red/mmu:52538%09red/mmu:11671%09red/mmu:11992%09red/mmu:72039%09red/mmu:78894%09red/mmu:12035%09red/mmu:23…
Other glycan degradation	KEGG PATHWAY	mmu00511	14	18	0.039656	0.0498679	241159|11593|217364|50877|230101|14466|73744|238023|18010|12091|66848|23956|17159|110173	http://www.genome.jp/kegg-bin/show_pathway?mmu00511/mmu:110173%09red/mmu:66848%09red/mmu:73744%09red/mmu:50877%09red/mmu:230101%09red/mmu:217364%09red/mmu:17159%09red/mmu:23956%09red/mmu:241159%09red/mmu:18010%09red/mmu:14466%09red/mmu:12091%09red/mmu:11593%09red/mmu:238023%09red

## Sheet: HypoTH+T3 vs Control
##Databases: KEGG PATHWAY
##Statistical test method: hypergeometric test / Fisher's exact test
##FDR correction method: Benjamini and Hochberg
#Term	Database	ID	Input number	Background number	P-Value	Corrected P-Value	Input	Hyperlink
Metabolic pathways	KEGG PATHWAY	mmu01100	1227	1298	2.36e-54	6.56e-52	78914|20447|20917|20444|320302|20442|20441|14854|110417|66966|17161|243085|110006|20449|19714|20916|20443|11984|54218|269614|269615|18950|13089|13088|19012|13085|107885|13087|20440|13081|13082|22262|269180|269181|225010|13244|270076|435489|13166|100163|108902|18778|29858|75540|241452|214253|16770|11821|244486|16774|19378|16776|107869|74409|71911|320951|66052|20448|235386|53418|22169|68636|100066|…	http://www.genome.jp/kegg-bin/show_pathway?mmu01100/mmu:16770%09red/mmu:67164%09red/mmu:16774%09red/mmu:231510%09red/mmu:270084%09red/mmu:13200%09red/mmu:69772%09red/mmu:66966%09red/mmu:74185%09red/mmu:237625%09red/mmu:94284%09red/mmu:100163%09red/mmu:666168%09red/mmu:26459%09red/mmu:331487%09red/mmu:70428%09red/mmu:13195%09red/mmu:11821%09red/mmu:53618%09red/mmu:268860%09red/mmu:57377%09red/mmu:…
Olfactory transduction	KEGG PATHWAY	mmu04740	993	1102	1.96e-38	2.72e-36	257985|14918|14919|258526|258255|258524|258257|258522|258398|258520|258521|258395|258394|258397|258396|258258|258259|258528|258392|258097|258688|258158|258156|258155|258154|258153|258151|170639|108058|258952|258320|258321|258322|258323|258324|258325|258326|258327|258328|258329|258098|258525|546747|258399|258620|100042690|258523|258984|258985|258631|258636|258252|258982|258635|258733|233649|258638…	http://www.genome.jp/kegg-bin/show_pathway?mmu04740/mmu:258861%09red/mmu:258270%09red/mmu:18361%09red/mmu:258408%09red/mmu:258409%09red/mmu:258402%09red/mmu:258403%09red/mmu:258401%09red/mmu:258406%09red/mmu:258407%09red/mmu:258404%09red/mmu:258405%09red/mmu:433031%09red/mmu:258323%09red/mmu:257919%09red/mmu:64337%09red/mmu:257910%09red/mmu:257913%09red/mmu:257912%09red/mmu:257915%09red/mmu:25791…
Pathways in cancer	KEGG PATHWAY	mmu05200	393	398	3.52e-20	3.26e-18	14174|14175|14176|14177|14170|14171|14172|14678|19713|14674|14178|14672|19015|19016|14679|19395|14173|14677|19401|12159|16779|14673|16772|16773|16774|16775|16776|16777|12061|12062|14180|14183|27401|14184|13016|13017|18176|433759|13544|12986|19878|12982|13542|13543|19877|14695|14697|14696|14693|12015|14699|18510|26395|67673|26396|13866|56044|16400|12122|20525|67923|12447|12443|18854|15245|12448|12…	http://www.genome.jp/kegg-bin/show_pathway?mmu05200/mmu:16773%09red/mmu:16772%09red/mmu:16775%09red/mmu:16774%09red/mmu:16777%09red/mmu:16776%09red/mmu:432530%09red/mmu:22409%09red/mmu:18854%09red/mmu:19697%09red/mmu:433759%09red/mmu:67168%09red/mmu:12827%09red/mmu:12826%09red/mmu:12829%09red/mmu:12828%09red/mmu:15251%09red/mmu:242705%09red/mmu:22413%09red/mmu:14255%09red/mmu:22411%09red/mmu:2241…
PI3K-Akt signaling pathway	KEGG PATHWAY	mmu04151	327	350	6.89e-15	4.79e-13	14174|14175|14176|17763|14170|12978|14172|94216|66066|22371|13640|14178|13836|56637|56636|12833|208677|14177|14268|329278|12835|17295|16334|12839|17311|15516|14062|319480|320910|12675|67168|14173|16412|12447|13638|13639|11911|20963|21827|14709|192897|52432|80903|13684|19651|22084|16779|14103|22370|65086|16772|16773|320795|16775|16776|16777|12830|12828|12829|12824|12826|12827|26931|110157|13685|26…	http://www.genome.jp/kegg-bin/show_pathway?mmu04151/mmu:13685%09red/mmu:16773%09red/mmu:18176%09red/mmu:16775%09red/mmu:16774%09red/mmu:16777%09red/mmu:16776%09red/mmu:67168%09red/mmu:14710%09red/mmu:15234%09red/mmu:13684%09red/mmu:235542%09red/mmu:15974%09red/mmu:15975%09red/mmu:19697%09red/mmu:170755%09red/mmu:21923%09red/mmu:19699%09red/mmu:22627%09red/mmu:59032%09red/mmu:14177%09red/mmu:81877…
MAPK signaling pathway	KEGG PATHWAY	mmu04010	248	254	5.85e-13	3.25e-11	14174|14175|17762|14177|14170|14171|58226|16476|12929|12928|16765|14178|18099|16478|17164|17165|12295|18015|15511|12294|110157|78390|14172|12675|381921|14173|11911|240168|63953|56636|192176|22030|21812|14103|14102|19279|14673|29857|110651|14179|26401|26400|26403|26405|26404|26407|26406|26409|26408|70686|286940|12064|15507|19060|60597|12531|271844|14180|14183|14182|14184|14186|19418|19419|109905|1…	http://www.genome.jp/kegg-bin/show_pathway?mmu04010/mmu:17165%09red/mmu:56808%09red/mmu:14013%09red/mmu:109689%09red/mmu:216869%09red/mmu:21812%09red/mmu:17164%09red/mmu:19697%09red/mmu:170758%09red/mmu:26401%09red/mmu:19417%09red/mmu:17762%09red/mmu:21926%09red/mmu:13197%09red/mmu:12296%09red/mmu:12297%09red/mmu:12294%09red/mmu:12295%09red/mmu:12292%09red/mmu:18211%09red/mmu:12290%09red/mmu:1229…
Ras signaling pathway	KEGG PATHWAY	mmu04014	230	231	1.12e-12	5.17e-11	14174|14175|14176|14177|14170|14701|14172|14173|54601|14178|13836|56636|16333|18015|17295|54354|16334|14171|13636|13637|12675|19395|12314|13638|13639|234779|26396|14709|80903|225870|12313|18481|14103|494124|14179|66482|110157|18805|18806|271849|18803|271844|14180|14183|26565|72399|14186|19418|64143|109905|19414|19415|19417|14182|18479|18176|18654|21844|14184|26413|70584|26417|26414|16542|26419|14…	http://www.genome.jp/kegg-bin/show_pathway?mmu04014/mmu:53357%09red/mmu:22637%09red/mmu:237625%09red/mmu:21844%09red/mmu:78390%09red/mmu:19697%09red/mmu:19696%09red/mmu:56044%09red/mmu:23872%09red/mmu:64143%09red/mmu:70584%09red/mmu:54153%09red/mmu:18747%09red/mmu:19345%09red/mmu:19344%09red/mmu:16797%09red/mmu:18749%09red/mmu:18053%09red/mmu:20130%09red/mmu:16706%09red/mmu:14710%09red/mmu:14708%…
Endocytosis	KEGG PATHWAY	mmu04144	271	294	3.53e-12	1.4e-10	58220|110557|72318|57440|54198|216963|19713|69150|18762|22376|20844|12774|15461|20779|15511|72543|83814|259300|19349|15043|15042|15040|14985|14773|232227|22365|12402|218038|30930|319277|52055|74998|19159|19158|17274|16001|19157|69710|11773|215632|67300|98366|18806|16572|107305|243621|22088|93737|66700|16574|56324|14062|16573|230837|18805|14990|14991|12389|14997|15006|211914|14183|56433|14184|1799…	http://www.genome.jp/kegg-bin/show_pathway?mmu04144/mmu:15006%09red/mmu:17274%09red/mmu:109689%09red/mmu:18854%09red/mmu:14972%09red/mmu:67771%09red/mmu:211673%09red/mmu:11867%09red/mmu:12757%09red/mmu:13867%09red/mmu:243621%09red/mmu:19349%09red/mmu:18211%09red/mmu:66914%09red/mmu:107338%09red/mmu:19345%09red/mmu:19344%09red/mmu:26385%09red/mmu:19341%09red/mmu:11848%09red/mmu:13869%09red/mmu:726…
HTLV-I infection	KEGG PATHWAY	mmu05166	270	295	6.4e-12	2.23e-10	110557|13712|16476|93897|73181|56637|15461|14367|69957|59001|17000|18019|18018|227606|11789|67967|59008|15043|15042|30939|14985|66440|12675|70461|20375|14370|11910|19056|56150|100504404|16169|16168|52206|20851|18033|50883|382056|66156|26401|66979|26406|93735|17703|14990|14991|14997|103573|210044|630294|14999|13557|19385|22420|13383|328572|22059|16177|11908|11909|12387|18176|60599|11920|22334|1722…	http://www.genome.jp/kegg-bin/show_pathway?mmu05166/mmu:18186%09red/mmu:432530%09red/mmu:22408%09red/mmu:237336%09red/mmu:224753%09red/mmu:12916%09red/mmu:12028%09red/mmu:14972%09red/mmu:19697%09red/mmu:21813%09red/mmu:12317%09red/mmu:19698%09red/mmu:72049%09red/mmu:67967%09red/mmu:14368%09red/mmu:14369%09red/mmu:21752%09red/mmu:18747%09red/mmu:93897%09red/mmu:104111%09red/mmu:14362%09red/mmu:187…
Rap1 signaling pathway	KEGG PATHWAY	mmu04015	210	215	3.22e-11	9.93e-10	14174|14175|14176|14177|14170|18643|12927|14678|12929|18760|18762|14178|13836|56636|382562|11540|11541|20779|17295|54354|16334|14171|13636|13637|18796|18797|14172|19395|15901|18798|14293|13638|13639|11465|14677|56508|11461|12928|12313|30955|494124|65086|12314|29857|14179|93737|13489|14065|14062|110157|12388|14745|18803|210044|12387|14182|14184|14186|64143|109905|14180|54519|14183|18176|21844|2176…	http://www.genome.jp/kegg-bin/show_pathway?mmu04015/mmu:18176%09red/mmu:432530%09red/mmu:70405%09red/mmu:16590%09red/mmu:79264%09red/mmu:21844%09red/mmu:170758%09red/mmu:56044%09red/mmu:64143%09red/mmu:74206%09red/mmu:75292%09red/mmu:227377%09red/mmu:238130%09red/mmu:16409%09red/mmu:14177%09red/mmu:104111%09red/mmu:18053%09red/mmu:20130%09red/mmu:50791%09red/mmu:64654%09red/mmu:67112%09red/mmu:38…
Neuroactive ligand-receptor interaction	KEGG PATHWAY	mmu04080	258	285	3.89e-11	1.08e-09	12921|12000|12922|69296|242425|67373|11542|54598|11541|26361|11548|11549|14064|22072|16846|14800|11540|13617|67168|12671|11607|13489|13488|110886|14803|18389|17202|18387|18440|12273|110637|239845|18815|18441|18167|18166|17200|217369|18442|65086|208188|20609|20608|233571|18169|18168|231252|216749|73626|12061|12062|14065|14062|14063|14061|140795|237362|104443|19065|14745|12669|231602|94045|13609|50…	http://www.genome.jp/kegg-bin/show_pathway?mmu04080/mmu:14401%09red/mmu:14394%09red/mmu:14403%09red/mmu:11438%09red/mmu:14405%09red/mmu:14404%09red/mmu:14407%09red/mmu:213527%09red/mmu:67168%09red/mmu:14408%09red/mmu:231602%09red/mmu:14715%09red/mmu:14397%09red/mmu:11435%09red/mmu:12921%09red/mmu:11539%09red/mmu:226278%09red/mmu:110637%09red/mmu:14294%09red/mmu:239336%09red/mmu:108043%09red/mmu:2…
Focal adhesion	KEGG PATHWAY	mmu04510	199	203	8.45e-11	2.14e-09	16476|13712|12927|94216|12929|12928|22371|22370|56637|286940|12833|12830|20779|329278|12835|12834|12839|13367|319480|11465|64099|11461|13649|192897|11855|170736|16779|16772|16773|16774|16775|67268|16777|12828|12829|104099|12824|12826|12827|60595|59310|12389|271849|192176|12387|109905|19303|11472|14268|226519|18479|329251|68794|57342|22793|26413|19878|16416|26417|109880|16412|16542|26419|16419|198…	http://www.genome.jp/kegg-bin/show_pathway?mmu04510/mmu:16773%09red/mmu:16772%09red/mmu:16775%09red/mmu:16774%09red/mmu:16777%09red/mmu:16776%09red/mmu:16779%09red/mmu:170758%09red/mmu:21923%09red/mmu:19699%09red/mmu:22793%09red/mmu:70584%09red/mmu:13866%09red/mmu:12387%09red/mmu:22323%09red/mmu:14360%09red/mmu:245026%09red/mmu:14083%09red/mmu:18709%09red/mmu:12824%09red/mmu:12827%09red/mmu:12826…
Regulation of actin cytoskeleton	KEGG PATHWAY	mmu04810	209	218	1.05e-10	2.43e-09	76884|14175|14176|14177|14170|18643|77579|216963|12929|12928|14674|14178|22376|56636|14083|15461|18645|14268|237860|117150|214230|13367|319480|30938|12927|16334|16420|14173|12671|20779|381924|11465|11461|13649|192897|80903|544963|18481|50884|11836|14673|67268|14179|243764|54126|382562|12061|12062|14062|14061|60595|59310|12669|14180|14183|14182|14184|14186|101314|19303|11472|20430|108100|68089|226…	http://www.genome.jp/kegg-bin/show_pathway?mmu04810/mmu:76884%09red/mmu:67771%09red/mmu:170758%09red/mmu:16416%09red/mmu:237860%09red/mmu:329165%09red/mmu:70584%09red/mmu:16409%09red/mmu:14177%09red/mmu:16408%09red/mmu:20130%09red/mmu:18709%09red/mmu:320910%09red/mmu:77579%09red/mmu:64654%09red/mmu:216963%09red/mmu:404710%09red/mmu:67112%09red/mmu:23805%09red/mmu:382562%09red/mmu:105855%09red/mmu…
cAMP signaling pathway	KEGG PATHWAY	mmu04024	194	198	1.48e-10	3.02e-09	16476|14679|14678|14677|242425|15166|11540|18018|215449|19013|14062|13489|13488|12315|18805|110157|18166|20605|18160|20609|108058|381290|11936|67972|12064|208188|18806|320707|12669|210044|20682|12789|12788|109905|328572|13492|18479|21844|233649|242443|109648|19206|26413|19878|236781|26417|109880|14632|53623|26419|19877|14308|20191|12015|170758|13617|233079|26395|12314|56508|12313|11938|30955|7828…	http://www.genome.jp/kegg-bin/show_pathway?mmu04024/mmu:432530%09red/mmu:11430%09red/mmu:21844%09red/mmu:18708%09red/mmu:11539%09red/mmu:19697%09red/mmu:170758%09red/mmu:233649%09red/mmu:12292%09red/mmu:27222%09red/mmu:104111%09red/mmu:13617%09red/mmu:18749%09red/mmu:56508%09red/mmu:20130%09red/mmu:271639%09red/mmu:11928%09red/mmu:14800%09red/mmu:14802%09red/mmu:238871%09red/mmu:108058%09red/mmu:…
Proteoglycans in cancer	KEGG PATHWAY	mmu05205	201	208	1.52e-10	3.02e-09	20848|14173|93897|15163|286940|22408|20779|75705|15200|18792|18793|12402|68794|11465|16160|11461|22370|20969|18569|14102|327826|11836|108058|29857|15430|22160|17390|93735|17395|109676|16440|69253|12389|11652|18803|192176|12387|14182|22325|19303|13345|17246|18479|17022|329251|15530|21844|19206|26413|19878|16416|26416|26417|20423|26415|16542|16419|19877|17869|71950|12443|12505|83383|12390|12391|263…	http://www.genome.jp/kegg-bin/show_pathway?mmu05205/mmu:319757%09red/mmu:13207%09red/mmu:21844%09red/mmu:13982%09red/mmu:20423%09red/mmu:21926%09red/mmu:13866%09red/mmu:13867%09red/mmu:18747%09red/mmu:93897%09red/mmu:14362%09red/mmu:18749%09red/mmu:22422%09red/mmu:22423%09red/mmu:22420%09red/mmu:13869%09red/mmu:12512%09red/mmu:14366%09red/mmu:22421%09red/mmu:11735%09red/mmu:11733%09red/mmu:20130%…
Cytokine-cytokine receptor interaction	KEGG PATHWAY	mmu04060	238	265	3.52e-10	6.52e-09	16878|12458|16185|100040048|100042555|21947|12774|12775|12776|12777|12771|21941|12773|17000|12778|22035|16846|16847|21943|16963|16161|16160|16163|15974|16164|16162|21934|16169|16168|18383|21812|93672|56744|14103|14102|50929|100862177|213208|22164|22163|329244|83430|13607|17480|18053|12168|27279|16173|16171|16176|15979|12145|16175|209590|16178|18414|18413|15980|13019|57349|13856|13857|16326|56221|…	http://www.genome.jp/kegg-bin/show_pathway?mmu04060/mmu:23832%09red/mmu:100038993%09red/mmu:93672%09red/mmu:15976%09red/mmu:15974%09red/mmu:15975%09red/mmu:16323%09red/mmu:213208%09red/mmu:72049%09red/mmu:15978%09red/mmu:15979%09red/mmu:60505%09red/mmu:60504%09red/mmu:12458%09red/mmu:16326%09red/mmu:19109%09red/mmu:18053%09red/mmu:16963%09red/mmu:12804%09red/mmu:16160%09red/mmu:16878%09red/mmu:11…
Axon guidance	KEGG PATHWAY	mmu04360	174	176	8.16e-10	1.42e-08	58220|13835|13836|13837|107448|107449|14679|14678|14677|13640|13838|13839|56637|218877|20779|20564|237860|18019|20562|20563|13636|13637|16412|228026|13638|13639|234779|319713|19649|140571|140570|13841|18481|13842|13845|13844|12934|13846|13848|108058|14159|93737|14064|268902|18803|20360|20361|20351|223881|12632|18479|18176|19206|20357|26413|20355|20354|20353|20352|20423|20350|19876|19877|20359|203…	http://www.genome.jp/kegg-bin/show_pathway?mmu04360/mmu:20355%09red/mmu:18186%09red/mmu:20350%09red/mmu:319757%09red/mmu:65254%09red/mmu:170758%09red/mmu:20423%09red/mmu:18709%09red/mmu:70584%09red/mmu:14159%09red/mmu:14360%09red/mmu:14365%09red/mmu:20130%09red/mmu:19055%09red/mmu:19057%09red/mmu:17973%09red/mmu:17974%09red/mmu:140570%09red/mmu:140571%09red/mmu:19059%09red/mmu:19058%09red/mmu:118…
Calcium signaling pathway	KEGG PATHWAY	mmu04020	178	182	9.02e-10	1.47e-08	105675|16867|58226|14676|14675|56632|14672|11540|11541|26361|11548|11549|18795|18796|18797|114875|12671|18799|234779|13488|170732|53313|494124|12314|108058|243764|67972|12061|12062|14062|320707|18802|18803|231602|210044|12669|320404|110893|110891|94045|13492|19204|12425|12426|107589|20698|13618|20190|20192|15559|13617|15558|11441|12315|12313|11938|11937|20191|11608|54652|110094|233011|19218|14829…	http://www.genome.jp/kegg-bin/show_pathway?mmu04020/mmu:12494%09red/mmu:432530%09red/mmu:231602%09red/mmu:70405%09red/mmu:73333%09red/mmu:21924%09red/mmu:21925%09red/mmu:13866%09red/mmu:13867%09red/mmu:18216%09red/mmu:12292%09red/mmu:13618%09red/mmu:12290%09red/mmu:12291%09red/mmu:104111%09red/mmu:13617%09red/mmu:18749%09red/mmu:13869%09red/mmu:19055%09red/mmu:19057%09red/mmu:19056%09red/mmu:1922…
cGMP-PKG signaling pathway	KEGG PATHWAY	mmu04022	168	173	3.66e-09	5.65e-08	105675|14679|14678|14677|53313|54195|14673|14672|12314|11542|18158|16333|18019|11549|16370|17258|18796|18797|140781|18798|58802|11911|26396|11739|110157|30955|14674|494124|18160|72413|381290|67972|12062|208677|60596|320707|210044|11932|110893|12788|110891|14463|11909|26413|19878|26417|19877|107589|18018|13618|12015|230103|13617|26395|17259|11607|12315|12313|100502876|11938|11937|11936|242202|1193…	http://www.genome.jp/kegg-bin/show_pathway?mmu04022/mmu:432530%09red/mmu:11539%09red/mmu:16370%09red/mmu:12292%09red/mmu:27222%09red/mmu:104111%09red/mmu:13617%09red/mmu:19055%09red/mmu:19057%09red/mmu:19056%09red/mmu:11928%09red/mmu:19059%09red/mmu:19058%09red/mmu:17260%09red/mmu:17261%09red/mmu:53313%09red/mmu:213435%09red/mmu:11739%09red/mmu:110891%09red/mmu:80796%09red/mmu:16367%09red/mmu:239…
Oxytocin signaling pathway	KEGG PATHWAY	mmu04921	156	158	6.23e-09	9.12e-08	16476|54720|14679|14678|14677|54195|70405|20779|12295|18019|12294|18795|18796|18797|13631|18798|12314|11465|26396|11461|18429|110157|30955|494124|18160|108058|215303|211429|56808|60596|271844|210044|12300|80796|238564|18176|16519|81905|26413|19878|26417|108099|17904|19877|232889|18018|20191|12443|20192|230103|19079|329251|26395|241113|12315|12313|55984|216459|319734|105787|81904|108079|54652|2391…	http://www.genome.jp/kegg-bin/show_pathway?mmu04921/mmu:12494%09red/mmu:432530%09red/mmu:215303%09red/mmu:241113%09red/mmu:211480%09red/mmu:12296%09red/mmu:12297%09red/mmu:12294%09red/mmu:12295%09red/mmu:12292%09red/mmu:18747%09red/mmu:104111%09red/mmu:18749%09red/mmu:12298%09red/mmu:12299%09red/mmu:19055%09red/mmu:19057%09red/mmu:19056%09red/mmu:19225%09red/mmu:19059%09red/mmu:19058%09red/mmu:17…
RNA transport	KEGG PATHWAY	mmu03013	164	170	7.51e-09	1.04e-07	76884|53319|78482|66161|20918|66441|14265|68135|60365|75705|545388|66679|433702|78655|67204|69961|227720|68626|237082|20901|14359|73666|75826|381404|108112|114671|13688|234865|59015|276919|13682|13681|13685|13684|74097|66085|170722|26908|103573|19069|230861|19384|192170|19387|269113|103468|20220|72787|70047|209354|102614|20610|13690|67543|54709|434080|97112|269966|17149|218210|70699|77595|68134|2…	http://www.genome.jp/kegg-bin/show_pathway?mmu03013/mmu:231042%09red/mmu:53356%09red/mmu:13685%09red/mmu:13682%09red/mmu:331401%09red/mmu:13681%09red/mmu:67676%09red/mmu:13684%09red/mmu:13688%09red/mmu:76884%09red/mmu:225160%09red/mmu:54709%09red/mmu:224045%09red/mmu:55944%09red/mmu:72124%09red/mmu:75826%09red/mmu:66161%09red/mmu:208366%09red/mmu:26908%09red/mmu:26905%09red/mmu:66679%09red/mmu:68…
Viral carcinogenesis	KEGG PATHWAY	mmu05203	214	245	1.2e-08	1.58e-07	15451|20848|110557|208647|15024|12774|15461|12776|22033|20779|12771|12773|17000|21374|15043|15042|15040|14985|69389|13383|12028|69382|11911|20963|19645|17096|19651|110957|22030|227606|12534|56233|54123|83945|229906|66354|208677|66973|60595|15007|14990|14991|14997|15006|630294|27401|19385|19650|19303|11472|209357|17246|11909|12266|12571|232232|18176|433759|20684|26413|252870|26417|12427|12428|1257…	http://www.genome.jp/kegg-bin/show_pathway?mmu05203/mmu:18033%09red/mmu:237336%09red/mmu:224753%09red/mmu:13205%09red/mmu:12028%09red/mmu:14972%09red/mmu:19697%09red/mmu:19696%09red/mmu:71609%09red/mmu:319190%09red/mmu:13194%09red/mmu:22627%09red/mmu:18746%09red/mmu:19106%09red/mmu:433759%09red/mmu:18749%09red/mmu:240095%09red/mmu:224761%09red/mmu:107995%09red/mmu:66973%09red/mmu:14963%09red/mmu:…
mTOR signaling pathway	KEGG PATHWAY	mmu04150	152	156	1.7e-08	2.12e-07	56032|72149|29869|93897|56637|64930|216805|13543|17168|75705|319481|12675|216742|329679|66508|110157|320311|97998|75425|110651|277854|93735|68441|13685|13684|230784|16973|27401|16974|56430|67605|67071|18176|66144|71718|13544|26413|22409|26417|109880|108664|20111|22421|20112|66096|109270|26395|26396|22084|17254|22241|105787|108079|23797|57265|19211|16653|227154|20539|78757|110379|22418|22419|22416…	http://www.genome.jp/kegg-bin/show_pathway?mmu04150/mmu:13684%09red/mmu:13685%09red/mmu:22084%09red/mmu:17168%09red/mmu:52187%09red/mmu:21926%09red/mmu:72124%09red/mmu:14368%09red/mmu:14369%09red/mmu:14245%09red/mmu:93897%09red/mmu:14362%09red/mmu:22422%09red/mmu:14365%09red/mmu:22420%09red/mmu:245670%09red/mmu:22421%09red/mmu:216742%09red/mmu:56692%09red/mmu:16367%09red/mmu:110935%09red/mmu:6760…
Purine metabolism	KEGG PATHWAY	mmu00230	168	179	1.76e-08	2.12e-07	66979|15452|14919|54195|11821|14917|107569|53893|245841|59001|74414|67967|18950|231329|241489|231327|23917|27369|20017|110639|22262|18971|56520|14923|66358|18160|72157|18770|66401|229589|29863|26939|76974|109674|60596|18969|18968|210044|56248|108147|66763|18973|75533|229363|328099|75686|69870|230718|66491|104111|11564|11565|11566|67065|14198|69241|19076|23971|19075|23972|230103|100862375|54611|66…	http://www.genome.jp/kegg-bin/show_pathway?mmu00230/mmu:11821%09red/mmu:12495%09red/mmu:432530%09red/mmu:231903%09red/mmu:18584%09red/mmu:18585%09red/mmu:18587%09red/mmu:18582%09red/mmu:18583%09red/mmu:633979%09red/mmu:110639%09red/mmu:18588%09red/mmu:70428%09red/mmu:11534%09red/mmu:67967%09red/mmu:18746%09red/mmu:104111%09red/mmu:23984%09red/mmu:229665%09red/mmu:70881%09red/mmu:229589%09red/mmu:…
Protein processing in endoplasmic reticulum	KEGG PATHWAY	mmu04141	159	167	2.23e-08	2.59e-07	228684|22030|70361|54609|54197|59007|116891|66256|15511|66861|73318|77371|71853|15516|21402|11911|81489|13002|56085|63958|107513|105245|217365|70377|66397|26400|17156|17155|15502|26408|13418|15505|15519|56438|66245|231098|235416|12304|67475|18415|50762|216197|56228|140499|103963|94232|50873|53421|108687|26414|66967|22393|26419|64209|15512|12018|12017|81500|56424|270669|74126|12317|386649|69162|72…	http://www.genome.jp/kegg-bin/show_pathway?mmu04141/mmu:240667%09red/mmu:109815%09red/mmu:71853%09red/mmu:13200%09red/mmu:226641%09red/mmu:12028%09red/mmu:100037258%09red/mmu:67475%09red/mmu:216440%09red/mmu:69608%09red/mmu:19106%09red/mmu:50762%09red/mmu:20334%09red/mmu:20335%09red/mmu:78943%09red/mmu:17872%09red/mmu:105245%09red/mmu:235416%09red/mmu:66967%09red/mmu:103963%09red/mmu:23802%09red/…
Wnt signaling pathway	KEGG PATHWAY	mmu04310	144	146	2.42e-08	2.69e-07	16476|18099|20671|93897|75826|56637|21372|18019|18018|56811|11789|20379|19015|18796|18797|16842|27412|18798|21402|81004|19056|13001|13000|108058|19057|114671|26409|93735|27373|56438|16973|12387|16974|13016|14735|328572|12301|74499|17393|76441|13544|19878|68010|22408|13542|13543|26419|53627|208846|13017|170758|93687|13380|14296|67772|56505|19353|19354|57265|12914|67087|20437|12995|22418|22419|2241…	http://www.genome.jp/kegg-bin/show_pathway?mmu04310/mmu:27412%09red/mmu:170758%09red/mmu:67772%09red/mmu:14368%09red/mmu:14369%09red/mmu:18747%09red/mmu:93897%09red/mmu:14362%09red/mmu:18749%09red/mmu:22422%09red/mmu:22423%09red/mmu:22420%09red/mmu:14367%09red/mmu:19055%09red/mmu:19057%09red/mmu:19056%09red/mmu:19059%09red/mmu:19058%09red/mmu:93960%09red/mmu:23805%09red/mmu:24117%09red/mmu:108058…
Chemokine signaling pathway	KEGG PATHWAY	mmu04062	180	198	2.57e-08	2.75e-07	20848|12927|14678|12929|12928|15162|18762|20847|22376|56637|12774|12775|12776|12777|20779|12771|12772|12773|18795|18796|18797|14772|14773|12675|16963|18798|14677|110157|56744|100862177|20846|215449|271849|210044|109905|19303|12145|320129|18479|18176|21844|56221|216869|26413|19878|56838|26417|109880|20299|20297|20295|20292|19877|20290|606496|14695|14697|14696|14693|14191|14699|26395|17096|20851|55…	http://www.genome.jp/kegg-bin/show_pathway?mmu04062/mmu:432530%09red/mmu:14710%09red/mmu:109689%09red/mmu:21844%09red/mmu:19697%09red/mmu:330122%09red/mmu:18747%09red/mmu:12458%09red/mmu:104111%09red/mmu:26385%09red/mmu:18749%09red/mmu:14083%09red/mmu:16963%09red/mmu:23832%09red/mmu:12768%09red/mmu:19229%09red/mmu:14708%09red/mmu:14709%09red/mmu:20299%09red/mmu:20297%09red/mmu:20295%09red/mmu:147…
Hippo signaling pathway	KEGG PATHWAY	mmu04390	149	154	3.12e-08	3.2e-07	20674|58220|16475|15902|27494|15901|93897|18762|56637|18016|11789|16842|23859|11465|319710|11461|22628|21813|56274|241324|21679|21678|21677|21676|14219|93737|11576|93735|27373|53310|12385|12387|12386|209456|16415|14633|22409|71978|13542|13543|17869|13385|12159|12156|101543|16897|105782|57265|56217|22418|22419|22416|22417|22414|22415|22412|22413|22410|22411|93960|211652|19047|19046|19045|12005|167…	http://www.genome.jp/kegg-bin/show_pathway?mmu04390/mmu:56289%09red/mmu:12695%09red/mmu:22627%09red/mmu:14368%09red/mmu:14369%09red/mmu:27494%09red/mmu:93897%09red/mmu:14362%09red/mmu:22422%09red/mmu:22423%09red/mmu:14366%09red/mmu:14367%09red/mmu:53310%09red/mmu:27373%09red/mmu:19053%09red/mmu:19052%09red/mmu:20583%09red/mmu:21809%09red/mmu:64010%09red/mmu:93960%09red/mmu:23805%09red/mmu:52432%0…
Signaling pathways regulating pluripotency of stem cells	KEGG PATHWAY	mmu04550	139	140	3.23e-08	3.2e-07	20674|15904|20848|16600|15903|15901|93897|56637|18014|15902|51869|11789|21405|14173|15209|18423|19712|110157|16468|29857|93735|15110|16873|14183|14182|14184|14186|13395|11477|76073|11906|55994|12387|11479|16878|18176|13544|26413|26416|26417|13542|26415|20482|17869|13990|26395|26396|12159|12156|17125|12151|16326|16325|16324|16323|57265|22658|16653|69587|18999|17877|15407|22418|22419|22416|22417|22…	http://www.genome.jp/kegg-bin/show_pathway?mmu04550/mmu:18999%09red/mmu:17126%09red/mmu:14368%09red/mmu:14369%09red/mmu:15904%09red/mmu:18508%09red/mmu:93897%09red/mmu:15903%09red/mmu:14362%09red/mmu:22422%09red/mmu:14365%09red/mmu:14366%09red/mmu:26380%09red/mmu:22658%09red/mmu:11479%09red/mmu:16324%09red/mmu:22421%09red/mmu:16878%09red/mmu:11480%09red/mmu:11481%09red/mmu:17268%09red/mmu:23805%0…
Epstein-Barr virus infection	KEGG PATHWAY	mmu05169	202	232	3.53e-08	3.36e-07	110557|23996|20848|54721|69253|16476|54194|56637|245841|23997|15511|22034|15512|74414|21374|15043|15042|15040|231329|22627|21762|12675|103573|20375|26397|234779|19182|20963|13001|13000|227720|227606|19181|72090|29857|14990|26400|26939|70408|229906|54401|26409|18708|15507|230073|12534|14991|14997|18803|630294|27401|12427|17999|328572|17246|16179|69920|57296|433759|20422|66413|69077|69870|252870|26…	http://www.genome.jp/kegg-bin/show_pathway?mmu05169/mmu:18033%09red/mmu:12495%09red/mmu:237336%09red/mmu:224753%09red/mmu:21929%09red/mmu:19697%09red/mmu:20602%09red/mmu:20422%09red/mmu:71609%09red/mmu:19698%09red/mmu:70428%09red/mmu:15978%09red/mmu:22627%09red/mmu:19106%09red/mmu:433759%09red/mmu:18749%09red/mmu:12902%09red/mmu:20020%09red/mmu:20021%09red/mmu:20022%09red/mmu:19182%09red/mmu:1918…
Tuberculosis	KEGG PATHWAY	mmu05152	166	179	3.63e-08	3.36e-07	240354|56632|17534|20846|81897|20779|11783|15510|11984|12370|12371|12314|16160|20963|100504404|110157|18779|494124|108058|21926|29857|108960|83430|11652|12611|117149|14998|14999|16173|328572|16176|16175|16179|12266|140494|15980|12265|672195|16415|26413|26416|26417|26414|26415|27060|26419|16784|20698|15526|16783|12015|19094|69165|12315|12313|16149|225326|12795|242519|14129|19059|14127|12912|12914|…	http://www.genome.jp/kegg-bin/show_pathway?mmu05152/mmu:11972%09red/mmu:13115%09red/mmu:240354%09red/mmu:12028%09red/mmu:15974%09red/mmu:19697%09red/mmu:71609%09red/mmu:21926%09red/mmu:15978%09red/mmu:15979%09red/mmu:14969%09red/mmu:19349%09red/mmu:19345%09red/mmu:19344%09red/mmu:12611%09red/mmu:11848%09red/mmu:14082%09red/mmu:19055%09red/mmu:16706%09red/mmu:19056%09red/mmu:16149%09red/mmu:13067%…
Adrenergic signaling in cardiomyocytes	KEGG PATHWAY	mmu04261	147	152	3.92e-08	3.51e-07	14679|140781|14677|20271|20272|11548|11549|18795|18796|18797|208677|14678|18798|12314|11911|11464|56508|30955|494124|108058|29857|381290|56808|67972|22003|26931|22004|26932|59310|320707|21770|210044|11932|11550|12300|235542|226849|12323|26413|26416|71978|26415|17906|20191|59069|11607|12315|12313|621054|11938|11936|11609|11608|11931|319734|81905|81904|54652|12912|12913|12915|12916|11652|26427|1190…	http://www.genome.jp/kegg-bin/show_pathway?mmu04261/mmu:432530%09red/mmu:235542%09red/mmu:21924%09red/mmu:12296%09red/mmu:12297%09red/mmu:12294%09red/mmu:12295%09red/mmu:12292%09red/mmu:27222%09red/mmu:104111%09red/mmu:18749%09red/mmu:12298%09red/mmu:12299%09red/mmu:19054%09red/mmu:11928%09red/mmu:19053%09red/mmu:58200%09red/mmu:22004%09red/mmu:52432%09red/mmu:108058%09red/mmu:231991%09red/mmu:22…
Serotonergic synapse	KEGG PATHWAY	mmu04726	132	133	7.14e-08	6.2e-07	14679|14678|14677|11820|17161|18795|18796|18797|18798|76279|11836|16440|100066|13098|13099|271844|13097|13095|140492|13096|69888|242546|74519|72082|18176|16519|214084|226105|26417|109880|12288|232889|14697|14696|11689|11688|14693|11685|11684|11687|11686|14699|15558|26395|13110|110157|216343|81906|54652|16653|14682|14683|14681|14688|18747|224129|223864|110877|404195|18749|16521|16522|16524|15557|1…	http://www.genome.jp/kegg-bin/show_pathway?mmu04726/mmu:14401%09red/mmu:14400%09red/mmu:13110%09red/mmu:14402%09red/mmu:17161%09red/mmu:14710%09red/mmu:72082%09red/mmu:13195%09red/mmu:12292%09red/mmu:18747%09red/mmu:18749%09red/mmu:107141%09red/mmu:19224%09red/mmu:19225%09red/mmu:14708%09red/mmu:14709%09red/mmu:21990%09red/mmu:14702%09red/mmu:14700%09red/mmu:14701%09red/mmu:14706%09red/mmu:14707%…
Phospholipase D signaling pathway	KEGG PATHWAY	mmu04072	141	146	7.72e-08	6.5e-07	72318|16333|14674|14673|14389|14388|380921|18796|18797|19012|67168|18798|54635|234779|20963|19159|19158|110524|19157|110157|65086|227333|26361|14062|18805|18806|271849|14745|18803|271844|210044|64143|78134|18176|103967|320127|26413|26417|13429|232889|20698|20130|26396|211429|26395|11607|56508|22084|14823|17532|11608|18795|14127|14126|14125|16653|108071|108072|108073|56044|13430|54140|14683|11515|…	http://www.genome.jp/kegg-bin/show_pathway?mmu04072/mmu:67168%09red/mmu:380921%09red/mmu:268934%09red/mmu:78390%09red/mmu:56044%09red/mmu:64143%09red/mmu:67916%09red/mmu:14360%09red/mmu:104111%09red/mmu:20130%09red/mmu:432530%09red/mmu:19220%09red/mmu:19229%09red/mmu:28169%09red/mmu:13430%09red/mmu:14388%09red/mmu:103967%09red/mmu:68262%09red/mmu:20698%09red/mmu:54140%09red/mmu:26395%09red/mmu:26…
Insulin signaling pathway	KEGG PATHWAY	mmu04910	138	142	8.28e-08	6.69e-07	74551|12929|12928|18762|56637|70405|64930|16370|19017|12402|104215|12314|26396|22084|19268|494124|14104|11836|18679|12703|12702|53412|53413|13685|13684|110157|19062|271849|140491|19309|100705|18176|105651|26413|244416|109880|26419|12015|107746|19079|68401|26395|241113|12315|12313|110094|16890|105787|108079|16653|14121|14120|110078|26420|19047|19046|19045|18747|18576|18770|56458|14936|16150|18749|…	http://www.genome.jp/kegg-bin/show_pathway?mmu04910/mmu:13684%09red/mmu:13685%09red/mmu:22084%09red/mmu:241113%09red/mmu:16370%09red/mmu:104215%09red/mmu:64930%09red/mmu:18747%09red/mmu:18749%09red/mmu:216233%09red/mmu:68961%09red/mmu:100705%09red/mmu:16367%09red/mmu:18679%09red/mmu:16369%09red/mmu:26395%09red/mmu:14252%09red/mmu:18770%09red/mmu:23921%09red/mmu:19046%09red/mmu:110078%09red/mmu:19…
FoxO signaling pathway	KEGG PATHWAY	mmu04068	133	135	8.43e-08	6.69e-07	74551|18099|20848|54601|13611|73251|16370|12675|12176|57436|16001|18817|67731|19374|14103|19373|11836|29857|18607|93739|110157|27373|13609|27401|328572|19651|17246|18176|13197|26413|252870|26416|26417|109880|26415|12581|26419|26558|170755|19079|26557|26556|68401|26395|241113|26396|268697|16150|12795|105787|108079|12914|19211|16653|20620|17873|26420|93759|12452|56458|11920|16153|12125|16333|16334|…	http://www.genome.jp/kegg-bin/show_pathway?mmu04068/mmu:57436%09red/mmu:241113%09red/mmu:16370%09red/mmu:12176%09red/mmu:170755%09red/mmu:13197%09red/mmu:12359%09red/mmu:12452%09red/mmu:13611%09red/mmu:20620%09red/mmu:17873%09red/mmu:11920%09red/mmu:16367%09red/mmu:16369%09red/mmu:26395%09red/mmu:26396%09red/mmu:13609%09red/mmu:12581%09red/mmu:328572%09red/mmu:15469%09red/mmu:19211%09red/mmu:1546…
Transcriptional misregulation in cancer	KEGG PATHWAY	mmu05202	164	180	9.42e-08	7.27e-07	18647|15902|16185|140780|21908|268996|12775|231474|12524|19016|18791|18792|20375|15364|15396|19401|110794|21912|22029|15081|93735|17392|17395|17283|107951|12475|20683|22059|64144|67603|17246|11908|68938|229593|19208|260298|15446|433759|209446|12981|12427|97908|22642|53623|12580|17869|15182|12394|12395|12393|16409|27140|17095|12151|14129|18612|14048|545192|80859|16480|15405|15242|17132|18109|16178…	http://www.genome.jp/kegg-bin/show_pathway?mmu05202/mmu:18033%09red/mmu:14011%09red/mmu:13207%09red/mmu:18854%09red/mmu:19697%09red/mmu:19696%09red/mmu:64144%09red/mmu:53618%09red/mmu:14247%09red/mmu:18509%09red/mmu:18505%09red/mmu:433759%09red/mmu:18507%09red/mmu:18053%09red/mmu:14083%09red/mmu:15902%09red/mmu:11920%09red/mmu:15078%09red/mmu:17260%09red/mmu:14255%09red/mmu:17268%09red/mmu:209446…
AMPK signaling pathway	KEGG PATHWAY	mmu04152	128	129	1.12e-07	8.44e-07	74551|72149|18640|18641|18642|11549|16370|16846|16847|19016|19017|13631|208677|17274|30049|69008|14104|15357|26409|26931|13685|26932|21770|67605|235542|226849|100705|64930|71978|12427|12428|56421|19079|68401|241113|68365|22084|55984|22241|16890|105787|108079|12912|12913|227154|14121|14120|26427|270198|93759|57915|56690|56458|14936|100134861|16367|11450|19052|16333|16334|232493|16337|20528|52432|2…	http://www.genome.jp/kegg-bin/show_pathway?mmu04152/mmu:13685%09red/mmu:17274%09red/mmu:235542%09red/mmu:241113%09red/mmu:16370%09red/mmu:59032%09red/mmu:19054%09red/mmu:19053%09red/mmu:19052%09red/mmu:100705%09red/mmu:56690%09red/mmu:26409%09red/mmu:52432%09red/mmu:16367%09red/mmu:170768%09red/mmu:67605%09red/mmu:16369%09red/mmu:12427%09red/mmu:231991%09red/mmu:59021%09red/mmu:225849%09red/mmu:1…
Herpes simplex infection	KEGG PATHWAY	mmu05168	192	224	1.59e-07	1.15e-06	53319|110557|54721|16476|15161|19046|20847|20846|81897|71586|21374|15043|15042|15040|14985|110809|18636|12675|21402|16160|67996|13001|106759|100504404|13163|227606|14103|14102|21343|16149|14990|22029|225895|26409|14997|12534|14991|170722|407786|72504|23961|23960|630294|27401|20684|231805|328572|16176|12261|12266|14998|15980|68077|672195|14999|21354|21355|18988|252870|26414|16391|26419|20293|16992…	http://www.genome.jp/kegg-bin/show_pathway?mmu05168/mmu:228980%09red/mmu:19294%09red/mmu:237336%09red/mmu:224753%09red/mmu:15976%09red/mmu:18854%09red/mmu:15975%09red/mmu:19697%09red/mmu:407786%09red/mmu:12753%09red/mmu:21926%09red/mmu:15978%09red/mmu:15979%09red/mmu:110696%09red/mmu:19106%09red/mmu:14082%09red/mmu:20020%09red/mmu:21354%09red/mmu:16149%09red/mmu:13067%09red/mmu:54131%09red/mmu:13…
Influenza A	KEGG PATHWAY	mmu05164	157	172	1.61e-07	1.15e-06	53319|16476|54721|66679|54196|20847|20846|18550|67373|15511|71586|15512|22072|77125|12371|11465|16160|81489|11461|106759|100504404|53817|18815|14103|14102|237082|214523|21926|29857|54123|26400|12702|56637|16647|18708|230073|170722|17858|103573|23961|23960|14998|14999|16173|328572|16176|16175|228607|15980|12265|672195|214531|269966|26413|26416|26417|26414|26415|26419|20293|26395|26397|26396|110157…	http://www.genome.jp/kegg-bin/show_pathway?mmu05164/mmu:217069%09red/mmu:67373%09red/mmu:18033%09red/mmu:15976%09red/mmu:18854%09red/mmu:15975%09red/mmu:19697%09red/mmu:21926%09red/mmu:15978%09red/mmu:15979%09red/mmu:53817%09red/mmu:19106%09red/mmu:66679%09red/mmu:13067%09red/mmu:17874%09red/mmu:20293%09red/mmu:15945%09red/mmu:14960%09red/mmu:14961%09red/mmu:14969%09red/mmu:26395%09red/mmu:26396%…
Sphingolipid signaling pathway	KEGG PATHWAY	mmu04071	124	125	1.77e-07	1.23e-06	93898|14678|14677|18762|14673|11542|20773|18795|18796|18797|14679|18798|26396|70059|13244|18386|56632|67260|230379|29857|26408|12062|26931|26932|18805|18806|11652|21770|13609|81535|619326|235542|226849|241447|18176|26413|19878|26416|11886|26414|26415|26419|19877|208449|20698|170758|13610|13611|26395|54447|110157|20597|17250|20598|14125|19353|19354|14127|14126|228677|19211|16653|94226|268656|26420…	http://www.genome.jp/kegg-bin/show_pathway?mmu04071/mmu:268656%09red/mmu:235542%09red/mmu:12028%09red/mmu:11539%09red/mmu:19697%09red/mmu:170758%09red/mmu:71609%09red/mmu:433323%09red/mmu:21926%09red/mmu:59032%09red/mmu:93898%09red/mmu:14360%09red/mmu:13611%09red/mmu:13610%09red/mmu:19054%09red/mmu:19053%09red/mmu:19052%09red/mmu:228677%09red/mmu:14389%09red/mmu:52432%09red/mmu:76893%09red/mmu:20…
Spliceosome	KEGG PATHWAY	mmu03040	131	135	1.83e-07	1.24e-06	64340|56031|107686|53317|319322|68879|15511|60365|81898|545388|68981|110809|68988|433702|67996|78651|66373|53817|70052|66877|14105|66642|11834|73666|66125|231889|665989|66070|192170|72654|19656|19655|20384|55934|71713|68816|434080|66492|17149|69878|15512|233073|66094|28035|54633|217207|15482|70767|67678|652988|68092|101943|320632|66810|56194|67958|67959|20624|56215|229279|71702|192159|20227|28000…	http://www.genome.jp/kegg-bin/show_pathway?mmu03040/mmu:192159%09red/mmu:67678%09red/mmu:331401%09red/mmu:13207%09red/mmu:13204%09red/mmu:81898%09red/mmu:72047%09red/mmu:108121%09red/mmu:53817%09red/mmu:23983%09red/mmu:75062%09red/mmu:20624%09red/mmu:107701%09red/mmu:74351%09red/mmu:20383%09red/mmu:229279%09red/mmu:50783%09red/mmu:28000%09red/mmu:68879%09red/mmu:66585%09red/mmu:225160%09red/mmu:5…
Lysosome	KEGG PATHWAY	mmu04142	123	124	1.98e-07	1.31e-06	110006|83429|71665|56325|18010|11781|11782|67963|11305|11984|27419|56722|67464|19156|15932|15931|56629|67300|14667|432486|17159|19063|15212|15211|140494|14466|11778|11775|11774|11777|11776|18173|18174|52120|229445|11883|11881|12091|11886|74008|27060|16541|13423|16784|74325|100862375|11605|11768|11769|15586|20597|11766|11767|11764|11765|214505|19025|27426|75612|16792|12514|252903|12512|13038|13039…	http://www.genome.jp/kegg-bin/show_pathway?mmu04142/mmu:27419%09red/mmu:11433%09red/mmu:11432%09red/mmu:83429%09red/mmu:12512%09red/mmu:27029%09red/mmu:12514%09red/mmu:55946%09red/mmu:12751%09red/mmu:67963%09red/mmu:12757%09red/mmu:67300%09red/mmu:252903%09red/mmu:14387%09red/mmu:432486%09red/mmu:56464%09red/mmu:11984%09red/mmu:13034%09red/mmu:50917%09red/mmu:15211%09red/mmu:17775%09red/mmu:11412…
Apoptosis	KEGG PATHWAY	mmu04210	133	139	2.49e-07	1.57e-06	18646|16476|13368|11546|11545|12370|12371|12675|11465|11461|13163|14103|14102|26408|238463|64704|672195|18176|11783|229445|26413|12984|12983|26417|26414|26926|26419|12018|12015|26395|58801|26396|110157|16150|18952|20740|16653|78943|22029|17873|22145|22146|22147|22142|26420|57913|11911|13665|13666|21926|14281|13038|328417|11920|14939|13036|12122|13030|13032|13033|22030|22035|20739|18211|18607|1969…	http://www.genome.jp/kegg-bin/show_pathway?mmu04210/mmu:19249%09red/mmu:12028%09red/mmu:19697%09red/mmu:71609%09red/mmu:21926%09red/mmu:13197%09red/mmu:238463%09red/mmu:69601%09red/mmu:14082%09red/mmu:78943%09red/mmu:17873%09red/mmu:11920%09red/mmu:12122%09red/mmu:13041%09red/mmu:26395%09red/mmu:26396%09red/mmu:19766%09red/mmu:16440%09red/mmu:15461%09red/mmu:13030%09red/mmu:13033%09red/mmu:13032%…
Neurotrophin signaling pathway	KEGG PATHWAY	mmu04722	121	122	2.49e-07	1.57e-06	16476|12929|12928|56637|14570|17164|70405|18053|12070|11911|65020|12315|192662|20399|110157|14103|327826|108058|29857|108960|26401|26400|26406|26408|12064|271849|18803|109905|67071|78405|18176|26413|26416|26417|26414|26415|26419|20111|20112|12015|107746|26395|12314|26396|12313|19353|215449|16653|109880|26420|19164|19165|16179|22062|11350|12323|12322|12326|12325|16150|192656|14388|22034|22627|1821…	http://www.genome.jp/kegg-bin/show_pathway?mmu04722/mmu:17164%09red/mmu:12028%09red/mmu:19697%09red/mmu:18211%09red/mmu:18212%09red/mmu:18213%09red/mmu:18053%09red/mmu:72843%09red/mmu:14570%09red/mmu:11857%09red/mmu:14388%09red/mmu:16367%09red/mmu:108058%09red/mmu:65020%09red/mmu:26395%09red/mmu:26396%09red/mmu:19353%09red/mmu:23921%09red/mmu:23939%09red/mmu:23938%09red/mmu:16179%09red/mmu:170936…
Ubiquitin mediated proteolysis	KEGG PATHWAY	mmu04120	137	145	2.67e-07	1.65e-06	69010|19823|76375|107568|59004|69957|71991|73318|381534|59008|15204|12402|231672|21402|63958|52206|66156|26401|12703|12702|56371|117146|56438|27401|83814|17999|74153|17246|75788|268470|70790|56228|140499|242521|229615|50873|17222|99375|67030|76980|106052|26374|56424|26554|74126|67673|68098|68729|17318|231380|50868|17237|70093|20437|246710|71745|20438|73998|109161|66894|28000|16396|107995|22034|72…	http://www.genome.jp/kegg-bin/show_pathway?mmu04120/mmu:71991%09red/mmu:107986%09red/mmu:12211%09red/mmu:18854%09red/mmu:13194%09red/mmu:22200%09red/mmu:381534%09red/mmu:117146%09red/mmu:73998%09red/mmu:50995%09red/mmu:107995%09red/mmu:11634%09red/mmu:217342%09red/mmu:28000%09red/mmu:230904%09red/mmu:69957%09red/mmu:67673%09red/mmu:246710%09red/mmu:59026%09red/mmu:52206%09red/mmu:69807%09red/mmu:…
Jak-STAT signaling pathway	KEGG PATHWAY	mmu04630	147	161	3.87e-07	2.31e-06	20849|20848|54721|20847|54607|20844|59004|110157|16846|16847|16161|16160|16163|16162|16165|16164|16169|16168|20851|213043|237310|239114|213208|20846|12700|12703|12702|56324|329244|14580|83430|17480|16878|328572|209590|18414|18413|15980|13019|13856|13857|71872|229615|12986|12985|12984|12983|12982|12981|14599|60504|60505|17869|14199|230828|20850|237313|20852|11761|242519|387510|21832|12914|230405|3…	http://www.genome.jp/kegg-bin/show_pathway?mmu04630/mmu:100038993%09red/mmu:192157%09red/mmu:15976%09red/mmu:15974%09red/mmu:15975%09red/mmu:213208%09red/mmu:213043%09red/mmu:15978%09red/mmu:15979%09red/mmu:71724%09red/mmu:60505%09red/mmu:16165%09red/mmu:13857%09red/mmu:19109%09red/mmu:15170%09red/mmu:50929%09red/mmu:12803%09red/mmu:16878%09red/mmu:16162%09red/mmu:242700%09red/mmu:83430%09red/mmu…
Dopaminergic synapse	KEGG PATHWAY	mmu04728	129	135	3.91e-07	2.31e-06	14679|14678|14677|56637|208677|70405|17161|18795|18796|18797|16572|18798|13489|13488|52432|13162|494124|108058|29857|16574|26931|16573|26932|21770|13492|13491|226849|216869|214084|26416|71978|26414|26415|53623|26419|606496|14695|14697|14696|14693|14699|12314|12315|12313|11865|12912|12913|12915|26427|12846|26420|235542|14682|14683|19049|11911|19047|19046|19045|20265|14688|18747|12322|14281|224129|…	http://www.genome.jp/kegg-bin/show_pathway?mmu04728/mmu:14709%09red/mmu:17161%09red/mmu:14710%09red/mmu:235542%09red/mmu:12753%09red/mmu:13195%09red/mmu:59032%09red/mmu:18747%09red/mmu:18749%09red/mmu:19055%09red/mmu:19054%09red/mmu:19057%09red/mmu:19056%09red/mmu:19053%09red/mmu:19052%09red/mmu:14708%09red/mmu:224129%09red/mmu:14702%09red/mmu:14700%09red/mmu:14701%09red/mmu:14706%09red/mmu:14800…
Thyroid hormone signaling pathway	KEGG PATHWAY	mmu04919	116	117	4.39e-07	2.54e-06	54720|18640|327987|20846|56637|69790|19014|12371|18796|18797|114875|18798|18799|20779|11465|11461|22084|58807|110157|18802|18803|14463|12387|328572|17246|18176|433759|26413|16416|26417|20502|76199|67381|17869|15182|20182|12015|56421|107585|26395|26396|12159|11938|11936|329650|11933|11932|11931|18795|16653|21833|12914|21834|210789|22417|72472|20185|17979|20183|20181|17977|13982|18747|56458|18749|2…	http://www.genome.jp/kegg-bin/show_pathway?mmu04919/mmu:13982%09red/mmu:18131%09red/mmu:18747%09red/mmu:23989%09red/mmu:433759%09red/mmu:18749%09red/mmu:11928%09red/mmu:17977%09red/mmu:17978%09red/mmu:17979%09red/mmu:15251%09red/mmu:59024%09red/mmu:22417%09red/mmu:26395%09red/mmu:26396%09red/mmu:328572%09red/mmu:17869%09red/mmu:11938%09red/mmu:20183%09red/mmu:20182%09red/mmu:20181%09red/mmu:68975…
Platelet activation	KEGG PATHWAY	mmu04611	120	123	4.86e-07	2.75e-06	14679|14678|14677|22371|54195|20779|108101|243816|18795|18796|18797|19395|18798|11465|20963|11461|18762|29857|67268|22320|12825|14065|14062|60596|271844|210044|19419|109905|54519|20619|99571|26413|19878|16416|26416|26417|26415|19877|232889|211429|17096|70549|215449|14127|239134|110135|12842|12843|14729|14682|14683|11515|19046|19045|14724|11513|11512|18747|224129|16398|16399|18749|16439|16438|1416…	http://www.genome.jp/kegg-bin/show_pathway?mmu04611/mmu:432530%09red/mmu:78390%09red/mmu:18747%09red/mmu:14360%09red/mmu:104111%09red/mmu:18749%09red/mmu:19222%09red/mmu:12825%09red/mmu:19224%09red/mmu:21391%09red/mmu:99571%09red/mmu:12229%09red/mmu:213435%09red/mmu:239134%09red/mmu:20619%09red/mmu:110135%09red/mmu:19046%09red/mmu:19045%09red/mmu:16416%09red/mmu:434233%09red/mmu:60596%09red/mmu:1…
Hepatitis B	KEGG PATHWAY	mmu05161	136	146	4.96e-07	2.76e-06	16476|20849|20848|20847|20846|20779|11783|18019|18018|12370|12371|12675|208677|11911|19645|110957|110157|14103|14102|26401|17395|230073|11652|117149|13557|13555|328572|228607|672195|18176|15530|26413|26417|26414|12427|12428|26419|71586|17869|12015|26395|26396|20850|20851|20852|26398|242519|19211|12447|16653|12912|12913|12914|68576|12915|17874|26427|26420|12575|21926|14281|54411|16150|16151|142980…	http://www.genome.jp/kegg-bin/show_pathway?mmu05161/mmu:18033%09red/mmu:107986%09red/mmu:13205%09red/mmu:12028%09red/mmu:15974%09red/mmu:15975%09red/mmu:19697%09red/mmu:21926%09red/mmu:13194%09red/mmu:14082%09red/mmu:13067%09red/mmu:117149%09red/mmu:19229%09red/mmu:17874%09red/mmu:225471%09red/mmu:242705%09red/mmu:12427%09red/mmu:231991%09red/mmu:26395%09red/mmu:26396%09red/mmu:26398%09red/mmu:32…
Cell cycle	KEGG PATHWAY	mmu04110	121	125	5.69e-07	3.1e-06	69010|20843|211586|56637|66671|105988|69957|59008|30939|66440|21402|50793|56150|20842|18817|52206|50883|66156|13559|56371|12534|13006|12532|12530|56438|27401|13557|13555|19650|328572|17246|18392|18393|13197|17220|17222|12427|12428|22390|12581|12580|218294|17869|15182|19651|19357|12914|104394|26429|26428|433759|12649|11350|11920|56452|107995|22627|22629|22628|17873|17128|12567|17120|17126|17127|22…	http://www.genome.jp/kegg-bin/show_pathway?mmu04110/mmu:50793%09red/mmu:23834%09red/mmu:55948%09red/mmu:13197%09red/mmu:66671%09red/mmu:433759%09red/mmu:17873%09red/mmu:11920%09red/mmu:107995%09red/mmu:15182%09red/mmu:242705%09red/mmu:69957%09red/mmu:12427%09red/mmu:22390%09red/mmu:52206%09red/mmu:19357%09red/mmu:12580%09red/mmu:12581%09red/mmu:328572%09red/mmu:12428%09red/mmu:229776%09red/mmu:17…
Carbon metabolism	KEGG PATHWAY	mmu01200	116	118	5.81e-07	3.11e-06	20917|20916|18642|60525|17769|72141|18648|14751|74419|13807|230163|74147|18641|110639|12359|73724|100678|75731|18563|14661|18770|66646|76282|66052|15112|109264|11674|11676|17850|19895|67078|68738|11532|104174|231691|21351|56185|15929|328099|13806|100042427|20425|108682|107272|21991|56421|11364|100039229|14194|13382|104776|227231|66904|14121|14120|68263|18746|11611|56451|83553|66945|17436|14381|14…	http://www.genome.jp/kegg-bin/show_pathway?mmu01200/mmu:14719%09red/mmu:14718%09red/mmu:17769%09red/mmu:20425%09red/mmu:11532%09red/mmu:110639%09red/mmu:12359%09red/mmu:107029%09red/mmu:243996%09red/mmu:231691%09red/mmu:21351%09red/mmu:17448%09red/mmu:73724%09red/mmu:68738%09red/mmu:18293%09red/mmu:11428%09red/mmu:11429%09red/mmu:14380%09red/mmu:14381%09red/mmu:434437%09red/mmu:66646%09red/mmu:66…
Tight junction	KEGG PATHWAY	mmu04530	132	141	6.05e-07	3.17e-06	58220|77579|140781|14677|18762|17475|20779|60363|14679|14678|11465|50791|11461|13000|65964|71908|15163|67268|93737|60595|74094|59310|27375|12385|12387|12386|11474|71774|11472|18417|75723|18176|17883|71978|53624|17906|16897|99470|68328|239931|14924|17532|74987|20742|16653|19211|56217|20336|12995|27428|83964|17879|71960|30960|544791|110380|52432|12738|12739|224912|73699|67374|20130|12737|23797|1097…	http://www.genome.jp/kegg-bin/show_pathway?mmu04530/mmu:67374%09red/mmu:50791%09red/mmu:12695%09red/mmu:71774%09red/mmu:224912%09red/mmu:54420%09red/mmu:20130%09red/mmu:17879%09red/mmu:667772%09red/mmu:70737%09red/mmu:19053%09red/mmu:19052%09red/mmu:20742%09red/mmu:83964%09red/mmu:75723%09red/mmu:99470%09red/mmu:17475%09red/mmu:239931%09red/mmu:12740%09red/mmu:12741%09red/mmu:72058%09red/mmu:5447…
Inflammatory mediator regulation of TRP channels	KEGG PATHWAY	mmu04750	121	126	7.43e-07	3.83e-06	18761|20779|18795|18796|18797|22368|18798|12314|234779|494124|108058|29857|241118|12061|12062|14063|100066|13098|13099|13096|13097|13095|271844|69888|16177|210044|242546|72082|666168|226105|26414|26415|26419|232889|211429|11685|11684|26397|12315|12313|16176|26399|19219|19217|193034|246788|26420|14682|14683|11515|19046|19045|18803|11513|11512|18747|12322|224129|12325|404195|18749|53357|70405|58170…	http://www.genome.jp/kegg-bin/show_pathway?mmu04750/mmu:13110%09red/mmu:53357%09red/mmu:666168%09red/mmu:13117%09red/mmu:432530%09red/mmu:13118%09red/mmu:13119%09red/mmu:18708%09red/mmu:78390%09red/mmu:241118%09red/mmu:63873%09red/mmu:18211%09red/mmu:104111%09red/mmu:18749%09red/mmu:18709%09red/mmu:107141%09red/mmu:246788%09red/mmu:22368%09red/mmu:193034%09red/mmu:242546%09red/mmu:108058%09red/mm…
Glutamatergic synapse	KEGG PATHWAY	mmu04724	113	115	8.17e-07	4.13e-06	14679|14678|14677|26557|18795|18796|18797|18798|110637|14660|20511|20510|20513|20512|18805|18806|271844|210044|232889|72961|67760|320129|26413|26417|53623|14695|14697|14696|14693|211429|14699|26556|210274|13385|216456|14823|108071|108072|108073|14682|14683|14681|11515|11514|11513|11512|18747|242443|224129|242607|18749|108069|108068|329502|224997|16439|16438|19058|19059|102238433|19055|19056|19057…	http://www.genome.jp/kegg-bin/show_pathway?mmu04724/mmu:14645%09red/mmu:432530%09red/mmu:14710%09red/mmu:224997%09red/mmu:76257%09red/mmu:110637%09red/mmu:18747%09red/mmu:104111%09red/mmu:18749%09red/mmu:19055%09red/mmu:19057%09red/mmu:19056%09red/mmu:19059%09red/mmu:19058%09red/mmu:14708%09red/mmu:14709%09red/mmu:14809%09red/mmu:14702%09red/mmu:14700%09red/mmu:14806%09red/mmu:14706%09red/mmu:148…
Vascular smooth muscle contraction	KEGG PATHWAY	mmu04270	122	128	8.64e-07	4.24e-06	18761|54195|14673|14672|12314|54598|11541|11548|11549|18795|18796|18797|18798|11607|26396|56089|11468|110157|18778|14674|494124|18160|11836|72413|26361|60596|271844|210044|26565|11540|11475|329251|666168|26413|19878|26417|109880|17904|19877|232889|211429|230103|13617|26395|58802|12315|12313|100502876|216459|11608|54652|239134|54140|14682|14683|11515|19046|19045|237625|11513|11512|18747|224129|187…	http://www.genome.jp/kegg-bin/show_pathway?mmu04270/mmu:53357%09red/mmu:666168%09red/mmu:13117%09red/mmu:432530%09red/mmu:13118%09red/mmu:13119%09red/mmu:237625%09red/mmu:78390%09red/mmu:12292%09red/mmu:18747%09red/mmu:104111%09red/mmu:13617%09red/mmu:18749%09red/mmu:19222%09red/mmu:213435%09red/mmu:239134%09red/mmu:54140%09red/mmu:26395%09red/mmu:26396%09red/mmu:216459%09red/mmu:18778%09red/mmu:…
Insulin resistance	KEGG PATHWAY	mmu04931	110	111	8.7e-07	4.24e-06	74551|20848|18761|18762|56637|232493|19017|19013|22260|19268|208104|110651|12702|53412|14584|208677|14583|26568|26569|140491|19309|67071|22259|100705|105651|244416|26414|26419|20111|20112|19079|68401|241113|58805|105787|19211|108079|12912|12913|210789|170826|26427|110078|26420|19047|19046|19045|21926|56458|14936|100134861|16150|76055|16333|16334|20525|20526|16337|20528|18607|19697|72508|23797|187…	http://www.genome.jp/kegg-bin/show_pathway?mmu04931/mmu:241113%09red/mmu:19697%09red/mmu:26459%09red/mmu:26458%09red/mmu:21926%09red/mmu:20112%09red/mmu:100705%09red/mmu:228775%09red/mmu:225579%09red/mmu:16367%09red/mmu:231991%09red/mmu:22259%09red/mmu:19046%09red/mmu:19045%09red/mmu:19211%09red/mmu:26457%09red/mmu:74343%09red/mmu:12894%09red/mmu:12895%09red/mmu:23797%09red/mmu:18761%09red/mmu:16…
Huntington's disease	KEGG PATHWAY	mmu05016	170	199	9.01e-07	4.32e-06	105675|67273|19712|245841|110323|11783|21374|12370|12371|19016|18797|231329|208677|71770|18798|69654|330355|56087|227197|66377|227606|66152|67264|70316|67300|13411|13417|15114|12064|407785|15194|17995|17993|17992|17991|20683|68194|22272|22273|328572|66576|11771|11773|11772|110082|672195|67942|433759|66414|66142|12859|12858|225887|66495|69875|66491|333182|12857|19017|105000|69241|627872|74325|7833…	http://www.genome.jp/kegg-bin/show_pathway?mmu05016/mmu:228980%09red/mmu:18181%09red/mmu:226646%09red/mmu:237336%09red/mmu:12028%09red/mmu:73333%09red/mmu:407785%09red/mmu:66414%09red/mmu:12757%09red/mmu:54152%09red/mmu:433759%09red/mmu:110323%09red/mmu:22227%09red/mmu:20020%09red/mmu:20021%09red/mmu:20022%09red/mmu:67300%09red/mmu:66576%09red/mmu:14682%09red/mmu:13067%09red/mmu:13063%09red/mmu:5…
Phagosome	KEGG PATHWAY	mmu04145	164	192	1.39e-06	6.53e-06	110557|17534|20387|15024|17167|20778|11984|15043|15042|15040|14985|11465|14130|11461|100504404|18779|140792|19345|20288|238463|21825|14990|14991|14997|140494|14999|234663|630294|73710|21354|21355|66144|22153|22152|22151|16416|16410|22154|27060|13426|13424|16419|16784|16783|17113|235661|12317|69165|225326|19353|67951|108078|14998|14129|22143|16402|22145|22146|22147|12721|12845|226421|15239|271457|…	http://www.genome.jp/kegg-bin/show_pathway?mmu04145/mmu:17167%09red/mmu:22154%09red/mmu:22152%09red/mmu:22153%09red/mmu:22151%09red/mmu:224753%09red/mmu:14972%09red/mmu:76252%09red/mmu:14964%09red/mmu:19349%09red/mmu:238463%09red/mmu:19345%09red/mmu:19344%09red/mmu:20333%09red/mmu:20335%09red/mmu:21355%09red/mmu:21354%09red/mmu:17972%09red/mmu:71116%09red/mmu:224761%09red/mmu:100529082%09red/mmu:…
Alzheimer's disease	KEGG PATHWAY	mmu05010	154	177	1.41e-06	6.53e-06	17762|208117|67273|53313|11820|56637|11785|70405|110323|11783|68318|12370|12371|18796|18797|226548|18798|227197|66377|66152|67264|14102|494124|407785|17995|17993|17992|17991|16971|68194|22272|22273|16176|66576|234664|672195|20617|15925|66414|66142|100042427|12859|26413|225887|66495|69875|26417|15108|17380|59287|12857|66091|20192|78330|54652|100039229|407790|12314|12315|12313|11938|11937|104130|12…	http://www.genome.jp/kegg-bin/show_pathway?mmu05010/mmu:11820%09red/mmu:226646%09red/mmu:226641%09red/mmu:70405%09red/mmu:407785%09red/mmu:17762%09red/mmu:21926%09red/mmu:12292%09red/mmu:110323%09red/mmu:14082%09red/mmu:19055%09red/mmu:19057%09red/mmu:19056%09red/mmu:66576%09red/mmu:78943%09red/mmu:19059%09red/mmu:13063%09red/mmu:12122%09red/mmu:595136%09red/mmu:68349%09red/mmu:28080%09red/mmu:20…
T cell receptor signaling pathway	KEGG PATHWAY	mmu04660	104	105	1.72e-06	7.86e-06	240354|16476|12487|19264|18761|56637|18019|18018|12525|12526|12675|13383|18481|29857|18566|26400|26409|16822|18803|22325|19419|18479|18176|26413|26410|26416|26417|12981|26415|12503|12502|12501|12500|12504|26395|26396|110157|23797|16653|214230|26420|16818|17974|17973|21926|14281|16150|16151|16153|21947|18607|19697|19056|19058|19059|21682|19055|12567|19057|67653|53859|54167|22637|12402|14784|16183|…	http://www.genome.jp/kegg-bin/show_pathway?mmu04660/mmu:16818%09red/mmu:240354%09red/mmu:12477%09red/mmu:19697%09red/mmu:21926%09red/mmu:15978%09red/mmu:14360%09red/mmu:15170%09red/mmu:19055%09red/mmu:19057%09red/mmu:17973%09red/mmu:17974%09red/mmu:19059%09red/mmu:19058%09red/mmu:12502%09red/mmu:12503%09red/mmu:12500%09red/mmu:12501%09red/mmu:12504%09red/mmu:214230%09red/mmu:26395%09red/mmu:26396…
HIF-1 signaling pathway	KEGG PATHWAY	mmu04066	107	110	2.13e-06	9.44e-06	20848|18641|17000|15368|234779|21857|108058|13685|13684|11674|56438|18803|71775|328572|15980|13856|100042427|26413|26417|237038|13614|100039229|18597|26395|67673|26396|11601|11600|11602|21687|112406|112407|112405|12914|68263|12322|12325|230899|16333|16334|20525|16337|19697|18598|67923|72508|23797|14433|58988|26987|18752|18750|18751|16000|16001|433182|14254|13645|22041|18126|22042|13807|13806|1364…	http://www.genome.jp/kegg-bin/show_pathway?mmu04066/mmu:13684%09red/mmu:13685%09red/mmu:67673%09red/mmu:19697%09red/mmu:15978%09red/mmu:15979%09red/mmu:13866%09red/mmu:13614%09red/mmu:15251%09red/mmu:21857%09red/mmu:108058%09red/mmu:170768%09red/mmu:13856%09red/mmu:14254%09red/mmu:26395%09red/mmu:26396%09red/mmu:328572%09red/mmu:17000%09red/mmu:216019%09red/mmu:13058%09red/mmu:218268%09red/mmu:21…
Osteoclast differentiation	KEGG PATHWAY	mmu04380	123	133	2.14e-06	9.44e-06	16477|16476|19261|54721|20847|20846|16478|22177|18019|18018|320832|12675|20375|234779|20963|100038947|18383|22030|29857|74256|12703|12702|26409|83433|16176|16177|16175|18412|15980|232801|26413|16416|26416|26417|26414|26415|14200|26419|26395|12311|26399|19353|14129|23797|12912|19016|26420|68652|14728|17969|17970|17972|14282|21926|14281|13038|12326|14284|16150|16151|18725|14389|18726|22034|21943|14…	http://www.genome.jp/kegg-bin/show_pathway?mmu04380/mmu:18033%09red/mmu:11433%09red/mmu:16818%09red/mmu:15976%09red/mmu:26400%09red/mmu:15975%09red/mmu:19697%09red/mmu:19698%09red/mmu:21926%09red/mmu:15978%09red/mmu:15979%09red/mmu:14360%09red/mmu:19055%09red/mmu:19057%09red/mmu:19056%09red/mmu:19059%09red/mmu:19058%09red/mmu:12229%09red/mmu:14389%09red/mmu:83433%09red/mmu:26395%09red/mmu:26399%0…
Cholinergic synapse	KEGG PATHWAY	mmu04725	109	113	2.22e-06	9.66e-06	14679|14678|14677|14672|18795|18796|18797|18798|11911|108058|208677|60613|12669|210044|18176|26413|20508|26417|14695|14697|14696|14693|14699|26395|11441|11440|11444|110862|63993|54652|12912|12913|16653|12647|26427|14682|14681|11515|11514|11513|11512|18747|12322|14281|224129|12326|12325|18749|16520|16522|12671|16439|16438|66066|23797|211480|18750|18751|18752|11423|16536|16535|14707|14706|64337|147…	http://www.genome.jp/kegg-bin/show_pathway?mmu04725/mmu:11438%09red/mmu:432530%09red/mmu:14710%09red/mmu:211480%09red/mmu:12292%09red/mmu:18747%09red/mmu:14360%09red/mmu:104111%09red/mmu:18749%09red/mmu:20508%09red/mmu:16515%09red/mmu:14708%09red/mmu:14709%09red/mmu:14702%09red/mmu:14700%09red/mmu:14701%09red/mmu:14706%09red/mmu:16518%09red/mmu:14704%09red/mmu:11423%09red/mmu:108058%09red/mmu:110…
Amoebiasis	KEGG PATHWAY	mmu05146	107	111	2.79e-06	1.19e-05	94216|14676|14675|14672|12830|14268|18795|18796|18797|18798|97848|12279|16160|16779|16772|16773|16774|16775|16776|16777|12828|12829|12825|12826|12827|15507|241197|241196|60595|380839|11474|11472|16177|16178|226519|69379|16415|16414|12981|230558|16780|16782|16176|12842|12843|109711|16409|226421|14682|14683|14680|271457|18747|21926|14083|110382|16153|18749|66222|19349|19344|19345|19697|24088|18750|…	http://www.genome.jp/kegg-bin/show_pathway?mmu05146/mmu:16773%09red/mmu:16772%09red/mmu:16775%09red/mmu:16774%09red/mmu:16777%09red/mmu:16776%09red/mmu:432530%09red/mmu:19697%09red/mmu:21926%09red/mmu:15978%09red/mmu:19349%09red/mmu:18747%09red/mmu:69379%09red/mmu:19345%09red/mmu:19344%09red/mmu:18749%09red/mmu:241196%09red/mmu:241197%09red/mmu:14083%09red/mmu:16779%09red/mmu:12825%09red/mmu:1282…
Phosphatidylinositol signaling system	KEGG PATHWAY	mmu04070	97	97	2.89e-06	1.22e-05	16330|76500|240752|114663|380921|18796|18797|114875|74302|18798|18799|234779|269180|110524|494124|12314|227333|77116|19062|18802|18803|228550|224020|320127|242291|17772|117150|55980|12315|12313|320404|225326|233011|18795|19211|16329|67073|107650|234515|27399|170749|217837|97287|53332|13139|104015|64436|16331|16332|70405|18720|72469|170835|16439|16438|212111|227399|320634|271424|18750|18751|18752|…	http://www.genome.jp/kegg-bin/show_pathway?mmu04070/mmu:219135%09red/mmu:380921%09red/mmu:97287%09red/mmu:219024%09red/mmu:54384%09red/mmu:320634%09red/mmu:17772%09red/mmu:240752%09red/mmu:107650%09red/mmu:19211%09red/mmu:16440%09red/mmu:212111%09red/mmu:52858%09red/mmu:70405%09red/mmu:53332%09red/mmu:16331%09red/mmu:18707%09red/mmu:74055%09red/mmu:16332%09red/mmu:114875%09red/mmu:271424%09red/mm…
Retrograde endocannabinoid signaling	KEGG PATHWAY	mmu04723	101	103	3.21e-06	1.33e-05	14679|14678|14677|14073|14800|18796|18797|18798|14396|110886|29857|66082|210044|72961|26413|26416|26417|26414|26415|53623|26419|14695|14697|14696|14693|54652|14699|231871|18795|108071|23945|26420|269060|14682|14681|11515|11514|11513|11512|116837|224129|18749|16521|16522|16524|16439|16438|18750|18751|18752|57249|140919|14707|14706|64337|14704|14702|14701|14700|242864|100043318|14709|14708|14816|19…	http://www.genome.jp/kegg-bin/show_pathway?mmu04723/mmu:14401%09red/mmu:14394%09red/mmu:14403%09red/mmu:14396%09red/mmu:14405%09red/mmu:14404%09red/mmu:14407%09red/mmu:14400%09red/mmu:432530%09red/mmu:14710%09red/mmu:14399%09red/mmu:14397%09red/mmu:14402%09red/mmu:12292%09red/mmu:18747%09red/mmu:104111%09red/mmu:18749%09red/mmu:14409%09red/mmu:14408%09red/mmu:14708%09red/mmu:14709%09red/mmu:14702…
Oocyte meiosis	KEGG PATHWAY	mmu04114	110	116	3.37e-06	1.38e-05	69010|16333|69957|59008|30939|114875|21402|19056|56150|18817|52206|494124|66156|67579|108058|11835|29857|330228|72415|26931|26932|12534|13006|12532|21770|56438|210044|56739|67071|226849|50878|18667|12323|17222|110651|26413|26417|20111|20112|140557|67141|26395|12314|12315|12313|12447|241634|11515|19046|19045|11513|11512|18747|12322|224129|12325|19052|18749|12877|107995|16334|22627|22629|22628|7369…	http://www.genome.jp/kegg-bin/show_pathway?mmu04114/mmu:74673%09red/mmu:432530%09red/mmu:18667%09red/mmu:114875%09red/mmu:18747%09red/mmu:104111%09red/mmu:18749%09red/mmu:19055%09red/mmu:19057%09red/mmu:19056%09red/mmu:19053%09red/mmu:19052%09red/mmu:19059%09red/mmu:19058%09red/mmu:107995%09red/mmu:108058%09red/mmu:69957%09red/mmu:26395%09red/mmu:52206%09red/mmu:231207%09red/mmu:225849%09red/mmu:…
TNF signaling pathway	KEGG PATHWAY	mmu04668	107	112	3.65e-06	1.47e-05	16477|16476|72542|12370|12675|208677|11911|73086|14102|29857|26400|12702|26409|26408|17392|17395|16878|17387|432555|11909|56532|26413|26410|26416|26417|12981|26415|74006|20297|26419|20293|67384|13614|26395|26397|16176|26399|26398|12912|12913|12915|22029|14825|26427|26420|68652|21926|14281|16396|16150|16151|21929|22030|22031|22033|15894|66724|15945|19697|12633|23797|20339|320207|19766|21937|21938|…	http://www.genome.jp/kegg-bin/show_pathway?mmu04668/mmu:21929%09red/mmu:19697%09red/mmu:71609%09red/mmu:21926%09red/mmu:17387%09red/mmu:13614%09red/mmu:69601%09red/mmu:14082%09red/mmu:19225%09red/mmu:16878%09red/mmu:20297%09red/mmu:20293%09red/mmu:15945%09red/mmu:16992%09red/mmu:231991%09red/mmu:26395%09red/mmu:26397%09red/mmu:26398%09red/mmu:26399%09red/mmu:16176%09red/mmu:19766%09red/mmu:23797%…
Leukocyte transendothelial migration	KEGG PATHWAY	mmu04670	113	121	4.01e-06	1.59e-05	12927|14678|14677|54354|60363|14679|16412|11465|67374|11461|11855|71908|29857|67268|22165|17390|17395|60595|59310|12388|18803|12385|12387|12386|109905|19303|11472|18417|19353|16415|16414|19878|26416|26415|19877|17906|19354|11474|239931|56508|13057|74987|21838|215449|18613|74734|16401|83964|16408|16409|17970|17972|223864|15894|12738|12739|232906|12737|234779|109711|17969|12562|18752|18750|18751|54…	http://www.genome.jp/kegg-bin/show_pathway?mmu04670/mmu:67374%09red/mmu:54420%09red/mmu:14083%09red/mmu:17970%09red/mmu:17972%09red/mmu:19229%09red/mmu:69524%09red/mmu:11855%09red/mmu:83964%09red/mmu:54419%09red/mmu:12740%09red/mmu:12741%09red/mmu:19354%09red/mmu:19353%09red/mmu:18260%09red/mmu:17906%09red/mmu:13057%09red/mmu:60595%09red/mmu:13058%09red/mmu:60363%09red/mmu:16428%09red/mmu:242653%…
Glycerophospholipid metabolism	KEGG PATHWAY	mmu00564	94	94	4.07e-06	1.59e-05	14571|270084|99712|19012|225010|110524|67512|226856|18778|214253|227333|18777|320951|18805|18806|18807|210992|271844|26565|12660|50767|231510|52123|320127|232889|27388|12651|71760|26394|13026|18618|75320|380921|19210|665270|12647|77582|237625|68262|192654|13139|53357|66826|215456|74182|74451|67916|236899|218121|14732|102238433|333433|104418|110911|11423|26971|26970|110197|52858|68671|56077|211429…	http://www.genome.jp/kegg-bin/show_pathway?mmu00564/mmu:231510%09red/mmu:53357%09red/mmu:74182%09red/mmu:14712%09red/mmu:380921%09red/mmu:237625%09red/mmu:320951%09red/mmu:50767%09red/mmu:14245%09red/mmu:64899%09red/mmu:64898%09red/mmu:270084%09red/mmu:14571%09red/mmu:104759%09red/mmu:68262%09red/mmu:226856%09red/mmu:50784%09red/mmu:11423%09red/mmu:67916%09red/mmu:18777%09red/mmu:66586%09red/mmu:…
Cell adhesion molecules (CAMs)	KEGG PATHWAY	mmu04514	150	176	4.13e-06	1.59e-05	54725|12483|12487|110557|67374|19268|60363|15043|12524|15040|14985|20737|19264|245537|13003|100504404|20969|71908|319504|19274|242122|18566|18007|272381|12738|14990|14991|14997|15006|14998|14999|269116|18417|630294|20612|16415|16414|16410|16412|94332|53624|12504|192167|15024|239931|68481|66797|74987|12525|216856|18189|15042|15529|18613|20340|20343|20344|20345|16401|60533|83964|16408|16409|15039|1…	http://www.genome.jp/kegg-bin/show_pathway?mmu04514/mmu:14964%09red/mmu:18189%09red/mmu:19294%09red/mmu:224753%09red/mmu:12511%09red/mmu:14972%09red/mmu:12737%09red/mmu:12519%09red/mmu:192167%09red/mmu:67374%09red/mmu:20339%09red/mmu:54420%09red/mmu:320910%09red/mmu:58205%09red/mmu:69524%09red/mmu:224761%09red/mmu:83964%09red/mmu:100529082%09red/mmu:53321%09red/mmu:14963%09red/mmu:14960%09red/mmu…
AGE-RAGE signaling pathway in diabetic complications	KEGG PATHWAY	mmu04933	100	103	4.74e-06	1.8e-05	16476|20848|94216|18762|20846|12830|14268|17390|18018|13367|18795|18796|18797|18798|18799|234779|29857|12828|12829|14066|12825|12826|12827|11652|18802|18803|16176|16175|18176|26413|26416|26417|26414|26415|26419|20293|14205|13614|11607|20850|20851|11608|19353|16653|22340|12842|12843|26420|21926|11596|56458|15894|21824|19697|17128|72469|17126|17127|23797|12443|20339|12567|18750|18751|18753|18754|74…	http://www.genome.jp/kegg-bin/show_pathway?mmu04933/mmu:12028%09red/mmu:19697%09red/mmu:21926%09red/mmu:20339%09red/mmu:13614%09red/mmu:12825%09red/mmu:12827%09red/mmu:12826%09red/mmu:12829%09red/mmu:12828%09red/mmu:20293%09red/mmu:94216%09red/mmu:19353%09red/mmu:12830%09red/mmu:16176%09red/mmu:16175%09red/mmu:13058%09red/mmu:15461%09red/mmu:23797%09red/mmu:72469%09red/mmu:18762%09red/mmu:56458%0…
Melanogenesis	KEGG PATHWAY	mmu04916	97	99	5.07e-06	1.91e-05	14679|14678|14677|93897|56637|22173|22178|18795|18796|18797|16842|18798|12315|110157|494124|108058|93735|208677|210044|12387|328572|18176|13544|26413|22409|26417|13542|13543|13618|13614|18976|26395|12314|26396|12313|57265|16653|12912|12913|12914|22418|22419|26427|22417|22414|22415|22412|22413|22410|22411|14682|14683|14681|11515|11514|11513|11512|18747|12322|224129|12325|18749|70405|22416|22423|22…	http://www.genome.jp/kegg-bin/show_pathway?mmu04916/mmu:432530%09red/mmu:22409%09red/mmu:13190%09red/mmu:14368%09red/mmu:14369%09red/mmu:18747%09red/mmu:93897%09red/mmu:13614%09red/mmu:14362%09red/mmu:18749%09red/mmu:22422%09red/mmu:14365%09red/mmu:14366%09red/mmu:14367%09red/mmu:108058%09red/mmu:26395%09red/mmu:22413%09red/mmu:22412%09red/mmu:22411%09red/mmu:22410%09red/mmu:22417%09red/mmu:22416…
Endocrine resistance	KEGG PATHWAY	mmu01522	94	95	5.41e-06	2.01e-05	16476|20779|18129|19014|15200|27413|19645|11836|29857|17390|17395|271849|210044|20683|13557|13555|17246|18176|26413|26416|26417|109880|26415|26419|12015|26395|26396|110157|13388|13389|13866|16653|76854|26420|20185|17979|14683|11515|11514|11513|11512|18747|14281|224129|12124|18749|72508|23797|12443|58988|12567|16000|16001|26414|54485|14784|20418|15461|20416|18128|12028|13649|12578|12576|12575|1870…	http://www.genome.jp/kegg-bin/show_pathway?mmu01522/mmu:432530%09red/mmu:27413%09red/mmu:12028%09red/mmu:13983%09red/mmu:13982%09red/mmu:13866%09red/mmu:18131%09red/mmu:18747%09red/mmu:59035%09red/mmu:104111%09red/mmu:18749%09red/mmu:14083%09red/mmu:17979%09red/mmu:242705%09red/mmu:26395%09red/mmu:26396%09red/mmu:12580%09red/mmu:16449%09red/mmu:15461%09red/mmu:20185%09red/mmu:23797%09red/mmu:2100…
Chagas disease (American trypanosomiasis)	KEGG PATHWAY	mmu05142	100	104	6.2e-06	2.27e-05	16476|14679|14678|14677|14676|14675|14672|81897|12370|18795|18796|18797|12675|18798|16160|14103|14102|29857|12062|24088|16176|12262|12260|16179|12266|15980|26413|26416|71978|26414|26415|26419|20293|12503|12502|12501|12500|12259|12317|26398|17874|26420|14682|14683|14680|14681|21926|14281|16150|16151|16153|22034|52432|19697|12633|73699|17126|17127|23797|19052|19053|21937|11421|16183|18126|106759|26…	http://www.genome.jp/kegg-bin/show_pathway?mmu05142/mmu:432530%09red/mmu:19697%09red/mmu:21926%09red/mmu:15978%09red/mmu:81897%09red/mmu:14082%09red/mmu:19053%09red/mmu:19052%09red/mmu:17874%09red/mmu:20293%09red/mmu:11421%09red/mmu:52432%09red/mmu:12503%09red/mmu:12500%09red/mmu:12501%09red/mmu:26398%09red/mmu:16176%09red/mmu:16179%09red/mmu:16476%09red/mmu:73699%09red/mmu:23797%09red/mmu:18709%…
Measles	KEGG PATHWAY	mmu05162	124	139	6.33e-06	2.29e-05	20848|54721|12487|18761|20847|20846|56637|81897|15511|68135|15512|12675|16160|16163|13001|13000|68098|14103|14102|54123|26409|230073|17858|23961|23960|24088|16176|319642|16175|228607|15980|17221|71586|14694|12501|12500|69165|20850|20851|242519|23797|15482|17874|12995|12443|68652|170743|16179|22062|13665|13666|16159|16391|21929|22034|22035|14130|21336|19697|20400|12448|246727|170780|12447|12444|12…	http://www.genome.jp/kegg-bin/show_pathway?mmu05162/mmu:13448%09red/mmu:15976%09red/mmu:15974%09red/mmu:21929%09red/mmu:19697%09red/mmu:15978%09red/mmu:15979%09red/mmu:19106%09red/mmu:14360%09red/mmu:17874%09red/mmu:22062%09red/mmu:16163%09red/mmu:12502%09red/mmu:12500%09red/mmu:12501%09red/mmu:13001%09red/mmu:170780%09red/mmu:15975%09red/mmu:16176%09red/mmu:16175%09red/mmu:228607%09red/mmu:16179…
Non-alcoholic fatty liver disease (NAFLD)	KEGG PATHWAY	mmu04932	136	157	6.48e-06	2.31e-05	16476|67273|56637|16333|110323|16846|16847|19013|11911|227197|66377|66152|14103|14102|208104|18770|26403|12702|26408|407785|17995|17993|17992|17991|68194|22272|22273|16176|16175|672195|66414|66142|12859|12858|225887|66495|69875|26414|333182|26419|12857|606496|66091|78330|19079|407790|241113|58805|19353|12370|105787|108079|67003|70316|66576|78943|26420|20181|13665|84682|13666|21926|16396|78174|161…	http://www.genome.jp/kegg-bin/show_pathway?mmu04932/mmu:18033%09red/mmu:226646%09red/mmu:12028%09red/mmu:19697%09red/mmu:407785%09red/mmu:66414%09red/mmu:21926%09red/mmu:20787%09red/mmu:110323%09red/mmu:66576%09red/mmu:78943%09red/mmu:13063%09red/mmu:595136%09red/mmu:16367%09red/mmu:22259%09red/mmu:18770%09red/mmu:68349%09red/mmu:19353%09red/mmu:16847%09red/mmu:16846%09red/mmu:16176%09red/mmu:161…
Chemical carcinogenesis	KEGG PATHWAY	mmu05204	92	93	6.8e-06	2.39e-05	94215|14859|14858|243085|67689|12408|13089|13088|103140|435489|72094|66447|13849|229905|11670|13098|13099|13096|13097|13094|13095|94284|76263|71773|231396|211666|70266|14866|72082|337924|226105|13090|68312|11863|243881|15483|11441|69888|20859|613123|100727|56615|621603|404195|20887|22238|22236|112417|17962|17960|17961|73458|56847|54486|26876|552899|11532|13113|13112|19225|13114|14871|14870|14873|…	http://www.genome.jp/kegg-bin/show_pathway?mmu05204/mmu:13112%09red/mmu:13113%09red/mmu:13114%09red/mmu:112417%09red/mmu:14870%09red/mmu:14871%09red/mmu:14872%09red/mmu:14873%09red/mmu:94284%09red/mmu:11532%09red/mmu:229905%09red/mmu:107141%09red/mmu:19225%09red/mmu:243085%09red/mmu:73458%09red/mmu:67689%09red/mmu:337924%09red/mmu:94215%09red/mmu:394430%09red/mmu:394432%09red/mmu:394433%09red/mmu…
Longevity regulating pathway	KEGG PATHWAY	mmu04211	94	96	7.15e-06	2.48e-05	29869|64930|16370|19016|19017|11911|77683|51897|208677|13685|13684|230784|19697|210044|67605|11909|18176|12421|19079|241113|22084|55984|22241|105787|108079|12912|12913|16653|12915|26427|93759|11515|11514|11513|11512|18747|224129|12326|110147|11450|18749|16333|16334|16337|75747|18707|72508|23797|58988|26987|16000|16001|68465|72674|231991|15461|12028|140742|108097|218268|72993|108099|78284|384783|1…	http://www.genome.jp/kegg-bin/show_pathway?mmu04211/mmu:13684%09red/mmu:13685%09red/mmu:432530%09red/mmu:16591%09red/mmu:72993%09red/mmu:12028%09red/mmu:19697%09red/mmu:16370%09red/mmu:12359%09red/mmu:18747%09red/mmu:104111%09red/mmu:18749%09red/mmu:16367%09red/mmu:231991%09red/mmu:67605%09red/mmu:16369%09red/mmu:12421%09red/mmu:241113%09red/mmu:15461%09red/mmu:218268%09red/mmu:23797%09red/mmu:21…
Prostate cancer	KEGG PATHWAY	mmu05215	89	89	7.22e-06	2.48e-05	18095|15519|15516|12371|16842|12675|11911|19645|11836|11835|56637|208677|14183|14182|13557|13555|328572|17246|12387|18176|26413|26417|109880|12015|26395|54635|26396|110157|22027|19211|12447|13866|12912|12913|94224|26427|56458|16150|16151|16333|16334|18607|19697|16653|18590|18591|18596|18595|23797|12443|12448|12566|16000|16001|71785|231991|14784|13645|12914|15461|13649|23920|12576|12575|78284|1870…	http://www.genome.jp/kegg-bin/show_pathway?mmu05215/mmu:14870%09red/mmu:18035%09red/mmu:19697%09red/mmu:13866%09red/mmu:109880%09red/mmu:242705%09red/mmu:231991%09red/mmu:26395%09red/mmu:26396%09red/mmu:54635%09red/mmu:328572%09red/mmu:16842%09red/mmu:19211%09red/mmu:15461%09red/mmu:23797%09red/mmu:56458%09red/mmu:18176%09red/mmu:14784%09red/mmu:78284%09red/mmu:71785%09red/mmu:23920%09red/mmu:135…
Glucagon signaling pathway	KEGG PATHWAY	mmu04922	98	102	7.8e-06	2.64e-05	74551|18641|18648|245509|232493|18795|18796|18797|19013|18798|12314|11911|494124|104570|18679|106557|208677|210044|328572|19309|11909|100705|56420|19079|68401|241113|12315|12313|110094|105787|108079|19059|12912|12913|12914|14121|19017|68734|26427|110078|14682|14526|68263|12322|18576|56458|14936|100134861|18749|70405|20525|20526|18598|16439|16438|18597|19058|23797|74343|19055|19056|19057|231991|68…	http://www.genome.jp/kegg-bin/show_pathway?mmu04922/mmu:241113%09red/mmu:18746%09red/mmu:18747%09red/mmu:18749%09red/mmu:19055%09red/mmu:19057%09red/mmu:19056%09red/mmu:68734%09red/mmu:68961%09red/mmu:19058%09red/mmu:100705%09red/mmu:108058%09red/mmu:18679%09red/mmu:231991%09red/mmu:328572%09red/mmu:15469%09red/mmu:16440%09red/mmu:18576%09red/mmu:107476%09red/mmu:12894%09red/mmu:12895%09red/mmu:1…
Hepatitis C	KEGG PATHWAY	mmu05160	122	137	7.9e-06	2.65e-05	20848|54721|20847|20846|56637|20778|60363|12520|19013|12675|242653|15467|71908|11836|29857|54123|12702|18708|230073|19697|23961|23960|18417|228607|18176|26413|26416|71978|109880|26415|26419|54131|12015|239931|110157|667373|74987|242519|19192|16653|15957|26420|20181|13665|13666|21926|16391|13649|16150|16151|22030|22031|142980|22034|52432|18607|12738|12739|73699|246727|12737|23797|19052|19053|54420…	http://www.genome.jp/kegg-bin/show_pathway?mmu05160/mmu:16391%09red/mmu:15976%09red/mmu:15974%09red/mmu:15975%09red/mmu:19697%09red/mmu:71609%09red/mmu:21926%09red/mmu:54131%09red/mmu:19106%09red/mmu:54420%09red/mmu:19053%09red/mmu:19052%09red/mmu:52432%09red/mmu:16362%09red/mmu:12740%09red/mmu:12741%09red/mmu:22259%09red/mmu:16451%09red/mmu:18260%09red/mmu:228607%09red/mmu:19766%09red/mmu:20181%…
GnRH signaling pathway	KEGG PATHWAY	mmu04912	88	88	8.1e-06	2.68e-05	16476|14672|20779|18795|18796|18797|15200|18798|26397|11911|12315|12313|494124|108058|29857|26401|26400|26405|26407|26406|17390|18805|18806|271844|210044|18176|26413|26416|26417|26414|26415|26419|17387|232889|16438|16866|26395|12314|26396|110157|26399|26398|54652|16653|12640|26420|14682|14683|11515|11514|11513|11512|18747|12322|224129|12325|18749|70405|16439|14308|102238433|18750|18751|18753|1478…	http://www.genome.jp/kegg-bin/show_pathway?mmu04912/mmu:12313%09red/mmu:14672%09red/mmu:18749%09red/mmu:14683%09red/mmu:14682%09red/mmu:210044%09red/mmu:12640%09red/mmu:14715%09red/mmu:14714%09red/mmu:70405%09red/mmu:11512%09red/mmu:11513%09red/mmu:11514%09red/mmu:11515%09red/mmu:494124%09red/mmu:26417%09red/mmu:26416%09red/mmu:26415%09red/mmu:26414%09red/mmu:12292%09red/mmu:18747%09red/mmu:14308…
Estrogen signaling pathway	KEGG PATHWAY	mmu04915	95	98	8.39e-06	2.74e-05	16476|14679|14678|14677|242425|15519|70405|20779|15511|15512|15516|18795|18796|18797|15200|208677|18798|11911|12315|110157|494124|17390|17395|271849|210044|20683|18390|11909|18176|26413|26417|26395|12314|26396|12313|22027|15482|12912|12913|16653|12915|76854|26427|14682|14683|14681|11515|11514|11513|11512|18747|14281|224129|18749|16521|16522|16524|14228|14229|16439|16438|23797|18753|231991|14784|1…	http://www.genome.jp/kegg-bin/show_pathway?mmu04915/mmu:432530%09red/mmu:13983%09red/mmu:13982%09red/mmu:18747%09red/mmu:104111%09red/mmu:18749%09red/mmu:16519%09red/mmu:54393%09red/mmu:231991%09red/mmu:26395%09red/mmu:26396%09red/mmu:16440%09red/mmu:15482%09red/mmu:242425%09red/mmu:14816%09red/mmu:210044%09red/mmu:70405%09red/mmu:11512%09red/mmu:11513%09red/mmu:11514%09red/mmu:11515%09red/mmu:20…
Morphine addiction	KEGG PATHWAY	mmu05032	91	93	1.01e-05	3.26e-05	14679|14678|14677|29863|14772|14773|13488|110886|242425|18577|210044|18390|18747|320129|216869|14695|14697|14696|14693|14699|18583|18584|14683|14681|11515|11514|11513|11512|207728|18575|110385|26385|224129|18573|18578|18749|16521|16522|16524|18750|18751|18752|110355|57249|14707|14706|64337|14704|14702|14701|14700|218461|100043318|14709|14708|11539|54393|109689|66066|14710|14688|100503710|18574|18…	http://www.genome.jp/kegg-bin/show_pathway?mmu05032/mmu:14401%09red/mmu:14394%09red/mmu:14403%09red/mmu:14396%09red/mmu:14405%09red/mmu:14404%09red/mmu:14407%09red/mmu:14400%09red/mmu:432530%09red/mmu:14408%09red/mmu:14399%09red/mmu:14397%09red/mmu:109689%09red/mmu:18584%09red/mmu:11539%09red/mmu:18583%09red/mmu:18747%09red/mmu:104111%09red/mmu:26385%09red/mmu:14406%09red/mmu:14409%09red/mmu:1471…
mRNA surveillance pathway	KEGG PATHWAY	mmu03015	93	96	1.05e-05	3.37e-05	53319|14853|14852|54196|54451|68134|545388|433702|216578|53817|56522|237082|105083|381404|26931|26932|170722|21770|192170|226517|235542|226849|67543|108062|434080|94230|93728|71978|60365|56422|103677|192160|19704|68092|432508|56215|74737|269061|20220|19047|19046|19045|78428|83410|230721|76626|229512|18459|18458|70248|52432|233789|100041953|73699|98985|21681|19052|19053|19054|67897|228410|19826|24…	http://www.genome.jp/kegg-bin/show_pathway?mmu03015/mmu:235542%09red/mmu:59032%09red/mmu:53817%09red/mmu:77305%09red/mmu:19054%09red/mmu:19053%09red/mmu:19052%09red/mmu:241989%09red/mmu:67543%09red/mmu:230721%09red/mmu:52432%09red/mmu:103677%09red/mmu:225849%09red/mmu:19046%09red/mmu:20220%09red/mmu:19045%09red/mmu:434233%09red/mmu:51786%09red/mmu:60365%09red/mmu:19826%09red/mmu:78428%09red/mmu:7…
Alcoholism	KEGG PATHWAY	mmu05034	165	204	1.1e-05	3.48e-05	547154|14679|14678|14677|14700|18767|11540|11541|17161|547160|68231|69389|69386|69382|100043318|13489|13488|13162|63959|110157|494124|11836|56233|18212|12064|77605|271849|319167|404634|11909|97114|18176|433759|109648|214084|20663|26417|109880|97908|14695|232440|15184|14696|15182|15183|14693|14699|26395|12314|12315|12313|55984|78284|12918|18610|12912|12913|16653|320332|12915|26427|70315|385328|269…	http://www.genome.jp/kegg-bin/show_pathway?mmu05034/mmu:14709%09red/mmu:17161%09red/mmu:14710%09red/mmu:15267%09red/mmu:319190%09red/mmu:68231%09red/mmu:13195%09red/mmu:109880%09red/mmu:18747%09red/mmu:18212%09red/mmu:433759%09red/mmu:78303%09red/mmu:14681%09red/mmu:15078%09red/mmu:14708%09red/mmu:224129%09red/mmu:14702%09red/mmu:14700%09red/mmu:14701%09red/mmu:14706%09red/mmu:14707%09red/mmu:147…
Circadian entrainment	KEGG PATHWAY	mmu04713	94	98	1.23e-05	3.85e-05	239556|18125|58226|14678|14677|54195|70405|18795|18796|18797|14679|18798|494124|108058|60596|210044|244701|19416|26413|26417|53623|14695|14697|14696|20191|20190|14693|20192|14699|12314|12315|12313|12912|239134|14682|14683|14681|11515|11514|11517|14688|11512|18747|12322|14281|224129|12325|18749|16521|16522|16524|16438|18750|18751|18752|70729|14707|14706|64337|14704|14702|14701|14700|100043318|1470…	http://www.genome.jp/kegg-bin/show_pathway?mmu04713/mmu:432530%09red/mmu:14710%09red/mmu:18747%09red/mmu:12291%09red/mmu:104111%09red/mmu:18749%09red/mmu:271639%09red/mmu:14708%09red/mmu:14709%09red/mmu:14702%09red/mmu:14700%09red/mmu:14701%09red/mmu:14706%09red/mmu:14707%09red/mmu:14704%09red/mmu:14802%09red/mmu:239134%09red/mmu:108058%09red/mmu:17773%09red/mmu:14799%09red/mmu:60596%09red/mmu:16…
GABAergic synapse	KEGG PATHWAY	mmu04727	87	89	1.6e-05	4.93e-05	227120|57138|14679|14678|14677|242425|20779|209837|110886|57436|268860|14660|93739|15114|210044|67760|14695|14697|14696|14693|14645|14699|268566|216456|54652|14681|11515|11514|11513|11512|18747|224129|18749|16522|18195|18750|18751|18752|57249|76257|14707|14706|64337|14704|14702|14701|14700|100043318|14709|14708|14404|54393|66066|14710|14688|100503710|105727|14412|14417|14415|12292|14394|14395|143…	http://www.genome.jp/kegg-bin/show_pathway?mmu04727/mmu:14401%09red/mmu:14394%09red/mmu:14403%09red/mmu:14396%09red/mmu:14405%09red/mmu:14404%09red/mmu:14407%09red/mmu:14400%09red/mmu:432530%09red/mmu:14408%09red/mmu:14399%09red/mmu:14397%09red/mmu:14402%09red/mmu:67760%09red/mmu:12292%09red/mmu:18747%09red/mmu:104111%09red/mmu:18749%09red/mmu:14409%09red/mmu:14710%09red/mmu:14412%09red/mmu:14708…
Hypertrophic cardiomyopathy (HCM)	KEGG PATHWAY	mmu05410	83	84	1.91e-05	5.84e-05	140723|19082|241226|24051|16400|140781|59069|16412|56808|105787|54376|54377|24053|16416|13346|16410|108099|20541|109700|20391|12294|16419|54378|16193|319480|12299|12298|20191|12288|16905|12293|12292|19079|12297|12296|12295|12289|11465|11464|16000|21924|11461|17906|192897|11938|11421|319734|21956|21954|81904|108079|21809|54652|81905|16773|320910|24052|17868|16402|16403|13726|16401|22003|104099|164…	http://www.genome.jp/kegg-bin/show_pathway?mmu05410/mmu:108099%09red/mmu:16773%09red/mmu:21956%09red/mmu:56808%09red/mmu:22138%09red/mmu:12289%09red/mmu:16404%09red/mmu:16403%09red/mmu:16402%09red/mmu:16399%09red/mmu:16400%09red/mmu:319734%09red/mmu:21808%09red/mmu:20541%09red/mmu:17897%09red/mmu:22004%09red/mmu:16193%09red/mmu:21926%09red/mmu:21803%09red/mmu:21924%09red/mmu:12296%09red/mmu:12297…
ErbB signaling pathway	KEGG PATHWAY	mmu04012	85	87	2.01e-05	6.07e-05	16476|14388|18707|18706|18176|12929|30955|18709|18708|100042150|56717|56637|18750|15461|74769|20779|26417|109880|18479|26419|72508|23797|320207|15200|26413|58988|216148|13712|26395|18751|18752|26396|241656|13685|13874|234779|20850|12015|13867|26398|26414|20851|18481|70584|12928|13869|11350|11836|13866|108058|14784|16653|17869|18183|208650|13645|80794|13649|214230|20663|20662|20416|83961|26420|110…	http://www.genome.jp/kegg-bin/show_pathway?mmu04012/mmu:224105%09red/mmu:13712%09red/mmu:13685%09red/mmu:12576%09red/mmu:12575%09red/mmu:23797%09red/mmu:12402%09red/mmu:18709%09red/mmu:20418%09red/mmu:208650%09red/mmu:18183%09red/mmu:14083%09red/mmu:18708%09red/mmu:241656%09red/mmu:18706%09red/mmu:18707%09red/mmu:56637%09red/mmu:18481%09red/mmu:70584%09red/mmu:13866%09red/mmu:100042150%09red/mmu:…
Dilated cardiomyopathy	KEGG PATHWAY	mmu05414	87	90	2.1e-05	6.21e-05	56808|140781|13405|319480|11465|11464|11461|192897|16773|24051|24052|24053|13726|22003|22004|59310|210044|12300|16416|16410|16412|16419|17906|17868|20191|59069|621054|11938|319734|81905|81904|54652|16404|16402|16403|16400|16401|104099|14683|11515|11514|11513|11512|18747|21926|21924|224129|213119|16398|16399|13138|18749|22138|109700|326618|16000|241226|21956|21954|320910|16420|17897|54376|54377|13…	http://www.genome.jp/kegg-bin/show_pathway?mmu05414/mmu:16773%09red/mmu:21956%09red/mmu:56808%09red/mmu:14683%09red/mmu:12289%09red/mmu:210044%09red/mmu:224129%09red/mmu:16403%09red/mmu:16402%09red/mmu:16399%09red/mmu:16400%09red/mmu:319734%09red/mmu:21808%09red/mmu:20541%09red/mmu:11513%09red/mmu:17897%09red/mmu:11515%09red/mmu:11512%09red/mmu:22004%09red/mmu:21803%09red/mmu:21926%09red/mmu:3209…
Fc gamma R-mediated phagocytosis	KEGG PATHWAY	mmu04666	87	90	2.1e-05	6.21e-05	19264|12929|12928|15162|56632|22376|19012|245880|234779|20963|18805|18806|230837|18803|211914|68089|74192|242687|18479|26413|26417|20698|26395|17096|110157|67771|19353|14129|19354|13430|16797|73178|83767|16331|53357|16886|18720|16885|14130|12631|12632|72508|23797|17969|58988|18750|18751|18752|18753|18754|14389|56443|17357|17118|218038|17909|30948|13196|76709|11867|329502|18707|18706|320207|18709|…	http://www.genome.jp/kegg-bin/show_pathway?mmu04666/mmu:53357%09red/mmu:67771%09red/mmu:13196%09red/mmu:67916%09red/mmu:13430%09red/mmu:50784%09red/mmu:14389%09red/mmu:20698%09red/mmu:245880%09red/mmu:26395%09red/mmu:19354%09red/mmu:19353%09red/mmu:76709%09red/mmu:56443%09red/mmu:12632%09red/mmu:18479%09red/mmu:17909%09red/mmu:11845%09red/mmu:14130%09red/mmu:23797%09red/mmu:22376%09red/mmu:16331%…
ECM-receptor interaction	KEGG PATHWAY	mmu04512	82	83	2.15e-05	6.28e-05	15891|21828|21960|75209|94216|22371|16401|21826|21827|23928|12833|12842|16416|14268|16410|12835|114249|109700|12839|20750|16419|12826|19699|319480|104099|16780|12505|16782|243816|15530|15366|64051|22370|12841|11603|64176|68553|16423|241226|12491|16779|329278|192897|21825|12834|16772|16773|16774|16775|16776|16777|320910|16404|665033|16402|12829|16400|20969|12824|12843|12840|12827|16420|54368|12643…	http://www.genome.jp/kegg-bin/show_pathway?mmu04512/mmu:12643%09red/mmu:16773%09red/mmu:16772%09red/mmu:16775%09red/mmu:16774%09red/mmu:16777%09red/mmu:11603%09red/mmu:16779%09red/mmu:15366%09red/mmu:16423%09red/mmu:22371%09red/mmu:16403%09red/mmu:16402%09red/mmu:16399%09red/mmu:16400%09red/mmu:104099%09red/mmu:21960%09red/mmu:21828%09red/mmu:21827%09red/mmu:21923%09red/mmu:19699%09red/mmu:20971%…
Insulin secretion	KEGG PATHWAY	mmu04911	84	86	2.25e-05	6.52e-05	19339|18609|16334|20525|20614|67821|16333|18798|233081|14672|208677|236781|12425|12912|12323|18795|18747|18796|18797|20191|20526|68667|12292|54652|12671|208647|84036|103988|18750|18751|58802|56508|27222|100502876|224129|11933|11932|11931|16532|16533|16531|232975|16534|231991|18752|20907|108058|12913|16514|26875|12915|72413|11514|11936|26427|14607|16440|98660|12288|12289|14526|14682|14683|11911|11…	http://www.genome.jp/kegg-bin/show_pathway?mmu04911/mmu:20907%09red/mmu:18798%09red/mmu:14526%09red/mmu:208647%09red/mmu:16514%09red/mmu:14683%09red/mmu:14682%09red/mmu:210044%09red/mmu:224129%09red/mmu:232975%09red/mmu:11512%09red/mmu:84036%09red/mmu:11514%09red/mmu:11515%09red/mmu:11516%09red/mmu:11517%09red/mmu:16333%09red/mmu:12912%09red/mmu:12671%09red/mmu:67821%09red/mmu:18795%09red/mmu:140…
Platinum drug resistance	KEGG PATHWAY	mmu01524	78	78	2.56e-05	7.26e-05	672195|14871|18706|14873|14872|13870|20529|18707|18708|18710|14103|19714|14858|26413|74769|14865|26417|11651|12370|80905|18607|11920|14870|13067|12371|13063|12018|58801|12015|30955|170770|103140|320207|66447|22059|11783|14859|68214|11979|14866|14867|14864|14102|14862|14863|14860|23797|21974|13866|11977|17350|17688|14869|12043|14082|11798|12189|12780|17685|12048|21973|12028|68312|12367|11799|12578…	http://www.genome.jp/kegg-bin/show_pathway?mmu01524/mmu:12048%09red/mmu:11977%09red/mmu:12575%09red/mmu:12043%09red/mmu:14871%09red/mmu:14872%09red/mmu:68214%09red/mmu:12122%09red/mmu:12371%09red/mmu:12028%09red/mmu:12015%09red/mmu:80905%09red/mmu:14862%09red/mmu:18708%09red/mmu:170770%09red/mmu:18706%09red/mmu:18707%09red/mmu:14858%09red/mmu:14859%09red/mmu:68312%09red/mmu:11920%09red/mmu:211666…
Bacterial invasion of epithelial cells	KEGG PATHWAY	mmu05100	78	78	2.56e-05	7.26e-05	242687|18707|18706|12927|78514|12929|12928|18709|18708|22376|140579|74769|14388|14268|13429|12540|622434|56378|320207|74325|71089|12757|71890|16412|12390|12391|11465|103967|53860|11461|67300|216148|67771|13043|56526|67653|56443|19353|16202|15163|12488|12402|56212|54204|11848|18710|73178|52398|12550|208650|234683|14083|16402|20418|13430|17295|20416|18000|24050|12389|271849|20362|12387|12386|330662…	http://www.genome.jp/kegg-bin/show_pathway?mmu05100/mmu:320207%09red/mmu:83767%09red/mmu:22330%09red/mmu:68089%09red/mmu:71089%09red/mmu:73178%09red/mmu:18709%09red/mmu:22376%09red/mmu:12550%09red/mmu:11848%09red/mmu:13429%09red/mmu:208650%09red/mmu:67771%09red/mmu:67653%09red/mmu:18708%09red/mmu:12402%09red/mmu:18706%09red/mmu:18707%09red/mmu:12391%09red/mmu:12390%09red/mmu:12757%09red/mmu:16202…
Peroxisome	KEGG PATHWAY	mmu04146	81	83	3.18e-05	8.94e-05	74043|110959|56185|20524|212503|12908|18477|113868|170789|13850|93732|14712|208982|26378|20656|18634|56690|17527|11666|13142|20655|51798|26458|16922|234384|74205|19298|19299|111175|12012|50790|56273|12359|18633|18632|18631|433256|15926|330450|70503|69129|68603|19305|17117|228061|22436|15488|71382|67420|19193|67993|26874|58869|224824|15356|80911|74114|18126|103737|74147|20280|269951|15112|54683|59…	http://www.genome.jp/kegg-bin/show_pathway?mmu04146/mmu:20280%09red/mmu:70503%09red/mmu:19299%09red/mmu:19298%09red/mmu:50790%09red/mmu:668173%09red/mmu:11430%09red/mmu:74205%09red/mmu:11611%09red/mmu:216739%09red/mmu:17527%09red/mmu:72129%09red/mmu:11666%09red/mmu:69129%09red/mmu:235674%09red/mmu:26458%09red/mmu:12359%09red/mmu:19301%09red/mmu:224824%09red/mmu:20524%09red/mmu:12908%09red/mmu:937…
Biosynthesis of amino acids	KEGG PATHWAY	mmu01230	78	79	3.4e-05	9.46e-05	231691|21351|108645|217214|18642|18478|328099|18641|71832|230163|56454|18648|100042427|20425|14718|257635|107272|75456|14719|13807|15929|13806|21991|14433|71776|56421|66194|100039229|12035|243996|11429|11428|209027|23923|11720|19895|227231|15926|100678|433182|18655|109652|67834|170718|14645|18563|18770|66646|107869|238505|11898|13808|232087|18416|11674|12974|18663|110695|269951|108037|74419|23653…	http://www.genome.jp/kegg-bin/show_pathway?mmu01230/mmu:14719%09red/mmu:11846%09red/mmu:14645%09red/mmu:11720%09red/mmu:14718%09red/mmu:83553%09red/mmu:11676%09red/mmu:100678%09red/mmu:66194%09red/mmu:20425%09red/mmu:18641%09red/mmu:328099%09red/mmu:108682%09red/mmu:110639%09red/mmu:18648%09red/mmu:12411%09red/mmu:18663%09red/mmu:108645%09red/mmu:238505%09red/mmu:227231%09red/mmu:71832%09red/mmu:…
Retinol metabolism	KEGG PATHWAY	mmu00830	85	89	3.45e-05	9.5e-05	67442|72082|94215|28200|22238|53973|22236|112417|243085|337924|666168|72094|226105|226143|11522|71872|26358|11668|394433|394430|13089|98711|72303|394436|107141|13117|13087|13086|613123|235033|103142|243881|245532|79235|27400|56388|277753|552899|71773|17252|11761|241452|13090|433247|71724|213043|242285|13085|11529|13082|20148|13114|19378|26876|100041375|13350|63857|19683|19682|13099|94284|13088|10…	http://www.genome.jp/kegg-bin/show_pathway?mmu00830/mmu:13112%09red/mmu:13113%09red/mmu:72082%09red/mmu:98711%09red/mmu:13117%09red/mmu:13114%09red/mmu:72303%09red/mmu:79235%09red/mmu:19683%09red/mmu:17252%09red/mmu:11532%09red/mmu:20148%09red/mmu:94284%09red/mmu:19378%09red/mmu:13099%09red/mmu:13096%09red/mmu:13097%09red/mmu:666168%09red/mmu:13095%09red/mmu:13094%09red/mmu:213043%09red/mmu:11668…
TGF-beta signaling pathway	KEGG PATHWAY	mmu04350	82	85	3.73e-05	0.000101575	228839|17965|15902|15903|15901|320202|21781|269275|26413|17128|73699|68010|26417|17130|17126|72508|11481|11480|268977|66313|19052|21926|55994|58988|13559|26965|12167|21402|17127|12159|21815|21803|21813|21812|11477|12156|18119|67653|15978|17125|16326|16325|16324|16323|18741|110542|230597|11848|12914|104394|218441|18121|14563|51792|19053|21825|17131|17129|328572|17869|15904|12579|242316|56438|12667…	http://www.genome.jp/kegg-bin/show_pathway?mmu04350/mmu:230597%09red/mmu:73699%09red/mmu:11479%09red/mmu:12667%09red/mmu:12579%09red/mmu:20683%09red/mmu:11848%09red/mmu:12160%09red/mmu:21808%09red/mmu:12162%09red/mmu:12163%09red/mmu:12164%09red/mmu:12161%09red/mmu:12166%09red/mmu:12167%09red/mmu:12168%09red/mmu:21803%09red/mmu:21926%09red/mmu:21825%09red/mmu:15978%09red/mmu:26417%09red/mmu:51792%…
Salmonella infection	KEGG PATHWAY	mmu05132	77	78	3.82e-05	0.000103066	16476|242687|18643|68794|280408|66824|22376|232943|19697|19878|18645|26416|26417|12981|26415|13427|268973|26419|19877|16193|56378|109333|12540|20310|21898|16803|18033|263803|235661|19349|330122|11465|13424|11461|56212|67771|74764|56443|15979|15978|19353|110350|21872|19094|29857|74192|69582|320795|14825|17874|16593|53791|18126|382562|73178|286940|26420|226421|12362|12475|26413|192176|26414|20302|2…	http://www.genome.jp/kegg-bin/show_pathway?mmu05132/mmu:14281%09red/mmu:16476%09red/mmu:13424%09red/mmu:234663%09red/mmu:68089%09red/mmu:22376%09red/mmu:18033%09red/mmu:19353%09red/mmu:18643%09red/mmu:73178%09red/mmu:19697%09red/mmu:16593%09red/mmu:18645%09red/mmu:192176%09red/mmu:109333%09red/mmu:69582%09red/mmu:16193%09red/mmu:15978%09red/mmu:15979%09red/mmu:26417%09red/mmu:26416%09red/mmu:2641…
Prolactin signaling pathway	KEGG PATHWAY	mmu04917	74	74	4.06e-05	0.000107515	20848|18707|18706|18176|320207|21823|18709|18708|18710|54607|56637|19697|74769|16333|20779|26417|26414|26415|16334|26419|12443|23797|12444|16452|18033|14430|19116|13711|30955|16866|16867|56468|26395|22373|26396|21934|20851|20850|12991|13983|15461|20526|19094|29857|14784|16653|56484|20846|16362|21943|12702|12640|20663|20662|20416|26420|110157|13074|271849|26413|20418|103988|19109|216233|12703|1398…	http://www.genome.jp/kegg-bin/show_pathway?mmu04917/mmu:320207%09red/mmu:12991%09red/mmu:23797%09red/mmu:22373%09red/mmu:192157%09red/mmu:18033%09red/mmu:21943%09red/mmu:67296%09red/mmu:13983%09red/mmu:13982%09red/mmu:19697%09red/mmu:18708%09red/mmu:18709%09red/mmu:18706%09red/mmu:18707%09red/mmu:16333%09red/mmu:56637%09red/mmu:21823%09red/mmu:16334%09red/mmu:20662%09red/mmu:54607%09red/mmu:26416…
Pertussis	KEGG PATHWAY	mmu05133	74	74	4.06e-05	0.000107515	16476|317677|22034|18033|15900|14678|14677|66824|12631|19697|70405|26416|26417|26414|26415|11848|26419|54131|16193|20311|12315|21898|225471|22789|16412|107607|12259|12258|16160|12314|14281|12313|216799|14679|50909|50908|16409|67653|80796|20387|494124|83430|19094|21926|29857|17874|16362|15139|16402|18126|266632|12632|106759|26420|12367|16415|16153|12362|12475|26413|117149|16414|12369|16159|12268|1…	http://www.genome.jp/kegg-bin/show_pathway?mmu05133/mmu:12313%09red/mmu:16409%09red/mmu:17087%09red/mmu:16402%09red/mmu:70405%09red/mmu:15900%09red/mmu:11848%09red/mmu:50908%09red/mmu:50909%09red/mmu:494124%09red/mmu:12258%09red/mmu:12259%09red/mmu:21926%09red/mmu:16193%09red/mmu:66824%09red/mmu:16415%09red/mmu:26417%09red/mmu:12631%09red/mmu:26415%09red/mmu:12369%09red/mmu:26413%09red/mmu:19094%…
Arachidonic acid metabolism	KEGG PATHWAY	mmu00590	85	90	4.49e-05	0.000117342	72303|53357|26565|72082|26970|13096|69590|13110|13850|109857|666168|13117|226105|226143|14598|17001|232889|12408|14775|13089|11688|64385|107141|11684|11687|11686|13118|14778|243881|19223|56351|13109|66469|170716|69888|13106|435489|66350|21391|26971|14776|18778|96979|75512|23887|54486|277753|78390|211429|67305|64292|19215|329502|665270|12409|13119|230459|11689|14780|18781|13088|13095|100066|13098|…	http://www.genome.jp/kegg-bin/show_pathway?mmu00590/mmu:226143%09red/mmu:72303%09red/mmu:13110%09red/mmu:53357%09red/mmu:666168%09red/mmu:13117%09red/mmu:75512%09red/mmu:404195%09red/mmu:226105%09red/mmu:54486%09red/mmu:100066%09red/mmu:237625%09red/mmu:13097%09red/mmu:96979%09red/mmu:72082%09red/mmu:11688%09red/mmu:11689%09red/mmu:13099%09red/mmu:13096%09red/mmu:11684%09red/mmu:11685%09red/mmu:1…
Adipocytokine signaling pathway	KEGG PATHWAY	mmu04920	73	73	4.56e-05	0.000117342	22030|19082|19247|20848|20869|20525|74551|12895|12894|109648|56717|18035|19697|18037|78625|68401|26414|26419|16370|16846|23797|16452|216739|18761|19013|12675|74205|18033|19079|241113|18976|21938|50790|20528|14081|55984|433256|68465|11604|72674|18036|12491|94180|105787|108079|16847|21937|11652|14378|12702|328845|16151|16369|14377|26420|108097|11651|20182|20183|20181|11450|19017|100705|108099|21926…	http://www.genome.jp/kegg-bin/show_pathway?mmu04920/mmu:11604%09red/mmu:108099%09red/mmu:72674%09red/mmu:18033%09red/mmu:12894%09red/mmu:12895%09red/mmu:328845%09red/mmu:23797%09red/mmu:50790%09red/mmu:71609%09red/mmu:74205%09red/mmu:105787%09red/mmu:78070%09red/mmu:216739%09red/mmu:241113%09red/mmu:21938%09red/mmu:18976%09red/mmu:19697%09red/mmu:16370%09red/mmu:11450%09red/mmu:12675%09red/mmu:21…
Chronic myeloid leukemia	KEGG PATHWAY	mmu05220	73	73	4.56e-05	0.000117342	242705|19247|21809|18707|18706|18176|12929|433759|18709|18708|14013|14389|18035|19697|74769|20850|26417|109880|20416|17127|22059|23797|17869|15182|12443|12675|30955|12394|12567|26395|320207|26396|21813|21812|12928|19645|12571|12015|18033|80794|20851|15461|12402|11836|18710|110279|14784|16653|16150|20418|26413|16151|20663|20662|12048|271849|110157|12578|11652|208650|11350|13557|17128|13555|12575|1…	http://www.genome.jp/kegg-bin/show_pathway?mmu05220/mmu:13017%09red/mmu:13016%09red/mmu:12571%09red/mmu:12048%09red/mmu:14013%09red/mmu:12575%09red/mmu:20850%09red/mmu:23797%09red/mmu:14389%09red/mmu:12578%09red/mmu:15182%09red/mmu:18035%09red/mmu:21809%09red/mmu:21808%09red/mmu:208650%09red/mmu:19697%09red/mmu:18708%09red/mmu:18707%09red/mmu:18706%09red/mmu:12675%09red/mmu:21803%09red/mmu:18033%…
Gap junction	KEGG PATHWAY	mmu04540	82	86	4.87e-05	0.000123087	13489|18176|14678|14677|54195|104318|22153|15461|22151|20779|26417|22154|22152|14617|16438|18596|18590|18595|18750|18796|18591|14679|13488|15559|16439|18798|18795|23938|23939|26395|18751|54635|26396|238463|13649|108071|22146|71785|110157|67951|15558|21872|239134|14784|16653|19091|19092|14672|13645|18797|26405|11554|14609|20663|22145|16440|22147|15560|22142|22143|12534|60596|14682|14683|14745|2641…	http://www.genome.jp/kegg-bin/show_pathway?mmu04540/mmu:14672%09red/mmu:22154%09red/mmu:18749%09red/mmu:22152%09red/mmu:22153%09red/mmu:22151%09red/mmu:14683%09red/mmu:14682%09red/mmu:210044%09red/mmu:224129%09red/mmu:22147%09red/mmu:227613%09red/mmu:11512%09red/mmu:16439%09red/mmu:11514%09red/mmu:11515%09red/mmu:104318%09red/mmu:108071%09red/mmu:19091%09red/mmu:26417%09red/mmu:18795%09red/mmu:19…
Aldosterone synthesis and secretion	KEGG PATHWAY	mmu04925	82	86	4.87e-05	0.000123087	239556|13079|58226|16527|208647|18760|52163|17200|14672|20845|12314|208677|109305|70405|75292|18795|12912|494124|16439|16438|12323|207728|18796|18797|12315|12292|12291|18160|18798|15496|18750|18751|11607|18227|18754|12313|224129|11608|54652|101540|16890|110115|231871|15492|210044|108058|12913|20778|12915|215303|16835|11909|11514|26427|16440|15493|12288|12289|13070|223604|80796|269060|14682|14683|…	http://www.genome.jp/kegg-bin/show_pathway?mmu04925/mmu:12313%09red/mmu:14672%09red/mmu:11607%09red/mmu:11908%09red/mmu:14683%09red/mmu:14682%09red/mmu:210044%09red/mmu:224129%09red/mmu:11608%09red/mmu:215303%09red/mmu:70405%09red/mmu:18760%09red/mmu:11512%09red/mmu:11513%09red/mmu:11514%09red/mmu:18160%09red/mmu:18754%09red/mmu:227541%09red/mmu:208647%09red/mmu:12912%09red/mmu:52163%09red/mmu:12…
EGFR tyrosine kinase inhibitor resistance	KEGG PATHWAY	mmu01521	79	82	5.26e-05	0.000131842	20848|18707|18706|18176|14173|320207|18709|18708|100042150|56717|56637|18750|15461|74769|14388|20779|26417|18015|20662|16194|16542|18590|18591|18596|26362|16193|18595|23797|16452|20416|26413|58988|216148|26987|54635|72508|26395|18751|16000|16001|16451|234779|13684|71785|13867|18710|19211|11836|13866|14784|16653|56484|12043|13645|13649|20663|17295|12048|12028|13685|218268|110157|271849|14456|15234…	http://www.genome.jp/kegg-bin/show_pathway?mmu01521/mmu:218268%09red/mmu:12048%09red/mmu:11651%09red/mmu:234779%09red/mmu:15234%09red/mmu:12043%09red/mmu:12125%09red/mmu:14173%09red/mmu:26987%09red/mmu:26362%09red/mmu:12028%09red/mmu:12015%09red/mmu:13685%09red/mmu:18708%09red/mmu:18709%09red/mmu:18706%09red/mmu:18707%09red/mmu:16193%09red/mmu:56484%09red/mmu:16194%09red/mmu:14184%09red/mmu:10004…
PPAR signaling pathway	KEGG PATHWAY	mmu03320	81	85	5.46e-05	0.00013561	74551|17436|78625|329065|103968|12895|12894|12896|11807|16202|13119|666168|15360|60527|14079|66968|113868|225579|108078|14077|11814|19015|19016|74147|26458|19013|74205|11364|11363|20280|50790|26457|13124|83995|13122|57435|433256|66113|11520|18830|12491|94180|14626|30049|16204|277753|22227|11832|93732|18607|14081|16592|14933|328845|57875|16956|13167|216739|20181|20411|20249|12140|20182|20183|26569…	http://www.genome.jp/kegg-bin/show_pathway?mmu03320/mmu:20280%09red/mmu:66968%09red/mmu:666168%09red/mmu:13117%09red/mmu:12896%09red/mmu:328845%09red/mmu:50790%09red/mmu:13118%09red/mmu:11430%09red/mmu:74205%09red/mmu:11807%09red/mmu:78070%09red/mmu:216739%09red/mmu:18830%09red/mmu:11363%09red/mmu:26457%09red/mmu:277753%09red/mmu:235674%09red/mmu:11450%09red/mmu:26459%09red/mmu:26458%09red/mmu:12…
Pyrimidine metabolism	KEGG PATHWAY	mmu00240	94	104	5.6e-05	0.000137841	18973|107569|245841|22171|59001|74414|67967|18950|231329|69719|56520|72090|66401|21915|66979|22169|18969|18968|72962|66763|64705|55936|75533|633979|171567|69870|230718|66491|67065|69241|19076|19075|18971|100862375|67464|22247|22245|50773|68556|64424|72269|71701|215446|66420|232223|67710|110074|18103|18102|103149|69745|20021|20020|20022|79059|66588|80914|70408|16434|20133|23959|20135|67005|103850|…	http://www.genome.jp/kegg-bin/show_pathway?mmu00240/mmu:633979%09red/mmu:331487%09red/mmu:70428%09red/mmu:67967%09red/mmu:20135%09red/mmu:20133%09red/mmu:20020%09red/mmu:20021%09red/mmu:20022%09red/mmu:76952%09red/mmu:382985%09red/mmu:66588%09red/mmu:21915%09red/mmu:79059%09red/mmu:69241%09red/mmu:18102%09red/mmu:18103%09red/mmu:76025%09red/mmu:50493%09red/mmu:64705%09red/mmu:231329%09red/mmu:708…
Adherens junction	KEGG PATHWAY	mmu04520	73	74	6.06e-05	0.000146574	19263|20613|18099|242687|16337|19268|22376|26413|17128|19246|20779|26417|14158|12540|14360|99167|17126|17127|12386|16842|19294|380928|21415|170758|245880|93742|73178|11465|29875|16001|11461|21812|21813|58998|67653|22612|13000|19353|21872|227377|19354|19274|13866|71740|17356|12914|19271|13001|12550|12995|26409|17295|109711|20411|13649|21416|60595|12388|15170|21414|12385|12387|14182|58235|20583|114…	http://www.genome.jp/kegg-bin/show_pathway?mmu04520/mmu:12995%09red/mmu:22330%09red/mmu:14158%09red/mmu:328572%09red/mmu:19294%09red/mmu:22376%09red/mmu:12550%09red/mmu:11848%09red/mmu:83767%09red/mmu:73178%09red/mmu:71740%09red/mmu:67653%09red/mmu:93742%09red/mmu:11474%09red/mmu:11472%09red/mmu:16337%09red/mmu:13866%09red/mmu:227377%09red/mmu:19246%09red/mmu:108100%09red/mmu:26413%09red/mmu:1418…
Arrhythmogenic right ventricular cardiomyopathy (ARVC)	KEGG PATHWAY	mmu05412	73	74	6.06e-05	0.000146574	24051|16400|67451|16401|56808|54376|54377|16416|13405|16410|109620|20541|109700|20391|16419|13506|241226|319480|12299|12298|16842|16905|16404|12292|12297|12296|12295|12294|11465|11461|54378|192897|11938|319734|81905|81904|54652|16773|16480|320910|24052|24053|16402|16403|13726|14609|12558|20191|12288|109711|16420|12289|13511|60595|140723|21416|21415|21414|12385|12387|12386|104099|13138|16412|12293…	http://www.genome.jp/kegg-bin/show_pathway?mmu05412/mmu:16773%09red/mmu:13506%09red/mmu:12558%09red/mmu:56808%09red/mmu:320910%09red/mmu:12289%09red/mmu:16404%09red/mmu:16403%09red/mmu:16402%09red/mmu:16399%09red/mmu:16400%09red/mmu:319734%09red/mmu:67451%09red/mmu:20541%09red/mmu:16398%09red/mmu:11474%09red/mmu:16401%09red/mmu:11472%09red/mmu:12296%09red/mmu:12297%09red/mmu:12294%09red/mmu:12295…
Steroid hormone biosynthesis	KEGG PATHWAY	mmu00140	82	87	6.33e-05	0.000151694	13123|72082|13114|94215|14979|22238|22236|13096|112417|243085|71754|337924|226105|94284|394430|208665|223706|394433|380997|69888|20860|13089|13088|394436|107141|394435|226143|56388|243881|613123|15497|13122|27400|56448|552899|71773|13106|13101|76279|433247|72303|72094|13098|53973|15483|94224|110115|15487|15486|57357|15484|100041375|231396|15485|13105|78925|13099|15493|12846|13070|100727|13074|130…	http://www.genome.jp/kegg-bin/show_pathway?mmu00140/mmu:13112%09red/mmu:13113%09red/mmu:72082%09red/mmu:56448%09red/mmu:13114%09red/mmu:72303%09red/mmu:404195%09red/mmu:226105%09red/mmu:13097%09red/mmu:15487%09red/mmu:13099%09red/mmu:76279%09red/mmu:14979%09red/mmu:13123%09red/mmu:13095%09red/mmu:13094%09red/mmu:56388%09red/mmu:13079%09red/mmu:110115%09red/mmu:13090%09red/mmu:13098%09red/mmu:1053…
Inositol phosphate metabolism	KEGG PATHWAY	mmu00562	70	70	6.45e-05	0.000152059	64436|16331|16332|18707|18720|18705|18704|240752|242291|74769|72469|170835|114663|18718|269437|18706|212111|18795|18796|18797|114875|108083|52858|30955|18798|18799|16330|117150|56727|55980|269180|104776|225326|234779|69718|54384|228550|320404|71780|17330|233011|19211|74055|18719|269615|18717|18711|16329|84095|224020|75678|21991|219135|17772|77116|320634|19062|234515|107650|18802|18803|170749|2178…	http://www.genome.jp/kegg-bin/show_pathway?mmu00562/mmu:219135%09red/mmu:74302%09red/mmu:52858%09red/mmu:17330%09red/mmu:16330%09red/mmu:227733%09red/mmu:72469%09red/mmu:53332%09red/mmu:18706%09red/mmu:18720%09red/mmu:19062%09red/mmu:233011%09red/mmu:16331%09red/mmu:18707%09red/mmu:18704%09red/mmu:18705%09red/mmu:18717%09red/mmu:67073%09red/mmu:20975%09red/mmu:18795%09red/mmu:16332%09red/mmu:5438…
Natural killer cell mediated cytotoxicity	KEGG PATHWAY	mmu04650	105	121	6.49e-05	0.000152059	18646|379043|22177|18019|18018|15040|77777|234779|20963|14103|14102|11836|24055|271849|18803|17086|15980|18479|18176|16415|26413|26417|12981|12503|12506|170758|26395|26396|110157|19353|242519|19354|14127|16653|109880|18106|16408|16818|21926|246256|14939|12122|26904|15894|22035|15896|16640|16641|16642|16643|16635|20400|19058|19059|27007|19055|19056|19057|18750|18751|18752|21933|22637|14964|14784|1…	http://www.genome.jp/kegg-bin/show_pathway?mmu04650/mmu:379043%09red/mmu:16818%09red/mmu:17086%09red/mmu:15976%09red/mmu:15974%09red/mmu:15975%09red/mmu:170758%09red/mmu:21926%09red/mmu:15978%09red/mmu:15979%09red/mmu:77777%09red/mmu:14360%09red/mmu:26904%09red/mmu:15170%09red/mmu:19055%09red/mmu:19057%09red/mmu:19056%09red/mmu:19229%09red/mmu:19059%09red/mmu:19058%09red/mmu:12503%09red/mmu:12506…
Progesterone-mediated oocyte maturation	KEGG PATHWAY	mmu04914	84	90	6.51e-05	0.000152059	12877|16333|18707|18706|268930|14678|14677|19094|18709|12427|18710|17222|15519|26413|74769|69010|26416|26417|109880|26415|12428|16334|17120|26419|20111|15516|23797|12442|14679|66440|231207|71890|12566|26395|320207|16000|16001|56150|110157|56371|59008|52206|18817|26414|30955|18708|20112|66156|67579|11836|56317|18667|29857|110651|330228|268697|241634|52563|99152|74673|26420|208922|12534|11651|12532…	http://www.genome.jp/kegg-bin/show_pathway?mmu04914/mmu:74673%09red/mmu:320207%09red/mmu:241634%09red/mmu:18708%09red/mmu:71890%09red/mmu:432530%09red/mmu:56317%09red/mmu:210044%09red/mmu:217232%09red/mmu:52563%09red/mmu:208922%09red/mmu:12428%09red/mmu:12532%09red/mmu:11512%09red/mmu:12534%09red/mmu:11514%09red/mmu:11515%09red/mmu:12531%09red/mmu:12530%09red/mmu:18706%09red/mmu:68999%09red/mmu:1…
Melanoma	KEGG PATHWAY	mmu05218	71	72	7.64e-05	0.000177078	14174|14175|14176|14177|14170|18706|18176|14173|320207|18709|18708|14178|14179|56636|26413|74769|26417|109880|18707|18590|18591|18596|14171|18595|23797|12443|12015|30955|54635|12567|14166|26395|16000|16001|19645|13649|14169|80903|12571|71785|110157|242705|11836|17342|64654|19211|16653|12550|13645|14168|15461|17295|26396|14167|80857|14165|14164|12578|67112|15234|14180|14182|13557|18710|13555|12575…	http://www.genome.jp/kegg-bin/show_pathway?mmu05218/mmu:14179%09red/mmu:14178%09red/mmu:12571%09red/mmu:320207%09red/mmu:11651%09red/mmu:12575%09red/mmu:23797%09red/mmu:14170%09red/mmu:14173%09red/mmu:12578%09red/mmu:14175%09red/mmu:12550%09red/mmu:14177%09red/mmu:14176%09red/mmu:12015%09red/mmu:14169%09red/mmu:18708%09red/mmu:18709%09red/mmu:18706%09red/mmu:18707%09red/mmu:14167%09red/mmu:26417%…
Toll-like receptor signaling pathway	KEGG PATHWAY	mmu04620	91	101	7.86e-05	0.000180529	16476|20846|81897|12370|12524|12675|16160|29857|54123|26400|53791|26409|117149|16176|17087|16179|26413|26410|26416|26417|26414|26415|26419|54131|26395|26397|26396|26399|26398|19353|242519|17874|26420|68652|170743|12519|21926|14281|13038|16150|16151|22031|142980|22034|15945|19697|24088|23797|16803|320207|19766|21939|106759|170744|12475|17329|266632|18707|18706|66513|18709|18708|54473|18035|74769|1…	http://www.genome.jp/kegg-bin/show_pathway?mmu04620/mmu:17087%09red/mmu:15976%09red/mmu:15974%09red/mmu:15975%09red/mmu:19697%09red/mmu:12519%09red/mmu:21926%09red/mmu:81897%09red/mmu:14082%09red/mmu:117149%09red/mmu:17874%09red/mmu:225471%09red/mmu:15945%09red/mmu:26395%09red/mmu:26396%09red/mmu:26397%09red/mmu:26398%09red/mmu:26399%09red/mmu:19353%09red/mmu:16176%09red/mmu:19766%09red/mmu:16179…
Rheumatoid arthritis	KEGG PATHWAY	mmu05323	80	85	7.96e-05	0.000181436	16476|16171|15894|12487|21943|66144|15000|83995|338375|16415|16414|24088|15002|12981|108664|27060|20297|20293|11984|16193|12524|20311|13039|16168|20315|21898|66335|12477|21803|21934|110935|100504404|16176|76252|242341|69583|11600|16994|14961|14960|21871|15001|21687|11973|11972|14969|21926|66290|24099|11975|11974|16019|114143|21809|12977|17392|16408|12519|83430|68775|73834|14254|20304|14998|14999|…	http://www.genome.jp/kegg-bin/show_pathway?mmu05323/mmu:11972%09red/mmu:11973%09red/mmu:11600%09red/mmu:24088%09red/mmu:11974%09red/mmu:16408%09red/mmu:12977%09red/mmu:13038%09red/mmu:21943%09red/mmu:21809%09red/mmu:21808%09red/mmu:14999%09red/mmu:14998%09red/mmu:24099%09red/mmu:76252%09red/mmu:12519%09red/mmu:66290%09red/mmu:16193%09red/mmu:242341%09red/mmu:21926%09red/mmu:21803%09red/mmu:15978%…
p53 signaling pathway	KEGG PATHWAY	mmu04115	68	68	8.14e-05	0.000183896	12578|672195|140742|66940|98376|67874|21825|53892|75747|50883|12567|12370|22062|26374|22401|20135|22059|13067|12371|12444|12445|12442|12443|58801|11783|68428|107986|170770|57913|12448|12566|107831|16000|68098|22084|245000|16009|12521|23882|382985|14102|55948|20724|12447|268697|230784|19211|29870|20437|64058|17873|13063|12028|12649|20438|12367|12534|12450|12452|13663|12571|13197|12575|17248|11920|…	http://www.genome.jp/kegg-bin/show_pathway?mmu04115/mmu:12571%09red/mmu:13663%09red/mmu:12575%09red/mmu:107986%09red/mmu:12443%09red/mmu:12578%09red/mmu:12566%09red/mmu:50883%09red/mmu:12371%09red/mmu:12028%09red/mmu:12534%09red/mmu:66940%09red/mmu:170770%09red/mmu:21825%09red/mmu:13197%09red/mmu:12450%09red/mmu:12452%09red/mmu:12122%09red/mmu:22401%09red/mmu:11783%09red/mmu:18787%09red/mmu:55948…
Complement and coagulation cascades	KEGG PATHWAY	mmu04610	81	87	9.17e-05	0.000205676	109828|317677|19123|15160|109821|22371|14069|16644|12902|21824|69379|16415|16414|14058|12062|12061|230558|268591|16411|14071|333883|16621|14962|18791|18792|18793|12509|21788|12259|12258|12279|232345|13136|11537|50909|50908|12273|56373|12274|18815|14161|19128|22370|22789|17221|16409|385643|110135|17175|17174|15139|99571|14068|278180|14066|14067|12628|14065|14062|17195|14060|14061|58992|17194|14064…	http://www.genome.jp/kegg-bin/show_pathway?mmu04610/mmu:12279%09red/mmu:14058%09red/mmu:14062%09red/mmu:14071%09red/mmu:22370%09red/mmu:22371%09red/mmu:12274%09red/mmu:12759%09red/mmu:50908%09red/mmu:50909%09red/mmu:12062%09red/mmu:14161%09red/mmu:58992%09red/mmu:12258%09red/mmu:21824%09red/mmu:18816%09red/mmu:11537%09red/mmu:268591%09red/mmu:16644%09red/mmu:12630%09red/mmu:12259%09red/mmu:19128%…
RNA degradation	KEGG PATHWAY	mmu03018	78	83	0.00010018	0.0002228	104625|18459|18458|18642|72068|18641|67543|72162|72587|234594|18983|218343|93728|22057|225929|13209|109075|24127|24128|15510|234699|72544|74108|50912|13806|69125|66317|12227|56421|78893|194735|69639|56057|68533|69305|319618|73532|213550|66446|66373|67678|53621|76522|57316|78651|231464|67207|108077|75686|381404|70640|72198|230721|13808|103135|13807|241989|227715|27998|66583|66094|27756|58184|21010…	http://www.genome.jp/kegg-bin/show_pathway?mmu03018/mmu:72068%09red/mmu:53621%09red/mmu:227715%09red/mmu:234594%09red/mmu:72587%09red/mmu:210106%09red/mmu:18642%09red/mmu:18641%09red/mmu:13209%09red/mmu:72162%09red/mmu:70640%09red/mmu:319618%09red/mmu:230721%09red/mmu:69125%09red/mmu:104625%09red/mmu:58184%09red/mmu:57259%09red/mmu:50912%09red/mmu:24128%09red/mmu:13808%09red/mmu:27756%09red/mmu:2…
Gastric acid secretion	KEGG PATHWAY	mmu04971	71	73	0.000101003	0.000222848	16518|70405|14679|16526|14677|18798|11944|11945|22350|20544|18795|12426|12638|16439|16438|72258|12323|14459|494124|107589|12349|18796|18797|246133|56379|14678|12671|18752|18750|18751|12314|12315|11461|12313|228785|27222|20606|11933|11932|11931|80796|238564|20535|232975|110895|16535|108058|16513|16516|16517|213435|208890|98660|16440|15466|67821|14682|14683|11515|210044|11513|11512|11928|12322|2241…	http://www.genome.jp/kegg-bin/show_pathway?mmu04971/mmu:12313%09red/mmu:22350%09red/mmu:18798%09red/mmu:110895%09red/mmu:14683%09red/mmu:14682%09red/mmu:210044%09red/mmu:224129%09red/mmu:11945%09red/mmu:70405%09red/mmu:232975%09red/mmu:11512%09red/mmu:16516%09red/mmu:11514%09red/mmu:11515%09red/mmu:494124%09red/mmu:20544%09red/mmu:12671%09red/mmu:98660%09red/mmu:67821%09red/mmu:18795%09red/mmu:27…
Glycolysis / Gluconeogenesis	KEGG PATHWAY	mmu00010	66	66	0.000102642	0.00022468	60525|56752|74551|12183|15277|72141|18648|100042427|14751|18598|67689|11522|16828|18642|14121|11529|212032|13806|21991|14433|216019|56421|18641|100039229|11669|103988|235339|13382|73458|17330|18655|56847|66681|72157|18770|26876|14120|14378|230163|16833|16832|106557|14447|72535|13807|18663|110695|14377|11670|11671|11674|11676|11532|68401|18597|353204|68263|18746|319625|68738|58810|621603|15275|433…	http://www.genome.jp/kegg-bin/show_pathway?mmu00010/mmu:212032%09red/mmu:14751%09red/mmu:15277%09red/mmu:235339%09red/mmu:17330%09red/mmu:15275%09red/mmu:72141%09red/mmu:58810%09red/mmu:18642%09red/mmu:18641%09red/mmu:11532%09red/mmu:18648%09red/mmu:18663%09red/mmu:11671%09red/mmu:56752%09red/mmu:353204%09red/mmu:11669%09red/mmu:18746%09red/mmu:21991%09red/mmu:13807%09red/mmu:13808%09red/mmu:1412…
Glioma	KEGG PATHWAY	mmu05214	65	65	0.0001153	0.000250417	70405|18707|18706|18176|320207|18709|18708|56717|18750|15461|74769|26417|109880|26396|18590|18591|18596|18595|23797|12315|30955|216148|12314|12567|18752|26395|18751|16000|16001|19645|12313|234779|12571|22059|110157|242705|19211|494124|11836|18710|108058|14784|16653|13645|20418|20663|20662|20416|13649|12443|12578|11651|271849|26413|18803|13557|13555|12575|12323|12322|21802|12325|11652|17246|80796	http://www.genome.jp/kegg-bin/show_pathway?mmu05214/mmu:12313%09red/mmu:12571%09red/mmu:320207%09red/mmu:11651%09red/mmu:12575%09red/mmu:23797%09red/mmu:16000%09red/mmu:12578%09red/mmu:70405%09red/mmu:18708%09red/mmu:18709%09red/mmu:18706%09red/mmu:18707%09red/mmu:18596%09red/mmu:21802%09red/mmu:26417%09red/mmu:12322%09red/mmu:26413%09red/mmu:18176%09red/mmu:56717%09red/mmu:14784%09red/mmu:11836%…
B cell receptor signaling pathway	KEGG PATHWAY	mmu04662	72	75	0.000118107	0.000254524	240354|12483|16332|12517|16476|18706|18176|16331|320207|18709|18708|12902|56637|108723|18035|19697|74769|17060|26417|18033|26377|18707|18019|18018|23797|19058|19059|12520|12675|30955|170758|19055|19056|19057|26395|18751|14281|17096|110157|234779|18036|22325|19353|20963|18733|19354|18710|14784|16653|15170|12042|16150|18021|20663|20662|26396|11651|12518|15461|26413|22324|12478|18037|240168|57257|83…	http://www.genome.jp/kegg-bin/show_pathway?mmu04662/mmu:16476%09red/mmu:17060%09red/mmu:320207%09red/mmu:18709%09red/mmu:12517%09red/mmu:23797%09red/mmu:12042%09red/mmu:240354%09red/mmu:18033%09red/mmu:18706%09red/mmu:19697%09red/mmu:170758%09red/mmu:18708%09red/mmu:12518%09red/mmu:16331%09red/mmu:12675%09red/mmu:16332%09red/mmu:240168%09red/mmu:14130%09red/mmu:26417%09red/mmu:12478%09red/mmu:264…
Renal cell carcinoma	KEGG PATHWAY	mmu05211	67	68	0.000121594	0.00025959	16476|19247|14388|18707|20525|18176|12929|12928|18709|12540|217066|15461|74769|70584|26417|109880|13819|18479|216805|18591|18706|23797|320207|26413|107746|21802|109905|14194|26395|11836|67673|328572|241656|110157|19353|18481|112405|67923|215449|22346|112407|14784|16653|23871|71745|11652|12914|214230|20663|17295|26396|112406|18708|224105|20662|56438|15234|15251|18710|11863|21803|11864|22339|30955|…	http://www.genome.jp/kegg-bin/show_pathway?mmu05211/mmu:224105%09red/mmu:320207%09red/mmu:215449%09red/mmu:18708%09red/mmu:23871%09red/mmu:23797%09red/mmu:67923%09red/mmu:67673%09red/mmu:21809%09red/mmu:21808%09red/mmu:71745%09red/mmu:241656%09red/mmu:18706%09red/mmu:18707%09red/mmu:21803%09red/mmu:21802%09red/mmu:18481%09red/mmu:214230%09red/mmu:26417%09red/mmu:30955%09red/mmu:19247%09red/mmu:20…
Salivary secretion	KEGG PATHWAY	mmu04970	74	78	0.000122325	0.00025959	67821|70405|17105|18798|54195|71395|76113|74180|20544|19092|494124|16439|16438|11548|12945|18750|18796|18797|20192|381290|17110|12671|12314|11549|18751|20496|12315|27222|12313|64177|11936|381833|11933|11932|11931|80796|20535|16531|232975|12494|16534|18795|212989|239134|19091|11830|11550|11555|11554|18125|11556|67972|98660|16440|11941|12182|320707|60596|14682|14683|11515|210044|18752|11513|11512|1…	http://www.genome.jp/kegg-bin/show_pathway?mmu04970/mmu:12313%09red/mmu:12494%09red/mmu:18798%09red/mmu:212989%09red/mmu:13010%09red/mmu:14683%09red/mmu:11555%09red/mmu:74180%09red/mmu:224129%09red/mmu:11550%09red/mmu:11549%09red/mmu:70405%09red/mmu:232975%09red/mmu:11512%09red/mmu:11513%09red/mmu:11514%09red/mmu:11515%09red/mmu:20544%09red/mmu:12671%09red/mmu:67821%09red/mmu:19092%09red/mmu:2722…
Pancreatic secretion	KEGG PATHWAY	mmu04972	91	103	0.000125252	0.000263789	53313|67373|229933|22072|18795|18796|18797|18798|17274|13487|18778|99663|67972|23844|56373|320707|210044|26565|109905|67868|12425|319229|20191|232680|11938|11937|11936|11933|11932|11931|19353|20535|215449|69060|12722|98660|14683|11515|11514|237625|11513|11512|11928|224129|12873|12671|19340|11941|12638|16439|16438|18750|18751|18752|67653|26971|26970|16531|16535|14682|12182|12349|76703|53869|67821|…	http://www.genome.jp/kegg-bin/show_pathway?mmu04972/mmu:67373%09red/mmu:432530%09red/mmu:17274%09red/mmu:237625%09red/mmu:27222%09red/mmu:12613%09red/mmu:19340%09red/mmu:11928%09red/mmu:232680%09red/mmu:12349%09red/mmu:53313%09red/mmu:12425%09red/mmu:19353%09red/mmu:20191%09red/mmu:11938%09red/mmu:11936%09red/mmu:11937%09red/mmu:16440%09red/mmu:11932%09red/mmu:11933%09red/mmu:11931%09red/mmu:2207…
Thyroid hormone synthesis	KEGG PATHWAY	mmu04918	69	71	0.000127364	0.000266219	67821|74044|114479|69590|75512|22018|18795|22130|104111|16439|16438|11889|22095|14776|18747|18796|14775|12915|208677|18798|14778|18750|18751|18752|27222|70337|224129|12330|11932|21819|22027|14828|66811|232975|231991|12912|12913|67305|14782|14780|18797|12640|11514|11936|26427|14682|16440|98660|11890|23985|214593|14683|11911|11515|210044|14725|11513|11512|11928|12304|18510|11933|78284|11931|22094|4…	http://www.genome.jp/kegg-bin/show_pathway?mmu04918/mmu:22130%09red/mmu:11890%09red/mmu:18798%09red/mmu:18747%09red/mmu:14683%09red/mmu:14682%09red/mmu:210044%09red/mmu:74044%09red/mmu:12330%09red/mmu:232975%09red/mmu:11512%09red/mmu:11513%09red/mmu:11514%09red/mmu:11515%09red/mmu:214593%09red/mmu:23985%09red/mmu:12912%09red/mmu:98660%09red/mmu:67821%09red/mmu:27222%09red/mmu:67305%09red/mmu:1041…
Colorectal cancer	KEGG PATHWAY	mmu05210	64	64	0.000129531	0.000268729	16476|672195|18707|18706|320207|18709|18708|19730|56637|23797|72993|74769|26417|109880|26419|17126|17127|22059|13067|12371|17869|13063|12443|26413|30955|170758|17686|11789|26395|21803|21813|21812|17688|67653|26414|110157|19353|19354|11836|18710|17350|12043|17685|16842|12028|26420|12367|11799|11652|21415|21414|12006|21416|12387|12005|17128|23805|12015|14281|11848|21808|21809|11651|13176	http://www.genome.jp/kegg-bin/show_pathway?mmu05210/mmu:12043%09red/mmu:11789%09red/mmu:72993%09red/mmu:11848%09red/mmu:12371%09red/mmu:21808%09red/mmu:12015%09red/mmu:67653%09red/mmu:18708%09red/mmu:18709%09red/mmu:18706%09red/mmu:18707%09red/mmu:21803%09red/mmu:17686%09red/mmu:12005%09red/mmu:17685%09red/mmu:26417%09red/mmu:26414%09red/mmu:26413%09red/mmu:320207%09red/mmu:19730%09red/mmu:22059%…
Hematopoietic cell lineage	KEGG PATHWAY	mmu04640	80	87	0.000132181	0.000272194	12482|12483|13857|13856|16400|12484|12490|12489|12902|16157|12986|12985|16416|12982|12981|16194|109700|17380|16197|16190|16196|16192|16193|12525|12502|12527|12500|12507|12505|12504|12509|16403|16191|17311|12526|16401|12491|12501|12493|12494|14129|14128|14969|21832|21673|12479|14255|14256|16187|12475|12978|22042|12977|333883|16188|54368|16409|14729|16590|12480|100042555|16790|12516|12478|14724|233…	http://www.genome.jp/kegg-bin/show_pathway?mmu04640/mmu:17311%09red/mmu:12986%09red/mmu:12490%09red/mmu:233274%09red/mmu:16409%09red/mmu:12493%09red/mmu:100038993%09red/mmu:16403%09red/mmu:16402%09red/mmu:16399%09red/mmu:16400%09red/mmu:16199%09red/mmu:14723%09red/mmu:16398%09red/mmu:12516%09red/mmu:16191%09red/mmu:16190%09red/mmu:16193%09red/mmu:16192%09red/mmu:21926%09red/mmu:16194%09red/mmu:14…
Long-term potentiation	KEGG PATHWAY	mmu04720	65	66	0.000153443	0.00030911	14799|70405|26396|18176|14814|12323|18750|110651|26413|26417|109880|16439|16438|20111|58200|18795|19058|19059|18796|18797|80796|14816|18798|19055|19056|19057|26395|18751|12314|12315|12313|20112|12326|14800|494124|14811|215449|11836|12914|108058|432530|16653|108071|15461|16440|12288|110157|14682|11911|19047|19046|19045|18752|18747|12322|109905|328572|14813|14812|12325|14810|223864|67071|11514|18749	http://www.genome.jp/kegg-bin/show_pathway?mmu04720/mmu:12313%09red/mmu:18749%09red/mmu:215449%09red/mmu:432530%09red/mmu:14682%09red/mmu:14814%09red/mmu:14812%09red/mmu:14813%09red/mmu:14810%09red/mmu:14811%09red/mmu:19056%09red/mmu:11514%09red/mmu:18798%09red/mmu:26417%09red/mmu:18795%09red/mmu:110651%09red/mmu:26413%09red/mmu:20111%09red/mmu:20112%09red/mmu:18176%09red/mmu:19055%09red/mmu:1481…
Pancreatic cancer	KEGG PATHWAY	mmu05212	65	66	0.000153443	0.00030911	242705|20848|18707|18706|19361|320207|18709|18708|19730|23797|19697|74769|26417|109880|12540|12190|26419|17126|17127|16451|12371|18033|12443|12675|30955|170758|12567|26395|21813|21812|19765|19645|12015|26414|110157|19353|73341|19354|11836|13866|18710|56044|20846|16150|13645|21809|12048|13649|26420|18805|12578|11652|26413|12571|13557|17128|13555|64143|21802|21803|22059|22339|21808|16151|11651	http://www.genome.jp/kegg-bin/show_pathway?mmu05212/mmu:12571%09red/mmu:12048%09red/mmu:23797%09red/mmu:12443%09red/mmu:12578%09red/mmu:18033%09red/mmu:22339%09red/mmu:12371%09red/mmu:21808%09red/mmu:19697%09red/mmu:170758%09red/mmu:18708%09red/mmu:56044%09red/mmu:18706%09red/mmu:12675%09red/mmu:21803%09red/mmu:21802%09red/mmu:64143%09red/mmu:13866%09red/mmu:19361%09red/mmu:26414%09red/mmu:26413%…
Central carbon metabolism in cancer	KEGG PATHWAY	mmu05230	65	66	0.000153443	0.00030911	15251|18707|20525|18176|18641|19713|14381|14380|18710|56717|18213|26413|74769|26417|16828|18642|18598|18596|18597|18706|212032|23797|17869|22059|20526|216019|56421|26395|320207|228026|26396|110157|216456|80879|18595|18709|18708|100126824|14660|13866|19211|16653|20539|14255|18648|15277|15461|17295|20514|13649|50721|16590|18211|103988|14183|14182|14184|64384|18746|319801|30955|11652|11651|68263|152…	http://www.genome.jp/kegg-bin/show_pathway?mmu05230/mmu:14660%09red/mmu:320207%09red/mmu:64384%09red/mmu:23797%09red/mmu:319801%09red/mmu:100126824%09red/mmu:18642%09red/mmu:18641%09red/mmu:212032%09red/mmu:18708%09red/mmu:18709%09red/mmu:18706%09red/mmu:18707%09red/mmu:18648%09red/mmu:20526%09red/mmu:228026%09red/mmu:14184%09red/mmu:20525%09red/mmu:18211%09red/mmu:14182%09red/mmu:14183%09red/mmu…
Metabolism of xenobiotics by cytochrome P450	KEGG PATHWAY	mmu00980	64	65	0.000172396	0.000344792	14871|14870|22238|14872|22236|14859|14858|71755|13107|14865|67689|11522|94215|11529|56847|12408|12409|14873|112417|613123|103140|11670|15483|76263|109857|73458|394433|13106|435489|20859|68214|14866|14867|14864|72094|14862|14863|14860|66447|13849|243085|26876|14869|552899|54486|94284|110198|68312|211666|394435|100727|13076|13077|13078|11532|74134|394436|56615|394434|71773|394432|231396|394430|6216…	http://www.genome.jp/kegg-bin/show_pathway?mmu00980/mmu:112417%09red/mmu:110198%09red/mmu:14870%09red/mmu:14871%09red/mmu:14872%09red/mmu:14873%09red/mmu:94284%09red/mmu:13849%09red/mmu:68214%09red/mmu:11532%09red/mmu:14858%09red/mmu:14859%09red/mmu:68312%09red/mmu:211666%09red/mmu:54486%09red/mmu:72094%09red/mmu:15483%09red/mmu:74134%09red/mmu:76263%09red/mmu:56615%09red/mmu:100727%09red/mmu:243…
Protein digestion and absorption	KEGG PATHWAY	mmu04974	81	90	0.000191793	0.000380847	170745|67821|12873|12835|12813|94216|16529|12834|12836|215335|12832|67373|12815|12842|12817|12830|67868|12843|20540|20541|12839|72461|12819|17380|22072|373864|11928|12827|232680|57442|12816|13717|12818|58803|27222|73626|68553|13482|17254|11932|11931|232975|20532|16534|16535|17288|20514|245026|56643|76703|665033|12828|12829|12826|11936|12824|12825|12840|72472|12821|12822|12833|56373|74338|98660|12…	http://www.genome.jp/kegg-bin/show_pathway?mmu04974/mmu:67373%09red/mmu:12815%09red/mmu:665033%09red/mmu:72461%09red/mmu:22072%09red/mmu:20532%09red/mmu:17254%09red/mmu:232975%09red/mmu:20541%09red/mmu:20540%09red/mmu:67868%09red/mmu:12832%09red/mmu:16529%09red/mmu:110891%09red/mmu:67821%09red/mmu:12842%09red/mmu:69700%09red/mmu:12840%09red/mmu:27222%09red/mmu:17288%09red/mmu:12843%09red/mmu:1728…
Leishmaniasis	KEGG PATHWAY	mmu05140	65	67	0.000202728	0.00039689	16476|21809|22034|18033|66513|14131|17969|15000|20846|16415|19697|24088|26416|15002|15001|26415|16451|16452|21898|246256|13712|16412|18751|14281|16160|100504404|18036|14969|15979|15978|14961|14960|14129|19094|17357|21926|29857|15170|17874|16019|18126|16401|26409|16409|68652|18035|16153|26413|14998|14999|16414|17970|17972|16159|19225|21803|16176|16175|21808|266632|16179|12266|13057|15980|26417	http://www.genome.jp/kegg-bin/show_pathway?mmu05140/mmu:14131%09red/mmu:16409%09red/mmu:22034%09red/mmu:16401%09red/mmu:21809%09red/mmu:21808%09red/mmu:14999%09red/mmu:14998%09red/mmu:19697%09red/mmu:246256%09red/mmu:21803%09red/mmu:21926%09red/mmu:15978%09red/mmu:15979%09red/mmu:26417%09red/mmu:26416%09red/mmu:26415%09red/mmu:26413%09red/mmu:19094%09red/mmu:68652%09red/mmu:13712%09red/mmu:18033%…
Drug metabolism - cytochrome P450	KEGG PATHWAY	mmu00982	65	67	0.000202728	0.00039689	14871|14870|22238|14872|22236|14859|14858|243085|394436|72094|67689|11522|17161|94215|14261|14262|56847|14873|226565|226564|103140|11529|71724|76263|11670|109731|240894|552899|394433|13106|14263|112417|68214|14866|14867|14864|213043|14862|14863|14860|66447|613123|71872|26876|14869|73458|54486|11761|68312|211666|394435|100727|13077|14865|11532|94284|55990|56615|394434|71773|394432|231396|394430|62…	http://www.genome.jp/kegg-bin/show_pathway?mmu00982/mmu:112417%09red/mmu:17161%09red/mmu:14870%09red/mmu:14871%09red/mmu:14872%09red/mmu:14873%09red/mmu:94284%09red/mmu:226604%09red/mmu:11761%09red/mmu:68214%09red/mmu:11532%09red/mmu:14858%09red/mmu:14859%09red/mmu:226564%09red/mmu:226565%09red/mmu:211666%09red/mmu:54486%09red/mmu:240894%09red/mmu:71724%09red/mmu:71872%09red/mmu:213043%09red/mmu:…
Inflammatory bowel disease (IBD)	KEGG PATHWAY	mmu05321	59	59	0.000232147	0.000448172	257632|16476|20849|20848|16159|16162|20846|19697|257630|15002|15001|15000|60504|60505|16190|17127|16193|18018|21898|20371|17126|18033|16191|16161|16160|16163|16171|20852|100504404|15979|15978|14961|14960|50929|57765|24088|14969|21926|19885|16183|21808|53791|16186|209590|17132|83430|19883|16182|14998|14999|16173|21803|16176|16174|16175|16019|21809|16153|15980	http://www.genome.jp/kegg-bin/show_pathway?mmu05321/mmu:209590%09red/mmu:21809%09red/mmu:21808%09red/mmu:14999%09red/mmu:14998%09red/mmu:19697%09red/mmu:19883%09red/mmu:16191%09red/mmu:16190%09red/mmu:21803%09red/mmu:21926%09red/mmu:16193%09red/mmu:15978%09red/mmu:15979%09red/mmu:257630%09red/mmu:20371%09red/mmu:60505%09red/mmu:60504%09red/mmu:16186%09red/mmu:18033%09red/mmu:16162%09red/mmu:16171…
Glycerolipid metabolism	KEGG PATHWAY	mmu00561	59	59	0.000232147	0.000448172	15450|225913|231510|56752|52123|116939|215456|320127|14245|55979|68262|12613|67861|380921|19012|218121|14732|28169|11669|11605|68393|50784|104418|110524|67512|13350|217480|227333|16891|14626|225010|67717|69060|110197|23945|16956|72535|67916|110695|66853|11997|11671|102247|18947|18946|69923|67800|11677|14187|235582|56077|67216|14933|331374|58810|64898|64899|233549|13139	http://www.genome.jp/kegg-bin/show_pathway?mmu00561/mmu:116939%09red/mmu:231510%09red/mmu:67512%09red/mmu:102247%09red/mmu:11605%09red/mmu:218121%09red/mmu:331374%09red/mmu:11997%09red/mmu:14732%09red/mmu:380921%09red/mmu:14933%09red/mmu:225913%09red/mmu:69923%09red/mmu:67717%09red/mmu:11669%09red/mmu:67861%09red/mmu:55979%09red/mmu:56752%09red/mmu:14187%09red/mmu:235582%09red/mmu:233549%09red/mm…
Fc epsilon RI signaling pathway	KEGG PATHWAY	mmu04664	66	69	0.000236772	0.000453949	16331|14389|18707|18706|18176|329502|320207|18709|18708|18710|18607|18750|15461|16822|26416|26417|12981|26415|14360|26419|16191|232889|23797|211429|102238433|170758|16163|26395|19094|26397|20963|17096|18783|14126|26399|26398|26414|110157|19353|19354|14127|29857|14125|14784|16653|26400|16187|20663|20662|26396|26420|78390|16797|234779|26413|271844|22324|18803|74769|22325|21926|57257|30955|11652|116…	http://www.genome.jp/kegg-bin/show_pathway?mmu04664/mmu:22325%09red/mmu:320207%09red/mmu:22324%09red/mmu:23797%09red/mmu:17096%09red/mmu:16191%09red/mmu:16797%09red/mmu:18706%09red/mmu:78390%09red/mmu:170758%09red/mmu:18708%09red/mmu:18709%09red/mmu:16331%09red/mmu:18707%09red/mmu:21926%09red/mmu:20963%09red/mmu:26417%09red/mmu:26416%09red/mmu:26415%09red/mmu:26414%09red/mmu:26413%09red/mmu:19094…
Synaptic vesicle cycle	KEGG PATHWAY	mmu04721	61	62	0.000244642	0.000465824	13852|20910|20614|66144|18195|12890|338375|214084|20508|13429|27060|108664|11984|11964|22348|74325|12757|66335|12889|72961|108124|103967|110935|22249|11972|242341|19339|20907|21871|140919|232910|11973|67300|76252|66290|56216|20908|11974|216227|12286|12287|11975|382018|13430|114143|11773|208898|225644|68775|73834|140494|235415|116837|11966|71770|11771|22318|110877|11772|74915|20979	http://www.genome.jp/kegg-bin/show_pathway?mmu04721/mmu:11972%09red/mmu:140919%09red/mmu:216227%09red/mmu:11974%09red/mmu:11973%09red/mmu:20910%09red/mmu:74325%09red/mmu:225644%09red/mmu:11975%09red/mmu:20979%09red/mmu:76252%09red/mmu:66290%09red/mmu:242341%09red/mmu:12757%09red/mmu:235415%09red/mmu:56216%09red/mmu:27060%09red/mmu:140494%09red/mmu:22249%09red/mmu:66144%09red/mmu:12890%09red/mmu:1…
Amphetamine addiction	KEGG PATHWAY	mmu05031	65	68	0.000265951	0.000502955	14799|70405|16476|21823|242443|14814|12314|214084|208647|17161|53623|12323|109731|19058|19059|80796|13488|208677|19055|19056|19057|18750|18751|14802|12315|12313|433759|13162|78284|12912|12326|20907|14800|494124|14811|11838|231991|18610|108058|12913|12915|224129|26427|12288|12289|93759|14683|19049|11911|19047|19046|19045|18752|13195|14282|12322|14281|14813|14812|12325|14810|110877|11909|18747|18749	http://www.genome.jp/kegg-bin/show_pathway?mmu05031/mmu:12313%09red/mmu:20907%09red/mmu:17161%09red/mmu:14683%09red/mmu:13488%09red/mmu:14814%09red/mmu:224129%09red/mmu:14812%09red/mmu:14813%09red/mmu:14810%09red/mmu:14811%09red/mmu:208677%09red/mmu:93759%09red/mmu:242443%09red/mmu:21823%09red/mmu:13195%09red/mmu:18747%09red/mmu:433759%09red/mmu:18749%09red/mmu:19055%09red/mmu:13162%09red/mmu:190…
Bile secretion	KEGG PATHWAY	mmu04976	67	71	0.00027477	0.000513038	67821|11829|20525|11936|11826|20535|64008|106407|20544|19879|20778|26357|23957|12638|28248|319229|18669|12349|28250|232156|28254|26459|27413|12012|20494|13122|20493|27222|54403|11933|20859|11931|239273|108096|18671|232975|28253|13849|67470|11833|15357|16835|320024|108114|11512|20517|20186|27409|98660|14683|20181|11515|210044|105243|140492|11513|11932|11928|224129|104111|432530|76408|12780|11514|2…	http://www.genome.jp/kegg-bin/show_pathway?mmu04976/mmu:16835%09red/mmu:11826%09red/mmu:14683%09red/mmu:11829%09red/mmu:210044%09red/mmu:27413%09red/mmu:18747%09red/mmu:23957%09red/mmu:232975%09red/mmu:232156%09red/mmu:319229%09red/mmu:18669%09red/mmu:13849%09red/mmu:20544%09red/mmu:28253%09red/mmu:26459%09red/mmu:28250%09red/mmu:67470%09red/mmu:28254%09red/mmu:67821%09red/mmu:11514%09red/mmu:140…
Long-term depression	KEGG PATHWAY	mmu04730	60	61	0.000274974	0.000513038	12921|14799|26396|18176|14678|14677|54195|14673|14672|14674|26413|73699|26417|109880|16439|16438|53623|232889|18750|18796|18797|20190|211429|102238433|19052|19053|18798|18752|51792|26395|18751|16000|16001|14804|110157|17096|12918|14800|18795|11836|239134|78390|16653|19091|19092|329502|12286|18125|15461|16440|14687|60596|14682|14683|14681|271844|14816|19051|18783|14679	http://www.genome.jp/kegg-bin/show_pathway?mmu04730/mmu:73699%09red/mmu:78390%09red/mmu:14673%09red/mmu:14683%09red/mmu:14682%09red/mmu:14681%09red/mmu:14687%09red/mmu:19052%09red/mmu:26417%09red/mmu:19092%09red/mmu:26413%09red/mmu:12921%09red/mmu:232889%09red/mmu:18176%09red/mmu:51792%09red/mmu:14816%09red/mmu:19051%09red/mmu:18783%09red/mmu:19053%09red/mmu:109880%09red/mmu:20190%09red/mmu:14678…
Acute myeloid leukemia	KEGG PATHWAY	mmu05221	57	57	0.000293396	0.000543761	20848|18707|18706|18176|320207|18709|18708|18710|56717|19697|74769|26417|109880|12427|72508|110157|23797|17869|16842|12443|12675|58988|12394|18854|20375|26395|26396|20850|13685|18033|19401|20851|15461|19015|11836|18715|14784|16653|18712|14255|16150|16480|26413|235320|20663|20662|12606|16590|12395|21416|21415|21414|12015|30955|11652|16151|11651	http://www.genome.jp/kegg-bin/show_pathway?mmu05221/mmu:13685%09red/mmu:23797%09red/mmu:18709%09red/mmu:18033%09red/mmu:18854%09red/mmu:19697%09red/mmu:18708%09red/mmu:18707%09red/mmu:18706%09red/mmu:12675%09red/mmu:12395%09red/mmu:12394%09red/mmu:26417%09red/mmu:20375%09red/mmu:20850%09red/mmu:26413%09red/mmu:235320%09red/mmu:21416%09red/mmu:320207%09red/mmu:18176%09red/mmu:16590%09red/mmu:18710…
Ribosome biogenesis in eukaryotes	KEGG PATHWAY	mmu03008	75	83	0.000298521	0.000549596	217109|67459|75471|66161|30877|14791|67619|110816|27993|195434|24127|24128|66711|434234|237730|52530|237107|59028|245610|67282|213895|269470|225348|67045|54364|16418|56488|105372|100019|13001|101592|230082|216987|19428|55989|71340|13000|14113|19384|245474|66932|237082|224092|73736|74778|69961|66181|57815|21453|12995|53319|117109|72554|104444|74097|208366|83454|170722|21771|68147|103573|98956|9711…	http://www.genome.jp/kegg-bin/show_pathway?mmu03008/mmu:12995%09red/mmu:53319%09red/mmu:237082%09red/mmu:75471%09red/mmu:73674%09red/mmu:230082%09red/mmu:227522%09red/mmu:217109%09red/mmu:52530%09red/mmu:102216272%09red/mmu:83454%09red/mmu:213773%09red/mmu:67459%09red/mmu:102462%09red/mmu:213895%09red/mmu:105372%09red/mmu:68147%09red/mmu:13001%09red/mmu:66161%09red/mmu:74097%09red/mmu:208366%09re…
NF-kappa B signaling pathway	KEGG PATHWAY	mmu04064	89	104	0.00030404	0.000556073	240354|18761|59004|11545|17000|21943|18792|12675|234779|20963|13001|13000|100862177|19766|26409|230073|18803|117149|16176|16177|17087|16179|17096|22034|16150|22029|17874|12995|17873|68652|16818|21926|11920|16151|21929|22030|22031|21947|22033|15894|100504346|66724|19697|12633|19698|16803|18751|21934|21937|21939|53859|57913|22637|16797|24099|106759|12475|19225|266632|12229|217069|66513|108723|18035…	http://www.genome.jp/kegg-bin/show_pathway?mmu04064/mmu:217069%09red/mmu:18034%09red/mmu:17087%09red/mmu:21929%09red/mmu:19697%09red/mmu:71609%09red/mmu:19698%09red/mmu:72049%09red/mmu:19225%09red/mmu:17873%09red/mmu:17874%09red/mmu:240354%09red/mmu:225471%09red/mmu:12229%09red/mmu:16992%09red/mmu:16994%09red/mmu:17000%09red/mmu:16176%09red/mmu:19766%09red/mmu:16179%09red/mmu:17060%09red/mmu:1876…
Non-small cell lung cancer	KEGG PATHWAY	mmu05223	56	56	0.000329897	0.000599422	12571|18707|18706|18176|320207|18709|18708|18710|18607|18750|26413|74769|26417|109880|54354|22059|12371|14198|12443|12015|30955|12567|11682|26395|18751|18752|26396|19645|110157|78798|234779|242705|58231|23797|11836|13866|14784|16653|218772|56484|13645|20663|20662|13649|12578|20182|20183|15461|18803|20181|13557|13555|21802|11652|11651|56289	http://www.genome.jp/kegg-bin/show_pathway?mmu05223/mmu:12571%09red/mmu:320207%09red/mmu:23797%09red/mmu:12578%09red/mmu:12371%09red/mmu:12015%09red/mmu:56289%09red/mmu:18708%09red/mmu:18709%09red/mmu:18706%09red/mmu:18707%09red/mmu:21802%09red/mmu:11682%09red/mmu:13866%09red/mmu:26413%09red/mmu:18176%09red/mmu:14784%09red/mmu:11836%09red/mmu:20662%09red/mmu:20663%09red/mmu:18752%09red/mmu:26417%…
Renin secretion	KEGG PATHWAY	mmu04924	67	72	0.000355777	0.000642247	70405|23844|14679|14678|14677|54195|12314|12722|19219|18795|229933|16439|16438|19058|19059|18796|18797|12315|54652|12292|16531|13617|18798|19055|19056|19057|11607|11606|12313|11421|11608|80797|19701|16518|11826|494124|18160|54611|12912|239134|19217|19092|229927|11555|11554|11556|109305|16440|12288|12289|11539|60596|14682|14683|11517|11516|11512|18574|18575|18576|224129|18573|99663|80796|13030|187…	http://www.genome.jp/kegg-bin/show_pathway?mmu04924/mmu:12313%09red/mmu:13030%09red/mmu:11606%09red/mmu:11607%09red/mmu:11826%09red/mmu:14683%09red/mmu:11555%09red/mmu:11556%09red/mmu:224129%09red/mmu:11608%09red/mmu:70405%09red/mmu:11512%09red/mmu:11539%09red/mmu:18160%09red/mmu:11516%09red/mmu:11517%09red/mmu:12912%09red/mmu:18795%09red/mmu:19092%09red/mmu:12292%09red/mmu:18747%09red/mmu:102643…
Basal cell carcinoma	KEGG PATHWAY	mmu05217	55	55	0.000370987	0.000665383	13542|93897|13543|19207|19206|14369|14368|22413|22409|22408|20423|22422|22423|14632|22421|22420|14365|14370|14367|14634|24069|14362|16842|15245|269209|11789|12159|22414|12156|14366|20890|57265|319757|14633|56637|22415|22419|22416|22417|93735|14371|22412|216795|22410|22411|13544|21416|21415|21414|12006|12387|12005|23805|22059|22418	http://www.genome.jp/kegg-bin/show_pathway?mmu05217/mmu:22408%09red/mmu:15245%09red/mmu:56637%09red/mmu:319757%09red/mmu:13543%09red/mmu:13542%09red/mmu:13544%09red/mmu:14365%09red/mmu:22420%09red/mmu:20423%09red/mmu:20890%09red/mmu:12005%09red/mmu:19207%09red/mmu:14368%09red/mmu:14369%09red/mmu:22421%09red/mmu:93897%09red/mmu:14362%09red/mmu:22422%09red/mmu:22423%09red/mmu:19206%09red/mmu:93735%…
Legionellosis	KEGG PATHWAY	mmu05134	57	58	0.000390728	0.000696297	672195|66824|19324|13628|16415|19697|24088|17940|18033|11783|15511|268973|15512|17948|330122|16193|13067|12371|20310|13063|20333|21898|56422|12176|16160|76308|269523|12370|67160|15482|21926|66397|14825|17874|15510|53791|16409|12367|18035|13627|12362|12475|18034|94044|17952|12747|16159|17951|12369|20224|16173|16176|16414|193740|12266|15499|11840	http://www.genome.jp/kegg-bin/show_pathway?mmu05134/mmu:67160%09red/mmu:18033%09red/mmu:76308%09red/mmu:16409%09red/mmu:15512%09red/mmu:12371%09red/mmu:12370%09red/mmu:269523%09red/mmu:19697%09red/mmu:16193%09red/mmu:56422%09red/mmu:21926%09red/mmu:66824%09red/mmu:330122%09red/mmu:15482%09red/mmu:12369%09red/mmu:11840%09red/mmu:268973%09red/mmu:20333%09red/mmu:18034%09red/mmu:18035%09red/mmu:1247…
Parkinson's disease	KEGG PATHWAY	mmu05012	117	149	0.000418336	0.000739371	105675|67273|14678|14677|57320|67847|11540|110323|11783|12371|18951|14679|13489|13488|11947|13162|227197|66377|22187|66152|67264|407785|17995|17993|17992|17991|140499|74153|22272|22273|66576|64704|672195|67942|56228|66414|50873|12859|214084|225887|66495|69875|333182|12857|66091|78330|407790|68943|11951|11957|70316|11950|22223|66725|68202|14680|22333|84682|18747|224129|78174|28080|72900|110877|187…	http://www.genome.jp/kegg-bin/show_pathway?mmu05012/mmu:57320%09red/mmu:226646%09red/mmu:73333%09red/mmu:67847%09red/mmu:407785%09red/mmu:66414%09red/mmu:54405%09red/mmu:18747%09red/mmu:22223%09red/mmu:110323%09red/mmu:66576%09red/mmu:13067%09red/mmu:13063%09red/mmu:14763%09red/mmu:18749%09red/mmu:224129%09red/mmu:595136%09red/mmu:11739%09red/mmu:68349%09red/mmu:28080%09red/mmu:20617%09red/mmu:66…
Cardiac muscle contraction	KEGG PATHWAY	mmu04260	72	80	0.000420218	0.000739371	67821|66694|140781|59069|20541|12862|66142|54376|54377|20544|81905|110323|66594|232975|333182|12294|20463|12857|67003|12299|12298|20191|326618|12293|12292|22272|12297|12296|12295|22004|11464|27222|54378|621054|11938|66445|11933|11932|11931|319734|21956|66152|21954|81904|12864|12866|54652|12868|12869|236794|56808|11936|22003|12288|12289|17906|12859|59310|98660|12858|75483|84682|12861|11928|22273|2…	http://www.genome.jp/kegg-bin/show_pathway?mmu04260/mmu:75483%09red/mmu:56808%09red/mmu:12289%09red/mmu:12293%09red/mmu:67003%09red/mmu:232975%09red/mmu:319734%09red/mmu:140723%09red/mmu:20541%09red/mmu:78174%09red/mmu:17897%09red/mmu:17896%09red/mmu:20544%09red/mmu:12858%09red/mmu:22004%09red/mmu:66594%09red/mmu:12862%09red/mmu:110323%09red/mmu:21924%09red/mmu:12296%09red/mmu:12297%09red/mmu:122…
Longevity regulating pathway - multiple species	KEGG PATHWAY	mmu04213	61	64	0.000423735	0.000740869	19082|16333|18707|18706|18176|16337|320207|433759|18709|20480|18710|56717|15511|74769|20656|104111|15376|16370|72508|23797|20655|15182|16334|58988|15512|19079|241113|16000|12359|16001|30955|105787|18708|108079|15482|16653|56484|74370|13688|16367|15461|16369|11515|108097|11651|93759|11793|210044|11513|11512|18747|67605|108099|224129|56458|432530|11652|193740|11514|18749|384783	http://www.genome.jp/kegg-bin/show_pathway?mmu04213/mmu:108099%09red/mmu:18749%09red/mmu:432530%09red/mmu:210044%09red/mmu:224129%09red/mmu:105787%09red/mmu:13688%09red/mmu:241113%09red/mmu:11512%09red/mmu:11513%09red/mmu:384783%09red/mmu:93759%09red/mmu:18708%09red/mmu:18709%09red/mmu:18706%09red/mmu:18707%09red/mmu:16333%09red/mmu:16334%09red/mmu:12359%09red/mmu:56458%09red/mmu:30955%09red/mmu:…
Regulation of lipolysis in adipocytes	KEGG PATHWAY	mmu04923	56	57	0.000439382	0.000763426	16333|18707|18706|14679|16337|14677|18709|18708|109648|12640|74769|14678|16334|16370|23797|30955|103968|16367|19225|320207|67469|16890|19218|18160|18710|22095|11832|19091|19092|224129|11555|11554|18166|11556|16369|66853|11539|11651|14683|11515|210044|23945|11513|11512|18747|18576|19224|225845|104111|22094|432530|11652|11770|11514|18749|384783	http://www.genome.jp/kegg-bin/show_pathway?mmu04923/mmu:18749%09red/mmu:14683%09red/mmu:11555%09red/mmu:210044%09red/mmu:224129%09red/mmu:11512%09red/mmu:11539%09red/mmu:384783%09red/mmu:11515%09red/mmu:18708%09red/mmu:18709%09red/mmu:18706%09red/mmu:18707%09red/mmu:16333%09red/mmu:16334%09red/mmu:16337%09red/mmu:19091%09red/mmu:19092%09red/mmu:18747%09red/mmu:104111%09red/mmu:320207%09red/mmu:10…
Valine, leucine and isoleucine degradation	KEGG PATHWAY	mmu00280	55	56	0.000494159	0.000853268	58875|56752|71872|66948|12036|257633|52538|208982|11669|15108|113868|15107|235674|14204|231086|110821|74147|73988|100470|93747|11364|66885|78894|12035|104776|110446|13382|56357|73724|11409|72039|268782|227095|97212|67041|213043|268860|71724|66904|110460|12039|15356|12040|64059|72535|11992|110695|11671|11761|208715|17850|78038|353371|13171|15360	http://www.genome.jp/kegg-bin/show_pathway?mmu00280/mmu:227095%09red/mmu:12040%09red/mmu:58875%09red/mmu:208715%09red/mmu:15360%09red/mmu:110821%09red/mmu:11761%09red/mmu:71872%09red/mmu:235674%09red/mmu:110446%09red/mmu:78038%09red/mmu:11669%09red/mmu:213043%09red/mmu:66948%09red/mmu:11364%09red/mmu:56752%09red/mmu:257633%09red/mmu:71724%09red/mmu:93747%09red/mmu:104776%09red/mmu:66904%09red/mmu…
Endometrial cancer	KEGG PATHWAY	mmu05213	52	52	0.000528019	0.000906107	12005|18707|18706|18176|320207|18709|18708|18710|18607|56637|26413|74769|26417|109880|11789|22059|12371|17869|16842|12443|12015|30955|13712|26395|26396|110157|15461|16202|19211|23797|11836|13866|14784|16653|17350|56484|12550|13645|20663|20662|13649|21416|21415|21414|12385|12387|12386|23805|12006|11652|11651|216033	http://www.genome.jp/kegg-bin/show_pathway?mmu05213/mmu:320207%09red/mmu:23797%09red/mmu:12550%09red/mmu:12371%09red/mmu:12015%09red/mmu:18708%09red/mmu:18709%09red/mmu:18706%09red/mmu:18707%09red/mmu:12005%09red/mmu:13866%09red/mmu:12387%09red/mmu:26413%09red/mmu:13712%09red/mmu:18176%09red/mmu:11789%09red/mmu:56637%09red/mmu:21416%09red/mmu:21414%09red/mmu:21415%09red/mmu:14784%09red/mmu:11836%…
Starch and sucrose metabolism	KEGG PATHWAY	mmu00500	53	54	0.000625306	0.00106647	232714|110006|94215|232493|22238|22236|74185|22235|243085|18605|394436|70974|212032|216019|112417|14751|68401|110078|77559|11722|109959|552899|394433|216558|58866|14936|72094|100043686|66681|100043684|613123|72157|100043688|16591|14378|231396|15275|15277|14377|100727|209558|14387|103988|94284|67883|394435|394434|71773|394432|69983|394430|19309|76051	http://www.genome.jp/kegg-bin/show_pathway?mmu00500/mmu:112417%09red/mmu:212032%09red/mmu:14751%09red/mmu:11722%09red/mmu:14936%09red/mmu:74185%09red/mmu:243085%09red/mmu:232493%09red/mmu:19309%09red/mmu:110078%09red/mmu:232714%09red/mmu:209558%09red/mmu:100043688%09red/mmu:77559%09red/mmu:18605%09red/mmu:70974%09red/mmu:16591%09red/mmu:110006%09red/mmu:100727%09red/mmu:76051%09red/mmu:67883%09re…
Linoleic acid metabolism	KEGG PATHWAY	mmu00591	50	50	0.000668589	0.00112647	72303|53357|237625|329502|13096|72082|337924|226105|74519|56388|232889|211429|107141|102238433|11687|69836|226143|13109|53973|100041375|69888|13106|66350|26971|26970|18778|78390|665270|230459|13099|13095|100066|13098|13077|271844|13097|26565|404195|13113|13112|13110|225845|433247|13114|18783|18782|18781|18780|242546|18784	http://www.genome.jp/kegg-bin/show_pathway?mmu00591/mmu:13112%09red/mmu:13113%09red/mmu:13110%09red/mmu:53357%09red/mmu:13114%09red/mmu:72303%09red/mmu:404195%09red/mmu:226105%09red/mmu:100066%09red/mmu:237625%09red/mmu:226143%09red/mmu:72082%09red/mmu:13099%09red/mmu:13098%09red/mmu:13097%09red/mmu:13096%09red/mmu:13095%09red/mmu:11687%09red/mmu:56388%09red/mmu:232889%09red/mmu:53973%09red/mmu:1…
Type II diabetes mellitus	KEGG PATHWAY	mmu04930	50	50	0.000668589	0.00112647	18609|18707|18706|20526|16337|20528|18709|18762|18710|56717|26413|74769|16333|26417|26414|16334|26419|16370|212032|21926|30955|12291|12290|320207|18753|18754|18708|16514|18770|20927|378435|12286|12287|16367|15275|15277|216233|16369|12288|12289|26420|216019|103988|12703|18746|12702|67296|16150|11450|384783	http://www.genome.jp/kegg-bin/show_pathway?mmu04930/mmu:212032%09red/mmu:18709%09red/mmu:67296%09red/mmu:384783%09red/mmu:18609%09red/mmu:18708%09red/mmu:18707%09red/mmu:18706%09red/mmu:11450%09red/mmu:18762%09red/mmu:378435%09red/mmu:21926%09red/mmu:16333%09red/mmu:16337%09red/mmu:26417%09red/mmu:18753%09red/mmu:26414%09red/mmu:18746%09red/mmu:12290%09red/mmu:12291%09red/mmu:20528%09red/mmu:3202…
Staphylococcus aureus infection	KEGG PATHWAY	mmu05150	52	53	0.000703556	0.00117824	12262|317677|15894|14130|14131|19204|99571|16415|16414|16661|15002|15001|15000|246256|17194|12259|14293|14294|100504404|50909|50908|12273|16409|18815|211924|14962|14961|14960|14129|14969|17175|17174|15139|20344|20345|12628|17195|16408|13510|16153|12630|225256|14999|11537|12267|12268|16019|12263|12260|14289|12266|14998	http://www.genome.jp/kegg-bin/show_pathway?mmu05150/mmu:14293%09red/mmu:14131%09red/mmu:14130%09red/mmu:16409%09red/mmu:16408%09red/mmu:12273%09red/mmu:14289%09red/mmu:14999%09red/mmu:14998%09red/mmu:50908%09red/mmu:50909%09red/mmu:14294%09red/mmu:12259%09red/mmu:246256%09red/mmu:18815%09red/mmu:12630%09red/mmu:13510%09red/mmu:19204%09red/mmu:11537%09red/mmu:211924%09red/mmu:317677%09red/mmu:1513…
Notch signaling pathway	KEGG PATHWAY	mmu04330	49	49	0.000752516	0.00125269	19208|19719|208117|103806|433759|209200|13544|13542|13543|80904|16450|59287|18131|18132|270118|15205|15182|14534|15208|16848|68318|226548|18222|18223|66354|19664|13388|13389|74198|20602|66935|54485|14357|19668|12914|433586|16449|11491|18129|18128|19164|19165|207521|13016|13017|328572|17305|18519|66340	http://www.genome.jp/kegg-bin/show_pathway?mmu04330/mmu:13017%09red/mmu:13016%09red/mmu:66354%09red/mmu:13543%09red/mmu:13542%09red/mmu:13544%09red/mmu:80904%09red/mmu:68318%09red/mmu:54485%09red/mmu:19208%09red/mmu:270118%09red/mmu:207521%09red/mmu:433759%09red/mmu:16449%09red/mmu:209200%09red/mmu:18131%09red/mmu:18132%09red/mmu:19165%09red/mmu:19164%09red/mmu:66340%09red/mmu:16450%09red/mmu:197…
Ribosome	KEGG PATHWAY	mmu03010	114	148	0.000795869	0.00131697	66163|68611|78523|67025|19951|67681|27367|381438|76808|67281|75398|67994|68537|267019|22186|20042|14109|11837|19946|19944|54127|19943|667759|24030|68436|100042823|20044|66242|27176|19896|65019|68735|121022|66475|57294|67941|66419|67707|67097|20115|20116|100043346|66258|20055|67248|75617|20102|20103|27398|107732|27397|27395|107734|66223|620155|100043813|100503670|76846|56284|666586|56282|269261|68…	http://www.genome.jp/kegg-bin/show_pathway?mmu03010/mmu:107734%09red/mmu:78294%09red/mmu:26451%09red/mmu:56040%09red/mmu:56284%09red/mmu:121022%09red/mmu:319195%09red/mmu:56282%09red/mmu:66163%09red/mmu:68436%09red/mmu:118451%09red/mmu:24030%09red/mmu:68537%09red/mmu:68735%09red/mmu:66475%09red/mmu:69527%09red/mmu:67681%09red/mmu:20102%09red/mmu:267019%09red/mmu:64659%09red/mmu:20103%09red/mmu:75…
Ovarian steroidogenesis	KEGG PATHWAY	mmu04913	55	58	0.000854899	0.00140628	329502|16333|16334|16337|13075|20845|74519|12161|14309|14308|232889|11689|211429|102238433|16866|16867|15496|16000|16001|13109|12155|78390|15493|20778|15486|15485|14566|16835|12640|224129|11515|100066|13070|13074|14683|13076|271844|210044|171210|11513|11512|18747|13078|19225|15497|15490|104111|15492|432530|18783|11514|13110|242546|18749|230459	http://www.genome.jp/kegg-bin/show_pathway?mmu04913/mmu:13110%09red/mmu:16835%09red/mmu:14683%09red/mmu:210044%09red/mmu:171210%09red/mmu:20778%09red/mmu:100066%09red/mmu:12161%09red/mmu:11512%09red/mmu:11513%09red/mmu:11514%09red/mmu:11689%09red/mmu:16333%09red/mmu:16334%09red/mmu:16337%09red/mmu:18747%09red/mmu:14308%09red/mmu:232889%09red/mmu:104111%09red/mmu:18749%09red/mmu:15490%09red/mmu:15…
Glutathione metabolism	KEGG PATHWAY	mmu00480	54	57	0.000961392	0.00157216	14871|14870|14873|14854|75512|69590|14380|71522|20603|20133|14865|14598|66988|14630|332942|110208|23887|14776|14775|68312|14872|103140|14778|14629|382985|20135|66447|20810|110175|207182|14381|68214|14866|14867|14864|14858|14862|14863|14860|67305|14782|14869|14780|54486|66073|269951|15926|18263|16790|14859|56615|76263|625249|211666	http://www.genome.jp/kegg-bin/show_pathway?mmu00480/mmu:20810%09red/mmu:14870%09red/mmu:66988%09red/mmu:14872%09red/mmu:14598%09red/mmu:20133%09red/mmu:66073%09red/mmu:14854%09red/mmu:68214%09red/mmu:14858%09red/mmu:14859%09red/mmu:68312%09red/mmu:207182%09red/mmu:211666%09red/mmu:23887%09red/mmu:54486%09red/mmu:269951%09red/mmu:71522%09red/mmu:20135%09red/mmu:332942%09red/mmu:20603%09red/mmu:147…
Lysine degradation	KEGG PATHWAY	mmu00310	51	53	0.00104547	0.00169965	75410|56752|74729|170442|84505|234135|18193|214162|18293|15107|26432|26433|225888|73251|74147|93747|30956|234407|11669|78920|110446|270076|69188|110460|97212|239122|232811|239017|67956|192195|107823|19193|208043|231051|233904|72535|110695|235386|77683|73582|11671|20937|269132|23923|208266|72947|235626|110147|381022|18822|64707	http://www.genome.jp/kegg-bin/show_pathway?mmu00310/mmu:77683%09red/mmu:232811%09red/mmu:208043%09red/mmu:235386%09red/mmu:234407%09red/mmu:73251%09red/mmu:75410%09red/mmu:20937%09red/mmu:239122%09red/mmu:269132%09red/mmu:110446%09red/mmu:192195%09red/mmu:381022%09red/mmu:110460%09red/mmu:56752%09red/mmu:26433%09red/mmu:72947%09red/mmu:69188%09red/mmu:107823%09red/mmu:170442%09red/mmu:110147%09re…
NOD-like receptor signaling pathway	KEGG PATHWAY	mmu04621	55	59	0.00111085	0.00179544	257632|22034|18033|66513|19200|66824|15519|19697|18036|26416|26417|26414|26415|268973|26419|17948|20293|15516|12370|20310|21926|12675|107607|66724|332579|216799|16193|22027|54483|67955|19094|29857|14825|16151|26409|239319|26420|68652|18035|12362|26413|20304|17952|17940|11797|11796|59079|16173|22051|16176|17951|16150|192656|637515|21929	http://www.genome.jp/kegg-bin/show_pathway?mmu04621/mmu:195046%09red/mmu:22034%09red/mmu:18035%09red/mmu:12370%09red/mmu:21929%09red/mmu:19697%09red/mmu:18036%09red/mmu:12675%09red/mmu:16193%09red/mmu:21926%09red/mmu:66824%09red/mmu:26417%09red/mmu:26416%09red/mmu:26415%09red/mmu:26414%09red/mmu:26413%09red/mmu:19094%09red/mmu:268973%09red/mmu:19200%09red/mmu:68652%09red/mmu:239319%09red/mmu:1803…
Amino sugar and nucleotide sugar metabolism	KEGG PATHWAY	mmu00520	48	49	0.00112929	0.0018147	50798|22235|71884|67311|74246|266690|14635|212032|54342|227620|69080|14430|216019|14751|234730|19703|72017|109785|216558|94181|320635|29858|75540|66681|110119|72157|56174|67980|15212|109754|15275|15277|22122|14584|54128|14583|331026|74091|15211|12763|103988|107652|218138|12764|67883|26384|230582|245847	http://www.genome.jp/kegg-bin/show_pathway?mmu00520/mmu:50798%09red/mmu:74246%09red/mmu:14751%09red/mmu:109785%09red/mmu:94181%09red/mmu:14583%09red/mmu:14584%09red/mmu:74091%09red/mmu:26384%09red/mmu:67311%09red/mmu:320635%09red/mmu:19703%09red/mmu:212032%09red/mmu:69080%09red/mmu:67980%09red/mmu:245847%09red/mmu:14430%09red/mmu:15212%09red/mmu:15211%09red/mmu:14635%09red/mmu:67883%09red/mmu:216…
Carbohydrate digestion and absorption	KEGG PATHWAY	mmu04973	45	45	0.00120974	0.0019328	67821|18707|18706|20526|232714|320207|18709|18708|14385|74769|242851|212032|23797|18796|226413|30955|68401|14377|18751|27222|109959|15277|11722|83770|83771|11933|11932|11931|20537|232975|100043686|100043684|100043688|18710|56485|14378|15275|11936|12289|98660|11928|216019|69983|11652|11651	http://www.genome.jp/kegg-bin/show_pathway?mmu04973/mmu:11722%09red/mmu:212032%09red/mmu:18708%09red/mmu:14378%09red/mmu:23797%09red/mmu:242851%09red/mmu:232975%09red/mmu:232714%09red/mmu:18709%09red/mmu:18706%09red/mmu:18707%09red/mmu:100043688%09red/mmu:67821%09red/mmu:30955%09red/mmu:27222%09red/mmu:20526%09red/mmu:320207%09red/mmu:11928%09red/mmu:216019%09red/mmu:14385%09red/mmu:98660%09red/m…
Drug metabolism - other enzymes	KEGG PATHWAY	mmu00983	49	51	0.00132439	0.00210388	15452|229363|94215|22238|102022|22236|112417|243085|110006|21877|394436|16434|22017|13897|103149|234671|23917|17962|17960|17961|613123|234673|552899|71773|22245|231396|68556|22436|72094|72269|72361|22247|80914|23918|436059|99586|13884|100727|57813|104158|94284|72962|394435|394434|394433|394432|234669|394430|64705	http://www.genome.jp/kegg-bin/show_pathway?mmu00983/mmu:112417%09red/mmu:23917%09red/mmu:22017%09red/mmu:234669%09red/mmu:13884%09red/mmu:23918%09red/mmu:72269%09red/mmu:94284%09red/mmu:436059%09red/mmu:234671%09red/mmu:99586%09red/mmu:22247%09red/mmu:22245%09red/mmu:72962%09red/mmu:110006%09red/mmu:104158%09red/mmu:68556%09red/mmu:100727%09red/mmu:243085%09red/mmu:229363%09red/mmu:234673%09red/m…
Hedgehog signaling pathway	KEGG PATHWAY	mmu04340	44	44	0.00136282	0.00215264	109689|320129|14451|26965|70425|19207|19206|216869|16568|20423|14633|14632|13363|14634|24069|12444|12443|214897|15245|103583|26554|12234|93687|16147|110355|20747|66313|319757|117606|76857|12043|56637|16576|27373|103236|57810|59056|14725|18747|104318|68525|75788|240888|18749	http://www.genome.jp/kegg-bin/show_pathway?mmu04340/mmu:12234%09red/mmu:18749%09red/mmu:15245%09red/mmu:16568%09red/mmu:319757%09red/mmu:109689%09red/mmu:70425%09red/mmu:104318%09red/mmu:20423%09red/mmu:26554%09red/mmu:56637%09red/mmu:103583%09red/mmu:76857%09red/mmu:18747%09red/mmu:75788%09red/mmu:19206%09red/mmu:19207%09red/mmu:12043%09red/mmu:26965%09red/mmu:59056%09red/mmu:16147%09red/mmu:146…
Oxidative phosphorylation	KEGG PATHWAY	mmu00190	106	139	0.00148853	0.00233791	67273|76429|110323|11984|227197|66377|66152|67264|69802|68775|17992|17995|17993|407785|17991|140494|68194|22272|22273|66576|67942|66144|66414|66142|12859|12858|225887|66495|69875|27060|333182|12857|12856|66091|78330|407790|11958|11951|11957|70316|11950|27425|12868|70383|54411|84682|67130|28080|72900|226139|66945|66046|66043|11949|11946|11947|11944|11945|338375|108664|67003|66335|595136|68375|6789…	http://www.genome.jp/kegg-bin/show_pathway?mmu00190/mmu:226646%09red/mmu:407785%09red/mmu:69802%09red/mmu:66414%09red/mmu:110323%09red/mmu:66576%09red/mmu:595136%09red/mmu:11984%09red/mmu:110935%09red/mmu:68349%09red/mmu:28080%09red/mmu:66377%09red/mmu:67273%09red/mmu:76252%09red/mmu:66594%09red/mmu:17995%09red/mmu:17992%09red/mmu:17993%09red/mmu:17991%09red/mmu:66290%09red/mmu:20463%09red/mmu:78…
ABC transporters	KEGG PATHWAY	mmu02010	45	46	0.00161336	0.00251974	21354|217258|56325|224814|74104|26357|18669|12638|11303|11304|11305|11306|21355|11666|27410|27413|19299|27416|192663|56199|17250|11307|239273|18671|20928|244562|217262|20927|26874|217265|74610|76184|381072|27409|27421|27403|77706|268379|27404|27405|19300|74591|67470|76408|12780	http://www.genome.jp/kegg-bin/show_pathway?mmu02010/mmu:19299%09red/mmu:27410%09red/mmu:17250%09red/mmu:27413%09red/mmu:27416%09red/mmu:11666%09red/mmu:11307%09red/mmu:192663%09red/mmu:239273%09red/mmu:67470%09red/mmu:244562%09red/mmu:224814%09red/mmu:21354%09red/mmu:12638%09red/mmu:11303%09red/mmu:11305%09red/mmu:11304%09red/mmu:74610%09red/mmu:11306%09red/mmu:21355%09red/mmu:19300%09red/mmu:563…
N-Glycan biosynthesis	KEGG PATHWAY	mmu00510	47	49	0.00167884	0.00257855	67569|20440|208624|102580|103963|68292|16430|20014|320302|14595|381903|13200|208211|13478|240119|140481|57377|67555|269181|223774|57370|13481|13480|207958|217664|53618|67574|66789|17156|17155|17158|14376|53418|380959|268510|66248|230815|320438|107895|13135|57170|227619|103534|56737|17308|17309|227697	http://www.genome.jp/kegg-bin/show_pathway?mmu00510/mmu:208211%09red/mmu:227619%09red/mmu:268510%09red/mmu:13200%09red/mmu:227697%09red/mmu:102580%09red/mmu:230815%09red/mmu:53418%09red/mmu:107895%09red/mmu:53618%09red/mmu:20440%09red/mmu:320302%09red/mmu:68292%09red/mmu:17155%09red/mmu:381903%09red/mmu:223774%09red/mmu:56737%09red/mmu:20014%09red/mmu:320438%09red/mmu:57170%09red/mmu:17158%09red/…
Cocaine addiction	KEGG PATHWAY	mmu05030	47	49	0.00167884	0.00257855	16476|108069|108068|19739|14679|14678|14677|21823|19697|208647|18033|17161|11911|12569|18747|208677|12568|14800|13488|13385|13162|78284|109731|231991|18610|12912|12913|12915|67839|224129|26427|13489|12064|14683|19049|214084|13195|14282|242443|14814|14813|14812|14811|14810|110877|11909|18749	http://www.genome.jp/kegg-bin/show_pathway?mmu05030/mmu:18033%09red/mmu:17161%09red/mmu:14683%09red/mmu:14814%09red/mmu:224129%09red/mmu:14812%09red/mmu:14813%09red/mmu:14810%09red/mmu:14811%09red/mmu:12064%09red/mmu:208677%09red/mmu:19697%09red/mmu:242443%09red/mmu:108068%09red/mmu:108069%09red/mmu:21823%09red/mmu:13195%09red/mmu:19739%09red/mmu:18749%09red/mmu:13162%09red/mmu:11909%09red/mmu:16…
Cysteine and methionine metabolism	KEGG PATHWAY	mmu00270	47	49	0.00167884	0.00257855	22117|231691|108645|232087|14854|66902|12583|16828|257635|14718|14719|14630|14204|73988|100470|74340|12036|12035|13435|11720|20810|268782|64918|11702|20603|229709|17449|17448|14629|107869|67873|238505|16833|16832|106557|13433|104923|13436|67870|269378|12116|12411|246221|329008|234724|11615|56369	http://www.genome.jp/kegg-bin/show_pathway?mmu00270/mmu:14719%09red/mmu:14718%09red/mmu:11720%09red/mmu:17448%09red/mmu:17449%09red/mmu:20810%09red/mmu:22117%09red/mmu:11702%09red/mmu:56369%09red/mmu:234724%09red/mmu:14854%09red/mmu:66902%09red/mmu:12411%09red/mmu:238505%09red/mmu:229709%09red/mmu:13433%09red/mmu:16832%09red/mmu:16833%09red/mmu:20603%09red/mmu:231691%09red/mmu:14204%09red/mmu:246…
Fanconi anemia pathway	KEGG PATHWAY	mmu03460	48	51	0.00195023	0.00296265	100040608|71711|19361|13870|67196|67561|71718|19714|52864|75764|12190|80905|74386|101831|15205|211651|223970|208836|268465|245000|68275|20892|104806|21975|21976|56210|17350|237911|233826|69928|12189|14087|14088|60534|18861|114714|27015|26447|272158|71885|67030|72775|193838|19891|12144|50505|230484|235610	http://www.genome.jp/kegg-bin/show_pathway?mmu03460/mmu:12144%09red/mmu:268465%09red/mmu:19891%09red/mmu:80905%09red/mmu:237911%09red/mmu:235610%09red/mmu:223970%09red/mmu:20892%09red/mmu:69928%09red/mmu:19361%09red/mmu:68275%09red/mmu:14088%09red/mmu:14087%09red/mmu:67196%09red/mmu:245000%09red/mmu:19714%09red/mmu:67561%09red/mmu:114714%09red/mmu:12190%09red/mmu:272158%09red/mmu:50505%09red/mmu:…
Arginine and proline metabolism	KEGG PATHWAY	mmu00330	48	51	0.00195023	0.00296265	67432|56752|242669|17161|18452|18451|67092|20603|76507|66988|12716|12715|14718|14719|75986|332942|107239|13142|14431|66194|11669|18242|209027|20810|228608|18263|11702|66054|109731|11847|18127|56189|18125|56454|12709|72535|110695|11671|212647|20229|19125|338403|320452|69051|69215|11846|76722|18126	http://www.genome.jp/kegg-bin/show_pathway?mmu00330/mmu:14719%09red/mmu:14718%09red/mmu:17161%09red/mmu:20810%09red/mmu:66988%09red/mmu:11846%09red/mmu:75986%09red/mmu:66194%09red/mmu:11702%09red/mmu:67432%09red/mmu:20603%09red/mmu:107239%09red/mmu:11669%09red/mmu:69215%09red/mmu:18127%09red/mmu:12716%09red/mmu:12715%09red/mmu:56454%09red/mmu:18263%09red/mmu:76507%09red/mmu:13142%09red/mmu:332942…
Systemic lupus erythematosus	KEGG PATHWAY	mmu05322	111	149	0.00202483	0.00305926	109828|317677|12487|319172|547160|12524|69389|20641|69382|12279|404634|100504404|12274|77605|60595|14998|14999|12268|11472|12262|12263|12260|12266|97114|319192|69379|97908|230558|232440|11474|12259|14129|68231|320332|15139|109711|385328|26914|15270|12519|20821|21926|20823|20822|319188|110382|69386|319184|319186|16153|319180|319181|319182|319183|20638|21947|319158|15081|665433|319166|319167|319164…	http://www.genome.jp/kegg-bin/show_pathway?mmu05322/mmu:12279%09red/mmu:14129%09red/mmu:60595%09red/mmu:21947%09red/mmu:14812%09red/mmu:15267%09red/mmu:14811%09red/mmu:319188%09red/mmu:12519%09red/mmu:14999%09red/mmu:14998%09red/mmu:50908%09red/mmu:50909%09red/mmu:319190%09red/mmu:319178%09red/mmu:11474%09red/mmu:68231%09red/mmu:11472%09red/mmu:15978%09red/mmu:15000%09red/mmu:12259%09red/mmu:6937…
Tryptophan metabolism	KEGG PATHWAY	mmu00380	45	47	0.0021297	0.00320031	70266|110695|56752|71872|76507|107626|15930|18293|17161|15107|14204|21743|21990|107766|74147|73988|100470|93747|11669|110446|12359|270076|23923|56720|216343|97212|213043|239017|109731|71724|110460|266645|98256|229905|72535|70789|11671|11761|209176|13076|13077|13078|13195|71562|11298	http://www.genome.jp/kegg-bin/show_pathway?mmu00380/mmu:70266%09red/mmu:17161%09red/mmu:11761%09red/mmu:71872%09red/mmu:15930%09red/mmu:11669%09red/mmu:213043%09red/mmu:12359%09red/mmu:13195%09red/mmu:56752%09red/mmu:71724%09red/mmu:270076%09red/mmu:107626%09red/mmu:76507%09red/mmu:110695%09red/mmu:72535%09red/mmu:97212%09red/mmu:209176%09red/mmu:100470%09red/mmu:71562%09red/mmu:18293%09red/mmu:2…
Vasopressin-regulated water reabsorption	KEGG PATHWAY	mmu04962	42	43	0.00230908	0.00345121	11829|11828|19344|19345|11827|18195|19326|14570|22428|59288|13427|13426|13424|235661|69654|192662|213575|68097|11857|110350|231991|12912|12913|20909|26427|208677|14683|271457|13191|12000|11512|18747|11515|78284|18749|67665|56455|22318|53869|234663|104111|208647	http://www.genome.jp/kegg-bin/show_pathway?mmu04962/mmu:13426%09red/mmu:13427%09red/mmu:13424%09red/mmu:271457%09red/mmu:208647%09red/mmu:11827%09red/mmu:14683%09red/mmu:11829%09red/mmu:20909%09red/mmu:11512%09red/mmu:234663%09red/mmu:11515%09red/mmu:192662%09red/mmu:12000%09red/mmu:13191%09red/mmu:18747%09red/mmu:22428%09red/mmu:19345%09red/mmu:19344%09red/mmu:18749%09red/mmu:56455%09red/mmu:193…
Mineral absorption	KEGG PATHWAY	mmu04978	44	46	0.00239938	0.003567	67821|18173|18174|20529|14325|20541|73649|15368|15369|15203|320718|20537|171429|58800|27222|64177|11936|225997|11932|11931|72027|74051|232975|20531|22782|11977|70358|52466|22041|14319|67972|98660|12724|74338|105243|11933|634386|11928|71775|13487|22337|53945|12309|11927	http://www.genome.jp/kegg-bin/show_pathway?mmu04978/mmu:22337%09red/mmu:11977%09red/mmu:15369%09red/mmu:15368%09red/mmu:52466%09red/mmu:232975%09red/mmu:20541%09red/mmu:70358%09red/mmu:72027%09red/mmu:67821%09red/mmu:14325%09red/mmu:27222%09red/mmu:20529%09red/mmu:18174%09red/mmu:320718%09red/mmu:20537%09red/mmu:171429%09red/mmu:18173%09red/mmu:225997%09red/mmu:105243%09red/mmu:73649%09red/mmu:11…
Endocrine and other factor-regulated calcium reabsorption	KEGG PATHWAY	mmu04961	49	54	0.00288853	0.00427134	67821|18050|103967|16613|18795|13429|20541|16624|18747|18796|18797|74325|12757|18798|18750|18751|18752|27222|11936|11933|11932|11931|67972|232975|232910|67300|13646|22337|16618|13430|98660|12062|16617|11773|194352|14682|14683|16591|11515|13982|11512|11928|12307|71770|11771|53869|11772|18749|19228	http://www.genome.jp/kegg-bin/show_pathway?mmu04961/mmu:22337%09red/mmu:18798%09red/mmu:14683%09red/mmu:14682%09red/mmu:74325%09red/mmu:18747%09red/mmu:232975%09red/mmu:20541%09red/mmu:13982%09red/mmu:11515%09red/mmu:12062%09red/mmu:12757%09red/mmu:98660%09red/mmu:67821%09red/mmu:194352%09red/mmu:18749%09red/mmu:16591%09red/mmu:18050%09red/mmu:67300%09red/mmu:11928%09red/mmu:16624%09red/mmu:19228…
Basal transcription factors	KEGG PATHWAY	mmu03022	42	44	0.00304742	0.00448245	23894|13871|13872|66671|72504|74197|63856|24074|21374|68705|108143|99730|14884|14885|14886|237336|209361|66467|226182|319944|619332|227606|21343|71828|70439|68153|209357|228980|74469|229906|17420|66464|407786|68776|12572|235459|24075|225895|102162|83602|270627|57080	http://www.genome.jp/kegg-bin/show_pathway?mmu03022/mmu:228980%09red/mmu:12572%09red/mmu:237336%09red/mmu:108143%09red/mmu:83602%09red/mmu:17420%09red/mmu:619332%09red/mmu:63856%09red/mmu:225895%09red/mmu:226182%09red/mmu:66671%09red/mmu:68776%09red/mmu:21374%09red/mmu:209361%09red/mmu:24075%09red/mmu:24074%09red/mmu:74469%09red/mmu:102162%09red/mmu:270627%09red/mmu:319944%09red/mmu:227606%09red/…
Nicotine addiction	KEGG PATHWAY	mmu05033	39	40	0.00331166	0.00482012	14799|110886|72961|14397|216643|53623|14800|22348|14396|14394|14395|14802|11440|11444|14399|14812|57249|140919|12286|12287|14408|14409|11441|14404|14405|14406|14407|14400|14401|14402|14403|242443|11438|14814|14813|328699|14811|14810|216227	http://www.genome.jp/kegg-bin/show_pathway?mmu05033/mmu:14401%09red/mmu:14394%09red/mmu:14403%09red/mmu:14396%09red/mmu:14405%09red/mmu:14404%09red/mmu:14407%09red/mmu:140919%09red/mmu:14409%09red/mmu:14408%09red/mmu:14814%09red/mmu:14812%09red/mmu:14397%09red/mmu:14810%09red/mmu:14811%09red/mmu:11438%09red/mmu:242443%09red/mmu:11441%09red/mmu:216227%09red/mmu:14406%09red/mmu:72961%09red/mmu:1439…
Aldosterone-regulated sodium reabsorption	KEGG PATHWAY	mmu04960	39	40	0.00331166	0.00482012	67821|16333|18707|18706|16337|320207|18709|18708|18607|26413|74769|26417|20276|20277|20278|16334|56379|30955|110784|18752|83814|18750|18751|16000|27222|65962|11936|11933|11932|11931|232975|18710|15484|16367|108017|55948|98660|11928|20393	http://www.genome.jp/kegg-bin/show_pathway?mmu04960/mmu:11936%09red/mmu:20276%09red/mmu:18709%09red/mmu:83814%09red/mmu:232975%09red/mmu:18708%09red/mmu:55948%09red/mmu:18706%09red/mmu:18707%09red/mmu:16333%09red/mmu:16334%09red/mmu:16337%09red/mmu:26417%09red/mmu:30955%09red/mmu:26413%09red/mmu:27222%09red/mmu:20277%09red/mmu:320207%09red/mmu:11928%09red/mmu:67821%09red/mmu:98660%09red/mmu:20393…
Pentose and glucuronate interconversions	KEGG PATHWAY	mmu00040	36	36	0.00356438	0.00516092	110006|94215|22238|22236|112417|22235|243085|94284|67861|394435|11669|552899|394433|216558|72094|613123|71755|394430|66646|16591|72535|11997|11671|100727|20322|68631|11677|14187|102448|394436|67880|394434|71773|394432|231396|58810	http://www.genome.jp/kegg-bin/show_pathway?mmu00040/mmu:112417%09red/mmu:11997%09red/mmu:58810%09red/mmu:94284%09red/mmu:102448%09red/mmu:11669%09red/mmu:67861%09red/mmu:14187%09red/mmu:68631%09red/mmu:16591%09red/mmu:110006%09red/mmu:100727%09red/mmu:243085%09red/mmu:67880%09red/mmu:231396%09red/mmu:72094%09red/mmu:72535%09red/mmu:11671%09red/mmu:71755%09red/mmu:11677%09red/mmu:66646%09red/mmu:7…
Antigen processing and presentation	KEGG PATHWAY	mmu04612	77	98	0.0036016	0.00516393	110557|19727|21354|15001|21356|16641|16642|16643|19186|58179|14972|15024|15007|15006|15002|224761|15000|15511|15512|19192|15516|15043|15042|15040|14985|245615|12010|12317|53970|16149|100504404|14828|13040|21355|12330|12504|15978|14963|12525|14961|14960|18044|15525|18046|14964|15482|14969|12265|667977|14827|15013|15015|13039|15018|245616|18045|110696|15519|14990|14991|12912|14997|15039|14998|14999…	http://www.genome.jp/kegg-bin/show_pathway?mmu04612/mmu:58179%09red/mmu:13030%09red/mmu:12317%09red/mmu:14964%09red/mmu:193740%09red/mmu:13039%09red/mmu:19727%09red/mmu:100529082%09red/mmu:224753%09red/mmu:14999%09red/mmu:14998%09red/mmu:14991%09red/mmu:14990%09red/mmu:21926%09red/mmu:15006%09red/mmu:15978%09red/mmu:15042%09red/mmu:15018%09red/mmu:14828%09red/mmu:53970%09red/mmu:14997%09red/mmu:1…
Fatty acid degradation	KEGG PATHWAY	mmu00071	45	49	0.00360361	0.00516393	78625|56752|12895|12894|12896|666168|74205|52538|11409|11522|113868|15107|11529|231086|74147|93747|11364|66885|11363|11669|50790|110446|270076|433256|97212|94180|277753|110460|26876|14081|80911|328845|216739|110695|13119|11671|72535|11532|235674|78070|13117|100134861|11430|13118|13177	http://www.genome.jp/kegg-bin/show_pathway?mmu00071/mmu:666168%09red/mmu:12895%09red/mmu:12896%09red/mmu:328845%09red/mmu:50790%09red/mmu:13118%09red/mmu:11430%09red/mmu:74205%09red/mmu:78070%09red/mmu:216739%09red/mmu:235674%09red/mmu:277753%09red/mmu:11532%09red/mmu:12894%09red/mmu:11669%09red/mmu:13117%09red/mmu:56752%09red/mmu:78625%09red/mmu:433256%09red/mmu:270076%09red/mmu:14081%09red/mmu:…
Pyruvate metabolism	KEGG PATHWAY	mmu00620	38	39	0.00373655	0.00532698	14651|60525|17436|68977|74551|109801|18598|11669|16828|56752|18597|75572|14194|18563|110446|235339|13382|110460|107476|17449|17448|18770|76238|52815|16832|106557|72535|107029|110695|11671|109264|74156|68263|18746|68738|16833|18534|100705	http://www.genome.jp/kegg-bin/show_pathway?mmu00620/mmu:107476%09red/mmu:17448%09red/mmu:17449%09red/mmu:14651%09red/mmu:109264%09red/mmu:11669%09red/mmu:56752%09red/mmu:18746%09red/mmu:60525%09red/mmu:76238%09red/mmu:74156%09red/mmu:16832%09red/mmu:16833%09red/mmu:109801%09red/mmu:110695%09red/mmu:68738%09red/mmu:18563%09red/mmu:110460%09red/mmu:100705%09red/mmu:13382%09red/mmu:11671%09red/mmu:7…
Fructose and mannose metabolism	KEGG PATHWAY	mmu00051	35	35	0.00402439	0.00566518	18642|18640|18641|353204|16548|67861|212032|230163|69080|56421|234730|18639|225913|29858|75540|110119|14121|14120|21991|15275|15277|22122|11674|54128|270198|11997|331026|170768|20322|11676|11677|218138|14187|216019|319801	http://www.genome.jp/kegg-bin/show_pathway?mmu00051/mmu:16548%09red/mmu:212032%09red/mmu:11997%09red/mmu:18642%09red/mmu:18641%09red/mmu:18640%09red/mmu:67861%09red/mmu:15277%09red/mmu:353204%09red/mmu:14187%09red/mmu:21991%09red/mmu:14121%09red/mmu:69080%09red/mmu:230163%09red/mmu:216019%09red/mmu:218138%09red/mmu:75540%09red/mmu:14120%09red/mmu:319801%09red/mmu:331026%09red/mmu:15275%09red/mmu:…
Nicotinate and nicotinamide metabolism	KEGG PATHWAY	mmu00760	35	35	0.00402439	0.00566518	78914|71872|67375|107569|18605|230718|18113|18115|23959|11871|18950|192185|68646|59027|11872|667034|103850|67993|11761|50773|69564|213043|12494|71724|68106|12182|209558|74080|70881|76952|223646|66763|66454|225994|226518	http://www.genome.jp/kegg-bin/show_pathway?mmu00760/mmu:23959%09red/mmu:12494%09red/mmu:67375%09red/mmu:103850%09red/mmu:18950%09red/mmu:11761%09red/mmu:71872%09red/mmu:213043%09red/mmu:223646%09red/mmu:18605%09red/mmu:71724%09red/mmu:68106%09red/mmu:225994%09red/mmu:18115%09red/mmu:107569%09red/mmu:69564%09red/mmu:18113%09red/mmu:11872%09red/mmu:11871%09red/mmu:66454%09red/mmu:76952%09red/mmu:74…
RIG-I-like receptor signaling pathway	KEGG PATHWAY	mmu04622	58	69	0.00403492	0.00566518	22030|22031|54644|21353|22034|18033|80861|100038882|71609|15945|18035|19697|217069|26416|26414|26415|71586|26419|54131|12370|13205|21926|12675|270151|16160|15974|19766|110957|225913|242519|56489|67664|387510|56480|29857|26401|74256|14082|23988|72512|26409|66641|26420|54123|73174|19094|230073|11793|230396|230405|16159|18036|15965|27215|67526|16150|16151|228607	http://www.genome.jp/kegg-bin/show_pathway?mmu04622/mmu:217069%09red/mmu:22031%09red/mmu:22030%09red/mmu:71609%09red/mmu:22034%09red/mmu:242519%09red/mmu:80861%09red/mmu:12370%09red/mmu:15974%09red/mmu:225913%09red/mmu:19697%09red/mmu:18036%09red/mmu:54644%09red/mmu:12675%09red/mmu:71586%09red/mmu:21926%09red/mmu:73174%09red/mmu:26416%09red/mmu:26415%09red/mmu:26414%09red/mmu:19094%09red/mmu:2398…
Glycine, serine and threonine metabolism	KEGG PATHWAY	mmu00260	39	41	0.00436942	0.00607349	231691|237940|67092|18648|20425|257635|17161|107272|68133|74129|13142|27364|14431|12116|110695|192166|218865|13382|434437|100678|58865|109731|19193|76238|107869|329008|26912|12183|108037|11754|236539|12411|268782|235582|71776|11611|11656|104174|11655	http://www.genome.jp/kegg-bin/show_pathway?mmu00260/mmu:17161%09red/mmu:100678%09red/mmu:20425%09red/mmu:218865%09red/mmu:27364%09red/mmu:18648%09red/mmu:12411%09red/mmu:236539%09red/mmu:107869%09red/mmu:235582%09red/mmu:76238%09red/mmu:110695%09red/mmu:231691%09red/mmu:14431%09red/mmu:237940%09red/mmu:104174%09red/mmu:13142%09red/mmu:11611%09red/mmu:13382%09red/mmu:67092%09red/mmu:434437%09red/m…
Bladder cancer	KEGG PATHWAY	mmu05219	39	41	0.00436942	0.00607349	26396|18176|21825|26413|20779|26417|109880|22059|17869|13143|13144|15200|12567|26395|83995|19645|110157|242705|11836|13866|16653|69635|12550|13645|15461|17390|17395|13649|12443|12578|13557|14184|13555|12575|72962|22270|22339|17246|56289	http://www.genome.jp/kegg-bin/show_pathway?mmu05219/mmu:12575%09red/mmu:12578%09red/mmu:12550%09red/mmu:22339%09red/mmu:56289%09red/mmu:21825%09red/mmu:14184%09red/mmu:26413%09red/mmu:18176%09red/mmu:72962%09red/mmu:22059%09red/mmu:69635%09red/mmu:11836%09red/mmu:13144%09red/mmu:13143%09red/mmu:13866%09red/mmu:12567%09red/mmu:109880%09red/mmu:17246%09red/mmu:13557%09red/mmu:13555%09red/mmu:242705…
Viral myocarditis	KEGG PATHWAY	mmu05416	75	96	0.00443265	0.00613074	18646|110557|672195|11350|15894|12487|140781|21947|14972|15007|208643|24053|13138|13405|15002|224761|15000|14360|20391|15043|12524|13690|15040|13063|12443|13052|12370|170758|14964|15024|14997|11465|11461|12371|100504404|21939|230861|19353|13067|14961|14960|19354|14969|16773|667977|24051|24052|15013|15015|15018|14985|15006|16408|110696|12367|16415|14990|14991|12389|12519|15039|11352|14998|14999|16…	http://www.genome.jp/kegg-bin/show_pathway?mmu05416/mmu:16773%09red/mmu:16408%09red/mmu:12443%09red/mmu:21947%09red/mmu:100529082%09red/mmu:224753%09red/mmu:12371%09red/mmu:12370%09red/mmu:14999%09red/mmu:14998%09red/mmu:18646%09red/mmu:12519%09red/mmu:16414%09red/mmu:14991%09red/mmu:14990%09red/mmu:14997%09red/mmu:13690%09red/mmu:13138%09red/mmu:12122%09red/mmu:15018%09red/mmu:13052%09red/mmu:15…
Intestinal immune network for IgA production	KEGG PATHWAY	mmu04672	41	44	0.00448515	0.00617264	18703|21947|12487|12767|17123|56838|15002|15001|15000|17000|16191|16193|12524|16168|20315|12777|21935|100504404|16169|21939|11628|69583|53859|54167|14961|14960|14969|24099|16183|16401|12519|12769|57916|14998|14999|20300|50723|21803|16019|16153|72049	http://www.genome.jp/kegg-bin/show_pathway?mmu04672/mmu:11628%09red/mmu:21947%09red/mmu:16401%09red/mmu:16191%09red/mmu:14999%09red/mmu:14998%09red/mmu:24099%09red/mmu:16193%09red/mmu:12519%09red/mmu:21803%09red/mmu:15001%09red/mmu:72049%09red/mmu:18703%09red/mmu:12777%09red/mmu:69583%09red/mmu:50723%09red/mmu:20315%09red/mmu:16168%09red/mmu:16169%09red/mmu:53859%09red/mmu:56838%09red/mmu:12487%0…
Prion diseases	KEGG PATHWAY	mmu05020	34	34	0.00454521	0.00622447	109828|20867|69379|26413|13653|26417|14360|230558|20655|16193|26395|17968|17967|13712|12259|12279|26396|12274|14828|15139|18128|12028|193740|12364|20304|19122|18747|16176|110382|16175|12262|12260|18749|226519	http://www.genome.jp/kegg-bin/show_pathway?mmu05020/mmu:12279%09red/mmu:12274%09red/mmu:12028%09red/mmu:16193%09red/mmu:12259%09red/mmu:26417%09red/mmu:109828%09red/mmu:26413%09red/mmu:18747%09red/mmu:69379%09red/mmu:14360%09red/mmu:13712%09red/mmu:18749%09red/mmu:19122%09red/mmu:13653%09red/mmu:20867%09red/mmu:110382%09red/mmu:15139%09red/mmu:16176%09red/mmu:193740%09red/mmu:14828%09red/mmu:1226…
Malaria	KEGG PATHWAY	mmu05144	45	50	0.00462218	0.00629886	21828|15894|16159|15122|21826|21947|21825|16415|16414|12985|24088|71683|13349|20293|16193|16176|12520|21898|20339|22329|110257|20969|15978|12491|15529|18613|21926|21827|17874|20344|100503605|21939|16635|17295|16408|12845|15234|16971|81897|16173|21803|14934|21808|21809|16153	http://www.genome.jp/kegg-bin/show_pathway?mmu05144/mmu:12491%09red/mmu:16408%09red/mmu:14934%09red/mmu:21947%09red/mmu:21825%09red/mmu:21809%09red/mmu:21808%09red/mmu:21828%09red/mmu:21827%09red/mmu:21826%09red/mmu:21803%09red/mmu:21926%09red/mmu:16193%09red/mmu:15978%09red/mmu:81897%09red/mmu:20339%09red/mmu:12845%09red/mmu:110257%09red/mmu:15529%09red/mmu:71683%09red/mmu:16414%09red/mmu:17874%…
Tyrosine metabolism	KEGG PATHWAY	mmu00350	38	40	0.00492952	0.00665246	14874|237940|11522|71872|21823|22018|67689|22173|17161|14718|14719|11529|14204|109731|73988|100470|22178|73458|11761|13166|15445|213043|56847|71724|26876|17319|14085|12846|11670|68636|11754|11532|13190|13195|15233|234724|18948|621603	http://www.genome.jp/kegg-bin/show_pathway?mmu00350/mmu:14719%09red/mmu:14718%09red/mmu:15445%09red/mmu:17161%09red/mmu:22018%09red/mmu:17319%09red/mmu:14874%09red/mmu:234724%09red/mmu:11761%09red/mmu:71872%09red/mmu:11532%09red/mmu:13190%09red/mmu:21823%09red/mmu:13195%09red/mmu:12846%09red/mmu:14085%09red/mmu:213043%09red/mmu:14204%09red/mmu:13166%09red/mmu:100470%09red/mmu:237940%09red/mmu:686…
Fat digestion and absorption	KEGG PATHWAY	mmu04975	38	40	0.00492952	0.00665246	26971|237625|238055|11808|14079|20778|14719|55979|11303|12613|67800|19012|237636|109791|67512|66350|17777|26970|18778|110460|12491|67717|69060|13350|26569|67916|233549|27409|18947|18946|26565|69836|50784|67470|18782|18781|18780|18784	http://www.genome.jp/kegg-bin/show_pathway?mmu04975/mmu:14719%09red/mmu:11808%09red/mmu:67512%09red/mmu:12491%09red/mmu:14079%09red/mmu:237625%09red/mmu:67717%09red/mmu:67470%09red/mmu:233549%09red/mmu:69060%09red/mmu:12613%09red/mmu:11303%09red/mmu:18784%09red/mmu:18782%09red/mmu:18780%09red/mmu:18781%09red/mmu:19012%09red/mmu:69836%09red/mmu:238055%09red/mmu:18946%09red/mmu:18947%09red/mmu:1097…
Galactose metabolism	KEGG PATHWAY	mmu00052	32	32	0.00580371	0.00779436	232714|18642|18641|14387|74246|14595|67861|14635|212032|14430|226413|56421|68401|11605|12091|53418|216558|66681|16770|72157|14378|15275|15277|14377|11997|11677|103988|14187|216019|319625|69983|76051	http://www.genome.jp/kegg-bin/show_pathway?mmu00052/mmu:16770%09red/mmu:74246%09red/mmu:11605%09red/mmu:11997%09red/mmu:18642%09red/mmu:18641%09red/mmu:212032%09red/mmu:232714%09red/mmu:76051%09red/mmu:53418%09red/mmu:67861%09red/mmu:14187%09red/mmu:14430%09red/mmu:12091%09red/mmu:14635%09red/mmu:216019%09red/mmu:14387%09red/mmu:15275%09red/mmu:103988%09red/mmu:66681%09red/mmu:72157%09red/mmu:152…
Porphyrin and chlorophyll metabolism	KEGG PATHWAY	mmu00860	38	41	0.006429	0.0085926	110006|94215|22238|12870|22236|107508|112417|243085|12892|15288|77697|394433|14151|15368|15369|15203|233016|15159|14297|552899|71773|72094|613123|394430|226139|109778|70383|100727|94284|394436|394435|394434|22276|394432|231396|22275|11656|11655	http://www.genome.jp/kegg-bin/show_pathway?mmu00860/mmu:112417%09red/mmu:12892%09red/mmu:15369%09red/mmu:15368%09red/mmu:394435%09red/mmu:14151%09red/mmu:70383%09red/mmu:233016%09red/mmu:94284%09red/mmu:394436%09red/mmu:14297%09red/mmu:110006%09red/mmu:15159%09red/mmu:100727%09red/mmu:243085%09red/mmu:107508%09red/mmu:231396%09red/mmu:72094%09red/mmu:77697%09red/mmu:226139%09red/mmu:11656%09red/m…
Nucleotide excision repair	KEGG PATHWAY	mmu03420	40	44	0.00652897	0.00864538	16881|23894|13870|72584|13872|66671|19718|59001|99375|67967|26370|319955|18971|69263|14884|18973|13871|66467|68275|107986|71991|106344|19359|19358|69745|72151|209357|19687|66979|17420|22592|22591|22590|56438|12572|13194|18538|19891|50505|14885	http://www.genome.jp/kegg-bin/show_pathway?mmu03420/mmu:12572%09red/mmu:71991%09red/mmu:22592%09red/mmu:22590%09red/mmu:22591%09red/mmu:72584%09red/mmu:319955%09red/mmu:18971%09red/mmu:18973%09red/mmu:17420%09red/mmu:69745%09red/mmu:13194%09red/mmu:67967%09red/mmu:68275%09red/mmu:56438%09red/mmu:66671%09red/mmu:66979%09red/mmu:107986%09red/mmu:99375%09red/mmu:19358%09red/mmu:19718%09red/mmu:50505…
Other types of O-glycan biosynthesis	KEGG PATHWAY	mmu00514	31	31	0.00656178	0.00864538	14347|14345|54218|20441|20440|19719|14348|217734|381694|26433|14595|140484|240119|234407|16848|57370|68273|280645|98388|76898|99011|53418|232313|269132|268510|223827|224143|108155|80294|17305|101351	http://www.genome.jp/kegg-bin/show_pathway?mmu00514/mmu:99011%09red/mmu:268510%09red/mmu:68273%09red/mmu:98388%09red/mmu:101351%09red/mmu:20440%09red/mmu:20441%09red/mmu:280645%09red/mmu:234407%09red/mmu:54218%09red/mmu:14347%09red/mmu:14345%09red/mmu:14348%09red/mmu:80294%09red/mmu:19719%09red/mmu:240119%09red/mmu:223827%09red/mmu:57370%09red/mmu:26433%09red/mmu:108155%09red/mmu:14595%09red/mmu:…
Propanoate metabolism	KEGG PATHWAY	mmu00640	31	31	0.00656178	0.00864538	60525|20917|20916|66904|16828|12039|110821|74147|93747|11364|110446|13382|104776|73724|227095|97212|268860|107476|110460|12040|16833|16832|106557|52665|380660|17850|56690|68738|13171|56451|100705	http://www.genome.jp/kegg-bin/show_pathway?mmu00640/mmu:107476%09red/mmu:227095%09red/mmu:20916%09red/mmu:20917%09red/mmu:110821%09red/mmu:66904%09red/mmu:11364%09red/mmu:60525%09red/mmu:56451%09red/mmu:52665%09red/mmu:16832%09red/mmu:16833%09red/mmu:104776%09red/mmu:73724%09red/mmu:68738%09red/mmu:97212%09red/mmu:100705%09red/mmu:12040%09red/mmu:13382%09red/mmu:56690%09red/mmu:12039%09red/mmu:93…
Primary immunodeficiency	KEGG PATHWAY	mmu05340	35	37	0.00709052	0.00929794	21947|21354|21355|19264|17060|11486|16453|16197|12525|12501|12500|12504|53970|21939|11628|54167|19374|22637|19373|19727|12526|16186|109305|16818|12518|57916|227525|12478|170767|11634|16151|12229|72049|22256|12265	http://www.genome.jp/kegg-bin/show_pathway?mmu05340/mmu:17060%09red/mmu:22256%09red/mmu:11628%09red/mmu:16818%09red/mmu:227525%09red/mmu:21947%09red/mmu:12518%09red/mmu:72049%09red/mmu:16197%09red/mmu:12478%09red/mmu:53970%09red/mmu:19264%09red/mmu:22637%09red/mmu:21355%09red/mmu:21354%09red/mmu:11486%09red/mmu:16453%09red/mmu:11634%09red/mmu:12229%09red/mmu:12525%09red/mmu:12526%09red/mmu:21939%…
beta-Alanine metabolism	KEGG PATHWAY	mmu00410	32	33	0.00775872	0.0101264	237940|56752|20603|67689|72535|107239|74147|103149|14415|93747|11364|11669|104776|73458|73748|227095|97212|11670|66054|268860|56847|20810|14417|110695|99586|11671|11754|56690|338403|228608|621603|64705	http://www.genome.jp/kegg-bin/show_pathway?mmu00410/mmu:338403%09red/mmu:20810%09red/mmu:227095%09red/mmu:11669%09red/mmu:11364%09red/mmu:107239%09red/mmu:56752%09red/mmu:104776%09red/mmu:20603%09red/mmu:110695%09red/mmu:72535%09red/mmu:237940%09red/mmu:97212%09red/mmu:73458%09red/mmu:621603%09red/mmu:14417%09red/mmu:14415%09red/mmu:67689%09red/mmu:73748%09red/mmu:56690%09red/mmu:11671%09red/mmu:…
Thyroid cancer	KEGG PATHWAY	mmu05216	29	29	0.00839814	0.0109097	17869|18176|19713|18211|26413|26417|109880|22059|19016|16842|12443|59069|26395|21787|26396|76551|16653|108989|12550|27057|15461|21416|20182|20183|21415|21414|12387|20181|18510	http://www.genome.jp/kegg-bin/show_pathway?mmu05216/mmu:12550%09red/mmu:26417%09red/mmu:26413%09red/mmu:18211%09red/mmu:18176%09red/mmu:21416%09red/mmu:21414%09red/mmu:21415%09red/mmu:19713%09red/mmu:19016%09red/mmu:109880%09red/mmu:108989%09red/mmu:12387%09red/mmu:27057%09red/mmu:59069%09red/mmu:76551%09red/mmu:26395%09red/mmu:26396%09red/mmu:18510%09red/mmu:12443%09red/mmu:21787%09red/mmu:22059…
Citrate cycle (TCA cycle)	KEGG PATHWAY	mmu00020	31	32	0.00877427	0.0113453	66945|20917|20916|15929|66925|71832|18598|74551|18293|66052|18597|11428|14194|11429|18563|235339|13382|170718|15926|67834|239017|17449|17448|12974|78920|269951|56451|68263|243996|18534|104112	http://www.genome.jp/kegg-bin/show_pathway?mmu00020/mmu:17448%09red/mmu:17449%09red/mmu:20916%09red/mmu:20917%09red/mmu:66945%09red/mmu:66925%09red/mmu:71832%09red/mmu:269951%09red/mmu:56451%09red/mmu:104112%09red/mmu:78920%09red/mmu:243996%09red/mmu:18563%09red/mmu:18293%09red/mmu:11428%09red/mmu:11429%09red/mmu:68263%09red/mmu:13382%09red/mmu:15929%09red/mmu:18597%09red/mmu:239017%09red/mmu:185…
Alanine, aspartate and glutamate metabolism	KEGG PATHWAY	mmu00250	35	38	0.00923624	0.0118874	214579|108682|52633|14718|14719|11484|11564|11565|14204|14417|14415|100470|231327|53320|11566|216456|227231|268782|70503|69719|268860|14645|14660|14661|11611|11898|14584|108653|14583|73988|212647|109900|194237|76282|269642	http://www.genome.jp/kegg-bin/show_pathway?mmu00250/mmu:14661%09red/mmu:14719%09red/mmu:14645%09red/mmu:108653%09red/mmu:14718%09red/mmu:212647%09red/mmu:14583%09red/mmu:14584%09red/mmu:269642%09red/mmu:227231%09red/mmu:194237%09red/mmu:214579%09red/mmu:14660%09red/mmu:14204%09red/mmu:109900%09red/mmu:11898%09red/mmu:11484%09red/mmu:100470%09red/mmu:11611%09red/mmu:14417%09red/mmu:14415%09red/mmu…
Circadian rhythm	KEGG PATHWAY	mmu04710	30	31	0.00992682	0.012659	19082|26965|217166|21402|104318|19079|12753|103583|12234|241113|225998|105787|20893|108079|12952|12953|19883|12912|19885|18143|108097|27373|56438|108099|11865|79362|18626|18627|18628|50789	http://www.genome.jp/kegg-bin/show_pathway?mmu04710/mmu:12234%09red/mmu:217166%09red/mmu:105787%09red/mmu:241113%09red/mmu:104318%09red/mmu:12753%09red/mmu:19883%09red/mmu:20893%09red/mmu:103583%09red/mmu:19885%09red/mmu:225998%09red/mmu:19079%09red/mmu:56438%09red/mmu:18626%09red/mmu:18628%09red/mmu:26965%09red/mmu:108079%09red/mmu:79362%09red/mmu:50789%09red/mmu:27373%09red/mmu:19082%09red/mmu:…
Pentose phosphate pathway	KEGG PATHWAY	mmu00030	30	31	0.00992682	0.012659	21351|18642|328099|14381|14380|19733|74419|75456|110208|230163|66681|19139|232449|56421|18641|14751|110639|66171|75731|72157|66646|14121|14120|11674|11676|21881|353204|19895|100198|83553	http://www.genome.jp/kegg-bin/show_pathway?mmu00030/mmu:21881%09red/mmu:14751%09red/mmu:75731%09red/mmu:83553%09red/mmu:18642%09red/mmu:18641%09red/mmu:328099%09red/mmu:110639%09red/mmu:353204%09red/mmu:14380%09red/mmu:14121%09red/mmu:19733%09red/mmu:21351%09red/mmu:230163%09red/mmu:14120%09red/mmu:14381%09red/mmu:72157%09red/mmu:100198%09red/mmu:11674%09red/mmu:11676%09red/mmu:19895%09red/mmu:66…
Maturity onset diabetes of the young	KEGG PATHWAY	mmu04950	27	27	0.0107679	0.0134841	18609|16334|20526|15874|18096|17341|18012|16333|15285|15205|21405|15242|18506|18508|18088|15378|18770|378435|26424|15379|30942|21410|320995|103988|15377|15376|11925	http://www.genome.jp/kegg-bin/show_pathway?mmu04950/mmu:18088%09red/mmu:15242%09red/mmu:16333%09red/mmu:15874%09red/mmu:16334%09red/mmu:378435%09red/mmu:18508%09red/mmu:20526%09red/mmu:18506%09red/mmu:18609%09red/mmu:18012%09red/mmu:30942%09red/mmu:21410%09red/mmu:11925%09red/mmu:17341%09red/mmu:15376%09red/mmu:15377%09red/mmu:15378%09red/mmu:15379%09red/mmu:103988%09red/mmu:18096%09red/mmu:15285…
Fatty acid elongation	KEGG PATHWAY	mmu00062	27	27	0.0107679	0.0134841	217698|74559|52538|15107|26922|106529|231086|93747|66775|171282|171281|97212|68801|170439|57874|83603|54325|54326|26897|19063|30963|12686|171210|70025|70757|56348|54397	http://www.genome.jp/kegg-bin/show_pathway?mmu00062/mmu:171210%09red/mmu:83603%09red/mmu:66775%09red/mmu:15107%09red/mmu:106529%09red/mmu:30963%09red/mmu:54325%09red/mmu:54326%09red/mmu:56348%09red/mmu:217698%09red/mmu:68801%09red/mmu:26922%09red/mmu:70025%09red/mmu:52538%09red/mmu:70757%09red/mmu:12686%09red/mmu:57874%09red/mmu:93747%09red/mmu:231086%09red/mmu:170439%09red/mmu:54397%09red/mmu:17…
Butanoate metabolism	KEGG PATHWAY	mmu00650	27	27	0.0107679	0.0134841	214579|272428|71911|208982|15107|20216|74147|14415|353371|93747|15360|78894|11409|110446|69772|97212|67041|217666|268860|110460|233799|15356|64059|14417|117147|233801|208715	http://www.genome.jp/kegg-bin/show_pathway?mmu00650/mmu:208715%09red/mmu:15360%09red/mmu:71911%09red/mmu:15107%09red/mmu:93747%09red/mmu:208982%09red/mmu:214579%09red/mmu:20216%09red/mmu:117147%09red/mmu:97212%09red/mmu:14417%09red/mmu:14415%09red/mmu:15356%09red/mmu:69772%09red/mmu:110460%09red/mmu:233799%09red/mmu:78894%09red/mmu:11409%09red/mmu:268860%09red/mmu:74147%09red/mmu:353371%09red/mmu…
Ascorbate and aldarate metabolism	KEGG PATHWAY	mmu00053	27	27	0.0107679	0.0134841	56752|22238|22236|112417|22235|243085|19733|94215|11669|56727|552899|394433|72094|613123|72535|110695|11671|100727|268756|94284|394436|394435|394434|71773|394432|231396|394430	http://www.genome.jp/kegg-bin/show_pathway?mmu00053/mmu:112417%09red/mmu:268756%09red/mmu:94284%09red/mmu:11669%09red/mmu:56752%09red/mmu:19733%09red/mmu:110695%09red/mmu:100727%09red/mmu:243085%09red/mmu:231396%09red/mmu:72094%09red/mmu:11671%09red/mmu:72535%09red/mmu:71773%09red/mmu:394435%09red/mmu:394430%09red/mmu:394432%09red/mmu:394433%09red/mmu:394434%09red/mmu:94215%09red/mmu:394436%09red…
Glyoxylate and dicarboxylate metabolism	KEGG PATHWAY	mmu00630	29	30	0.0112356	0.0140068	67432|56185|71832|66904|20425|68133|110821|15112|11429|11428|110446|12359|13382|73724|434437|14645|17449|17448|110460|76238|12974|108037|17850|235582|71562|67078|11611|68180|104174	http://www.genome.jp/kegg-bin/show_pathway?mmu00630/mmu:14645%09red/mmu:17448%09red/mmu:17449%09red/mmu:20425%09red/mmu:67432%09red/mmu:68180%09red/mmu:110821%09red/mmu:71832%09red/mmu:66904%09red/mmu:12359%09red/mmu:235582%09red/mmu:76238%09red/mmu:56185%09red/mmu:73724%09red/mmu:71562%09red/mmu:104174%09red/mmu:17850%09red/mmu:11611%09red/mmu:11428%09red/mmu:11429%09red/mmu:13382%09red/mmu:6707…
SNARE interactions in vesicular transport	KEGG PATHWAY	mmu04130	31	33	0.0115648	0.0143527	13852|20619|67727|56494|58244|53620|56389|68159|20333|71116|67023|67474|22320|20907|53612|53331|74732|56216|20908|20909|12068|55943|228960|56418|224630|54399|53334|22317|53330|22319|22318	http://www.genome.jp/kegg-bin/show_pathway?mmu04130/mmu:53612%09red/mmu:67023%09red/mmu:224630%09red/mmu:53331%09red/mmu:12068%09red/mmu:53334%09red/mmu:55943%09red/mmu:56389%09red/mmu:67474%09red/mmu:58244%09red/mmu:228960%09red/mmu:20333%09red/mmu:56418%09red/mmu:74732%09red/mmu:71116%09red/mmu:56494%09red/mmu:20909%09red/mmu:20908%09red/mmu:22320%09red/mmu:20907%09red/mmu:68159%09red/mmu:13852…
Proteasome	KEGG PATHWAY	mmu03050	39	45	0.0118829	0.014682	23996|23997|57296|19182|66537|70247|19186|66413|19184|19185|26443|20422|19181|26442|59029|21762|19179|73902|19172|228769|19170|19177|19175|15978|67089|19192|17463|66997|69077|22123|19166|19167|26444|26441|26440|16912|16913|73677|103554	http://www.genome.jp/kegg-bin/show_pathway?mmu03050/mmu:228769%09red/mmu:70247%09red/mmu:19192%09red/mmu:17463%09red/mmu:20422%09red/mmu:15978%09red/mmu:73677%09red/mmu:66413%09red/mmu:66537%09red/mmu:19167%09red/mmu:19166%09red/mmu:19182%09red/mmu:19181%09red/mmu:19186%09red/mmu:19185%09red/mmu:19184%09red/mmu:66997%09red/mmu:22123%09red/mmu:57296%09red/mmu:26444%09red/mmu:26440%09red/mmu:26441%…
Glycosphingolipid biosynthesis - lacto and neolacto series	KEGG PATHWAY	mmu00601	26	26	0.012202	0.0150096	14347|14345|14344|14343|20441|20449|14348|108105|80908|20443|14594|14595|53625|14538|56546|57370|56375|108902|26878|54613|26877|93961|53418|102637973|72297|231727	http://www.genome.jp/kegg-bin/show_pathway?mmu00601/mmu:108902%09red/mmu:80908%09red/mmu:108105%09red/mmu:20443%09red/mmu:20441%09red/mmu:20449%09red/mmu:56546%09red/mmu:14343%09red/mmu:72297%09red/mmu:14347%09red/mmu:14344%09red/mmu:14345%09red/mmu:231727%09red/mmu:14348%09red/mmu:93961%09red/mmu:14538%09red/mmu:57370%09red/mmu:14595%09red/mmu:14594%09red/mmu:102637973%09red/mmu:53625%09red/mmu:…
DNA replication	KEGG PATHWAY	mmu03030	32	35	0.0133042	0.0162932	19718|17220|16881|19819|59001|14156|67967|18538|19076|19075|18971|69263|18973|327762|17215|17216|17217|68275|17218|17219|106344|72151|19687|66979|69745|18969|18968|381760|67153|68209|69724|19891	http://www.genome.jp/kegg-bin/show_pathway?mmu03030/mmu:17215%09red/mmu:17217%09red/mmu:17216%09red/mmu:14156%09red/mmu:17219%09red/mmu:17218%09red/mmu:18971%09red/mmu:18973%09red/mmu:69745%09red/mmu:69724%09red/mmu:67967%09red/mmu:68275%09red/mmu:19076%09red/mmu:19075%09red/mmu:17220%09red/mmu:72151%09red/mmu:19718%09red/mmu:66979%09red/mmu:381760%09red/mmu:19819%09red/mmu:67153%09red/mmu:19687%…
Type I diabetes mellitus	KEGG PATHWAY	mmu04940	59	77	0.0137868	0.0168102	18646|12876|15893|16334|12487|110557|16333|14961|14972|15007|15006|14102|15002|224761|15000|15510|15043|12524|15040|14985|14415|21926|14964|15024|14997|16160|100504404|19276|15978|14963|14103|14960|16992|15042|19275|14969|667977|16183|15013|15015|15018|14417|110696|14990|14991|12519|15039|14998|14999|224753|16159|15001|16176|16175|16019|14939|630294|240095|399549	http://www.genome.jp/kegg-bin/show_pathway?mmu04940/mmu:14939%09red/mmu:667977%09red/mmu:100529082%09red/mmu:224753%09red/mmu:14999%09red/mmu:14972%09red/mmu:18646%09red/mmu:16183%09red/mmu:12519%09red/mmu:14991%09red/mmu:14990%09red/mmu:21926%09red/mmu:16333%09red/mmu:15978%09red/mmu:19275%09red/mmu:15018%09red/mmu:15015%09red/mmu:14997%09red/mmu:15039%09red/mmu:15006%09red/mmu:15013%09red/mmu:1…
Collecting duct acid secretion	KEGG PATHWAY	mmu04966	26	27	0.016339	0.0198351	66144|11944|11945|338375|27060|21871|11984|12349|73834|66335|110935|242341|20499|20533|11973|11972|76252|66290|11975|11974|68775|140494|11964|11966|56365|74915	http://www.genome.jp/kegg-bin/show_pathway?mmu04966/mmu:11972%09red/mmu:11973%09red/mmu:11974%09red/mmu:11975%09red/mmu:76252%09red/mmu:242341%09red/mmu:27060%09red/mmu:140494%09red/mmu:68775%09red/mmu:11966%09red/mmu:74915%09red/mmu:56365%09red/mmu:12349%09red/mmu:11945%09red/mmu:11944%09red/mmu:11964%09red/mmu:66290%09red/mmu:21871%09red/mmu:11984%09red/mmu:110935%09red/mmu:20533%09red/mmu:6633…
Dorso-ventral axis formation	KEGG PATHWAY	mmu04320	25	26	0.0185313	0.0222057	12877|14011|26413|54418|26417|109880|234857|18131|18132|23872|23871|18128|231207|26395|67579|14784|68166|20663|20662|18129|330890|13649|208922|57749|57746	http://www.genome.jp/kegg-bin/show_pathway?mmu04320/mmu:23872%09red/mmu:14011%09red/mmu:208922%09red/mmu:26417%09red/mmu:57749%09red/mmu:68166%09red/mmu:26413%09red/mmu:330890%09red/mmu:23871%09red/mmu:57746%09red/mmu:18131%09red/mmu:18132%09red/mmu:14784%09red/mmu:20662%09red/mmu:20663%09red/mmu:109880%09red/mmu:234857%09red/mmu:18128%09red/mmu:13649%09red/mmu:26395%09red/mmu:12877%09red/mmu:231…
Phototransduction	KEGG PATHWAY	mmu04744	25	26	0.0185313	0.0222057	14918|14919|19739|14913|212541|70405|14699|12314|12315|12313|245650|80796|214111|494124|107477|18588|14685|333329|18587|14686|225600|14688|24013|12788|19674	http://www.genome.jp/kegg-bin/show_pathway?mmu04744/mmu:225600%09red/mmu:12313%09red/mmu:14688%09red/mmu:107477%09red/mmu:14919%09red/mmu:14918%09red/mmu:14686%09red/mmu:70405%09red/mmu:14913%09red/mmu:18587%09red/mmu:18588%09red/mmu:19739%09red/mmu:245650%09red/mmu:24013%09red/mmu:19674%09red/mmu:12788%09red/mmu:14699%09red/mmu:80796%09red/mmu:212541%09red/mmu:14685%09red/mmu:333329%09red/mmu:49…
Histidine metabolism	KEGG PATHWAY	mmu00340	25	26	0.0185313	0.0222057	56752|17161|76507|140483|15109|11484|107239|56847|15186|67383|11669|71761|73458|66054|109731|72535|14317|110695|11670|11671|13195|338403|243537|621603|67689	http://www.genome.jp/kegg-bin/show_pathway?mmu00340/mmu:338403%09red/mmu:17161%09red/mmu:15186%09red/mmu:11669%09red/mmu:71761%09red/mmu:13195%09red/mmu:107239%09red/mmu:76507%09red/mmu:110695%09red/mmu:72535%09red/mmu:11484%09red/mmu:73458%09red/mmu:621603%09red/mmu:56752%09red/mmu:67689%09red/mmu:67383%09red/mmu:11671%09red/mmu:11670%09red/mmu:243537%09red/mmu:109731%09red/mmu:140483%09red/mmu:…
Base excision repair	KEGG PATHWAY	mmu03410	31	35	0.0192928	0.0230188	16882|16881|21665|18294|11546|59001|11545|14156|67967|18970|18971|18973|70603|17193|18207|71726|56626|72774|66979|77622|69745|22594|11792|234258|268395|18538|328417|382913|15289|235587|22256	http://www.genome.jp/kegg-bin/show_pathway?mmu03410/mmu:22594%09red/mmu:14156%09red/mmu:72774%09red/mmu:234258%09red/mmu:18971%09red/mmu:18970%09red/mmu:18973%09red/mmu:70603%09red/mmu:69745%09red/mmu:67967%09red/mmu:235587%09red/mmu:71726%09red/mmu:382913%09red/mmu:268395%09red/mmu:66979%09red/mmu:11546%09red/mmu:11545%09red/mmu:18294%09red/mmu:17193%09red/mmu:21665%09red/mmu:18207%09red/mmu:117…
Proximal tubule bicarbonate reclamation	KEGG PATHWAY	mmu04964	22	22	0.0202415	0.0240477	67821|74551|11826|12349|14660|27222|216456|11936|54403|11933|11932|11931|232975|17449|14661|76257|12351|98660|27376|105243|11928|18534	http://www.genome.jp/kegg-bin/show_pathway?mmu04964/mmu:14661%09red/mmu:14660%09red/mmu:17449%09red/mmu:11826%09red/mmu:232975%09red/mmu:76257%09red/mmu:12351%09red/mmu:67821%09red/mmu:27222%09red/mmu:105243%09red/mmu:11928%09red/mmu:54403%09red/mmu:12349%09red/mmu:98660%09red/mmu:74551%09red/mmu:27376%09red/mmu:216456%09red/mmu:18534%09red/mmu:11936%09red/mmu:11932%09red/mmu:11933%09red/mmu:1193…
Glycosylphosphatidylinositol(GPI)-anchor biosynthesis	KEGG PATHWAY	mmu00563	24	25	0.0210307	0.0248789	18701|18700|72084|110417|241062|276846|433931|327942|239827|14755|14756|14731|67556|55981|13481|56176|56703|228812|329777|78928|27392|67292|70325|230801	http://www.genome.jp/kegg-bin/show_pathway?mmu00563/mmu:14755%09red/mmu:14756%09red/mmu:72084%09red/mmu:14731%09red/mmu:239827%09red/mmu:67292%09red/mmu:18700%09red/mmu:18701%09red/mmu:329777%09red/mmu:78928%09red/mmu:110417%09red/mmu:327942%09red/mmu:228812%09red/mmu:230801%09red/mmu:56176%09red/mmu:67556%09red/mmu:13481%09red/mmu:241062%09red/mmu:56703%09red/mmu:55981%09red/mmu:70325%09red/mmu:…
Protein export	KEGG PATHWAY	mmu03060	28	31	0.0217486	0.0256191	66286|69019|76687|66384|53421|24067|20335|66212|69089|100101806|20818|56529|66624|101055909|66541|20813|14828|76219|66661|665155|76976|27058|140740|69276|67398|57743|217337|93757	http://www.genome.jp/kegg-bin/show_pathway?mmu03060/mmu:20813%09red/mmu:67398%09red/mmu:20818%09red/mmu:76219%09red/mmu:100101806%09red/mmu:69276%09red/mmu:93757%09red/mmu:57743%09red/mmu:20335%09red/mmu:217337%09red/mmu:56529%09red/mmu:66212%09red/mmu:69089%09red/mmu:66384%09red/mmu:14828%09red/mmu:27058%09red/mmu:53421%09red/mmu:69019%09red/mmu:66661%09red/mmu:140740%09red/mmu:66624%09red/mmu:6…
Glycosaminoglycan degradation	KEGG PATHWAY	mmu00531	21	21	0.0230121	0.0269634	27419|15932|15931|15212|15442|74468|15211|15587|20690|110006|109685|545291|11881|74409|15586|50917|12091|77042|27029|75612|52120	http://www.genome.jp/kegg-bin/show_pathway?mmu00531/mmu:52120%09red/mmu:27419%09red/mmu:109685%09red/mmu:75612%09red/mmu:15442%09red/mmu:74468%09red/mmu:77042%09red/mmu:15587%09red/mmu:15586%09red/mmu:11881%09red/mmu:20690%09red/mmu:27029%09red/mmu:110006%09red/mmu:74409%09red/mmu:15212%09red/mmu:15932%09red/mmu:545291%09red/mmu:15211%09red/mmu:15931%09red/mmu:50917%09red/mmu:12091%09red
Graft-versus-host disease	KEGG PATHWAY	mmu05332	54	72	0.0230838	0.0269634	18646|110557|12487|16640|16641|16643|14961|14972|15007|15006|14102|15002|224761|15000|16627|16193|15043|12524|15040|14985|14964|15024|14997|100504404|15978|14963|14103|14960|15042|14969|667977|16183|15013|16638|15018|16634|110696|14990|14991|12519|15015|15039|14998|14999|224753|21926|15001|16176|16175|16019|14939|630294|240095|399549	http://www.genome.jp/kegg-bin/show_pathway?mmu05332/mmu:14939%09red/mmu:16640%09red/mmu:100529082%09red/mmu:224753%09red/mmu:14999%09red/mmu:14998%09red/mmu:18646%09red/mmu:16183%09red/mmu:12519%09red/mmu:14991%09red/mmu:14990%09red/mmu:21926%09red/mmu:16193%09red/mmu:15978%09red/mmu:16634%09red/mmu:15018%09red/mmu:15015%09red/mmu:14997%09red/mmu:15039%09red/mmu:667977%09red/mmu:15013%09red/mmu:1…
Cytosolic DNA-sensing pathway	KEGG PATHWAY	mmu04623	49	64	0.0233516	0.0271621	70428|77125|66824|70408|15945|18035|19697|245841|18036|20016|66491|58203|74414|16193|67065|67005|12675|18033|69833|54131|15974|19766|67486|214763|15965|242519|56489|78929|56480|66420|54123|72512|383619|16151|230073|12362|56417|69870|20304|230396|20303|16173|16176|218832|16150|26939|228607|56532|26388	http://www.genome.jp/kegg-bin/show_pathway?mmu04623/mmu:67065%09red/mmu:70408%09red/mmu:67005%09red/mmu:230073%09red/mmu:242519%09red/mmu:18035%09red/mmu:66491%09red/mmu:19697%09red/mmu:12675%09red/mmu:16193%09red/mmu:70428%09red/mmu:66824%09red/mmu:56417%09red/mmu:77125%09red/mmu:78929%09red/mmu:72512%09red/mmu:18033%09red/mmu:20303%09red/mmu:18036%09red/mmu:54131%09red/mmu:383619%09red/mmu:5820…
Vitamin digestion and absorption	KEGG PATHWAY	mmu04977	23	24	0.0238829	0.0275496	20522|11808|116914|238055|67096|20509|20778|69698|68421|53320|245532|79235|17250|65969|52466|19660|69060|665270|21452|80721|330064|26363|14603	http://www.genome.jp/kegg-bin/show_pathway?mmu04977/mmu:11808%09red/mmu:116914%09red/mmu:17250%09red/mmu:52466%09red/mmu:26363%09red/mmu:20509%09red/mmu:20522%09red/mmu:245532%09red/mmu:69060%09red/mmu:80721%09red/mmu:67096%09red/mmu:238055%09red/mmu:21452%09red/mmu:53320%09red/mmu:665270%09red/mmu:68421%09red/mmu:69698%09red/mmu:330064%09red/mmu:79235%09red/mmu:65969%09red/mmu:14603%09red/mmu:20…
Glycosaminoglycan biosynthesis - heparan sulfate / heparin	KEGG PATHWAY	mmu00534	23	24	0.0238829	0.0275496	233781|15531|319415|15478|15476|72727|64580|195646|58193|218271|117592|56219|217119|14042|14043|54710|54616|17423|83398|23908|50787|50786|50785	http://www.genome.jp/kegg-bin/show_pathway?mmu00534/mmu:233781%09red/mmu:17423%09red/mmu:319415%09red/mmu:217119%09red/mmu:15478%09red/mmu:64580%09red/mmu:72727%09red/mmu:15476%09red/mmu:218271%09red/mmu:195646%09red/mmu:14043%09red/mmu:14042%09red/mmu:50786%09red/mmu:50787%09red/mmu:23908%09red/mmu:50785%09red/mmu:117592%09red/mmu:83398%09red/mmu:54710%09red/mmu:54616%09red/mmu:58193%09red/mmu:1…
Glycosaminoglycan biosynthesis - chondroitin sulfate / dermatan sulfate	KEGG PATHWAY	mmu00532	20	20	0.0261835	0.0300786	60322|217119|212898|77590|53374|78752|234356|338362|59031|269941|72136|218271|74241|100910|78923|58250|233781|71797|72727|117592	http://www.genome.jp/kegg-bin/show_pathway?mmu00532/mmu:59031%09red/mmu:212898%09red/mmu:74241%09red/mmu:58250%09red/mmu:60322%09red/mmu:53374%09red/mmu:217119%09red/mmu:117592%09red/mmu:78923%09red/mmu:78752%09red/mmu:233781%09red/mmu:338362%09red/mmu:218271%09red/mmu:71797%09red/mmu:100910%09red/mmu:234356%09red/mmu:72727%09red/mmu:77590%09red/mmu:269941%09red/mmu:72136%09red
Asthma	KEGG PATHWAY	mmu05310	24	26	0.027673	0.0316588	21947|16198|15002|15001|15000|20292|16191|19074|16163|100504404|21939|14125|14961|14960|14127|14126|14969|13861|16187|14998|14999|21926|16019|16153	http://www.genome.jp/kegg-bin/show_pathway?mmu05310/mmu:21947%09red/mmu:16198%09red/mmu:14999%09red/mmu:14998%09red/mmu:16191%09red/mmu:21926%09red/mmu:13861%09red/mmu:19074%09red/mmu:16163%09red/mmu:14126%09red/mmu:14127%09red/mmu:14125%09red/mmu:20292%09red/mmu:21939%09red/mmu:14960%09red/mmu:14961%09red/mmu:14969%09red/mmu:16187%09red/mmu:15002%09red/mmu:15000%09red/mmu:15001%09red/mmu:1005044…
One carbon pool by folate	KEGG PATHWAY	mmu00670	19	19	0.0298189	0.0339739	665563|434437|108147|17768|17769|14317|14450|270685|216188|20425|107747|238505|22171|100039707|107885|13361|108037|69606|108156	http://www.genome.jp/kegg-bin/show_pathway?mmu00670/mmu:238505%09red/mmu:434437%09red/mmu:107885%09red/mmu:665563%09red/mmu:17768%09red/mmu:14317%09red/mmu:107747%09red/mmu:69606%09red/mmu:17769%09red/mmu:20425%09red/mmu:108147%09red/mmu:100039707%09red/mmu:108156%09red/mmu:216188%09red/mmu:13361%09red/mmu:108037%09red/mmu:22171%09red/mmu:14450%09red/mmu:270685%09red
African trypanosomiasis	KEGG PATHWAY	mmu05143	31	37	0.0306187	0.0347428	15894|15122|20339|81897|15930|16193|18795|18796|18797|21926|18798|14063|18750|18751|18752|16160|15978|50492|14103|14102|16173|16775|17874|100503605|22329|110257|14682|209176|16159|16176|16153	http://www.genome.jp/kegg-bin/show_pathway?mmu05143/mmu:16775%09red/mmu:14682%09red/mmu:15930%09red/mmu:21926%09red/mmu:16193%09red/mmu:15978%09red/mmu:81897%09red/mmu:50492%09red/mmu:110257%09red/mmu:16160%09red/mmu:209176%09red/mmu:17874%09red/mmu:14102%09red/mmu:14103%09red/mmu:100503605%09red/mmu:20339%09red/mmu:18795%09red/mmu:14063%09red/mmu:22329%09red/mmu:18751%09red/mmu:18750%09red/mmu:1…
Homologous recombination	KEGG PATHWAY	mmu03440	25	28	0.0315818	0.03569	19366|19364|19365|71711|19363|19360|19361|17535|20422|12190|67967|18971|381760|20962|57434|268465|68275|21975|21976|69745|114714|74335|19891|12144|27354	http://www.genome.jp/kegg-bin/show_pathway?mmu03440/mmu:268465%09red/mmu:18971%09red/mmu:20422%09red/mmu:69745%09red/mmu:12144%09red/mmu:67967%09red/mmu:19363%09red/mmu:19361%09red/mmu:19360%09red/mmu:68275%09red/mmu:19366%09red/mmu:19365%09red/mmu:19364%09red/mmu:57434%09red/mmu:114714%09red/mmu:12190%09red/mmu:381760%09red/mmu:74335%09red/mmu:21975%09red/mmu:21976%09red/mmu:17535%09red/mmu:2735…
Other glycan degradation	KEGG PATHWAY	mmu00511	18	18	0.0339927	0.0381047	241159|23956|15211|71665|217364|50877|230101|14466|73744|11593|238023|18010|12091|66848|17160|15212|17159|110173	http://www.genome.jp/kegg-bin/show_pathway?mmu00511/mmu:110173%09red/mmu:17159%09red/mmu:66848%09red/mmu:73744%09red/mmu:50877%09red/mmu:230101%09red/mmu:217364%09red/mmu:17160%09red/mmu:23956%09red/mmu:241159%09red/mmu:18010%09red/mmu:14466%09red/mmu:12091%09red/mmu:15212%09red/mmu:15211%09red/mmu:11593%09red/mmu:71665%09red/mmu:238023%09red
Pantothenate and CoA biosynthesis	KEGG PATHWAY	mmu00770	18	18	0.0339927	0.0381047	269614|66812|75735|67618|103149|209558|71743|211347|12036|12035|26464|99586|22361|106564|18605|73748|64705|74450	http://www.genome.jp/kegg-bin/show_pathway?mmu00770/mmu:18605%09red/mmu:269614%09red/mmu:209558%09red/mmu:103149%09red/mmu:22361%09red/mmu:73748%09red/mmu:106564%09red/mmu:74450%09red/mmu:71743%09red/mmu:99586%09red/mmu:67618%09red/mmu:75735%09red/mmu:211347%09red/mmu:64705%09red/mmu:26464%09red/mmu:12036%09red/mmu:66812%09red/mmu:12035%09red
Phenylalanine metabolism	KEGG PATHWAY	mmu00360	22	24	0.0356877	0.0396847	237940|18478|240549|67689|17161|14718|14719|14204|109731|73988|100470|107146|73458|15445|56847|17319|64697|11670|11754|13195|234724|621603	http://www.genome.jp/kegg-bin/show_pathway?mmu00360/mmu:14719%09red/mmu:14718%09red/mmu:15445%09red/mmu:17161%09red/mmu:17319%09red/mmu:234724%09red/mmu:13195%09red/mmu:240549%09red/mmu:14204%09red/mmu:107146%09red/mmu:100470%09red/mmu:237940%09red/mmu:73458%09red/mmu:621603%09red/mmu:67689%09red/mmu:64697%09red/mmu:11670%09red/mmu:11754%09red/mmu:109731%09red/mmu:73988%09red/mmu:18478%09red/mmu:…
Terpenoid backbone biosynthesis	KEGG PATHWAY	mmu00900	22	24	0.0356877	0.0396847	100039655|57295|14593|71365|66881|320581|15360|110446|68603|110460|52014|67422|15357|14272|230709|17855|208715|192156|56075|110606|319554|19671	http://www.genome.jp/kegg-bin/show_pathway?mmu00900/mmu:14593%09red/mmu:56075%09red/mmu:14272%09red/mmu:15360%09red/mmu:57295%09red/mmu:192156%09red/mmu:208715%09red/mmu:15357%09red/mmu:52014%09red/mmu:68603%09red/mmu:71365%09red/mmu:110446%09red/mmu:230709%09red/mmu:67422%09red/mmu:19671%09red/mmu:66881%09red/mmu:17855%09red/mmu:110606%09red/mmu:319554%09red/mmu:320581%09red/mmu:110460%09red
Selenocompound metabolism	KEGG PATHWAY	mmu00450	17	17	0.0387933	0.0429663	70266|50493|232223|211006|212679|23972|26462|50880|23971|107869|238505|229905|20768|214580|109079|216443|21743	http://www.genome.jp/kegg-bin/show_pathway?mmu00450/mmu:238505%09red/mmu:70266%09red/mmu:216443%09red/mmu:229905%09red/mmu:50493%09red/mmu:214580%09red/mmu:23972%09red/mmu:212679%09red/mmu:50880%09red/mmu:109079%09red/mmu:21743%09red/mmu:23971%09red/mmu:20768%09red/mmu:232223%09red/mmu:26462%09red/mmu:107869%09red/mmu:211006%09red
Arginine biosynthesis	KEGG PATHWAY	mmu00220	19	20	0.0400318	0.0439876	109652|11898|11847|18416|14660|14661|14645|109900|108682|216456|18127|18126|18125|14719|14718|11846|76282|227231|217214	http://www.genome.jp/kegg-bin/show_pathway?mmu00220/mmu:14661%09red/mmu:14719%09red/mmu:14645%09red/mmu:108682%09red/mmu:14718%09red/mmu:11847%09red/mmu:14660%09red/mmu:11846%09red/mmu:217214%09red/mmu:227231%09red/mmu:109652%09red/mmu:18416%09red/mmu:18126%09red/mmu:18127%09red/mmu:18125%09red/mmu:109900%09red/mmu:11898%09red/mmu:216456%09red/mmu:76282%09red
2-Oxocarboxylic acid metabolism	KEGG PATHWAY	mmu01210	19	20	0.0400318	0.0439876	109652|67834|15929|23923|108682|71832|12036|12035|243996|11429|11428|217214|170718|14718|14719|12974|76282|15926|269951	http://www.genome.jp/kegg-bin/show_pathway?mmu01210/mmu:14719%09red/mmu:14718%09red/mmu:23923%09red/mmu:11428%09red/mmu:11429%09red/mmu:67834%09red/mmu:243996%09red/mmu:170718%09red/mmu:269951%09red/mmu:109652%09red/mmu:15929%09red/mmu:15926%09red/mmu:12974%09red/mmu:108682%09red/mmu:217214%09red/mmu:71832%09red/mmu:12036%09red/mmu:76282%09red/mmu:12035%09red
Primary bile acid biosynthesis	KEGG PATHWAY	mmu00120	16	16	0.0443259	0.0485142	17117|101502|15488|26459|56050|170789|93732|12012|13124|13122|13123|12642|104086|208665|20280|13116	http://www.genome.jp/kegg-bin/show_pathway?mmu00120/mmu:20280%09red/mmu:13124%09red/mmu:13123%09red/mmu:13122%09red/mmu:12642%09red/mmu:93732%09red/mmu:101502%09red/mmu:12012%09red/mmu:170789%09red/mmu:56050%09red/mmu:208665%09red/mmu:17117%09red/mmu:104086%09red/mmu:13116%09red/mmu:26459%09red/mmu:15488%09red

## Sheet: HypoTH+T3 vs HypoTH
##Databases: KEGG PATHWAY
##Statistical test method: hypergeometric test / Fisher's exact test
##FDR correction method: Benjamini and Hochberg
#Term	Database	ID	Input number	Background number	P-Value	Corrected P-Value	Input	Hyperlink
Metabolic pathways	KEGG PATHWAY	mmu01100	1157	1298	1.6e-53	4.62e-51	78914|20447|20917|20444|320302|20442|20441|14854|110417|66966|243085|110006|20449|19714|74915|20443|11984|54218|269614|269615|18950|13089|13088|19012|13085|107885|13087|20440|13081|22262|269180|269181|225010|13244|270076|13166|100163|108902|104776|18778|29858|75540|241452|214253|16770|11821|244486|16774|13098|107869|74409|71911|320951|12709|20448|235386|53418|22169|68636|100066|27402|27400|13099|…	http://www.genome.jp/kegg-bin/show_pathway?mmu01100/mmu:16770%09red/mmu:67164%09red/mmu:16774%09red/mmu:68870%09red/mmu:270084%09red/mmu:13200%09red/mmu:225742%09red/mmu:69772%09red/mmu:66966%09red/mmu:74185%09red/mmu:237625%09red/mmu:94284%09red/mmu:100163%09red/mmu:666168%09red/mmu:26459%09red/mmu:331487%09red/mmu:70428%09red/mmu:13195%09red/mmu:11821%09red/mmu:53618%09red/mmu:268860%09red/mmu:…
Olfactory transduction	KEGG PATHWAY	mmu04740	936	1102	7.44e-38	1.07e-35	257985|14918|14919|258527|258524|258257|258522|258398|258520|258521|258395|258394|258397|258330|258258|258259|258528|258392|258097|258688|258158|258156|258155|258154|258153|258151|170639|108058|258952|258320|258321|258322|258323|258324|258325|258326|258327|258328|258329|258098|258525|546747|100042690|258238|258984|258985|258631|258636|258252|258982|258620|258733|233649|258638|258730|258737|258736…	http://www.genome.jp/kegg-bin/show_pathway?mmu04740/mmu:258270%09red/mmu:18361%09red/mmu:258408%09red/mmu:258409%09red/mmu:258402%09red/mmu:258403%09red/mmu:258401%09red/mmu:258406%09red/mmu:258407%09red/mmu:258405%09red/mmu:433031%09red/mmu:258323%09red/mmu:257887%09red/mmu:257919%09red/mmu:64337%09red/mmu:257910%09red/mmu:257913%09red/mmu:257912%09red/mmu:257915%09red/mmu:257917%09red/mmu:25815…
Pathways in cancer	KEGG PATHWAY	mmu05200	382	398	6.53e-22	6.29e-20	14174|14175|14176|14177|14170|14171|14172|14678|19713|14674|14178|14672|19015|14679|19395|14173|14677|19401|12159|16779|14673|16772|16774|16775|14179|12061|12062|14180|14183|27401|14184|13016|13017|18176|433759|13544|12986|19878|12982|13542|13543|19877|14695|14697|14696|14693|12015|14699|18510|26395|67673|26396|13866|56044|16400|12122|20525|67923|12447|12443|18854|15245|12448|12566|17344|14013|14…	http://www.genome.jp/kegg-bin/show_pathway?mmu05200/mmu:16772%09red/mmu:16775%09red/mmu:16774%09red/mmu:16777%09red/mmu:432530%09red/mmu:22409%09red/mmu:18854%09red/mmu:19697%09red/mmu:433759%09red/mmu:67168%09red/mmu:12827%09red/mmu:12826%09red/mmu:12829%09red/mmu:12828%09red/mmu:22423%09red/mmu:15251%09red/mmu:242705%09red/mmu:22413%09red/mmu:14255%09red/mmu:22411%09red/mmu:22410%09red/mmu:2241…
PI3K-Akt signaling pathway	KEGG PATHWAY	mmu04151	317	350	4.04e-16	2.92e-14	14174|14175|14176|17763|14170|12978|14172|94216|22371|13640|14178|13836|56637|56636|12833|14177|14268|329278|12835|17295|16334|12839|17311|15516|14062|319480|320910|12675|67168|14173|16412|12447|13638|13639|11911|20963|21827|14709|192897|52432|80903|13684|19651|22084|16779|14103|65086|16772|245026|320795|16775|16777|12830|12828|12829|12824|12826|12827|208677|110157|13685|26932|15519|21770|14745|1…	http://www.genome.jp/kegg-bin/show_pathway?mmu04151/mmu:13685%09red/mmu:13684%09red/mmu:13638%09red/mmu:16775%09red/mmu:16774%09red/mmu:16777%09red/mmu:67168%09red/mmu:15976%09red/mmu:15975%09red/mmu:19697%09red/mmu:170755%09red/mmu:21923%09red/mmu:19699%09red/mmu:22627%09red/mmu:59032%09red/mmu:81877%09red/mmu:19109%09red/mmu:245026%09red/mmu:18053%09red/mmu:14083%09red/mmu:16779%09red/mmu:12824…
[truncated: 259 more rows]

## Sheet: HyperTH vs Control
##Databases: KEGG PATHWAY
##Statistical test method: hypergeometric test / Fisher's exact test
##FDR correction method: Benjamini and Hochberg
#Term	Database	ID	Input number	Background number	P-Value	Corrected P-Value	Input	Hyperlink
[truncated: 253 more rows]

## Sheet: HyperTH vs HypoTH
##Databases: KEGG PATHWAY
##Statistical test method: hypergeometric test / Fisher's exact test
##FDR correction method: Benjamini and Hochberg
#Term	Database	ID	Input number	Background number	P-Value	Corrected P-Value	Input	Hyperlink
[truncated: 261 more rows]

## Sheet: HyperTH vs HypoTH+T3
##Databases: KEGG PATHWAY
##Statistical test method: hypergeometric test / Fisher's exact test
##FDR correction method: Benjamini and Hochberg
#Term	Database	ID	Input number	Background number	P-Value	Corrected P-Value	Input	Hyperlink
[truncated: 235 more rows]
