# Supplementary material for: Novel Transcriptomic Interactomes of Noncoding RNAs in the Heart under Altered Thyroid Hormonal States
Source: Int J Mol Sci. 2023 Mar 31;24(7):6560. doi: 10.3390/ijms24076560 (PMC10095585; doi:10.3390/ijms24076560)
Supplement: Supplementary file 1 [file ijms-24-06560-s001.zip › Supplemental File S10 Novel mRNA.xlsx]

## Sheet: Supplemental File 10 Novel mRNA
Sequence	Source		Feature	Start	End	Score	Strand	Frame	Attributes
NC_000067.7	Novogene	exon	9615633	9620169	.	+	.	nearest_ref "NM_001357377.1"; exon_number "1"; gene_id "76187"; transcript_name "TCONS_00000014"; gene_biotype "protein_coding"; class_code "j"; transcript_id "TCONS_00000014"; gene_name "Adhfe1"; transcript_biotype "protein_coding"
NC_000067.7	Novogene	exon	9623148	9623201	.	+	.	nearest_ref "NM_001357377.1"; exon_number "2"; gene_id "76187"; transcript_name "TCONS_00000014"; gene_biotype "protein_coding"; class_code "j"; transcript_id "TCONS_00000014"; gene_name "Adhfe1"; transcript_biotype "protein_coding"
NC_000067.7	Novogene	exon	9623543	9623697	.	+	.	nearest_ref "NM_001357377.1"; exon_number "3"; gene_id "76187"; transcript_name "TCONS_00000014"; gene_biotype "protein_coding"; class_code "j"; transcript_id "TCONS_00000014"; gene_name "Adhfe1"; transcript_biotype "protein_coding"
NC_000067.7	Novogene	exon	9623848	9624044	.	+	.	nearest_ref "NM_001357377.1"; exon_number "4"; gene_id "76187"; transcript_name "TCONS_00000014"; gene_biotype "protein_coding"; class_code "j"; transcript_id "TCONS_00000014"; gene_name "Adhfe1"; transcript_biotype "protein_coding"
NC_000067.7	Novogene	exon	9625763	9625840	.	+	.	nearest_ref "NM_001357377.1"; exon_number "5"; gene_id "76187"; transcript_name "TCONS_00000014"; gene_biotype "protein_coding"; class_code "j"; transcript_id "TCONS_00000014"; gene_name "Adhfe1"; transcript_biotype "protein_coding"
NC_000067.7	Novogene	exon	9627225	9627330	.	+	.	nearest_ref "NM_001357377.1"; exon_number "6"; gene_id "76187"; transcript_name "TCONS_00000014"; gene_biotype "protein_coding"; class_code "j"; transcript_id "TCONS_00000014"; gene_name "Adhfe1"; transcript_biotype "protein_coding"
NC_000067.7	Novogene	exon	9628358	9628510	.	+	.	nearest_ref "NM_001357377.1"; exon_number "7"; gene_id "76187"; transcript_name "TCONS_00000014"; gene_biotype "protein_coding"; class_code "j"; transcript_id "TCONS_00000014"; gene_name "Adhfe1"; transcript_biotype "protein_coding"
NC_000067.7	Novogene	exon	9630334	9630432	.	+	.	nearest_ref "NM_001357377.1"; exon_number "8"; gene_id "76187"; transcript_name "TCONS_00000014"; gene_biotype "protein_coding"; class_code "j"; transcript_id "TCONS_00000014"; gene_name "Adhfe1"; transcript_biotype "protein_coding"
NC_000067.7	Novogene	exon	9633734	9633812	.	+	.	nearest_ref "NM_001357377.1"; exon_number "9"; gene_id "76187"; transcript_name "TCONS_00000014"; gene_biotype "protein_coding"; class_code "j"; transcript_id "TCONS_00000014"; gene_name "Adhfe1"; transcript_biotype "protein_coding"
NC_000067.7	Novogene	exon	9634022	9634118	.	+	.	nearest_ref "NM_001357377.1"; exon_number "10"; gene_id "76187"; transcript_name "TCONS_00000014"; gene_biotype "protein_coding"; class_code "j"; transcript_id "TCONS_00000014"; gene_name "Adhfe1"; transcript_biotype "protein_coding"
NC_000067.7	Novogene	exon	9637006	9637163	.	+	.	nearest_ref "NM_001357377.1"; exon_number "11"; gene_id "76187"; transcript_name "TCONS_00000014"; gene_biotype "protein_coding"; class_code "j"; transcript_id "TCONS_00000014"; gene_name "Adhfe1"; transcript_biotype "protein_coding"
NC_000067.7	Novogene	exon	9646416	9648195	.	+	.	nearest_ref "NM_001357377.1"; exon_number "12"; gene_id "76187"; transcript_name "TCONS_00000014"; gene_biotype "protein_coding"; class_code "j"; transcript_id "TCONS_00000014"; gene_name "Adhfe1"; transcript_biotype "protein_coding"
NC_000067.7	Novogene	exon	9618197	9618841	.	+	.	nearest_ref "NM_001357377.1"; exon_number "1"; gene_id "76187"; transcript_name "TCONS_00000017"; gene_biotype "protein_coding"; class_code "j"; transcript_id "TCONS_00000017"; gene_name "Adhfe1"; transcript_biotype "protein_coding"
NC_000067.7	Novogene	exon	9620132	9620169	.	+	.	nearest_ref "NM_001357377.1"; exon_number "2"; gene_id "76187"; transcript_name "TCONS_00000017"; gene_biotype "protein_coding"; class_code "j"; transcript_id "TCONS_00000017"; gene_name "Adhfe1"; transcript_biotype "protein_coding"
NC_000067.7	Novogene	exon	9621942	9621982	.	+	.	nearest_ref "NM_001357377.1"; exon_number "3"; gene_id "76187"; transcript_name "TCONS_00000017"; gene_biotype "protein_coding"; class_code "j"; transcript_id "TCONS_00000017"; gene_name "Adhfe1"; transcript_biotype "protein_coding"
NC_000067.7	Novogene	exon	9623148	9623201	.	+	.	nearest_ref "NM_001357377.1"; exon_number "4"; gene_id "76187"; transcript_name "TCONS_00000017"; gene_biotype "protein_coding"; class_code "j"; transcript_id "TCONS_00000017"; gene_name "Adhfe1"; transcript_biotype "protein_coding"
NC_000067.7	Novogene	exon	9623543	9623697	.	+	.	nearest_ref "NM_001357377.1"; exon_number "5"; gene_id "76187"; transcript_name "TCONS_00000017"; gene_biotype "protein_coding"; class_code "j"; transcript_id "TCONS_00000017"; gene_name "Adhfe1"; transcript_biotype "protein_coding"
NC_000067.7	Novogene	exon	9623848	9624044	.	+	.	nearest_ref "NM_001357377.1"; exon_number "6"; gene_id "76187"; transcript_name "TCONS_00000017"; gene_biotype "protein_coding"; class_code "j"; transcript_id "TCONS_00000017"; gene_name "Adhfe1"; transcript_biotype "protein_coding"
NC_000067.7	Novogene	exon	9625763	9625840	.	+	.	nearest_ref "NM_001357377.1"; exon_number "7"; gene_id "76187"; transcript_name "TCONS_00000017"; gene_biotype "protein_coding"; class_code "j"; transcript_id "TCONS_00000017"; gene_name "Adhfe1"; transcript_biotype "protein_coding"
NC_000067.7	Novogene	exon	9627225	9627330	.	+	.	nearest_ref "NM_001357377.1"; exon_number "8"; gene_id "76187"; transcript_name "TCONS_00000017"; gene_biotype "protein_coding"; class_code "j"; transcript_id "TCONS_00000017"; gene_name "Adhfe1"; transcript_biotype "protein_coding"
NC_000067.7	Novogene	exon	9628358	9628510	.	+	.	nearest_ref "NM_001357377.1"; exon_number "9"; gene_id "76187"; transcript_name "TCONS_00000017"; gene_biotype "protein_coding"; class_code "j"; transcript_id "TCONS_00000017"; gene_name "Adhfe1"; transcript_biotype "protein_coding"
NC_000067.7	Novogene	exon	9630334	9630432	.	+	.	nearest_ref "NM_001357377.1"; exon_number "10"; gene_id "76187"; transcript_name "TCONS_00000017"; gene_biotype "protein_coding"; class_code "j"; transcript_id "TCONS_00000017"; gene_name "Adhfe1"; transcript_biotype "protein_coding"
NC_000067.7	Novogene	exon	9633734	9633812	.	+	.	nearest_ref "NM_001357377.1"; exon_number "11"; gene_id "76187"; transcript_name "TCONS_00000017"; gene_biotype "protein_coding"; class_code "j"; transcript_id "TCONS_00000017"; gene_name "Adhfe1"; transcript_biotype "protein_coding"
NC_000067.7	Novogene	exon	9634022	9634118	.	+	.	nearest_ref "NM_001357377.1"; exon_number "12"; gene_id "76187"; transcript_name "TCONS_00000017"; gene_biotype "protein_coding"; class_code "j"; transcript_id "TCONS_00000017"; gene_name "Adhfe1"; transcript_biotype "protein_coding"
NC_000067.7	Novogene	exon	9637006	9637163	.	+	.	nearest_ref "NM_001357377.1"; exon_number "13"; gene_id "76187"; transcript_name "TCONS_00000017"; gene_biotype "protein_coding"; class_code "j"; transcript_id "TCONS_00000017"; gene_name "Adhfe1"; transcript_biotype "protein_coding"
NC_000067.7	Novogene	exon	9646416	9648195	.	+	.	nearest_ref "NM_001357377.1"; exon_number "14"; gene_id "76187"; transcript_name "TCONS_00000017"; gene_biotype "protein_coding"; class_code "j"; transcript_id "TCONS_00000017"; gene_name "Adhfe1"; transcript_biotype "protein_coding"
NC_000067.7	Novogene	exon	33947306	33947533	.	+	.	nearest_ref "XM_017314621.2"; exon_number "1"; gene_id "13518"; transcript_name "TCONS_00000054"; gene_biotype "protein_coding"; class_code "j"; transcript_id "TCONS_00000054"; gene_name "Dst"; transcript_biotype "protein_coding"
NC_000067.7	Novogene	exon	33948080	33948114	.	+	.	nearest_ref "XM_017314621.2"; exon_number "2"; gene_id "13518"; transcript_name "TCONS_00000054"; gene_biotype "protein_coding"; class_code "j"; transcript_id "TCONS_00000054"; gene_name "Dst"; transcript_biotype "protein_coding"
NC_000067.7	Novogene	exon	34007784	34007984	.	+	.	nearest_ref "XM_017314621.2"; exon_number "3"; gene_id "13518"; transcript_name "TCONS_00000054"; gene_biotype "protein_coding"; class_code "j"; transcript_id "TCONS_00000054"; gene_name "Dst"; transcript_biotype "protein_coding"
NC_000067.7	Novogene	exon	34045272	34050996	.	+	.	nearest_ref "XM_017314621.2"; exon_number "4"; gene_id "13518"; transcript_name "TCONS_00000054"; gene_biotype "protein_coding"; class_code "j"; transcript_id "TCONS_00000054"; gene_name "Dst"; transcript_biotype "protein_coding"
NC_000067.7	Novogene	exon	34125323	34125384	.	+	.	nearest_ref "XM_017314621.2"; exon_number "5"; gene_id "13518"; transcript_name "TCONS_00000054"; gene_biotype "protein_coding"; class_code "j"; transcript_id "TCONS_00000054"; gene_name "Dst"; transcript_biotype "protein_coding"
NC_000067.7	Novogene	exon	34153014	34153103	.	+	.	nearest_ref "XM_017314621.2"; exon_number "6"; gene_id "13518"; transcript_name "TCONS_00000054"; gene_biotype "protein_coding"; class_code "j"; transcript_id "TCONS_00000054"; gene_name "Dst"; transcript_biotype "protein_coding"
NC_000067.7	Novogene	exon	34153630	34153665	.	+	.	nearest_ref "XM_017314621.2"; exon_number "7"; gene_id "13518"; transcript_name "TCONS_00000054"; gene_biotype "protein_coding"; class_code "j"; transcript_id "TCONS_00000054"; gene_name "Dst"; transcript_biotype "protein_coding"
NC_000067.7	Novogene	exon	34155199	34155276	.	+	.	nearest_ref "XM_017314621.2"; exon_number "8"; gene_id "13518"; transcript_name "TCONS_00000054"; gene_biotype "protein_coding"; class_code "j"; transcript_id "TCONS_00000054"; gene_name "Dst"; transcript_biotype "protein_coding"
NC_000067.7	Novogene	exon	34156513	34156605	.	+	.	nearest_ref "XM_017314621.2"; exon_number "9"; gene_id "13518"; transcript_name "TCONS_00000054"; gene_biotype "protein_coding"; class_code "j"; transcript_id "TCONS_00000054"; gene_name "Dst"; transcript_biotype "protein_coding"
NC_000067.7	Novogene	exon	34174171	34174337	.	+	.	nearest_ref "XM_017314621.2"; exon_number "10"; gene_id "13518"; transcript_name "TCONS_00000054"; gene_biotype "protein_coding"; class_code "j"; transcript_id "TCONS_00000054"; gene_name "Dst"; transcript_biotype "protein_coding"
NC_000067.7	Novogene	exon	34191283	34191395	.	+	.	nearest_ref "XM_017314621.2"; exon_number "11"; gene_id "13518"; transcript_name "TCONS_00000054"; gene_biotype "protein_coding"; class_code "j"; transcript_id "TCONS_00000054"; gene_name "Dst"; transcript_biotype "protein_coding"
NC_000067.7	Novogene	exon	34191494	34191600	.	+	.	nearest_ref "XM_017314621.2"; exon_number "12"; gene_id "13518"; transcript_name "TCONS_00000054"; gene_biotype "protein_coding"; class_code "j"; transcript_id "TCONS_00000054"; gene_name "Dst"; transcript_biotype "protein_coding"
NC_000067.7	Novogene	exon	34193594	34193713	.	+	.	nearest_ref "XM_017314621.2"; exon_number "13"; gene_id "13518"; transcript_name "TCONS_00000054"; gene_biotype "protein_coding"; class_code "j"; transcript_id "TCONS_00000054"; gene_name "Dst"; transcript_biotype "protein_coding"
NC_000067.7	Novogene	exon	34195680	34195775	.	+	.	nearest_ref "XM_017314621.2"; exon_number "14"; gene_id "13518"; transcript_name "TCONS_00000054"; gene_biotype "protein_coding"; class_code "j"; transcript_id "TCONS_00000054"; gene_name "Dst"; transcript_biotype "protein_coding"
NC_000067.7	Novogene	exon	34195862	34195989	.	+	.	nearest_ref "XM_017314621.2"; exon_number "15"; gene_id "13518"; transcript_name "TCONS_00000054"; gene_biotype "protein_coding"; class_code "j"; transcript_id "TCONS_00000054"; gene_name "Dst"; transcript_biotype "protein_coding"
NC_000067.7	Novogene	exon	34199701	34199794	.	+	.	nearest_ref "XM_017314621.2"; exon_number "16"; gene_id "13518"; transcript_name "TCONS_00000054"; gene_biotype "protein_coding"; class_code "j"; transcript_id "TCONS_00000054"; gene_name "Dst"; transcript_biotype "protein_coding"
NC_000067.7	Novogene	exon	34200085	34200239	.	+	.	nearest_ref "XM_017314621.2"; exon_number "17"; gene_id "13518"; transcript_name "TCONS_00000054"; gene_biotype "protein_coding"; class_code "j"; transcript_id "TCONS_00000054"; gene_name "Dst"; transcript_biotype "protein_coding"
NC_000067.7	Novogene	exon	34202090	34202552	.	+	.	nearest_ref "XM_017314621.2"; exon_number "18"; gene_id "13518"; transcript_name "TCONS_00000054"; gene_biotype "protein_coding"; class_code "j"; transcript_id "TCONS_00000054"; gene_name "Dst"; transcript_biotype "protein_coding"
NC_000067.7	Novogene	exon	34202707	34202835	.	+	.	nearest_ref "XM_017314621.2"; exon_number "19"; gene_id "13518"; transcript_name "TCONS_00000054"; gene_biotype "protein_coding"; class_code "j"; transcript_id "TCONS_00000054"; gene_name "Dst"; transcript_biotype "protein_coding"
NC_000067.7	Novogene	exon	34202978	34203055	.	+	.	nearest_ref "XM_017314621.2"; exon_number "20"; gene_id "13518"; transcript_name "TCONS_00000054"; gene_biotype "protein_coding"; class_code "j"; transcript_id "TCONS_00000054"; gene_name "Dst"; transcript_biotype "protein_coding"
NC_000067.7	Novogene	exon	34203157	34203318	.	+	.	nearest_ref "XM_017314621.2"; exon_number "21"; gene_id "13518"; transcript_name "TCONS_00000054"; gene_biotype "protein_coding"; class_code "j"; transcript_id "TCONS_00000054"; gene_name "Dst"; transcript_biotype "protein_coding"
NC_000067.7	Novogene	exon	34203408	34203512	.	+	.	nearest_ref "XM_017314621.2"; exon_number "22"; gene_id "13518"; transcript_name "TCONS_00000054"; gene_biotype "protein_coding"; class_code "j"; transcript_id "TCONS_00000054"; gene_name "Dst"; transcript_biotype "protein_coding"
NC_000067.7	Novogene	exon	34204139	34204234	.	+	.	nearest_ref "XM_017314621.2"; exon_number "23"; gene_id "13518"; transcript_name "TCONS_00000054"; gene_biotype "protein_coding"; class_code "j"; transcript_id "TCONS_00000054"; gene_name "Dst"; transcript_biotype "protein_coding"
NC_000067.7	Novogene	exon	34205261	34205386	.	+	.	nearest_ref "XM_017314621.2"; exon_number "24"; gene_id "13518"; transcript_name "TCONS_00000054"; gene_biotype "protein_coding"; class_code "j"; transcript_id "TCONS_00000054"; gene_name "Dst"; transcript_biotype "protein_coding"
NC_000067.7	Novogene	exon	34206020	34206172	.	+	.	nearest_ref "XM_017314621.2"; exon_number "25"; gene_id "13518"; transcript_name "TCONS_00000054"; gene_biotype "protein_coding"; class_code "j"; transcript_id "TCONS_00000054"; gene_name "Dst"; transcript_biotype "protein_coding"
NC_000067.7	Novogene	exon	34206357	34206511	.	+	.	nearest_ref "XM_017314621.2"; exon_number "26"; gene_id "13518"; transcript_name "TCONS_00000054"; gene_biotype "protein_coding"; class_code "j"; transcript_id "TCONS_00000054"; gene_name "Dst"; transcript_biotype "protein_coding"
NC_000067.7	Novogene	exon	34206692	34206818	.	+	.	nearest_ref "XM_017314621.2"; exon_number "27"; gene_id "13518"; transcript_name "TCONS_00000054"; gene_biotype "protein_coding"; class_code "j"; transcript_id "TCONS_00000054"; gene_name "Dst"; transcript_biotype "protein_coding"
NC_000067.7	Novogene	exon	34206904	34207087	.	+	.	nearest_ref "XM_017314621.2"; exon_number "28"; gene_id "13518"; transcript_name "TCONS_00000054"; gene_biotype "protein_coding"; class_code "j"; transcript_id "TCONS_00000054"; gene_name "Dst"; transcript_biotype "protein_coding"
NC_000067.7	Novogene	exon	34208245	34208402	.	+	.	nearest_ref "XM_017314621.2"; exon_number "29"; gene_id "13518"; transcript_name "TCONS_00000054"; gene_biotype "protein_coding"; class_code "j"; transcript_id "TCONS_00000054"; gene_name "Dst"; transcript_biotype "protein_coding"
NC_000067.7	Novogene	exon	34208831	34209009	.	+	.	nearest_ref "XM_017314621.2"; exon_number "30"; gene_id "13518"; transcript_name "TCONS_00000054"; gene_biotype "protein_coding"; class_code "j"; transcript_id "TCONS_00000054"; gene_name "Dst"; transcript_biotype "protein_coding"
NC_000067.7	Novogene	exon	34209441	34209579	.	+	.	nearest_ref "XM_017314621.2"; exon_number "31"; gene_id "13518"; transcript_name "TCONS_00000054"; gene_biotype "protein_coding"; class_code "j"; transcript_id "TCONS_00000054"; gene_name "Dst"; transcript_biotype "protein_coding"
NC_000067.7	Novogene	exon	34210197	34210390	.	+	.	nearest_ref "XM_017314621.2"; exon_number "32"; gene_id "13518"; transcript_name "TCONS_00000054"; gene_biotype "protein_coding"; class_code "j"; transcript_id "TCONS_00000054"; gene_name "Dst"; transcript_biotype "protein_coding"
NC_000067.7	Novogene	exon	34211264	34211426	.	+	.	nearest_ref "XM_017314621.2"; exon_number "33"; gene_id "13518"; transcript_name "TCONS_00000054"; gene_biotype "protein_coding"; class_code "j"; transcript_id "TCONS_00000054"; gene_name "Dst"; transcript_biotype "protein_coding"
NC_000067.7	Novogene	exon	34212083	34212166	.	+	.	nearest_ref "XM_017314621.2"; exon_number "34"; gene_id "13518"; transcript_name "TCONS_00000054"; gene_biotype "protein_coding"; class_code "j"; transcript_id "TCONS_00000054"; gene_name "Dst"; transcript_biotype "protein_coding"
NC_000067.7	Novogene	exon	34213196	34213303	.	+	.	nearest_ref "XM_017314621.2"; exon_number "35"; gene_id "13518"; transcript_name "TCONS_00000054"; gene_biotype "protein_coding"; class_code "j"; transcript_id "TCONS_00000054"; gene_name "Dst"; transcript_biotype "protein_coding"
NC_000067.7	Novogene	exon	34213778	34213876	.	+	.	nearest_ref "XM_017314621.2"; exon_number "36"; gene_id "13518"; transcript_name "TCONS_00000054"; gene_biotype "protein_coding"; class_code "j"; transcript_id "TCONS_00000054"; gene_name "Dst"; transcript_biotype "protein_coding"
NC_000067.7	Novogene	exon	34223097	34223225	.	+	.	nearest_ref "XM_017314621.2"; exon_number "37"; gene_id "13518"; transcript_name "TCONS_00000054"; gene_biotype "protein_coding"; class_code "j"; transcript_id "TCONS_00000054"; gene_name "Dst"; transcript_biotype "protein_coding"
NC_000067.7	Novogene	exon	34225043	34225131	.	+	.	nearest_ref "XM_017314621.2"; exon_number "38"; gene_id "13518"; transcript_name "TCONS_00000054"; gene_biotype "protein_coding"; class_code "j"; transcript_id "TCONS_00000054"; gene_name "Dst"; transcript_biotype "protein_coding"
NC_000067.7	Novogene	exon	34225900	34226032	.	+	.	nearest_ref "XM_017314621.2"; exon_number "39"; gene_id "13518"; transcript_name "TCONS_00000054"; gene_biotype "protein_coding"; class_code "j"; transcript_id "TCONS_00000054"; gene_name "Dst"; transcript_biotype "protein_coding"
NC_000067.7	Novogene	exon	34227053	34232344	.	+	.	nearest_ref "XM_017314621.2"; exon_number "40"; gene_id "13518"; transcript_name "TCONS_00000054"; gene_biotype "protein_coding"; class_code "j"; transcript_id "TCONS_00000054"; gene_name "Dst"; transcript_biotype "protein_coding"
NC_000067.7	Novogene	exon	34232473	34232622	.	+	.	nearest_ref "XM_017314621.2"; exon_number "41"; gene_id "13518"; transcript_name "TCONS_00000054"; gene_biotype "protein_coding"; class_code "j"; transcript_id "TCONS_00000054"; gene_name "Dst"; transcript_biotype "protein_coding"
NC_000067.7	Novogene	exon	34233086	34233301	.	+	.	nearest_ref "XM_017314621.2"; exon_number "42"; gene_id "13518"; transcript_name "TCONS_00000054"; gene_biotype "protein_coding"; class_code "j"; transcript_id "TCONS_00000054"; gene_name "Dst"; transcript_biotype "protein_coding"
NC_000067.7	Novogene	exon	34233596	34233745	.	+	.	nearest_ref "XM_017314621.2"; exon_number "43"; gene_id "13518"; transcript_name "TCONS_00000054"; gene_biotype "protein_coding"; class_code "j"; transcript_id "TCONS_00000054"; gene_name "Dst"; transcript_biotype "protein_coding"
NC_000067.7	Novogene	exon	34234909	34235142	.	+	.	nearest_ref "XM_017314621.2"; exon_number "44"; gene_id "13518"; transcript_name "TCONS_00000054"; gene_biotype "protein_coding"; class_code "j"; transcript_id "TCONS_00000054"; gene_name "Dst"; transcript_biotype "protein_coding"
NC_000067.7	Novogene	exon	34236282	34236434	.	+	.	nearest_ref "XM_017314621.2"; exon_number "45"; gene_id "13518"; transcript_name "TCONS_00000054"; gene_biotype "protein_coding"; class_code "j"; transcript_id "TCONS_00000054"; gene_name "Dst"; transcript_biotype "protein_coding"
NC_000067.7	Novogene	exon	34237599	34237832	.	+	.	nearest_ref "XM_017314621.2"; exon_number "46"; gene_id "13518"; transcript_name "TCONS_00000054"; gene_biotype "protein_coding"; class_code "j"; transcript_id "TCONS_00000054"; gene_name "Dst"; transcript_biotype "protein_coding"
NC_000067.7	Novogene	exon	34238373	34238639	.	+	.	nearest_ref "XM_017314621.2"; exon_number "47"; gene_id "13518"; transcript_name "TCONS_00000054"; gene_biotype "protein_coding"; class_code "j"; transcript_id "TCONS_00000054"; gene_name "Dst"; transcript_biotype "protein_coding"
NC_000067.7	Novogene	exon	34239951	34240496	.	+	.	nearest_ref "XM_017314621.2"; exon_number "48"; gene_id "13518"; transcript_name "TCONS_00000054"; gene_biotype "protein_coding"; class_code "j"; transcript_id "TCONS_00000054"; gene_name "Dst"; transcript_biotype "protein_coding"
NC_000067.7	Novogene	exon	34241526	34241702	.	+	.	nearest_ref "XM_017314621.2"; exon_number "49"; gene_id "13518"; transcript_name "TCONS_00000054"; gene_biotype "protein_coding"; class_code "j"; transcript_id "TCONS_00000054"; gene_name "Dst"; transcript_biotype "protein_coding"
NC_000067.7	Novogene	exon	34247635	34247758	.	+	.	nearest_ref "XM_017314621.2"; exon_number "50"; gene_id "13518"; transcript_name "TCONS_00000054"; gene_biotype "protein_coding"; class_code "j"; transcript_id "TCONS_00000054"; gene_name "Dst"; transcript_biotype "protein_coding"
NC_000067.7	Novogene	exon	34250235	34250443	.	+	.	nearest_ref "XM_017314621.2"; exon_number "51"; gene_id "13518"; transcript_name "TCONS_00000054"; gene_biotype "protein_coding"; class_code "j"; transcript_id "TCONS_00000054"; gene_name "Dst"; transcript_biotype "protein_coding"
NC_000067.7	Novogene	exon	34251303	34251620	.	+	.	nearest_ref "XM_017314621.2"; exon_number "52"; gene_id "13518"; transcript_name "TCONS_00000054"; gene_biotype "protein_coding"; class_code "j"; transcript_id "TCONS_00000054"; gene_name "Dst"; transcript_biotype "protein_coding"
NC_000067.7	Novogene	exon	34251983	34252149	.	+	.	nearest_ref "XM_017314621.2"; exon_number "53"; gene_id "13518"; transcript_name "TCONS_00000054"; gene_biotype "protein_coding"; class_code "j"; transcript_id "TCONS_00000054"; gene_name "Dst"; transcript_biotype "protein_coding"
NC_000067.7	Novogene	exon	34253615	34253771	.	+	.	nearest_ref "XM_017314621.2"; exon_number "54"; gene_id "13518"; transcript_name "TCONS_00000054"; gene_biotype "protein_coding"; class_code "j"; transcript_id "TCONS_00000054"; gene_name "Dst"; transcript_biotype "protein_coding"
NC_000067.7	Novogene	exon	34254567	34254693	.	+	.	nearest_ref "XM_017314621.2"; exon_number "55"; gene_id "13518"; transcript_name "TCONS_00000054"; gene_biotype "protein_coding"; class_code "j"; transcript_id "TCONS_00000054"; gene_name "Dst"; transcript_biotype "protein_coding"
NC_000067.7	Novogene	exon	34256891	34256953	.	+	.	nearest_ref "XM_017314621.2"; exon_number "56"; gene_id "13518"; transcript_name "TCONS_00000054"; gene_biotype "protein_coding"; class_code "j"; transcript_id "TCONS_00000054"; gene_name "Dst"; transcript_biotype "protein_coding"
NC_000067.7	Novogene	exon	34257416	34257657	.	+	.	nearest_ref "XM_017314621.2"; exon_number "57"; gene_id "13518"; transcript_name "TCONS_00000054"; gene_biotype "protein_coding"; class_code "j"; transcript_id "TCONS_00000054"; gene_name "Dst"; transcript_biotype "protein_coding"
NC_000067.7	Novogene	exon	34258477	34258606	.	+	.	nearest_ref "XM_017314621.2"; exon_number "58"; gene_id "13518"; transcript_name "TCONS_00000054"; gene_biotype "protein_coding"; class_code "j"; transcript_id "TCONS_00000054"; gene_name "Dst"; transcript_biotype "protein_coding"
NC_000067.7	Novogene	exon	34262885	34263084	.	+	.	nearest_ref "XM_017314621.2"; exon_number "59"; gene_id "13518"; transcript_name "TCONS_00000054"; gene_biotype "protein_coding"; class_code "j"; transcript_id "TCONS_00000054"; gene_name "Dst"; transcript_biotype "protein_coding"
NC_000067.7	Novogene	exon	34264590	34265085	.	+	.	nearest_ref "XM_017314621.2"; exon_number "60"; gene_id "13518"; transcript_name "TCONS_00000054"; gene_biotype "protein_coding"; class_code "j"; transcript_id "TCONS_00000054"; gene_name "Dst"; transcript_biotype "protein_coding"
NC_000067.7	Novogene	exon	34266856	34268327	.	+	.	nearest_ref "XM_017314621.2"; exon_number "61"; gene_id "13518"; transcript_name "TCONS_00000054"; gene_biotype "protein_coding"; class_code "j"; transcript_id "TCONS_00000054"; gene_name "Dst"; transcript_biotype "protein_coding"
NC_000067.7	Novogene	exon	34281700	34281861	.	+	.	nearest_ref "XM_017314621.2"; exon_number "62"; gene_id "13518"; transcript_name "TCONS_00000054"; gene_biotype "protein_coding"; class_code "j"; transcript_id "TCONS_00000054"; gene_name "Dst"; transcript_biotype "protein_coding"
NC_000067.7	Novogene	exon	34283425	34283595	.	+	.	nearest_ref "XM_017314621.2"; exon_number "63"; gene_id "13518"; transcript_name "TCONS_00000054"; gene_biotype "protein_coding"; class_code "j"; transcript_id "TCONS_00000054"; gene_name "Dst"; transcript_biotype "protein_coding"
NC_000067.7	Novogene	exon	34286730	34286896	.	+	.	nearest_ref "XM_017314621.2"; exon_number "64"; gene_id "13518"; transcript_name "TCONS_00000054"; gene_biotype "protein_coding"; class_code "j"; transcript_id "TCONS_00000054"; gene_name "Dst"; transcript_biotype "protein_coding"
NC_000067.7	Novogene	exon	34288560	34288719	.	+	.	nearest_ref "XM_017314621.2"; exon_number "65"; gene_id "13518"; transcript_name "TCONS_00000054"; gene_biotype "protein_coding"; class_code "j"; transcript_id "TCONS_00000054"; gene_name "Dst"; transcript_biotype "protein_coding"
NC_000067.7	Novogene	exon	34288885	34289211	.	+	.	nearest_ref "XM_017314621.2"; exon_number "66"; gene_id "13518"; transcript_name "TCONS_00000054"; gene_biotype "protein_coding"; class_code "j"; transcript_id "TCONS_00000054"; gene_name "Dst"; transcript_biotype "protein_coding"
NC_000067.7	Novogene	exon	34289691	34289775	.	+	.	nearest_ref "XM_017314621.2"; exon_number "67"; gene_id "13518"; transcript_name "TCONS_00000054"; gene_biotype "protein_coding"; class_code "j"; transcript_id "TCONS_00000054"; gene_name "Dst"; transcript_biotype "protein_coding"
NC_000067.7	Novogene	exon	34290777	34291018	.	+	.	nearest_ref "XM_017314621.2"; exon_number "68"; gene_id "13518"; transcript_name "TCONS_00000054"; gene_biotype "protein_coding"; class_code "j"; transcript_id "TCONS_00000054"; gene_name "Dst"; transcript_biotype "protein_coding"
NC_000067.7	Novogene	exon	34291892	34292098	.	+	.	nearest_ref "XM_017314621.2"; exon_number "69"; gene_id "13518"; transcript_name "TCONS_00000054"; gene_biotype "protein_coding"; class_code "j"; transcript_id "TCONS_00000054"; gene_name "Dst"; transcript_biotype "protein_coding"
NC_000067.7	Novogene	exon	34295313	34295432	.	+	.	nearest_ref "XM_017314621.2"; exon_number "70"; gene_id "13518"; transcript_name "TCONS_00000054"; gene_biotype "protein_coding"; class_code "j"; transcript_id "TCONS_00000054"; gene_name "Dst"; transcript_biotype "protein_coding"
NC_000067.7	Novogene	exon	34295623	34295730	.	+	.	nearest_ref "XM_017314621.2"; exon_number "71"; gene_id "13518"; transcript_name "TCONS_00000054"; gene_biotype "protein_coding"; class_code "j"; transcript_id "TCONS_00000054"; gene_name "Dst"; transcript_biotype "protein_coding"
NC_000067.7	Novogene	exon	34296803	34297021	.	+	.	nearest_ref "XM_017314621.2"; exon_number "72"; gene_id "13518"; transcript_name "TCONS_00000054"; gene_biotype "protein_coding"; class_code "j"; transcript_id "TCONS_00000054"; gene_name "Dst"; transcript_biotype "protein_coding"
NC_000067.7	Novogene	exon	34299245	34299448	.	+	.	nearest_ref "XM_017314621.2"; exon_number "73"; gene_id "13518"; transcript_name "TCONS_00000054"; gene_biotype "protein_coding"; class_code "j"; transcript_id "TCONS_00000054"; gene_name "Dst"; transcript_biotype "protein_coding"
NC_000067.7	Novogene	exon	34301101	34301332	.	+	.	nearest_ref "XM_017314621.2"; exon_number "74"; gene_id "13518"; transcript_name "TCONS_00000054"; gene_biotype "protein_coding"; class_code "j"; transcript_id "TCONS_00000054"; gene_name "Dst"; transcript_biotype "protein_coding"
NC_000067.7	Novogene	exon	34302345	34302571	.	+	.	nearest_ref "XM_017314621.2"; exon_number "75"; gene_id "13518"; transcript_name "TCONS_00000054"; gene_biotype "protein_coding"; class_code "j"; transcript_id "TCONS_00000054"; gene_name "Dst"; transcript_biotype "protein_coding"
NC_000067.7	Novogene	exon	34303606	34303728	.	+	.	nearest_ref "XM_017314621.2"; exon_number "76"; gene_id "13518"; transcript_name "TCONS_00000054"; gene_biotype "protein_coding"; class_code "j"; transcript_id "TCONS_00000054"; gene_name "Dst"; transcript_biotype "protein_coding"
NC_000067.7	Novogene	exon	34303831	34303932	.	+	.	nearest_ref "XM_017314621.2"; exon_number "77"; gene_id "13518"; transcript_name "TCONS_00000054"; gene_biotype "protein_coding"; class_code "j"; transcript_id "TCONS_00000054"; gene_name "Dst"; transcript_biotype "protein_coding"
NC_000067.7	Novogene	exon	34305938	34306039	.	+	.	nearest_ref "XM_017314621.2"; exon_number "78"; gene_id "13518"; transcript_name "TCONS_00000054"; gene_biotype "protein_coding"; class_code "j"; transcript_id "TCONS_00000054"; gene_name "Dst"; transcript_biotype "protein_coding"
NC_000067.7	Novogene	exon	34307310	34307483	.	+	.	nearest_ref "XM_017314621.2"; exon_number "79"; gene_id "13518"; transcript_name "TCONS_00000054"; gene_biotype "protein_coding"; class_code "j"; transcript_id "TCONS_00000054"; gene_name "Dst"; transcript_biotype "protein_coding"
NC_000067.7	Novogene	exon	34307816	34307971	.	+	.	nearest_ref "XM_017314621.2"; exon_number "80"; gene_id "13518"; transcript_name "TCONS_00000054"; gene_biotype "protein_coding"; class_code "j"; transcript_id "TCONS_00000054"; gene_name "Dst"; transcript_biotype "protein_coding"
NC_000067.7	Novogene	exon	34309909	34310106	.	+	.	nearest_ref "XM_017314621.2"; exon_number "81"; gene_id "13518"; transcript_name "TCONS_00000054"; gene_biotype "protein_coding"; class_code "j"; transcript_id "TCONS_00000054"; gene_name "Dst"; transcript_biotype "protein_coding"
NC_000067.7	Novogene	exon	34310436	34310564	.	+	.	nearest_ref "XM_017314621.2"; exon_number "82"; gene_id "13518"; transcript_name "TCONS_00000054"; gene_biotype "protein_coding"; class_code "j"; transcript_id "TCONS_00000054"; gene_name "Dst"; transcript_biotype "protein_coding"
NC_000067.7	Novogene	exon	34313249	34313419	.	+	.	nearest_ref "XM_017314621.2"; exon_number "83"; gene_id "13518"; transcript_name "TCONS_00000054"; gene_biotype "protein_coding"; class_code "j"; transcript_id "TCONS_00000054"; gene_name "Dst"; transcript_biotype "protein_coding"
NC_000067.7	Novogene	exon	34314286	34314441	.	+	.	nearest_ref "XM_017314621.2"; exon_number "84"; gene_id "13518"; transcript_name "TCONS_00000054"; gene_biotype "protein_coding"; class_code "j"; transcript_id "TCONS_00000054"; gene_name "Dst"; transcript_biotype "protein_coding"
NC_000067.7	Novogene	exon	34314754	34314960	.	+	.	nearest_ref "XM_017314621.2"; exon_number "85"; gene_id "13518"; transcript_name "TCONS_00000054"; gene_biotype "protein_coding"; class_code "j"; transcript_id "TCONS_00000054"; gene_name "Dst"; transcript_biotype "protein_coding"
NC_000067.7	Novogene	exon	34317101	34317220	.	+	.	nearest_ref "XM_017314621.2"; exon_number "86"; gene_id "13518"; transcript_name "TCONS_00000054"; gene_biotype "protein_coding"; class_code "j"; transcript_id "TCONS_00000054"; gene_name "Dst"; transcript_biotype "protein_coding"
NC_000067.7	Novogene	exon	34321504	34321673	.	+	.	nearest_ref "XM_017314621.2"; exon_number "87"; gene_id "13518"; transcript_name "TCONS_00000054"; gene_biotype "protein_coding"; class_code "j"; transcript_id "TCONS_00000054"; gene_name "Dst"; transcript_biotype "protein_coding"
NC_000067.7	Novogene	exon	34323340	34323499	.	+	.	nearest_ref "XM_017314621.2"; exon_number "88"; gene_id "13518"; transcript_name "TCONS_00000054"; gene_biotype "protein_coding"; class_code "j"; transcript_id "TCONS_00000054"; gene_name "Dst"; transcript_biotype "protein_coding"
NC_000067.7	Novogene	exon	34326268	34326462	.	+	.	nearest_ref "XM_017314621.2"; exon_number "89"; gene_id "13518"; transcript_name "TCONS_00000054"; gene_biotype "protein_coding"; class_code "j"; transcript_id "TCONS_00000054"; gene_name "Dst"; transcript_biotype "protein_coding"
NC_000067.7	Novogene	exon	34326972	34327100	.	+	.	nearest_ref "XM_017314621.2"; exon_number "90"; gene_id "13518"; transcript_name "TCONS_00000054"; gene_biotype "protein_coding"; class_code "j"; transcript_id "TCONS_00000054"; gene_name "Dst"; transcript_biotype "protein_coding"
NC_000067.7	Novogene	exon	34328605	34328748	.	+	.	nearest_ref "XM_017314621.2"; exon_number "91"; gene_id "13518"; transcript_name "TCONS_00000054"; gene_biotype "protein_coding"; class_code "j"; transcript_id "TCONS_00000054"; gene_name "Dst"; transcript_biotype "protein_coding"
NC_000067.7	Novogene	exon	34329440	34329628	.	+	.	nearest_ref "XM_017314621.2"; exon_number "92"; gene_id "13518"; transcript_name "TCONS_00000054"; gene_biotype "protein_coding"; class_code "j"; transcript_id "TCONS_00000054"; gene_name "Dst"; transcript_biotype "protein_coding"
NC_000067.7	Novogene	exon	34330868	34330997	.	+	.	nearest_ref "XM_017314621.2"; exon_number "93"; gene_id "13518"; transcript_name "TCONS_00000054"; gene_biotype "protein_coding"; class_code "j"; transcript_id "TCONS_00000054"; gene_name "Dst"; transcript_biotype "protein_coding"
NC_000067.7	Novogene	exon	34332401	34332564	.	+	.	nearest_ref "XM_017314621.2"; exon_number "94"; gene_id "13518"; transcript_name "TCONS_00000054"; gene_biotype "protein_coding"; class_code "j"; transcript_id "TCONS_00000054"; gene_name "Dst"; transcript_biotype "protein_coding"
NC_000067.7	Novogene	exon	34333465	34333627	.	+	.	nearest_ref "XM_017314621.2"; exon_number "95"; gene_id "13518"; transcript_name "TCONS_00000054"; gene_biotype "protein_coding"; class_code "j"; transcript_id "TCONS_00000054"; gene_name "Dst"; transcript_biotype "protein_coding"
NC_000067.7	Novogene	exon	34334235	34334389	.	+	.	nearest_ref "XM_017314621.2"; exon_number "96"; gene_id "13518"; transcript_name "TCONS_00000054"; gene_biotype "protein_coding"; class_code "j"; transcript_id "TCONS_00000054"; gene_name "Dst"; transcript_biotype "protein_coding"
NC_000067.7	Novogene	exon	34334543	34334617	.	+	.	nearest_ref "XM_017314621.2"; exon_number "97"; gene_id "13518"; transcript_name "TCONS_00000054"; gene_biotype "protein_coding"; class_code "j"; transcript_id "TCONS_00000054"; gene_name "Dst"; transcript_biotype "protein_coding"
NC_000067.7	Novogene	exon	34335823	34335840	.	+	.	nearest_ref "XM_017314621.2"; exon_number "98"; gene_id "13518"; transcript_name "TCONS_00000054"; gene_biotype "protein_coding"; class_code "j"; transcript_id "TCONS_00000054"; gene_name "Dst"; transcript_biotype "protein_coding"
NC_000067.7	Novogene	exon	34338802	34338919	.	+	.	nearest_ref "XM_017314621.2"; exon_number "99"; gene_id "13518"; transcript_name "TCONS_00000054"; gene_biotype "protein_coding"; class_code "j"; transcript_id "TCONS_00000054"; gene_name "Dst"; transcript_biotype "protein_coding"
NC_000067.7	Novogene	exon	34340942	34341013	.	+	.	nearest_ref "XM_017314621.2"; exon_number "100"; gene_id "13518"; transcript_name "TCONS_00000054"; gene_biotype "protein_coding"; class_code "j"; transcript_id "TCONS_00000054"; gene_name "Dst"; transcript_biotype "protein_coding"
NC_000067.7	Novogene	exon	34341911	34342113	.	+	.	nearest_ref "XM_017314621.2"; exon_number "101"; gene_id "13518"; transcript_name "TCONS_00000054"; gene_biotype "protein_coding"; class_code "j"; transcript_id "TCONS_00000054"; gene_name "Dst"; transcript_biotype "protein_coding"
NC_000067.7	Novogene	exon	34342502	34342612	.	+	.	nearest_ref "XM_017314621.2"; exon_number "102"; gene_id "13518"; transcript_name "TCONS_00000054"; gene_biotype "protein_coding"; class_code "j"; transcript_id "TCONS_00000054"; gene_name "Dst"; transcript_biotype "protein_coding"
NC_000067.7	Novogene	exon	34345609	34345732	.	+	.	nearest_ref "XM_017314621.2"; exon_number "103"; gene_id "13518"; transcript_name "TCONS_00000054"; gene_biotype "protein_coding"; class_code "j"; transcript_id "TCONS_00000054"; gene_name "Dst"; transcript_biotype "protein_coding"
NC_000067.7	Novogene	exon	34346411	34347733	.	+	.	nearest_ref "XM_017314621.2"; exon_number "104"; gene_id "13518"; transcript_name "TCONS_00000054"; gene_biotype "protein_coding"; class_code "j"; transcript_id "TCONS_00000054"; gene_name "Dst"; transcript_biotype "protein_coding"
NC_000067.7	Novogene	exon	34044984	34045089	.	+	.	nearest_ref "XM_017314621.2"; exon_number "1"; gene_id "13518"; transcript_name "TCONS_00000056"; gene_biotype "protein_coding"; class_code "j"; transcript_id "TCONS_00000056"; gene_name "Dst"; transcript_biotype "protein_coding"
NC_000067.7	Novogene	exon	34045272	34045479	.	+	.	nearest_ref "XM_017314621.2"; exon_number "2"; gene_id "13518"; transcript_name "TCONS_00000056"; gene_biotype "protein_coding"; class_code "j"; transcript_id "TCONS_00000056"; gene_name "Dst"; transcript_biotype "protein_coding"
NC_000067.7	Novogene	exon	34125323	34125384	.	+	.	nearest_ref "XM_017314621.2"; exon_number "3"; gene_id "13518"; transcript_name "TCONS_00000056"; gene_biotype "protein_coding"; class_code "j"; transcript_id "TCONS_00000056"; gene_name "Dst"; transcript_biotype "protein_coding"
NC_000067.7	Novogene	exon	34153014	34153103	.	+	.	nearest_ref "XM_017314621.2"; exon_number "4"; gene_id "13518"; transcript_name "TCONS_00000056"; gene_biotype "protein_coding"; class_code "j"; transcript_id "TCONS_00000056"; gene_name "Dst"; transcript_biotype "protein_coding"
NC_000067.7	Novogene	exon	34153630	34153722	.	+	.	nearest_ref "XM_017314621.2"; exon_number "5"; gene_id "13518"; transcript_name "TCONS_00000056"; gene_biotype "protein_coding"; class_code "j"; transcript_id "TCONS_00000056"; gene_name "Dst"; transcript_biotype "protein_coding"
NC_000067.7	Novogene	exon	34155199	34155276	.	+	.	nearest_ref "XM_017314621.2"; exon_number "6"; gene_id "13518"; transcript_name "TCONS_00000056"; gene_biotype "protein_coding"; class_code "j"; transcript_id "TCONS_00000056"; gene_name "Dst"; transcript_biotype "protein_coding"
NC_000067.7	Novogene	exon	34156513	34156605	.	+	.	nearest_ref "XM_017314621.2"; exon_number "7"; gene_id "13518"; transcript_name "TCONS_00000056"; gene_biotype "protein_coding"; class_code "j"; transcript_id "TCONS_00000056"; gene_name "Dst"; transcript_biotype "protein_coding"
NC_000067.7	Novogene	exon	34174171	34174337	.	+	.	nearest_ref "XM_017314621.2"; exon_number "8"; gene_id "13518"; transcript_name "TCONS_00000056"; gene_biotype "protein_coding"; class_code "j"; transcript_id "TCONS_00000056"; gene_name "Dst"; transcript_biotype "protein_coding"
NC_000067.7	Novogene	exon	34191283	34191395	.	+	.	nearest_ref "XM_017314621.2"; exon_number "9"; gene_id "13518"; transcript_name "TCONS_00000056"; gene_biotype "protein_coding"; class_code "j"; transcript_id "TCONS_00000056"; gene_name "Dst"; transcript_biotype "protein_coding"
NC_000067.7	Novogene	exon	34191494	34191600	.	+	.	nearest_ref "XM_017314621.2"; exon_number "10"; gene_id "13518"; transcript_name "TCONS_00000056"; gene_biotype "protein_coding"; class_code "j"; transcript_id "TCONS_00000056"; gene_name "Dst"; transcript_biotype "protein_coding"
NC_000067.7	Novogene	exon	34193594	34193713	.	+	.	nearest_ref "XM_017314621.2"; exon_number "11"; gene_id "13518"; transcript_name "TCONS_00000056"; gene_biotype "protein_coding"; class_code "j"; transcript_id "TCONS_00000056"; gene_name "Dst"; transcript_biotype "protein_coding"
NC_000067.7	Novogene	exon	34195680	34195775	.	+	.	nearest_ref "XM_017314621.2"; exon_number "12"; gene_id "13518"; transcript_name "TCONS_00000056"; gene_biotype "protein_coding"; class_code "j"; transcript_id "TCONS_00000056"; gene_name "Dst"; transcript_biotype "protein_coding"
NC_000067.7	Novogene	exon	34195862	34195989	.	+	.	nearest_ref "XM_017314621.2"; exon_number "13"; gene_id "13518"; transcript_name "TCONS_00000056"; gene_biotype "protein_coding"; class_code "j"; transcript_id "TCONS_00000056"; gene_name "Dst"; transcript_biotype "protein_coding"
NC_000067.7	Novogene	exon	34199701	34199794	.	+	.	nearest_ref "XM_017314621.2"; exon_number "14"; gene_id "13518"; transcript_name "TCONS_00000056"; gene_biotype "protein_coding"; class_code "j"; transcript_id "TCONS_00000056"; gene_name "Dst"; transcript_biotype "protein_coding"
NC_000067.7	Novogene	exon	34200085	34200239	.	+	.	nearest_ref "XM_017314621.2"; exon_number "15"; gene_id "13518"; transcript_name "TCONS_00000056"; gene_biotype "protein_coding"; class_code "j"; transcript_id "TCONS_00000056"; gene_name "Dst"; transcript_biotype "protein_coding"
NC_000067.7	Novogene	exon	34202090	34202552	.	+	.	nearest_ref "XM_017314621.2"; exon_number "16"; gene_id "13518"; transcript_name "TCONS_00000056"; gene_biotype "protein_coding"; class_code "j"; transcript_id "TCONS_00000056"; gene_name "Dst"; transcript_biotype "protein_coding"
NC_000067.7	Novogene	exon	34202707	34202835	.	+	.	nearest_ref "XM_017314621.2"; exon_number "17"; gene_id "13518"; transcript_name "TCONS_00000056"; gene_biotype "protein_coding"; class_code "j"; transcript_id "TCONS_00000056"; gene_name "Dst"; transcript_biotype "protein_coding"
NC_000067.7	Novogene	exon	34202978	34203055	.	+	.	nearest_ref "XM_017314621.2"; exon_number "18"; gene_id "13518"; transcript_name "TCONS_00000056"; gene_biotype "protein_coding"; class_code "j"; transcript_id "TCONS_00000056"; gene_name "Dst"; transcript_biotype "protein_coding"
NC_000067.7	Novogene	exon	34203157	34203318	.	+	.	nearest_ref "XM_017314621.2"; exon_number "19"; gene_id "13518"; transcript_name "TCONS_00000056"; gene_biotype "protein_coding"; class_code "j"; transcript_id "TCONS_00000056"; gene_name "Dst"; transcript_biotype "protein_coding"
NC_000067.7	Novogene	exon	34203408	34203512	.	+	.	nearest_ref "XM_017314621.2"; exon_number "20"; gene_id "13518"; transcript_name "TCONS_00000056"; gene_biotype "protein_coding"; class_code "j"; transcript_id "TCONS_00000056"; gene_name "Dst"; transcript_biotype "protein_coding"
NC_000067.7	Novogene	exon	34204139	34204234	.	+	.	nearest_ref "XM_017314621.2"; exon_number "21"; gene_id "13518"; transcript_name "TCONS_00000056"; gene_biotype "protein_coding"; class_code "j"; transcript_id "TCONS_00000056"; gene_name "Dst"; transcript_biotype "protein_coding"
NC_000067.7	Novogene	exon	34205261	34205386	.	+	.	nearest_ref "XM_017314621.2"; exon_number "22"; gene_id "13518"; transcript_name "TCONS_00000056"; gene_biotype "protein_coding"; class_code "j"; transcript_id "TCONS_00000056"; gene_name "Dst"; transcript_biotype "protein_coding"
NC_000067.7	Novogene	exon	34206020	34206172	.	+	.	nearest_ref "XM_017314621.2"; exon_number "23"; gene_id "13518"; transcript_name "TCONS_00000056"; gene_biotype "protein_coding"; class_code "j"; transcript_id "TCONS_00000056"; gene_name "Dst"; transcript_biotype "protein_coding"
NC_000067.7	Novogene	exon	34206357	34206511	.	+	.	nearest_ref "XM_017314621.2"; exon_number "24"; gene_id "13518"; transcript_name "TCONS_00000056"; gene_biotype "protein_coding"; class_code "j"; transcript_id "TCONS_00000056"; gene_name "Dst"; transcript_biotype "protein_coding"
NC_000067.7	Novogene	exon	34206692	34206818	.	+	.	nearest_ref "XM_017314621.2"; exon_number "25"; gene_id "13518"; transcript_name "TCONS_00000056"; gene_biotype "protein_coding"; class_code "j"; transcript_id "TCONS_00000056"; gene_name "Dst"; transcript_biotype "protein_coding"
NC_000067.7	Novogene	exon	34206904	34207087	.	+	.	nearest_ref "XM_017314621.2"; exon_number "26"; gene_id "13518"; transcript_name "TCONS_00000056"; gene_biotype "protein_coding"; class_code "j"; transcript_id "TCONS_00000056"; gene_name "Dst"; transcript_biotype "protein_coding"
NC_000067.7	Novogene	exon	34208245	34208402	.	+	.	nearest_ref "XM_017314621.2"; exon_number "27"; gene_id "13518"; transcript_name "TCONS_00000056"; gene_biotype "protein_coding"; class_code "j"; transcript_id "TCONS_00000056"; gene_name "Dst"; transcript_biotype "protein_coding"
NC_000067.7	Novogene	exon	34208831	34209009	.	+	.	nearest_ref "XM_017314621.2"; exon_number "28"; gene_id "13518"; transcript_name "TCONS_00000056"; gene_biotype "protein_coding"; class_code "j"; transcript_id "TCONS_00000056"; gene_name "Dst"; transcript_biotype "protein_coding"
NC_000067.7	Novogene	exon	34209441	34209579	.	+	.	nearest_ref "XM_017314621.2"; exon_number "29"; gene_id "13518"; transcript_name "TCONS_00000056"; gene_biotype "protein_coding"; class_code "j"; transcript_id "TCONS_00000056"; gene_name "Dst"; transcript_biotype "protein_coding"
NC_000067.7	Novogene	exon	34210197	34210390	.	+	.	nearest_ref "XM_017314621.2"; exon_number "30"; gene_id "13518"; transcript_name "TCONS_00000056"; gene_biotype "protein_coding"; class_code "j"; transcript_id "TCONS_00000056"; gene_name "Dst"; transcript_biotype "protein_coding"
NC_000067.7	Novogene	exon	34211264	34211426	.	+	.	nearest_ref "XM_017314621.2"; exon_number "31"; gene_id "13518"; transcript_name "TCONS_00000056"; gene_biotype "protein_coding"; class_code "j"; transcript_id "TCONS_00000056"; gene_name "Dst"; transcript_biotype "protein_coding"
NC_000067.7	Novogene	exon	34212083	34212166	.	+	.	nearest_ref "XM_017314621.2"; exon_number "32"; gene_id "13518"; transcript_name "TCONS_00000056"; gene_biotype "protein_coding"; class_code "j"; transcript_id "TCONS_00000056"; gene_name "Dst"; transcript_biotype "protein_coding"
NC_000067.7	Novogene	exon	34213196	34213303	.	+	.	nearest_ref "XM_017314621.2"; exon_number "33"; gene_id "13518"; transcript_name "TCONS_00000056"; gene_biotype "protein_coding"; class_code "j"; transcript_id "TCONS_00000056"; gene_name "Dst"; transcript_biotype "protein_coding"
NC_000067.7	Novogene	exon	34213778	34213876	.	+	.	nearest_ref "XM_017314621.2"; exon_number "34"; gene_id "13518"; transcript_name "TCONS_00000056"; gene_biotype "protein_coding"; class_code "j"; transcript_id "TCONS_00000056"; gene_name "Dst"; transcript_biotype "protein_coding"
NC_000067.7	Novogene	exon	34223097	34223225	.	+	.	nearest_ref "XM_017314621.2"; exon_number "35"; gene_id "13518"; transcript_name "TCONS_00000056"; gene_biotype "protein_coding"; class_code "j"; transcript_id "TCONS_00000056"; gene_name "Dst"; transcript_biotype "protein_coding"
NC_000067.7	Novogene	exon	34225043	34225131	.	+	.	nearest_ref "XM_017314621.2"; exon_number "36"; gene_id "13518"; transcript_name "TCONS_00000056"; gene_biotype "protein_coding"; class_code "j"; transcript_id "TCONS_00000056"; gene_name "Dst"; transcript_biotype "protein_coding"
NC_000067.7	Novogene	exon	34225900	34226032	.	+	.	nearest_ref "XM_017314621.2"; exon_number "37"; gene_id "13518"; transcript_name "TCONS_00000056"; gene_biotype "protein_coding"; class_code "j"; transcript_id "TCONS_00000056"; gene_name "Dst"; transcript_biotype "protein_coding"
NC_000067.7	Novogene	exon	34227053	34232344	.	+	.	nearest_ref "XM_017314621.2"; exon_number "38"; gene_id "13518"; transcript_name "TCONS_00000056"; gene_biotype "protein_coding"; class_code "j"; transcript_id "TCONS_00000056"; gene_name "Dst"; transcript_biotype "protein_coding"
NC_000067.7	Novogene	exon	34232473	34232622	.	+	.	nearest_ref "XM_017314621.2"; exon_number "39"; gene_id "13518"; transcript_name "TCONS_00000056"; gene_biotype "protein_coding"; class_code "j"; transcript_id "TCONS_00000056"; gene_name "Dst"; transcript_biotype "protein_coding"
NC_000067.7	Novogene	exon	34233086	34233301	.	+	.	nearest_ref "XM_017314621.2"; exon_number "40"; gene_id "13518"; transcript_name "TCONS_00000056"; gene_biotype "protein_coding"; class_code "j"; transcript_id "TCONS_00000056"; gene_name "Dst"; transcript_biotype "protein_coding"
NC_000067.7	Novogene	exon	34233596	34233745	.	+	.	nearest_ref "XM_017314621.2"; exon_number "41"; gene_id "13518"; transcript_name "TCONS_00000056"; gene_biotype "protein_coding"; class_code "j"; transcript_id "TCONS_00000056"; gene_name "Dst"; transcript_biotype "protein_coding"
NC_000067.7	Novogene	exon	34234909	34235142	.	+	.	nearest_ref "XM_017314621.2"; exon_number "42"; gene_id "13518"; transcript_name "TCONS_00000056"; gene_biotype "protein_coding"; class_code "j"; transcript_id "TCONS_00000056"; gene_name "Dst"; transcript_biotype "protein_coding"
NC_000067.7	Novogene	exon	34236282	34236434	.	+	.	nearest_ref "XM_017314621.2"; exon_number "43"; gene_id "13518"; transcript_name "TCONS_00000056"; gene_biotype "protein_coding"; class_code "j"; transcript_id "TCONS_00000056"; gene_name "Dst"; transcript_biotype "protein_coding"
NC_000067.7	Novogene	exon	34237599	34237832	.	+	.	nearest_ref "XM_017314621.2"; exon_number "44"; gene_id "13518"; transcript_name "TCONS_00000056"; gene_biotype "protein_coding"; class_code "j"; transcript_id "TCONS_00000056"; gene_name "Dst"; transcript_biotype "protein_coding"
NC_000067.7	Novogene	exon	34238373	34238639	.	+	.	nearest_ref "XM_017314621.2"; exon_number "45"; gene_id "13518"; transcript_name "TCONS_00000056"; gene_biotype "protein_coding"; class_code "j"; transcript_id "TCONS_00000056"; gene_name "Dst"; transcript_biotype "protein_coding"
NC_000067.7	Novogene	exon	34239951	34240496	.	+	.	nearest_ref "XM_017314621.2"; exon_number "46"; gene_id "13518"; transcript_name "TCONS_00000056"; gene_biotype "protein_coding"; class_code "j"; transcript_id "TCONS_00000056"; gene_name "Dst"; transcript_biotype "protein_coding"
NC_000067.7	Novogene	exon	34241526	34241702	.	+	.	nearest_ref "XM_017314621.2"; exon_number "47"; gene_id "13518"; transcript_name "TCONS_00000056"; gene_biotype "protein_coding"; class_code "j"; transcript_id "TCONS_00000056"; gene_name "Dst"; transcript_biotype "protein_coding"
NC_000067.7	Novogene	exon	34247635	34247758	.	+	.	nearest_ref "XM_017314621.2"; exon_number "48"; gene_id "13518"; transcript_name "TCONS_00000056"; gene_biotype "protein_coding"; class_code "j"; transcript_id "TCONS_00000056"; gene_name "Dst"; transcript_biotype "protein_coding"
NC_000067.7	Novogene	exon	34250235	34250443	.	+	.	nearest_ref "XM_017314621.2"; exon_number "49"; gene_id "13518"; transcript_name "TCONS_00000056"; gene_biotype "protein_coding"; class_code "j"; transcript_id "TCONS_00000056"; gene_name "Dst"; transcript_biotype "protein_coding"
NC_000067.7	Novogene	exon	34251303	34251620	.	+	.	nearest_ref "XM_017314621.2"; exon_number "50"; gene_id "13518"; transcript_name "TCONS_00000056"; gene_biotype "protein_coding"; class_code "j"; transcript_id "TCONS_00000056"; gene_name "Dst"; transcript_biotype "protein_coding"
NC_000067.7	Novogene	exon	34251983	34252149	.	+	.	nearest_ref "XM_017314621.2"; exon_number "51"; gene_id "13518"; transcript_name "TCONS_00000056"; gene_biotype "protein_coding"; class_code "j"; transcript_id "TCONS_00000056"; gene_name "Dst"; transcript_biotype "protein_coding"
NC_000067.7	Novogene	exon	34253615	34253771	.	+	.	nearest_ref "XM_017314621.2"; exon_number "52"; gene_id "13518"; transcript_name "TCONS_00000056"; gene_biotype "protein_coding"; class_code "j"; transcript_id "TCONS_00000056"; gene_name "Dst"; transcript_biotype "protein_coding"
NC_000067.7	Novogene	exon	34254567	34254693	.	+	.	nearest_ref "XM_017314621.2"; exon_number "53"; gene_id "13518"; transcript_name "TCONS_00000056"; gene_biotype "protein_coding"; class_code "j"; transcript_id "TCONS_00000056"; gene_name "Dst"; transcript_biotype "protein_coding"
NC_000067.7	Novogene	exon	34256891	34256953	.	+	.	nearest_ref "XM_017314621.2"; exon_number "54"; gene_id "13518"; transcript_name "TCONS_00000056"; gene_biotype "protein_coding"; class_code "j"; transcript_id "TCONS_00000056"; gene_name "Dst"; transcript_biotype "protein_coding"
NC_000067.7	Novogene	exon	34257416	34257657	.	+	.	nearest_ref "XM_017314621.2"; exon_number "55"; gene_id "13518"; transcript_name "TCONS_00000056"; gene_biotype "protein_coding"; class_code "j"; transcript_id "TCONS_00000056"; gene_name "Dst"; transcript_biotype "protein_coding"
NC_000067.7	Novogene	exon	34258477	34258606	.	+	.	nearest_ref "XM_017314621.2"; exon_number "56"; gene_id "13518"; transcript_name "TCONS_00000056"; gene_biotype "protein_coding"; class_code "j"; transcript_id "TCONS_00000056"; gene_name "Dst"; transcript_biotype "protein_coding"
NC_000067.7	Novogene	exon	34262885	34263084	.	+	.	nearest_ref "XM_017314621.2"; exon_number "57"; gene_id "13518"; transcript_name "TCONS_00000056"; gene_biotype "protein_coding"; class_code "j"; transcript_id "TCONS_00000056"; gene_name "Dst"; transcript_biotype "protein_coding"
NC_000067.7	Novogene	exon	34264590	34265085	.	+	.	nearest_ref "XM_017314621.2"; exon_number "58"; gene_id "13518"; transcript_name "TCONS_00000056"; gene_biotype "protein_coding"; class_code "j"; transcript_id "TCONS_00000056"; gene_name "Dst"; transcript_biotype "protein_coding"
NC_000067.7	Novogene	exon	34266856	34268327	.	+	.	nearest_ref "XM_017314621.2"; exon_number "59"; gene_id "13518"; transcript_name "TCONS_00000056"; gene_biotype "protein_coding"; class_code "j"; transcript_id "TCONS_00000056"; gene_name "Dst"; transcript_biotype "protein_coding"
NC_000067.7	Novogene	exon	34281700	34281861	.	+	.	nearest_ref "XM_017314621.2"; exon_number "60"; gene_id "13518"; transcript_name "TCONS_00000056"; gene_biotype "protein_coding"; class_code "j"; transcript_id "TCONS_00000056"; gene_name "Dst"; transcript_biotype "protein_coding"
NC_000067.7	Novogene	exon	34283425	34283595	.	+	.	nearest_ref "XM_017314621.2"; exon_number "61"; gene_id "13518"; transcript_name "TCONS_00000056"; gene_biotype "protein_coding"; class_code "j"; transcript_id "TCONS_00000056"; gene_name "Dst"; transcript_biotype "protein_coding"
NC_000067.7	Novogene	exon	34286730	34286896	.	+	.	nearest_ref "XM_017314621.2"; exon_number "62"; gene_id "13518"; transcript_name "TCONS_00000056"; gene_biotype "protein_coding"; class_code "j"; transcript_id "TCONS_00000056"; gene_name "Dst"; transcript_biotype "protein_coding"
NC_000067.7	Novogene	exon	34288560	34288719	.	+	.	nearest_ref "XM_017314621.2"; exon_number "63"; gene_id "13518"; transcript_name "TCONS_00000056"; gene_biotype "protein_coding"; class_code "j"; transcript_id "TCONS_00000056"; gene_name "Dst"; transcript_biotype "protein_coding"
NC_000067.7	Novogene	exon	34288885	34289211	.	+	.	nearest_ref "XM_017314621.2"; exon_number "64"; gene_id "13518"; transcript_name "TCONS_00000056"; gene_biotype "protein_coding"; class_code "j"; transcript_id "TCONS_00000056"; gene_name "Dst"; transcript_biotype "protein_coding"
NC_000067.7	Novogene	exon	34289691	34289775	.	+	.	nearest_ref "XM_017314621.2"; exon_number "65"; gene_id "13518"; transcript_name "TCONS_00000056"; gene_biotype "protein_coding"; class_code "j"; transcript_id "TCONS_00000056"; gene_name "Dst"; transcript_biotype "protein_coding"
NC_000067.7	Novogene	exon	34290777	34291018	.	+	.	nearest_ref "XM_017314621.2"; exon_number "66"; gene_id "13518"; transcript_name "TCONS_00000056"; gene_biotype "protein_coding"; class_code "j"; transcript_id "TCONS_00000056"; gene_name "Dst"; transcript_biotype "protein_coding"
NC_000067.7	Novogene	exon	34291892	34292098	.	+	.	nearest_ref "XM_017314621.2"; exon_number "67"; gene_id "13518"; transcript_name "TCONS_00000056"; gene_biotype "protein_coding"; class_code "j"; transcript_id "TCONS_00000056"; gene_name "Dst"; transcript_biotype "protein_coding"
NC_000067.7	Novogene	exon	34295313	34295432	.	+	.	nearest_ref "XM_017314621.2"; exon_number "68"; gene_id "13518"; transcript_name "TCONS_00000056"; gene_biotype "protein_coding"; class_code "j"; transcript_id "TCONS_00000056"; gene_name "Dst"; transcript_biotype "protein_coding"
NC_000067.7	Novogene	exon	34295623	34295730	.	+	.	nearest_ref "XM_017314621.2"; exon_number "69"; gene_id "13518"; transcript_name "TCONS_00000056"; gene_biotype "protein_coding"; class_code "j"; transcript_id "TCONS_00000056"; gene_name "Dst"; transcript_biotype "protein_coding"
NC_000067.7	Novogene	exon	34296803	34297021	.	+	.	nearest_ref "XM_017314621.2"; exon_number "70"; gene_id "13518"; transcript_name "TCONS_00000056"; gene_biotype "protein_coding"; class_code "j"; transcript_id "TCONS_00000056"; gene_name "Dst"; transcript_biotype "protein_coding"
NC_000067.7	Novogene	exon	34299245	34299448	.	+	.	nearest_ref "XM_017314621.2"; exon_number "71"; gene_id "13518"; transcript_name "TCONS_00000056"; gene_biotype "protein_coding"; class_code "j"; transcript_id "TCONS_00000056"; gene_name "Dst"; transcript_biotype "protein_coding"
NC_000067.7	Novogene	exon	34301101	34301332	.	+	.	nearest_ref "XM_017314621.2"; exon_number "72"; gene_id "13518"; transcript_name "TCONS_00000056"; gene_biotype "protein_coding"; class_code "j"; transcript_id "TCONS_00000056"; gene_name "Dst"; transcript_biotype "protein_coding"
NC_000067.7	Novogene	exon	34302345	34302571	.	+	.	nearest_ref "XM_017314621.2"; exon_number "73"; gene_id "13518"; transcript_name "TCONS_00000056"; gene_biotype "protein_coding"; class_code "j"; transcript_id "TCONS_00000056"; gene_name "Dst"; transcript_biotype "protein_coding"
NC_000067.7	Novogene	exon	34303606	34303728	.	+	.	nearest_ref "XM_017314621.2"; exon_number "74"; gene_id "13518"; transcript_name "TCONS_00000056"; gene_biotype "protein_coding"; class_code "j"; transcript_id "TCONS_00000056"; gene_name "Dst"; transcript_biotype "protein_coding"
NC_000067.7	Novogene	exon	34303831	34303932	.	+	.	nearest_ref "XM_017314621.2"; exon_number "75"; gene_id "13518"; transcript_name "TCONS_00000056"; gene_biotype "protein_coding"; class_code "j"; transcript_id "TCONS_00000056"; gene_name "Dst"; transcript_biotype "protein_coding"
NC_000067.7	Novogene	exon	34305938	34306039	.	+	.	nearest_ref "XM_017314621.2"; exon_number "76"; gene_id "13518"; transcript_name "TCONS_00000056"; gene_biotype "protein_coding"; class_code "j"; transcript_id "TCONS_00000056"; gene_name "Dst"; transcript_biotype "protein_coding"
NC_000067.7	Novogene	exon	34307310	34307483	.	+	.	nearest_ref "XM_017314621.2"; exon_number "77"; gene_id "13518"; transcript_name "TCONS_00000056"; gene_biotype "protein_coding"; class_code "j"; transcript_id "TCONS_00000056"; gene_name "Dst"; transcript_biotype "protein_coding"
NC_000067.7	Novogene	exon	34307816	34307971	.	+	.	nearest_ref "XM_017314621.2"; exon_number "78"; gene_id "13518"; transcript_name "TCONS_00000056"; gene_biotype "protein_coding"; class_code "j"; transcript_id "TCONS_00000056"; gene_name "Dst"; transcript_biotype "protein_coding"
NC_000067.7	Novogene	exon	34309909	34310106	.	+	.	nearest_ref "XM_017314621.2"; exon_number "79"; gene_id "13518"; transcript_name "TCONS_00000056"; gene_biotype "protein_coding"; class_code "j"; transcript_id "TCONS_00000056"; gene_name "Dst"; transcript_biotype "protein_coding"
NC_000067.7	Novogene	exon	34310436	34310564	.	+	.	nearest_ref "XM_017314621.2"; exon_number "80"; gene_id "13518"; transcript_name "TCONS_00000056"; gene_biotype "protein_coding"; class_code "j"; transcript_id "TCONS_00000056"; gene_name "Dst"; transcript_biotype "protein_coding"
NC_000067.7	Novogene	exon	34313249	34313419	.	+	.	nearest_ref "XM_017314621.2"; exon_number "81"; gene_id "13518"; transcript_name "TCONS_00000056"; gene_biotype "protein_coding"; class_code "j"; transcript_id "TCONS_00000056"; gene_name "Dst"; transcript_biotype "protein_coding"
NC_000067.7	Novogene	exon	34314286	34314441	.	+	.	nearest_ref "XM_017314621.2"; exon_number "82"; gene_id "13518"; transcript_name "TCONS_00000056"; gene_biotype "protein_coding"; class_code "j"; transcript_id "TCONS_00000056"; gene_name "Dst"; transcript_biotype "protein_coding"
NC_000067.7	Novogene	exon	34314754	34314960	.	+	.	nearest_ref "XM_017314621.2"; exon_number "83"; gene_id "13518"; transcript_name "TCONS_00000056"; gene_biotype "protein_coding"; class_code "j"; transcript_id "TCONS_00000056"; gene_name "Dst"; transcript_biotype "protein_coding"
NC_000067.7	Novogene	exon	34317101	34317220	.	+	.	nearest_ref "XM_017314621.2"; exon_number "84"; gene_id "13518"; transcript_name "TCONS_00000056"; gene_biotype "protein_coding"; class_code "j"; transcript_id "TCONS_00000056"; gene_name "Dst"; transcript_biotype "protein_coding"
NC_000067.7	Novogene	exon	34321504	34321673	.	+	.	nearest_ref "XM_017314621.2"; exon_number "85"; gene_id "13518"; transcript_name "TCONS_00000056"; gene_biotype "protein_coding"; class_code "j"; transcript_id "TCONS_00000056"; gene_name "Dst"; transcript_biotype "protein_coding"
NC_000067.7	Novogene	exon	34323340	34323499	.	+	.	nearest_ref "XM_017314621.2"; exon_number "86"; gene_id "13518"; transcript_name "TCONS_00000056"; gene_biotype "protein_coding"; class_code "j"; transcript_id "TCONS_00000056"; gene_name "Dst"; transcript_biotype "protein_coding"
NC_000067.7	Novogene	exon	34326268	34326462	.	+	.	nearest_ref "XM_017314621.2"; exon_number "87"; gene_id "13518"; transcript_name "TCONS_00000056"; gene_biotype "protein_coding"; class_code "j"; transcript_id "TCONS_00000056"; gene_name "Dst"; transcript_biotype "protein_coding"
NC_000067.7	Novogene	exon	34326972	34327100	.	+	.	nearest_ref "XM_017314621.2"; exon_number "88"; gene_id "13518"; transcript_name "TCONS_00000056"; gene_biotype "protein_coding"; class_code "j"; transcript_id "TCONS_00000056"; gene_name "Dst"; transcript_biotype "protein_coding"
NC_000067.7	Novogene	exon	34328605	34328748	.	+	.	nearest_ref "XM_017314621.2"; exon_number "89"; gene_id "13518"; transcript_name "TCONS_00000056"; gene_biotype "protein_coding"; class_code "j"; transcript_id "TCONS_00000056"; gene_name "Dst"; transcript_biotype "protein_coding"
NC_000067.7	Novogene	exon	34329440	34329628	.	+	.	nearest_ref "XM_017314621.2"; exon_number "90"; gene_id "13518"; transcript_name "TCONS_00000056"; gene_biotype "protein_coding"; class_code "j"; transcript_id "TCONS_00000056"; gene_name "Dst"; transcript_biotype "protein_coding"
NC_000067.7	Novogene	exon	34330868	34330997	.	+	.	nearest_ref "XM_017314621.2"; exon_number "91"; gene_id "13518"; transcript_name "TCONS_00000056"; gene_biotype "protein_coding"; class_code "j"; transcript_id "TCONS_00000056"; gene_name "Dst"; transcript_biotype "protein_coding"
NC_000067.7	Novogene	exon	34332401	34332564	.	+	.	nearest_ref "XM_017314621.2"; exon_number "92"; gene_id "13518"; transcript_name "TCONS_00000056"; gene_biotype "protein_coding"; class_code "j"; transcript_id "TCONS_00000056"; gene_name "Dst"; transcript_biotype "protein_coding"
NC_000067.7	Novogene	exon	34333465	34333627	.	+	.	nearest_ref "XM_017314621.2"; exon_number "93"; gene_id "13518"; transcript_name "TCONS_00000056"; gene_biotype "protein_coding"; class_code "j"; transcript_id "TCONS_00000056"; gene_name "Dst"; transcript_biotype "protein_coding"
NC_000067.7	Novogene	exon	34334235	34334389	.	+	.	nearest_ref "XM_017314621.2"; exon_number "94"; gene_id "13518"; transcript_name "TCONS_00000056"; gene_biotype "protein_coding"; class_code "j"; transcript_id "TCONS_00000056"; gene_name "Dst"; transcript_biotype "protein_coding"
NC_000067.7	Novogene	exon	34334543	34334617	.	+	.	nearest_ref "XM_017314621.2"; exon_number "95"; gene_id "13518"; transcript_name "TCONS_00000056"; gene_biotype "protein_coding"; class_code "j"; transcript_id "TCONS_00000056"; gene_name "Dst"; transcript_biotype "protein_coding"
NC_000067.7	Novogene	exon	34335823	34335840	.	+	.	nearest_ref "XM_017314621.2"; exon_number "96"; gene_id "13518"; transcript_name "TCONS_00000056"; gene_biotype "protein_coding"; class_code "j"; transcript_id "TCONS_00000056"; gene_name "Dst"; transcript_biotype "protein_coding"
NC_000067.7	Novogene	exon	34338802	34338919	.	+	.	nearest_ref "XM_017314621.2"; exon_number "97"; gene_id "13518"; transcript_name "TCONS_00000056"; gene_biotype "protein_coding"; class_code "j"; transcript_id "TCONS_00000056"; gene_name "Dst"; transcript_biotype "protein_coding"
NC_000067.7	Novogene	exon	34340942	34341013	.	+	.	nearest_ref "XM_017314621.2"; exon_number "98"; gene_id "13518"; transcript_name "TCONS_00000056"; gene_biotype "protein_coding"; class_code "j"; transcript_id "TCONS_00000056"; gene_name "Dst"; transcript_biotype "protein_coding"
NC_000067.7	Novogene	exon	34341911	34342113	.	+	.	nearest_ref "XM_017314621.2"; exon_number "99"; gene_id "13518"; transcript_name "TCONS_00000056"; gene_biotype "protein_coding"; class_code "j"; transcript_id "TCONS_00000056"; gene_name "Dst"; transcript_biotype "protein_coding"
NC_000067.7	Novogene	exon	34342502	34342612	.	+	.	nearest_ref "XM_017314621.2"; exon_number "100"; gene_id "13518"; transcript_name "TCONS_00000056"; gene_biotype "protein_coding"; class_code "j"; transcript_id "TCONS_00000056"; gene_name "Dst"; transcript_biotype "protein_coding"
NC_000067.7	Novogene	exon	34345609	34345732	.	+	.	nearest_ref "XM_017314621.2"; exon_number "101"; gene_id "13518"; transcript_name "TCONS_00000056"; gene_biotype "protein_coding"; class_code "j"; transcript_id "TCONS_00000056"; gene_name "Dst"; transcript_biotype "protein_coding"
NC_000067.7	Novogene	exon	34346411	34347733	.	+	.	nearest_ref "XM_017314621.2"; exon_number "102"; gene_id "13518"; transcript_name "TCONS_00000056"; gene_biotype "protein_coding"; class_code "j"; transcript_id "TCONS_00000056"; gene_name "Dst"; transcript_biotype "protein_coding"
NC_000067.7	Novogene	exon	34044990	34045089	.	+	.	nearest_ref "XM_017314621.2"; exon_number "1"; gene_id "13518"; transcript_name "TCONS_00000057"; gene_biotype "protein_coding"; class_code "j"; transcript_id "TCONS_00000057"; gene_name "Dst"; transcript_biotype "protein_coding"
NC_000067.7	Novogene	exon	34045272	34045479	.	+	.	nearest_ref "XM_017314621.2"; exon_number "2"; gene_id "13518"; transcript_name "TCONS_00000057"; gene_biotype "protein_coding"; class_code "j"; transcript_id "TCONS_00000057"; gene_name "Dst"; transcript_biotype "protein_coding"
NC_000067.7	Novogene	exon	34125323	34125384	.	+	.	nearest_ref "XM_017314621.2"; exon_number "3"; gene_id "13518"; transcript_name "TCONS_00000057"; gene_biotype "protein_coding"; class_code "j"; transcript_id "TCONS_00000057"; gene_name "Dst"; transcript_biotype "protein_coding"
NC_000067.7	Novogene	exon	34153014	34153103	.	+	.	nearest_ref "XM_017314621.2"; exon_number "4"; gene_id "13518"; transcript_name "TCONS_00000057"; gene_biotype "protein_coding"; class_code "j"; transcript_id "TCONS_00000057"; gene_name "Dst"; transcript_biotype "protein_coding"
NC_000067.7	Novogene	exon	34155199	34155276	.	+	.	nearest_ref "XM_017314621.2"; exon_number "5"; gene_id "13518"; transcript_name "TCONS_00000057"; gene_biotype "protein_coding"; class_code "j"; transcript_id "TCONS_00000057"; gene_name "Dst"; transcript_biotype "protein_coding"
NC_000067.7	Novogene	exon	34156513	34156605	.	+	.	nearest_ref "XM_017314621.2"; exon_number "6"; gene_id "13518"; transcript_name "TCONS_00000057"; gene_biotype "protein_coding"; class_code "j"; transcript_id "TCONS_00000057"; gene_name "Dst"; transcript_biotype "protein_coding"
NC_000067.7	Novogene	exon	34174171	34174337	.	+	.	nearest_ref "XM_017314621.2"; exon_number "7"; gene_id "13518"; transcript_name "TCONS_00000057"; gene_biotype "protein_coding"; class_code "j"; transcript_id "TCONS_00000057"; gene_name "Dst"; transcript_biotype "protein_coding"
NC_000067.7	Novogene	exon	34191283	34191395	.	+	.	nearest_ref "XM_017314621.2"; exon_number "8"; gene_id "13518"; transcript_name "TCONS_00000057"; gene_biotype "protein_coding"; class_code "j"; transcript_id "TCONS_00000057"; gene_name "Dst"; transcript_biotype "protein_coding"
NC_000067.7	Novogene	exon	34191494	34191600	.	+	.	nearest_ref "XM_017314621.2"; exon_number "9"; gene_id "13518"; transcript_name "TCONS_00000057"; gene_biotype "protein_coding"; class_code "j"; transcript_id "TCONS_00000057"; gene_name "Dst"; transcript_biotype "protein_coding"
NC_000067.7	Novogene	exon	34193594	34193713	.	+	.	nearest_ref "XM_017314621.2"; exon_number "10"; gene_id "13518"; transcript_name "TCONS_00000057"; gene_biotype "protein_coding"; class_code "j"; transcript_id "TCONS_00000057"; gene_name "Dst"; transcript_biotype "protein_coding"
NC_000067.7	Novogene	exon	34195680	34195775	.	+	.	nearest_ref "XM_017314621.2"; exon_number "11"; gene_id "13518"; transcript_name "TCONS_00000057"; gene_biotype "protein_coding"; class_code "j"; transcript_id "TCONS_00000057"; gene_name "Dst"; transcript_biotype "protein_coding"
NC_000067.7	Novogene	exon	34195862	34195989	.	+	.	nearest_ref "XM_017314621.2"; exon_number "12"; gene_id "13518"; transcript_name "TCONS_00000057"; gene_biotype "protein_coding"; class_code "j"; transcript_id "TCONS_00000057"; gene_name "Dst"; transcript_biotype "protein_coding"
NC_000067.7	Novogene	exon	34199701	34199794	.	+	.	nearest_ref "XM_017314621.2"; exon_number "13"; gene_id "13518"; transcript_name "TCONS_00000057"; gene_biotype "protein_coding"; class_code "j"; transcript_id "TCONS_00000057"; gene_name "Dst"; transcript_biotype "protein_coding"
NC_000067.7	Novogene	exon	34200085	34200239	.	+	.	nearest_ref "XM_017314621.2"; exon_number "14"; gene_id "13518"; transcript_name "TCONS_00000057"; gene_biotype "protein_coding"; class_code "j"; transcript_id "TCONS_00000057"; gene_name "Dst"; transcript_biotype "protein_coding"
NC_000067.7	Novogene	exon	34202090	34202552	.	+	.	nearest_ref "XM_017314621.2"; exon_number "15"; gene_id "13518"; transcript_name "TCONS_00000057"; gene_biotype "protein_coding"; class_code "j"; transcript_id "TCONS_00000057"; gene_name "Dst"; transcript_biotype "protein_coding"
NC_000067.7	Novogene	exon	34202707	34202835	.	+	.	nearest_ref "XM_017314621.2"; exon_number "16"; gene_id "13518"; transcript_name "TCONS_00000057"; gene_biotype "protein_coding"; class_code "j"; transcript_id "TCONS_00000057"; gene_name "Dst"; transcript_biotype "protein_coding"
NC_000067.7	Novogene	exon	34202978	34203055	.	+	.	nearest_ref "XM_017314621.2"; exon_number "17"; gene_id "13518"; transcript_name "TCONS_00000057"; gene_biotype "protein_coding"; class_code "j"; transcript_id "TCONS_00000057"; gene_name "Dst"; transcript_biotype "protein_coding"
NC_000067.7	Novogene	exon	34203157	34203318	.	+	.	nearest_ref "XM_017314621.2"; exon_number "18"; gene_id "13518"; transcript_name "TCONS_00000057"; gene_biotype "protein_coding"; class_code "j"; transcript_id "TCONS_00000057"; gene_name "Dst"; transcript_biotype "protein_coding"
NC_000067.7	Novogene	exon	34203408	34203512	.	+	.	nearest_ref "XM_017314621.2"; exon_number "19"; gene_id "13518"; transcript_name "TCONS_00000057"; gene_biotype "protein_coding"; class_code "j"; transcript_id "TCONS_00000057"; gene_name "Dst"; transcript_biotype "protein_coding"
NC_000067.7	Novogene	exon	34204139	34204234	.	+	.	nearest_ref "XM_017314621.2"; exon_number "20"; gene_id "13518"; transcript_name "TCONS_00000057"; gene_biotype "protein_coding"; class_code "j"; transcript_id "TCONS_00000057"; gene_name "Dst"; transcript_biotype "protein_coding"
NC_000067.7	Novogene	exon	34205261	34205386	.	+	.	nearest_ref "XM_017314621.2"; exon_number "21"; gene_id "13518"; transcript_name "TCONS_00000057"; gene_biotype "protein_coding"; class_code "j"; transcript_id "TCONS_00000057"; gene_name "Dst"; transcript_biotype "protein_coding"
NC_000067.7	Novogene	exon	34206020	34206172	.	+	.	nearest_ref "XM_017314621.2"; exon_number "22"; gene_id "13518"; transcript_name "TCONS_00000057"; gene_biotype "protein_coding"; class_code "j"; transcript_id "TCONS_00000057"; gene_name "Dst"; transcript_biotype "protein_coding"
NC_000067.7	Novogene	exon	34206357	34206511	.	+	.	nearest_ref "XM_017314621.2"; exon_number "23"; gene_id "13518"; transcript_name "TCONS_00000057"; gene_biotype "protein_coding"; class_code "j"; transcript_id "TCONS_00000057"; gene_name "Dst"; transcript_biotype "protein_coding"
NC_000067.7	Novogene	exon	34206692	34206818	.	+	.	nearest_ref "XM_017314621.2"; exon_number "24"; gene_id "13518"; transcript_name "TCONS_00000057"; gene_biotype "protein_coding"; class_code "j"; transcript_id "TCONS_00000057"; gene_name "Dst"; transcript_biotype "protein_coding"
NC_000067.7	Novogene	exon	34206904	34207087	.	+	.	nearest_ref "XM_017314621.2"; exon_number "25"; gene_id "13518"; transcript_name "TCONS_00000057"; gene_biotype "protein_coding"; class_code "j"; transcript_id "TCONS_00000057"; gene_name "Dst"; transcript_biotype "protein_coding"
NC_000067.7	Novogene	exon	34208245	34208402	.	+	.	nearest_ref "XM_017314621.2"; exon_number "26"; gene_id "13518"; transcript_name "TCONS_00000057"; gene_biotype "protein_coding"; class_code "j"; transcript_id "TCONS_00000057"; gene_name "Dst"; transcript_biotype "protein_coding"
NC_000067.7	Novogene	exon	34208831	34209009	.	+	.	nearest_ref "XM_017314621.2"; exon_number "27"; gene_id "13518"; transcript_name "TCONS_00000057"; gene_biotype "protein_coding"; class_code "j"; transcript_id "TCONS_00000057"; gene_name "Dst"; transcript_biotype "protein_coding"
NC_000067.7	Novogene	exon	34209441	34209579	.	+	.	nearest_ref "XM_017314621.2"; exon_number "28"; gene_id "13518"; transcript_name "TCONS_00000057"; gene_biotype "protein_coding"; class_code "j"; transcript_id "TCONS_00000057"; gene_name "Dst"; transcript_biotype "protein_coding"
NC_000067.7	Novogene	exon	34210197	34210390	.	+	.	nearest_ref "XM_017314621.2"; exon_number "29"; gene_id "13518"; transcript_name "TCONS_00000057"; gene_biotype "protein_coding"; class_code "j"; transcript_id "TCONS_00000057"; gene_name "Dst"; transcript_biotype "protein_coding"
NC_000067.7	Novogene	exon	34211264	34211426	.	+	.	nearest_ref "XM_017314621.2"; exon_number "30"; gene_id "13518"; transcript_name "TCONS_00000057"; gene_biotype "protein_coding"; class_code "j"; transcript_id "TCONS_00000057"; gene_name "Dst"; transcript_biotype "protein_coding"
NC_000067.7	Novogene	exon	34212083	34212166	.	+	.	nearest_ref "XM_017314621.2"; exon_number "31"; gene_id "13518"; transcript_name "TCONS_00000057"; gene_biotype "protein_coding"; class_code "j"; transcript_id "TCONS_00000057"; gene_name "Dst"; transcript_biotype "protein_coding"
NC_000067.7	Novogene	exon	34213196	34213303	.	+	.	nearest_ref "XM_017314621.2"; exon_number "32"; gene_id "13518"; transcript_name "TCONS_00000057"; gene_biotype "protein_coding"; class_code "j"; transcript_id "TCONS_00000057"; gene_name "Dst"; transcript_biotype "protein_coding"
NC_000067.7	Novogene	exon	34213778	34213876	.	+	.	nearest_ref "XM_017314621.2"; exon_number "33"; gene_id "13518"; transcript_name "TCONS_00000057"; gene_biotype "protein_coding"; class_code "j"; transcript_id "TCONS_00000057"; gene_name "Dst"; transcript_biotype "protein_coding"
NC_000067.7	Novogene	exon	34223097	34223225	.	+	.	nearest_ref "XM_017314621.2"; exon_number "34"; gene_id "13518"; transcript_name "TCONS_00000057"; gene_biotype "protein_coding"; class_code "j"; transcript_id "TCONS_00000057"; gene_name "Dst"; transcript_biotype "protein_coding"
NC_000067.7	Novogene	exon	34225043	34225131	.	+	.	nearest_ref "XM_017314621.2"; exon_number "35"; gene_id "13518"; transcript_name "TCONS_00000057"; gene_biotype "protein_coding"; class_code "j"; transcript_id "TCONS_00000057"; gene_name "Dst"; transcript_biotype "protein_coding"
NC_000067.7	Novogene	exon	34225900	34226032	.	+	.	nearest_ref "XM_017314621.2"; exon_number "36"; gene_id "13518"; transcript_name "TCONS_00000057"; gene_biotype "protein_coding"; class_code "j"; transcript_id "TCONS_00000057"; gene_name "Dst"; transcript_biotype "protein_coding"
NC_000067.7	Novogene	exon	34227053	34232344	.	+	.	nearest_ref "XM_017314621.2"; exon_number "37"; gene_id "13518"; transcript_name "TCONS_00000057"; gene_biotype "protein_coding"; class_code "j"; transcript_id "TCONS_00000057"; gene_name "Dst"; transcript_biotype "protein_coding"
NC_000067.7	Novogene	exon	34232473	34232622	.	+	.	nearest_ref "XM_017314621.2"; exon_number "38"; gene_id "13518"; transcript_name "TCONS_00000057"; gene_biotype "protein_coding"; class_code "j"; transcript_id "TCONS_00000057"; gene_name "Dst"; transcript_biotype "protein_coding"
NC_000067.7	Novogene	exon	34233086	34233301	.	+	.	nearest_ref "XM_017314621.2"; exon_number "39"; gene_id "13518"; transcript_name "TCONS_00000057"; gene_biotype "protein_coding"; class_code "j"; transcript_id "TCONS_00000057"; gene_name "Dst"; transcript_biotype "protein_coding"
NC_000067.7	Novogene	exon	34233596	34233745	.	+	.	nearest_ref "XM_017314621.2"; exon_number "40"; gene_id "13518"; transcript_name "TCONS_00000057"; gene_biotype "protein_coding"; class_code "j"; transcript_id "TCONS_00000057"; gene_name "Dst"; transcript_biotype "protein_coding"
NC_000067.7	Novogene	exon	34234909	34235142	.	+	.	nearest_ref "XM_017314621.2"; exon_number "41"; gene_id "13518"; transcript_name "TCONS_00000057"; gene_biotype "protein_coding"; class_code "j"; transcript_id "TCONS_00000057"; gene_name "Dst"; transcript_biotype "protein_coding"
NC_000067.7	Novogene	exon	34236282	34236434	.	+	.	nearest_ref "XM_017314621.2"; exon_number "42"; gene_id "13518"; transcript_name "TCONS_00000057"; gene_biotype "protein_coding"; class_code "j"; transcript_id "TCONS_00000057"; gene_name "Dst"; transcript_biotype "protein_coding"
NC_000067.7	Novogene	exon	34237599	34237832	.	+	.	nearest_ref "XM_017314621.2"; exon_number "43"; gene_id "13518"; transcript_name "TCONS_00000057"; gene_biotype "protein_coding"; class_code "j"; transcript_id "TCONS_00000057"; gene_name "Dst"; transcript_biotype "protein_coding"
NC_000067.7	Novogene	exon	34238373	34238639	.	+	.	nearest_ref "XM_017314621.2"; exon_number "44"; gene_id "13518"; transcript_name "TCONS_00000057"; gene_biotype "protein_coding"; class_code "j"; transcript_id "TCONS_00000057"; gene_name "Dst"; transcript_biotype "protein_coding"
NC_000067.7	Novogene	exon	34239951	34240496	.	+	.	nearest_ref "XM_017314621.2"; exon_number "45"; gene_id "13518"; transcript_name "TCONS_00000057"; gene_biotype "protein_coding"; class_code "j"; transcript_id "TCONS_00000057"; gene_name "Dst"; transcript_biotype "protein_coding"
NC_000067.7	Novogene	exon	34241526	34241702	.	+	.	nearest_ref "XM_017314621.2"; exon_number "46"; gene_id "13518"; transcript_name "TCONS_00000057"; gene_biotype "protein_coding"; class_code "j"; transcript_id "TCONS_00000057"; gene_name "Dst"; transcript_biotype "protein_coding"
NC_000067.7	Novogene	exon	34247635	34247758	.	+	.	nearest_ref "XM_017314621.2"; exon_number "47"; gene_id "13518"; transcript_name "TCONS_00000057"; gene_biotype "protein_coding"; class_code "j"; transcript_id "TCONS_00000057"; gene_name "Dst"; transcript_biotype "protein_coding"
NC_000067.7	Novogene	exon	34250235	34250443	.	+	.	nearest_ref "XM_017314621.2"; exon_number "48"; gene_id "13518"; transcript_name "TCONS_00000057"; gene_biotype "protein_coding"; class_code "j"; transcript_id "TCONS_00000057"; gene_name "Dst"; transcript_biotype "protein_coding"
NC_000067.7	Novogene	exon	34251303	34251620	.	+	.	nearest_ref "XM_017314621.2"; exon_number "49"; gene_id "13518"; transcript_name "TCONS_00000057"; gene_biotype "protein_coding"; class_code "j"; transcript_id "TCONS_00000057"; gene_name "Dst"; transcript_biotype "protein_coding"
NC_000067.7	Novogene	exon	34251983	34252149	.	+	.	nearest_ref "XM_017314621.2"; exon_number "50"; gene_id "13518"; transcript_name "TCONS_00000057"; gene_biotype "protein_coding"; class_code "j"; transcript_id "TCONS_00000057"; gene_name "Dst"; transcript_biotype "protein_coding"
NC_000067.7	Novogene	exon	34253615	34253771	.	+	.	nearest_ref "XM_017314621.2"; exon_number "51"; gene_id "13518"; transcript_name "TCONS_00000057"; gene_biotype "protein_coding"; class_code "j"; transcript_id "TCONS_00000057"; gene_name "Dst"; transcript_biotype "protein_coding"
NC_000067.7	Novogene	exon	34254567	34254693	.	+	.	nearest_ref "XM_017314621.2"; exon_number "52"; gene_id "13518"; transcript_name "TCONS_00000057"; gene_biotype "protein_coding"; class_code "j"; transcript_id "TCONS_00000057"; gene_name "Dst"; transcript_biotype "protein_coding"
NC_000067.7	Novogene	exon	34256891	34256953	.	+	.	nearest_ref "XM_017314621.2"; exon_number "53"; gene_id "13518"; transcript_name "TCONS_00000057"; gene_biotype "protein_coding"; class_code "j"; transcript_id "TCONS_00000057"; gene_name "Dst"; transcript_biotype "protein_coding"
NC_000067.7	Novogene	exon	34257416	34257657	.	+	.	nearest_ref "XM_017314621.2"; exon_number "54"; gene_id "13518"; transcript_name "TCONS_00000057"; gene_biotype "protein_coding"; class_code "j"; transcript_id "TCONS_00000057"; gene_name "Dst"; transcript_biotype "protein_coding"
NC_000067.7	Novogene	exon	34258477	34258606	.	+	.	nearest_ref "XM_017314621.2"; exon_number "55"; gene_id "13518"; transcript_name "TCONS_00000057"; gene_biotype "protein_coding"; class_code "j"; transcript_id "TCONS_00000057"; gene_name "Dst"; transcript_biotype "protein_coding"
NC_000067.7	Novogene	exon	34262885	34263084	.	+	.	nearest_ref "XM_017314621.2"; exon_number "56"; gene_id "13518"; transcript_name "TCONS_00000057"; gene_biotype "protein_coding"; class_code "j"; transcript_id "TCONS_00000057"; gene_name "Dst"; transcript_biotype "protein_coding"
NC_000067.7	Novogene	exon	34264590	34265085	.	+	.	nearest_ref "XM_017314621.2"; exon_number "57"; gene_id "13518"; transcript_name "TCONS_00000057"; gene_biotype "protein_coding"; class_code "j"; transcript_id "TCONS_00000057"; gene_name "Dst"; transcript_biotype "protein_coding"
NC_000067.7	Novogene	exon	34266856	34268327	.	+	.	nearest_ref "XM_017314621.2"; exon_number "58"; gene_id "13518"; transcript_name "TCONS_00000057"; gene_biotype "protein_coding"; class_code "j"; transcript_id "TCONS_00000057"; gene_name "Dst"; transcript_biotype "protein_coding"
NC_000067.7	Novogene	exon	34281700	34281861	.	+	.	nearest_ref "XM_017314621.2"; exon_number "59"; gene_id "13518"; transcript_name "TCONS_00000057"; gene_biotype "protein_coding"; class_code "j"; transcript_id "TCONS_00000057"; gene_name "Dst"; transcript_biotype "protein_coding"
NC_000067.7	Novogene	exon	34283425	34283595	.	+	.	nearest_ref "XM_017314621.2"; exon_number "60"; gene_id "13518"; transcript_name "TCONS_00000057"; gene_biotype "protein_coding"; class_code "j"; transcript_id "TCONS_00000057"; gene_name "Dst"; transcript_biotype "protein_coding"
NC_000067.7	Novogene	exon	34286730	34286896	.	+	.	nearest_ref "XM_017314621.2"; exon_number "61"; gene_id "13518"; transcript_name "TCONS_00000057"; gene_biotype "protein_coding"; class_code "j"; transcript_id "TCONS_00000057"; gene_name "Dst"; transcript_biotype "protein_coding"
NC_000067.7	Novogene	exon	34288560	34288719	.	+	.	nearest_ref "XM_017314621.2"; exon_number "62"; gene_id "13518"; transcript_name "TCONS_00000057"; gene_biotype "protein_coding"; class_code "j"; transcript_id "TCONS_00000057"; gene_name "Dst"; transcript_biotype "protein_coding"
NC_000067.7	Novogene	exon	34288885	34289211	.	+	.	nearest_ref "XM_017314621.2"; exon_number "63"; gene_id "13518"; transcript_name "TCONS_00000057"; gene_biotype "protein_coding"; class_code "j"; transcript_id "TCONS_00000057"; gene_name "Dst"; transcript_biotype "protein_coding"
NC_000067.7	Novogene	exon	34289691	34289775	.	+	.	nearest_ref "XM_017314621.2"; exon_number "64"; gene_id "13518"; transcript_name "TCONS_00000057"; gene_biotype "protein_coding"; class_code "j"; transcript_id "TCONS_00000057"; gene_name "Dst"; transcript_biotype "protein_coding"
NC_000067.7	Novogene	exon	34290777	34291018	.	+	.	nearest_ref "XM_017314621.2"; exon_number "65"; gene_id "13518"; transcript_name "TCONS_00000057"; gene_biotype "protein_coding"; class_code "j"; transcript_id "TCONS_00000057"; gene_name "Dst"; transcript_biotype "protein_coding"
NC_000067.7	Novogene	exon	34291892	34292098	.	+	.	nearest_ref "XM_017314621.2"; exon_number "66"; gene_id "13518"; transcript_name "TCONS_00000057"; gene_biotype "protein_coding"; class_code "j"; transcript_id "TCONS_00000057"; gene_name "Dst"; transcript_biotype "protein_coding"
NC_000067.7	Novogene	exon	34295313	34295432	.	+	.	nearest_ref "XM_017314621.2"; exon_number "67"; gene_id "13518"; transcript_name "TCONS_00000057"; gene_biotype "protein_coding"; class_code "j"; transcript_id "TCONS_00000057"; gene_name "Dst"; transcript_biotype "protein_coding"
NC_000067.7	Novogene	exon	34295623	34295730	.	+	.	nearest_ref "XM_017314621.2"; exon_number "68"; gene_id "13518"; transcript_name "TCONS_00000057"; gene_biotype "protein_coding"; class_code "j"; transcript_id "TCONS_00000057"; gene_name "Dst"; transcript_biotype "protein_coding"
NC_000067.7	Novogene	exon	34296803	34297021	.	+	.	nearest_ref "XM_017314621.2"; exon_number "69"; gene_id "13518"; transcript_name "TCONS_00000057"; gene_biotype "protein_coding"; class_code "j"; transcript_id "TCONS_00000057"; gene_name "Dst"; transcript_biotype "protein_coding"
NC_000067.7	Novogene	exon	34299245	34299448	.	+	.	nearest_ref "XM_017314621.2"; exon_number "70"; gene_id "13518"; transcript_name "TCONS_00000057"; gene_biotype "protein_coding"; class_code "j"; transcript_id "TCONS_00000057"; gene_name "Dst"; transcript_biotype "protein_coding"
NC_000067.7	Novogene	exon	34301101	34301332	.	+	.	nearest_ref "XM_017314621.2"; exon_number "71"; gene_id "13518"; transcript_name "TCONS_00000057"; gene_biotype "protein_coding"; class_code "j"; transcript_id "TCONS_00000057"; gene_name "Dst"; transcript_biotype "protein_coding"
NC_000067.7	Novogene	exon	34302345	34302571	.	+	.	nearest_ref "XM_017314621.2"; exon_number "72"; gene_id "13518"; transcript_name "TCONS_00000057"; gene_biotype "protein_coding"; class_code "j"; transcript_id "TCONS_00000057"; gene_name "Dst"; transcript_biotype "protein_coding"
NC_000067.7	Novogene	exon	34303606	34303728	.	+	.	nearest_ref "XM_017314621.2"; exon_number "73"; gene_id "13518"; transcript_name "TCONS_00000057"; gene_biotype "protein_coding"; class_code "j"; transcript_id "TCONS_00000057"; gene_name "Dst"; transcript_biotype "protein_coding"
NC_000067.7	Novogene	exon	34303831	34303932	.	+	.	nearest_ref "XM_017314621.2"; exon_number "74"; gene_id "13518"; transcript_name "TCONS_00000057"; gene_biotype "protein_coding"; class_code "j"; transcript_id "TCONS_00000057"; gene_name "Dst"; transcript_biotype "protein_coding"
NC_000067.7	Novogene	exon	34305938	34306039	.	+	.	nearest_ref "XM_017314621.2"; exon_number "75"; gene_id "13518"; transcript_name "TCONS_00000057"; gene_biotype "protein_coding"; class_code "j"; transcript_id "TCONS_00000057"; gene_name "Dst"; transcript_biotype "protein_coding"
NC_000067.7	Novogene	exon	34307310	34307483	.	+	.	nearest_ref "XM_017314621.2"; exon_number "76"; gene_id "13518"; transcript_name "TCONS_00000057"; gene_biotype "protein_coding"; class_code "j"; transcript_id "TCONS_00000057"; gene_name "Dst"; transcript_biotype "protein_coding"
NC_000067.7	Novogene	exon	34307816	34307971	.	+	.	nearest_ref "XM_017314621.2"; exon_number "77"; gene_id "13518"; transcript_name "TCONS_00000057"; gene_biotype "protein_coding"; class_code "j"; transcript_id "TCONS_00000057"; gene_name "Dst"; transcript_biotype "protein_coding"
NC_000067.7	Novogene	exon	34309909	34310106	.	+	.	nearest_ref "XM_017314621.2"; exon_number "78"; gene_id "13518"; transcript_name "TCONS_00000057"; gene_biotype "protein_coding"; class_code "j"; transcript_id "TCONS_00000057"; gene_name "Dst"; transcript_biotype "protein_coding"
NC_000067.7	Novogene	exon	34310436	34310564	.	+	.	nearest_ref "XM_017314621.2"; exon_number "79"; gene_id "13518"; transcript_name "TCONS_00000057"; gene_biotype "protein_coding"; class_code "j"; transcript_id "TCONS_00000057"; gene_name "Dst"; transcript_biotype "protein_coding"
NC_000067.7	Novogene	exon	34313249	34313419	.	+	.	nearest_ref "XM_017314621.2"; exon_number "80"; gene_id "13518"; transcript_name "TCONS_00000057"; gene_biotype "protein_coding"; class_code "j"; transcript_id "TCONS_00000057"; gene_name "Dst"; transcript_biotype "protein_coding"
NC_000067.7	Novogene	exon	34314286	34314441	.	+	.	nearest_ref "XM_017314621.2"; exon_number "81"; gene_id "13518"; transcript_name "TCONS_00000057"; gene_biotype "protein_coding"; class_code "j"; transcript_id "TCONS_00000057"; gene_name "Dst"; transcript_biotype "protein_coding"
NC_000067.7	Novogene	exon	34314754	34314960	.	+	.	nearest_ref "XM_017314621.2"; exon_number "82"; gene_id "13518"; transcript_name "TCONS_00000057"; gene_biotype "protein_coding"; class_code "j"; transcript_id "TCONS_00000057"; gene_name "Dst"; transcript_biotype "protein_coding"
NC_000067.7	Novogene	exon	34317101	34317220	.	+	.	nearest_ref "XM_017314621.2"; exon_number "83"; gene_id "13518"; transcript_name "TCONS_00000057"; gene_biotype "protein_coding"; class_code "j"; transcript_id "TCONS_00000057"; gene_name "Dst"; transcript_biotype "protein_coding"
NC_000067.7	Novogene	exon	34321504	34321673	.	+	.	nearest_ref "XM_017314621.2"; exon_number "84"; gene_id "13518"; transcript_name "TCONS_00000057"; gene_biotype "protein_coding"; class_code "j"; transcript_id "TCONS_00000057"; gene_name "Dst"; transcript_biotype "protein_coding"
NC_000067.7	Novogene	exon	34323340	34323499	.	+	.	nearest_ref "XM_017314621.2"; exon_number "85"; gene_id "13518"; transcript_name "TCONS_00000057"; gene_biotype "protein_coding"; class_code "j"; transcript_id "TCONS_00000057"; gene_name "Dst"; transcript_biotype "protein_coding"
NC_000067.7	Novogene	exon	34326268	34326462	.	+	.	nearest_ref "XM_017314621.2"; exon_number "86"; gene_id "13518"; transcript_name "TCONS_00000057"; gene_biotype "protein_coding"; class_code "j"; transcript_id "TCONS_00000057"; gene_name "Dst"; transcript_biotype "protein_coding"
NC_000067.7	Novogene	exon	34326972	34327100	.	+	.	nearest_ref "XM_017314621.2"; exon_number "87"; gene_id "13518"; transcript_name "TCONS_00000057"; gene_biotype "protein_coding"; class_code "j"; transcript_id "TCONS_00000057"; gene_name "Dst"; transcript_biotype "protein_coding"
NC_000067.7	Novogene	exon	34328605	34328748	.	+	.	nearest_ref "XM_017314621.2"; exon_number "88"; gene_id "13518"; transcript_name "TCONS_00000057"; gene_biotype "protein_coding"; class_code "j"; transcript_id "TCONS_00000057"; gene_name "Dst"; transcript_biotype "protein_coding"
NC_000067.7	Novogene	exon	34329440	34329628	.	+	.	nearest_ref "XM_017314621.2"; exon_number "89"; gene_id "13518"; transcript_name "TCONS_00000057"; gene_biotype "protein_coding"; class_code "j"; transcript_id "TCONS_00000057"; gene_name "Dst"; transcript_biotype "protein_coding"
NC_000067.7	Novogene	exon	34330868	34330997	.	+	.	nearest_ref "XM_017314621.2"; exon_number "90"; gene_id "13518"; transcript_name "TCONS_00000057"; gene_biotype "protein_coding"; class_code "j"; transcript_id "TCONS_00000057"; gene_name "Dst"; transcript_biotype "protein_coding"
NC_000067.7	Novogene	exon	34332401	34332564	.	+	.	nearest_ref "XM_017314621.2"; exon_number "91"; gene_id "13518"; transcript_name "TCONS_00000057"; gene_biotype "protein_coding"; class_code "j"; transcript_id "TCONS_00000057"; gene_name "Dst"; transcript_biotype "protein_coding"
NC_000067.7	Novogene	exon	34333465	34333627	.	+	.	nearest_ref "XM_017314621.2"; exon_number "92"; gene_id "13518"; transcript_name "TCONS_00000057"; gene_biotype "protein_coding"; class_code "j"; transcript_id "TCONS_00000057"; gene_name "Dst"; transcript_biotype "protein_coding"
NC_000067.7	Novogene	exon	34334235	34334389	.	+	.	nearest_ref "XM_017314621.2"; exon_number "93"; gene_id "13518"; transcript_name "TCONS_00000057"; gene_biotype "protein_coding"; class_code "j"; transcript_id "TCONS_00000057"; gene_name "Dst"; transcript_biotype "protein_coding"
NC_000067.7	Novogene	exon	34334543	34334617	.	+	.	nearest_ref "XM_017314621.2"; exon_number "94"; gene_id "13518"; transcript_name "TCONS_00000057"; gene_biotype "protein_coding"; class_code "j"; transcript_id "TCONS_00000057"; gene_name "Dst"; transcript_biotype "protein_coding"
NC_000067.7	Novogene	exon	34335823	34335840	.	+	.	nearest_ref "XM_017314621.2"; exon_number "95"; gene_id "13518"; transcript_name "TCONS_00000057"; gene_biotype "protein_coding"; class_code "j"; transcript_id "TCONS_00000057"; gene_name "Dst"; transcript_biotype "protein_coding"
NC_000067.7	Novogene	exon	34338802	34338919	.	+	.	nearest_ref "XM_017314621.2"; exon_number "96"; gene_id "13518"; transcript_name "TCONS_00000057"; gene_biotype "protein_coding"; class_code "j"; transcript_id "TCONS_00000057"; gene_name "Dst"; transcript_biotype "protein_coding"
NC_000067.7	Novogene	exon	34341911	34342113	.	+	.	nearest_ref "XM_017314621.2"; exon_number "97"; gene_id "13518"; transcript_name "TCONS_00000057"; gene_biotype "protein_coding"; class_code "j"; transcript_id "TCONS_00000057"; gene_name "Dst"; transcript_biotype "protein_coding"
NC_000067.7	Novogene	exon	34342502	34342612	.	+	.	nearest_ref "XM_017314621.2"; exon_number "98"; gene_id "13518"; transcript_name "TCONS_00000057"; gene_biotype "protein_coding"; class_code "j"; transcript_id "TCONS_00000057"; gene_name "Dst"; transcript_biotype "protein_coding"
NC_000067.7	Novogene	exon	34345609	34345732	.	+	.	nearest_ref "XM_017314621.2"; exon_number "99"; gene_id "13518"; transcript_name "TCONS_00000057"; gene_biotype "protein_coding"; class_code "j"; transcript_id "TCONS_00000057"; gene_name "Dst"; transcript_biotype "protein_coding"
NC_000067.7	Novogene	exon	34346411	34347733	.	+	.	nearest_ref "XM_017314621.2"; exon_number "100"; gene_id "13518"; transcript_name "TCONS_00000057"; gene_biotype "protein_coding"; class_code "j"; transcript_id "TCONS_00000057"; gene_name "Dst"; transcript_biotype "protein_coding"
NC_000067.7	Novogene	exon	34050025	34050996	.	+	.	nearest_ref "XM_017314621.2"; exon_number "1"; gene_id "13518"; transcript_name "TCONS_00000059"; gene_biotype "protein_coding"; class_code "j"; transcript_id "TCONS_00000059"; gene_name "Dst"; transcript_biotype "protein_coding"
NC_000067.7	Novogene	exon	34125323	34125384	.	+	.	nearest_ref "XM_017314621.2"; exon_number "2"; gene_id "13518"; transcript_name "TCONS_00000059"; gene_biotype "protein_coding"; class_code "j"; transcript_id "TCONS_00000059"; gene_name "Dst"; transcript_biotype "protein_coding"
NC_000067.7	Novogene	exon	34153014	34153103	.	+	.	nearest_ref "XM_017314621.2"; exon_number "3"; gene_id "13518"; transcript_name "TCONS_00000059"; gene_biotype "protein_coding"; class_code "j"; transcript_id "TCONS_00000059"; gene_name "Dst"; transcript_biotype "protein_coding"
NC_000067.7	Novogene	exon	34153630	34153722	.	+	.	nearest_ref "XM_017314621.2"; exon_number "4"; gene_id "13518"; transcript_name "TCONS_00000059"; gene_biotype "protein_coding"; class_code "j"; transcript_id "TCONS_00000059"; gene_name "Dst"; transcript_biotype "protein_coding"
NC_000067.7	Novogene	exon	34155199	34155276	.	+	.	nearest_ref "XM_017314621.2"; exon_number "5"; gene_id "13518"; transcript_name "TCONS_00000059"; gene_biotype "protein_coding"; class_code "j"; transcript_id "TCONS_00000059"; gene_name "Dst"; transcript_biotype "protein_coding"
NC_000067.7	Novogene	exon	34156513	34156605	.	+	.	nearest_ref "XM_017314621.2"; exon_number "6"; gene_id "13518"; transcript_name "TCONS_00000059"; gene_biotype "protein_coding"; class_code "j"; transcript_id "TCONS_00000059"; gene_name "Dst"; transcript_biotype "protein_coding"
NC_000067.7	Novogene	exon	34174171	34174337	.	+	.	nearest_ref "XM_017314621.2"; exon_number "7"; gene_id "13518"; transcript_name "TCONS_00000059"; gene_biotype "protein_coding"; class_code "j"; transcript_id "TCONS_00000059"; gene_name "Dst"; transcript_biotype "protein_coding"
NC_000067.7	Novogene	exon	34191283	34191395	.	+	.	nearest_ref "XM_017314621.2"; exon_number "8"; gene_id "13518"; transcript_name "TCONS_00000059"; gene_biotype "protein_coding"; class_code "j"; transcript_id "TCONS_00000059"; gene_name "Dst"; transcript_biotype "protein_coding"
NC_000067.7	Novogene	exon	34191494	34191600	.	+	.	nearest_ref "XM_017314621.2"; exon_number "9"; gene_id "13518"; transcript_name "TCONS_00000059"; gene_biotype "protein_coding"; class_code "j"; transcript_id "TCONS_00000059"; gene_name "Dst"; transcript_biotype "protein_coding"
NC_000067.7	Novogene	exon	34193594	34193713	.	+	.	nearest_ref "XM_017314621.2"; exon_number "10"; gene_id "13518"; transcript_name "TCONS_00000059"; gene_biotype "protein_coding"; class_code "j"; transcript_id "TCONS_00000059"; gene_name "Dst"; transcript_biotype "protein_coding"
NC_000067.7	Novogene	exon	34195680	34195775	.	+	.	nearest_ref "XM_017314621.2"; exon_number "11"; gene_id "13518"; transcript_name "TCONS_00000059"; gene_biotype "protein_coding"; class_code "j"; transcript_id "TCONS_00000059"; gene_name "Dst"; transcript_biotype "protein_coding"
NC_000067.7	Novogene	exon	34195862	34195989	.	+	.	nearest_ref "XM_017314621.2"; exon_number "12"; gene_id "13518"; transcript_name "TCONS_00000059"; gene_biotype "protein_coding"; class_code "j"; transcript_id "TCONS_00000059"; gene_name "Dst"; transcript_biotype "protein_coding"
NC_000067.7	Novogene	exon	34199701	34199794	.	+	.	nearest_ref "XM_017314621.2"; exon_number "13"; gene_id "13518"; transcript_name "TCONS_00000059"; gene_biotype "protein_coding"; class_code "j"; transcript_id "TCONS_00000059"; gene_name "Dst"; transcript_biotype "protein_coding"
NC_000067.7	Novogene	exon	34200085	34200239	.	+	.	nearest_ref "XM_017314621.2"; exon_number "14"; gene_id "13518"; transcript_name "TCONS_00000059"; gene_biotype "protein_coding"; class_code "j"; transcript_id "TCONS_00000059"; gene_name "Dst"; transcript_biotype "protein_coding"
NC_000067.7	Novogene	exon	34202090	34202552	.	+	.	nearest_ref "XM_017314621.2"; exon_number "15"; gene_id "13518"; transcript_name "TCONS_00000059"; gene_biotype "protein_coding"; class_code "j"; transcript_id "TCONS_00000059"; gene_name "Dst"; transcript_biotype "protein_coding"
NC_000067.7	Novogene	exon	34202707	34202835	.	+	.	nearest_ref "XM_017314621.2"; exon_number "16"; gene_id "13518"; transcript_name "TCONS_00000059"; gene_biotype "protein_coding"; class_code "j"; transcript_id "TCONS_00000059"; gene_name "Dst"; transcript_biotype "protein_coding"
NC_000067.7	Novogene	exon	34202978	34203055	.	+	.	nearest_ref "XM_017314621.2"; exon_number "17"; gene_id "13518"; transcript_name "TCONS_00000059"; gene_biotype "protein_coding"; class_code "j"; transcript_id "TCONS_00000059"; gene_name "Dst"; transcript_biotype "protein_coding"
NC_000067.7	Novogene	exon	34203157	34203318	.	+	.	nearest_ref "XM_017314621.2"; exon_number "18"; gene_id "13518"; transcript_name "TCONS_00000059"; gene_biotype "protein_coding"; class_code "j"; transcript_id "TCONS_00000059"; gene_name "Dst"; transcript_biotype "protein_coding"
NC_000067.7	Novogene	exon	34203408	34203512	.	+	.	nearest_ref "XM_017314621.2"; exon_number "19"; gene_id "13518"; transcript_name "TCONS_00000059"; gene_biotype "protein_coding"; class_code "j"; transcript_id "TCONS_00000059"; gene_name "Dst"; transcript_biotype "protein_coding"
NC_000067.7	Novogene	exon	34204139	34204234	.	+	.	nearest_ref "XM_017314621.2"; exon_number "20"; gene_id "13518"; transcript_name "TCONS_00000059"; gene_biotype "protein_coding"; class_code "j"; transcript_id "TCONS_00000059"; gene_name "Dst"; transcript_biotype "protein_coding"
NC_000067.7	Novogene	exon	34205261	34205386	.	+	.	nearest_ref "XM_017314621.2"; exon_number "21"; gene_id "13518"; transcript_name "TCONS_00000059"; gene_biotype "protein_coding"; class_code "j"; transcript_id "TCONS_00000059"; gene_name "Dst"; transcript_biotype "protein_coding"
NC_000067.7	Novogene	exon	34206020	34206172	.	+	.	nearest_ref "XM_017314621.2"; exon_number "22"; gene_id "13518"; transcript_name "TCONS_00000059"; gene_biotype "protein_coding"; class_code "j"; transcript_id "TCONS_00000059"; gene_name "Dst"; transcript_biotype "protein_coding"
NC_000067.7	Novogene	exon	34206357	34206511	.	+	.	nearest_ref "XM_017314621.2"; exon_number "23"; gene_id "13518"; transcript_name "TCONS_00000059"; gene_biotype "protein_coding"; class_code "j"; transcript_id "TCONS_00000059"; gene_name "Dst"; transcript_biotype "protein_coding"
NC_000067.7	Novogene	exon	34206692	34206818	.	+	.	nearest_ref "XM_017314621.2"; exon_number "24"; gene_id "13518"; transcript_name "TCONS_00000059"; gene_biotype "protein_coding"; class_code "j"; transcript_id "TCONS_00000059"; gene_name "Dst"; transcript_biotype "protein_coding"
NC_000067.7	Novogene	exon	34206904	34207087	.	+	.	nearest_ref "XM_017314621.2"; exon_number "25"; gene_id "13518"; transcript_name "TCONS_00000059"; gene_biotype "protein_coding"; class_code "j"; transcript_id "TCONS_00000059"; gene_name "Dst"; transcript_biotype "protein_coding"
NC_000067.7	Novogene	exon	34208245	34208402	.	+	.	nearest_ref "XM_017314621.2"; exon_number "26"; gene_id "13518"; transcript_name "TCONS_00000059"; gene_biotype "protein_coding"; class_code "j"; transcript_id "TCONS_00000059"; gene_name "Dst"; transcript_biotype "protein_coding"
NC_000067.7	Novogene	exon	34208831	34209009	.	+	.	nearest_ref "XM_017314621.2"; exon_number "27"; gene_id "13518"; transcript_name "TCONS_00000059"; gene_biotype "protein_coding"; class_code "j"; transcript_id "TCONS_00000059"; gene_name "Dst"; transcript_biotype "protein_coding"
NC_000067.7	Novogene	exon	34209441	34209579	.	+	.	nearest_ref "XM_017314621.2"; exon_number "28"; gene_id "13518"; transcript_name "TCONS_00000059"; gene_biotype "protein_coding"; class_code "j"; transcript_id "TCONS_00000059"; gene_name "Dst"; transcript_biotype "protein_coding"
NC_000067.7	Novogene	exon	34210197	34210390	.	+	.	nearest_ref "XM_017314621.2"; exon_number "29"; gene_id "13518"; transcript_name "TCONS_00000059"; gene_biotype "protein_coding"; class_code "j"; transcript_id "TCONS_00000059"; gene_name "Dst"; transcript_biotype "protein_coding"
NC_000067.7	Novogene	exon	34211264	34211426	.	+	.	nearest_ref "XM_017314621.2"; exon_number "30"; gene_id "13518"; transcript_name "TCONS_00000059"; gene_biotype "protein_coding"; class_code "j"; transcript_id "TCONS_00000059"; gene_name "Dst"; transcript_biotype "protein_coding"
NC_000067.7	Novogene	exon	34212083	34212166	.	+	.	nearest_ref "XM_017314621.2"; exon_number "31"; gene_id "13518"; transcript_name "TCONS_00000059"; gene_biotype "protein_coding"; class_code "j"; transcript_id "TCONS_00000059"; gene_name "Dst"; transcript_biotype "protein_coding"
NC_000067.7	Novogene	exon	34213196	34213303	.	+	.	nearest_ref "XM_017314621.2"; exon_number "32"; gene_id "13518"; transcript_name "TCONS_00000059"; gene_biotype "protein_coding"; class_code "j"; transcript_id "TCONS_00000059"; gene_name "Dst"; transcript_biotype "protein_coding"
NC_000067.7	Novogene	exon	34213778	34213876	.	+	.	nearest_ref "XM_017314621.2"; exon_number "33"; gene_id "13518"; transcript_name "TCONS_00000059"; gene_biotype "protein_coding"; class_code "j"; transcript_id "TCONS_00000059"; gene_name "Dst"; transcript_biotype "protein_coding"
NC_000067.7	Novogene	exon	34223097	34223225	.	+	.	nearest_ref "XM_017314621.2"; exon_number "34"; gene_id "13518"; transcript_name "TCONS_00000059"; gene_biotype "protein_coding"; class_code "j"; transcript_id "TCONS_00000059"; gene_name "Dst"; transcript_biotype "protein_coding"
NC_000067.7	Novogene	exon	34225043	34225131	.	+	.	nearest_ref "XM_017314621.2"; exon_number "35"; gene_id "13518"; transcript_name "TCONS_00000059"; gene_biotype "protein_coding"; class_code "j"; transcript_id "TCONS_00000059"; gene_name "Dst"; transcript_biotype "protein_coding"
NC_000067.7	Novogene	exon	34225900	34226032	.	+	.	nearest_ref "XM_017314621.2"; exon_number "36"; gene_id "13518"; transcript_name "TCONS_00000059"; gene_biotype "protein_coding"; class_code "j"; transcript_id "TCONS_00000059"; gene_name "Dst"; transcript_biotype "protein_coding"
NC_000067.7	Novogene	exon	34227053	34232344	.	+	.	nearest_ref "XM_017314621.2"; exon_number "37"; gene_id "13518"; transcript_name "TCONS_00000059"; gene_biotype "protein_coding"; class_code "j"; transcript_id "TCONS_00000059"; gene_name "Dst"; transcript_biotype "protein_coding"
NC_000067.7	Novogene	exon	34232473	34232622	.	+	.	nearest_ref "XM_017314621.2"; exon_number "38"; gene_id "13518"; transcript_name "TCONS_00000059"; gene_biotype "protein_coding"; class_code "j"; transcript_id "TCONS_00000059"; gene_name "Dst"; transcript_biotype "protein_coding"
NC_000067.7	Novogene	exon	34233086	34233301	.	+	.	nearest_ref "XM_017314621.2"; exon_number "39"; gene_id "13518"; transcript_name "TCONS_00000059"; gene_biotype "protein_coding"; class_code "j"; transcript_id "TCONS_00000059"; gene_name "Dst"; transcript_biotype "protein_coding"
NC_000067.7	Novogene	exon	34233596	34233745	.	+	.	nearest_ref "XM_017314621.2"; exon_number "40"; gene_id "13518"; transcript_name "TCONS_00000059"; gene_biotype "protein_coding"; class_code "j"; transcript_id "TCONS_00000059"; gene_name "Dst"; transcript_biotype "protein_coding"
NC_000067.7	Novogene	exon	34234909	34235142	.	+	.	nearest_ref "XM_017314621.2"; exon_number "41"; gene_id "13518"; transcript_name "TCONS_00000059"; gene_biotype "protein_coding"; class_code "j"; transcript_id "TCONS_00000059"; gene_name "Dst"; transcript_biotype "protein_coding"
NC_000067.7	Novogene	exon	34236282	34236434	.	+	.	nearest_ref "XM_017314621.2"; exon_number "42"; gene_id "13518"; transcript_name "TCONS_00000059"; gene_biotype "protein_coding"; class_code "j"; transcript_id "TCONS_00000059"; gene_name "Dst"; transcript_biotype "protein_coding"
NC_000067.7	Novogene	exon	34237599	34237832	.	+	.	nearest_ref "XM_017314621.2"; exon_number "43"; gene_id "13518"; transcript_name "TCONS_00000059"; gene_biotype "protein_coding"; class_code "j"; transcript_id "TCONS_00000059"; gene_name "Dst"; transcript_biotype "protein_coding"
NC_000067.7	Novogene	exon	34238373	34238639	.	+	.	nearest_ref "XM_017314621.2"; exon_number "44"; gene_id "13518"; transcript_name "TCONS_00000059"; gene_biotype "protein_coding"; class_code "j"; transcript_id "TCONS_00000059"; gene_name "Dst"; transcript_biotype "protein_coding"
NC_000067.7	Novogene	exon	34239951	34240496	.	+	.	nearest_ref "XM_017314621.2"; exon_number "45"; gene_id "13518"; transcript_name "TCONS_00000059"; gene_biotype "protein_coding"; class_code "j"; transcript_id "TCONS_00000059"; gene_name "Dst"; transcript_biotype "protein_coding"
NC_000067.7	Novogene	exon	34241526	34241702	.	+	.	nearest_ref "XM_017314621.2"; exon_number "46"; gene_id "13518"; transcript_name "TCONS_00000059"; gene_biotype "protein_coding"; class_code "j"; transcript_id "TCONS_00000059"; gene_name "Dst"; transcript_biotype "protein_coding"
NC_000067.7	Novogene	exon	34247635	34247758	.	+	.	nearest_ref "XM_017314621.2"; exon_number "47"; gene_id "13518"; transcript_name "TCONS_00000059"; gene_biotype "protein_coding"; class_code "j"; transcript_id "TCONS_00000059"; gene_name "Dst"; transcript_biotype "protein_coding"
NC_000067.7	Novogene	exon	34250235	34250443	.	+	.	nearest_ref "XM_017314621.2"; exon_number "48"; gene_id "13518"; transcript_name "TCONS_00000059"; gene_biotype "protein_coding"; class_code "j"; transcript_id "TCONS_00000059"; gene_name "Dst"; transcript_biotype "protein_coding"
NC_000067.7	Novogene	exon	34251303	34251620	.	+	.	nearest_ref "XM_017314621.2"; exon_number "49"; gene_id "13518"; transcript_name "TCONS_00000059"; gene_biotype "protein_coding"; class_code "j"; transcript_id "TCONS_00000059"; gene_name "Dst"; transcript_biotype "protein_coding"
NC_000067.7	Novogene	exon	34251983	34252149	.	+	.	nearest_ref "XM_017314621.2"; exon_number "50"; gene_id "13518"; transcript_name "TCONS_00000059"; gene_biotype "protein_coding"; class_code "j"; transcript_id "TCONS_00000059"; gene_name "Dst"; transcript_biotype "protein_coding"
NC_000067.7	Novogene	exon	34253615	34253771	.	+	.	nearest_ref "XM_017314621.2"; exon_number "51"; gene_id "13518"; transcript_name "TCONS_00000059"; gene_biotype "protein_coding"; class_code "j"; transcript_id "TCONS_00000059"; gene_name "Dst"; transcript_biotype "protein_coding"
NC_000067.7	Novogene	exon	34254567	34254693	.	+	.	nearest_ref "XM_017314621.2"; exon_number "52"; gene_id "13518"; transcript_name "TCONS_00000059"; gene_biotype "protein_coding"; class_code "j"; transcript_id "TCONS_00000059"; gene_name "Dst"; transcript_biotype "protein_coding"
NC_000067.7	Novogene	exon	34256891	34256953	.	+	.	nearest_ref "XM_017314621.2"; exon_number "53"; gene_id "13518"; transcript_name "TCONS_00000059"; gene_biotype "protein_coding"; class_code "j"; transcript_id "TCONS_00000059"; gene_name "Dst"; transcript_biotype "protein_coding"
NC_000067.7	Novogene	exon	34257416	34257657	.	+	.	nearest_ref "XM_017314621.2"; exon_number "54"; gene_id "13518"; transcript_name "TCONS_00000059"; gene_biotype "protein_coding"; class_code "j"; transcript_id "TCONS_00000059"; gene_name "Dst"; transcript_biotype "protein_coding"
NC_000067.7	Novogene	exon	34258477	34258606	.	+	.	nearest_ref "XM_017314621.2"; exon_number "55"; gene_id "13518"; transcript_name "TCONS_00000059"; gene_biotype "protein_coding"; class_code "j"; transcript_id "TCONS_00000059"; gene_name "Dst"; transcript_biotype "protein_coding"
NC_000067.7	Novogene	exon	34262885	34263084	.	+	.	nearest_ref "XM_017314621.2"; exon_number "56"; gene_id "13518"; transcript_name "TCONS_00000059"; gene_biotype "protein_coding"; class_code "j"; transcript_id "TCONS_00000059"; gene_name "Dst"; transcript_biotype "protein_coding"
NC_000067.7	Novogene	exon	34264590	34265085	.	+	.	nearest_ref "XM_017314621.2"; exon_number "57"; gene_id "13518"; transcript_name "TCONS_00000059"; gene_biotype "protein_coding"; class_code "j"; transcript_id "TCONS_00000059"; gene_name "Dst"; transcript_biotype "protein_coding"
NC_000067.7	Novogene	exon	34266856	34268327	.	+	.	nearest_ref "XM_017314621.2"; exon_number "58"; gene_id "13518"; transcript_name "TCONS_00000059"; gene_biotype "protein_coding"; class_code "j"; transcript_id "TCONS_00000059"; gene_name "Dst"; transcript_biotype "protein_coding"
NC_000067.7	Novogene	exon	34281700	34281861	.	+	.	nearest_ref "XM_017314621.2"; exon_number "59"; gene_id "13518"; transcript_name "TCONS_00000059"; gene_biotype "protein_coding"; class_code "j"; transcript_id "TCONS_00000059"; gene_name "Dst"; transcript_biotype "protein_coding"
NC_000067.7	Novogene	exon	34283425	34283595	.	+	.	nearest_ref "XM_017314621.2"; exon_number "60"; gene_id "13518"; transcript_name "TCONS_00000059"; gene_biotype "protein_coding"; class_code "j"; transcript_id "TCONS_00000059"; gene_name "Dst"; transcript_biotype "protein_coding"
NC_000067.7	Novogene	exon	34286730	34286896	.	+	.	nearest_ref "XM_017314621.2"; exon_number "61"; gene_id "13518"; transcript_name "TCONS_00000059"; gene_biotype "protein_coding"; class_code "j"; transcript_id "TCONS_00000059"; gene_name "Dst"; transcript_biotype "protein_coding"
NC_000067.7	Novogene	exon	34288560	34288719	.	+	.	nearest_ref "XM_017314621.2"; exon_number "62"; gene_id "13518"; transcript_name "TCONS_00000059"; gene_biotype "protein_coding"; class_code "j"; transcript_id "TCONS_00000059"; gene_name "Dst"; transcript_biotype "protein_coding"
NC_000067.7	Novogene	exon	34288885	34289211	.	+	.	nearest_ref "XM_017314621.2"; exon_number "63"; gene_id "13518"; transcript_name "TCONS_00000059"; gene_biotype "protein_coding"; class_code "j"; transcript_id "TCONS_00000059"; gene_name "Dst"; transcript_biotype "protein_coding"
NC_000067.7	Novogene	exon	34289691	34289775	.	+	.	nearest_ref "XM_017314621.2"; exon_number "64"; gene_id "13518"; transcript_name "TCONS_00000059"; gene_biotype "protein_coding"; class_code "j"; transcript_id "TCONS_00000059"; gene_name "Dst"; transcript_biotype "protein_coding"
NC_000067.7	Novogene	exon	34290777	34291018	.	+	.	nearest_ref "XM_017314621.2"; exon_number "65"; gene_id "13518"; transcript_name "TCONS_00000059"; gene_biotype "protein_coding"; class_code "j"; transcript_id "TCONS_00000059"; gene_name "Dst"; transcript_biotype "protein_coding"
NC_000067.7	Novogene	exon	34291892	34292098	.	+	.	nearest_ref "XM_017314621.2"; exon_number "66"; gene_id "13518"; transcript_name "TCONS_00000059"; gene_biotype "protein_coding"; class_code "j"; transcript_id "TCONS_00000059"; gene_name "Dst"; transcript_biotype "protein_coding"
NC_000067.7	Novogene	exon	34295313	34295432	.	+	.	nearest_ref "XM_017314621.2"; exon_number "67"; gene_id "13518"; transcript_name "TCONS_00000059"; gene_biotype "protein_coding"; class_code "j"; transcript_id "TCONS_00000059"; gene_name "Dst"; transcript_biotype "protein_coding"
NC_000067.7	Novogene	exon	34295623	34295730	.	+	.	nearest_ref "XM_017314621.2"; exon_number "68"; gene_id "13518"; transcript_name "TCONS_00000059"; gene_biotype "protein_coding"; class_code "j"; transcript_id "TCONS_00000059"; gene_name "Dst"; transcript_biotype "protein_coding"
NC_000067.7	Novogene	exon	34296803	34297021	.	+	.	nearest_ref "XM_017314621.2"; exon_number "69"; gene_id "13518"; transcript_name "TCONS_00000059"; gene_biotype "protein_coding"; class_code "j"; transcript_id "TCONS_00000059"; gene_name "Dst"; transcript_biotype "protein_coding"
NC_000067.7	Novogene	exon	34299245	34299448	.	+	.	nearest_ref "XM_017314621.2"; exon_number "70"; gene_id "13518"; transcript_name "TCONS_00000059"; gene_biotype "protein_coding"; class_code "j"; transcript_id "TCONS_00000059"; gene_name "Dst"; transcript_biotype "protein_coding"
NC_000067.7	Novogene	exon	34301101	34301332	.	+	.	nearest_ref "XM_017314621.2"; exon_number "71"; gene_id "13518"; transcript_name "TCONS_00000059"; gene_biotype "protein_coding"; class_code "j"; transcript_id "TCONS_00000059"; gene_name "Dst"; transcript_biotype "protein_coding"
NC_000067.7	Novogene	exon	34302345	34302571	.	+	.	nearest_ref "XM_017314621.2"; exon_number "72"; gene_id "13518"; transcript_name "TCONS_00000059"; gene_biotype "protein_coding"; class_code "j"; transcript_id "TCONS_00000059"; gene_name "Dst"; transcript_biotype "protein_coding"
NC_000067.7	Novogene	exon	34303606	34303728	.	+	.	nearest_ref "XM_017314621.2"; exon_number "73"; gene_id "13518"; transcript_name "TCONS_00000059"; gene_biotype "protein_coding"; class_code "j"; transcript_id "TCONS_00000059"; gene_name "Dst"; transcript_biotype "protein_coding"
NC_000067.7	Novogene	exon	34303831	34303932	.	+	.	nearest_ref "XM_017314621.2"; exon_number "74"; gene_id "13518"; transcript_name "TCONS_00000059"; gene_biotype "protein_coding"; class_code "j"; transcript_id "TCONS_00000059"; gene_name "Dst"; transcript_biotype "protein_coding"
NC_000067.7	Novogene	exon	34305938	34306039	.	+	.	nearest_ref "XM_017314621.2"; exon_number "75"; gene_id "13518"; transcript_name "TCONS_00000059"; gene_biotype "protein_coding"; class_code "j"; transcript_id "TCONS_00000059"; gene_name "Dst"; transcript_biotype "protein_coding"
NC_000067.7	Novogene	exon	34307310	34307483	.	+	.	nearest_ref "XM_017314621.2"; exon_number "76"; gene_id "13518"; transcript_name "TCONS_00000059"; gene_biotype "protein_coding"; class_code "j"; transcript_id "TCONS_00000059"; gene_name "Dst"; transcript_biotype "protein_coding"
NC_000067.7	Novogene	exon	34307816	34307971	.	+	.	nearest_ref "XM_017314621.2"; exon_number "77"; gene_id "13518"; transcript_name "TCONS_00000059"; gene_biotype "protein_coding"; class_code "j"; transcript_id "TCONS_00000059"; gene_name "Dst"; transcript_biotype "protein_coding"
NC_000067.7	Novogene	exon	34309909	34310106	.	+	.	nearest_ref "XM_017314621.2"; exon_number "78"; gene_id "13518"; transcript_name "TCONS_00000059"; gene_biotype "protein_coding"; class_code "j"; transcript_id "TCONS_00000059"; gene_name "Dst"; transcript_biotype "protein_coding"
NC_000067.7	Novogene	exon	34310436	34310564	.	+	.	nearest_ref "XM_017314621.2"; exon_number "79"; gene_id "13518"; transcript_name "TCONS_00000059"; gene_biotype "protein_coding"; class_code "j"; transcript_id "TCONS_00000059"; gene_name "Dst"; transcript_biotype "protein_coding"
NC_000067.7	Novogene	exon	34313249	34313419	.	+	.	nearest_ref "XM_017314621.2"; exon_number "80"; gene_id "13518"; transcript_name "TCONS_00000059"; gene_biotype "protein_coding"; class_code "j"; transcript_id "TCONS_00000059"; gene_name "Dst"; transcript_biotype "protein_coding"
NC_000067.7	Novogene	exon	34314286	34314441	.	+	.	nearest_ref "XM_017314621.2"; exon_number "81"; gene_id "13518"; transcript_name "TCONS_00000059"; gene_biotype "protein_coding"; class_code "j"; transcript_id "TCONS_00000059"; gene_name "Dst"; transcript_biotype "protein_coding"
NC_000067.7	Novogene	exon	34314754	34314960	.	+	.	nearest_ref "XM_017314621.2"; exon_number "82"; gene_id "13518"; transcript_name "TCONS_00000059"; gene_biotype "protein_coding"; class_code "j"; transcript_id "TCONS_00000059"; gene_name "Dst"; transcript_biotype "protein_coding"
NC_000067.7	Novogene	exon	34317101	34317220	.	+	.	nearest_ref "XM_017314621.2"; exon_number "83"; gene_id "13518"; transcript_name "TCONS_00000059"; gene_biotype "protein_coding"; class_code "j"; transcript_id "TCONS_00000059"; gene_name "Dst"; transcript_biotype "protein_coding"
NC_000067.7	Novogene	exon	34321504	34321673	.	+	.	nearest_ref "XM_017314621.2"; exon_number "84"; gene_id "13518"; transcript_name "TCONS_00000059"; gene_biotype "protein_coding"; class_code "j"; transcript_id "TCONS_00000059"; gene_name "Dst"; transcript_biotype "protein_coding"
NC_000067.7	Novogene	exon	34323340	34323499	.	+	.	nearest_ref "XM_017314621.2"; exon_number "85"; gene_id "13518"; transcript_name "TCONS_00000059"; gene_biotype "protein_coding"; class_code "j"; transcript_id "TCONS_00000059"; gene_name "Dst"; transcript_biotype "protein_coding"
NC_000067.7	Novogene	exon	34326268	34326462	.	+	.	nearest_ref "XM_017314621.2"; exon_number "86"; gene_id "13518"; transcript_name "TCONS_00000059"; gene_biotype "protein_coding"; class_code "j"; transcript_id "TCONS_00000059"; gene_name "Dst"; transcript_biotype "protein_coding"
NC_000067.7	Novogene	exon	34326972	34327100	.	+	.	nearest_ref "XM_017314621.2"; exon_number "87"; gene_id "13518"; transcript_name "TCONS_00000059"; gene_biotype "protein_coding"; class_code "j"; transcript_id "TCONS_00000059"; gene_name "Dst"; transcript_biotype "protein_coding"
NC_000067.7	Novogene	exon	34328605	34328748	.	+	.	nearest_ref "XM_017314621.2"; exon_number "88"; gene_id "13518"; transcript_name "TCONS_00000059"; gene_biotype "protein_coding"; class_code "j"; transcript_id "TCONS_00000059"; gene_name "Dst"; transcript_biotype "protein_coding"
NC_000067.7	Novogene	exon	34329440	34329628	.	+	.	nearest_ref "XM_017314621.2"; exon_number "89"; gene_id "13518"; transcript_name "TCONS_00000059"; gene_biotype "protein_coding"; class_code "j"; transcript_id "TCONS_00000059"; gene_name "Dst"; transcript_biotype "protein_coding"
NC_000067.7	Novogene	exon	34330868	34330997	.	+	.	nearest_ref "XM_017314621.2"; exon_number "90"; gene_id "13518"; transcript_name "TCONS_00000059"; gene_biotype "protein_coding"; class_code "j"; transcript_id "TCONS_00000059"; gene_name "Dst"; transcript_biotype "protein_coding"
NC_000067.7	Novogene	exon	34332401	34332564	.	+	.	nearest_ref "XM_017314621.2"; exon_number "91"; gene_id "13518"; transcript_name "TCONS_00000059"; gene_biotype "protein_coding"; class_code "j"; transcript_id "TCONS_00000059"; gene_name "Dst"; transcript_biotype "protein_coding"
NC_000067.7	Novogene	exon	34333465	34333627	.	+	.	nearest_ref "XM_017314621.2"; exon_number "92"; gene_id "13518"; transcript_name "TCONS_00000059"; gene_biotype "protein_coding"; class_code "j"; transcript_id "TCONS_00000059"; gene_name "Dst"; transcript_biotype "protein_coding"
NC_000067.7	Novogene	exon	34334235	34334389	.	+	.	nearest_ref "XM_017314621.2"; exon_number "93"; gene_id "13518"; transcript_name "TCONS_00000059"; gene_biotype "protein_coding"; class_code "j"; transcript_id "TCONS_00000059"; gene_name "Dst"; transcript_biotype "protein_coding"
NC_000067.7	Novogene	exon	34334543	34334617	.	+	.	nearest_ref "XM_017314621.2"; exon_number "94"; gene_id "13518"; transcript_name "TCONS_00000059"; gene_biotype "protein_coding"; class_code "j"; transcript_id "TCONS_00000059"; gene_name "Dst"; transcript_biotype "protein_coding"
NC_000067.7	Novogene	exon	34335823	34335840	.	+	.	nearest_ref "XM_017314621.2"; exon_number "95"; gene_id "13518"; transcript_name "TCONS_00000059"; gene_biotype "protein_coding"; class_code "j"; transcript_id "TCONS_00000059"; gene_name "Dst"; transcript_biotype "protein_coding"
NC_000067.7	Novogene	exon	34338802	34338919	.	+	.	nearest_ref "XM_017314621.2"; exon_number "96"; gene_id "13518"; transcript_name "TCONS_00000059"; gene_biotype "protein_coding"; class_code "j"; transcript_id "TCONS_00000059"; gene_name "Dst"; transcript_biotype "protein_coding"
NC_000067.7	Novogene	exon	34340942	34341013	.	+	.	nearest_ref "XM_017314621.2"; exon_number "97"; gene_id "13518"; transcript_name "TCONS_00000059"; gene_biotype "protein_coding"; class_code "j"; transcript_id "TCONS_00000059"; gene_name "Dst"; transcript_biotype "protein_coding"
NC_000067.7	Novogene	exon	34341911	34342113	.	+	.	nearest_ref "XM_017314621.2"; exon_number "98"; gene_id "13518"; transcript_name "TCONS_00000059"; gene_biotype "protein_coding"; class_code "j"; transcript_id "TCONS_00000059"; gene_name "Dst"; transcript_biotype "protein_coding"
NC_000067.7	Novogene	exon	34342502	34342612	.	+	.	nearest_ref "XM_017314621.2"; exon_number "99"; gene_id "13518"; transcript_name "TCONS_00000059"; gene_biotype "protein_coding"; class_code "j"; transcript_id "TCONS_00000059"; gene_name "Dst"; transcript_biotype "protein_coding"
NC_000067.7	Novogene	exon	34345609	34345732	.	+	.	nearest_ref "XM_017314621.2"; exon_number "100"; gene_id "13518"; transcript_name "TCONS_00000059"; gene_biotype "protein_coding"; class_code "j"; transcript_id "TCONS_00000059"; gene_name "Dst"; transcript_biotype "protein_coding"
NC_000067.7	Novogene	exon	34346411	34347733	.	+	.	nearest_ref "XM_017314621.2"; exon_number "101"; gene_id "13518"; transcript_name "TCONS_00000059"; gene_biotype "protein_coding"; class_code "j"; transcript_id "TCONS_00000059"; gene_name "Dst"; transcript_biotype "protein_coding"
NC_000067.7	Novogene	exon	34476314	34476691	.	+	.	nearest_ref "NM_178601.3"; exon_number "1"; gene_id "27993"; transcript_name "TCONS_00000061"; gene_biotype "protein_coding"; class_code "j"; transcript_id "TCONS_00000061"; gene_name "Imp4"; transcript_biotype "protein_coding"
NC_000067.7	Novogene	exon	34476808	34476939	.	+	.	nearest_ref "NM_178601.3"; exon_number "2"; gene_id "27993"; transcript_name "TCONS_00000061"; gene_biotype "protein_coding"; class_code "j"; transcript_id "TCONS_00000061"; gene_name "Imp4"; transcript_biotype "protein_coding"
NC_000067.7	Novogene	exon	34477931	34478013	.	+	.	nearest_ref "NM_178601.3"; exon_number "3"; gene_id "27993"; transcript_name "TCONS_00000061"; gene_biotype "protein_coding"; class_code "j"; transcript_id "TCONS_00000061"; gene_name "Imp4"; transcript_biotype "protein_coding"
NC_000067.7	Novogene	exon	34478124	34478227	.	+	.	nearest_ref "NM_178601.3"; exon_number "4"; gene_id "27993"; transcript_name "TCONS_00000061"; gene_biotype "protein_coding"; class_code "j"; transcript_id "TCONS_00000061"; gene_name "Imp4"; transcript_biotype "protein_coding"
NC_000067.7	Novogene	exon	34478309	34479008	.	+	.	nearest_ref "NM_178601.3"; exon_number "5"; gene_id "27993"; transcript_name "TCONS_00000061"; gene_biotype "protein_coding"; class_code "j"; transcript_id "TCONS_00000061"; gene_name "Imp4"; transcript_biotype "protein_coding"
NC_000067.7	Novogene	exon	34479122	34479230	.	+	.	nearest_ref "NM_178601.3"; exon_number "6"; gene_id "27993"; transcript_name "TCONS_00000061"; gene_biotype "protein_coding"; class_code "j"; transcript_id "TCONS_00000061"; gene_name "Imp4"; transcript_biotype "protein_coding"
NC_000067.7	Novogene	exon	34481991	34482074	.	+	.	nearest_ref "NM_178601.3"; exon_number "7"; gene_id "27993"; transcript_name "TCONS_00000061"; gene_biotype "protein_coding"; class_code "j"; transcript_id "TCONS_00000061"; gene_name "Imp4"; transcript_biotype "protein_coding"
NC_000067.7	Novogene	exon	34482459	34482568	.	+	.	nearest_ref "NM_178601.3"; exon_number "8"; gene_id "27993"; transcript_name "TCONS_00000061"; gene_biotype "protein_coding"; class_code "j"; transcript_id "TCONS_00000061"; gene_name "Imp4"; transcript_biotype "protein_coding"
NC_000067.7	Novogene	exon	34482644	34482776	.	+	.	nearest_ref "NM_178601.3"; exon_number "9"; gene_id "27993"; transcript_name "TCONS_00000061"; gene_biotype "protein_coding"; class_code "j"; transcript_id "TCONS_00000061"; gene_name "Imp4"; transcript_biotype "protein_coding"
NC_000067.7	Novogene	exon	34482850	34483004	.	+	.	nearest_ref "NM_178601.3"; exon_number "10"; gene_id "27993"; transcript_name "TCONS_00000061"; gene_biotype "protein_coding"; class_code "j"; transcript_id "TCONS_00000061"; gene_name "Imp4"; transcript_biotype "protein_coding"
NC_000067.7	Novogene	exon	34483078	34483172	.	+	.	nearest_ref "NM_178601.3"; exon_number "11"; gene_id "27993"; transcript_name "TCONS_00000061"; gene_biotype "protein_coding"; class_code "j"; transcript_id "TCONS_00000061"; gene_name "Imp4"; transcript_biotype "protein_coding"
NC_000067.7	Novogene	exon	34483277	34483350	.	+	.	nearest_ref "NM_178601.3"; exon_number "12"; gene_id "27993"; transcript_name "TCONS_00000061"; gene_biotype "protein_coding"; class_code "j"; transcript_id "TCONS_00000061"; gene_name "Imp4"; transcript_biotype "protein_coding"
NC_000067.7	Novogene	exon	34483439	34484828	.	+	.	nearest_ref "NM_178601.3"; exon_number "13"; gene_id "27993"; transcript_name "TCONS_00000061"; gene_biotype "protein_coding"; class_code "j"; transcript_id "TCONS_00000061"; gene_name "Imp4"; transcript_biotype "protein_coding"
NC_000067.7	Novogene	exon	38037091	38037405	.	+	.	nearest_ref "NM_198303.2"; exon_number "1"; gene_id "226982"; transcript_name "TCONS_00000085"; gene_biotype "protein_coding"; class_code "j"; transcript_id "TCONS_00000085"; gene_name "Eif5b"; transcript_biotype "protein_coding"
NC_000067.7	Novogene	exon	38056887	38057012	.	+	.	nearest_ref "NM_198303.2"; exon_number "2"; gene_id "226982"; transcript_name "TCONS_00000085"; gene_biotype "protein_coding"; class_code "j"; transcript_id "TCONS_00000085"; gene_name "Eif5b"; transcript_biotype "protein_coding"
NC_000067.7	Novogene	exon	38057106	38057190	.	+	.	nearest_ref "NM_198303.2"; exon_number "3"; gene_id "226982"; transcript_name "TCONS_00000085"; gene_biotype "protein_coding"; class_code "j"; transcript_id "TCONS_00000085"; gene_name "Eif5b"; transcript_biotype "protein_coding"
NC_000067.7	Novogene	exon	38057946	38058615	.	+	.	nearest_ref "NM_198303.2"; exon_number "4"; gene_id "226982"; transcript_name "TCONS_00000085"; gene_biotype "protein_coding"; class_code "j"; transcript_id "TCONS_00000085"; gene_name "Eif5b"; transcript_biotype "protein_coding"
NC_000067.7	Novogene	exon	38060675	38060892	.	+	.	nearest_ref "NM_198303.2"; exon_number "5"; gene_id "226982"; transcript_name "TCONS_00000085"; gene_biotype "protein_coding"; class_code "j"; transcript_id "TCONS_00000085"; gene_name "Eif5b"; transcript_biotype "protein_coding"
NC_000067.7	Novogene	exon	38061245	38061395	.	+	.	nearest_ref "NM_198303.2"; exon_number "6"; gene_id "226982"; transcript_name "TCONS_00000085"; gene_biotype "protein_coding"; class_code "j"; transcript_id "TCONS_00000085"; gene_name "Eif5b"; transcript_biotype "protein_coding"
NC_000067.7	Novogene	exon	38071358	38071456	.	+	.	nearest_ref "NM_198303.2"; exon_number "7"; gene_id "226982"; transcript_name "TCONS_00000085"; gene_biotype "protein_coding"; class_code "j"; transcript_id "TCONS_00000085"; gene_name "Eif5b"; transcript_biotype "protein_coding"
NC_000067.7	Novogene	exon	38072149	38072238	.	+	.	nearest_ref "NM_198303.2"; exon_number "8"; gene_id "226982"; transcript_name "TCONS_00000085"; gene_biotype "protein_coding"; class_code "j"; transcript_id "TCONS_00000085"; gene_name "Eif5b"; transcript_biotype "protein_coding"
NC_000067.7	Novogene	exon	38073110	38073184	.	+	.	nearest_ref "NM_198303.2"; exon_number "9"; gene_id "226982"; transcript_name "TCONS_00000085"; gene_biotype "protein_coding"; class_code "j"; transcript_id "TCONS_00000085"; gene_name "Eif5b"; transcript_biotype "protein_coding"
NC_000067.7	Novogene	exon	38075074	38075354	.	+	.	nearest_ref "NM_198303.2"; exon_number "10"; gene_id "226982"; transcript_name "TCONS_00000085"; gene_biotype "protein_coding"; class_code "j"; transcript_id "TCONS_00000085"; gene_name "Eif5b"; transcript_biotype "protein_coding"
NC_000067.7	Novogene	exon	38076284	38076391	.	+	.	nearest_ref "NM_198303.2"; exon_number "11"; gene_id "226982"; transcript_name "TCONS_00000085"; gene_biotype "protein_coding"; class_code "j"; transcript_id "TCONS_00000085"; gene_name "Eif5b"; transcript_biotype "protein_coding"
NC_000067.7	Novogene	exon	38076628	38076738	.	+	.	nearest_ref "NM_198303.2"; exon_number "12"; gene_id "226982"; transcript_name "TCONS_00000085"; gene_biotype "protein_coding"; class_code "j"; transcript_id "TCONS_00000085"; gene_name "Eif5b"; transcript_biotype "protein_coding"
NC_000067.7	Novogene	exon	38079754	38079821	.	+	.	nearest_ref "NM_198303.2"; exon_number "13"; gene_id "226982"; transcript_name "TCONS_00000085"; gene_biotype "protein_coding"; class_code "j"; transcript_id "TCONS_00000085"; gene_name "Eif5b"; transcript_biotype "protein_coding"
NC_000067.7	Novogene	exon	38080778	38080919	.	+	.	nearest_ref "NM_198303.2"; exon_number "14"; gene_id "226982"; transcript_name "TCONS_00000085"; gene_biotype "protein_coding"; class_code "j"; transcript_id "TCONS_00000085"; gene_name "Eif5b"; transcript_biotype "protein_coding"
NC_000067.7	Novogene	exon	38083785	38083916	.	+	.	nearest_ref "NM_198303.2"; exon_number "15"; gene_id "226982"; transcript_name "TCONS_00000085"; gene_biotype "protein_coding"; class_code "j"; transcript_id "TCONS_00000085"; gene_name "Eif5b"; transcript_biotype "protein_coding"
NC_000067.7	Novogene	exon	38084405	38084587	.	+	.	nearest_ref "NM_198303.2"; exon_number "16"; gene_id "226982"; transcript_name "TCONS_00000085"; gene_biotype "protein_coding"; class_code "j"; transcript_id "TCONS_00000085"; gene_name "Eif5b"; transcript_biotype "protein_coding"
NC_000067.7	Novogene	exon	38084729	38084890	.	+	.	nearest_ref "NM_198303.2"; exon_number "17"; gene_id "226982"; transcript_name "TCONS_00000085"; gene_biotype "protein_coding"; class_code "j"; transcript_id "TCONS_00000085"; gene_name "Eif5b"; transcript_biotype "protein_coding"
NC_000067.7	Novogene	exon	38085693	38085824	.	+	.	nearest_ref "NM_198303.2"; exon_number "18"; gene_id "226982"; transcript_name "TCONS_00000085"; gene_biotype "protein_coding"; class_code "j"; transcript_id "TCONS_00000085"; gene_name "Eif5b"; transcript_biotype "protein_coding"
NC_000067.7	Novogene	exon	38087874	38088005	.	+	.	nearest_ref "NM_198303.2"; exon_number "19"; gene_id "226982"; transcript_name "TCONS_00000085"; gene_biotype "protein_coding"; class_code "j"; transcript_id "TCONS_00000085"; gene_name "Eif5b"; transcript_biotype "protein_coding"
NC_000067.7	Novogene	exon	38088098	38088174	.	+	.	nearest_ref "NM_198303.2"; exon_number "20"; gene_id "226982"; transcript_name "TCONS_00000085"; gene_biotype "protein_coding"; class_code "j"; transcript_id "TCONS_00000085"; gene_name "Eif5b"; transcript_biotype "protein_coding"
NC_000067.7	Novogene	exon	38088257	38088421	.	+	.	nearest_ref "NM_198303.2"; exon_number "21"; gene_id "226982"; transcript_name "TCONS_00000085"; gene_biotype "protein_coding"; class_code "j"; transcript_id "TCONS_00000085"; gene_name "Eif5b"; transcript_biotype "protein_coding"
NC_000067.7	Novogene	exon	38089268	38089406	.	+	.	nearest_ref "NM_198303.2"; exon_number "22"; gene_id "226982"; transcript_name "TCONS_00000085"; gene_biotype "protein_coding"; class_code "j"; transcript_id "TCONS_00000085"; gene_name "Eif5b"; transcript_biotype "protein_coding"
NC_000067.7	Novogene	exon	38090204	38090365	.	+	.	nearest_ref "NM_198303.2"; exon_number "23"; gene_id "226982"; transcript_name "TCONS_00000085"; gene_biotype "protein_coding"; class_code "j"; transcript_id "TCONS_00000085"; gene_name "Eif5b"; transcript_biotype "protein_coding"
NC_000067.7	Novogene	exon	38090687	38092279	.	+	.	nearest_ref "NM_198303.2"; exon_number "24"; gene_id "226982"; transcript_name "TCONS_00000085"; gene_biotype "protein_coding"; class_code "j"; transcript_id "TCONS_00000085"; gene_name "Eif5b"; transcript_biotype "protein_coding"
NC_000067.7	Novogene	exon	38092697	38093077	.	+	.	nearest_ref "NM_198303.2"; exon_number "25"; gene_id "226982"; transcript_name "TCONS_00000085"; gene_biotype "protein_coding"; class_code "j"; transcript_id "TCONS_00000085"; gene_name "Eif5b"; transcript_biotype "protein_coding"
NC_000067.7	Novogene	exon	38093165	38093376	.	+	.	nearest_ref "NM_198303.2"; exon_number "26"; gene_id "226982"; transcript_name "TCONS_00000085"; gene_biotype "protein_coding"; class_code "j"; transcript_id "TCONS_00000085"; gene_name "Eif5b"; transcript_biotype "protein_coding"
NC_000067.7	Novogene	exon	38093826	38093946	.	+	.	nearest_ref "NM_198303.2"; exon_number "27"; gene_id "226982"; transcript_name "TCONS_00000085"; gene_biotype "protein_coding"; class_code "j"; transcript_id "TCONS_00000085"; gene_name "Eif5b"; transcript_biotype "protein_coding"
NC_000067.7	Novogene	exon	38094372	38094605	.	+	.	nearest_ref "NM_198303.2"; exon_number "28"; gene_id "226982"; transcript_name "TCONS_00000085"; gene_biotype "protein_coding"; class_code "j"; transcript_id "TCONS_00000085"; gene_name "Eif5b"; transcript_biotype "protein_coding"
NC_000067.7	Novogene	exon	38095345	38095601	.	+	.	nearest_ref "NM_198303.2"; exon_number "29"; gene_id "226982"; transcript_name "TCONS_00000085"; gene_biotype "protein_coding"; class_code "j"; transcript_id "TCONS_00000085"; gene_name "Eif5b"; transcript_biotype "protein_coding"
NC_000067.7	Novogene	exon	38037196	38037405	.	+	.	nearest_ref "NM_198303.2"; exon_number "1"; gene_id "226982"; transcript_name "TCONS_00000086"; gene_biotype "protein_coding"; class_code "j"; transcript_id "TCONS_00000086"; gene_name "Eif5b"; transcript_biotype "protein_coding"
NC_000067.7	Novogene	exon	38056887	38057012	.	+	.	nearest_ref "NM_198303.2"; exon_number "2"; gene_id "226982"; transcript_name "TCONS_00000086"; gene_biotype "protein_coding"; class_code "j"; transcript_id "TCONS_00000086"; gene_name "Eif5b"; transcript_biotype "protein_coding"
NC_000067.7	Novogene	exon	38057106	38057190	.	+	.	nearest_ref "NM_198303.2"; exon_number "3"; gene_id "226982"; transcript_name "TCONS_00000086"; gene_biotype "protein_coding"; class_code "j"; transcript_id "TCONS_00000086"; gene_name "Eif5b"; transcript_biotype "protein_coding"
NC_000067.7	Novogene	exon	38057946	38058615	.	+	.	nearest_ref "NM_198303.2"; exon_number "4"; gene_id "226982"; transcript_name "TCONS_00000086"; gene_biotype "protein_coding"; class_code "j"; transcript_id "TCONS_00000086"; gene_name "Eif5b"; transcript_biotype "protein_coding"
NC_000067.7	Novogene	exon	38060675	38060892	.	+	.	nearest_ref "NM_198303.2"; exon_number "5"; gene_id "226982"; transcript_name "TCONS_00000086"; gene_biotype "protein_coding"; class_code "j"; transcript_id "TCONS_00000086"; gene_name "Eif5b"; transcript_biotype "protein_coding"
NC_000067.7	Novogene	exon	38061245	38061395	.	+	.	nearest_ref "NM_198303.2"; exon_number "6"; gene_id "226982"; transcript_name "TCONS_00000086"; gene_biotype "protein_coding"; class_code "j"; transcript_id "TCONS_00000086"; gene_name "Eif5b"; transcript_biotype "protein_coding"
NC_000067.7	Novogene	exon	38071358	38071456	.	+	.	nearest_ref "NM_198303.2"; exon_number "7"; gene_id "226982"; transcript_name "TCONS_00000086"; gene_biotype "protein_coding"; class_code "j"; transcript_id "TCONS_00000086"; gene_name "Eif5b"; transcript_biotype "protein_coding"
NC_000067.7	Novogene	exon	38072149	38072238	.	+	.	nearest_ref "NM_198303.2"; exon_number "8"; gene_id "226982"; transcript_name "TCONS_00000086"; gene_biotype "protein_coding"; class_code "j"; transcript_id "TCONS_00000086"; gene_name "Eif5b"; transcript_biotype "protein_coding"
NC_000067.7	Novogene	exon	38073110	38073184	.	+	.	nearest_ref "NM_198303.2"; exon_number "9"; gene_id "226982"; transcript_name "TCONS_00000086"; gene_biotype "protein_coding"; class_code "j"; transcript_id "TCONS_00000086"; gene_name "Eif5b"; transcript_biotype "protein_coding"
NC_000067.7	Novogene	exon	38075074	38075354	.	+	.	nearest_ref "NM_198303.2"; exon_number "10"; gene_id "226982"; transcript_name "TCONS_00000086"; gene_biotype "protein_coding"; class_code "j"; transcript_id "TCONS_00000086"; gene_name "Eif5b"; transcript_biotype "protein_coding"
NC_000067.7	Novogene	exon	38076284	38076391	.	+	.	nearest_ref "NM_198303.2"; exon_number "11"; gene_id "226982"; transcript_name "TCONS_00000086"; gene_biotype "protein_coding"; class_code "j"; transcript_id "TCONS_00000086"; gene_name "Eif5b"; transcript_biotype "protein_coding"
NC_000067.7	Novogene	exon	38076628	38076738	.	+	.	nearest_ref "NM_198303.2"; exon_number "12"; gene_id "226982"; transcript_name "TCONS_00000086"; gene_biotype "protein_coding"; class_code "j"; transcript_id "TCONS_00000086"; gene_name "Eif5b"; transcript_biotype "protein_coding"
NC_000067.7	Novogene	exon	38079754	38079821	.	+	.	nearest_ref "NM_198303.2"; exon_number "13"; gene_id "226982"; transcript_name "TCONS_00000086"; gene_biotype "protein_coding"; class_code "j"; transcript_id "TCONS_00000086"; gene_name "Eif5b"; transcript_biotype "protein_coding"
NC_000067.7	Novogene	exon	38080778	38080919	.	+	.	nearest_ref "NM_198303.2"; exon_number "14"; gene_id "226982"; transcript_name "TCONS_00000086"; gene_biotype "protein_coding"; class_code "j"; transcript_id "TCONS_00000086"; gene_name "Eif5b"; transcript_biotype "protein_coding"
NC_000067.7	Novogene	exon	38083785	38083916	.	+	.	nearest_ref "NM_198303.2"; exon_number "15"; gene_id "226982"; transcript_name "TCONS_00000086"; gene_biotype "protein_coding"; class_code "j"; transcript_id "TCONS_00000086"; gene_name "Eif5b"; transcript_biotype "protein_coding"
NC_000067.7	Novogene	exon	38084405	38084587	.	+	.	nearest_ref "NM_198303.2"; exon_number "16"; gene_id "226982"; transcript_name "TCONS_00000086"; gene_biotype "protein_coding"; class_code "j"; transcript_id "TCONS_00000086"; gene_name "Eif5b"; transcript_biotype "protein_coding"
NC_000067.7	Novogene	exon	38084729	38084890	.	+	.	nearest_ref "NM_198303.2"; exon_number "17"; gene_id "226982"; transcript_name "TCONS_00000086"; gene_biotype "protein_coding"; class_code "j"; transcript_id "TCONS_00000086"; gene_name "Eif5b"; transcript_biotype "protein_coding"
NC_000067.7	Novogene	exon	38085693	38085824	.	+	.	nearest_ref "NM_198303.2"; exon_number "18"; gene_id "226982"; transcript_name "TCONS_00000086"; gene_biotype "protein_coding"; class_code "j"; transcript_id "TCONS_00000086"; gene_name "Eif5b"; transcript_biotype "protein_coding"
NC_000067.7	Novogene	exon	38087874	38088005	.	+	.	nearest_ref "NM_198303.2"; exon_number "19"; gene_id "226982"; transcript_name "TCONS_00000086"; gene_biotype "protein_coding"; class_code "j"; transcript_id "TCONS_00000086"; gene_name "Eif5b"; transcript_biotype "protein_coding"
NC_000067.7	Novogene	exon	38088098	38088174	.	+	.	nearest_ref "NM_198303.2"; exon_number "20"; gene_id "226982"; transcript_name "TCONS_00000086"; gene_biotype "protein_coding"; class_code "j"; transcript_id "TCONS_00000086"; gene_name "Eif5b"; transcript_biotype "protein_coding"
NC_000067.7	Novogene	exon	38088257	38088421	.	+	.	nearest_ref "NM_198303.2"; exon_number "21"; gene_id "226982"; transcript_name "TCONS_00000086"; gene_biotype "protein_coding"; class_code "j"; transcript_id "TCONS_00000086"; gene_name "Eif5b"; transcript_biotype "protein_coding"
NC_000067.7	Novogene	exon	38089268	38089406	.	+	.	nearest_ref "NM_198303.2"; exon_number "22"; gene_id "226982"; transcript_name "TCONS_00000086"; gene_biotype "protein_coding"; class_code "j"; transcript_id "TCONS_00000086"; gene_name "Eif5b"; transcript_biotype "protein_coding"
NC_000067.7	Novogene	exon	38090204	38090365	.	+	.	nearest_ref "NM_198303.2"; exon_number "23"; gene_id "226982"; transcript_name "TCONS_00000086"; gene_biotype "protein_coding"; class_code "j"; transcript_id "TCONS_00000086"; gene_name "Eif5b"; transcript_biotype "protein_coding"
NC_000067.7	Novogene	exon	38090687	38092279	.	+	.	nearest_ref "NM_198303.2"; exon_number "24"; gene_id "226982"; transcript_name "TCONS_00000086"; gene_biotype "protein_coding"; class_code "j"; transcript_id "TCONS_00000086"; gene_name "Eif5b"; transcript_biotype "protein_coding"
NC_000067.7	Novogene	exon	38092697	38092799	.	+	.	nearest_ref "NM_198303.2"; exon_number "25"; gene_id "226982"; transcript_name "TCONS_00000086"; gene_biotype "protein_coding"; class_code "j"; transcript_id "TCONS_00000086"; gene_name "Eif5b"; transcript_biotype "protein_coding"
NC_000067.7	Novogene	exon	38092921	38093077	.	+	.	nearest_ref "NM_198303.2"; exon_number "26"; gene_id "226982"; transcript_name "TCONS_00000086"; gene_biotype "protein_coding"; class_code "j"; transcript_id "TCONS_00000086"; gene_name "Eif5b"; transcript_biotype "protein_coding"
NC_000067.7	Novogene	exon	38093165	38094653	.	+	.	nearest_ref "NM_198303.2"; exon_number "27"; gene_id "226982"; transcript_name "TCONS_00000086"; gene_biotype "protein_coding"; class_code "j"; transcript_id "TCONS_00000086"; gene_name "Eif5b"; transcript_biotype "protein_coding"
NC_000067.7	Novogene	exon	38037199	38037405	.	+	.	nearest_ref "NM_198303.2"; exon_number "1"; gene_id "226982"; transcript_name "TCONS_00000087"; gene_biotype "protein_coding"; class_code "j"; transcript_id "TCONS_00000087"; gene_name "Eif5b"; transcript_biotype "protein_coding"
NC_000067.7	Novogene	exon	38056887	38057012	.	+	.	nearest_ref "NM_198303.2"; exon_number "2"; gene_id "226982"; transcript_name "TCONS_00000087"; gene_biotype "protein_coding"; class_code "j"; transcript_id "TCONS_00000087"; gene_name "Eif5b"; transcript_biotype "protein_coding"
NC_000067.7	Novogene	exon	38057106	38057190	.	+	.	nearest_ref "NM_198303.2"; exon_number "3"; gene_id "226982"; transcript_name "TCONS_00000087"; gene_biotype "protein_coding"; class_code "j"; transcript_id "TCONS_00000087"; gene_name "Eif5b"; transcript_biotype "protein_coding"
NC_000067.7	Novogene	exon	38057946	38058615	.	+	.	nearest_ref "NM_198303.2"; exon_number "4"; gene_id "226982"; transcript_name "TCONS_00000087"; gene_biotype "protein_coding"; class_code "j"; transcript_id "TCONS_00000087"; gene_name "Eif5b"; transcript_biotype "protein_coding"
NC_000067.7	Novogene	exon	38060675	38060892	.	+	.	nearest_ref "NM_198303.2"; exon_number "5"; gene_id "226982"; transcript_name "TCONS_00000087"; gene_biotype "protein_coding"; class_code "j"; transcript_id "TCONS_00000087"; gene_name "Eif5b"; transcript_biotype "protein_coding"
NC_000067.7	Novogene	exon	38061245	38061395	.	+	.	nearest_ref "NM_198303.2"; exon_number "6"; gene_id "226982"; transcript_name "TCONS_00000087"; gene_biotype "protein_coding"; class_code "j"; transcript_id "TCONS_00000087"; gene_name "Eif5b"; transcript_biotype "protein_coding"
NC_000067.7	Novogene	exon	38071358	38071456	.	+	.	nearest_ref "NM_198303.2"; exon_number "7"; gene_id "226982"; transcript_name "TCONS_00000087"; gene_biotype "protein_coding"; class_code "j"; transcript_id "TCONS_00000087"; gene_name "Eif5b"; transcript_biotype "protein_coding"
NC_000067.7	Novogene	exon	38072149	38072238	.	+	.	nearest_ref "NM_198303.2"; exon_number "8"; gene_id "226982"; transcript_name "TCONS_00000087"; gene_biotype "protein_coding"; class_code "j"; transcript_id "TCONS_00000087"; gene_name "Eif5b"; transcript_biotype "protein_coding"
NC_000067.7	Novogene	exon	38073110	38073184	.	+	.	nearest_ref "NM_198303.2"; exon_number "9"; gene_id "226982"; transcript_name "TCONS_00000087"; gene_biotype "protein_coding"; class_code "j"; transcript_id "TCONS_00000087"; gene_name "Eif5b"; transcript_biotype "protein_coding"
NC_000067.7	Novogene	exon	38075074	38075354	.	+	.	nearest_ref "NM_198303.2"; exon_number "10"; gene_id "226982"; transcript_name "TCONS_00000087"; gene_biotype "protein_coding"; class_code "j"; transcript_id "TCONS_00000087"; gene_name "Eif5b"; transcript_biotype "protein_coding"
NC_000067.7	Novogene	exon	38076284	38076391	.	+	.	nearest_ref "NM_198303.2"; exon_number "11"; gene_id "226982"; transcript_name "TCONS_00000087"; gene_biotype "protein_coding"; class_code "j"; transcript_id "TCONS_00000087"; gene_name "Eif5b"; transcript_biotype "protein_coding"
NC_000067.7	Novogene	exon	38076628	38076738	.	+	.	nearest_ref "NM_198303.2"; exon_number "12"; gene_id "226982"; transcript_name "TCONS_00000087"; gene_biotype "protein_coding"; class_code "j"; transcript_id "TCONS_00000087"; gene_name "Eif5b"; transcript_biotype "protein_coding"
NC_000067.7	Novogene	exon	38079754	38079821	.	+	.	nearest_ref "NM_198303.2"; exon_number "13"; gene_id "226982"; transcript_name "TCONS_00000087"; gene_biotype "protein_coding"; class_code "j"; transcript_id "TCONS_00000087"; gene_name "Eif5b"; transcript_biotype "protein_coding"
NC_000067.7	Novogene	exon	38080778	38080919	.	+	.	nearest_ref "NM_198303.2"; exon_number "14"; gene_id "226982"; transcript_name "TCONS_00000087"; gene_biotype "protein_coding"; class_code "j"; transcript_id "TCONS_00000087"; gene_name "Eif5b"; transcript_biotype "protein_coding"
NC_000067.7	Novogene	exon	38083785	38083916	.	+	.	nearest_ref "NM_198303.2"; exon_number "15"; gene_id "226982"; transcript_name "TCONS_00000087"; gene_biotype "protein_coding"; class_code "j"; transcript_id "TCONS_00000087"; gene_name "Eif5b"; transcript_biotype "protein_coding"
NC_000067.7	Novogene	exon	38084405	38084587	.	+	.	nearest_ref "NM_198303.2"; exon_number "16"; gene_id "226982"; transcript_name "TCONS_00000087"; gene_biotype "protein_coding"; class_code "j"; transcript_id "TCONS_00000087"; gene_name "Eif5b"; transcript_biotype "protein_coding"
NC_000067.7	Novogene	exon	38084729	38084890	.	+	.	nearest_ref "NM_198303.2"; exon_number "17"; gene_id "226982"; transcript_name "TCONS_00000087"; gene_biotype "protein_coding"; class_code "j"; transcript_id "TCONS_00000087"; gene_name "Eif5b"; transcript_biotype "protein_coding"
NC_000067.7	Novogene	exon	38085693	38085824	.	+	.	nearest_ref "NM_198303.2"; exon_number "18"; gene_id "226982"; transcript_name "TCONS_00000087"; gene_biotype "protein_coding"; class_code "j"; transcript_id "TCONS_00000087"; gene_name "Eif5b"; transcript_biotype "protein_coding"
NC_000067.7	Novogene	exon	38087874	38088005	.	+	.	nearest_ref "NM_198303.2"; exon_number "19"; gene_id "226982"; transcript_name "TCONS_00000087"; gene_biotype "protein_coding"; class_code "j"; transcript_id "TCONS_00000087"; gene_name "Eif5b"; transcript_biotype "protein_coding"
NC_000067.7	Novogene	exon	38088098	38088174	.	+	.	nearest_ref "NM_198303.2"; exon_number "20"; gene_id "226982"; transcript_name "TCONS_00000087"; gene_biotype "protein_coding"; class_code "j"; transcript_id "TCONS_00000087"; gene_name "Eif5b"; transcript_biotype "protein_coding"
NC_000067.7	Novogene	exon	38088257	38088421	.	+	.	nearest_ref "NM_198303.2"; exon_number "21"; gene_id "226982"; transcript_name "TCONS_00000087"; gene_biotype "protein_coding"; class_code "j"; transcript_id "TCONS_00000087"; gene_name "Eif5b"; transcript_biotype "protein_coding"
NC_000067.7	Novogene	exon	38089268	38089406	.	+	.	nearest_ref "NM_198303.2"; exon_number "22"; gene_id "226982"; transcript_name "TCONS_00000087"; gene_biotype "protein_coding"; class_code "j"; transcript_id "TCONS_00000087"; gene_name "Eif5b"; transcript_biotype "protein_coding"
NC_000067.7	Novogene	exon	38090204	38090365	.	+	.	nearest_ref "NM_198303.2"; exon_number "23"; gene_id "226982"; transcript_name "TCONS_00000087"; gene_biotype "protein_coding"; class_code "j"; transcript_id "TCONS_00000087"; gene_name "Eif5b"; transcript_biotype "protein_coding"
NC_000067.7	Novogene	exon	38090687	38093376	.	+	.	nearest_ref "NM_198303.2"; exon_number "24"; gene_id "226982"; transcript_name "TCONS_00000087"; gene_biotype "protein_coding"; class_code "j"; transcript_id "TCONS_00000087"; gene_name "Eif5b"; transcript_biotype "protein_coding"
NC_000067.7	Novogene	exon	38093826	38093946	.	+	.	nearest_ref "NM_198303.2"; exon_number "25"; gene_id "226982"; transcript_name "TCONS_00000087"; gene_biotype "protein_coding"; class_code "j"; transcript_id "TCONS_00000087"; gene_name "Eif5b"; transcript_biotype "protein_coding"
NC_000067.7	Novogene	exon	38094372	38094605	.	+	.	nearest_ref "NM_198303.2"; exon_number "26"; gene_id "226982"; transcript_name "TCONS_00000087"; gene_biotype "protein_coding"; class_code "j"; transcript_id "TCONS_00000087"; gene_name "Eif5b"; transcript_biotype "protein_coding"
NC_000067.7	Novogene	exon	38095345	38095547	.	+	.	nearest_ref "NM_198303.2"; exon_number "27"; gene_id "226982"; transcript_name "TCONS_00000087"; gene_biotype "protein_coding"; class_code "j"; transcript_id "TCONS_00000087"; gene_name "Eif5b"; transcript_biotype "protein_coding"
NC_000067.7	Novogene	exon	38095798	38095943	.	+	.	nearest_ref "NM_198303.2"; exon_number "28"; gene_id "226982"; transcript_name "TCONS_00000087"; gene_biotype "protein_coding"; class_code "j"; transcript_id "TCONS_00000087"; gene_name "Eif5b"; transcript_biotype "protein_coding"
NC_000067.7	Novogene	exon	38037227	38037405	.	+	.	nearest_ref "NM_198303.2"; exon_number "1"; gene_id "226982"; transcript_name "TCONS_00000088"; gene_biotype "protein_coding"; class_code "j"; transcript_id "TCONS_00000088"; gene_name "Eif5b"; transcript_biotype "protein_coding"
NC_000067.7	Novogene	exon	38056887	38057012	.	+	.	nearest_ref "NM_198303.2"; exon_number "2"; gene_id "226982"; transcript_name "TCONS_00000088"; gene_biotype "protein_coding"; class_code "j"; transcript_id "TCONS_00000088"; gene_name "Eif5b"; transcript_biotype "protein_coding"
NC_000067.7	Novogene	exon	38057106	38057190	.	+	.	nearest_ref "NM_198303.2"; exon_number "3"; gene_id "226982"; transcript_name "TCONS_00000088"; gene_biotype "protein_coding"; class_code "j"; transcript_id "TCONS_00000088"; gene_name "Eif5b"; transcript_biotype "protein_coding"
NC_000067.7	Novogene	exon	38057946	38058615	.	+	.	nearest_ref "NM_198303.2"; exon_number "4"; gene_id "226982"; transcript_name "TCONS_00000088"; gene_biotype "protein_coding"; class_code "j"; transcript_id "TCONS_00000088"; gene_name "Eif5b"; transcript_biotype "protein_coding"
NC_000067.7	Novogene	exon	38060675	38060892	.	+	.	nearest_ref "NM_198303.2"; exon_number "5"; gene_id "226982"; transcript_name "TCONS_00000088"; gene_biotype "protein_coding"; class_code "j"; transcript_id "TCONS_00000088"; gene_name "Eif5b"; transcript_biotype "protein_coding"
NC_000067.7	Novogene	exon	38061245	38061395	.	+	.	nearest_ref "NM_198303.2"; exon_number "6"; gene_id "226982"; transcript_name "TCONS_00000088"; gene_biotype "protein_coding"; class_code "j"; transcript_id "TCONS_00000088"; gene_name "Eif5b"; transcript_biotype "protein_coding"
NC_000067.7	Novogene	exon	38071358	38071456	.	+	.	nearest_ref "NM_198303.2"; exon_number "7"; gene_id "226982"; transcript_name "TCONS_00000088"; gene_biotype "protein_coding"; class_code "j"; transcript_id "TCONS_00000088"; gene_name "Eif5b"; transcript_biotype "protein_coding"
NC_000067.7	Novogene	exon	38072149	38072238	.	+	.	nearest_ref "NM_198303.2"; exon_number "8"; gene_id "226982"; transcript_name "TCONS_00000088"; gene_biotype "protein_coding"; class_code "j"; transcript_id "TCONS_00000088"; gene_name "Eif5b"; transcript_biotype "protein_coding"
NC_000067.7	Novogene	exon	38073110	38073184	.	+	.	nearest_ref "NM_198303.2"; exon_number "9"; gene_id "226982"; transcript_name "TCONS_00000088"; gene_biotype "protein_coding"; class_code "j"; transcript_id "TCONS_00000088"; gene_name "Eif5b"; transcript_biotype "protein_coding"
NC_000067.7	Novogene	exon	38075074	38075354	.	+	.	nearest_ref "NM_198303.2"; exon_number "10"; gene_id "226982"; transcript_name "TCONS_00000088"; gene_biotype "protein_coding"; class_code "j"; transcript_id "TCONS_00000088"; gene_name "Eif5b"; transcript_biotype "protein_coding"
NC_000067.7	Novogene	exon	38076284	38076391	.	+	.	nearest_ref "NM_198303.2"; exon_number "11"; gene_id "226982"; transcript_name "TCONS_00000088"; gene_biotype "protein_coding"; class_code "j"; transcript_id "TCONS_00000088"; gene_name "Eif5b"; transcript_biotype "protein_coding"
NC_000067.7	Novogene	exon	38076628	38076738	.	+	.	nearest_ref "NM_198303.2"; exon_number "12"; gene_id "226982"; transcript_name "TCONS_00000088"; gene_biotype "protein_coding"; class_code "j"; transcript_id "TCONS_00000088"; gene_name "Eif5b"; transcript_biotype "protein_coding"
NC_000067.7	Novogene	exon	38079754	38079821	.	+	.	nearest_ref "NM_198303.2"; exon_number "13"; gene_id "226982"; transcript_name "TCONS_00000088"; gene_biotype "protein_coding"; class_code "j"; transcript_id "TCONS_00000088"; gene_name "Eif5b"; transcript_biotype "protein_coding"
NC_000067.7	Novogene	exon	38080778	38080919	.	+	.	nearest_ref "NM_198303.2"; exon_number "14"; gene_id "226982"; transcript_name "TCONS_00000088"; gene_biotype "protein_coding"; class_code "j"; transcript_id "TCONS_00000088"; gene_name "Eif5b"; transcript_biotype "protein_coding"
NC_000067.7	Novogene	exon	38083785	38083916	.	+	.	nearest_ref "NM_198303.2"; exon_number "15"; gene_id "226982"; transcript_name "TCONS_00000088"; gene_biotype "protein_coding"; class_code "j"; transcript_id "TCONS_00000088"; gene_name "Eif5b"; transcript_biotype "protein_coding"
NC_000067.7	Novogene	exon	38084405	38084587	.	+	.	nearest_ref "NM_198303.2"; exon_number "16"; gene_id "226982"; transcript_name "TCONS_00000088"; gene_biotype "protein_coding"; class_code "j"; transcript_id "TCONS_00000088"; gene_name "Eif5b"; transcript_biotype "protein_coding"
NC_000067.7	Novogene	exon	38084729	38084890	.	+	.	nearest_ref "NM_198303.2"; exon_number "17"; gene_id "226982"; transcript_name "TCONS_00000088"; gene_biotype "protein_coding"; class_code "j"; transcript_id "TCONS_00000088"; gene_name "Eif5b"; transcript_biotype "protein_coding"
NC_000067.7	Novogene	exon	38085693	38085824	.	+	.	nearest_ref "NM_198303.2"; exon_number "18"; gene_id "226982"; transcript_name "TCONS_00000088"; gene_biotype "protein_coding"; class_code "j"; transcript_id "TCONS_00000088"; gene_name "Eif5b"; transcript_biotype "protein_coding"
NC_000067.7	Novogene	exon	38087874	38088005	.	+	.	nearest_ref "NM_198303.2"; exon_number "19"; gene_id "226982"; transcript_name "TCONS_00000088"; gene_biotype "protein_coding"; class_code "j"; transcript_id "TCONS_00000088"; gene_name "Eif5b"; transcript_biotype "protein_coding"
NC_000067.7	Novogene	exon	38088098	38088174	.	+	.	nearest_ref "NM_198303.2"; exon_number "20"; gene_id "226982"; transcript_name "TCONS_00000088"; gene_biotype "protein_coding"; class_code "j"; transcript_id "TCONS_00000088"; gene_name "Eif5b"; transcript_biotype "protein_coding"
NC_000067.7	Novogene	exon	38088257	38088421	.	+	.	nearest_ref "NM_198303.2"; exon_number "21"; gene_id "226982"; transcript_name "TCONS_00000088"; gene_biotype "protein_coding"; class_code "j"; transcript_id "TCONS_00000088"; gene_name "Eif5b"; transcript_biotype "protein_coding"
NC_000067.7	Novogene	exon	38089268	38089406	.	+	.	nearest_ref "NM_198303.2"; exon_number "22"; gene_id "226982"; transcript_name "TCONS_00000088"; gene_biotype "protein_coding"; class_code "j"; transcript_id "TCONS_00000088"; gene_name "Eif5b"; transcript_biotype "protein_coding"
NC_000067.7	Novogene	exon	38090204	38090365	.	+	.	nearest_ref "NM_198303.2"; exon_number "23"; gene_id "226982"; transcript_name "TCONS_00000088"; gene_biotype "protein_coding"; class_code "j"; transcript_id "TCONS_00000088"; gene_name "Eif5b"; transcript_biotype "protein_coding"
NC_000067.7	Novogene	exon	38090687	38092279	.	+	.	nearest_ref "NM_198303.2"; exon_number "24"; gene_id "226982"; transcript_name "TCONS_00000088"; gene_biotype "protein_coding"; class_code "j"; transcript_id "TCONS_00000088"; gene_name "Eif5b"; transcript_biotype "protein_coding"
NC_000067.7	Novogene	exon	38092697	38092799	.	+	.	nearest_ref "NM_198303.2"; exon_number "25"; gene_id "226982"; transcript_name "TCONS_00000088"; gene_biotype "protein_coding"; class_code "j"; transcript_id "TCONS_00000088"; gene_name "Eif5b"; transcript_biotype "protein_coding"
NC_000067.7	Novogene	exon	38092921	38093376	.	+	.	nearest_ref "NM_198303.2"; exon_number "26"; gene_id "226982"; transcript_name "TCONS_00000088"; gene_biotype "protein_coding"; class_code "j"; transcript_id "TCONS_00000088"; gene_name "Eif5b"; transcript_biotype "protein_coding"
NC_000067.7	Novogene	exon	38093826	38093946	.	+	.	nearest_ref "NM_198303.2"; exon_number "27"; gene_id "226982"; transcript_name "TCONS_00000088"; gene_biotype "protein_coding"; class_code "j"; transcript_id "TCONS_00000088"; gene_name "Eif5b"; transcript_biotype "protein_coding"
NC_000067.7	Novogene	exon	38094372	38094605	.	+	.	nearest_ref "NM_198303.2"; exon_number "28"; gene_id "226982"; transcript_name "TCONS_00000088"; gene_biotype "protein_coding"; class_code "j"; transcript_id "TCONS_00000088"; gene_name "Eif5b"; transcript_biotype "protein_coding"
NC_000067.7	Novogene	exon	38095345	38095547	.	+	.	nearest_ref "NM_198303.2"; exon_number "29"; gene_id "226982"; transcript_name "TCONS_00000088"; gene_biotype "protein_coding"; class_code "j"; transcript_id "TCONS_00000088"; gene_name "Eif5b"; transcript_biotype "protein_coding"
NC_000067.7	Novogene	exon	38095798	38095943	.	+	.	nearest_ref "NM_198303.2"; exon_number "30"; gene_id "226982"; transcript_name "TCONS_00000088"; gene_biotype "protein_coding"; class_code "j"; transcript_id "TCONS_00000088"; gene_name "Eif5b"; transcript_biotype "protein_coding"
NC_000067.7	Novogene	exon	39940073	39940446	.	+	.	nearest_ref "XM_006496041.3"; exon_number "1"; gene_id "26921"; transcript_name "TCONS_00000110"; gene_biotype "protein_coding"; class_code "j"; transcript_id "TCONS_00000110"; gene_name "Map4k4"; transcript_biotype "protein_coding"
NC_000067.7	Novogene	exon	39940669	39940734	.	+	.	nearest_ref "XM_006496041.3"; exon_number "2"; gene_id "26921"; transcript_name "TCONS_00000110"; gene_biotype "protein_coding"; class_code "j"; transcript_id "TCONS_00000110"; gene_name "Map4k4"; transcript_biotype "protein_coding"
NC_000067.7	Novogene	exon	40001338	40001394	.	+	.	nearest_ref "XM_006496041.3"; exon_number "3"; gene_id "26921"; transcript_name "TCONS_00000110"; gene_biotype "protein_coding"; class_code "j"; transcript_id "TCONS_00000110"; gene_name "Map4k4"; transcript_biotype "protein_coding"
NC_000067.7	Novogene	exon	40013087	40013212	.	+	.	nearest_ref "XM_006496041.3"; exon_number "4"; gene_id "26921"; transcript_name "TCONS_00000110"; gene_biotype "protein_coding"; class_code "j"; transcript_id "TCONS_00000110"; gene_name "Map4k4"; transcript_biotype "protein_coding"
NC_000067.7	Novogene	exon	40015867	40015977	.	+	.	nearest_ref "XM_006496041.3"; exon_number "5"; gene_id "26921"; transcript_name "TCONS_00000110"; gene_biotype "protein_coding"; class_code "j"; transcript_id "TCONS_00000110"; gene_name "Map4k4"; transcript_biotype "protein_coding"
NC_000067.7	Novogene	exon	40019720	40019810	.	+	.	nearest_ref "XM_006496041.3"; exon_number "6"; gene_id "26921"; transcript_name "TCONS_00000110"; gene_biotype "protein_coding"; class_code "j"; transcript_id "TCONS_00000110"; gene_name "Map4k4"; transcript_biotype "protein_coding"
NC_000067.7	Novogene	exon	40022299	40022429	.	+	.	nearest_ref "XM_006496041.3"; exon_number "7"; gene_id "26921"; transcript_name "TCONS_00000110"; gene_biotype "protein_coding"; class_code "j"; transcript_id "TCONS_00000110"; gene_name "Map4k4"; transcript_biotype "protein_coding"
NC_000067.7	Novogene	exon	40023043	40023097	.	+	.	nearest_ref "XM_006496041.3"; exon_number "8"; gene_id "26921"; transcript_name "TCONS_00000110"; gene_biotype "protein_coding"; class_code "j"; transcript_id "TCONS_00000110"; gene_name "Map4k4"; transcript_biotype "protein_coding"
NC_000067.7	Novogene	exon	40024342	40024420	.	+	.	nearest_ref "XM_006496041.3"; exon_number "9"; gene_id "26921"; transcript_name "TCONS_00000110"; gene_biotype "protein_coding"; class_code "j"; transcript_id "TCONS_00000110"; gene_name "Map4k4"; transcript_biotype "protein_coding"
NC_000067.7	Novogene	exon	40025785	40025960	.	+	.	nearest_ref "XM_006496041.3"; exon_number "10"; gene_id "26921"; transcript_name "TCONS_00000110"; gene_biotype "protein_coding"; class_code "j"; transcript_id "TCONS_00000110"; gene_name "Map4k4"; transcript_biotype "protein_coding"
NC_000067.7	Novogene	exon	40028130	40028202	.	+	.	nearest_ref "XM_006496041.3"; exon_number "11"; gene_id "26921"; transcript_name "TCONS_00000110"; gene_biotype "protein_coding"; class_code "j"; transcript_id "TCONS_00000110"; gene_name "Map4k4"; transcript_biotype "protein_coding"
NC_000067.7	Novogene	exon	40029249	40029459	.	+	.	nearest_ref "XM_006496041.3"; exon_number "12"; gene_id "26921"; transcript_name "TCONS_00000110"; gene_biotype "protein_coding"; class_code "j"; transcript_id "TCONS_00000110"; gene_name "Map4k4"; transcript_biotype "protein_coding"
NC_000067.7	Novogene	exon	40036181	40036342	.	+	.	nearest_ref "XM_006496041.3"; exon_number "13"; gene_id "26921"; transcript_name "TCONS_00000110"; gene_biotype "protein_coding"; class_code "j"; transcript_id "TCONS_00000110"; gene_name "Map4k4"; transcript_biotype "protein_coding"
NC_000067.7	Novogene	exon	40039048	40039134	.	+	.	nearest_ref "XM_006496041.3"; exon_number "14"; gene_id "26921"; transcript_name "TCONS_00000110"; gene_biotype "protein_coding"; class_code "j"; transcript_id "TCONS_00000110"; gene_name "Map4k4"; transcript_biotype "protein_coding"
NC_000067.7	Novogene	exon	40039691	40039909	.	+	.	nearest_ref "XM_006496041.3"; exon_number "15"; gene_id "26921"; transcript_name "TCONS_00000110"; gene_biotype "protein_coding"; class_code "j"; transcript_id "TCONS_00000110"; gene_name "Map4k4"; transcript_biotype "protein_coding"
NC_000067.7	Novogene	exon	40043967	40044073	.	+	.	nearest_ref "XM_006496041.3"; exon_number "16"; gene_id "26921"; transcript_name "TCONS_00000110"; gene_biotype "protein_coding"; class_code "j"; transcript_id "TCONS_00000110"; gene_name "Map4k4"; transcript_biotype "protein_coding"
NC_000067.7	Novogene	exon	40045831	40045982	.	+	.	nearest_ref "XM_006496041.3"; exon_number "17"; gene_id "26921"; transcript_name "TCONS_00000110"; gene_biotype "protein_coding"; class_code "j"; transcript_id "TCONS_00000110"; gene_name "Map4k4"; transcript_biotype "protein_coding"
NC_000067.7	Novogene	exon	40046593	40047499	.	+	.	nearest_ref "XM_006496041.3"; exon_number "18"; gene_id "26921"; transcript_name "TCONS_00000110"; gene_biotype "protein_coding"; class_code "j"; transcript_id "TCONS_00000110"; gene_name "Map4k4"; transcript_biotype "protein_coding"
NC_000067.7	Novogene	exon	40048848	40049023	.	+	.	nearest_ref "XM_006496041.3"; exon_number "19"; gene_id "26921"; transcript_name "TCONS_00000110"; gene_biotype "protein_coding"; class_code "j"; transcript_id "TCONS_00000110"; gene_name "Map4k4"; transcript_biotype "protein_coding"
NC_000067.7	Novogene	exon	40049717	40049837	.	+	.	nearest_ref "XM_006496041.3"; exon_number "20"; gene_id "26921"; transcript_name "TCONS_00000110"; gene_biotype "protein_coding"; class_code "j"; transcript_id "TCONS_00000110"; gene_name "Map4k4"; transcript_biotype "protein_coding"
NC_000067.7	Novogene	exon	40053266	40053383	.	+	.	nearest_ref "XM_006496041.3"; exon_number "21"; gene_id "26921"; transcript_name "TCONS_00000110"; gene_biotype "protein_coding"; class_code "j"; transcript_id "TCONS_00000110"; gene_name "Map4k4"; transcript_biotype "protein_coding"
NC_000067.7	Novogene	exon	40053687	40053857	.	+	.	nearest_ref "XM_006496041.3"; exon_number "22"; gene_id "26921"; transcript_name "TCONS_00000110"; gene_biotype "protein_coding"; class_code "j"; transcript_id "TCONS_00000110"; gene_name "Map4k4"; transcript_biotype "protein_coding"
NC_000067.7	Novogene	exon	40056270	40056413	.	+	.	nearest_ref "XM_006496041.3"; exon_number "23"; gene_id "26921"; transcript_name "TCONS_00000110"; gene_biotype "protein_coding"; class_code "j"; transcript_id "TCONS_00000110"; gene_name "Map4k4"; transcript_biotype "protein_coding"
NC_000067.7	Novogene	exon	40058704	40058838	.	+	.	nearest_ref "XM_006496041.3"; exon_number "24"; gene_id "26921"; transcript_name "TCONS_00000110"; gene_biotype "protein_coding"; class_code "j"; transcript_id "TCONS_00000110"; gene_name "Map4k4"; transcript_biotype "protein_coding"
NC_000067.7	Novogene	exon	40060244	40060344	.	+	.	nearest_ref "XM_006496041.3"; exon_number "25"; gene_id "26921"; transcript_name "TCONS_00000110"; gene_biotype "protein_coding"; class_code "j"; transcript_id "TCONS_00000110"; gene_name "Map4k4"; transcript_biotype "protein_coding"
NC_000067.7	Novogene	exon	40061865	40062014	.	+	.	nearest_ref "XM_006496041.3"; exon_number "26"; gene_id "26921"; transcript_name "TCONS_00000110"; gene_biotype "protein_coding"; class_code "j"; transcript_id "TCONS_00000110"; gene_name "Map4k4"; transcript_biotype "protein_coding"
NC_000067.7	Novogene	exon	40062520	40062679	.	+	.	nearest_ref "XM_006496041.3"; exon_number "27"; gene_id "26921"; transcript_name "TCONS_00000110"; gene_biotype "protein_coding"; class_code "j"; transcript_id "TCONS_00000110"; gene_name "Map4k4"; transcript_biotype "protein_coding"
NC_000067.7	Novogene	exon	40063470	40063609	.	+	.	nearest_ref "XM_006496041.3"; exon_number "28"; gene_id "26921"; transcript_name "TCONS_00000110"; gene_biotype "protein_coding"; class_code "j"; transcript_id "TCONS_00000110"; gene_name "Map4k4"; transcript_biotype "protein_coding"
NC_000067.7	Novogene	exon	40063789	40065466	.	+	.	nearest_ref "XM_006496041.3"; exon_number "29"; gene_id "26921"; transcript_name "TCONS_00000110"; gene_biotype "protein_coding"; class_code "j"; transcript_id "TCONS_00000110"; gene_name "Map4k4"; transcript_biotype "protein_coding"
NC_000067.7	Novogene	exon	39940073	39940446	.	+	.	nearest_ref "XM_006496041.3"; exon_number "1"; gene_id "26921"; transcript_name "TCONS_00000109"; gene_biotype "protein_coding"; class_code "j"; transcript_id "TCONS_00000109"; gene_name "Map4k4"; transcript_biotype "protein_coding"
NC_000067.7	Novogene	exon	39940669	39940734	.	+	.	nearest_ref "XM_006496041.3"; exon_number "2"; gene_id "26921"; transcript_name "TCONS_00000109"; gene_biotype "protein_coding"; class_code "j"; transcript_id "TCONS_00000109"; gene_name "Map4k4"; transcript_biotype "protein_coding"
NC_000067.7	Novogene	exon	40001338	40001394	.	+	.	nearest_ref "XM_006496041.3"; exon_number "3"; gene_id "26921"; transcript_name "TCONS_00000109"; gene_biotype "protein_coding"; class_code "j"; transcript_id "TCONS_00000109"; gene_name "Map4k4"; transcript_biotype "protein_coding"
NC_000067.7	Novogene	exon	40013087	40013212	.	+	.	nearest_ref "XM_006496041.3"; exon_number "4"; gene_id "26921"; transcript_name "TCONS_00000109"; gene_biotype "protein_coding"; class_code "j"; transcript_id "TCONS_00000109"; gene_name "Map4k4"; transcript_biotype "protein_coding"
NC_000067.7	Novogene	exon	40015867	40015977	.	+	.	nearest_ref "XM_006496041.3"; exon_number "5"; gene_id "26921"; transcript_name "TCONS_00000109"; gene_biotype "protein_coding"; class_code "j"; transcript_id "TCONS_00000109"; gene_name "Map4k4"; transcript_biotype "protein_coding"
NC_000067.7	Novogene	exon	40019720	40019810	.	+	.	nearest_ref "XM_006496041.3"; exon_number "6"; gene_id "26921"; transcript_name "TCONS_00000109"; gene_biotype "protein_coding"; class_code "j"; transcript_id "TCONS_00000109"; gene_name "Map4k4"; transcript_biotype "protein_coding"
NC_000067.7	Novogene	exon	40022299	40022429	.	+	.	nearest_ref "XM_006496041.3"; exon_number "7"; gene_id "26921"; transcript_name "TCONS_00000109"; gene_biotype "protein_coding"; class_code "j"; transcript_id "TCONS_00000109"; gene_name "Map4k4"; transcript_biotype "protein_coding"
NC_000067.7	Novogene	exon	40023043	40023097	.	+	.	nearest_ref "XM_006496041.3"; exon_number "8"; gene_id "26921"; transcript_name "TCONS_00000109"; gene_biotype "protein_coding"; class_code "j"; transcript_id "TCONS_00000109"; gene_name "Map4k4"; transcript_biotype "protein_coding"
NC_000067.7	Novogene	exon	40024342	40024420	.	+	.	nearest_ref "XM_006496041.3"; exon_number "9"; gene_id "26921"; transcript_name "TCONS_00000109"; gene_biotype "protein_coding"; class_code "j"; transcript_id "TCONS_00000109"; gene_name "Map4k4"; transcript_biotype "protein_coding"
NC_000067.7	Novogene	exon	40025785	40025960	.	+	.	nearest_ref "XM_006496041.3"; exon_number "10"; gene_id "26921"; transcript_name "TCONS_00000109"; gene_biotype "protein_coding"; class_code "j"; transcript_id "TCONS_00000109"; gene_name "Map4k4"; transcript_biotype "protein_coding"
NC_000067.7	Novogene	exon	40028130	40028202	.	+	.	nearest_ref "XM_006496041.3"; exon_number "11"; gene_id "26921"; transcript_name "TCONS_00000109"; gene_biotype "protein_coding"; class_code "j"; transcript_id "TCONS_00000109"; gene_name "Map4k4"; transcript_biotype "protein_coding"
NC_000067.7	Novogene	exon	40029249	40029459	.	+	.	nearest_ref "XM_006496041.3"; exon_number "12"; gene_id "26921"; transcript_name "TCONS_00000109"; gene_biotype "protein_coding"; class_code "j"; transcript_id "TCONS_00000109"; gene_name "Map4k4"; transcript_biotype "protein_coding"
NC_000067.7	Novogene	exon	40036181	40036342	.	+	.	nearest_ref "XM_006496041.3"; exon_number "13"; gene_id "26921"; transcript_name "TCONS_00000109"; gene_biotype "protein_coding"; class_code "j"; transcript_id "TCONS_00000109"; gene_name "Map4k4"; transcript_biotype "protein_coding"
NC_000067.7	Novogene	exon	40039048	40039134	.	+	.	nearest_ref "XM_006496041.3"; exon_number "14"; gene_id "26921"; transcript_name "TCONS_00000109"; gene_biotype "protein_coding"; class_code "j"; transcript_id "TCONS_00000109"; gene_name "Map4k4"; transcript_biotype "protein_coding"
NC_000067.7	Novogene	exon	40039691	40039909	.	+	.	nearest_ref "XM_006496041.3"; exon_number "15"; gene_id "26921"; transcript_name "TCONS_00000109"; gene_biotype "protein_coding"; class_code "j"; transcript_id "TCONS_00000109"; gene_name "Map4k4"; transcript_biotype "protein_coding"
NC_000067.7	Novogene	exon	40042917	40043147	.	+	.	nearest_ref "XM_006496041.3"; exon_number "16"; gene_id "26921"; transcript_name "TCONS_00000109"; gene_biotype "protein_coding"; class_code "j"; transcript_id "TCONS_00000109"; gene_name "Map4k4"; transcript_biotype "protein_coding"
NC_000067.7	Novogene	exon	40043967	40044073	.	+	.	nearest_ref "XM_006496041.3"; exon_number "17"; gene_id "26921"; transcript_name "TCONS_00000109"; gene_biotype "protein_coding"; class_code "j"; transcript_id "TCONS_00000109"; gene_name "Map4k4"; transcript_biotype "protein_coding"
NC_000067.7	Novogene	exon	40045831	40045982	.	+	.	nearest_ref "XM_006496041.3"; exon_number "18"; gene_id "26921"; transcript_name "TCONS_00000109"; gene_biotype "protein_coding"; class_code "j"; transcript_id "TCONS_00000109"; gene_name "Map4k4"; transcript_biotype "protein_coding"
NC_000067.7	Novogene	exon	40046593	40046690	.	+	.	nearest_ref "XM_006496041.3"; exon_number "19"; gene_id "26921"; transcript_name "TCONS_00000109"; gene_biotype "protein_coding"; class_code "j"; transcript_id "TCONS_00000109"; gene_name "Map4k4"; transcript_biotype "protein_coding"
NC_000067.7	Novogene	exon	40048848	40049023	.	+	.	nearest_ref "XM_006496041.3"; exon_number "20"; gene_id "26921"; transcript_name "TCONS_00000109"; gene_biotype "protein_coding"; class_code "j"; transcript_id "TCONS_00000109"; gene_name "Map4k4"; transcript_biotype "protein_coding"
NC_000067.7	Novogene	exon	40049717	40049837	.	+	.	nearest_ref "XM_006496041.3"; exon_number "21"; gene_id "26921"; transcript_name "TCONS_00000109"; gene_biotype "protein_coding"; class_code "j"; transcript_id "TCONS_00000109"; gene_name "Map4k4"; transcript_biotype "protein_coding"
NC_000067.7	Novogene	exon	40053266	40053383	.	+	.	nearest_ref "XM_006496041.3"; exon_number "22"; gene_id "26921"; transcript_name "TCONS_00000109"; gene_biotype "protein_coding"; class_code "j"; transcript_id "TCONS_00000109"; gene_name "Map4k4"; transcript_biotype "protein_coding"
NC_000067.7	Novogene	exon	40053687	40053857	.	+	.	nearest_ref "XM_006496041.3"; exon_number "23"; gene_id "26921"; transcript_name "TCONS_00000109"; gene_biotype "protein_coding"; class_code "j"; transcript_id "TCONS_00000109"; gene_name "Map4k4"; transcript_biotype "protein_coding"
NC_000067.7	Novogene	exon	40056270	40056413	.	+	.	nearest_ref "XM_006496041.3"; exon_number "24"; gene_id "26921"; transcript_name "TCONS_00000109"; gene_biotype "protein_coding"; class_code "j"; transcript_id "TCONS_00000109"; gene_name "Map4k4"; transcript_biotype "protein_coding"
NC_000067.7	Novogene	exon	40058704	40058838	.	+	.	nearest_ref "XM_006496041.3"; exon_number "25"; gene_id "26921"; transcript_name "TCONS_00000109"; gene_biotype "protein_coding"; class_code "j"; transcript_id "TCONS_00000109"; gene_name "Map4k4"; transcript_biotype "protein_coding"
NC_000067.7	Novogene	exon	40060244	40060344	.	+	.	nearest_ref "XM_006496041.3"; exon_number "26"; gene_id "26921"; transcript_name "TCONS_00000109"; gene_biotype "protein_coding"; class_code "j"; transcript_id "TCONS_00000109"; gene_name "Map4k4"; transcript_biotype "protein_coding"
NC_000067.7	Novogene	exon	40061865	40062014	.	+	.	nearest_ref "XM_006496041.3"; exon_number "27"; gene_id "26921"; transcript_name "TCONS_00000109"; gene_biotype "protein_coding"; class_code "j"; transcript_id "TCONS_00000109"; gene_name "Map4k4"; transcript_biotype "protein_coding"
NC_000067.7	Novogene	exon	40062520	40062679	.	+	.	nearest_ref "XM_006496041.3"; exon_number "28"; gene_id "26921"; transcript_name "TCONS_00000109"; gene_biotype "protein_coding"; class_code "j"; transcript_id "TCONS_00000109"; gene_name "Map4k4"; transcript_biotype "protein_coding"
NC_000067.7	Novogene	exon	40063470	40063609	.	+	.	nearest_ref "XM_006496041.3"; exon_number "29"; gene_id "26921"; transcript_name "TCONS_00000109"; gene_biotype "protein_coding"; class_code "j"; transcript_id "TCONS_00000109"; gene_name "Map4k4"; transcript_biotype "protein_coding"
NC_000067.7	Novogene	exon	40063789	40065466	.	+	.	nearest_ref "XM_006496041.3"; exon_number "30"; gene_id "26921"; transcript_name "TCONS_00000109"; gene_biotype "protein_coding"; class_code "j"; transcript_id "TCONS_00000109"; gene_name "Map4k4"; transcript_biotype "protein_coding"
NC_000067.7	Novogene	exon	43973154	43973413	.	+	.	nearest_ref "XR_373249.4"; exon_number "1"; gene_id "22019"; transcript_name "TCONS_00000124"; gene_biotype "protein_coding"; class_code "j"; transcript_id "TCONS_00000124"; gene_name "Tpp2"; transcript_biotype "protein_coding"
NC_000067.7	Novogene	exon	43979270	43979398	.	+	.	nearest_ref "XR_373249.4"; exon_number "2"; gene_id "22019"; transcript_name "TCONS_00000124"; gene_biotype "protein_coding"; class_code "j"; transcript_id "TCONS_00000124"; gene_name "Tpp2"; transcript_biotype "protein_coding"
NC_000067.7	Novogene	exon	43988472	43988567	.	+	.	nearest_ref "XR_373249.4"; exon_number "3"; gene_id "22019"; transcript_name "TCONS_00000124"; gene_biotype "protein_coding"; class_code "j"; transcript_id "TCONS_00000124"; gene_name "Tpp2"; transcript_biotype "protein_coding"
NC_000067.7	Novogene	exon	43990267	43990371	.	+	.	nearest_ref "XR_373249.4"; exon_number "4"; gene_id "22019"; transcript_name "TCONS_00000124"; gene_biotype "protein_coding"; class_code "j"; transcript_id "TCONS_00000124"; gene_name "Tpp2"; transcript_biotype "protein_coding"
NC_000067.7	Novogene	exon	43992417	43992541	.	+	.	nearest_ref "XR_373249.4"; exon_number "5"; gene_id "22019"; transcript_name "TCONS_00000124"; gene_biotype "protein_coding"; class_code "j"; transcript_id "TCONS_00000124"; gene_name "Tpp2"; transcript_biotype "protein_coding"
NC_000067.7	Novogene	exon	43993737	43993900	.	+	.	nearest_ref "XR_373249.4"; exon_number "6"; gene_id "22019"; transcript_name "TCONS_00000124"; gene_biotype "protein_coding"; class_code "j"; transcript_id "TCONS_00000124"; gene_name "Tpp2"; transcript_biotype "protein_coding"
NC_000067.7	Novogene	exon	43995631	43995785	.	+	.	nearest_ref "XR_373249.4"; exon_number "7"; gene_id "22019"; transcript_name "TCONS_00000124"; gene_biotype "protein_coding"; class_code "j"; transcript_id "TCONS_00000124"; gene_name "Tpp2"; transcript_biotype "protein_coding"
NC_000067.7	Novogene	exon	43996596	43996672	.	+	.	nearest_ref "XR_373249.4"; exon_number "8"; gene_id "22019"; transcript_name "TCONS_00000124"; gene_biotype "protein_coding"; class_code "j"; transcript_id "TCONS_00000124"; gene_name "Tpp2"; transcript_biotype "protein_coding"
NC_000067.7	Novogene	exon	43999244	43999371	.	+	.	nearest_ref "XR_373249.4"; exon_number "9"; gene_id "22019"; transcript_name "TCONS_00000124"; gene_biotype "protein_coding"; class_code "j"; transcript_id "TCONS_00000124"; gene_name "Tpp2"; transcript_biotype "protein_coding"
NC_000067.7	Novogene	exon	44000028	44000127	.	+	.	nearest_ref "XR_373249.4"; exon_number "10"; gene_id "22019"; transcript_name "TCONS_00000124"; gene_biotype "protein_coding"; class_code "j"; transcript_id "TCONS_00000124"; gene_name "Tpp2"; transcript_biotype "protein_coding"
NC_000067.7	Novogene	exon	44008042	44008190	.	+	.	nearest_ref "XR_373249.4"; exon_number "11"; gene_id "22019"; transcript_name "TCONS_00000124"; gene_biotype "protein_coding"; class_code "j"; transcript_id "TCONS_00000124"; gene_name "Tpp2"; transcript_biotype "protein_coding"
NC_000067.7	Novogene	exon	44009561	44009676	.	+	.	nearest_ref "XR_373249.4"; exon_number "12"; gene_id "22019"; transcript_name "TCONS_00000124"; gene_biotype "protein_coding"; class_code "j"; transcript_id "TCONS_00000124"; gene_name "Tpp2"; transcript_biotype "protein_coding"
NC_000067.7	Novogene	exon	44010724	44010892	.	+	.	nearest_ref "XR_373249.4"; exon_number "13"; gene_id "22019"; transcript_name "TCONS_00000124"; gene_biotype "protein_coding"; class_code "j"; transcript_id "TCONS_00000124"; gene_name "Tpp2"; transcript_biotype "protein_coding"
NC_000067.7	Novogene	exon	44011690	44011847	.	+	.	nearest_ref "XR_373249.4"; exon_number "14"; gene_id "22019"; transcript_name "TCONS_00000124"; gene_biotype "protein_coding"; class_code "j"; transcript_id "TCONS_00000124"; gene_name "Tpp2"; transcript_biotype "protein_coding"
NC_000067.7	Novogene	exon	44012604	44012680	.	+	.	nearest_ref "XR_373249.4"; exon_number "15"; gene_id "22019"; transcript_name "TCONS_00000124"; gene_biotype "protein_coding"; class_code "j"; transcript_id "TCONS_00000124"; gene_name "Tpp2"; transcript_biotype "protein_coding"
NC_000067.7	Novogene	exon	44014576	44014682	.	+	.	nearest_ref "XR_373249.4"; exon_number "16"; gene_id "22019"; transcript_name "TCONS_00000124"; gene_biotype "protein_coding"; class_code "j"; transcript_id "TCONS_00000124"; gene_name "Tpp2"; transcript_biotype "protein_coding"
NC_000067.7	Novogene	exon	44016367	44016521	.	+	.	nearest_ref "XR_373249.4"; exon_number "17"; gene_id "22019"; transcript_name "TCONS_00000124"; gene_biotype "protein_coding"; class_code "j"; transcript_id "TCONS_00000124"; gene_name "Tpp2"; transcript_biotype "protein_coding"
NC_000067.7	Novogene	exon	44017573	44017689	.	+	.	nearest_ref "XR_373249.4"; exon_number "18"; gene_id "22019"; transcript_name "TCONS_00000124"; gene_biotype "protein_coding"; class_code "j"; transcript_id "TCONS_00000124"; gene_name "Tpp2"; transcript_biotype "protein_coding"
NC_000067.7	Novogene	exon	44017895	44017995	.	+	.	nearest_ref "XR_373249.4"; exon_number "19"; gene_id "22019"; transcript_name "TCONS_00000124"; gene_biotype "protein_coding"; class_code "j"; transcript_id "TCONS_00000124"; gene_name "Tpp2"; transcript_biotype "protein_coding"
NC_000067.7	Novogene	exon	44019468	44019564	.	+	.	nearest_ref "XR_373249.4"; exon_number "20"; gene_id "22019"; transcript_name "TCONS_00000124"; gene_biotype "protein_coding"; class_code "j"; transcript_id "TCONS_00000124"; gene_name "Tpp2"; transcript_biotype "protein_coding"
NC_000067.7	Novogene	exon	44020890	44021027	.	+	.	nearest_ref "XR_373249.4"; exon_number "21"; gene_id "22019"; transcript_name "TCONS_00000124"; gene_biotype "protein_coding"; class_code "j"; transcript_id "TCONS_00000124"; gene_name "Tpp2"; transcript_biotype "protein_coding"
NC_000067.7	Novogene	exon	44022232	44022476	.	+	.	nearest_ref "XR_373249.4"; exon_number "22"; gene_id "22019"; transcript_name "TCONS_00000124"; gene_biotype "protein_coding"; class_code "j"; transcript_id "TCONS_00000124"; gene_name "Tpp2"; transcript_biotype "protein_coding"
NC_000067.7	Novogene	exon	44022674	44024614	.	+	.	nearest_ref "XR_373249.4"; exon_number "23"; gene_id "22019"; transcript_name "TCONS_00000124"; gene_biotype "protein_coding"; class_code "j"; transcript_id "TCONS_00000124"; gene_name "Tpp2"; transcript_biotype "protein_coding"
NC_000067.7	Novogene	exon	44029671	44029822	.	+	.	nearest_ref "XR_373249.4"; exon_number "24"; gene_id "22019"; transcript_name "TCONS_00000124"; gene_biotype "protein_coding"; class_code "j"; transcript_id "TCONS_00000124"; gene_name "Tpp2"; transcript_biotype "protein_coding"
NC_000067.7	Novogene	exon	44030423	44030519	.	+	.	nearest_ref "XR_373249.4"; exon_number "25"; gene_id "22019"; transcript_name "TCONS_00000124"; gene_biotype "protein_coding"; class_code "j"; transcript_id "TCONS_00000124"; gene_name "Tpp2"; transcript_biotype "protein_coding"
NC_000067.7	Novogene	exon	44031424	44031554	.	+	.	nearest_ref "XR_373249.4"; exon_number "26"; gene_id "22019"; transcript_name "TCONS_00000124"; gene_biotype "protein_coding"; class_code "j"; transcript_id "TCONS_00000124"; gene_name "Tpp2"; transcript_biotype "protein_coding"
NC_000067.7	Novogene	exon	44038788	44038995	.	+	.	nearest_ref "XR_373249.4"; exon_number "27"; gene_id "22019"; transcript_name "TCONS_00000124"; gene_biotype "protein_coding"; class_code "j"; transcript_id "TCONS_00000124"; gene_name "Tpp2"; transcript_biotype "protein_coding"
NC_000067.7	Novogene	exon	44040479	44040598	.	+	.	nearest_ref "XR_373249.4"; exon_number "28"; gene_id "22019"; transcript_name "TCONS_00000124"; gene_biotype "protein_coding"; class_code "j"; transcript_id "TCONS_00000124"; gene_name "Tpp2"; transcript_biotype "protein_coding"
NC_000067.7	Novogene	exon	44041264	44042160	.	+	.	nearest_ref "XR_373249.4"; exon_number "29"; gene_id "22019"; transcript_name "TCONS_00000124"; gene_biotype "protein_coding"; class_code "j"; transcript_id "TCONS_00000124"; gene_name "Tpp2"; transcript_biotype "protein_coding"
NC_000067.7	Novogene	exon	52155809	52155883	.	+	.	nearest_ref "NM_009283.4"; exon_number "1"; gene_id "20846"; transcript_name "TCONS_00000136"; gene_biotype "protein_coding"; class_code "j"; transcript_id "TCONS_00000136"; gene_name "Stat1"; transcript_biotype "protein_coding"
NC_000067.7	Novogene	exon	52158139	52158273	.	+	.	nearest_ref "NM_009283.4"; exon_number "2"; gene_id "20846"; transcript_name "TCONS_00000136"; gene_biotype "protein_coding"; class_code "j"; transcript_id "TCONS_00000136"; gene_name "Stat1"; transcript_biotype "protein_coding"
NC_000067.7	Novogene	exon	52158651	52158782	.	+	.	nearest_ref "NM_009283.4"; exon_number "3"; gene_id "20846"; transcript_name "TCONS_00000136"; gene_biotype "protein_coding"; class_code "j"; transcript_id "TCONS_00000136"; gene_name "Stat1"; transcript_biotype "protein_coding"
NC_000067.7	Novogene	exon	52159071	52159231	.	+	.	nearest_ref "NM_009283.4"; exon_number "4"; gene_id "20846"; transcript_name "TCONS_00000136"; gene_biotype "protein_coding"; class_code "j"; transcript_id "TCONS_00000136"; gene_name "Stat1"; transcript_biotype "protein_coding"
NC_000067.7	Novogene	exon	52161750	52161880	.	+	.	nearest_ref "NM_009283.4"; exon_number "5"; gene_id "20846"; transcript_name "TCONS_00000136"; gene_biotype "protein_coding"; class_code "j"; transcript_id "TCONS_00000136"; gene_name "Stat1"; transcript_biotype "protein_coding"
NC_000067.7	Novogene	exon	52162273	52162417	.	+	.	nearest_ref "NM_009283.4"; exon_number "6"; gene_id "20846"; transcript_name "TCONS_00000136"; gene_biotype "protein_coding"; class_code "j"; transcript_id "TCONS_00000136"; gene_name "Stat1"; transcript_biotype "protein_coding"
NC_000067.7	Novogene	exon	52165679	52165777	.	+	.	nearest_ref "NM_009283.4"; exon_number "7"; gene_id "20846"; transcript_name "TCONS_00000136"; gene_biotype "protein_coding"; class_code "j"; transcript_id "TCONS_00000136"; gene_name "Stat1"; transcript_biotype "protein_coding"
NC_000067.7	Novogene	exon	52171703	52171792	.	+	.	nearest_ref "NM_009283.4"; exon_number "8"; gene_id "20846"; transcript_name "TCONS_00000136"; gene_biotype "protein_coding"; class_code "j"; transcript_id "TCONS_00000136"; gene_name "Stat1"; transcript_biotype "protein_coding"
NC_000067.7	Novogene	exon	52174762	52174840	.	+	.	nearest_ref "NM_009283.4"; exon_number "9"; gene_id "20846"; transcript_name "TCONS_00000136"; gene_biotype "protein_coding"; class_code "j"; transcript_id "TCONS_00000136"; gene_name "Stat1"; transcript_biotype "protein_coding"
NC_000067.7	Novogene	exon	52176038	52176129	.	+	.	nearest_ref "NM_009283.4"; exon_number "10"; gene_id "20846"; transcript_name "TCONS_00000136"; gene_biotype "protein_coding"; class_code "j"; transcript_id "TCONS_00000136"; gene_name "Stat1"; transcript_biotype "protein_coding"
NC_000067.7	Novogene	exon	52176438	52176589	.	+	.	nearest_ref "NM_009283.4"; exon_number "11"; gene_id "20846"; transcript_name "TCONS_00000136"; gene_biotype "protein_coding"; class_code "j"; transcript_id "TCONS_00000136"; gene_name "Stat1"; transcript_biotype "protein_coding"
NC_000067.7	Novogene	exon	52178353	52178511	.	+	.	nearest_ref "NM_009283.4"; exon_number "12"; gene_id "20846"; transcript_name "TCONS_00000136"; gene_biotype "protein_coding"; class_code "j"; transcript_id "TCONS_00000136"; gene_name "Stat1"; transcript_biotype "protein_coding"
NC_000067.7	Novogene	exon	52179736	52179828	.	+	.	nearest_ref "NM_009283.4"; exon_number "13"; gene_id "20846"; transcript_name "TCONS_00000136"; gene_biotype "protein_coding"; class_code "j"; transcript_id "TCONS_00000136"; gene_name "Stat1"; transcript_biotype "protein_coding"
NC_000067.7	Novogene	exon	52182060	52182119	.	+	.	nearest_ref "NM_009283.4"; exon_number "14"; gene_id "20846"; transcript_name "TCONS_00000136"; gene_biotype "protein_coding"; class_code "j"; transcript_id "TCONS_00000136"; gene_name "Stat1"; transcript_biotype "protein_coding"
NC_000067.7	Novogene	exon	52183245	52183274	.	+	.	nearest_ref "NM_009283.4"; exon_number "15"; gene_id "20846"; transcript_name "TCONS_00000136"; gene_biotype "protein_coding"; class_code "j"; transcript_id "TCONS_00000136"; gene_name "Stat1"; transcript_biotype "protein_coding"
NC_000067.7	Novogene	exon	52183363	52183456	.	+	.	nearest_ref "NM_009283.4"; exon_number "16"; gene_id "20846"; transcript_name "TCONS_00000136"; gene_biotype "protein_coding"; class_code "j"; transcript_id "TCONS_00000136"; gene_name "Stat1"; transcript_biotype "protein_coding"
NC_000067.7	Novogene	exon	52184309	52184350	.	+	.	nearest_ref "NM_009283.4"; exon_number "17"; gene_id "20846"; transcript_name "TCONS_00000136"; gene_biotype "protein_coding"; class_code "j"; transcript_id "TCONS_00000136"; gene_name "Stat1"; transcript_biotype "protein_coding"
NC_000067.7	Novogene	exon	52186453	52186536	.	+	.	nearest_ref "NM_009283.4"; exon_number "18"; gene_id "20846"; transcript_name "TCONS_00000136"; gene_biotype "protein_coding"; class_code "j"; transcript_id "TCONS_00000136"; gene_name "Stat1"; transcript_biotype "protein_coding"
NC_000067.7	Novogene	exon	52187060	52187158	.	+	.	nearest_ref "NM_009283.4"; exon_number "19"; gene_id "20846"; transcript_name "TCONS_00000136"; gene_biotype "protein_coding"; class_code "j"; transcript_id "TCONS_00000136"; gene_name "Stat1"; transcript_biotype "protein_coding"
NC_000067.7	Novogene	exon	52188062	52188197	.	+	.	nearest_ref "NM_009283.4"; exon_number "20"; gene_id "20846"; transcript_name "TCONS_00000136"; gene_biotype "protein_coding"; class_code "j"; transcript_id "TCONS_00000136"; gene_name "Stat1"; transcript_biotype "protein_coding"
NC_000067.7	Novogene	exon	52189778	52189827	.	+	.	nearest_ref "NM_009283.4"; exon_number "21"; gene_id "20846"; transcript_name "TCONS_00000136"; gene_biotype "protein_coding"; class_code "j"; transcript_id "TCONS_00000136"; gene_name "Stat1"; transcript_biotype "protein_coding"
NC_000067.7	Novogene	exon	52190397	52190491	.	+	.	nearest_ref "NM_009283.4"; exon_number "22"; gene_id "20846"; transcript_name "TCONS_00000136"; gene_biotype "protein_coding"; class_code "j"; transcript_id "TCONS_00000136"; gene_name "Stat1"; transcript_biotype "protein_coding"
NC_000067.7	Novogene	exon	52191392	52191537	.	+	.	nearest_ref "NM_009283.4"; exon_number "23"; gene_id "20846"; transcript_name "TCONS_00000136"; gene_biotype "protein_coding"; class_code "j"; transcript_id "TCONS_00000136"; gene_name "Stat1"; transcript_biotype "protein_coding"
NC_000067.7	Novogene	exon	52193003	52193188	.	+	.	nearest_ref "NM_009283.4"; exon_number "24"; gene_id "20846"; transcript_name "TCONS_00000136"; gene_biotype "protein_coding"; class_code "j"; transcript_id "TCONS_00000136"; gene_name "Stat1"; transcript_biotype "protein_coding"
NC_000067.7	Novogene	exon	52194145	52194220	.	+	.	nearest_ref "NM_009283.4"; exon_number "25"; gene_id "20846"; transcript_name "TCONS_00000136"; gene_biotype "protein_coding"; class_code "j"; transcript_id "TCONS_00000136"; gene_name "Stat1"; transcript_biotype "protein_coding"
NC_000067.7	Novogene	exon	52195142	52195241	.	+	.	nearest_ref "NM_009283.4"; exon_number "26"; gene_id "20846"; transcript_name "TCONS_00000136"; gene_biotype "protein_coding"; class_code "j"; transcript_id "TCONS_00000136"; gene_name "Stat1"; transcript_biotype "protein_coding"
NC_000067.7	Novogene	exon	52198442	52201024	.	+	.	nearest_ref "NM_009283.4"; exon_number "27"; gene_id "20846"; transcript_name "TCONS_00000136"; gene_biotype "protein_coding"; class_code "j"; transcript_id "TCONS_00000136"; gene_name "Stat1"; transcript_biotype "protein_coding"
NC_000067.7	Novogene	exon	58069128	58069217	.	+	.	nearest_ref "NM_009676.2"; exon_number "1"; gene_id "11761"; transcript_name "TCONS_00000162"; gene_biotype "protein_coding"; class_code "j"; transcript_id "TCONS_00000162"; gene_name "Aox1"; transcript_biotype "protein_coding"
NC_000067.7	Novogene	exon	58080595	58080652	.	+	.	nearest_ref "NM_009676.2"; exon_number "2"; gene_id "11761"; transcript_name "TCONS_00000162"; gene_biotype "protein_coding"; class_code "j"; transcript_id "TCONS_00000162"; gene_name "Aox1"; transcript_biotype "protein_coding"
NC_000067.7	Novogene	exon	58082701	58082797	.	+	.	nearest_ref "NM_009676.2"; exon_number "3"; gene_id "11761"; transcript_name "TCONS_00000162"; gene_biotype "protein_coding"; class_code "j"; transcript_id "TCONS_00000162"; gene_name "Aox1"; transcript_biotype "protein_coding"
NC_000067.7	Novogene	exon	58086294	58086402	.	+	.	nearest_ref "NM_009676.2"; exon_number "4"; gene_id "11761"; transcript_name "TCONS_00000162"; gene_biotype "protein_coding"; class_code "j"; transcript_id "TCONS_00000162"; gene_name "Aox1"; transcript_biotype "protein_coding"
NC_000067.7	Novogene	exon	58088522	58088648	.	+	.	nearest_ref "NM_009676.2"; exon_number "5"; gene_id "11761"; transcript_name "TCONS_00000162"; gene_biotype "protein_coding"; class_code "j"; transcript_id "TCONS_00000162"; gene_name "Aox1"; transcript_biotype "protein_coding"
NC_000067.7	Novogene	exon	58092823	58092884	.	+	.	nearest_ref "NM_009676.2"; exon_number "6"; gene_id "11761"; transcript_name "TCONS_00000162"; gene_biotype "protein_coding"; class_code "j"; transcript_id "TCONS_00000162"; gene_name "Aox1"; transcript_biotype "protein_coding"
NC_000067.7	Novogene	exon	58093807	58093896	.	+	.	nearest_ref "NM_009676.2"; exon_number "7"; gene_id "11761"; transcript_name "TCONS_00000162"; gene_biotype "protein_coding"; class_code "j"; transcript_id "TCONS_00000162"; gene_name "Aox1"; transcript_biotype "protein_coding"
NC_000067.7	Novogene	exon	58095373	58095453	.	+	.	nearest_ref "NM_009676.2"; exon_number "8"; gene_id "11761"; transcript_name "TCONS_00000162"; gene_biotype "protein_coding"; class_code "j"; transcript_id "TCONS_00000162"; gene_name "Aox1"; transcript_biotype "protein_coding"
NC_000067.7	Novogene	exon	58096573	58096717	.	+	.	nearest_ref "NM_009676.2"; exon_number "9"; gene_id "11761"; transcript_name "TCONS_00000162"; gene_biotype "protein_coding"; class_code "j"; transcript_id "TCONS_00000162"; gene_name "Aox1"; transcript_biotype "protein_coding"
NC_000067.7	Novogene	exon	58097291	58097383	.	+	.	nearest_ref "NM_009676.2"; exon_number "10"; gene_id "11761"; transcript_name "TCONS_00000162"; gene_biotype "protein_coding"; class_code "j"; transcript_id "TCONS_00000162"; gene_name "Aox1"; transcript_biotype "protein_coding"
NC_000067.7	Novogene	exon	58098194	58098349	.	+	.	nearest_ref "NM_009676.2"; exon_number "11"; gene_id "11761"; transcript_name "TCONS_00000162"; gene_biotype "protein_coding"; class_code "j"; transcript_id "TCONS_00000162"; gene_name "Aox1"; transcript_biotype "protein_coding"
NC_000067.7	Novogene	exon	58098538	58098631	.	+	.	nearest_ref "NM_009676.2"; exon_number "12"; gene_id "11761"; transcript_name "TCONS_00000162"; gene_biotype "protein_coding"; class_code "j"; transcript_id "TCONS_00000162"; gene_name "Aox1"; transcript_biotype "protein_coding"
NC_000067.7	Novogene	exon	58100355	58100464	.	+	.	nearest_ref "NM_009676.2"; exon_number "13"; gene_id "11761"; transcript_name "TCONS_00000162"; gene_biotype "protein_coding"; class_code "j"; transcript_id "TCONS_00000162"; gene_name "Aox1"; transcript_biotype "protein_coding"
NC_000067.7	Novogene	exon	58101291	58101475	.	+	.	nearest_ref "NM_009676.2"; exon_number "14"; gene_id "11761"; transcript_name "TCONS_00000162"; gene_biotype "protein_coding"; class_code "j"; transcript_id "TCONS_00000162"; gene_name "Aox1"; transcript_biotype "protein_coding"
NC_000067.7	Novogene	exon	58102531	58102693	.	+	.	nearest_ref "NM_009676.2"; exon_number "15"; gene_id "11761"; transcript_name "TCONS_00000162"; gene_biotype "protein_coding"; class_code "j"; transcript_id "TCONS_00000162"; gene_name "Aox1"; transcript_biotype "protein_coding"
NC_000067.7	Novogene	exon	58104433	58104525	.	+	.	nearest_ref "NM_009676.2"; exon_number "16"; gene_id "11761"; transcript_name "TCONS_00000162"; gene_biotype "protein_coding"; class_code "j"; transcript_id "TCONS_00000162"; gene_name "Aox1"; transcript_biotype "protein_coding"
NC_000067.7	Novogene	exon	58107429	58107598	.	+	.	nearest_ref "NM_009676.2"; exon_number "17"; gene_id "11761"; transcript_name "TCONS_00000162"; gene_biotype "protein_coding"; class_code "j"; transcript_id "TCONS_00000162"; gene_name "Aox1"; transcript_biotype "protein_coding"
NC_000067.7	Novogene	exon	58107891	58108005	.	+	.	nearest_ref "NM_009676.2"; exon_number "18"; gene_id "11761"; transcript_name "TCONS_00000162"; gene_biotype "protein_coding"; class_code "j"; transcript_id "TCONS_00000162"; gene_name "Aox1"; transcript_biotype "protein_coding"
NC_000067.7	Novogene	exon	58109200	58120748	.	+	.	nearest_ref "NM_009676.2"; exon_number "19"; gene_id "11761"; transcript_name "TCONS_00000162"; gene_biotype "protein_coding"; class_code "j"; transcript_id "TCONS_00000162"; gene_name "Aox1"; transcript_biotype "protein_coding"
NC_000067.7	Novogene	exon	58121171	58121362	.	+	.	nearest_ref "NM_009676.2"; exon_number "20"; gene_id "11761"; transcript_name "TCONS_00000162"; gene_biotype "protein_coding"; class_code "j"; transcript_id "TCONS_00000162"; gene_name "Aox1"; transcript_biotype "protein_coding"
NC_000067.7	Novogene	exon	58124593	58124820	.	+	.	nearest_ref "NM_009676.2"; exon_number "21"; gene_id "11761"; transcript_name "TCONS_00000162"; gene_biotype "protein_coding"; class_code "j"; transcript_id "TCONS_00000162"; gene_name "Aox1"; transcript_biotype "protein_coding"
NC_000067.7	Novogene	exon	58131653	58131748	.	+	.	nearest_ref "NM_009676.2"; exon_number "22"; gene_id "11761"; transcript_name "TCONS_00000162"; gene_biotype "protein_coding"; class_code "j"; transcript_id "TCONS_00000162"; gene_name "Aox1"; transcript_biotype "protein_coding"
NC_000067.7	Novogene	exon	58133580	58133708	.	+	.	nearest_ref "NM_009676.2"; exon_number "23"; gene_id "11761"; transcript_name "TCONS_00000162"; gene_biotype "protein_coding"; class_code "j"; transcript_id "TCONS_00000162"; gene_name "Aox1"; transcript_biotype "protein_coding"
NC_000067.7	Novogene	exon	58134314	58134388	.	+	.	nearest_ref "NM_009676.2"; exon_number "24"; gene_id "11761"; transcript_name "TCONS_00000162"; gene_biotype "protein_coding"; class_code "j"; transcript_id "TCONS_00000162"; gene_name "Aox1"; transcript_biotype "protein_coding"
NC_000067.7	Novogene	exon	58136119	58136171	.	+	.	nearest_ref "NM_009676.2"; exon_number "25"; gene_id "11761"; transcript_name "TCONS_00000162"; gene_biotype "protein_coding"; class_code "j"; transcript_id "TCONS_00000162"; gene_name "Aox1"; transcript_biotype "protein_coding"
NC_000067.7	Novogene	exon	58137025	58137139	.	+	.	nearest_ref "NM_009676.2"; exon_number "26"; gene_id "11761"; transcript_name "TCONS_00000162"; gene_biotype "protein_coding"; class_code "j"; transcript_id "TCONS_00000162"; gene_name "Aox1"; transcript_biotype "protein_coding"
NC_000067.7	Novogene	exon	58141744	58141809	.	+	.	nearest_ref "NM_009676.2"; exon_number "27"; gene_id "11761"; transcript_name "TCONS_00000162"; gene_biotype "protein_coding"; class_code "j"; transcript_id "TCONS_00000162"; gene_name "Aox1"; transcript_biotype "protein_coding"
NC_000067.7	Novogene	exon	58143478	58143666	.	+	.	nearest_ref "NM_009676.2"; exon_number "28"; gene_id "11761"; transcript_name "TCONS_00000162"; gene_biotype "protein_coding"; class_code "j"; transcript_id "TCONS_00000162"; gene_name "Aox1"; transcript_biotype "protein_coding"
NC_000067.7	Novogene	exon	58144124	58144291	.	+	.	nearest_ref "NM_009676.2"; exon_number "29"; gene_id "11761"; transcript_name "TCONS_00000162"; gene_biotype "protein_coding"; class_code "j"; transcript_id "TCONS_00000162"; gene_name "Aox1"; transcript_biotype "protein_coding"
NC_000067.7	Novogene	exon	58145187	58145569	.	+	.	nearest_ref "NM_009676.2"; exon_number "30"; gene_id "11761"; transcript_name "TCONS_00000162"; gene_biotype "protein_coding"; class_code "j"; transcript_id "TCONS_00000162"; gene_name "Aox1"; transcript_biotype "protein_coding"
NC_000067.7	Novogene	exon	58473495	58473608	.	+	.	nearest_ref "NM_022988.3"; exon_number "1"; gene_id "65102"; transcript_name "TCONS_00000165"; gene_biotype "protein_coding"; class_code "j"; transcript_id "TCONS_00000165"; gene_name "Nif3l1"; transcript_biotype "protein_coding"
NC_000067.7	Novogene	exon	58477503	58477570	.	+	.	nearest_ref "NM_022988.3"; exon_number "2"; gene_id "65102"; transcript_name "TCONS_00000165"; gene_biotype "protein_coding"; class_code "j"; transcript_id "TCONS_00000165"; gene_name "Nif3l1"; transcript_biotype "protein_coding"
NC_000067.7	Novogene	exon	58480002	58480095	.	+	.	nearest_ref "NM_022988.3"; exon_number "3"; gene_id "65102"; transcript_name "TCONS_00000165"; gene_biotype "protein_coding"; class_code "j"; transcript_id "TCONS_00000165"; gene_name "Nif3l1"; transcript_biotype "protein_coding"
NC_000067.7	Novogene	exon	58481684	58481758	.	+	.	nearest_ref "NM_022988.3"; exon_number "4"; gene_id "65102"; transcript_name "TCONS_00000165"; gene_biotype "protein_coding"; class_code "j"; transcript_id "TCONS_00000165"; gene_name "Nif3l1"; transcript_biotype "protein_coding"
NC_000067.7	Novogene	exon	58483748	58483798	.	+	.	nearest_ref "NM_022988.3"; exon_number "5"; gene_id "65102"; transcript_name "TCONS_00000165"; gene_biotype "protein_coding"; class_code "j"; transcript_id "TCONS_00000165"; gene_name "Nif3l1"; transcript_biotype "protein_coding"
NC_000067.7	Novogene	exon	58484491	58484793	.	+	.	nearest_ref "NM_022988.3"; exon_number "6"; gene_id "65102"; transcript_name "TCONS_00000165"; gene_biotype "protein_coding"; class_code "j"; transcript_id "TCONS_00000165"; gene_name "Nif3l1"; transcript_biotype "protein_coding"
NC_000067.7	Novogene	exon	58486793	58487248	.	+	.	nearest_ref "NM_022988.3"; exon_number "7"; gene_id "65102"; transcript_name "TCONS_00000165"; gene_biotype "protein_coding"; class_code "j"; transcript_id "TCONS_00000165"; gene_name "Nif3l1"; transcript_biotype "protein_coding"
NC_000067.7	Novogene	exon	58489546	58489708	.	+	.	nearest_ref "NM_022988.3"; exon_number "8"; gene_id "65102"; transcript_name "TCONS_00000165"; gene_biotype "protein_coding"; class_code "j"; transcript_id "TCONS_00000165"; gene_name "Nif3l1"; transcript_biotype "protein_coding"
NC_000067.7	Novogene	exon	58491248	58491374	.	+	.	nearest_ref "NM_022988.3"; exon_number "9"; gene_id "65102"; transcript_name "TCONS_00000165"; gene_biotype "protein_coding"; class_code "j"; transcript_id "TCONS_00000165"; gene_name "Nif3l1"; transcript_biotype "protein_coding"
NC_000067.7	Novogene	exon	58494756	58494894	.	+	.	nearest_ref "NM_022988.3"; exon_number "10"; gene_id "65102"; transcript_name "TCONS_00000165"; gene_biotype "protein_coding"; class_code "j"; transcript_id "TCONS_00000165"; gene_name "Nif3l1"; transcript_biotype "protein_coding"
NC_000067.7	Novogene	exon	58496939	58497022	.	+	.	nearest_ref "NM_022988.3"; exon_number "11"; gene_id "65102"; transcript_name "TCONS_00000165"; gene_biotype "protein_coding"; class_code "j"; transcript_id "TCONS_00000165"; gene_name "Nif3l1"; transcript_biotype "protein_coding"
NC_000067.7	Novogene	exon	58500300	58501435	.	+	.	nearest_ref "NM_022988.3"; exon_number "12"; gene_id "65102"; transcript_name "TCONS_00000165"; gene_biotype "protein_coding"; class_code "j"; transcript_id "TCONS_00000165"; gene_name "Nif3l1"; transcript_biotype "protein_coding"
NC_000067.7	Novogene	exon	60219760	60219844	.	+	.	nearest_ref "XM_006496030.5"; exon_number "1"; gene_id "269198"; transcript_name "TCONS_00000183"; gene_biotype "protein_coding"; class_code "j"; transcript_id "TCONS_00000183"; gene_name "Nbeal1"; transcript_biotype "protein_coding"
NC_000067.7	Novogene	exon	60220622	60220913	.	+	.	nearest_ref "XM_006496030.5"; exon_number "2"; gene_id "269198"; transcript_name "TCONS_00000183"; gene_biotype "protein_coding"; class_code "j"; transcript_id "TCONS_00000183"; gene_name "Nbeal1"; transcript_biotype "protein_coding"
NC_000067.7	Novogene	exon	60233663	60233754	.	+	.	nearest_ref "XM_006496030.5"; exon_number "3"; gene_id "269198"; transcript_name "TCONS_00000183"; gene_biotype "protein_coding"; class_code "j"; transcript_id "TCONS_00000183"; gene_name "Nbeal1"; transcript_biotype "protein_coding"
NC_000067.7	Novogene	exon	60234174	60234335	.	+	.	nearest_ref "XM_006496030.5"; exon_number "4"; gene_id "269198"; transcript_name "TCONS_00000183"; gene_biotype "protein_coding"; class_code "j"; transcript_id "TCONS_00000183"; gene_name "Nbeal1"; transcript_biotype "protein_coding"
NC_000067.7	Novogene	exon	60239264	60239345	.	+	.	nearest_ref "XM_006496030.5"; exon_number "5"; gene_id "269198"; transcript_name "TCONS_00000183"; gene_biotype "protein_coding"; class_code "j"; transcript_id "TCONS_00000183"; gene_name "Nbeal1"; transcript_biotype "protein_coding"
NC_000067.7	Novogene	exon	60240023	60240150	.	+	.	nearest_ref "XM_006496030.5"; exon_number "6"; gene_id "269198"; transcript_name "TCONS_00000183"; gene_biotype "protein_coding"; class_code "j"; transcript_id "TCONS_00000183"; gene_name "Nbeal1"; transcript_biotype "protein_coding"
NC_000067.7	Novogene	exon	60245493	60245575	.	+	.	nearest_ref "XM_006496030.5"; exon_number "7"; gene_id "269198"; transcript_name "TCONS_00000183"; gene_biotype "protein_coding"; class_code "j"; transcript_id "TCONS_00000183"; gene_name "Nbeal1"; transcript_biotype "protein_coding"
NC_000067.7	Novogene	exon	60256355	60256440	.	+	.	nearest_ref "XM_006496030.5"; exon_number "8"; gene_id "269198"; transcript_name "TCONS_00000183"; gene_biotype "protein_coding"; class_code "j"; transcript_id "TCONS_00000183"; gene_name "Nbeal1"; transcript_biotype "protein_coding"
NC_000067.7	Novogene	exon	60261226	60261532	.	+	.	nearest_ref "XM_006496030.5"; exon_number "9"; gene_id "269198"; transcript_name "TCONS_00000183"; gene_biotype "protein_coding"; class_code "j"; transcript_id "TCONS_00000183"; gene_name "Nbeal1"; transcript_biotype "protein_coding"
NC_000067.7	Novogene	exon	60263784	60263890	.	+	.	nearest_ref "XM_006496030.5"; exon_number "10"; gene_id "269198"; transcript_name "TCONS_00000183"; gene_biotype "protein_coding"; class_code "j"; transcript_id "TCONS_00000183"; gene_name "Nbeal1"; transcript_biotype "protein_coding"
NC_000067.7	Novogene	exon	60269761	60269844	.	+	.	nearest_ref "XM_006496030.5"; exon_number "11"; gene_id "269198"; transcript_name "TCONS_00000183"; gene_biotype "protein_coding"; class_code "j"; transcript_id "TCONS_00000183"; gene_name "Nbeal1"; transcript_biotype "protein_coding"
NC_000067.7	Novogene	exon	60273956	60274054	.	+	.	nearest_ref "XM_006496030.5"; exon_number "12"; gene_id "269198"; transcript_name "TCONS_00000183"; gene_biotype "protein_coding"; class_code "j"; transcript_id "TCONS_00000183"; gene_name "Nbeal1"; transcript_biotype "protein_coding"
NC_000067.7	Novogene	exon	60274140	60274720	.	+	.	nearest_ref "XM_006496030.5"; exon_number "13"; gene_id "269198"; transcript_name "TCONS_00000183"; gene_biotype "protein_coding"; class_code "j"; transcript_id "TCONS_00000183"; gene_name "Nbeal1"; transcript_biotype "protein_coding"
NC_000067.7	Novogene	exon	60275530	60275662	.	+	.	nearest_ref "XM_006496030.5"; exon_number "14"; gene_id "269198"; transcript_name "TCONS_00000183"; gene_biotype "protein_coding"; class_code "j"; transcript_id "TCONS_00000183"; gene_name "Nbeal1"; transcript_biotype "protein_coding"
NC_000067.7	Novogene	exon	60276256	60276375	.	+	.	nearest_ref "XM_006496030.5"; exon_number "15"; gene_id "269198"; transcript_name "TCONS_00000183"; gene_biotype "protein_coding"; class_code "j"; transcript_id "TCONS_00000183"; gene_name "Nbeal1"; transcript_biotype "protein_coding"
NC_000067.7	Novogene	exon	60277731	60278034	.	+	.	nearest_ref "XM_006496030.5"; exon_number "16"; gene_id "269198"; transcript_name "TCONS_00000183"; gene_biotype "protein_coding"; class_code "j"; transcript_id "TCONS_00000183"; gene_name "Nbeal1"; transcript_biotype "protein_coding"
NC_000067.7	Novogene	exon	60281698	60281783	.	+	.	nearest_ref "XM_006496030.5"; exon_number "17"; gene_id "269198"; transcript_name "TCONS_00000183"; gene_biotype "protein_coding"; class_code "j"; transcript_id "TCONS_00000183"; gene_name "Nbeal1"; transcript_biotype "protein_coding"
NC_000067.7	Novogene	exon	60283953	60284042	.	+	.	nearest_ref "XM_006496030.5"; exon_number "18"; gene_id "269198"; transcript_name "TCONS_00000183"; gene_biotype "protein_coding"; class_code "j"; transcript_id "TCONS_00000183"; gene_name "Nbeal1"; transcript_biotype "protein_coding"
NC_000067.7	Novogene	exon	60286775	60286943	.	+	.	nearest_ref "XM_006496030.5"; exon_number "19"; gene_id "269198"; transcript_name "TCONS_00000183"; gene_biotype "protein_coding"; class_code "j"; transcript_id "TCONS_00000183"; gene_name "Nbeal1"; transcript_biotype "protein_coding"
NC_000067.7	Novogene	exon	60287522	60287655	.	+	.	nearest_ref "XM_006496030.5"; exon_number "20"; gene_id "269198"; transcript_name "TCONS_00000183"; gene_biotype "protein_coding"; class_code "j"; transcript_id "TCONS_00000183"; gene_name "Nbeal1"; transcript_biotype "protein_coding"
NC_000067.7	Novogene	exon	60290194	60290353	.	+	.	nearest_ref "XM_006496030.5"; exon_number "21"; gene_id "269198"; transcript_name "TCONS_00000183"; gene_biotype "protein_coding"; class_code "j"; transcript_id "TCONS_00000183"; gene_name "Nbeal1"; transcript_biotype "protein_coding"
NC_000067.7	Novogene	exon	60290463	60290565	.	+	.	nearest_ref "XM_006496030.5"; exon_number "22"; gene_id "269198"; transcript_name "TCONS_00000183"; gene_biotype "protein_coding"; class_code "j"; transcript_id "TCONS_00000183"; gene_name "Nbeal1"; transcript_biotype "protein_coding"
NC_000067.7	Novogene	exon	60292511	60292667	.	+	.	nearest_ref "XM_006496030.5"; exon_number "23"; gene_id "269198"; transcript_name "TCONS_00000183"; gene_biotype "protein_coding"; class_code "j"; transcript_id "TCONS_00000183"; gene_name "Nbeal1"; transcript_biotype "protein_coding"
NC_000067.7	Novogene	exon	60294053	60294211	.	+	.	nearest_ref "XM_006496030.5"; exon_number "24"; gene_id "269198"; transcript_name "TCONS_00000183"; gene_biotype "protein_coding"; class_code "j"; transcript_id "TCONS_00000183"; gene_name "Nbeal1"; transcript_biotype "protein_coding"
NC_000067.7	Novogene	exon	60296589	60296748	.	+	.	nearest_ref "XM_006496030.5"; exon_number "25"; gene_id "269198"; transcript_name "TCONS_00000183"; gene_biotype "protein_coding"; class_code "j"; transcript_id "TCONS_00000183"; gene_name "Nbeal1"; transcript_biotype "protein_coding"
NC_000067.7	Novogene	exon	60297809	60297897	.	+	.	nearest_ref "XM_006496030.5"; exon_number "26"; gene_id "269198"; transcript_name "TCONS_00000183"; gene_biotype "protein_coding"; class_code "j"; transcript_id "TCONS_00000183"; gene_name "Nbeal1"; transcript_biotype "protein_coding"
NC_000067.7	Novogene	exon	60299392	60299952	.	+	.	nearest_ref "XM_006496030.5"; exon_number "27"; gene_id "269198"; transcript_name "TCONS_00000183"; gene_biotype "protein_coding"; class_code "j"; transcript_id "TCONS_00000183"; gene_name "Nbeal1"; transcript_biotype "protein_coding"
NC_000067.7	Novogene	exon	60300569	60300744	.	+	.	nearest_ref "XM_006496030.5"; exon_number "28"; gene_id "269198"; transcript_name "TCONS_00000183"; gene_biotype "protein_coding"; class_code "j"; transcript_id "TCONS_00000183"; gene_name "Nbeal1"; transcript_biotype "protein_coding"
NC_000067.7	Novogene	exon	60303438	60303591	.	+	.	nearest_ref "XM_006496030.5"; exon_number "29"; gene_id "269198"; transcript_name "TCONS_00000183"; gene_biotype "protein_coding"; class_code "j"; transcript_id "TCONS_00000183"; gene_name "Nbeal1"; transcript_biotype "protein_coding"
NC_000067.7	Novogene	exon	60304041	60304169	.	+	.	nearest_ref "XM_006496030.5"; exon_number "30"; gene_id "269198"; transcript_name "TCONS_00000183"; gene_biotype "protein_coding"; class_code "j"; transcript_id "TCONS_00000183"; gene_name "Nbeal1"; transcript_biotype "protein_coding"
NC_000067.7	Novogene	exon	60306918	60307223	.	+	.	nearest_ref "XM_006496030.5"; exon_number "31"; gene_id "269198"; transcript_name "TCONS_00000183"; gene_biotype "protein_coding"; class_code "j"; transcript_id "TCONS_00000183"; gene_name "Nbeal1"; transcript_biotype "protein_coding"
NC_000067.7	Novogene	exon	60307542	60307691	.	+	.	nearest_ref "XM_006496030.5"; exon_number "32"; gene_id "269198"; transcript_name "TCONS_00000183"; gene_biotype "protein_coding"; class_code "j"; transcript_id "TCONS_00000183"; gene_name "Nbeal1"; transcript_biotype "protein_coding"
NC_000067.7	Novogene	exon	60309431	60309588	.	+	.	nearest_ref "XM_006496030.5"; exon_number "33"; gene_id "269198"; transcript_name "TCONS_00000183"; gene_biotype "protein_coding"; class_code "j"; transcript_id "TCONS_00000183"; gene_name "Nbeal1"; transcript_biotype "protein_coding"
NC_000067.7	Novogene	exon	60311292	60311416	.	+	.	nearest_ref "XM_006496030.5"; exon_number "34"; gene_id "269198"; transcript_name "TCONS_00000183"; gene_biotype "protein_coding"; class_code "j"; transcript_id "TCONS_00000183"; gene_name "Nbeal1"; transcript_biotype "protein_coding"
NC_000067.7	Novogene	exon	60316284	60316410	.	+	.	nearest_ref "XM_006496030.5"; exon_number "35"; gene_id "269198"; transcript_name "TCONS_00000183"; gene_biotype "protein_coding"; class_code "j"; transcript_id "TCONS_00000183"; gene_name "Nbeal1"; transcript_biotype "protein_coding"
NC_000067.7	Novogene	exon	60317072	60317220	.	+	.	nearest_ref "XM_006496030.5"; exon_number "36"; gene_id "269198"; transcript_name "TCONS_00000183"; gene_biotype "protein_coding"; class_code "j"; transcript_id "TCONS_00000183"; gene_name "Nbeal1"; transcript_biotype "protein_coding"
NC_000067.7	Novogene	exon	60317826	60317959	.	+	.	nearest_ref "XM_006496030.5"; exon_number "37"; gene_id "269198"; transcript_name "TCONS_00000183"; gene_biotype "protein_coding"; class_code "j"; transcript_id "TCONS_00000183"; gene_name "Nbeal1"; transcript_biotype "protein_coding"
NC_000067.7	Novogene	exon	60318858	60318959	.	+	.	nearest_ref "XM_006496030.5"; exon_number "38"; gene_id "269198"; transcript_name "TCONS_00000183"; gene_biotype "protein_coding"; class_code "j"; transcript_id "TCONS_00000183"; gene_name "Nbeal1"; transcript_biotype "protein_coding"
NC_000067.7	Novogene	exon	60320406	60320501	.	+	.	nearest_ref "XM_006496030.5"; exon_number "39"; gene_id "269198"; transcript_name "TCONS_00000183"; gene_biotype "protein_coding"; class_code "j"; transcript_id "TCONS_00000183"; gene_name "Nbeal1"; transcript_biotype "protein_coding"
NC_000067.7	Novogene	exon	60320984	60321108	.	+	.	nearest_ref "XM_006496030.5"; exon_number "40"; gene_id "269198"; transcript_name "TCONS_00000183"; gene_biotype "protein_coding"; class_code "j"; transcript_id "TCONS_00000183"; gene_name "Nbeal1"; transcript_biotype "protein_coding"
NC_000067.7	Novogene	exon	60323142	60323282	.	+	.	nearest_ref "XM_006496030.5"; exon_number "41"; gene_id "269198"; transcript_name "TCONS_00000183"; gene_biotype "protein_coding"; class_code "j"; transcript_id "TCONS_00000183"; gene_name "Nbeal1"; transcript_biotype "protein_coding"
NC_000067.7	Novogene	exon	60326470	60326600	.	+	.	nearest_ref "XM_006496030.5"; exon_number "42"; gene_id "269198"; transcript_name "TCONS_00000183"; gene_biotype "protein_coding"; class_code "j"; transcript_id "TCONS_00000183"; gene_name "Nbeal1"; transcript_biotype "protein_coding"
NC_000067.7	Novogene	exon	60329074	60329183	.	+	.	nearest_ref "XM_006496030.5"; exon_number "43"; gene_id "269198"; transcript_name "TCONS_00000183"; gene_biotype "protein_coding"; class_code "j"; transcript_id "TCONS_00000183"; gene_name "Nbeal1"; transcript_biotype "protein_coding"
NC_000067.7	Novogene	exon	60330993	60331110	.	+	.	nearest_ref "XM_006496030.5"; exon_number "44"; gene_id "269198"; transcript_name "TCONS_00000183"; gene_biotype "protein_coding"; class_code "j"; transcript_id "TCONS_00000183"; gene_name "Nbeal1"; transcript_biotype "protein_coding"
NC_000067.7	Novogene	exon	60332026	60332123	.	+	.	nearest_ref "XM_006496030.5"; exon_number "45"; gene_id "269198"; transcript_name "TCONS_00000183"; gene_biotype "protein_coding"; class_code "j"; transcript_id "TCONS_00000183"; gene_name "Nbeal1"; transcript_biotype "protein_coding"
NC_000067.7	Novogene	exon	60335038	60335154	.	+	.	nearest_ref "XM_006496030.5"; exon_number "46"; gene_id "269198"; transcript_name "TCONS_00000183"; gene_biotype "protein_coding"; class_code "j"; transcript_id "TCONS_00000183"; gene_name "Nbeal1"; transcript_biotype "protein_coding"
NC_000067.7	Novogene	exon	60344434	60344523	.	+	.	nearest_ref "XM_006496030.5"; exon_number "47"; gene_id "269198"; transcript_name "TCONS_00000183"; gene_biotype "protein_coding"; class_code "j"; transcript_id "TCONS_00000183"; gene_name "Nbeal1"; transcript_biotype "protein_coding"
NC_000067.7	Novogene	exon	60349363	60349472	.	+	.	nearest_ref "XM_006496030.5"; exon_number "48"; gene_id "269198"; transcript_name "TCONS_00000183"; gene_biotype "protein_coding"; class_code "j"; transcript_id "TCONS_00000183"; gene_name "Nbeal1"; transcript_biotype "protein_coding"
NC_000067.7	Novogene	exon	60350086	60350258	.	+	.	nearest_ref "XM_006496030.5"; exon_number "49"; gene_id "269198"; transcript_name "TCONS_00000183"; gene_biotype "protein_coding"; class_code "j"; transcript_id "TCONS_00000183"; gene_name "Nbeal1"; transcript_biotype "protein_coding"
NC_000067.7	Novogene	exon	60351310	60351404	.	+	.	nearest_ref "XM_006496030.5"; exon_number "50"; gene_id "269198"; transcript_name "TCONS_00000183"; gene_biotype "protein_coding"; class_code "j"; transcript_id "TCONS_00000183"; gene_name "Nbeal1"; transcript_biotype "protein_coding"
NC_000067.7	Novogene	exon	60358476	60358592	.	+	.	nearest_ref "XM_006496030.5"; exon_number "51"; gene_id "269198"; transcript_name "TCONS_00000183"; gene_biotype "protein_coding"; class_code "j"; transcript_id "TCONS_00000183"; gene_name "Nbeal1"; transcript_biotype "protein_coding"
NC_000067.7	Novogene	exon	60358830	60358991	.	+	.	nearest_ref "XM_006496030.5"; exon_number "52"; gene_id "269198"; transcript_name "TCONS_00000183"; gene_biotype "protein_coding"; class_code "j"; transcript_id "TCONS_00000183"; gene_name "Nbeal1"; transcript_biotype "protein_coding"
NC_000067.7	Novogene	exon	60367219	60367367	.	+	.	nearest_ref "XM_006496030.5"; exon_number "53"; gene_id "269198"; transcript_name "TCONS_00000183"; gene_biotype "protein_coding"; class_code "j"; transcript_id "TCONS_00000183"; gene_name "Nbeal1"; transcript_biotype "protein_coding"
NC_000067.7	Novogene	exon	60368486	60368621	.	+	.	nearest_ref "XM_006496030.5"; exon_number "54"; gene_id "269198"; transcript_name "TCONS_00000183"; gene_biotype "protein_coding"; class_code "j"; transcript_id "TCONS_00000183"; gene_name "Nbeal1"; transcript_biotype "protein_coding"
NC_000067.7	Novogene	exon	60370050	60371235	.	+	.	nearest_ref "XM_006496030.5"; exon_number "55"; gene_id "269198"; transcript_name "TCONS_00000183"; gene_biotype "protein_coding"; class_code "j"; transcript_id "TCONS_00000183"; gene_name "Nbeal1"; transcript_biotype "protein_coding"
NC_000067.7	Novogene	exon	60371284	60377487	.	+	.	nearest_ref "XM_006496030.5"; exon_number "56"; gene_id "269198"; transcript_name "TCONS_00000183"; gene_biotype "protein_coding"; class_code "j"; transcript_id "TCONS_00000183"; gene_name "Nbeal1"; transcript_biotype "protein_coding"
NC_000067.7	Novogene	exon	60219915	60220206	.	+	.	nearest_ref "XM_006496030.5"; exon_number "1"; gene_id "269198"; transcript_name "TCONS_00000184"; gene_biotype "protein_coding"; class_code "j"; transcript_id "TCONS_00000184"; gene_name "Nbeal1"; transcript_biotype "protein_coding"
NC_000067.7	Novogene	exon	60220622	60220913	.	+	.	nearest_ref "XM_006496030.5"; exon_number "2"; gene_id "269198"; transcript_name "TCONS_00000184"; gene_biotype "protein_coding"; class_code "j"; transcript_id "TCONS_00000184"; gene_name "Nbeal1"; transcript_biotype "protein_coding"
NC_000067.7	Novogene	exon	60233663	60233754	.	+	.	nearest_ref "XM_006496030.5"; exon_number "3"; gene_id "269198"; transcript_name "TCONS_00000184"; gene_biotype "protein_coding"; class_code "j"; transcript_id "TCONS_00000184"; gene_name "Nbeal1"; transcript_biotype "protein_coding"
NC_000067.7	Novogene	exon	60234174	60234335	.	+	.	nearest_ref "XM_006496030.5"; exon_number "4"; gene_id "269198"; transcript_name "TCONS_00000184"; gene_biotype "protein_coding"; class_code "j"; transcript_id "TCONS_00000184"; gene_name "Nbeal1"; transcript_biotype "protein_coding"
NC_000067.7	Novogene	exon	60239264	60239345	.	+	.	nearest_ref "XM_006496030.5"; exon_number "5"; gene_id "269198"; transcript_name "TCONS_00000184"; gene_biotype "protein_coding"; class_code "j"; transcript_id "TCONS_00000184"; gene_name "Nbeal1"; transcript_biotype "protein_coding"
NC_000067.7	Novogene	exon	60240023	60240150	.	+	.	nearest_ref "XM_006496030.5"; exon_number "6"; gene_id "269198"; transcript_name "TCONS_00000184"; gene_biotype "protein_coding"; class_code "j"; transcript_id "TCONS_00000184"; gene_name "Nbeal1"; transcript_biotype "protein_coding"
NC_000067.7	Novogene	exon	60245493	60245575	.	+	.	nearest_ref "XM_006496030.5"; exon_number "7"; gene_id "269198"; transcript_name "TCONS_00000184"; gene_biotype "protein_coding"; class_code "j"; transcript_id "TCONS_00000184"; gene_name "Nbeal1"; transcript_biotype "protein_coding"
NC_000067.7	Novogene	exon	60261226	60261532	.	+	.	nearest_ref "XM_006496030.5"; exon_number "8"; gene_id "269198"; transcript_name "TCONS_00000184"; gene_biotype "protein_coding"; class_code "j"; transcript_id "TCONS_00000184"; gene_name "Nbeal1"; transcript_biotype "protein_coding"
NC_000067.7	Novogene	exon	60263784	60263890	.	+	.	nearest_ref "XM_006496030.5"; exon_number "9"; gene_id "269198"; transcript_name "TCONS_00000184"; gene_biotype "protein_coding"; class_code "j"; transcript_id "TCONS_00000184"; gene_name "Nbeal1"; transcript_biotype "protein_coding"
NC_000067.7	Novogene	exon	60269761	60269844	.	+	.	nearest_ref "XM_006496030.5"; exon_number "10"; gene_id "269198"; transcript_name "TCONS_00000184"; gene_biotype "protein_coding"; class_code "j"; transcript_id "TCONS_00000184"; gene_name "Nbeal1"; transcript_biotype "protein_coding"
NC_000067.7	Novogene	exon	60273956	60274054	.	+	.	nearest_ref "XM_006496030.5"; exon_number "11"; gene_id "269198"; transcript_name "TCONS_00000184"; gene_biotype "protein_coding"; class_code "j"; transcript_id "TCONS_00000184"; gene_name "Nbeal1"; transcript_biotype "protein_coding"
NC_000067.7	Novogene	exon	60274140	60274720	.	+	.	nearest_ref "XM_006496030.5"; exon_number "12"; gene_id "269198"; transcript_name "TCONS_00000184"; gene_biotype "protein_coding"; class_code "j"; transcript_id "TCONS_00000184"; gene_name "Nbeal1"; transcript_biotype "protein_coding"
NC_000067.7	Novogene	exon	60275530	60275662	.	+	.	nearest_ref "XM_006496030.5"; exon_number "13"; gene_id "269198"; transcript_name "TCONS_00000184"; gene_biotype "protein_coding"; class_code "j"; transcript_id "TCONS_00000184"; gene_name "Nbeal1"; transcript_biotype "protein_coding"
NC_000067.7	Novogene	exon	60276256	60276375	.	+	.	nearest_ref "XM_006496030.5"; exon_number "14"; gene_id "269198"; transcript_name "TCONS_00000184"; gene_biotype "protein_coding"; class_code "j"; transcript_id "TCONS_00000184"; gene_name "Nbeal1"; transcript_biotype "protein_coding"
NC_000067.7	Novogene	exon	60277731	60278034	.	+	.	nearest_ref "XM_006496030.5"; exon_number "15"; gene_id "269198"; transcript_name "TCONS_00000184"; gene_biotype "protein_coding"; class_code "j"; transcript_id "TCONS_00000184"; gene_name "Nbeal1"; transcript_biotype "protein_coding"
NC_000067.7	Novogene	exon	60281698	60281783	.	+	.	nearest_ref "XM_006496030.5"; exon_number "16"; gene_id "269198"; transcript_name "TCONS_00000184"; gene_biotype "protein_coding"; class_code "j"; transcript_id "TCONS_00000184"; gene_name "Nbeal1"; transcript_biotype "protein_coding"
NC_000067.7	Novogene	exon	60283953	60284042	.	+	.	nearest_ref "XM_006496030.5"; exon_number "17"; gene_id "269198"; transcript_name "TCONS_00000184"; gene_biotype "protein_coding"; class_code "j"; transcript_id "TCONS_00000184"; gene_name "Nbeal1"; transcript_biotype "protein_coding"
NC_000067.7	Novogene	exon	60286775	60286943	.	+	.	nearest_ref "XM_006496030.5"; exon_number "18"; gene_id "269198"; transcript_name "TCONS_00000184"; gene_biotype "protein_coding"; class_code "j"; transcript_id "TCONS_00000184"; gene_name "Nbeal1"; transcript_biotype "protein_coding"
NC_000067.7	Novogene	exon	60287522	60287655	.	+	.	nearest_ref "XM_006496030.5"; exon_number "19"; gene_id "269198"; transcript_name "TCONS_00000184"; gene_biotype "protein_coding"; class_code "j"; transcript_id "TCONS_00000184"; gene_name "Nbeal1"; transcript_biotype "protein_coding"
NC_000067.7	Novogene	exon	60290194	60290353	.	+	.	nearest_ref "XM_006496030.5"; exon_number "20"; gene_id "269198"; transcript_name "TCONS_00000184"; gene_biotype "protein_coding"; class_code "j"; transcript_id "TCONS_00000184"; gene_name "Nbeal1"; transcript_biotype "protein_coding"
NC_000067.7	Novogene	exon	60290463	60290565	.	+	.	nearest_ref "XM_006496030.5"; exon_number "21"; gene_id "269198"; transcript_name "TCONS_00000184"; gene_biotype "protein_coding"; class_code "j"; transcript_id "TCONS_00000184"; gene_name "Nbeal1"; transcript_biotype "protein_coding"
NC_000067.7	Novogene	exon	60292511	60292667	.	+	.	nearest_ref "XM_006496030.5"; exon_number "22"; gene_id "269198"; transcript_name "TCONS_00000184"; gene_biotype "protein_coding"; class_code "j"; transcript_id "TCONS_00000184"; gene_name "Nbeal1"; transcript_biotype "protein_coding"
NC_000067.7	Novogene	exon	60294053	60294211	.	+	.	nearest_ref "XM_006496030.5"; exon_number "23"; gene_id "269198"; transcript_name "TCONS_00000184"; gene_biotype "protein_coding"; class_code "j"; transcript_id "TCONS_00000184"; gene_name "Nbeal1"; transcript_biotype "protein_coding"
NC_000067.7	Novogene	exon	60296589	60296748	.	+	.	nearest_ref "XM_006496030.5"; exon_number "24"; gene_id "269198"; transcript_name "TCONS_00000184"; gene_biotype "protein_coding"; class_code "j"; transcript_id "TCONS_00000184"; gene_name "Nbeal1"; transcript_biotype "protein_coding"
NC_000067.7	Novogene	exon	60297809	60297897	.	+	.	nearest_ref "XM_006496030.5"; exon_number "25"; gene_id "269198"; transcript_name "TCONS_00000184"; gene_biotype "protein_coding"; class_code "j"; transcript_id "TCONS_00000184"; gene_name "Nbeal1"; transcript_biotype "protein_coding"
NC_000067.7	Novogene	exon	60299392	60299952	.	+	.	nearest_ref "XM_006496030.5"; exon_number "26"; gene_id "269198"; transcript_name "TCONS_00000184"; gene_biotype "protein_coding"; class_code "j"; transcript_id "TCONS_00000184"; gene_name "Nbeal1"; transcript_biotype "protein_coding"
NC_000067.7	Novogene	exon	60300569	60300744	.	+	.	nearest_ref "XM_006496030.5"; exon_number "27"; gene_id "269198"; transcript_name "TCONS_00000184"; gene_biotype "protein_coding"; class_code "j"; transcript_id "TCONS_00000184"; gene_name "Nbeal1"; transcript_biotype "protein_coding"
NC_000067.7	Novogene	exon	60303438	60303591	.	+	.	nearest_ref "XM_006496030.5"; exon_number "28"; gene_id "269198"; transcript_name "TCONS_00000184"; gene_biotype "protein_coding"; class_code "j"; transcript_id "TCONS_00000184"; gene_name "Nbeal1"; transcript_biotype "protein_coding"
NC_000067.7	Novogene	exon	60304041	60304169	.	+	.	nearest_ref "XM_006496030.5"; exon_number "29"; gene_id "269198"; transcript_name "TCONS_00000184"; gene_biotype "protein_coding"; class_code "j"; transcript_id "TCONS_00000184"; gene_name "Nbeal1"; transcript_biotype "protein_coding"
NC_000067.7	Novogene	exon	60306918	60307223	.	+	.	nearest_ref "XM_006496030.5"; exon_number "30"; gene_id "269198"; transcript_name "TCONS_00000184"; gene_biotype "protein_coding"; class_code "j"; transcript_id "TCONS_00000184"; gene_name "Nbeal1"; transcript_biotype "protein_coding"
NC_000067.7	Novogene	exon	60307542	60307691	.	+	.	nearest_ref "XM_006496030.5"; exon_number "31"; gene_id "269198"; transcript_name "TCONS_00000184"; gene_biotype "protein_coding"; class_code "j"; transcript_id "TCONS_00000184"; gene_name "Nbeal1"; transcript_biotype "protein_coding"
NC_000067.7	Novogene	exon	60309431	60309588	.	+	.	nearest_ref "XM_006496030.5"; exon_number "32"; gene_id "269198"; transcript_name "TCONS_00000184"; gene_biotype "protein_coding"; class_code "j"; transcript_id "TCONS_00000184"; gene_name "Nbeal1"; transcript_biotype "protein_coding"
NC_000067.7	Novogene	exon	60311292	60311416	.	+	.	nearest_ref "XM_006496030.5"; exon_number "33"; gene_id "269198"; transcript_name "TCONS_00000184"; gene_biotype "protein_coding"; class_code "j"; transcript_id "TCONS_00000184"; gene_name "Nbeal1"; transcript_biotype "protein_coding"
NC_000067.7	Novogene	exon	60316284	60316410	.	+	.	nearest_ref "XM_006496030.5"; exon_number "34"; gene_id "269198"; transcript_name "TCONS_00000184"; gene_biotype "protein_coding"; class_code "j"; transcript_id "TCONS_00000184"; gene_name "Nbeal1"; transcript_biotype "protein_coding"
NC_000067.7	Novogene	exon	60317072	60317220	.	+	.	nearest_ref "XM_006496030.5"; exon_number "35"; gene_id "269198"; transcript_name "TCONS_00000184"; gene_biotype "protein_coding"; class_code "j"; transcript_id "TCONS_00000184"; gene_name "Nbeal1"; transcript_biotype "protein_coding"
NC_000067.7	Novogene	exon	60317826	60317959	.	+	.	nearest_ref "XM_006496030.5"; exon_number "36"; gene_id "269198"; transcript_name "TCONS_00000184"; gene_biotype "protein_coding"; class_code "j"; transcript_id "TCONS_00000184"; gene_name "Nbeal1"; transcript_biotype "protein_coding"
NC_000067.7	Novogene	exon	60318858	60318959	.	+	.	nearest_ref "XM_006496030.5"; exon_number "37"; gene_id "269198"; transcript_name "TCONS_00000184"; gene_biotype "protein_coding"; class_code "j"; transcript_id "TCONS_00000184"; gene_name "Nbeal1"; transcript_biotype "protein_coding"
NC_000067.7	Novogene	exon	60320406	60320501	.	+	.	nearest_ref "XM_006496030.5"; exon_number "38"; gene_id "269198"; transcript_name "TCONS_00000184"; gene_biotype "protein_coding"; class_code "j"; transcript_id "TCONS_00000184"; gene_name "Nbeal1"; transcript_biotype "protein_coding"
NC_000067.7	Novogene	exon	60320984	60321108	.	+	.	nearest_ref "XM_006496030.5"; exon_number "39"; gene_id "269198"; transcript_name "TCONS_00000184"; gene_biotype "protein_coding"; class_code "j"; transcript_id "TCONS_00000184"; gene_name "Nbeal1"; transcript_biotype "protein_coding"
NC_000067.7	Novogene	exon	60323142	60323282	.	+	.	nearest_ref "XM_006496030.5"; exon_number "40"; gene_id "269198"; transcript_name "TCONS_00000184"; gene_biotype "protein_coding"; class_code "j"; transcript_id "TCONS_00000184"; gene_name "Nbeal1"; transcript_biotype "protein_coding"
NC_000067.7	Novogene	exon	60326470	60326600	.	+	.	nearest_ref "XM_006496030.5"; exon_number "41"; gene_id "269198"; transcript_name "TCONS_00000184"; gene_biotype "protein_coding"; class_code "j"; transcript_id "TCONS_00000184"; gene_name "Nbeal1"; transcript_biotype "protein_coding"
NC_000067.7	Novogene	exon	60329074	60329183	.	+	.	nearest_ref "XM_006496030.5"; exon_number "42"; gene_id "269198"; transcript_name "TCONS_00000184"; gene_biotype "protein_coding"; class_code "j"; transcript_id "TCONS_00000184"; gene_name "Nbeal1"; transcript_biotype "protein_coding"
NC_000067.7	Novogene	exon	60330993	60331110	.	+	.	nearest_ref "XM_006496030.5"; exon_number "43"; gene_id "269198"; transcript_name "TCONS_00000184"; gene_biotype "protein_coding"; class_code "j"; transcript_id "TCONS_00000184"; gene_name "Nbeal1"; transcript_biotype "protein_coding"
NC_000067.7	Novogene	exon	60332026	60332123	.	+	.	nearest_ref "XM_006496030.5"; exon_number "44"; gene_id "269198"; transcript_name "TCONS_00000184"; gene_biotype "protein_coding"; class_code "j"; transcript_id "TCONS_00000184"; gene_name "Nbeal1"; transcript_biotype "protein_coding"
NC_000067.7	Novogene	exon	60335038	60335154	.	+	.	nearest_ref "XM_006496030.5"; exon_number "45"; gene_id "269198"; transcript_name "TCONS_00000184"; gene_biotype "protein_coding"; class_code "j"; transcript_id "TCONS_00000184"; gene_name "Nbeal1"; transcript_biotype "protein_coding"
NC_000067.7	Novogene	exon	60344434	60344523	.	+	.	nearest_ref "XM_006496030.5"; exon_number "46"; gene_id "269198"; transcript_name "TCONS_00000184"; gene_biotype "protein_coding"; class_code "j"; transcript_id "TCONS_00000184"; gene_name "Nbeal1"; transcript_biotype "protein_coding"
NC_000067.7	Novogene	exon	60349363	60349472	.	+	.	nearest_ref "XM_006496030.5"; exon_number "47"; gene_id "269198"; transcript_name "TCONS_00000184"; gene_biotype "protein_coding"; class_code "j"; transcript_id "TCONS_00000184"; gene_name "Nbeal1"; transcript_biotype "protein_coding"
NC_000067.7	Novogene	exon	60350086	60350258	.	+	.	nearest_ref "XM_006496030.5"; exon_number "48"; gene_id "269198"; transcript_name "TCONS_00000184"; gene_biotype "protein_coding"; class_code "j"; transcript_id "TCONS_00000184"; gene_name "Nbeal1"; transcript_biotype "protein_coding"
NC_000067.7	Novogene	exon	60351310	60351404	.	+	.	nearest_ref "XM_006496030.5"; exon_number "49"; gene_id "269198"; transcript_name "TCONS_00000184"; gene_biotype "protein_coding"; class_code "j"; transcript_id "TCONS_00000184"; gene_name "Nbeal1"; transcript_biotype "protein_coding"
NC_000067.7	Novogene	exon	60358476	60358592	.	+	.	nearest_ref "XM_006496030.5"; exon_number "50"; gene_id "269198"; transcript_name "TCONS_00000184"; gene_biotype "protein_coding"; class_code "j"; transcript_id "TCONS_00000184"; gene_name "Nbeal1"; transcript_biotype "protein_coding"
NC_000067.7	Novogene	exon	60358830	60358991	.	+	.	nearest_ref "XM_006496030.5"; exon_number "51"; gene_id "269198"; transcript_name "TCONS_00000184"; gene_biotype "protein_coding"; class_code "j"; transcript_id "TCONS_00000184"; gene_name "Nbeal1"; transcript_biotype "protein_coding"
NC_000067.7	Novogene	exon	60367219	60367367	.	+	.	nearest_ref "XM_006496030.5"; exon_number "52"; gene_id "269198"; transcript_name "TCONS_00000184"; gene_biotype "protein_coding"; class_code "j"; transcript_id "TCONS_00000184"; gene_name "Nbeal1"; transcript_biotype "protein_coding"
NC_000067.7	Novogene	exon	60368486	60368621	.	+	.	nearest_ref "XM_006496030.5"; exon_number "53"; gene_id "269198"; transcript_name "TCONS_00000184"; gene_biotype "protein_coding"; class_code "j"; transcript_id "TCONS_00000184"; gene_name "Nbeal1"; transcript_biotype "protein_coding"
NC_000067.7	Novogene	exon	60370050	60373864	.	+	.	nearest_ref "XM_006496030.5"; exon_number "54"; gene_id "269198"; transcript_name "TCONS_00000184"; gene_biotype "protein_coding"; class_code "j"; transcript_id "TCONS_00000184"; gene_name "Nbeal1"; transcript_biotype "protein_coding"
NC_000067.7	Novogene	exon	60754550	60755038	.	+	.	nearest_ref "XM_036156388.1"; exon_number "1"; gene_id "12487"; transcript_name "TCONS_00000192"; gene_biotype "protein_coding"; class_code "j"; transcript_id "TCONS_00000192"; gene_name "Cd28"; transcript_biotype "protein_coding"
NC_000067.7	Novogene	exon	60802138	60802494	.	+	.	nearest_ref "XM_036156388.1"; exon_number "2"; gene_id "12487"; transcript_name "TCONS_00000192"; gene_biotype "protein_coding"; class_code "j"; transcript_id "TCONS_00000192"; gene_name "Cd28"; transcript_biotype "protein_coding"
NC_000067.7	Novogene	exon	60804436	60804551	.	+	.	nearest_ref "XM_036156388.1"; exon_number "3"; gene_id "12487"; transcript_name "TCONS_00000192"; gene_biotype "protein_coding"; class_code "j"; transcript_id "TCONS_00000192"; gene_name "Cd28"; transcript_biotype "protein_coding"
NC_000067.7	Novogene	exon	60808816	60812518	.	+	.	nearest_ref "XM_036156388.1"; exon_number "4"; gene_id "12487"; transcript_name "TCONS_00000192"; gene_biotype "protein_coding"; class_code "j"; transcript_id "TCONS_00000192"; gene_name "Cd28"; transcript_biotype "protein_coding"
NC_000067.7	Novogene	exon	60850258	60851013	.	+	.	nearest_ref "XR_865464.1"; exon_number "1"; gene_id "105243938"; transcript_name "TCONS_00000193"; gene_biotype "lncRNA"; class_code "j"; transcript_id "TCONS_00000193"; gene_name "Gm38137"; transcript_biotype "protein_coding"
NC_000067.7	Novogene	exon	60851390	60851512	.	+	.	nearest_ref "XR_865464.1"; exon_number "2"; gene_id "105243938"; transcript_name "TCONS_00000193"; gene_biotype "lncRNA"; class_code "j"; transcript_id "TCONS_00000193"; gene_name "Gm38137"; transcript_biotype "protein_coding"
NC_000067.7	Novogene	exon	60852742	60853042	.	+	.	nearest_ref "XR_865464.1"; exon_number "3"; gene_id "105243938"; transcript_name "TCONS_00000193"; gene_biotype "lncRNA"; class_code "j"; transcript_id "TCONS_00000193"; gene_name "Gm38137"; transcript_biotype "protein_coding"
NC_000067.7	Novogene	exon	60907666	60907781	.	+	.	nearest_ref "XR_865464.1"; exon_number "4"; gene_id "105243938"; transcript_name "TCONS_00000193"; gene_biotype "lncRNA"; class_code "j"; transcript_id "TCONS_00000193"; gene_name "Gm38137"; transcript_biotype "protein_coding"
NC_000067.7	Novogene	exon	60932886	60933020	.	+	.	nearest_ref "XR_865464.1"; exon_number "5"; gene_id "105243938"; transcript_name "TCONS_00000193"; gene_biotype "lncRNA"; class_code "j"; transcript_id "TCONS_00000193"; gene_name "Gm38137"; transcript_biotype "protein_coding"
NC_000067.7	Novogene	exon	60951582	60951929	.	+	.	nearest_ref "XR_865464.1"; exon_number "6"; gene_id "105243938"; transcript_name "TCONS_00000193"; gene_biotype "lncRNA"; class_code "j"; transcript_id "TCONS_00000193"; gene_name "Gm38137"; transcript_biotype "protein_coding"
NC_000067.7	Novogene	exon	60952378	60952487	.	+	.	nearest_ref "XR_865464.1"; exon_number "7"; gene_id "105243938"; transcript_name "TCONS_00000193"; gene_biotype "lncRNA"; class_code "j"; transcript_id "TCONS_00000193"; gene_name "Gm38137"; transcript_biotype "protein_coding"
NC_000067.7	Novogene	exon	60953772	60954948	.	+	.	nearest_ref "XR_865464.1"; exon_number "8"; gene_id "105243938"; transcript_name "TCONS_00000193"; gene_biotype "lncRNA"; class_code "j"; transcript_id "TCONS_00000193"; gene_name "Gm38137"; transcript_biotype "protein_coding"
NC_000067.7	Novogene	exon	63182346	63183081	.	+	.	nearest_ref "NM_018796.3"; exon_number "1"; gene_id "55949"; transcript_name "TCONS_00000202"; gene_biotype "protein_coding"; class_code "j"; transcript_id "TCONS_00000202"; gene_name "Eef1b2"; transcript_biotype "protein_coding"
NC_000067.7	Novogene	exon	63186279	63186351	.	+	.	nearest_ref "NM_018796.3"; exon_number "2"; gene_id "55949"; transcript_name "TCONS_00000202"; gene_biotype "protein_coding"; class_code "j"; transcript_id "TCONS_00000202"; gene_name "Eef1b2"; transcript_biotype "protein_coding"
NC_000067.7	Novogene	exon	63186449	63186583	.	+	.	nearest_ref "NM_018796.3"; exon_number "3"; gene_id "55949"; transcript_name "TCONS_00000202"; gene_biotype "protein_coding"; class_code "j"; transcript_id "TCONS_00000202"; gene_name "Eef1b2"; transcript_biotype "protein_coding"
NC_000067.7	Novogene	exon	63187555	63187730	.	+	.	nearest_ref "NM_018796.3"; exon_number "4"; gene_id "55949"; transcript_name "TCONS_00000202"; gene_biotype "protein_coding"; class_code "j"; transcript_id "TCONS_00000202"; gene_name "Eef1b2"; transcript_biotype "protein_coding"
NC_000067.7	Novogene	exon	63189116	63189270	.	+	.	nearest_ref "NM_018796.3"; exon_number "5"; gene_id "55949"; transcript_name "TCONS_00000202"; gene_biotype "protein_coding"; class_code "j"; transcript_id "TCONS_00000202"; gene_name "Eef1b2"; transcript_biotype "protein_coding"
NC_000067.7	Novogene	exon	63190710	63190870	.	+	.	nearest_ref "NM_018796.3"; exon_number "6"; gene_id "55949"; transcript_name "TCONS_00000202"; gene_biotype "protein_coding"; class_code "j"; transcript_id "TCONS_00000202"; gene_name "Eef1b2"; transcript_biotype "protein_coding"
NC_000067.7	Novogene	exon	63191934	63192063	.	+	.	nearest_ref "NM_018796.3"; exon_number "7"; gene_id "55949"; transcript_name "TCONS_00000202"; gene_biotype "protein_coding"; class_code "j"; transcript_id "TCONS_00000202"; gene_name "Eef1b2"; transcript_biotype "protein_coding"
NC_000067.7	Novogene	exon	63195363	63195491	.	+	.	nearest_ref "NM_018796.3"; exon_number "8"; gene_id "55949"; transcript_name "TCONS_00000202"; gene_biotype "protein_coding"; class_code "j"; transcript_id "TCONS_00000202"; gene_name "Eef1b2"; transcript_biotype "protein_coding"
NC_000067.7	Novogene	exon	63196291	63196436	.	+	.	nearest_ref "NM_018796.3"; exon_number "9"; gene_id "55949"; transcript_name "TCONS_00000202"; gene_biotype "protein_coding"; class_code "j"; transcript_id "TCONS_00000202"; gene_name "Eef1b2"; transcript_biotype "protein_coding"
NC_000067.7	Novogene	exon	63198909	63199023	.	+	.	nearest_ref "NM_018796.3"; exon_number "10"; gene_id "55949"; transcript_name "TCONS_00000202"; gene_biotype "protein_coding"; class_code "j"; transcript_id "TCONS_00000202"; gene_name "Eef1b2"; transcript_biotype "protein_coding"
NC_000067.7	Novogene	exon	63200039	63200173	.	+	.	nearest_ref "NM_018796.3"; exon_number "11"; gene_id "55949"; transcript_name "TCONS_00000202"; gene_biotype "protein_coding"; class_code "j"; transcript_id "TCONS_00000202"; gene_name "Eef1b2"; transcript_biotype "protein_coding"
NC_000067.7	Novogene	exon	63202826	63203011	.	+	.	nearest_ref "NM_018796.3"; exon_number "12"; gene_id "55949"; transcript_name "TCONS_00000202"; gene_biotype "protein_coding"; class_code "j"; transcript_id "TCONS_00000202"; gene_name "Eef1b2"; transcript_biotype "protein_coding"
NC_000067.7	Novogene	exon	63203889	63204019	.	+	.	nearest_ref "NM_018796.3"; exon_number "13"; gene_id "55949"; transcript_name "TCONS_00000202"; gene_biotype "protein_coding"; class_code "j"; transcript_id "TCONS_00000202"; gene_name "Eef1b2"; transcript_biotype "protein_coding"
NC_000067.7	Novogene	exon	63204108	63204189	.	+	.	nearest_ref "NM_018796.3"; exon_number "14"; gene_id "55949"; transcript_name "TCONS_00000202"; gene_biotype "protein_coding"; class_code "j"; transcript_id "TCONS_00000202"; gene_name "Eef1b2"; transcript_biotype "protein_coding"
NC_000067.7	Novogene	exon	63205450	63205526	.	+	.	nearest_ref "NM_018796.3"; exon_number "15"; gene_id "55949"; transcript_name "TCONS_00000202"; gene_biotype "protein_coding"; class_code "j"; transcript_id "TCONS_00000202"; gene_name "Eef1b2"; transcript_biotype "protein_coding"
NC_000067.7	Novogene	exon	63208388	63208495	.	+	.	nearest_ref "NM_018796.3"; exon_number "16"; gene_id "55949"; transcript_name "TCONS_00000202"; gene_biotype "protein_coding"; class_code "j"; transcript_id "TCONS_00000202"; gene_name "Eef1b2"; transcript_biotype "protein_coding"
NC_000067.7	Novogene	exon	63209209	63209300	.	+	.	nearest_ref "NM_018796.3"; exon_number "17"; gene_id "55949"; transcript_name "TCONS_00000202"; gene_biotype "protein_coding"; class_code "j"; transcript_id "TCONS_00000202"; gene_name "Eef1b2"; transcript_biotype "protein_coding"
NC_000067.7	Novogene	exon	63210008	63210073	.	+	.	nearest_ref "NM_018796.3"; exon_number "18"; gene_id "55949"; transcript_name "TCONS_00000202"; gene_biotype "protein_coding"; class_code "j"; transcript_id "TCONS_00000202"; gene_name "Eef1b2"; transcript_biotype "protein_coding"
NC_000067.7	Novogene	exon	63215587	63216450	.	+	.	nearest_ref "NM_018796.3"; exon_number "19"; gene_id "55949"; transcript_name "TCONS_00000202"; gene_biotype "protein_coding"; class_code "j"; transcript_id "TCONS_00000202"; gene_name "Eef1b2"; transcript_biotype "protein_coding"
NC_000067.7	Novogene	exon	63216913	63217035	.	+	.	nearest_ref "NM_018796.3"; exon_number "20"; gene_id "55949"; transcript_name "TCONS_00000202"; gene_biotype "protein_coding"; class_code "j"; transcript_id "TCONS_00000202"; gene_name "Eef1b2"; transcript_biotype "protein_coding"
NC_000067.7	Novogene	exon	63217598	63217724	.	+	.	nearest_ref "NM_018796.3"; exon_number "21"; gene_id "55949"; transcript_name "TCONS_00000202"; gene_biotype "protein_coding"; class_code "j"; transcript_id "TCONS_00000202"; gene_name "Eef1b2"; transcript_biotype "protein_coding"
NC_000067.7	Novogene	exon	63217991	63218057	.	+	.	nearest_ref "NM_018796.3"; exon_number "22"; gene_id "55949"; transcript_name "TCONS_00000202"; gene_biotype "protein_coding"; class_code "j"; transcript_id "TCONS_00000202"; gene_name "Eef1b2"; transcript_biotype "protein_coding"
NC_000067.7	Novogene	exon	63218407	63218532	.	+	.	nearest_ref "NM_018796.3"; exon_number "23"; gene_id "55949"; transcript_name "TCONS_00000202"; gene_biotype "protein_coding"; class_code "j"; transcript_id "TCONS_00000202"; gene_name "Eef1b2"; transcript_biotype "protein_coding"
NC_000067.7	Novogene	exon	63218617	63219645	.	+	.	nearest_ref "NM_018796.3"; exon_number "24"; gene_id "55949"; transcript_name "TCONS_00000202"; gene_biotype "protein_coding"; class_code "j"; transcript_id "TCONS_00000202"; gene_name "Eef1b2"; transcript_biotype "protein_coding"
NC_000067.7	Novogene	exon	63182346	63183081	.	+	.	nearest_ref "NM_018796.3"; exon_number "1"; gene_id "55949"; transcript_name "TCONS_00000201"; gene_biotype "protein_coding"; class_code "j"; transcript_id "TCONS_00000201"; gene_name "Eef1b2"; transcript_biotype "protein_coding"
NC_000067.7	Novogene	exon	63186279	63186351	.	+	.	nearest_ref "NM_018796.3"; exon_number "2"; gene_id "55949"; transcript_name "TCONS_00000201"; gene_biotype "protein_coding"; class_code "j"; transcript_id "TCONS_00000201"; gene_name "Eef1b2"; transcript_biotype "protein_coding"
NC_000067.7	Novogene	exon	63186449	63186583	.	+	.	nearest_ref "NM_018796.3"; exon_number "3"; gene_id "55949"; transcript_name "TCONS_00000201"; gene_biotype "protein_coding"; class_code "j"; transcript_id "TCONS_00000201"; gene_name "Eef1b2"; transcript_biotype "protein_coding"
NC_000067.7	Novogene	exon	63187555	63187730	.	+	.	nearest_ref "NM_018796.3"; exon_number "4"; gene_id "55949"; transcript_name "TCONS_00000201"; gene_biotype "protein_coding"; class_code "j"; transcript_id "TCONS_00000201"; gene_name "Eef1b2"; transcript_biotype "protein_coding"
NC_000067.7	Novogene	exon	63189116	63189270	.	+	.	nearest_ref "NM_018796.3"; exon_number "5"; gene_id "55949"; transcript_name "TCONS_00000201"; gene_biotype "protein_coding"; class_code "j"; transcript_id "TCONS_00000201"; gene_name "Eef1b2"; transcript_biotype "protein_coding"
NC_000067.7	Novogene	exon	63190710	63190870	.	+	.	nearest_ref "NM_018796.3"; exon_number "6"; gene_id "55949"; transcript_name "TCONS_00000201"; gene_biotype "protein_coding"; class_code "j"; transcript_id "TCONS_00000201"; gene_name "Eef1b2"; transcript_biotype "protein_coding"
NC_000067.7	Novogene	exon	63191934	63192063	.	+	.	nearest_ref "NM_018796.3"; exon_number "7"; gene_id "55949"; transcript_name "TCONS_00000201"; gene_biotype "protein_coding"; class_code "j"; transcript_id "TCONS_00000201"; gene_name "Eef1b2"; transcript_biotype "protein_coding"
NC_000067.7	Novogene	exon	63195363	63195491	.	+	.	nearest_ref "NM_018796.3"; exon_number "8"; gene_id "55949"; transcript_name "TCONS_00000201"; gene_biotype "protein_coding"; class_code "j"; transcript_id "TCONS_00000201"; gene_name "Eef1b2"; transcript_biotype "protein_coding"
NC_000067.7	Novogene	exon	63196291	63196436	.	+	.	nearest_ref "NM_018796.3"; exon_number "9"; gene_id "55949"; transcript_name "TCONS_00000201"; gene_biotype "protein_coding"; class_code "j"; transcript_id "TCONS_00000201"; gene_name "Eef1b2"; transcript_biotype "protein_coding"
NC_000067.7	Novogene	exon	63198909	63199023	.	+	.	nearest_ref "NM_018796.3"; exon_number "10"; gene_id "55949"; transcript_name "TCONS_00000201"; gene_biotype "protein_coding"; class_code "j"; transcript_id "TCONS_00000201"; gene_name "Eef1b2"; transcript_biotype "protein_coding"
NC_000067.7	Novogene	exon	63200039	63200173	.	+	.	nearest_ref "NM_018796.3"; exon_number "11"; gene_id "55949"; transcript_name "TCONS_00000201"; gene_biotype "protein_coding"; class_code "j"; transcript_id "TCONS_00000201"; gene_name "Eef1b2"; transcript_biotype "protein_coding"
NC_000067.7	Novogene	exon	63202826	63203011	.	+	.	nearest_ref "NM_018796.3"; exon_number "12"; gene_id "55949"; transcript_name "TCONS_00000201"; gene_biotype "protein_coding"; class_code "j"; transcript_id "TCONS_00000201"; gene_name "Eef1b2"; transcript_biotype "protein_coding"
NC_000067.7	Novogene	exon	63203889	63204019	.	+	.	nearest_ref "NM_018796.3"; exon_number "13"; gene_id "55949"; transcript_name "TCONS_00000201"; gene_biotype "protein_coding"; class_code "j"; transcript_id "TCONS_00000201"; gene_name "Eef1b2"; transcript_biotype "protein_coding"
NC_000067.7	Novogene	exon	63204108	63204189	.	+	.	nearest_ref "NM_018796.3"; exon_number "14"; gene_id "55949"; transcript_name "TCONS_00000201"; gene_biotype "protein_coding"; class_code "j"; transcript_id "TCONS_00000201"; gene_name "Eef1b2"; transcript_biotype "protein_coding"
NC_000067.7	Novogene	exon	63205450	63205526	.	+	.	nearest_ref "NM_018796.3"; exon_number "15"; gene_id "55949"; transcript_name "TCONS_00000201"; gene_biotype "protein_coding"; class_code "j"; transcript_id "TCONS_00000201"; gene_name "Eef1b2"; transcript_biotype "protein_coding"
NC_000067.7	Novogene	exon	63208388	63208495	.	+	.	nearest_ref "NM_018796.3"; exon_number "16"; gene_id "55949"; transcript_name "TCONS_00000201"; gene_biotype "protein_coding"; class_code "j"; transcript_id "TCONS_00000201"; gene_name "Eef1b2"; transcript_biotype "protein_coding"
NC_000067.7	Novogene	exon	63209209	63209300	.	+	.	nearest_ref "NM_018796.3"; exon_number "17"; gene_id "55949"; transcript_name "TCONS_00000201"; gene_biotype "protein_coding"; class_code "j"; transcript_id "TCONS_00000201"; gene_name "Eef1b2"; transcript_biotype "protein_coding"
NC_000067.7	Novogene	exon	63210008	63210073	.	+	.	nearest_ref "NM_018796.3"; exon_number "18"; gene_id "55949"; transcript_name "TCONS_00000201"; gene_biotype "protein_coding"; class_code "j"; transcript_id "TCONS_00000201"; gene_name "Eef1b2"; transcript_biotype "protein_coding"
NC_000067.7	Novogene	exon	63215745	63216450	.	+	.	nearest_ref "NM_018796.3"; exon_number "19"; gene_id "55949"; transcript_name "TCONS_00000201"; gene_biotype "protein_coding"; class_code "j"; transcript_id "TCONS_00000201"; gene_name "Eef1b2"; transcript_biotype "protein_coding"
NC_000067.7	Novogene	exon	63216913	63217035	.	+	.	nearest_ref "NM_018796.3"; exon_number "20"; gene_id "55949"; transcript_name "TCONS_00000201"; gene_biotype "protein_coding"; class_code "j"; transcript_id "TCONS_00000201"; gene_name "Eef1b2"; transcript_biotype "protein_coding"
NC_000067.7	Novogene	exon	63217598	63217724	.	+	.	nearest_ref "NM_018796.3"; exon_number "21"; gene_id "55949"; transcript_name "TCONS_00000201"; gene_biotype "protein_coding"; class_code "j"; transcript_id "TCONS_00000201"; gene_name "Eef1b2"; transcript_biotype "protein_coding"
NC_000067.7	Novogene	exon	63217991	63218057	.	+	.	nearest_ref "NM_018796.3"; exon_number "22"; gene_id "55949"; transcript_name "TCONS_00000201"; gene_biotype "protein_coding"; class_code "j"; transcript_id "TCONS_00000201"; gene_name "Eef1b2"; transcript_biotype "protein_coding"
NC_000067.7	Novogene	exon	63218407	63218532	.	+	.	nearest_ref "NM_018796.3"; exon_number "23"; gene_id "55949"; transcript_name "TCONS_00000201"; gene_biotype "protein_coding"; class_code "j"; transcript_id "TCONS_00000201"; gene_name "Eef1b2"; transcript_biotype "protein_coding"
NC_000067.7	Novogene	exon	63218617	63219645	.	+	.	nearest_ref "NM_018796.3"; exon_number "24"; gene_id "55949"; transcript_name "TCONS_00000201"; gene_biotype "protein_coding"; class_code "j"; transcript_id "TCONS_00000201"; gene_name "Eef1b2"; transcript_biotype "protein_coding"
NC_000067.7	Novogene	exon	63182802	63183344	.	+	.	nearest_ref "NM_018796.3"; exon_number "1"; gene_id "55949"; transcript_name "TCONS_00000204"; gene_biotype "protein_coding"; class_code "j"; transcript_id "TCONS_00000204"; gene_name "Eef1b2"; transcript_biotype "protein_coding"
NC_000067.7	Novogene	exon	63195379	63195491	.	+	.	nearest_ref "NM_018796.3"; exon_number "2"; gene_id "55949"; transcript_name "TCONS_00000204"; gene_biotype "protein_coding"; class_code "j"; transcript_id "TCONS_00000204"; gene_name "Eef1b2"; transcript_biotype "protein_coding"
NC_000067.7	Novogene	exon	63196291	63196436	.	+	.	nearest_ref "NM_018796.3"; exon_number "3"; gene_id "55949"; transcript_name "TCONS_00000204"; gene_biotype "protein_coding"; class_code "j"; transcript_id "TCONS_00000204"; gene_name "Eef1b2"; transcript_biotype "protein_coding"
NC_000067.7	Novogene	exon	63198909	63199023	.	+	.	nearest_ref "NM_018796.3"; exon_number "4"; gene_id "55949"; transcript_name "TCONS_00000204"; gene_biotype "protein_coding"; class_code "j"; transcript_id "TCONS_00000204"; gene_name "Eef1b2"; transcript_biotype "protein_coding"
NC_000067.7	Novogene	exon	63200039	63200173	.	+	.	nearest_ref "NM_018796.3"; exon_number "5"; gene_id "55949"; transcript_name "TCONS_00000204"; gene_biotype "protein_coding"; class_code "j"; transcript_id "TCONS_00000204"; gene_name "Eef1b2"; transcript_biotype "protein_coding"
NC_000067.7	Novogene	exon	63202826	63203011	.	+	.	nearest_ref "NM_018796.3"; exon_number "6"; gene_id "55949"; transcript_name "TCONS_00000204"; gene_biotype "protein_coding"; class_code "j"; transcript_id "TCONS_00000204"; gene_name "Eef1b2"; transcript_biotype "protein_coding"
NC_000067.7	Novogene	exon	63203889	63204019	.	+	.	nearest_ref "NM_018796.3"; exon_number "7"; gene_id "55949"; transcript_name "TCONS_00000204"; gene_biotype "protein_coding"; class_code "j"; transcript_id "TCONS_00000204"; gene_name "Eef1b2"; transcript_biotype "protein_coding"
NC_000067.7	Novogene	exon	63204108	63204189	.	+	.	nearest_ref "NM_018796.3"; exon_number "8"; gene_id "55949"; transcript_name "TCONS_00000204"; gene_biotype "protein_coding"; class_code "j"; transcript_id "TCONS_00000204"; gene_name "Eef1b2"; transcript_biotype "protein_coding"
NC_000067.7	Novogene	exon	63205450	63205526	.	+	.	nearest_ref "NM_018796.3"; exon_number "9"; gene_id "55949"; transcript_name "TCONS_00000204"; gene_biotype "protein_coding"; class_code "j"; transcript_id "TCONS_00000204"; gene_name "Eef1b2"; transcript_biotype "protein_coding"
NC_000067.7	Novogene	exon	63208388	63208495	.	+	.	nearest_ref "NM_018796.3"; exon_number "10"; gene_id "55949"; transcript_name "TCONS_00000204"; gene_biotype "protein_coding"; class_code "j"; transcript_id "TCONS_00000204"; gene_name "Eef1b2"; transcript_biotype "protein_coding"
NC_000067.7	Novogene	exon	63209209	63209300	.	+	.	nearest_ref "NM_018796.3"; exon_number "11"; gene_id "55949"; transcript_name "TCONS_00000204"; gene_biotype "protein_coding"; class_code "j"; transcript_id "TCONS_00000204"; gene_name "Eef1b2"; transcript_biotype "protein_coding"
NC_000067.7	Novogene	exon	63210008	63210073	.	+	.	nearest_ref "NM_018796.3"; exon_number "12"; gene_id "55949"; transcript_name "TCONS_00000204"; gene_biotype "protein_coding"; class_code "j"; transcript_id "TCONS_00000204"; gene_name "Eef1b2"; transcript_biotype "protein_coding"
NC_000067.7	Novogene	exon	63215587	63216450	.	+	.	nearest_ref "NM_018796.3"; exon_number "13"; gene_id "55949"; transcript_name "TCONS_00000204"; gene_biotype "protein_coding"; class_code "j"; transcript_id "TCONS_00000204"; gene_name "Eef1b2"; transcript_biotype "protein_coding"
NC_000067.7	Novogene	exon	63216913	63217035	.	+	.	nearest_ref "NM_018796.3"; exon_number "14"; gene_id "55949"; transcript_name "TCONS_00000204"; gene_biotype "protein_coding"; class_code "j"; transcript_id "TCONS_00000204"; gene_name "Eef1b2"; transcript_biotype "protein_coding"
NC_000067.7	Novogene	exon	63217598	63217724	.	+	.	nearest_ref "NM_018796.3"; exon_number "15"; gene_id "55949"; transcript_name "TCONS_00000204"; gene_biotype "protein_coding"; class_code "j"; transcript_id "TCONS_00000204"; gene_name "Eef1b2"; transcript_biotype "protein_coding"
NC_000067.7	Novogene	exon	63217991	63218057	.	+	.	nearest_ref "NM_018796.3"; exon_number "16"; gene_id "55949"; transcript_name "TCONS_00000204"; gene_biotype "protein_coding"; class_code "j"; transcript_id "TCONS_00000204"; gene_name "Eef1b2"; transcript_biotype "protein_coding"
NC_000067.7	Novogene	exon	63218407	63218532	.	+	.	nearest_ref "NM_018796.3"; exon_number "17"; gene_id "55949"; transcript_name "TCONS_00000204"; gene_biotype "protein_coding"; class_code "j"; transcript_id "TCONS_00000204"; gene_name "Eef1b2"; transcript_biotype "protein_coding"
NC_000067.7	Novogene	exon	63218617	63218815	.	+	.	nearest_ref "NM_018796.3"; exon_number "18"; gene_id "55949"; transcript_name "TCONS_00000204"; gene_biotype "protein_coding"; class_code "j"; transcript_id "TCONS_00000204"; gene_name "Eef1b2"; transcript_biotype "protein_coding"
NC_000067.7	Novogene	exon	75187492	75187696	.	+	.	nearest_ref "NR_102731.1"; exon_number "1"; gene_id "20872"; transcript_name "TCONS_00000253"; gene_biotype "protein_coding"; class_code "j"; transcript_id "TCONS_00000253"; gene_name "Stk16"; transcript_biotype "protein_coding"
NC_000067.7	Novogene	exon	75187884	75188058	.	+	.	nearest_ref "NR_102731.1"; exon_number "2"; gene_id "20872"; transcript_name "TCONS_00000253"; gene_biotype "protein_coding"; class_code "j"; transcript_id "TCONS_00000253"; gene_name "Stk16"; transcript_biotype "protein_coding"
NC_000067.7	Novogene	exon	75188569	75188788	.	+	.	nearest_ref "NR_102731.1"; exon_number "3"; gene_id "20872"; transcript_name "TCONS_00000253"; gene_biotype "protein_coding"; class_code "j"; transcript_id "TCONS_00000253"; gene_name "Stk16"; transcript_biotype "protein_coding"
NC_000067.7	Novogene	exon	75189244	75189377	.	+	.	nearest_ref "NR_102731.1"; exon_number "4"; gene_id "20872"; transcript_name "TCONS_00000253"; gene_biotype "protein_coding"; class_code "j"; transcript_id "TCONS_00000253"; gene_name "Stk16"; transcript_biotype "protein_coding"
NC_000067.7	Novogene	exon	75189530	75189650	.	+	.	nearest_ref "NR_102731.1"; exon_number "5"; gene_id "20872"; transcript_name "TCONS_00000253"; gene_biotype "protein_coding"; class_code "j"; transcript_id "TCONS_00000253"; gene_name "Stk16"; transcript_biotype "protein_coding"
NC_000067.7	Novogene	exon	75189777	75189872	.	+	.	nearest_ref "NR_102731.1"; exon_number "6"; gene_id "20872"; transcript_name "TCONS_00000253"; gene_biotype "protein_coding"; class_code "j"; transcript_id "TCONS_00000253"; gene_name "Stk16"; transcript_biotype "protein_coding"
NC_000067.7	Novogene	exon	75190220	75190341	.	+	.	nearest_ref "NR_102731.1"; exon_number "7"; gene_id "20872"; transcript_name "TCONS_00000253"; gene_biotype "protein_coding"; class_code "j"; transcript_id "TCONS_00000253"; gene_name "Stk16"; transcript_biotype "protein_coding"
NC_000067.7	Novogene	exon	75190458	75193237	.	+	.	nearest_ref "NR_102731.1"; exon_number "8"; gene_id "20872"; transcript_name "TCONS_00000253"; gene_biotype "protein_coding"; class_code "j"; transcript_id "TCONS_00000253"; gene_name "Stk16"; transcript_biotype "protein_coding"
NC_000067.7	Novogene	exon	75193471	75193619	.	+	.	nearest_ref "NR_102731.1"; exon_number "9"; gene_id "20872"; transcript_name "TCONS_00000253"; gene_biotype "protein_coding"; class_code "j"; transcript_id "TCONS_00000253"; gene_name "Stk16"; transcript_biotype "protein_coding"
NC_000067.7	Novogene	exon	75193856	75194078	.	+	.	nearest_ref "NR_102731.1"; exon_number "10"; gene_id "20872"; transcript_name "TCONS_00000253"; gene_biotype "protein_coding"; class_code "j"; transcript_id "TCONS_00000253"; gene_name "Stk16"; transcript_biotype "protein_coding"
NC_000067.7	Novogene	exon	75195837	75196091	.	+	.	nearest_ref "NR_102731.1"; exon_number "11"; gene_id "20872"; transcript_name "TCONS_00000253"; gene_biotype "protein_coding"; class_code "j"; transcript_id "TCONS_00000253"; gene_name "Stk16"; transcript_biotype "protein_coding"
NC_000067.7	Novogene	exon	75187499	75187696	.	+	.	nearest_ref "NR_102731.1"; exon_number "1"; gene_id "20872"; transcript_name "TCONS_00000254"; gene_biotype "protein_coding"; class_code "j"; transcript_id "TCONS_00000254"; gene_name "Stk16"; transcript_biotype "protein_coding"
NC_000067.7	Novogene	exon	75187884	75188058	.	+	.	nearest_ref "NR_102731.1"; exon_number "2"; gene_id "20872"; transcript_name "TCONS_00000254"; gene_biotype "protein_coding"; class_code "j"; transcript_id "TCONS_00000254"; gene_name "Stk16"; transcript_biotype "protein_coding"
NC_000067.7	Novogene	exon	75188569	75188788	.	+	.	nearest_ref "NR_102731.1"; exon_number "3"; gene_id "20872"; transcript_name "TCONS_00000254"; gene_biotype "protein_coding"; class_code "j"; transcript_id "TCONS_00000254"; gene_name "Stk16"; transcript_biotype "protein_coding"
NC_000067.7	Novogene	exon	75189244	75189377	.	+	.	nearest_ref "NR_102731.1"; exon_number "4"; gene_id "20872"; transcript_name "TCONS_00000254"; gene_biotype "protein_coding"; class_code "j"; transcript_id "TCONS_00000254"; gene_name "Stk16"; transcript_biotype "protein_coding"
NC_000067.7	Novogene	exon	75189530	75189650	.	+	.	nearest_ref "NR_102731.1"; exon_number "5"; gene_id "20872"; transcript_name "TCONS_00000254"; gene_biotype "protein_coding"; class_code "j"; transcript_id "TCONS_00000254"; gene_name "Stk16"; transcript_biotype "protein_coding"
NC_000067.7	Novogene	exon	75189777	75189872	.	+	.	nearest_ref "NR_102731.1"; exon_number "6"; gene_id "20872"; transcript_name "TCONS_00000254"; gene_biotype "protein_coding"; class_code "j"; transcript_id "TCONS_00000254"; gene_name "Stk16"; transcript_biotype "protein_coding"
NC_000067.7	Novogene	exon	75190220	75190341	.	+	.	nearest_ref "NR_102731.1"; exon_number "7"; gene_id "20872"; transcript_name "TCONS_00000254"; gene_biotype "protein_coding"; class_code "j"; transcript_id "TCONS_00000254"; gene_name "Stk16"; transcript_biotype "protein_coding"
NC_000067.7	Novogene	exon	75190458	75193237	.	+	.	nearest_ref "NR_102731.1"; exon_number "8"; gene_id "20872"; transcript_name "TCONS_00000254"; gene_biotype "protein_coding"; class_code "j"; transcript_id "TCONS_00000254"; gene_name "Stk16"; transcript_biotype "protein_coding"
NC_000067.7	Novogene	exon	75193471	75193619	.	+	.	nearest_ref "NR_102731.1"; exon_number "9"; gene_id "20872"; transcript_name "TCONS_00000254"; gene_biotype "protein_coding"; class_code "j"; transcript_id "TCONS_00000254"; gene_name "Stk16"; transcript_biotype "protein_coding"
NC_000067.7	Novogene	exon	75193856	75194078	.	+	.	nearest_ref "NR_102731.1"; exon_number "10"; gene_id "20872"; transcript_name "TCONS_00000254"; gene_biotype "protein_coding"; class_code "j"; transcript_id "TCONS_00000254"; gene_name "Stk16"; transcript_biotype "protein_coding"
NC_000067.7	Novogene	exon	75195069	75195111	.	+	.	nearest_ref "NR_102731.1"; exon_number "11"; gene_id "20872"; transcript_name "TCONS_00000254"; gene_biotype "protein_coding"; class_code "j"; transcript_id "TCONS_00000254"; gene_name "Stk16"; transcript_biotype "protein_coding"
NC_000067.7	Novogene	exon	75213067	75213233	.	+	.	nearest_ref "XM_006496511.2"; exon_number "1"; gene_id "56812"; transcript_name "TCONS_00000257"; gene_biotype "protein_coding"; class_code "j"; transcript_id "TCONS_00000257"; gene_name "Dnajb2"; transcript_biotype "protein_coding"
NC_000067.7	Novogene	exon	75213496	75213592	.	+	.	nearest_ref "XM_006496511.2"; exon_number "2"; gene_id "56812"; transcript_name "TCONS_00000257"; gene_biotype "protein_coding"; class_code "j"; transcript_id "TCONS_00000257"; gene_name "Dnajb2"; transcript_biotype "protein_coding"
NC_000067.7	Novogene	exon	75214099	75214208	.	+	.	nearest_ref "XM_006496511.2"; exon_number "3"; gene_id "56812"; transcript_name "TCONS_00000257"; gene_biotype "protein_coding"; class_code "j"; transcript_id "TCONS_00000257"; gene_name "Dnajb2"; transcript_biotype "protein_coding"
NC_000067.7	Novogene	exon	75215924	75215977	.	+	.	nearest_ref "XM_006496511.2"; exon_number "4"; gene_id "56812"; transcript_name "TCONS_00000257"; gene_biotype "protein_coding"; class_code "j"; transcript_id "TCONS_00000257"; gene_name "Dnajb2"; transcript_biotype "protein_coding"
NC_000067.7	Novogene	exon	75216152	75216274	.	+	.	nearest_ref "XM_006496511.2"; exon_number "5"; gene_id "56812"; transcript_name "TCONS_00000257"; gene_biotype "protein_coding"; class_code "j"; transcript_id "TCONS_00000257"; gene_name "Dnajb2"; transcript_biotype "protein_coding"
NC_000067.7	Novogene	exon	75217536	75217628	.	+	.	nearest_ref "XM_006496511.2"; exon_number "6"; gene_id "56812"; transcript_name "TCONS_00000257"; gene_biotype "protein_coding"; class_code "j"; transcript_id "TCONS_00000257"; gene_name "Dnajb2"; transcript_biotype "protein_coding"
NC_000067.7	Novogene	exon	75217815	75217917	.	+	.	nearest_ref "XM_006496511.2"; exon_number "7"; gene_id "56812"; transcript_name "TCONS_00000257"; gene_biotype "protein_coding"; class_code "j"; transcript_id "TCONS_00000257"; gene_name "Dnajb2"; transcript_biotype "protein_coding"
NC_000067.7	Novogene	exon	75218053	75218123	.	+	.	nearest_ref "XM_006496511.2"; exon_number "8"; gene_id "56812"; transcript_name "TCONS_00000257"; gene_biotype "protein_coding"; class_code "j"; transcript_id "TCONS_00000257"; gene_name "Dnajb2"; transcript_biotype "protein_coding"
NC_000067.7	Novogene	exon	75220102	75220305	.	+	.	nearest_ref "XM_006496511.2"; exon_number "9"; gene_id "56812"; transcript_name "TCONS_00000257"; gene_biotype "protein_coding"; class_code "j"; transcript_id "TCONS_00000257"; gene_name "Dnajb2"; transcript_biotype "protein_coding"
NC_000067.7	Novogene	exon	75221438	75224264	.	+	.	nearest_ref "XM_006496511.2"; exon_number "10"; gene_id "56812"; transcript_name "TCONS_00000257"; gene_biotype "protein_coding"; class_code "j"; transcript_id "TCONS_00000257"; gene_name "Dnajb2"; transcript_biotype "protein_coding"
NC_000067.7	Novogene	exon	75224481	75225390	.	+	.	nearest_ref "XM_006496511.2"; exon_number "11"; gene_id "56812"; transcript_name "TCONS_00000257"; gene_biotype "protein_coding"; class_code "j"; transcript_id "TCONS_00000257"; gene_name "Dnajb2"; transcript_biotype "protein_coding"
NC_000067.7	Novogene	exon	75336261	75336430	.	+	.	nearest_ref "NM_010043.2"; exon_number "1"; gene_id "13346"; transcript_name "TCONS_00000259"; gene_biotype "protein_coding"; class_code "j"; transcript_id "TCONS_00000259"; gene_name "Des"; transcript_biotype "protein_coding"
NC_000067.7	Novogene	exon	75336999	75337636	.	+	.	nearest_ref "NM_010043.2"; exon_number "2"; gene_id "13346"; transcript_name "TCONS_00000259"; gene_biotype "protein_coding"; class_code "j"; transcript_id "TCONS_00000259"; gene_name "Des"; transcript_biotype "protein_coding"
NC_000067.7	Novogene	exon	75338802	75338862	.	+	.	nearest_ref "NM_010043.2"; exon_number "3"; gene_id "13346"; transcript_name "TCONS_00000259"; gene_biotype "protein_coding"; class_code "j"; transcript_id "TCONS_00000259"; gene_name "Des"; transcript_biotype "protein_coding"
NC_000067.7	Novogene	exon	75338957	75339052	.	+	.	nearest_ref "NM_010043.2"; exon_number "4"; gene_id "13346"; transcript_name "TCONS_00000259"; gene_biotype "protein_coding"; class_code "j"; transcript_id "TCONS_00000259"; gene_name "Des"; transcript_biotype "protein_coding"
NC_000067.7	Novogene	exon	75339209	75339370	.	+	.	nearest_ref "NM_010043.2"; exon_number "5"; gene_id "13346"; transcript_name "TCONS_00000259"; gene_biotype "protein_coding"; class_code "j"; transcript_id "TCONS_00000259"; gene_name "Des"; transcript_biotype "protein_coding"
NC_000067.7	Novogene	exon	75339538	75339663	.	+	.	nearest_ref "NM_010043.2"; exon_number "6"; gene_id "13346"; transcript_name "TCONS_00000259"; gene_biotype "protein_coding"; class_code "j"; transcript_id "TCONS_00000259"; gene_name "Des"; transcript_biotype "protein_coding"
NC_000067.7	Novogene	exon	75340115	75340335	.	+	.	nearest_ref "NM_010043.2"; exon_number "7"; gene_id "13346"; transcript_name "TCONS_00000259"; gene_biotype "protein_coding"; class_code "j"; transcript_id "TCONS_00000259"; gene_name "Des"; transcript_biotype "protein_coding"
NC_000067.7	Novogene	exon	75341972	75342015	.	+	.	nearest_ref "NM_010043.2"; exon_number "8"; gene_id "13346"; transcript_name "TCONS_00000259"; gene_biotype "protein_coding"; class_code "j"; transcript_id "TCONS_00000259"; gene_name "Des"; transcript_biotype "protein_coding"
NC_000067.7	Novogene	exon	75343404	75343486	.	+	.	nearest_ref "NM_010043.2"; exon_number "9"; gene_id "13346"; transcript_name "TCONS_00000259"; gene_biotype "protein_coding"; class_code "j"; transcript_id "TCONS_00000259"; gene_name "Des"; transcript_biotype "protein_coding"
NC_000067.7	Novogene	exon	75343653	75345223	.	+	.	nearest_ref "NM_010043.2"; exon_number "10"; gene_id "13346"; transcript_name "TCONS_00000259"; gene_biotype "protein_coding"; class_code "j"; transcript_id "TCONS_00000259"; gene_name "Des"; transcript_biotype "protein_coding"
NC_000067.7	Novogene	exon	75351983	75358818	.	+	.	nearest_ref "XM_011238645.3"; exon_number "1"; gene_id "11790"; transcript_name "TCONS_00000262"; gene_biotype "protein_coding"; class_code "j"; transcript_id "TCONS_00000262"; gene_name "Speg"; transcript_biotype "protein_coding"
NC_000067.7	Novogene	exon	75359781	75361389	.	+	.	nearest_ref "XM_011238645.3"; exon_number "2"; gene_id "11790"; transcript_name "TCONS_00000262"; gene_biotype "protein_coding"; class_code "j"; transcript_id "TCONS_00000262"; gene_name "Speg"; transcript_biotype "protein_coding"
NC_000067.7	Novogene	exon	75361472	75361808	.	+	.	nearest_ref "XM_011238645.3"; exon_number "3"; gene_id "11790"; transcript_name "TCONS_00000262"; gene_biotype "protein_coding"; class_code "j"; transcript_id "TCONS_00000262"; gene_name "Speg"; transcript_biotype "protein_coding"
NC_000067.7	Novogene	exon	75364445	75365748	.	+	.	nearest_ref "XM_011238645.3"; exon_number "4"; gene_id "11790"; transcript_name "TCONS_00000262"; gene_biotype "protein_coding"; class_code "j"; transcript_id "TCONS_00000262"; gene_name "Speg"; transcript_biotype "protein_coding"
NC_000067.7	Novogene	exon	75367623	75367766	.	+	.	nearest_ref "XM_011238645.3"; exon_number "5"; gene_id "11790"; transcript_name "TCONS_00000262"; gene_biotype "protein_coding"; class_code "j"; transcript_id "TCONS_00000262"; gene_name "Speg"; transcript_biotype "protein_coding"
NC_000067.7	Novogene	exon	75368406	75368588	.	+	.	nearest_ref "XM_011238645.3"; exon_number "6"; gene_id "11790"; transcript_name "TCONS_00000262"; gene_biotype "protein_coding"; class_code "j"; transcript_id "TCONS_00000262"; gene_name "Speg"; transcript_biotype "protein_coding"
NC_000067.7	Novogene	exon	75377699	75377874	.	+	.	nearest_ref "XM_011238645.3"; exon_number "7"; gene_id "11790"; transcript_name "TCONS_00000262"; gene_biotype "protein_coding"; class_code "j"; transcript_id "TCONS_00000262"; gene_name "Speg"; transcript_biotype "protein_coding"
NC_000067.7	Novogene	exon	75378107	75378195	.	+	.	nearest_ref "XM_011238645.3"; exon_number "8"; gene_id "11790"; transcript_name "TCONS_00000262"; gene_biotype "protein_coding"; class_code "j"; transcript_id "TCONS_00000262"; gene_name "Speg"; transcript_biotype "protein_coding"
NC_000067.7	Novogene	exon	75378942	75379117	.	+	.	nearest_ref "XM_011238645.3"; exon_number "9"; gene_id "11790"; transcript_name "TCONS_00000262"; gene_biotype "protein_coding"; class_code "j"; transcript_id "TCONS_00000262"; gene_name "Speg"; transcript_biotype "protein_coding"
NC_000067.7	Novogene	exon	75381531	75381791	.	+	.	nearest_ref "XM_011238645.3"; exon_number "10"; gene_id "11790"; transcript_name "TCONS_00000262"; gene_biotype "protein_coding"; class_code "j"; transcript_id "TCONS_00000262"; gene_name "Speg"; transcript_biotype "protein_coding"
NC_000067.7	Novogene	exon	75382950	75383108	.	+	.	nearest_ref "XM_011238645.3"; exon_number "11"; gene_id "11790"; transcript_name "TCONS_00000262"; gene_biotype "protein_coding"; class_code "j"; transcript_id "TCONS_00000262"; gene_name "Speg"; transcript_biotype "protein_coding"
NC_000067.7	Novogene	exon	75383223	75383412	.	+	.	nearest_ref "XM_011238645.3"; exon_number "12"; gene_id "11790"; transcript_name "TCONS_00000262"; gene_biotype "protein_coding"; class_code "j"; transcript_id "TCONS_00000262"; gene_name "Speg"; transcript_biotype "protein_coding"
NC_000067.7	Novogene	exon	75383520	75383743	.	+	.	nearest_ref "XM_011238645.3"; exon_number "13"; gene_id "11790"; transcript_name "TCONS_00000262"; gene_biotype "protein_coding"; class_code "j"; transcript_id "TCONS_00000262"; gene_name "Speg"; transcript_biotype "protein_coding"
NC_000067.7	Novogene	exon	75386598	75386717	.	+	.	nearest_ref "XM_011238645.3"; exon_number "14"; gene_id "11790"; transcript_name "TCONS_00000262"; gene_biotype "protein_coding"; class_code "j"; transcript_id "TCONS_00000262"; gene_name "Speg"; transcript_biotype "protein_coding"
NC_000067.7	Novogene	exon	75386933	75387037	.	+	.	nearest_ref "XM_011238645.3"; exon_number "15"; gene_id "11790"; transcript_name "TCONS_00000262"; gene_biotype "protein_coding"; class_code "j"; transcript_id "TCONS_00000262"; gene_name "Speg"; transcript_biotype "protein_coding"
NC_000067.7	Novogene	exon	75387201	75387407	.	+	.	nearest_ref "XM_011238645.3"; exon_number "16"; gene_id "11790"; transcript_name "TCONS_00000262"; gene_biotype "protein_coding"; class_code "j"; transcript_id "TCONS_00000262"; gene_name "Speg"; transcript_biotype "protein_coding"
NC_000067.7	Novogene	exon	75387723	75387846	.	+	.	nearest_ref "XM_011238645.3"; exon_number "17"; gene_id "11790"; transcript_name "TCONS_00000262"; gene_biotype "protein_coding"; class_code "j"; transcript_id "TCONS_00000262"; gene_name "Speg"; transcript_biotype "protein_coding"
NC_000067.7	Novogene	exon	75387930	75388105	.	+	.	nearest_ref "XM_011238645.3"; exon_number "18"; gene_id "11790"; transcript_name "TCONS_00000262"; gene_biotype "protein_coding"; class_code "j"; transcript_id "TCONS_00000262"; gene_name "Speg"; transcript_biotype "protein_coding"
NC_000067.7	Novogene	exon	75390960	75391072	.	+	.	nearest_ref "XM_011238645.3"; exon_number "19"; gene_id "11790"; transcript_name "TCONS_00000262"; gene_biotype "protein_coding"; class_code "j"; transcript_id "TCONS_00000262"; gene_name "Speg"; transcript_biotype "protein_coding"
NC_000067.7	Novogene	exon	75391644	75391812	.	+	.	nearest_ref "XM_011238645.3"; exon_number "20"; gene_id "11790"; transcript_name "TCONS_00000262"; gene_biotype "protein_coding"; class_code "j"; transcript_id "TCONS_00000262"; gene_name "Speg"; transcript_biotype "protein_coding"
NC_000067.7	Novogene	exon	75391964	75392060	.	+	.	nearest_ref "XM_011238645.3"; exon_number "21"; gene_id "11790"; transcript_name "TCONS_00000262"; gene_biotype "protein_coding"; class_code "j"; transcript_id "TCONS_00000262"; gene_name "Speg"; transcript_biotype "protein_coding"
NC_000067.7	Novogene	exon	75392186	75392386	.	+	.	nearest_ref "XM_011238645.3"; exon_number "22"; gene_id "11790"; transcript_name "TCONS_00000262"; gene_biotype "protein_coding"; class_code "j"; transcript_id "TCONS_00000262"; gene_name "Speg"; transcript_biotype "protein_coding"
NC_000067.7	Novogene	exon	75393687	75393744	.	+	.	nearest_ref "XM_011238645.3"; exon_number "23"; gene_id "11790"; transcript_name "TCONS_00000262"; gene_biotype "protein_coding"; class_code "j"; transcript_id "TCONS_00000262"; gene_name "Speg"; transcript_biotype "protein_coding"
NC_000067.7	Novogene	exon	75394307	75394384	.	+	.	nearest_ref "XM_011238645.3"; exon_number "24"; gene_id "11790"; transcript_name "TCONS_00000262"; gene_biotype "protein_coding"; class_code "j"; transcript_id "TCONS_00000262"; gene_name "Speg"; transcript_biotype "protein_coding"
NC_000067.7	Novogene	exon	75394471	75394649	.	+	.	nearest_ref "XM_011238645.3"; exon_number "25"; gene_id "11790"; transcript_name "TCONS_00000262"; gene_biotype "protein_coding"; class_code "j"; transcript_id "TCONS_00000262"; gene_name "Speg"; transcript_biotype "protein_coding"
NC_000067.7	Novogene	exon	75395075	75395101	.	+	.	nearest_ref "XM_011238645.3"; exon_number "26"; gene_id "11790"; transcript_name "TCONS_00000262"; gene_biotype "protein_coding"; class_code "j"; transcript_id "TCONS_00000262"; gene_name "Speg"; transcript_biotype "protein_coding"
NC_000067.7	Novogene	exon	75395615	75395767	.	+	.	nearest_ref "XM_011238645.3"; exon_number "27"; gene_id "11790"; transcript_name "TCONS_00000262"; gene_biotype "protein_coding"; class_code "j"; transcript_id "TCONS_00000262"; gene_name "Speg"; transcript_biotype "protein_coding"
NC_000067.7	Novogene	exon	75396873	75396912	.	+	.	nearest_ref "XM_011238645.3"; exon_number "28"; gene_id "11790"; transcript_name "TCONS_00000262"; gene_biotype "protein_coding"; class_code "j"; transcript_id "TCONS_00000262"; gene_name "Speg"; transcript_biotype "protein_coding"
NC_000067.7	Novogene	exon	75351983	75352477	.	+	.	nearest_ref "XM_011238645.3"; exon_number "1"; gene_id "11790"; transcript_name "TCONS_00000265"; gene_biotype "protein_coding"; class_code "j"; transcript_id "TCONS_00000265"; gene_name "Speg"; transcript_biotype "protein_coding"
NC_000067.7	Novogene	exon	75361300	75361389	.	+	.	nearest_ref "XM_011238645.3"; exon_number "2"; gene_id "11790"; transcript_name "TCONS_00000265"; gene_biotype "protein_coding"; class_code "j"; transcript_id "TCONS_00000265"; gene_name "Speg"; transcript_biotype "protein_coding"
NC_000067.7	Novogene	exon	75361472	75361631	.	+	.	nearest_ref "XM_011238645.3"; exon_number "3"; gene_id "11790"; transcript_name "TCONS_00000265"; gene_biotype "protein_coding"; class_code "j"; transcript_id "TCONS_00000265"; gene_name "Speg"; transcript_biotype "protein_coding"
NC_000067.7	Novogene	exon	75364442	75365748	.	+	.	nearest_ref "XM_011238645.3"; exon_number "4"; gene_id "11790"; transcript_name "TCONS_00000265"; gene_biotype "protein_coding"; class_code "j"; transcript_id "TCONS_00000265"; gene_name "Speg"; transcript_biotype "protein_coding"
NC_000067.7	Novogene	exon	75367623	75367766	.	+	.	nearest_ref "XM_011238645.3"; exon_number "5"; gene_id "11790"; transcript_name "TCONS_00000265"; gene_biotype "protein_coding"; class_code "j"; transcript_id "TCONS_00000265"; gene_name "Speg"; transcript_biotype "protein_coding"
NC_000067.7	Novogene	exon	75368406	75368588	.	+	.	nearest_ref "XM_011238645.3"; exon_number "6"; gene_id "11790"; transcript_name "TCONS_00000265"; gene_biotype "protein_coding"; class_code "j"; transcript_id "TCONS_00000265"; gene_name "Speg"; transcript_biotype "protein_coding"
NC_000067.7	Novogene	exon	75377699	75377874	.	+	.	nearest_ref "XM_011238645.3"; exon_number "7"; gene_id "11790"; transcript_name "TCONS_00000265"; gene_biotype "protein_coding"; class_code "j"; transcript_id "TCONS_00000265"; gene_name "Speg"; transcript_biotype "protein_coding"
NC_000067.7	Novogene	exon	75378107	75378195	.	+	.	nearest_ref "XM_011238645.3"; exon_number "8"; gene_id "11790"; transcript_name "TCONS_00000265"; gene_biotype "protein_coding"; class_code "j"; transcript_id "TCONS_00000265"; gene_name "Speg"; transcript_biotype "protein_coding"
NC_000067.7	Novogene	exon	75378942	75379117	.	+	.	nearest_ref "XM_011238645.3"; exon_number "9"; gene_id "11790"; transcript_name "TCONS_00000265"; gene_biotype "protein_coding"; class_code "j"; transcript_id "TCONS_00000265"; gene_name "Speg"; transcript_biotype "protein_coding"
NC_000067.7	Novogene	exon	75381531	75381791	.	+	.	nearest_ref "XM_011238645.3"; exon_number "10"; gene_id "11790"; transcript_name "TCONS_00000265"; gene_biotype "protein_coding"; class_code "j"; transcript_id "TCONS_00000265"; gene_name "Speg"; transcript_biotype "protein_coding"
NC_000067.7	Novogene	exon	75382950	75383108	.	+	.	nearest_ref "XM_011238645.3"; exon_number "11"; gene_id "11790"; transcript_name "TCONS_00000265"; gene_biotype "protein_coding"; class_code "j"; transcript_id "TCONS_00000265"; gene_name "Speg"; transcript_biotype "protein_coding"
NC_000067.7	Novogene	exon	75383223	75383412	.	+	.	nearest_ref "XM_011238645.3"; exon_number "12"; gene_id "11790"; transcript_name "TCONS_00000265"; gene_biotype "protein_coding"; class_code "j"; transcript_id "TCONS_00000265"; gene_name "Speg"; transcript_biotype "protein_coding"
NC_000067.7	Novogene	exon	75383520	75383743	.	+	.	nearest_ref "XM_011238645.3"; exon_number "13"; gene_id "11790"; transcript_name "TCONS_00000265"; gene_biotype "protein_coding"; class_code "j"; transcript_id "TCONS_00000265"; gene_name "Speg"; transcript_biotype "protein_coding"
NC_000067.7	Novogene	exon	75386598	75386717	.	+	.	nearest_ref "XM_011238645.3"; exon_number "14"; gene_id "11790"; transcript_name "TCONS_00000265"; gene_biotype "protein_coding"; class_code "j"; transcript_id "TCONS_00000265"; gene_name "Speg"; transcript_biotype "protein_coding"
NC_000067.7	Novogene	exon	75386933	75387037	.	+	.	nearest_ref "XM_011238645.3"; exon_number "15"; gene_id "11790"; transcript_name "TCONS_00000265"; gene_biotype "protein_coding"; class_code "j"; transcript_id "TCONS_00000265"; gene_name "Speg"; transcript_biotype "protein_coding"
NC_000067.7	Novogene	exon	75387201	75387407	.	+	.	nearest_ref "XM_011238645.3"; exon_number "16"; gene_id "11790"; transcript_name "TCONS_00000265"; gene_biotype "protein_coding"; class_code "j"; transcript_id "TCONS_00000265"; gene_name "Speg"; transcript_biotype "protein_coding"
NC_000067.7	Novogene	exon	75387723	75387846	.	+	.	nearest_ref "XM_011238645.3"; exon_number "17"; gene_id "11790"; transcript_name "TCONS_00000265"; gene_biotype "protein_coding"; class_code "j"; transcript_id "TCONS_00000265"; gene_name "Speg"; transcript_biotype "protein_coding"
NC_000067.7	Novogene	exon	75387930	75388105	.	+	.	nearest_ref "XM_011238645.3"; exon_number "18"; gene_id "11790"; transcript_name "TCONS_00000265"; gene_biotype "protein_coding"; class_code "j"; transcript_id "TCONS_00000265"; gene_name "Speg"; transcript_biotype "protein_coding"
NC_000067.7	Novogene	exon	75390960	75391072	.	+	.	nearest_ref "XM_011238645.3"; exon_number "19"; gene_id "11790"; transcript_name "TCONS_00000265"; gene_biotype "protein_coding"; class_code "j"; transcript_id "TCONS_00000265"; gene_name "Speg"; transcript_biotype "protein_coding"
NC_000067.7	Novogene	exon	75391644	75391812	.	+	.	nearest_ref "XM_011238645.3"; exon_number "20"; gene_id "11790"; transcript_name "TCONS_00000265"; gene_biotype "protein_coding"; class_code "j"; transcript_id "TCONS_00000265"; gene_name "Speg"; transcript_biotype "protein_coding"
NC_000067.7	Novogene	exon	75391964	75392060	.	+	.	nearest_ref "XM_011238645.3"; exon_number "21"; gene_id "11790"; transcript_name "TCONS_00000265"; gene_biotype "protein_coding"; class_code "j"; transcript_id "TCONS_00000265"; gene_name "Speg"; transcript_biotype "protein_coding"
NC_000067.7	Novogene	exon	75392186	75392386	.	+	.	nearest_ref "XM_011238645.3"; exon_number "22"; gene_id "11790"; transcript_name "TCONS_00000265"; gene_biotype "protein_coding"; class_code "j"; transcript_id "TCONS_00000265"; gene_name "Speg"; transcript_biotype "protein_coding"
NC_000067.7	Novogene	exon	75393687	75393744	.	+	.	nearest_ref "XM_011238645.3"; exon_number "23"; gene_id "11790"; transcript_name "TCONS_00000265"; gene_biotype "protein_coding"; class_code "j"; transcript_id "TCONS_00000265"; gene_name "Speg"; transcript_biotype "protein_coding"
NC_000067.7	Novogene	exon	75394307	75394384	.	+	.	nearest_ref "XM_011238645.3"; exon_number "24"; gene_id "11790"; transcript_name "TCONS_00000265"; gene_biotype "protein_coding"; class_code "j"; transcript_id "TCONS_00000265"; gene_name "Speg"; transcript_biotype "protein_coding"
NC_000067.7	Novogene	exon	75394471	75394649	.	+	.	nearest_ref "XM_011238645.3"; exon_number "25"; gene_id "11790"; transcript_name "TCONS_00000265"; gene_biotype "protein_coding"; class_code "j"; transcript_id "TCONS_00000265"; gene_name "Speg"; transcript_biotype "protein_coding"
NC_000067.7	Novogene	exon	75395075	75395101	.	+	.	nearest_ref "XM_011238645.3"; exon_number "26"; gene_id "11790"; transcript_name "TCONS_00000265"; gene_biotype "protein_coding"; class_code "j"; transcript_id "TCONS_00000265"; gene_name "Speg"; transcript_biotype "protein_coding"
NC_000067.7	Novogene	exon	75395615	75395767	.	+	.	nearest_ref "XM_011238645.3"; exon_number "27"; gene_id "11790"; transcript_name "TCONS_00000265"; gene_biotype "protein_coding"; class_code "j"; transcript_id "TCONS_00000265"; gene_name "Speg"; transcript_biotype "protein_coding"
NC_000067.7	Novogene	exon	75396873	75396915	.	+	.	nearest_ref "XM_011238645.3"; exon_number "28"; gene_id "11790"; transcript_name "TCONS_00000265"; gene_biotype "protein_coding"; class_code "j"; transcript_id "TCONS_00000265"; gene_name "Speg"; transcript_biotype "protein_coding"
NC_000067.7	Novogene	exon	75397935	75398003	.	+	.	nearest_ref "XM_011238645.3"; exon_number "29"; gene_id "11790"; transcript_name "TCONS_00000265"; gene_biotype "protein_coding"; class_code "j"; transcript_id "TCONS_00000265"; gene_name "Speg"; transcript_biotype "protein_coding"
NC_000067.7	Novogene	exon	75398204	75400172	.	+	.	nearest_ref "XM_011238645.3"; exon_number "30"; gene_id "11790"; transcript_name "TCONS_00000265"; gene_biotype "protein_coding"; class_code "j"; transcript_id "TCONS_00000265"; gene_name "Speg"; transcript_biotype "protein_coding"
NC_000067.7	Novogene	exon	75400460	75403524	.	+	.	nearest_ref "XM_011238645.3"; exon_number "31"; gene_id "11790"; transcript_name "TCONS_00000265"; gene_biotype "protein_coding"; class_code "j"; transcript_id "TCONS_00000265"; gene_name "Speg"; transcript_biotype "protein_coding"
NC_000067.7	Novogene	exon	75403688	75403855	.	+	.	nearest_ref "XM_011238645.3"; exon_number "32"; gene_id "11790"; transcript_name "TCONS_00000265"; gene_biotype "protein_coding"; class_code "j"; transcript_id "TCONS_00000265"; gene_name "Speg"; transcript_biotype "protein_coding"
NC_000067.7	Novogene	exon	75403958	75404080	.	+	.	nearest_ref "XM_011238645.3"; exon_number "33"; gene_id "11790"; transcript_name "TCONS_00000265"; gene_biotype "protein_coding"; class_code "j"; transcript_id "TCONS_00000265"; gene_name "Speg"; transcript_biotype "protein_coding"
NC_000067.7	Novogene	exon	75404255	75404422	.	+	.	nearest_ref "XM_011238645.3"; exon_number "34"; gene_id "11790"; transcript_name "TCONS_00000265"; gene_biotype "protein_coding"; class_code "j"; transcript_id "TCONS_00000265"; gene_name "Speg"; transcript_biotype "protein_coding"
NC_000067.7	Novogene	exon	75404536	75405115	.	+	.	nearest_ref "XM_011238645.3"; exon_number "35"; gene_id "11790"; transcript_name "TCONS_00000265"; gene_biotype "protein_coding"; class_code "j"; transcript_id "TCONS_00000265"; gene_name "Speg"; transcript_biotype "protein_coding"
NC_000067.7	Novogene	exon	75405704	75405943	.	+	.	nearest_ref "XM_011238645.3"; exon_number "36"; gene_id "11790"; transcript_name "TCONS_00000265"; gene_biotype "protein_coding"; class_code "j"; transcript_id "TCONS_00000265"; gene_name "Speg"; transcript_biotype "protein_coding"
NC_000067.7	Novogene	exon	75406041	75406264	.	+	.	nearest_ref "XM_011238645.3"; exon_number "37"; gene_id "11790"; transcript_name "TCONS_00000265"; gene_biotype "protein_coding"; class_code "j"; transcript_id "TCONS_00000265"; gene_name "Speg"; transcript_biotype "protein_coding"
NC_000067.7	Novogene	exon	75407083	75407158	.	+	.	nearest_ref "XM_011238645.3"; exon_number "38"; gene_id "11790"; transcript_name "TCONS_00000265"; gene_biotype "protein_coding"; class_code "j"; transcript_id "TCONS_00000265"; gene_name "Speg"; transcript_biotype "protein_coding"
NC_000067.7	Novogene	exon	75407441	75407590	.	+	.	nearest_ref "XM_011238645.3"; exon_number "39"; gene_id "11790"; transcript_name "TCONS_00000265"; gene_biotype "protein_coding"; class_code "j"; transcript_id "TCONS_00000265"; gene_name "Speg"; transcript_biotype "protein_coding"
NC_000067.7	Novogene	exon	75407903	75408912	.	+	.	nearest_ref "XM_011238645.3"; exon_number "40"; gene_id "11790"; transcript_name "TCONS_00000265"; gene_biotype "protein_coding"; class_code "j"; transcript_id "TCONS_00000265"; gene_name "Speg"; transcript_biotype "protein_coding"
NC_000067.7	Novogene	exon	75351983	75358717	.	+	.	nearest_ref "XM_011238645.3"; exon_number "1"; gene_id "11790"; transcript_name "TCONS_00000266"; gene_biotype "protein_coding"; class_code "j"; transcript_id "TCONS_00000266"; gene_name "Speg"; transcript_biotype "protein_coding"
NC_000067.7	Novogene	exon	75358764	75358818	.	+	.	nearest_ref "XM_011238645.3"; exon_number "2"; gene_id "11790"; transcript_name "TCONS_00000266"; gene_biotype "protein_coding"; class_code "j"; transcript_id "TCONS_00000266"; gene_name "Speg"; transcript_biotype "protein_coding"
NC_000067.7	Novogene	exon	75359781	75361389	.	+	.	nearest_ref "XM_011238645.3"; exon_number "3"; gene_id "11790"; transcript_name "TCONS_00000266"; gene_biotype "protein_coding"; class_code "j"; transcript_id "TCONS_00000266"; gene_name "Speg"; transcript_biotype "protein_coding"
NC_000067.7	Novogene	exon	75361472	75365748	.	+	.	nearest_ref "XM_011238645.3"; exon_number "4"; gene_id "11790"; transcript_name "TCONS_00000266"; gene_biotype "protein_coding"; class_code "j"; transcript_id "TCONS_00000266"; gene_name "Speg"; transcript_biotype "protein_coding"
NC_000067.7	Novogene	exon	75367623	75367766	.	+	.	nearest_ref "XM_011238645.3"; exon_number "5"; gene_id "11790"; transcript_name "TCONS_00000266"; gene_biotype "protein_coding"; class_code "j"; transcript_id "TCONS_00000266"; gene_name "Speg"; transcript_biotype "protein_coding"
NC_000067.7	Novogene	exon	75368406	75368588	.	+	.	nearest_ref "XM_011238645.3"; exon_number "6"; gene_id "11790"; transcript_name "TCONS_00000266"; gene_biotype "protein_coding"; class_code "j"; transcript_id "TCONS_00000266"; gene_name "Speg"; transcript_biotype "protein_coding"
NC_000067.7	Novogene	exon	75377699	75377874	.	+	.	nearest_ref "XM_011238645.3"; exon_number "7"; gene_id "11790"; transcript_name "TCONS_00000266"; gene_biotype "protein_coding"; class_code "j"; transcript_id "TCONS_00000266"; gene_name "Speg"; transcript_biotype "protein_coding"
NC_000067.7	Novogene	exon	75378107	75378195	.	+	.	nearest_ref "XM_011238645.3"; exon_number "8"; gene_id "11790"; transcript_name "TCONS_00000266"; gene_biotype "protein_coding"; class_code "j"; transcript_id "TCONS_00000266"; gene_name "Speg"; transcript_biotype "protein_coding"
NC_000067.7	Novogene	exon	75378942	75379117	.	+	.	nearest_ref "XM_011238645.3"; exon_number "9"; gene_id "11790"; transcript_name "TCONS_00000266"; gene_biotype "protein_coding"; class_code "j"; transcript_id "TCONS_00000266"; gene_name "Speg"; transcript_biotype "protein_coding"
NC_000067.7	Novogene	exon	75381531	75381791	.	+	.	nearest_ref "XM_011238645.3"; exon_number "10"; gene_id "11790"; transcript_name "TCONS_00000266"; gene_biotype "protein_coding"; class_code "j"; transcript_id "TCONS_00000266"; gene_name "Speg"; transcript_biotype "protein_coding"
NC_000067.7	Novogene	exon	75382950	75383108	.	+	.	nearest_ref "XM_011238645.3"; exon_number "11"; gene_id "11790"; transcript_name "TCONS_00000266"; gene_biotype "protein_coding"; class_code "j"; transcript_id "TCONS_00000266"; gene_name "Speg"; transcript_biotype "protein_coding"
NC_000067.7	Novogene	exon	75383223	75383412	.	+	.	nearest_ref "XM_011238645.3"; exon_number "12"; gene_id "11790"; transcript_name "TCONS_00000266"; gene_biotype "protein_coding"; class_code "j"; transcript_id "TCONS_00000266"; gene_name "Speg"; transcript_biotype "protein_coding"
NC_000067.7	Novogene	exon	75383520	75383743	.	+	.	nearest_ref "XM_011238645.3"; exon_number "13"; gene_id "11790"; transcript_name "TCONS_00000266"; gene_biotype "protein_coding"; class_code "j"; transcript_id "TCONS_00000266"; gene_name "Speg"; transcript_biotype "protein_coding"
NC_000067.7	Novogene	exon	75386598	75386717	.	+	.	nearest_ref "XM_011238645.3"; exon_number "14"; gene_id "11790"; transcript_name "TCONS_00000266"; gene_biotype "protein_coding"; class_code "j"; transcript_id "TCONS_00000266"; gene_name "Speg"; transcript_biotype "protein_coding"
NC_000067.7	Novogene	exon	75386933	75387037	.	+	.	nearest_ref "XM_011238645.3"; exon_number "15"; gene_id "11790"; transcript_name "TCONS_00000266"; gene_biotype "protein_coding"; class_code "j"; transcript_id "TCONS_00000266"; gene_name "Speg"; transcript_biotype "protein_coding"
NC_000067.7	Novogene	exon	75387201	75387407	.	+	.	nearest_ref "XM_011238645.3"; exon_number "16"; gene_id "11790"; transcript_name "TCONS_00000266"; gene_biotype "protein_coding"; class_code "j"; transcript_id "TCONS_00000266"; gene_name "Speg"; transcript_biotype "protein_coding"
NC_000067.7	Novogene	exon	75387723	75387846	.	+	.	nearest_ref "XM_011238645.3"; exon_number "17"; gene_id "11790"; transcript_name "TCONS_00000266"; gene_biotype "protein_coding"; class_code "j"; transcript_id "TCONS_00000266"; gene_name "Speg"; transcript_biotype "protein_coding"
NC_000067.7	Novogene	exon	75387930	75388105	.	+	.	nearest_ref "XM_011238645.3"; exon_number "18"; gene_id "11790"; transcript_name "TCONS_00000266"; gene_biotype "protein_coding"; class_code "j"; transcript_id "TCONS_00000266"; gene_name "Speg"; transcript_biotype "protein_coding"
NC_000067.7	Novogene	exon	75390960	75391072	.	+	.	nearest_ref "XM_011238645.3"; exon_number "19"; gene_id "11790"; transcript_name "TCONS_00000266"; gene_biotype "protein_coding"; class_code "j"; transcript_id "TCONS_00000266"; gene_name "Speg"; transcript_biotype "protein_coding"
NC_000067.7	Novogene	exon	75391644	75391812	.	+	.	nearest_ref "XM_011238645.3"; exon_number "20"; gene_id "11790"; transcript_name "TCONS_00000266"; gene_biotype "protein_coding"; class_code "j"; transcript_id "TCONS_00000266"; gene_name "Speg"; transcript_biotype "protein_coding"
NC_000067.7	Novogene	exon	75391964	75392060	.	+	.	nearest_ref "XM_011238645.3"; exon_number "21"; gene_id "11790"; transcript_name "TCONS_00000266"; gene_biotype "protein_coding"; class_code "j"; transcript_id "TCONS_00000266"; gene_name "Speg"; transcript_biotype "protein_coding"
NC_000067.7	Novogene	exon	75392186	75392386	.	+	.	nearest_ref "XM_011238645.3"; exon_number "22"; gene_id "11790"; transcript_name "TCONS_00000266"; gene_biotype "protein_coding"; class_code "j"; transcript_id "TCONS_00000266"; gene_name "Speg"; transcript_biotype "protein_coding"
NC_000067.7	Novogene	exon	75393687	75393744	.	+	.	nearest_ref "XM_011238645.3"; exon_number "23"; gene_id "11790"; transcript_name "TCONS_00000266"; gene_biotype "protein_coding"; class_code "j"; transcript_id "TCONS_00000266"; gene_name "Speg"; transcript_biotype "protein_coding"
NC_000067.7	Novogene	exon	75394307	75394384	.	+	.	nearest_ref "XM_011238645.3"; exon_number "24"; gene_id "11790"; transcript_name "TCONS_00000266"; gene_biotype "protein_coding"; class_code "j"; transcript_id "TCONS_00000266"; gene_name "Speg"; transcript_biotype "protein_coding"
NC_000067.7	Novogene	exon	75394471	75394649	.	+	.	nearest_ref "XM_011238645.3"; exon_number "25"; gene_id "11790"; transcript_name "TCONS_00000266"; gene_biotype "protein_coding"; class_code "j"; transcript_id "TCONS_00000266"; gene_name "Speg"; transcript_biotype "protein_coding"
NC_000067.7	Novogene	exon	75395075	75395101	.	+	.	nearest_ref "XM_011238645.3"; exon_number "26"; gene_id "11790"; transcript_name "TCONS_00000266"; gene_biotype "protein_coding"; class_code "j"; transcript_id "TCONS_00000266"; gene_name "Speg"; transcript_biotype "protein_coding"
NC_000067.7	Novogene	exon	75395615	75395767	.	+	.	nearest_ref "XM_011238645.3"; exon_number "27"; gene_id "11790"; transcript_name "TCONS_00000266"; gene_biotype "protein_coding"; class_code "j"; transcript_id "TCONS_00000266"; gene_name "Speg"; transcript_biotype "protein_coding"
NC_000067.7	Novogene	exon	75396873	75396915	.	+	.	nearest_ref "XM_011238645.3"; exon_number "28"; gene_id "11790"; transcript_name "TCONS_00000266"; gene_biotype "protein_coding"; class_code "j"; transcript_id "TCONS_00000266"; gene_name "Speg"; transcript_biotype "protein_coding"
NC_000067.7	Novogene	exon	75397935	75398003	.	+	.	nearest_ref "XM_011238645.3"; exon_number "29"; gene_id "11790"; transcript_name "TCONS_00000266"; gene_biotype "protein_coding"; class_code "j"; transcript_id "TCONS_00000266"; gene_name "Speg"; transcript_biotype "protein_coding"
NC_000067.7	Novogene	exon	75398204	75400172	.	+	.	nearest_ref "XM_011238645.3"; exon_number "30"; gene_id "11790"; transcript_name "TCONS_00000266"; gene_biotype "protein_coding"; class_code "j"; transcript_id "TCONS_00000266"; gene_name "Speg"; transcript_biotype "protein_coding"
NC_000067.7	Novogene	exon	75400460	75400591	.	+	.	nearest_ref "XM_011238645.3"; exon_number "31"; gene_id "11790"; transcript_name "TCONS_00000266"; gene_biotype "protein_coding"; class_code "j"; transcript_id "TCONS_00000266"; gene_name "Speg"; transcript_biotype "protein_coding"
NC_000067.7	Novogene	exon	75403408	75403524	.	+	.	nearest_ref "XM_011238645.3"; exon_number "32"; gene_id "11790"; transcript_name "TCONS_00000266"; gene_biotype "protein_coding"; class_code "j"; transcript_id "TCONS_00000266"; gene_name "Speg"; transcript_biotype "protein_coding"
NC_000067.7	Novogene	exon	75403688	75403855	.	+	.	nearest_ref "XM_011238645.3"; exon_number "33"; gene_id "11790"; transcript_name "TCONS_00000266"; gene_biotype "protein_coding"; class_code "j"; transcript_id "TCONS_00000266"; gene_name "Speg"; transcript_biotype "protein_coding"
NC_000067.7	Novogene	exon	75403958	75404080	.	+	.	nearest_ref "XM_011238645.3"; exon_number "34"; gene_id "11790"; transcript_name "TCONS_00000266"; gene_biotype "protein_coding"; class_code "j"; transcript_id "TCONS_00000266"; gene_name "Speg"; transcript_biotype "protein_coding"
NC_000067.7	Novogene	exon	75404255	75404422	.	+	.	nearest_ref "XM_011238645.3"; exon_number "35"; gene_id "11790"; transcript_name "TCONS_00000266"; gene_biotype "protein_coding"; class_code "j"; transcript_id "TCONS_00000266"; gene_name "Speg"; transcript_biotype "protein_coding"
NC_000067.7	Novogene	exon	75404536	75405115	.	+	.	nearest_ref "XM_011238645.3"; exon_number "36"; gene_id "11790"; transcript_name "TCONS_00000266"; gene_biotype "protein_coding"; class_code "j"; transcript_id "TCONS_00000266"; gene_name "Speg"; transcript_biotype "protein_coding"
NC_000067.7	Novogene	exon	75405704	75405943	.	+	.	nearest_ref "XM_011238645.3"; exon_number "37"; gene_id "11790"; transcript_name "TCONS_00000266"; gene_biotype "protein_coding"; class_code "j"; transcript_id "TCONS_00000266"; gene_name "Speg"; transcript_biotype "protein_coding"
NC_000067.7	Novogene	exon	75406041	75406264	.	+	.	nearest_ref "XM_011238645.3"; exon_number "38"; gene_id "11790"; transcript_name "TCONS_00000266"; gene_biotype "protein_coding"; class_code "j"; transcript_id "TCONS_00000266"; gene_name "Speg"; transcript_biotype "protein_coding"
NC_000067.7	Novogene	exon	75407083	75407158	.	+	.	nearest_ref "XM_011238645.3"; exon_number "39"; gene_id "11790"; transcript_name "TCONS_00000266"; gene_biotype "protein_coding"; class_code "j"; transcript_id "TCONS_00000266"; gene_name "Speg"; transcript_biotype "protein_coding"
NC_000067.7	Novogene	exon	75407441	75407590	.	+	.	nearest_ref "XM_011238645.3"; exon_number "40"; gene_id "11790"; transcript_name "TCONS_00000266"; gene_biotype "protein_coding"; class_code "j"; transcript_id "TCONS_00000266"; gene_name "Speg"; transcript_biotype "protein_coding"
NC_000067.7	Novogene	exon	75407903	75408912	.	+	.	nearest_ref "XM_011238645.3"; exon_number "41"; gene_id "11790"; transcript_name "TCONS_00000266"; gene_biotype "protein_coding"; class_code "j"; transcript_id "TCONS_00000266"; gene_name "Speg"; transcript_biotype "protein_coding"
NC_000067.7	Novogene	exon	75351983	75358818	.	+	.	nearest_ref "XM_011238645.3"; exon_number "1"; gene_id "11790"; transcript_name "TCONS_00000264"; gene_biotype "protein_coding"; class_code "j"; transcript_id "TCONS_00000264"; gene_name "Speg"; transcript_biotype "protein_coding"
NC_000067.7	Novogene	exon	75359781	75361389	.	+	.	nearest_ref "XM_011238645.3"; exon_number "2"; gene_id "11790"; transcript_name "TCONS_00000264"; gene_biotype "protein_coding"; class_code "j"; transcript_id "TCONS_00000264"; gene_name "Speg"; transcript_biotype "protein_coding"
NC_000067.7	Novogene	exon	75361472	75361808	.	+	.	nearest_ref "XM_011238645.3"; exon_number "3"; gene_id "11790"; transcript_name "TCONS_00000264"; gene_biotype "protein_coding"; class_code "j"; transcript_id "TCONS_00000264"; gene_name "Speg"; transcript_biotype "protein_coding"
NC_000067.7	Novogene	exon	75364442	75365748	.	+	.	nearest_ref "XM_011238645.3"; exon_number "4"; gene_id "11790"; transcript_name "TCONS_00000264"; gene_biotype "protein_coding"; class_code "j"; transcript_id "TCONS_00000264"; gene_name "Speg"; transcript_biotype "protein_coding"
NC_000067.7	Novogene	exon	75367623	75367766	.	+	.	nearest_ref "XM_011238645.3"; exon_number "5"; gene_id "11790"; transcript_name "TCONS_00000264"; gene_biotype "protein_coding"; class_code "j"; transcript_id "TCONS_00000264"; gene_name "Speg"; transcript_biotype "protein_coding"
NC_000067.7	Novogene	exon	75368406	75368588	.	+	.	nearest_ref "XM_011238645.3"; exon_number "6"; gene_id "11790"; transcript_name "TCONS_00000264"; gene_biotype "protein_coding"; class_code "j"; transcript_id "TCONS_00000264"; gene_name "Speg"; transcript_biotype "protein_coding"
NC_000067.7	Novogene	exon	75377699	75377874	.	+	.	nearest_ref "XM_011238645.3"; exon_number "7"; gene_id "11790"; transcript_name "TCONS_00000264"; gene_biotype "protein_coding"; class_code "j"; transcript_id "TCONS_00000264"; gene_name "Speg"; transcript_biotype "protein_coding"
NC_000067.7	Novogene	exon	75378107	75378195	.	+	.	nearest_ref "XM_011238645.3"; exon_number "8"; gene_id "11790"; transcript_name "TCONS_00000264"; gene_biotype "protein_coding"; class_code "j"; transcript_id "TCONS_00000264"; gene_name "Speg"; transcript_biotype "protein_coding"
NC_000067.7	Novogene	exon	75378942	75379117	.	+	.	nearest_ref "XM_011238645.3"; exon_number "9"; gene_id "11790"; transcript_name "TCONS_00000264"; gene_biotype "protein_coding"; class_code "j"; transcript_id "TCONS_00000264"; gene_name "Speg"; transcript_biotype "protein_coding"
NC_000067.7	Novogene	exon	75381531	75381791	.	+	.	nearest_ref "XM_011238645.3"; exon_number "10"; gene_id "11790"; transcript_name "TCONS_00000264"; gene_biotype "protein_coding"; class_code "j"; transcript_id "TCONS_00000264"; gene_name "Speg"; transcript_biotype "protein_coding"
NC_000067.7	Novogene	exon	75382950	75383108	.	+	.	nearest_ref "XM_011238645.3"; exon_number "11"; gene_id "11790"; transcript_name "TCONS_00000264"; gene_biotype "protein_coding"; class_code "j"; transcript_id "TCONS_00000264"; gene_name "Speg"; transcript_biotype "protein_coding"
NC_000067.7	Novogene	exon	75383223	75383412	.	+	.	nearest_ref "XM_011238645.3"; exon_number "12"; gene_id "11790"; transcript_name "TCONS_00000264"; gene_biotype "protein_coding"; class_code "j"; transcript_id "TCONS_00000264"; gene_name "Speg"; transcript_biotype "protein_coding"
NC_000067.7	Novogene	exon	75383520	75383743	.	+	.	nearest_ref "XM_011238645.3"; exon_number "13"; gene_id "11790"; transcript_name "TCONS_00000264"; gene_biotype "protein_coding"; class_code "j"; transcript_id "TCONS_00000264"; gene_name "Speg"; transcript_biotype "protein_coding"
NC_000067.7	Novogene	exon	75386598	75386717	.	+	.	nearest_ref "XM_011238645.3"; exon_number "14"; gene_id "11790"; transcript_name "TCONS_00000264"; gene_biotype "protein_coding"; class_code "j"; transcript_id "TCONS_00000264"; gene_name "Speg"; transcript_biotype "protein_coding"
NC_000067.7	Novogene	exon	75386933	75387037	.	+	.	nearest_ref "XM_011238645.3"; exon_number "15"; gene_id "11790"; transcript_name "TCONS_00000264"; gene_biotype "protein_coding"; class_code "j"; transcript_id "TCONS_00000264"; gene_name "Speg"; transcript_biotype "protein_coding"
NC_000067.7	Novogene	exon	75387201	75387407	.	+	.	nearest_ref "XM_011238645.3"; exon_number "16"; gene_id "11790"; transcript_name "TCONS_00000264"; gene_biotype "protein_coding"; class_code "j"; transcript_id "TCONS_00000264"; gene_name "Speg"; transcript_biotype "protein_coding"
NC_000067.7	Novogene	exon	75387723	75387846	.	+	.	nearest_ref "XM_011238645.3"; exon_number "17"; gene_id "11790"; transcript_name "TCONS_00000264"; gene_biotype "protein_coding"; class_code "j"; transcript_id "TCONS_00000264"; gene_name "Speg"; transcript_biotype "protein_coding"
NC_000067.7	Novogene	exon	75387930	75388105	.	+	.	nearest_ref "XM_011238645.3"; exon_number "18"; gene_id "11790"; transcript_name "TCONS_00000264"; gene_biotype "protein_coding"; class_code "j"; transcript_id "TCONS_00000264"; gene_name "Speg"; transcript_biotype "protein_coding"
NC_000067.7	Novogene	exon	75390960	75391072	.	+	.	nearest_ref "XM_011238645.3"; exon_number "19"; gene_id "11790"; transcript_name "TCONS_00000264"; gene_biotype "protein_coding"; class_code "j"; transcript_id "TCONS_00000264"; gene_name "Speg"; transcript_biotype "protein_coding"
NC_000067.7	Novogene	exon	75391644	75391812	.	+	.	nearest_ref "XM_011238645.3"; exon_number "20"; gene_id "11790"; transcript_name "TCONS_00000264"; gene_biotype "protein_coding"; class_code "j"; transcript_id "TCONS_00000264"; gene_name "Speg"; transcript_biotype "protein_coding"
NC_000067.7	Novogene	exon	75391964	75392060	.	+	.	nearest_ref "XM_011238645.3"; exon_number "21"; gene_id "11790"; transcript_name "TCONS_00000264"; gene_biotype "protein_coding"; class_code "j"; transcript_id "TCONS_00000264"; gene_name "Speg"; transcript_biotype "protein_coding"
NC_000067.7	Novogene	exon	75392186	75392386	.	+	.	nearest_ref "XM_011238645.3"; exon_number "22"; gene_id "11790"; transcript_name "TCONS_00000264"; gene_biotype "protein_coding"; class_code "j"; transcript_id "TCONS_00000264"; gene_name "Speg"; transcript_biotype "protein_coding"
NC_000067.7	Novogene	exon	75393687	75393744	.	+	.	nearest_ref "XM_011238645.3"; exon_number "23"; gene_id "11790"; transcript_name "TCONS_00000264"; gene_biotype "protein_coding"; class_code "j"; transcript_id "TCONS_00000264"; gene_name "Speg"; transcript_biotype "protein_coding"
NC_000067.7	Novogene	exon	75394307	75394384	.	+	.	nearest_ref "XM_011238645.3"; exon_number "24"; gene_id "11790"; transcript_name "TCONS_00000264"; gene_biotype "protein_coding"; class_code "j"; transcript_id "TCONS_00000264"; gene_name "Speg"; transcript_biotype "protein_coding"
NC_000067.7	Novogene	exon	75394471	75394649	.	+	.	nearest_ref "XM_011238645.3"; exon_number "25"; gene_id "11790"; transcript_name "TCONS_00000264"; gene_biotype "protein_coding"; class_code "j"; transcript_id "TCONS_00000264"; gene_name "Speg"; transcript_biotype "protein_coding"
NC_000067.7	Novogene	exon	75395075	75395101	.	+	.	nearest_ref "XM_011238645.3"; exon_number "26"; gene_id "11790"; transcript_name "TCONS_00000264"; gene_biotype "protein_coding"; class_code "j"; transcript_id "TCONS_00000264"; gene_name "Speg"; transcript_biotype "protein_coding"
NC_000067.7	Novogene	exon	75395615	75395767	.	+	.	nearest_ref "XM_011238645.3"; exon_number "27"; gene_id "11790"; transcript_name "TCONS_00000264"; gene_biotype "protein_coding"; class_code "j"; transcript_id "TCONS_00000264"; gene_name "Speg"; transcript_biotype "protein_coding"
NC_000067.7	Novogene	exon	75396873	75396915	.	+	.	nearest_ref "XM_011238645.3"; exon_number "28"; gene_id "11790"; transcript_name "TCONS_00000264"; gene_biotype "protein_coding"; class_code "j"; transcript_id "TCONS_00000264"; gene_name "Speg"; transcript_biotype "protein_coding"
NC_000067.7	Novogene	exon	75397935	75398003	.	+	.	nearest_ref "XM_011238645.3"; exon_number "29"; gene_id "11790"; transcript_name "TCONS_00000264"; gene_biotype "protein_coding"; class_code "j"; transcript_id "TCONS_00000264"; gene_name "Speg"; transcript_biotype "protein_coding"
NC_000067.7	Novogene	exon	75398204	75400172	.	+	.	nearest_ref "XM_011238645.3"; exon_number "30"; gene_id "11790"; transcript_name "TCONS_00000264"; gene_biotype "protein_coding"; class_code "j"; transcript_id "TCONS_00000264"; gene_name "Speg"; transcript_biotype "protein_coding"
NC_000067.7	Novogene	exon	75400460	75400591	.	+	.	nearest_ref "XM_011238645.3"; exon_number "31"; gene_id "11790"; transcript_name "TCONS_00000264"; gene_biotype "protein_coding"; class_code "j"; transcript_id "TCONS_00000264"; gene_name "Speg"; transcript_biotype "protein_coding"
NC_000067.7	Novogene	exon	75403408	75403524	.	+	.	nearest_ref "XM_011238645.3"; exon_number "32"; gene_id "11790"; transcript_name "TCONS_00000264"; gene_biotype "protein_coding"; class_code "j"; transcript_id "TCONS_00000264"; gene_name "Speg"; transcript_biotype "protein_coding"
NC_000067.7	Novogene	exon	75403688	75403855	.	+	.	nearest_ref "XM_011238645.3"; exon_number "33"; gene_id "11790"; transcript_name "TCONS_00000264"; gene_biotype "protein_coding"; class_code "j"; transcript_id "TCONS_00000264"; gene_name "Speg"; transcript_biotype "protein_coding"
NC_000067.7	Novogene	exon	75403958	75404080	.	+	.	nearest_ref "XM_011238645.3"; exon_number "34"; gene_id "11790"; transcript_name "TCONS_00000264"; gene_biotype "protein_coding"; class_code "j"; transcript_id "TCONS_00000264"; gene_name "Speg"; transcript_biotype "protein_coding"
NC_000067.7	Novogene	exon	75404255	75404422	.	+	.	nearest_ref "XM_011238645.3"; exon_number "35"; gene_id "11790"; transcript_name "TCONS_00000264"; gene_biotype "protein_coding"; class_code "j"; transcript_id "TCONS_00000264"; gene_name "Speg"; transcript_biotype "protein_coding"
NC_000067.7	Novogene	exon	75404536	75405115	.	+	.	nearest_ref "XM_011238645.3"; exon_number "36"; gene_id "11790"; transcript_name "TCONS_00000264"; gene_biotype "protein_coding"; class_code "j"; transcript_id "TCONS_00000264"; gene_name "Speg"; transcript_biotype "protein_coding"
NC_000067.7	Novogene	exon	75405704	75405943	.	+	.	nearest_ref "XM_011238645.3"; exon_number "37"; gene_id "11790"; transcript_name "TCONS_00000264"; gene_biotype "protein_coding"; class_code "j"; transcript_id "TCONS_00000264"; gene_name "Speg"; transcript_biotype "protein_coding"
NC_000067.7	Novogene	exon	75406041	75406264	.	+	.	nearest_ref "XM_011238645.3"; exon_number "38"; gene_id "11790"; transcript_name "TCONS_00000264"; gene_biotype "protein_coding"; class_code "j"; transcript_id "TCONS_00000264"; gene_name "Speg"; transcript_biotype "protein_coding"
NC_000067.7	Novogene	exon	75407083	75407158	.	+	.	nearest_ref "XM_011238645.3"; exon_number "39"; gene_id "11790"; transcript_name "TCONS_00000264"; gene_biotype "protein_coding"; class_code "j"; transcript_id "TCONS_00000264"; gene_name "Speg"; transcript_biotype "protein_coding"
NC_000067.7	Novogene	exon	75407441	75407590	.	+	.	nearest_ref "XM_011238645.3"; exon_number "40"; gene_id "11790"; transcript_name "TCONS_00000264"; gene_biotype "protein_coding"; class_code "j"; transcript_id "TCONS_00000264"; gene_name "Speg"; transcript_biotype "protein_coding"
NC_000067.7	Novogene	exon	75407903	75408912	.	+	.	nearest_ref "XM_011238645.3"; exon_number "41"; gene_id "11790"; transcript_name "TCONS_00000264"; gene_biotype "protein_coding"; class_code "j"; transcript_id "TCONS_00000264"; gene_name "Speg"; transcript_biotype "protein_coding"
NC_000067.7	Novogene	exon	75351983	75358818	.	+	.	nearest_ref "XM_011238645.3"; exon_number "1"; gene_id "11790"; transcript_name "TCONS_00000263"; gene_biotype "protein_coding"; class_code "j"; transcript_id "TCONS_00000263"; gene_name "Speg"; transcript_biotype "protein_coding"
NC_000067.7	Novogene	exon	75359781	75361389	.	+	.	nearest_ref "XM_011238645.3"; exon_number "2"; gene_id "11790"; transcript_name "TCONS_00000263"; gene_biotype "protein_coding"; class_code "j"; transcript_id "TCONS_00000263"; gene_name "Speg"; transcript_biotype "protein_coding"
NC_000067.7	Novogene	exon	75361472	75361631	.	+	.	nearest_ref "XM_011238645.3"; exon_number "3"; gene_id "11790"; transcript_name "TCONS_00000263"; gene_biotype "protein_coding"; class_code "j"; transcript_id "TCONS_00000263"; gene_name "Speg"; transcript_biotype "protein_coding"
NC_000067.7	Novogene	exon	75364442	75365748	.	+	.	nearest_ref "XM_011238645.3"; exon_number "4"; gene_id "11790"; transcript_name "TCONS_00000263"; gene_biotype "protein_coding"; class_code "j"; transcript_id "TCONS_00000263"; gene_name "Speg"; transcript_biotype "protein_coding"
NC_000067.7	Novogene	exon	75367623	75367766	.	+	.	nearest_ref "XM_011238645.3"; exon_number "5"; gene_id "11790"; transcript_name "TCONS_00000263"; gene_biotype "protein_coding"; class_code "j"; transcript_id "TCONS_00000263"; gene_name "Speg"; transcript_biotype "protein_coding"
NC_000067.7	Novogene	exon	75368406	75368588	.	+	.	nearest_ref "XM_011238645.3"; exon_number "6"; gene_id "11790"; transcript_name "TCONS_00000263"; gene_biotype "protein_coding"; class_code "j"; transcript_id "TCONS_00000263"; gene_name "Speg"; transcript_biotype "protein_coding"
NC_000067.7	Novogene	exon	75377699	75377874	.	+	.	nearest_ref "XM_011238645.3"; exon_number "7"; gene_id "11790"; transcript_name "TCONS_00000263"; gene_biotype "protein_coding"; class_code "j"; transcript_id "TCONS_00000263"; gene_name "Speg"; transcript_biotype "protein_coding"
NC_000067.7	Novogene	exon	75378107	75378195	.	+	.	nearest_ref "XM_011238645.3"; exon_number "8"; gene_id "11790"; transcript_name "TCONS_00000263"; gene_biotype "protein_coding"; class_code "j"; transcript_id "TCONS_00000263"; gene_name "Speg"; transcript_biotype "protein_coding"
NC_000067.7	Novogene	exon	75378942	75379117	.	+	.	nearest_ref "XM_011238645.3"; exon_number "9"; gene_id "11790"; transcript_name "TCONS_00000263"; gene_biotype "protein_coding"; class_code "j"; transcript_id "TCONS_00000263"; gene_name "Speg"; transcript_biotype "protein_coding"
NC_000067.7	Novogene	exon	75381531	75381791	.	+	.	nearest_ref "XM_011238645.3"; exon_number "10"; gene_id "11790"; transcript_name "TCONS_00000263"; gene_biotype "protein_coding"; class_code "j"; transcript_id "TCONS_00000263"; gene_name "Speg"; transcript_biotype "protein_coding"
NC_000067.7	Novogene	exon	75382950	75383108	.	+	.	nearest_ref "XM_011238645.3"; exon_number "11"; gene_id "11790"; transcript_name "TCONS_00000263"; gene_biotype "protein_coding"; class_code "j"; transcript_id "TCONS_00000263"; gene_name "Speg"; transcript_biotype "protein_coding"
NC_000067.7	Novogene	exon	75383223	75383412	.	+	.	nearest_ref "XM_011238645.3"; exon_number "12"; gene_id "11790"; transcript_name "TCONS_00000263"; gene_biotype "protein_coding"; class_code "j"; transcript_id "TCONS_00000263"; gene_name "Speg"; transcript_biotype "protein_coding"
NC_000067.7	Novogene	exon	75383520	75383743	.	+	.	nearest_ref "XM_011238645.3"; exon_number "13"; gene_id "11790"; transcript_name "TCONS_00000263"; gene_biotype "protein_coding"; class_code "j"; transcript_id "TCONS_00000263"; gene_name "Speg"; transcript_biotype "protein_coding"
NC_000067.7	Novogene	exon	75386598	75386717	.	+	.	nearest_ref "XM_011238645.3"; exon_number "14"; gene_id "11790"; transcript_name "TCONS_00000263"; gene_biotype "protein_coding"; class_code "j"; transcript_id "TCONS_00000263"; gene_name "Speg"; transcript_biotype "protein_coding"
NC_000067.7	Novogene	exon	75386933	75387037	.	+	.	nearest_ref "XM_011238645.3"; exon_number "15"; gene_id "11790"; transcript_name "TCONS_00000263"; gene_biotype "protein_coding"; class_code "j"; transcript_id "TCONS_00000263"; gene_name "Speg"; transcript_biotype "protein_coding"
NC_000067.7	Novogene	exon	75387201	75387407	.	+	.	nearest_ref "XM_011238645.3"; exon_number "16"; gene_id "11790"; transcript_name "TCONS_00000263"; gene_biotype "protein_coding"; class_code "j"; transcript_id "TCONS_00000263"; gene_name "Speg"; transcript_biotype "protein_coding"
NC_000067.7	Novogene	exon	75387723	75387846	.	+	.	nearest_ref "XM_011238645.3"; exon_number "17"; gene_id "11790"; transcript_name "TCONS_00000263"; gene_biotype "protein_coding"; class_code "j"; transcript_id "TCONS_00000263"; gene_name "Speg"; transcript_biotype "protein_coding"
NC_000067.7	Novogene	exon	75387930	75388105	.	+	.	nearest_ref "XM_011238645.3"; exon_number "18"; gene_id "11790"; transcript_name "TCONS_00000263"; gene_biotype "protein_coding"; class_code "j"; transcript_id "TCONS_00000263"; gene_name "Speg"; transcript_biotype "protein_coding"
NC_000067.7	Novogene	exon	75390960	75391072	.	+	.	nearest_ref "XM_011238645.3"; exon_number "19"; gene_id "11790"; transcript_name "TCONS_00000263"; gene_biotype "protein_coding"; class_code "j"; transcript_id "TCONS_00000263"; gene_name "Speg"; transcript_biotype "protein_coding"
NC_000067.7	Novogene	exon	75391644	75391812	.	+	.	nearest_ref "XM_011238645.3"; exon_number "20"; gene_id "11790"; transcript_name "TCONS_00000263"; gene_biotype "protein_coding"; class_code "j"; transcript_id "TCONS_00000263"; gene_name "Speg"; transcript_biotype "protein_coding"
NC_000067.7	Novogene	exon	75391964	75392060	.	+	.	nearest_ref "XM_011238645.3"; exon_number "21"; gene_id "11790"; transcript_name "TCONS_00000263"; gene_biotype "protein_coding"; class_code "j"; transcript_id "TCONS_00000263"; gene_name "Speg"; transcript_biotype "protein_coding"
NC_000067.7	Novogene	exon	75392186	75392386	.	+	.	nearest_ref "XM_011238645.3"; exon_number "22"; gene_id "11790"; transcript_name "TCONS_00000263"; gene_biotype "protein_coding"; class_code "j"; transcript_id "TCONS_00000263"; gene_name "Speg"; transcript_biotype "protein_coding"
NC_000067.7	Novogene	exon	75393687	75393744	.	+	.	nearest_ref "XM_011238645.3"; exon_number "23"; gene_id "11790"; transcript_name "TCONS_00000263"; gene_biotype "protein_coding"; class_code "j"; transcript_id "TCONS_00000263"; gene_name "Speg"; transcript_biotype "protein_coding"
NC_000067.7	Novogene	exon	75394307	75394384	.	+	.	nearest_ref "XM_011238645.3"; exon_number "24"; gene_id "11790"; transcript_name "TCONS_00000263"; gene_biotype "protein_coding"; class_code "j"; transcript_id "TCONS_00000263"; gene_name "Speg"; transcript_biotype "protein_coding"
NC_000067.7	Novogene	exon	75394471	75394649	.	+	.	nearest_ref "XM_011238645.3"; exon_number "25"; gene_id "11790"; transcript_name "TCONS_00000263"; gene_biotype "protein_coding"; class_code "j"; transcript_id "TCONS_00000263"; gene_name "Speg"; transcript_biotype "protein_coding"
NC_000067.7	Novogene	exon	75395075	75395101	.	+	.	nearest_ref "XM_011238645.3"; exon_number "26"; gene_id "11790"; transcript_name "TCONS_00000263"; gene_biotype "protein_coding"; class_code "j"; transcript_id "TCONS_00000263"; gene_name "Speg"; transcript_biotype "protein_coding"
NC_000067.7	Novogene	exon	75395615	75395767	.	+	.	nearest_ref "XM_011238645.3"; exon_number "27"; gene_id "11790"; transcript_name "TCONS_00000263"; gene_biotype "protein_coding"; class_code "j"; transcript_id "TCONS_00000263"; gene_name "Speg"; transcript_biotype "protein_coding"
NC_000067.7	Novogene	exon	75396873	75396915	.	+	.	nearest_ref "XM_011238645.3"; exon_number "28"; gene_id "11790"; transcript_name "TCONS_00000263"; gene_biotype "protein_coding"; class_code "j"; transcript_id "TCONS_00000263"; gene_name "Speg"; transcript_biotype "protein_coding"
NC_000067.7	Novogene	exon	75397935	75398003	.	+	.	nearest_ref "XM_011238645.3"; exon_number "29"; gene_id "11790"; transcript_name "TCONS_00000263"; gene_biotype "protein_coding"; class_code "j"; transcript_id "TCONS_00000263"; gene_name "Speg"; transcript_biotype "protein_coding"
NC_000067.7	Novogene	exon	75398204	75400172	.	+	.	nearest_ref "XM_011238645.3"; exon_number "30"; gene_id "11790"; transcript_name "TCONS_00000263"; gene_biotype "protein_coding"; class_code "j"; transcript_id "TCONS_00000263"; gene_name "Speg"; transcript_biotype "protein_coding"
NC_000067.7	Novogene	exon	75400460	75400591	.	+	.	nearest_ref "XM_011238645.3"; exon_number "31"; gene_id "11790"; transcript_name "TCONS_00000263"; gene_biotype "protein_coding"; class_code "j"; transcript_id "TCONS_00000263"; gene_name "Speg"; transcript_biotype "protein_coding"
NC_000067.7	Novogene	exon	75403408	75403524	.	+	.	nearest_ref "XM_011238645.3"; exon_number "32"; gene_id "11790"; transcript_name "TCONS_00000263"; gene_biotype "protein_coding"; class_code "j"; transcript_id "TCONS_00000263"; gene_name "Speg"; transcript_biotype "protein_coding"
NC_000067.7	Novogene	exon	75403688	75403855	.	+	.	nearest_ref "XM_011238645.3"; exon_number "33"; gene_id "11790"; transcript_name "TCONS_00000263"; gene_biotype "protein_coding"; class_code "j"; transcript_id "TCONS_00000263"; gene_name "Speg"; transcript_biotype "protein_coding"
NC_000067.7	Novogene	exon	75403958	75404080	.	+	.	nearest_ref "XM_011238645.3"; exon_number "34"; gene_id "11790"; transcript_name "TCONS_00000263"; gene_biotype "protein_coding"; class_code "j"; transcript_id "TCONS_00000263"; gene_name "Speg"; transcript_biotype "protein_coding"
NC_000067.7	Novogene	exon	75404255	75404422	.	+	.	nearest_ref "XM_011238645.3"; exon_number "35"; gene_id "11790"; transcript_name "TCONS_00000263"; gene_biotype "protein_coding"; class_code "j"; transcript_id "TCONS_00000263"; gene_name "Speg"; transcript_biotype "protein_coding"
NC_000067.7	Novogene	exon	75404536	75405115	.	+	.	nearest_ref "XM_011238645.3"; exon_number "36"; gene_id "11790"; transcript_name "TCONS_00000263"; gene_biotype "protein_coding"; class_code "j"; transcript_id "TCONS_00000263"; gene_name "Speg"; transcript_biotype "protein_coding"
NC_000067.7	Novogene	exon	75405704	75405943	.	+	.	nearest_ref "XM_011238645.3"; exon_number "37"; gene_id "11790"; transcript_name "TCONS_00000263"; gene_biotype "protein_coding"; class_code "j"; transcript_id "TCONS_00000263"; gene_name "Speg"; transcript_biotype "protein_coding"
NC_000067.7	Novogene	exon	75406041	75406264	.	+	.	nearest_ref "XM_011238645.3"; exon_number "38"; gene_id "11790"; transcript_name "TCONS_00000263"; gene_biotype "protein_coding"; class_code "j"; transcript_id "TCONS_00000263"; gene_name "Speg"; transcript_biotype "protein_coding"
NC_000067.7	Novogene	exon	75407083	75407158	.	+	.	nearest_ref "XM_011238645.3"; exon_number "39"; gene_id "11790"; transcript_name "TCONS_00000263"; gene_biotype "protein_coding"; class_code "j"; transcript_id "TCONS_00000263"; gene_name "Speg"; transcript_biotype "protein_coding"
NC_000067.7	Novogene	exon	75407441	75407590	.	+	.	nearest_ref "XM_011238645.3"; exon_number "40"; gene_id "11790"; transcript_name "TCONS_00000263"; gene_biotype "protein_coding"; class_code "j"; transcript_id "TCONS_00000263"; gene_name "Speg"; transcript_biotype "protein_coding"
NC_000067.7	Novogene	exon	75407903	75408912	.	+	.	nearest_ref "XM_011238645.3"; exon_number "41"; gene_id "11790"; transcript_name "TCONS_00000263"; gene_biotype "protein_coding"; class_code "j"; transcript_id "TCONS_00000263"; gene_name "Speg"; transcript_biotype "protein_coding"
NC_000067.7	Novogene	exon	75462473	75462603	.	+	.	nearest_ref "XM_011238675.3"; exon_number "1"; gene_id "16322"; transcript_name "TCONS_00000274"; gene_biotype "protein_coding"; class_code "o"; transcript_id "TCONS_00000274"; gene_name "Inha"; transcript_biotype "protein_coding"
NC_000067.7	Novogene	exon	75463284	75463553	.	+	.	nearest_ref "XM_011238675.3"; exon_number "2"; gene_id "16322"; transcript_name "TCONS_00000274"; gene_biotype "protein_coding"; class_code "o"; transcript_id "TCONS_00000274"; gene_name "Inha"; transcript_biotype "protein_coding"
NC_000067.7	Novogene	exon	75463867	75463971	.	+	.	nearest_ref "XM_011238675.3"; exon_number "3"; gene_id "16322"; transcript_name "TCONS_00000274"; gene_biotype "protein_coding"; class_code "o"; transcript_id "TCONS_00000274"; gene_name "Inha"; transcript_biotype "protein_coding"
NC_000067.7	Novogene	exon	75464273	75464434	.	+	.	nearest_ref "XM_011238675.3"; exon_number "4"; gene_id "16322"; transcript_name "TCONS_00000274"; gene_biotype "protein_coding"; class_code "o"; transcript_id "TCONS_00000274"; gene_name "Inha"; transcript_biotype "protein_coding"
NC_000067.7	Novogene	exon	75464550	75464706	.	+	.	nearest_ref "XM_011238675.3"; exon_number "5"; gene_id "16322"; transcript_name "TCONS_00000274"; gene_biotype "protein_coding"; class_code "o"; transcript_id "TCONS_00000274"; gene_name "Inha"; transcript_biotype "protein_coding"
NC_000067.7	Novogene	exon	75465233	75465345	.	+	.	nearest_ref "XM_011238675.3"; exon_number "6"; gene_id "16322"; transcript_name "TCONS_00000274"; gene_biotype "protein_coding"; class_code "o"; transcript_id "TCONS_00000274"; gene_name "Inha"; transcript_biotype "protein_coding"
NC_000067.7	Novogene	exon	75466127	75466393	.	+	.	nearest_ref "XM_011238675.3"; exon_number "7"; gene_id "16322"; transcript_name "TCONS_00000274"; gene_biotype "protein_coding"; class_code "o"; transcript_id "TCONS_00000274"; gene_name "Inha"; transcript_biotype "protein_coding"
NC_000067.7	Novogene	exon	75467440	75467712	.	+	.	nearest_ref "XM_011238675.3"; exon_number "8"; gene_id "16322"; transcript_name "TCONS_00000274"; gene_biotype "protein_coding"; class_code "o"; transcript_id "TCONS_00000274"; gene_name "Inha"; transcript_biotype "protein_coding"
NC_000067.7	Novogene	exon	75467832	75468101	.	+	.	nearest_ref "XM_011238675.3"; exon_number "9"; gene_id "16322"; transcript_name "TCONS_00000274"; gene_biotype "protein_coding"; class_code "o"; transcript_id "TCONS_00000274"; gene_name "Inha"; transcript_biotype "protein_coding"
NC_000067.7	Novogene	exon	75468711	75468986	.	+	.	nearest_ref "XM_011238675.3"; exon_number "10"; gene_id "16322"; transcript_name "TCONS_00000274"; gene_biotype "protein_coding"; class_code "o"; transcript_id "TCONS_00000274"; gene_name "Inha"; transcript_biotype "protein_coding"
NC_000067.7	Novogene	exon	75469150	75469437	.	+	.	nearest_ref "XM_011238675.3"; exon_number "11"; gene_id "16322"; transcript_name "TCONS_00000274"; gene_biotype "protein_coding"; class_code "o"; transcript_id "TCONS_00000274"; gene_name "Inha"; transcript_biotype "protein_coding"
NC_000067.7	Novogene	exon	75469514	75469789	.	+	.	nearest_ref "XM_011238675.3"; exon_number "12"; gene_id "16322"; transcript_name "TCONS_00000274"; gene_biotype "protein_coding"; class_code "o"; transcript_id "TCONS_00000274"; gene_name "Inha"; transcript_biotype "protein_coding"
NC_000067.7	Novogene	exon	75470429	75470701	.	+	.	nearest_ref "XM_011238675.3"; exon_number "13"; gene_id "16322"; transcript_name "TCONS_00000274"; gene_biotype "protein_coding"; class_code "o"; transcript_id "TCONS_00000274"; gene_name "Inha"; transcript_biotype "protein_coding"
NC_000067.7	Novogene	exon	75473652	75473924	.	+	.	nearest_ref "XM_011238675.3"; exon_number "14"; gene_id "16322"; transcript_name "TCONS_00000274"; gene_biotype "protein_coding"; class_code "o"; transcript_id "TCONS_00000274"; gene_name "Inha"; transcript_biotype "protein_coding"
NC_000067.7	Novogene	exon	75474719	75474991	.	+	.	nearest_ref "XM_011238675.3"; exon_number "15"; gene_id "16322"; transcript_name "TCONS_00000274"; gene_biotype "protein_coding"; class_code "o"; transcript_id "TCONS_00000274"; gene_name "Inha"; transcript_biotype "protein_coding"
NC_000067.7	Novogene	exon	75476546	75476818	.	+	.	nearest_ref "XM_011238675.3"; exon_number "16"; gene_id "16322"; transcript_name "TCONS_00000274"; gene_biotype "protein_coding"; class_code "o"; transcript_id "TCONS_00000274"; gene_name "Inha"; transcript_biotype "protein_coding"
NC_000067.7	Novogene	exon	75478603	75478899	.	+	.	nearest_ref "XM_011238675.3"; exon_number "17"; gene_id "16322"; transcript_name "TCONS_00000274"; gene_biotype "protein_coding"; class_code "o"; transcript_id "TCONS_00000274"; gene_name "Inha"; transcript_biotype "protein_coding"
NC_000067.7	Novogene	exon	75479557	75479859	.	+	.	nearest_ref "XM_011238675.3"; exon_number "18"; gene_id "16322"; transcript_name "TCONS_00000274"; gene_biotype "protein_coding"; class_code "o"; transcript_id "TCONS_00000274"; gene_name "Inha"; transcript_biotype "protein_coding"
NC_000067.7	Novogene	exon	75480011	75480262	.	+	.	nearest_ref "XM_011238675.3"; exon_number "19"; gene_id "16322"; transcript_name "TCONS_00000274"; gene_biotype "protein_coding"; class_code "o"; transcript_id "TCONS_00000274"; gene_name "Inha"; transcript_biotype "protein_coding"
NC_000067.7	Novogene	exon	75480341	75480610	.	+	.	nearest_ref "XM_011238675.3"; exon_number "20"; gene_id "16322"; transcript_name "TCONS_00000274"; gene_biotype "protein_coding"; class_code "o"; transcript_id "TCONS_00000274"; gene_name "Inha"; transcript_biotype "protein_coding"
NC_000067.7	Novogene	exon	75481857	75487004	.	+	.	nearest_ref "XM_011238675.3"; exon_number "21"; gene_id "16322"; transcript_name "TCONS_00000274"; gene_biotype "protein_coding"; class_code "o"; transcript_id "TCONS_00000274"; gene_name "Inha"; transcript_biotype "protein_coding"
NC_000067.7	Novogene	exon	75463310	75463553	.	+	.	nearest_ref "XM_011238675.3"; exon_number "1"; gene_id "16322"; transcript_name "TCONS_00000275"; gene_biotype "protein_coding"; class_code "o"; transcript_id "TCONS_00000275"; gene_name "Inha"; transcript_biotype "protein_coding"
NC_000067.7	Novogene	exon	75463867	75463971	.	+	.	nearest_ref "XM_011238675.3"; exon_number "2"; gene_id "16322"; transcript_name "TCONS_00000275"; gene_biotype "protein_coding"; class_code "o"; transcript_id "TCONS_00000275"; gene_name "Inha"; transcript_biotype "protein_coding"
NC_000067.7	Novogene	exon	75464273	75464434	.	+	.	nearest_ref "XM_011238675.3"; exon_number "3"; gene_id "16322"; transcript_name "TCONS_00000275"; gene_biotype "protein_coding"; class_code "o"; transcript_id "TCONS_00000275"; gene_name "Inha"; transcript_biotype "protein_coding"
NC_000067.7	Novogene	exon	75464550	75464706	.	+	.	nearest_ref "XM_011238675.3"; exon_number "4"; gene_id "16322"; transcript_name "TCONS_00000275"; gene_biotype "protein_coding"; class_code "o"; transcript_id "TCONS_00000275"; gene_name "Inha"; transcript_biotype "protein_coding"
NC_000067.7	Novogene	exon	75465233	75465345	.	+	.	nearest_ref "XM_011238675.3"; exon_number "5"; gene_id "16322"; transcript_name "TCONS_00000275"; gene_biotype "protein_coding"; class_code "o"; transcript_id "TCONS_00000275"; gene_name "Inha"; transcript_biotype "protein_coding"
NC_000067.7	Novogene	exon	75466127	75466393	.	+	.	nearest_ref "XM_011238675.3"; exon_number "6"; gene_id "16322"; transcript_name "TCONS_00000275"; gene_biotype "protein_coding"; class_code "o"; transcript_id "TCONS_00000275"; gene_name "Inha"; transcript_biotype "protein_coding"
NC_000067.7	Novogene	exon	75467440	75467712	.	+	.	nearest_ref "XM_011238675.3"; exon_number "7"; gene_id "16322"; transcript_name "TCONS_00000275"; gene_biotype "protein_coding"; class_code "o"; transcript_id "TCONS_00000275"; gene_name "Inha"; transcript_biotype "protein_coding"
NC_000067.7	Novogene	exon	75467832	75468101	.	+	.	nearest_ref "XM_011238675.3"; exon_number "8"; gene_id "16322"; transcript_name "TCONS_00000275"; gene_biotype "protein_coding"; class_code "o"; transcript_id "TCONS_00000275"; gene_name "Inha"; transcript_biotype "protein_coding"
NC_000067.7	Novogene	exon	75469150	75469437	.	+	.	nearest_ref "XM_011238675.3"; exon_number "9"; gene_id "16322"; transcript_name "TCONS_00000275"; gene_biotype "protein_coding"; class_code "o"; transcript_id "TCONS_00000275"; gene_name "Inha"; transcript_biotype "protein_coding"
NC_000067.7	Novogene	exon	75469514	75469789	.	+	.	nearest_ref "XM_011238675.3"; exon_number "10"; gene_id "16322"; transcript_name "TCONS_00000275"; gene_biotype "protein_coding"; class_code "o"; transcript_id "TCONS_00000275"; gene_name "Inha"; transcript_biotype "protein_coding"
NC_000067.7	Novogene	exon	75470429	75470701	.	+	.	nearest_ref "XM_011238675.3"; exon_number "11"; gene_id "16322"; transcript_name "TCONS_00000275"; gene_biotype "protein_coding"; class_code "o"; transcript_id "TCONS_00000275"; gene_name "Inha"; transcript_biotype "protein_coding"
NC_000067.7	Novogene	exon	75473652	75473924	.	+	.	nearest_ref "XM_011238675.3"; exon_number "12"; gene_id "16322"; transcript_name "TCONS_00000275"; gene_biotype "protein_coding"; class_code "o"; transcript_id "TCONS_00000275"; gene_name "Inha"; transcript_biotype "protein_coding"
NC_000067.7	Novogene	exon	75474719	75474991	.	+	.	nearest_ref "XM_011238675.3"; exon_number "13"; gene_id "16322"; transcript_name "TCONS_00000275"; gene_biotype "protein_coding"; class_code "o"; transcript_id "TCONS_00000275"; gene_name "Inha"; transcript_biotype "protein_coding"
NC_000067.7	Novogene	exon	75476546	75476818	.	+	.	nearest_ref "XM_011238675.3"; exon_number "14"; gene_id "16322"; transcript_name "TCONS_00000275"; gene_biotype "protein_coding"; class_code "o"; transcript_id "TCONS_00000275"; gene_name "Inha"; transcript_biotype "protein_coding"
NC_000067.7	Novogene	exon	75478603	75478899	.	+	.	nearest_ref "XM_011238675.3"; exon_number "15"; gene_id "16322"; transcript_name "TCONS_00000275"; gene_biotype "protein_coding"; class_code "o"; transcript_id "TCONS_00000275"; gene_name "Inha"; transcript_biotype "protein_coding"
NC_000067.7	Novogene	exon	75479557	75479859	.	+	.	nearest_ref "XM_011238675.3"; exon_number "16"; gene_id "16322"; transcript_name "TCONS_00000275"; gene_biotype "protein_coding"; class_code "o"; transcript_id "TCONS_00000275"; gene_name "Inha"; transcript_biotype "protein_coding"
NC_000067.7	Novogene	exon	75480011	75480262	.	+	.	nearest_ref "XM_011238675.3"; exon_number "17"; gene_id "16322"; transcript_name "TCONS_00000275"; gene_biotype "protein_coding"; class_code "o"; transcript_id "TCONS_00000275"; gene_name "Inha"; transcript_biotype "protein_coding"
NC_000067.7	Novogene	exon	75480341	75480610	.	+	.	nearest_ref "XM_011238675.3"; exon_number "18"; gene_id "16322"; transcript_name "TCONS_00000275"; gene_biotype "protein_coding"; class_code "o"; transcript_id "TCONS_00000275"; gene_name "Inha"; transcript_biotype "protein_coding"
NC_000067.7	Novogene	exon	75481857	75486967	.	+	.	nearest_ref "XM_011238675.3"; exon_number "19"; gene_id "16322"; transcript_name "TCONS_00000275"; gene_biotype "protein_coding"; class_code "o"; transcript_id "TCONS_00000275"; gene_name "Inha"; transcript_biotype "protein_coding"
NC_000067.7	Novogene	exon	75523143	75523257	.	+	.	nearest_ref "NM_009208.3"; exon_number "1"; gene_id "20536"; transcript_name "TCONS_00000278"; gene_biotype "protein_coding"; class_code "j"; transcript_id "TCONS_00000278"; gene_name "Slc4a3"; transcript_biotype "protein_coding"
NC_000067.7	Novogene	exon	75523416	75523565	.	+	.	nearest_ref "NM_009208.3"; exon_number "2"; gene_id "20536"; transcript_name "TCONS_00000278"; gene_biotype "protein_coding"; class_code "j"; transcript_id "TCONS_00000278"; gene_name "Slc4a3"; transcript_biotype "protein_coding"
NC_000067.7	Novogene	exon	75523877	75524865	.	+	.	nearest_ref "NM_009208.3"; exon_number "3"; gene_id "20536"; transcript_name "TCONS_00000278"; gene_biotype "protein_coding"; class_code "j"; transcript_id "TCONS_00000278"; gene_name "Slc4a3"; transcript_biotype "protein_coding"
NC_000067.7	Novogene	exon	75524960	75525075	.	+	.	nearest_ref "NM_009208.3"; exon_number "4"; gene_id "20536"; transcript_name "TCONS_00000278"; gene_biotype "protein_coding"; class_code "j"; transcript_id "TCONS_00000278"; gene_name "Slc4a3"; transcript_biotype "protein_coding"
NC_000067.7	Novogene	exon	75525513	75525709	.	+	.	nearest_ref "NM_009208.3"; exon_number "5"; gene_id "20536"; transcript_name "TCONS_00000278"; gene_biotype "protein_coding"; class_code "j"; transcript_id "TCONS_00000278"; gene_name "Slc4a3"; transcript_biotype "protein_coding"
NC_000067.7	Novogene	exon	75527148	75527296	.	+	.	nearest_ref "NM_009208.3"; exon_number "6"; gene_id "20536"; transcript_name "TCONS_00000278"; gene_biotype "protein_coding"; class_code "j"; transcript_id "TCONS_00000278"; gene_name "Slc4a3"; transcript_biotype "protein_coding"
NC_000067.7	Novogene	exon	75527399	75528026	.	+	.	nearest_ref "NM_009208.3"; exon_number "7"; gene_id "20536"; transcript_name "TCONS_00000278"; gene_biotype "protein_coding"; class_code "j"; transcript_id "TCONS_00000278"; gene_name "Slc4a3"; transcript_biotype "protein_coding"
NC_000067.7	Novogene	exon	75528281	75528464	.	+	.	nearest_ref "NM_009208.3"; exon_number "8"; gene_id "20536"; transcript_name "TCONS_00000278"; gene_biotype "protein_coding"; class_code "j"; transcript_id "TCONS_00000278"; gene_name "Slc4a3"; transcript_biotype "protein_coding"
NC_000067.7	Novogene	exon	75528797	75528896	.	+	.	nearest_ref "NM_009208.3"; exon_number "9"; gene_id "20536"; transcript_name "TCONS_00000278"; gene_biotype "protein_coding"; class_code "j"; transcript_id "TCONS_00000278"; gene_name "Slc4a3"; transcript_biotype "protein_coding"
NC_000067.7	Novogene	exon	75529267	75529451	.	+	.	nearest_ref "NM_009208.3"; exon_number "10"; gene_id "20536"; transcript_name "TCONS_00000278"; gene_biotype "protein_coding"; class_code "j"; transcript_id "TCONS_00000278"; gene_name "Slc4a3"; transcript_biotype "protein_coding"
NC_000067.7	Novogene	exon	75529900	75530125	.	+	.	nearest_ref "NM_009208.3"; exon_number "11"; gene_id "20536"; transcript_name "TCONS_00000278"; gene_biotype "protein_coding"; class_code "j"; transcript_id "TCONS_00000278"; gene_name "Slc4a3"; transcript_biotype "protein_coding"
NC_000067.7	Novogene	exon	75530268	75530486	.	+	.	nearest_ref "NM_009208.3"; exon_number "12"; gene_id "20536"; transcript_name "TCONS_00000278"; gene_biotype "protein_coding"; class_code "j"; transcript_id "TCONS_00000278"; gene_name "Slc4a3"; transcript_biotype "protein_coding"
NC_000067.7	Novogene	exon	75530804	75530952	.	+	.	nearest_ref "NM_009208.3"; exon_number "13"; gene_id "20536"; transcript_name "TCONS_00000278"; gene_biotype "protein_coding"; class_code "j"; transcript_id "TCONS_00000278"; gene_name "Slc4a3"; transcript_biotype "protein_coding"
NC_000067.7	Novogene	exon	75531146	75531340	.	+	.	nearest_ref "NM_009208.3"; exon_number "14"; gene_id "20536"; transcript_name "TCONS_00000278"; gene_biotype "protein_coding"; class_code "j"; transcript_id "TCONS_00000278"; gene_name "Slc4a3"; transcript_biotype "protein_coding"
NC_000067.7	Novogene	exon	75531567	75531785	.	+	.	nearest_ref "NM_009208.3"; exon_number "15"; gene_id "20536"; transcript_name "TCONS_00000278"; gene_biotype "protein_coding"; class_code "j"; transcript_id "TCONS_00000278"; gene_name "Slc4a3"; transcript_biotype "protein_coding"
NC_000067.7	Novogene	exon	75532055	75532144	.	+	.	nearest_ref "NM_009208.3"; exon_number "16"; gene_id "20536"; transcript_name "TCONS_00000278"; gene_biotype "protein_coding"; class_code "j"; transcript_id "TCONS_00000278"; gene_name "Slc4a3"; transcript_biotype "protein_coding"
NC_000067.7	Novogene	exon	75532583	75532749	.	+	.	nearest_ref "NM_009208.3"; exon_number "17"; gene_id "20536"; transcript_name "TCONS_00000278"; gene_biotype "protein_coding"; class_code "j"; transcript_id "TCONS_00000278"; gene_name "Slc4a3"; transcript_biotype "protein_coding"
NC_000067.7	Novogene	exon	75533388	75533641	.	+	.	nearest_ref "NM_009208.3"; exon_number "18"; gene_id "20536"; transcript_name "TCONS_00000278"; gene_biotype "protein_coding"; class_code "j"; transcript_id "TCONS_00000278"; gene_name "Slc4a3"; transcript_biotype "protein_coding"
NC_000067.7	Novogene	exon	75533917	75534086	.	+	.	nearest_ref "NM_009208.3"; exon_number "19"; gene_id "20536"; transcript_name "TCONS_00000278"; gene_biotype "protein_coding"; class_code "j"; transcript_id "TCONS_00000278"; gene_name "Slc4a3"; transcript_biotype "protein_coding"
NC_000067.7	Novogene	exon	75534271	75534444	.	+	.	nearest_ref "NM_009208.3"; exon_number "20"; gene_id "20536"; transcript_name "TCONS_00000278"; gene_biotype "protein_coding"; class_code "j"; transcript_id "TCONS_00000278"; gene_name "Slc4a3"; transcript_biotype "protein_coding"
NC_000067.7	Novogene	exon	75535457	75542093	.	+	.	nearest_ref "NM_009208.3"; exon_number "21"; gene_id "20536"; transcript_name "TCONS_00000278"; gene_biotype "protein_coding"; class_code "j"; transcript_id "TCONS_00000278"; gene_name "Slc4a3"; transcript_biotype "protein_coding"
NC_000067.7	Novogene	exon	82817236	82817610	.	+	.	nearest_ref "XM_006496430.4"; exon_number "1"; gene_id "15463"; transcript_name "TCONS_00000297"; gene_biotype "protein_coding"; class_code "j"; transcript_id "TCONS_00000297"; gene_name "Agfg1"; transcript_biotype "protein_coding"
NC_000067.7	Novogene	exon	82836077	82836170	.	+	.	nearest_ref "XM_006496430.4"; exon_number "2"; gene_id "15463"; transcript_name "TCONS_00000297"; gene_biotype "protein_coding"; class_code "j"; transcript_id "TCONS_00000297"; gene_name "Agfg1"; transcript_biotype "protein_coding"
NC_000067.7	Novogene	exon	82848406	82848521	.	+	.	nearest_ref "XM_006496430.4"; exon_number "3"; gene_id "15463"; transcript_name "TCONS_00000297"; gene_biotype "protein_coding"; class_code "j"; transcript_id "TCONS_00000297"; gene_name "Agfg1"; transcript_biotype "protein_coding"
NC_000067.7	Novogene	exon	82853009	82853171	.	+	.	nearest_ref "XM_006496430.4"; exon_number "4"; gene_id "15463"; transcript_name "TCONS_00000297"; gene_biotype "protein_coding"; class_code "j"; transcript_id "TCONS_00000297"; gene_name "Agfg1"; transcript_biotype "protein_coding"
NC_000067.7	Novogene	exon	82853892	82854045	.	+	.	nearest_ref "XM_006496430.4"; exon_number "5"; gene_id "15463"; transcript_name "TCONS_00000297"; gene_biotype "protein_coding"; class_code "j"; transcript_id "TCONS_00000297"; gene_name "Agfg1"; transcript_biotype "protein_coding"
NC_000067.7	Novogene	exon	82857729	82857848	.	+	.	nearest_ref "XM_006496430.4"; exon_number "6"; gene_id "15463"; transcript_name "TCONS_00000297"; gene_biotype "protein_coding"; class_code "j"; transcript_id "TCONS_00000297"; gene_name "Agfg1"; transcript_biotype "protein_coding"
NC_000067.7	Novogene	exon	82858468	82858539	.	+	.	nearest_ref "XM_006496430.4"; exon_number "7"; gene_id "15463"; transcript_name "TCONS_00000297"; gene_biotype "protein_coding"; class_code "j"; transcript_id "TCONS_00000297"; gene_name "Agfg1"; transcript_biotype "protein_coding"
NC_000067.7	Novogene	exon	82859949	82860158	.	+	.	nearest_ref "XM_006496430.4"; exon_number "8"; gene_id "15463"; transcript_name "TCONS_00000297"; gene_biotype "protein_coding"; class_code "j"; transcript_id "TCONS_00000297"; gene_name "Agfg1"; transcript_biotype "protein_coding"
NC_000067.7	Novogene	exon	82860902	82861082	.	+	.	nearest_ref "XM_006496430.4"; exon_number "9"; gene_id "15463"; transcript_name "TCONS_00000297"; gene_biotype "protein_coding"; class_code "j"; transcript_id "TCONS_00000297"; gene_name "Agfg1"; transcript_biotype "protein_coding"
NC_000067.7	Novogene	exon	82863835	82863908	.	+	.	nearest_ref "XM_006496430.4"; exon_number "10"; gene_id "15463"; transcript_name "TCONS_00000297"; gene_biotype "protein_coding"; class_code "j"; transcript_id "TCONS_00000297"; gene_name "Agfg1"; transcript_biotype "protein_coding"
NC_000067.7	Novogene	exon	82864096	82864188	.	+	.	nearest_ref "XM_006496430.4"; exon_number "11"; gene_id "15463"; transcript_name "TCONS_00000297"; gene_biotype "protein_coding"; class_code "j"; transcript_id "TCONS_00000297"; gene_name "Agfg1"; transcript_biotype "protein_coding"
NC_000067.7	Novogene	exon	82871145	82871303	.	+	.	nearest_ref "XM_006496430.4"; exon_number "12"; gene_id "15463"; transcript_name "TCONS_00000297"; gene_biotype "protein_coding"; class_code "j"; transcript_id "TCONS_00000297"; gene_name "Agfg1"; transcript_biotype "protein_coding"
NC_000067.7	Novogene	exon	82872197	82872288	.	+	.	nearest_ref "XM_006496430.4"; exon_number "13"; gene_id "15463"; transcript_name "TCONS_00000297"; gene_biotype "protein_coding"; class_code "j"; transcript_id "TCONS_00000297"; gene_name "Agfg1"; transcript_biotype "protein_coding"
NC_000067.7	Novogene	exon	82872720	82873394	.	+	.	nearest_ref "XM_006496430.4"; exon_number "14"; gene_id "15463"; transcript_name "TCONS_00000297"; gene_biotype "protein_coding"; class_code "j"; transcript_id "TCONS_00000297"; gene_name "Agfg1"; transcript_biotype "protein_coding"
NC_000067.7	Novogene	exon	85177338	85177443	.	+	.	nearest_ref "XM_006496523.3"; exon_number "1"; gene_id "665378"; transcript_name "TCONS_00000299"; gene_biotype "protein_coding"; class_code "j"; transcript_id "TCONS_00000299"; gene_name "Gm7609"; transcript_biotype "protein_coding"
NC_000067.7	Novogene	exon	85179861	85180029	.	+	.	nearest_ref "XM_006496523.3"; exon_number "2"; gene_id "665378"; transcript_name "TCONS_00000299"; gene_biotype "protein_coding"; class_code "j"; transcript_id "TCONS_00000299"; gene_name "Gm7609"; transcript_biotype "protein_coding"
NC_000067.7	Novogene	exon	85190348	85191389	.	+	.	nearest_ref "XM_006496523.3"; exon_number "3"; gene_id "665378"; transcript_name "TCONS_00000299"; gene_biotype "protein_coding"; class_code "j"; transcript_id "TCONS_00000299"; gene_name "Gm7609"; transcript_biotype "protein_coding"
NC_000067.7	Novogene	exon	86631154	86631240	.	+	.	nearest_ref "XM_030252488.2"; exon_number "1"; gene_id "208718"; transcript_name "TCONS_00000310"; gene_biotype "protein_coding"; class_code "j"; transcript_id "TCONS_00000310"; gene_name "Dis3l2"; transcript_biotype "protein_coding"
NC_000067.7	Novogene	exon	86672403	86672550	.	+	.	nearest_ref "XM_030252488.2"; exon_number "2"; gene_id "208718"; transcript_name "TCONS_00000310"; gene_biotype "protein_coding"; class_code "j"; transcript_id "TCONS_00000310"; gene_name "Dis3l2"; transcript_biotype "protein_coding"
NC_000067.7	Novogene	exon	86673063	86673220	.	+	.	nearest_ref "XM_030252488.2"; exon_number "3"; gene_id "208718"; transcript_name "TCONS_00000310"; gene_biotype "protein_coding"; class_code "j"; transcript_id "TCONS_00000310"; gene_name "Dis3l2"; transcript_biotype "protein_coding"
NC_000067.7	Novogene	exon	86681949	86682002	.	+	.	nearest_ref "XM_030252488.2"; exon_number "4"; gene_id "208718"; transcript_name "TCONS_00000310"; gene_biotype "protein_coding"; class_code "j"; transcript_id "TCONS_00000310"; gene_name "Dis3l2"; transcript_biotype "protein_coding"
NC_000067.7	Novogene	exon	86688010	86688111	.	+	.	nearest_ref "XM_030252488.2"; exon_number "5"; gene_id "208718"; transcript_name "TCONS_00000310"; gene_biotype "protein_coding"; class_code "j"; transcript_id "TCONS_00000310"; gene_name "Dis3l2"; transcript_biotype "protein_coding"
NC_000067.7	Novogene	exon	86719138	86719179	.	+	.	nearest_ref "XM_030252488.2"; exon_number "6"; gene_id "208718"; transcript_name "TCONS_00000310"; gene_biotype "protein_coding"; class_code "j"; transcript_id "TCONS_00000310"; gene_name "Dis3l2"; transcript_biotype "protein_coding"
NC_000067.7	Novogene	exon	86748944	86749172	.	+	.	nearest_ref "XM_030252488.2"; exon_number "7"; gene_id "208718"; transcript_name "TCONS_00000310"; gene_biotype "protein_coding"; class_code "j"; transcript_id "TCONS_00000310"; gene_name "Dis3l2"; transcript_biotype "protein_coding"
NC_000067.7	Novogene	exon	86782082	86782182	.	+	.	nearest_ref "XM_030252488.2"; exon_number "8"; gene_id "208718"; transcript_name "TCONS_00000310"; gene_biotype "protein_coding"; class_code "j"; transcript_id "TCONS_00000310"; gene_name "Dis3l2"; transcript_biotype "protein_coding"
NC_000067.7	Novogene	exon	86784849	86785096	.	+	.	nearest_ref "XM_030252488.2"; exon_number "9"; gene_id "208718"; transcript_name "TCONS_00000310"; gene_biotype "protein_coding"; class_code "j"; transcript_id "TCONS_00000310"; gene_name "Dis3l2"; transcript_biotype "protein_coding"
NC_000067.7	Novogene	exon	86806125	86806298	.	+	.	nearest_ref "XM_030252488.2"; exon_number "10"; gene_id "208718"; transcript_name "TCONS_00000310"; gene_biotype "protein_coding"; class_code "j"; transcript_id "TCONS_00000310"; gene_name "Dis3l2"; transcript_biotype "protein_coding"
NC_000067.7	Novogene	exon	86858476	86858555	.	+	.	nearest_ref "XM_030252488.2"; exon_number "11"; gene_id "208718"; transcript_name "TCONS_00000310"; gene_biotype "protein_coding"; class_code "j"; transcript_id "TCONS_00000310"; gene_name "Dis3l2"; transcript_biotype "protein_coding"
NC_000067.7	Novogene	exon	86887465	86887577	.	+	.	nearest_ref "XM_030252488.2"; exon_number "12"; gene_id "208718"; transcript_name "TCONS_00000310"; gene_biotype "protein_coding"; class_code "j"; transcript_id "TCONS_00000310"; gene_name "Dis3l2"; transcript_biotype "protein_coding"
NC_000067.7	Novogene	exon	86901122	86901229	.	+	.	nearest_ref "XM_030252488.2"; exon_number "13"; gene_id "208718"; transcript_name "TCONS_00000310"; gene_biotype "protein_coding"; class_code "j"; transcript_id "TCONS_00000310"; gene_name "Dis3l2"; transcript_biotype "protein_coding"
NC_000067.7	Novogene	exon	86917814	86918047	.	+	.	nearest_ref "XM_030252488.2"; exon_number "14"; gene_id "208718"; transcript_name "TCONS_00000310"; gene_biotype "protein_coding"; class_code "j"; transcript_id "TCONS_00000310"; gene_name "Dis3l2"; transcript_biotype "protein_coding"
NC_000067.7	Novogene	exon	86948760	86948839	.	+	.	nearest_ref "XM_030252488.2"; exon_number "15"; gene_id "208718"; transcript_name "TCONS_00000310"; gene_biotype "protein_coding"; class_code "j"; transcript_id "TCONS_00000310"; gene_name "Dis3l2"; transcript_biotype "protein_coding"
NC_000067.7	Novogene	exon	86971739	86971922	.	+	.	nearest_ref "XM_030252488.2"; exon_number "16"; gene_id "208718"; transcript_name "TCONS_00000310"; gene_biotype "protein_coding"; class_code "j"; transcript_id "TCONS_00000310"; gene_name "Dis3l2"; transcript_biotype "protein_coding"
NC_000067.7	Novogene	exon	86972552	86972638	.	+	.	nearest_ref "XM_030252488.2"; exon_number "17"; gene_id "208718"; transcript_name "TCONS_00000310"; gene_biotype "protein_coding"; class_code "j"; transcript_id "TCONS_00000310"; gene_name "Dis3l2"; transcript_biotype "protein_coding"
NC_000067.7	Novogene	exon	86974759	86974906	.	+	.	nearest_ref "XM_030252488.2"; exon_number "18"; gene_id "208718"; transcript_name "TCONS_00000310"; gene_biotype "protein_coding"; class_code "j"; transcript_id "TCONS_00000310"; gene_name "Dis3l2"; transcript_biotype "protein_coding"
NC_000067.7	Novogene	exon	86975170	86975300	.	+	.	nearest_ref "XM_030252488.2"; exon_number "19"; gene_id "208718"; transcript_name "TCONS_00000310"; gene_biotype "protein_coding"; class_code "j"; transcript_id "TCONS_00000310"; gene_name "Dis3l2"; transcript_biotype "protein_coding"
NC_000067.7	Novogene	exon	86975410	86975514	.	+	.	nearest_ref "XM_030252488.2"; exon_number "20"; gene_id "208718"; transcript_name "TCONS_00000310"; gene_biotype "protein_coding"; class_code "j"; transcript_id "TCONS_00000310"; gene_name "Dis3l2"; transcript_biotype "protein_coding"
NC_000067.7	Novogene	exon	86976555	86976656	.	+	.	nearest_ref "XM_030252488.2"; exon_number "21"; gene_id "208718"; transcript_name "TCONS_00000310"; gene_biotype "protein_coding"; class_code "j"; transcript_id "TCONS_00000310"; gene_name "Dis3l2"; transcript_biotype "protein_coding"
NC_000067.7	Novogene	exon	86977345	86977818	.	+	.	nearest_ref "XM_030252488.2"; exon_number "22"; gene_id "208718"; transcript_name "TCONS_00000310"; gene_biotype "protein_coding"; class_code "j"; transcript_id "TCONS_00000310"; gene_name "Dis3l2"; transcript_biotype "protein_coding"
NC_000067.7	Novogene	exon	87141661	87142217	.	+	.	nearest_ref "XM_036165583.1"; exon_number "1"; gene_id "26987"; transcript_name "TCONS_00000316"; gene_biotype "protein_coding"; class_code "j"; transcript_id "TCONS_00000316"; gene_name "Eif4e2"; transcript_biotype "protein_coding"
NC_000067.7	Novogene	exon	87147303	87147417	.	+	.	nearest_ref "XM_036165583.1"; exon_number "2"; gene_id "26987"; transcript_name "TCONS_00000316"; gene_biotype "protein_coding"; class_code "j"; transcript_id "TCONS_00000316"; gene_name "Eif4e2"; transcript_biotype "protein_coding"
NC_000067.7	Novogene	exon	87148642	87148776	.	+	.	nearest_ref "XM_036165583.1"; exon_number "3"; gene_id "26987"; transcript_name "TCONS_00000316"; gene_biotype "protein_coding"; class_code "j"; transcript_id "TCONS_00000316"; gene_name "Eif4e2"; transcript_biotype "protein_coding"
NC_000067.7	Novogene	exon	87152075	87152179	.	+	.	nearest_ref "XM_036165583.1"; exon_number "4"; gene_id "26987"; transcript_name "TCONS_00000316"; gene_biotype "protein_coding"; class_code "j"; transcript_id "TCONS_00000316"; gene_name "Eif4e2"; transcript_biotype "protein_coding"
NC_000067.7	Novogene	exon	87153572	87153724	.	+	.	nearest_ref "XM_036165583.1"; exon_number "5"; gene_id "26987"; transcript_name "TCONS_00000316"; gene_biotype "protein_coding"; class_code "j"; transcript_id "TCONS_00000316"; gene_name "Eif4e2"; transcript_biotype "protein_coding"
NC_000067.7	Novogene	exon	87153819	87153955	.	+	.	nearest_ref "XM_036165583.1"; exon_number "6"; gene_id "26987"; transcript_name "TCONS_00000316"; gene_biotype "protein_coding"; class_code "j"; transcript_id "TCONS_00000316"; gene_name "Eif4e2"; transcript_biotype "protein_coding"
NC_000067.7	Novogene	exon	87155523	87160203	.	+	.	nearest_ref "XM_036165583.1"; exon_number "7"; gene_id "26987"; transcript_name "TCONS_00000316"; gene_biotype "protein_coding"; class_code "j"; transcript_id "TCONS_00000316"; gene_name "Eif4e2"; transcript_biotype "protein_coding"
NC_000067.7	Novogene	exon	87165568	87167976	.	+	.	nearest_ref "XM_036165583.1"; exon_number "8"; gene_id "26987"; transcript_name "TCONS_00000316"; gene_biotype "protein_coding"; class_code "j"; transcript_id "TCONS_00000316"; gene_name "Eif4e2"; transcript_biotype "protein_coding"
NC_000067.7	Novogene	exon	89062189	89063330	.	+	.	nearest_ref "XM_030243887.2"; exon_number "1"; gene_id "98402"; transcript_name "TCONS_00000328"; gene_biotype "protein_coding"; class_code "j"; transcript_id "TCONS_00000328"; gene_name "Sh3bp4"; transcript_biotype "protein_coding"
NC_000067.7	Novogene	exon	89065281	89065525	.	+	.	nearest_ref "XM_030243887.2"; exon_number "2"; gene_id "98402"; transcript_name "TCONS_00000328"; gene_biotype "protein_coding"; class_code "j"; transcript_id "TCONS_00000328"; gene_name "Sh3bp4"; transcript_biotype "protein_coding"
NC_000067.7	Novogene	exon	89071272	89073628	.	+	.	nearest_ref "XM_030243887.2"; exon_number "3"; gene_id "98402"; transcript_name "TCONS_00000328"; gene_biotype "protein_coding"; class_code "j"; transcript_id "TCONS_00000328"; gene_name "Sh3bp4"; transcript_biotype "protein_coding"
NC_000067.7	Novogene	exon	89079922	89080110	.	+	.	nearest_ref "XM_030243887.2"; exon_number "4"; gene_id "98402"; transcript_name "TCONS_00000328"; gene_biotype "protein_coding"; class_code "j"; transcript_id "TCONS_00000328"; gene_name "Sh3bp4"; transcript_biotype "protein_coding"
NC_000067.7	Novogene	exon	89080849	89082809	.	+	.	nearest_ref "XM_030243887.2"; exon_number "5"; gene_id "98402"; transcript_name "TCONS_00000328"; gene_biotype "protein_coding"; class_code "j"; transcript_id "TCONS_00000328"; gene_name "Sh3bp4"; transcript_biotype "protein_coding"
NC_000067.7	Novogene	exon	89507202	89509375	.	+	.	nearest_ref "NM_178119.3"; exon_number "1"; gene_id "347722"; transcript_name "TCONS_00000331"; gene_biotype "protein_coding"; class_code "j"; transcript_id "TCONS_00000331"; gene_name "Agap1"; transcript_biotype "protein_coding"
NC_000067.7	Novogene	exon	89532320	89532378	.	+	.	nearest_ref "NM_178119.3"; exon_number "2"; gene_id "347722"; transcript_name "TCONS_00000331"; gene_biotype "protein_coding"; class_code "j"; transcript_id "TCONS_00000331"; gene_name "Agap1"; transcript_biotype "protein_coding"
NC_000067.7	Novogene	exon	89537218	89537305	.	+	.	nearest_ref "NM_178119.3"; exon_number "3"; gene_id "347722"; transcript_name "TCONS_00000331"; gene_biotype "protein_coding"; class_code "j"; transcript_id "TCONS_00000331"; gene_name "Agap1"; transcript_biotype "protein_coding"
NC_000067.7	Novogene	exon	89555483	89555568	.	+	.	nearest_ref "NM_178119.3"; exon_number "4"; gene_id "347722"; transcript_name "TCONS_00000331"; gene_biotype "protein_coding"; class_code "j"; transcript_id "TCONS_00000331"; gene_name "Agap1"; transcript_biotype "protein_coding"
NC_000067.7	Novogene	exon	89558110	89558251	.	+	.	nearest_ref "NM_178119.3"; exon_number "5"; gene_id "347722"; transcript_name "TCONS_00000331"; gene_biotype "protein_coding"; class_code "j"; transcript_id "TCONS_00000331"; gene_name "Agap1"; transcript_biotype "protein_coding"
NC_000067.7	Novogene	exon	89561882	89562016	.	+	.	nearest_ref "NM_178119.3"; exon_number "6"; gene_id "347722"; transcript_name "TCONS_00000331"; gene_biotype "protein_coding"; class_code "j"; transcript_id "TCONS_00000331"; gene_name "Agap1"; transcript_biotype "protein_coding"
NC_000067.7	Novogene	exon	89591383	89591510	.	+	.	nearest_ref "NM_178119.3"; exon_number "7"; gene_id "347722"; transcript_name "TCONS_00000331"; gene_biotype "protein_coding"; class_code "j"; transcript_id "TCONS_00000331"; gene_name "Agap1"; transcript_biotype "protein_coding"
NC_000067.7	Novogene	exon	89592756	89592911	.	+	.	nearest_ref "NM_178119.3"; exon_number "8"; gene_id "347722"; transcript_name "TCONS_00000331"; gene_biotype "protein_coding"; class_code "j"; transcript_id "TCONS_00000331"; gene_name "Agap1"; transcript_biotype "protein_coding"
NC_000067.7	Novogene	exon	89598901	89598993	.	+	.	nearest_ref "NM_178119.3"; exon_number "9"; gene_id "347722"; transcript_name "TCONS_00000331"; gene_biotype "protein_coding"; class_code "j"; transcript_id "TCONS_00000331"; gene_name "Agap1"; transcript_biotype "protein_coding"
NC_000067.7	Novogene	exon	89653683	89653787	.	+	.	nearest_ref "NM_178119.3"; exon_number "10"; gene_id "347722"; transcript_name "TCONS_00000331"; gene_biotype "protein_coding"; class_code "j"; transcript_id "TCONS_00000331"; gene_name "Agap1"; transcript_biotype "protein_coding"
NC_000067.7	Novogene	exon	89671450	89671618	.	+	.	nearest_ref "NM_178119.3"; exon_number "11"; gene_id "347722"; transcript_name "TCONS_00000331"; gene_biotype "protein_coding"; class_code "j"; transcript_id "TCONS_00000331"; gene_name "Agap1"; transcript_biotype "protein_coding"
NC_000067.7	Novogene	exon	89694028	89694186	.	+	.	nearest_ref "NM_178119.3"; exon_number "12"; gene_id "347722"; transcript_name "TCONS_00000331"; gene_biotype "protein_coding"; class_code "j"; transcript_id "TCONS_00000331"; gene_name "Agap1"; transcript_biotype "protein_coding"
NC_000067.7	Novogene	exon	89716885	89717046	.	+	.	nearest_ref "NM_178119.3"; exon_number "13"; gene_id "347722"; transcript_name "TCONS_00000331"; gene_biotype "protein_coding"; class_code "j"; transcript_id "TCONS_00000331"; gene_name "Agap1"; transcript_biotype "protein_coding"
NC_000067.7	Novogene	exon	89762156	89762310	.	+	.	nearest_ref "NM_178119.3"; exon_number "14"; gene_id "347722"; transcript_name "TCONS_00000331"; gene_biotype "protein_coding"; class_code "j"; transcript_id "TCONS_00000331"; gene_name "Agap1"; transcript_biotype "protein_coding"
NC_000067.7	Novogene	exon	89765434	89765524	.	+	.	nearest_ref "NM_178119.3"; exon_number "15"; gene_id "347722"; transcript_name "TCONS_00000331"; gene_biotype "protein_coding"; class_code "j"; transcript_id "TCONS_00000331"; gene_name "Agap1"; transcript_biotype "protein_coding"
NC_000067.7	Novogene	exon	89770743	89770965	.	+	.	nearest_ref "NM_178119.3"; exon_number "16"; gene_id "347722"; transcript_name "TCONS_00000331"; gene_biotype "protein_coding"; class_code "j"; transcript_id "TCONS_00000331"; gene_name "Agap1"; transcript_biotype "protein_coding"
NC_000067.7	Novogene	exon	89815228	89815483	.	+	.	nearest_ref "NM_178119.3"; exon_number "17"; gene_id "347722"; transcript_name "TCONS_00000331"; gene_biotype "protein_coding"; class_code "j"; transcript_id "TCONS_00000331"; gene_name "Agap1"; transcript_biotype "protein_coding"
NC_000067.7	Novogene	exon	89816413	89823004	.	+	.	nearest_ref "NM_178119.3"; exon_number "18"; gene_id "347722"; transcript_name "TCONS_00000331"; gene_biotype "protein_coding"; class_code "j"; transcript_id "TCONS_00000331"; gene_name "Agap1"; transcript_biotype "protein_coding"
NC_000067.7	Novogene	exon	89507440	89509375	.	+	.	nearest_ref "NM_178119.3"; exon_number "1"; gene_id "347722"; transcript_name "TCONS_00000332"; gene_biotype "protein_coding"; class_code "j"; transcript_id "TCONS_00000332"; gene_name "Agap1"; transcript_biotype "protein_coding"
NC_000067.7	Novogene	exon	89532320	89532378	.	+	.	nearest_ref "NM_178119.3"; exon_number "2"; gene_id "347722"; transcript_name "TCONS_00000332"; gene_biotype "protein_coding"; class_code "j"; transcript_id "TCONS_00000332"; gene_name "Agap1"; transcript_biotype "protein_coding"
NC_000067.7	Novogene	exon	89537218	89537305	.	+	.	nearest_ref "NM_178119.3"; exon_number "3"; gene_id "347722"; transcript_name "TCONS_00000332"; gene_biotype "protein_coding"; class_code "j"; transcript_id "TCONS_00000332"; gene_name "Agap1"; transcript_biotype "protein_coding"
NC_000067.7	Novogene	exon	89555483	89555568	.	+	.	nearest_ref "NM_178119.3"; exon_number "4"; gene_id "347722"; transcript_name "TCONS_00000332"; gene_biotype "protein_coding"; class_code "j"; transcript_id "TCONS_00000332"; gene_name "Agap1"; transcript_biotype "protein_coding"
NC_000067.7	Novogene	exon	89558110	89558251	.	+	.	nearest_ref "NM_178119.3"; exon_number "5"; gene_id "347722"; transcript_name "TCONS_00000332"; gene_biotype "protein_coding"; class_code "j"; transcript_id "TCONS_00000332"; gene_name "Agap1"; transcript_biotype "protein_coding"
NC_000067.7	Novogene	exon	89561882	89562016	.	+	.	nearest_ref "NM_178119.3"; exon_number "6"; gene_id "347722"; transcript_name "TCONS_00000332"; gene_biotype "protein_coding"; class_code "j"; transcript_id "TCONS_00000332"; gene_name "Agap1"; transcript_biotype "protein_coding"
NC_000067.7	Novogene	exon	89591383	89591510	.	+	.	nearest_ref "NM_178119.3"; exon_number "7"; gene_id "347722"; transcript_name "TCONS_00000332"; gene_biotype "protein_coding"; class_code "j"; transcript_id "TCONS_00000332"; gene_name "Agap1"; transcript_biotype "protein_coding"
NC_000067.7	Novogene	exon	89592756	89592911	.	+	.	nearest_ref "NM_178119.3"; exon_number "8"; gene_id "347722"; transcript_name "TCONS_00000332"; gene_biotype "protein_coding"; class_code "j"; transcript_id "TCONS_00000332"; gene_name "Agap1"; transcript_biotype "protein_coding"
NC_000067.7	Novogene	exon	89598901	89598993	.	+	.	nearest_ref "NM_178119.3"; exon_number "9"; gene_id "347722"; transcript_name "TCONS_00000332"; gene_biotype "protein_coding"; class_code "j"; transcript_id "TCONS_00000332"; gene_name "Agap1"; transcript_biotype "protein_coding"
NC_000067.7	Novogene	exon	89653683	89653787	.	+	.	nearest_ref "NM_178119.3"; exon_number "10"; gene_id "347722"; transcript_name "TCONS_00000332"; gene_biotype "protein_coding"; class_code "j"; transcript_id "TCONS_00000332"; gene_name "Agap1"; transcript_biotype "protein_coding"
NC_000067.7	Novogene	exon	89671450	89671618	.	+	.	nearest_ref "NM_178119.3"; exon_number "11"; gene_id "347722"; transcript_name "TCONS_00000332"; gene_biotype "protein_coding"; class_code "j"; transcript_id "TCONS_00000332"; gene_name "Agap1"; transcript_biotype "protein_coding"
NC_000067.7	Novogene	exon	89694028	89694186	.	+	.	nearest_ref "NM_178119.3"; exon_number "12"; gene_id "347722"; transcript_name "TCONS_00000332"; gene_biotype "protein_coding"; class_code "j"; transcript_id "TCONS_00000332"; gene_name "Agap1"; transcript_biotype "protein_coding"
NC_000067.7	Novogene	exon	89716885	89717046	.	+	.	nearest_ref "NM_178119.3"; exon_number "13"; gene_id "347722"; transcript_name "TCONS_00000332"; gene_biotype "protein_coding"; class_code "j"; transcript_id "TCONS_00000332"; gene_name "Agap1"; transcript_biotype "protein_coding"
NC_000067.7	Novogene	exon	89751579	89751656	.	+	.	nearest_ref "NM_178119.3"; exon_number "14"; gene_id "347722"; transcript_name "TCONS_00000332"; gene_biotype "protein_coding"; class_code "j"; transcript_id "TCONS_00000332"; gene_name "Agap1"; transcript_biotype "protein_coding"
NC_000067.7	Novogene	exon	89762156	89762310	.	+	.	nearest_ref "NM_178119.3"; exon_number "15"; gene_id "347722"; transcript_name "TCONS_00000332"; gene_biotype "protein_coding"; class_code "j"; transcript_id "TCONS_00000332"; gene_name "Agap1"; transcript_biotype "protein_coding"
NC_000067.7	Novogene	exon	89765434	89765524	.	+	.	nearest_ref "NM_178119.3"; exon_number "16"; gene_id "347722"; transcript_name "TCONS_00000332"; gene_biotype "protein_coding"; class_code "j"; transcript_id "TCONS_00000332"; gene_name "Agap1"; transcript_biotype "protein_coding"
NC_000067.7	Novogene	exon	89770743	89770965	.	+	.	nearest_ref "NM_178119.3"; exon_number "17"; gene_id "347722"; transcript_name "TCONS_00000332"; gene_biotype "protein_coding"; class_code "j"; transcript_id "TCONS_00000332"; gene_name "Agap1"; transcript_biotype "protein_coding"
NC_000067.7	Novogene	exon	89815228	89815483	.	+	.	nearest_ref "NM_178119.3"; exon_number "18"; gene_id "347722"; transcript_name "TCONS_00000332"; gene_biotype "protein_coding"; class_code "j"; transcript_id "TCONS_00000332"; gene_name "Agap1"; transcript_biotype "protein_coding"
NC_000067.7	Novogene	exon	89816413	89823004	.	+	.	nearest_ref "NM_178119.3"; exon_number "19"; gene_id "347722"; transcript_name "TCONS_00000332"; gene_biotype "protein_coding"; class_code "j"; transcript_id "TCONS_00000332"; gene_name "Agap1"; transcript_biotype "protein_coding"
NC_000067.7	Novogene	exon	89555309	89555568	.	+	.	nearest_ref "NM_178119.3"; exon_number "1"; gene_id "347722"; transcript_name "TCONS_00000333"; gene_biotype "protein_coding"; class_code "j"; transcript_id "TCONS_00000333"; gene_name "Agap1"; transcript_biotype "protein_coding"
NC_000067.7	Novogene	exon	89558110	89558251	.	+	.	nearest_ref "NM_178119.3"; exon_number "2"; gene_id "347722"; transcript_name "TCONS_00000333"; gene_biotype "protein_coding"; class_code "j"; transcript_id "TCONS_00000333"; gene_name "Agap1"; transcript_biotype "protein_coding"
NC_000067.7	Novogene	exon	89561882	89562016	.	+	.	nearest_ref "NM_178119.3"; exon_number "3"; gene_id "347722"; transcript_name "TCONS_00000333"; gene_biotype "protein_coding"; class_code "j"; transcript_id "TCONS_00000333"; gene_name "Agap1"; transcript_biotype "protein_coding"
NC_000067.7	Novogene	exon	89591383	89591510	.	+	.	nearest_ref "NM_178119.3"; exon_number "4"; gene_id "347722"; transcript_name "TCONS_00000333"; gene_biotype "protein_coding"; class_code "j"; transcript_id "TCONS_00000333"; gene_name "Agap1"; transcript_biotype "protein_coding"
NC_000067.7	Novogene	exon	89592756	89592911	.	+	.	nearest_ref "NM_178119.3"; exon_number "5"; gene_id "347722"; transcript_name "TCONS_00000333"; gene_biotype "protein_coding"; class_code "j"; transcript_id "TCONS_00000333"; gene_name "Agap1"; transcript_biotype "protein_coding"
NC_000067.7	Novogene	exon	89598901	89598993	.	+	.	nearest_ref "NM_178119.3"; exon_number "6"; gene_id "347722"; transcript_name "TCONS_00000333"; gene_biotype "protein_coding"; class_code "j"; transcript_id "TCONS_00000333"; gene_name "Agap1"; transcript_biotype "protein_coding"
NC_000067.7	Novogene	exon	89653683	89653787	.	+	.	nearest_ref "NM_178119.3"; exon_number "7"; gene_id "347722"; transcript_name "TCONS_00000333"; gene_biotype "protein_coding"; class_code "j"; transcript_id "TCONS_00000333"; gene_name "Agap1"; transcript_biotype "protein_coding"
NC_000067.7	Novogene	exon	89671450	89671618	.	+	.	nearest_ref "NM_178119.3"; exon_number "8"; gene_id "347722"; transcript_name "TCONS_00000333"; gene_biotype "protein_coding"; class_code "j"; transcript_id "TCONS_00000333"; gene_name "Agap1"; transcript_biotype "protein_coding"
NC_000067.7	Novogene	exon	89716885	89717046	.	+	.	nearest_ref "NM_178119.3"; exon_number "9"; gene_id "347722"; transcript_name "TCONS_00000333"; gene_biotype "protein_coding"; class_code "j"; transcript_id "TCONS_00000333"; gene_name "Agap1"; transcript_biotype "protein_coding"
NC_000067.7	Novogene	exon	89751579	89751656	.	+	.	nearest_ref "NM_178119.3"; exon_number "10"; gene_id "347722"; transcript_name "TCONS_00000333"; gene_biotype "protein_coding"; class_code "j"; transcript_id "TCONS_00000333"; gene_name "Agap1"; transcript_biotype "protein_coding"
NC_000067.7	Novogene	exon	89762156	89762310	.	+	.	nearest_ref "NM_178119.3"; exon_number "11"; gene_id "347722"; transcript_name "TCONS_00000333"; gene_biotype "protein_coding"; class_code "j"; transcript_id "TCONS_00000333"; gene_name "Agap1"; transcript_biotype "protein_coding"
NC_000067.7	Novogene	exon	89765434	89765524	.	+	.	nearest_ref "NM_178119.3"; exon_number "12"; gene_id "347722"; transcript_name "TCONS_00000333"; gene_biotype "protein_coding"; class_code "j"; transcript_id "TCONS_00000333"; gene_name "Agap1"; transcript_biotype "protein_coding"
NC_000067.7	Novogene	exon	89770743	89770965	.	+	.	nearest_ref "NM_178119.3"; exon_number "13"; gene_id "347722"; transcript_name "TCONS_00000333"; gene_biotype "protein_coding"; class_code "j"; transcript_id "TCONS_00000333"; gene_name "Agap1"; transcript_biotype "protein_coding"
NC_000067.7	Novogene	exon	89815228	89815483	.	+	.	nearest_ref "NM_178119.3"; exon_number "14"; gene_id "347722"; transcript_name "TCONS_00000333"; gene_biotype "protein_coding"; class_code "j"; transcript_id "TCONS_00000333"; gene_name "Agap1"; transcript_biotype "protein_coding"
NC_000067.7	Novogene	exon	89816413	89823004	.	+	.	nearest_ref "NM_178119.3"; exon_number "15"; gene_id "347722"; transcript_name "TCONS_00000333"; gene_biotype "protein_coding"; class_code "j"; transcript_id "TCONS_00000333"; gene_name "Agap1"; transcript_biotype "protein_coding"
NC_000067.7	Novogene	exon	90926449	90926615	.	+	.	nearest_ref "XR_004940657.1"; exon_number "1"; gene_id "16978"; transcript_name "TCONS_00000339"; gene_biotype "protein_coding"; class_code "j"; transcript_id "TCONS_00000339"; gene_name "Lrrfip1"; transcript_biotype "protein_coding"
NC_000067.7	Novogene	exon	90996285	90996371	.	+	.	nearest_ref "XR_004940657.1"; exon_number "2"; gene_id "16978"; transcript_name "TCONS_00000339"; gene_biotype "protein_coding"; class_code "j"; transcript_id "TCONS_00000339"; gene_name "Lrrfip1"; transcript_biotype "protein_coding"
NC_000067.7	Novogene	exon	91001046	91001063	.	+	.	nearest_ref "XR_004940657.1"; exon_number "3"; gene_id "16978"; transcript_name "TCONS_00000339"; gene_biotype "protein_coding"; class_code "j"; transcript_id "TCONS_00000339"; gene_name "Lrrfip1"; transcript_biotype "protein_coding"
NC_000067.7	Novogene	exon	91004666	91004713	.	+	.	nearest_ref "XR_004940657.1"; exon_number "4"; gene_id "16978"; transcript_name "TCONS_00000339"; gene_biotype "protein_coding"; class_code "j"; transcript_id "TCONS_00000339"; gene_name "Lrrfip1"; transcript_biotype "protein_coding"
NC_000067.7	Novogene	exon	91006113	91006157	.	+	.	nearest_ref "XR_004940657.1"; exon_number "5"; gene_id "16978"; transcript_name "TCONS_00000339"; gene_biotype "protein_coding"; class_code "j"; transcript_id "TCONS_00000339"; gene_name "Lrrfip1"; transcript_biotype "protein_coding"
NC_000067.7	Novogene	exon	91006753	91006803	.	+	.	nearest_ref "XR_004940657.1"; exon_number "6"; gene_id "16978"; transcript_name "TCONS_00000339"; gene_biotype "protein_coding"; class_code "j"; transcript_id "TCONS_00000339"; gene_name "Lrrfip1"; transcript_biotype "protein_coding"
NC_000067.7	Novogene	exon	91009863	91009901	.	+	.	nearest_ref "XR_004940657.1"; exon_number "7"; gene_id "16978"; transcript_name "TCONS_00000339"; gene_biotype "protein_coding"; class_code "j"; transcript_id "TCONS_00000339"; gene_name "Lrrfip1"; transcript_biotype "protein_coding"
NC_000067.7	Novogene	exon	91012668	91012727	.	+	.	nearest_ref "XR_004940657.1"; exon_number "8"; gene_id "16978"; transcript_name "TCONS_00000339"; gene_biotype "protein_coding"; class_code "j"; transcript_id "TCONS_00000339"; gene_name "Lrrfip1"; transcript_biotype "protein_coding"
NC_000067.7	Novogene	exon	91014781	91014846	.	+	.	nearest_ref "XR_004940657.1"; exon_number "9"; gene_id "16978"; transcript_name "TCONS_00000339"; gene_biotype "protein_coding"; class_code "j"; transcript_id "TCONS_00000339"; gene_name "Lrrfip1"; transcript_biotype "protein_coding"
NC_000067.7	Novogene	exon	91016356	91016433	.	+	.	nearest_ref "XR_004940657.1"; exon_number "10"; gene_id "16978"; transcript_name "TCONS_00000339"; gene_biotype "protein_coding"; class_code "j"; transcript_id "TCONS_00000339"; gene_name "Lrrfip1"; transcript_biotype "protein_coding"
NC_000067.7	Novogene	exon	91019324	91019389	.	+	.	nearest_ref "XR_004940657.1"; exon_number "11"; gene_id "16978"; transcript_name "TCONS_00000339"; gene_biotype "protein_coding"; class_code "j"; transcript_id "TCONS_00000339"; gene_name "Lrrfip1"; transcript_biotype "protein_coding"
NC_000067.7	Novogene	exon	91021282	91021359	.	+	.	nearest_ref "XR_004940657.1"; exon_number "12"; gene_id "16978"; transcript_name "TCONS_00000339"; gene_biotype "protein_coding"; class_code "j"; transcript_id "TCONS_00000339"; gene_name "Lrrfip1"; transcript_biotype "protein_coding"
NC_000067.7	Novogene	exon	91028299	91028334	.	+	.	nearest_ref "XR_004940657.1"; exon_number "13"; gene_id "16978"; transcript_name "TCONS_00000339"; gene_biotype "protein_coding"; class_code "j"; transcript_id "TCONS_00000339"; gene_name "Lrrfip1"; transcript_biotype "protein_coding"
NC_000067.7	Novogene	exon	91028907	91029032	.	+	.	nearest_ref "XR_004940657.1"; exon_number "14"; gene_id "16978"; transcript_name "TCONS_00000339"; gene_biotype "protein_coding"; class_code "j"; transcript_id "TCONS_00000339"; gene_name "Lrrfip1"; transcript_biotype "protein_coding"
NC_000067.7	Novogene	exon	91030969	91031040	.	+	.	nearest_ref "XR_004940657.1"; exon_number "15"; gene_id "16978"; transcript_name "TCONS_00000339"; gene_biotype "protein_coding"; class_code "j"; transcript_id "TCONS_00000339"; gene_name "Lrrfip1"; transcript_biotype "protein_coding"
NC_000067.7	Novogene	exon	91032849	91033019	.	+	.	nearest_ref "XR_004940657.1"; exon_number "16"; gene_id "16978"; transcript_name "TCONS_00000339"; gene_biotype "protein_coding"; class_code "j"; transcript_id "TCONS_00000339"; gene_name "Lrrfip1"; transcript_biotype "protein_coding"
NC_000067.7	Novogene	exon	91035020	91035112	.	+	.	nearest_ref "XR_004940657.1"; exon_number "17"; gene_id "16978"; transcript_name "TCONS_00000339"; gene_biotype "protein_coding"; class_code "j"; transcript_id "TCONS_00000339"; gene_name "Lrrfip1"; transcript_biotype "protein_coding"
NC_000067.7	Novogene	exon	91036302	91036394	.	+	.	nearest_ref "XR_004940657.1"; exon_number "18"; gene_id "16978"; transcript_name "TCONS_00000339"; gene_biotype "protein_coding"; class_code "j"; transcript_id "TCONS_00000339"; gene_name "Lrrfip1"; transcript_biotype "protein_coding"
NC_000067.7	Novogene	exon	91038077	91038169	.	+	.	nearest_ref "XR_004940657.1"; exon_number "19"; gene_id "16978"; transcript_name "TCONS_00000339"; gene_biotype "protein_coding"; class_code "j"; transcript_id "TCONS_00000339"; gene_name "Lrrfip1"; transcript_biotype "protein_coding"
NC_000067.7	Novogene	exon	91039878	91040019	.	+	.	nearest_ref "XR_004940657.1"; exon_number "20"; gene_id "16978"; transcript_name "TCONS_00000339"; gene_biotype "protein_coding"; class_code "j"; transcript_id "TCONS_00000339"; gene_name "Lrrfip1"; transcript_biotype "protein_coding"
NC_000067.7	Novogene	exon	91047863	91047912	.	+	.	nearest_ref "XR_004940657.1"; exon_number "21"; gene_id "16978"; transcript_name "TCONS_00000339"; gene_biotype "protein_coding"; class_code "j"; transcript_id "TCONS_00000339"; gene_name "Lrrfip1"; transcript_biotype "protein_coding"
NC_000067.7	Novogene	exon	91050144	91050261	.	+	.	nearest_ref "XR_004940657.1"; exon_number "22"; gene_id "16978"; transcript_name "TCONS_00000339"; gene_biotype "protein_coding"; class_code "j"; transcript_id "TCONS_00000339"; gene_name "Lrrfip1"; transcript_biotype "protein_coding"
NC_000067.7	Novogene	exon	91050800	91050879	.	+	.	nearest_ref "XR_004940657.1"; exon_number "23"; gene_id "16978"; transcript_name "TCONS_00000339"; gene_biotype "protein_coding"; class_code "j"; transcript_id "TCONS_00000339"; gene_name "Lrrfip1"; transcript_biotype "protein_coding"
NC_000067.7	Novogene	exon	91053363	91053467	.	+	.	nearest_ref "XR_004940657.1"; exon_number "24"; gene_id "16978"; transcript_name "TCONS_00000339"; gene_biotype "protein_coding"; class_code "j"; transcript_id "TCONS_00000339"; gene_name "Lrrfip1"; transcript_biotype "protein_coding"
NC_000067.7	Novogene	exon	91055808	91056666	.	+	.	nearest_ref "XR_004940657.1"; exon_number "25"; gene_id "16978"; transcript_name "TCONS_00000339"; gene_biotype "protein_coding"; class_code "j"; transcript_id "TCONS_00000339"; gene_name "Lrrfip1"; transcript_biotype "protein_coding"
NC_000067.7	Novogene	exon	90981166	90981445	.	+	.	nearest_ref "XR_004940657.1"; exon_number "1"; gene_id "16978"; transcript_name "TCONS_00000343"; gene_biotype "protein_coding"; class_code "j"; transcript_id "TCONS_00000343"; gene_name "Lrrfip1"; transcript_biotype "protein_coding"
NC_000067.7	Novogene	exon	90996285	90996371	.	+	.	nearest_ref "XR_004940657.1"; exon_number "2"; gene_id "16978"; transcript_name "TCONS_00000343"; gene_biotype "protein_coding"; class_code "j"; transcript_id "TCONS_00000343"; gene_name "Lrrfip1"; transcript_biotype "protein_coding"
NC_000067.7	Novogene	exon	91001046	91012727	.	+	.	nearest_ref "XR_004940657.1"; exon_number "3"; gene_id "16978"; transcript_name "TCONS_00000343"; gene_biotype "protein_coding"; class_code "j"; transcript_id "TCONS_00000343"; gene_name "Lrrfip1"; transcript_biotype "protein_coding"
NC_000067.7	Novogene	exon	91014781	91014846	.	+	.	nearest_ref "XR_004940657.1"; exon_number "4"; gene_id "16978"; transcript_name "TCONS_00000343"; gene_biotype "protein_coding"; class_code "j"; transcript_id "TCONS_00000343"; gene_name "Lrrfip1"; transcript_biotype "protein_coding"
NC_000067.7	Novogene	exon	91016356	91016433	.	+	.	nearest_ref "XR_004940657.1"; exon_number "5"; gene_id "16978"; transcript_name "TCONS_00000343"; gene_biotype "protein_coding"; class_code "j"; transcript_id "TCONS_00000343"; gene_name "Lrrfip1"; transcript_biotype "protein_coding"
NC_000067.7	Novogene	exon	91018177	91018221	.	+	.	nearest_ref "XR_004940657.1"; exon_number "6"; gene_id "16978"; transcript_name "TCONS_00000343"; gene_biotype "protein_coding"; class_code "j"; transcript_id "TCONS_00000343"; gene_name "Lrrfip1"; transcript_biotype "protein_coding"
NC_000067.7	Novogene	exon	91019324	91019389	.	+	.	nearest_ref "XR_004940657.1"; exon_number "7"; gene_id "16978"; transcript_name "TCONS_00000343"; gene_biotype "protein_coding"; class_code "j"; transcript_id "TCONS_00000343"; gene_name "Lrrfip1"; transcript_biotype "protein_coding"
NC_000067.7	Novogene	exon	91021282	91021359	.	+	.	nearest_ref "XR_004940657.1"; exon_number "8"; gene_id "16978"; transcript_name "TCONS_00000343"; gene_biotype "protein_coding"; class_code "j"; transcript_id "TCONS_00000343"; gene_name "Lrrfip1"; transcript_biotype "protein_coding"
NC_000067.7	Novogene	exon	91028299	91028334	.	+	.	nearest_ref "XR_004940657.1"; exon_number "9"; gene_id "16978"; transcript_name "TCONS_00000343"; gene_biotype "protein_coding"; class_code "j"; transcript_id "TCONS_00000343"; gene_name "Lrrfip1"; transcript_biotype "protein_coding"
NC_000067.7	Novogene	exon	91028907	91029032	.	+	.	nearest_ref "XR_004940657.1"; exon_number "10"; gene_id "16978"; transcript_name "TCONS_00000343"; gene_biotype "protein_coding"; class_code "j"; transcript_id "TCONS_00000343"; gene_name "Lrrfip1"; transcript_biotype "protein_coding"
NC_000067.7	Novogene	exon	91030969	91031040	.	+	.	nearest_ref "XR_004940657.1"; exon_number "11"; gene_id "16978"; transcript_name "TCONS_00000343"; gene_biotype "protein_coding"; class_code "j"; transcript_id "TCONS_00000343"; gene_name "Lrrfip1"; transcript_biotype "protein_coding"
NC_000067.7	Novogene	exon	91032849	91033019	.	+	.	nearest_ref "XR_004940657.1"; exon_number "12"; gene_id "16978"; transcript_name "TCONS_00000343"; gene_biotype "protein_coding"; class_code "j"; transcript_id "TCONS_00000343"; gene_name "Lrrfip1"; transcript_biotype "protein_coding"
NC_000067.7	Novogene	exon	91035020	91035112	.	+	.	nearest_ref "XR_004940657.1"; exon_number "13"; gene_id "16978"; transcript_name "TCONS_00000343"; gene_biotype "protein_coding"; class_code "j"; transcript_id "TCONS_00000343"; gene_name "Lrrfip1"; transcript_biotype "protein_coding"
NC_000067.7	Novogene	exon	91039878	91040019	.	+	.	nearest_ref "XR_004940657.1"; exon_number "14"; gene_id "16978"; transcript_name "TCONS_00000343"; gene_biotype "protein_coding"; class_code "j"; transcript_id "TCONS_00000343"; gene_name "Lrrfip1"; transcript_biotype "protein_coding"
NC_000067.7	Novogene	exon	91047863	91047912	.	+	.	nearest_ref "XR_004940657.1"; exon_number "15"; gene_id "16978"; transcript_name "TCONS_00000343"; gene_biotype "protein_coding"; class_code "j"; transcript_id "TCONS_00000343"; gene_name "Lrrfip1"; transcript_biotype "protein_coding"
NC_000067.7	Novogene	exon	91050144	91050261	.	+	.	nearest_ref "XR_004940657.1"; exon_number "16"; gene_id "16978"; transcript_name "TCONS_00000343"; gene_biotype "protein_coding"; class_code "j"; transcript_id "TCONS_00000343"; gene_name "Lrrfip1"; transcript_biotype "protein_coding"
NC_000067.7	Novogene	exon	91050800	91050879	.	+	.	nearest_ref "XR_004940657.1"; exon_number "17"; gene_id "16978"; transcript_name "TCONS_00000343"; gene_biotype "protein_coding"; class_code "j"; transcript_id "TCONS_00000343"; gene_name "Lrrfip1"; transcript_biotype "protein_coding"
NC_000067.7	Novogene	exon	91053363	91053467	.	+	.	nearest_ref "XR_004940657.1"; exon_number "18"; gene_id "16978"; transcript_name "TCONS_00000343"; gene_biotype "protein_coding"; class_code "j"; transcript_id "TCONS_00000343"; gene_name "Lrrfip1"; transcript_biotype "protein_coding"
NC_000067.7	Novogene	exon	91055808	91056666	.	+	.	nearest_ref "XR_004940657.1"; exon_number "19"; gene_id "16978"; transcript_name "TCONS_00000343"; gene_biotype "protein_coding"; class_code "j"; transcript_id "TCONS_00000343"; gene_name "Lrrfip1"; transcript_biotype "protein_coding"
NC_000067.7	Novogene	exon	90981166	90981445	.	+	.	nearest_ref "XR_004940657.1"; exon_number "1"; gene_id "16978"; transcript_name "TCONS_00000342"; gene_biotype "protein_coding"; class_code "j"; transcript_id "TCONS_00000342"; gene_name "Lrrfip1"; transcript_biotype "protein_coding"
NC_000067.7	Novogene	exon	90996285	90996371	.	+	.	nearest_ref "XR_004940657.1"; exon_number "2"; gene_id "16978"; transcript_name "TCONS_00000342"; gene_biotype "protein_coding"; class_code "j"; transcript_id "TCONS_00000342"; gene_name "Lrrfip1"; transcript_biotype "protein_coding"
NC_000067.7	Novogene	exon	91001046	91009901	.	+	.	nearest_ref "XR_004940657.1"; exon_number "3"; gene_id "16978"; transcript_name "TCONS_00000342"; gene_biotype "protein_coding"; class_code "j"; transcript_id "TCONS_00000342"; gene_name "Lrrfip1"; transcript_biotype "protein_coding"
NC_000067.7	Novogene	exon	91012668	91012727	.	+	.	nearest_ref "XR_004940657.1"; exon_number "4"; gene_id "16978"; transcript_name "TCONS_00000342"; gene_biotype "protein_coding"; class_code "j"; transcript_id "TCONS_00000342"; gene_name "Lrrfip1"; transcript_biotype "protein_coding"
NC_000067.7	Novogene	exon	91014781	91014846	.	+	.	nearest_ref "XR_004940657.1"; exon_number "5"; gene_id "16978"; transcript_name "TCONS_00000342"; gene_biotype "protein_coding"; class_code "j"; transcript_id "TCONS_00000342"; gene_name "Lrrfip1"; transcript_biotype "protein_coding"
NC_000067.7	Novogene	exon	91016356	91016433	.	+	.	nearest_ref "XR_004940657.1"; exon_number "6"; gene_id "16978"; transcript_name "TCONS_00000342"; gene_biotype "protein_coding"; class_code "j"; transcript_id "TCONS_00000342"; gene_name "Lrrfip1"; transcript_biotype "protein_coding"
NC_000067.7	Novogene	exon	91018177	91019389	.	+	.	nearest_ref "XR_004940657.1"; exon_number "7"; gene_id "16978"; transcript_name "TCONS_00000342"; gene_biotype "protein_coding"; class_code "j"; transcript_id "TCONS_00000342"; gene_name "Lrrfip1"; transcript_biotype "protein_coding"
NC_000067.7	Novogene	exon	91021282	91021359	.	+	.	nearest_ref "XR_004940657.1"; exon_number "8"; gene_id "16978"; transcript_name "TCONS_00000342"; gene_biotype "protein_coding"; class_code "j"; transcript_id "TCONS_00000342"; gene_name "Lrrfip1"; transcript_biotype "protein_coding"
NC_000067.7	Novogene	exon	91028299	91028334	.	+	.	nearest_ref "XR_004940657.1"; exon_number "9"; gene_id "16978"; transcript_name "TCONS_00000342"; gene_biotype "protein_coding"; class_code "j"; transcript_id "TCONS_00000342"; gene_name "Lrrfip1"; transcript_biotype "protein_coding"
NC_000067.7	Novogene	exon	91028907	91029032	.	+	.	nearest_ref "XR_004940657.1"; exon_number "10"; gene_id "16978"; transcript_name "TCONS_00000342"; gene_biotype "protein_coding"; class_code "j"; transcript_id "TCONS_00000342"; gene_name "Lrrfip1"; transcript_biotype "protein_coding"
NC_000067.7	Novogene	exon	91030969	91031040	.	+	.	nearest_ref "XR_004940657.1"; exon_number "11"; gene_id "16978"; transcript_name "TCONS_00000342"; gene_biotype "protein_coding"; class_code "j"; transcript_id "TCONS_00000342"; gene_name "Lrrfip1"; transcript_biotype "protein_coding"
NC_000067.7	Novogene	exon	91032849	91033019	.	+	.	nearest_ref "XR_004940657.1"; exon_number "12"; gene_id "16978"; transcript_name "TCONS_00000342"; gene_biotype "protein_coding"; class_code "j"; transcript_id "TCONS_00000342"; gene_name "Lrrfip1"; transcript_biotype "protein_coding"
NC_000067.7	Novogene	exon	91035020	91035112	.	+	.	nearest_ref "XR_004940657.1"; exon_number "13"; gene_id "16978"; transcript_name "TCONS_00000342"; gene_biotype "protein_coding"; class_code "j"; transcript_id "TCONS_00000342"; gene_name "Lrrfip1"; transcript_biotype "protein_coding"
NC_000067.7	Novogene	exon	91036302	91038169	.	+	.	nearest_ref "XR_004940657.1"; exon_number "14"; gene_id "16978"; transcript_name "TCONS_00000342"; gene_biotype "protein_coding"; class_code "j"; transcript_id "TCONS_00000342"; gene_name "Lrrfip1"; transcript_biotype "protein_coding"
NC_000067.7	Novogene	exon	91039878	91040019	.	+	.	nearest_ref "XR_004940657.1"; exon_number "15"; gene_id "16978"; transcript_name "TCONS_00000342"; gene_biotype "protein_coding"; class_code "j"; transcript_id "TCONS_00000342"; gene_name "Lrrfip1"; transcript_biotype "protein_coding"
NC_000067.7	Novogene	exon	91047863	91047912	.	+	.	nearest_ref "XR_004940657.1"; exon_number "16"; gene_id "16978"; transcript_name "TCONS_00000342"; gene_biotype "protein_coding"; class_code "j"; transcript_id "TCONS_00000342"; gene_name "Lrrfip1"; transcript_biotype "protein_coding"
NC_000067.7	Novogene	exon	91050144	91050261	.	+	.	nearest_ref "XR_004940657.1"; exon_number "17"; gene_id "16978"; transcript_name "TCONS_00000342"; gene_biotype "protein_coding"; class_code "j"; transcript_id "TCONS_00000342"; gene_name "Lrrfip1"; transcript_biotype "protein_coding"
NC_000067.7	Novogene	exon	91050800	91050879	.	+	.	nearest_ref "XR_004940657.1"; exon_number "18"; gene_id "16978"; transcript_name "TCONS_00000342"; gene_biotype "protein_coding"; class_code "j"; transcript_id "TCONS_00000342"; gene_name "Lrrfip1"; transcript_biotype "protein_coding"
NC_000067.7	Novogene	exon	91053363	91053467	.	+	.	nearest_ref "XR_004940657.1"; exon_number "19"; gene_id "16978"; transcript_name "TCONS_00000342"; gene_biotype "protein_coding"; class_code "j"; transcript_id "TCONS_00000342"; gene_name "Lrrfip1"; transcript_biotype "protein_coding"
NC_000067.7	Novogene	exon	91055808	91056666	.	+	.	nearest_ref "XR_004940657.1"; exon_number "20"; gene_id "16978"; transcript_name "TCONS_00000342"; gene_biotype "protein_coding"; class_code "j"; transcript_id "TCONS_00000342"; gene_name "Lrrfip1"; transcript_biotype "protein_coding"
NC_000067.7	Novogene	exon	91468287	91468586	.	+	.	nearest_ref "NM_001039126.2"; exon_number "1"; gene_id "65247"; transcript_name "TCONS_00000352"; gene_biotype "protein_coding"; class_code "j"; transcript_id "TCONS_00000352"; gene_name "Asb1"; transcript_biotype "protein_coding"
NC_000067.7	Novogene	exon	91471873	91472019	.	+	.	nearest_ref "NM_001039126.2"; exon_number "2"; gene_id "65247"; transcript_name "TCONS_00000352"; gene_biotype "protein_coding"; class_code "j"; transcript_id "TCONS_00000352"; gene_name "Asb1"; transcript_biotype "protein_coding"
NC_000067.7	Novogene	exon	91474650	91474952	.	+	.	nearest_ref "NM_001039126.2"; exon_number "3"; gene_id "65247"; transcript_name "TCONS_00000352"; gene_biotype "protein_coding"; class_code "j"; transcript_id "TCONS_00000352"; gene_name "Asb1"; transcript_biotype "protein_coding"
NC_000067.7	Novogene	exon	91479776	91480161	.	+	.	nearest_ref "NM_001039126.2"; exon_number "4"; gene_id "65247"; transcript_name "TCONS_00000352"; gene_biotype "protein_coding"; class_code "j"; transcript_id "TCONS_00000352"; gene_name "Asb1"; transcript_biotype "protein_coding"
NC_000067.7	Novogene	exon	91482473	91487312	.	+	.	nearest_ref "NM_001039126.2"; exon_number "5"; gene_id "65247"; transcript_name "TCONS_00000352"; gene_biotype "protein_coding"; class_code "j"; transcript_id "TCONS_00000352"; gene_name "Asb1"; transcript_biotype "protein_coding"
NC_000067.7	Novogene	exon	93333662	93335981	.	+	.	nearest_ref "XM_006529241.3"; exon_number "1"; gene_id "18000"; transcript_name "TCONS_00000360"; gene_biotype "protein_coding"; class_code "j"; transcript_id "TCONS_00000360"; gene_name "Septin2"; transcript_biotype "protein_coding"
NC_000067.7	Novogene	exon	93336091	93336219	.	+	.	nearest_ref "XM_006529241.3"; exon_number "2"; gene_id "18000"; transcript_name "TCONS_00000360"; gene_biotype "protein_coding"; class_code "j"; transcript_id "TCONS_00000360"; gene_name "Septin2"; transcript_biotype "protein_coding"
NC_000067.7	Novogene	exon	93336411	93336527	.	+	.	nearest_ref "XM_006529241.3"; exon_number "3"; gene_id "18000"; transcript_name "TCONS_00000360"; gene_biotype "protein_coding"; class_code "j"; transcript_id "TCONS_00000360"; gene_name "Septin2"; transcript_biotype "protein_coding"
NC_000067.7	Novogene	exon	93336673	93336858	.	+	.	nearest_ref "XM_006529241.3"; exon_number "4"; gene_id "18000"; transcript_name "TCONS_00000360"; gene_biotype "protein_coding"; class_code "j"; transcript_id "TCONS_00000360"; gene_name "Septin2"; transcript_biotype "protein_coding"
NC_000067.7	Novogene	exon	93340085	93340228	.	+	.	nearest_ref "XM_006529241.3"; exon_number "5"; gene_id "18000"; transcript_name "TCONS_00000360"; gene_biotype "protein_coding"; class_code "j"; transcript_id "TCONS_00000360"; gene_name "Septin2"; transcript_biotype "protein_coding"
NC_000067.7	Novogene	exon	93341213	93341347	.	+	.	nearest_ref "XM_006529241.3"; exon_number "6"; gene_id "18000"; transcript_name "TCONS_00000360"; gene_biotype "protein_coding"; class_code "j"; transcript_id "TCONS_00000360"; gene_name "Septin2"; transcript_biotype "protein_coding"
NC_000067.7	Novogene	exon	93341549	93341653	.	+	.	nearest_ref "XM_006529241.3"; exon_number "7"; gene_id "18000"; transcript_name "TCONS_00000360"; gene_biotype "protein_coding"; class_code "j"; transcript_id "TCONS_00000360"; gene_name "Septin2"; transcript_biotype "protein_coding"
NC_000067.7	Novogene	exon	93342534	93342688	.	+	.	nearest_ref "XM_006529241.3"; exon_number "8"; gene_id "18000"; transcript_name "TCONS_00000360"; gene_biotype "protein_coding"; class_code "j"; transcript_id "TCONS_00000360"; gene_name "Septin2"; transcript_biotype "protein_coding"
NC_000067.7	Novogene	exon	93344223	93344361	.	+	.	nearest_ref "XM_006529241.3"; exon_number "9"; gene_id "18000"; transcript_name "TCONS_00000360"; gene_biotype "protein_coding"; class_code "j"; transcript_id "TCONS_00000360"; gene_name "Septin2"; transcript_biotype "protein_coding"
NC_000067.7	Novogene	exon	93344894	93345112	.	+	.	nearest_ref "XM_006529241.3"; exon_number "10"; gene_id "18000"; transcript_name "TCONS_00000360"; gene_biotype "protein_coding"; class_code "j"; transcript_id "TCONS_00000360"; gene_name "Septin2"; transcript_biotype "protein_coding"
NC_000067.7	Novogene	exon	93345190	93345411	.	+	.	nearest_ref "XM_006529241.3"; exon_number "11"; gene_id "18000"; transcript_name "TCONS_00000360"; gene_biotype "protein_coding"; class_code "j"; transcript_id "TCONS_00000360"; gene_name "Septin2"; transcript_biotype "protein_coding"
NC_000067.7	Novogene	exon	93347791	93348009	.	+	.	nearest_ref "XM_006529241.3"; exon_number "12"; gene_id "18000"; transcript_name "TCONS_00000360"; gene_biotype "protein_coding"; class_code "j"; transcript_id "TCONS_00000360"; gene_name "Septin2"; transcript_biotype "protein_coding"
NC_000067.7	Novogene	exon	93348806	93348937	.	+	.	nearest_ref "XM_006529241.3"; exon_number "13"; gene_id "18000"; transcript_name "TCONS_00000360"; gene_biotype "protein_coding"; class_code "j"; transcript_id "TCONS_00000360"; gene_name "Septin2"; transcript_biotype "protein_coding"
NC_000067.7	Novogene	exon	93349065	93349151	.	+	.	nearest_ref "XM_006529241.3"; exon_number "14"; gene_id "18000"; transcript_name "TCONS_00000360"; gene_biotype "protein_coding"; class_code "j"; transcript_id "TCONS_00000360"; gene_name "Septin2"; transcript_biotype "protein_coding"
NC_000067.7	Novogene	exon	93350986	93351099	.	+	.	nearest_ref "XM_006529241.3"; exon_number "15"; gene_id "18000"; transcript_name "TCONS_00000360"; gene_biotype "protein_coding"; class_code "j"; transcript_id "TCONS_00000360"; gene_name "Septin2"; transcript_biotype "protein_coding"
NC_000067.7	Novogene	exon	93351492	93351596	.	+	.	nearest_ref "XM_006529241.3"; exon_number "16"; gene_id "18000"; transcript_name "TCONS_00000360"; gene_biotype "protein_coding"; class_code "j"; transcript_id "TCONS_00000360"; gene_name "Septin2"; transcript_biotype "protein_coding"
NC_000067.7	Novogene	exon	93352989	93353128	.	+	.	nearest_ref "XM_006529241.3"; exon_number "17"; gene_id "18000"; transcript_name "TCONS_00000360"; gene_biotype "protein_coding"; class_code "j"; transcript_id "TCONS_00000360"; gene_name "Septin2"; transcript_biotype "protein_coding"
NC_000067.7	Novogene	exon	93355280	93355358	.	+	.	nearest_ref "XM_006529241.3"; exon_number "18"; gene_id "18000"; transcript_name "TCONS_00000360"; gene_biotype "protein_coding"; class_code "j"; transcript_id "TCONS_00000360"; gene_name "Septin2"; transcript_biotype "protein_coding"
NC_000067.7	Novogene	exon	93355870	93355974	.	+	.	nearest_ref "XM_006529241.3"; exon_number "19"; gene_id "18000"; transcript_name "TCONS_00000360"; gene_biotype "protein_coding"; class_code "j"; transcript_id "TCONS_00000360"; gene_name "Septin2"; transcript_biotype "protein_coding"
NC_000067.7	Novogene	exon	93357100	93357207	.	+	.	nearest_ref "XM_006529241.3"; exon_number "20"; gene_id "18000"; transcript_name "TCONS_00000360"; gene_biotype "protein_coding"; class_code "j"; transcript_id "TCONS_00000360"; gene_name "Septin2"; transcript_biotype "protein_coding"
NC_000067.7	Novogene	exon	93357820	93358026	.	+	.	nearest_ref "XM_006529241.3"; exon_number "21"; gene_id "18000"; transcript_name "TCONS_00000360"; gene_biotype "protein_coding"; class_code "j"; transcript_id "TCONS_00000360"; gene_name "Septin2"; transcript_biotype "protein_coding"
NC_000067.7	Novogene	exon	93358677	93358892	.	+	.	nearest_ref "XM_006529241.3"; exon_number "22"; gene_id "18000"; transcript_name "TCONS_00000360"; gene_biotype "protein_coding"; class_code "j"; transcript_id "TCONS_00000360"; gene_name "Septin2"; transcript_biotype "protein_coding"
NC_000067.7	Novogene	exon	93359034	93359240	.	+	.	nearest_ref "XM_006529241.3"; exon_number "23"; gene_id "18000"; transcript_name "TCONS_00000360"; gene_biotype "protein_coding"; class_code "j"; transcript_id "TCONS_00000360"; gene_name "Septin2"; transcript_biotype "protein_coding"
NC_000067.7	Novogene	exon	93364816	93365031	.	+	.	nearest_ref "XM_006529241.3"; exon_number "24"; gene_id "18000"; transcript_name "TCONS_00000360"; gene_biotype "protein_coding"; class_code "j"; transcript_id "TCONS_00000360"; gene_name "Septin2"; transcript_biotype "protein_coding"
NC_000067.7	Novogene	exon	93365948	93366105	.	+	.	nearest_ref "XM_006529241.3"; exon_number "25"; gene_id "18000"; transcript_name "TCONS_00000360"; gene_biotype "protein_coding"; class_code "j"; transcript_id "TCONS_00000360"; gene_name "Septin2"; transcript_biotype "protein_coding"
NC_000067.7	Novogene	exon	93368402	93368514	.	+	.	nearest_ref "XM_006529241.3"; exon_number "26"; gene_id "18000"; transcript_name "TCONS_00000360"; gene_biotype "protein_coding"; class_code "j"; transcript_id "TCONS_00000360"; gene_name "Septin2"; transcript_biotype "protein_coding"
NC_000067.7	Novogene	exon	93369908	93369972	.	+	.	nearest_ref "XM_006529241.3"; exon_number "27"; gene_id "18000"; transcript_name "TCONS_00000360"; gene_biotype "protein_coding"; class_code "j"; transcript_id "TCONS_00000360"; gene_name "Septin2"; transcript_biotype "protein_coding"
NC_000067.7	Novogene	exon	93406435	93406790	.	+	.	nearest_ref "XM_006529241.3"; exon_number "28"; gene_id "18000"; transcript_name "TCONS_00000360"; gene_biotype "protein_coding"; class_code "j"; transcript_id "TCONS_00000360"; gene_name "Septin2"; transcript_biotype "protein_coding"
NC_000067.7	Novogene	exon	93416846	93416876	.	+	.	nearest_ref "XM_006529241.3"; exon_number "29"; gene_id "18000"; transcript_name "TCONS_00000360"; gene_biotype "protein_coding"; class_code "j"; transcript_id "TCONS_00000360"; gene_name "Septin2"; transcript_biotype "protein_coding"
NC_000067.7	Novogene	exon	93418879	93418999	.	+	.	nearest_ref "XM_006529241.3"; exon_number "30"; gene_id "18000"; transcript_name "TCONS_00000360"; gene_biotype "protein_coding"; class_code "j"; transcript_id "TCONS_00000360"; gene_name "Septin2"; transcript_biotype "protein_coding"
NC_000067.7	Novogene	exon	93423301	93423387	.	+	.	nearest_ref "XM_006529241.3"; exon_number "31"; gene_id "18000"; transcript_name "TCONS_00000360"; gene_biotype "protein_coding"; class_code "j"; transcript_id "TCONS_00000360"; gene_name "Septin2"; transcript_biotype "protein_coding"
NC_000067.7	Novogene	exon	93425063	93425186	.	+	.	nearest_ref "XM_006529241.3"; exon_number "32"; gene_id "18000"; transcript_name "TCONS_00000360"; gene_biotype "protein_coding"; class_code "j"; transcript_id "TCONS_00000360"; gene_name "Septin2"; transcript_biotype "protein_coding"
[truncated: 80,635 more rows]
