# Supplementary material for: Novel Transcriptomic Interactomes of Noncoding RNAs in the Heart under Altered Thyroid Hormonal States
Source: Int J Mol Sci. 2023 Mar 31;24(7):6560. doi: 10.3390/ijms24076560 (PMC10095585; doi:10.3390/ijms24076560)
Supplement: Supplementary file 1 [file ijms-24-06560-s001.zip › Supplemental File S11 DEA mRNA.xlsx]

## Sheet: HypoTH vs Control
Transcript	HypoTH GROUP value	Control GROUP value	log2foldchange	pvalue	qvalue	significance	gene_id	gene_name	gene_description
XM_030249575.2	3.59523	0	Inf	2.05e-05	0.0155632	TRUE	18607	Pdpk1	Pdpk1		Upregulated
NM_008653.2	367.999	0	Inf	2.16e-05	0.0155632	TRUE	17868	Mybpc3	Mybpc3		Downregulated
XM_036161610.1	3.11512	0	Inf	2.35e-05	0.0155632	TRUE	27360	Add3	Add3
NM_008484.2	2.26838	0	Inf	2.5e-05	0.0155632	TRUE	16780	Lamb3	Lamb3
NM_001362722.1	26.0163	0	Inf	2.74e-05	0.0155632	TRUE	74103	Nebl	Nebl
TCONS_00012153	32.7855	0	Inf	2.77e-05	0.0155632	TRUE	76808	Rpl18a	Rpl18a
TCONS_00011889	3.80413	0	Inf	3.51e-05	0.0155632	TRUE	16337	Insr	Insr
TCONS_00003025	14.206	0	Inf	3.59e-05	0.0155632	TRUE	50915	Grb14	Grb14
XM_036157952.1	3.05654	0	Inf	5.87e-05	0.0211184	TRUE	12908	Crat	Crat
NM_001310464.1	1.91056	0	Inf	9.66e-05	0.0264941	TRUE	19699	Reln	Reln
NM_001361607.1	323.831	0	Inf	0.00010199	0.0273144	TRUE	140781	Myh7	Myh7
XM_036161439.1	3.29743	0	Inf	0.000145308	0.0276354	TRUE	14773	Grk5	Grk5
XM_036157326.1	1.99876	0	Inf	0.000157757	0.0276354	TRUE	217708	Lin52	Lin52
XR_867569.1	5.43055	0	Inf	0.000162748	0.0276354	TRUE	105244531	Gm40124	Gm40124
TCONS_00000691	2.74831	0	Inf	0.00022582	0.0276354	TRUE	320404	Itpkb	Itpkb
XM_030255147.2	1.79149	0	Inf	0.000233871	0.0276354	TRUE	381290	Atp2b4	Atp2b4
XM_006500037.5	2.85713	0	Inf	0.000277181	0.0276354	TRUE	66860	Tanc1	Tanc1
NM_001379411.1	2.31534	0	Inf	0.000343337	0.0276354	TRUE	224705	Vps52	Vps52
NM_177059.3	2.66003	0	Inf	0.00041668	0.0276354	TRUE	320027	Fstl4	Fstl4
XM_036165700.1	6.46645	0	Inf	0.000569122	0.0276354	TRUE	320404	Itpkb	Itpkb
XM_006534320.4	1.80638	0	Inf	0.000587108	0.0276354	TRUE	72729	Cdc42se2	Cdc42se2
XM_036165918.1	1.40394	0	Inf	0.000652152	0.0276354	TRUE	18139	Zfp638	Zfp638
XM_036156454.1	1.04576	0	Inf	0.000756013	0.0276354	TRUE	19345	Rab5c	Rab5c
XM_006540663.4	1.1616	0	Inf	0.000774626	0.0276354	TRUE	16514	Kcnj11	Kcnj11
XM_030250691.1	0.855732	0	Inf	0.000781997	0.0276354	TRUE	107351	Kank1	Kank1
XM_036159410.1	0.953554	0	Inf	0.000794675	0.0276354	TRUE	23970	Pacsin2	Pacsin2
TCONS_00001243	3.03869	0	Inf	0.000820671	0.0276354	TRUE	70579	Zc3h11a	Zc3h11a
TCONS_00001258	1.45639	0	Inf	0.000820671	0.0276354	TRUE	116847	Prelp	Prelp
TCONS_00001310	5.00249	0	Inf	0.000820671	0.0276354	TRUE	12628	Cfh	Cfh
NM_001039512.1	5.9554	0	Inf	0.000820671	0.0276354	TRUE	117198	Ivns1abp	Ivns1abp
TCONS_00000706	1.33078	0	Inf	0.000820671	0.0276354	TRUE	115487219	Gm51706	Gm51706
TCONS_00002717	0.914943	0	Inf	0.000820671	0.0276354	TRUE	14007	Celf2	Celf2
TCONS_00002822	1.95082	0	Inf	0.000820671	0.0276354	TRUE	67512	Agpat2	Agpat2
XM_006497825.4	1.1796	0	Inf	0.000820671	0.0276354	TRUE	20930	Surf1	Surf1
XM_011239446.4	3.2763	0	Inf	0.000820671	0.0276354	TRUE	228026	Pdk1	Pdk1
XM_030251887.2	1.47289	0	Inf	0.000820671	0.0276354	TRUE	54485	Dll4	Dll4
TCONS_00003435	14.8919	0	Inf	0.000820671	0.0276354	TRUE	13010	Cst3	Cst3
TCONS_00002486	1.18122	0	Inf	0.000820671	0.0276354	TRUE	68295	Aar2	Aar2
XM_030250848.1	1.08784	0	Inf	0.000820671	0.0276354	TRUE	228998	Arfgap1	Arfgap1
TCONS_00004800	1.0568	0	Inf	0.000820671	0.0276354	TRUE	118449	Synpo2	Synpo2
TCONS_00004217	0.946841	0	Inf	0.000820671	0.0276354	TRUE	100043740	Gm4617	Gm4617
TCONS_00004985	0.864703	0	Inf	0.000820671	0.0276354	TRUE	545592	Gm11847	Gm11847
TCONS_00005210	2.18464	0	Inf	0.000820671	0.0276354	TRUE	21687	Tek	Tek
TCONS_00006799	0.995193	0	Inf	0.000820671	0.0276354	TRUE	68303	Fam114a1	Fam114a1
XM_030254244.2	0.975202	0	Inf	0.000820671	0.0276354	TRUE	20239	Atxn2	Atxn2
XM_030254092.2	2.06927	0	Inf	0.000820671	0.0276354	TRUE	12589	Ift81	Ift81
TCONS_00007852	3.69736	0	Inf	0.000820671	0.0276354	TRUE	59008	Anapc5	Anapc5
TCONS_00007156	2.32651	0	Inf	0.000820671	0.0276354	TRUE	71970	Zbed5	Zbed5
TCONS_00007986	1.00609	0	Inf	0.000820671	0.0276354	TRUE	13717	Eln	Eln
TCONS_00008952	0.894198	0	Inf	0.000820671	0.0276354	TRUE	101214	Tra2a	Tra2a
TCONS_00009217	1.30781	0	Inf	0.000820671	0.0276354	TRUE	72263	1700030F04Rik	1700030F04Rik
NM_001360132.1	1.46932	0	Inf	0.000820671	0.0276354	TRUE	20130	Rras	Rras
NM_001243052.1	2.21031	0	Inf	0.000820671	0.0276354	TRUE	12036	Bcat2	Bcat2
TCONS_00010636	2.83748	0	Inf	0.000820671	0.0276354	TRUE	19158	Cyth2	Cyth2
XR_001785588.3	1.24646	0	Inf	0.000820671	0.0276354	TRUE	54122	Uevld	Uevld
TCONS_00010867	11.3128	0	Inf	0.000820671	0.0276354	TRUE	100503605	Hbb-bs	Hbb-bs
TCONS_00010934	0.834769	0	Inf	0.000820671	0.0276354	TRUE	13690	Eif4g2	Eif4g2
TCONS_00013369	2.1204	0	Inf	0.000820671	0.0276354	TRUE	16430	Stt3a	Stt3a
TCONS_00013940	4.89149	0	Inf	0.000820671	0.0276354	TRUE	17281	Fyco1	Fyco1
XR_380269.2	1.17026	0	Inf	0.000820671	0.0276354	TRUE	102636048	Gm38485	Gm38485
XM_030245234.1	1.00554	0	Inf	0.000820671	0.0276354	TRUE	67345	Herc4	Herc4
TCONS_00014286	9.95205	0	Inf	0.000820671	0.0276354	TRUE	75406	Ndufs7	Ndufs7
TCONS_00015185	4.31854	0	Inf	0.000820671	0.0276354	TRUE	14533	Bloc1s1	Bloc1s1
TCONS_00016218	3.89182	0	Inf	0.000820671	0.0276354	TRUE	18016	Nf2	Nf2
XM_006534391.5	1.27003	0	Inf	0.000820671	0.0276354	TRUE	75580	Zbtb4	Zbtb4
TCONS_00016838	1.55373	0	Inf	0.000820671	0.0276354	TRUE	67300	Cltc	Cltc
XM_036156605.1	0.843465	0	Inf	0.000820671	0.0276354	TRUE	217331	Unk	Unk
XM_036157306.1	1.9793	0	Inf	0.000820671	0.0276354	TRUE	217463	Snx13	Snx13
TCONS_00017445	0.891001	0	Inf	0.000820671	0.0276354	TRUE	100101806	Srp54c	Srp54c
TCONS_00017959	1.97266	0	Inf	0.000820671	0.0276354	TRUE	53612	Vti1b	Vti1b
XM_006516544.4	0.964251	0	Inf	0.000820671	0.0276354	TRUE	140580	Elmo1	Elmo1
TCONS_00018738	3.45682	0	Inf	0.000820671	0.0276354	TRUE	20719	Serpinb6a	Serpinb6a
TCONS_00018289	46.8104	0	Inf	0.000820671	0.0276354	TRUE	109620	Dsp	Dsp
TCONS_00018780	4.50464	0	Inf	0.000820671	0.0276354	TRUE	56705	Ranbp9	Ranbp9
TCONS_00018818	1.18333	0	Inf	0.000820671	0.0276354	TRUE	68480	Card19	Card19
XM_006517452.5	0.845375	0	Inf	0.000820671	0.0276354	TRUE	76577	Faf2	Faf2
TCONS_00018911	0.820108	0	Inf	0.000820671	0.0276354	TRUE	238673	Zfp367	Zfp367
XM_030247230.2	1.2622	0	Inf	0.000820671	0.0276354	TRUE	218343	Ttc37	Ttc37
TCONS_00019735	5.44816	0	Inf	0.000820671	0.0276354	TRUE	53600	Timm23	Timm23
TCONS_00019782	1.12978	0	Inf	0.000820671	0.0276354	TRUE	50527	Ero1a	Ero1a
TCONS_00019888	118.045	0	Inf	0.000820671	0.0276354	TRUE	140781	Myh7	Myh7
TCONS_00019890	353.104	0	Inf	0.000820671	0.0276354	TRUE	140781	Myh7	Myh7
TCONS_00020139	1.30271	0	Inf	0.000820671	0.0276354	TRUE	16880	Lifr	Lifr
TCONS_00020910	2.54478	0	Inf	0.000820671	0.0276354	TRUE	223697	Sun2	Sun2
TCONS_00020434	1.16795	0	Inf	0.000820671	0.0276354	TRUE	XLOC_012184	POL	Gag-Pol polyprotein
XM_006522138.4	1.00697	0	Inf	0.000820671	0.0276354	TRUE	252870	Usp7	Usp7
TCONS_00021414	3.22604	0	Inf	0.000820671	0.0276354	TRUE	56637	Gsk3b	Gsk3b
TCONS_00021506	0.880301	0	Inf	0.000820671	0.0276354	TRUE	387246	Mirlet7c-1	Mirlet7c-1
TCONS_00022295	1.75426	0	Inf	0.000820671	0.0276354	TRUE	81877	Tnxb	Tnxb
TCONS_00022369	375.367	0	Inf	0.000820671	0.0276354	TRUE	118568312	LOC118568312	LOC118568312
TCONS_00022949	27.2217	0	Inf	0.000820671	0.0276354	TRUE	118568312	LOC118568312	LOC118568312
TCONS_00022951	20.3941	0	Inf	0.000820671	0.0276354	TRUE	118568312	LOC118568312	LOC118568312
TCONS_00023033	2.99036	0	Inf	0.000820671	0.0276354	TRUE	66530	Ubxn6	Ubxn6
TCONS_00023091	3.0906	0	Inf	0.000820671	0.0276354	TRUE	16549	Khsrp	Khsrp
XM_011246234.2	0.975937	0	Inf	0.000820671	0.0276354	TRUE	106522	Pkdcc	Pkdcc
XM_011246321.3	0.886711	0	Inf	0.000820671	0.0276354	TRUE	19043	Ppm1b	Ppm1b
XM_036161263.1	4.11472	0	Inf	0.000820671	0.0276354	TRUE	67869	Paip2	Paip2
TCONS_00023739	1.93372	0	Inf	0.000820671	0.0276354	TRUE	76594	Dnajc18	Dnajc18
XR_003952541.2	1.56024	0	Inf	0.000820671	0.0276354	TRUE	70791	Hars2	Hars2
TCONS_00023491	2.30615	0	Inf	0.000820671	0.0276354	TRUE	66307	Isoc1	Isoc1
TCONS_00023916	1.03985	0	Inf	0.000820671	0.0276354	TRUE	240444	Kcng2	Kcng2
NM_001381901.1	4.4844	0	Inf	0.000820671	0.0276354	TRUE	114601	Ehbp1l1	Ehbp1l1
TCONS_00024271	1.33295	0	Inf	0.000820671	0.0276354	TRUE	67072	Cdc37l1	Cdc37l1
TCONS_00024433	1.35106	0	Inf	0.000820671	0.0276354	TRUE	73713	Rbm20	Rbm20
TCONS_00025423	1.29636	0	Inf	0.000820671	0.0276354	TRUE	66158	Rtl8a	Rtl8a
TCONS_00025464	2.24875	0	Inf	0.000820671	0.0276354	TRUE	15931	Ids	Ids
TCONS_00025132	1.40526	0	Inf	0.000820671	0.0276354	TRUE	13405	Dmd	Dmd
TCONS_00025673	0.904215	0	Inf	0.000820671	0.0276354	TRUE	20603	Sms	Sms
TCONS_00025736	16.9809	0	Inf	0.000820671	0.0276354	TRUE	17725	mt-Rnr2	mt-Rnr2
TCONS_00025742	0.86716	0	Inf	0.000820671	0.0276354	TRUE	17721	ND5	ND5
TCONS_00025745	58.9059	0	Inf	0.000820671	0.0276354	TRUE	17721	ND5	ND5
TCONS_00025779	12.4547	0	Inf	0.000820671	0.0276354	TRUE	XLOC_015265	-	-
TCONS_00007828	3.01686	0	Inf	0.000820711	0.0276354	TRUE	71985	Acad10	Acad10
XM_036162424.1	2.44408	0	Inf	0.000909325	0.0291578	TRUE	57438	Marchf7	Marchf7
TCONS_00025051	2.5299	0	Inf	0.00092326	0.0292165	TRUE	66158	Rtl8a	Rtl8a
TCONS_00019765	0.990866	0	Inf	0.000946662	0.0295441	TRUE	24131	Ldb3	Ldb3
XM_030253061.2	0.913933	0	Inf	0.000964603	0.0297987	TRUE	100273	Osbpl9	Osbpl9
NM_199465.3	1.38403	0	Inf	0.00163825	0.0377323	TRUE	68810	Nexn	Nexn
XM_030247404.1	5.98144	0	Inf	0.00240543	0.0465562	TRUE	69955	Fars2	Fars2
XR_004934374.1	0.987437	0	Inf	0.00261628	0.0488316	TRUE	102635071	Gm26944	Gm26944
NM_018784.3	2.97499	0.000128	14.5045	0.00186919	0.0404616	TRUE	54613	St3gal6	St3gal6
TCONS_00015348	1.06027	9.63e-05	13.426	0.00124569	0.0335958	TRUE	13591	Ebf1	Ebf1
TCONS_00017162	12.213	0.001165	13.3558	0.000790298	0.0276354	TRUE	11430	Acox1	Acox1
TCONS_00024982	4.42644	0.000426333	13.3419	0.000818366	0.0276354	TRUE	22284	Usp9x	Usp9x
XM_036162790.1	1.35014	0.000200667	12.716	2.04e-05	0.0155632	TRUE	19130	Prox1	Prox1
NM_001360789.1	2.02566	0.000311667	12.6661	0.000818354	0.0276354	TRUE	232989	Hnrnpul1	Hnrnpul1
TCONS_00014109	350.285	0.065304	12.3891	0.00013975	0.0276354	TRUE	18821	Pln	Pln
TCONS_00023584	2.1864	0.000749667	11.51	0.00102687	0.0304533	TRUE	319195	Rpl17	Rpl17
NM_025939.3	8.892	0.00326633	11.4106	0.000731044	0.0276354	TRUE	67054	Paics	Paics
XR_001785476.2	1.03358	0.000416	11.2788	0.000810321	0.0276354	TRUE	11566	Adss	Adss
XM_036156856.1	1.59212	0.000977333	10.6698	4.35e-05	0.0172905	TRUE	544817	Arhgap27	Arhgap27
TCONS_00016414	2.84629	0.00193633	10.5215	0.000918266	0.0292165	TRUE	104625	Cnot6	Cnot6
NM_011664.4	64.2963	0.054623	10.201	2.63e-06	0.0151166	TRUE	22187	Ubb	Ubb
XM_036161354.1	1.31164	0.00155	9.72489	8.14e-05	0.0253471	TRUE	228602	4930402H24Rik	4930402H24Rik
TCONS_00020016	4.13029	0.00722533	9.15896	0.00116536	0.0326432	TRUE	65246	Xpo7	Xpo7
NM_001098225.2	2.58778	0.00525567	8.94362	2.29e-06	0.0151166	TRUE	11496	Adam22	Adam22
TCONS_00011158	75.1389	0.160167	8.87384	2.18e-05	0.0155632	TRUE	13033	Ctsd	Ctsd
XM_006524349.4	2.06463	0.004972	8.69784	0.000680896	0.0276354	TRUE	268977	Ltbp1	Ltbp1
XM_036165926.1	2.25441	0.005907	8.57611	0.000698786	0.0276354	TRUE	18575	Pde1c	Pde1c
TCONS_00011888	3.23273	0.0101533	8.31465	0.000206442	0.0276354	TRUE	16337	Insr	Insr
XM_036163601.1	2.09101	0.00680967	8.2624	0.000856381	0.0281337	TRUE	11428	Aco1	Aco1
XM_030250546.2	1.70533	0.00590867	8.17301	0.00086113	0.0281727	TRUE	56386	B4galt6	B4galt6
TCONS_00005890	1.65025	0.00583533	8.14365	0.000642378	0.0276354	TRUE	269529	Fbxo10	Fbxo10
TCONS_00023376	2.15409	0.008678	7.9555	0.00096005	0.0297987	TRUE	19290	Pura	Pura
XM_006534523.2	1.99289	0.00804	7.95345	0.000614637	0.0276354	TRUE	79566	Sh3bp5l	Sh3bp5l
XM_006503677.4	1.28784	0.00563833	7.83547	0.000849239	0.028103	TRUE	11518	Add1	Add1
TCONS_00025226	2.42359	0.010799	7.8101	0.00108385	0.0314517	TRUE	12830	Col4a5	Col4a5
XM_036157391.1	4.17091	0.019118	7.76929	0.00127269	0.0340844	TRUE	12847	Copa	Copa
TCONS_00017437	2.51518	0.0124837	7.65447	0.000375769	0.0276354	TRUE	100101806	Srp54c	Srp54c
XM_036162479.1	0.923883	0.00617833	7.22435	0.00246229	0.0472596	TRUE	66691	Gapvd1	Gapvd1
NR_166155.1	2.16934	0.0147877	7.19672	0.000782307	0.0276354	TRUE	19157	Cyth1	Cyth1
TCONS_00012867	0.820922	0.006047	7.08488	0.000423387	0.0276354	TRUE	214897	Csnk1g1	Csnk1g1
XM_017317778.3	0.826306	0.00611767	7.07755	0.000717464	0.0276354	TRUE	100502841	Epg5	Epg5
XM_030243724.1	2.38203	0.0179517	7.05193	0.000395132	0.0276354	TRUE	80914	Uck2	Uck2
TCONS_00018553	2.43836	0.0188747	7.01332	0.00147477	0.0361351	TRUE	238871	Pde4d	Pde4d
NM_001290345.1	4.04558	0.033215	6.92837	0.00117069	0.0326432	TRUE	225028	Map4k3	Map4k3
NM_009647.5	3.29582	0.0275303	6.90347	0.00015385	0.0276354	TRUE	11639	Ak4	Ak4
XM_030253265.2	10.1429	0.0879607	6.84939	5.59e-05	0.0207661	TRUE	16451	Jak1	Jak1
TCONS_00001309	6.60446	0.058859	6.81003	0.00195911	0.0413468	TRUE	12628	Cfh	Cfh
TCONS_00023547	2.33466	0.0211037	6.78958	0.000969142	0.0297987	TRUE	72124	Seh1l	Seh1l
NM_022879.2	4.26588	0.0399237	6.73946	0.00254666	0.0481565	TRUE	17898	Myl7	Myl7
NR_151627.1	1.84842	0.0174057	6.73059	0.000639215	0.0276354	TRUE	76295	Atp11b	Atp11b
NM_001360002.1	1.57024	0.0150463	6.70543	0.00110362	0.0316263	TRUE	228026	Pdk1	Pdk1
XM_017321605.3	1.57045	0.0165473	6.56843	0.00103662	0.0304533	TRUE	27418	Mkln1	Mkln1
XM_006538665.4	0.972007	0.0104583	6.53824	0.00196035	0.0413468	TRUE	192185	Nadk	Nadk
NM_001136066.2	7.45295	0.080383	6.53478	0.00191538	0.0409992	TRUE	15369	Hmox2	Hmox2
NM_001081242.2	2.63951	0.0295667	6.48015	0.000371777	0.0276354	TRUE	70549	Tln2	Tln2
XM_036163391.1	1.4673	0.0165453	6.47059	0.000430899	0.0276354	TRUE	76295	Atp11b	Atp11b
XM_030245515.2	1.22489	0.014136	6.43713	0.000731975	0.0276354	TRUE	12808	Cobl	Cobl
XM_030244824.1	2.3702	0.0304847	6.28078	0.00087713	0.028534	TRUE	110829	Lims1	Lims1
TCONS_00025377	5.87088	0.0767693	6.2569	0.000794087	0.0276354	TRUE	104130	Ndufb11	Ndufb11
XM_011245729.1	1.37594	0.0181113	6.24738	0.000739368	0.0276354	TRUE	71474	Ppp6r2	Ppp6r2
XM_030245468.2	1.14726	0.0153897	6.22008	0.000361679	0.0276354	TRUE	108903	Tbcd	Tbcd
XM_006505459.3	3.84378	0.0527657	6.18678	0.000467463	0.0276354	TRUE	12444	Ccnd2	Ccnd2
NM_010549.3	3.03172	0.0423287	6.16236	0.00113857	0.0321367	TRUE	16157	Il11ra1	Il11ra1
XR_374419.4	0.86038	0.0121167	6.14991	0.00165939	0.0380084	TRUE	16569	Kif3b	Kif3b
TCONS_00014560	0.884197	0.0126063	6.13215	0.00166014	0.0380084	TRUE	381990	Zbtb2	Zbtb2
NM_001361942.1	1.17555	0.017203	6.09453	0.0021281	0.0433756	TRUE	18972	Pold2	Pold2
NM_153080.3	1.13139	0.017205	6.03913	0.00117465	0.0326745	TRUE	216810	Tom1l2	Tom1l2
XM_030244718.2	0.935272	0.0147827	5.98341	0.00120816	0.0332056	TRUE	78267	Klhdc8b	Klhdc8b
TCONS_00015694	25.1868	0.408246	5.94709	0.000133892	0.0276354	TRUE	216961	Coro6	Coro6
NM_011207.2	2.85143	0.047324	5.91297	0.000765875	0.0276354	TRUE	545622	Ptpn3	Ptpn3
XR_003953689.2	0.953743	0.0173077	5.78412	0.000415652	0.0276354	TRUE	665700	Hmcn2	Hmcn2
TCONS_00001419	1.2949	0.0241017	5.74757	0.000786733	0.0276354	TRUE	18986	Pou2f1	Pou2f1
XM_036158835.1	7.3498	0.138245	5.73241	0.000271193	0.0276354	TRUE	68059	Tm9sf2	Tm9sf2
XM_036162252.1	0.896072	0.017858	5.64897	0.000712386	0.0276354	TRUE	27103	Eif2ak4	Eif2ak4
XM_006524674.5	2.99592	0.0603897	5.63255	0.000527102	0.0276354	TRUE	56468	Socs5	Socs5
NM_001355755.1	9.13829	0.191058	5.57984	0.00178945	0.0391774	TRUE	17896	Myl4	Myl4
XM_030251309.2	7.83177	0.176549	5.4712	0.00199957	0.0419257	TRUE	22284	Usp9x	Usp9x
XM_006513338.4	1.64072	0.037586	5.44799	0.000369644	0.0276354	TRUE	18114	Rrp1	Rrp1
XM_006518778.1	0.97065	0.0248183	5.28947	0.00216379	0.0438208	TRUE	211922	Dennd6a	Dennd6a
XR_004938025.1	1.89412	0.0486987	5.2815	0.00053192	0.0276354	TRUE	218629	Dhx29	Dhx29
NM_144922.3	4.44707	0.118445	5.23056	0.00237962	0.0463624	TRUE	232989	Hnrnpul1	Hnrnpul1
XR_004941278.1	0.940819	0.0256503	5.19687	0.000596059	0.0276354	TRUE	14466	Gba	Gba
XM_036156491.1	2.73364	0.07479	5.19183	7.86e-05	0.0253471	TRUE	20787	Srebf1	Srebf1
TCONS_00015593	1.18482	0.0324723	5.18931	0.000135658	0.0276354	TRUE	56310	Gps2	Gps2
TCONS_00015695	8.24778	0.241084	5.0964	0.000316663	0.0276354	TRUE	216961	Coro6	Coro6
TCONS_00022043	6.07359	0.19545	4.95768	0.0002461	0.0276354	TRUE	20656	Sod2	Sod2
XM_006504490.4	5.04204	0.162342	4.9569	0.000582299	0.0276354	TRUE	66711	Sbds	Sbds
XM_036161998.1	4.94291	0.169671	4.86455	0.000222044	0.0276354	TRUE	241694	Ralgapa2	Ralgapa2
NM_027113.2	2.3334	0.0822317	4.8266	0.00171747	0.0384046	TRUE	69544	Wdr5b	Wdr5b
TCONS_00015789	0.855672	0.031853	4.74756	0.0012857	0.0341943	TRUE	107476	Acaca	Acaca
NM_173735.3	2.22002	0.086604	4.68	0.000543181	0.0276354	TRUE	217732	Cipc	Cipc
XM_006530878.1	0.923806	0.0383027	4.59207	3.17e-05	0.0155632	TRUE	234595	Slc38a7	Slc38a7
NM_011785.4	1.5986	0.0690953	4.53208	0.0015947	0.037419	TRUE	23797	Akt3	Akt3
NM_009052.2	9.32657	0.405101	4.52499	0.000130238	0.0276354	TRUE	19716	Bex1	Bex1
NM_001169577.1	1.41218	0.0643033	4.45689	0.00189306	0.0407486	TRUE	22214	Ube2h	Ube2h
XM_011245735.2	1.75448	0.0840673	4.38335	0.000623553	0.0276354	TRUE	71919	Rpap3	Rpap3
XM_006533995.4	1.20768	0.0603787	4.32205	0.000196345	0.0276354	TRUE	67473	Slc47a1	Slc47a1
NM_010706.2	2.93865	0.147777	4.31366	0.00157403	0.0372453	TRUE	16855	Lgals4	Lgals4
XM_030248555.2	1.40417	0.071697	4.29166	0.00216897	0.0438208	TRUE	239555	Mief1	Mief1
NM_026275.4	5.99431	0.341337	4.13433	0.000853945	0.0281337	TRUE	67615	Ube2r2	Ube2r2
TCONS_00001035	39.6786	2.46049	4.01134	0.00031257	0.0276354	TRUE	21961	Tns1	Tns1
NM_001142937.2	0.996306	0.065943	3.9173	0.00264548	0.0491363	TRUE	64113	Moap1	Moap1
NM_001288613.1	2.10893	0.14069	3.90593	0.000401703	0.0276354	TRUE	245860	Atg9a	Atg9a
TCONS_00008421	2.84843	0.199546	3.83537	0.00138393	0.0351828	TRUE	20019	Polr1a	Polr1a
NM_001165902.1	1.01086	0.074119	3.76959	0.000164837	0.0276354	TRUE	12387	Ctnnb1	Ctnnb1
NM_199468.2	2.36875	0.177523	3.73804	0.000371092	0.0276354	TRUE	213436	Rtl3	Rtl3
XM_011245351.4	4.21198	0.316444	3.73447	0.00123918	0.0335637	TRUE	223455	Marchf6	Marchf6
XM_030246370.1	1.75393	0.133176	3.71919	3e-05	0.0155632	TRUE	72729	Cdc42se2	Cdc42se2
XM_036155419.1	0.992394	0.075402	3.71824	0.00019691	0.0276354	TRUE	84585	Rnf123	Rnf123
TCONS_00000054	5.41743	0.414156	3.70936	0.00225289	0.0446545	TRUE	13518	Dst	Dst
NM_133664.3	2.17237	0.171618	3.662	0.000206847	0.0276354	TRUE	16763	Lad1	Lad1
TCONS_00002106	3.24208	0.260303	3.63866	0.00127854	0.0341499	TRUE	17868	Mybpc3	Mybpc3
XM_011249562.3	2.18322	0.182985	3.57666	0.000523037	0.0276354	TRUE	69162	Sec31a	Sec31a
XM_036165966.1	2.56827	0.215785	3.57313	0.00266393	0.0492416	TRUE	338366	Mia3	Mia3
NR_045640.1	1.13868	0.103314	3.46226	0.00108062	0.0314517	TRUE	100504377	Gm20199	Gm20199
TCONS_00000117	5.58448	0.515247	3.43809	0.001255	0.0336889	TRUE	666642	Gm8210	Gm8210
NM_001355651.1	1.98661	0.186929	3.40975	0.00197354	0.041549	TRUE	74182	Gpcpd1	Gpcpd1
TCONS_00003090	48.6961	5.04546	3.27075	0.00142778	0.0355126	TRUE	22138	Ttn	Ttn
XR_874696.3	1.10692	0.118567	3.22277	0.000497883	0.0276354	TRUE	100042988	Gm4151	Gm4151
XM_006519358.3	2.10967	0.25084	3.07218	0.00255949	0.0482407	TRUE	65107	Lrp10	Lrp10
NM_001362456.1	4.13095	0.493128	3.06644	0.000339807	0.0276354	TRUE	16509	Kcne1	Kcne1
NM_172635.3	2.3584	0.30042	2.97276	0.00236898	0.0462393	TRUE	225929	Patl1	Patl1
NM_026543.3	1.82799	0.233223	2.97047	0.0020801	0.0430061	TRUE	68067	Mrnip	Mrnip
NM_010489.2	3.40604	0.443805	2.94009	0.00142619	0.0355126	TRUE	15587	Hyal2	Hyal2
XM_036162370.1	1.65882	0.217286	2.93249	0.000454649	0.0276354	TRUE	50915	Grb14	Grb14
TCONS_00025777	26.7627	3.52762	2.92345	0.00141511	0.0355126	TRUE	XLOC_015265	-	-
NM_010321.1	4.37084	0.603805	2.85576	0.0010451	0.0305788	TRUE	14711	Gnmt	Gnmt
NM_001115132.2	3.1926	0.540685	2.56187	0.00108613	0.0314517	TRUE	52683	Ncaph2	Ncaph2
NM_001099742.1	54.1031	11.0429	2.2926	0.000526721	0.0276354	TRUE	338417	Scgb1c1	Scgb1c1
NM_029182.1	5.28095	1.10421	2.25778	0.00103307	0.0304533	TRUE	75141	Rasd2	Rasd2
XM_006515925.4	1.17794	0.258766	2.18654	0.000952025	0.0296311	TRUE	26932	Ppp2r5e	Ppp2r5e
XM_006517134.5	1.9852	0.448937	2.1447	0.00060106	0.0276354	TRUE	18193	Nsd1	Nsd1
NM_008343.2	13.9638	3.20116	2.12502	0.00190829	0.0409992	TRUE	16009	Igfbp3	Igfbp3
TCONS_00004761	4.1469	1.0097	2.03811	0.00186551	0.0404581	TRUE	105244531	Gm40124	Gm40124
NM_013799.3	1.05172	0.261099	2.01008	0.0019568	0.0413468	TRUE	11907	Ate1	Ate1
TCONS_00007449	2.07112	0.521364	1.99005	1.65e-05	0.0155632	TRUE	100502829	Gm9899	Gm9899
TCONS_00008302	2.58984	0.6525	1.98881	0.0010275	0.0304533	TRUE	XLOC_004874	LORF2	LINE-1 retrotransposable element ORF2 protein
NM_008013.4	16.4985	4.37503	1.91497	0.000255543	0.0276354	TRUE	14190	Fgl2	Fgl2
NM_010865.3	4.62467	1.26554	1.8696	0.000550435	0.0276354	TRUE	17926	Myoc	Myoc
NM_019771.2	78.1587	21.7647	1.84442	2.99e-05	0.0155632	TRUE	56431	Dstn	Dstn
NM_009252.2	6.05386	1.69926	1.83294	0.000820207	0.0276354	TRUE	20716	Serpina3n	Serpina3n
NM_022032.4	119.731	36.8542	1.6999	0.00103486	0.0304533	TRUE	64058	Perp	Perp
NM_145447.2	2.72949	0.849176	1.6845	0.00015539	0.0276354	TRUE	217721	Flvcr2	Flvcr2
TCONS_00008585	4.18488	1.34599	1.63652	0.000654945	0.0276354	TRUE	16438	Itpr1	Itpr1
XM_030246337.1	3.41815	1.10839	1.62474	0.00130476	0.0342571	TRUE	71947	Tmem94	Tmem94
NM_001081047.1	5.00599	1.72223	1.53938	0.00208512	0.0430152	TRUE	194231	Cnksr1	Cnksr1
NM_194054.3	19.3943	6.79656	1.51275	0.00219731	0.0438821	TRUE	68585	Rtn4	Rtn4
TCONS_00000762	0	2.9012	#NAME?	2.89e-05	0.0155632	TRUE	16780	Lamb3	Lamb3
XM_006503378.4	0	6.3164	#NAME?	0.000264235	0.0276354	TRUE	69780	Smap2	Smap2
TCONS_00019410	0	3.23251	#NAME?	0.000402304	0.0276354	TRUE	102633419	Gm31251	Gm31251
NM_026824.4	0	3.13193	#NAME?	0.000987532	0.0299274	TRUE	68730	Dus1l	Dus1l
TCONS_00019414	0	5.07312	#NAME?	0.00136723	0.0351828	TRUE	102633419	Gm31251	Gm31251
TCONS_00019401	0	124.227	#NAME?	0.00198673	0.0417504	TRUE	67272	Cmtm5	Cmtm5
TCONS_00019881	0	1232	#NAME?	0.00202916	0.0423331	TRUE	17888	Myh6	Myh6
TCONS_00022743	0	2.34559	#NAME?	0.00204934	0.0426766	TRUE	30957	Mapk8ip3	Mapk8ip3
NM_010856.4	0	33.5669	#NAME?	0.00207046	0.0428838	TRUE	17888	Myh6	Myh6
XM_036158471.1	0	2.40576	#NAME?	0.0021495	0.0436572	TRUE	15460	Hr	Hr
NM_183283.3	1.93158	5.54452	-1.52129	0.000297473	0.0276354	TRUE	69576	Smco1	Smco1
NM_008688.3	4.59623	14.0914	-1.61629	0.00200236	0.0419257	TRUE	18029	Nfic	Nfic
NM_025557.1	16.3196	50.2128	-1.62145	0.000300043	0.0276354	TRUE	66425	Pcp4l1	Pcp4l1
NM_173866.4	1.46859	5.47079	-1.89731	0.000818569	0.0276354	TRUE	108682	Gpt2	Gpt2
NR_168272.1	1.1143	4.44833	-1.99712	0.00121801	0.0333441	TRUE	105246846	Gm42067	Gm42067
XM_017312968.3	0.581775	2.49626	-2.10124	0.000901311	0.028993	TRUE	80914	Uck2	Uck2
NM_001357820.1	32.2898	156.362	-2.27574	0.000207912	0.0276354	TRUE	67268	Myl12a	Myl12a
XM_036163366.1	1.37645	7.04429	-2.35551	0.00138225	0.0351828	TRUE	74776	Ppa2	Ppa2
NM_133778.2	1.39379	7.42655	-2.41368	0.000395429	0.0276354	TRUE	78408	Fam131a	Fam131a
TCONS_00007217	0.74051	4.21733	-2.50974	0.0010462	0.0305788	TRUE	78829	Tsc22d4	Tsc22d4
NM_011110.4	1.3563	7.86571	-2.5359	0.00111225	0.0316263	TRUE	18784	Pla2g5	Pla2g5
NM_001347446.1	1.16147	7.15854	-2.62371	0.00045152	0.0276354	TRUE	94089	Trim7	Trim7
NM_009784.2	0.657135	4.28716	-2.70576	0.000911497	0.0291578	TRUE	12293	Cacna2d1	Cacna2d1
NM_001110844.1	0.631283	4.45131	-2.81787	0.000493731	0.0276354	TRUE	12293	Cacna2d1	Cacna2d1
NM_053200.2	6.24929	45.7629	-2.87241	0.00125479	0.0336889	TRUE	104158	Ces1d	Ces1d
NM_001013390.3	2.15251	16.2847	-2.91942	0.00111032	0.0316263	TRUE	399548	Scn4b	Scn4b
NM_008226.2	0.545519	4.3639	-2.99992	0.000415767	0.0276354	TRUE	15166	Hcn2	Hcn2
TCONS_00019407	4.67917	48.6985	-3.37955	0.00148522	0.0361929	TRUE	68966	Ngdn	Ngdn
NM_028771.3	0.353089	5.23544	-3.89021	0.000248656	0.0276354	TRUE	52132	Ccdc97	Ccdc97
XM_006539214.4	1.7187	28.9022	-4.07179	0.000268232	0.0276354	TRUE	74202	Fblim1	Fblim1
TCONS_00013708	0.191169	3.31649	-4.11673	3.6e-05	0.0155632	TRUE	XLOC_008139	LORF2	LINE-1 retrotransposable element ORF2 protein
NM_024454.1	0.620409	17.8734	-4.84845	0.000508496	0.0276354	TRUE	216344	Rab21	Rab21
NR_028422.1	0.891445	34.4444	-5.27198	0.000110105	0.0276354	TRUE	100303644	C130080G10Rik	C130080G10Rik
NM_013651.4	0.17961	7.15197	-5.3154	0.00174107	0.0385677	TRUE	20222	Sf3a2	Sf3a2
NM_001252638.1	0.0385657	2.18074	-5.82136	0.00249007	0.0476339	TRUE	69288	Rhobtb1	Rhobtb1
TCONS_00013701	0.0495783	3.88024	-6.29029	0.000203987	0.0276354	TRUE	102633237	Gm31114	Gm31114
TCONS_00022742	0.033413	2.79614	-6.38688	0.000274522	0.0276354	TRUE	30957	Mapk8ip3	Mapk8ip3
TCONS_00018546	0.037963	3.25126	-6.42026	0.00216824	0.0438208	TRUE	XLOC_011115	LORF2	LINE-1 retrotransposable element ORF2 protein
NM_001365015.1	0.034765	3.56665	-6.68079	0.000537359	0.0276354	TRUE	225341	Lims2	Lims2
TCONS_00019402	0.115067	37.1854	-8.33611	0.000332797	0.0276354	TRUE	67272	Cmtm5	Cmtm5
XM_006518707.3	0.007019	4.54103	-9.33754	0.00110514	0.0316263	TRUE	19056	Ppp3cb	Ppp3cb
TCONS_00019409	0.00154233	5.1656	-11.7096	0.00121899	0.0333441	TRUE	102633419	Gm31251	Gm31251

## Sheet: HypoTH+T3 vs HypoTH
Transcript	HypoTH+T3 GROUP value	HypoTH GROUP value	log2foldchange	pvalue	qvalue	significance	gene_id	gene_name	gene_description
TCONS_00015740	7.23705	0	Inf	5.96453e-05	0.0212667	TRUE	18015	Nf1	Nf1		Upregulated
TCONS_00015648	48.1978	0	Inf	6.52595e-05	0.022105	TRUE	74148	Cluh	Cluh		Downregulated
NM_016897.3	41.4155	0	Inf	0.000116778	0.0269876	TRUE	53600	Timm23	Timm23
TCONS_00007365	2.18958	0	Inf	0.000169847	0.0295034	TRUE	115490168	Gm43000	Gm43000
XM_006500280.4	19.5339	0	Inf	0.000304861	0.0389239	TRUE	74182	Gpcpd1	Gpcpd1
XM_006496860.4	2.11798	0	Inf	0.000621411	0.0458185	TRUE	26374	Cop1	Cop1
XM_030252132.1	37.5407	0	Inf	0.000740675	0.0481405	TRUE	74182	Gpcpd1	Gpcpd1
NM_025588.2	6.76155	0.032454	7.70281	2.30424e-06	0.0151035	TRUE	66482	Exoc2	Exoc2
TCONS_00020832	29.4588	0.145171	7.6648	5.64186e-06	0.0151035	TRUE	18810	Plec	Plec
NM_001356531.3	2.02824	0.0138843	7.19062	3.5682e-05	0.01818	TRUE	75909	Vmp1	Vmp1
XR_003950992.1	2.02625	0.0234093	6.43559	0.000126584	0.0269876	TRUE	115488289	Gm52092	Gm52092
NM_001370764.1	4.11494	0.095295	5.43233	0.000599908	0.0457883	TRUE	546611	Klhl33	Klhl33
XM_030250570.2	5.92515	0.137757	5.42666	0.000254204	0.036167	TRUE	66054	Cndp2	Cndp2
TCONS_00016553	10.6886	0.339868	4.97496	2.39495e-05	0.0170785	TRUE	26572	Cops3	Cops3
TCONS_00013708	5.23369	0.191169	4.77491	0.000317639	0.0389239	TRUE	XLOC_008139	LORF2	LINE-1 retrotransposable element ORF2 protein
XR_869605.4	6.47719	0.245065	4.72413	0.000600244	0.0457883	TRUE	232536	Mrps35	Mrps35
NM_008226.2	11.9974	0.545519	4.45895	0.000228346	0.0339985	TRUE	15166	Hcn2	Hcn2
XR_001780794.3	12.0658	0.593195	4.34628	1.4147e-05	0.0170785	TRUE	56705	Ranbp9	Ranbp9
NM_001310726.1	91.4604	4.77443	4.25975	0.000533746	0.0457883	TRUE	20054	Rps15	Rps15
XM_036161518.1	38.5349	2.02854	4.24765	0.000220293	0.0338344	TRUE	22359	Vldlr	Vldlr
NM_001159564.1	4.71796	0.301014	3.97026	0.000480619	0.0452216	TRUE	16420	Itgb6	Itgb6
NM_019568.2	5.42329	0.355125	3.93277	0.0003936	0.0416362	TRUE	57266	Cxcl14	Cxcl14
TCONS_00022683	4.09104	0.272189	3.90979	0.000251501	0.036167	TRUE	68799	Rgmb	Rgmb
TCONS_00004793	5.20738	0.377313	3.78673	0.000332671	0.0389239	TRUE	118449	Synpo2	Synpo2
TCONS_00000678	11.7661	0.964368	3.60891	0.000135811	0.0273006	TRUE	226744	Cnst	Cnst
TCONS_00015237	3.24412	0.308491	3.39453	0.000354346	0.0389239	TRUE	103988	Gck	Gck
NM_053200.2	63.651	6.24929	3.34842	0.000606325	0.0457883	TRUE	104158	Ces1d	Ces1d
NM_001110844.1	5.83549	0.631283	3.2085	0.000848036	0.0481405	TRUE	12293	Cacna2d1	Cacna2d1
NM_001347446.1	10.683	1.16147	3.20129	0.000677424	0.0471855	TRUE	94089	Trim7	Trim7
NM_023799.4	33.0192	3.64683	3.17859	4.31407e-05	0.018266	TRUE	76055	Oga	Oga
TCONS_00016256	10.2929	1.19283	3.10919	0.000419442	0.0433818	TRUE	108167883	Gm46270	Gm46270
NM_011110.4	11.0745	1.3563	3.0295	0.000204401	0.0322026	TRUE	18784	Pla2g5	Pla2g5
NM_009784.2	5.15138	0.657135	2.9707	2.29224e-05	0.0170785	TRUE	12293	Cacna2d1	Cacna2d1
NM_175515.5	10.4818	1.45884	2.84499	0.000146264	0.0281784	TRUE	380614	Intu	Intu
XM_006507035.5	4.99986	0.742507	2.75141	0.000752618	0.0481405	TRUE	232536	Mrps35	Mrps35
NM_007621.2	9.1091	1.55125	2.55387	0.00090093	0.0481405	TRUE	12409	Cbr2	Cbr2
NM_011079.3	4.12592	0.712811	2.53312	0.000625	0.0458185	TRUE	18682	Phkg1	Phkg1
XM_011244955.3	7.8882	1.49158	2.40286	0.000950309	0.0493323	TRUE	142687	Asb14	Asb14
TCONS_00007655	4.2984	0.814027	2.40065	0.000772964	0.0481405	TRUE	269113	Nup54	Nup54
NM_001081667.2	5.44418	1.05157	2.37218	0.000796633	0.0481405	TRUE	245683	Klhl34	Klhl34
NM_001357820.1	166.428	32.2898	2.36575	0.000147662	0.0281784	TRUE	67268	Myl12a	Myl12a
NM_001012477.2	44.0488	8.72303	2.3362	0.000898609	0.0481405	TRUE	20315	Cxcl12	Cxcl12
TCONS_00018645	22.8177	4.54431	2.32802	0.000224747	0.0338344	TRUE	238505	Mtr	Mtr
XM_006540332.4	9.9189	2.04257	2.27979	0.000188605	0.0307881	TRUE	68188	Sympk	Sympk
TCONS_00023473	2.75814	0.585867	2.23505	0.000338807	0.0389239	TRUE	106869	Tnfaip8	Tnfaip8
TCONS_00006700	3.58679	0.7941	2.1753	0.00030381	0.0389239	TRUE	115490103	Gm30708	Gm30708
NM_011677.2	7.02456	1.60334	2.13133	0.000157708	0.0291464	TRUE	22256	Ung	Ung
XR_004933998.1	4.98359	1.2997	1.939	0.000543769	0.0457883	TRUE	11870	Art1	Art1
NM_025806.2	19.9639	5.30956	1.91073	0.000595183	0.0457883	TRUE	66857	Plbd1	Plbd1
NM_001013013.2	55.1986	15.5905	1.82396	0.000165641	0.0291464	TRUE	68460	Dhrs7c	Dhrs7c
NM_001008791.2	4.09176	1.17491	1.80017	0.000677905	0.0471855	TRUE	73750	Whrn	Whrn
NM_010260.1	8.06056	2.3896	1.75411	0.000791324	0.0481405	TRUE	14469	Gbp2	Gbp2
NM_009062.3	6.29964	1.8883	1.73818	0.000862536	0.0481405	TRUE	19736	Rgs4	Rgs4
NM_019694.2	18.929	5.73717	1.72218	0.000131595	0.0270149	TRUE	56384	Letm1	Letm1
NM_001374700.1	101.24	31.3125	1.69297	0.000125573	0.0269876	TRUE	210582	Coq10a	Coq10a
XM_017322067.3	3.8355	1.2055	1.66978	0.000109768	0.0269876	TRUE	20430	Cyfip1	Cyfip1
NM_011923.4	24.6778	7.796	1.66241	0.000122327	0.0269876	TRUE	26360	Angptl2	Angptl2
NM_011851.4	4.84952	1.58298	1.6152	0.000879999	0.0481405	TRUE	23959	Nt5e	Nt5e
XM_036155246.1	3.35779	1.11942	1.58476	0.000890621	0.0481405	TRUE	69536	Hemk1	Hemk1
NM_027570.4	15.1071	5.24171	1.52711	0.000964076	0.0496664	TRUE	52815	Ldhd	Ldhd
TCONS_00024776	0	3.89536	#NAME?	8.40507e-06	0.0151035	TRUE	54132	Pdlim1	Pdlim1
XR_004940181.1	0	21.7606	#NAME?	1.96511e-05	0.0170785	TRUE	76055	Oga	Oga
XM_006541546.4	0	3.7435	#NAME?	4.25548e-05	0.018266	TRUE	72065	Rap2c	Rap2c
NM_177059.3	0	2.66003	#NAME?	0.000126235	0.0269876	TRUE	320027	Fstl4	Fstl4
TCONS_00020836	0	4.63272	#NAME?	0.000156062	0.0291464	TRUE	18810	Plec	Plec
TCONS_00020834	0	4.25132	#NAME?	0.000217432	0.0338344	TRUE	18810	Plec	Plec
TCONS_00005304	0	2.46557	#NAME?	0.000298541	0.0388936	TRUE	666048	Trabd2b	Trabd2b
XM_006512550.4	0	2.47697	#NAME?	0.000423953	0.0435162	TRUE	14816	Grm1	Grm1
XM_030247404.1	0	5.98144	#NAME?	0.000625613	0.0458185	TRUE	69955	Fars2	Fars2
NM_001378919.1	0	22.3734	#NAME?	0.000639996	0.0459741	TRUE	107227	Macrod1	Macrod1
XM_006511156.2	0	1.84218	#NAME?	0.000693213	0.0474361	TRUE	24127	Xrn1	Xrn1
NM_001361607.1	0	323.831	#NAME?	0.000844641	0.0481405	TRUE	140781	Myh7	Myh7
NM_133198.2	1.11267	3.3418	-1.58661	0.000484887	0.0453085	TRUE	110095	Pygl	Pygl
NM_001164100.2	1.03113	3.87442	-1.90976	0.000913095	0.0481405	TRUE	27360	Add3	Add3
NM_001205076.1	0.65445	2.54809	-1.96106	0.000576378	0.0457883	TRUE	59091	Jph2	Jph2
XM_030248694.2	2.96066	12.228	-2.0462	0.000396419	0.0416362	TRUE	66445	Cyc1	Cyc1
XR_376121.3	0.594435	2.50116	-2.07301	0.000752847	0.0481405	TRUE	102633985	Gm31678	Gm31678
NM_011582.3	0.645203	2.89576	-2.16612	0.000125505	0.0269876	TRUE	21828	Thbs4	Thbs4
NR_015601.1	0.867213	4.03274	-2.2173	3.14379e-05	0.01818	TRUE	68128	Fam120aos	Fam120aos
1.00042e+08	15.2322	71.2972	-2.22672	0.000751463	0.0481405	TRUE	100042008	Gm9794	Gm9794
XR_004942910.1	0.25042	1.27758	-2.35099	0.000479123	0.0452216	TRUE	111173	Erc1	Erc1
NM_001359370.1	0.199947	1.34815	-2.75329	0.000566956	0.0457883	TRUE	69940	Exoc1	Exoc1
XM_006495804.3	0.174617	1.41705	-3.02063	0.000101551	0.0269876	TRUE	20353	Sema4c	Sema4c
XM_006539897.3	0.104231	0.853869	-3.03423	0.000634289	0.0459571	TRUE	233103	Garre1	Garre1
NM_019505.4	0.138756	1.33657	-3.26792	0.000575175	0.0457883	TRUE	56077	Dgke	Dgke
NM_173735.3	0.229998	2.22002	-3.27088	0.000115194	0.0269876	TRUE	217732	Cipc	Cipc
NM_001311139.1	0.0904963	0.89406	-3.30444	2.99287e-06	0.0151035	TRUE	19347	Dennd5a	Dennd5a
XM_006532716.4	0.700225	7.47835	-3.41683	0.000519256	0.0457883	TRUE	20787	Srebf1	Srebf1
TCONS_00024994	0.110956	1.27062	-3.51747	1.03827e-05	0.0156305	TRUE	236732	Rbm10	Rbm10
NM_001355651.1	0.171059	1.98661	-3.53774	9.07675e-05	0.0266628	TRUE	74182	Gpcpd1	Gpcpd1
NM_133664.3	0.171622	2.17237	-3.66197	0.000127478	0.0269876	TRUE	16763	Lad1	Lad1
XM_011245449.1	0.283653	4.30942	-3.92529	0.000108082	0.0269876	TRUE	140570	Plxnb2	Plxnb2
NM_001362456.1	0.263957	4.13095	-3.9681	0.000438367	0.0443974	TRUE	16509	Kcne1	Kcne1
NM_199468.2	0.0941517	2.36875	-4.65299	9.01034e-05	0.0266628	TRUE	213436	Rtl3	Rtl3
XR_003952753.2	0.120657	3.05927	-4.6642	0.000702011	0.0477967	TRUE	18739	Pitpnm1	Pitpnm1
NM_026543.3	0.071765	1.82799	-4.67083	2.25959e-05	0.0170785	TRUE	68067	Mrnip	Mrnip
NM_001355755.1	0.306126	9.13829	-4.89972	6.15733e-05	0.0213912	TRUE	17896	Myl4	Myl4
NM_010911.2	0.24576	7.51972	-4.93536	0.000178772	0.0302088	TRUE	18041	Nfs1	Nfs1
NM_001205236.1	0.0310063	1.12327	-5.17899	0.000890687	0.0481405	TRUE	544817	Arhgap27	Arhgap27
TCONS_00004106	0.163281	6.01598	-5.20337	0.000137017	0.0273006	TRUE	108168886	Gm46816	Gm46816
TCONS_00014560	0.0238173	0.884197	-5.21428	0.000623175	0.0458185	TRUE	381990	Zbtb2	Zbtb2
NM_146105.3	0.288459	12.174	-5.3993	0.000969368	0.0497499	TRUE	226744	Cnst	Cnst
XM_006538165.4	0.0372683	1.6639	-5.48047	0.000348109	0.0389239	TRUE	66401	Nudt2	Nudt2
XM_036158117.1	0.0960283	4.82507	-5.65095	3.0104e-05	0.01818	TRUE	66482	Exoc2	Exoc2
NM_001360132.1	0.025642	1.46932	-5.84049	0.000897172	0.0481405	TRUE	20130	Rras	Rras
NM_009052.2	0.122887	9.32657	-6.24594	0.000264265	0.036167	TRUE	19716	Bex1	Bex1
NM_023149.3	0.044909	3.56448	-6.31054	0.000336104	0.0389239	TRUE	66054	Cndp2	Cndp2
TCONS_00019895	4.92982	413.307	-6.38953	0.000586275	0.0457883	TRUE	140781	Myh7	Myh7
XM_006516893.5	0.0207	4.40767	-7.73424	2.07925e-05	0.0170785	TRUE	20729	Spin1	Spin1
NM_001277318.1	0.0198707	4.39755	-7.78992	0.000173577	0.0297696	TRUE	66270	Retreg1	Retreg1
XM_006526134.5	0.00834467	2.65757	-8.31504	0.000765111	0.0481405	TRUE	59025	Usp14	Usp14
NM_011664.4	0.0668753	64.2963	-9.90905	3.92584e-05	0.01818	TRUE	22187	Ubb	Ubb
TCONS_00022791	0.00352633	3.75332	-10.0558	0.00026083	0.036167	TRUE	319720	9630028I04Rik	9630028I04Rik
NM_001198984.1	0.000519667	2.34479	-12.1396	0.000364199	0.039163	TRUE	21453	Tcof1	Tcof1
NM_009091.2	0.00757433	197.308	-14.669	7.44684e-06	0.0151035	TRUE	20054	Rps15	Rps15

## Sheet: HyperTH vs HypoTH
Transcript	HyperTH GROUP value	HypoTH GROUP value	log2foldchange	pvalue	qvalue	significance	gene_id	gene_name	gene_description
NM_001110843.1	5.55837	0	Inf	9.14502e-06	0.00809735	TRUE	12293	Cacna2d1	Cacna2d1		Upregulated
TCONS_00007517	1.85049	0	Inf	2.45597e-05	0.0102335	TRUE	269643	Ppp2r2c	Ppp2r2c		Downregulated
NM_001017968.2	7.04896	0	Inf	5.36214e-05	0.011849	TRUE	503610	Zdhhc18	Zdhhc18
XM_030252132.1	37.1869	0	Inf	0.000115851	0.011849	TRUE	74182	Gpcpd1	Gpcpd1
TCONS_00022825	2.27339	0	Inf	0.000284564	0.0132564	TRUE	74762	Mdga1	Mdga1
XM_036157871.1	2.08717	0	Inf	0.000311552	0.0139803	TRUE	16553	Kif13a	Kif13a
TCONS_00019414	13.8277	0	Inf	0.000424714	0.0168243	TRUE	102633419	Gm31251	Gm31251
TCONS_00019411	25.7374	0	Inf	0.000432886	0.0168945	TRUE	102633419	Gm31251	Gm31251
XM_036158471.1	9.9772	0	Inf	0.000540643	0.0191482	TRUE	15460	Hr	Hr
XR_004942975.1	4.29415	0	Inf	0.000832311	0.0241132	TRUE	320727	Ipo8	Ipo8
TCONS_00008669	1.81079	0	Inf	0.00105852	0.0274983	TRUE	667277	C1rb	C1rb
XM_030253140.2	3.26466	0	Inf	0.00129193	0.0301528	TRUE	12540	Cdc42	Cdc42
XM_006500279.4	45.3253	0	Inf	0.00141851	0.0320001	TRUE	74182	Gpcpd1	Gpcpd1
TCONS_00022263	2.76563	0	Inf	0.00143746	0.0322223	TRUE	118568331	LOC118568331	LOC118568331
TCONS_00015405	2.3686	0	Inf	0.00183735	0.0365073	TRUE	72947	Phykpl	Phykpl
NM_026732.3	43.6589	3.3e-05	20.3354	1.80419e-05	0.00898899	TRUE	68463	Mrpl14	Mrpl14
TCONS_00006584	13.8311	0.00470467	11.5215	1.62786e-05	0.00898899	TRUE	12293	Cacna2d1	Cacna2d1
XM_006532843.2	4.0953	0.00190133	11.0727	0.000944224	0.0260079	TRUE	216739	Acsl6	Acsl6
XM_030243292.2	4.38843	0.005714	9.58499	0.00282564	0.046332	TRUE	14339	Aktip	Aktip
TCONS_00024704	3.67823	0.00691633	9.05479	0.000809693	0.0236514	TRUE	102639019	Gm35438	Gm35438
NM_027445.3	11.86	0.0243333	8.92895	3.41099e-05	0.0109036	TRUE	70510	Rnf167	Rnf167
TCONS_00013019	2.46551	0.005822	8.72616	0.0012027	0.0291759	TRUE	102633035	Gm28979	Gm28979
TCONS_00004267	13.9791	0.038387	8.50844	4.5322e-05	0.011849	TRUE	102634333	1110002E22Rik	1110002E22Rik
XM_036165449.1	10.45	0.0468257	7.80199	2.65957e-05	0.0104662	TRUE	68095	Ociad1	Ociad1
NM_144544.2	14.0275	0.091573	7.25911	0.000181365	0.011849	TRUE	78354	Lypd8l	Lypd8l
XR_376823.5	7.14434	0.04694	7.24984	0.000582696	0.0198239	TRUE	68095	Ociad1	Ociad1
TCONS_00001279	5.41465	0.03601	7.23233	0.00192567	0.0375518	TRUE	226432	Ipo9	Ipo9
NM_001365015.1	5.10764	0.034765	7.19888	0.000396087	0.0162795	TRUE	225341	Lims2	Lims2
XR_003950992.1	3.03919	0.0234093	7.02046	0.000230314	0.0120256	TRUE	115488289	Gm52092	Gm52092
NR_166471.1	7.14892	0.057763	6.95144	0.000112968	0.011849	TRUE	402730	Foxo6os	Foxo6os
rna-Mir208a.1	15.5066	0.126388	6.93888	0.000478709	0.017847	TRUE	387204	Mir208a	Mir208a
TCONS_00018796	19.0763	0.16009	6.89676	0.000345803	0.0149816	TRUE	16553	Kif13a	Kif13a
TCONS_00013701	5.23642	0.0495783	6.72273	8.68293e-05	0.011849	TRUE	102633237	Gm31114	Gm31114
NR_029724.1	11.3561	0.113541	6.64412	0.000563743	0.0196713	TRUE	387204	Mir208a	Mir208a
XM_006522657.4	52.1477	0.532559	6.61352	0.00118984	0.0291125	TRUE	74143	Opa1	Opa1
TCONS_00001032	45.687	0.543971	6.39211	0.000464811	0.017514	TRUE	21961	Tns1	Tns1
XM_030251356.1	38.0868	0.46166	6.36632	4.29809e-05	0.011849	TRUE	26549	Itgb1bp2	Itgb1bp2
XR_001784740.3	7.4082	0.114715	6.013	0.000685271	0.02129	TRUE	68095	Ociad1	Ociad1
TCONS_00009768	5.80375	0.092506	5.9713	0.000875541	0.0248661	TRUE	78286	Nav2	Nav2
TCONS_00006625	3.44876	0.0633467	5.76666	0.00164198	0.0341585	TRUE	20535	Slc4a2	Slc4a2
NM_022982.3	12.0169	0.249942	5.58733	0.000609058	0.0199437	TRUE	65079	Rtn4r	Rtn4r
NM_177694.6	3.85376	0.082852	5.53959	0.000507885	0.0186404	TRUE	233246	Ano5	Ano5
NM_008226.2	20.8032	0.545519	5.25303	9.63011e-05	0.011849	TRUE	15166	Hcn2	Hcn2
NM_019568.2	13.4021	0.355125	5.23799	0.000645032	0.0206279	TRUE	57266	Cxcl14	Cxcl14
NM_001293772.2	35.5179	1.16907	4.92511	5.52548e-07	0.00539962	TRUE	72333	Palld	Palld
NM_008663.2	2.93167	0.100171	4.87119	0.00182502	0.0363643	TRUE	17921	Myo7a	Myo7a
XR_869605.4	7.12145	0.245065	4.86093	0.00260748	0.0441014	TRUE	232536	Mrps35	Mrps35
XR_004936675.1	2.76931	0.098726	4.80995	0.0023354	0.0417222	TRUE	103988	Gck	Gck
NM_001360151.1	3.38262	0.127893	4.72513	0.000270364	0.0130281	TRUE	93692	Glrx	Glrx
NM_001287386.1	17.4584	0.702027	4.63625	0.000803333	0.0235141	TRUE	103988	Gck	Gck
NM_001159564.1	7.27284	0.301014	4.59462	0.000133564	0.011849	TRUE	16420	Itgb6	Itgb6
NM_145541.5	15.3453	0.71136	4.43107	0.00178106	0.0357724	TRUE	109905	Rap1a	Rap1a
XM_036161518.1	43.687	2.02854	4.42869	3.29608e-05	0.0109036	TRUE	22359	Vldlr	Vldlr
NM_001013390.3	45.134	2.15251	4.39012	0.000262235	0.0127318	TRUE	399548	Scn4b	Scn4b
XR_378779.5	5.2938	0.265745	4.31619	0.000373829	0.0158572	TRUE	18970	Polb	Polb
NM_023695.3	1.96937	0.101835	4.27342	0.000182741	0.011849	TRUE	12960	Crybb1	Crybb1
TCONS_00019203	8.06962	0.419072	4.26723	0.00289937	0.0471589	TRUE	142687	Asb14	Asb14
TCONS_00015237	5.17101	0.308491	4.06715	0.000193886	0.011849	TRUE	103988	Gck	Gck
TCONS_00022683	4.5466	0.272189	4.06211	0.0015752	0.0335072	TRUE	68799	Rgmb	Rgmb
NM_001379355.1	5.88743	0.378303	3.96002	0.00176546	0.0355779	TRUE	68428	Steap3	Steap3
NM_001347446.1	17.6916	1.16147	3.92903	0.000121578	0.011849	TRUE	94089	Trim7	Trim7
TCONS_00006884	36.0841	2.55948	3.81744	0.00233372	0.0417222	TRUE	109979	Art3	Art3
NM_001167861.2	5.10764	0.367287	3.79768	0.000615083	0.0200319	TRUE	330319	Wipf3	Wipf3
TCONS_00011709	4.323	0.316743	3.77065	7.22792e-05	0.011849	TRUE	68051	Nutf2	Nutf2
NM_001110844.1	8.32547	0.631283	3.72117	0.00070435	0.0216341	TRUE	12293	Cacna2d1	Cacna2d1
XM_017312968.3	7.58232	0.581775	3.70411	0.000522963	0.0189037	TRUE	80914	Uck2	Uck2
XM_030243604.2	3.12627	0.243176	3.68437	0.00252469	0.0436186	TRUE	319518	Pdpr	Pdpr
TCONS_00011571	3.55548	0.278376	3.67494	0.00023727	0.012135	TRUE	619292	G430095P16Rik	G430095P16Rik
NM_134420.4	5.13568	0.408555	3.65195	0.000952805	0.0260422	TRUE	171429	Slc26a6	Slc26a6
NR_040309.1	3.4037	0.273044	3.6399	0.00104853	0.027401	TRUE	69659	2310069G16Rik	2310069G16Rik
NM_007621.2	19.248	1.55125	3.6332	0.000116237	0.011849	TRUE	12409	Cbr2	Cbr2
XM_011246907.4	2.82133	0.244451	3.52876	0.000602523	0.0199437	TRUE	225651	Mppe1	Mppe1
NM_008850.2	12.0584	1.04784	3.52454	0.00240233	0.0424412	TRUE	18738	Pitpna	Pitpna
NM_145401.2	3.05641	0.26636	3.52039	0.000663898	0.0209475	TRUE	108099	Prkag2	Prkag2
NM_173866.4	15.5947	1.46859	3.40854	0.000996956	0.0266488	TRUE	108682	Gpt2	Gpt2
NR_166847.1	9.90537	0.943594	3.39197	0.00211672	0.0395093	TRUE	102639588	Gm11967	Gm11967
NM_053200.2	65.0596	6.24929	3.38	0.000597294	0.0199437	TRUE	104158	Ces1d	Ces1d
NM_001109910.1	2.51714	0.241925	3.37916	5.09413e-05	0.011849	TRUE	83701	Srrt	Srrt
NM_009784.2	6.46788	0.657135	3.29903	0.000209634	0.011849	TRUE	12293	Cacna2d1	Cacna2d1
NM_011110.4	13.1638	1.3563	3.27883	0.000137372	0.011849	TRUE	18784	Pla2g5	Pla2g5
NM_133719.2	21.7912	2.29562	3.24679	0.00112883	0.0281926	TRUE	70083	Metrn	Metrn
NR_151661.1	12.5795	1.38186	3.1864	0.00128123	0.0301014	TRUE	72085	Osgepl1	Osgepl1
TCONS_00023718	2.24436	0.249622	3.16848	0.00301679	0.0480212	TRUE	574402	Gpr17	Gpr17
XR_380324.2	2.30774	0.259223	3.15422	4.58936e-06	0.00722416	TRUE	102640859	Gm36827	Gm36827
NM_173027.2	7.73016	0.869752	3.15182	0.00152508	0.0331249	TRUE	271424	Ip6k3	Ip6k3
TCONS_00011662	3.60398	0.406057	3.14984	0.000162146	0.011849	TRUE	664947	Gm7418	Gm7418
TCONS_00013920	5.17837	0.595973	3.11918	0.00126708	0.0299678	TRUE	235682	Zfp445	Zfp445
TCONS_00011998	3.73964	0.445017	3.07097	0.000419651	0.0167598	TRUE	100504714	Gm16793	Gm16793
NM_175515.5	11.9469	1.45884	3.03374	0.000100087	0.011849	TRUE	380614	Intu	Intu
XM_036162750.1	4.28989	0.538524	2.99386	0.000131777	0.011849	TRUE	99031	Osbpl6	Osbpl6
XM_006540332.4	15.5386	2.04257	2.9274	0.00022864	0.0120256	TRUE	68188	Sympk	Sympk
TCONS_00015187	3.20435	0.423131	2.92086	0.000141349	0.011849	TRUE	19682	Rdh5	Rdh5
NM_183179.1	3.68252	0.490782	2.90754	0.00268645	0.0449153	TRUE	240595	Kcnv2	Kcnv2
XM_006514982.5	21.3459	2.91498	2.8724	0.000909637	0.0254681	TRUE	14245	Lpin1	Lpin1
TCONS_00019737	5.22398	0.716188	2.86674	0.000684005	0.02129	TRUE	115488338	Gm52134	Gm52134
NM_133778.2	10.0177	1.39379	2.84546	0.00196956	0.0378257	TRUE	78408	Fam131a	Fam131a
TCONS_00002848	2.08852	0.298959	2.80446	0.0030045	0.0479264	TRUE	171171	Ntng2	Ntng2
XM_036162959.1	16.611	2.38557	2.79974	0.000196089	0.011849	TRUE	19299	Abcd3	Abcd3
TCONS_00018645	31.0669	4.54431	2.77324	0.000120377	0.011849	TRUE	238505	Mtr	Mtr
TCONS_00003556	7.85735	1.20284	2.7076	0.000504434	0.0185619	TRUE	18830	Pltp	Pltp
NM_178045.4	2.94432	0.459439	2.67999	0.00253891	0.0436594	TRUE	213391	Rassf4	Rassf4
TCONS_00023473	3.68991	0.585867	2.65494	1.76004e-05	0.00898899	TRUE	106869	Tnfaip8	Tnfaip8
NM_001252570.1	22.4323	3.5729	2.65041	0.000117919	0.011849	TRUE	227696	Phyhd1	Phyhd1
XR_001781089.1	2.22399	0.355857	2.64378	0.00175548	0.0354634	TRUE	12153	Bmp1	Bmp1
NM_172862.3	2.75139	0.440342	2.64346	0.000706243	0.0216341	TRUE	242022	Frem2	Frem2
NM_026421.3	3.09198	0.508592	2.60395	0.00110222	0.0280538	TRUE	67870	Enoph1	Enoph1
TCONS_00006700	4.63032	0.7941	2.54372	0.0032232	0.0496338	TRUE	115490103	Gm30708	Gm30708
XM_030245233.1	5.79849	0.998395	2.53799	0.00115731	0.0286637	TRUE	67345	Herc4	Herc4
NM_017379.2	70.4804	12.6205	2.48145	0.000448733	0.017275	TRUE	53857	Tuba8	Tuba8
NR_028276.2	20.0701	3.59553	2.48077	0.00263438	0.0444112	TRUE	108637	Snord14c	Snord14c
NM_001348035.1	3.71205	0.667482	2.47542	0.00178269	0.0357724	TRUE	12465	Cct5	Cct5
TCONS_00015556	7.06589	1.274	2.47151	0.000193688	0.011849	TRUE	68460	Dhrs7c	Dhrs7c
NM_018758.2	14.5787	2.63837	2.46615	0.0011045	0.0280538	TRUE	57267	Apba3	Apba3
NM_001370902.1	7.60778	1.38907	2.45336	3.91995e-05	0.0115968	TRUE	665700	Hmcn2	Hmcn2
XR_001779774.2	3.46376	0.637569	2.44169	0.00187891	0.0369923	TRUE	102640859	Gm36827	Gm36827
NM_001008791.2	6.35529	1.17491	2.43541	0.000189827	0.011849	TRUE	73750	Whrn	Whrn
TCONS_00007655	4.38335	0.814027	2.42889	0.000201556	0.011849	TRUE	269113	Nup54	Nup54
NM_001081130.2	76.3348	14.1903	2.42743	0.000373849	0.0158572	TRUE	239017	Ogdhl	Ogdhl
NM_175398.4	13.7843	2.56575	2.42558	0.000824044	0.0239717	TRUE	109050	Inka2	Inka2
NM_028814.4	5.63096	1.05907	2.41059	0.000336136	0.0146524	TRUE	74200	Khdc4	Khdc4
NM_153484.3	18.8436	3.54891	2.40862	0.00060823	0.0199437	TRUE	21685	Tef	Tef
XM_006523400.4	5.61755	1.12057	2.32571	0.000348266	0.0150187	TRUE	106628	Trip10	Trip10
TCONS_00014197	4.56823	0.932611	2.29229	0.00112965	0.0281926	TRUE	11735	Ank3	Ank3
TCONS_00015770	3.62261	0.745147	2.28143	0.00305254	0.0483264	TRUE	327978	Slfn5	Slfn5
TCONS_00016353	4.64721	0.963433	2.27011	0.00264633	0.0444728	TRUE	66753	Erlec1	Erlec1
NM_001012477.2	41.9226	8.72303	2.26483	0.00250906	0.0434547	TRUE	20315	Cxcl12	Cxcl12
NM_001357820.1	153.912	32.2898	2.25295	0.000582375	0.0198239	TRUE	67268	Myl12a	Myl12a
NM_025806.2	25.2104	5.30956	2.24736	0.000871044	0.0248661	TRUE	66857	Plbd1	Plbd1
NM_009777.3	37.6967	7.98401	2.23925	0.0016616	0.034344	TRUE	12260	C1qb	C1qb
NM_153564.2	6.16046	1.3243	2.2178	0.00167029	0.034344	TRUE	229898	Gbp5	Gbp5
NM_010260.1	11.0655	2.3896	2.21123	0.00106173	0.0274983	TRUE	14469	Gbp2	Gbp2
TCONS_00011161	2.9288	0.641722	2.19029	0.0010044	0.0266966	TRUE	677289	Prr33	Prr33
XR_386629.3	4.21375	0.927016	2.18444	0.00165468	0.0342949	TRUE	102638787	Gm35268	Gm35268
NM_027756.5	5.56108	1.24104	2.16381	0.000430438	0.016892	TRUE	71306	Mfap3l	Mfap3l
NM_019578.2	10.5609	2.37027	2.15561	0.000948566	0.0260161	TRUE	56219	Extl1	Extl1
NM_019694.2	25.4967	5.73717	2.1519	0.000146779	0.011849	TRUE	56384	Letm1	Letm1
TCONS_00007914	12.9097	2.97927	2.11542	0.000423744	0.0168243	TRUE	75695	Rilpl1	Rilpl1
NR_168272.1	4.79058	1.1143	2.10406	0.00150214	0.0328408	TRUE	105246846	Gm42067	Gm42067
NR_045170.1	53.1293	12.3891	2.10044	0.000278123	0.0131339	TRUE	328186	Gm10336	Gm10336
XM_006516675.3	6.57695	1.54316	2.09153	0.000455933	0.0174103	TRUE	23986	Eci2	Eci2
XM_030247266.2	9.22489	2.18303	2.0792	0.00251218	0.0434555	TRUE	23986	Eci2	Eci2
NM_011677.2	6.75487	1.60334	2.07485	0.000916834	0.0256189	TRUE	22256	Ung	Ung
NM_001024606.2	14.6334	3.49019	2.06789	0.00110784	0.0280764	TRUE	382051	Pdp2	Pdp2
NM_009744.4	6.40698	1.54291	2.05399	0.000536643	0.0191482	TRUE	12053	Bcl6	Bcl6
NM_009779.2	3.10675	0.748602	2.05314	0.00198156	0.0379124	TRUE	12267	C3ar1	C3ar1
NM_181328.3	5.28174	1.29638	2.02652	0.00193551	0.0375621	TRUE	214663	Slc25a29	Slc25a29
NM_028105.4	3.00601	0.750733	2.00148	0.00286836	0.0468157	TRUE	72113	Adck1	Adck1
NM_001356474.1	6.28165	1.57616	1.99473	0.00122306	0.0294678	TRUE	70266	Kyat1	Kyat1
XM_006527253.5	15.335	3.91396	1.97013	5.40964e-05	0.011849	TRUE	66395	Ahnak	Ahnak
NM_178793.4	4.66364	1.19089	1.96941	0.00195321	0.0377505	TRUE	320924	Ccbe1	Ccbe1
NM_001013013.2	59.7653	15.5905	1.93864	3.26879e-05	0.0109036	TRUE	68460	Dhrs7c	Dhrs7c
NM_001291108.1	3.37779	0.885126	1.93213	0.00128775	0.0301049	TRUE	67068	Dynlrb1	Dynlrb1
NM_021281.3	11.8207	3.10838	1.92708	0.000641251	0.0205534	TRUE	13040	Ctss	Ctss
NM_198607.1	7.92607	2.09171	1.92192	0.00193056	0.0375518	TRUE	223626	Them6	Them6
XR_004933998.1	4.9074	1.2997	1.91678	0.00114436	0.0283926	TRUE	11870	Art1	Art1
NM_008035.2	7.03227	1.88108	1.90243	0.000147147	0.011849	TRUE	14276	Folr2	Folr2
XM_006535263.4	3.53851	0.952123	1.89392	3.87076e-05	0.0115968	TRUE	74596	Cds1	Cds1
NM_011923.4	28.8622	7.796	1.88838	0.000246813	0.0124434	TRUE	26360	Angptl2	Angptl2
NM_181325.4	4.43938	1.20821	1.87748	0.00066888	0.0210111	TRUE	18408	Slc25a15	Slc25a15
TCONS_00006399	6.07251	1.65346	1.8768	0.00174769	0.0353708	TRUE	213989	Tmem82	Tmem82
TCONS_00000656	15.6952	4.30694	1.86559	0.000543865	0.0192143	TRUE	115487369	LOC115487369	LOC115487369
NM_001348274.1	7.71527	2.12785	1.85832	0.00107387	0.0276308	TRUE	231134	Dok7	Dok7
NM_153136.5	4.78104	1.31867	1.85824	0.00059672	0.0199437	TRUE	213484	Nudt18	Nudt18
NM_019564.3	48.3373	13.9899	1.78875	6.08291e-05	0.011849	TRUE	56213	Htra1	Htra1
NM_001360582.1	4.95029	1.43504	1.78643	0.00121606	0.0293992	TRUE	65098	Zfand6	Zfand6
XM_036152626.1	49.2408	14.3826	1.77553	0.00172558	0.0350735	TRUE	12865	Cox7a1	Cox7a1
TCONS_00007116	4.83374	1.41953	1.76773	0.000458908	0.0174299	TRUE	76167	Snrnp35	Snrnp35
NM_009382.3	4.00042	1.18713	1.75268	0.00193232	0.0375518	TRUE	21838	Thy1	Thy1
NM_011851.4	5.20463	1.58298	1.71715	0.00210315	0.0393487	TRUE	23959	Nt5e	Nt5e
NM_009062.3	6.1042	1.8883	1.69271	0.0018282	0.0363766	TRUE	19736	Rgs4	Rgs4
TCONS_00022651	3.20602	0.996712	1.68553	0.00222422	0.0407016	TRUE	75060	4930506C21Rik	4930506C21Rik
TCONS_00011627	2.97951	0.92774	1.68328	5.41834e-05	0.011849	TRUE	109151	Chd9	Chd9
XM_006527268.4	7.12351	2.22921	1.67606	0.000398742	0.0162795	TRUE	66980	Zdhhc6	Zdhhc6
NM_134102.4	6.56255	2.07962	1.65794	0.00173072	0.0350773	TRUE	85031	Pla1a	Pla1a
NM_146152.3	24.3428	7.74344	1.65245	0.00283392	0.0464141	TRUE	230673	Ipo13	Ipo13
NM_018832.2	7.39892	2.37639	1.63855	0.00147171	0.0327246	TRUE	54634	Magix	Magix
NM_001033634.3	24.65	7.93958	1.63445	0.00064772	0.0206452	TRUE	414872	Zyg11b	Zyg11b
NM_013657.5	7.1266	2.30536	1.62822	0.00158434	0.0336513	TRUE	20348	Sema3c	Sema3c
TCONS_00018450	3.0797	0.997265	1.62674	0.00275725	0.0454454	TRUE	93692	Glrx	Glrx
NM_001164048.1	344.966	111.796	1.62559	0.000718227	0.0218102	TRUE	17189	Mb	Mb
NM_001374700.1	96.3105	31.3125	1.62095	0.000265676	0.0128458	TRUE	210582	Coq10a	Coq10a
NM_011396.3	11.2491	3.65855	1.62047	0.000581808	0.0198239	TRUE	20520	Slc22a5	Slc22a5
NM_027215.2	74.1805	24.244	1.61341	0.00116191	0.0286773	TRUE	69804	Tmem147	Tmem147
NM_001372342.1	4.10847	1.3434	1.61271	0.000560429	0.019604	TRUE	102141	Snx25	Snx25
NM_025557.1	49.4431	16.3196	1.59917	7.99887e-05	0.011849	TRUE	66425	Pcp4l1	Pcp4l1
TCONS_00023331	9.60999	3.18984	1.59105	0.000971503	0.0262404	TRUE	225341	Lims2	Lims2
NM_011671.5	22.7224	7.62895	1.57456	0.00309646	0.0487417	TRUE	22228	Ucp2	Ucp2
TCONS_00007078	375.296	127.76	1.55459	0.0015158	0.0330374	TRUE	56317	Anapc7	Anapc7
TCONS_00023435	2.98588	1.01878	1.55131	0.00270627	0.0450388	TRUE	545253	Gm5820	Gm5820
XM_006530492.5	14.5463	4.96386	1.55112	0.000155901	0.011849	TRUE	75695	Rilpl1	Rilpl1
NM_028784.3	23.5443	8.04171	1.5498	0.000959852	0.0261504	TRUE	74145	F13a1	F13a1
XM_036162964.1	3.58276	1.23243	1.53957	0.00189902	0.0372109	TRUE	19769	Rit1	Rit1
NM_007572.2	29.109	10.0228	1.53818	0.000874528	0.0248661	TRUE	12259	C1qa	C1qa
NM_027570.4	15.1931	5.24171	1.53531	0.00284081	0.0464731	TRUE	52815	Ldhd	Ldhd
TCONS_00017791	38.2282	13.2973	1.5235	0.00157431	0.0335072	TRUE	14245	Lpin1	Lpin1
NM_011436.4	2.80025	0.980742	1.51361	0.000432615	0.0168945	TRUE	20660	Sorl1	Sorl1
NM_001081236.1	8.82049	3.09024	1.51314	0.00010701	0.011849	TRUE	76792	Spring1	Spring1
NM_011716.2	33.705	11.8491	1.50819	0.000749011	0.0225226	TRUE	22393	Wfs1	Wfs1
XM_030252339.2	0	17.8796	#NAME?	2.71143e-06	0.00681592	TRUE	102634333	1110002E22Rik	1110002E22Rik
XM_036160261.1	0	1.87716	#NAME?	3.01708e-06	0.00681592	TRUE	110147	Ehmt2	Ehmt2
TCONS_00025574	0	122.684	#NAME?	3.8489e-06	0.00681592	TRUE	20102	Rps4x	Rps4x
TCONS_00024776	0	3.89536	#NAME?	8.32405e-06	0.00809735	TRUE	54132	Pdlim1	Pdlim1
NM_198092.2	0	3.70415	#NAME?	8.65854e-06	0.00809735	TRUE	53376	Usp2	Usp2
TCONS_00018958	0	2.77864	#NAME?	2.17079e-05	0.00961049	TRUE	211446	Exoc3	Exoc3
NM_009052.2	0	9.32657	#NAME?	5.84706e-05	0.011849	TRUE	19716	Bex1	Bex1
NM_001080131.2	0	2.27004	#NAME?	6.13974e-05	0.011849	TRUE	21917	Tmpo	Tmpo
XR_871656.2	0	5.33212	#NAME?	7.30634e-05	0.011849	TRUE	102640859	Gm36827	Gm36827
NM_001286641.1	0	2.28586	#NAME?	8.04807e-05	0.011849	TRUE	330941	AI593442	AI593442
NM_001372425.1	0	1.53412	#NAME?	8.94309e-05	0.011849	TRUE	234593	Ndrg4	Ndrg4
NM_177059.3	0	2.66003	#NAME?	0.000104916	0.011849	TRUE	320027	Fstl4	Fstl4
NM_001372423.1	0	3.06085	#NAME?	0.000143128	0.011849	TRUE	234593	Ndrg4	Ndrg4
TCONS_00001243	0	3.03869	#NAME?	0.000208101	0.011849	TRUE	70579	Zc3h11a	Zc3h11a
NM_001039512.1	0	5.9554	#NAME?	0.000208101	0.011849	TRUE	117198	Ivns1abp	Ivns1abp
TCONS_00002822	0	1.95082	#NAME?	0.000208101	0.011849	TRUE	67512	Agpat2	Agpat2
XM_011239446.4	0	3.2763	#NAME?	0.000208101	0.011849	TRUE	228026	Pdk1	Pdk1
TCONS_00003140	0	5.0012	#NAME?	0.000208101	0.011849	TRUE	12258	Serping1	Serping1
TCONS_00003435	0	14.8919	#NAME?	0.000208101	0.011849	TRUE	13010	Cst3	Cst3
TCONS_00005210	0	2.18464	#NAME?	0.000208101	0.011849	TRUE	21687	Tek	Tek
XM_030254092.2	0	2.06927	#NAME?	0.000208101	0.011849	TRUE	12589	Ift81	Ift81
TCONS_00007852	0	3.69736	#NAME?	0.000208101	0.011849	TRUE	59008	Anapc5	Anapc5
TCONS_00007156	0	2.32651	#NAME?	0.000208101	0.011849	TRUE	71970	Zbed5	Zbed5
TCONS_00008140	0	2.86225	#NAME?	0.000208101	0.011849	TRUE	12843	Col1a2	Col1a2
NM_001243052.1	0	2.21031	#NAME?	0.000208101	0.011849	TRUE	12036	Bcat2	Bcat2
TCONS_00010636	0	2.83748	#NAME?	0.000208101	0.011849	TRUE	19158	Cyth2	Cyth2
TCONS_00010867	0	11.3128	#NAME?	0.000208101	0.011849	TRUE	100503605	Hbb-bs	Hbb-bs
TCONS_00013369	0	2.1204	#NAME?	0.000208101	0.011849	TRUE	16430	Stt3a	Stt3a
XR_004935442.1	0	2.34563	#NAME?	0.000208101	0.011849	TRUE	270210	Zfp651	Zfp651
TCONS_00013940	0	4.89149	#NAME?	0.000208101	0.011849	TRUE	17281	Fyco1	Fyco1
TCONS_00014286	0	9.95205	#NAME?	0.000208101	0.011849	TRUE	75406	Ndufs7	Ndufs7
TCONS_00015185	0	4.31854	#NAME?	0.000208101	0.011849	TRUE	14533	Bloc1s1	Bloc1s1
TCONS_00016218	0	3.89182	#NAME?	0.000208101	0.011849	TRUE	18016	Nf2	Nf2
TCONS_00016414	0	2.84629	#NAME?	0.000208101	0.011849	TRUE	104625	Cnot6	Cnot6
TCONS_00016838	0	1.55373	#NAME?	0.000208101	0.011849	TRUE	67300	Cltc	Cltc
TCONS_00017437	0	2.51518	#NAME?	0.000208101	0.011849	TRUE	100101806	Srp54c	Srp54c
TCONS_00017959	0	1.97266	#NAME?	0.000208101	0.011849	TRUE	53612	Vti1b	Vti1b
TCONS_00018289	0	46.8104	#NAME?	0.000208101	0.011849	TRUE	109620	Dsp	Dsp
TCONS_00018780	0	4.50464	#NAME?	0.000208101	0.011849	TRUE	56705	Ranbp9	Ranbp9
TCONS_00019888	0	118.045	#NAME?	0.000208101	0.011849	TRUE	140781	Myh7	Myh7
TCONS_00019890	0	353.104	#NAME?	0.000208101	0.011849	TRUE	140781	Myh7	Myh7
TCONS_00020910	0	2.54478	#NAME?	0.000208101	0.011849	TRUE	223697	Sun2	Sun2
TCONS_00020940	0	4.26412	#NAME?	0.000208101	0.011849	TRUE	57259	Tob2	Tob2
XM_011245736.3	0	1.69055	#NAME?	0.000208101	0.011849	TRUE	72193	Scaf11	Scaf11
TCONS_00021414	0	3.22604	#NAME?	0.000208101	0.011849	TRUE	56637	Gsk3b	Gsk3b
XM_030250128.2	0	4.42943	#NAME?	0.000208101	0.011849	TRUE	75956	Srrm2	Srrm2
TCONS_00023091	0	3.0906	#NAME?	0.000208101	0.011849	TRUE	16549	Khsrp	Khsrp
XM_036161263.1	0	4.11472	#NAME?	0.000208101	0.011849	TRUE	67869	Paip2	Paip2
TCONS_00023739	0	1.93372	#NAME?	0.000208101	0.011849	TRUE	76594	Dnajc18	Dnajc18
XR_003952541.2	0	1.56024	#NAME?	0.000208101	0.011849	TRUE	70791	Hars2	Hars2
TCONS_00025736	0	16.9809	#NAME?	0.000208101	0.011849	TRUE	17725	mt-Rnr2	mt-Rnr2
TCONS_00025745	0	58.9059	#NAME?	0.000208101	0.011849	TRUE	17721	ND5	ND5
XM_006520375.5	0	7.40918	#NAME?	0.000215289	0.0119608	TRUE	12419	Cbx5	Cbx5
XM_006498882.3	0	107.806	#NAME?	0.000223547	0.0120256	TRUE	17868	Mybpc3	Mybpc3
XM_006511156.2	0	1.84218	#NAME?	0.000225398	0.0120256	TRUE	24127	Xrn1	Xrn1
NM_001130179.2	0	1.82418	#NAME?	0.000240191	0.0122402	TRUE	21956	Tnnt2	Tnnt2
XM_036165700.1	0	6.46645	#NAME?	0.000252332	0.0125803	TRUE	320404	Itpkb	Itpkb
XM_036158144.1	0	2.19166	#NAME?	0.000259638	0.0127318	TRUE	68675	Fam172a	Fam172a
NM_022879.2	0	4.26588	#NAME?	0.000262151	0.0127318	TRUE	17898	Myl7	Myl7
XM_006505871.4	0	11.8486	#NAME?	0.000348779	0.0150187	TRUE	21366	Slc6a6	Slc6a6
TCONS_00011063	0	1.86295	#NAME?	0.000394296	0.0162795	TRUE	21843	Tial1	Tial1
NM_001361607.1	0	323.831	#NAME?	0.000415833	0.0166887	TRUE	140781	Myh7	Myh7
NM_001310770.1	0	1.68838	#NAME?	0.000547881	0.0192601	TRUE	231889	Bud31	Bud31
NM_025540.2	0	2.86113	#NAME?	0.000658389	0.0208667	TRUE	66402	Sln	Sln
XM_030248670.2	0	2.14451	#NAME?	0.000713859	0.0217489	TRUE	56274	Stk3	Stk3
XM_011239802.3	0	2.42809	#NAME?	0.000829001	0.0240665	TRUE	73747	Shld1	Shld1
TCONS_00008676	0	7.7085	#NAME?	0.000976226	0.0262643	TRUE	14794	Spsb2	Spsb2
XM_036163810.1	0	1.75944	#NAME?	0.00117499	0.0288995	TRUE	18027	Nfia	Nfia
XM_006520307.4	0	2.08747	#NAME?	0.00137016	0.0314095	TRUE	11512	Adcy6	Adcy6
TCONS_00009249	0	5.64226	#NAME?	0.00156328	0.0335072	TRUE	12288	Cacna1c	Cacna1c
NM_001163332.1	0	3.51781	#NAME?	0.00164595	0.0341909	TRUE	80281	Cttnbp2nl	Cttnbp2nl
XM_036156645.1	0	3.07226	#NAME?	0.00215554	0.0399705	TRUE	22720	Zfp62	Zfp62
TCONS_00000513	0	2.94671	#NAME?	0.00241972	0.042621	TRUE	21952	Tnni1	Tnni1
XM_036155747.1	0	2.58266	#NAME?	0.00257583	0.0439661	TRUE	216190	Appl2	Appl2
NM_007428.4	0	2.24548	#NAME?	0.00291553	0.0472967	TRUE	11606	Agt	Agt
NM_020496.3	0.561424	1.58799	-1.50004	0.000600662	0.0199437	TRUE	57246	Tbx20	Tbx20
NM_011868.3	2.15113	6.15469	-1.51659	0.000651519	0.0206952	TRUE	23986	Eci2	Eci2
TCONS_00022406	2.55176	7.39614	-1.53528	0.000401731	0.0163075	TRUE	68463	Mrpl14	Mrpl14
NM_145704.2	9.20852	27.3589	-1.57097	0.00310875	0.0488808	TRUE	80906	Kcnip2	Kcnip2
NM_001362370.1	0.382161	1.14742	-1.58615	0.000604559	0.0199437	TRUE	81601	Kat5	Kat5
NM_175259.4	0.958241	2.88335	-1.58928	1.89192e-05	0.00898899	TRUE	77552	Shisa4	Shisa4
NM_019771.2	25.9171	78.1587	-1.5925	0.000176231	0.011849	TRUE	56431	Dstn	Dstn
NM_010402.4	10.1198	30.756	-1.60368	0.00213135	0.03973	TRUE	15111	Hand2	Hand2
TCONS_00019381	0.885623	2.76754	-1.64384	0.000972416	0.0262404	TRUE	268741	Tox4	Tox4
XM_006532481.5	0.874634	2.73496	-1.64477	0.00305773	0.0483264	TRUE	18626	Per1	Per1
NM_010865.3	1.44807	4.62467	-1.67522	0.000256376	0.0126996	TRUE	17926	Myoc	Myoc
XR_867957.2	1.073	3.43468	-1.67852	0.0013969	0.0316638	TRUE	105244634	Gm12701	Gm12701
NM_007982.2	0.671203	2.17258	-1.69458	0.00163597	0.0341585	TRUE	14083	Ptk2	Ptk2
XR_004941109.1	0.823174	2.67283	-1.6991	0.00289617	0.0471589	TRUE	118568566	LOC118568566	LOC118568566
NR_045269.2	0.949198	3.11666	-1.71522	0.00271694	0.0450713	TRUE	100503849	Sp3os	Sp3os
NR_166742.1	1.20794	3.96914	-1.71628	0.00243085	0.042621	TRUE	105246427	Gm41717	Gm41717
NM_177673.2	0.940088	3.10235	-1.72249	8.11368e-05	0.011849	TRUE	230967	Cep104	Cep104
NM_001127346.1	1.89839	6.35692	-1.74355	0.000426338	0.0168243	TRUE	75597	Ndufaf2	Ndufaf2
rna-Mir12181-2.1	13.0009	43.8513	-1.75401	0.00130298	0.0302611	TRUE	114482797	Mir12181	Mir12181
TCONS_00004589	0.687664	2.32507	-1.7575	0.000928627	0.025695	TRUE	74383	Ubap2l	Ubap2l
NM_001205076.1	0.74834	2.54809	-1.76765	0.000966321	0.0262258	TRUE	59091	Jph2	Jph2
NM_010217.2	13.8161	47.3045	-1.77562	0.00230935	0.0414133	TRUE	14219	Ccn2	Ccn2
XM_006533995.4	0.329796	1.20768	-1.87259	0.000397355	0.0162795	TRUE	67473	Slc47a1	Slc47a1
TCONS_00010647	0.656619	2.44528	-1.89687	0.00205183	0.0388094	TRUE	20927	Abcc8	Abcc8
NM_133985.2	1.89358	7.15914	-1.91867	0.00178092	0.0357724	TRUE	108737	Oxsr1	Oxsr1
XM_006532480.4	1.91073	7.51024	-1.97473	0.00293787	0.0475123	TRUE	18626	Per1	Per1
NM_176933.4	0.745019	2.95323	-1.98694	7.6233e-05	0.011849	TRUE	319520	Dusp4	Dusp4
NM_011582.3	0.728107	2.89576	-1.99172	8.22935e-05	0.011849	TRUE	21828	Thbs4	Thbs4
TCONS_00007881	0.532009	2.12216	-1.99601	0.00045144	0.0172853	TRUE	56430	Clip1	Clip1
NM_001010836.3	3.60128	14.5252	-2.01198	0.00259924	0.0441014	TRUE	333654	Ppp1r13l	Ppp1r13l
NM_009238.3	5.1395	21.1398	-2.04026	0.00111919	0.0281926	TRUE	20677	Sox4	Sox4
NM_007705.3	7.64136	31.8189	-2.05798	0.00261343	0.0441293	TRUE	12696	Cirbp	Cirbp
XR_880771.2	0.641111	2.68801	-2.06789	0.000464833	0.017514	TRUE	105247026	Gm42208	Gm42208
NM_198885.3	0.864914	3.6436	-2.07474	0.00294764	0.0475617	TRUE	20289	Scx	Scx
NM_170756.2	0.279105	1.19357	-2.09641	0.000387128	0.0160834	TRUE	263876	Spata2	Spata2
XM_006531612.4	0.463429	1.98441	-2.09829	0.00238941	0.0423663	TRUE	104401	Pcnx3	Pcnx3
NM_016685.2	0.428903	1.86764	-2.12249	0.00134401	0.0310108	TRUE	12845	Comp	Comp
NM_019581.3	0.704575	3.06818	-2.12256	0.000137375	0.011849	TRUE	56055	Gtpbp2	Gtpbp2
TCONS_00025051	0.579814	2.5299	-2.12542	0.00094544	0.0260079	TRUE	66158	Rtl8a	Rtl8a
XM_036155419.1	0.21672	0.992394	-2.19508	0.000148512	0.011849	TRUE	84585	Rnf123	Rnf123
TCONS_00003039	0.955493	4.39339	-2.20102	0.00314638	0.0490911	TRUE	53416	Stk39	Stk39
NM_199029.2	0.873976	4.10068	-2.2302	8.95514e-05	0.011849	TRUE	380912	Zfp395	Zfp395
TCONS_00025739	312.433	1477.49	-2.24153	0.00119615	0.0291166	TRUE	17708	COX1	COX1
XM_006502822.4	0.202777	0.962126	-2.24633	0.000335845	0.0146524	TRUE	17346	Mknk1	Mknk1
XM_036154308.1	0.639152	3.04737	-2.25334	0.00253677	0.0436594	TRUE	72333	Palld	Palld
NR_168057.1	0.547646	2.62315	-2.25998	0.000854131	0.0245945	TRUE	665054	D330025C20Rik	D330025C20Rik
NM_145447.2	0.565025	2.72949	-2.27225	0.000769372	0.0228985	TRUE	217721	Flvcr2	Flvcr2
XM_006504075.4	2.63734	12.8027	-2.27929	0.00047195	0.0177351	TRUE	68095	Ociad1	Ociad1
TCONS_00023161	1.8731	9.25986	-2.30556	0.00191355	0.037392	TRUE	320473	Heatr5b	Heatr5b
rna-mt-Rnr2.1	1658	8274.43	-2.31922	0.00186185	0.0368391	TRUE	17725	mt-Rnr2	mt-Rnr2
XM_017320873.1	0.81803	4.22077	-2.36728	0.00250166	0.0433794	TRUE	231803	Mepce	Mepce
TCONS_00008302	0.48187	2.58984	-2.42615	0.00242813	0.042621	TRUE	XLOC_004874	LORF2	LINE-1 retrotransposable element ORF2 protein
XM_006526714.5	0.172179	0.9265	-2.42788	0.00148028	0.0328187	TRUE	16452	Jak2	Jak2
NM_033322.3	0.252209	1.35882	-2.42966	0.000922965	0.0256889	TRUE	93730	Lztfl1	Lztfl1
NM_026518.4	0.33629	1.86842	-2.47404	0.00023034	0.0120256	TRUE	68031	Rnf146	Rnf146
TCONS_00022541	0.301656	1.68324	-2.48026	0.000536853	0.0191482	TRUE	225010	Lclat1	Lclat1
NM_001037493.2	5.48618	31.0642	-2.50138	0.00106131	0.0274983	TRUE	71699	Slc41a3	Slc41a3
NR_015601.1	0.71075	4.03274	-2.50435	0.000170868	0.011849	TRUE	68128	Fam120aos	Fam120aos
NM_029182.1	0.912002	5.28095	-2.53369	0.000206413	0.011849	TRUE	75141	Rasd2	Rasd2
NR_131913.1	0.373112	2.21895	-2.57219	7.62281e-07	0.00539962	TRUE	100996933	Lincred1	Lincred1
XM_011241067.2	0.341589	2.13166	-2.64164	0.000149829	0.011849	TRUE	320609	Strip2	Strip2
XR_383136.4	0.351131	2.20471	-2.65051	0.00230133	0.0414115	TRUE	12153	Bmp1	Bmp1
NM_198250.1	2.81968	18.2669	-2.69563	0.00201244	0.0383202	TRUE	272381	Lrrc4b	Lrrc4b
NM_028802.3	0.344744	2.26696	-2.71716	0.00154631	0.0333696	TRUE	74182	Gpcpd1	Gpcpd1
XM_006522740.5	0.427643	2.84562	-2.73427	0.000198822	0.011849	TRUE	78408	Fam131a	Fam131a
XR_003953689.2	0.142391	0.953743	-2.74374	0.00117371	0.0288995	TRUE	665700	Hmcn2	Hmcn2
NM_001033302.2	1.04408	7.10401	-2.7664	0.000662894	0.0209475	TRUE	229599	Ciart	Ciart
XM_006539145.5	0.184451	1.30383	-2.82145	0.000308043	0.0139803	TRUE	68703	Rere	Rere
XM_036156352.1	0.49659	3.61725	-2.86477	0.0016394	0.0341585	TRUE	16562	Kif1c	Kif1c
NM_001291052.1	0.252488	1.84103	-2.86623	0.001666	0.034344	TRUE	74182	Gpcpd1	Gpcpd1
TCONS_00007657	1.09006	8.33987	-2.93561	0.000503473	0.0185619	TRUE	12492	Scarb2	Scarb2
XM_036155983.1	0.742536	5.72185	-2.94595	0.000750383	0.0225226	TRUE	69288	Rhobtb1	Rhobtb1
TCONS_00022839	0.240581	1.86374	-2.9536	0.00196092	0.0378189	TRUE	57261	Brd4	Brd4
XR_004934742.1	0.109625	0.928499	-3.08233	0.00143535	0.0322223	TRUE	102141	Snx25	Snx25
XM_006528007.3	0.108373	0.927926	-3.09801	0.00240261	0.0424412	TRUE	236920	Stard8	Stard8
TCONS_00025285	0.266648	2.43217	-3.18923	0.00147373	0.0327246	TRUE	58194	Sh3kbp1	Sh3kbp1
TCONS_00002259	0.30301	2.85441	-3.23575	0.00123423	0.0296362	TRUE	78655	Eif3j1	Eif3j1
XM_006509503.3	1.53337	14.8235	-3.27312	0.00175727	0.0354634	TRUE	72333	Palld	Palld
TCONS_00008925	0.408359	3.95577	-3.27605	0.00108086	0.0276399	TRUE	14548	Mrps33	Mrps33
NM_173753.4	0.672583	6.5177	-3.27658	0.000648488	0.0206452	TRUE	216742	Fnip1	Fnip1
TCONS_00008206	0.226742	2.22031	-3.29164	0.00171893	0.0349886	TRUE	319757	Smo	Smo
XM_006511438.5	0.101053	1.00255	-3.31049	0.00028316	0.0132394	TRUE	70549	Tln2	Tln2
NM_145991.2	0.353721	3.55633	-3.32971	0.000125934	0.011849	TRUE	214498	Cdc73	Cdc73
NM_001355651.1	0.196427	1.98661	-3.33825	3.46341e-05	0.0109036	TRUE	74182	Gpcpd1	Gpcpd1
XM_011238527.4	0.130446	1.37408	-3.39694	0.00227693	0.041197	TRUE	269198	Nbeal1	Nbeal1
NM_026543.3	0.158959	1.82799	-3.52353	0.00118326	0.0290023	TRUE	68067	Mrnip	Mrnip
TCONS_00012709	0.156424	1.94385	-3.63538	0.000218389	0.0119919	TRUE	80288	Bcl9l	Bcl9l
NM_008951.2	0.632981	7.8849	-3.63886	0.000121246	0.011849	TRUE	19185	Psmd4	Psmd4
XM_036158779.1	0.085711	1.0889	-3.66725	3.06078e-05	0.0109036	TRUE	64652	Nisch	Nisch
XM_036156491.1	0.197524	2.73364	-3.79072	0.00272479	0.0451143	TRUE	20787	Srebf1	Srebf1
NM_133752.3	0.524803	7.41396	-3.8204	0.00128421	0.0301049	TRUE	74143	Opa1	Opa1
rna-TrnV.1	0.669243	9.72676	-3.86136	0.00295542	0.0476331	TRUE	17745	TrnV	TrnV
NM_001359370.1	0.0925387	1.34815	-3.86478	0.000450055	0.0172789	TRUE	69940	Exoc1	Exoc1
XM_017320880.3	0.0706213	1.07926	-3.9338	0.000364773	0.0156125	TRUE	242894	Actr3b	Actr3b
XM_030255054.2	0.144852	2.22367	-3.94029	0.00298972	0.0478052	TRUE	107932	Chd4	Chd4
XM_006522654.4	0.437384	6.77251	-3.95272	0.000882794	0.0249632	TRUE	74143	Opa1	Opa1
XM_017317866.3	0.119621	1.86033	-3.95902	0.00123663	0.0296436	TRUE	225131	Wac	Wac
NM_001199177.1	0.794468	12.6857	-3.99707	0.00100215	0.026687	TRUE	74143	Opa1	Opa1
NM_001169577.1	0.0879423	1.41218	-4.00523	0.000335305	0.0146524	TRUE	22214	Ube2h	Ube2h
TCONS_00006577	0.15943	2.6807	-4.07162	0.000700791	0.0216299	TRUE	102638616	Gm35139	Gm35139
NR_033503.1	0.0857537	1.51838	-4.14619	0.00156036	0.0335072	TRUE	320301	E530011L22Rik	E530011L22Rik
TCONS_00015404	0.112385	1.99484	-4.14975	0.000153106	0.011849	TRUE	72947	Phykpl	Phykpl
NM_001291835.1	0.0961463	1.86164	-4.2752	0.00071895	0.0218102	TRUE	11655	Alas1	Alas1
XM_006527801.2	0.0687997	1.44912	-4.39663	0.000106297	0.011849	TRUE	14199	Fhl1	Fhl1
NM_027113.2	0.10686	2.3334	-4.44864	0.00157443	0.0335072	TRUE	69544	Wdr5b	Wdr5b
XM_006538928.1	0.05798	1.47928	-4.67319	2.44008e-05	0.0102335	TRUE	269608	Plekhg5	Plekhg5
NM_010321.1	0.170077	4.37084	-4.68365	0.00216617	0.0400105	TRUE	14711	Gnmt	Gnmt
TCONS_00015593	0.0451917	1.18482	-4.71246	7.03835e-05	0.011849	TRUE	56310	Gps2	Gps2
XM_011245735.2	0.0662103	1.75448	-4.72784	0.000969008	0.0262404	TRUE	71919	Rpap3	Rpap3
TCONS_00006284	0.0848993	2.25906	-4.73383	0.0013331	0.0308596	TRUE	503610	Zdhhc18	Zdhhc18
XM_006511665.5	0.0735617	2.21499	-4.9122	0.000737048	0.0222639	TRUE	20347	Sema3b	Sema3b
TCONS_00016650	0.356588	12.2909	-5.10719	6.66118e-05	0.011849	TRUE	13681	Eif4a1	Eif4a1
XM_036163391.1	0.0414963	1.4673	-5.14403	0.000301881	0.0138406	TRUE	76295	Atp11b	Atp11b
XM_036162938.1	0.0347313	1.25413	-5.17431	0.000308924	0.0139803	TRUE	18720	Pip5k1a	Pip5k1a
XM_036162252.1	0.0243943	0.896072	-5.199	0.000117506	0.011849	TRUE	27103	Eif2ak4	Eif2ak4
XM_011245729.1	0.0370433	1.37594	-5.21506	0.000304843	0.0138865	TRUE	71474	Ppp6r2	Ppp6r2
NM_026532.4	0.229717	8.97596	-5.28814	0.00313394	0.049005	TRUE	68051	Nutf2	Nutf2
NM_001374656.1	0.09835	4.32228	-5.45772	0.000928627	0.025695	TRUE	330938	Dixdc1	Dixdc1
NM_133664.3	0.048709	2.17237	-5.47894	1.71299e-06	0.00606699	TRUE	16763	Lad1	Lad1
XM_006518778.1	0.021746	0.97065	-5.48013	0.00024897	0.0125076	TRUE	211922	Dennd6a	Dennd6a
TCONS_00001310	0.104025	5.00249	-5.58765	3.08487e-05	0.0109036	TRUE	12628	Cfh	Cfh
TCONS_00008450	0.0243883	1.19965	-5.62028	0.000147072	0.011849	TRUE	232157	Mob1a	Mob1a
TCONS_00022784	0.0232163	1.14633	-5.62574	0.000118489	0.011849	TRUE	18091	Nkx2-5	Nkx2-5
NM_001362456.1	0.083644	4.13095	-5.62607	0.00052909	0.0190728	TRUE	16509	Kcne1	Kcne1
NM_029436.3	0.247428	12.2514	-5.6298	1.70221e-05	0.00898899	TRUE	75785	Klhl24	Klhl24
XM_036156454.1	0.0210997	1.04576	-5.63119	0.000285407	0.0132564	TRUE	19345	Rab5c	Rab5c
XM_030243724.1	0.0461117	2.38203	-5.69092	6.62482e-05	0.011849	TRUE	80914	Uck2	Uck2
XR_004941278.1	0.0177673	0.940819	-5.72662	0.000135159	0.011849	TRUE	14466	Gba	Gba
NR_151627.1	0.033461	1.84842	-5.78767	0.000101514	0.011849	TRUE	76295	Atp11b	Atp11b
NM_001355755.1	0.163441	9.13829	-5.80508	1.67772e-05	0.00898899	TRUE	17896	Myl4	Myl4
NM_001080812.1	0.0650127	3.77254	-5.85867	0.00081675	0.0238084	TRUE	234421	Cib3	Cib3
TCONS_00019895	6.98541	413.307	-5.88672	0.0011417	0.0283763	TRUE	140781	Myh7	Myh7
NM_001360002.1	0.0252547	1.57024	-5.95829	0.000483067	0.0179152	TRUE	228026	Pdk1	Pdk1
TCONS_00000331	0.0155523	1.00315	-6.01126	0.000242995	0.0123388	TRUE	347722	Agap1	Agap1
NM_010664.2	0.027038	1.77298	-6.03505	0.00227533	0.041197	TRUE	16668	Krt18	Krt18
TCONS_00022664	0.0315017	2.14072	-6.08653	0.00110496	0.0280538	TRUE	16004	Igf2r	Igf2r
NM_011130.2	0.106074	7.27437	-6.09968	0.000143192	0.011849	TRUE	18970	Polb	Polb
TCONS_00021604	0.013365	0.954189	-6.15774	0.000279953	0.0131685	TRUE	66626	Cdip1	Cdip1
NM_199468.2	0.0317567	2.36875	-6.22092	1.83755e-05	0.00898899	TRUE	213436	Rtl3	Rtl3
XM_030248280.2	0.0235687	1.77038	-6.23104	0.000785551	0.0231852	TRUE	11512	Adcy6	Adcy6
NM_001359172.1	0.0243827	1.83794	-6.23609	0.00101558	0.0268837	TRUE	20817	Srpk2	Srpk2
XR_374419.4	0.0113513	0.86038	-6.24404	0.000165197	0.011849	TRUE	16569	Kif3b	Kif3b
TCONS_00025226	0.030045	2.42359	-6.33388	0.000159358	0.011849	TRUE	12830	Col4a5	Col4a5
NM_011207.2	0.0298263	2.85143	-6.57895	5.67792e-05	0.011849	TRUE	545622	Ptpn3	Ptpn3
XM_006500784.4	0.0240483	2.34219	-6.60578	0.00298096	0.047773	TRUE	269424	Jade1	Jade1
NM_010549.3	0.029209	3.03172	-6.69758	0.000243985	0.0123448	TRUE	16157	Il11ra1	Il11ra1
NM_001081242.2	0.0245157	2.63951	-6.75042	0.000142942	0.011849	TRUE	70549	Tln2	Tln2
XM_006507190.5	0.00831833	0.948102	-6.8326	0.000230886	0.0120256	TRUE	109264	Me3	Me3
XM_036158835.1	0.06402	7.3498	-6.84304	0.000136632	0.011849	TRUE	68059	Tm9sf2	Tm9sf2
TCONS_00023584	0.0189157	2.1864	-6.85283	0.000408646	0.0164937	TRUE	319195	Rpl17	Rpl17
TCONS_00014560	0.00696433	0.884197	-6.98824	0.000218168	0.0119919	TRUE	381990	Zbtb2	Zbtb2
TCONS_00024982	0.0341417	4.42644	-7.01847	0.000565246	0.0196753	TRUE	22284	Usp9x	Usp9x
XM_036159861.1	0.00772867	1.02763	-7.05489	0.00267121	0.0448378	TRUE	209018	Vps8	Vps8
XM_011239063.3	0.006683	0.967055	-7.17696	0.000213459	0.0119058	TRUE	227634	Camsap1	Camsap1
XM_030252177.1	0.006527	0.973518	-7.22064	0.000273013	0.0130854	TRUE	18484	Pam	Pam
NM_001130165.2	0.014798	2.56766	-7.43891	0.000177853	0.011849	TRUE	170719	Oxr1	Oxr1
NM_026605.2	0.084507	14.8845	-7.46053	5.32149e-05	0.011849	TRUE	68188	Sympk	Sympk
XM_030250546.2	0.00943533	1.70533	-7.49777	0.000179154	0.011849	TRUE	56386	B4galt6	B4galt6
XM_036158576.1	0.272234	55.2126	-7.66401	1.96696e-05	0.00898899	TRUE	22070	Tpt1	Tpt1
TCONS_00005890	0.007847	1.65025	-7.71633	0.000222374	0.0120256	TRUE	269529	Fbxo10	Fbxo10
XR_001783189.3	0.00429567	0.918587	-7.74039	0.000277923	0.0131339	TRUE	18557	Cdk18	Cdk18
TCONS_00013489	0.00558833	1.23235	-7.78477	0.000152409	0.011849	TRUE	75717	Cul5	Cul5
XM_036157326.1	0.00898367	1.99876	-7.79759	0.00209559	0.039337	TRUE	217708	Lin52	Lin52
TCONS_00011942	0.0926427	20.734	-7.80611	0.00018892	0.011849	TRUE	22335	Vdac3	Vdac3
NM_001359990.1	0.00769333	1.92256	-7.96521	0.000280714	0.0131685	TRUE	264064	Cdk8	Cdk8
NM_001277318.1	0.015476	4.39755	-8.15052	6.97043e-05	0.011849	TRUE	66270	Retreg1	Retreg1
XM_036163601.1	0.007291	2.09101	-8.16387	0.000226918	0.0120256	TRUE	11428	Aco1	Aco1
XM_030251892.1	0.00704133	2.15953	-8.26065	0.00022392	0.0120256	TRUE	56190	Rbm38	Rbm38
XM_006535650.2	0.00883733	2.87172	-8.34409	0.000801804	0.0235141	TRUE	20535	Slc4a2	Slc4a2
TCONS_00011907	0.00341133	1.54782	-8.82569	0.000463751	0.017514	TRUE	71941	Cars2	Cars2
TCONS_00003658	0.010728	7.42474	-9.43481	0.000339445	0.0147513	TRUE	26444	Psma7	Psma7
XM_006539897.3	0.00112633	0.853869	-9.56624	0.000196093	0.011849	TRUE	233103	Garre1	Garre1
XM_036165926.1	0.00292067	2.25441	-9.59223	0.000224915	0.0120256	TRUE	18575	Pde1c	Pde1c
XM_030243769.1	0.003252	2.77016	-9.73443	0.0006671	0.0210018	TRUE	93691	Klf7	Klf7
XM_030248941.2	0.000403	0.870681	-11.0771	0.000207741	0.011849	TRUE	12053	Bcl6	Bcl6
XM_006524674.5	0.00126167	2.99592	-11.2135	0.000178928	0.011849	TRUE	56468	Socs5	Socs5
NM_144922.3	0.00172733	4.44707	-11.3301	0.000236561	0.012135	TRUE	232989	Hnrnpul1	Hnrnpul1
XM_006512550.4	0.000571	2.47697	-12.0828	0.000287366	0.0132609	TRUE	14816	Grm1	Grm1
NM_016957.3	0.000283	1.33388	-12.2025	0.00019752	0.011849	TRUE	15331	Hmgn2	Hmgn2
TCONS_00017162	0.00244233	12.213	-12.2879	0.000197005	0.011849	TRUE	11430	Acox1	Acox1
XM_006515415.2	0.00713933	37.1666	-12.3459	3.42985e-06	0.00681592	TRUE	11651	Akt1	Akt1
XM_011245449.1	0.000823	4.30942	-12.3543	0.00025308	0.0125803	TRUE	140570	Plxnb2	Plxnb2
NM_011135.5	0.000113	1.15575	-13.3202	0.000208477	0.011849	TRUE	18983	Cnot7	Cnot7
NM_052835.3	0.0136293	145.69	-13.3839	0.000112711	0.011849	TRUE	110954	Rpl10	Rpl10
NM_009207.3	0.000173333	2.47487	-13.8015	0.000419971	0.0167598	TRUE	20535	Slc4a2	Slc4a2
NM_007531.2	0.00139233	25.0157	-14.133	0.00254879	0.0436594	TRUE	12034	Phb2	Phb2
TCONS_00023491	2.33333e-06	2.30615	-19.9147	0.000208081	0.011849	TRUE	66307	Isoc1	Isoc1
NM_001360789.1	3.33333e-07	2.02566	-22.5349	0.000208104	0.011849	TRUE	232989	Hnrnpul1	Hnrnpul1

## Sheet: HyperTH vs HypoTH+T3
Transcript	HyperTH GROUP value	HypoTH+T3 GROUP value	log2foldchange	pvalue	qvalue	significance	gene_id	gene_name	gene_description
NM_026732.3	43.6589	8e-06	22.3798	5.74e-06	0.0260324	TRUE	68463	Mrpl14	Mrpl14		Upregulated
NM_021554.2	22.1048	5.3423	2.04883	1.28e-05	0.0377005	TRUE	59052	Mettl9	Mettl9		Downregulated
XR_003948720.1	0.045981	3.80075	-6.3691	4.71e-06	0.0260324	TRUE	338359	Supv3l1	Supv3l1
