# Supplementary material for: Novel Transcriptomic Interactomes of Noncoding RNAs in the Heart under Altered Thyroid Hormonal States
Source: Int J Mol Sci. 2023 Mar 31;24(7):6560. doi: 10.3390/ijms24076560 (PMC10095585; doi:10.3390/ijms24076560)
Supplement: Supplementary file 1 [file ijms-24-06560-s001.zip › Supplemental File S12 mRNA_KEGG_Enrichment_AllGroups_Significant.xlsx]

## Sheet: Control vs HypoTH Group
Category	ID	Description	GeneRatio	BgRatio	pvalue	padj	Count	geneID
KEGG	mmu03010	Ribosome	28|261	148|7916	3.90011e-21	9.59428e-19	28	20090|100042363|100503670|76846|666586|16785|19982|319195|76808|67891|100040331|68193|22186|19921|66407|666642|54127|19943|94062|100042008|68436|67671|100043423|102633237|65019|66481|225215|674419
KEGG	mmu01100	Metabolic pathways	62|261	1298|7916	1.128e-15	1.38744e-13	62	104158|110323|107476|74185|20603|12859|108682|16430|15108|20019|55979|11564|17721|11566|17709|12409|192185|18746|18972|16993|12036|11409|11428|15587|17448|67512|12856|320404|104130|18655|12861|56219|67834|239017|17772|75406|66916|54613|100043121|67942|100040340|80914|15212|11992|269951|15929|100040342|68202|20322|102247|212862|20022|14466|22273|56386|57423|11639|67054|11430|15931|67130|18784
KEGG	mmu00190	Oxidative phosphorylation	18|261	139|7916	1.41081e-11	1.15686e-09	18	100040342|74776|100040340|67942|12861|66916|75406|100043121|12859|22273|57423|104130|110323|68202|12856|17721|67130|17709
KEGG	mmu05012	Parkinson's disease	18|261	149|7916	4.00303e-11	2.46186e-09	18	100040342|68202|67942|14678|66916|75406|12861|100043121|12859|22273|100040340|224129|104130|110323|22187|17721|67130|17709
KEGG	mmu04261	Adrenergic signaling in cardiomyocytes	17|261	152|7916	4.1385e-10	1.82486e-08	17	21956|23797|16509|14678|12293|102633419|140781|59069|29857|17888|11607|224129|381290|399548|18821|17896|26932
KEGG	mmu05016	Huntington's disease	19|261	199|7916	4.58047e-10	1.82486e-08	19	100040342|68202|67942|12861|67300|20022|12914|100043121|12859|22273|100040340|104130|110323|66916|20656|75406|16438|67130|17709
KEGG	mmu05010	Alzheimer's disease	18|261	177|7916	5.1927e-10	1.82486e-08	18	100040342|68202|110323|12861|66916|67942|75406|56637|100043121|12859|22273|100040340|19056|15108|16438|104130|67130|17709
KEGG	mmu04260	Cardiac muscle contraction	13|261	80|7916	8.16087e-10	2.50947e-08	13	21956|12861|100040340|140781|12293|102633419|59069|12859|22273|110323|17896|17888|17709
KEGG	mmu05414	Dilated cardiomyopathy	12|261	90|7916	2.6842e-08	7.33681e-07	12	21956|17868|140781|12293|102633419|59069|22138|24052|13405|224129|17888|18821
KEGG	mmu04932	Non-alcoholic fatty liver disease (NAFLD)	15|261	157|7916	3.08609e-08	7.59179e-07	15	16337|23797|100040340|12861|66916|75406|56637|12859|22273|104130|110323|20787|68202|67130|17709
KEGG	mmu04510	Focal adhesion	16|261	203|7916	1.28225e-07	2.86757e-06	16	238564|23797|12444|12389|16780|70549|12387|107589|18607|56637|17898|12830|22340|81877|67268|19699
KEGG	mmu05410	Hypertrophic cardiomyopathy (HCM)	10|261	84|7916	1.00281e-06	2.05576e-05	10	21956|17868|140781|12293|102633419|59069|22138|24052|13405|17888
KEGG	mmu01210	2-Oxocarboxylic acid metabolism	6|261	20|7916	1.48815e-06	2.81604e-05	6	67834|15929|11428|12036|108682|269951
KEGG	mmu04530	Tight junction	12|261	141|7916	2.27208e-06	3.99238e-05	12	23797|14678|12385|16653|12387|140781|102633419|67268|17888|17898|56449|20130
KEGG	mmu04022	cGMP-PKG signaling pathway	13|261	173|7916	3.1435e-06	5.15534e-05	13	238564|23797|107589|14678|381290|140781|102633419|19056|11607|224129|16438|16337|18821
KEGG	mmu00020	Citrate cycle (TCA cycle)	6|261	32|7916	1.54316e-05	0.000236357	6	67834|239017|15929|17448|11428|269951
KEGG	mmu01200	Carbon metabolism	10|261	118|7916	1.63336e-05	0.000236357	10	18655|67834|239017|15929|18746|17448|11428|11409|108682|269951
KEGG	mmu05412	Arrhythmogenic right ventricular cardiomyopathy (ARVC)	8|261	74|7916	2.31594e-05	0.000316511	8	67451|12387|12385|24052|12293|13405|109620|12558
KEGG	mmu01230	Biosynthesis of amino acids	8|261	79|7916	3.56785e-05	0.000461943	8	18655|67834|15929|11428|12036|108682|18746|269951
KEGG	mmu04919	Thyroid hormone signaling pathway	9|261	117|7916	8.67134e-05	0.000989605	9	23797|16653|21833|12914|18607|56637|17888|12387|18821
KEGG	mmu04151	PI3K-Akt signaling pathway	16|261	350|7916	8.80037e-05	0.000989605	16	23797|12444|243764|16780|16337|21687|16653|18607|56637|14707|16451|12830|22340|81877|19699|26932
KEGG	mmu04072	Phospholipase D signaling pathway	10|261	146|7916	8.85013e-05	0.000989605	10	23797|67512|16337|16653|11607|224129|19158|19157|20130|55979
KEGG	mmu00230	Purine metabolism	11|261	179|7916	9.95909e-05	0.00106519	11	18575|238871|18972|20022|18746|224129|11639|67054|20019|11564|11566
KEGG	mmu04611	Platelet activation	9|261	123|7916	0.000123923	0.00127021	9	238564|23797|70549|14678|107589|29857|67268|224129|16438
KEGG	mmu04924	Renin secretion	7|261	72|7916	0.000138884	0.00136662	7	14678|19056|18575|11607|224129|16438|13030
KEGG	mmu05166	HTLV-I infection	14|261	295|7916	0.000165478	0.00156189	14	23797|12444|16653|12387|12914|70549|56637|19056|224129|56310|16451|20130|18972|59008
KEGG	mmu04152	AMPK signaling pathway	9|261	129|7916	0.000173634	0.00156189	9	23797|107476|20250|16337|13629|18607|227154|20787|26932
KEGG	mmu05213	Endometrial cancer	6|261	52|7916	0.000177776	0.00156189	6	23797|12385|12387|16653|18607|56637
KEGG	mmu04024	cAMP signaling pathway	11|261	198|7916	0.000229366	0.00189613	11	23797|14678|381290|12914|15166|224129|238871|243764|11430|20130|18821
KEGG	mmu04728	Dopaminergic synapse	9|261	135|7916	0.000238943	0.00189613	9	23797|14678|29857|56637|14707|224129|19056|16438|26932
KEGG	mmu04068	FoxO signaling pathway	9|261	135|7916	0.000238943	0.00189613	9	23797|12444|16337|12914|29857|18607|252870|16653|20656
KEGG	mmu04910	Insulin signaling pathway	9|261	142|7916	0.000339667	0.00261119	9	23797|107476|104215|16337|16653|18607|56637|14251|20787
KEGG	mmu05200	Pathways in cancer	16|261	398|7916	0.000352888	0.00263062	16	23797|16780|20315|14678|12385|12914|12387|59069|56637|14707|11607|12830|224129|22340|16451|16653
KEGG	mmu04015	Rap1 signaling pathway	11|261	215|7916	0.000446027	0.00322714	11	23797|70549|14678|16653|12387|16337|29857|21687|22340|224129|20130
KEGG	mmu04020	Calcium signaling pathway	10|261	182|7916	0.000474136	0.0033325	10	238564|107589|381290|19056|18575|11607|243764|16438|320404|18821
KEGG	mmu04213	Longevity regulating pathway - multiple species	6|261	64|7916	0.00049863	0.00340731	6	23797|12955|16337|16653|224129|20656
KEGG	mmu04142	Lysosome	8|261	124|7916	0.000643736	0.00427997	8	15931|106039|15212|67300|14466|13038|13030|13033
KEGG	mmu04921	Oxytocin signaling pathway	9|261	158|7916	0.000705143	0.0044669	9	238564|107589|14678|12293|16653|13629|19056|224129|16438
KEGG	mmu05416	Viral myocarditis	7|261	96|7916	0.000708167	0.0044669	7	12389|140781|102633419|17888|24052|13405|13690
KEGG	mmu04917	Prolactin signaling pathway	6|261	74|7916	0.0010139	0.00613568	6	23797|12444|16653|56468|29857|56637
KEGG	mmu04141	Protein processing in endoplasmic reticulum	9|261	167|7916	0.00102261	0.00613568	9	12955|27103|12017|66530|16430|69162|223455|50527|66890
KEGG	mmu05164	Influenza A	9|261	172|7916	0.00124372	0.00728466	9	23797|117198|27103|232989|12914|56637|29857|16451|15980
KEGG	mmu04210	Apoptosis	8|261	139|7916	0.00129456	0.00731016	8	23797|16653|18607|13038|22146|16438|13030|13033
KEGG	mmu05100	Bacterial invasion of epithelial cells	6|261	78|7916	0.00130751	0.00731016	6	12389|12385|67300|12387|56378|140580
KEGG	mmu04550	Signaling pathways regulating pluripotency of stem cells	8|261	140|7916	0.00135179	0.00738981	8	23797|16880|16653|12387|29857|56637|16451|11479
KEGG	mmu04066	HIF-1 signaling pathway	7|261	110|7916	0.00149517	0.00799591	7	18655|23797|16337|12914|21687|228026|15980
KEGG	mmu05152	Tuberculosis	9|261	179|7916	0.00161648	0.00846074	9	23797|19344|19345|12914|19056|29857|16451|15980|13033
KEGG	mmu04725	Cholinergic synapse	7|261	113|7916	0.00172931	0.00866412	7	23797|14678|16653|14707|224129|243764|16438
KEGG	mmu05145	Toxoplasmosis	7|261	113|7916	0.00172931	0.00866412	7	23797|16780|14678|29857|18607|16451|15980
KEGG	mmu04146	Peroxisome	6|261	83|7916	0.001761	0.00866412	6	12908|110959|18632|20656|11430|269951
KEGG	mmu04114	Oocyte meiosis	7|261	116|7916	0.00199098	0.00960353	7	69010|26932|29857|19056|224129|16438|59008
KEGG	mmu05215	Prostate cancer	6|261	89|7916	0.00245215	0.011576	6	23797|12914|12387|16653|18607|56637
KEGG	mmu04670	Leukocyte transendothelial migration	7|261	121|7916	0.00249401	0.011576	7	20315|14678|12385|12387|29857|67268|17898
KEGG	mmu04914	Progesterone-mediated oocyte maturation	6|261	90|7916	0.0025847	0.0116972	6	23797|69010|14678|29857|224129|59008
KEGG	mmu04014	Ras signaling pathway	10|261	231|7916	0.00261522	0.0116972	10	23797|16337|19344|19345|16653|21687|22340|14707|20130|18784
KEGG	mmu05169	Epstein-Barr virus infection	10|261	232|7916	0.00269407	0.0118347	10	59029|23797|20022|27103|29857|19181|12914|56637|252870|16451
KEGG	mmu04071	Sphingolipid signaling pathway	7|261	125|7916	0.00296251	0.0126841	7	23797|14678|16653|29857|18607|13033|26932
KEGG	mmu05032	Morphine addiction	6|261	93|7916	0.00301469	0.0126841	6	14773|14678|14707|18575|224129|238871
KEGG	mmu04062	Chemokine signaling pathway	9|261	198|7916	0.00309323	0.0126841	9	23797|14773|20315|14678|16653|56637|14707|224129|140580
KEGG	mmu04630	Jak-STAT signaling pathway	8|261	161|7916	0.00309367	0.0126841	8	23797|16880|12914|56468|12444|16451|15980|16157
KEGG	mmu00564	Glycerophospholipid metabolism	6|261	94|7916	0.00316923	0.0127808	6	102247|212862|74182|67512|55979|18784
KEGG	mmu04916	Melanogenesis	6|261	99|7916	0.00403211	0.0159984	6	14678|12914|12387|16653|56637|224129
KEGG	mmu04922	Glucagon signaling pathway	6|261	102|7916	0.00462676	0.0175044	6	23797|107476|12914|19056|18746|16438
KEGG	mmu00531	Glycosaminoglycan degradation	3|261	21|7916	0.00468525	0.0175044	3	15931|15212|15587
KEGG	mmu04144	Endocytosis	11|261	294|7916	0.00475329	0.0175044	11	12389|14773|19344|67300|69780|58194|56378|19158|19345|19157|228998
KEGG	mmu05160	Hepatitis C	7|261	137|7916	0.00477743	0.0175044	7	23797|27103|16653|29857|18607|56637|16451
KEGG	mmu04723	Retrograde endocannabinoid signaling	6|261	103|7916	0.00483861	0.0175044	6	14678|29857|14707|72961|224129|16438
KEGG	mmu04933	AGE-RAGE signaling pathway in diabetic complications	6|261	103|7916	0.00483861	0.0175044	6	23797|29857|16653|22340|11607|12830
KEGG	mmu04360	Axon guidance	8|261	176|7916	0.00515551	0.0183065	8	20315|14678|16653|19056|228026|13643|56637|20130
KEGG	mmu04971	Gastric acid secretion	5|261	73|7916	0.00522852	0.0183065	5	238564|107589|16438|224129|14678
KEGG	mmu04660	T cell receptor signaling pathway	6|261	105|7916	0.00528357	0.0183065	6	23797|16653|29857|18607|19056|56637
KEGG	mmu04970	Salivary secretion	5|261	78|7916	0.00678747	0.0231905	5	22318|16438|224129|13010|381290
KEGG	mmu04724	Glutamatergic synapse	6|261	115|7916	0.00796851	0.0268528	6	14678|19056|14707|72961|224129|16438
KEGG	mmu01521	EGFR tyrosine kinase inhibitor resistance	5|261	82|7916	0.00824871	0.0274214	5	16451|23797|16653|56637|14456
KEGG	mmu01212	Fatty acid metabolism	4|261	52|7916	0.00840187	0.0275581	4	11430|20250|11409|107476
KEGG	mmu04150	mTOR signaling pathway	7|261	156|7916	0.00921136	0.0298157	7	23797|16337|16653|18607|56637|227154|72124
KEGG	mmu04540	Gap junction	5|261	86|7916	0.00991467	0.0316754	5	16653|22146|16438|224129|14678
KEGG	mmu05216	Thyroid cancer	3|261	29|7916	0.0105551	0.0332261	3	16653|12387|59069
KEGG	mmu00280	Valine, leucine and isoleucine degradation	4|261	56|7916	0.0106702	0.0332261	4	11992|15108|11409|12036
KEGG	mmu04912	GnRH signaling pathway	5|261	88|7916	0.0108284	0.0332974	5	29857|16438|224129|17387|16653
KEGG	mmu04923	Regulation of lipolysis in adipocytes	4|261	57|7916	0.011293	0.0342973	4	23797|16337|224129|14678
KEGG	mmu05034	Alcoholism	8|261	204|7916	0.0116229	0.0348686	8	15270|14678|16653|14707|224129|319148|319155|319152
KEGG	mmu04270	Vascular smooth muscle contraction	6|261	128|7916	0.0127699	0.0377507	6	238564|107589|11607|224129|16438|18784
KEGG	mmu05205	Proteoglycans in cancer	8|261	208|7916	0.0128905	0.0377507	8	23797|16438|12389|16653|12387|29857|18607|20130
KEGG	mmu04370	VEGF signaling pathway	4|261	60|7916	0.0133002	0.0384924	4	23797|16653|29857|19056
KEGG	mmu04010	MAPK signaling pathway	9|261	254|7916	0.0139063	0.0397785	9	23797|12293|29857|30957|19043|19056|16653|225028|20130
KEGG	mmu01522	Endocrine resistance	5|261	95|7916	0.0144761	0.0409324	5	29857|23797|224129|54485|16653
KEGG	mmu04211	Longevity regulating pathway	5|261	96|7916	0.0150566	0.0416384	5	20656|23797|224129|16653|16337
KEGG	mmu04380	Osteoclast differentiation	6|261	133|7916	0.0150643	0.0416384	6	23797|29857|19056|13038|16451|15980
KEGG	mmu04915	Estrogen signaling pathway	5|261	98|7916	0.016264	0.0444549	5	23797|16438|224129|16653|14678
KEGG	mmu04810	Regulation of actin cytoskeleton	8|261	218|7916	0.0164989	0.0446015	8	238564|107589|16653|67268|56378|17898|243764|20130
KEGG	mmu04720	Long-term potentiation	4|261	66|7916	0.017962	0.0471102	4	16653|16438|12914|19056
KEGG	mmu05230	Central carbon metabolism in cancer	4|261	66|7916	0.017962	0.0471102	4	23797|228026|16653|18746
KEGG	mmu05162	Measles	6|261	139|7916	0.018177	0.0471102	6	23797|12444|27103|56637|16451|15980
KEGG	mmu05231	Choline metabolism in cancer	5|261	101|7916	0.018193	0.0471102	5	23797|212862|16653|74182|18607

## Sheet: HyperTH vs HypoTH Group
Category	ID	Description	GeneRatio	BgRatio	pvalue	padj	Count	geneID
KEGG	mmu01100	Metabolic pathways	78|346	1298|7916	6.56422e-17	1.62793e-14	78	70266|76563|20916|18720|67273|52064|15926|96979|56219|100705|108682|56386|18293|20019|14718|23959|11564|17721|17708|67003|66916|12409|216739|52123|104158|74340|14645|12036|103988|11429|11428|235339|270076|225010|110911|66445|67512|11992|68194|71780|18655|20603|67834|239017|170718|75406|17448|12039|238505|67870|66588|80914|16430|11689|13806|78920|269951|72947|109264|17993|102247|12858|27402|108156…
KEGG	mmu00020	Citrate cycle (TCA cycle)	14|346	32|7916	1.47595e-13	1.83018e-11	14	11429|20916|239017|18293|17448|15926|78920|68263|11428|67834|170718|56451|235339|269951
KEGG	mmu01200	Carbon metabolism	21|346	118|7916	4.82231e-13	3.98644e-11	21	18655|11429|109264|67834|235339|73724|11428|17448|15926|68263|108682|18293|20916|170718|103988|14718|239017|13806|56451|78920|269951
KEGG	mmu04261	Adrenergic signaling in cardiomyocytes	21|346	152|7916	3.54735e-11	2.19936e-09	21	21956|11512|16535|115487369|20191|16509|140781|12293|17896|14678|102633419|226849|20266|269643|224129|20541|67972|399548|11651|12288|115488289
KEGG	mmu04260	Cardiac muscle contraction	15|346	80|7916	5.464e-10	2.71014e-08	15	21956|67003|115487369|20191|12865|140781|12293|17896|102633419|12858|66445|20541|12288|115488289|17708
KEGG	mmu04510	Focal adhesion	22|346	203|7916	8.28167e-10	3.27261e-08	22	21828|22371|22370|56637|12830|12540|109700|109905|12334|170736|238564|16779|70549|67268|14083|12843|16420|12845|11798|17898|11472|11651
KEGG	mmu03010	Ribosome	19|346	148|7916	9.23721e-10	3.27261e-08	19	667618|68463|94062|68565|102633237|110954|100043391|67427|66242|67891|664947|100503670|76846|56284|100504405|20102|67681|319195|68611
KEGG	mmu04530	Tight junction	18|346	141|7916	2.76191e-09	7.91546e-08	18	20130|211446|140781|12385|102633419|14678|16653|68188|67268|216033|17898|11472|12540|27428|13821|11651|269643|115488289
KEGG	mmu01210	2-Oxocarboxylic acid metabolism	9|346	20|7916	2.87255e-09	7.91546e-08	9	67834|11428|15926|12036|11429|108682|170718|14718|269951
KEGG	mmu01230	Biosynthesis of amino acids	13|346	79|7916	3.06788e-08	7.60834e-07	13	18655|67834|11428|15926|14645|12036|11429|108682|238505|170718|14718|13806|269951
KEGG	mmu05414	Dilated cardiomyopathy	13|346	90|7916	1.20735e-07	2.72204e-06	13	21956|17868|20191|140781|12293|16420|102633419|11512|224129|20541|109700|12288|115488289
KEGG	mmu04360	Axon guidance	17|346	176|7916	3.08078e-07	6.36695e-06	17	13845|69632|20315|14678|319757|12540|16653|56637|14083|20348|228026|12632|13641|20347|171171|20130|140570
KEGG	mmu05410	Hypertrophic cardiomyopathy (HCM)	12|346	84|7916	4.0984e-07	7.81849e-06	12	21956|17868|20191|140781|12293|16420|102633419|108099|20541|109700|12288|115488289
KEGG	mmu05412	Arrhythmogenic right ventricular cardiomyopathy (ARVC)	11|346	74|7916	8.73224e-07	1.54685e-05	11	108168966|20191|12385|12288|12293|11472|109620|20541|109700|16420|216033
KEGG	mmu05012	Parkinson's disease	15|346	149|7916	9.39131e-07	1.5527e-05	15	105675|67003|17993|12865|67273|75406|66916|14678|17721|12858|224129|66445|22335|68194|17708
KEGG	mmu04022	cGMP-PKG signaling pathway	16|346	173|7916	1.15829e-06	1.79535e-05	16	238564|105675|13617|140781|19735|14678|102633419|11512|54611|115487369|224129|20541|67972|22335|11651|12288
KEGG	mmu04932	Non-alcoholic fatty liver disease (NAFLD)	15|346	157|7916	1.71444e-06	2.50106e-05	15	67003|17993|12865|67273|75406|66916|12540|56637|108099|12858|66445|20787|11651|68194|17708
KEGG	mmu04611	Platelet activation	13|346	123|7916	3.02243e-06	4.16424e-05	13	238564|70549|69632|14678|22371|67268|11512|109905|224129|18441|12843|11651|14062
KEGG	mmu04610	Complement and coagulation cascades	11|346	87|7916	3.64296e-06	4.75502e-05	11	74145|22371|22370|12260|21824|12258|12259|12509|12628|14062|12267
KEGG	mmu04062	Chemokine signaling pathway	16|346	198|7916	5.82092e-06	6.87422e-05	16	56744|16452|20315|14678|57266|16653|109905|56637|11512|66102|14083|224129|20851|12540|140580|11651
KEGG	mmu04024	cAMP signaling pathway	16|346	198|7916	5.82092e-06	6.87422e-05	16	239273|115487369|20191|14678|54611|14062|13617|20130|15166|11512|109905|224129|67972|11430|11651|12288
KEGG	mmu05200	Pathways in cancer	23|346	398|7916	1.23028e-05	0.000136917	23	14678|56637|12830|12540|69632|20315|13617|20851|16779|319757|112405|16653|17685|14083|12978|14062|11798|12385|269608|11512|224129|11651|216033
KEGG	mmu04910	Insulin signaling pathway	13|346	142|7916	1.2698e-05	0.000136917	13	102093|106628|17346|103988|16653|56637|108099|14251|104215|20787|11651|20411|100705
KEGG	mmu04151	PI3K-Akt signaling pathway	21|346	350|7916	1.72165e-05	0.000177904	21	16779|21828|16452|21687|75705|14062|22371|22370|16653|56637|12830|269643|14083|12978|12843|109700|11651|16420|226849|14600|12845
KEGG	mmu05016	Huntington's disease	15|346	199|7916	2.42228e-05	0.00024029	15	105675|67003|66916|17993|12865|67273|75406|67300|12858|66445|67665|22335|20020|68194|17708
KEGG	mmu05010	Alzheimer's disease	14|346	177|7916	2.74014e-05	0.000261367	14	67003|17993|12865|67273|75406|66916|115487481|56637|12858|66445|12334|12288|68194|17708
KEGG	mmu04924	Renin secretion	9|346	72|7916	3.01912e-05	0.000277312	9	14678|54611|12288|13617|11512|18575|11606|224129|13030
KEGG	mmu00190	Oxidative phosphorylation	12|346	139|7916	4.62327e-05	0.00040949	12	67003|17993|12865|67273|75406|66916|115490103|17721|12858|66445|68194|17708
KEGG	mmu04670	Leukocyte transendothelial migration	11|346	121|7916	6.17539e-05	0.000528103	11	21838|20315|14678|12385|109905|67268|17898|14083|11472|12540|216033
KEGG	mmu04810	Regulation of actin cytoskeleton	15|346	218|7916	6.4347e-05	0.000531935	15	238564|18720|14062|16653|14083|17898|12632|11472|67268|20430|12540|109700|20130|16420|69632
KEGG	mmu04972	Pancreatic secretion	10|346	103|7916	7.98479e-05	0.000638783	10	20535|115487369|20191|16535|19340|11512|109905|224129|67972|18784
KEGG	mmu04512	ECM-receptor interaction	9|346	83|7916	8.30688e-05	0.000643783	9	16779|21828|22371|22370|12830|12843|109700|16420|12845
KEGG	mmu00270	Cysteine and methionine metabolism	7|346	49|7916	0.000108866	0.000818145	7	20603|74340|12036|238505|67870|17448|14718
KEGG	mmu04020	Calcium signaling pathway	13|346	182|7916	0.000137344	0.00100181	13	238564|105675|20191|18575|14062|13617|14816|20541|67972|22335|102093|12288|320404
KEGG	mmu04144	Endocytosis	17|346	294|7916	0.000161081	0.00111613	17	347722|18720|15015|58194|19345|12540|17999|330319|228998|16004|19158|12978|67300|118568331|13660|14062|14276
KEGG	mmu05145	Toxoplasmosis	10|346	113|7916	0.000162018	0.00111613	10	105675|16779|16452|11689|14678|15944|11798|16145|11651|15980
KEGG	mmu05166	HTLV-I infection	17|346	295|7916	0.000167327	0.00112154	17	81601|70549|20130|15015|18970|56317|16653|56310|11512|11798|224129|20851|56637|118568331|22335|11651|59008
KEGG	mmu00564	Glycerophospholipid metabolism	9|346	94|7916	0.000198366	0.0012946	9	102247|52123|74182|74596|14245|225010|110911|67512|18784
KEGG	mmu04141	Protein processing in endoplasmic reticulum	12|346	167|7916	0.000233139	0.00146396	12	54609|27103|18415|19089|66753|26400|16430|12334|22393|56445|50527|66890
KEGG	mmu00620	Pyruvate metabolism	6|346	39|7916	0.000236123	0.00146396	6	109264|17448|68263|235339|52815|100705
KEGG	mmu04072	Phospholipase D signaling pathway	11|346	146|7916	0.000287592	0.00173958	11	20130|18720|52123|16653|11512|14816|224129|19158|67512|11651|14062
KEGG	mmu00630	Glyoxylate and dicarboxylate metabolism	5|346	30|7916	0.000569248	0.00334519	5	11429|17448|14645|73724|11428
KEGG	mmu04066	HIF-1 signaling pathway	9|346	110|7916	0.000580013	0.00334519	9	18655|21687|11651|17346|112405|68263|228026|13806|15980
KEGG	mmu04015	Rap1 signaling pathway	13|346	215|7916	0.000620513	0.00349744	13	21687|70549|20130|14678|16653|11512|109905|224129|18441|12978|12540|11651|14062
KEGG	mmu00640	Propanoate metabolism	5|346	31|7916	0.000650486	0.0035849	5	12039|20916|56451|73724|100705
KEGG	mmu04971	Gastric acid secretion	7|346	73|7916	0.000995174	0.00535406	7	238564|20535|115487369|16535|14678|11512|224129
KEGG	mmu04120	Ubiquitin mediated proteolysis	10|346	145|7916	0.00101513	0.00535406	10	67345|11798|73998|56317|17999|28000|22214|69288|75717|59008
KEGG	mmu00310	Lysine degradation	6|346	53|7916	0.00103627	0.00535406	6	239017|110147|72947|270076|18293|78920
KEGG	mmu04917	Prolactin signaling pathway	7|346	74|7916	0.00107118	0.0054215	7	11651|16653|56468|56637|20851|103988|16452
KEGG	mmu05205	Proteoglycans in cancer	12|346	208|7916	0.0014462	0.00717316	12	20130|69632|319757|22370|16653|12512|11735|14083|12540|12843|11651|75705
KEGG	mmu04933	AGE-RAGE signaling pathway in diabetic complications	8|346	103|7916	0.00157769	0.00767191	8	11651|16653|21824|12830|20851|12540|12843|16452
KEGG	mmu04921	Oxytocin signaling pathway	10|346	158|7916	0.0018565	0.00885409	10	238564|20191|14678|19735|16653|108099|12293|224129|11512|12288
KEGG	mmu04146	Peroxisome	7|346	83|7916	0.00197943	0.00926225	7	11666|216739|15926|19299|11430|23986|269951
KEGG	mmu04911	Insulin secretion	7|346	86|7916	0.0023871	0.010963	7	115487369|20191|103988|20927|11512|224129|12288
KEGG	mmu04392	Hippo signaling pathway -multiple species	4|346	26|7916	0.00267537	0.0120178	4	213391|232157|18016|56274
KEGG	mmu04725	Cholinergic synapse	8|346	113|7916	0.00271371	0.0120178	8	11651|14678|16535|16653|11512|224129|16452|12288
KEGG	mmu04919	Thyroid hormone signaling pathway	8|346	117|7916	0.0033153	0.0144245	8	115487369|17979|16653|56637|210789|20185|11651|115488289
KEGG	mmu01522	Endocrine resistance	7|346	95|7916	0.0040043	0.0171219	7	20185|17979|16653|11512|14083|224129|11651
KEGG	mmu00071	Fatty acid degradation	5|346	49|7916	0.00408778	0.0171825	5	270076|11430|12896|216739|23986
KEGG	mmu00230	Purine metabolism	10|346	179|7916	0.00432791	0.0178887	10	54611|20020|78929|11512|18575|224129|23959|66355|20019|11564
KEGG	mmu04142	Lysosome	8|346	124|7916	0.00461164	0.018749	8	12492|67300|14466|12512|74105|16004|13040|13030
KEGG	mmu04915	Estrogen signaling pathway	7|346	98|7916	0.00469487	0.0187795	7	14678|14228|16653|11512|14816|224129|11651
KEGG	mmu04520	Adherens junction	6|346	74|7916	0.00489577	0.0192722	6	19294|12385|20411|11472|12540|216033
KEGG	mmu05213	Endometrial cancer	5|346	52|7916	0.00515916	0.0199917	5	12385|11651|16653|216033|56637
KEGG	mmu04961	Endocrine and other factor-regulated calcium reabsorption	5|346	54|7916	0.00597514	0.0227975	5	67972|67300|115487369|20541|11512
KEGG	mmu05100	Bacterial invasion of epithelial cells	6|346	78|7916	0.0062037	0.0229629	6	12385|67300|14083|140580|12540|216033
KEGG	mmu04970	Salivary secretion	6|346	78|7916	0.0062037	0.0229629	6	20535|115487369|11512|224129|13010|67972
KEGG	mmu04630	Jak-STAT signaling pathway	9|346	161|7916	0.006597	0.0239663	9	16880|16452|56468|14199|20851|11651|15980|14600|16157
KEGG	mmu04010	MAPK signaling pathway	12|346	254|7916	0.00666803	0.0239663	12	17346|20130|319520|26940|16653|26400|109905|12293|56274|12540|11651|12288
KEGG	mmu04923	Regulation of lipolysis in adipocytes	5|346	57|7916	0.00736314	0.0258245	5	11512|67469|11651|224129|14678
KEGG	mmu03040	Spliceosome	8|346	135|7916	0.00739331	0.0258245	8	60321|231889|74351|545592|101214|67332|27967|28000
KEGG	mmu03018	RNA degradation	6|346	83|7916	0.00817483	0.0281578	6	104625|18983|218343|24127|13806|57259
KEGG	mmu00561	Glycerolipid metabolism	5|346	59|7916	0.00840429	0.0285516	5	102247|67512|14245|52123|225010
KEGG	mmu04210	Apoptosis	8|346	139|7916	0.00866749	0.0290478	8	11798|22035|16653|53857|12334|13040|11651|13030
KEGG	mmu05169	Epstein-Barr virus infection	11|346	232|7916	0.00894361	0.0292604	11	23996|27103|20020|56637|19185|26400|78929|17999|118568331|11651|15015
KEGG	mmu03320	PPAR signaling pathway	6|346	85|7916	0.00907679	0.0292604	6	216739|12896|20411|11430|18830|22190
KEGG	mmu00250	Alanine, aspartate and glutamate metabolism	4|346	38|7916	0.00908488	0.0292604	4	14718|108682|11564|14645
KEGG	mmu04540	Gap junction	6|346	86|7916	0.00955345	0.0303751	6	53857|14678|16653|11512|14816|224129
KEGG	mmu05164	Influenza A	9|346	172|7916	0.00975059	0.0306095	9	117198|27103|22035|232989|56637|26400|16452|15980|11651
KEGG	mmu00220	Arginine biosynthesis	3|346	20|7916	0.00991616	0.0307401	3	14718|108682|14645
KEGG	mmu04012	ErbB signaling pathway	6|346	87|7916	0.0100477	0.0307633	6	16653|56637|26400|14083|20851|11651
KEGG	mmu04912	GnRH signaling pathway	6|346	88|7916	0.0105598	0.031937	6	16653|11512|26400|224129|12540|12288
KEGG	mmu04213	Longevity regulating pathway - multiple species	5|346	64|7916	0.0114436	0.0339587	5	11512|16653|11651|224129|108099
KEGG	mmu04974	Protein digestion and absorption	6|346	90|7916	0.0116391	0.0339587	6	115487369|16535|13717|12830|20541|12843
KEGG	mmu04914	Progesterone-mediated oocyte maturation	6|346	90|7916	0.0116391	0.0339587	6	14678|56317|11512|224129|11651|59008
KEGG	mmu00970	Aminoacyl-tRNA biosynthesis	5|346	66|7916	0.0128444	0.0361979	5	71807|76563|71941|353172|70791
KEGG	mmu00010	Glycolysis / Gluconeogenesis	5|346	66|7916	0.0128444	0.0361979	5	68263|18655|13806|235339|103988
KEGG	mmu05230	Central carbon metabolism in cancer	5|346	66|7916	0.0128444	0.0361979	5	68263|103988|228026|11651|16653
KEGG	mmu04722	Neurotrophin signaling pathway	7|346	122|7916	0.0138524	0.0385999	7	16653|56637|26400|109905|12540|11651|94275
KEGG	mmu05211	Renal cell carcinoma	5|346	68|7916	0.0143567	0.0395607	5	109905|11651|16653|112405|12540
KEGG	mmu04390	Hippo signaling pathway	8|346	154|7916	0.0149367	0.0407066	8	232157|12385|56637|14219|18016|269643|216033|56274
KEGG	mmu04211	Longevity regulating pathway	6|346	96|7916	0.0153397	0.0413506	6	16653|11512|108099|224129|110147|11651
KEGG	mmu02010	ABC transporters	4|346	46|7916	0.0165429	0.0435082	4	239273|19299|20927|11666
KEGG	mmu04978	Mineral absorption	4|346	46|7916	0.0165429	0.0435082	4	67972|115487369|171429|20541
KEGG	mmu04713	Circadian entrainment	6|346	98|7916	0.0167357	0.0435082	6	20191|14678|11512|224129|18626|12288
KEGG	mmu04976	Bile secretion	5|346	71|7916	0.0168419	0.0435082	5	239273|20535|115487369|224129|11512
KEGG	mmu04270	Vascular smooth muscle contraction	7|346	128|7916	0.0173803	0.0444362	7	238564|69632|13617|11512|224129|12288|18784
KEGG	mmu00380	Tryptophan metabolism	4|346	47|7916	0.0176797	0.0447404	4	70266|239017|270076|18293
KEGG	mmu04920	Adipocytokine signaling pathway	5|346	73|7916	0.0186479	0.046714	5	100705|16452|11651|216739|108099
KEGG	mmu05133	Pertussis	5|346	74|7916	0.0195969	0.0485812	5	12260|12632|12258|12259|14678
KEGG	mmu04922	Glucagon signaling pathway	6|346	102|7916	0.0197851	0.0485812	6	102093|103988|108099|68263|11651|100705

## Sheet: HypoTH+T3 vs HypoTH Group
Category	ID	Description	GeneRatio	BgRatio	pvalue	padj	Count	geneID
KEGG	mmu01100	Metabolic pathways	38|103	1298|7916	3.15642e-15	5.52373e-13	38	58875|20916|66144|100039636|96979|16430|14718|23959|18597|56077|12039|12409|11429|235339|66445|73724|11947|66377|110095|18041|66054|67834|17448|58810|668435|11950|66091|12974|17993|108156|104158|115490103|68263|238505|103988|17308|56451|18784
KEGG	mmu01200	Carbon metabolism	13|103	118|7916	1.85491e-12	1.62304e-10	13	20916|11429|668435|67834|17448|68263|235339|73724|103988|14718|12974|56451|18597
KEGG	mmu00020	Citrate cycle (TCA cycle)	9|103	32|7916	3.04547e-12	1.77652e-10	9	20916|11429|67834|17448|68263|235339|12974|56451|18597
KEGG	mmu05012	Parkinson's disease	11|103	149|7916	4.9623e-09	2.11055e-07	11	66091|17993|12865|14678|11947|11950|22223|224129|66445|66377|22187
KEGG	mmu04261	Adrenergic signaling in cardiomyocytes	11|103	152|7916	6.03015e-09	2.11055e-07	11	16509|140781|12293|16535|20266|11607|224129|11938|14678|17896|115488289
KEGG	mmu00190	Oxidative phosphorylation	10|103	139|7916	3.15424e-08	9.19988e-07	10	66091|17993|12865|66144|100039636|115490103|11950|66445|11947|66377
KEGG	mmu04260	Cardiac muscle contraction	7|103	80|7916	1.13133e-06	2.82832e-05	7	12865|140781|12293|66445|11938|17896|115488289
KEGG	mmu00010	Glycolysis / Gluconeogenesis	6|103	66|7916	5.48589e-06	0.000120004	6	668435|103988|68263|235339|58810|18597
KEGG	mmu00620	Pyruvate metabolism	5|103	39|7916	7.34226e-06	0.000142766	5	68263|17448|235339|52815|18597
KEGG	mmu01210	2-Oxocarboxylic acid metabolism	4|103	20|7916	1.3178e-05	0.000228658	4	11429|14718|12974|67834
KEGG	mmu01230	Biosynthesis of amino acids	6|103	79|7916	1.43728e-05	0.000228658	6	668435|67834|11429|238505|14718|12974
KEGG	mmu05010	Alzheimer's disease	8|103	177|7916	2.00889e-05	0.000292963	8	66091|17993|12865|11947|11950|66445|11938|66377
KEGG	mmu05414	Dilated cardiomyopathy	6|103	90|7916	2.88078e-05	0.000387798	6	140781|12293|224129|11938|16420|115488289
KEGG	mmu04530	Tight junction	7|103	141|7916	3.7736e-05	0.0004717	7	140781|14678|17475|67268|68188|20130|115488289
KEGG	mmu04072	Phospholipase D signaling pathway	7|103	146|7916	4.66265e-05	0.000543975	7	14674|56077|14816|11607|224129|19158|20130
KEGG	mmu00630	Glyoxylate and dicarboxylate metabolism	4|103	30|7916	5.48174e-05	0.000599565	4	11429|17448|12974|73724
KEGG	mmu00640	Propanoate metabolism	4|103	31|7916	6.15944e-05	0.00063406	4	12039|20916|56451|73724
KEGG	mmu05410	Hypertrophic cardiomyopathy (HCM)	5|103	84|7916	0.000224435	0.00218201	5	12293|140781|16420|115488289|11938
KEGG	mmu05016	Huntington's disease	7|103	199|7916	0.000295171	0.00271868	7	66091|17993|12865|11947|11950|66445|66377
KEGG	mmu04932	Non-alcoholic fatty liver disease (NAFLD)	6|103	157|7916	0.000525219	0.00438228	6	66091|17993|12865|66445|20787|66377
KEGG	mmu04922	Glucagon signaling pathway	5|103	102|7916	0.000525874	0.00438228	5	68263|103988|18682|18597|110095
KEGG	mmu04022	cGMP-PKG signaling pathway	6|103	173|7916	0.000856891	0.00681618	6	14674|14678|140781|11607|224129|11938
KEGG	mmu04360	Axon guidance	6|103	176|7916	0.000933859	0.00710545	6	20315|14678|20354|20353|20130|140570
KEGG	mmu00270	Cysteine and methionine metabolism	3|103	49|7916	0.00400547	0.0292065	3	14718|17448|238505
KEGG	mmu04972	Pancreatic secretion	4|103	103|7916	0.00430829	0.030158	4	16535|11938|224129|18784
KEGG	mmu04066	HIF-1 signaling pathway	4|103	110|7916	0.00538954	0.0362758	4	68263|668435|18597|15980
KEGG	mmu00280	Valine, leucine and isoleucine degradation	3|103	56|7916	0.00571044	0.0370121	3	58875|12039|73724
KEGG	mmu04730	Long-term depression	3|103	61|7916	0.00715706	0.0437394	3	14816|14674|14678
KEGG	mmu00670	One carbon pool by folate	2|103	19|7916	0.00724824	0.0437394	2	108156|238505
KEGG	mmu04611	Platelet activation	4|103	123|7916	0.00785078	0.0457962	4	14674|224129|67268|14678
KEGG	mmu04024	cAMP signaling pathway	5|103	198|7916	0.00844565	0.0475434	5	14678|20130|224129|15166|11938
KEGG	mmu05230	Central carbon metabolism in cancer	3|103	66|7916	0.00880192	0.0475434	3	68263|103988|18597
KEGG	mmu04270	Vascular smooth muscle contraction	4|103	128|7916	0.00896533	0.0475434	4	11607|14674|224129|18784
KEGG	mmu04115	p53 signaling pathway	3|103	68|7916	0.00951664	0.0489827	3	140742|26374|13197

## Sheet: HypoTH+T3 vs Control
Category	ID	Description	GeneRatio	BgRatio	pvalue	padj	Count	geneID
KEGG	mmu04550	Signaling pathways regulating pluripotency of stem cells	1|1	140|7916	0.00364633	0.00364633	1	20482

## Sheet: HyperTH vs HypoTH+T3
Category	ID	Description	GeneRatio	BgRatio	pvalue	padj	Count	geneID
KEGG	mmu03010	Ribosome	1|1	148|7916	0.0115149	0.0115149	1	68463
