# Supplementary material for: Novel Transcriptomic Interactomes of Noncoding RNAs in the Heart under Altered Thyroid Hormonal States
Source: Int J Mol Sci. 2023 Mar 31;24(7):6560. doi: 10.3390/ijms24076560 (PMC10095585; doi:10.3390/ijms24076560)
Supplement: Supplementary file 1 [file ijms-24-06560-s001.zip › Supplemental File S13 LncRNA miRNA Interaction.xlsx]

## Sheet: HypoTH vs Control
sRNA	HypoTH readcount	Control readcount	log2FoldChange	pval	padj	Transcript	gene_id	gene_name	feature	HypoTH.value	Control .value	log2foldchange	pvalue	qvalue
mmu-miR-5126	30.4974	5.65546	2.0107	5.18e-05	0.00284	TCONS_00025777	XLOC_015265	-	lncRNA	26.7627	3.52762	2.92345	0.00141511	0.0355126
mmu-miR-5126	30.4974	5.65546	2.0107	5.18e-05	0.00284	TCONS_00022949	118568312	LOC118568312	lncRNA	27.2217	0	Inf	0.000820671	0.0276354
mmu-miR-5126	30.4974	5.65546	2.0107	5.18e-05	0.00284	TCONS_00025779	XLOC_015265	-	lncRNA	12.4547	0	Inf	0.000820671	0.0276354
mmu-miR-5126	30.4974	5.65546	2.0107	5.18e-05	0.00284	TCONS_00022369	118568312	LOC118568312	lncRNA	375.367	0	Inf	0.000820671	0.0276354
mmu-miR-5126	30.4974	5.65546	2.0107	5.18e-05	0.00284	TCONS_00022951	118568312	LOC118568312	lncRNA	20.3941	0	Inf	0.000820671	0.0276354
mmu-miR-5126	30.4974	5.65546	2.0107	5.18e-05	0.00284	TCONS_00004800	118449	Synpo2	lncRNA	1.0568	0	Inf	0.000820671	0.0276354
mmu-miR-200b-3p	90.9629	28.7971	1.6296	1.15e-10	1.59e-08	TCONS_00025777	XLOC_015265	-	lncRNA	26.7627	3.52762	2.92345	0.00141511	0.0355126
mmu-miR-200b-3p	90.9629	28.7971	1.6296	1.15e-10	1.59e-08	XR_004934374.1	102635071	Gm26944	lncRNA	0.987437	0	Inf	0.00261628	0.0488316
mmu-miR-200b-3p	90.9629	28.7971	1.6296	1.15e-10	1.59e-08	NR_045640.1	100504377	Gm20199	lncRNA	1.13868	0.103314	3.46226	0.00108062	0.0314517
mmu-miR-200b-3p	90.9629	28.7971	1.6296	1.15e-10	1.59e-08	TCONS_00004800	118449	Synpo2	lncRNA	1.0568	0	Inf	0.000820671	0.0276354
mmu-miR-200b-3p	90.9629	28.7971	1.6296	1.15e-10	1.59e-08	TCONS_00023682	12558	Cdh2	lncRNA	5.50214	3.05558	0.848547	0.00218381	0.0438821
mmu-miR-874-3p	67.1603	160.155	-1.1385	0.0024216	0.042104	TCONS_00023682	12558	Cdh2	lncRNA	5.50214	3.05558	0.848547	0.00218381	0.0438821
mmu-miR-874-3p	67.1603	160.155	-1.1385	0.0024216	0.042104	TCONS_00004800	118449	Synpo2	lncRNA	1.0568	0	Inf	0.000820671	0.0276354
mmu-miR-874-3p	67.1603	160.155	-1.1385	0.0024216	0.042104	TCONS_00022951	118568312	LOC118568312	lncRNA	20.3941	0	Inf	0.000820671	0.0276354
mmu-miR-874-3p	67.1603	160.155	-1.1385	0.0024216	0.042104	NR_002864.2	353342	Peg13	lncRNA	14.1695	9.88702	0.519179	0.00219868	0.0438821
mmu-miR-874-3p	67.1603	160.155	-1.1385	0.0024216	0.042104	TCONS_00009217	72263	1700030F04Rik	lncRNA	1.30781	0	Inf	0.000820671	0.0276354
mmu-miR-874-3p	67.1603	160.155	-1.1385	0.0024216	0.042104	TCONS_00022949	118568312	LOC118568312	lncRNA	27.2217	0	Inf	0.000820671	0.0276354
mmu-miR-874-3p	67.1603	160.155	-1.1385	0.0024216	0.042104	XR_004934374.1	102635071	Gm26944	lncRNA	0.987437	0	Inf	0.00261628	0.0488316
mmu-miR-466i-5p	352.593	42.1158	2.344	5.49e-05	0.00284	TCONS_00023682	12558	Cdh2	lncRNA	5.50214	3.05558	0.848547	0.00218381	0.0438821
mmu-miR-466i-5p	352.593	42.1158	2.344	5.49e-05	0.00284	TCONS_00004800	118449	Synpo2	lncRNA	1.0568	0	Inf	0.000820671	0.0276354
mmu-miR-466i-5p	352.593	42.1158	2.344	5.49e-05	0.00284	TCONS_00022951	118568312	LOC118568312	lncRNA	20.3941	0	Inf	0.000820671	0.0276354
mmu-miR-466i-5p	352.593	42.1158	2.344	5.49e-05	0.00284	NR_045640.1	100504377	Gm20199	lncRNA	1.13868	0.103314	3.46226	0.00108062	0.0314517
mmu-miR-466i-5p	352.593	42.1158	2.344	5.49e-05	0.00284	NR_045170.1	328186	Gm10336	lncRNA	12.3891	24.2704	-0.970129	0.000414806	0.0276354
mmu-miR-466i-5p	352.593	42.1158	2.344	5.49e-05	0.00284	TCONS_00022949	118568312	LOC118568312	lncRNA	27.2217	0	Inf	0.000820671	0.0276354
mmu-miR-466i-5p	352.593	42.1158	2.344	5.49e-05	0.00284	XR_004934374.1	102635071	Gm26944	lncRNA	0.987437	0	Inf	0.00261628	0.0488316
mmu-miR-365-1-5p	42.0397	9.35359	1.749	0.00085832	0.022209	XR_004934374.1	102635071	Gm26944	lncRNA	0.987437	0	Inf	0.00261628	0.0488316
mmu-miR-365-1-5p	42.0397	9.35359	1.749	0.00085832	0.022209	NR_028422.1	100303644	C130080G10Rik	lncRNA	0.891445	34.4444	-5.27198	0.000110105	0.0276354
mmu-miR-29b-2-5p	32.6134	115.312	-1.5205	0.0011706	0.026507	XR_867569.1	105244531	Gm40124	lncRNA	5.43055	0	Inf	0.000162748	0.0276354
mmu-miR-29b-2-5p	32.6134	115.312	-1.5205	0.0011706	0.026507	TCONS_00022951	118568312	LOC118568312	lncRNA	20.3941	0	Inf	0.000820671	0.0276354
mmu-miR-29b-2-5p	32.6134	115.312	-1.5205	0.0011706	0.026507	TCONS_00023682	12558	Cdh2	lncRNA	5.50214	3.05558	0.848547	0.00218381	0.0438821
mmu-miR-29b-2-5p	32.6134	115.312	-1.5205	0.0011706	0.026507	XR_004934374.1	102635071	Gm26944	lncRNA	0.987437	0	Inf	0.00261628	0.0488316
mmu-miR-29b-2-5p	32.6134	115.312	-1.5205	0.0011706	0.026507	TCONS_00022949	118568312	LOC118568312	lncRNA	27.2217	0	Inf	0.000820671	0.0276354
mmu-miR-690	1195.04	385.602	1.4425	0.0010865	0.02646	TCONS_00023682	12558	Cdh2	lncRNA	5.50214	3.05558	0.848547	0.00218381	0.0438821
mmu-miR-690	1195.04	385.602	1.4425	0.0010865	0.02646	TCONS_00004800	118449	Synpo2	lncRNA	1.0568	0	Inf	0.000820671	0.0276354
mmu-miR-690	1195.04	385.602	1.4425	0.0010865	0.02646	NR_002864.2	353342	Peg13	lncRNA	14.1695	9.88702	0.519179	0.00219868	0.0438821
mmu-miR-690	1195.04	385.602	1.4425	0.0010865	0.02646	NR_045170.1	328186	Gm10336	lncRNA	12.3891	24.2704	-0.970129	0.000414806	0.0276354
mmu-miR-690	1195.04	385.602	1.4425	0.0010865	0.02646	XR_004934374.1	102635071	Gm26944	lncRNA	0.987437	0	Inf	0.00261628	0.0488316
mmu-miR-690	1195.04	385.602	1.4425	0.0010865	0.02646	NR_028422.1	100303644	C130080G10Rik	lncRNA	0.891445	34.4444	-5.27198	0.000110105	0.0276354
mmu-miR-214-3p	866.854	544.158	0.66229	0.00013468	0.0046466	NR_168272.1	105246846	Gm42067	lncRNA	1.1143	4.44833	-1.99712	0.00121801	0.0333441
mmu-miR-214-3p	866.854	544.158	0.66229	0.00013468	0.0046466	XR_380269.2	102636048	Gm38485	lncRNA	1.17026	0	Inf	0.000820671	0.0276354
mmu-miR-214-3p	866.854	544.158	0.66229	0.00013468	0.0046466	TCONS_00004800	118449	Synpo2	lncRNA	1.0568	0	Inf	0.000820671	0.0276354
mmu-miR-214-3p	866.854	544.158	0.66229	0.00013468	0.0046466	TCONS_00023682	12558	Cdh2	lncRNA	5.50214	3.05558	0.848547	0.00218381	0.0438821
mmu-miR-214-3p	866.854	544.158	0.66229	0.00013468	0.0046466	NR_028422.1	100303644	C130080G10Rik	lncRNA	0.891445	34.4444	-5.27198	0.000110105	0.0276354
mmu-miR-214-3p	866.854	544.158	0.66229	0.00013468	0.0046466	NR_030738.1	69221	2410006H16Rik	lncRNA	5.19583	5.60683	-0.109831	0.00176592	0.0387359
mmu-miR-467b-5p	101.062	157.027	-0.63987	0.0013446	0.026507	TCONS_00023682	12558	Cdh2	lncRNA	5.50214	3.05558	0.848547	0.00218381	0.0438821
mmu-miR-467b-5p	101.062	157.027	-0.63987	0.0013446	0.026507	TCONS_00004800	118449	Synpo2	lncRNA	1.0568	0	Inf	0.000820671	0.0276354
mmu-miR-208a-5p	1.68468	98.5205	-4.8306	5.8e-20	1.2e-17	TCONS_00004800	118449	Synpo2	lncRNA	1.0568	0	Inf	0.000820671	0.0276354
mmu-miR-208a-5p	1.68468	98.5205	-4.8306	5.8e-20	1.2e-17	TCONS_00023682	12558	Cdh2	lncRNA	5.50214	3.05558	0.848547	0.00218381	0.0438821
mmu-miR-208a-5p	1.68468	98.5205	-4.8306	5.8e-20	1.2e-17	XR_004934374.1	102635071	Gm26944	lncRNA	0.987437	0	Inf	0.00261628	0.0488316
mmu-miR-193b-3p	657.266	247.533	1.3911	4.18e-26	1.73e-23	NR_028422.1	100303644	C130080G10Rik	lncRNA	0.891445	34.4444	-5.27198	0.000110105	0.0276354
mmu-miR-193b-3p	657.266	247.533	1.3911	4.18e-26	1.73e-23	TCONS_00025777	XLOC_015265	-	lncRNA	26.7627	3.52762	2.92345	0.00141511	0.0355126
mmu-miR-193b-3p	657.266	247.533	1.3911	4.18e-26	1.73e-23	TCONS_00023682	12558	Cdh2	lncRNA	5.50214	3.05558	0.848547	0.00218381	0.0438821
mmu-miR-214-5p	271.213	165.169	0.69303	6.26e-05	0.0028804	NR_002864.2	353342	Peg13	lncRNA	14.1695	9.88702	0.519179	0.00219868	0.0438821
mmu-miR-214-5p	271.213	165.169	0.69303	6.26e-05	0.0028804	TCONS_00022951	118568312	LOC118568312	lncRNA	20.3941	0	Inf	0.000820671	0.0276354
mmu-miR-214-5p	271.213	165.169	0.69303	6.26e-05	0.0028804	TCONS_00004800	118449	Synpo2	lncRNA	1.0568	0	Inf	0.000820671	0.0276354
mmu-miR-214-5p	271.213	165.169	0.69303	6.26e-05	0.0028804	TCONS_00023682	12558	Cdh2	lncRNA	5.50214	3.05558	0.848547	0.00218381	0.0438821
mmu-miR-214-5p	271.213	165.169	0.69303	6.26e-05	0.0028804	NR_028422.1	100303644	C130080G10Rik	lncRNA	0.891445	34.4444	-5.27198	0.000110105	0.0276354
mmu-miR-214-5p	271.213	165.169	0.69303	6.26e-05	0.0028804	TCONS_00022949	118568312	LOC118568312	lncRNA	27.2217	0	Inf	0.000820671	0.0276354
mmu-miR-6538	304.502	74.5948	1.8593	7.2e-07	7.45e-05	TCONS_00022951	118568312	LOC118568312	lncRNA	20.3941	0	Inf	0.000820671	0.0276354
mmu-miR-6538	304.502	74.5948	1.8593	7.2e-07	7.45e-05	TCONS_00022949	118568312	LOC118568312	lncRNA	27.2217	0	Inf	0.000820671	0.0276354
mmu-miR-1983	29.9641	89.2893	-1.379	0.00016096	0.0051261	TCONS_00023682	12558	Cdh2	lncRNA	5.50214	3.05558	0.848547	0.00218381	0.0438821
mmu-miR-221-3p	2269.82	1235.67	0.8571	8.52e-05	0.0035266	TCONS_00023682	12558	Cdh2	lncRNA	5.50214	3.05558	0.848547	0.00218381	0.0438821
mmu-miR-221-3p	2269.82	1235.67	0.8571	8.52e-05	0.0035266	XR_004934374.1	102635071	Gm26944	lncRNA	0.987437	0	Inf	0.00261628	0.0488316
mmu-miR-221-3p	2269.82	1235.67	0.8571	8.52e-05	0.0035266	TCONS_00025777	XLOC_015265	-	lncRNA	26.7627	3.52762	2.92345	0.00141511	0.0355126
mmu-miR-221-3p	2269.82	1235.67	0.8571	8.52e-05	0.0035266	NR_045640.1	100504377	Gm20199	lncRNA	1.13868	0.103314	3.46226	0.00108062	0.0314517
mmu-miR-200a-3p	143.74	23.9782	1.9969	0.00056829	0.015685	TCONS_00004800	118449	Synpo2	lncRNA	1.0568	0	Inf	0.000820671	0.0276354
mmu-miR-200a-3p	143.74	23.9782	1.9969	0.00056829	0.015685	TCONS_00023682	12558	Cdh2	lncRNA	5.50214	3.05558	0.848547	0.00218381	0.0438821
mmu-miR-200a-3p	143.74	23.9782	1.9969	0.00056829	0.015685	NR_002864.2	353342	Peg13	lncRNA	14.1695	9.88702	0.519179	0.00219868	0.0438821
mmu-miR-200a-3p	143.74	23.9782	1.9969	0.00056829	0.015685	NR_045640.1	100504377	Gm20199	lncRNA	1.13868	0.103314	3.46226	0.00108062	0.0314517
mmu-miR-200a-3p	143.74	23.9782	1.9969	0.00056829	0.015685	XR_004934374.1	102635071	Gm26944	lncRNA	0.987437	0	Inf	0.00261628	0.0488316
mmu-miR-200a-3p	143.74	23.9782	1.9969	0.00056829	0.015685	NR_028422.1	100303644	C130080G10Rik	lncRNA	0.891445	34.4444	-5.27198	0.000110105	0.0276354
mmu-miR-3470b	336.04	56.7948	2.1526	1.98e-05	0.0013662	TCONS_00009217	72263	1700030F04Rik	lncRNA	1.30781	0	Inf	0.000820671	0.0276354
mmu-miR-3470b	336.04	56.7948	2.1526	1.98e-05	0.0013662	NR_002864.2	353342	Peg13	lncRNA	14.1695	9.88702	0.519179	0.00219868	0.0438821
mmu-miR-3470b	336.04	56.7948	2.1526	1.98e-05	0.0013662	TCONS_00023682	12558	Cdh2	lncRNA	5.50214	3.05558	0.848547	0.00218381	0.0438821
mmu-miR-146a-5p	1144.77	2572.83	-1.0815	0.0024408	0.042104	NR_028422.1	100303644	C130080G10Rik	lncRNA	0.891445	34.4444	-5.27198	0.000110105	0.0276354
mmu-miR-146a-5p	1144.77	2572.83	-1.0815	0.0024408	0.042104	XR_881276.1	105247133	Gm42288	lncRNA	1.95594	1.10072	0.829417	0.00260002	0.0486069
mmu-miR-146a-5p	1144.77	2572.83	-1.0815	0.0024408	0.042104	NR_030738.1	69221	2410006H16Rik	lncRNA	5.19583	5.60683	-0.109831	0.00176592	0.0387359
mmu-miR-146a-5p	1144.77	2572.83	-1.0815	0.0024408	0.042104	TCONS_00022369	118568312	LOC118568312	lncRNA	375.367	0	Inf	0.000820671	0.0276354
mmu-miR-146a-5p	1144.77	2572.83	-1.0815	0.0024408	0.042104	TCONS_00023682	12558	Cdh2	lncRNA	5.50214	3.05558	0.848547	0.00218381	0.0438821
mmu-miR-146a-5p	1144.77	2572.83	-1.0815	0.0024408	0.042104	TCONS_00004800	118449	Synpo2	lncRNA	1.0568	0	Inf	0.000820671	0.0276354
mmu-miR-365-2-5p	8.11913	1.17918	1.9254	0.0018939	0.035639	XR_004934374.1	102635071	Gm26944	lncRNA	0.987437	0	Inf	0.00261628	0.0488316
mmu-miR-365-2-5p	8.11913	1.17918	1.9254	0.0018939	0.035639	NR_028422.1	100303644	C130080G10Rik	lncRNA	0.891445	34.4444	-5.27198	0.000110105	0.0276354
mmu-miR-467a-5p	101.062	157.027	-0.63987	0.0013446	0.026507	NR_002864.2	353342	Peg13	lncRNA	14.1695	9.88702	0.519179	0.00219868	0.0438821
mmu-miR-467a-5p	101.062	157.027	-0.63987	0.0013446	0.026507	TCONS_00004800	118449	Synpo2	lncRNA	1.0568	0	Inf	0.000820671	0.0276354
mmu-miR-467a-5p	101.062	157.027	-0.63987	0.0013446	0.026507	TCONS_00023682	12558	Cdh2	lncRNA	5.50214	3.05558	0.848547	0.00218381	0.0438821
mmu-miR-467a-5p	101.062	157.027	-0.63987	0.0013446	0.026507	XR_867569.1	105244531	Gm40124	lncRNA	5.43055	0	Inf	0.000162748	0.0276354
mmu-miR-1195	19.6113	1.98363	2.212	0.0004848	0.014336	TCONS_00022949	118568312	LOC118568312	lncRNA	27.2217	0	Inf	0.000820671	0.0276354
mmu-miR-1195	19.6113	1.98363	2.212	0.0004848	0.014336	TCONS_00025777	XLOC_015265	-	lncRNA	26.7627	3.52762	2.92345	0.00141511	0.0355126
mmu-miR-1195	19.6113	1.98363	2.212	0.0004848	0.014336	TCONS_00022951	118568312	LOC118568312	lncRNA	20.3941	0	Inf	0.000820671	0.0276354

## Sheet: HyperTH vs HypoTH
sRNA	HyperTH_readcount	HypoTH_readcount	log2FoldChange	pval	padj	Transcript	gene_id	gene_name	feature	HyperTH.value	HypoTH.value	log2foldchange	pvalue	qvalue
mmu-miR-199a-5p	719.344	3788.92	-2.0052	9.03e-05	0.0018669	TCONS_00002484	13821	Epb41l1	lncRNA	3.42475	1.82929	0.904712	0.0004904	0.0181397
mmu-miR-199a-5p	719.344	3788.92	-2.0052	9.03e-05	0.0018669	XR_867957.2	105244634	Gm12701	lncRNA	1.073	3.43468	-1.67852	0.0013969	0.0316638
mmu-miR-199a-5p	719.344	3788.92	-2.0052	9.03e-05	0.0018669	NR_033503.1	320301	E530011L22Rik	lncRNA	0.0857537	1.51838	-4.14619	0.00156036	0.0335072
mmu-miR-199a-5p	719.344	3788.92	-2.0052	9.03e-05	0.0018669	NR_166847.1	102639588	Gm11967	lncRNA	9.90537	0.943594	3.39197	0.00211672	0.0395093
mmu-miR-199a-5p	719.344	3788.92	-2.0052	9.03e-05	0.0018669	XR_380324.2	102640859	Gm36827	lncRNA	2.30774	0.259223	3.15422	4.59e-06	0.00722416
mmu-miR-199a-5p	719.344	3788.92	-2.0052	9.03e-05	0.0018669	NR_168057.1	665054	D330025C20Rik	lncRNA	0.547646	2.62315	-2.25998	0.000854131	0.0245945
mmu-miR-125b-5p	6872.75	16341.9	-1.1593	0.0012601	0.014477	XR_004941109.1	118568566	LOC118568566	lncRNA	0.823174	2.67283	-1.6991	0.00289617	0.0471589
mmu-miR-125b-5p	6872.75	16341.9	-1.1593	0.0012601	0.014477	XR_867957.2	105244634	Gm12701	lncRNA	1.073	3.43468	-1.67852	0.0013969	0.0316638
mmu-miR-125b-5p	6872.75	16341.9	-1.1593	0.0012601	0.014477	TCONS_00002484	13821	Epb41l1	lncRNA	3.42475	1.82929	0.904712	0.0004904	0.0181397
mmu-miR-125b-5p	6872.75	16341.9	-1.1593	0.0012601	0.014477	TCONS_00013019	102633035	Gm28979	lncRNA	2.46551	0.005822	8.72616	0.0012027	0.0291759
mmu-miR-145a-5p	3164.64	8286.18	-1.2633	0.0014973	0.016828	XR_867957.2	105244634	Gm12701	lncRNA	1.073	3.43468	-1.67852	0.0013969	0.0316638
mmu-miR-145a-5p	3164.64	8286.18	-1.2633	0.0014973	0.016828	NR_033503.1	320301	E530011L22Rik	lncRNA	0.0857537	1.51838	-4.14619	0.00156036	0.0335072
mmu-miR-145a-5p	3164.64	8286.18	-1.2633	0.0014973	0.016828	XR_004941109.1	118568566	LOC118568566	lncRNA	0.823174	2.67283	-1.6991	0.00289617	0.0471589
mmu-miR-145a-5p	3164.64	8286.18	-1.2633	0.0014973	0.016828	XR_871656.2	102640859	Gm36827	lncRNA	0	5.33212	#NAME?	7.31e-05	0.011849
mmu-miR-145a-5p	3164.64	8286.18	-1.2633	0.0014973	0.016828	NR_131913.1	100996933	Lincred1	lncRNA	0.373112	2.21895	-2.57219	7.62e-07	0.00539961
mmu-miR-145a-5p	3164.64	8286.18	-1.2633	0.0014973	0.016828	XR_001779774.2	102640859	Gm36827	lncRNA	3.46376	0.637569	2.44169	0.00187891	0.0369923
mmu-miR-145a-5p	3164.64	8286.18	-1.2633	0.0014973	0.016828	TCONS_00004800	118449	Synpo2	lncRNA	0	1.0568	#NAME?	0.000208101	0.011849
mmu-miR-145a-5p	3164.64	8286.18	-1.2633	0.0014973	0.016828	XR_380324.2	102640859	Gm36827	lncRNA	2.30774	0.259223	3.15422	4.59e-06	0.00722416
novel_41	0	5.98465	-1.8996	0.0055992	0.045231	NR_002864.2	353342	Peg13	lncRNA	11.0586	14.1695	-0.35762	0.000235785	0.012135
novel_41	0	5.98465	-1.8996	0.0055992	0.045231	NR_168057.1	665054	D330025C20Rik	lncRNA	0.547646	2.62315	-2.25998	0.000854131	0.0245945
novel_41	0	5.98465	-1.8996	0.0055992	0.045231	XR_004941109.1	118568566	LOC118568566	lncRNA	0.823174	2.67283	-1.6991	0.00289617	0.0471589
novel_41	0	5.98465	-1.8996	0.0055992	0.045231	TCONS_00004800	118449	Synpo2	lncRNA	0	1.0568	#NAME?	0.000208101	0.011849
mmu-miR-133a-3p	33387.1	102338	-1.3674	0.006259	0.049029	TCONS_00011627	109151	Chd9	lncRNA	2.97951	0.92774	1.68328	5.42e-05	0.011849
mmu-miR-133a-3p	33387.1	102338	-1.3674	0.006259	0.049029	XR_867957.2	105244634	Gm12701	lncRNA	1.073	3.43468	-1.67852	0.0013969	0.0316638
mmu-miR-133a-3p	33387.1	102338	-1.3674	0.006259	0.049029	NR_045170.1	328186	Gm10336	lncRNA	53.1293	12.3891	2.10044	0.000278123	0.0131339
mmu-miR-133a-3p	33387.1	102338	-1.3674	0.006259	0.049029	NR_045269.2	100503849	Sp3os	lncRNA	0.949198	3.11666	-1.71522	0.00271694	0.0450713
mmu-let-7f-1-3p	16.3024	2.89496	2.0064	0.00039604	0.0053882	XR_867957.2	105244634	Gm12701	lncRNA	1.073	3.43468	-1.67852	0.0013969	0.0316638
mmu-let-7f-1-3p	16.3024	2.89496	2.0064	0.00039604	0.0053882	NR_168057.1	665054	D330025C20Rik	lncRNA	0.547646	2.62315	-2.25998	0.000854131	0.0245945
mmu-let-7f-1-3p	16.3024	2.89496	2.0064	0.00039604	0.0053882	XR_004941109.1	118568566	LOC118568566	lncRNA	0.823174	2.67283	-1.6991	0.00289617	0.0471589
mmu-let-7f-1-3p	16.3024	2.89496	2.0064	0.00039604	0.0053882	TCONS_00011360	234214	Sorbs2	lncRNA	9.01319	18.2657	-1.01903	0.000457682	0.0174299
mmu-let-7f-1-3p	16.3024	2.89496	2.0064	0.00039604	0.0053882	XR_880771.2	105247026	Gm42208	lncRNA	0.641111	2.68801	-2.06789	0.000464833	0.017514
mmu-let-7f-1-3p	16.3024	2.89496	2.0064	0.00039604	0.0053882	TCONS_00013019	102633035	Gm28979	lncRNA	2.46551	0.005822	8.72616	0.0012027	0.0291759
mmu-let-7f-1-3p	16.3024	2.89496	2.0064	0.00039604	0.0053882	NR_015601.1	68128	Fam120aos	lncRNA	0.71075	4.03274	-2.50435	0.000170868	0.011849
mmu-miR-410-3p	4.51549	20.1093	-1.797	0.0003202	0.004869	NR_002864.2	353342	Peg13	lncRNA	11.0586	14.1695	-0.35762	0.000235785	0.012135
mmu-miR-410-3p	4.51549	20.1093	-1.797	0.0003202	0.004869	XR_867957.2	105244634	Gm12701	lncRNA	1.073	3.43468	-1.67852	0.0013969	0.0316638
mmu-miR-1843a-5p	810.26	431.36	0.87985	0.00037879	0.0052929	TCONS_00004800	118449	Synpo2	lncRNA	0	1.0568	#NAME?	0.000208101	0.011849
mmu-miR-1843a-5p	810.26	431.36	0.87985	0.00037879	0.0052929	NR_168272.1	105246846	Gm42067	lncRNA	4.79058	1.1143	2.10406	0.00150214	0.0328408
mmu-miR-1843a-5p	810.26	431.36	0.87985	0.00037879	0.0052929	TCONS_00002484	13821	Epb41l1	lncRNA	3.42475	1.82929	0.904712	0.0004904	0.0181397
mmu-miR-1843a-5p	810.26	431.36	0.87985	0.00037879	0.0052929	XR_867957.2	105244634	Gm12701	lncRNA	1.073	3.43468	-1.67852	0.0013969	0.0316638
mmu-miR-1843a-5p	810.26	431.36	0.87985	0.00037879	0.0052929	NR_033503.1	320301	E530011L22Rik	lncRNA	0.0857537	1.51838	-4.14619	0.00156036	0.0335072
mmu-miR-1843a-5p	810.26	431.36	0.87985	0.00037879	0.0052929	XR_004941109.1	118568566	LOC118568566	lncRNA	0.823174	2.67283	-1.6991	0.00289617	0.0471589
mmu-miR-1843a-5p	810.26	431.36	0.87985	0.00037879	0.0052929	TCONS_00013019	102633035	Gm28979	lncRNA	2.46551	0.005822	8.72616	0.0012027	0.0291759
mmu-miR-1843a-5p	810.26	431.36	0.87985	0.00037879	0.0052929	NR_045170.1	328186	Gm10336	lncRNA	53.1293	12.3891	2.10044	0.000278123	0.0131339
mmu-miR-1983	105.935	21.8472	2.0109	2.91e-07	1.5e-05	XR_867957.2	105244634	Gm12701	lncRNA	1.073	3.43468	-1.67852	0.0013969	0.0316638
mmu-miR-1983	105.935	21.8472	2.0109	2.91e-07	1.5e-05	XR_004941109.1	118568566	LOC118568566	lncRNA	0.823174	2.67283	-1.6991	0.00289617	0.0471589
mmu-miR-1983	105.935	21.8472	2.0109	2.91e-07	1.5e-05	NR_131913.1	100996933	Lincred1	lncRNA	0.373112	2.21895	-2.57219	7.62e-07	0.00539961
mmu-miR-1983	105.935	21.8472	2.0109	2.91e-07	1.5e-05	TCONS_00002484	13821	Epb41l1	lncRNA	3.42475	1.82929	0.904712	0.0004904	0.0181397
mmu-miR-22-5p	1951.7	773.714	1.2531	0.00013988	0.0025207	XR_003950992.1	115488289	Gm52092	lncRNA	3.03919	0.0234093	7.02046	0.000230314	0.0120256
mmu-miR-22-5p	1951.7	773.714	1.2531	0.00013988	0.0025207	XR_004941109.1	118568566	LOC118568566	lncRNA	0.823174	2.67283	-1.6991	0.00289617	0.0471589
mmu-miR-22-5p	1951.7	773.714	1.2531	0.00013988	0.0025207	TCONS_00011627	109151	Chd9	lncRNA	2.97951	0.92774	1.68328	5.42e-05	0.011849
mmu-miR-22-5p	1951.7	773.714	1.2531	0.00013988	0.0025207	XR_867957.2	105244634	Gm12701	lncRNA	1.073	3.43468	-1.67852	0.0013969	0.0316638
mmu-miR-22-5p	1951.7	773.714	1.2531	0.00013988	0.0025207	TCONS_00004800	118449	Synpo2	lncRNA	0	1.0568	#NAME?	0.000208101	0.011849
mmu-miR-22-5p	1951.7	773.714	1.2531	0.00013988	0.0025207	NR_045170.1	328186	Gm10336	lncRNA	53.1293	12.3891	2.10044	0.000278123	0.0131339
mmu-miR-22-5p	1951.7	773.714	1.2531	0.00013988	0.0025207	TCONS_00013019	102633035	Gm28979	lncRNA	2.46551	0.005822	8.72616	0.0012027	0.0291759
mmu-miR-3473a	3.35088	15.1579	-1.7028	0.0031398	0.029502	TCONS_00004800	118449	Synpo2	lncRNA	0	1.0568	#NAME?	0.000208101	0.011849
mmu-miR-3473a	3.35088	15.1579	-1.7028	0.0031398	0.029502	NR_166471.1	402730	Foxo6os	lncRNA	7.14892	0.057763	6.95144	0.000112968	0.011849
mmu-miR-3473a	3.35088	15.1579	-1.7028	0.0031398	0.029502	NR_168057.1	665054	D330025C20Rik	lncRNA	0.547646	2.62315	-2.25998	0.000854131	0.0245945
mmu-miR-3473a	3.35088	15.1579	-1.7028	0.0031398	0.029502	XR_380324.2	102640859	Gm36827	lncRNA	2.30774	0.259223	3.15422	4.59e-06	0.00722416
mmu-miR-3473a	3.35088	15.1579	-1.7028	0.0031398	0.029502	NR_131913.1	100996933	Lincred1	lncRNA	0.373112	2.21895	-2.57219	7.62e-07	0.00539961
mmu-miR-3473a	3.35088	15.1579	-1.7028	0.0031398	0.029502	TCONS_00002484	13821	Epb41l1	lncRNA	3.42475	1.82929	0.904712	0.0004904	0.0181397
mmu-miR-3473a	3.35088	15.1579	-1.7028	0.0031398	0.029502	XR_386629.3	102638787	Gm35268	lncRNA	4.21375	0.927016	2.18444	0.00165468	0.0342949
mmu-miR-3473a	3.35088	15.1579	-1.7028	0.0031398	0.029502	NR_033503.1	320301	E530011L22Rik	lncRNA	0.0857537	1.51838	-4.14619	0.00156036	0.0335072
mmu-miR-3473a	3.35088	15.1579	-1.7028	0.0031398	0.029502	XR_867957.2	105244634	Gm12701	lncRNA	1.073	3.43468	-1.67852	0.0013969	0.0316638
mmu-miR-3473a	3.35088	15.1579	-1.7028	0.0031398	0.029502	TCONS_00011627	109151	Chd9	lncRNA	2.97951	0.92774	1.68328	5.42e-05	0.011849
mmu-miR-3473a	3.35088	15.1579	-1.7028	0.0031398	0.029502	XR_004941109.1	118568566	LOC118568566	lncRNA	0.823174	2.67283	-1.6991	0.00289617	0.0471589
mmu-miR-3473a	3.35088	15.1579	-1.7028	0.0031398	0.029502	TCONS_00011360	234214	Sorbs2	lncRNA	9.01319	18.2657	-1.01903	0.000457682	0.0174299
mmu-miR-3473a	3.35088	15.1579	-1.7028	0.0031398	0.029502	TCONS_00013019	102633035	Gm28979	lncRNA	2.46551	0.005822	8.72616	0.0012027	0.0291759
mmu-miR-30e-3p	6042.92	2630.79	1.151	2.98e-05	0.00071151	XR_867957.2	105244634	Gm12701	lncRNA	1.073	3.43468	-1.67852	0.0013969	0.0316638
mmu-miR-30e-3p	6042.92	2630.79	1.151	2.98e-05	0.00071151	XR_004941109.1	118568566	LOC118568566	lncRNA	0.823174	2.67283	-1.6991	0.00289617	0.0471589
mmu-miR-30e-3p	6042.92	2630.79	1.151	2.98e-05	0.00071151	TCONS_00011360	234214	Sorbs2	lncRNA	9.01319	18.2657	-1.01903	0.000457682	0.0174299
mmu-miR-30e-3p	6042.92	2630.79	1.151	2.98e-05	0.00071151	TCONS_00004800	118449	Synpo2	lncRNA	0	1.0568	#NAME?	0.000208101	0.011849
mmu-miR-30e-3p	6042.92	2630.79	1.151	2.98e-05	0.00071151	XR_380324.2	102640859	Gm36827	lncRNA	2.30774	0.259223	3.15422	4.59e-06	0.00722416
mmu-miR-30e-3p	6042.92	2630.79	1.151	2.98e-05	0.00071151	NR_168057.1	665054	D330025C20Rik	lncRNA	0.547646	2.62315	-2.25998	0.000854131	0.0245945
mmu-miR-30e-3p	6042.92	2630.79	1.151	2.98e-05	0.00071151	XR_871656.2	102640859	Gm36827	lncRNA	0	5.33212	#NAME?	7.31e-05	0.011849
mmu-miR-30e-3p	6042.92	2630.79	1.151	2.98e-05	0.00071151	XR_001779774.2	102640859	Gm36827	lncRNA	3.46376	0.637569	2.44169	0.00187891	0.0369923
mmu-miR-1247-5p	11.6187	0.218395	2.6987	4.7e-05	0.0010126	NR_015601.1	68128	Fam120aos	lncRNA	0.71075	4.03274	-2.50435	0.000170868	0.011849
mmu-miR-1247-5p	11.6187	0.218395	2.6987	4.7e-05	0.0010126	XR_867957.2	105244634	Gm12701	lncRNA	1.073	3.43468	-1.67852	0.0013969	0.0316638
mmu-miR-664-3p	57.0414	158.552	-1.3933	2.16e-05	0.00069675	NR_040309.1	69659	2310069G16Rik	lncRNA	3.4037	0.273044	3.6399	0.00104853	0.027401
mmu-miR-664-3p	57.0414	158.552	-1.3933	2.16e-05	0.00069675	NR_131913.1	100996933	Lincred1	lncRNA	0.373112	2.21895	-2.57219	7.62e-07	0.00539961
mmu-miR-664-3p	57.0414	158.552	-1.3933	2.16e-05	0.00069675	XR_867957.2	105244634	Gm12701	lncRNA	1.073	3.43468	-1.67852	0.0013969	0.0316638
mmu-miR-664-3p	57.0414	158.552	-1.3933	2.16e-05	0.00069675	TCONS_00011360	234214	Sorbs2	lncRNA	9.01319	18.2657	-1.01903	0.000457682	0.0174299
mmu-miR-664-3p	57.0414	158.552	-1.3933	2.16e-05	0.00069675	XR_004941109.1	118568566	LOC118568566	lncRNA	0.823174	2.67283	-1.6991	0.00289617	0.0471589
mmu-miR-664-3p	57.0414	158.552	-1.3933	2.16e-05	0.00069675	XR_003950992.1	115488289	Gm52092	lncRNA	3.03919	0.0234093	7.02046	0.000230314	0.0120256
mmu-miR-709	0.586274	7.5428	-2.2546	0.00072839	0.0091848	XR_003950992.1	115488289	Gm52092	lncRNA	3.03919	0.0234093	7.02046	0.000230314	0.0120256
mmu-miR-709	0.586274	7.5428	-2.2546	0.00072839	0.0091848	TCONS_00004800	118449	Synpo2	lncRNA	0	1.0568	#NAME?	0.000208101	0.011849
mmu-miR-709	0.586274	7.5428	-2.2546	0.00072839	0.0091848	NR_002864.2	353342	Peg13	lncRNA	11.0586	14.1695	-0.35762	0.000235785	0.012135
mmu-miR-709	0.586274	7.5428	-2.2546	0.00072839	0.0091848	TCONS_00002484	13821	Epb41l1	lncRNA	3.42475	1.82929	0.904712	0.0004904	0.0181397
mmu-miR-709	0.586274	7.5428	-2.2546	0.00072839	0.0091848	NR_040309.1	69659	2310069G16Rik	lncRNA	3.4037	0.273044	3.6399	0.00104853	0.027401
mmu-miR-709	0.586274	7.5428	-2.2546	0.00072839	0.0091848	NR_015601.1	68128	Fam120aos	lncRNA	0.71075	4.03274	-2.50435	0.000170868	0.011849
mmu-miR-709	0.586274	7.5428	-2.2546	0.00072839	0.0091848	TCONS_00011360	234214	Sorbs2	lncRNA	9.01319	18.2657	-1.01903	0.000457682	0.0174299
mmu-miR-709	0.586274	7.5428	-2.2546	0.00072839	0.0091848	XR_004941109.1	118568566	LOC118568566	lncRNA	0.823174	2.67283	-1.6991	0.00289617	0.0471589
mmu-miR-709	0.586274	7.5428	-2.2546	0.00072839	0.0091848	TCONS_00011627	109151	Chd9	lncRNA	2.97951	0.92774	1.68328	5.42e-05	0.011849
mmu-miR-709	0.586274	7.5428	-2.2546	0.00072839	0.0091848	XR_867957.2	105244634	Gm12701	lncRNA	1.073	3.43468	-1.67852	0.0013969	0.0316638
mmu-miR-709	0.586274	7.5428	-2.2546	0.00072839	0.0091848	TCONS_00013019	102633035	Gm28979	lncRNA	2.46551	0.005822	8.72616	0.0012027	0.0291759
mmu-miR-140-3p	1997.87	6131.47	-1.5226	3.27e-06	0.00012991	TCONS_00013019	102633035	Gm28979	lncRNA	2.46551	0.005822	8.72616	0.0012027	0.0291759
mmu-miR-140-3p	1997.87	6131.47	-1.5226	3.27e-06	0.00012991	NR_045170.1	328186	Gm10336	lncRNA	53.1293	12.3891	2.10044	0.000278123	0.0131339
mmu-miR-140-3p	1997.87	6131.47	-1.5226	3.27e-06	0.00012991	NR_033503.1	320301	E530011L22Rik	lncRNA	0.0857537	1.51838	-4.14619	0.00156036	0.0335072
mmu-miR-140-3p	1997.87	6131.47	-1.5226	3.27e-06	0.00012991	XR_386629.3	102638787	Gm35268	lncRNA	4.21375	0.927016	2.18444	0.00165468	0.0342949
mmu-miR-140-3p	1997.87	6131.47	-1.5226	3.27e-06	0.00012991	XR_867957.2	105244634	Gm12701	lncRNA	1.073	3.43468	-1.67852	0.0013969	0.0316638
mmu-miR-140-3p	1997.87	6131.47	-1.5226	3.27e-06	0.00012991	XR_004941109.1	118568566	LOC118568566	lncRNA	0.823174	2.67283	-1.6991	0.00289617	0.0471589
mmu-miR-140-3p	1997.87	6131.47	-1.5226	3.27e-06	0.00012991	TCONS_00011627	109151	Chd9	lncRNA	2.97951	0.92774	1.68328	5.42e-05	0.011849
mmu-miR-140-3p	1997.87	6131.47	-1.5226	3.27e-06	0.00012991	NR_131913.1	100996933	Lincred1	lncRNA	0.373112	2.21895	-2.57219	7.62e-07	0.00539961
mmu-miR-140-3p	1997.87	6131.47	-1.5226	3.27e-06	0.00012991	NR_002864.2	353342	Peg13	lncRNA	11.0586	14.1695	-0.35762	0.000235785	0.012135
mmu-miR-140-3p	1997.87	6131.47	-1.5226	3.27e-06	0.00012991	TCONS_00002484	13821	Epb41l1	lncRNA	3.42475	1.82929	0.904712	0.0004904	0.0181397
mmu-miR-140-3p	1997.87	6131.47	-1.5226	3.27e-06	0.00012991	TCONS_00004800	118449	Synpo2	lncRNA	0	1.0568	#NAME?	0.000208101	0.011849
mmu-miR-140-3p	1997.87	6131.47	-1.5226	3.27e-06	0.00012991	XR_003950992.1	115488289	Gm52092	lncRNA	3.03919	0.0234093	7.02046	0.000230314	0.0120256
mmu-miR-365-3p	65.1937	274.522	-1.7751	0.00030026	0.004704	NR_002864.2	353342	Peg13	lncRNA	11.0586	14.1695	-0.35762	0.000235785	0.012135
mmu-miR-365-3p	65.1937	274.522	-1.7751	0.00030026	0.004704	TCONS_00013019	102633035	Gm28979	lncRNA	2.46551	0.005822	8.72616	0.0012027	0.0291759
mmu-miR-365-3p	65.1937	274.522	-1.7751	0.00030026	0.004704	XR_003950992.1	115488289	Gm52092	lncRNA	3.03919	0.0234093	7.02046	0.000230314	0.0120256
mmu-miR-365-3p	65.1937	274.522	-1.7751	0.00030026	0.004704	XR_004941109.1	118568566	LOC118568566	lncRNA	0.823174	2.67283	-1.6991	0.00289617	0.0471589
mmu-miR-365-3p	65.1937	274.522	-1.7751	0.00030026	0.004704	NR_168057.1	665054	D330025C20Rik	lncRNA	0.547646	2.62315	-2.25998	0.000854131	0.0245945
mmu-miR-365-3p	65.1937	274.522	-1.7751	0.00030026	0.004704	XR_867957.2	105244634	Gm12701	lncRNA	1.073	3.43468	-1.67852	0.0013969	0.0316638
mmu-miR-365-3p	65.1937	274.522	-1.7751	0.00030026	0.004704	NR_166471.1	402730	Foxo6os	lncRNA	7.14892	0.057763	6.95144	0.000112968	0.011849
mmu-miR-340-3p	234.838	102.67	1.1217	0.0015956	0.017552	XR_867957.2	105244634	Gm12701	lncRNA	1.073	3.43468	-1.67852	0.0013969	0.0316638
mmu-miR-25-3p	3837.83	1952.53	0.95883	6.94e-08	3.99e-06	XR_003950992.1	115488289	Gm52092	lncRNA	3.03919	0.0234093	7.02046	0.000230314	0.0120256
mmu-miR-25-3p	3837.83	1952.53	0.95883	6.94e-08	3.99e-06	TCONS_00011360	234214	Sorbs2	lncRNA	9.01319	18.2657	-1.01903	0.000457682	0.0174299
mmu-miR-25-3p	3837.83	1952.53	0.95883	6.94e-08	3.99e-06	XR_867957.2	105244634	Gm12701	lncRNA	1.073	3.43468	-1.67852	0.0013969	0.0316638
mmu-miR-25-3p	3837.83	1952.53	0.95883	6.94e-08	3.99e-06	TCONS_00004800	118449	Synpo2	lncRNA	0	1.0568	#NAME?	0.000208101	0.011849
mmu-miR-466i-5p	20.221	256.053	-2.602	3.01e-05	0.00071151	TCONS_00011360	234214	Sorbs2	lncRNA	9.01319	18.2657	-1.01903	0.000457682	0.0174299
mmu-miR-466i-5p	20.221	256.053	-2.602	3.01e-05	0.00071151	XR_004941109.1	118568566	LOC118568566	lncRNA	0.823174	2.67283	-1.6991	0.00289617	0.0471589
mmu-miR-466i-5p	20.221	256.053	-2.602	3.01e-05	0.00071151	TCONS_00011627	109151	Chd9	lncRNA	2.97951	0.92774	1.68328	5.42e-05	0.011849
mmu-miR-466i-5p	20.221	256.053	-2.602	3.01e-05	0.00071151	XR_867957.2	105244634	Gm12701	lncRNA	1.073	3.43468	-1.67852	0.0013969	0.0316638
mmu-miR-466i-5p	20.221	256.053	-2.602	3.01e-05	0.00071151	NR_045170.1	328186	Gm10336	lncRNA	53.1293	12.3891	2.10044	0.000278123	0.0131339
mmu-miR-466i-5p	20.221	256.053	-2.602	3.01e-05	0.00071151	NR_045269.2	100503849	Sp3os	lncRNA	0.949198	3.11666	-1.71522	0.00271694	0.0450713
mmu-miR-466i-5p	20.221	256.053	-2.602	3.01e-05	0.00071151	XR_003950992.1	115488289	Gm52092	lncRNA	3.03919	0.0234093	7.02046	0.000230314	0.0120256
mmu-miR-466i-5p	20.221	256.053	-2.602	3.01e-05	0.00071151	NR_168057.1	665054	D330025C20Rik	lncRNA	0.547646	2.62315	-2.25998	0.000854131	0.0245945
mmu-miR-466i-5p	20.221	256.053	-2.602	3.01e-05	0.00071151	NR_166471.1	402730	Foxo6os	lncRNA	7.14892	0.057763	6.95144	0.000112968	0.011849
mmu-miR-466i-5p	20.221	256.053	-2.602	3.01e-05	0.00071151	TCONS_00004800	118449	Synpo2	lncRNA	0	1.0568	#NAME?	0.000208101	0.011849
mmu-miR-466i-5p	20.221	256.053	-2.602	3.01e-05	0.00071151	TCONS_00002484	13821	Epb41l1	lncRNA	3.42475	1.82929	0.904712	0.0004904	0.0181397
mmu-miR-466i-5p	20.221	256.053	-2.602	3.01e-05	0.00071151	NR_131913.1	100996933	Lincred1	lncRNA	0.373112	2.21895	-2.57219	7.62e-07	0.00539961
mmu-miR-187-3p	103.017	41.2798	1.2543	0.00056947	0.0073604	TCONS_00002484	13821	Epb41l1	lncRNA	3.42475	1.82929	0.904712	0.0004904	0.0181397
mmu-miR-187-3p	103.017	41.2798	1.2543	0.00056947	0.0073604	XR_867957.2	105244634	Gm12701	lncRNA	1.073	3.43468	-1.67852	0.0013969	0.0316638
mmu-miR-214-3p	224.556	636.21	-1.4297	1.59e-06	7.49e-05	TCONS_00013019	102633035	Gm28979	lncRNA	2.46551	0.005822	8.72616	0.0012027	0.0291759
mmu-miR-214-3p	224.556	636.21	-1.4297	1.59e-06	7.49e-05	NR_045269.2	100503849	Sp3os	lncRNA	0.949198	3.11666	-1.71522	0.00271694	0.0450713
mmu-miR-214-3p	224.556	636.21	-1.4297	1.59e-06	7.49e-05	NR_033503.1	320301	E530011L22Rik	lncRNA	0.0857537	1.51838	-4.14619	0.00156036	0.0335072
mmu-miR-214-3p	224.556	636.21	-1.4297	1.59e-06	7.49e-05	TCONS_00011627	109151	Chd9	lncRNA	2.97951	0.92774	1.68328	5.42e-05	0.011849
mmu-miR-214-3p	224.556	636.21	-1.4297	1.59e-06	7.49e-05	NR_040309.1	69659	2310069G16Rik	lncRNA	3.4037	0.273044	3.6399	0.00104853	0.027401
mmu-miR-214-3p	224.556	636.21	-1.4297	1.59e-06	7.49e-05	TCONS_00002484	13821	Epb41l1	lncRNA	3.42475	1.82929	0.904712	0.0004904	0.0181397
mmu-miR-214-3p	224.556	636.21	-1.4297	1.59e-06	7.49e-05	TCONS_00004800	118449	Synpo2	lncRNA	0	1.0568	#NAME?	0.000208101	0.011849
mmu-miR-214-3p	224.556	636.21	-1.4297	1.59e-06	7.49e-05	XR_380324.2	102640859	Gm36827	lncRNA	2.30774	0.259223	3.15422	4.59e-06	0.00722416
mmu-miR-214-3p	224.556	636.21	-1.4297	1.59e-06	7.49e-05	XR_867957.2	105244634	Gm12701	lncRNA	1.073	3.43468	-1.67852	0.0013969	0.0316638
mmu-miR-214-3p	224.556	636.21	-1.4297	1.59e-06	7.49e-05	XR_004941109.1	118568566	LOC118568566	lncRNA	0.823174	2.67283	-1.6991	0.00289617	0.0471589
mmu-miR-214-3p	224.556	636.21	-1.4297	1.59e-06	7.49e-05	TCONS_00011360	234214	Sorbs2	lncRNA	9.01319	18.2657	-1.01903	0.000457682	0.0174299
mmu-miR-214-3p	224.556	636.21	-1.4297	1.59e-06	7.49e-05	XR_871656.2	102640859	Gm36827	lncRNA	0	5.33212	#NAME?	7.31e-05	0.011849
mmu-miR-214-3p	224.556	636.21	-1.4297	1.59e-06	7.49e-05	XR_001779774.2	102640859	Gm36827	lncRNA	3.46376	0.637569	2.44169	0.00187891	0.0369923
mmu-miR-214-3p	224.556	636.21	-1.4297	1.59e-06	7.49e-05	NR_166471.1	402730	Foxo6os	lncRNA	7.14892	0.057763	6.95144	0.000112968	0.011849
mmu-miR-214-3p	224.556	636.21	-1.4297	1.59e-06	7.49e-05	NR_168272.1	105246846	Gm42067	lncRNA	4.79058	1.1143	2.10406	0.00150214	0.0328408
mmu-miR-214-3p	224.556	636.21	-1.4297	1.59e-06	7.49e-05	XR_003950992.1	115488289	Gm52092	lncRNA	3.03919	0.0234093	7.02046	0.000230314	0.0120256
mmu-miR-3470b	62.8001	245.205	-1.5918	0.003462	0.030859	XR_380324.2	102640859	Gm36827	lncRNA	2.30774	0.259223	3.15422	4.59e-06	0.00722416
mmu-miR-3470b	62.8001	245.205	-1.5918	0.003462	0.030859	XR_003950992.1	115488289	Gm52092	lncRNA	3.03919	0.0234093	7.02046	0.000230314	0.0120256
mmu-miR-3470b	62.8001	245.205	-1.5918	0.003462	0.030859	NR_166471.1	402730	Foxo6os	lncRNA	7.14892	0.057763	6.95144	0.000112968	0.011849
mmu-miR-3470b	62.8001	245.205	-1.5918	0.003462	0.030859	TCONS_00002484	13821	Epb41l1	lncRNA	3.42475	1.82929	0.904712	0.0004904	0.0181397
mmu-miR-3470b	62.8001	245.205	-1.5918	0.003462	0.030859	XR_001779774.2	102640859	Gm36827	lncRNA	3.46376	0.637569	2.44169	0.00187891	0.0369923
mmu-miR-3470b	62.8001	245.205	-1.5918	0.003462	0.030859	NR_002864.2	353342	Peg13	lncRNA	11.0586	14.1695	-0.35762	0.000235785	0.012135
mmu-miR-3470b	62.8001	245.205	-1.5918	0.003462	0.030859	XR_871656.2	102640859	Gm36827	lncRNA	0	5.33212	#NAME?	7.31e-05	0.011849
mmu-miR-3470b	62.8001	245.205	-1.5918	0.003462	0.030859	TCONS_00011627	109151	Chd9	lncRNA	2.97951	0.92774	1.68328	5.42e-05	0.011849
mmu-miR-3470b	62.8001	245.205	-1.5918	0.003462	0.030859	XR_004941109.1	118568566	LOC118568566	lncRNA	0.823174	2.67283	-1.6991	0.00289617	0.0471589
mmu-miR-3470b	62.8001	245.205	-1.5918	0.003462	0.030859	XR_867957.2	105244634	Gm12701	lncRNA	1.073	3.43468	-1.67852	0.0013969	0.0316638
mmu-miR-3470b	62.8001	245.205	-1.5918	0.003462	0.030859	TCONS_00013019	102633035	Gm28979	lncRNA	2.46551	0.005822	8.72616	0.0012027	0.0291759
mmu-miR-132-5p	380.305	123.355	1.5171	3.15e-05	0.00071151	XR_003950992.1	115488289	Gm52092	lncRNA	3.03919	0.0234093	7.02046	0.000230314	0.0120256
mmu-miR-132-5p	380.305	123.355	1.5171	3.15e-05	0.00071151	NR_131913.1	100996933	Lincred1	lncRNA	0.373112	2.21895	-2.57219	7.62e-07	0.00539961
mmu-miR-181a-5p	4026.37	8893.7	-1.0571	0.0039326	0.033886	XR_004941109.1	118568566	LOC118568566	lncRNA	0.823174	2.67283	-1.6991	0.00289617	0.0471589
mmu-miR-181a-5p	4026.37	8893.7	-1.0571	0.0039326	0.033886	TCONS_00004800	118449	Synpo2	lncRNA	0	1.0568	#NAME?	0.000208101	0.011849
mmu-miR-181a-5p	4026.37	8893.7	-1.0571	0.0039326	0.033886	XR_867957.2	105244634	Gm12701	lncRNA	1.073	3.43468	-1.67852	0.0013969	0.0316638
mmu-miR-15b-5p	58.847	145.635	-1.1992	0.0024177	0.023778	TCONS_00004800	118449	Synpo2	lncRNA	0	1.0568	#NAME?	0.000208101	0.011849
mmu-miR-15b-5p	58.847	145.635	-1.1992	0.0024177	0.023778	XR_003950992.1	115488289	Gm52092	lncRNA	3.03919	0.0234093	7.02046	0.000230314	0.0120256
mmu-miR-15b-5p	58.847	145.635	-1.1992	0.0024177	0.023778	NR_002864.2	353342	Peg13	lncRNA	11.0586	14.1695	-0.35762	0.000235785	0.012135
mmu-miR-15b-5p	58.847	145.635	-1.1992	0.0024177	0.023778	XR_867957.2	105244634	Gm12701	lncRNA	1.073	3.43468	-1.67852	0.0013969	0.0316638
mmu-miR-15b-5p	58.847	145.635	-1.1992	0.0024177	0.023778	TCONS_00011627	109151	Chd9	lncRNA	2.97951	0.92774	1.68328	5.42e-05	0.011849
mmu-miR-15b-5p	58.847	145.635	-1.1992	0.0024177	0.023778	TCONS_00011360	234214	Sorbs2	lncRNA	9.01319	18.2657	-1.01903	0.000457682	0.0174299
mmu-miR-15b-5p	58.847	145.635	-1.1992	0.0024177	0.023778	XR_004941109.1	118568566	LOC118568566	lncRNA	0.823174	2.67283	-1.6991	0.00289617	0.0471589
mmu-miR-15b-5p	58.847	145.635	-1.1992	0.0024177	0.023778	XR_880771.2	105247026	Gm42208	lncRNA	0.641111	2.68801	-2.06789	0.000464833	0.017514
mmu-miR-15b-5p	58.847	145.635	-1.1992	0.0024177	0.023778	NR_045269.2	100503849	Sp3os	lncRNA	0.949198	3.11666	-1.71522	0.00271694	0.0450713
mmu-miR-15b-5p	58.847	145.635	-1.1992	0.0024177	0.023778	NR_045170.1	328186	Gm10336	lncRNA	53.1293	12.3891	2.10044	0.000278123	0.0131339
mmu-miR-222-5p	4.02238	20.9013	-1.7809	0.0025433	0.02435	TCONS_00004800	118449	Synpo2	lncRNA	0	1.0568	#NAME?	0.000208101	0.011849
mmu-miR-222-5p	4.02238	20.9013	-1.7809	0.0025433	0.02435	XR_867957.2	105244634	Gm12701	lncRNA	1.073	3.43468	-1.67852	0.0013969	0.0316638
mmu-miR-222-5p	4.02238	20.9013	-1.7809	0.0025433	0.02435	XR_380324.2	102640859	Gm36827	lncRNA	2.30774	0.259223	3.15422	4.59e-06	0.00722416
mmu-miR-222-5p	4.02238	20.9013	-1.7809	0.0025433	0.02435	XR_003950992.1	115488289	Gm52092	lncRNA	3.03919	0.0234093	7.02046	0.000230314	0.0120256
mmu-miR-222-5p	4.02238	20.9013	-1.7809	0.0025433	0.02435	XR_871656.2	102640859	Gm36827	lncRNA	0	5.33212	#NAME?	7.31e-05	0.011849
mmu-miR-222-5p	4.02238	20.9013	-1.7809	0.0025433	0.02435	XR_001779774.2	102640859	Gm36827	lncRNA	3.46376	0.637569	2.44169	0.00187891	0.0369923
mmu-miR-222-5p	4.02238	20.9013	-1.7809	0.0025433	0.02435	NR_002864.2	353342	Peg13	lncRNA	11.0586	14.1695	-0.35762	0.000235785	0.012135
novel_37	0.779055	6.59332	-1.95	0.0031955	0.029502	NR_033503.1	320301	E530011L22Rik	lncRNA	0.0857537	1.51838	-4.14619	0.00156036	0.0335072
novel_37	0.779055	6.59332	-1.95	0.0031955	0.029502	XR_867957.2	105244634	Gm12701	lncRNA	1.073	3.43468	-1.67852	0.0013969	0.0316638
novel_37	0.779055	6.59332	-1.95	0.0031955	0.029502	TCONS_00011627	109151	Chd9	lncRNA	2.97951	0.92774	1.68328	5.42e-05	0.011849
novel_37	0.779055	6.59332	-1.95	0.0031955	0.029502	NR_168057.1	665054	D330025C20Rik	lncRNA	0.547646	2.62315	-2.25998	0.000854131	0.0245945
novel_37	0.779055	6.59332	-1.95	0.0031955	0.029502	NR_002864.2	353342	Peg13	lncRNA	11.0586	14.1695	-0.35762	0.000235785	0.012135
mmu-miR-210-3p	79.7574	241.133	-1.3655	0.0053269	0.04442	XR_867957.2	105244634	Gm12701	lncRNA	1.073	3.43468	-1.67852	0.0013969	0.0316638
mmu-miR-210-3p	79.7574	241.133	-1.3655	0.0053269	0.04442	NR_168057.1	665054	D330025C20Rik	lncRNA	0.547646	2.62315	-2.25998	0.000854131	0.0245945
mmu-miR-210-3p	79.7574	241.133	-1.3655	0.0053269	0.04442	NR_166847.1	102639588	Gm11967	lncRNA	9.90537	0.943594	3.39197	0.00211672	0.0395093
mmu-miR-210-3p	79.7574	241.133	-1.3655	0.0053269	0.04442	XR_004941109.1	118568566	LOC118568566	lncRNA	0.823174	2.67283	-1.6991	0.00289617	0.0471589
mmu-miR-132-3p	245.631	107.923	1.1452	0.0001029	0.0020462	TCONS_00002484	13821	Epb41l1	lncRNA	3.42475	1.82929	0.904712	0.0004904	0.0181397
mmu-miR-132-3p	245.631	107.923	1.1452	0.0001029	0.0020462	NR_131913.1	100996933	Lincred1	lncRNA	0.373112	2.21895	-2.57219	7.62e-07	0.00539961
mmu-miR-132-3p	245.631	107.923	1.1452	0.0001029	0.0020462	NR_166471.1	402730	Foxo6os	lncRNA	7.14892	0.057763	6.95144	0.000112968	0.011849
mmu-miR-132-3p	245.631	107.923	1.1452	0.0001029	0.0020462	TCONS_00004800	118449	Synpo2	lncRNA	0	1.0568	#NAME?	0.000208101	0.011849
mmu-miR-132-3p	245.631	107.923	1.1452	0.0001029	0.0020462	TCONS_00011627	109151	Chd9	lncRNA	2.97951	0.92774	1.68328	5.42e-05	0.011849
mmu-miR-132-3p	245.631	107.923	1.1452	0.0001029	0.0020462	XR_004941109.1	118568566	LOC118568566	lncRNA	0.823174	2.67283	-1.6991	0.00289617	0.0471589
mmu-miR-132-3p	245.631	107.923	1.1452	0.0001029	0.0020462	TCONS_00011360	234214	Sorbs2	lncRNA	9.01319	18.2657	-1.01903	0.000457682	0.0174299
mmu-miR-132-3p	245.631	107.923	1.1452	0.0001029	0.0020462	XR_867957.2	105244634	Gm12701	lncRNA	1.073	3.43468	-1.67852	0.0013969	0.0316638
novel_25	21.5635	3.37256	2.248	2.75e-05	0.00071151	NR_002864.2	353342	Peg13	lncRNA	11.0586	14.1695	-0.35762	0.000235785	0.012135
novel_25	21.5635	3.37256	2.248	2.75e-05	0.00071151	NR_166471.1	402730	Foxo6os	lncRNA	7.14892	0.057763	6.95144	0.000112968	0.011849
novel_25	21.5635	3.37256	2.248	2.75e-05	0.00071151	TCONS_00004800	118449	Synpo2	lncRNA	0	1.0568	#NAME?	0.000208101	0.011849
novel_25	21.5635	3.37256	2.248	2.75e-05	0.00071151	NR_168057.1	665054	D330025C20Rik	lncRNA	0.547646	2.62315	-2.25998	0.000854131	0.0245945
novel_25	21.5635	3.37256	2.248	2.75e-05	0.00071151	NR_045170.1	328186	Gm10336	lncRNA	53.1293	12.3891	2.10044	0.000278123	0.0131339
novel_25	21.5635	3.37256	2.248	2.75e-05	0.00071151	XR_867957.2	105244634	Gm12701	lncRNA	1.073	3.43468	-1.67852	0.0013969	0.0316638
novel_25	21.5635	3.37256	2.248	2.75e-05	0.00071151	TCONS_00011627	109151	Chd9	lncRNA	2.97951	0.92774	1.68328	5.42e-05	0.011849
novel_25	21.5635	3.37256	2.248	2.75e-05	0.00071151	XR_004941109.1	118568566	LOC118568566	lncRNA	0.823174	2.67283	-1.6991	0.00289617	0.0471589
mmu-miR-7068-3p	15.3231	2.63576	1.858	0.0024128	0.023778	XR_004941109.1	118568566	LOC118568566	lncRNA	0.823174	2.67283	-1.6991	0.00289617	0.0471589
mmu-miR-7068-3p	15.3231	2.63576	1.858	0.0024128	0.023778	XR_003950992.1	115488289	Gm52092	lncRNA	3.03919	0.0234093	7.02046	0.000230314	0.0120256
mmu-miR-7068-3p	15.3231	2.63576	1.858	0.0024128	0.023778	TCONS_00011627	109151	Chd9	lncRNA	2.97951	0.92774	1.68328	5.42e-05	0.011849
mmu-miR-7068-3p	15.3231	2.63576	1.858	0.0024128	0.023778	XR_867957.2	105244634	Gm12701	lncRNA	1.073	3.43468	-1.67852	0.0013969	0.0316638
mmu-miR-7068-3p	15.3231	2.63576	1.858	0.0024128	0.023778	NR_131913.1	100996933	Lincred1	lncRNA	0.373112	2.21895	-2.57219	7.62e-07	0.00539961
mmu-miR-193b-3p	78.3692	482.688	-2.4647	5.48e-14	1.42e-11	XR_004941109.1	118568566	LOC118568566	lncRNA	0.823174	2.67283	-1.6991	0.00289617	0.0471589
mmu-miR-193b-3p	78.3692	482.688	-2.4647	5.48e-14	1.42e-11	TCONS_00013019	102633035	Gm28979	lncRNA	2.46551	0.005822	8.72616	0.0012027	0.0291759
mmu-miR-193b-3p	78.3692	482.688	-2.4647	5.48e-14	1.42e-11	NR_131913.1	100996933	Lincred1	lncRNA	0.373112	2.21895	-2.57219	7.62e-07	0.00539961
mmu-miR-199b-5p	27.0097	119.828	-1.7088	0.0022931	0.023711	XR_867957.2	105244634	Gm12701	lncRNA	1.073	3.43468	-1.67852	0.0013969	0.0316638
mmu-miR-199b-5p	27.0097	119.828	-1.7088	0.0022931	0.023711	NR_033503.1	320301	E530011L22Rik	lncRNA	0.0857537	1.51838	-4.14619	0.00156036	0.0335072
mmu-miR-199b-5p	27.0097	119.828	-1.7088	0.0022931	0.023711	XR_380324.2	102640859	Gm36827	lncRNA	2.30774	0.259223	3.15422	4.59e-06	0.00722416
mmu-miR-199b-5p	27.0097	119.828	-1.7088	0.0022931	0.023711	NR_168057.1	665054	D330025C20Rik	lncRNA	0.547646	2.62315	-2.25998	0.000854131	0.0245945
mmu-miR-199b-5p	27.0097	119.828	-1.7088	0.0022931	0.023711	NR_166847.1	102639588	Gm11967	lncRNA	9.90537	0.943594	3.39197	0.00211672	0.0395093
mmu-miR-199b-5p	27.0097	119.828	-1.7088	0.0022931	0.023711	TCONS_00002484	13821	Epb41l1	lncRNA	3.42475	1.82929	0.904712	0.0004904	0.0181397
mmu-miR-29c-5p	781.991	252.391	1.5656	6.64e-08	3.99e-06	NR_168057.1	665054	D330025C20Rik	lncRNA	0.547646	2.62315	-2.25998	0.000854131	0.0245945
mmu-miR-1247-3p	5.88082	0	2.2768	0.00099164	0.012207	XR_867957.2	105244634	Gm12701	lncRNA	1.073	3.43468	-1.67852	0.0013969	0.0316638
mmu-miR-3074-1-3p	202.772	58.2164	1.6317	0.00014139	0.0025207	XR_867957.2	105244634	Gm12701	lncRNA	1.073	3.43468	-1.67852	0.0013969	0.0316638
mmu-miR-3074-1-3p	202.772	58.2164	1.6317	0.00014139	0.0025207	XR_004941109.1	118568566	LOC118568566	lncRNA	0.823174	2.67283	-1.6991	0.00289617	0.0471589
mmu-miR-3074-1-3p	202.772	58.2164	1.6317	0.00014139	0.0025207	TCONS_00013019	102633035	Gm28979	lncRNA	2.46551	0.005822	8.72616	0.0012027	0.0291759
mmu-miR-3074-1-3p	202.772	58.2164	1.6317	0.00014139	0.0025207	NR_045170.1	328186	Gm10336	lncRNA	53.1293	12.3891	2.10044	0.000278123	0.0131339
mmu-miR-150-5p	538.71	1633.32	-1.488	2.95e-05	0.00071151	TCONS_00004800	118449	Synpo2	lncRNA	0	1.0568	#NAME?	0.000208101	0.011849
mmu-miR-150-5p	538.71	1633.32	-1.488	2.95e-05	0.00071151	NR_168057.1	665054	D330025C20Rik	lncRNA	0.547646	2.62315	-2.25998	0.000854131	0.0245945
mmu-miR-150-5p	538.71	1633.32	-1.488	2.95e-05	0.00071151	XR_003950992.1	115488289	Gm52092	lncRNA	3.03919	0.0234093	7.02046	0.000230314	0.0120256
mmu-miR-150-5p	538.71	1633.32	-1.488	2.95e-05	0.00071151	XR_867957.2	105244634	Gm12701	lncRNA	1.073	3.43468	-1.67852	0.0013969	0.0316638
mmu-miR-150-5p	538.71	1633.32	-1.488	2.95e-05	0.00071151	TCONS_00011627	109151	Chd9	lncRNA	2.97951	0.92774	1.68328	5.42e-05	0.011849
mmu-miR-150-5p	538.71	1633.32	-1.488	2.95e-05	0.00071151	XR_004941109.1	118568566	LOC118568566	lncRNA	0.823174	2.67283	-1.6991	0.00289617	0.0471589
mmu-miR-150-5p	538.71	1633.32	-1.488	2.95e-05	0.00071151	TCONS_00011360	234214	Sorbs2	lncRNA	9.01319	18.2657	-1.01903	0.000457682	0.0174299
mmu-miR-150-5p	538.71	1633.32	-1.488	2.95e-05	0.00071151	XR_880771.2	105247026	Gm42208	lncRNA	0.641111	2.68801	-2.06789	0.000464833	0.017514
mmu-miR-150-5p	538.71	1633.32	-1.488	2.95e-05	0.00071151	TCONS_00013019	102633035	Gm28979	lncRNA	2.46551	0.005822	8.72616	0.0012027	0.0291759
mmu-miR-1843b-5p	544.805	238.498	1.1434	2.7e-05	0.00071151	XR_867957.2	105244634	Gm12701	lncRNA	1.073	3.43468	-1.67852	0.0013969	0.0316638
mmu-miR-1843b-5p	544.805	238.498	1.1434	2.7e-05	0.00071151	XR_004941109.1	118568566	LOC118568566	lncRNA	0.823174	2.67283	-1.6991	0.00289617	0.0471589
mmu-miR-1843b-5p	544.805	238.498	1.1434	2.7e-05	0.00071151	TCONS_00011360	234214	Sorbs2	lncRNA	9.01319	18.2657	-1.01903	0.000457682	0.0174299
mmu-miR-1843b-5p	544.805	238.498	1.1434	2.7e-05	0.00071151	TCONS_00011627	109151	Chd9	lncRNA	2.97951	0.92774	1.68328	5.42e-05	0.011849
mmu-miR-1843b-5p	544.805	238.498	1.1434	2.7e-05	0.00071151	NR_166471.1	402730	Foxo6os	lncRNA	7.14892	0.057763	6.95144	0.000112968	0.011849
mmu-miR-1843b-5p	544.805	238.498	1.1434	2.7e-05	0.00071151	TCONS_00004800	118449	Synpo2	lncRNA	0	1.0568	#NAME?	0.000208101	0.011849
mmu-miR-1843b-5p	544.805	238.498	1.1434	2.7e-05	0.00071151	NR_131913.1	100996933	Lincred1	lncRNA	0.373112	2.21895	-2.57219	7.62e-07	0.00539961
mmu-miR-1843b-5p	544.805	238.498	1.1434	2.7e-05	0.00071151	TCONS_00002484	13821	Epb41l1	lncRNA	3.42475	1.82929	0.904712	0.0004904	0.0181397
mmu-miR-208a-3p	90.9994	14.2837	2.0705	0.00015575	0.0025974	XR_003950992.1	115488289	Gm52092	lncRNA	3.03919	0.0234093	7.02046	0.000230314	0.0120256
mmu-miR-467a-5p	236.169	74.3697	1.608	1.45e-08	1.07e-06	TCONS_00013019	102633035	Gm28979	lncRNA	2.46551	0.005822	8.72616	0.0012027	0.0291759
mmu-miR-467a-5p	236.169	74.3697	1.608	1.45e-08	1.07e-06	TCONS_00002484	13821	Epb41l1	lncRNA	3.42475	1.82929	0.904712	0.0004904	0.0181397
mmu-miR-467a-5p	236.169	74.3697	1.608	1.45e-08	1.07e-06	NR_002864.2	353342	Peg13	lncRNA	11.0586	14.1695	-0.35762	0.000235785	0.012135
mmu-miR-467a-5p	236.169	74.3697	1.608	1.45e-08	1.07e-06	XR_867957.2	105244634	Gm12701	lncRNA	1.073	3.43468	-1.67852	0.0013969	0.0316638
mmu-miR-467a-5p	236.169	74.3697	1.608	1.45e-08	1.07e-06	XR_386629.3	102638787	Gm35268	lncRNA	4.21375	0.927016	2.18444	0.00165468	0.0342949
mmu-miR-467a-5p	236.169	74.3697	1.608	1.45e-08	1.07e-06	TCONS_00004800	118449	Synpo2	lncRNA	0	1.0568	#NAME?	0.000208101	0.011849
mmu-miR-511-5p	15.1715	3.25585	1.6378	0.0034419	0.030859	NR_045170.1	328186	Gm10336	lncRNA	53.1293	12.3891	2.10044	0.000278123	0.0131339
mmu-miR-511-5p	15.1715	3.25585	1.6378	0.0034419	0.030859	TCONS_00013019	102633035	Gm28979	lncRNA	2.46551	0.005822	8.72616	0.0012027	0.0291759
mmu-miR-511-5p	15.1715	3.25585	1.6378	0.0034419	0.030859	TCONS_00011627	109151	Chd9	lncRNA	2.97951	0.92774	1.68328	5.42e-05	0.011849
mmu-miR-511-5p	15.1715	3.25585	1.6378	0.0034419	0.030859	XR_004941109.1	118568566	LOC118568566	lncRNA	0.823174	2.67283	-1.6991	0.00289617	0.0471589
mmu-miR-511-5p	15.1715	3.25585	1.6378	0.0034419	0.030859	TCONS_00011360	234214	Sorbs2	lncRNA	9.01319	18.2657	-1.01903	0.000457682	0.0174299
mmu-miR-511-5p	15.1715	3.25585	1.6378	0.0034419	0.030859	XR_867957.2	105244634	Gm12701	lncRNA	1.073	3.43468	-1.67852	0.0013969	0.0316638
mmu-miR-511-5p	15.1715	3.25585	1.6378	0.0034419	0.030859	TCONS_00002484	13821	Epb41l1	lncRNA	3.42475	1.82929	0.904712	0.0004904	0.0181397
mmu-miR-511-5p	15.1715	3.25585	1.6378	0.0034419	0.030859	XR_001779774.2	102640859	Gm36827	lncRNA	3.46376	0.637569	2.44169	0.00187891	0.0369923
mmu-miR-511-5p	15.1715	3.25585	1.6378	0.0034419	0.030859	XR_871656.2	102640859	Gm36827	lncRNA	0	5.33212	#NAME?	7.31e-05	0.011849
mmu-miR-511-5p	15.1715	3.25585	1.6378	0.0034419	0.030859	XR_380324.2	102640859	Gm36827	lncRNA	2.30774	0.259223	3.15422	4.59e-06	0.00722416
mmu-miR-511-5p	15.1715	3.25585	1.6378	0.0034419	0.030859	NR_168057.1	665054	D330025C20Rik	lncRNA	0.547646	2.62315	-2.25998	0.000854131	0.0245945
mmu-miR-511-5p	15.1715	3.25585	1.6378	0.0034419	0.030859	TCONS_00004800	118449	Synpo2	lncRNA	0	1.0568	#NAME?	0.000208101	0.011849
mmu-miR-6538	71.055	224.02	-1.5255	3.17e-05	0.00071151	XR_867957.2	105244634	Gm12701	lncRNA	1.073	3.43468	-1.67852	0.0013969	0.0316638
mmu-miR-6538	71.055	224.02	-1.5255	3.17e-05	0.00071151	TCONS_00011360	234214	Sorbs2	lncRNA	9.01319	18.2657	-1.01903	0.000457682	0.0174299
mmu-miR-6538	71.055	224.02	-1.5255	3.17e-05	0.00071151	TCONS_00002484	13821	Epb41l1	lncRNA	3.42475	1.82929	0.904712	0.0004904	0.0181397
mmu-miR-28a-5p	63.2483	152.675	-1.1661	0.0024376	0.023778	TCONS_00002484	13821	Epb41l1	lncRNA	3.42475	1.82929	0.904712	0.0004904	0.0181397
mmu-miR-28a-5p	63.2483	152.675	-1.1661	0.0024376	0.023778	TCONS_00004800	118449	Synpo2	lncRNA	0	1.0568	#NAME?	0.000208101	0.011849
mmu-miR-28a-5p	63.2483	152.675	-1.1661	0.0024376	0.023778	XR_003950992.1	115488289	Gm52092	lncRNA	3.03919	0.0234093	7.02046	0.000230314	0.0120256
mmu-miR-28a-5p	63.2483	152.675	-1.1661	0.0024376	0.023778	NR_168057.1	665054	D330025C20Rik	lncRNA	0.547646	2.62315	-2.25998	0.000854131	0.0245945
mmu-miR-28a-5p	63.2483	152.675	-1.1661	0.0024376	0.023778	TCONS_00013019	102633035	Gm28979	lncRNA	2.46551	0.005822	8.72616	0.0012027	0.0291759
mmu-miR-28a-5p	63.2483	152.675	-1.1661	0.0024376	0.023778	NR_045170.1	328186	Gm10336	lncRNA	53.1293	12.3891	2.10044	0.000278123	0.0131339
mmu-miR-28a-5p	63.2483	152.675	-1.1661	0.0024376	0.023778	XR_867957.2	105244634	Gm12701	lncRNA	1.073	3.43468	-1.67852	0.0013969	0.0316638
mmu-miR-28a-5p	63.2483	152.675	-1.1661	0.0024376	0.023778	TCONS_00011360	234214	Sorbs2	lncRNA	9.01319	18.2657	-1.01903	0.000457682	0.0174299
mmu-miR-28a-5p	63.2483	152.675	-1.1661	0.0024376	0.023778	XR_004941109.1	118568566	LOC118568566	lncRNA	0.823174	2.67283	-1.6991	0.00289617	0.0471589
mmu-miR-28a-5p	63.2483	152.675	-1.1661	0.0024376	0.023778	TCONS_00011627	109151	Chd9	lncRNA	2.97951	0.92774	1.68328	5.42e-05	0.011849
mmu-miR-339-5p	78.4361	308.32	-1.6626	0.0010544	0.012678	NR_168057.1	665054	D330025C20Rik	lncRNA	0.547646	2.62315	-2.25998	0.000854131	0.0245945
mmu-miR-339-5p	78.4361	308.32	-1.6626	0.0010544	0.012678	NR_166471.1	402730	Foxo6os	lncRNA	7.14892	0.057763	6.95144	0.000112968	0.011849
mmu-miR-339-5p	78.4361	308.32	-1.6626	0.0010544	0.012678	TCONS_00004800	118449	Synpo2	lncRNA	0	1.0568	#NAME?	0.000208101	0.011849
mmu-miR-339-5p	78.4361	308.32	-1.6626	0.0010544	0.012678	NR_131913.1	100996933	Lincred1	lncRNA	0.373112	2.21895	-2.57219	7.62e-07	0.00539961
mmu-miR-339-5p	78.4361	308.32	-1.6626	0.0010544	0.012678	TCONS_00011627	109151	Chd9	lncRNA	2.97951	0.92774	1.68328	5.42e-05	0.011849
mmu-miR-339-5p	78.4361	308.32	-1.6626	0.0010544	0.012678	XR_004941109.1	118568566	LOC118568566	lncRNA	0.823174	2.67283	-1.6991	0.00289617	0.0471589
mmu-miR-339-5p	78.4361	308.32	-1.6626	0.0010544	0.012678	NR_033503.1	320301	E530011L22Rik	lncRNA	0.0857537	1.51838	-4.14619	0.00156036	0.0335072
mmu-miR-339-5p	78.4361	308.32	-1.6626	0.0010544	0.012678	XR_867957.2	105244634	Gm12701	lncRNA	1.073	3.43468	-1.67852	0.0013969	0.0316638
mmu-miR-339-5p	78.4361	308.32	-1.6626	0.0010544	0.012678	NR_045170.1	328186	Gm10336	lncRNA	53.1293	12.3891	2.10044	0.000278123	0.0131339
mmu-miR-339-5p	78.4361	308.32	-1.6626	0.0010544	0.012678	TCONS_00013019	102633035	Gm28979	lncRNA	2.46551	0.005822	8.72616	0.0012027	0.0291759
mmu-miR-378d	11.108	1.76218	1.9113	0.0035242	0.030881	XR_003950992.1	115488289	Gm52092	lncRNA	3.03919	0.0234093	7.02046	0.000230314	0.0120256
mmu-miR-378d	11.108	1.76218	1.9113	0.0035242	0.030881	NR_166471.1	402730	Foxo6os	lncRNA	7.14892	0.057763	6.95144	0.000112968	0.011849
mmu-miR-378d	11.108	1.76218	1.9113	0.0035242	0.030881	TCONS_00004800	118449	Synpo2	lncRNA	0	1.0568	#NAME?	0.000208101	0.011849
mmu-miR-378d	11.108	1.76218	1.9113	0.0035242	0.030881	NR_131913.1	100996933	Lincred1	lncRNA	0.373112	2.21895	-2.57219	7.62e-07	0.00539961
mmu-miR-378d	11.108	1.76218	1.9113	0.0035242	0.030881	TCONS_00011627	109151	Chd9	lncRNA	2.97951	0.92774	1.68328	5.42e-05	0.011849
mmu-miR-378d	11.108	1.76218	1.9113	0.0035242	0.030881	TCONS_00011360	234214	Sorbs2	lncRNA	9.01319	18.2657	-1.01903	0.000457682	0.0174299
mmu-miR-378d	11.108	1.76218	1.9113	0.0035242	0.030881	XR_004941109.1	118568566	LOC118568566	lncRNA	0.823174	2.67283	-1.6991	0.00289617	0.0471589
mmu-miR-378d	11.108	1.76218	1.9113	0.0035242	0.030881	XR_867957.2	105244634	Gm12701	lncRNA	1.073	3.43468	-1.67852	0.0013969	0.0316638
mmu-miR-378d	11.108	1.76218	1.9113	0.0035242	0.030881	NR_045269.2	100503849	Sp3os	lncRNA	0.949198	3.11666	-1.71522	0.00271694	0.0450713
mmu-miR-378d	11.108	1.76218	1.9113	0.0035242	0.030881	NR_045170.1	328186	Gm10336	lncRNA	53.1293	12.3891	2.10044	0.000278123	0.0131339
mmu-miR-181d-5p	535.967	223.671	1.1845	0.00015016	0.0025878	XR_004941109.1	118568566	LOC118568566	lncRNA	0.823174	2.67283	-1.6991	0.00289617	0.0471589
mmu-miR-181d-5p	535.967	223.671	1.1845	0.00015016	0.0025878	TCONS_00004800	118449	Synpo2	lncRNA	0	1.0568	#NAME?	0.000208101	0.011849
mmu-miR-181d-5p	535.967	223.671	1.1845	0.00015016	0.0025878	XR_867957.2	105244634	Gm12701	lncRNA	1.073	3.43468	-1.67852	0.0013969	0.0316638
mmu-miR-467b-5p	236.169	74.3697	1.608	1.45e-08	1.07e-06	XR_004941109.1	118568566	LOC118568566	lncRNA	0.823174	2.67283	-1.6991	0.00289617	0.0471589
mmu-miR-467b-5p	236.169	74.3697	1.608	1.45e-08	1.07e-06	XR_386629.3	102638787	Gm35268	lncRNA	4.21375	0.927016	2.18444	0.00165468	0.0342949
mmu-miR-467b-5p	236.169	74.3697	1.608	1.45e-08	1.07e-06	XR_867957.2	105244634	Gm12701	lncRNA	1.073	3.43468	-1.67852	0.0013969	0.0316638
mmu-miR-467b-5p	236.169	74.3697	1.608	1.45e-08	1.07e-06	TCONS_00004800	118449	Synpo2	lncRNA	0	1.0568	#NAME?	0.000208101	0.011849
mmu-let-7i-5p	28438.5	10750.5	1.3361	6.51e-06	0.00024038	XR_867957.2	105244634	Gm12701	lncRNA	1.073	3.43468	-1.67852	0.0013969	0.0316638
mmu-let-7i-5p	28438.5	10750.5	1.3361	6.51e-06	0.00024038	XR_004941109.1	118568566	LOC118568566	lncRNA	0.823174	2.67283	-1.6991	0.00289617	0.0471589
mmu-let-7i-5p	28438.5	10750.5	1.3361	6.51e-06	0.00024038	TCONS_00011360	234214	Sorbs2	lncRNA	9.01319	18.2657	-1.01903	0.000457682	0.0174299
mmu-let-7i-5p	28438.5	10750.5	1.3361	6.51e-06	0.00024038	TCONS_00011627	109151	Chd9	lncRNA	2.97951	0.92774	1.68328	5.42e-05	0.011849
mmu-let-7i-5p	28438.5	10750.5	1.3361	6.51e-06	0.00024038	NR_168272.1	105246846	Gm42067	lncRNA	4.79058	1.1143	2.10406	0.00150214	0.0328408
mmu-let-7i-5p	28438.5	10750.5	1.3361	6.51e-06	0.00024038	TCONS_00004800	118449	Synpo2	lncRNA	0	1.0568	#NAME?	0.000208101	0.011849
mmu-let-7i-5p	28438.5	10750.5	1.3361	6.51e-06	0.00024038	XR_003950992.1	115488289	Gm52092	lncRNA	3.03919	0.0234093	7.02046	0.000230314	0.0120256
mmu-let-7i-5p	28438.5	10750.5	1.3361	6.51e-06	0.00024038	NR_040309.1	69659	2310069G16Rik	lncRNA	3.4037	0.273044	3.6399	0.00104853	0.027401
mmu-let-7i-5p	28438.5	10750.5	1.3361	6.51e-06	0.00024038	NR_002864.2	353342	Peg13	lncRNA	11.0586	14.1695	-0.35762	0.000235785	0.012135
mmu-let-7i-5p	28438.5	10750.5	1.3361	6.51e-06	0.00024038	TCONS_00002484	13821	Epb41l1	lncRNA	3.42475	1.82929	0.904712	0.0004904	0.0181397
mmu-miR-125a-5p	1892.64	3979.92	-1.0238	0.00037265	0.0052929	XR_867957.2	105244634	Gm12701	lncRNA	1.073	3.43468	-1.67852	0.0013969	0.0316638
mmu-miR-125a-5p	1892.64	3979.92	-1.0238	0.00037265	0.0052929	XR_004941109.1	118568566	LOC118568566	lncRNA	0.823174	2.67283	-1.6991	0.00289617	0.0471589
mmu-miR-125a-5p	1892.64	3979.92	-1.0238	0.00037265	0.0052929	TCONS_00013019	102633035	Gm28979	lncRNA	2.46551	0.005822	8.72616	0.0012027	0.0291759
mmu-miR-125a-5p	1892.64	3979.92	-1.0238	0.00037265	0.0052929	TCONS_00002484	13821	Epb41l1	lncRNA	3.42475	1.82929	0.904712	0.0004904	0.0181397
mmu-miR-208b-5p	0	17.2774	-2.2496	0.0011298	0.013276	NR_168057.1	665054	D330025C20Rik	lncRNA	0.547646	2.62315	-2.25998	0.000854131	0.0245945
mmu-miR-208b-5p	0	17.2774	-2.2496	0.0011298	0.013276	TCONS_00011360	234214	Sorbs2	lncRNA	9.01319	18.2657	-1.01903	0.000457682	0.0174299
mmu-miR-208b-5p	0	17.2774	-2.2496	0.0011298	0.013276	NR_166471.1	402730	Foxo6os	lncRNA	7.14892	0.057763	6.95144	0.000112968	0.011849
mmu-miR-208b-5p	0	17.2774	-2.2496	0.0011298	0.013276	XR_867957.2	105244634	Gm12701	lncRNA	1.073	3.43468	-1.67852	0.0013969	0.0316638
mmu-miR-208b-5p	0	17.2774	-2.2496	0.0011298	0.013276	TCONS_00013019	102633035	Gm28979	lncRNA	2.46551	0.005822	8.72616	0.0012027	0.0291759
mmu-miR-7225-5p	27.4892	2.81906	2.0247	0.0022026	0.02324	NR_168057.1	665054	D330025C20Rik	lncRNA	0.547646	2.62315	-2.25998	0.000854131	0.0245945
mmu-miR-30a-3p	4544.95	2874.61	0.64554	0.0016442	0.017709	TCONS_00013019	102633035	Gm28979	lncRNA	2.46551	0.005822	8.72616	0.0012027	0.0291759
mmu-miR-30a-3p	4544.95	2874.61	0.64554	0.0016442	0.017709	XR_004941109.1	118568566	LOC118568566	lncRNA	0.823174	2.67283	-1.6991	0.00289617	0.0471589
mmu-miR-30a-3p	4544.95	2874.61	0.64554	0.0016442	0.017709	TCONS_00011360	234214	Sorbs2	lncRNA	9.01319	18.2657	-1.01903	0.000457682	0.0174299
mmu-miR-30a-3p	4544.95	2874.61	0.64554	0.0016442	0.017709	XR_867957.2	105244634	Gm12701	lncRNA	1.073	3.43468	-1.67852	0.0013969	0.0316638
mmu-miR-30a-3p	4544.95	2874.61	0.64554	0.0016442	0.017709	XR_001779774.2	102640859	Gm36827	lncRNA	3.46376	0.637569	2.44169	0.00187891	0.0369923
mmu-miR-30a-3p	4544.95	2874.61	0.64554	0.0016442	0.017709	XR_871656.2	102640859	Gm36827	lncRNA	0	5.33212	#NAME?	7.31e-05	0.011849
mmu-miR-30a-3p	4544.95	2874.61	0.64554	0.0016442	0.017709	NR_168057.1	665054	D330025C20Rik	lncRNA	0.547646	2.62315	-2.25998	0.000854131	0.0245945
mmu-miR-30a-3p	4544.95	2874.61	0.64554	0.0016442	0.017709	XR_380324.2	102640859	Gm36827	lncRNA	2.30774	0.259223	3.15422	4.59e-06	0.00722416
mmu-miR-30a-3p	4544.95	2874.61	0.64554	0.0016442	0.017709	TCONS_00004800	118449	Synpo2	lncRNA	0	1.0568	#NAME?	0.000208101	0.011849
mmu-miR-221-3p	700.801	1661.58	-1.2025	3.15e-06	0.00012991	XR_380324.2	102640859	Gm36827	lncRNA	2.30774	0.259223	3.15422	4.59e-06	0.00722416
mmu-miR-221-3p	700.801	1661.58	-1.2025	3.15e-06	0.00012991	XR_003950992.1	115488289	Gm52092	lncRNA	3.03919	0.0234093	7.02046	0.000230314	0.0120256
mmu-miR-221-3p	700.801	1661.58	-1.2025	3.15e-06	0.00012991	XR_867957.2	105244634	Gm12701	lncRNA	1.073	3.43468	-1.67852	0.0013969	0.0316638
mmu-miR-221-3p	700.801	1661.58	-1.2025	3.15e-06	0.00012991	XR_001779774.2	102640859	Gm36827	lncRNA	3.46376	0.637569	2.44169	0.00187891	0.0369923
mmu-miR-221-3p	700.801	1661.58	-1.2025	3.15e-06	0.00012991	TCONS_00013019	102633035	Gm28979	lncRNA	2.46551	0.005822	8.72616	0.0012027	0.0291759
mmu-miR-221-3p	700.801	1661.58	-1.2025	3.15e-06	0.00012991	XR_871656.2	102640859	Gm36827	lncRNA	0	5.33212	#NAME?	7.31e-05	0.011849
mmu-miR-146a-5p	5762.68	836.554	2.5811	6.34e-13	8.19e-11	NR_033503.1	320301	E530011L22Rik	lncRNA	0.0857537	1.51838	-4.14619	0.00156036	0.0335072
mmu-miR-146a-5p	5762.68	836.554	2.5811	6.34e-13	8.19e-11	XR_867957.2	105244634	Gm12701	lncRNA	1.073	3.43468	-1.67852	0.0013969	0.0316638
mmu-miR-146a-5p	5762.68	836.554	2.5811	6.34e-13	8.19e-11	TCONS_00011360	234214	Sorbs2	lncRNA	9.01319	18.2657	-1.01903	0.000457682	0.0174299
mmu-miR-146a-5p	5762.68	836.554	2.5811	6.34e-13	8.19e-11	XR_004941109.1	118568566	LOC118568566	lncRNA	0.823174	2.67283	-1.6991	0.00289617	0.0471589
mmu-miR-146a-5p	5762.68	836.554	2.5811	6.34e-13	8.19e-11	TCONS_00011627	109151	Chd9	lncRNA	2.97951	0.92774	1.68328	5.42e-05	0.011849
mmu-miR-146a-5p	5762.68	836.554	2.5811	6.34e-13	8.19e-11	TCONS_00013019	102633035	Gm28979	lncRNA	2.46551	0.005822	8.72616	0.0012027	0.0291759
mmu-miR-146a-5p	5762.68	836.554	2.5811	6.34e-13	8.19e-11	TCONS_00004800	118449	Synpo2	lncRNA	0	1.0568	#NAME?	0.000208101	0.011849
mmu-miR-146a-5p	5762.68	836.554	2.5811	6.34e-13	8.19e-11	TCONS_00002484	13821	Epb41l1	lncRNA	3.42475	1.82929	0.904712	0.0004904	0.0181397
mmu-miR-126b-5p	1884.61	126.234	3.4186	8.35e-14	1.44e-11	XR_867957.2	105244634	Gm12701	lncRNA	1.073	3.43468	-1.67852	0.0013969	0.0316638
mmu-miR-126b-5p	1884.61	126.234	3.4186	8.35e-14	1.44e-11	TCONS_00004800	118449	Synpo2	lncRNA	0	1.0568	#NAME?	0.000208101	0.011849
mmu-miR-126b-5p	1884.61	126.234	3.4186	8.35e-14	1.44e-11	XR_004941109.1	118568566	LOC118568566	lncRNA	0.823174	2.67283	-1.6991	0.00289617	0.0471589
mmu-miR-30f	3320.14	885.449	1.5423	0.0046878	0.039731	TCONS_00002484	13821	Epb41l1	lncRNA	3.42475	1.82929	0.904712	0.0004904	0.0181397
mmu-miR-30f	3320.14	885.449	1.5423	0.0046878	0.039731	NR_045170.1	328186	Gm10336	lncRNA	53.1293	12.3891	2.10044	0.000278123	0.0131339
mmu-miR-30f	3320.14	885.449	1.5423	0.0046878	0.039731	NR_045269.2	100503849	Sp3os	lncRNA	0.949198	3.11666	-1.71522	0.00271694	0.0450713
mmu-miR-30f	3320.14	885.449	1.5423	0.0046878	0.039731	TCONS_00011627	109151	Chd9	lncRNA	2.97951	0.92774	1.68328	5.42e-05	0.011849
mmu-miR-30f	3320.14	885.449	1.5423	0.0046878	0.039731	TCONS_00011360	234214	Sorbs2	lncRNA	9.01319	18.2657	-1.01903	0.000457682	0.0174299
mmu-miR-30f	3320.14	885.449	1.5423	0.0046878	0.039731	XR_867957.2	105244634	Gm12701	lncRNA	1.073	3.43468	-1.67852	0.0013969	0.0316638
mmu-miR-24-1-5p	208.853	59.9786	1.6277	0.00016746	0.0027055	NR_045170.1	328186	Gm10336	lncRNA	53.1293	12.3891	2.10044	0.000278123	0.0131339
mmu-miR-24-1-5p	208.853	59.9786	1.6277	0.00016746	0.0027055	TCONS_00011627	109151	Chd9	lncRNA	2.97951	0.92774	1.68328	5.42e-05	0.011849
mmu-miR-24-1-5p	208.853	59.9786	1.6277	0.00016746	0.0027055	XR_004941109.1	118568566	LOC118568566	lncRNA	0.823174	2.67283	-1.6991	0.00289617	0.0471589
mmu-miR-24-1-5p	208.853	59.9786	1.6277	0.00016746	0.0027055	XR_001779774.2	102640859	Gm36827	lncRNA	3.46376	0.637569	2.44169	0.00187891	0.0369923
mmu-miR-24-1-5p	208.853	59.9786	1.6277	0.00016746	0.0027055	NR_002864.2	353342	Peg13	lncRNA	11.0586	14.1695	-0.35762	0.000235785	0.012135
mmu-miR-24-1-5p	208.853	59.9786	1.6277	0.00016746	0.0027055	XR_871656.2	102640859	Gm36827	lncRNA	0	5.33212	#NAME?	7.31e-05	0.011849
mmu-miR-24-1-5p	208.853	59.9786	1.6277	0.00016746	0.0027055	NR_131913.1	100996933	Lincred1	lncRNA	0.373112	2.21895	-2.57219	7.62e-07	0.00539961
mmu-miR-24-1-5p	208.853	59.9786	1.6277	0.00016746	0.0027055	XR_380324.2	102640859	Gm36827	lncRNA	2.30774	0.259223	3.15422	4.59e-06	0.00722416
mmu-miR-24-1-5p	208.853	59.9786	1.6277	0.00016746	0.0027055	XR_003950992.1	115488289	Gm52092	lncRNA	3.03919	0.0234093	7.02046	0.000230314	0.0120256
mmu-miR-24-1-5p	208.853	59.9786	1.6277	0.00016746	0.0027055	TCONS_00004800	118449	Synpo2	lncRNA	0	1.0568	#NAME?	0.000208101	0.011849
mmu-miR-208a-5p	77.9443	1.24949	4.5637	1.3e-15	6.71e-13	TCONS_00004800	118449	Synpo2	lncRNA	0	1.0568	#NAME?	0.000208101	0.011849
mmu-miR-208a-5p	77.9443	1.24949	4.5637	1.3e-15	6.71e-13	NR_166471.1	402730	Foxo6os	lncRNA	7.14892	0.057763	6.95144	0.000112968	0.011849
mmu-miR-208a-5p	77.9443	1.24949	4.5637	1.3e-15	6.71e-13	XR_380324.2	102640859	Gm36827	lncRNA	2.30774	0.259223	3.15422	4.59e-06	0.00722416
mmu-miR-208a-5p	77.9443	1.24949	4.5637	1.3e-15	6.71e-13	XR_871656.2	102640859	Gm36827	lncRNA	0	5.33212	#NAME?	7.31e-05	0.011849
mmu-miR-208a-5p	77.9443	1.24949	4.5637	1.3e-15	6.71e-13	XR_001779774.2	102640859	Gm36827	lncRNA	3.46376	0.637569	2.44169	0.00187891	0.0369923
mmu-miR-208a-5p	77.9443	1.24949	4.5637	1.3e-15	6.71e-13	XR_867957.2	105244634	Gm12701	lncRNA	1.073	3.43468	-1.67852	0.0013969	0.0316638
mmu-miR-208a-5p	77.9443	1.24949	4.5637	1.3e-15	6.71e-13	TCONS_00011360	234214	Sorbs2	lncRNA	9.01319	18.2657	-1.01903	0.000457682	0.0174299
mmu-miR-208a-5p	77.9443	1.24949	4.5637	1.3e-15	6.71e-13	XR_004941109.1	118568566	LOC118568566	lncRNA	0.823174	2.67283	-1.6991	0.00289617	0.0471589
mmu-miR-208a-5p	77.9443	1.24949	4.5637	1.3e-15	6.71e-13	TCONS_00013019	102633035	Gm28979	lncRNA	2.46551	0.005822	8.72616	0.0012027	0.0291759
mmu-miR-690	225.56	871.261	-1.6877	0.00036741	0.0052929	NR_045170.1	328186	Gm10336	lncRNA	53.1293	12.3891	2.10044	0.000278123	0.0131339
mmu-miR-690	225.56	871.261	-1.6877	0.00036741	0.0052929	XR_867957.2	105244634	Gm12701	lncRNA	1.073	3.43468	-1.67852	0.0013969	0.0316638
mmu-miR-690	225.56	871.261	-1.6877	0.00036741	0.0052929	XR_871656.2	102640859	Gm36827	lncRNA	0	5.33212	#NAME?	7.31e-05	0.011849
mmu-miR-690	225.56	871.261	-1.6877	0.00036741	0.0052929	NR_002864.2	353342	Peg13	lncRNA	11.0586	14.1695	-0.35762	0.000235785	0.012135
mmu-miR-690	225.56	871.261	-1.6877	0.00036741	0.0052929	XR_001779774.2	102640859	Gm36827	lncRNA	3.46376	0.637569	2.44169	0.00187891	0.0369923
mmu-miR-690	225.56	871.261	-1.6877	0.00036741	0.0052929	TCONS_00004800	118449	Synpo2	lncRNA	0	1.0568	#NAME?	0.000208101	0.011849
mmu-miR-690	225.56	871.261	-1.6877	0.00036741	0.0052929	XR_003950992.1	115488289	Gm52092	lncRNA	3.03919	0.0234093	7.02046	0.000230314	0.0120256
mmu-miR-690	225.56	871.261	-1.6877	0.00036741	0.0052929	XR_380324.2	102640859	Gm36827	lncRNA	2.30774	0.259223	3.15422	4.59e-06	0.00722416
mmu-miR-320-3p	323.772	549.072	-0.72968	0.0060649	0.048239	XR_867957.2	105244634	Gm12701	lncRNA	1.073	3.43468	-1.67852	0.0013969	0.0316638
mmu-miR-320-3p	323.772	549.072	-0.72968	0.0060649	0.048239	XR_004941109.1	118568566	LOC118568566	lncRNA	0.823174	2.67283	-1.6991	0.00289617	0.0471589
mmu-miR-320-3p	323.772	549.072	-0.72968	0.0060649	0.048239	TCONS_00011360	234214	Sorbs2	lncRNA	9.01319	18.2657	-1.01903	0.000457682	0.0174299
mmu-miR-320-3p	323.772	549.072	-0.72968	0.0060649	0.048239	TCONS_00011627	109151	Chd9	lncRNA	2.97951	0.92774	1.68328	5.42e-05	0.011849
mmu-miR-320-3p	323.772	549.072	-0.72968	0.0060649	0.048239	XR_880771.2	105247026	Gm42208	lncRNA	0.641111	2.68801	-2.06789	0.000464833	0.017514
mmu-miR-320-3p	323.772	549.072	-0.72968	0.0060649	0.048239	TCONS_00004800	118449	Synpo2	lncRNA	0	1.0568	#NAME?	0.000208101	0.011849
mmu-miR-320-3p	323.772	549.072	-0.72968	0.0060649	0.048239	XR_003950992.1	115488289	Gm52092	lncRNA	3.03919	0.0234093	7.02046	0.000230314	0.0120256
mmu-miR-320-3p	323.772	549.072	-0.72968	0.0060649	0.048239	XR_380324.2	102640859	Gm36827	lncRNA	2.30774	0.259223	3.15422	4.59e-06	0.00722416
mmu-miR-320-3p	323.772	549.072	-0.72968	0.0060649	0.048239	NR_015601.1	68128	Fam120aos	lncRNA	0.71075	4.03274	-2.50435	0.000170868	0.011849
mmu-miR-320-3p	323.772	549.072	-0.72968	0.0060649	0.048239	NR_040309.1	69659	2310069G16Rik	lncRNA	3.4037	0.273044	3.6399	0.00104853	0.027401
mmu-miR-320-3p	323.772	549.072	-0.72968	0.0060649	0.048239	XR_871656.2	102640859	Gm36827	lncRNA	0	5.33212	#NAME?	7.31e-05	0.011849
mmu-miR-320-3p	323.772	549.072	-0.72968	0.0060649	0.048239	NR_002864.2	353342	Peg13	lncRNA	11.0586	14.1695	-0.35762	0.000235785	0.012135
mmu-miR-320-3p	323.772	549.072	-0.72968	0.0060649	0.048239	TCONS_00002484	13821	Epb41l1	lncRNA	3.42475	1.82929	0.904712	0.0004904	0.0181397
mmu-miR-320-3p	323.772	549.072	-0.72968	0.0060649	0.048239	XR_001779774.2	102640859	Gm36827	lncRNA	3.46376	0.637569	2.44169	0.00187891	0.0369923
mmu-miR-299a-5p	1.41514	11.108	-1.8509	0.0054181	0.044463	TCONS_00011627	109151	Chd9	lncRNA	2.97951	0.92774	1.68328	5.42e-05	0.011849
mmu-miR-299a-5p	1.41514	11.108	-1.8509	0.0054181	0.044463	NR_033503.1	320301	E530011L22Rik	lncRNA	0.0857537	1.51838	-4.14619	0.00156036	0.0335072
mmu-miR-339-3p	138.548	49.9655	1.3323	0.000508	0.0067343	XR_004941109.1	118568566	LOC118568566	lncRNA	0.823174	2.67283	-1.6991	0.00289617	0.0471589
mmu-miR-339-3p	138.548	49.9655	1.3323	0.000508	0.0067343	XR_867957.2	105244634	Gm12701	lncRNA	1.073	3.43468	-1.67852	0.0013969	0.0316638

## Sheet: HypoTH+T3 vs HypoTH
sRNA	HypoTH+T3_readcount	HypoTH_readcount	log2FoldChange	pval	padj	Transcript	gene_id	gene_name	feature	HypoTH+T3.value	HypoTH.value	log2foldchange	pvalue	qvalue
mmu-let-7f-1-3p	15.4173	2.80579	2.0319	0.00060158	0.0054565	NR_015601.1	68128	Fam120aos	lncRNA	0.867213	4.03274	-2.2173	3.14e-05	0.01818
mmu-let-7i-5p	25270.9	10398.1	1.2459	2.5e-07	6.15e-06	XR_003950992.1	115488289	Gm52092	lncRNA	2.02625	0.0234093	6.43559	0.000126584	0.0269876
mmu-miR-1195	0.807496	14.2187	-2.626	0.00014247	0.0016013	XR_003950992.1	115488289	Gm52092	lncRNA	2.02625	0.0234093	6.43559	0.000126584	0.0269876
mmu-miR-1247-5p	5.40653	0.204505	2.1259	0.0031344	0.021322	NR_015601.1	68128	Fam120aos	lncRNA	0.867213	4.03274	-2.2173	3.14e-05	0.01818
mmu-miR-128-3p	11896.8	4000.13	1.4143	0.0014983	0.011392	TCONS_00022791	319720	9630028I04Rik	lncRNA	0.00352633	3.75332	-10.0558	0.00026083	0.036167
mmu-miR-132-5p	316.668	119.65	1.3393	0.00011815	0.0013574	XR_003950992.1	115488289	Gm52092	lncRNA	2.02625	0.0234093	6.43559	0.000126584	0.0269876
mmu-miR-140-3p	2248.52	5911.09	-1.3379	5.05e-06	9e-05	XR_376121.3	102633985	Gm31678	lncRNA	0.594435	2.50116	-2.07301	0.000752847	0.0481405
mmu-miR-140-3p	2248.52	5911.09	-1.3379	5.05e-06	9e-05	XR_003950992.1	115488289	Gm52092	lncRNA	2.02625	0.0234093	6.43559	0.000126584	0.0269876
mmu-miR-150-5p	402.188	1577.05	-1.8397	7.51e-07	1.62e-05	XR_003950992.1	115488289	Gm52092	lncRNA	2.02625	0.0234093	6.43559	0.000126584	0.0269876
mmu-miR-150-5p	402.188	1577.05	-1.8397	7.51e-07	1.62e-05	TCONS_00022791	319720	9630028I04Rik	lncRNA	0.00352633	3.75332	-10.0558	0.00026083	0.036167
mmu-miR-15b-5p	49.1991	140.916	-1.4536	2.75e-06	5.08e-05	TCONS_00022791	319720	9630028I04Rik	lncRNA	0.00352633	3.75332	-10.0558	0.00026083	0.036167
mmu-miR-15b-5p	49.1991	140.916	-1.4536	2.75e-06	5.08e-05	XR_003950992.1	115488289	Gm52092	lncRNA	2.02625	0.0234093	6.43559	0.000126584	0.0269876
mmu-miR-1983	48.2403	21.07	1.0417	0.0045047	0.028402	XR_376121.3	102633985	Gm31678	lncRNA	0.594435	2.50116	-2.07301	0.000752847	0.0481405
mmu-miR-1983	48.2403	21.07	1.0417	0.0045047	0.028402	TCONS_00022791	319720	9630028I04Rik	lncRNA	0.00352633	3.75332	-10.0558	0.00026083	0.036167
mmu-miR-19b-3p	3.07231	20.4514	-2.0891	0.00076926	0.0066285	XR_003950992.1	115488289	Gm52092	lncRNA	2.02625	0.0234093	6.43559	0.000126584	0.0269876
mmu-miR-200a-3p	13.3935	99.7631	-2.0857	0.0015484	0.011602	XR_003950992.1	115488289	Gm52092	lncRNA	2.02625	0.0234093	6.43559	0.000126584	0.0269876
mmu-miR-200b-3p	18.0605	64.4443	-1.7656	1.63e-08	5.91e-07	XR_003950992.1	115488289	Gm52092	lncRNA	2.02625	0.0234093	6.43559	0.000126584	0.0269876
mmu-miR-204-5p	817.427	382.884	1.0685	6.11e-09	2.87e-07	NR_015601.1	68128	Fam120aos	lncRNA	0.867213	4.03274	-2.2173	3.14e-05	0.01818
mmu-miR-208a-3p	124.325	13.6525	2.603	8.58e-07	1.77e-05	XR_003950992.1	115488289	Gm52092	lncRNA	2.02625	0.0234093	6.43559	0.000126584	0.0269876
mmu-miR-210-3p	55.7165	232.869	-1.8388	7.51e-05	0.0010215	TCONS_00022791	319720	9630028I04Rik	lncRNA	0.00352633	3.75332	-10.0558	0.00026083	0.036167
mmu-miR-214-3p	131.985	615.853	-2.1886	4.95e-37	2.56e-34	XR_003950992.1	115488289	Gm52092	lncRNA	2.02625	0.0234093	6.43559	0.000126584	0.0269876
mmu-miR-221-3p	789.396	1605.03	-0.99143	0.00015529	0.0017082	XR_003950992.1	115488289	Gm52092	lncRNA	2.02625	0.0234093	6.43559	0.000126584	0.0269876
mmu-miR-224-5p	188.792	126.534	0.56024	0.007271	0.040863	TCONS_00022791	319720	9630028I04Rik	lncRNA	0.00352633	3.75332	-10.0558	0.00026083	0.036167
mmu-miR-22-5p	2541.73	747.624	1.7144	6.99e-13	5.16e-11	TCONS_00022791	319720	9630028I04Rik	lncRNA	0.00352633	3.75332	-10.0558	0.00026083	0.036167
mmu-miR-22-5p	2541.73	747.624	1.7144	6.99e-13	5.16e-11	XR_003950992.1	115488289	Gm52092	lncRNA	2.02625	0.0234093	6.43559	0.000126584	0.0269876
mmu-miR-24-1-5p	249.633	58.2936	1.9861	1.68e-07	4.58e-06	XR_003950992.1	115488289	Gm52092	lncRNA	2.02625	0.0234093	6.43559	0.000126584	0.0269876
mmu-miR-24-2-5p	2795.64	938.596	1.4515	0.00028983	0.0029969	XR_003950992.1	115488289	Gm52092	lncRNA	2.02625	0.0234093	6.43559	0.000126584	0.0269876
mmu-miR-25-3p	4030.61	1891.74	1.0713	8.37e-08	2.55e-06	XR_003950992.1	115488289	Gm52092	lncRNA	2.02625	0.0234093	6.43559	0.000126584	0.0269876
mmu-miR-320-3p	202.313	532.631	-1.3422	3.59e-07	8.07e-06	XR_003950992.1	115488289	Gm52092	lncRNA	2.02625	0.0234093	6.43559	0.000126584	0.0269876
mmu-miR-320-3p	202.313	532.631	-1.3422	3.59e-07	8.07e-06	NR_015601.1	68128	Fam120aos	lncRNA	0.867213	4.03274	-2.2173	3.14e-05	0.01818
mmu-miR-3470b	44.9634	239.472	-2.099	2.37e-05	0.00037089	XR_003950992.1	115488289	Gm52092	lncRNA	2.02625	0.0234093	6.43559	0.000126584	0.0269876
mmu-miR-365-3p	75.1201	264.181	-1.5633	0.0023006	0.016073	XR_003950992.1	115488289	Gm52092	lncRNA	2.02625	0.0234093	6.43559	0.000126584	0.0269876
mmu-miR-378d	10.3009	1.72086	1.9873	0.0034523	0.02318	TCONS_00022791	319720	9630028I04Rik	lncRNA	0.00352633	3.75332	-10.0558	0.00026083	0.036167
mmu-miR-378d	10.3009	1.72086	1.9873	0.0034523	0.02318	XR_003950992.1	115488289	Gm52092	lncRNA	2.02625	0.0234093	6.43559	0.000126584	0.0269876
mmu-miR-425-3p	21.0111	70.9172	-1.6248	8.62e-05	0.0011144	TCONS_00022791	319720	9630028I04Rik	lncRNA	0.00352633	3.75332	-10.0558	0.00026083	0.036167
mmu-miR-455-3p	86.9997	324.371	-1.6736	0.00036845	0.0034634	TCONS_00022791	319720	9630028I04Rik	lncRNA	0.00352633	3.75332	-10.0558	0.00026083	0.036167
mmu-miR-466i-5p	11.3436	250.022	-3.3098	2.23e-07	5.76e-06	TCONS_00022791	319720	9630028I04Rik	lncRNA	0.00352633	3.75332	-10.0558	0.00026083	0.036167
mmu-miR-466i-5p	11.3436	250.022	-3.3098	2.23e-07	5.76e-06	XR_003950992.1	115488289	Gm52092	lncRNA	2.02625	0.0234093	6.43559	0.000126584	0.0269876
mmu-miR-467b-5p	257.782	72.0484	1.7698	1.71e-08	5.91e-07	TCONS_00022791	319720	9630028I04Rik	lncRNA	0.00352633	3.75332	-10.0558	0.00026083	0.036167
mmu-miR-490-3p	287.586	944.168	-1.4997	0.0022663	0.016051	NR_015601.1	68128	Fam120aos	lncRNA	0.867213	4.03274	-2.2173	3.14e-05	0.01818
mmu-miR-490-3p	287.586	944.168	-1.4997	0.0022663	0.016051	TCONS_00022791	319720	9630028I04Rik	lncRNA	0.00352633	3.75332	-10.0558	0.00026083	0.036167
mmu-miR-490-5p	139.544	52.994	1.333	0.00072285	0.0063341	XR_003950992.1	115488289	Gm52092	lncRNA	2.02625	0.0234093	6.43559	0.000126584	0.0269876
mmu-miR-497b	7.65798	0.613514	1.9428	0.0050265	0.030937	XR_376121.3	102633985	Gm31678	lncRNA	0.594435	2.50116	-2.07301	0.000752847	0.0481405
mmu-miR-497b	7.65798	0.613514	1.9428	0.0050265	0.030937	XR_003950992.1	115488289	Gm52092	lncRNA	2.02625	0.0234093	6.43559	0.000126584	0.0269876
mmu-miR-664-3p	52.3644	153.215	-1.4625	1.32e-05	0.00022032	XR_003950992.1	115488289	Gm52092	lncRNA	2.02625	0.0234093	6.43559	0.000126584	0.0269876
mmu-miR-664-5p	12.9626	34.1613	-1.2563	0.0061022	0.036684	XR_003950992.1	115488289	Gm52092	lncRNA	2.02625	0.0234093	6.43559	0.000126584	0.0269876
mmu-miR-690	231.678	846.355	-1.6235	0.0011987	0.0092495	XR_003950992.1	115488289	Gm52092	lncRNA	2.02625	0.0234093	6.43559	0.000126584	0.0269876
mmu-miR-7015-3p	16.0724	2.47904	1.9077	0.0063078	0.037484	XR_003950992.1	115488289	Gm52092	lncRNA	2.02625	0.0234093	6.43559	0.000126584	0.0269876
mmu-miR-7068-3p	11.4707	2.53888	1.675	0.0066548	0.038658	XR_003950992.1	115488289	Gm52092	lncRNA	2.02625	0.0234093	6.43559	0.000126584	0.0269876
mmu-miR-708-5p	0.645759	8.17058	-2.4036	0.00033808	0.0032368	TCONS_00022791	319720	9630028I04Rik	lncRNA	0.00352633	3.75332	-10.0558	0.00026083	0.036167
mmu-miR-708-5p	0.645759	8.17058	-2.4036	0.00033808	0.0032368	XR_003950992.1	115488289	Gm52092	lncRNA	2.02625	0.0234093	6.43559	0.000126584	0.0269876
mmu-miR-709	0.185832	7.29016	-2.7589	9.47e-05	0.0011656	TCONS_00022791	319720	9630028I04Rik	lncRNA	0.00352633	3.75332	-10.0558	0.00026083	0.036167
mmu-miR-709	0.185832	7.29016	-2.7589	9.47e-05	0.0011656	XR_003950992.1	115488289	Gm52092	lncRNA	2.02625	0.0234093	6.43559	0.000126584	0.0269876
mmu-miR-709	0.185832	7.29016	-2.7589	9.47e-05	0.0011656	NR_015601.1	68128	Fam120aos	lncRNA	0.867213	4.03274	-2.2173	3.14e-05	0.01818
mmu-miR-744-5p	183.981	428.915	-1.1137	0.006646	0.038658	NR_015601.1	68128	Fam120aos	lncRNA	0.867213	4.03274	-2.2173	3.14e-05	0.01818
mmu-miR-874-3p	17.9858	47.5378	-1.2542	0.0049493	0.030829	XR_003950992.1	115488289	Gm52092	lncRNA	2.02625	0.0234093	6.43559	0.000126584	0.0269876
