# Supplementary material for: Novel Transcriptomic Interactomes of Noncoding RNAs in the Heart under Altered Thyroid Hormonal States
Source: Int J Mol Sci. 2023 Mar 31;24(7):6560. doi: 10.3390/ijms24076560 (PMC10095585; doi:10.3390/ijms24076560)
Supplement: Supplementary file 1 [file ijms-24-06560-s001.zip › Supplemental File S14 lncRNA miRNA mRNA interactions.xlsx]

## Sheet: HypoTH vs Control
Transcript	gene_id	gene_name	feature	HypoTH.value	Control.value	log2foldchange	pvalue	qvalue	sRNA	HypoTH.value	Control.value	log2FoldChange	pval	padj	Transcript	gene_id	gene_name	feature	HypoTH.value	Control.value	log2foldchange	pvalue	qvalue
TCONS_00022949	118568312	LOC118568312	lncRNA	27.2217	0	Inf	0.000820671	0.0276354	mmu-miR-1195	19.6113	1.98363	2.212	0.0004848	0.014336	NM_133702.3	68979	Nol11	transcript	5.69427	3.78451	0.589407	0.00138039	0.0351828
TCONS_00022949	118568312	LOC118568312	lncRNA	27.2217	0	Inf	0.000820671	0.0276354	mmu-miR-1195	19.6113	1.98363	2.212	0.0004848	0.014336	NM_026443.4	67900	Mtfp1	transcript	27.5971	35.7028	-0.37152	0.000338742	0.0276354
TCONS_00022949	118568312	LOC118568312	lncRNA	27.2217	0	Inf	0.000820671	0.0276354	mmu-miR-1195	19.6113	1.98363	2.212	0.0004848	0.014336	NM_019795.5	56354	Dnajc7	transcript	16.878	16.6736	0.0175825	0.000261152	0.0276354
TCONS_00022949	118568312	LOC118568312	lncRNA	27.2217	0	Inf	0.000820671	0.0276354	mmu-miR-1195	19.6113	1.98363	2.212	0.0004848	0.014336	NM_001012765.5	224129	Adcy5	transcript	21.2562	9.04944	1.23198	0.0014541	0.0359344
TCONS_00022949	118568312	LOC118568312	lncRNA	27.2217	0	Inf	0.000820671	0.0276354	mmu-miR-1195	19.6113	1.98363	2.212	0.0004848	0.014336	NM_001355651.1	74182	Gpcpd1	transcript	1.98661	0.186929	3.40975	0.00197354	0.041549
TCONS_00022949	118568312	LOC118568312	lncRNA	27.2217	0	Inf	0.000820671	0.0276354	mmu-miR-1195	19.6113	1.98363	2.212	0.0004848	0.014336	TCONS_00022043	20656	Sod2	transcript	6.07359	0.19545	4.95768	0.0002461	0.0276354
TCONS_00022949	118568312	LOC118568312	lncRNA	27.2217	0	Inf	0.000820671	0.0276354	mmu-miR-1195	19.6113	1.98363	2.212	0.0004848	0.014336	NM_019584.4	56208	Becn1	transcript	13.0022	11.7526	0.145775	0.00117987	0.0327408
TCONS_00022949	118568312	LOC118568312	lncRNA	27.2217	0	Inf	0.000820671	0.0276354	mmu-miR-1195	19.6113	1.98363	2.212	0.0004848	0.014336	XM_036165784.1	12321	Calu	transcript	10.5439	16.3948	-0.636826	0.00157708	0.0372453
TCONS_00022949	118568312	LOC118568312	lncRNA	27.2217	0	Inf	0.000820671	0.0276354	mmu-miR-1195	19.6113	1.98363	2.212	0.0004848	0.014336	XM_030243724.1	80914	Uck2	transcript	2.38203	0.0179517	7.05193	0.000395132	0.0276354
TCONS_00022949	118568312	LOC118568312	lncRNA	27.2217	0	Inf	0.000820671	0.0276354	mmu-miR-1195	19.6113	1.98363	2.212	0.0004848	0.014336	NM_001081242.2	70549	Tln2	transcript	2.63951	0.0295667	6.48015	0.000371777	0.0276354
TCONS_00022949	118568312	LOC118568312	lncRNA	27.2217	0	Inf	0.000820671	0.0276354	mmu-miR-1195	19.6113	1.98363	2.212	0.0004848	0.014336	NM_028803.4	74185	Gbe1	transcript	10.6125	11.9784	-0.174665	0.00182532	0.0398113
TCONS_00022949	118568312	LOC118568312	lncRNA	27.2217	0	Inf	0.000820671	0.0276354	mmu-miR-1195	19.6113	1.98363	2.212	0.0004848	0.014336	NM_183283.3	69576	Smco1	transcript	1.93158	5.54452	-1.52129	0.000297473	0.0276354
TCONS_00025777	XLOC_015265	-	lncRNA	26.7627	3.52762	2.92345	0.00141511	0.0355126	mmu-miR-1195	19.6113	1.98363	2.212	0.0004848	0.014336	NM_133702.3	68979	Nol11	transcript	5.69427	3.78451	0.589407	0.00138039	0.0351828
TCONS_00025777	XLOC_015265	-	lncRNA	26.7627	3.52762	2.92345	0.00141511	0.0355126	mmu-miR-1195	19.6113	1.98363	2.212	0.0004848	0.014336	NM_026443.4	67900	Mtfp1	transcript	27.5971	35.7028	-0.37152	0.000338742	0.0276354
TCONS_00025777	XLOC_015265	-	lncRNA	26.7627	3.52762	2.92345	0.00141511	0.0355126	mmu-miR-1195	19.6113	1.98363	2.212	0.0004848	0.014336	NM_019795.5	56354	Dnajc7	transcript	16.878	16.6736	0.0175825	0.000261152	0.0276354
TCONS_00025777	XLOC_015265	-	lncRNA	26.7627	3.52762	2.92345	0.00141511	0.0355126	mmu-miR-1195	19.6113	1.98363	2.212	0.0004848	0.014336	NM_001012765.5	224129	Adcy5	transcript	21.2562	9.04944	1.23198	0.0014541	0.0359344
TCONS_00025777	XLOC_015265	-	lncRNA	26.7627	3.52762	2.92345	0.00141511	0.0355126	mmu-miR-1195	19.6113	1.98363	2.212	0.0004848	0.014336	NM_001355651.1	74182	Gpcpd1	transcript	1.98661	0.186929	3.40975	0.00197354	0.041549
TCONS_00025777	XLOC_015265	-	lncRNA	26.7627	3.52762	2.92345	0.00141511	0.0355126	mmu-miR-1195	19.6113	1.98363	2.212	0.0004848	0.014336	TCONS_00022043	20656	Sod2	transcript	6.07359	0.19545	4.95768	0.0002461	0.0276354
TCONS_00025777	XLOC_015265	-	lncRNA	26.7627	3.52762	2.92345	0.00141511	0.0355126	mmu-miR-1195	19.6113	1.98363	2.212	0.0004848	0.014336	NM_019584.4	56208	Becn1	transcript	13.0022	11.7526	0.145775	0.00117987	0.0327408
TCONS_00025777	XLOC_015265	-	lncRNA	26.7627	3.52762	2.92345	0.00141511	0.0355126	mmu-miR-1195	19.6113	1.98363	2.212	0.0004848	0.014336	XM_036165784.1	12321	Calu	transcript	10.5439	16.3948	-0.636826	0.00157708	0.0372453
TCONS_00025777	XLOC_015265	-	lncRNA	26.7627	3.52762	2.92345	0.00141511	0.0355126	mmu-miR-1195	19.6113	1.98363	2.212	0.0004848	0.014336	XM_030243724.1	80914	Uck2	transcript	2.38203	0.0179517	7.05193	0.000395132	0.0276354
TCONS_00025777	XLOC_015265	-	lncRNA	26.7627	3.52762	2.92345	0.00141511	0.0355126	mmu-miR-1195	19.6113	1.98363	2.212	0.0004848	0.014336	NM_001081242.2	70549	Tln2	transcript	2.63951	0.0295667	6.48015	0.000371777	0.0276354
TCONS_00025777	XLOC_015265	-	lncRNA	26.7627	3.52762	2.92345	0.00141511	0.0355126	mmu-miR-1195	19.6113	1.98363	2.212	0.0004848	0.014336	NM_028803.4	74185	Gbe1	transcript	10.6125	11.9784	-0.174665	0.00182532	0.0398113
TCONS_00025777	XLOC_015265	-	lncRNA	26.7627	3.52762	2.92345	0.00141511	0.0355126	mmu-miR-1195	19.6113	1.98363	2.212	0.0004848	0.014336	NM_183283.3	69576	Smco1	transcript	1.93158	5.54452	-1.52129	0.000297473	0.0276354
TCONS_00022951	118568312	LOC118568312	lncRNA	20.3941	0	Inf	0.000820671	0.0276354	mmu-miR-1195	19.6113	1.98363	2.212	0.0004848	0.014336	NM_133702.3	68979	Nol11	transcript	5.69427	3.78451	0.589407	0.00138039	0.0351828
TCONS_00022951	118568312	LOC118568312	lncRNA	20.3941	0	Inf	0.000820671	0.0276354	mmu-miR-1195	19.6113	1.98363	2.212	0.0004848	0.014336	NM_026443.4	67900	Mtfp1	transcript	27.5971	35.7028	-0.37152	0.000338742	0.0276354
TCONS_00022951	118568312	LOC118568312	lncRNA	20.3941	0	Inf	0.000820671	0.0276354	mmu-miR-1195	19.6113	1.98363	2.212	0.0004848	0.014336	NM_019795.5	56354	Dnajc7	transcript	16.878	16.6736	0.0175825	0.000261152	0.0276354
TCONS_00022951	118568312	LOC118568312	lncRNA	20.3941	0	Inf	0.000820671	0.0276354	mmu-miR-1195	19.6113	1.98363	2.212	0.0004848	0.014336	NM_001012765.5	224129	Adcy5	transcript	21.2562	9.04944	1.23198	0.0014541	0.0359344
TCONS_00022951	118568312	LOC118568312	lncRNA	20.3941	0	Inf	0.000820671	0.0276354	mmu-miR-1195	19.6113	1.98363	2.212	0.0004848	0.014336	NM_001355651.1	74182	Gpcpd1	transcript	1.98661	0.186929	3.40975	0.00197354	0.041549
TCONS_00022951	118568312	LOC118568312	lncRNA	20.3941	0	Inf	0.000820671	0.0276354	mmu-miR-1195	19.6113	1.98363	2.212	0.0004848	0.014336	TCONS_00022043	20656	Sod2	transcript	6.07359	0.19545	4.95768	0.0002461	0.0276354
TCONS_00022951	118568312	LOC118568312	lncRNA	20.3941	0	Inf	0.000820671	0.0276354	mmu-miR-1195	19.6113	1.98363	2.212	0.0004848	0.014336	NM_019584.4	56208	Becn1	transcript	13.0022	11.7526	0.145775	0.00117987	0.0327408
TCONS_00022951	118568312	LOC118568312	lncRNA	20.3941	0	Inf	0.000820671	0.0276354	mmu-miR-1195	19.6113	1.98363	2.212	0.0004848	0.014336	XM_036165784.1	12321	Calu	transcript	10.5439	16.3948	-0.636826	0.00157708	0.0372453
TCONS_00022951	118568312	LOC118568312	lncRNA	20.3941	0	Inf	0.000820671	0.0276354	mmu-miR-1195	19.6113	1.98363	2.212	0.0004848	0.014336	XM_030243724.1	80914	Uck2	transcript	2.38203	0.0179517	7.05193	0.000395132	0.0276354
TCONS_00022951	118568312	LOC118568312	lncRNA	20.3941	0	Inf	0.000820671	0.0276354	mmu-miR-1195	19.6113	1.98363	2.212	0.0004848	0.014336	NM_001081242.2	70549	Tln2	transcript	2.63951	0.0295667	6.48015	0.000371777	0.0276354
TCONS_00022951	118568312	LOC118568312	lncRNA	20.3941	0	Inf	0.000820671	0.0276354	mmu-miR-1195	19.6113	1.98363	2.212	0.0004848	0.014336	NM_028803.4	74185	Gbe1	transcript	10.6125	11.9784	-0.174665	0.00182532	0.0398113
TCONS_00022951	118568312	LOC118568312	lncRNA	20.3941	0	Inf	0.000820671	0.0276354	mmu-miR-1195	19.6113	1.98363	2.212	0.0004848	0.014336	NM_183283.3	69576	Smco1	transcript	1.93158	5.54452	-1.52129	0.000297473	0.0276354
TCONS_00023682	12558	Cdh2	lncRNA	5.50214	3.05558	0.848547	0.00218381	0.0438821	mmu-miR-874-3p	67.1603	160.155	-1.1385	0.0024216	0.042104	NM_054046.5	23854	Def8	transcript	8.18934	6.47494	0.33888	0.0016116	0.037419
TCONS_00023682	12558	Cdh2	lncRNA	5.50214	3.05558	0.848547	0.00218381	0.0438821	mmu-miR-874-3p	67.1603	160.155	-1.1385	0.0024216	0.042104	XM_006534391.5	75580	Zbtb4	transcript	1.27003	0	Inf	0.000820671	0.0276354
TCONS_00023682	12558	Cdh2	lncRNA	5.50214	3.05558	0.848547	0.00218381	0.0438821	mmu-miR-874-3p	67.1603	160.155	-1.1385	0.0024216	0.042104	NM_153080.3	216810	Tom1l2	transcript	1.13139	0.017205	6.03913	0.00117465	0.0326745
TCONS_00023682	12558	Cdh2	lncRNA	5.50214	3.05558	0.848547	0.00218381	0.0438821	mmu-miR-874-3p	67.1603	160.155	-1.1385	0.0024216	0.042104	NM_011838.4	23936	Lynx1	transcript	25.7672	40.3626	-0.647487	0.000722116	0.0276354
TCONS_00023682	12558	Cdh2	lncRNA	5.50214	3.05558	0.848547	0.00218381	0.0438821	mmu-miR-874-3p	67.1603	160.155	-1.1385	0.0024216	0.042104	NM_001098225.2	11496	Adam22	transcript	2.58778	0.00525567	8.94362	2.29e-06	0.0151166
TCONS_00023682	12558	Cdh2	lncRNA	5.50214	3.05558	0.848547	0.00218381	0.0438821	mmu-miR-874-3p	67.1603	160.155	-1.1385	0.0024216	0.042104	XM_030253061.2	100273	Osbpl9	transcript	0.913933	0	Inf	0.000964603	0.0297987
TCONS_00023682	12558	Cdh2	lncRNA	5.50214	3.05558	0.848547	0.00218381	0.0438821	mmu-miR-874-3p	67.1603	160.155	-1.1385	0.0024216	0.042104	TCONS_00020016	65246	Xpo7	transcript	4.13029	0.00722533	9.15896	0.00116536	0.0326432
TCONS_00023682	12558	Cdh2	lncRNA	5.50214	3.05558	0.848547	0.00218381	0.0438821	mmu-miR-874-3p	67.1603	160.155	-1.1385	0.0024216	0.042104	TCONS_00023739	76594	Dnajc18	transcript	1.93372	0	Inf	0.000820671	0.0276354
TCONS_00023682	12558	Cdh2	lncRNA	5.50214	3.05558	0.848547	0.00218381	0.0438821	mmu-miR-874-3p	67.1603	160.155	-1.1385	0.0024216	0.042104	TCONS_00006799	68303	Fam114a1	transcript	0.995193	0	Inf	0.000820671	0.0276354
TCONS_00023682	12558	Cdh2	lncRNA	5.50214	3.05558	0.848547	0.00218381	0.0438821	mmu-miR-874-3p	67.1603	160.155	-1.1385	0.0024216	0.042104	NM_172925.2	244923	Klhl31	transcript	25.7365	28.473	-0.145783	0.00102428	0.0304533
TCONS_00023682	12558	Cdh2	lncRNA	5.50214	3.05558	0.848547	0.00218381	0.0438821	mmu-miR-874-3p	67.1603	160.155	-1.1385	0.0024216	0.042104	NM_001347446.1	94089	Trim7	transcript	1.16147	7.15854	-2.62371	0.00045152	0.0276354
TCONS_00023682	12558	Cdh2	lncRNA	5.50214	3.05558	0.848547	0.00218381	0.0438821	mmu-miR-874-3p	67.1603	160.155	-1.1385	0.0024216	0.042104	NM_009818.1	12385	Ctnna1	transcript	89.2245	90.2244	-0.0160775	0.000857497	0.0281337
TCONS_00023682	12558	Cdh2	lncRNA	5.50214	3.05558	0.848547	0.00218381	0.0438821	mmu-miR-874-3p	67.1603	160.155	-1.1385	0.0024216	0.042104	NM_001355755.1	17896	Myl4	transcript	9.13829	0.191058	5.57984	0.00178945	0.0391774
TCONS_00023682	12558	Cdh2	lncRNA	5.50214	3.05558	0.848547	0.00218381	0.0438821	mmu-miR-874-3p	67.1603	160.155	-1.1385	0.0024216	0.042104	XM_036154088.1	319518	Pdpr	transcript	1.61977	3.72043	-1.19968	0.000122455	0.0276354
TCONS_00023682	12558	Cdh2	lncRNA	5.50214	3.05558	0.848547	0.00218381	0.0438821	mmu-miR-874-3p	67.1603	160.155	-1.1385	0.0024216	0.042104	XM_030246370.1	72729	Cdc42se2	transcript	1.75393	0.133176	3.71919	3e-05	0.0155632
TCONS_00023682	12558	Cdh2	lncRNA	5.50214	3.05558	0.848547	0.00218381	0.0438821	mmu-miR-874-3p	67.1603	160.155	-1.1385	0.0024216	0.042104	NM_016709.2	11992	Auh	transcript	23.1108	25.9264	-0.165855	0.00124159	0.0335637
TCONS_00023682	12558	Cdh2	lncRNA	5.50214	3.05558	0.848547	0.00218381	0.0438821	mmu-miR-874-3p	67.1603	160.155	-1.1385	0.0024216	0.042104	TCONS_00022612	225049	Ttc7	transcript	1.28356	2.38495	-0.893809	1.15e-05	0.0155632
TCONS_00023682	12558	Cdh2	lncRNA	5.50214	3.05558	0.848547	0.00218381	0.0438821	mmu-miR-874-3p	67.1603	160.155	-1.1385	0.0024216	0.042104	XM_006517134.5	18193	Nsd1	transcript	1.9852	0.448937	2.1447	0.00060106	0.0276354
TCONS_00023682	12558	Cdh2	lncRNA	5.50214	3.05558	0.848547	0.00218381	0.0438821	mmu-miR-874-3p	67.1603	160.155	-1.1385	0.0024216	0.042104	TCONS_00001035	21961	Tns1	transcript	39.6786	2.46049	4.01134	0.00031257	0.0276354
TCONS_00023682	12558	Cdh2	lncRNA	5.50214	3.05558	0.848547	0.00218381	0.0438821	mmu-miR-874-3p	67.1603	160.155	-1.1385	0.0024216	0.042104	NM_011207.2	545622	Ptpn3	transcript	2.85143	0.047324	5.91297	0.000765875	0.0276354
TCONS_00023682	12558	Cdh2	lncRNA	5.50214	3.05558	0.848547	0.00218381	0.0438821	mmu-miR-874-3p	67.1603	160.155	-1.1385	0.0024216	0.042104	XM_030255147.2	381290	Atp2b4	transcript	1.79149	0	Inf	0.000233871	0.0276354
TCONS_00023682	12558	Cdh2	lncRNA	5.50214	3.05558	0.848547	0.00218381	0.0438821	mmu-miR-874-3p	67.1603	160.155	-1.1385	0.0024216	0.042104	TCONS_00017675	68519	Eml1	transcript	11.0496	10.9045	0.0190772	0.00239943	0.0465183
TCONS_00023682	12558	Cdh2	lncRNA	5.50214	3.05558	0.848547	0.00218381	0.0438821	mmu-miR-874-3p	67.1603	160.155	-1.1385	0.0024216	0.042104	NM_177411.4	19344	Rab5b	transcript	15.3906	17.862	-0.214852	0.000321654	0.0276354
TCONS_00023682	12558	Cdh2	lncRNA	5.50214	3.05558	0.848547	0.00218381	0.0438821	mmu-miR-874-3p	67.1603	160.155	-1.1385	0.0024216	0.042104	NM_023317.2	67203	Nde1	transcript	1.95862	4.78075	-1.2874	2.29e-05	0.0155632
TCONS_00023682	12558	Cdh2	lncRNA	5.50214	3.05558	0.848547	0.00218381	0.0438821	mmu-miR-874-3p	67.1603	160.155	-1.1385	0.0024216	0.042104	NM_025829.4	66892	Eif4e3	transcript	8.06038	15.9332	-0.98312	2.78e-05	0.0155632
TCONS_00023682	12558	Cdh2	lncRNA	5.50214	3.05558	0.848547	0.00218381	0.0438821	mmu-miR-874-3p	67.1603	160.155	-1.1385	0.0024216	0.042104	NM_173866.4	108682	Gpt2	transcript	1.46859	5.47079	-1.89731	0.000818569	0.0276354
TCONS_00023682	12558	Cdh2	lncRNA	5.50214	3.05558	0.848547	0.00218381	0.0438821	mmu-miR-874-3p	67.1603	160.155	-1.1385	0.0024216	0.042104	XM_006524674.5	56468	Socs5	transcript	2.99592	0.0603897	5.63255	0.000527102	0.0276354
TCONS_00023682	12558	Cdh2	lncRNA	5.50214	3.05558	0.848547	0.00218381	0.0438821	mmu-miR-874-3p	67.1603	160.155	-1.1385	0.0024216	0.042104	XM_006517452.5	76577	Faf2	transcript	0.845375	0	Inf	0.000820671	0.0276354
TCONS_00023682	12558	Cdh2	lncRNA	5.50214	3.05558	0.848547	0.00218381	0.0438821	mmu-miR-874-3p	67.1603	160.155	-1.1385	0.0024216	0.042104	NM_145605.2	234825	Klhdc4	transcript	1.15389	3.19303	-1.46842	0.000484263	0.0276354
TCONS_00023682	12558	Cdh2	lncRNA	5.50214	3.05558	0.848547	0.00218381	0.0438821	mmu-miR-874-3p	67.1603	160.155	-1.1385	0.0024216	0.042104	NM_177322.3	11607	Agtr1a	transcript	16.509	9.02107	0.871884	1.52e-05	0.0155632
TCONS_00023682	12558	Cdh2	lncRNA	5.50214	3.05558	0.848547	0.00218381	0.0438821	mmu-miR-874-3p	67.1603	160.155	-1.1385	0.0024216	0.042104	NM_007802.4	13038	Ctsk	transcript	3.1683	1.31973	1.26347	0.000832761	0.0278144
TCONS_00023682	12558	Cdh2	lncRNA	5.50214	3.05558	0.848547	0.00218381	0.0438821	mmu-miR-874-3p	67.1603	160.155	-1.1385	0.0024216	0.042104	TCONS_00002486	68295	Aar2	transcript	1.18122	0	Inf	0.000820671	0.0276354
TCONS_00023682	12558	Cdh2	lncRNA	5.50214	3.05558	0.848547	0.00218381	0.0438821	mmu-miR-874-3p	67.1603	160.155	-1.1385	0.0024216	0.042104	NM_001024606.2	382051	Pdp2	transcript	3.49019	6.43953	-0.883649	0.00130674	0.0342571
TCONS_00023682	12558	Cdh2	lncRNA	5.50214	3.05558	0.848547	0.00218381	0.0438821	mmu-miR-874-3p	67.1603	160.155	-1.1385	0.0024216	0.042104	NM_001288613.1	245860	Atg9a	transcript	2.10893	0.14069	3.90593	0.000401703	0.0276354
TCONS_00023682	12558	Cdh2	lncRNA	5.50214	3.05558	0.848547	0.00218381	0.0438821	mmu-miR-874-3p	67.1603	160.155	-1.1385	0.0024216	0.042104	XM_017317778.3	100502841	Epg5	transcript	0.826306	0.00611767	7.07755	0.000717464	0.0276354
TCONS_00023682	12558	Cdh2	lncRNA	5.50214	3.05558	0.848547	0.00218381	0.0438821	mmu-miR-874-3p	67.1603	160.155	-1.1385	0.0024216	0.042104	NM_130449.2	140792	Colec12	transcript	3.99678	3.31964	0.26781	0.00250276	0.0477182
TCONS_00023682	12558	Cdh2	lncRNA	5.50214	3.05558	0.848547	0.00218381	0.0438821	mmu-miR-874-3p	67.1603	160.155	-1.1385	0.0024216	0.042104	NM_001362722.1	74103	Nebl	transcript	26.0163	0	Inf	2.74e-05	0.0155632
TCONS_00023682	12558	Cdh2	lncRNA	5.50214	3.05558	0.848547	0.00218381	0.0438821	mmu-miR-874-3p	67.1603	160.155	-1.1385	0.0024216	0.042104	NM_008664.2	17930	Myom2	transcript	424.854	190.825	1.15472	0.000145974	0.0276354
TCONS_00023682	12558	Cdh2	lncRNA	5.50214	3.05558	0.848547	0.00218381	0.0438821	mmu-miR-874-3p	67.1603	160.155	-1.1385	0.0024216	0.042104	NM_146243.2	66713	Actr2	transcript	29.0525	22.8911	0.343875	0.00149481	0.0362404
TCONS_00023682	12558	Cdh2	lncRNA	5.50214	3.05558	0.848547	0.00218381	0.0438821	mmu-miR-874-3p	67.1603	160.155	-1.1385	0.0024216	0.042104	XM_036157952.1	12908	Crat	transcript	3.05654	0	Inf	5.87e-05	0.0211184
TCONS_00023682	12558	Cdh2	lncRNA	5.50214	3.05558	0.848547	0.00218381	0.0438821	mmu-miR-874-3p	67.1603	160.155	-1.1385	0.0024216	0.042104	NM_026582.5	68151	Wls	transcript	7.4038	5.38228	0.460048	0.000248241	0.0276354
TCONS_00023682	12558	Cdh2	lncRNA	5.50214	3.05558	0.848547	0.00218381	0.0438821	mmu-miR-874-3p	67.1603	160.155	-1.1385	0.0024216	0.042104	NM_026524.4	68041	Mid1ip1	transcript	37.9267	30.3802	0.320079	0.000987289	0.0299274
TCONS_00023682	12558	Cdh2	lncRNA	5.50214	3.05558	0.848547	0.00218381	0.0438821	mmu-miR-874-3p	67.1603	160.155	-1.1385	0.0024216	0.042104	XM_006538665.4	192185	Nadk	transcript	0.972007	0.0104583	6.53824	0.00196035	0.0413468
TCONS_00023682	12558	Cdh2	lncRNA	5.50214	3.05558	0.848547	0.00218381	0.0438821	mmu-miR-874-3p	67.1603	160.155	-1.1385	0.0024216	0.042104	NM_008706.5	18104	Nqo1	transcript	44.8113	23.425	0.935811	0.000167384	0.0276354
TCONS_00023682	12558	Cdh2	lncRNA	5.50214	3.05558	0.848547	0.00218381	0.0438821	mmu-miR-874-3p	67.1603	160.155	-1.1385	0.0024216	0.042104	NM_025557.1	66425	Pcp4l1	transcript	16.3196	50.2128	-1.62145	0.000300043	0.0276354
TCONS_00023682	12558	Cdh2	lncRNA	5.50214	3.05558	0.848547	0.00218381	0.0438821	mmu-miR-874-3p	67.1603	160.155	-1.1385	0.0024216	0.042104	NM_175398.4	109050	Inka2	transcript	2.56575	7.08752	-1.4659	0.00255544	0.0482407
TCONS_00023682	12558	Cdh2	lncRNA	5.50214	3.05558	0.848547	0.00218381	0.0438821	mmu-miR-874-3p	67.1603	160.155	-1.1385	0.0024216	0.042104	NM_001081242.2	70549	Tln2	transcript	2.63951	0.0295667	6.48015	0.000371777	0.0276354
TCONS_00023682	12558	Cdh2	lncRNA	5.50214	3.05558	0.848547	0.00218381	0.0438821	mmu-miR-874-3p	67.1603	160.155	-1.1385	0.0024216	0.042104	XM_011239446.4	228026	Pdk1	transcript	3.2763	0	Inf	0.000820671	0.0276354
TCONS_00023682	12558	Cdh2	lncRNA	5.50214	3.05558	0.848547	0.00218381	0.0438821	mmu-miR-874-3p	67.1603	160.155	-1.1385	0.0024216	0.042104	NM_011293.2	20022	Polr2j	transcript	13.2814	15.4381	-0.217088	0.000690938	0.0276354
TCONS_00023682	12558	Cdh2	lncRNA	5.50214	3.05558	0.848547	0.00218381	0.0438821	mmu-miR-874-3p	67.1603	160.155	-1.1385	0.0024216	0.042104	TCONS_00021414	56637	Gsk3b	transcript	3.22604	0	Inf	0.000820671	0.0276354
TCONS_00023682	12558	Cdh2	lncRNA	5.50214	3.05558	0.848547	0.00218381	0.0438821	mmu-miR-874-3p	67.1603	160.155	-1.1385	0.0024216	0.042104	NM_026443.4	67900	Mtfp1	transcript	27.5971	35.7028	-0.37152	0.000338742	0.0276354
TCONS_00023682	12558	Cdh2	lncRNA	5.50214	3.05558	0.848547	0.00218381	0.0438821	mmu-miR-874-3p	67.1603	160.155	-1.1385	0.0024216	0.042104	NM_022891.3	65019	Rpl23	transcript	63.7671	68.7937	-0.109465	0.00161807	0.037419
TCONS_00023682	12558	Cdh2	lncRNA	5.50214	3.05558	0.848547	0.00218381	0.0438821	mmu-miR-874-3p	67.1603	160.155	-1.1385	0.0024216	0.042104	NM_026824.4	68730	Dus1l	transcript	0	3.13193	#NAME?	0.000987532	0.0299274
TCONS_00023682	12558	Cdh2	lncRNA	5.50214	3.05558	0.848547	0.00218381	0.0438821	mmu-miR-874-3p	67.1603	160.155	-1.1385	0.0024216	0.042104	NM_025600.2	66498	Dda1	transcript	5.91252	6.16339	-0.0599504	0.000969153	0.0297987
TCONS_00023682	12558	Cdh2	lncRNA	5.50214	3.05558	0.848547	0.00218381	0.0438821	mmu-miR-874-3p	67.1603	160.155	-1.1385	0.0024216	0.042104	XM_006503677.4	11518	Add1	transcript	1.28784	0.00563833	7.83547	0.000849239	0.028103
TCONS_00023682	12558	Cdh2	lncRNA	5.50214	3.05558	0.848547	0.00218381	0.0438821	mmu-miR-874-3p	67.1603	160.155	-1.1385	0.0024216	0.042104	NM_001013390.3	399548	Scn4b	transcript	2.15251	16.2847	-2.91942	0.00111032	0.0316263
TCONS_00023682	12558	Cdh2	lncRNA	5.50214	3.05558	0.848547	0.00218381	0.0438821	mmu-miR-874-3p	67.1603	160.155	-1.1385	0.0024216	0.042104	TCONS_00022043	20656	Sod2	transcript	6.07359	0.19545	4.95768	0.0002461	0.0276354
TCONS_00023682	12558	Cdh2	lncRNA	5.50214	3.05558	0.848547	0.00218381	0.0438821	mmu-miR-874-3p	67.1603	160.155	-1.1385	0.0024216	0.042104	XM_006515925.4	26932	Ppp2r5e	transcript	1.17794	0.258766	2.18654	0.000952025	0.0296311
TCONS_00023682	12558	Cdh2	lncRNA	5.50214	3.05558	0.848547	0.00218381	0.0438821	mmu-miR-874-3p	67.1603	160.155	-1.1385	0.0024216	0.042104	NM_009634.6	11564	Adsl	transcript	8.39214	7.60029	0.142984	0.000689457	0.0276354
TCONS_00023682	12558	Cdh2	lncRNA	5.50214	3.05558	0.848547	0.00218381	0.0438821	mmu-miR-874-3p	67.1603	160.155	-1.1385	0.0024216	0.042104	NM_177059.3	320027	Fstl4	transcript	2.66003	0	Inf	0.00041668	0.0276354
TCONS_00023682	12558	Cdh2	lncRNA	5.50214	3.05558	0.848547	0.00218381	0.0438821	mmu-miR-874-3p	67.1603	160.155	-1.1385	0.0024216	0.042104	NM_008681.2	17988	Ndrg1	transcript	13.4879	7.27813	0.890022	0.00249471	0.0476436
TCONS_00023682	12558	Cdh2	lncRNA	5.50214	3.05558	0.848547	0.00218381	0.0438821	mmu-miR-874-3p	67.1603	160.155	-1.1385	0.0024216	0.042104	NM_018743.4	102247	Gpat4	transcript	7.76624	6.97285	0.155467	0.00132739	0.0345061
TCONS_00023682	12558	Cdh2	lncRNA	5.50214	3.05558	0.848547	0.00218381	0.0438821	mmu-miR-874-3p	67.1603	160.155	-1.1385	0.0024216	0.042104	NM_133702.3	68979	Nol11	transcript	5.69427	3.78451	0.589407	0.00138039	0.0351828
TCONS_00023682	12558	Cdh2	lncRNA	5.50214	3.05558	0.848547	0.00218381	0.0438821	mmu-miR-874-3p	67.1603	160.155	-1.1385	0.0024216	0.042104	XM_030244718.2	78267	Klhdc8b	transcript	0.935272	0.0147827	5.98341	0.00120816	0.0332056
TCONS_00023682	12558	Cdh2	lncRNA	5.50214	3.05558	0.848547	0.00218381	0.0438821	mmu-miR-874-3p	67.1603	160.155	-1.1385	0.0024216	0.042104	NM_001113408.2	16825	Ldb1	transcript	7.39907	6.99442	0.0811388	9.29e-05	0.0264941
TCONS_00023682	12558	Cdh2	lncRNA	5.50214	3.05558	0.848547	0.00218381	0.0438821	mmu-miR-874-3p	67.1603	160.155	-1.1385	0.0024216	0.042104	NM_027113.2	69544	Wdr5b	transcript	2.3334	0.0822317	4.8266	0.00171747	0.0384046
TCONS_00023682	12558	Cdh2	lncRNA	5.50214	3.05558	0.848547	0.00218381	0.0438821	mmu-miR-874-3p	67.1603	160.155	-1.1385	0.0024216	0.042104	NM_009647.5	11639	Ak4	transcript	3.29582	0.0275303	6.90347	0.00015385	0.0276354
TCONS_00023682	12558	Cdh2	lncRNA	5.50214	3.05558	0.848547	0.00218381	0.0438821	mmu-miR-874-3p	67.1603	160.155	-1.1385	0.0024216	0.042104	XM_036165784.1	12321	Calu	transcript	10.5439	16.3948	-0.636826	0.00157708	0.0372453
TCONS_00023682	12558	Cdh2	lncRNA	5.50214	3.05558	0.848547	0.00218381	0.0438821	mmu-miR-874-3p	67.1603	160.155	-1.1385	0.0024216	0.042104	NM_019694.2	56384	Letm1	transcript	5.73717	11.2145	-0.966953	0.000238425	0.0276354
TCONS_00023682	12558	Cdh2	lncRNA	5.50214	3.05558	0.848547	0.00218381	0.0438821	mmu-miR-874-3p	67.1603	160.155	-1.1385	0.0024216	0.042104	NM_025828.3	66890	Lman2	transcript	13.183	13.5281	-0.0372866	0.00183952	0.0400109
TCONS_00023682	12558	Cdh2	lncRNA	5.50214	3.05558	0.848547	0.00218381	0.0438821	mmu-miR-874-3p	67.1603	160.155	-1.1385	0.0024216	0.042104	NM_009710.4	11870	Art1	transcript	35.968	53.38	-0.569584	0.000340564	0.0276354
TCONS_00023682	12558	Cdh2	lncRNA	5.50214	3.05558	0.848547	0.00218381	0.0438821	mmu-miR-874-3p	67.1603	160.155	-1.1385	0.0024216	0.042104	XM_036161439.1	14773	Grk5	transcript	3.29743	0	Inf	0.000145308	0.0276354
TCONS_00023682	12558	Cdh2	lncRNA	5.50214	3.05558	0.848547	0.00218381	0.0438821	mmu-miR-874-3p	67.1603	160.155	-1.1385	0.0024216	0.042104	XM_036161998.1	241694	Ralgapa2	transcript	4.94291	0.169671	4.86455	0.000222044	0.0276354
TCONS_00023682	12558	Cdh2	lncRNA	5.50214	3.05558	0.848547	0.00218381	0.0438821	mmu-miR-874-3p	67.1603	160.155	-1.1385	0.0024216	0.042104	NM_175236.5	76187	Adhfe1	transcript	5.22125	5.88058	-0.171562	0.00131045	0.0342571
TCONS_00023682	12558	Cdh2	lncRNA	5.50214	3.05558	0.848547	0.00218381	0.0438821	mmu-miR-874-3p	67.1603	160.155	-1.1385	0.0024216	0.042104	TCONS_00022742	30957	Mapk8ip3	transcript	0.033413	2.79614	-6.38688	0.000274522	0.0276354
TCONS_00023682	12558	Cdh2	lncRNA	5.50214	3.05558	0.848547	0.00218381	0.0438821	mmu-miR-874-3p	67.1603	160.155	-1.1385	0.0024216	0.042104	NM_001012477.2	20315	Cxcl12	transcript	8.72303	23.6765	-1.44055	0.000741939	0.0276354
TCONS_00023682	12558	Cdh2	lncRNA	5.50214	3.05558	0.848547	0.00218381	0.0438821	mmu-miR-874-3p	67.1603	160.155	-1.1385	0.0024216	0.042104	NM_024214.2	67952	Tomm20	transcript	10.2066	7.84903	0.378922	0.000773909	0.0276354
TCONS_00023682	12558	Cdh2	lncRNA	5.50214	3.05558	0.848547	0.00218381	0.0438821	mmu-miR-874-3p	67.1603	160.155	-1.1385	0.0024216	0.042104	XM_006518707.3	19056	Ppp3cb	transcript	0.007019	4.54103	-9.33754	0.00110514	0.0316263
TCONS_00023682	12558	Cdh2	lncRNA	5.50214	3.05558	0.848547	0.00218381	0.0438821	mmu-miR-874-3p	67.1603	160.155	-1.1385	0.0024216	0.042104	NM_025407.2	22273	Uqcrc1	transcript	305.19	377.485	-0.306711	0.000478795	0.0276354
TCONS_00023682	12558	Cdh2	lncRNA	5.50214	3.05558	0.848547	0.00218381	0.0438821	mmu-miR-874-3p	67.1603	160.155	-1.1385	0.0024216	0.042104	NM_001013024.2	72607	Usp13	transcript	43.9871	44.7173	-0.0237507	0.000631592	0.0276354
TCONS_00023682	12558	Cdh2	lncRNA	5.50214	3.05558	0.848547	0.00218381	0.0438821	mmu-miR-874-3p	67.1603	160.155	-1.1385	0.0024216	0.042104	TCONS_00014905	216161	Sbno2	transcript	4.64735	3.20414	0.536473	0.00139977	0.0352728
TCONS_00023682	12558	Cdh2	lncRNA	5.50214	3.05558	0.848547	0.00218381	0.0438821	mmu-miR-874-3p	67.1603	160.155	-1.1385	0.0024216	0.042104	NM_001115132.2	52683	Ncaph2	transcript	3.1926	0.540685	2.56187	0.00108613	0.0314517
TCONS_00023682	12558	Cdh2	lncRNA	5.50214	3.05558	0.848547	0.00218381	0.0438821	mmu-miR-874-3p	67.1603	160.155	-1.1385	0.0024216	0.042104	NM_008338.4	15980	Ifngr2	transcript	40.1831	60.2437	-0.584221	7.98e-05	0.0253471
TCONS_00023682	12558	Cdh2	lncRNA	5.50214	3.05558	0.848547	0.00218381	0.0438821	mmu-miR-874-3p	67.1603	160.155	-1.1385	0.0024216	0.042104	XM_036156491.1	20787	Srebf1	transcript	2.73364	0.07479	5.19183	7.86e-05	0.0253471
TCONS_00023682	12558	Cdh2	lncRNA	5.50214	3.05558	0.848547	0.00218381	0.0438821	mmu-miR-874-3p	67.1603	160.155	-1.1385	0.0024216	0.042104	NM_008688.3	18029	Nfic	transcript	4.59623	14.0914	-1.61629	0.00200236	0.0419257
TCONS_00023682	12558	Cdh2	lncRNA	5.50214	3.05558	0.848547	0.00218381	0.0438821	mmu-miR-874-3p	67.1603	160.155	-1.1385	0.0024216	0.042104	XM_036165926.1	18575	Pde1c	transcript	2.25441	0.005907	8.57611	0.000698786	0.0276354
TCONS_00023682	12558	Cdh2	lncRNA	5.50214	3.05558	0.848547	0.00218381	0.0438821	mmu-miR-874-3p	67.1603	160.155	-1.1385	0.0024216	0.042104	XM_006505459.3	12444	Ccnd2	transcript	3.84378	0.0527657	6.18678	0.000467463	0.0276354
TCONS_00023682	12558	Cdh2	lncRNA	5.50214	3.05558	0.848547	0.00218381	0.0438821	mmu-miR-874-3p	67.1603	160.155	-1.1385	0.0024216	0.042104	XM_036156605.1	217331	Unk	transcript	0.843465	0	Inf	0.000820671	0.0276354
TCONS_00023682	12558	Cdh2	lncRNA	5.50214	3.05558	0.848547	0.00218381	0.0438821	mmu-miR-874-3p	67.1603	160.155	-1.1385	0.0024216	0.042104	NM_001169577.1	22214	Ube2h	transcript	1.41218	0.0643033	4.45689	0.00189306	0.0407486
TCONS_00023682	12558	Cdh2	lncRNA	5.50214	3.05558	0.848547	0.00218381	0.0438821	mmu-miR-874-3p	67.1603	160.155	-1.1385	0.0024216	0.042104	NM_027727.3	69190	Dym	transcript	21.0629	19.308	0.125505	0.00123487	0.0335637
TCONS_00009217	72263	1700030F04Rik	lncRNA	1.30781	0	Inf	0.000820671	0.0276354	mmu-miR-874-3p	67.1603	160.155	-1.1385	0.0024216	0.042104	NM_054046.5	23854	Def8	transcript	8.18934	6.47494	0.33888	0.0016116	0.037419
TCONS_00009217	72263	1700030F04Rik	lncRNA	1.30781	0	Inf	0.000820671	0.0276354	mmu-miR-874-3p	67.1603	160.155	-1.1385	0.0024216	0.042104	XM_006534391.5	75580	Zbtb4	transcript	1.27003	0	Inf	0.000820671	0.0276354
TCONS_00009217	72263	1700030F04Rik	lncRNA	1.30781	0	Inf	0.000820671	0.0276354	mmu-miR-874-3p	67.1603	160.155	-1.1385	0.0024216	0.042104	NM_153080.3	216810	Tom1l2	transcript	1.13139	0.017205	6.03913	0.00117465	0.0326745
TCONS_00009217	72263	1700030F04Rik	lncRNA	1.30781	0	Inf	0.000820671	0.0276354	mmu-miR-874-3p	67.1603	160.155	-1.1385	0.0024216	0.042104	NM_011838.4	23936	Lynx1	transcript	25.7672	40.3626	-0.647487	0.000722116	0.0276354
TCONS_00009217	72263	1700030F04Rik	lncRNA	1.30781	0	Inf	0.000820671	0.0276354	mmu-miR-874-3p	67.1603	160.155	-1.1385	0.0024216	0.042104	NM_001098225.2	11496	Adam22	transcript	2.58778	0.00525567	8.94362	2.29e-06	0.0151166
TCONS_00009217	72263	1700030F04Rik	lncRNA	1.30781	0	Inf	0.000820671	0.0276354	mmu-miR-874-3p	67.1603	160.155	-1.1385	0.0024216	0.042104	XM_030253061.2	100273	Osbpl9	transcript	0.913933	0	Inf	0.000964603	0.0297987
TCONS_00009217	72263	1700030F04Rik	lncRNA	1.30781	0	Inf	0.000820671	0.0276354	mmu-miR-874-3p	67.1603	160.155	-1.1385	0.0024216	0.042104	TCONS_00020016	65246	Xpo7	transcript	4.13029	0.00722533	9.15896	0.00116536	0.0326432
TCONS_00009217	72263	1700030F04Rik	lncRNA	1.30781	0	Inf	0.000820671	0.0276354	mmu-miR-874-3p	67.1603	160.155	-1.1385	0.0024216	0.042104	TCONS_00023739	76594	Dnajc18	transcript	1.93372	0	Inf	0.000820671	0.0276354
TCONS_00009217	72263	1700030F04Rik	lncRNA	1.30781	0	Inf	0.000820671	0.0276354	mmu-miR-874-3p	67.1603	160.155	-1.1385	0.0024216	0.042104	TCONS_00006799	68303	Fam114a1	transcript	0.995193	0	Inf	0.000820671	0.0276354
TCONS_00009217	72263	1700030F04Rik	lncRNA	1.30781	0	Inf	0.000820671	0.0276354	mmu-miR-874-3p	67.1603	160.155	-1.1385	0.0024216	0.042104	NM_172925.2	244923	Klhl31	transcript	25.7365	28.473	-0.145783	0.00102428	0.0304533
TCONS_00009217	72263	1700030F04Rik	lncRNA	1.30781	0	Inf	0.000820671	0.0276354	mmu-miR-874-3p	67.1603	160.155	-1.1385	0.0024216	0.042104	NM_001347446.1	94089	Trim7	transcript	1.16147	7.15854	-2.62371	0.00045152	0.0276354
TCONS_00009217	72263	1700030F04Rik	lncRNA	1.30781	0	Inf	0.000820671	0.0276354	mmu-miR-874-3p	67.1603	160.155	-1.1385	0.0024216	0.042104	NM_009818.1	12385	Ctnna1	transcript	89.2245	90.2244	-0.0160775	0.000857497	0.0281337
TCONS_00009217	72263	1700030F04Rik	lncRNA	1.30781	0	Inf	0.000820671	0.0276354	mmu-miR-874-3p	67.1603	160.155	-1.1385	0.0024216	0.042104	NM_001355755.1	17896	Myl4	transcript	9.13829	0.191058	5.57984	0.00178945	0.0391774
TCONS_00009217	72263	1700030F04Rik	lncRNA	1.30781	0	Inf	0.000820671	0.0276354	mmu-miR-874-3p	67.1603	160.155	-1.1385	0.0024216	0.042104	XM_036154088.1	319518	Pdpr	transcript	1.61977	3.72043	-1.19968	0.000122455	0.0276354
TCONS_00009217	72263	1700030F04Rik	lncRNA	1.30781	0	Inf	0.000820671	0.0276354	mmu-miR-874-3p	67.1603	160.155	-1.1385	0.0024216	0.042104	XM_030246370.1	72729	Cdc42se2	transcript	1.75393	0.133176	3.71919	3e-05	0.0155632
TCONS_00009217	72263	1700030F04Rik	lncRNA	1.30781	0	Inf	0.000820671	0.0276354	mmu-miR-874-3p	67.1603	160.155	-1.1385	0.0024216	0.042104	NM_016709.2	11992	Auh	transcript	23.1108	25.9264	-0.165855	0.00124159	0.0335637
TCONS_00009217	72263	1700030F04Rik	lncRNA	1.30781	0	Inf	0.000820671	0.0276354	mmu-miR-874-3p	67.1603	160.155	-1.1385	0.0024216	0.042104	TCONS_00022612	225049	Ttc7	transcript	1.28356	2.38495	-0.893809	1.15e-05	0.0155632
TCONS_00009217	72263	1700030F04Rik	lncRNA	1.30781	0	Inf	0.000820671	0.0276354	mmu-miR-874-3p	67.1603	160.155	-1.1385	0.0024216	0.042104	XM_006517134.5	18193	Nsd1	transcript	1.9852	0.448937	2.1447	0.00060106	0.0276354
TCONS_00009217	72263	1700030F04Rik	lncRNA	1.30781	0	Inf	0.000820671	0.0276354	mmu-miR-874-3p	67.1603	160.155	-1.1385	0.0024216	0.042104	TCONS_00001035	21961	Tns1	transcript	39.6786	2.46049	4.01134	0.00031257	0.0276354
TCONS_00009217	72263	1700030F04Rik	lncRNA	1.30781	0	Inf	0.000820671	0.0276354	mmu-miR-874-3p	67.1603	160.155	-1.1385	0.0024216	0.042104	NM_011207.2	545622	Ptpn3	transcript	2.85143	0.047324	5.91297	0.000765875	0.0276354
TCONS_00009217	72263	1700030F04Rik	lncRNA	1.30781	0	Inf	0.000820671	0.0276354	mmu-miR-874-3p	67.1603	160.155	-1.1385	0.0024216	0.042104	XM_030255147.2	381290	Atp2b4	transcript	1.79149	0	Inf	0.000233871	0.0276354
TCONS_00009217	72263	1700030F04Rik	lncRNA	1.30781	0	Inf	0.000820671	0.0276354	mmu-miR-874-3p	67.1603	160.155	-1.1385	0.0024216	0.042104	TCONS_00017675	68519	Eml1	transcript	11.0496	10.9045	0.0190772	0.00239943	0.0465183
TCONS_00009217	72263	1700030F04Rik	lncRNA	1.30781	0	Inf	0.000820671	0.0276354	mmu-miR-874-3p	67.1603	160.155	-1.1385	0.0024216	0.042104	NM_177411.4	19344	Rab5b	transcript	15.3906	17.862	-0.214852	0.000321654	0.0276354
TCONS_00009217	72263	1700030F04Rik	lncRNA	1.30781	0	Inf	0.000820671	0.0276354	mmu-miR-874-3p	67.1603	160.155	-1.1385	0.0024216	0.042104	NM_023317.2	67203	Nde1	transcript	1.95862	4.78075	-1.2874	2.29e-05	0.0155632
TCONS_00009217	72263	1700030F04Rik	lncRNA	1.30781	0	Inf	0.000820671	0.0276354	mmu-miR-874-3p	67.1603	160.155	-1.1385	0.0024216	0.042104	NM_025829.4	66892	Eif4e3	transcript	8.06038	15.9332	-0.98312	2.78e-05	0.0155632
TCONS_00009217	72263	1700030F04Rik	lncRNA	1.30781	0	Inf	0.000820671	0.0276354	mmu-miR-874-3p	67.1603	160.155	-1.1385	0.0024216	0.042104	NM_173866.4	108682	Gpt2	transcript	1.46859	5.47079	-1.89731	0.000818569	0.0276354
TCONS_00009217	72263	1700030F04Rik	lncRNA	1.30781	0	Inf	0.000820671	0.0276354	mmu-miR-874-3p	67.1603	160.155	-1.1385	0.0024216	0.042104	XM_006524674.5	56468	Socs5	transcript	2.99592	0.0603897	5.63255	0.000527102	0.0276354
TCONS_00009217	72263	1700030F04Rik	lncRNA	1.30781	0	Inf	0.000820671	0.0276354	mmu-miR-874-3p	67.1603	160.155	-1.1385	0.0024216	0.042104	XM_006517452.5	76577	Faf2	transcript	0.845375	0	Inf	0.000820671	0.0276354
TCONS_00009217	72263	1700030F04Rik	lncRNA	1.30781	0	Inf	0.000820671	0.0276354	mmu-miR-874-3p	67.1603	160.155	-1.1385	0.0024216	0.042104	NM_145605.2	234825	Klhdc4	transcript	1.15389	3.19303	-1.46842	0.000484263	0.0276354
TCONS_00009217	72263	1700030F04Rik	lncRNA	1.30781	0	Inf	0.000820671	0.0276354	mmu-miR-874-3p	67.1603	160.155	-1.1385	0.0024216	0.042104	NM_177322.3	11607	Agtr1a	transcript	16.509	9.02107	0.871884	1.52e-05	0.0155632
TCONS_00009217	72263	1700030F04Rik	lncRNA	1.30781	0	Inf	0.000820671	0.0276354	mmu-miR-874-3p	67.1603	160.155	-1.1385	0.0024216	0.042104	NM_007802.4	13038	Ctsk	transcript	3.1683	1.31973	1.26347	0.000832761	0.0278144
TCONS_00009217	72263	1700030F04Rik	lncRNA	1.30781	0	Inf	0.000820671	0.0276354	mmu-miR-874-3p	67.1603	160.155	-1.1385	0.0024216	0.042104	TCONS_00002486	68295	Aar2	transcript	1.18122	0	Inf	0.000820671	0.0276354
TCONS_00009217	72263	1700030F04Rik	lncRNA	1.30781	0	Inf	0.000820671	0.0276354	mmu-miR-874-3p	67.1603	160.155	-1.1385	0.0024216	0.042104	NM_001024606.2	382051	Pdp2	transcript	3.49019	6.43953	-0.883649	0.00130674	0.0342571
TCONS_00009217	72263	1700030F04Rik	lncRNA	1.30781	0	Inf	0.000820671	0.0276354	mmu-miR-874-3p	67.1603	160.155	-1.1385	0.0024216	0.042104	NM_001288613.1	245860	Atg9a	transcript	2.10893	0.14069	3.90593	0.000401703	0.0276354
TCONS_00009217	72263	1700030F04Rik	lncRNA	1.30781	0	Inf	0.000820671	0.0276354	mmu-miR-874-3p	67.1603	160.155	-1.1385	0.0024216	0.042104	XM_017317778.3	100502841	Epg5	transcript	0.826306	0.00611767	7.07755	0.000717464	0.0276354
TCONS_00009217	72263	1700030F04Rik	lncRNA	1.30781	0	Inf	0.000820671	0.0276354	mmu-miR-874-3p	67.1603	160.155	-1.1385	0.0024216	0.042104	NM_130449.2	140792	Colec12	transcript	3.99678	3.31964	0.26781	0.00250276	0.0477182
TCONS_00009217	72263	1700030F04Rik	lncRNA	1.30781	0	Inf	0.000820671	0.0276354	mmu-miR-874-3p	67.1603	160.155	-1.1385	0.0024216	0.042104	NM_001362722.1	74103	Nebl	transcript	26.0163	0	Inf	2.74e-05	0.0155632
TCONS_00009217	72263	1700030F04Rik	lncRNA	1.30781	0	Inf	0.000820671	0.0276354	mmu-miR-874-3p	67.1603	160.155	-1.1385	0.0024216	0.042104	NM_008664.2	17930	Myom2	transcript	424.854	190.825	1.15472	0.000145974	0.0276354
TCONS_00009217	72263	1700030F04Rik	lncRNA	1.30781	0	Inf	0.000820671	0.0276354	mmu-miR-874-3p	67.1603	160.155	-1.1385	0.0024216	0.042104	NM_146243.2	66713	Actr2	transcript	29.0525	22.8911	0.343875	0.00149481	0.0362404
TCONS_00009217	72263	1700030F04Rik	lncRNA	1.30781	0	Inf	0.000820671	0.0276354	mmu-miR-874-3p	67.1603	160.155	-1.1385	0.0024216	0.042104	XM_036157952.1	12908	Crat	transcript	3.05654	0	Inf	5.87e-05	0.0211184
TCONS_00009217	72263	1700030F04Rik	lncRNA	1.30781	0	Inf	0.000820671	0.0276354	mmu-miR-874-3p	67.1603	160.155	-1.1385	0.0024216	0.042104	NM_026582.5	68151	Wls	transcript	7.4038	5.38228	0.460048	0.000248241	0.0276354
TCONS_00009217	72263	1700030F04Rik	lncRNA	1.30781	0	Inf	0.000820671	0.0276354	mmu-miR-874-3p	67.1603	160.155	-1.1385	0.0024216	0.042104	NM_026524.4	68041	Mid1ip1	transcript	37.9267	30.3802	0.320079	0.000987289	0.0299274
TCONS_00009217	72263	1700030F04Rik	lncRNA	1.30781	0	Inf	0.000820671	0.0276354	mmu-miR-874-3p	67.1603	160.155	-1.1385	0.0024216	0.042104	XM_006538665.4	192185	Nadk	transcript	0.972007	0.0104583	6.53824	0.00196035	0.0413468
TCONS_00009217	72263	1700030F04Rik	lncRNA	1.30781	0	Inf	0.000820671	0.0276354	mmu-miR-874-3p	67.1603	160.155	-1.1385	0.0024216	0.042104	NM_008706.5	18104	Nqo1	transcript	44.8113	23.425	0.935811	0.000167384	0.0276354
TCONS_00009217	72263	1700030F04Rik	lncRNA	1.30781	0	Inf	0.000820671	0.0276354	mmu-miR-874-3p	67.1603	160.155	-1.1385	0.0024216	0.042104	NM_025557.1	66425	Pcp4l1	transcript	16.3196	50.2128	-1.62145	0.000300043	0.0276354
TCONS_00009217	72263	1700030F04Rik	lncRNA	1.30781	0	Inf	0.000820671	0.0276354	mmu-miR-874-3p	67.1603	160.155	-1.1385	0.0024216	0.042104	NM_175398.4	109050	Inka2	transcript	2.56575	7.08752	-1.4659	0.00255544	0.0482407
TCONS_00009217	72263	1700030F04Rik	lncRNA	1.30781	0	Inf	0.000820671	0.0276354	mmu-miR-874-3p	67.1603	160.155	-1.1385	0.0024216	0.042104	NM_001081242.2	70549	Tln2	transcript	2.63951	0.0295667	6.48015	0.000371777	0.0276354
TCONS_00009217	72263	1700030F04Rik	lncRNA	1.30781	0	Inf	0.000820671	0.0276354	mmu-miR-874-3p	67.1603	160.155	-1.1385	0.0024216	0.042104	XM_011239446.4	228026	Pdk1	transcript	3.2763	0	Inf	0.000820671	0.0276354
TCONS_00009217	72263	1700030F04Rik	lncRNA	1.30781	0	Inf	0.000820671	0.0276354	mmu-miR-874-3p	67.1603	160.155	-1.1385	0.0024216	0.042104	NM_011293.2	20022	Polr2j	transcript	13.2814	15.4381	-0.217088	0.000690938	0.0276354
TCONS_00009217	72263	1700030F04Rik	lncRNA	1.30781	0	Inf	0.000820671	0.0276354	mmu-miR-874-3p	67.1603	160.155	-1.1385	0.0024216	0.042104	TCONS_00021414	56637	Gsk3b	transcript	3.22604	0	Inf	0.000820671	0.0276354
TCONS_00009217	72263	1700030F04Rik	lncRNA	1.30781	0	Inf	0.000820671	0.0276354	mmu-miR-874-3p	67.1603	160.155	-1.1385	0.0024216	0.042104	NM_026443.4	67900	Mtfp1	transcript	27.5971	35.7028	-0.37152	0.000338742	0.0276354
TCONS_00009217	72263	1700030F04Rik	lncRNA	1.30781	0	Inf	0.000820671	0.0276354	mmu-miR-874-3p	67.1603	160.155	-1.1385	0.0024216	0.042104	NM_022891.3	65019	Rpl23	transcript	63.7671	68.7937	-0.109465	0.00161807	0.037419
TCONS_00009217	72263	1700030F04Rik	lncRNA	1.30781	0	Inf	0.000820671	0.0276354	mmu-miR-874-3p	67.1603	160.155	-1.1385	0.0024216	0.042104	NM_026824.4	68730	Dus1l	transcript	0	3.13193	#NAME?	0.000987532	0.0299274
TCONS_00009217	72263	1700030F04Rik	lncRNA	1.30781	0	Inf	0.000820671	0.0276354	mmu-miR-874-3p	67.1603	160.155	-1.1385	0.0024216	0.042104	NM_025600.2	66498	Dda1	transcript	5.91252	6.16339	-0.0599504	0.000969153	0.0297987
TCONS_00009217	72263	1700030F04Rik	lncRNA	1.30781	0	Inf	0.000820671	0.0276354	mmu-miR-874-3p	67.1603	160.155	-1.1385	0.0024216	0.042104	XM_006503677.4	11518	Add1	transcript	1.28784	0.00563833	7.83547	0.000849239	0.028103
TCONS_00009217	72263	1700030F04Rik	lncRNA	1.30781	0	Inf	0.000820671	0.0276354	mmu-miR-874-3p	67.1603	160.155	-1.1385	0.0024216	0.042104	NM_001013390.3	399548	Scn4b	transcript	2.15251	16.2847	-2.91942	0.00111032	0.0316263
TCONS_00009217	72263	1700030F04Rik	lncRNA	1.30781	0	Inf	0.000820671	0.0276354	mmu-miR-874-3p	67.1603	160.155	-1.1385	0.0024216	0.042104	TCONS_00022043	20656	Sod2	transcript	6.07359	0.19545	4.95768	0.0002461	0.0276354
TCONS_00009217	72263	1700030F04Rik	lncRNA	1.30781	0	Inf	0.000820671	0.0276354	mmu-miR-874-3p	67.1603	160.155	-1.1385	0.0024216	0.042104	XM_006515925.4	26932	Ppp2r5e	transcript	1.17794	0.258766	2.18654	0.000952025	0.0296311
TCONS_00009217	72263	1700030F04Rik	lncRNA	1.30781	0	Inf	0.000820671	0.0276354	mmu-miR-874-3p	67.1603	160.155	-1.1385	0.0024216	0.042104	NM_009634.6	11564	Adsl	transcript	8.39214	7.60029	0.142984	0.000689457	0.0276354
TCONS_00009217	72263	1700030F04Rik	lncRNA	1.30781	0	Inf	0.000820671	0.0276354	mmu-miR-874-3p	67.1603	160.155	-1.1385	0.0024216	0.042104	NM_177059.3	320027	Fstl4	transcript	2.66003	0	Inf	0.00041668	0.0276354
TCONS_00009217	72263	1700030F04Rik	lncRNA	1.30781	0	Inf	0.000820671	0.0276354	mmu-miR-874-3p	67.1603	160.155	-1.1385	0.0024216	0.042104	NM_008681.2	17988	Ndrg1	transcript	13.4879	7.27813	0.890022	0.00249471	0.0476436
TCONS_00009217	72263	1700030F04Rik	lncRNA	1.30781	0	Inf	0.000820671	0.0276354	mmu-miR-874-3p	67.1603	160.155	-1.1385	0.0024216	0.042104	NM_018743.4	102247	Gpat4	transcript	7.76624	6.97285	0.155467	0.00132739	0.0345061
TCONS_00009217	72263	1700030F04Rik	lncRNA	1.30781	0	Inf	0.000820671	0.0276354	mmu-miR-874-3p	67.1603	160.155	-1.1385	0.0024216	0.042104	NM_133702.3	68979	Nol11	transcript	5.69427	3.78451	0.589407	0.00138039	0.0351828
TCONS_00009217	72263	1700030F04Rik	lncRNA	1.30781	0	Inf	0.000820671	0.0276354	mmu-miR-874-3p	67.1603	160.155	-1.1385	0.0024216	0.042104	XM_030244718.2	78267	Klhdc8b	transcript	0.935272	0.0147827	5.98341	0.00120816	0.0332056
TCONS_00009217	72263	1700030F04Rik	lncRNA	1.30781	0	Inf	0.000820671	0.0276354	mmu-miR-874-3p	67.1603	160.155	-1.1385	0.0024216	0.042104	NM_001113408.2	16825	Ldb1	transcript	7.39907	6.99442	0.0811388	9.29e-05	0.0264941
TCONS_00009217	72263	1700030F04Rik	lncRNA	1.30781	0	Inf	0.000820671	0.0276354	mmu-miR-874-3p	67.1603	160.155	-1.1385	0.0024216	0.042104	NM_027113.2	69544	Wdr5b	transcript	2.3334	0.0822317	4.8266	0.00171747	0.0384046
TCONS_00009217	72263	1700030F04Rik	lncRNA	1.30781	0	Inf	0.000820671	0.0276354	mmu-miR-874-3p	67.1603	160.155	-1.1385	0.0024216	0.042104	NM_009647.5	11639	Ak4	transcript	3.29582	0.0275303	6.90347	0.00015385	0.0276354
TCONS_00009217	72263	1700030F04Rik	lncRNA	1.30781	0	Inf	0.000820671	0.0276354	mmu-miR-874-3p	67.1603	160.155	-1.1385	0.0024216	0.042104	XM_036165784.1	12321	Calu	transcript	10.5439	16.3948	-0.636826	0.00157708	0.0372453
TCONS_00009217	72263	1700030F04Rik	lncRNA	1.30781	0	Inf	0.000820671	0.0276354	mmu-miR-874-3p	67.1603	160.155	-1.1385	0.0024216	0.042104	NM_019694.2	56384	Letm1	transcript	5.73717	11.2145	-0.966953	0.000238425	0.0276354
TCONS_00009217	72263	1700030F04Rik	lncRNA	1.30781	0	Inf	0.000820671	0.0276354	mmu-miR-874-3p	67.1603	160.155	-1.1385	0.0024216	0.042104	NM_025828.3	66890	Lman2	transcript	13.183	13.5281	-0.0372866	0.00183952	0.0400109
TCONS_00009217	72263	1700030F04Rik	lncRNA	1.30781	0	Inf	0.000820671	0.0276354	mmu-miR-874-3p	67.1603	160.155	-1.1385	0.0024216	0.042104	NM_009710.4	11870	Art1	transcript	35.968	53.38	-0.569584	0.000340564	0.0276354
TCONS_00009217	72263	1700030F04Rik	lncRNA	1.30781	0	Inf	0.000820671	0.0276354	mmu-miR-874-3p	67.1603	160.155	-1.1385	0.0024216	0.042104	XM_036161439.1	14773	Grk5	transcript	3.29743	0	Inf	0.000145308	0.0276354
TCONS_00009217	72263	1700030F04Rik	lncRNA	1.30781	0	Inf	0.000820671	0.0276354	mmu-miR-874-3p	67.1603	160.155	-1.1385	0.0024216	0.042104	XM_036161998.1	241694	Ralgapa2	transcript	4.94291	0.169671	4.86455	0.000222044	0.0276354
TCONS_00009217	72263	1700030F04Rik	lncRNA	1.30781	0	Inf	0.000820671	0.0276354	mmu-miR-874-3p	67.1603	160.155	-1.1385	0.0024216	0.042104	NM_175236.5	76187	Adhfe1	transcript	5.22125	5.88058	-0.171562	0.00131045	0.0342571
TCONS_00009217	72263	1700030F04Rik	lncRNA	1.30781	0	Inf	0.000820671	0.0276354	mmu-miR-874-3p	67.1603	160.155	-1.1385	0.0024216	0.042104	TCONS_00022742	30957	Mapk8ip3	transcript	0.033413	2.79614	-6.38688	0.000274522	0.0276354
TCONS_00009217	72263	1700030F04Rik	lncRNA	1.30781	0	Inf	0.000820671	0.0276354	mmu-miR-874-3p	67.1603	160.155	-1.1385	0.0024216	0.042104	NM_001012477.2	20315	Cxcl12	transcript	8.72303	23.6765	-1.44055	0.000741939	0.0276354
TCONS_00009217	72263	1700030F04Rik	lncRNA	1.30781	0	Inf	0.000820671	0.0276354	mmu-miR-874-3p	67.1603	160.155	-1.1385	0.0024216	0.042104	NM_024214.2	67952	Tomm20	transcript	10.2066	7.84903	0.378922	0.000773909	0.0276354
TCONS_00009217	72263	1700030F04Rik	lncRNA	1.30781	0	Inf	0.000820671	0.0276354	mmu-miR-874-3p	67.1603	160.155	-1.1385	0.0024216	0.042104	XM_006518707.3	19056	Ppp3cb	transcript	0.007019	4.54103	-9.33754	0.00110514	0.0316263
TCONS_00009217	72263	1700030F04Rik	lncRNA	1.30781	0	Inf	0.000820671	0.0276354	mmu-miR-874-3p	67.1603	160.155	-1.1385	0.0024216	0.042104	NM_025407.2	22273	Uqcrc1	transcript	305.19	377.485	-0.306711	0.000478795	0.0276354
TCONS_00009217	72263	1700030F04Rik	lncRNA	1.30781	0	Inf	0.000820671	0.0276354	mmu-miR-874-3p	67.1603	160.155	-1.1385	0.0024216	0.042104	NM_001013024.2	72607	Usp13	transcript	43.9871	44.7173	-0.0237507	0.000631592	0.0276354
TCONS_00009217	72263	1700030F04Rik	lncRNA	1.30781	0	Inf	0.000820671	0.0276354	mmu-miR-874-3p	67.1603	160.155	-1.1385	0.0024216	0.042104	TCONS_00014905	216161	Sbno2	transcript	4.64735	3.20414	0.536473	0.00139977	0.0352728
TCONS_00009217	72263	1700030F04Rik	lncRNA	1.30781	0	Inf	0.000820671	0.0276354	mmu-miR-874-3p	67.1603	160.155	-1.1385	0.0024216	0.042104	NM_001115132.2	52683	Ncaph2	transcript	3.1926	0.540685	2.56187	0.00108613	0.0314517
TCONS_00009217	72263	1700030F04Rik	lncRNA	1.30781	0	Inf	0.000820671	0.0276354	mmu-miR-874-3p	67.1603	160.155	-1.1385	0.0024216	0.042104	NM_008338.4	15980	Ifngr2	transcript	40.1831	60.2437	-0.584221	7.98e-05	0.0253471
TCONS_00009217	72263	1700030F04Rik	lncRNA	1.30781	0	Inf	0.000820671	0.0276354	mmu-miR-874-3p	67.1603	160.155	-1.1385	0.0024216	0.042104	XM_036156491.1	20787	Srebf1	transcript	2.73364	0.07479	5.19183	7.86e-05	0.0253471
TCONS_00009217	72263	1700030F04Rik	lncRNA	1.30781	0	Inf	0.000820671	0.0276354	mmu-miR-874-3p	67.1603	160.155	-1.1385	0.0024216	0.042104	NM_008688.3	18029	Nfic	transcript	4.59623	14.0914	-1.61629	0.00200236	0.0419257
TCONS_00009217	72263	1700030F04Rik	lncRNA	1.30781	0	Inf	0.000820671	0.0276354	mmu-miR-874-3p	67.1603	160.155	-1.1385	0.0024216	0.042104	XM_036165926.1	18575	Pde1c	transcript	2.25441	0.005907	8.57611	0.000698786	0.0276354
TCONS_00009217	72263	1700030F04Rik	lncRNA	1.30781	0	Inf	0.000820671	0.0276354	mmu-miR-874-3p	67.1603	160.155	-1.1385	0.0024216	0.042104	XM_006505459.3	12444	Ccnd2	transcript	3.84378	0.0527657	6.18678	0.000467463	0.0276354
TCONS_00009217	72263	1700030F04Rik	lncRNA	1.30781	0	Inf	0.000820671	0.0276354	mmu-miR-874-3p	67.1603	160.155	-1.1385	0.0024216	0.042104	XM_036156605.1	217331	Unk	transcript	0.843465	0	Inf	0.000820671	0.0276354
TCONS_00009217	72263	1700030F04Rik	lncRNA	1.30781	0	Inf	0.000820671	0.0276354	mmu-miR-874-3p	67.1603	160.155	-1.1385	0.0024216	0.042104	NM_001169577.1	22214	Ube2h	transcript	1.41218	0.0643033	4.45689	0.00189306	0.0407486
TCONS_00009217	72263	1700030F04Rik	lncRNA	1.30781	0	Inf	0.000820671	0.0276354	mmu-miR-874-3p	67.1603	160.155	-1.1385	0.0024216	0.042104	NM_027727.3	69190	Dym	transcript	21.0629	19.308	0.125505	0.00123487	0.0335637
TCONS_00022949	118568312	LOC118568312	lncRNA	27.2217	0	Inf	0.000820671	0.0276354	mmu-miR-874-3p	67.1603	160.155	-1.1385	0.0024216	0.042104	NM_054046.5	23854	Def8	transcript	8.18934	6.47494	0.33888	0.0016116	0.037419
TCONS_00022949	118568312	LOC118568312	lncRNA	27.2217	0	Inf	0.000820671	0.0276354	mmu-miR-874-3p	67.1603	160.155	-1.1385	0.0024216	0.042104	XM_006534391.5	75580	Zbtb4	transcript	1.27003	0	Inf	0.000820671	0.0276354
TCONS_00022949	118568312	LOC118568312	lncRNA	27.2217	0	Inf	0.000820671	0.0276354	mmu-miR-874-3p	67.1603	160.155	-1.1385	0.0024216	0.042104	NM_153080.3	216810	Tom1l2	transcript	1.13139	0.017205	6.03913	0.00117465	0.0326745
TCONS_00022949	118568312	LOC118568312	lncRNA	27.2217	0	Inf	0.000820671	0.0276354	mmu-miR-874-3p	67.1603	160.155	-1.1385	0.0024216	0.042104	NM_011838.4	23936	Lynx1	transcript	25.7672	40.3626	-0.647487	0.000722116	0.0276354
TCONS_00022949	118568312	LOC118568312	lncRNA	27.2217	0	Inf	0.000820671	0.0276354	mmu-miR-874-3p	67.1603	160.155	-1.1385	0.0024216	0.042104	NM_001098225.2	11496	Adam22	transcript	2.58778	0.00525567	8.94362	2.29e-06	0.0151166
TCONS_00022949	118568312	LOC118568312	lncRNA	27.2217	0	Inf	0.000820671	0.0276354	mmu-miR-874-3p	67.1603	160.155	-1.1385	0.0024216	0.042104	XM_030253061.2	100273	Osbpl9	transcript	0.913933	0	Inf	0.000964603	0.0297987
TCONS_00022949	118568312	LOC118568312	lncRNA	27.2217	0	Inf	0.000820671	0.0276354	mmu-miR-874-3p	67.1603	160.155	-1.1385	0.0024216	0.042104	TCONS_00020016	65246	Xpo7	transcript	4.13029	0.00722533	9.15896	0.00116536	0.0326432
TCONS_00022949	118568312	LOC118568312	lncRNA	27.2217	0	Inf	0.000820671	0.0276354	mmu-miR-874-3p	67.1603	160.155	-1.1385	0.0024216	0.042104	TCONS_00023739	76594	Dnajc18	transcript	1.93372	0	Inf	0.000820671	0.0276354
TCONS_00022949	118568312	LOC118568312	lncRNA	27.2217	0	Inf	0.000820671	0.0276354	mmu-miR-874-3p	67.1603	160.155	-1.1385	0.0024216	0.042104	TCONS_00006799	68303	Fam114a1	transcript	0.995193	0	Inf	0.000820671	0.0276354
TCONS_00022949	118568312	LOC118568312	lncRNA	27.2217	0	Inf	0.000820671	0.0276354	mmu-miR-874-3p	67.1603	160.155	-1.1385	0.0024216	0.042104	NM_172925.2	244923	Klhl31	transcript	25.7365	28.473	-0.145783	0.00102428	0.0304533
TCONS_00022949	118568312	LOC118568312	lncRNA	27.2217	0	Inf	0.000820671	0.0276354	mmu-miR-874-3p	67.1603	160.155	-1.1385	0.0024216	0.042104	NM_001347446.1	94089	Trim7	transcript	1.16147	7.15854	-2.62371	0.00045152	0.0276354
TCONS_00022949	118568312	LOC118568312	lncRNA	27.2217	0	Inf	0.000820671	0.0276354	mmu-miR-874-3p	67.1603	160.155	-1.1385	0.0024216	0.042104	NM_009818.1	12385	Ctnna1	transcript	89.2245	90.2244	-0.0160775	0.000857497	0.0281337
TCONS_00022949	118568312	LOC118568312	lncRNA	27.2217	0	Inf	0.000820671	0.0276354	mmu-miR-874-3p	67.1603	160.155	-1.1385	0.0024216	0.042104	NM_001355755.1	17896	Myl4	transcript	9.13829	0.191058	5.57984	0.00178945	0.0391774
TCONS_00022949	118568312	LOC118568312	lncRNA	27.2217	0	Inf	0.000820671	0.0276354	mmu-miR-874-3p	67.1603	160.155	-1.1385	0.0024216	0.042104	XM_036154088.1	319518	Pdpr	transcript	1.61977	3.72043	-1.19968	0.000122455	0.0276354
TCONS_00022949	118568312	LOC118568312	lncRNA	27.2217	0	Inf	0.000820671	0.0276354	mmu-miR-874-3p	67.1603	160.155	-1.1385	0.0024216	0.042104	XM_030246370.1	72729	Cdc42se2	transcript	1.75393	0.133176	3.71919	3e-05	0.0155632
TCONS_00022949	118568312	LOC118568312	lncRNA	27.2217	0	Inf	0.000820671	0.0276354	mmu-miR-874-3p	67.1603	160.155	-1.1385	0.0024216	0.042104	NM_016709.2	11992	Auh	transcript	23.1108	25.9264	-0.165855	0.00124159	0.0335637
TCONS_00022949	118568312	LOC118568312	lncRNA	27.2217	0	Inf	0.000820671	0.0276354	mmu-miR-874-3p	67.1603	160.155	-1.1385	0.0024216	0.042104	TCONS_00022612	225049	Ttc7	transcript	1.28356	2.38495	-0.893809	1.15e-05	0.0155632
TCONS_00022949	118568312	LOC118568312	lncRNA	27.2217	0	Inf	0.000820671	0.0276354	mmu-miR-874-3p	67.1603	160.155	-1.1385	0.0024216	0.042104	XM_006517134.5	18193	Nsd1	transcript	1.9852	0.448937	2.1447	0.00060106	0.0276354
TCONS_00022949	118568312	LOC118568312	lncRNA	27.2217	0	Inf	0.000820671	0.0276354	mmu-miR-874-3p	67.1603	160.155	-1.1385	0.0024216	0.042104	TCONS_00001035	21961	Tns1	transcript	39.6786	2.46049	4.01134	0.00031257	0.0276354
TCONS_00022949	118568312	LOC118568312	lncRNA	27.2217	0	Inf	0.000820671	0.0276354	mmu-miR-874-3p	67.1603	160.155	-1.1385	0.0024216	0.042104	NM_011207.2	545622	Ptpn3	transcript	2.85143	0.047324	5.91297	0.000765875	0.0276354
TCONS_00022949	118568312	LOC118568312	lncRNA	27.2217	0	Inf	0.000820671	0.0276354	mmu-miR-874-3p	67.1603	160.155	-1.1385	0.0024216	0.042104	XM_030255147.2	381290	Atp2b4	transcript	1.79149	0	Inf	0.000233871	0.0276354
TCONS_00022949	118568312	LOC118568312	lncRNA	27.2217	0	Inf	0.000820671	0.0276354	mmu-miR-874-3p	67.1603	160.155	-1.1385	0.0024216	0.042104	TCONS_00017675	68519	Eml1	transcript	11.0496	10.9045	0.0190772	0.00239943	0.0465183
TCONS_00022949	118568312	LOC118568312	lncRNA	27.2217	0	Inf	0.000820671	0.0276354	mmu-miR-874-3p	67.1603	160.155	-1.1385	0.0024216	0.042104	NM_177411.4	19344	Rab5b	transcript	15.3906	17.862	-0.214852	0.000321654	0.0276354
TCONS_00022949	118568312	LOC118568312	lncRNA	27.2217	0	Inf	0.000820671	0.0276354	mmu-miR-874-3p	67.1603	160.155	-1.1385	0.0024216	0.042104	NM_023317.2	67203	Nde1	transcript	1.95862	4.78075	-1.2874	2.29e-05	0.0155632
TCONS_00022949	118568312	LOC118568312	lncRNA	27.2217	0	Inf	0.000820671	0.0276354	mmu-miR-874-3p	67.1603	160.155	-1.1385	0.0024216	0.042104	NM_025829.4	66892	Eif4e3	transcript	8.06038	15.9332	-0.98312	2.78e-05	0.0155632
TCONS_00022949	118568312	LOC118568312	lncRNA	27.2217	0	Inf	0.000820671	0.0276354	mmu-miR-874-3p	67.1603	160.155	-1.1385	0.0024216	0.042104	NM_173866.4	108682	Gpt2	transcript	1.46859	5.47079	-1.89731	0.000818569	0.0276354
TCONS_00022949	118568312	LOC118568312	lncRNA	27.2217	0	Inf	0.000820671	0.0276354	mmu-miR-874-3p	67.1603	160.155	-1.1385	0.0024216	0.042104	XM_006524674.5	56468	Socs5	transcript	2.99592	0.0603897	5.63255	0.000527102	0.0276354
TCONS_00022949	118568312	LOC118568312	lncRNA	27.2217	0	Inf	0.000820671	0.0276354	mmu-miR-874-3p	67.1603	160.155	-1.1385	0.0024216	0.042104	XM_006517452.5	76577	Faf2	transcript	0.845375	0	Inf	0.000820671	0.0276354
TCONS_00022949	118568312	LOC118568312	lncRNA	27.2217	0	Inf	0.000820671	0.0276354	mmu-miR-874-3p	67.1603	160.155	-1.1385	0.0024216	0.042104	NM_145605.2	234825	Klhdc4	transcript	1.15389	3.19303	-1.46842	0.000484263	0.0276354
TCONS_00022949	118568312	LOC118568312	lncRNA	27.2217	0	Inf	0.000820671	0.0276354	mmu-miR-874-3p	67.1603	160.155	-1.1385	0.0024216	0.042104	NM_177322.3	11607	Agtr1a	transcript	16.509	9.02107	0.871884	1.52e-05	0.0155632
TCONS_00022949	118568312	LOC118568312	lncRNA	27.2217	0	Inf	0.000820671	0.0276354	mmu-miR-874-3p	67.1603	160.155	-1.1385	0.0024216	0.042104	NM_007802.4	13038	Ctsk	transcript	3.1683	1.31973	1.26347	0.000832761	0.0278144
TCONS_00022949	118568312	LOC118568312	lncRNA	27.2217	0	Inf	0.000820671	0.0276354	mmu-miR-874-3p	67.1603	160.155	-1.1385	0.0024216	0.042104	TCONS_00002486	68295	Aar2	transcript	1.18122	0	Inf	0.000820671	0.0276354
TCONS_00022949	118568312	LOC118568312	lncRNA	27.2217	0	Inf	0.000820671	0.0276354	mmu-miR-874-3p	67.1603	160.155	-1.1385	0.0024216	0.042104	NM_001024606.2	382051	Pdp2	transcript	3.49019	6.43953	-0.883649	0.00130674	0.0342571
TCONS_00022949	118568312	LOC118568312	lncRNA	27.2217	0	Inf	0.000820671	0.0276354	mmu-miR-874-3p	67.1603	160.155	-1.1385	0.0024216	0.042104	NM_001288613.1	245860	Atg9a	transcript	2.10893	0.14069	3.90593	0.000401703	0.0276354
TCONS_00022949	118568312	LOC118568312	lncRNA	27.2217	0	Inf	0.000820671	0.0276354	mmu-miR-874-3p	67.1603	160.155	-1.1385	0.0024216	0.042104	XM_017317778.3	100502841	Epg5	transcript	0.826306	0.00611767	7.07755	0.000717464	0.0276354
TCONS_00022949	118568312	LOC118568312	lncRNA	27.2217	0	Inf	0.000820671	0.0276354	mmu-miR-874-3p	67.1603	160.155	-1.1385	0.0024216	0.042104	NM_130449.2	140792	Colec12	transcript	3.99678	3.31964	0.26781	0.00250276	0.0477182
TCONS_00022949	118568312	LOC118568312	lncRNA	27.2217	0	Inf	0.000820671	0.0276354	mmu-miR-874-3p	67.1603	160.155	-1.1385	0.0024216	0.042104	NM_001362722.1	74103	Nebl	transcript	26.0163	0	Inf	2.74e-05	0.0155632
TCONS_00022949	118568312	LOC118568312	lncRNA	27.2217	0	Inf	0.000820671	0.0276354	mmu-miR-874-3p	67.1603	160.155	-1.1385	0.0024216	0.042104	NM_008664.2	17930	Myom2	transcript	424.854	190.825	1.15472	0.000145974	0.0276354
TCONS_00022949	118568312	LOC118568312	lncRNA	27.2217	0	Inf	0.000820671	0.0276354	mmu-miR-874-3p	67.1603	160.155	-1.1385	0.0024216	0.042104	NM_146243.2	66713	Actr2	transcript	29.0525	22.8911	0.343875	0.00149481	0.0362404
TCONS_00022949	118568312	LOC118568312	lncRNA	27.2217	0	Inf	0.000820671	0.0276354	mmu-miR-874-3p	67.1603	160.155	-1.1385	0.0024216	0.042104	XM_036157952.1	12908	Crat	transcript	3.05654	0	Inf	5.87e-05	0.0211184
TCONS_00022949	118568312	LOC118568312	lncRNA	27.2217	0	Inf	0.000820671	0.0276354	mmu-miR-874-3p	67.1603	160.155	-1.1385	0.0024216	0.042104	NM_026582.5	68151	Wls	transcript	7.4038	5.38228	0.460048	0.000248241	0.0276354
TCONS_00022949	118568312	LOC118568312	lncRNA	27.2217	0	Inf	0.000820671	0.0276354	mmu-miR-874-3p	67.1603	160.155	-1.1385	0.0024216	0.042104	NM_026524.4	68041	Mid1ip1	transcript	37.9267	30.3802	0.320079	0.000987289	0.0299274
TCONS_00022949	118568312	LOC118568312	lncRNA	27.2217	0	Inf	0.000820671	0.0276354	mmu-miR-874-3p	67.1603	160.155	-1.1385	0.0024216	0.042104	XM_006538665.4	192185	Nadk	transcript	0.972007	0.0104583	6.53824	0.00196035	0.0413468
TCONS_00022949	118568312	LOC118568312	lncRNA	27.2217	0	Inf	0.000820671	0.0276354	mmu-miR-874-3p	67.1603	160.155	-1.1385	0.0024216	0.042104	NM_008706.5	18104	Nqo1	transcript	44.8113	23.425	0.935811	0.000167384	0.0276354
TCONS_00022949	118568312	LOC118568312	lncRNA	27.2217	0	Inf	0.000820671	0.0276354	mmu-miR-874-3p	67.1603	160.155	-1.1385	0.0024216	0.042104	NM_025557.1	66425	Pcp4l1	transcript	16.3196	50.2128	-1.62145	0.000300043	0.0276354
TCONS_00022949	118568312	LOC118568312	lncRNA	27.2217	0	Inf	0.000820671	0.0276354	mmu-miR-874-3p	67.1603	160.155	-1.1385	0.0024216	0.042104	NM_175398.4	109050	Inka2	transcript	2.56575	7.08752	-1.4659	0.00255544	0.0482407
TCONS_00022949	118568312	LOC118568312	lncRNA	27.2217	0	Inf	0.000820671	0.0276354	mmu-miR-874-3p	67.1603	160.155	-1.1385	0.0024216	0.042104	NM_001081242.2	70549	Tln2	transcript	2.63951	0.0295667	6.48015	0.000371777	0.0276354
TCONS_00022949	118568312	LOC118568312	lncRNA	27.2217	0	Inf	0.000820671	0.0276354	mmu-miR-874-3p	67.1603	160.155	-1.1385	0.0024216	0.042104	XM_011239446.4	228026	Pdk1	transcript	3.2763	0	Inf	0.000820671	0.0276354
TCONS_00022949	118568312	LOC118568312	lncRNA	27.2217	0	Inf	0.000820671	0.0276354	mmu-miR-874-3p	67.1603	160.155	-1.1385	0.0024216	0.042104	NM_011293.2	20022	Polr2j	transcript	13.2814	15.4381	-0.217088	0.000690938	0.0276354
TCONS_00022949	118568312	LOC118568312	lncRNA	27.2217	0	Inf	0.000820671	0.0276354	mmu-miR-874-3p	67.1603	160.155	-1.1385	0.0024216	0.042104	TCONS_00021414	56637	Gsk3b	transcript	3.22604	0	Inf	0.000820671	0.0276354
TCONS_00022949	118568312	LOC118568312	lncRNA	27.2217	0	Inf	0.000820671	0.0276354	mmu-miR-874-3p	67.1603	160.155	-1.1385	0.0024216	0.042104	NM_026443.4	67900	Mtfp1	transcript	27.5971	35.7028	-0.37152	0.000338742	0.0276354
TCONS_00022949	118568312	LOC118568312	lncRNA	27.2217	0	Inf	0.000820671	0.0276354	mmu-miR-874-3p	67.1603	160.155	-1.1385	0.0024216	0.042104	NM_022891.3	65019	Rpl23	transcript	63.7671	68.7937	-0.109465	0.00161807	0.037419
TCONS_00022949	118568312	LOC118568312	lncRNA	27.2217	0	Inf	0.000820671	0.0276354	mmu-miR-874-3p	67.1603	160.155	-1.1385	0.0024216	0.042104	NM_026824.4	68730	Dus1l	transcript	0	3.13193	#NAME?	0.000987532	0.0299274
TCONS_00022949	118568312	LOC118568312	lncRNA	27.2217	0	Inf	0.000820671	0.0276354	mmu-miR-874-3p	67.1603	160.155	-1.1385	0.0024216	0.042104	NM_025600.2	66498	Dda1	transcript	5.91252	6.16339	-0.0599504	0.000969153	0.0297987
TCONS_00022949	118568312	LOC118568312	lncRNA	27.2217	0	Inf	0.000820671	0.0276354	mmu-miR-874-3p	67.1603	160.155	-1.1385	0.0024216	0.042104	XM_006503677.4	11518	Add1	transcript	1.28784	0.00563833	7.83547	0.000849239	0.028103
TCONS_00022949	118568312	LOC118568312	lncRNA	27.2217	0	Inf	0.000820671	0.0276354	mmu-miR-874-3p	67.1603	160.155	-1.1385	0.0024216	0.042104	NM_001013390.3	399548	Scn4b	transcript	2.15251	16.2847	-2.91942	0.00111032	0.0316263
TCONS_00022949	118568312	LOC118568312	lncRNA	27.2217	0	Inf	0.000820671	0.0276354	mmu-miR-874-3p	67.1603	160.155	-1.1385	0.0024216	0.042104	TCONS_00022043	20656	Sod2	transcript	6.07359	0.19545	4.95768	0.0002461	0.0276354
TCONS_00022949	118568312	LOC118568312	lncRNA	27.2217	0	Inf	0.000820671	0.0276354	mmu-miR-874-3p	67.1603	160.155	-1.1385	0.0024216	0.042104	XM_006515925.4	26932	Ppp2r5e	transcript	1.17794	0.258766	2.18654	0.000952025	0.0296311
TCONS_00022949	118568312	LOC118568312	lncRNA	27.2217	0	Inf	0.000820671	0.0276354	mmu-miR-874-3p	67.1603	160.155	-1.1385	0.0024216	0.042104	NM_009634.6	11564	Adsl	transcript	8.39214	7.60029	0.142984	0.000689457	0.0276354
TCONS_00022949	118568312	LOC118568312	lncRNA	27.2217	0	Inf	0.000820671	0.0276354	mmu-miR-874-3p	67.1603	160.155	-1.1385	0.0024216	0.042104	NM_177059.3	320027	Fstl4	transcript	2.66003	0	Inf	0.00041668	0.0276354
TCONS_00022949	118568312	LOC118568312	lncRNA	27.2217	0	Inf	0.000820671	0.0276354	mmu-miR-874-3p	67.1603	160.155	-1.1385	0.0024216	0.042104	NM_008681.2	17988	Ndrg1	transcript	13.4879	7.27813	0.890022	0.00249471	0.0476436
TCONS_00022949	118568312	LOC118568312	lncRNA	27.2217	0	Inf	0.000820671	0.0276354	mmu-miR-874-3p	67.1603	160.155	-1.1385	0.0024216	0.042104	NM_018743.4	102247	Gpat4	transcript	7.76624	6.97285	0.155467	0.00132739	0.0345061
TCONS_00022949	118568312	LOC118568312	lncRNA	27.2217	0	Inf	0.000820671	0.0276354	mmu-miR-874-3p	67.1603	160.155	-1.1385	0.0024216	0.042104	NM_133702.3	68979	Nol11	transcript	5.69427	3.78451	0.589407	0.00138039	0.0351828
TCONS_00022949	118568312	LOC118568312	lncRNA	27.2217	0	Inf	0.000820671	0.0276354	mmu-miR-874-3p	67.1603	160.155	-1.1385	0.0024216	0.042104	XM_030244718.2	78267	Klhdc8b	transcript	0.935272	0.0147827	5.98341	0.00120816	0.0332056
TCONS_00022949	118568312	LOC118568312	lncRNA	27.2217	0	Inf	0.000820671	0.0276354	mmu-miR-874-3p	67.1603	160.155	-1.1385	0.0024216	0.042104	NM_001113408.2	16825	Ldb1	transcript	7.39907	6.99442	0.0811388	9.29e-05	0.0264941
TCONS_00022949	118568312	LOC118568312	lncRNA	27.2217	0	Inf	0.000820671	0.0276354	mmu-miR-874-3p	67.1603	160.155	-1.1385	0.0024216	0.042104	NM_027113.2	69544	Wdr5b	transcript	2.3334	0.0822317	4.8266	0.00171747	0.0384046
TCONS_00022949	118568312	LOC118568312	lncRNA	27.2217	0	Inf	0.000820671	0.0276354	mmu-miR-874-3p	67.1603	160.155	-1.1385	0.0024216	0.042104	NM_009647.5	11639	Ak4	transcript	3.29582	0.0275303	6.90347	0.00015385	0.0276354
TCONS_00022949	118568312	LOC118568312	lncRNA	27.2217	0	Inf	0.000820671	0.0276354	mmu-miR-874-3p	67.1603	160.155	-1.1385	0.0024216	0.042104	XM_036165784.1	12321	Calu	transcript	10.5439	16.3948	-0.636826	0.00157708	0.0372453
TCONS_00022949	118568312	LOC118568312	lncRNA	27.2217	0	Inf	0.000820671	0.0276354	mmu-miR-874-3p	67.1603	160.155	-1.1385	0.0024216	0.042104	NM_019694.2	56384	Letm1	transcript	5.73717	11.2145	-0.966953	0.000238425	0.0276354
TCONS_00022949	118568312	LOC118568312	lncRNA	27.2217	0	Inf	0.000820671	0.0276354	mmu-miR-874-3p	67.1603	160.155	-1.1385	0.0024216	0.042104	NM_025828.3	66890	Lman2	transcript	13.183	13.5281	-0.0372866	0.00183952	0.0400109
TCONS_00022949	118568312	LOC118568312	lncRNA	27.2217	0	Inf	0.000820671	0.0276354	mmu-miR-874-3p	67.1603	160.155	-1.1385	0.0024216	0.042104	NM_009710.4	11870	Art1	transcript	35.968	53.38	-0.569584	0.000340564	0.0276354
TCONS_00022949	118568312	LOC118568312	lncRNA	27.2217	0	Inf	0.000820671	0.0276354	mmu-miR-874-3p	67.1603	160.155	-1.1385	0.0024216	0.042104	XM_036161439.1	14773	Grk5	transcript	3.29743	0	Inf	0.000145308	0.0276354
TCONS_00022949	118568312	LOC118568312	lncRNA	27.2217	0	Inf	0.000820671	0.0276354	mmu-miR-874-3p	67.1603	160.155	-1.1385	0.0024216	0.042104	XM_036161998.1	241694	Ralgapa2	transcript	4.94291	0.169671	4.86455	0.000222044	0.0276354
TCONS_00022949	118568312	LOC118568312	lncRNA	27.2217	0	Inf	0.000820671	0.0276354	mmu-miR-874-3p	67.1603	160.155	-1.1385	0.0024216	0.042104	NM_175236.5	76187	Adhfe1	transcript	5.22125	5.88058	-0.171562	0.00131045	0.0342571
TCONS_00022949	118568312	LOC118568312	lncRNA	27.2217	0	Inf	0.000820671	0.0276354	mmu-miR-874-3p	67.1603	160.155	-1.1385	0.0024216	0.042104	TCONS_00022742	30957	Mapk8ip3	transcript	0.033413	2.79614	-6.38688	0.000274522	0.0276354
TCONS_00022949	118568312	LOC118568312	lncRNA	27.2217	0	Inf	0.000820671	0.0276354	mmu-miR-874-3p	67.1603	160.155	-1.1385	0.0024216	0.042104	NM_001012477.2	20315	Cxcl12	transcript	8.72303	23.6765	-1.44055	0.000741939	0.0276354
TCONS_00022949	118568312	LOC118568312	lncRNA	27.2217	0	Inf	0.000820671	0.0276354	mmu-miR-874-3p	67.1603	160.155	-1.1385	0.0024216	0.042104	NM_024214.2	67952	Tomm20	transcript	10.2066	7.84903	0.378922	0.000773909	0.0276354
TCONS_00022949	118568312	LOC118568312	lncRNA	27.2217	0	Inf	0.000820671	0.0276354	mmu-miR-874-3p	67.1603	160.155	-1.1385	0.0024216	0.042104	XM_006518707.3	19056	Ppp3cb	transcript	0.007019	4.54103	-9.33754	0.00110514	0.0316263
TCONS_00022949	118568312	LOC118568312	lncRNA	27.2217	0	Inf	0.000820671	0.0276354	mmu-miR-874-3p	67.1603	160.155	-1.1385	0.0024216	0.042104	NM_025407.2	22273	Uqcrc1	transcript	305.19	377.485	-0.306711	0.000478795	0.0276354
TCONS_00022949	118568312	LOC118568312	lncRNA	27.2217	0	Inf	0.000820671	0.0276354	mmu-miR-874-3p	67.1603	160.155	-1.1385	0.0024216	0.042104	NM_001013024.2	72607	Usp13	transcript	43.9871	44.7173	-0.0237507	0.000631592	0.0276354
TCONS_00022949	118568312	LOC118568312	lncRNA	27.2217	0	Inf	0.000820671	0.0276354	mmu-miR-874-3p	67.1603	160.155	-1.1385	0.0024216	0.042104	TCONS_00014905	216161	Sbno2	transcript	4.64735	3.20414	0.536473	0.00139977	0.0352728
TCONS_00022949	118568312	LOC118568312	lncRNA	27.2217	0	Inf	0.000820671	0.0276354	mmu-miR-874-3p	67.1603	160.155	-1.1385	0.0024216	0.042104	NM_001115132.2	52683	Ncaph2	transcript	3.1926	0.540685	2.56187	0.00108613	0.0314517
TCONS_00022949	118568312	LOC118568312	lncRNA	27.2217	0	Inf	0.000820671	0.0276354	mmu-miR-874-3p	67.1603	160.155	-1.1385	0.0024216	0.042104	NM_008338.4	15980	Ifngr2	transcript	40.1831	60.2437	-0.584221	7.98e-05	0.0253471
TCONS_00022949	118568312	LOC118568312	lncRNA	27.2217	0	Inf	0.000820671	0.0276354	mmu-miR-874-3p	67.1603	160.155	-1.1385	0.0024216	0.042104	XM_036156491.1	20787	Srebf1	transcript	2.73364	0.07479	5.19183	7.86e-05	0.0253471
TCONS_00022949	118568312	LOC118568312	lncRNA	27.2217	0	Inf	0.000820671	0.0276354	mmu-miR-874-3p	67.1603	160.155	-1.1385	0.0024216	0.042104	NM_008688.3	18029	Nfic	transcript	4.59623	14.0914	-1.61629	0.00200236	0.0419257
TCONS_00022949	118568312	LOC118568312	lncRNA	27.2217	0	Inf	0.000820671	0.0276354	mmu-miR-874-3p	67.1603	160.155	-1.1385	0.0024216	0.042104	XM_036165926.1	18575	Pde1c	transcript	2.25441	0.005907	8.57611	0.000698786	0.0276354
TCONS_00022949	118568312	LOC118568312	lncRNA	27.2217	0	Inf	0.000820671	0.0276354	mmu-miR-874-3p	67.1603	160.155	-1.1385	0.0024216	0.042104	XM_006505459.3	12444	Ccnd2	transcript	3.84378	0.0527657	6.18678	0.000467463	0.0276354
TCONS_00022949	118568312	LOC118568312	lncRNA	27.2217	0	Inf	0.000820671	0.0276354	mmu-miR-874-3p	67.1603	160.155	-1.1385	0.0024216	0.042104	XM_036156605.1	217331	Unk	transcript	0.843465	0	Inf	0.000820671	0.0276354
TCONS_00022949	118568312	LOC118568312	lncRNA	27.2217	0	Inf	0.000820671	0.0276354	mmu-miR-874-3p	67.1603	160.155	-1.1385	0.0024216	0.042104	NM_001169577.1	22214	Ube2h	transcript	1.41218	0.0643033	4.45689	0.00189306	0.0407486
TCONS_00022949	118568312	LOC118568312	lncRNA	27.2217	0	Inf	0.000820671	0.0276354	mmu-miR-874-3p	67.1603	160.155	-1.1385	0.0024216	0.042104	NM_027727.3	69190	Dym	transcript	21.0629	19.308	0.125505	0.00123487	0.0335637
TCONS_00022951	118568312	LOC118568312	lncRNA	20.3941	0	Inf	0.000820671	0.0276354	mmu-miR-874-3p	67.1603	160.155	-1.1385	0.0024216	0.042104	NM_054046.5	23854	Def8	transcript	8.18934	6.47494	0.33888	0.0016116	0.037419
TCONS_00022951	118568312	LOC118568312	lncRNA	20.3941	0	Inf	0.000820671	0.0276354	mmu-miR-874-3p	67.1603	160.155	-1.1385	0.0024216	0.042104	XM_006534391.5	75580	Zbtb4	transcript	1.27003	0	Inf	0.000820671	0.0276354
TCONS_00022951	118568312	LOC118568312	lncRNA	20.3941	0	Inf	0.000820671	0.0276354	mmu-miR-874-3p	67.1603	160.155	-1.1385	0.0024216	0.042104	NM_153080.3	216810	Tom1l2	transcript	1.13139	0.017205	6.03913	0.00117465	0.0326745
TCONS_00022951	118568312	LOC118568312	lncRNA	20.3941	0	Inf	0.000820671	0.0276354	mmu-miR-874-3p	67.1603	160.155	-1.1385	0.0024216	0.042104	NM_011838.4	23936	Lynx1	transcript	25.7672	40.3626	-0.647487	0.000722116	0.0276354
TCONS_00022951	118568312	LOC118568312	lncRNA	20.3941	0	Inf	0.000820671	0.0276354	mmu-miR-874-3p	67.1603	160.155	-1.1385	0.0024216	0.042104	NM_001098225.2	11496	Adam22	transcript	2.58778	0.00525567	8.94362	2.29e-06	0.0151166
TCONS_00022951	118568312	LOC118568312	lncRNA	20.3941	0	Inf	0.000820671	0.0276354	mmu-miR-874-3p	67.1603	160.155	-1.1385	0.0024216	0.042104	XM_030253061.2	100273	Osbpl9	transcript	0.913933	0	Inf	0.000964603	0.0297987
TCONS_00022951	118568312	LOC118568312	lncRNA	20.3941	0	Inf	0.000820671	0.0276354	mmu-miR-874-3p	67.1603	160.155	-1.1385	0.0024216	0.042104	TCONS_00020016	65246	Xpo7	transcript	4.13029	0.00722533	9.15896	0.00116536	0.0326432
TCONS_00022951	118568312	LOC118568312	lncRNA	20.3941	0	Inf	0.000820671	0.0276354	mmu-miR-874-3p	67.1603	160.155	-1.1385	0.0024216	0.042104	TCONS_00023739	76594	Dnajc18	transcript	1.93372	0	Inf	0.000820671	0.0276354
TCONS_00022951	118568312	LOC118568312	lncRNA	20.3941	0	Inf	0.000820671	0.0276354	mmu-miR-874-3p	67.1603	160.155	-1.1385	0.0024216	0.042104	TCONS_00006799	68303	Fam114a1	transcript	0.995193	0	Inf	0.000820671	0.0276354
TCONS_00022951	118568312	LOC118568312	lncRNA	20.3941	0	Inf	0.000820671	0.0276354	mmu-miR-874-3p	67.1603	160.155	-1.1385	0.0024216	0.042104	NM_172925.2	244923	Klhl31	transcript	25.7365	28.473	-0.145783	0.00102428	0.0304533
TCONS_00022951	118568312	LOC118568312	lncRNA	20.3941	0	Inf	0.000820671	0.0276354	mmu-miR-874-3p	67.1603	160.155	-1.1385	0.0024216	0.042104	NM_001347446.1	94089	Trim7	transcript	1.16147	7.15854	-2.62371	0.00045152	0.0276354
TCONS_00022951	118568312	LOC118568312	lncRNA	20.3941	0	Inf	0.000820671	0.0276354	mmu-miR-874-3p	67.1603	160.155	-1.1385	0.0024216	0.042104	NM_009818.1	12385	Ctnna1	transcript	89.2245	90.2244	-0.0160775	0.000857497	0.0281337
TCONS_00022951	118568312	LOC118568312	lncRNA	20.3941	0	Inf	0.000820671	0.0276354	mmu-miR-874-3p	67.1603	160.155	-1.1385	0.0024216	0.042104	NM_001355755.1	17896	Myl4	transcript	9.13829	0.191058	5.57984	0.00178945	0.0391774
TCONS_00022951	118568312	LOC118568312	lncRNA	20.3941	0	Inf	0.000820671	0.0276354	mmu-miR-874-3p	67.1603	160.155	-1.1385	0.0024216	0.042104	XM_036154088.1	319518	Pdpr	transcript	1.61977	3.72043	-1.19968	0.000122455	0.0276354
TCONS_00022951	118568312	LOC118568312	lncRNA	20.3941	0	Inf	0.000820671	0.0276354	mmu-miR-874-3p	67.1603	160.155	-1.1385	0.0024216	0.042104	XM_030246370.1	72729	Cdc42se2	transcript	1.75393	0.133176	3.71919	3e-05	0.0155632
TCONS_00022951	118568312	LOC118568312	lncRNA	20.3941	0	Inf	0.000820671	0.0276354	mmu-miR-874-3p	67.1603	160.155	-1.1385	0.0024216	0.042104	NM_016709.2	11992	Auh	transcript	23.1108	25.9264	-0.165855	0.00124159	0.0335637
TCONS_00022951	118568312	LOC118568312	lncRNA	20.3941	0	Inf	0.000820671	0.0276354	mmu-miR-874-3p	67.1603	160.155	-1.1385	0.0024216	0.042104	TCONS_00022612	225049	Ttc7	transcript	1.28356	2.38495	-0.893809	1.15e-05	0.0155632
TCONS_00022951	118568312	LOC118568312	lncRNA	20.3941	0	Inf	0.000820671	0.0276354	mmu-miR-874-3p	67.1603	160.155	-1.1385	0.0024216	0.042104	XM_006517134.5	18193	Nsd1	transcript	1.9852	0.448937	2.1447	0.00060106	0.0276354
TCONS_00022951	118568312	LOC118568312	lncRNA	20.3941	0	Inf	0.000820671	0.0276354	mmu-miR-874-3p	67.1603	160.155	-1.1385	0.0024216	0.042104	TCONS_00001035	21961	Tns1	transcript	39.6786	2.46049	4.01134	0.00031257	0.0276354
TCONS_00022951	118568312	LOC118568312	lncRNA	20.3941	0	Inf	0.000820671	0.0276354	mmu-miR-874-3p	67.1603	160.155	-1.1385	0.0024216	0.042104	NM_011207.2	545622	Ptpn3	transcript	2.85143	0.047324	5.91297	0.000765875	0.0276354
TCONS_00022951	118568312	LOC118568312	lncRNA	20.3941	0	Inf	0.000820671	0.0276354	mmu-miR-874-3p	67.1603	160.155	-1.1385	0.0024216	0.042104	XM_030255147.2	381290	Atp2b4	transcript	1.79149	0	Inf	0.000233871	0.0276354
TCONS_00022951	118568312	LOC118568312	lncRNA	20.3941	0	Inf	0.000820671	0.0276354	mmu-miR-874-3p	67.1603	160.155	-1.1385	0.0024216	0.042104	TCONS_00017675	68519	Eml1	transcript	11.0496	10.9045	0.0190772	0.00239943	0.0465183
TCONS_00022951	118568312	LOC118568312	lncRNA	20.3941	0	Inf	0.000820671	0.0276354	mmu-miR-874-3p	67.1603	160.155	-1.1385	0.0024216	0.042104	NM_177411.4	19344	Rab5b	transcript	15.3906	17.862	-0.214852	0.000321654	0.0276354
TCONS_00022951	118568312	LOC118568312	lncRNA	20.3941	0	Inf	0.000820671	0.0276354	mmu-miR-874-3p	67.1603	160.155	-1.1385	0.0024216	0.042104	NM_023317.2	67203	Nde1	transcript	1.95862	4.78075	-1.2874	2.29e-05	0.0155632
TCONS_00022951	118568312	LOC118568312	lncRNA	20.3941	0	Inf	0.000820671	0.0276354	mmu-miR-874-3p	67.1603	160.155	-1.1385	0.0024216	0.042104	NM_025829.4	66892	Eif4e3	transcript	8.06038	15.9332	-0.98312	2.78e-05	0.0155632
TCONS_00022951	118568312	LOC118568312	lncRNA	20.3941	0	Inf	0.000820671	0.0276354	mmu-miR-874-3p	67.1603	160.155	-1.1385	0.0024216	0.042104	NM_173866.4	108682	Gpt2	transcript	1.46859	5.47079	-1.89731	0.000818569	0.0276354
TCONS_00022951	118568312	LOC118568312	lncRNA	20.3941	0	Inf	0.000820671	0.0276354	mmu-miR-874-3p	67.1603	160.155	-1.1385	0.0024216	0.042104	XM_006524674.5	56468	Socs5	transcript	2.99592	0.0603897	5.63255	0.000527102	0.0276354
TCONS_00022951	118568312	LOC118568312	lncRNA	20.3941	0	Inf	0.000820671	0.0276354	mmu-miR-874-3p	67.1603	160.155	-1.1385	0.0024216	0.042104	XM_006517452.5	76577	Faf2	transcript	0.845375	0	Inf	0.000820671	0.0276354
TCONS_00022951	118568312	LOC118568312	lncRNA	20.3941	0	Inf	0.000820671	0.0276354	mmu-miR-874-3p	67.1603	160.155	-1.1385	0.0024216	0.042104	NM_145605.2	234825	Klhdc4	transcript	1.15389	3.19303	-1.46842	0.000484263	0.0276354
TCONS_00022951	118568312	LOC118568312	lncRNA	20.3941	0	Inf	0.000820671	0.0276354	mmu-miR-874-3p	67.1603	160.155	-1.1385	0.0024216	0.042104	NM_177322.3	11607	Agtr1a	transcript	16.509	9.02107	0.871884	1.52e-05	0.0155632
TCONS_00022951	118568312	LOC118568312	lncRNA	20.3941	0	Inf	0.000820671	0.0276354	mmu-miR-874-3p	67.1603	160.155	-1.1385	0.0024216	0.042104	NM_007802.4	13038	Ctsk	transcript	3.1683	1.31973	1.26347	0.000832761	0.0278144
TCONS_00022951	118568312	LOC118568312	lncRNA	20.3941	0	Inf	0.000820671	0.0276354	mmu-miR-874-3p	67.1603	160.155	-1.1385	0.0024216	0.042104	TCONS_00002486	68295	Aar2	transcript	1.18122	0	Inf	0.000820671	0.0276354
TCONS_00022951	118568312	LOC118568312	lncRNA	20.3941	0	Inf	0.000820671	0.0276354	mmu-miR-874-3p	67.1603	160.155	-1.1385	0.0024216	0.042104	NM_001024606.2	382051	Pdp2	transcript	3.49019	6.43953	-0.883649	0.00130674	0.0342571
TCONS_00022951	118568312	LOC118568312	lncRNA	20.3941	0	Inf	0.000820671	0.0276354	mmu-miR-874-3p	67.1603	160.155	-1.1385	0.0024216	0.042104	NM_001288613.1	245860	Atg9a	transcript	2.10893	0.14069	3.90593	0.000401703	0.0276354
TCONS_00022951	118568312	LOC118568312	lncRNA	20.3941	0	Inf	0.000820671	0.0276354	mmu-miR-874-3p	67.1603	160.155	-1.1385	0.0024216	0.042104	XM_017317778.3	100502841	Epg5	transcript	0.826306	0.00611767	7.07755	0.000717464	0.0276354
TCONS_00022951	118568312	LOC118568312	lncRNA	20.3941	0	Inf	0.000820671	0.0276354	mmu-miR-874-3p	67.1603	160.155	-1.1385	0.0024216	0.042104	NM_130449.2	140792	Colec12	transcript	3.99678	3.31964	0.26781	0.00250276	0.0477182
TCONS_00022951	118568312	LOC118568312	lncRNA	20.3941	0	Inf	0.000820671	0.0276354	mmu-miR-874-3p	67.1603	160.155	-1.1385	0.0024216	0.042104	NM_001362722.1	74103	Nebl	transcript	26.0163	0	Inf	2.74e-05	0.0155632
TCONS_00022951	118568312	LOC118568312	lncRNA	20.3941	0	Inf	0.000820671	0.0276354	mmu-miR-874-3p	67.1603	160.155	-1.1385	0.0024216	0.042104	NM_008664.2	17930	Myom2	transcript	424.854	190.825	1.15472	0.000145974	0.0276354
TCONS_00022951	118568312	LOC118568312	lncRNA	20.3941	0	Inf	0.000820671	0.0276354	mmu-miR-874-3p	67.1603	160.155	-1.1385	0.0024216	0.042104	NM_146243.2	66713	Actr2	transcript	29.0525	22.8911	0.343875	0.00149481	0.0362404
TCONS_00022951	118568312	LOC118568312	lncRNA	20.3941	0	Inf	0.000820671	0.0276354	mmu-miR-874-3p	67.1603	160.155	-1.1385	0.0024216	0.042104	XM_036157952.1	12908	Crat	transcript	3.05654	0	Inf	5.87e-05	0.0211184
TCONS_00022951	118568312	LOC118568312	lncRNA	20.3941	0	Inf	0.000820671	0.0276354	mmu-miR-874-3p	67.1603	160.155	-1.1385	0.0024216	0.042104	NM_026582.5	68151	Wls	transcript	7.4038	5.38228	0.460048	0.000248241	0.0276354
TCONS_00022951	118568312	LOC118568312	lncRNA	20.3941	0	Inf	0.000820671	0.0276354	mmu-miR-874-3p	67.1603	160.155	-1.1385	0.0024216	0.042104	NM_026524.4	68041	Mid1ip1	transcript	37.9267	30.3802	0.320079	0.000987289	0.0299274
TCONS_00022951	118568312	LOC118568312	lncRNA	20.3941	0	Inf	0.000820671	0.0276354	mmu-miR-874-3p	67.1603	160.155	-1.1385	0.0024216	0.042104	XM_006538665.4	192185	Nadk	transcript	0.972007	0.0104583	6.53824	0.00196035	0.0413468
TCONS_00022951	118568312	LOC118568312	lncRNA	20.3941	0	Inf	0.000820671	0.0276354	mmu-miR-874-3p	67.1603	160.155	-1.1385	0.0024216	0.042104	NM_008706.5	18104	Nqo1	transcript	44.8113	23.425	0.935811	0.000167384	0.0276354
TCONS_00022951	118568312	LOC118568312	lncRNA	20.3941	0	Inf	0.000820671	0.0276354	mmu-miR-874-3p	67.1603	160.155	-1.1385	0.0024216	0.042104	NM_025557.1	66425	Pcp4l1	transcript	16.3196	50.2128	-1.62145	0.000300043	0.0276354
TCONS_00022951	118568312	LOC118568312	lncRNA	20.3941	0	Inf	0.000820671	0.0276354	mmu-miR-874-3p	67.1603	160.155	-1.1385	0.0024216	0.042104	NM_175398.4	109050	Inka2	transcript	2.56575	7.08752	-1.4659	0.00255544	0.0482407
TCONS_00022951	118568312	LOC118568312	lncRNA	20.3941	0	Inf	0.000820671	0.0276354	mmu-miR-874-3p	67.1603	160.155	-1.1385	0.0024216	0.042104	NM_001081242.2	70549	Tln2	transcript	2.63951	0.0295667	6.48015	0.000371777	0.0276354
TCONS_00022951	118568312	LOC118568312	lncRNA	20.3941	0	Inf	0.000820671	0.0276354	mmu-miR-874-3p	67.1603	160.155	-1.1385	0.0024216	0.042104	XM_011239446.4	228026	Pdk1	transcript	3.2763	0	Inf	0.000820671	0.0276354
TCONS_00022951	118568312	LOC118568312	lncRNA	20.3941	0	Inf	0.000820671	0.0276354	mmu-miR-874-3p	67.1603	160.155	-1.1385	0.0024216	0.042104	NM_011293.2	20022	Polr2j	transcript	13.2814	15.4381	-0.217088	0.000690938	0.0276354
TCONS_00022951	118568312	LOC118568312	lncRNA	20.3941	0	Inf	0.000820671	0.0276354	mmu-miR-874-3p	67.1603	160.155	-1.1385	0.0024216	0.042104	TCONS_00021414	56637	Gsk3b	transcript	3.22604	0	Inf	0.000820671	0.0276354
TCONS_00022951	118568312	LOC118568312	lncRNA	20.3941	0	Inf	0.000820671	0.0276354	mmu-miR-874-3p	67.1603	160.155	-1.1385	0.0024216	0.042104	NM_026443.4	67900	Mtfp1	transcript	27.5971	35.7028	-0.37152	0.000338742	0.0276354
TCONS_00022951	118568312	LOC118568312	lncRNA	20.3941	0	Inf	0.000820671	0.0276354	mmu-miR-874-3p	67.1603	160.155	-1.1385	0.0024216	0.042104	NM_022891.3	65019	Rpl23	transcript	63.7671	68.7937	-0.109465	0.00161807	0.037419
TCONS_00022951	118568312	LOC118568312	lncRNA	20.3941	0	Inf	0.000820671	0.0276354	mmu-miR-874-3p	67.1603	160.155	-1.1385	0.0024216	0.042104	NM_026824.4	68730	Dus1l	transcript	0	3.13193	#NAME?	0.000987532	0.0299274
TCONS_00022951	118568312	LOC118568312	lncRNA	20.3941	0	Inf	0.000820671	0.0276354	mmu-miR-874-3p	67.1603	160.155	-1.1385	0.0024216	0.042104	NM_025600.2	66498	Dda1	transcript	5.91252	6.16339	-0.0599504	0.000969153	0.0297987
TCONS_00022951	118568312	LOC118568312	lncRNA	20.3941	0	Inf	0.000820671	0.0276354	mmu-miR-874-3p	67.1603	160.155	-1.1385	0.0024216	0.042104	XM_006503677.4	11518	Add1	transcript	1.28784	0.00563833	7.83547	0.000849239	0.028103
TCONS_00022951	118568312	LOC118568312	lncRNA	20.3941	0	Inf	0.000820671	0.0276354	mmu-miR-874-3p	67.1603	160.155	-1.1385	0.0024216	0.042104	NM_001013390.3	399548	Scn4b	transcript	2.15251	16.2847	-2.91942	0.00111032	0.0316263
TCONS_00022951	118568312	LOC118568312	lncRNA	20.3941	0	Inf	0.000820671	0.0276354	mmu-miR-874-3p	67.1603	160.155	-1.1385	0.0024216	0.042104	TCONS_00022043	20656	Sod2	transcript	6.07359	0.19545	4.95768	0.0002461	0.0276354
TCONS_00022951	118568312	LOC118568312	lncRNA	20.3941	0	Inf	0.000820671	0.0276354	mmu-miR-874-3p	67.1603	160.155	-1.1385	0.0024216	0.042104	XM_006515925.4	26932	Ppp2r5e	transcript	1.17794	0.258766	2.18654	0.000952025	0.0296311
TCONS_00022951	118568312	LOC118568312	lncRNA	20.3941	0	Inf	0.000820671	0.0276354	mmu-miR-874-3p	67.1603	160.155	-1.1385	0.0024216	0.042104	NM_009634.6	11564	Adsl	transcript	8.39214	7.60029	0.142984	0.000689457	0.0276354
TCONS_00022951	118568312	LOC118568312	lncRNA	20.3941	0	Inf	0.000820671	0.0276354	mmu-miR-874-3p	67.1603	160.155	-1.1385	0.0024216	0.042104	NM_177059.3	320027	Fstl4	transcript	2.66003	0	Inf	0.00041668	0.0276354
TCONS_00022951	118568312	LOC118568312	lncRNA	20.3941	0	Inf	0.000820671	0.0276354	mmu-miR-874-3p	67.1603	160.155	-1.1385	0.0024216	0.042104	NM_008681.2	17988	Ndrg1	transcript	13.4879	7.27813	0.890022	0.00249471	0.0476436
TCONS_00022951	118568312	LOC118568312	lncRNA	20.3941	0	Inf	0.000820671	0.0276354	mmu-miR-874-3p	67.1603	160.155	-1.1385	0.0024216	0.042104	NM_018743.4	102247	Gpat4	transcript	7.76624	6.97285	0.155467	0.00132739	0.0345061
TCONS_00022951	118568312	LOC118568312	lncRNA	20.3941	0	Inf	0.000820671	0.0276354	mmu-miR-874-3p	67.1603	160.155	-1.1385	0.0024216	0.042104	NM_133702.3	68979	Nol11	transcript	5.69427	3.78451	0.589407	0.00138039	0.0351828
TCONS_00022951	118568312	LOC118568312	lncRNA	20.3941	0	Inf	0.000820671	0.0276354	mmu-miR-874-3p	67.1603	160.155	-1.1385	0.0024216	0.042104	XM_030244718.2	78267	Klhdc8b	transcript	0.935272	0.0147827	5.98341	0.00120816	0.0332056
TCONS_00022951	118568312	LOC118568312	lncRNA	20.3941	0	Inf	0.000820671	0.0276354	mmu-miR-874-3p	67.1603	160.155	-1.1385	0.0024216	0.042104	NM_001113408.2	16825	Ldb1	transcript	7.39907	6.99442	0.0811388	9.29e-05	0.0264941
TCONS_00022951	118568312	LOC118568312	lncRNA	20.3941	0	Inf	0.000820671	0.0276354	mmu-miR-874-3p	67.1603	160.155	-1.1385	0.0024216	0.042104	NM_027113.2	69544	Wdr5b	transcript	2.3334	0.0822317	4.8266	0.00171747	0.0384046
TCONS_00022951	118568312	LOC118568312	lncRNA	20.3941	0	Inf	0.000820671	0.0276354	mmu-miR-874-3p	67.1603	160.155	-1.1385	0.0024216	0.042104	NM_009647.5	11639	Ak4	transcript	3.29582	0.0275303	6.90347	0.00015385	0.0276354
TCONS_00022951	118568312	LOC118568312	lncRNA	20.3941	0	Inf	0.000820671	0.0276354	mmu-miR-874-3p	67.1603	160.155	-1.1385	0.0024216	0.042104	XM_036165784.1	12321	Calu	transcript	10.5439	16.3948	-0.636826	0.00157708	0.0372453
TCONS_00022951	118568312	LOC118568312	lncRNA	20.3941	0	Inf	0.000820671	0.0276354	mmu-miR-874-3p	67.1603	160.155	-1.1385	0.0024216	0.042104	NM_019694.2	56384	Letm1	transcript	5.73717	11.2145	-0.966953	0.000238425	0.0276354
TCONS_00022951	118568312	LOC118568312	lncRNA	20.3941	0	Inf	0.000820671	0.0276354	mmu-miR-874-3p	67.1603	160.155	-1.1385	0.0024216	0.042104	NM_025828.3	66890	Lman2	transcript	13.183	13.5281	-0.0372866	0.00183952	0.0400109
TCONS_00022951	118568312	LOC118568312	lncRNA	20.3941	0	Inf	0.000820671	0.0276354	mmu-miR-874-3p	67.1603	160.155	-1.1385	0.0024216	0.042104	NM_009710.4	11870	Art1	transcript	35.968	53.38	-0.569584	0.000340564	0.0276354
TCONS_00022951	118568312	LOC118568312	lncRNA	20.3941	0	Inf	0.000820671	0.0276354	mmu-miR-874-3p	67.1603	160.155	-1.1385	0.0024216	0.042104	XM_036161439.1	14773	Grk5	transcript	3.29743	0	Inf	0.000145308	0.0276354
TCONS_00022951	118568312	LOC118568312	lncRNA	20.3941	0	Inf	0.000820671	0.0276354	mmu-miR-874-3p	67.1603	160.155	-1.1385	0.0024216	0.042104	XM_036161998.1	241694	Ralgapa2	transcript	4.94291	0.169671	4.86455	0.000222044	0.0276354
TCONS_00022951	118568312	LOC118568312	lncRNA	20.3941	0	Inf	0.000820671	0.0276354	mmu-miR-874-3p	67.1603	160.155	-1.1385	0.0024216	0.042104	NM_175236.5	76187	Adhfe1	transcript	5.22125	5.88058	-0.171562	0.00131045	0.0342571
TCONS_00022951	118568312	LOC118568312	lncRNA	20.3941	0	Inf	0.000820671	0.0276354	mmu-miR-874-3p	67.1603	160.155	-1.1385	0.0024216	0.042104	TCONS_00022742	30957	Mapk8ip3	transcript	0.033413	2.79614	-6.38688	0.000274522	0.0276354
TCONS_00022951	118568312	LOC118568312	lncRNA	20.3941	0	Inf	0.000820671	0.0276354	mmu-miR-874-3p	67.1603	160.155	-1.1385	0.0024216	0.042104	NM_001012477.2	20315	Cxcl12	transcript	8.72303	23.6765	-1.44055	0.000741939	0.0276354
TCONS_00022951	118568312	LOC118568312	lncRNA	20.3941	0	Inf	0.000820671	0.0276354	mmu-miR-874-3p	67.1603	160.155	-1.1385	0.0024216	0.042104	NM_024214.2	67952	Tomm20	transcript	10.2066	7.84903	0.378922	0.000773909	0.0276354
TCONS_00022951	118568312	LOC118568312	lncRNA	20.3941	0	Inf	0.000820671	0.0276354	mmu-miR-874-3p	67.1603	160.155	-1.1385	0.0024216	0.042104	XM_006518707.3	19056	Ppp3cb	transcript	0.007019	4.54103	-9.33754	0.00110514	0.0316263
TCONS_00022951	118568312	LOC118568312	lncRNA	20.3941	0	Inf	0.000820671	0.0276354	mmu-miR-874-3p	67.1603	160.155	-1.1385	0.0024216	0.042104	NM_025407.2	22273	Uqcrc1	transcript	305.19	377.485	-0.306711	0.000478795	0.0276354
TCONS_00022951	118568312	LOC118568312	lncRNA	20.3941	0	Inf	0.000820671	0.0276354	mmu-miR-874-3p	67.1603	160.155	-1.1385	0.0024216	0.042104	NM_001013024.2	72607	Usp13	transcript	43.9871	44.7173	-0.0237507	0.000631592	0.0276354
TCONS_00022951	118568312	LOC118568312	lncRNA	20.3941	0	Inf	0.000820671	0.0276354	mmu-miR-874-3p	67.1603	160.155	-1.1385	0.0024216	0.042104	TCONS_00014905	216161	Sbno2	transcript	4.64735	3.20414	0.536473	0.00139977	0.0352728
TCONS_00022951	118568312	LOC118568312	lncRNA	20.3941	0	Inf	0.000820671	0.0276354	mmu-miR-874-3p	67.1603	160.155	-1.1385	0.0024216	0.042104	NM_001115132.2	52683	Ncaph2	transcript	3.1926	0.540685	2.56187	0.00108613	0.0314517
TCONS_00022951	118568312	LOC118568312	lncRNA	20.3941	0	Inf	0.000820671	0.0276354	mmu-miR-874-3p	67.1603	160.155	-1.1385	0.0024216	0.042104	NM_008338.4	15980	Ifngr2	transcript	40.1831	60.2437	-0.584221	7.98e-05	0.0253471
TCONS_00022951	118568312	LOC118568312	lncRNA	20.3941	0	Inf	0.000820671	0.0276354	mmu-miR-874-3p	67.1603	160.155	-1.1385	0.0024216	0.042104	XM_036156491.1	20787	Srebf1	transcript	2.73364	0.07479	5.19183	7.86e-05	0.0253471
TCONS_00022951	118568312	LOC118568312	lncRNA	20.3941	0	Inf	0.000820671	0.0276354	mmu-miR-874-3p	67.1603	160.155	-1.1385	0.0024216	0.042104	NM_008688.3	18029	Nfic	transcript	4.59623	14.0914	-1.61629	0.00200236	0.0419257
TCONS_00022951	118568312	LOC118568312	lncRNA	20.3941	0	Inf	0.000820671	0.0276354	mmu-miR-874-3p	67.1603	160.155	-1.1385	0.0024216	0.042104	XM_036165926.1	18575	Pde1c	transcript	2.25441	0.005907	8.57611	0.000698786	0.0276354
TCONS_00022951	118568312	LOC118568312	lncRNA	20.3941	0	Inf	0.000820671	0.0276354	mmu-miR-874-3p	67.1603	160.155	-1.1385	0.0024216	0.042104	XM_006505459.3	12444	Ccnd2	transcript	3.84378	0.0527657	6.18678	0.000467463	0.0276354
TCONS_00022951	118568312	LOC118568312	lncRNA	20.3941	0	Inf	0.000820671	0.0276354	mmu-miR-874-3p	67.1603	160.155	-1.1385	0.0024216	0.042104	XM_036156605.1	217331	Unk	transcript	0.843465	0	Inf	0.000820671	0.0276354
TCONS_00022951	118568312	LOC118568312	lncRNA	20.3941	0	Inf	0.000820671	0.0276354	mmu-miR-874-3p	67.1603	160.155	-1.1385	0.0024216	0.042104	NM_001169577.1	22214	Ube2h	transcript	1.41218	0.0643033	4.45689	0.00189306	0.0407486
TCONS_00022951	118568312	LOC118568312	lncRNA	20.3941	0	Inf	0.000820671	0.0276354	mmu-miR-874-3p	67.1603	160.155	-1.1385	0.0024216	0.042104	NM_027727.3	69190	Dym	transcript	21.0629	19.308	0.125505	0.00123487	0.0335637
XR_004934374.1	102635071	Gm26944	lncRNA	0.987437	0	Inf	0.00261628	0.0488316	mmu-miR-874-3p	67.1603	160.155	-1.1385	0.0024216	0.042104	NM_054046.5	23854	Def8	transcript	8.18934	6.47494	0.33888	0.0016116	0.037419
XR_004934374.1	102635071	Gm26944	lncRNA	0.987437	0	Inf	0.00261628	0.0488316	mmu-miR-874-3p	67.1603	160.155	-1.1385	0.0024216	0.042104	XM_006534391.5	75580	Zbtb4	transcript	1.27003	0	Inf	0.000820671	0.0276354
XR_004934374.1	102635071	Gm26944	lncRNA	0.987437	0	Inf	0.00261628	0.0488316	mmu-miR-874-3p	67.1603	160.155	-1.1385	0.0024216	0.042104	NM_153080.3	216810	Tom1l2	transcript	1.13139	0.017205	6.03913	0.00117465	0.0326745
XR_004934374.1	102635071	Gm26944	lncRNA	0.987437	0	Inf	0.00261628	0.0488316	mmu-miR-874-3p	67.1603	160.155	-1.1385	0.0024216	0.042104	NM_011838.4	23936	Lynx1	transcript	25.7672	40.3626	-0.647487	0.000722116	0.0276354
XR_004934374.1	102635071	Gm26944	lncRNA	0.987437	0	Inf	0.00261628	0.0488316	mmu-miR-874-3p	67.1603	160.155	-1.1385	0.0024216	0.042104	NM_001098225.2	11496	Adam22	transcript	2.58778	0.00525567	8.94362	2.29e-06	0.0151166
XR_004934374.1	102635071	Gm26944	lncRNA	0.987437	0	Inf	0.00261628	0.0488316	mmu-miR-874-3p	67.1603	160.155	-1.1385	0.0024216	0.042104	XM_030253061.2	100273	Osbpl9	transcript	0.913933	0	Inf	0.000964603	0.0297987
XR_004934374.1	102635071	Gm26944	lncRNA	0.987437	0	Inf	0.00261628	0.0488316	mmu-miR-874-3p	67.1603	160.155	-1.1385	0.0024216	0.042104	TCONS_00020016	65246	Xpo7	transcript	4.13029	0.00722533	9.15896	0.00116536	0.0326432
XR_004934374.1	102635071	Gm26944	lncRNA	0.987437	0	Inf	0.00261628	0.0488316	mmu-miR-874-3p	67.1603	160.155	-1.1385	0.0024216	0.042104	TCONS_00023739	76594	Dnajc18	transcript	1.93372	0	Inf	0.000820671	0.0276354
XR_004934374.1	102635071	Gm26944	lncRNA	0.987437	0	Inf	0.00261628	0.0488316	mmu-miR-874-3p	67.1603	160.155	-1.1385	0.0024216	0.042104	TCONS_00006799	68303	Fam114a1	transcript	0.995193	0	Inf	0.000820671	0.0276354
XR_004934374.1	102635071	Gm26944	lncRNA	0.987437	0	Inf	0.00261628	0.0488316	mmu-miR-874-3p	67.1603	160.155	-1.1385	0.0024216	0.042104	NM_172925.2	244923	Klhl31	transcript	25.7365	28.473	-0.145783	0.00102428	0.0304533
XR_004934374.1	102635071	Gm26944	lncRNA	0.987437	0	Inf	0.00261628	0.0488316	mmu-miR-874-3p	67.1603	160.155	-1.1385	0.0024216	0.042104	NM_001347446.1	94089	Trim7	transcript	1.16147	7.15854	-2.62371	0.00045152	0.0276354
XR_004934374.1	102635071	Gm26944	lncRNA	0.987437	0	Inf	0.00261628	0.0488316	mmu-miR-874-3p	67.1603	160.155	-1.1385	0.0024216	0.042104	NM_009818.1	12385	Ctnna1	transcript	89.2245	90.2244	-0.0160775	0.000857497	0.0281337
XR_004934374.1	102635071	Gm26944	lncRNA	0.987437	0	Inf	0.00261628	0.0488316	mmu-miR-874-3p	67.1603	160.155	-1.1385	0.0024216	0.042104	NM_001355755.1	17896	Myl4	transcript	9.13829	0.191058	5.57984	0.00178945	0.0391774
XR_004934374.1	102635071	Gm26944	lncRNA	0.987437	0	Inf	0.00261628	0.0488316	mmu-miR-874-3p	67.1603	160.155	-1.1385	0.0024216	0.042104	XM_036154088.1	319518	Pdpr	transcript	1.61977	3.72043	-1.19968	0.000122455	0.0276354
XR_004934374.1	102635071	Gm26944	lncRNA	0.987437	0	Inf	0.00261628	0.0488316	mmu-miR-874-3p	67.1603	160.155	-1.1385	0.0024216	0.042104	XM_030246370.1	72729	Cdc42se2	transcript	1.75393	0.133176	3.71919	3e-05	0.0155632
XR_004934374.1	102635071	Gm26944	lncRNA	0.987437	0	Inf	0.00261628	0.0488316	mmu-miR-874-3p	67.1603	160.155	-1.1385	0.0024216	0.042104	NM_016709.2	11992	Auh	transcript	23.1108	25.9264	-0.165855	0.00124159	0.0335637
XR_004934374.1	102635071	Gm26944	lncRNA	0.987437	0	Inf	0.00261628	0.0488316	mmu-miR-874-3p	67.1603	160.155	-1.1385	0.0024216	0.042104	TCONS_00022612	225049	Ttc7	transcript	1.28356	2.38495	-0.893809	1.15e-05	0.0155632
XR_004934374.1	102635071	Gm26944	lncRNA	0.987437	0	Inf	0.00261628	0.0488316	mmu-miR-874-3p	67.1603	160.155	-1.1385	0.0024216	0.042104	XM_006517134.5	18193	Nsd1	transcript	1.9852	0.448937	2.1447	0.00060106	0.0276354
XR_004934374.1	102635071	Gm26944	lncRNA	0.987437	0	Inf	0.00261628	0.0488316	mmu-miR-874-3p	67.1603	160.155	-1.1385	0.0024216	0.042104	TCONS_00001035	21961	Tns1	transcript	39.6786	2.46049	4.01134	0.00031257	0.0276354
XR_004934374.1	102635071	Gm26944	lncRNA	0.987437	0	Inf	0.00261628	0.0488316	mmu-miR-874-3p	67.1603	160.155	-1.1385	0.0024216	0.042104	NM_011207.2	545622	Ptpn3	transcript	2.85143	0.047324	5.91297	0.000765875	0.0276354
XR_004934374.1	102635071	Gm26944	lncRNA	0.987437	0	Inf	0.00261628	0.0488316	mmu-miR-874-3p	67.1603	160.155	-1.1385	0.0024216	0.042104	XM_030255147.2	381290	Atp2b4	transcript	1.79149	0	Inf	0.000233871	0.0276354
XR_004934374.1	102635071	Gm26944	lncRNA	0.987437	0	Inf	0.00261628	0.0488316	mmu-miR-874-3p	67.1603	160.155	-1.1385	0.0024216	0.042104	TCONS_00017675	68519	Eml1	transcript	11.0496	10.9045	0.0190772	0.00239943	0.0465183
XR_004934374.1	102635071	Gm26944	lncRNA	0.987437	0	Inf	0.00261628	0.0488316	mmu-miR-874-3p	67.1603	160.155	-1.1385	0.0024216	0.042104	NM_177411.4	19344	Rab5b	transcript	15.3906	17.862	-0.214852	0.000321654	0.0276354
XR_004934374.1	102635071	Gm26944	lncRNA	0.987437	0	Inf	0.00261628	0.0488316	mmu-miR-874-3p	67.1603	160.155	-1.1385	0.0024216	0.042104	NM_023317.2	67203	Nde1	transcript	1.95862	4.78075	-1.2874	2.29e-05	0.0155632
XR_004934374.1	102635071	Gm26944	lncRNA	0.987437	0	Inf	0.00261628	0.0488316	mmu-miR-874-3p	67.1603	160.155	-1.1385	0.0024216	0.042104	NM_025829.4	66892	Eif4e3	transcript	8.06038	15.9332	-0.98312	2.78e-05	0.0155632
XR_004934374.1	102635071	Gm26944	lncRNA	0.987437	0	Inf	0.00261628	0.0488316	mmu-miR-874-3p	67.1603	160.155	-1.1385	0.0024216	0.042104	NM_173866.4	108682	Gpt2	transcript	1.46859	5.47079	-1.89731	0.000818569	0.0276354
XR_004934374.1	102635071	Gm26944	lncRNA	0.987437	0	Inf	0.00261628	0.0488316	mmu-miR-874-3p	67.1603	160.155	-1.1385	0.0024216	0.042104	XM_006524674.5	56468	Socs5	transcript	2.99592	0.0603897	5.63255	0.000527102	0.0276354
XR_004934374.1	102635071	Gm26944	lncRNA	0.987437	0	Inf	0.00261628	0.0488316	mmu-miR-874-3p	67.1603	160.155	-1.1385	0.0024216	0.042104	XM_006517452.5	76577	Faf2	transcript	0.845375	0	Inf	0.000820671	0.0276354
XR_004934374.1	102635071	Gm26944	lncRNA	0.987437	0	Inf	0.00261628	0.0488316	mmu-miR-874-3p	67.1603	160.155	-1.1385	0.0024216	0.042104	NM_145605.2	234825	Klhdc4	transcript	1.15389	3.19303	-1.46842	0.000484263	0.0276354
XR_004934374.1	102635071	Gm26944	lncRNA	0.987437	0	Inf	0.00261628	0.0488316	mmu-miR-874-3p	67.1603	160.155	-1.1385	0.0024216	0.042104	NM_177322.3	11607	Agtr1a	transcript	16.509	9.02107	0.871884	1.52e-05	0.0155632
XR_004934374.1	102635071	Gm26944	lncRNA	0.987437	0	Inf	0.00261628	0.0488316	mmu-miR-874-3p	67.1603	160.155	-1.1385	0.0024216	0.042104	NM_007802.4	13038	Ctsk	transcript	3.1683	1.31973	1.26347	0.000832761	0.0278144
XR_004934374.1	102635071	Gm26944	lncRNA	0.987437	0	Inf	0.00261628	0.0488316	mmu-miR-874-3p	67.1603	160.155	-1.1385	0.0024216	0.042104	TCONS_00002486	68295	Aar2	transcript	1.18122	0	Inf	0.000820671	0.0276354
XR_004934374.1	102635071	Gm26944	lncRNA	0.987437	0	Inf	0.00261628	0.0488316	mmu-miR-874-3p	67.1603	160.155	-1.1385	0.0024216	0.042104	NM_001024606.2	382051	Pdp2	transcript	3.49019	6.43953	-0.883649	0.00130674	0.0342571
XR_004934374.1	102635071	Gm26944	lncRNA	0.987437	0	Inf	0.00261628	0.0488316	mmu-miR-874-3p	67.1603	160.155	-1.1385	0.0024216	0.042104	NM_001288613.1	245860	Atg9a	transcript	2.10893	0.14069	3.90593	0.000401703	0.0276354
XR_004934374.1	102635071	Gm26944	lncRNA	0.987437	0	Inf	0.00261628	0.0488316	mmu-miR-874-3p	67.1603	160.155	-1.1385	0.0024216	0.042104	XM_017317778.3	100502841	Epg5	transcript	0.826306	0.00611767	7.07755	0.000717464	0.0276354
XR_004934374.1	102635071	Gm26944	lncRNA	0.987437	0	Inf	0.00261628	0.0488316	mmu-miR-874-3p	67.1603	160.155	-1.1385	0.0024216	0.042104	NM_130449.2	140792	Colec12	transcript	3.99678	3.31964	0.26781	0.00250276	0.0477182
XR_004934374.1	102635071	Gm26944	lncRNA	0.987437	0	Inf	0.00261628	0.0488316	mmu-miR-874-3p	67.1603	160.155	-1.1385	0.0024216	0.042104	NM_001362722.1	74103	Nebl	transcript	26.0163	0	Inf	2.74e-05	0.0155632
XR_004934374.1	102635071	Gm26944	lncRNA	0.987437	0	Inf	0.00261628	0.0488316	mmu-miR-874-3p	67.1603	160.155	-1.1385	0.0024216	0.042104	NM_008664.2	17930	Myom2	transcript	424.854	190.825	1.15472	0.000145974	0.0276354
XR_004934374.1	102635071	Gm26944	lncRNA	0.987437	0	Inf	0.00261628	0.0488316	mmu-miR-874-3p	67.1603	160.155	-1.1385	0.0024216	0.042104	NM_146243.2	66713	Actr2	transcript	29.0525	22.8911	0.343875	0.00149481	0.0362404
XR_004934374.1	102635071	Gm26944	lncRNA	0.987437	0	Inf	0.00261628	0.0488316	mmu-miR-874-3p	67.1603	160.155	-1.1385	0.0024216	0.042104	XM_036157952.1	12908	Crat	transcript	3.05654	0	Inf	5.87e-05	0.0211184
XR_004934374.1	102635071	Gm26944	lncRNA	0.987437	0	Inf	0.00261628	0.0488316	mmu-miR-874-3p	67.1603	160.155	-1.1385	0.0024216	0.042104	NM_026582.5	68151	Wls	transcript	7.4038	5.38228	0.460048	0.000248241	0.0276354
XR_004934374.1	102635071	Gm26944	lncRNA	0.987437	0	Inf	0.00261628	0.0488316	mmu-miR-874-3p	67.1603	160.155	-1.1385	0.0024216	0.042104	NM_026524.4	68041	Mid1ip1	transcript	37.9267	30.3802	0.320079	0.000987289	0.0299274
XR_004934374.1	102635071	Gm26944	lncRNA	0.987437	0	Inf	0.00261628	0.0488316	mmu-miR-874-3p	67.1603	160.155	-1.1385	0.0024216	0.042104	XM_006538665.4	192185	Nadk	transcript	0.972007	0.0104583	6.53824	0.00196035	0.0413468
XR_004934374.1	102635071	Gm26944	lncRNA	0.987437	0	Inf	0.00261628	0.0488316	mmu-miR-874-3p	67.1603	160.155	-1.1385	0.0024216	0.042104	NM_008706.5	18104	Nqo1	transcript	44.8113	23.425	0.935811	0.000167384	0.0276354
XR_004934374.1	102635071	Gm26944	lncRNA	0.987437	0	Inf	0.00261628	0.0488316	mmu-miR-874-3p	67.1603	160.155	-1.1385	0.0024216	0.042104	NM_025557.1	66425	Pcp4l1	transcript	16.3196	50.2128	-1.62145	0.000300043	0.0276354
XR_004934374.1	102635071	Gm26944	lncRNA	0.987437	0	Inf	0.00261628	0.0488316	mmu-miR-874-3p	67.1603	160.155	-1.1385	0.0024216	0.042104	NM_175398.4	109050	Inka2	transcript	2.56575	7.08752	-1.4659	0.00255544	0.0482407
XR_004934374.1	102635071	Gm26944	lncRNA	0.987437	0	Inf	0.00261628	0.0488316	mmu-miR-874-3p	67.1603	160.155	-1.1385	0.0024216	0.042104	NM_001081242.2	70549	Tln2	transcript	2.63951	0.0295667	6.48015	0.000371777	0.0276354
XR_004934374.1	102635071	Gm26944	lncRNA	0.987437	0	Inf	0.00261628	0.0488316	mmu-miR-874-3p	67.1603	160.155	-1.1385	0.0024216	0.042104	XM_011239446.4	228026	Pdk1	transcript	3.2763	0	Inf	0.000820671	0.0276354
XR_004934374.1	102635071	Gm26944	lncRNA	0.987437	0	Inf	0.00261628	0.0488316	mmu-miR-874-3p	67.1603	160.155	-1.1385	0.0024216	0.042104	NM_011293.2	20022	Polr2j	transcript	13.2814	15.4381	-0.217088	0.000690938	0.0276354
XR_004934374.1	102635071	Gm26944	lncRNA	0.987437	0	Inf	0.00261628	0.0488316	mmu-miR-874-3p	67.1603	160.155	-1.1385	0.0024216	0.042104	TCONS_00021414	56637	Gsk3b	transcript	3.22604	0	Inf	0.000820671	0.0276354
XR_004934374.1	102635071	Gm26944	lncRNA	0.987437	0	Inf	0.00261628	0.0488316	mmu-miR-874-3p	67.1603	160.155	-1.1385	0.0024216	0.042104	NM_026443.4	67900	Mtfp1	transcript	27.5971	35.7028	-0.37152	0.000338742	0.0276354
XR_004934374.1	102635071	Gm26944	lncRNA	0.987437	0	Inf	0.00261628	0.0488316	mmu-miR-874-3p	67.1603	160.155	-1.1385	0.0024216	0.042104	NM_022891.3	65019	Rpl23	transcript	63.7671	68.7937	-0.109465	0.00161807	0.037419
XR_004934374.1	102635071	Gm26944	lncRNA	0.987437	0	Inf	0.00261628	0.0488316	mmu-miR-874-3p	67.1603	160.155	-1.1385	0.0024216	0.042104	NM_026824.4	68730	Dus1l	transcript	0	3.13193	#NAME?	0.000987532	0.0299274
XR_004934374.1	102635071	Gm26944	lncRNA	0.987437	0	Inf	0.00261628	0.0488316	mmu-miR-874-3p	67.1603	160.155	-1.1385	0.0024216	0.042104	NM_025600.2	66498	Dda1	transcript	5.91252	6.16339	-0.0599504	0.000969153	0.0297987
XR_004934374.1	102635071	Gm26944	lncRNA	0.987437	0	Inf	0.00261628	0.0488316	mmu-miR-874-3p	67.1603	160.155	-1.1385	0.0024216	0.042104	XM_006503677.4	11518	Add1	transcript	1.28784	0.00563833	7.83547	0.000849239	0.028103
XR_004934374.1	102635071	Gm26944	lncRNA	0.987437	0	Inf	0.00261628	0.0488316	mmu-miR-874-3p	67.1603	160.155	-1.1385	0.0024216	0.042104	NM_001013390.3	399548	Scn4b	transcript	2.15251	16.2847	-2.91942	0.00111032	0.0316263
XR_004934374.1	102635071	Gm26944	lncRNA	0.987437	0	Inf	0.00261628	0.0488316	mmu-miR-874-3p	67.1603	160.155	-1.1385	0.0024216	0.042104	TCONS_00022043	20656	Sod2	transcript	6.07359	0.19545	4.95768	0.0002461	0.0276354
XR_004934374.1	102635071	Gm26944	lncRNA	0.987437	0	Inf	0.00261628	0.0488316	mmu-miR-874-3p	67.1603	160.155	-1.1385	0.0024216	0.042104	XM_006515925.4	26932	Ppp2r5e	transcript	1.17794	0.258766	2.18654	0.000952025	0.0296311
XR_004934374.1	102635071	Gm26944	lncRNA	0.987437	0	Inf	0.00261628	0.0488316	mmu-miR-874-3p	67.1603	160.155	-1.1385	0.0024216	0.042104	NM_009634.6	11564	Adsl	transcript	8.39214	7.60029	0.142984	0.000689457	0.0276354
XR_004934374.1	102635071	Gm26944	lncRNA	0.987437	0	Inf	0.00261628	0.0488316	mmu-miR-874-3p	67.1603	160.155	-1.1385	0.0024216	0.042104	NM_177059.3	320027	Fstl4	transcript	2.66003	0	Inf	0.00041668	0.0276354
XR_004934374.1	102635071	Gm26944	lncRNA	0.987437	0	Inf	0.00261628	0.0488316	mmu-miR-874-3p	67.1603	160.155	-1.1385	0.0024216	0.042104	NM_008681.2	17988	Ndrg1	transcript	13.4879	7.27813	0.890022	0.00249471	0.0476436
XR_004934374.1	102635071	Gm26944	lncRNA	0.987437	0	Inf	0.00261628	0.0488316	mmu-miR-874-3p	67.1603	160.155	-1.1385	0.0024216	0.042104	NM_018743.4	102247	Gpat4	transcript	7.76624	6.97285	0.155467	0.00132739	0.0345061
XR_004934374.1	102635071	Gm26944	lncRNA	0.987437	0	Inf	0.00261628	0.0488316	mmu-miR-874-3p	67.1603	160.155	-1.1385	0.0024216	0.042104	NM_133702.3	68979	Nol11	transcript	5.69427	3.78451	0.589407	0.00138039	0.0351828
XR_004934374.1	102635071	Gm26944	lncRNA	0.987437	0	Inf	0.00261628	0.0488316	mmu-miR-874-3p	67.1603	160.155	-1.1385	0.0024216	0.042104	XM_030244718.2	78267	Klhdc8b	transcript	0.935272	0.0147827	5.98341	0.00120816	0.0332056
XR_004934374.1	102635071	Gm26944	lncRNA	0.987437	0	Inf	0.00261628	0.0488316	mmu-miR-874-3p	67.1603	160.155	-1.1385	0.0024216	0.042104	NM_001113408.2	16825	Ldb1	transcript	7.39907	6.99442	0.0811388	9.29e-05	0.0264941
XR_004934374.1	102635071	Gm26944	lncRNA	0.987437	0	Inf	0.00261628	0.0488316	mmu-miR-874-3p	67.1603	160.155	-1.1385	0.0024216	0.042104	NM_027113.2	69544	Wdr5b	transcript	2.3334	0.0822317	4.8266	0.00171747	0.0384046
XR_004934374.1	102635071	Gm26944	lncRNA	0.987437	0	Inf	0.00261628	0.0488316	mmu-miR-874-3p	67.1603	160.155	-1.1385	0.0024216	0.042104	NM_009647.5	11639	Ak4	transcript	3.29582	0.0275303	6.90347	0.00015385	0.0276354
XR_004934374.1	102635071	Gm26944	lncRNA	0.987437	0	Inf	0.00261628	0.0488316	mmu-miR-874-3p	67.1603	160.155	-1.1385	0.0024216	0.042104	XM_036165784.1	12321	Calu	transcript	10.5439	16.3948	-0.636826	0.00157708	0.0372453
XR_004934374.1	102635071	Gm26944	lncRNA	0.987437	0	Inf	0.00261628	0.0488316	mmu-miR-874-3p	67.1603	160.155	-1.1385	0.0024216	0.042104	NM_019694.2	56384	Letm1	transcript	5.73717	11.2145	-0.966953	0.000238425	0.0276354
XR_004934374.1	102635071	Gm26944	lncRNA	0.987437	0	Inf	0.00261628	0.0488316	mmu-miR-874-3p	67.1603	160.155	-1.1385	0.0024216	0.042104	NM_025828.3	66890	Lman2	transcript	13.183	13.5281	-0.0372866	0.00183952	0.0400109
XR_004934374.1	102635071	Gm26944	lncRNA	0.987437	0	Inf	0.00261628	0.0488316	mmu-miR-874-3p	67.1603	160.155	-1.1385	0.0024216	0.042104	NM_009710.4	11870	Art1	transcript	35.968	53.38	-0.569584	0.000340564	0.0276354
XR_004934374.1	102635071	Gm26944	lncRNA	0.987437	0	Inf	0.00261628	0.0488316	mmu-miR-874-3p	67.1603	160.155	-1.1385	0.0024216	0.042104	XM_036161439.1	14773	Grk5	transcript	3.29743	0	Inf	0.000145308	0.0276354
XR_004934374.1	102635071	Gm26944	lncRNA	0.987437	0	Inf	0.00261628	0.0488316	mmu-miR-874-3p	67.1603	160.155	-1.1385	0.0024216	0.042104	XM_036161998.1	241694	Ralgapa2	transcript	4.94291	0.169671	4.86455	0.000222044	0.0276354
XR_004934374.1	102635071	Gm26944	lncRNA	0.987437	0	Inf	0.00261628	0.0488316	mmu-miR-874-3p	67.1603	160.155	-1.1385	0.0024216	0.042104	NM_175236.5	76187	Adhfe1	transcript	5.22125	5.88058	-0.171562	0.00131045	0.0342571
XR_004934374.1	102635071	Gm26944	lncRNA	0.987437	0	Inf	0.00261628	0.0488316	mmu-miR-874-3p	67.1603	160.155	-1.1385	0.0024216	0.042104	TCONS_00022742	30957	Mapk8ip3	transcript	0.033413	2.79614	-6.38688	0.000274522	0.0276354
XR_004934374.1	102635071	Gm26944	lncRNA	0.987437	0	Inf	0.00261628	0.0488316	mmu-miR-874-3p	67.1603	160.155	-1.1385	0.0024216	0.042104	NM_001012477.2	20315	Cxcl12	transcript	8.72303	23.6765	-1.44055	0.000741939	0.0276354
XR_004934374.1	102635071	Gm26944	lncRNA	0.987437	0	Inf	0.00261628	0.0488316	mmu-miR-874-3p	67.1603	160.155	-1.1385	0.0024216	0.042104	NM_024214.2	67952	Tomm20	transcript	10.2066	7.84903	0.378922	0.000773909	0.0276354
XR_004934374.1	102635071	Gm26944	lncRNA	0.987437	0	Inf	0.00261628	0.0488316	mmu-miR-874-3p	67.1603	160.155	-1.1385	0.0024216	0.042104	XM_006518707.3	19056	Ppp3cb	transcript	0.007019	4.54103	-9.33754	0.00110514	0.0316263
XR_004934374.1	102635071	Gm26944	lncRNA	0.987437	0	Inf	0.00261628	0.0488316	mmu-miR-874-3p	67.1603	160.155	-1.1385	0.0024216	0.042104	NM_025407.2	22273	Uqcrc1	transcript	305.19	377.485	-0.306711	0.000478795	0.0276354
XR_004934374.1	102635071	Gm26944	lncRNA	0.987437	0	Inf	0.00261628	0.0488316	mmu-miR-874-3p	67.1603	160.155	-1.1385	0.0024216	0.042104	NM_001013024.2	72607	Usp13	transcript	43.9871	44.7173	-0.0237507	0.000631592	0.0276354
XR_004934374.1	102635071	Gm26944	lncRNA	0.987437	0	Inf	0.00261628	0.0488316	mmu-miR-874-3p	67.1603	160.155	-1.1385	0.0024216	0.042104	TCONS_00014905	216161	Sbno2	transcript	4.64735	3.20414	0.536473	0.00139977	0.0352728
XR_004934374.1	102635071	Gm26944	lncRNA	0.987437	0	Inf	0.00261628	0.0488316	mmu-miR-874-3p	67.1603	160.155	-1.1385	0.0024216	0.042104	NM_001115132.2	52683	Ncaph2	transcript	3.1926	0.540685	2.56187	0.00108613	0.0314517
XR_004934374.1	102635071	Gm26944	lncRNA	0.987437	0	Inf	0.00261628	0.0488316	mmu-miR-874-3p	67.1603	160.155	-1.1385	0.0024216	0.042104	NM_008338.4	15980	Ifngr2	transcript	40.1831	60.2437	-0.584221	7.98e-05	0.0253471
XR_004934374.1	102635071	Gm26944	lncRNA	0.987437	0	Inf	0.00261628	0.0488316	mmu-miR-874-3p	67.1603	160.155	-1.1385	0.0024216	0.042104	XM_036156491.1	20787	Srebf1	transcript	2.73364	0.07479	5.19183	7.86e-05	0.0253471
XR_004934374.1	102635071	Gm26944	lncRNA	0.987437	0	Inf	0.00261628	0.0488316	mmu-miR-874-3p	67.1603	160.155	-1.1385	0.0024216	0.042104	NM_008688.3	18029	Nfic	transcript	4.59623	14.0914	-1.61629	0.00200236	0.0419257
XR_004934374.1	102635071	Gm26944	lncRNA	0.987437	0	Inf	0.00261628	0.0488316	mmu-miR-874-3p	67.1603	160.155	-1.1385	0.0024216	0.042104	XM_036165926.1	18575	Pde1c	transcript	2.25441	0.005907	8.57611	0.000698786	0.0276354
XR_004934374.1	102635071	Gm26944	lncRNA	0.987437	0	Inf	0.00261628	0.0488316	mmu-miR-874-3p	67.1603	160.155	-1.1385	0.0024216	0.042104	XM_006505459.3	12444	Ccnd2	transcript	3.84378	0.0527657	6.18678	0.000467463	0.0276354
XR_004934374.1	102635071	Gm26944	lncRNA	0.987437	0	Inf	0.00261628	0.0488316	mmu-miR-874-3p	67.1603	160.155	-1.1385	0.0024216	0.042104	XM_036156605.1	217331	Unk	transcript	0.843465	0	Inf	0.000820671	0.0276354
XR_004934374.1	102635071	Gm26944	lncRNA	0.987437	0	Inf	0.00261628	0.0488316	mmu-miR-874-3p	67.1603	160.155	-1.1385	0.0024216	0.042104	NM_001169577.1	22214	Ube2h	transcript	1.41218	0.0643033	4.45689	0.00189306	0.0407486
XR_004934374.1	102635071	Gm26944	lncRNA	0.987437	0	Inf	0.00261628	0.0488316	mmu-miR-874-3p	67.1603	160.155	-1.1385	0.0024216	0.042104	NM_027727.3	69190	Dym	transcript	21.0629	19.308	0.125505	0.00123487	0.0335637
TCONS_00004800	118449	Synpo2	lncRNA	1.0568	0	Inf	0.000820671	0.0276354	mmu-miR-874-3p	67.1603	160.155	-1.1385	0.0024216	0.042104	NM_054046.5	23854	Def8	transcript	8.18934	6.47494	0.33888	0.0016116	0.037419
TCONS_00004800	118449	Synpo2	lncRNA	1.0568	0	Inf	0.000820671	0.0276354	mmu-miR-874-3p	67.1603	160.155	-1.1385	0.0024216	0.042104	XM_006534391.5	75580	Zbtb4	transcript	1.27003	0	Inf	0.000820671	0.0276354
TCONS_00004800	118449	Synpo2	lncRNA	1.0568	0	Inf	0.000820671	0.0276354	mmu-miR-874-3p	67.1603	160.155	-1.1385	0.0024216	0.042104	NM_153080.3	216810	Tom1l2	transcript	1.13139	0.017205	6.03913	0.00117465	0.0326745
TCONS_00004800	118449	Synpo2	lncRNA	1.0568	0	Inf	0.000820671	0.0276354	mmu-miR-874-3p	67.1603	160.155	-1.1385	0.0024216	0.042104	NM_011838.4	23936	Lynx1	transcript	25.7672	40.3626	-0.647487	0.000722116	0.0276354
TCONS_00004800	118449	Synpo2	lncRNA	1.0568	0	Inf	0.000820671	0.0276354	mmu-miR-874-3p	67.1603	160.155	-1.1385	0.0024216	0.042104	NM_001098225.2	11496	Adam22	transcript	2.58778	0.00525567	8.94362	2.29e-06	0.0151166
TCONS_00004800	118449	Synpo2	lncRNA	1.0568	0	Inf	0.000820671	0.0276354	mmu-miR-874-3p	67.1603	160.155	-1.1385	0.0024216	0.042104	XM_030253061.2	100273	Osbpl9	transcript	0.913933	0	Inf	0.000964603	0.0297987
TCONS_00004800	118449	Synpo2	lncRNA	1.0568	0	Inf	0.000820671	0.0276354	mmu-miR-874-3p	67.1603	160.155	-1.1385	0.0024216	0.042104	TCONS_00020016	65246	Xpo7	transcript	4.13029	0.00722533	9.15896	0.00116536	0.0326432
TCONS_00004800	118449	Synpo2	lncRNA	1.0568	0	Inf	0.000820671	0.0276354	mmu-miR-874-3p	67.1603	160.155	-1.1385	0.0024216	0.042104	TCONS_00023739	76594	Dnajc18	transcript	1.93372	0	Inf	0.000820671	0.0276354
TCONS_00004800	118449	Synpo2	lncRNA	1.0568	0	Inf	0.000820671	0.0276354	mmu-miR-874-3p	67.1603	160.155	-1.1385	0.0024216	0.042104	TCONS_00006799	68303	Fam114a1	transcript	0.995193	0	Inf	0.000820671	0.0276354
TCONS_00004800	118449	Synpo2	lncRNA	1.0568	0	Inf	0.000820671	0.0276354	mmu-miR-874-3p	67.1603	160.155	-1.1385	0.0024216	0.042104	NM_172925.2	244923	Klhl31	transcript	25.7365	28.473	-0.145783	0.00102428	0.0304533
TCONS_00004800	118449	Synpo2	lncRNA	1.0568	0	Inf	0.000820671	0.0276354	mmu-miR-874-3p	67.1603	160.155	-1.1385	0.0024216	0.042104	NM_001347446.1	94089	Trim7	transcript	1.16147	7.15854	-2.62371	0.00045152	0.0276354
TCONS_00004800	118449	Synpo2	lncRNA	1.0568	0	Inf	0.000820671	0.0276354	mmu-miR-874-3p	67.1603	160.155	-1.1385	0.0024216	0.042104	NM_009818.1	12385	Ctnna1	transcript	89.2245	90.2244	-0.0160775	0.000857497	0.0281337
TCONS_00004800	118449	Synpo2	lncRNA	1.0568	0	Inf	0.000820671	0.0276354	mmu-miR-874-3p	67.1603	160.155	-1.1385	0.0024216	0.042104	NM_001355755.1	17896	Myl4	transcript	9.13829	0.191058	5.57984	0.00178945	0.0391774
TCONS_00004800	118449	Synpo2	lncRNA	1.0568	0	Inf	0.000820671	0.0276354	mmu-miR-874-3p	67.1603	160.155	-1.1385	0.0024216	0.042104	XM_036154088.1	319518	Pdpr	transcript	1.61977	3.72043	-1.19968	0.000122455	0.0276354
TCONS_00004800	118449	Synpo2	lncRNA	1.0568	0	Inf	0.000820671	0.0276354	mmu-miR-874-3p	67.1603	160.155	-1.1385	0.0024216	0.042104	XM_030246370.1	72729	Cdc42se2	transcript	1.75393	0.133176	3.71919	3e-05	0.0155632
TCONS_00004800	118449	Synpo2	lncRNA	1.0568	0	Inf	0.000820671	0.0276354	mmu-miR-874-3p	67.1603	160.155	-1.1385	0.0024216	0.042104	NM_016709.2	11992	Auh	transcript	23.1108	25.9264	-0.165855	0.00124159	0.0335637
TCONS_00004800	118449	Synpo2	lncRNA	1.0568	0	Inf	0.000820671	0.0276354	mmu-miR-874-3p	67.1603	160.155	-1.1385	0.0024216	0.042104	TCONS_00022612	225049	Ttc7	transcript	1.28356	2.38495	-0.893809	1.15e-05	0.0155632
TCONS_00004800	118449	Synpo2	lncRNA	1.0568	0	Inf	0.000820671	0.0276354	mmu-miR-874-3p	67.1603	160.155	-1.1385	0.0024216	0.042104	XM_006517134.5	18193	Nsd1	transcript	1.9852	0.448937	2.1447	0.00060106	0.0276354
TCONS_00004800	118449	Synpo2	lncRNA	1.0568	0	Inf	0.000820671	0.0276354	mmu-miR-874-3p	67.1603	160.155	-1.1385	0.0024216	0.042104	TCONS_00001035	21961	Tns1	transcript	39.6786	2.46049	4.01134	0.00031257	0.0276354
TCONS_00004800	118449	Synpo2	lncRNA	1.0568	0	Inf	0.000820671	0.0276354	mmu-miR-874-3p	67.1603	160.155	-1.1385	0.0024216	0.042104	NM_011207.2	545622	Ptpn3	transcript	2.85143	0.047324	5.91297	0.000765875	0.0276354
TCONS_00004800	118449	Synpo2	lncRNA	1.0568	0	Inf	0.000820671	0.0276354	mmu-miR-874-3p	67.1603	160.155	-1.1385	0.0024216	0.042104	XM_030255147.2	381290	Atp2b4	transcript	1.79149	0	Inf	0.000233871	0.0276354
TCONS_00004800	118449	Synpo2	lncRNA	1.0568	0	Inf	0.000820671	0.0276354	mmu-miR-874-3p	67.1603	160.155	-1.1385	0.0024216	0.042104	TCONS_00017675	68519	Eml1	transcript	11.0496	10.9045	0.0190772	0.00239943	0.0465183
TCONS_00004800	118449	Synpo2	lncRNA	1.0568	0	Inf	0.000820671	0.0276354	mmu-miR-874-3p	67.1603	160.155	-1.1385	0.0024216	0.042104	NM_177411.4	19344	Rab5b	transcript	15.3906	17.862	-0.214852	0.000321654	0.0276354
TCONS_00004800	118449	Synpo2	lncRNA	1.0568	0	Inf	0.000820671	0.0276354	mmu-miR-874-3p	67.1603	160.155	-1.1385	0.0024216	0.042104	NM_023317.2	67203	Nde1	transcript	1.95862	4.78075	-1.2874	2.29e-05	0.0155632
TCONS_00004800	118449	Synpo2	lncRNA	1.0568	0	Inf	0.000820671	0.0276354	mmu-miR-874-3p	67.1603	160.155	-1.1385	0.0024216	0.042104	NM_025829.4	66892	Eif4e3	transcript	8.06038	15.9332	-0.98312	2.78e-05	0.0155632
TCONS_00004800	118449	Synpo2	lncRNA	1.0568	0	Inf	0.000820671	0.0276354	mmu-miR-874-3p	67.1603	160.155	-1.1385	0.0024216	0.042104	NM_173866.4	108682	Gpt2	transcript	1.46859	5.47079	-1.89731	0.000818569	0.0276354
TCONS_00004800	118449	Synpo2	lncRNA	1.0568	0	Inf	0.000820671	0.0276354	mmu-miR-874-3p	67.1603	160.155	-1.1385	0.0024216	0.042104	XM_006524674.5	56468	Socs5	transcript	2.99592	0.0603897	5.63255	0.000527102	0.0276354
TCONS_00004800	118449	Synpo2	lncRNA	1.0568	0	Inf	0.000820671	0.0276354	mmu-miR-874-3p	67.1603	160.155	-1.1385	0.0024216	0.042104	XM_006517452.5	76577	Faf2	transcript	0.845375	0	Inf	0.000820671	0.0276354
TCONS_00004800	118449	Synpo2	lncRNA	1.0568	0	Inf	0.000820671	0.0276354	mmu-miR-874-3p	67.1603	160.155	-1.1385	0.0024216	0.042104	NM_145605.2	234825	Klhdc4	transcript	1.15389	3.19303	-1.46842	0.000484263	0.0276354
TCONS_00004800	118449	Synpo2	lncRNA	1.0568	0	Inf	0.000820671	0.0276354	mmu-miR-874-3p	67.1603	160.155	-1.1385	0.0024216	0.042104	NM_177322.3	11607	Agtr1a	transcript	16.509	9.02107	0.871884	1.52e-05	0.0155632
TCONS_00004800	118449	Synpo2	lncRNA	1.0568	0	Inf	0.000820671	0.0276354	mmu-miR-874-3p	67.1603	160.155	-1.1385	0.0024216	0.042104	NM_007802.4	13038	Ctsk	transcript	3.1683	1.31973	1.26347	0.000832761	0.0278144
TCONS_00004800	118449	Synpo2	lncRNA	1.0568	0	Inf	0.000820671	0.0276354	mmu-miR-874-3p	67.1603	160.155	-1.1385	0.0024216	0.042104	TCONS_00002486	68295	Aar2	transcript	1.18122	0	Inf	0.000820671	0.0276354
TCONS_00004800	118449	Synpo2	lncRNA	1.0568	0	Inf	0.000820671	0.0276354	mmu-miR-874-3p	67.1603	160.155	-1.1385	0.0024216	0.042104	NM_001024606.2	382051	Pdp2	transcript	3.49019	6.43953	-0.883649	0.00130674	0.0342571
TCONS_00004800	118449	Synpo2	lncRNA	1.0568	0	Inf	0.000820671	0.0276354	mmu-miR-874-3p	67.1603	160.155	-1.1385	0.0024216	0.042104	NM_001288613.1	245860	Atg9a	transcript	2.10893	0.14069	3.90593	0.000401703	0.0276354
TCONS_00004800	118449	Synpo2	lncRNA	1.0568	0	Inf	0.000820671	0.0276354	mmu-miR-874-3p	67.1603	160.155	-1.1385	0.0024216	0.042104	XM_017317778.3	100502841	Epg5	transcript	0.826306	0.00611767	7.07755	0.000717464	0.0276354
TCONS_00004800	118449	Synpo2	lncRNA	1.0568	0	Inf	0.000820671	0.0276354	mmu-miR-874-3p	67.1603	160.155	-1.1385	0.0024216	0.042104	NM_130449.2	140792	Colec12	transcript	3.99678	3.31964	0.26781	0.00250276	0.0477182
TCONS_00004800	118449	Synpo2	lncRNA	1.0568	0	Inf	0.000820671	0.0276354	mmu-miR-874-3p	67.1603	160.155	-1.1385	0.0024216	0.042104	NM_001362722.1	74103	Nebl	transcript	26.0163	0	Inf	2.74e-05	0.0155632
TCONS_00004800	118449	Synpo2	lncRNA	1.0568	0	Inf	0.000820671	0.0276354	mmu-miR-874-3p	67.1603	160.155	-1.1385	0.0024216	0.042104	NM_008664.2	17930	Myom2	transcript	424.854	190.825	1.15472	0.000145974	0.0276354
TCONS_00004800	118449	Synpo2	lncRNA	1.0568	0	Inf	0.000820671	0.0276354	mmu-miR-874-3p	67.1603	160.155	-1.1385	0.0024216	0.042104	NM_146243.2	66713	Actr2	transcript	29.0525	22.8911	0.343875	0.00149481	0.0362404
TCONS_00004800	118449	Synpo2	lncRNA	1.0568	0	Inf	0.000820671	0.0276354	mmu-miR-874-3p	67.1603	160.155	-1.1385	0.0024216	0.042104	XM_036157952.1	12908	Crat	transcript	3.05654	0	Inf	5.87e-05	0.0211184
TCONS_00004800	118449	Synpo2	lncRNA	1.0568	0	Inf	0.000820671	0.0276354	mmu-miR-874-3p	67.1603	160.155	-1.1385	0.0024216	0.042104	NM_026582.5	68151	Wls	transcript	7.4038	5.38228	0.460048	0.000248241	0.0276354
TCONS_00004800	118449	Synpo2	lncRNA	1.0568	0	Inf	0.000820671	0.0276354	mmu-miR-874-3p	67.1603	160.155	-1.1385	0.0024216	0.042104	NM_026524.4	68041	Mid1ip1	transcript	37.9267	30.3802	0.320079	0.000987289	0.0299274
TCONS_00004800	118449	Synpo2	lncRNA	1.0568	0	Inf	0.000820671	0.0276354	mmu-miR-874-3p	67.1603	160.155	-1.1385	0.0024216	0.042104	XM_006538665.4	192185	Nadk	transcript	0.972007	0.0104583	6.53824	0.00196035	0.0413468
TCONS_00004800	118449	Synpo2	lncRNA	1.0568	0	Inf	0.000820671	0.0276354	mmu-miR-874-3p	67.1603	160.155	-1.1385	0.0024216	0.042104	NM_008706.5	18104	Nqo1	transcript	44.8113	23.425	0.935811	0.000167384	0.0276354
TCONS_00004800	118449	Synpo2	lncRNA	1.0568	0	Inf	0.000820671	0.0276354	mmu-miR-874-3p	67.1603	160.155	-1.1385	0.0024216	0.042104	NM_025557.1	66425	Pcp4l1	transcript	16.3196	50.2128	-1.62145	0.000300043	0.0276354
TCONS_00004800	118449	Synpo2	lncRNA	1.0568	0	Inf	0.000820671	0.0276354	mmu-miR-874-3p	67.1603	160.155	-1.1385	0.0024216	0.042104	NM_175398.4	109050	Inka2	transcript	2.56575	7.08752	-1.4659	0.00255544	0.0482407
TCONS_00004800	118449	Synpo2	lncRNA	1.0568	0	Inf	0.000820671	0.0276354	mmu-miR-874-3p	67.1603	160.155	-1.1385	0.0024216	0.042104	NM_001081242.2	70549	Tln2	transcript	2.63951	0.0295667	6.48015	0.000371777	0.0276354
TCONS_00004800	118449	Synpo2	lncRNA	1.0568	0	Inf	0.000820671	0.0276354	mmu-miR-874-3p	67.1603	160.155	-1.1385	0.0024216	0.042104	XM_011239446.4	228026	Pdk1	transcript	3.2763	0	Inf	0.000820671	0.0276354
TCONS_00004800	118449	Synpo2	lncRNA	1.0568	0	Inf	0.000820671	0.0276354	mmu-miR-874-3p	67.1603	160.155	-1.1385	0.0024216	0.042104	NM_011293.2	20022	Polr2j	transcript	13.2814	15.4381	-0.217088	0.000690938	0.0276354
TCONS_00004800	118449	Synpo2	lncRNA	1.0568	0	Inf	0.000820671	0.0276354	mmu-miR-874-3p	67.1603	160.155	-1.1385	0.0024216	0.042104	TCONS_00021414	56637	Gsk3b	transcript	3.22604	0	Inf	0.000820671	0.0276354
TCONS_00004800	118449	Synpo2	lncRNA	1.0568	0	Inf	0.000820671	0.0276354	mmu-miR-874-3p	67.1603	160.155	-1.1385	0.0024216	0.042104	NM_026443.4	67900	Mtfp1	transcript	27.5971	35.7028	-0.37152	0.000338742	0.0276354
TCONS_00004800	118449	Synpo2	lncRNA	1.0568	0	Inf	0.000820671	0.0276354	mmu-miR-874-3p	67.1603	160.155	-1.1385	0.0024216	0.042104	NM_022891.3	65019	Rpl23	transcript	63.7671	68.7937	-0.109465	0.00161807	0.037419
TCONS_00004800	118449	Synpo2	lncRNA	1.0568	0	Inf	0.000820671	0.0276354	mmu-miR-874-3p	67.1603	160.155	-1.1385	0.0024216	0.042104	NM_026824.4	68730	Dus1l	transcript	0	3.13193	#NAME?	0.000987532	0.0299274
TCONS_00004800	118449	Synpo2	lncRNA	1.0568	0	Inf	0.000820671	0.0276354	mmu-miR-874-3p	67.1603	160.155	-1.1385	0.0024216	0.042104	NM_025600.2	66498	Dda1	transcript	5.91252	6.16339	-0.0599504	0.000969153	0.0297987
TCONS_00004800	118449	Synpo2	lncRNA	1.0568	0	Inf	0.000820671	0.0276354	mmu-miR-874-3p	67.1603	160.155	-1.1385	0.0024216	0.042104	XM_006503677.4	11518	Add1	transcript	1.28784	0.00563833	7.83547	0.000849239	0.028103
TCONS_00004800	118449	Synpo2	lncRNA	1.0568	0	Inf	0.000820671	0.0276354	mmu-miR-874-3p	67.1603	160.155	-1.1385	0.0024216	0.042104	NM_001013390.3	399548	Scn4b	transcript	2.15251	16.2847	-2.91942	0.00111032	0.0316263
TCONS_00004800	118449	Synpo2	lncRNA	1.0568	0	Inf	0.000820671	0.0276354	mmu-miR-874-3p	67.1603	160.155	-1.1385	0.0024216	0.042104	TCONS_00022043	20656	Sod2	transcript	6.07359	0.19545	4.95768	0.0002461	0.0276354
TCONS_00004800	118449	Synpo2	lncRNA	1.0568	0	Inf	0.000820671	0.0276354	mmu-miR-874-3p	67.1603	160.155	-1.1385	0.0024216	0.042104	XM_006515925.4	26932	Ppp2r5e	transcript	1.17794	0.258766	2.18654	0.000952025	0.0296311
TCONS_00004800	118449	Synpo2	lncRNA	1.0568	0	Inf	0.000820671	0.0276354	mmu-miR-874-3p	67.1603	160.155	-1.1385	0.0024216	0.042104	NM_009634.6	11564	Adsl	transcript	8.39214	7.60029	0.142984	0.000689457	0.0276354
TCONS_00004800	118449	Synpo2	lncRNA	1.0568	0	Inf	0.000820671	0.0276354	mmu-miR-874-3p	67.1603	160.155	-1.1385	0.0024216	0.042104	NM_177059.3	320027	Fstl4	transcript	2.66003	0	Inf	0.00041668	0.0276354
TCONS_00004800	118449	Synpo2	lncRNA	1.0568	0	Inf	0.000820671	0.0276354	mmu-miR-874-3p	67.1603	160.155	-1.1385	0.0024216	0.042104	NM_008681.2	17988	Ndrg1	transcript	13.4879	7.27813	0.890022	0.00249471	0.0476436
TCONS_00004800	118449	Synpo2	lncRNA	1.0568	0	Inf	0.000820671	0.0276354	mmu-miR-874-3p	67.1603	160.155	-1.1385	0.0024216	0.042104	NM_018743.4	102247	Gpat4	transcript	7.76624	6.97285	0.155467	0.00132739	0.0345061
TCONS_00004800	118449	Synpo2	lncRNA	1.0568	0	Inf	0.000820671	0.0276354	mmu-miR-874-3p	67.1603	160.155	-1.1385	0.0024216	0.042104	NM_133702.3	68979	Nol11	transcript	5.69427	3.78451	0.589407	0.00138039	0.0351828
TCONS_00004800	118449	Synpo2	lncRNA	1.0568	0	Inf	0.000820671	0.0276354	mmu-miR-874-3p	67.1603	160.155	-1.1385	0.0024216	0.042104	XM_030244718.2	78267	Klhdc8b	transcript	0.935272	0.0147827	5.98341	0.00120816	0.0332056
TCONS_00004800	118449	Synpo2	lncRNA	1.0568	0	Inf	0.000820671	0.0276354	mmu-miR-874-3p	67.1603	160.155	-1.1385	0.0024216	0.042104	NM_001113408.2	16825	Ldb1	transcript	7.39907	6.99442	0.0811388	9.29e-05	0.0264941
TCONS_00004800	118449	Synpo2	lncRNA	1.0568	0	Inf	0.000820671	0.0276354	mmu-miR-874-3p	67.1603	160.155	-1.1385	0.0024216	0.042104	NM_027113.2	69544	Wdr5b	transcript	2.3334	0.0822317	4.8266	0.00171747	0.0384046
TCONS_00004800	118449	Synpo2	lncRNA	1.0568	0	Inf	0.000820671	0.0276354	mmu-miR-874-3p	67.1603	160.155	-1.1385	0.0024216	0.042104	NM_009647.5	11639	Ak4	transcript	3.29582	0.0275303	6.90347	0.00015385	0.0276354
TCONS_00004800	118449	Synpo2	lncRNA	1.0568	0	Inf	0.000820671	0.0276354	mmu-miR-874-3p	67.1603	160.155	-1.1385	0.0024216	0.042104	XM_036165784.1	12321	Calu	transcript	10.5439	16.3948	-0.636826	0.00157708	0.0372453
TCONS_00004800	118449	Synpo2	lncRNA	1.0568	0	Inf	0.000820671	0.0276354	mmu-miR-874-3p	67.1603	160.155	-1.1385	0.0024216	0.042104	NM_019694.2	56384	Letm1	transcript	5.73717	11.2145	-0.966953	0.000238425	0.0276354
TCONS_00004800	118449	Synpo2	lncRNA	1.0568	0	Inf	0.000820671	0.0276354	mmu-miR-874-3p	67.1603	160.155	-1.1385	0.0024216	0.042104	NM_025828.3	66890	Lman2	transcript	13.183	13.5281	-0.0372866	0.00183952	0.0400109
TCONS_00004800	118449	Synpo2	lncRNA	1.0568	0	Inf	0.000820671	0.0276354	mmu-miR-874-3p	67.1603	160.155	-1.1385	0.0024216	0.042104	NM_009710.4	11870	Art1	transcript	35.968	53.38	-0.569584	0.000340564	0.0276354
TCONS_00004800	118449	Synpo2	lncRNA	1.0568	0	Inf	0.000820671	0.0276354	mmu-miR-874-3p	67.1603	160.155	-1.1385	0.0024216	0.042104	XM_036161439.1	14773	Grk5	transcript	3.29743	0	Inf	0.000145308	0.0276354
TCONS_00004800	118449	Synpo2	lncRNA	1.0568	0	Inf	0.000820671	0.0276354	mmu-miR-874-3p	67.1603	160.155	-1.1385	0.0024216	0.042104	XM_036161998.1	241694	Ralgapa2	transcript	4.94291	0.169671	4.86455	0.000222044	0.0276354
TCONS_00004800	118449	Synpo2	lncRNA	1.0568	0	Inf	0.000820671	0.0276354	mmu-miR-874-3p	67.1603	160.155	-1.1385	0.0024216	0.042104	NM_175236.5	76187	Adhfe1	transcript	5.22125	5.88058	-0.171562	0.00131045	0.0342571
TCONS_00004800	118449	Synpo2	lncRNA	1.0568	0	Inf	0.000820671	0.0276354	mmu-miR-874-3p	67.1603	160.155	-1.1385	0.0024216	0.042104	TCONS_00022742	30957	Mapk8ip3	transcript	0.033413	2.79614	-6.38688	0.000274522	0.0276354
TCONS_00004800	118449	Synpo2	lncRNA	1.0568	0	Inf	0.000820671	0.0276354	mmu-miR-874-3p	67.1603	160.155	-1.1385	0.0024216	0.042104	NM_001012477.2	20315	Cxcl12	transcript	8.72303	23.6765	-1.44055	0.000741939	0.0276354
TCONS_00004800	118449	Synpo2	lncRNA	1.0568	0	Inf	0.000820671	0.0276354	mmu-miR-874-3p	67.1603	160.155	-1.1385	0.0024216	0.042104	NM_024214.2	67952	Tomm20	transcript	10.2066	7.84903	0.378922	0.000773909	0.0276354
TCONS_00004800	118449	Synpo2	lncRNA	1.0568	0	Inf	0.000820671	0.0276354	mmu-miR-874-3p	67.1603	160.155	-1.1385	0.0024216	0.042104	XM_006518707.3	19056	Ppp3cb	transcript	0.007019	4.54103	-9.33754	0.00110514	0.0316263
TCONS_00004800	118449	Synpo2	lncRNA	1.0568	0	Inf	0.000820671	0.0276354	mmu-miR-874-3p	67.1603	160.155	-1.1385	0.0024216	0.042104	NM_025407.2	22273	Uqcrc1	transcript	305.19	377.485	-0.306711	0.000478795	0.0276354
TCONS_00004800	118449	Synpo2	lncRNA	1.0568	0	Inf	0.000820671	0.0276354	mmu-miR-874-3p	67.1603	160.155	-1.1385	0.0024216	0.042104	NM_001013024.2	72607	Usp13	transcript	43.9871	44.7173	-0.0237507	0.000631592	0.0276354
TCONS_00004800	118449	Synpo2	lncRNA	1.0568	0	Inf	0.000820671	0.0276354	mmu-miR-874-3p	67.1603	160.155	-1.1385	0.0024216	0.042104	TCONS_00014905	216161	Sbno2	transcript	4.64735	3.20414	0.536473	0.00139977	0.0352728
TCONS_00004800	118449	Synpo2	lncRNA	1.0568	0	Inf	0.000820671	0.0276354	mmu-miR-874-3p	67.1603	160.155	-1.1385	0.0024216	0.042104	NM_001115132.2	52683	Ncaph2	transcript	3.1926	0.540685	2.56187	0.00108613	0.0314517
TCONS_00004800	118449	Synpo2	lncRNA	1.0568	0	Inf	0.000820671	0.0276354	mmu-miR-874-3p	67.1603	160.155	-1.1385	0.0024216	0.042104	NM_008338.4	15980	Ifngr2	transcript	40.1831	60.2437	-0.584221	7.98e-05	0.0253471
TCONS_00004800	118449	Synpo2	lncRNA	1.0568	0	Inf	0.000820671	0.0276354	mmu-miR-874-3p	67.1603	160.155	-1.1385	0.0024216	0.042104	XM_036156491.1	20787	Srebf1	transcript	2.73364	0.07479	5.19183	7.86e-05	0.0253471
TCONS_00004800	118449	Synpo2	lncRNA	1.0568	0	Inf	0.000820671	0.0276354	mmu-miR-874-3p	67.1603	160.155	-1.1385	0.0024216	0.042104	NM_008688.3	18029	Nfic	transcript	4.59623	14.0914	-1.61629	0.00200236	0.0419257
TCONS_00004800	118449	Synpo2	lncRNA	1.0568	0	Inf	0.000820671	0.0276354	mmu-miR-874-3p	67.1603	160.155	-1.1385	0.0024216	0.042104	XM_036165926.1	18575	Pde1c	transcript	2.25441	0.005907	8.57611	0.000698786	0.0276354
TCONS_00004800	118449	Synpo2	lncRNA	1.0568	0	Inf	0.000820671	0.0276354	mmu-miR-874-3p	67.1603	160.155	-1.1385	0.0024216	0.042104	XM_006505459.3	12444	Ccnd2	transcript	3.84378	0.0527657	6.18678	0.000467463	0.0276354
TCONS_00004800	118449	Synpo2	lncRNA	1.0568	0	Inf	0.000820671	0.0276354	mmu-miR-874-3p	67.1603	160.155	-1.1385	0.0024216	0.042104	XM_036156605.1	217331	Unk	transcript	0.843465	0	Inf	0.000820671	0.0276354
TCONS_00004800	118449	Synpo2	lncRNA	1.0568	0	Inf	0.000820671	0.0276354	mmu-miR-874-3p	67.1603	160.155	-1.1385	0.0024216	0.042104	NM_001169577.1	22214	Ube2h	transcript	1.41218	0.0643033	4.45689	0.00189306	0.0407486
TCONS_00004800	118449	Synpo2	lncRNA	1.0568	0	Inf	0.000820671	0.0276354	mmu-miR-874-3p	67.1603	160.155	-1.1385	0.0024216	0.042104	NM_027727.3	69190	Dym	transcript	21.0629	19.308	0.125505	0.00123487	0.0335637
NR_002864.2	353342	Peg13	lncRNA	14.1695	9.88702	0.519179	0.00219868	0.0438821	mmu-miR-874-3p	67.1603	160.155	-1.1385	0.0024216	0.042104	NM_054046.5	23854	Def8	transcript	8.18934	6.47494	0.33888	0.0016116	0.037419
NR_002864.2	353342	Peg13	lncRNA	14.1695	9.88702	0.519179	0.00219868	0.0438821	mmu-miR-874-3p	67.1603	160.155	-1.1385	0.0024216	0.042104	XM_006534391.5	75580	Zbtb4	transcript	1.27003	0	Inf	0.000820671	0.0276354
NR_002864.2	353342	Peg13	lncRNA	14.1695	9.88702	0.519179	0.00219868	0.0438821	mmu-miR-874-3p	67.1603	160.155	-1.1385	0.0024216	0.042104	NM_153080.3	216810	Tom1l2	transcript	1.13139	0.017205	6.03913	0.00117465	0.0326745
NR_002864.2	353342	Peg13	lncRNA	14.1695	9.88702	0.519179	0.00219868	0.0438821	mmu-miR-874-3p	67.1603	160.155	-1.1385	0.0024216	0.042104	NM_011838.4	23936	Lynx1	transcript	25.7672	40.3626	-0.647487	0.000722116	0.0276354
NR_002864.2	353342	Peg13	lncRNA	14.1695	9.88702	0.519179	0.00219868	0.0438821	mmu-miR-874-3p	67.1603	160.155	-1.1385	0.0024216	0.042104	NM_001098225.2	11496	Adam22	transcript	2.58778	0.00525567	8.94362	2.29e-06	0.0151166
NR_002864.2	353342	Peg13	lncRNA	14.1695	9.88702	0.519179	0.00219868	0.0438821	mmu-miR-874-3p	67.1603	160.155	-1.1385	0.0024216	0.042104	XM_030253061.2	100273	Osbpl9	transcript	0.913933	0	Inf	0.000964603	0.0297987
NR_002864.2	353342	Peg13	lncRNA	14.1695	9.88702	0.519179	0.00219868	0.0438821	mmu-miR-874-3p	67.1603	160.155	-1.1385	0.0024216	0.042104	TCONS_00020016	65246	Xpo7	transcript	4.13029	0.00722533	9.15896	0.00116536	0.0326432
NR_002864.2	353342	Peg13	lncRNA	14.1695	9.88702	0.519179	0.00219868	0.0438821	mmu-miR-874-3p	67.1603	160.155	-1.1385	0.0024216	0.042104	TCONS_00023739	76594	Dnajc18	transcript	1.93372	0	Inf	0.000820671	0.0276354
NR_002864.2	353342	Peg13	lncRNA	14.1695	9.88702	0.519179	0.00219868	0.0438821	mmu-miR-874-3p	67.1603	160.155	-1.1385	0.0024216	0.042104	TCONS_00006799	68303	Fam114a1	transcript	0.995193	0	Inf	0.000820671	0.0276354
NR_002864.2	353342	Peg13	lncRNA	14.1695	9.88702	0.519179	0.00219868	0.0438821	mmu-miR-874-3p	67.1603	160.155	-1.1385	0.0024216	0.042104	NM_172925.2	244923	Klhl31	transcript	25.7365	28.473	-0.145783	0.00102428	0.0304533
NR_002864.2	353342	Peg13	lncRNA	14.1695	9.88702	0.519179	0.00219868	0.0438821	mmu-miR-874-3p	67.1603	160.155	-1.1385	0.0024216	0.042104	NM_001347446.1	94089	Trim7	transcript	1.16147	7.15854	-2.62371	0.00045152	0.0276354
NR_002864.2	353342	Peg13	lncRNA	14.1695	9.88702	0.519179	0.00219868	0.0438821	mmu-miR-874-3p	67.1603	160.155	-1.1385	0.0024216	0.042104	NM_009818.1	12385	Ctnna1	transcript	89.2245	90.2244	-0.0160775	0.000857497	0.0281337
NR_002864.2	353342	Peg13	lncRNA	14.1695	9.88702	0.519179	0.00219868	0.0438821	mmu-miR-874-3p	67.1603	160.155	-1.1385	0.0024216	0.042104	NM_001355755.1	17896	Myl4	transcript	9.13829	0.191058	5.57984	0.00178945	0.0391774
NR_002864.2	353342	Peg13	lncRNA	14.1695	9.88702	0.519179	0.00219868	0.0438821	mmu-miR-874-3p	67.1603	160.155	-1.1385	0.0024216	0.042104	XM_036154088.1	319518	Pdpr	transcript	1.61977	3.72043	-1.19968	0.000122455	0.0276354
NR_002864.2	353342	Peg13	lncRNA	14.1695	9.88702	0.519179	0.00219868	0.0438821	mmu-miR-874-3p	67.1603	160.155	-1.1385	0.0024216	0.042104	XM_030246370.1	72729	Cdc42se2	transcript	1.75393	0.133176	3.71919	3e-05	0.0155632
NR_002864.2	353342	Peg13	lncRNA	14.1695	9.88702	0.519179	0.00219868	0.0438821	mmu-miR-874-3p	67.1603	160.155	-1.1385	0.0024216	0.042104	NM_016709.2	11992	Auh	transcript	23.1108	25.9264	-0.165855	0.00124159	0.0335637
NR_002864.2	353342	Peg13	lncRNA	14.1695	9.88702	0.519179	0.00219868	0.0438821	mmu-miR-874-3p	67.1603	160.155	-1.1385	0.0024216	0.042104	TCONS_00022612	225049	Ttc7	transcript	1.28356	2.38495	-0.893809	1.15e-05	0.0155632
NR_002864.2	353342	Peg13	lncRNA	14.1695	9.88702	0.519179	0.00219868	0.0438821	mmu-miR-874-3p	67.1603	160.155	-1.1385	0.0024216	0.042104	XM_006517134.5	18193	Nsd1	transcript	1.9852	0.448937	2.1447	0.00060106	0.0276354
NR_002864.2	353342	Peg13	lncRNA	14.1695	9.88702	0.519179	0.00219868	0.0438821	mmu-miR-874-3p	67.1603	160.155	-1.1385	0.0024216	0.042104	TCONS_00001035	21961	Tns1	transcript	39.6786	2.46049	4.01134	0.00031257	0.0276354
NR_002864.2	353342	Peg13	lncRNA	14.1695	9.88702	0.519179	0.00219868	0.0438821	mmu-miR-874-3p	67.1603	160.155	-1.1385	0.0024216	0.042104	NM_011207.2	545622	Ptpn3	transcript	2.85143	0.047324	5.91297	0.000765875	0.0276354
NR_002864.2	353342	Peg13	lncRNA	14.1695	9.88702	0.519179	0.00219868	0.0438821	mmu-miR-874-3p	67.1603	160.155	-1.1385	0.0024216	0.042104	XM_030255147.2	381290	Atp2b4	transcript	1.79149	0	Inf	0.000233871	0.0276354
NR_002864.2	353342	Peg13	lncRNA	14.1695	9.88702	0.519179	0.00219868	0.0438821	mmu-miR-874-3p	67.1603	160.155	-1.1385	0.0024216	0.042104	TCONS_00017675	68519	Eml1	transcript	11.0496	10.9045	0.0190772	0.00239943	0.0465183
NR_002864.2	353342	Peg13	lncRNA	14.1695	9.88702	0.519179	0.00219868	0.0438821	mmu-miR-874-3p	67.1603	160.155	-1.1385	0.0024216	0.042104	NM_177411.4	19344	Rab5b	transcript	15.3906	17.862	-0.214852	0.000321654	0.0276354
NR_002864.2	353342	Peg13	lncRNA	14.1695	9.88702	0.519179	0.00219868	0.0438821	mmu-miR-874-3p	67.1603	160.155	-1.1385	0.0024216	0.042104	NM_023317.2	67203	Nde1	transcript	1.95862	4.78075	-1.2874	2.29e-05	0.0155632
NR_002864.2	353342	Peg13	lncRNA	14.1695	9.88702	0.519179	0.00219868	0.0438821	mmu-miR-874-3p	67.1603	160.155	-1.1385	0.0024216	0.042104	NM_025829.4	66892	Eif4e3	transcript	8.06038	15.9332	-0.98312	2.78e-05	0.0155632
NR_002864.2	353342	Peg13	lncRNA	14.1695	9.88702	0.519179	0.00219868	0.0438821	mmu-miR-874-3p	67.1603	160.155	-1.1385	0.0024216	0.042104	NM_173866.4	108682	Gpt2	transcript	1.46859	5.47079	-1.89731	0.000818569	0.0276354
NR_002864.2	353342	Peg13	lncRNA	14.1695	9.88702	0.519179	0.00219868	0.0438821	mmu-miR-874-3p	67.1603	160.155	-1.1385	0.0024216	0.042104	XM_006524674.5	56468	Socs5	transcript	2.99592	0.0603897	5.63255	0.000527102	0.0276354
NR_002864.2	353342	Peg13	lncRNA	14.1695	9.88702	0.519179	0.00219868	0.0438821	mmu-miR-874-3p	67.1603	160.155	-1.1385	0.0024216	0.042104	XM_006517452.5	76577	Faf2	transcript	0.845375	0	Inf	0.000820671	0.0276354
NR_002864.2	353342	Peg13	lncRNA	14.1695	9.88702	0.519179	0.00219868	0.0438821	mmu-miR-874-3p	67.1603	160.155	-1.1385	0.0024216	0.042104	NM_145605.2	234825	Klhdc4	transcript	1.15389	3.19303	-1.46842	0.000484263	0.0276354
NR_002864.2	353342	Peg13	lncRNA	14.1695	9.88702	0.519179	0.00219868	0.0438821	mmu-miR-874-3p	67.1603	160.155	-1.1385	0.0024216	0.042104	NM_177322.3	11607	Agtr1a	transcript	16.509	9.02107	0.871884	1.52e-05	0.0155632
NR_002864.2	353342	Peg13	lncRNA	14.1695	9.88702	0.519179	0.00219868	0.0438821	mmu-miR-874-3p	67.1603	160.155	-1.1385	0.0024216	0.042104	NM_007802.4	13038	Ctsk	transcript	3.1683	1.31973	1.26347	0.000832761	0.0278144
NR_002864.2	353342	Peg13	lncRNA	14.1695	9.88702	0.519179	0.00219868	0.0438821	mmu-miR-874-3p	67.1603	160.155	-1.1385	0.0024216	0.042104	TCONS_00002486	68295	Aar2	transcript	1.18122	0	Inf	0.000820671	0.0276354
NR_002864.2	353342	Peg13	lncRNA	14.1695	9.88702	0.519179	0.00219868	0.0438821	mmu-miR-874-3p	67.1603	160.155	-1.1385	0.0024216	0.042104	NM_001024606.2	382051	Pdp2	transcript	3.49019	6.43953	-0.883649	0.00130674	0.0342571
NR_002864.2	353342	Peg13	lncRNA	14.1695	9.88702	0.519179	0.00219868	0.0438821	mmu-miR-874-3p	67.1603	160.155	-1.1385	0.0024216	0.042104	NM_001288613.1	245860	Atg9a	transcript	2.10893	0.14069	3.90593	0.000401703	0.0276354
NR_002864.2	353342	Peg13	lncRNA	14.1695	9.88702	0.519179	0.00219868	0.0438821	mmu-miR-874-3p	67.1603	160.155	-1.1385	0.0024216	0.042104	XM_017317778.3	100502841	Epg5	transcript	0.826306	0.00611767	7.07755	0.000717464	0.0276354
NR_002864.2	353342	Peg13	lncRNA	14.1695	9.88702	0.519179	0.00219868	0.0438821	mmu-miR-874-3p	67.1603	160.155	-1.1385	0.0024216	0.042104	NM_130449.2	140792	Colec12	transcript	3.99678	3.31964	0.26781	0.00250276	0.0477182
NR_002864.2	353342	Peg13	lncRNA	14.1695	9.88702	0.519179	0.00219868	0.0438821	mmu-miR-874-3p	67.1603	160.155	-1.1385	0.0024216	0.042104	NM_001362722.1	74103	Nebl	transcript	26.0163	0	Inf	2.74e-05	0.0155632
NR_002864.2	353342	Peg13	lncRNA	14.1695	9.88702	0.519179	0.00219868	0.0438821	mmu-miR-874-3p	67.1603	160.155	-1.1385	0.0024216	0.042104	NM_008664.2	17930	Myom2	transcript	424.854	190.825	1.15472	0.000145974	0.0276354
NR_002864.2	353342	Peg13	lncRNA	14.1695	9.88702	0.519179	0.00219868	0.0438821	mmu-miR-874-3p	67.1603	160.155	-1.1385	0.0024216	0.042104	NM_146243.2	66713	Actr2	transcript	29.0525	22.8911	0.343875	0.00149481	0.0362404
NR_002864.2	353342	Peg13	lncRNA	14.1695	9.88702	0.519179	0.00219868	0.0438821	mmu-miR-874-3p	67.1603	160.155	-1.1385	0.0024216	0.042104	XM_036157952.1	12908	Crat	transcript	3.05654	0	Inf	5.87e-05	0.0211184
NR_002864.2	353342	Peg13	lncRNA	14.1695	9.88702	0.519179	0.00219868	0.0438821	mmu-miR-874-3p	67.1603	160.155	-1.1385	0.0024216	0.042104	NM_026582.5	68151	Wls	transcript	7.4038	5.38228	0.460048	0.000248241	0.0276354
NR_002864.2	353342	Peg13	lncRNA	14.1695	9.88702	0.519179	0.00219868	0.0438821	mmu-miR-874-3p	67.1603	160.155	-1.1385	0.0024216	0.042104	NM_026524.4	68041	Mid1ip1	transcript	37.9267	30.3802	0.320079	0.000987289	0.0299274
NR_002864.2	353342	Peg13	lncRNA	14.1695	9.88702	0.519179	0.00219868	0.0438821	mmu-miR-874-3p	67.1603	160.155	-1.1385	0.0024216	0.042104	XM_006538665.4	192185	Nadk	transcript	0.972007	0.0104583	6.53824	0.00196035	0.0413468
NR_002864.2	353342	Peg13	lncRNA	14.1695	9.88702	0.519179	0.00219868	0.0438821	mmu-miR-874-3p	67.1603	160.155	-1.1385	0.0024216	0.042104	NM_008706.5	18104	Nqo1	transcript	44.8113	23.425	0.935811	0.000167384	0.0276354
NR_002864.2	353342	Peg13	lncRNA	14.1695	9.88702	0.519179	0.00219868	0.0438821	mmu-miR-874-3p	67.1603	160.155	-1.1385	0.0024216	0.042104	NM_025557.1	66425	Pcp4l1	transcript	16.3196	50.2128	-1.62145	0.000300043	0.0276354
NR_002864.2	353342	Peg13	lncRNA	14.1695	9.88702	0.519179	0.00219868	0.0438821	mmu-miR-874-3p	67.1603	160.155	-1.1385	0.0024216	0.042104	NM_175398.4	109050	Inka2	transcript	2.56575	7.08752	-1.4659	0.00255544	0.0482407
NR_002864.2	353342	Peg13	lncRNA	14.1695	9.88702	0.519179	0.00219868	0.0438821	mmu-miR-874-3p	67.1603	160.155	-1.1385	0.0024216	0.042104	NM_001081242.2	70549	Tln2	transcript	2.63951	0.0295667	6.48015	0.000371777	0.0276354
NR_002864.2	353342	Peg13	lncRNA	14.1695	9.88702	0.519179	0.00219868	0.0438821	mmu-miR-874-3p	67.1603	160.155	-1.1385	0.0024216	0.042104	XM_011239446.4	228026	Pdk1	transcript	3.2763	0	Inf	0.000820671	0.0276354
NR_002864.2	353342	Peg13	lncRNA	14.1695	9.88702	0.519179	0.00219868	0.0438821	mmu-miR-874-3p	67.1603	160.155	-1.1385	0.0024216	0.042104	NM_011293.2	20022	Polr2j	transcript	13.2814	15.4381	-0.217088	0.000690938	0.0276354
NR_002864.2	353342	Peg13	lncRNA	14.1695	9.88702	0.519179	0.00219868	0.0438821	mmu-miR-874-3p	67.1603	160.155	-1.1385	0.0024216	0.042104	TCONS_00021414	56637	Gsk3b	transcript	3.22604	0	Inf	0.000820671	0.0276354
NR_002864.2	353342	Peg13	lncRNA	14.1695	9.88702	0.519179	0.00219868	0.0438821	mmu-miR-874-3p	67.1603	160.155	-1.1385	0.0024216	0.042104	NM_026443.4	67900	Mtfp1	transcript	27.5971	35.7028	-0.37152	0.000338742	0.0276354
NR_002864.2	353342	Peg13	lncRNA	14.1695	9.88702	0.519179	0.00219868	0.0438821	mmu-miR-874-3p	67.1603	160.155	-1.1385	0.0024216	0.042104	NM_022891.3	65019	Rpl23	transcript	63.7671	68.7937	-0.109465	0.00161807	0.037419
NR_002864.2	353342	Peg13	lncRNA	14.1695	9.88702	0.519179	0.00219868	0.0438821	mmu-miR-874-3p	67.1603	160.155	-1.1385	0.0024216	0.042104	NM_026824.4	68730	Dus1l	transcript	0	3.13193	#NAME?	0.000987532	0.0299274
NR_002864.2	353342	Peg13	lncRNA	14.1695	9.88702	0.519179	0.00219868	0.0438821	mmu-miR-874-3p	67.1603	160.155	-1.1385	0.0024216	0.042104	NM_025600.2	66498	Dda1	transcript	5.91252	6.16339	-0.0599504	0.000969153	0.0297987
NR_002864.2	353342	Peg13	lncRNA	14.1695	9.88702	0.519179	0.00219868	0.0438821	mmu-miR-874-3p	67.1603	160.155	-1.1385	0.0024216	0.042104	XM_006503677.4	11518	Add1	transcript	1.28784	0.00563833	7.83547	0.000849239	0.028103
NR_002864.2	353342	Peg13	lncRNA	14.1695	9.88702	0.519179	0.00219868	0.0438821	mmu-miR-874-3p	67.1603	160.155	-1.1385	0.0024216	0.042104	NM_001013390.3	399548	Scn4b	transcript	2.15251	16.2847	-2.91942	0.00111032	0.0316263
NR_002864.2	353342	Peg13	lncRNA	14.1695	9.88702	0.519179	0.00219868	0.0438821	mmu-miR-874-3p	67.1603	160.155	-1.1385	0.0024216	0.042104	TCONS_00022043	20656	Sod2	transcript	6.07359	0.19545	4.95768	0.0002461	0.0276354
NR_002864.2	353342	Peg13	lncRNA	14.1695	9.88702	0.519179	0.00219868	0.0438821	mmu-miR-874-3p	67.1603	160.155	-1.1385	0.0024216	0.042104	XM_006515925.4	26932	Ppp2r5e	transcript	1.17794	0.258766	2.18654	0.000952025	0.0296311
NR_002864.2	353342	Peg13	lncRNA	14.1695	9.88702	0.519179	0.00219868	0.0438821	mmu-miR-874-3p	67.1603	160.155	-1.1385	0.0024216	0.042104	NM_009634.6	11564	Adsl	transcript	8.39214	7.60029	0.142984	0.000689457	0.0276354
NR_002864.2	353342	Peg13	lncRNA	14.1695	9.88702	0.519179	0.00219868	0.0438821	mmu-miR-874-3p	67.1603	160.155	-1.1385	0.0024216	0.042104	NM_177059.3	320027	Fstl4	transcript	2.66003	0	Inf	0.00041668	0.0276354
NR_002864.2	353342	Peg13	lncRNA	14.1695	9.88702	0.519179	0.00219868	0.0438821	mmu-miR-874-3p	67.1603	160.155	-1.1385	0.0024216	0.042104	NM_008681.2	17988	Ndrg1	transcript	13.4879	7.27813	0.890022	0.00249471	0.0476436
NR_002864.2	353342	Peg13	lncRNA	14.1695	9.88702	0.519179	0.00219868	0.0438821	mmu-miR-874-3p	67.1603	160.155	-1.1385	0.0024216	0.042104	NM_018743.4	102247	Gpat4	transcript	7.76624	6.97285	0.155467	0.00132739	0.0345061
NR_002864.2	353342	Peg13	lncRNA	14.1695	9.88702	0.519179	0.00219868	0.0438821	mmu-miR-874-3p	67.1603	160.155	-1.1385	0.0024216	0.042104	NM_133702.3	68979	Nol11	transcript	5.69427	3.78451	0.589407	0.00138039	0.0351828
NR_002864.2	353342	Peg13	lncRNA	14.1695	9.88702	0.519179	0.00219868	0.0438821	mmu-miR-874-3p	67.1603	160.155	-1.1385	0.0024216	0.042104	XM_030244718.2	78267	Klhdc8b	transcript	0.935272	0.0147827	5.98341	0.00120816	0.0332056
NR_002864.2	353342	Peg13	lncRNA	14.1695	9.88702	0.519179	0.00219868	0.0438821	mmu-miR-874-3p	67.1603	160.155	-1.1385	0.0024216	0.042104	NM_001113408.2	16825	Ldb1	transcript	7.39907	6.99442	0.0811388	9.29e-05	0.0264941
NR_002864.2	353342	Peg13	lncRNA	14.1695	9.88702	0.519179	0.00219868	0.0438821	mmu-miR-874-3p	67.1603	160.155	-1.1385	0.0024216	0.042104	NM_027113.2	69544	Wdr5b	transcript	2.3334	0.0822317	4.8266	0.00171747	0.0384046
NR_002864.2	353342	Peg13	lncRNA	14.1695	9.88702	0.519179	0.00219868	0.0438821	mmu-miR-874-3p	67.1603	160.155	-1.1385	0.0024216	0.042104	NM_009647.5	11639	Ak4	transcript	3.29582	0.0275303	6.90347	0.00015385	0.0276354
NR_002864.2	353342	Peg13	lncRNA	14.1695	9.88702	0.519179	0.00219868	0.0438821	mmu-miR-874-3p	67.1603	160.155	-1.1385	0.0024216	0.042104	XM_036165784.1	12321	Calu	transcript	10.5439	16.3948	-0.636826	0.00157708	0.0372453
NR_002864.2	353342	Peg13	lncRNA	14.1695	9.88702	0.519179	0.00219868	0.0438821	mmu-miR-874-3p	67.1603	160.155	-1.1385	0.0024216	0.042104	NM_019694.2	56384	Letm1	transcript	5.73717	11.2145	-0.966953	0.000238425	0.0276354
NR_002864.2	353342	Peg13	lncRNA	14.1695	9.88702	0.519179	0.00219868	0.0438821	mmu-miR-874-3p	67.1603	160.155	-1.1385	0.0024216	0.042104	NM_025828.3	66890	Lman2	transcript	13.183	13.5281	-0.0372866	0.00183952	0.0400109
NR_002864.2	353342	Peg13	lncRNA	14.1695	9.88702	0.519179	0.00219868	0.0438821	mmu-miR-874-3p	67.1603	160.155	-1.1385	0.0024216	0.042104	NM_009710.4	11870	Art1	transcript	35.968	53.38	-0.569584	0.000340564	0.0276354
NR_002864.2	353342	Peg13	lncRNA	14.1695	9.88702	0.519179	0.00219868	0.0438821	mmu-miR-874-3p	67.1603	160.155	-1.1385	0.0024216	0.042104	XM_036161439.1	14773	Grk5	transcript	3.29743	0	Inf	0.000145308	0.0276354
NR_002864.2	353342	Peg13	lncRNA	14.1695	9.88702	0.519179	0.00219868	0.0438821	mmu-miR-874-3p	67.1603	160.155	-1.1385	0.0024216	0.042104	XM_036161998.1	241694	Ralgapa2	transcript	4.94291	0.169671	4.86455	0.000222044	0.0276354
NR_002864.2	353342	Peg13	lncRNA	14.1695	9.88702	0.519179	0.00219868	0.0438821	mmu-miR-874-3p	67.1603	160.155	-1.1385	0.0024216	0.042104	NM_175236.5	76187	Adhfe1	transcript	5.22125	5.88058	-0.171562	0.00131045	0.0342571
NR_002864.2	353342	Peg13	lncRNA	14.1695	9.88702	0.519179	0.00219868	0.0438821	mmu-miR-874-3p	67.1603	160.155	-1.1385	0.0024216	0.042104	TCONS_00022742	30957	Mapk8ip3	transcript	0.033413	2.79614	-6.38688	0.000274522	0.0276354
NR_002864.2	353342	Peg13	lncRNA	14.1695	9.88702	0.519179	0.00219868	0.0438821	mmu-miR-874-3p	67.1603	160.155	-1.1385	0.0024216	0.042104	NM_001012477.2	20315	Cxcl12	transcript	8.72303	23.6765	-1.44055	0.000741939	0.0276354
NR_002864.2	353342	Peg13	lncRNA	14.1695	9.88702	0.519179	0.00219868	0.0438821	mmu-miR-874-3p	67.1603	160.155	-1.1385	0.0024216	0.042104	NM_024214.2	67952	Tomm20	transcript	10.2066	7.84903	0.378922	0.000773909	0.0276354
NR_002864.2	353342	Peg13	lncRNA	14.1695	9.88702	0.519179	0.00219868	0.0438821	mmu-miR-874-3p	67.1603	160.155	-1.1385	0.0024216	0.042104	XM_006518707.3	19056	Ppp3cb	transcript	0.007019	4.54103	-9.33754	0.00110514	0.0316263
NR_002864.2	353342	Peg13	lncRNA	14.1695	9.88702	0.519179	0.00219868	0.0438821	mmu-miR-874-3p	67.1603	160.155	-1.1385	0.0024216	0.042104	NM_025407.2	22273	Uqcrc1	transcript	305.19	377.485	-0.306711	0.000478795	0.0276354
NR_002864.2	353342	Peg13	lncRNA	14.1695	9.88702	0.519179	0.00219868	0.0438821	mmu-miR-874-3p	67.1603	160.155	-1.1385	0.0024216	0.042104	NM_001013024.2	72607	Usp13	transcript	43.9871	44.7173	-0.0237507	0.000631592	0.0276354
NR_002864.2	353342	Peg13	lncRNA	14.1695	9.88702	0.519179	0.00219868	0.0438821	mmu-miR-874-3p	67.1603	160.155	-1.1385	0.0024216	0.042104	TCONS_00014905	216161	Sbno2	transcript	4.64735	3.20414	0.536473	0.00139977	0.0352728
NR_002864.2	353342	Peg13	lncRNA	14.1695	9.88702	0.519179	0.00219868	0.0438821	mmu-miR-874-3p	67.1603	160.155	-1.1385	0.0024216	0.042104	NM_001115132.2	52683	Ncaph2	transcript	3.1926	0.540685	2.56187	0.00108613	0.0314517
NR_002864.2	353342	Peg13	lncRNA	14.1695	9.88702	0.519179	0.00219868	0.0438821	mmu-miR-874-3p	67.1603	160.155	-1.1385	0.0024216	0.042104	NM_008338.4	15980	Ifngr2	transcript	40.1831	60.2437	-0.584221	7.98e-05	0.0253471
NR_002864.2	353342	Peg13	lncRNA	14.1695	9.88702	0.519179	0.00219868	0.0438821	mmu-miR-874-3p	67.1603	160.155	-1.1385	0.0024216	0.042104	XM_036156491.1	20787	Srebf1	transcript	2.73364	0.07479	5.19183	7.86e-05	0.0253471
NR_002864.2	353342	Peg13	lncRNA	14.1695	9.88702	0.519179	0.00219868	0.0438821	mmu-miR-874-3p	67.1603	160.155	-1.1385	0.0024216	0.042104	NM_008688.3	18029	Nfic	transcript	4.59623	14.0914	-1.61629	0.00200236	0.0419257
NR_002864.2	353342	Peg13	lncRNA	14.1695	9.88702	0.519179	0.00219868	0.0438821	mmu-miR-874-3p	67.1603	160.155	-1.1385	0.0024216	0.042104	XM_036165926.1	18575	Pde1c	transcript	2.25441	0.005907	8.57611	0.000698786	0.0276354
NR_002864.2	353342	Peg13	lncRNA	14.1695	9.88702	0.519179	0.00219868	0.0438821	mmu-miR-874-3p	67.1603	160.155	-1.1385	0.0024216	0.042104	XM_006505459.3	12444	Ccnd2	transcript	3.84378	0.0527657	6.18678	0.000467463	0.0276354
NR_002864.2	353342	Peg13	lncRNA	14.1695	9.88702	0.519179	0.00219868	0.0438821	mmu-miR-874-3p	67.1603	160.155	-1.1385	0.0024216	0.042104	XM_036156605.1	217331	Unk	transcript	0.843465	0	Inf	0.000820671	0.0276354
NR_002864.2	353342	Peg13	lncRNA	14.1695	9.88702	0.519179	0.00219868	0.0438821	mmu-miR-874-3p	67.1603	160.155	-1.1385	0.0024216	0.042104	NM_001169577.1	22214	Ube2h	transcript	1.41218	0.0643033	4.45689	0.00189306	0.0407486
NR_002864.2	353342	Peg13	lncRNA	14.1695	9.88702	0.519179	0.00219868	0.0438821	mmu-miR-874-3p	67.1603	160.155	-1.1385	0.0024216	0.042104	NM_027727.3	69190	Dym	transcript	21.0629	19.308	0.125505	0.00123487	0.0335637
XR_004934374.1	102635071	Gm26944	lncRNA	0.987437	0	Inf	0.00261628	0.0488316	mmu-miR-29b-2-5p	32.6134	115.312	-1.5205	0.0011706	0.026507	XM_036162424.1	57438	Marchf7	transcript	2.44408	0	Inf	0.000909325	0.0291578
XR_004934374.1	102635071	Gm26944	lncRNA	0.987437	0	Inf	0.00261628	0.0488316	mmu-miR-29b-2-5p	32.6134	115.312	-1.5205	0.0011706	0.026507	NM_173866.4	108682	Gpt2	transcript	1.46859	5.47079	-1.89731	0.000818569	0.0276354
XR_004934374.1	102635071	Gm26944	lncRNA	0.987437	0	Inf	0.00261628	0.0488316	mmu-miR-29b-2-5p	32.6134	115.312	-1.5205	0.0011706	0.026507	NM_001163379.1	55979	Agpat1	transcript	14.6579	11.2463	0.382229	0.000825619	0.0277196
XR_004934374.1	102635071	Gm26944	lncRNA	0.987437	0	Inf	0.00261628	0.0488316	mmu-miR-29b-2-5p	32.6134	115.312	-1.5205	0.0011706	0.026507	TCONS_00025423	66158	Rtl8a	transcript	1.29636	0	Inf	0.000820671	0.0276354
XR_004934374.1	102635071	Gm26944	lncRNA	0.987437	0	Inf	0.00261628	0.0488316	mmu-miR-29b-2-5p	32.6134	115.312	-1.5205	0.0011706	0.026507	XM_006524674.5	56468	Socs5	transcript	2.99592	0.0603897	5.63255	0.000527102	0.0276354
XR_004934374.1	102635071	Gm26944	lncRNA	0.987437	0	Inf	0.00261628	0.0488316	mmu-miR-29b-2-5p	32.6134	115.312	-1.5205	0.0011706	0.026507	NM_177411.4	19344	Rab5b	transcript	15.3906	17.862	-0.214852	0.000321654	0.0276354
XR_004934374.1	102635071	Gm26944	lncRNA	0.987437	0	Inf	0.00261628	0.0488316	mmu-miR-29b-2-5p	32.6134	115.312	-1.5205	0.0011706	0.026507	TCONS_00017675	68519	Eml1	transcript	11.0496	10.9045	0.0190772	0.00239943	0.0465183
XR_004934374.1	102635071	Gm26944	lncRNA	0.987437	0	Inf	0.00261628	0.0488316	mmu-miR-29b-2-5p	32.6134	115.312	-1.5205	0.0011706	0.026507	NM_027859.3	71673	Rnf215	transcript	2.26533	2.64791	-0.22513	0.00109052	0.0314747
XR_004934374.1	102635071	Gm26944	lncRNA	0.987437	0	Inf	0.00261628	0.0488316	mmu-miR-29b-2-5p	32.6134	115.312	-1.5205	0.0011706	0.026507	NM_016709.2	11992	Auh	transcript	23.1108	25.9264	-0.165855	0.00124159	0.0335637
XR_004934374.1	102635071	Gm26944	lncRNA	0.987437	0	Inf	0.00261628	0.0488316	mmu-miR-29b-2-5p	32.6134	115.312	-1.5205	0.0011706	0.026507	XM_030255147.2	381290	Atp2b4	transcript	1.79149	0	Inf	0.000233871	0.0276354
XR_004934374.1	102635071	Gm26944	lncRNA	0.987437	0	Inf	0.00261628	0.0488316	mmu-miR-29b-2-5p	32.6134	115.312	-1.5205	0.0011706	0.026507	NM_001359505.1	77521	Mtus2	transcript	30.9488	21.1013	0.552555	0.000558842	0.0276354
XR_004934374.1	102635071	Gm26944	lncRNA	0.987437	0	Inf	0.00261628	0.0488316	mmu-miR-29b-2-5p	32.6134	115.312	-1.5205	0.0011706	0.026507	NM_001253814.1	71782	Ankle2	transcript	7.72172	4.99246	0.629172	0.00187625	0.0405382
XR_004934374.1	102635071	Gm26944	lncRNA	0.987437	0	Inf	0.00261628	0.0488316	mmu-miR-29b-2-5p	32.6134	115.312	-1.5205	0.0011706	0.026507	TCONS_00024982	22284	Usp9x	transcript	4.42644	0.000426333	13.3419	0.000818366	0.0276354
XR_004934374.1	102635071	Gm26944	lncRNA	0.987437	0	Inf	0.00261628	0.0488316	mmu-miR-29b-2-5p	32.6134	115.312	-1.5205	0.0011706	0.026507	NM_145562.2	231440	Parm1	transcript	37.5905	24.2018	0.635253	0.00139782	0.0352728
XR_004934374.1	102635071	Gm26944	lncRNA	0.987437	0	Inf	0.00261628	0.0488316	mmu-miR-29b-2-5p	32.6134	115.312	-1.5205	0.0011706	0.026507	NM_009818.1	12385	Ctnna1	transcript	89.2245	90.2244	-0.0160775	0.000857497	0.0281337
XR_004934374.1	102635071	Gm26944	lncRNA	0.987437	0	Inf	0.00261628	0.0488316	mmu-miR-29b-2-5p	32.6134	115.312	-1.5205	0.0011706	0.026507	NM_019774.5	56399	Akap8	transcript	4.41498	4.61893	-0.0651514	0.0020109	0.0420282
XR_004934374.1	102635071	Gm26944	lncRNA	0.987437	0	Inf	0.00261628	0.0488316	mmu-miR-29b-2-5p	32.6134	115.312	-1.5205	0.0011706	0.026507	NM_001017429.2	12856	Cox17	transcript	100.01	129.573	-0.373622	0.00264968	0.0491363
XR_004934374.1	102635071	Gm26944	lncRNA	0.987437	0	Inf	0.00261628	0.0488316	mmu-miR-29b-2-5p	32.6134	115.312	-1.5205	0.0011706	0.026507	NM_025824.4	66882	Bzw1	transcript	17.9692	13.9017	0.370267	0.00246002	0.0472596
XR_004934374.1	102635071	Gm26944	lncRNA	0.987437	0	Inf	0.00261628	0.0488316	mmu-miR-29b-2-5p	32.6134	115.312	-1.5205	0.0011706	0.026507	TCONS_00018780	56705	Ranbp9	transcript	4.50464	0	Inf	0.000820671	0.0276354
XR_004934374.1	102635071	Gm26944	lncRNA	0.987437	0	Inf	0.00261628	0.0488316	mmu-miR-29b-2-5p	32.6134	115.312	-1.5205	0.0011706	0.026507	TCONS_00020016	65246	Xpo7	transcript	4.13029	0.00722533	9.15896	0.00116536	0.0326432
XR_004934374.1	102635071	Gm26944	lncRNA	0.987437	0	Inf	0.00261628	0.0488316	mmu-miR-29b-2-5p	32.6134	115.312	-1.5205	0.0011706	0.026507	NM_001083919.1	241431	Xirp2	transcript	71.3789	94.7049	-0.407941	0.000357728	0.0276354
XR_004934374.1	102635071	Gm26944	lncRNA	0.987437	0	Inf	0.00261628	0.0488316	mmu-miR-29b-2-5p	32.6134	115.312	-1.5205	0.0011706	0.026507	NM_001098225.2	11496	Adam22	transcript	2.58778	0.00525567	8.94362	2.29e-06	0.0151166
XR_004934374.1	102635071	Gm26944	lncRNA	0.987437	0	Inf	0.00261628	0.0488316	mmu-miR-29b-2-5p	32.6134	115.312	-1.5205	0.0011706	0.026507	XM_006518778.1	211922	Dennd6a	transcript	0.97065	0.0248183	5.28947	0.00216379	0.0438208
XR_004934374.1	102635071	Gm26944	lncRNA	0.987437	0	Inf	0.00261628	0.0488316	mmu-miR-29b-2-5p	32.6134	115.312	-1.5205	0.0011706	0.026507	NM_133831.3	68077	Nop53	transcript	25.343	23.991	0.0790944	0.000321251	0.0276354
XR_004934374.1	102635071	Gm26944	lncRNA	0.987437	0	Inf	0.00261628	0.0488316	mmu-miR-29b-2-5p	32.6134	115.312	-1.5205	0.0011706	0.026507	TCONS_00022043	20656	Sod2	transcript	6.07359	0.19545	4.95768	0.0002461	0.0276354
XR_004934374.1	102635071	Gm26944	lncRNA	0.987437	0	Inf	0.00261628	0.0488316	mmu-miR-29b-2-5p	32.6134	115.312	-1.5205	0.0011706	0.026507	TCONS_00004132	229663	Csde1	transcript	48.2189	63.0905	-0.387826	0.0012973	0.0342571
XR_004934374.1	102635071	Gm26944	lncRNA	0.987437	0	Inf	0.00261628	0.0488316	mmu-miR-29b-2-5p	32.6134	115.312	-1.5205	0.0011706	0.026507	TCONS_00021414	56637	Gsk3b	transcript	3.22604	0	Inf	0.000820671	0.0276354
XR_004934374.1	102635071	Gm26944	lncRNA	0.987437	0	Inf	0.00261628	0.0488316	mmu-miR-29b-2-5p	32.6134	115.312	-1.5205	0.0011706	0.026507	XM_017316846.2	106393	Srl	transcript	1.95815	3.58796	-0.873667	3.65e-05	0.0155632
XR_004934374.1	102635071	Gm26944	lncRNA	0.987437	0	Inf	0.00261628	0.0488316	mmu-miR-29b-2-5p	32.6134	115.312	-1.5205	0.0011706	0.026507	XM_030249575.2	18607	Pdpk1	transcript	3.59523	0	Inf	2.05e-05	0.0155632
XR_004934374.1	102635071	Gm26944	lncRNA	0.987437	0	Inf	0.00261628	0.0488316	mmu-miR-29b-2-5p	32.6134	115.312	-1.5205	0.0011706	0.026507	TCONS_00002822	67512	Agpat2	transcript	1.95082	0	Inf	0.000820671	0.0276354
XR_004934374.1	102635071	Gm26944	lncRNA	0.987437	0	Inf	0.00261628	0.0488316	mmu-miR-29b-2-5p	32.6134	115.312	-1.5205	0.0011706	0.026507	NM_001081242.2	70549	Tln2	transcript	2.63951	0.0295667	6.48015	0.000371777	0.0276354
XR_004934374.1	102635071	Gm26944	lncRNA	0.987437	0	Inf	0.00261628	0.0488316	mmu-miR-29b-2-5p	32.6134	115.312	-1.5205	0.0011706	0.026507	TCONS_00012867	214897	Csnk1g1	transcript	0.820922	0.006047	7.08488	0.000423387	0.0276354
XR_004934374.1	102635071	Gm26944	lncRNA	0.987437	0	Inf	0.00261628	0.0488316	mmu-miR-29b-2-5p	32.6134	115.312	-1.5205	0.0011706	0.026507	NM_001362722.1	74103	Nebl	transcript	26.0163	0	Inf	2.74e-05	0.0155632
XR_004934374.1	102635071	Gm26944	lncRNA	0.987437	0	Inf	0.00261628	0.0488316	mmu-miR-29b-2-5p	32.6134	115.312	-1.5205	0.0011706	0.026507	NM_199468.2	213436	Rtl3	transcript	2.36875	0.177523	3.73804	0.000371092	0.0276354
XR_004934374.1	102635071	Gm26944	lncRNA	0.987437	0	Inf	0.00261628	0.0488316	mmu-miR-29b-2-5p	32.6134	115.312	-1.5205	0.0011706	0.026507	NM_001362456.1	16509	Kcne1	transcript	4.13095	0.493128	3.06644	0.000339807	0.0276354
XR_004934374.1	102635071	Gm26944	lncRNA	0.987437	0	Inf	0.00261628	0.0488316	mmu-miR-29b-2-5p	32.6134	115.312	-1.5205	0.0011706	0.026507	XM_017321605.3	27418	Mkln1	transcript	1.57045	0.0165473	6.56843	0.00103662	0.0304533
XR_004934374.1	102635071	Gm26944	lncRNA	0.987437	0	Inf	0.00261628	0.0488316	mmu-miR-29b-2-5p	32.6134	115.312	-1.5205	0.0011706	0.026507	NM_130449.2	140792	Colec12	transcript	3.99678	3.31964	0.26781	0.00250276	0.0477182
XR_004934374.1	102635071	Gm26944	lncRNA	0.987437	0	Inf	0.00261628	0.0488316	mmu-miR-29b-2-5p	32.6134	115.312	-1.5205	0.0011706	0.026507	TCONS_00015789	107476	Acaca	transcript	0.855672	0.031853	4.74756	0.0012857	0.0341943
XR_004934374.1	102635071	Gm26944	lncRNA	0.987437	0	Inf	0.00261628	0.0488316	mmu-miR-29b-2-5p	32.6134	115.312	-1.5205	0.0011706	0.026507	TCONS_00002486	68295	Aar2	transcript	1.18122	0	Inf	0.000820671	0.0276354
XR_004934374.1	102635071	Gm26944	lncRNA	0.987437	0	Inf	0.00261628	0.0488316	mmu-miR-29b-2-5p	32.6134	115.312	-1.5205	0.0011706	0.026507	XM_006517452.5	76577	Faf2	transcript	0.845375	0	Inf	0.000820671	0.0276354
XR_004934374.1	102635071	Gm26944	lncRNA	0.987437	0	Inf	0.00261628	0.0488316	mmu-miR-29b-2-5p	32.6134	115.312	-1.5205	0.0011706	0.026507	NM_177322.3	11607	Agtr1a	transcript	16.509	9.02107	0.871884	1.52e-05	0.0155632
XR_004934374.1	102635071	Gm26944	lncRNA	0.987437	0	Inf	0.00261628	0.0488316	mmu-miR-29b-2-5p	32.6134	115.312	-1.5205	0.0011706	0.026507	NM_001355651.1	74182	Gpcpd1	transcript	1.98661	0.186929	3.40975	0.00197354	0.041549
XR_004934374.1	102635071	Gm26944	lncRNA	0.987437	0	Inf	0.00261628	0.0488316	mmu-miR-29b-2-5p	32.6134	115.312	-1.5205	0.0011706	0.026507	TCONS_00022742	30957	Mapk8ip3	transcript	0.033413	2.79614	-6.38688	0.000274522	0.0276354
XR_004934374.1	102635071	Gm26944	lncRNA	0.987437	0	Inf	0.00261628	0.0488316	mmu-miR-29b-2-5p	32.6134	115.312	-1.5205	0.0011706	0.026507	NM_001110844.1	12293	Cacna2d1	transcript	0.631283	4.45131	-2.81787	0.000493731	0.0276354
XR_004934374.1	102635071	Gm26944	lncRNA	0.987437	0	Inf	0.00261628	0.0488316	mmu-miR-29b-2-5p	32.6134	115.312	-1.5205	0.0011706	0.026507	NM_053159.4	94062	Mrpl3	transcript	20.8991	24.078	-0.204272	1.09e-05	0.0155632
XR_004934374.1	102635071	Gm26944	lncRNA	0.987437	0	Inf	0.00261628	0.0488316	mmu-miR-29b-2-5p	32.6134	115.312	-1.5205	0.0011706	0.026507	NM_197990.3	69399	1700025G04Rik	transcript	6.52172	2.62541	1.31271	0.000479421	0.0276354
XR_004934374.1	102635071	Gm26944	lncRNA	0.987437	0	Inf	0.00261628	0.0488316	mmu-miR-29b-2-5p	32.6134	115.312	-1.5205	0.0011706	0.026507	TCONS_00000054	13518	Dst	transcript	5.41743	0.414156	3.70936	0.00225289	0.0446545
XR_004934374.1	102635071	Gm26944	lncRNA	0.987437	0	Inf	0.00261628	0.0488316	mmu-miR-29b-2-5p	32.6134	115.312	-1.5205	0.0011706	0.026507	NM_009195.3	20498	Slc12a4	transcript	6.17795	9.86484	-0.675168	0.00251823	0.0478546
XR_004934374.1	102635071	Gm26944	lncRNA	0.987437	0	Inf	0.00261628	0.0488316	mmu-miR-29b-2-5p	32.6134	115.312	-1.5205	0.0011706	0.026507	NM_001289702.1	83679	Pde4dip	transcript	26.0448	32.6548	-0.326299	0.00157065	0.0372453
XR_004934374.1	102635071	Gm26944	lncRNA	0.987437	0	Inf	0.00261628	0.0488316	mmu-miR-29b-2-5p	32.6134	115.312	-1.5205	0.0011706	0.026507	NM_013651.4	20222	Sf3a2	transcript	0.17961	7.15197	-5.3154	0.00174107	0.0385677
XR_004934374.1	102635071	Gm26944	lncRNA	0.987437	0	Inf	0.00261628	0.0488316	mmu-miR-29b-2-5p	32.6134	115.312	-1.5205	0.0011706	0.026507	TCONS_00020910	223697	Sun2	transcript	2.54478	0	Inf	0.000820671	0.0276354
XR_004934374.1	102635071	Gm26944	lncRNA	0.987437	0	Inf	0.00261628	0.0488316	mmu-miR-29b-2-5p	32.6134	115.312	-1.5205	0.0011706	0.026507	XM_036165784.1	12321	Calu	transcript	10.5439	16.3948	-0.636826	0.00157708	0.0372453
XR_004934374.1	102635071	Gm26944	lncRNA	0.987437	0	Inf	0.00261628	0.0488316	mmu-miR-29b-2-5p	32.6134	115.312	-1.5205	0.0011706	0.026507	NM_019694.2	56384	Letm1	transcript	5.73717	11.2145	-0.966953	0.000238425	0.0276354
XR_004934374.1	102635071	Gm26944	lncRNA	0.987437	0	Inf	0.00261628	0.0488316	mmu-miR-29b-2-5p	32.6134	115.312	-1.5205	0.0011706	0.026507	TCONS_00023547	72124	Seh1l	transcript	2.33466	0.0211037	6.78958	0.000969142	0.0297987
XR_004934374.1	102635071	Gm26944	lncRNA	0.987437	0	Inf	0.00261628	0.0488316	mmu-miR-29b-2-5p	32.6134	115.312	-1.5205	0.0011706	0.026507	NM_009647.5	11639	Ak4	transcript	3.29582	0.0275303	6.90347	0.00015385	0.0276354
XR_004934374.1	102635071	Gm26944	lncRNA	0.987437	0	Inf	0.00261628	0.0488316	mmu-miR-29b-2-5p	32.6134	115.312	-1.5205	0.0011706	0.026507	NM_010516.2	16007	Ccn1	transcript	11.8013	25.7037	-1.12303	0.00153723	0.0369578
XR_004934374.1	102635071	Gm26944	lncRNA	0.987437	0	Inf	0.00261628	0.0488316	mmu-miR-29b-2-5p	32.6134	115.312	-1.5205	0.0011706	0.026507	NM_027558.1	70804	Pgrmc2	transcript	13.5548	8.47909	0.676825	0.000359363	0.0276354
XR_004934374.1	102635071	Gm26944	lncRNA	0.987437	0	Inf	0.00261628	0.0488316	mmu-miR-29b-2-5p	32.6134	115.312	-1.5205	0.0011706	0.026507	NM_008681.2	17988	Ndrg1	transcript	13.4879	7.27813	0.890022	0.00249471	0.0476436
XR_004934374.1	102635071	Gm26944	lncRNA	0.987437	0	Inf	0.00261628	0.0488316	mmu-miR-29b-2-5p	32.6134	115.312	-1.5205	0.0011706	0.026507	NM_008608.4	17387	Mmp14	transcript	4.99864	1.90388	1.39259	0.00209356	0.0430152
XR_004934374.1	102635071	Gm26944	lncRNA	0.987437	0	Inf	0.00261628	0.0488316	mmu-miR-29b-2-5p	32.6134	115.312	-1.5205	0.0011706	0.026507	NM_026275.4	67615	Ube2r2	transcript	5.99431	0.341337	4.13433	0.000853945	0.0281337
XR_004934374.1	102635071	Gm26944	lncRNA	0.987437	0	Inf	0.00261628	0.0488316	mmu-miR-29b-2-5p	32.6134	115.312	-1.5205	0.0011706	0.026507	NM_025987.3	67130	Ndufa6	transcript	145.358	177.624	-0.28922	0.000487275	0.0276354
XR_004934374.1	102635071	Gm26944	lncRNA	0.987437	0	Inf	0.00261628	0.0488316	mmu-miR-29b-2-5p	32.6134	115.312	-1.5205	0.0011706	0.026507	NM_175523.5	243382	Ppm1k	transcript	41.3824	25.3879	0.704875	0.000348613	0.0276354
XR_004934374.1	102635071	Gm26944	lncRNA	0.987437	0	Inf	0.00261628	0.0488316	mmu-miR-29b-2-5p	32.6134	115.312	-1.5205	0.0011706	0.026507	XM_006534523.2	79566	Sh3bp5l	transcript	1.99289	0.00804	7.95345	0.000614637	0.0276354
XR_004934374.1	102635071	Gm26944	lncRNA	0.987437	0	Inf	0.00261628	0.0488316	mmu-miR-29b-2-5p	32.6134	115.312	-1.5205	0.0011706	0.026507	TCONS_00023376	19290	Pura	transcript	2.15409	0.008678	7.9555	0.00096005	0.0297987
XR_004934374.1	102635071	Gm26944	lncRNA	0.987437	0	Inf	0.00261628	0.0488316	mmu-miR-29b-2-5p	32.6134	115.312	-1.5205	0.0011706	0.026507	NM_033322.3	93730	Lztfl1	transcript	1.35882	2.78852	-1.03715	0.00093363	0.0292165
XR_004934374.1	102635071	Gm26944	lncRNA	0.987437	0	Inf	0.00261628	0.0488316	mmu-miR-29b-2-5p	32.6134	115.312	-1.5205	0.0011706	0.026507	NM_029182.1	75141	Rasd2	transcript	5.28095	1.10421	2.25778	0.00103307	0.0304533
XR_004934374.1	102635071	Gm26944	lncRNA	0.987437	0	Inf	0.00261628	0.0488316	mmu-miR-29b-2-5p	32.6134	115.312	-1.5205	0.0011706	0.026507	NM_001169577.1	22214	Ube2h	transcript	1.41218	0.0643033	4.45689	0.00189306	0.0407486
XR_004934374.1	102635071	Gm26944	lncRNA	0.987437	0	Inf	0.00261628	0.0488316	mmu-miR-29b-2-5p	32.6134	115.312	-1.5205	0.0011706	0.026507	NM_011785.4	23797	Akt3	transcript	1.5986	0.0690953	4.53208	0.0015947	0.037419
XR_004934374.1	102635071	Gm26944	lncRNA	0.987437	0	Inf	0.00261628	0.0488316	mmu-miR-29b-2-5p	32.6134	115.312	-1.5205	0.0011706	0.026507	NM_016686.4	22344	Vezf1	transcript	10.1809	9.06881	0.166877	0.0015653	0.0372453
XR_004934374.1	102635071	Gm26944	lncRNA	0.987437	0	Inf	0.00261628	0.0488316	mmu-miR-29b-2-5p	32.6134	115.312	-1.5205	0.0011706	0.026507	XM_036165926.1	18575	Pde1c	transcript	2.25441	0.005907	8.57611	0.000698786	0.0276354
XR_004934374.1	102635071	Gm26944	lncRNA	0.987437	0	Inf	0.00261628	0.0488316	mmu-miR-29b-2-5p	32.6134	115.312	-1.5205	0.0011706	0.026507	XM_011246321.3	19043	Ppm1b	transcript	0.886711	0	Inf	0.000820671	0.0276354
XR_004934374.1	102635071	Gm26944	lncRNA	0.987437	0	Inf	0.00261628	0.0488316	mmu-miR-29b-2-5p	32.6134	115.312	-1.5205	0.0011706	0.026507	NM_008773.4	18442	P2ry2	transcript	5.26081	6.19008	-0.234674	0.00171046	0.0383222
XR_004934374.1	102635071	Gm26944	lncRNA	0.987437	0	Inf	0.00261628	0.0488316	mmu-miR-29b-2-5p	32.6134	115.312	-1.5205	0.0011706	0.026507	XM_006521705.3	107589	Mylk	transcript	3.13462	3.83408	-0.290594	0.00265995	0.0492416
XR_004934374.1	102635071	Gm26944	lncRNA	0.987437	0	Inf	0.00261628	0.0488316	mmu-miR-29b-2-5p	32.6134	115.312	-1.5205	0.0011706	0.026507	TCONS_00008259	243764	Chrm2	transcript	7.92449	7.05464	0.167746	0.000185113	0.0276354
XR_004934374.1	102635071	Gm26944	lncRNA	0.987437	0	Inf	0.00261628	0.0488316	mmu-miR-29b-2-5p	32.6134	115.312	-1.5205	0.0011706	0.026507	NM_001313983.1	21833	Thra	transcript	5.65207	2.85442	0.98558	0.00134355	0.0347693
XR_004934374.1	102635071	Gm26944	lncRNA	0.987437	0	Inf	0.00261628	0.0488316	mmu-miR-29b-2-5p	32.6134	115.312	-1.5205	0.0011706	0.026507	NM_007624.4	12417	Cbx3	transcript	11.8227	12.4877	-0.0789428	0.000712892	0.0276354
XR_004934374.1	102635071	Gm26944	lncRNA	0.987437	0	Inf	0.00261628	0.0488316	mmu-miR-29b-2-5p	32.6134	115.312	-1.5205	0.0011706	0.026507	NM_172635.3	225929	Patl1	transcript	2.3584	0.30042	2.97276	0.00236898	0.0462393
XR_004934374.1	102635071	Gm26944	lncRNA	0.987437	0	Inf	0.00261628	0.0488316	mmu-miR-29b-2-5p	32.6134	115.312	-1.5205	0.0011706	0.026507	NM_144807.3	212862	Chpt1	transcript	60.0128	62.0084	-0.0471931	0.00168964	0.0382088
XR_004934374.1	102635071	Gm26944	lncRNA	0.987437	0	Inf	0.00261628	0.0488316	mmu-miR-29b-2-5p	32.6134	115.312	-1.5205	0.0011706	0.026507	NM_010865.3	17926	Myoc	transcript	4.62467	1.26554	1.8696	0.000550435	0.0276354
XR_004934374.1	102635071	Gm26944	lncRNA	0.987437	0	Inf	0.00261628	0.0488316	mmu-miR-29b-2-5p	32.6134	115.312	-1.5205	0.0011706	0.026507	NM_001081979.2	17257	Mecp2	transcript	3.25013	3.79955	-0.22533	0.000372863	0.0276354
XR_004934374.1	102635071	Gm26944	lncRNA	0.987437	0	Inf	0.00261628	0.0488316	mmu-miR-29b-2-5p	32.6134	115.312	-1.5205	0.0011706	0.026507	NM_001039512.1	117198	Ivns1abp	transcript	5.9554	0	Inf	0.000820671	0.0276354
XR_004934374.1	102635071	Gm26944	lncRNA	0.987437	0	Inf	0.00261628	0.0488316	mmu-miR-29b-2-5p	32.6134	115.312	-1.5205	0.0011706	0.026507	TCONS_00014905	216161	Sbno2	transcript	4.64735	3.20414	0.536473	0.00139977	0.0352728
XR_004934374.1	102635071	Gm26944	lncRNA	0.987437	0	Inf	0.00261628	0.0488316	mmu-miR-29b-2-5p	32.6134	115.312	-1.5205	0.0011706	0.026507	NM_001012477.2	20315	Cxcl12	transcript	8.72303	23.6765	-1.44055	0.000741939	0.0276354
XR_004934374.1	102635071	Gm26944	lncRNA	0.987437	0	Inf	0.00261628	0.0488316	mmu-miR-29b-2-5p	32.6134	115.312	-1.5205	0.0011706	0.026507	XM_006518707.3	19056	Ppp3cb	transcript	0.007019	4.54103	-9.33754	0.00110514	0.0316263
XR_004934374.1	102635071	Gm26944	lncRNA	0.987437	0	Inf	0.00261628	0.0488316	mmu-miR-29b-2-5p	32.6134	115.312	-1.5205	0.0011706	0.026507	XM_030245515.2	12808	Cobl	transcript	1.22489	0.014136	6.43713	0.000731975	0.0276354
TCONS_00022951	118568312	LOC118568312	lncRNA	20.3941	0	Inf	0.000820671	0.0276354	mmu-miR-29b-2-5p	32.6134	115.312	-1.5205	0.0011706	0.026507	XM_036162424.1	57438	Marchf7	transcript	2.44408	0	Inf	0.000909325	0.0291578
TCONS_00022951	118568312	LOC118568312	lncRNA	20.3941	0	Inf	0.000820671	0.0276354	mmu-miR-29b-2-5p	32.6134	115.312	-1.5205	0.0011706	0.026507	NM_173866.4	108682	Gpt2	transcript	1.46859	5.47079	-1.89731	0.000818569	0.0276354
TCONS_00022951	118568312	LOC118568312	lncRNA	20.3941	0	Inf	0.000820671	0.0276354	mmu-miR-29b-2-5p	32.6134	115.312	-1.5205	0.0011706	0.026507	NM_001163379.1	55979	Agpat1	transcript	14.6579	11.2463	0.382229	0.000825619	0.0277196
TCONS_00022951	118568312	LOC118568312	lncRNA	20.3941	0	Inf	0.000820671	0.0276354	mmu-miR-29b-2-5p	32.6134	115.312	-1.5205	0.0011706	0.026507	TCONS_00025423	66158	Rtl8a	transcript	1.29636	0	Inf	0.000820671	0.0276354
TCONS_00022951	118568312	LOC118568312	lncRNA	20.3941	0	Inf	0.000820671	0.0276354	mmu-miR-29b-2-5p	32.6134	115.312	-1.5205	0.0011706	0.026507	XM_006524674.5	56468	Socs5	transcript	2.99592	0.0603897	5.63255	0.000527102	0.0276354
TCONS_00022951	118568312	LOC118568312	lncRNA	20.3941	0	Inf	0.000820671	0.0276354	mmu-miR-29b-2-5p	32.6134	115.312	-1.5205	0.0011706	0.026507	NM_177411.4	19344	Rab5b	transcript	15.3906	17.862	-0.214852	0.000321654	0.0276354
TCONS_00022951	118568312	LOC118568312	lncRNA	20.3941	0	Inf	0.000820671	0.0276354	mmu-miR-29b-2-5p	32.6134	115.312	-1.5205	0.0011706	0.026507	TCONS_00017675	68519	Eml1	transcript	11.0496	10.9045	0.0190772	0.00239943	0.0465183
TCONS_00022951	118568312	LOC118568312	lncRNA	20.3941	0	Inf	0.000820671	0.0276354	mmu-miR-29b-2-5p	32.6134	115.312	-1.5205	0.0011706	0.026507	NM_027859.3	71673	Rnf215	transcript	2.26533	2.64791	-0.22513	0.00109052	0.0314747
TCONS_00022951	118568312	LOC118568312	lncRNA	20.3941	0	Inf	0.000820671	0.0276354	mmu-miR-29b-2-5p	32.6134	115.312	-1.5205	0.0011706	0.026507	NM_016709.2	11992	Auh	transcript	23.1108	25.9264	-0.165855	0.00124159	0.0335637
TCONS_00022951	118568312	LOC118568312	lncRNA	20.3941	0	Inf	0.000820671	0.0276354	mmu-miR-29b-2-5p	32.6134	115.312	-1.5205	0.0011706	0.026507	XM_030255147.2	381290	Atp2b4	transcript	1.79149	0	Inf	0.000233871	0.0276354
TCONS_00022951	118568312	LOC118568312	lncRNA	20.3941	0	Inf	0.000820671	0.0276354	mmu-miR-29b-2-5p	32.6134	115.312	-1.5205	0.0011706	0.026507	NM_001359505.1	77521	Mtus2	transcript	30.9488	21.1013	0.552555	0.000558842	0.0276354
TCONS_00022951	118568312	LOC118568312	lncRNA	20.3941	0	Inf	0.000820671	0.0276354	mmu-miR-29b-2-5p	32.6134	115.312	-1.5205	0.0011706	0.026507	NM_001253814.1	71782	Ankle2	transcript	7.72172	4.99246	0.629172	0.00187625	0.0405382
TCONS_00022951	118568312	LOC118568312	lncRNA	20.3941	0	Inf	0.000820671	0.0276354	mmu-miR-29b-2-5p	32.6134	115.312	-1.5205	0.0011706	0.026507	TCONS_00024982	22284	Usp9x	transcript	4.42644	0.000426333	13.3419	0.000818366	0.0276354
TCONS_00022951	118568312	LOC118568312	lncRNA	20.3941	0	Inf	0.000820671	0.0276354	mmu-miR-29b-2-5p	32.6134	115.312	-1.5205	0.0011706	0.026507	NM_145562.2	231440	Parm1	transcript	37.5905	24.2018	0.635253	0.00139782	0.0352728
TCONS_00022951	118568312	LOC118568312	lncRNA	20.3941	0	Inf	0.000820671	0.0276354	mmu-miR-29b-2-5p	32.6134	115.312	-1.5205	0.0011706	0.026507	NM_009818.1	12385	Ctnna1	transcript	89.2245	90.2244	-0.0160775	0.000857497	0.0281337
TCONS_00022951	118568312	LOC118568312	lncRNA	20.3941	0	Inf	0.000820671	0.0276354	mmu-miR-29b-2-5p	32.6134	115.312	-1.5205	0.0011706	0.026507	NM_019774.5	56399	Akap8	transcript	4.41498	4.61893	-0.0651514	0.0020109	0.0420282
TCONS_00022951	118568312	LOC118568312	lncRNA	20.3941	0	Inf	0.000820671	0.0276354	mmu-miR-29b-2-5p	32.6134	115.312	-1.5205	0.0011706	0.026507	NM_001017429.2	12856	Cox17	transcript	100.01	129.573	-0.373622	0.00264968	0.0491363
TCONS_00022951	118568312	LOC118568312	lncRNA	20.3941	0	Inf	0.000820671	0.0276354	mmu-miR-29b-2-5p	32.6134	115.312	-1.5205	0.0011706	0.026507	NM_025824.4	66882	Bzw1	transcript	17.9692	13.9017	0.370267	0.00246002	0.0472596
TCONS_00022951	118568312	LOC118568312	lncRNA	20.3941	0	Inf	0.000820671	0.0276354	mmu-miR-29b-2-5p	32.6134	115.312	-1.5205	0.0011706	0.026507	TCONS_00018780	56705	Ranbp9	transcript	4.50464	0	Inf	0.000820671	0.0276354
TCONS_00022951	118568312	LOC118568312	lncRNA	20.3941	0	Inf	0.000820671	0.0276354	mmu-miR-29b-2-5p	32.6134	115.312	-1.5205	0.0011706	0.026507	TCONS_00020016	65246	Xpo7	transcript	4.13029	0.00722533	9.15896	0.00116536	0.0326432
TCONS_00022951	118568312	LOC118568312	lncRNA	20.3941	0	Inf	0.000820671	0.0276354	mmu-miR-29b-2-5p	32.6134	115.312	-1.5205	0.0011706	0.026507	NM_001083919.1	241431	Xirp2	transcript	71.3789	94.7049	-0.407941	0.000357728	0.0276354
TCONS_00022951	118568312	LOC118568312	lncRNA	20.3941	0	Inf	0.000820671	0.0276354	mmu-miR-29b-2-5p	32.6134	115.312	-1.5205	0.0011706	0.026507	NM_001098225.2	11496	Adam22	transcript	2.58778	0.00525567	8.94362	2.29e-06	0.0151166
TCONS_00022951	118568312	LOC118568312	lncRNA	20.3941	0	Inf	0.000820671	0.0276354	mmu-miR-29b-2-5p	32.6134	115.312	-1.5205	0.0011706	0.026507	XM_006518778.1	211922	Dennd6a	transcript	0.97065	0.0248183	5.28947	0.00216379	0.0438208
TCONS_00022951	118568312	LOC118568312	lncRNA	20.3941	0	Inf	0.000820671	0.0276354	mmu-miR-29b-2-5p	32.6134	115.312	-1.5205	0.0011706	0.026507	NM_133831.3	68077	Nop53	transcript	25.343	23.991	0.0790944	0.000321251	0.0276354
TCONS_00022951	118568312	LOC118568312	lncRNA	20.3941	0	Inf	0.000820671	0.0276354	mmu-miR-29b-2-5p	32.6134	115.312	-1.5205	0.0011706	0.026507	TCONS_00022043	20656	Sod2	transcript	6.07359	0.19545	4.95768	0.0002461	0.0276354
TCONS_00022951	118568312	LOC118568312	lncRNA	20.3941	0	Inf	0.000820671	0.0276354	mmu-miR-29b-2-5p	32.6134	115.312	-1.5205	0.0011706	0.026507	TCONS_00004132	229663	Csde1	transcript	48.2189	63.0905	-0.387826	0.0012973	0.0342571
TCONS_00022951	118568312	LOC118568312	lncRNA	20.3941	0	Inf	0.000820671	0.0276354	mmu-miR-29b-2-5p	32.6134	115.312	-1.5205	0.0011706	0.026507	TCONS_00021414	56637	Gsk3b	transcript	3.22604	0	Inf	0.000820671	0.0276354
TCONS_00022951	118568312	LOC118568312	lncRNA	20.3941	0	Inf	0.000820671	0.0276354	mmu-miR-29b-2-5p	32.6134	115.312	-1.5205	0.0011706	0.026507	XM_017316846.2	106393	Srl	transcript	1.95815	3.58796	-0.873667	3.65e-05	0.0155632
TCONS_00022951	118568312	LOC118568312	lncRNA	20.3941	0	Inf	0.000820671	0.0276354	mmu-miR-29b-2-5p	32.6134	115.312	-1.5205	0.0011706	0.026507	XM_030249575.2	18607	Pdpk1	transcript	3.59523	0	Inf	2.05e-05	0.0155632
TCONS_00022951	118568312	LOC118568312	lncRNA	20.3941	0	Inf	0.000820671	0.0276354	mmu-miR-29b-2-5p	32.6134	115.312	-1.5205	0.0011706	0.026507	TCONS_00002822	67512	Agpat2	transcript	1.95082	0	Inf	0.000820671	0.0276354
TCONS_00022951	118568312	LOC118568312	lncRNA	20.3941	0	Inf	0.000820671	0.0276354	mmu-miR-29b-2-5p	32.6134	115.312	-1.5205	0.0011706	0.026507	NM_001081242.2	70549	Tln2	transcript	2.63951	0.0295667	6.48015	0.000371777	0.0276354
TCONS_00022951	118568312	LOC118568312	lncRNA	20.3941	0	Inf	0.000820671	0.0276354	mmu-miR-29b-2-5p	32.6134	115.312	-1.5205	0.0011706	0.026507	TCONS_00012867	214897	Csnk1g1	transcript	0.820922	0.006047	7.08488	0.000423387	0.0276354
TCONS_00022951	118568312	LOC118568312	lncRNA	20.3941	0	Inf	0.000820671	0.0276354	mmu-miR-29b-2-5p	32.6134	115.312	-1.5205	0.0011706	0.026507	NM_001362722.1	74103	Nebl	transcript	26.0163	0	Inf	2.74e-05	0.0155632
TCONS_00022951	118568312	LOC118568312	lncRNA	20.3941	0	Inf	0.000820671	0.0276354	mmu-miR-29b-2-5p	32.6134	115.312	-1.5205	0.0011706	0.026507	NM_199468.2	213436	Rtl3	transcript	2.36875	0.177523	3.73804	0.000371092	0.0276354
TCONS_00022951	118568312	LOC118568312	lncRNA	20.3941	0	Inf	0.000820671	0.0276354	mmu-miR-29b-2-5p	32.6134	115.312	-1.5205	0.0011706	0.026507	NM_001362456.1	16509	Kcne1	transcript	4.13095	0.493128	3.06644	0.000339807	0.0276354
TCONS_00022951	118568312	LOC118568312	lncRNA	20.3941	0	Inf	0.000820671	0.0276354	mmu-miR-29b-2-5p	32.6134	115.312	-1.5205	0.0011706	0.026507	XM_017321605.3	27418	Mkln1	transcript	1.57045	0.0165473	6.56843	0.00103662	0.0304533
TCONS_00022951	118568312	LOC118568312	lncRNA	20.3941	0	Inf	0.000820671	0.0276354	mmu-miR-29b-2-5p	32.6134	115.312	-1.5205	0.0011706	0.026507	NM_130449.2	140792	Colec12	transcript	3.99678	3.31964	0.26781	0.00250276	0.0477182
TCONS_00022951	118568312	LOC118568312	lncRNA	20.3941	0	Inf	0.000820671	0.0276354	mmu-miR-29b-2-5p	32.6134	115.312	-1.5205	0.0011706	0.026507	TCONS_00015789	107476	Acaca	transcript	0.855672	0.031853	4.74756	0.0012857	0.0341943
TCONS_00022951	118568312	LOC118568312	lncRNA	20.3941	0	Inf	0.000820671	0.0276354	mmu-miR-29b-2-5p	32.6134	115.312	-1.5205	0.0011706	0.026507	TCONS_00002486	68295	Aar2	transcript	1.18122	0	Inf	0.000820671	0.0276354
TCONS_00022951	118568312	LOC118568312	lncRNA	20.3941	0	Inf	0.000820671	0.0276354	mmu-miR-29b-2-5p	32.6134	115.312	-1.5205	0.0011706	0.026507	XM_006517452.5	76577	Faf2	transcript	0.845375	0	Inf	0.000820671	0.0276354
TCONS_00022951	118568312	LOC118568312	lncRNA	20.3941	0	Inf	0.000820671	0.0276354	mmu-miR-29b-2-5p	32.6134	115.312	-1.5205	0.0011706	0.026507	NM_177322.3	11607	Agtr1a	transcript	16.509	9.02107	0.871884	1.52e-05	0.0155632
TCONS_00022951	118568312	LOC118568312	lncRNA	20.3941	0	Inf	0.000820671	0.0276354	mmu-miR-29b-2-5p	32.6134	115.312	-1.5205	0.0011706	0.026507	NM_001355651.1	74182	Gpcpd1	transcript	1.98661	0.186929	3.40975	0.00197354	0.041549
TCONS_00022951	118568312	LOC118568312	lncRNA	20.3941	0	Inf	0.000820671	0.0276354	mmu-miR-29b-2-5p	32.6134	115.312	-1.5205	0.0011706	0.026507	TCONS_00022742	30957	Mapk8ip3	transcript	0.033413	2.79614	-6.38688	0.000274522	0.0276354
TCONS_00022951	118568312	LOC118568312	lncRNA	20.3941	0	Inf	0.000820671	0.0276354	mmu-miR-29b-2-5p	32.6134	115.312	-1.5205	0.0011706	0.026507	NM_001110844.1	12293	Cacna2d1	transcript	0.631283	4.45131	-2.81787	0.000493731	0.0276354
TCONS_00022951	118568312	LOC118568312	lncRNA	20.3941	0	Inf	0.000820671	0.0276354	mmu-miR-29b-2-5p	32.6134	115.312	-1.5205	0.0011706	0.026507	NM_053159.4	94062	Mrpl3	transcript	20.8991	24.078	-0.204272	1.09e-05	0.0155632
TCONS_00022951	118568312	LOC118568312	lncRNA	20.3941	0	Inf	0.000820671	0.0276354	mmu-miR-29b-2-5p	32.6134	115.312	-1.5205	0.0011706	0.026507	NM_197990.3	69399	1700025G04Rik	transcript	6.52172	2.62541	1.31271	0.000479421	0.0276354
TCONS_00022951	118568312	LOC118568312	lncRNA	20.3941	0	Inf	0.000820671	0.0276354	mmu-miR-29b-2-5p	32.6134	115.312	-1.5205	0.0011706	0.026507	TCONS_00000054	13518	Dst	transcript	5.41743	0.414156	3.70936	0.00225289	0.0446545
TCONS_00022951	118568312	LOC118568312	lncRNA	20.3941	0	Inf	0.000820671	0.0276354	mmu-miR-29b-2-5p	32.6134	115.312	-1.5205	0.0011706	0.026507	NM_009195.3	20498	Slc12a4	transcript	6.17795	9.86484	-0.675168	0.00251823	0.0478546
TCONS_00022951	118568312	LOC118568312	lncRNA	20.3941	0	Inf	0.000820671	0.0276354	mmu-miR-29b-2-5p	32.6134	115.312	-1.5205	0.0011706	0.026507	NM_001289702.1	83679	Pde4dip	transcript	26.0448	32.6548	-0.326299	0.00157065	0.0372453
TCONS_00022951	118568312	LOC118568312	lncRNA	20.3941	0	Inf	0.000820671	0.0276354	mmu-miR-29b-2-5p	32.6134	115.312	-1.5205	0.0011706	0.026507	NM_013651.4	20222	Sf3a2	transcript	0.17961	7.15197	-5.3154	0.00174107	0.0385677
TCONS_00022951	118568312	LOC118568312	lncRNA	20.3941	0	Inf	0.000820671	0.0276354	mmu-miR-29b-2-5p	32.6134	115.312	-1.5205	0.0011706	0.026507	TCONS_00020910	223697	Sun2	transcript	2.54478	0	Inf	0.000820671	0.0276354
TCONS_00022951	118568312	LOC118568312	lncRNA	20.3941	0	Inf	0.000820671	0.0276354	mmu-miR-29b-2-5p	32.6134	115.312	-1.5205	0.0011706	0.026507	XM_036165784.1	12321	Calu	transcript	10.5439	16.3948	-0.636826	0.00157708	0.0372453
TCONS_00022951	118568312	LOC118568312	lncRNA	20.3941	0	Inf	0.000820671	0.0276354	mmu-miR-29b-2-5p	32.6134	115.312	-1.5205	0.0011706	0.026507	NM_019694.2	56384	Letm1	transcript	5.73717	11.2145	-0.966953	0.000238425	0.0276354
TCONS_00022951	118568312	LOC118568312	lncRNA	20.3941	0	Inf	0.000820671	0.0276354	mmu-miR-29b-2-5p	32.6134	115.312	-1.5205	0.0011706	0.026507	TCONS_00023547	72124	Seh1l	transcript	2.33466	0.0211037	6.78958	0.000969142	0.0297987
TCONS_00022951	118568312	LOC118568312	lncRNA	20.3941	0	Inf	0.000820671	0.0276354	mmu-miR-29b-2-5p	32.6134	115.312	-1.5205	0.0011706	0.026507	NM_009647.5	11639	Ak4	transcript	3.29582	0.0275303	6.90347	0.00015385	0.0276354
TCONS_00022951	118568312	LOC118568312	lncRNA	20.3941	0	Inf	0.000820671	0.0276354	mmu-miR-29b-2-5p	32.6134	115.312	-1.5205	0.0011706	0.026507	NM_010516.2	16007	Ccn1	transcript	11.8013	25.7037	-1.12303	0.00153723	0.0369578
TCONS_00022951	118568312	LOC118568312	lncRNA	20.3941	0	Inf	0.000820671	0.0276354	mmu-miR-29b-2-5p	32.6134	115.312	-1.5205	0.0011706	0.026507	NM_027558.1	70804	Pgrmc2	transcript	13.5548	8.47909	0.676825	0.000359363	0.0276354
TCONS_00022951	118568312	LOC118568312	lncRNA	20.3941	0	Inf	0.000820671	0.0276354	mmu-miR-29b-2-5p	32.6134	115.312	-1.5205	0.0011706	0.026507	NM_008681.2	17988	Ndrg1	transcript	13.4879	7.27813	0.890022	0.00249471	0.0476436
TCONS_00022951	118568312	LOC118568312	lncRNA	20.3941	0	Inf	0.000820671	0.0276354	mmu-miR-29b-2-5p	32.6134	115.312	-1.5205	0.0011706	0.026507	NM_008608.4	17387	Mmp14	transcript	4.99864	1.90388	1.39259	0.00209356	0.0430152
TCONS_00022951	118568312	LOC118568312	lncRNA	20.3941	0	Inf	0.000820671	0.0276354	mmu-miR-29b-2-5p	32.6134	115.312	-1.5205	0.0011706	0.026507	NM_026275.4	67615	Ube2r2	transcript	5.99431	0.341337	4.13433	0.000853945	0.0281337
TCONS_00022951	118568312	LOC118568312	lncRNA	20.3941	0	Inf	0.000820671	0.0276354	mmu-miR-29b-2-5p	32.6134	115.312	-1.5205	0.0011706	0.026507	NM_025987.3	67130	Ndufa6	transcript	145.358	177.624	-0.28922	0.000487275	0.0276354
TCONS_00022951	118568312	LOC118568312	lncRNA	20.3941	0	Inf	0.000820671	0.0276354	mmu-miR-29b-2-5p	32.6134	115.312	-1.5205	0.0011706	0.026507	NM_175523.5	243382	Ppm1k	transcript	41.3824	25.3879	0.704875	0.000348613	0.0276354
TCONS_00022951	118568312	LOC118568312	lncRNA	20.3941	0	Inf	0.000820671	0.0276354	mmu-miR-29b-2-5p	32.6134	115.312	-1.5205	0.0011706	0.026507	XM_006534523.2	79566	Sh3bp5l	transcript	1.99289	0.00804	7.95345	0.000614637	0.0276354
TCONS_00022951	118568312	LOC118568312	lncRNA	20.3941	0	Inf	0.000820671	0.0276354	mmu-miR-29b-2-5p	32.6134	115.312	-1.5205	0.0011706	0.026507	TCONS_00023376	19290	Pura	transcript	2.15409	0.008678	7.9555	0.00096005	0.0297987
TCONS_00022951	118568312	LOC118568312	lncRNA	20.3941	0	Inf	0.000820671	0.0276354	mmu-miR-29b-2-5p	32.6134	115.312	-1.5205	0.0011706	0.026507	NM_033322.3	93730	Lztfl1	transcript	1.35882	2.78852	-1.03715	0.00093363	0.0292165
TCONS_00022951	118568312	LOC118568312	lncRNA	20.3941	0	Inf	0.000820671	0.0276354	mmu-miR-29b-2-5p	32.6134	115.312	-1.5205	0.0011706	0.026507	NM_029182.1	75141	Rasd2	transcript	5.28095	1.10421	2.25778	0.00103307	0.0304533
TCONS_00022951	118568312	LOC118568312	lncRNA	20.3941	0	Inf	0.000820671	0.0276354	mmu-miR-29b-2-5p	32.6134	115.312	-1.5205	0.0011706	0.026507	NM_001169577.1	22214	Ube2h	transcript	1.41218	0.0643033	4.45689	0.00189306	0.0407486
TCONS_00022951	118568312	LOC118568312	lncRNA	20.3941	0	Inf	0.000820671	0.0276354	mmu-miR-29b-2-5p	32.6134	115.312	-1.5205	0.0011706	0.026507	NM_011785.4	23797	Akt3	transcript	1.5986	0.0690953	4.53208	0.0015947	0.037419
TCONS_00022951	118568312	LOC118568312	lncRNA	20.3941	0	Inf	0.000820671	0.0276354	mmu-miR-29b-2-5p	32.6134	115.312	-1.5205	0.0011706	0.026507	NM_016686.4	22344	Vezf1	transcript	10.1809	9.06881	0.166877	0.0015653	0.0372453
TCONS_00022951	118568312	LOC118568312	lncRNA	20.3941	0	Inf	0.000820671	0.0276354	mmu-miR-29b-2-5p	32.6134	115.312	-1.5205	0.0011706	0.026507	XM_036165926.1	18575	Pde1c	transcript	2.25441	0.005907	8.57611	0.000698786	0.0276354
TCONS_00022951	118568312	LOC118568312	lncRNA	20.3941	0	Inf	0.000820671	0.0276354	mmu-miR-29b-2-5p	32.6134	115.312	-1.5205	0.0011706	0.026507	XM_011246321.3	19043	Ppm1b	transcript	0.886711	0	Inf	0.000820671	0.0276354
TCONS_00022951	118568312	LOC118568312	lncRNA	20.3941	0	Inf	0.000820671	0.0276354	mmu-miR-29b-2-5p	32.6134	115.312	-1.5205	0.0011706	0.026507	NM_008773.4	18442	P2ry2	transcript	5.26081	6.19008	-0.234674	0.00171046	0.0383222
TCONS_00022951	118568312	LOC118568312	lncRNA	20.3941	0	Inf	0.000820671	0.0276354	mmu-miR-29b-2-5p	32.6134	115.312	-1.5205	0.0011706	0.026507	XM_006521705.3	107589	Mylk	transcript	3.13462	3.83408	-0.290594	0.00265995	0.0492416
TCONS_00022951	118568312	LOC118568312	lncRNA	20.3941	0	Inf	0.000820671	0.0276354	mmu-miR-29b-2-5p	32.6134	115.312	-1.5205	0.0011706	0.026507	TCONS_00008259	243764	Chrm2	transcript	7.92449	7.05464	0.167746	0.000185113	0.0276354
TCONS_00022951	118568312	LOC118568312	lncRNA	20.3941	0	Inf	0.000820671	0.0276354	mmu-miR-29b-2-5p	32.6134	115.312	-1.5205	0.0011706	0.026507	NM_001313983.1	21833	Thra	transcript	5.65207	2.85442	0.98558	0.00134355	0.0347693
TCONS_00022951	118568312	LOC118568312	lncRNA	20.3941	0	Inf	0.000820671	0.0276354	mmu-miR-29b-2-5p	32.6134	115.312	-1.5205	0.0011706	0.026507	NM_007624.4	12417	Cbx3	transcript	11.8227	12.4877	-0.0789428	0.000712892	0.0276354
TCONS_00022951	118568312	LOC118568312	lncRNA	20.3941	0	Inf	0.000820671	0.0276354	mmu-miR-29b-2-5p	32.6134	115.312	-1.5205	0.0011706	0.026507	NM_172635.3	225929	Patl1	transcript	2.3584	0.30042	2.97276	0.00236898	0.0462393
TCONS_00022951	118568312	LOC118568312	lncRNA	20.3941	0	Inf	0.000820671	0.0276354	mmu-miR-29b-2-5p	32.6134	115.312	-1.5205	0.0011706	0.026507	NM_144807.3	212862	Chpt1	transcript	60.0128	62.0084	-0.0471931	0.00168964	0.0382088
TCONS_00022951	118568312	LOC118568312	lncRNA	20.3941	0	Inf	0.000820671	0.0276354	mmu-miR-29b-2-5p	32.6134	115.312	-1.5205	0.0011706	0.026507	NM_010865.3	17926	Myoc	transcript	4.62467	1.26554	1.8696	0.000550435	0.0276354
TCONS_00022951	118568312	LOC118568312	lncRNA	20.3941	0	Inf	0.000820671	0.0276354	mmu-miR-29b-2-5p	32.6134	115.312	-1.5205	0.0011706	0.026507	NM_001081979.2	17257	Mecp2	transcript	3.25013	3.79955	-0.22533	0.000372863	0.0276354
TCONS_00022951	118568312	LOC118568312	lncRNA	20.3941	0	Inf	0.000820671	0.0276354	mmu-miR-29b-2-5p	32.6134	115.312	-1.5205	0.0011706	0.026507	NM_001039512.1	117198	Ivns1abp	transcript	5.9554	0	Inf	0.000820671	0.0276354
TCONS_00022951	118568312	LOC118568312	lncRNA	20.3941	0	Inf	0.000820671	0.0276354	mmu-miR-29b-2-5p	32.6134	115.312	-1.5205	0.0011706	0.026507	TCONS_00014905	216161	Sbno2	transcript	4.64735	3.20414	0.536473	0.00139977	0.0352728
TCONS_00022951	118568312	LOC118568312	lncRNA	20.3941	0	Inf	0.000820671	0.0276354	mmu-miR-29b-2-5p	32.6134	115.312	-1.5205	0.0011706	0.026507	NM_001012477.2	20315	Cxcl12	transcript	8.72303	23.6765	-1.44055	0.000741939	0.0276354
TCONS_00022951	118568312	LOC118568312	lncRNA	20.3941	0	Inf	0.000820671	0.0276354	mmu-miR-29b-2-5p	32.6134	115.312	-1.5205	0.0011706	0.026507	XM_006518707.3	19056	Ppp3cb	transcript	0.007019	4.54103	-9.33754	0.00110514	0.0316263
TCONS_00022951	118568312	LOC118568312	lncRNA	20.3941	0	Inf	0.000820671	0.0276354	mmu-miR-29b-2-5p	32.6134	115.312	-1.5205	0.0011706	0.026507	XM_030245515.2	12808	Cobl	transcript	1.22489	0.014136	6.43713	0.000731975	0.0276354
XR_867569.1	105244531	Gm40124	lncRNA	5.43055	0	Inf	0.000162748	0.0276354	mmu-miR-29b-2-5p	32.6134	115.312	-1.5205	0.0011706	0.026507	XM_036162424.1	57438	Marchf7	transcript	2.44408	0	Inf	0.000909325	0.0291578
XR_867569.1	105244531	Gm40124	lncRNA	5.43055	0	Inf	0.000162748	0.0276354	mmu-miR-29b-2-5p	32.6134	115.312	-1.5205	0.0011706	0.026507	NM_173866.4	108682	Gpt2	transcript	1.46859	5.47079	-1.89731	0.000818569	0.0276354
XR_867569.1	105244531	Gm40124	lncRNA	5.43055	0	Inf	0.000162748	0.0276354	mmu-miR-29b-2-5p	32.6134	115.312	-1.5205	0.0011706	0.026507	NM_001163379.1	55979	Agpat1	transcript	14.6579	11.2463	0.382229	0.000825619	0.0277196
XR_867569.1	105244531	Gm40124	lncRNA	5.43055	0	Inf	0.000162748	0.0276354	mmu-miR-29b-2-5p	32.6134	115.312	-1.5205	0.0011706	0.026507	TCONS_00025423	66158	Rtl8a	transcript	1.29636	0	Inf	0.000820671	0.0276354
XR_867569.1	105244531	Gm40124	lncRNA	5.43055	0	Inf	0.000162748	0.0276354	mmu-miR-29b-2-5p	32.6134	115.312	-1.5205	0.0011706	0.026507	XM_006524674.5	56468	Socs5	transcript	2.99592	0.0603897	5.63255	0.000527102	0.0276354
XR_867569.1	105244531	Gm40124	lncRNA	5.43055	0	Inf	0.000162748	0.0276354	mmu-miR-29b-2-5p	32.6134	115.312	-1.5205	0.0011706	0.026507	NM_177411.4	19344	Rab5b	transcript	15.3906	17.862	-0.214852	0.000321654	0.0276354
XR_867569.1	105244531	Gm40124	lncRNA	5.43055	0	Inf	0.000162748	0.0276354	mmu-miR-29b-2-5p	32.6134	115.312	-1.5205	0.0011706	0.026507	TCONS_00017675	68519	Eml1	transcript	11.0496	10.9045	0.0190772	0.00239943	0.0465183
XR_867569.1	105244531	Gm40124	lncRNA	5.43055	0	Inf	0.000162748	0.0276354	mmu-miR-29b-2-5p	32.6134	115.312	-1.5205	0.0011706	0.026507	NM_027859.3	71673	Rnf215	transcript	2.26533	2.64791	-0.22513	0.00109052	0.0314747
XR_867569.1	105244531	Gm40124	lncRNA	5.43055	0	Inf	0.000162748	0.0276354	mmu-miR-29b-2-5p	32.6134	115.312	-1.5205	0.0011706	0.026507	NM_016709.2	11992	Auh	transcript	23.1108	25.9264	-0.165855	0.00124159	0.0335637
XR_867569.1	105244531	Gm40124	lncRNA	5.43055	0	Inf	0.000162748	0.0276354	mmu-miR-29b-2-5p	32.6134	115.312	-1.5205	0.0011706	0.026507	XM_030255147.2	381290	Atp2b4	transcript	1.79149	0	Inf	0.000233871	0.0276354
XR_867569.1	105244531	Gm40124	lncRNA	5.43055	0	Inf	0.000162748	0.0276354	mmu-miR-29b-2-5p	32.6134	115.312	-1.5205	0.0011706	0.026507	NM_001359505.1	77521	Mtus2	transcript	30.9488	21.1013	0.552555	0.000558842	0.0276354
XR_867569.1	105244531	Gm40124	lncRNA	5.43055	0	Inf	0.000162748	0.0276354	mmu-miR-29b-2-5p	32.6134	115.312	-1.5205	0.0011706	0.026507	NM_001253814.1	71782	Ankle2	transcript	7.72172	4.99246	0.629172	0.00187625	0.0405382
XR_867569.1	105244531	Gm40124	lncRNA	5.43055	0	Inf	0.000162748	0.0276354	mmu-miR-29b-2-5p	32.6134	115.312	-1.5205	0.0011706	0.026507	TCONS_00024982	22284	Usp9x	transcript	4.42644	0.000426333	13.3419	0.000818366	0.0276354
XR_867569.1	105244531	Gm40124	lncRNA	5.43055	0	Inf	0.000162748	0.0276354	mmu-miR-29b-2-5p	32.6134	115.312	-1.5205	0.0011706	0.026507	NM_145562.2	231440	Parm1	transcript	37.5905	24.2018	0.635253	0.00139782	0.0352728
XR_867569.1	105244531	Gm40124	lncRNA	5.43055	0	Inf	0.000162748	0.0276354	mmu-miR-29b-2-5p	32.6134	115.312	-1.5205	0.0011706	0.026507	NM_009818.1	12385	Ctnna1	transcript	89.2245	90.2244	-0.0160775	0.000857497	0.0281337
XR_867569.1	105244531	Gm40124	lncRNA	5.43055	0	Inf	0.000162748	0.0276354	mmu-miR-29b-2-5p	32.6134	115.312	-1.5205	0.0011706	0.026507	NM_019774.5	56399	Akap8	transcript	4.41498	4.61893	-0.0651514	0.0020109	0.0420282
XR_867569.1	105244531	Gm40124	lncRNA	5.43055	0	Inf	0.000162748	0.0276354	mmu-miR-29b-2-5p	32.6134	115.312	-1.5205	0.0011706	0.026507	NM_001017429.2	12856	Cox17	transcript	100.01	129.573	-0.373622	0.00264968	0.0491363
XR_867569.1	105244531	Gm40124	lncRNA	5.43055	0	Inf	0.000162748	0.0276354	mmu-miR-29b-2-5p	32.6134	115.312	-1.5205	0.0011706	0.026507	NM_025824.4	66882	Bzw1	transcript	17.9692	13.9017	0.370267	0.00246002	0.0472596
XR_867569.1	105244531	Gm40124	lncRNA	5.43055	0	Inf	0.000162748	0.0276354	mmu-miR-29b-2-5p	32.6134	115.312	-1.5205	0.0011706	0.026507	TCONS_00018780	56705	Ranbp9	transcript	4.50464	0	Inf	0.000820671	0.0276354
XR_867569.1	105244531	Gm40124	lncRNA	5.43055	0	Inf	0.000162748	0.0276354	mmu-miR-29b-2-5p	32.6134	115.312	-1.5205	0.0011706	0.026507	TCONS_00020016	65246	Xpo7	transcript	4.13029	0.00722533	9.15896	0.00116536	0.0326432
XR_867569.1	105244531	Gm40124	lncRNA	5.43055	0	Inf	0.000162748	0.0276354	mmu-miR-29b-2-5p	32.6134	115.312	-1.5205	0.0011706	0.026507	NM_001083919.1	241431	Xirp2	transcript	71.3789	94.7049	-0.407941	0.000357728	0.0276354
XR_867569.1	105244531	Gm40124	lncRNA	5.43055	0	Inf	0.000162748	0.0276354	mmu-miR-29b-2-5p	32.6134	115.312	-1.5205	0.0011706	0.026507	NM_001098225.2	11496	Adam22	transcript	2.58778	0.00525567	8.94362	2.29e-06	0.0151166
XR_867569.1	105244531	Gm40124	lncRNA	5.43055	0	Inf	0.000162748	0.0276354	mmu-miR-29b-2-5p	32.6134	115.312	-1.5205	0.0011706	0.026507	XM_006518778.1	211922	Dennd6a	transcript	0.97065	0.0248183	5.28947	0.00216379	0.0438208
XR_867569.1	105244531	Gm40124	lncRNA	5.43055	0	Inf	0.000162748	0.0276354	mmu-miR-29b-2-5p	32.6134	115.312	-1.5205	0.0011706	0.026507	NM_133831.3	68077	Nop53	transcript	25.343	23.991	0.0790944	0.000321251	0.0276354
XR_867569.1	105244531	Gm40124	lncRNA	5.43055	0	Inf	0.000162748	0.0276354	mmu-miR-29b-2-5p	32.6134	115.312	-1.5205	0.0011706	0.026507	TCONS_00022043	20656	Sod2	transcript	6.07359	0.19545	4.95768	0.0002461	0.0276354
XR_867569.1	105244531	Gm40124	lncRNA	5.43055	0	Inf	0.000162748	0.0276354	mmu-miR-29b-2-5p	32.6134	115.312	-1.5205	0.0011706	0.026507	TCONS_00004132	229663	Csde1	transcript	48.2189	63.0905	-0.387826	0.0012973	0.0342571
XR_867569.1	105244531	Gm40124	lncRNA	5.43055	0	Inf	0.000162748	0.0276354	mmu-miR-29b-2-5p	32.6134	115.312	-1.5205	0.0011706	0.026507	TCONS_00021414	56637	Gsk3b	transcript	3.22604	0	Inf	0.000820671	0.0276354
XR_867569.1	105244531	Gm40124	lncRNA	5.43055	0	Inf	0.000162748	0.0276354	mmu-miR-29b-2-5p	32.6134	115.312	-1.5205	0.0011706	0.026507	XM_017316846.2	106393	Srl	transcript	1.95815	3.58796	-0.873667	3.65e-05	0.0155632
XR_867569.1	105244531	Gm40124	lncRNA	5.43055	0	Inf	0.000162748	0.0276354	mmu-miR-29b-2-5p	32.6134	115.312	-1.5205	0.0011706	0.026507	XM_030249575.2	18607	Pdpk1	transcript	3.59523	0	Inf	2.05e-05	0.0155632
XR_867569.1	105244531	Gm40124	lncRNA	5.43055	0	Inf	0.000162748	0.0276354	mmu-miR-29b-2-5p	32.6134	115.312	-1.5205	0.0011706	0.026507	TCONS_00002822	67512	Agpat2	transcript	1.95082	0	Inf	0.000820671	0.0276354
XR_867569.1	105244531	Gm40124	lncRNA	5.43055	0	Inf	0.000162748	0.0276354	mmu-miR-29b-2-5p	32.6134	115.312	-1.5205	0.0011706	0.026507	NM_001081242.2	70549	Tln2	transcript	2.63951	0.0295667	6.48015	0.000371777	0.0276354
XR_867569.1	105244531	Gm40124	lncRNA	5.43055	0	Inf	0.000162748	0.0276354	mmu-miR-29b-2-5p	32.6134	115.312	-1.5205	0.0011706	0.026507	TCONS_00012867	214897	Csnk1g1	transcript	0.820922	0.006047	7.08488	0.000423387	0.0276354
XR_867569.1	105244531	Gm40124	lncRNA	5.43055	0	Inf	0.000162748	0.0276354	mmu-miR-29b-2-5p	32.6134	115.312	-1.5205	0.0011706	0.026507	NM_001362722.1	74103	Nebl	transcript	26.0163	0	Inf	2.74e-05	0.0155632
XR_867569.1	105244531	Gm40124	lncRNA	5.43055	0	Inf	0.000162748	0.0276354	mmu-miR-29b-2-5p	32.6134	115.312	-1.5205	0.0011706	0.026507	NM_199468.2	213436	Rtl3	transcript	2.36875	0.177523	3.73804	0.000371092	0.0276354
XR_867569.1	105244531	Gm40124	lncRNA	5.43055	0	Inf	0.000162748	0.0276354	mmu-miR-29b-2-5p	32.6134	115.312	-1.5205	0.0011706	0.026507	NM_001362456.1	16509	Kcne1	transcript	4.13095	0.493128	3.06644	0.000339807	0.0276354
XR_867569.1	105244531	Gm40124	lncRNA	5.43055	0	Inf	0.000162748	0.0276354	mmu-miR-29b-2-5p	32.6134	115.312	-1.5205	0.0011706	0.026507	XM_017321605.3	27418	Mkln1	transcript	1.57045	0.0165473	6.56843	0.00103662	0.0304533
XR_867569.1	105244531	Gm40124	lncRNA	5.43055	0	Inf	0.000162748	0.0276354	mmu-miR-29b-2-5p	32.6134	115.312	-1.5205	0.0011706	0.026507	NM_130449.2	140792	Colec12	transcript	3.99678	3.31964	0.26781	0.00250276	0.0477182
XR_867569.1	105244531	Gm40124	lncRNA	5.43055	0	Inf	0.000162748	0.0276354	mmu-miR-29b-2-5p	32.6134	115.312	-1.5205	0.0011706	0.026507	TCONS_00015789	107476	Acaca	transcript	0.855672	0.031853	4.74756	0.0012857	0.0341943
XR_867569.1	105244531	Gm40124	lncRNA	5.43055	0	Inf	0.000162748	0.0276354	mmu-miR-29b-2-5p	32.6134	115.312	-1.5205	0.0011706	0.026507	TCONS_00002486	68295	Aar2	transcript	1.18122	0	Inf	0.000820671	0.0276354
XR_867569.1	105244531	Gm40124	lncRNA	5.43055	0	Inf	0.000162748	0.0276354	mmu-miR-29b-2-5p	32.6134	115.312	-1.5205	0.0011706	0.026507	XM_006517452.5	76577	Faf2	transcript	0.845375	0	Inf	0.000820671	0.0276354
XR_867569.1	105244531	Gm40124	lncRNA	5.43055	0	Inf	0.000162748	0.0276354	mmu-miR-29b-2-5p	32.6134	115.312	-1.5205	0.0011706	0.026507	NM_177322.3	11607	Agtr1a	transcript	16.509	9.02107	0.871884	1.52e-05	0.0155632
XR_867569.1	105244531	Gm40124	lncRNA	5.43055	0	Inf	0.000162748	0.0276354	mmu-miR-29b-2-5p	32.6134	115.312	-1.5205	0.0011706	0.026507	NM_001355651.1	74182	Gpcpd1	transcript	1.98661	0.186929	3.40975	0.00197354	0.041549
XR_867569.1	105244531	Gm40124	lncRNA	5.43055	0	Inf	0.000162748	0.0276354	mmu-miR-29b-2-5p	32.6134	115.312	-1.5205	0.0011706	0.026507	TCONS_00022742	30957	Mapk8ip3	transcript	0.033413	2.79614	-6.38688	0.000274522	0.0276354
XR_867569.1	105244531	Gm40124	lncRNA	5.43055	0	Inf	0.000162748	0.0276354	mmu-miR-29b-2-5p	32.6134	115.312	-1.5205	0.0011706	0.026507	NM_001110844.1	12293	Cacna2d1	transcript	0.631283	4.45131	-2.81787	0.000493731	0.0276354
XR_867569.1	105244531	Gm40124	lncRNA	5.43055	0	Inf	0.000162748	0.0276354	mmu-miR-29b-2-5p	32.6134	115.312	-1.5205	0.0011706	0.026507	NM_053159.4	94062	Mrpl3	transcript	20.8991	24.078	-0.204272	1.09e-05	0.0155632
XR_867569.1	105244531	Gm40124	lncRNA	5.43055	0	Inf	0.000162748	0.0276354	mmu-miR-29b-2-5p	32.6134	115.312	-1.5205	0.0011706	0.026507	NM_197990.3	69399	1700025G04Rik	transcript	6.52172	2.62541	1.31271	0.000479421	0.0276354
XR_867569.1	105244531	Gm40124	lncRNA	5.43055	0	Inf	0.000162748	0.0276354	mmu-miR-29b-2-5p	32.6134	115.312	-1.5205	0.0011706	0.026507	TCONS_00000054	13518	Dst	transcript	5.41743	0.414156	3.70936	0.00225289	0.0446545
XR_867569.1	105244531	Gm40124	lncRNA	5.43055	0	Inf	0.000162748	0.0276354	mmu-miR-29b-2-5p	32.6134	115.312	-1.5205	0.0011706	0.026507	NM_009195.3	20498	Slc12a4	transcript	6.17795	9.86484	-0.675168	0.00251823	0.0478546
XR_867569.1	105244531	Gm40124	lncRNA	5.43055	0	Inf	0.000162748	0.0276354	mmu-miR-29b-2-5p	32.6134	115.312	-1.5205	0.0011706	0.026507	NM_001289702.1	83679	Pde4dip	transcript	26.0448	32.6548	-0.326299	0.00157065	0.0372453
XR_867569.1	105244531	Gm40124	lncRNA	5.43055	0	Inf	0.000162748	0.0276354	mmu-miR-29b-2-5p	32.6134	115.312	-1.5205	0.0011706	0.026507	NM_013651.4	20222	Sf3a2	transcript	0.17961	7.15197	-5.3154	0.00174107	0.0385677
XR_867569.1	105244531	Gm40124	lncRNA	5.43055	0	Inf	0.000162748	0.0276354	mmu-miR-29b-2-5p	32.6134	115.312	-1.5205	0.0011706	0.026507	TCONS_00020910	223697	Sun2	transcript	2.54478	0	Inf	0.000820671	0.0276354
XR_867569.1	105244531	Gm40124	lncRNA	5.43055	0	Inf	0.000162748	0.0276354	mmu-miR-29b-2-5p	32.6134	115.312	-1.5205	0.0011706	0.026507	XM_036165784.1	12321	Calu	transcript	10.5439	16.3948	-0.636826	0.00157708	0.0372453
XR_867569.1	105244531	Gm40124	lncRNA	5.43055	0	Inf	0.000162748	0.0276354	mmu-miR-29b-2-5p	32.6134	115.312	-1.5205	0.0011706	0.026507	NM_019694.2	56384	Letm1	transcript	5.73717	11.2145	-0.966953	0.000238425	0.0276354
XR_867569.1	105244531	Gm40124	lncRNA	5.43055	0	Inf	0.000162748	0.0276354	mmu-miR-29b-2-5p	32.6134	115.312	-1.5205	0.0011706	0.026507	TCONS_00023547	72124	Seh1l	transcript	2.33466	0.0211037	6.78958	0.000969142	0.0297987
XR_867569.1	105244531	Gm40124	lncRNA	5.43055	0	Inf	0.000162748	0.0276354	mmu-miR-29b-2-5p	32.6134	115.312	-1.5205	0.0011706	0.026507	NM_009647.5	11639	Ak4	transcript	3.29582	0.0275303	6.90347	0.00015385	0.0276354
XR_867569.1	105244531	Gm40124	lncRNA	5.43055	0	Inf	0.000162748	0.0276354	mmu-miR-29b-2-5p	32.6134	115.312	-1.5205	0.0011706	0.026507	NM_010516.2	16007	Ccn1	transcript	11.8013	25.7037	-1.12303	0.00153723	0.0369578
XR_867569.1	105244531	Gm40124	lncRNA	5.43055	0	Inf	0.000162748	0.0276354	mmu-miR-29b-2-5p	32.6134	115.312	-1.5205	0.0011706	0.026507	NM_027558.1	70804	Pgrmc2	transcript	13.5548	8.47909	0.676825	0.000359363	0.0276354
XR_867569.1	105244531	Gm40124	lncRNA	5.43055	0	Inf	0.000162748	0.0276354	mmu-miR-29b-2-5p	32.6134	115.312	-1.5205	0.0011706	0.026507	NM_008681.2	17988	Ndrg1	transcript	13.4879	7.27813	0.890022	0.00249471	0.0476436
XR_867569.1	105244531	Gm40124	lncRNA	5.43055	0	Inf	0.000162748	0.0276354	mmu-miR-29b-2-5p	32.6134	115.312	-1.5205	0.0011706	0.026507	NM_008608.4	17387	Mmp14	transcript	4.99864	1.90388	1.39259	0.00209356	0.0430152
XR_867569.1	105244531	Gm40124	lncRNA	5.43055	0	Inf	0.000162748	0.0276354	mmu-miR-29b-2-5p	32.6134	115.312	-1.5205	0.0011706	0.026507	NM_026275.4	67615	Ube2r2	transcript	5.99431	0.341337	4.13433	0.000853945	0.0281337
XR_867569.1	105244531	Gm40124	lncRNA	5.43055	0	Inf	0.000162748	0.0276354	mmu-miR-29b-2-5p	32.6134	115.312	-1.5205	0.0011706	0.026507	NM_025987.3	67130	Ndufa6	transcript	145.358	177.624	-0.28922	0.000487275	0.0276354
XR_867569.1	105244531	Gm40124	lncRNA	5.43055	0	Inf	0.000162748	0.0276354	mmu-miR-29b-2-5p	32.6134	115.312	-1.5205	0.0011706	0.026507	NM_175523.5	243382	Ppm1k	transcript	41.3824	25.3879	0.704875	0.000348613	0.0276354
XR_867569.1	105244531	Gm40124	lncRNA	5.43055	0	Inf	0.000162748	0.0276354	mmu-miR-29b-2-5p	32.6134	115.312	-1.5205	0.0011706	0.026507	XM_006534523.2	79566	Sh3bp5l	transcript	1.99289	0.00804	7.95345	0.000614637	0.0276354
XR_867569.1	105244531	Gm40124	lncRNA	5.43055	0	Inf	0.000162748	0.0276354	mmu-miR-29b-2-5p	32.6134	115.312	-1.5205	0.0011706	0.026507	TCONS_00023376	19290	Pura	transcript	2.15409	0.008678	7.9555	0.00096005	0.0297987
XR_867569.1	105244531	Gm40124	lncRNA	5.43055	0	Inf	0.000162748	0.0276354	mmu-miR-29b-2-5p	32.6134	115.312	-1.5205	0.0011706	0.026507	NM_033322.3	93730	Lztfl1	transcript	1.35882	2.78852	-1.03715	0.00093363	0.0292165
XR_867569.1	105244531	Gm40124	lncRNA	5.43055	0	Inf	0.000162748	0.0276354	mmu-miR-29b-2-5p	32.6134	115.312	-1.5205	0.0011706	0.026507	NM_029182.1	75141	Rasd2	transcript	5.28095	1.10421	2.25778	0.00103307	0.0304533
XR_867569.1	105244531	Gm40124	lncRNA	5.43055	0	Inf	0.000162748	0.0276354	mmu-miR-29b-2-5p	32.6134	115.312	-1.5205	0.0011706	0.026507	NM_001169577.1	22214	Ube2h	transcript	1.41218	0.0643033	4.45689	0.00189306	0.0407486
XR_867569.1	105244531	Gm40124	lncRNA	5.43055	0	Inf	0.000162748	0.0276354	mmu-miR-29b-2-5p	32.6134	115.312	-1.5205	0.0011706	0.026507	NM_011785.4	23797	Akt3	transcript	1.5986	0.0690953	4.53208	0.0015947	0.037419
XR_867569.1	105244531	Gm40124	lncRNA	5.43055	0	Inf	0.000162748	0.0276354	mmu-miR-29b-2-5p	32.6134	115.312	-1.5205	0.0011706	0.026507	NM_016686.4	22344	Vezf1	transcript	10.1809	9.06881	0.166877	0.0015653	0.0372453
XR_867569.1	105244531	Gm40124	lncRNA	5.43055	0	Inf	0.000162748	0.0276354	mmu-miR-29b-2-5p	32.6134	115.312	-1.5205	0.0011706	0.026507	XM_036165926.1	18575	Pde1c	transcript	2.25441	0.005907	8.57611	0.000698786	0.0276354
XR_867569.1	105244531	Gm40124	lncRNA	5.43055	0	Inf	0.000162748	0.0276354	mmu-miR-29b-2-5p	32.6134	115.312	-1.5205	0.0011706	0.026507	XM_011246321.3	19043	Ppm1b	transcript	0.886711	0	Inf	0.000820671	0.0276354
XR_867569.1	105244531	Gm40124	lncRNA	5.43055	0	Inf	0.000162748	0.0276354	mmu-miR-29b-2-5p	32.6134	115.312	-1.5205	0.0011706	0.026507	NM_008773.4	18442	P2ry2	transcript	5.26081	6.19008	-0.234674	0.00171046	0.0383222
XR_867569.1	105244531	Gm40124	lncRNA	5.43055	0	Inf	0.000162748	0.0276354	mmu-miR-29b-2-5p	32.6134	115.312	-1.5205	0.0011706	0.026507	XM_006521705.3	107589	Mylk	transcript	3.13462	3.83408	-0.290594	0.00265995	0.0492416
XR_867569.1	105244531	Gm40124	lncRNA	5.43055	0	Inf	0.000162748	0.0276354	mmu-miR-29b-2-5p	32.6134	115.312	-1.5205	0.0011706	0.026507	TCONS_00008259	243764	Chrm2	transcript	7.92449	7.05464	0.167746	0.000185113	0.0276354
XR_867569.1	105244531	Gm40124	lncRNA	5.43055	0	Inf	0.000162748	0.0276354	mmu-miR-29b-2-5p	32.6134	115.312	-1.5205	0.0011706	0.026507	NM_001313983.1	21833	Thra	transcript	5.65207	2.85442	0.98558	0.00134355	0.0347693
XR_867569.1	105244531	Gm40124	lncRNA	5.43055	0	Inf	0.000162748	0.0276354	mmu-miR-29b-2-5p	32.6134	115.312	-1.5205	0.0011706	0.026507	NM_007624.4	12417	Cbx3	transcript	11.8227	12.4877	-0.0789428	0.000712892	0.0276354
XR_867569.1	105244531	Gm40124	lncRNA	5.43055	0	Inf	0.000162748	0.0276354	mmu-miR-29b-2-5p	32.6134	115.312	-1.5205	0.0011706	0.026507	NM_172635.3	225929	Patl1	transcript	2.3584	0.30042	2.97276	0.00236898	0.0462393
XR_867569.1	105244531	Gm40124	lncRNA	5.43055	0	Inf	0.000162748	0.0276354	mmu-miR-29b-2-5p	32.6134	115.312	-1.5205	0.0011706	0.026507	NM_144807.3	212862	Chpt1	transcript	60.0128	62.0084	-0.0471931	0.00168964	0.0382088
XR_867569.1	105244531	Gm40124	lncRNA	5.43055	0	Inf	0.000162748	0.0276354	mmu-miR-29b-2-5p	32.6134	115.312	-1.5205	0.0011706	0.026507	NM_010865.3	17926	Myoc	transcript	4.62467	1.26554	1.8696	0.000550435	0.0276354
XR_867569.1	105244531	Gm40124	lncRNA	5.43055	0	Inf	0.000162748	0.0276354	mmu-miR-29b-2-5p	32.6134	115.312	-1.5205	0.0011706	0.026507	NM_001081979.2	17257	Mecp2	transcript	3.25013	3.79955	-0.22533	0.000372863	0.0276354
XR_867569.1	105244531	Gm40124	lncRNA	5.43055	0	Inf	0.000162748	0.0276354	mmu-miR-29b-2-5p	32.6134	115.312	-1.5205	0.0011706	0.026507	NM_001039512.1	117198	Ivns1abp	transcript	5.9554	0	Inf	0.000820671	0.0276354
XR_867569.1	105244531	Gm40124	lncRNA	5.43055	0	Inf	0.000162748	0.0276354	mmu-miR-29b-2-5p	32.6134	115.312	-1.5205	0.0011706	0.026507	TCONS_00014905	216161	Sbno2	transcript	4.64735	3.20414	0.536473	0.00139977	0.0352728
XR_867569.1	105244531	Gm40124	lncRNA	5.43055	0	Inf	0.000162748	0.0276354	mmu-miR-29b-2-5p	32.6134	115.312	-1.5205	0.0011706	0.026507	NM_001012477.2	20315	Cxcl12	transcript	8.72303	23.6765	-1.44055	0.000741939	0.0276354
XR_867569.1	105244531	Gm40124	lncRNA	5.43055	0	Inf	0.000162748	0.0276354	mmu-miR-29b-2-5p	32.6134	115.312	-1.5205	0.0011706	0.026507	XM_006518707.3	19056	Ppp3cb	transcript	0.007019	4.54103	-9.33754	0.00110514	0.0316263
XR_867569.1	105244531	Gm40124	lncRNA	5.43055	0	Inf	0.000162748	0.0276354	mmu-miR-29b-2-5p	32.6134	115.312	-1.5205	0.0011706	0.026507	XM_030245515.2	12808	Cobl	transcript	1.22489	0.014136	6.43713	0.000731975	0.0276354
TCONS_00023682	12558	Cdh2	lncRNA	5.50214	3.05558	0.848547	0.00218381	0.0438821	mmu-miR-29b-2-5p	32.6134	115.312	-1.5205	0.0011706	0.026507	XM_036162424.1	57438	Marchf7	transcript	2.44408	0	Inf	0.000909325	0.0291578
TCONS_00023682	12558	Cdh2	lncRNA	5.50214	3.05558	0.848547	0.00218381	0.0438821	mmu-miR-29b-2-5p	32.6134	115.312	-1.5205	0.0011706	0.026507	NM_173866.4	108682	Gpt2	transcript	1.46859	5.47079	-1.89731	0.000818569	0.0276354
TCONS_00023682	12558	Cdh2	lncRNA	5.50214	3.05558	0.848547	0.00218381	0.0438821	mmu-miR-29b-2-5p	32.6134	115.312	-1.5205	0.0011706	0.026507	NM_001163379.1	55979	Agpat1	transcript	14.6579	11.2463	0.382229	0.000825619	0.0277196
TCONS_00023682	12558	Cdh2	lncRNA	5.50214	3.05558	0.848547	0.00218381	0.0438821	mmu-miR-29b-2-5p	32.6134	115.312	-1.5205	0.0011706	0.026507	TCONS_00025423	66158	Rtl8a	transcript	1.29636	0	Inf	0.000820671	0.0276354
TCONS_00023682	12558	Cdh2	lncRNA	5.50214	3.05558	0.848547	0.00218381	0.0438821	mmu-miR-29b-2-5p	32.6134	115.312	-1.5205	0.0011706	0.026507	XM_006524674.5	56468	Socs5	transcript	2.99592	0.0603897	5.63255	0.000527102	0.0276354
TCONS_00023682	12558	Cdh2	lncRNA	5.50214	3.05558	0.848547	0.00218381	0.0438821	mmu-miR-29b-2-5p	32.6134	115.312	-1.5205	0.0011706	0.026507	NM_177411.4	19344	Rab5b	transcript	15.3906	17.862	-0.214852	0.000321654	0.0276354
TCONS_00023682	12558	Cdh2	lncRNA	5.50214	3.05558	0.848547	0.00218381	0.0438821	mmu-miR-29b-2-5p	32.6134	115.312	-1.5205	0.0011706	0.026507	TCONS_00017675	68519	Eml1	transcript	11.0496	10.9045	0.0190772	0.00239943	0.0465183
TCONS_00023682	12558	Cdh2	lncRNA	5.50214	3.05558	0.848547	0.00218381	0.0438821	mmu-miR-29b-2-5p	32.6134	115.312	-1.5205	0.0011706	0.026507	NM_027859.3	71673	Rnf215	transcript	2.26533	2.64791	-0.22513	0.00109052	0.0314747
TCONS_00023682	12558	Cdh2	lncRNA	5.50214	3.05558	0.848547	0.00218381	0.0438821	mmu-miR-29b-2-5p	32.6134	115.312	-1.5205	0.0011706	0.026507	NM_016709.2	11992	Auh	transcript	23.1108	25.9264	-0.165855	0.00124159	0.0335637
TCONS_00023682	12558	Cdh2	lncRNA	5.50214	3.05558	0.848547	0.00218381	0.0438821	mmu-miR-29b-2-5p	32.6134	115.312	-1.5205	0.0011706	0.026507	XM_030255147.2	381290	Atp2b4	transcript	1.79149	0	Inf	0.000233871	0.0276354
TCONS_00023682	12558	Cdh2	lncRNA	5.50214	3.05558	0.848547	0.00218381	0.0438821	mmu-miR-29b-2-5p	32.6134	115.312	-1.5205	0.0011706	0.026507	NM_001359505.1	77521	Mtus2	transcript	30.9488	21.1013	0.552555	0.000558842	0.0276354
TCONS_00023682	12558	Cdh2	lncRNA	5.50214	3.05558	0.848547	0.00218381	0.0438821	mmu-miR-29b-2-5p	32.6134	115.312	-1.5205	0.0011706	0.026507	NM_001253814.1	71782	Ankle2	transcript	7.72172	4.99246	0.629172	0.00187625	0.0405382
TCONS_00023682	12558	Cdh2	lncRNA	5.50214	3.05558	0.848547	0.00218381	0.0438821	mmu-miR-29b-2-5p	32.6134	115.312	-1.5205	0.0011706	0.026507	TCONS_00024982	22284	Usp9x	transcript	4.42644	0.000426333	13.3419	0.000818366	0.0276354
TCONS_00023682	12558	Cdh2	lncRNA	5.50214	3.05558	0.848547	0.00218381	0.0438821	mmu-miR-29b-2-5p	32.6134	115.312	-1.5205	0.0011706	0.026507	NM_145562.2	231440	Parm1	transcript	37.5905	24.2018	0.635253	0.00139782	0.0352728
TCONS_00023682	12558	Cdh2	lncRNA	5.50214	3.05558	0.848547	0.00218381	0.0438821	mmu-miR-29b-2-5p	32.6134	115.312	-1.5205	0.0011706	0.026507	NM_009818.1	12385	Ctnna1	transcript	89.2245	90.2244	-0.0160775	0.000857497	0.0281337
TCONS_00023682	12558	Cdh2	lncRNA	5.50214	3.05558	0.848547	0.00218381	0.0438821	mmu-miR-29b-2-5p	32.6134	115.312	-1.5205	0.0011706	0.026507	NM_019774.5	56399	Akap8	transcript	4.41498	4.61893	-0.0651514	0.0020109	0.0420282
TCONS_00023682	12558	Cdh2	lncRNA	5.50214	3.05558	0.848547	0.00218381	0.0438821	mmu-miR-29b-2-5p	32.6134	115.312	-1.5205	0.0011706	0.026507	NM_001017429.2	12856	Cox17	transcript	100.01	129.573	-0.373622	0.00264968	0.0491363
TCONS_00023682	12558	Cdh2	lncRNA	5.50214	3.05558	0.848547	0.00218381	0.0438821	mmu-miR-29b-2-5p	32.6134	115.312	-1.5205	0.0011706	0.026507	NM_025824.4	66882	Bzw1	transcript	17.9692	13.9017	0.370267	0.00246002	0.0472596
TCONS_00023682	12558	Cdh2	lncRNA	5.50214	3.05558	0.848547	0.00218381	0.0438821	mmu-miR-29b-2-5p	32.6134	115.312	-1.5205	0.0011706	0.026507	TCONS_00018780	56705	Ranbp9	transcript	4.50464	0	Inf	0.000820671	0.0276354
TCONS_00023682	12558	Cdh2	lncRNA	5.50214	3.05558	0.848547	0.00218381	0.0438821	mmu-miR-29b-2-5p	32.6134	115.312	-1.5205	0.0011706	0.026507	TCONS_00020016	65246	Xpo7	transcript	4.13029	0.00722533	9.15896	0.00116536	0.0326432
TCONS_00023682	12558	Cdh2	lncRNA	5.50214	3.05558	0.848547	0.00218381	0.0438821	mmu-miR-29b-2-5p	32.6134	115.312	-1.5205	0.0011706	0.026507	NM_001083919.1	241431	Xirp2	transcript	71.3789	94.7049	-0.407941	0.000357728	0.0276354
TCONS_00023682	12558	Cdh2	lncRNA	5.50214	3.05558	0.848547	0.00218381	0.0438821	mmu-miR-29b-2-5p	32.6134	115.312	-1.5205	0.0011706	0.026507	NM_001098225.2	11496	Adam22	transcript	2.58778	0.00525567	8.94362	2.29e-06	0.0151166
TCONS_00023682	12558	Cdh2	lncRNA	5.50214	3.05558	0.848547	0.00218381	0.0438821	mmu-miR-29b-2-5p	32.6134	115.312	-1.5205	0.0011706	0.026507	XM_006518778.1	211922	Dennd6a	transcript	0.97065	0.0248183	5.28947	0.00216379	0.0438208
TCONS_00023682	12558	Cdh2	lncRNA	5.50214	3.05558	0.848547	0.00218381	0.0438821	mmu-miR-29b-2-5p	32.6134	115.312	-1.5205	0.0011706	0.026507	NM_133831.3	68077	Nop53	transcript	25.343	23.991	0.0790944	0.000321251	0.0276354
TCONS_00023682	12558	Cdh2	lncRNA	5.50214	3.05558	0.848547	0.00218381	0.0438821	mmu-miR-29b-2-5p	32.6134	115.312	-1.5205	0.0011706	0.026507	TCONS_00022043	20656	Sod2	transcript	6.07359	0.19545	4.95768	0.0002461	0.0276354
TCONS_00023682	12558	Cdh2	lncRNA	5.50214	3.05558	0.848547	0.00218381	0.0438821	mmu-miR-29b-2-5p	32.6134	115.312	-1.5205	0.0011706	0.026507	TCONS_00004132	229663	Csde1	transcript	48.2189	63.0905	-0.387826	0.0012973	0.0342571
TCONS_00023682	12558	Cdh2	lncRNA	5.50214	3.05558	0.848547	0.00218381	0.0438821	mmu-miR-29b-2-5p	32.6134	115.312	-1.5205	0.0011706	0.026507	TCONS_00021414	56637	Gsk3b	transcript	3.22604	0	Inf	0.000820671	0.0276354
TCONS_00023682	12558	Cdh2	lncRNA	5.50214	3.05558	0.848547	0.00218381	0.0438821	mmu-miR-29b-2-5p	32.6134	115.312	-1.5205	0.0011706	0.026507	XM_017316846.2	106393	Srl	transcript	1.95815	3.58796	-0.873667	3.65e-05	0.0155632
TCONS_00023682	12558	Cdh2	lncRNA	5.50214	3.05558	0.848547	0.00218381	0.0438821	mmu-miR-29b-2-5p	32.6134	115.312	-1.5205	0.0011706	0.026507	XM_030249575.2	18607	Pdpk1	transcript	3.59523	0	Inf	2.05e-05	0.0155632
TCONS_00023682	12558	Cdh2	lncRNA	5.50214	3.05558	0.848547	0.00218381	0.0438821	mmu-miR-29b-2-5p	32.6134	115.312	-1.5205	0.0011706	0.026507	TCONS_00002822	67512	Agpat2	transcript	1.95082	0	Inf	0.000820671	0.0276354
TCONS_00023682	12558	Cdh2	lncRNA	5.50214	3.05558	0.848547	0.00218381	0.0438821	mmu-miR-29b-2-5p	32.6134	115.312	-1.5205	0.0011706	0.026507	NM_001081242.2	70549	Tln2	transcript	2.63951	0.0295667	6.48015	0.000371777	0.0276354
TCONS_00023682	12558	Cdh2	lncRNA	5.50214	3.05558	0.848547	0.00218381	0.0438821	mmu-miR-29b-2-5p	32.6134	115.312	-1.5205	0.0011706	0.026507	TCONS_00012867	214897	Csnk1g1	transcript	0.820922	0.006047	7.08488	0.000423387	0.0276354
TCONS_00023682	12558	Cdh2	lncRNA	5.50214	3.05558	0.848547	0.00218381	0.0438821	mmu-miR-29b-2-5p	32.6134	115.312	-1.5205	0.0011706	0.026507	NM_001362722.1	74103	Nebl	transcript	26.0163	0	Inf	2.74e-05	0.0155632
TCONS_00023682	12558	Cdh2	lncRNA	5.50214	3.05558	0.848547	0.00218381	0.0438821	mmu-miR-29b-2-5p	32.6134	115.312	-1.5205	0.0011706	0.026507	NM_199468.2	213436	Rtl3	transcript	2.36875	0.177523	3.73804	0.000371092	0.0276354
TCONS_00023682	12558	Cdh2	lncRNA	5.50214	3.05558	0.848547	0.00218381	0.0438821	mmu-miR-29b-2-5p	32.6134	115.312	-1.5205	0.0011706	0.026507	NM_001362456.1	16509	Kcne1	transcript	4.13095	0.493128	3.06644	0.000339807	0.0276354
TCONS_00023682	12558	Cdh2	lncRNA	5.50214	3.05558	0.848547	0.00218381	0.0438821	mmu-miR-29b-2-5p	32.6134	115.312	-1.5205	0.0011706	0.026507	XM_017321605.3	27418	Mkln1	transcript	1.57045	0.0165473	6.56843	0.00103662	0.0304533
TCONS_00023682	12558	Cdh2	lncRNA	5.50214	3.05558	0.848547	0.00218381	0.0438821	mmu-miR-29b-2-5p	32.6134	115.312	-1.5205	0.0011706	0.026507	NM_130449.2	140792	Colec12	transcript	3.99678	3.31964	0.26781	0.00250276	0.0477182
TCONS_00023682	12558	Cdh2	lncRNA	5.50214	3.05558	0.848547	0.00218381	0.0438821	mmu-miR-29b-2-5p	32.6134	115.312	-1.5205	0.0011706	0.026507	TCONS_00015789	107476	Acaca	transcript	0.855672	0.031853	4.74756	0.0012857	0.0341943
TCONS_00023682	12558	Cdh2	lncRNA	5.50214	3.05558	0.848547	0.00218381	0.0438821	mmu-miR-29b-2-5p	32.6134	115.312	-1.5205	0.0011706	0.026507	TCONS_00002486	68295	Aar2	transcript	1.18122	0	Inf	0.000820671	0.0276354
TCONS_00023682	12558	Cdh2	lncRNA	5.50214	3.05558	0.848547	0.00218381	0.0438821	mmu-miR-29b-2-5p	32.6134	115.312	-1.5205	0.0011706	0.026507	XM_006517452.5	76577	Faf2	transcript	0.845375	0	Inf	0.000820671	0.0276354
TCONS_00023682	12558	Cdh2	lncRNA	5.50214	3.05558	0.848547	0.00218381	0.0438821	mmu-miR-29b-2-5p	32.6134	115.312	-1.5205	0.0011706	0.026507	NM_177322.3	11607	Agtr1a	transcript	16.509	9.02107	0.871884	1.52e-05	0.0155632
TCONS_00023682	12558	Cdh2	lncRNA	5.50214	3.05558	0.848547	0.00218381	0.0438821	mmu-miR-29b-2-5p	32.6134	115.312	-1.5205	0.0011706	0.026507	NM_001355651.1	74182	Gpcpd1	transcript	1.98661	0.186929	3.40975	0.00197354	0.041549
TCONS_00023682	12558	Cdh2	lncRNA	5.50214	3.05558	0.848547	0.00218381	0.0438821	mmu-miR-29b-2-5p	32.6134	115.312	-1.5205	0.0011706	0.026507	TCONS_00022742	30957	Mapk8ip3	transcript	0.033413	2.79614	-6.38688	0.000274522	0.0276354
TCONS_00023682	12558	Cdh2	lncRNA	5.50214	3.05558	0.848547	0.00218381	0.0438821	mmu-miR-29b-2-5p	32.6134	115.312	-1.5205	0.0011706	0.026507	NM_001110844.1	12293	Cacna2d1	transcript	0.631283	4.45131	-2.81787	0.000493731	0.0276354
TCONS_00023682	12558	Cdh2	lncRNA	5.50214	3.05558	0.848547	0.00218381	0.0438821	mmu-miR-29b-2-5p	32.6134	115.312	-1.5205	0.0011706	0.026507	NM_053159.4	94062	Mrpl3	transcript	20.8991	24.078	-0.204272	1.09e-05	0.0155632
TCONS_00023682	12558	Cdh2	lncRNA	5.50214	3.05558	0.848547	0.00218381	0.0438821	mmu-miR-29b-2-5p	32.6134	115.312	-1.5205	0.0011706	0.026507	NM_197990.3	69399	1700025G04Rik	transcript	6.52172	2.62541	1.31271	0.000479421	0.0276354
TCONS_00023682	12558	Cdh2	lncRNA	5.50214	3.05558	0.848547	0.00218381	0.0438821	mmu-miR-29b-2-5p	32.6134	115.312	-1.5205	0.0011706	0.026507	TCONS_00000054	13518	Dst	transcript	5.41743	0.414156	3.70936	0.00225289	0.0446545
TCONS_00023682	12558	Cdh2	lncRNA	5.50214	3.05558	0.848547	0.00218381	0.0438821	mmu-miR-29b-2-5p	32.6134	115.312	-1.5205	0.0011706	0.026507	NM_009195.3	20498	Slc12a4	transcript	6.17795	9.86484	-0.675168	0.00251823	0.0478546
TCONS_00023682	12558	Cdh2	lncRNA	5.50214	3.05558	0.848547	0.00218381	0.0438821	mmu-miR-29b-2-5p	32.6134	115.312	-1.5205	0.0011706	0.026507	NM_001289702.1	83679	Pde4dip	transcript	26.0448	32.6548	-0.326299	0.00157065	0.0372453
TCONS_00023682	12558	Cdh2	lncRNA	5.50214	3.05558	0.848547	0.00218381	0.0438821	mmu-miR-29b-2-5p	32.6134	115.312	-1.5205	0.0011706	0.026507	NM_013651.4	20222	Sf3a2	transcript	0.17961	7.15197	-5.3154	0.00174107	0.0385677
TCONS_00023682	12558	Cdh2	lncRNA	5.50214	3.05558	0.848547	0.00218381	0.0438821	mmu-miR-29b-2-5p	32.6134	115.312	-1.5205	0.0011706	0.026507	TCONS_00020910	223697	Sun2	transcript	2.54478	0	Inf	0.000820671	0.0276354
TCONS_00023682	12558	Cdh2	lncRNA	5.50214	3.05558	0.848547	0.00218381	0.0438821	mmu-miR-29b-2-5p	32.6134	115.312	-1.5205	0.0011706	0.026507	XM_036165784.1	12321	Calu	transcript	10.5439	16.3948	-0.636826	0.00157708	0.0372453
TCONS_00023682	12558	Cdh2	lncRNA	5.50214	3.05558	0.848547	0.00218381	0.0438821	mmu-miR-29b-2-5p	32.6134	115.312	-1.5205	0.0011706	0.026507	NM_019694.2	56384	Letm1	transcript	5.73717	11.2145	-0.966953	0.000238425	0.0276354
TCONS_00023682	12558	Cdh2	lncRNA	5.50214	3.05558	0.848547	0.00218381	0.0438821	mmu-miR-29b-2-5p	32.6134	115.312	-1.5205	0.0011706	0.026507	TCONS_00023547	72124	Seh1l	transcript	2.33466	0.0211037	6.78958	0.000969142	0.0297987
TCONS_00023682	12558	Cdh2	lncRNA	5.50214	3.05558	0.848547	0.00218381	0.0438821	mmu-miR-29b-2-5p	32.6134	115.312	-1.5205	0.0011706	0.026507	NM_009647.5	11639	Ak4	transcript	3.29582	0.0275303	6.90347	0.00015385	0.0276354
TCONS_00023682	12558	Cdh2	lncRNA	5.50214	3.05558	0.848547	0.00218381	0.0438821	mmu-miR-29b-2-5p	32.6134	115.312	-1.5205	0.0011706	0.026507	NM_010516.2	16007	Ccn1	transcript	11.8013	25.7037	-1.12303	0.00153723	0.0369578
TCONS_00023682	12558	Cdh2	lncRNA	5.50214	3.05558	0.848547	0.00218381	0.0438821	mmu-miR-29b-2-5p	32.6134	115.312	-1.5205	0.0011706	0.026507	NM_027558.1	70804	Pgrmc2	transcript	13.5548	8.47909	0.676825	0.000359363	0.0276354
TCONS_00023682	12558	Cdh2	lncRNA	5.50214	3.05558	0.848547	0.00218381	0.0438821	mmu-miR-29b-2-5p	32.6134	115.312	-1.5205	0.0011706	0.026507	NM_008681.2	17988	Ndrg1	transcript	13.4879	7.27813	0.890022	0.00249471	0.0476436
TCONS_00023682	12558	Cdh2	lncRNA	5.50214	3.05558	0.848547	0.00218381	0.0438821	mmu-miR-29b-2-5p	32.6134	115.312	-1.5205	0.0011706	0.026507	NM_008608.4	17387	Mmp14	transcript	4.99864	1.90388	1.39259	0.00209356	0.0430152
TCONS_00023682	12558	Cdh2	lncRNA	5.50214	3.05558	0.848547	0.00218381	0.0438821	mmu-miR-29b-2-5p	32.6134	115.312	-1.5205	0.0011706	0.026507	NM_026275.4	67615	Ube2r2	transcript	5.99431	0.341337	4.13433	0.000853945	0.0281337
TCONS_00023682	12558	Cdh2	lncRNA	5.50214	3.05558	0.848547	0.00218381	0.0438821	mmu-miR-29b-2-5p	32.6134	115.312	-1.5205	0.0011706	0.026507	NM_025987.3	67130	Ndufa6	transcript	145.358	177.624	-0.28922	0.000487275	0.0276354
TCONS_00023682	12558	Cdh2	lncRNA	5.50214	3.05558	0.848547	0.00218381	0.0438821	mmu-miR-29b-2-5p	32.6134	115.312	-1.5205	0.0011706	0.026507	NM_175523.5	243382	Ppm1k	transcript	41.3824	25.3879	0.704875	0.000348613	0.0276354
TCONS_00023682	12558	Cdh2	lncRNA	5.50214	3.05558	0.848547	0.00218381	0.0438821	mmu-miR-29b-2-5p	32.6134	115.312	-1.5205	0.0011706	0.026507	XM_006534523.2	79566	Sh3bp5l	transcript	1.99289	0.00804	7.95345	0.000614637	0.0276354
TCONS_00023682	12558	Cdh2	lncRNA	5.50214	3.05558	0.848547	0.00218381	0.0438821	mmu-miR-29b-2-5p	32.6134	115.312	-1.5205	0.0011706	0.026507	TCONS_00023376	19290	Pura	transcript	2.15409	0.008678	7.9555	0.00096005	0.0297987
TCONS_00023682	12558	Cdh2	lncRNA	5.50214	3.05558	0.848547	0.00218381	0.0438821	mmu-miR-29b-2-5p	32.6134	115.312	-1.5205	0.0011706	0.026507	NM_033322.3	93730	Lztfl1	transcript	1.35882	2.78852	-1.03715	0.00093363	0.0292165
TCONS_00023682	12558	Cdh2	lncRNA	5.50214	3.05558	0.848547	0.00218381	0.0438821	mmu-miR-29b-2-5p	32.6134	115.312	-1.5205	0.0011706	0.026507	NM_029182.1	75141	Rasd2	transcript	5.28095	1.10421	2.25778	0.00103307	0.0304533
TCONS_00023682	12558	Cdh2	lncRNA	5.50214	3.05558	0.848547	0.00218381	0.0438821	mmu-miR-29b-2-5p	32.6134	115.312	-1.5205	0.0011706	0.026507	NM_001169577.1	22214	Ube2h	transcript	1.41218	0.0643033	4.45689	0.00189306	0.0407486
TCONS_00023682	12558	Cdh2	lncRNA	5.50214	3.05558	0.848547	0.00218381	0.0438821	mmu-miR-29b-2-5p	32.6134	115.312	-1.5205	0.0011706	0.026507	NM_011785.4	23797	Akt3	transcript	1.5986	0.0690953	4.53208	0.0015947	0.037419
TCONS_00023682	12558	Cdh2	lncRNA	5.50214	3.05558	0.848547	0.00218381	0.0438821	mmu-miR-29b-2-5p	32.6134	115.312	-1.5205	0.0011706	0.026507	NM_016686.4	22344	Vezf1	transcript	10.1809	9.06881	0.166877	0.0015653	0.0372453
TCONS_00023682	12558	Cdh2	lncRNA	5.50214	3.05558	0.848547	0.00218381	0.0438821	mmu-miR-29b-2-5p	32.6134	115.312	-1.5205	0.0011706	0.026507	XM_036165926.1	18575	Pde1c	transcript	2.25441	0.005907	8.57611	0.000698786	0.0276354
TCONS_00023682	12558	Cdh2	lncRNA	5.50214	3.05558	0.848547	0.00218381	0.0438821	mmu-miR-29b-2-5p	32.6134	115.312	-1.5205	0.0011706	0.026507	XM_011246321.3	19043	Ppm1b	transcript	0.886711	0	Inf	0.000820671	0.0276354
TCONS_00023682	12558	Cdh2	lncRNA	5.50214	3.05558	0.848547	0.00218381	0.0438821	mmu-miR-29b-2-5p	32.6134	115.312	-1.5205	0.0011706	0.026507	NM_008773.4	18442	P2ry2	transcript	5.26081	6.19008	-0.234674	0.00171046	0.0383222
TCONS_00023682	12558	Cdh2	lncRNA	5.50214	3.05558	0.848547	0.00218381	0.0438821	mmu-miR-29b-2-5p	32.6134	115.312	-1.5205	0.0011706	0.026507	XM_006521705.3	107589	Mylk	transcript	3.13462	3.83408	-0.290594	0.00265995	0.0492416
TCONS_00023682	12558	Cdh2	lncRNA	5.50214	3.05558	0.848547	0.00218381	0.0438821	mmu-miR-29b-2-5p	32.6134	115.312	-1.5205	0.0011706	0.026507	TCONS_00008259	243764	Chrm2	transcript	7.92449	7.05464	0.167746	0.000185113	0.0276354
TCONS_00023682	12558	Cdh2	lncRNA	5.50214	3.05558	0.848547	0.00218381	0.0438821	mmu-miR-29b-2-5p	32.6134	115.312	-1.5205	0.0011706	0.026507	NM_001313983.1	21833	Thra	transcript	5.65207	2.85442	0.98558	0.00134355	0.0347693
TCONS_00023682	12558	Cdh2	lncRNA	5.50214	3.05558	0.848547	0.00218381	0.0438821	mmu-miR-29b-2-5p	32.6134	115.312	-1.5205	0.0011706	0.026507	NM_007624.4	12417	Cbx3	transcript	11.8227	12.4877	-0.0789428	0.000712892	0.0276354
TCONS_00023682	12558	Cdh2	lncRNA	5.50214	3.05558	0.848547	0.00218381	0.0438821	mmu-miR-29b-2-5p	32.6134	115.312	-1.5205	0.0011706	0.026507	NM_172635.3	225929	Patl1	transcript	2.3584	0.30042	2.97276	0.00236898	0.0462393
TCONS_00023682	12558	Cdh2	lncRNA	5.50214	3.05558	0.848547	0.00218381	0.0438821	mmu-miR-29b-2-5p	32.6134	115.312	-1.5205	0.0011706	0.026507	NM_144807.3	212862	Chpt1	transcript	60.0128	62.0084	-0.0471931	0.00168964	0.0382088
TCONS_00023682	12558	Cdh2	lncRNA	5.50214	3.05558	0.848547	0.00218381	0.0438821	mmu-miR-29b-2-5p	32.6134	115.312	-1.5205	0.0011706	0.026507	NM_010865.3	17926	Myoc	transcript	4.62467	1.26554	1.8696	0.000550435	0.0276354
TCONS_00023682	12558	Cdh2	lncRNA	5.50214	3.05558	0.848547	0.00218381	0.0438821	mmu-miR-29b-2-5p	32.6134	115.312	-1.5205	0.0011706	0.026507	NM_001081979.2	17257	Mecp2	transcript	3.25013	3.79955	-0.22533	0.000372863	0.0276354
TCONS_00023682	12558	Cdh2	lncRNA	5.50214	3.05558	0.848547	0.00218381	0.0438821	mmu-miR-29b-2-5p	32.6134	115.312	-1.5205	0.0011706	0.026507	NM_001039512.1	117198	Ivns1abp	transcript	5.9554	0	Inf	0.000820671	0.0276354
TCONS_00023682	12558	Cdh2	lncRNA	5.50214	3.05558	0.848547	0.00218381	0.0438821	mmu-miR-29b-2-5p	32.6134	115.312	-1.5205	0.0011706	0.026507	TCONS_00014905	216161	Sbno2	transcript	4.64735	3.20414	0.536473	0.00139977	0.0352728
TCONS_00023682	12558	Cdh2	lncRNA	5.50214	3.05558	0.848547	0.00218381	0.0438821	mmu-miR-29b-2-5p	32.6134	115.312	-1.5205	0.0011706	0.026507	NM_001012477.2	20315	Cxcl12	transcript	8.72303	23.6765	-1.44055	0.000741939	0.0276354
TCONS_00023682	12558	Cdh2	lncRNA	5.50214	3.05558	0.848547	0.00218381	0.0438821	mmu-miR-29b-2-5p	32.6134	115.312	-1.5205	0.0011706	0.026507	XM_006518707.3	19056	Ppp3cb	transcript	0.007019	4.54103	-9.33754	0.00110514	0.0316263
TCONS_00023682	12558	Cdh2	lncRNA	5.50214	3.05558	0.848547	0.00218381	0.0438821	mmu-miR-29b-2-5p	32.6134	115.312	-1.5205	0.0011706	0.026507	XM_030245515.2	12808	Cobl	transcript	1.22489	0.014136	6.43713	0.000731975	0.0276354
TCONS_00022949	118568312	LOC118568312	lncRNA	27.2217	0	Inf	0.000820671	0.0276354	mmu-miR-29b-2-5p	32.6134	115.312	-1.5205	0.0011706	0.026507	XM_036162424.1	57438	Marchf7	transcript	2.44408	0	Inf	0.000909325	0.0291578
TCONS_00022949	118568312	LOC118568312	lncRNA	27.2217	0	Inf	0.000820671	0.0276354	mmu-miR-29b-2-5p	32.6134	115.312	-1.5205	0.0011706	0.026507	NM_173866.4	108682	Gpt2	transcript	1.46859	5.47079	-1.89731	0.000818569	0.0276354
TCONS_00022949	118568312	LOC118568312	lncRNA	27.2217	0	Inf	0.000820671	0.0276354	mmu-miR-29b-2-5p	32.6134	115.312	-1.5205	0.0011706	0.026507	NM_001163379.1	55979	Agpat1	transcript	14.6579	11.2463	0.382229	0.000825619	0.0277196
TCONS_00022949	118568312	LOC118568312	lncRNA	27.2217	0	Inf	0.000820671	0.0276354	mmu-miR-29b-2-5p	32.6134	115.312	-1.5205	0.0011706	0.026507	TCONS_00025423	66158	Rtl8a	transcript	1.29636	0	Inf	0.000820671	0.0276354
TCONS_00022949	118568312	LOC118568312	lncRNA	27.2217	0	Inf	0.000820671	0.0276354	mmu-miR-29b-2-5p	32.6134	115.312	-1.5205	0.0011706	0.026507	XM_006524674.5	56468	Socs5	transcript	2.99592	0.0603897	5.63255	0.000527102	0.0276354
TCONS_00022949	118568312	LOC118568312	lncRNA	27.2217	0	Inf	0.000820671	0.0276354	mmu-miR-29b-2-5p	32.6134	115.312	-1.5205	0.0011706	0.026507	NM_177411.4	19344	Rab5b	transcript	15.3906	17.862	-0.214852	0.000321654	0.0276354
TCONS_00022949	118568312	LOC118568312	lncRNA	27.2217	0	Inf	0.000820671	0.0276354	mmu-miR-29b-2-5p	32.6134	115.312	-1.5205	0.0011706	0.026507	TCONS_00017675	68519	Eml1	transcript	11.0496	10.9045	0.0190772	0.00239943	0.0465183
TCONS_00022949	118568312	LOC118568312	lncRNA	27.2217	0	Inf	0.000820671	0.0276354	mmu-miR-29b-2-5p	32.6134	115.312	-1.5205	0.0011706	0.026507	NM_027859.3	71673	Rnf215	transcript	2.26533	2.64791	-0.22513	0.00109052	0.0314747
TCONS_00022949	118568312	LOC118568312	lncRNA	27.2217	0	Inf	0.000820671	0.0276354	mmu-miR-29b-2-5p	32.6134	115.312	-1.5205	0.0011706	0.026507	NM_016709.2	11992	Auh	transcript	23.1108	25.9264	-0.165855	0.00124159	0.0335637
TCONS_00022949	118568312	LOC118568312	lncRNA	27.2217	0	Inf	0.000820671	0.0276354	mmu-miR-29b-2-5p	32.6134	115.312	-1.5205	0.0011706	0.026507	XM_030255147.2	381290	Atp2b4	transcript	1.79149	0	Inf	0.000233871	0.0276354
TCONS_00022949	118568312	LOC118568312	lncRNA	27.2217	0	Inf	0.000820671	0.0276354	mmu-miR-29b-2-5p	32.6134	115.312	-1.5205	0.0011706	0.026507	NM_001359505.1	77521	Mtus2	transcript	30.9488	21.1013	0.552555	0.000558842	0.0276354
TCONS_00022949	118568312	LOC118568312	lncRNA	27.2217	0	Inf	0.000820671	0.0276354	mmu-miR-29b-2-5p	32.6134	115.312	-1.5205	0.0011706	0.026507	NM_001253814.1	71782	Ankle2	transcript	7.72172	4.99246	0.629172	0.00187625	0.0405382
TCONS_00022949	118568312	LOC118568312	lncRNA	27.2217	0	Inf	0.000820671	0.0276354	mmu-miR-29b-2-5p	32.6134	115.312	-1.5205	0.0011706	0.026507	TCONS_00024982	22284	Usp9x	transcript	4.42644	0.000426333	13.3419	0.000818366	0.0276354
TCONS_00022949	118568312	LOC118568312	lncRNA	27.2217	0	Inf	0.000820671	0.0276354	mmu-miR-29b-2-5p	32.6134	115.312	-1.5205	0.0011706	0.026507	NM_145562.2	231440	Parm1	transcript	37.5905	24.2018	0.635253	0.00139782	0.0352728
TCONS_00022949	118568312	LOC118568312	lncRNA	27.2217	0	Inf	0.000820671	0.0276354	mmu-miR-29b-2-5p	32.6134	115.312	-1.5205	0.0011706	0.026507	NM_009818.1	12385	Ctnna1	transcript	89.2245	90.2244	-0.0160775	0.000857497	0.0281337
TCONS_00022949	118568312	LOC118568312	lncRNA	27.2217	0	Inf	0.000820671	0.0276354	mmu-miR-29b-2-5p	32.6134	115.312	-1.5205	0.0011706	0.026507	NM_019774.5	56399	Akap8	transcript	4.41498	4.61893	-0.0651514	0.0020109	0.0420282
TCONS_00022949	118568312	LOC118568312	lncRNA	27.2217	0	Inf	0.000820671	0.0276354	mmu-miR-29b-2-5p	32.6134	115.312	-1.5205	0.0011706	0.026507	NM_001017429.2	12856	Cox17	transcript	100.01	129.573	-0.373622	0.00264968	0.0491363
TCONS_00022949	118568312	LOC118568312	lncRNA	27.2217	0	Inf	0.000820671	0.0276354	mmu-miR-29b-2-5p	32.6134	115.312	-1.5205	0.0011706	0.026507	NM_025824.4	66882	Bzw1	transcript	17.9692	13.9017	0.370267	0.00246002	0.0472596
TCONS_00022949	118568312	LOC118568312	lncRNA	27.2217	0	Inf	0.000820671	0.0276354	mmu-miR-29b-2-5p	32.6134	115.312	-1.5205	0.0011706	0.026507	TCONS_00018780	56705	Ranbp9	transcript	4.50464	0	Inf	0.000820671	0.0276354
TCONS_00022949	118568312	LOC118568312	lncRNA	27.2217	0	Inf	0.000820671	0.0276354	mmu-miR-29b-2-5p	32.6134	115.312	-1.5205	0.0011706	0.026507	TCONS_00020016	65246	Xpo7	transcript	4.13029	0.00722533	9.15896	0.00116536	0.0326432
TCONS_00022949	118568312	LOC118568312	lncRNA	27.2217	0	Inf	0.000820671	0.0276354	mmu-miR-29b-2-5p	32.6134	115.312	-1.5205	0.0011706	0.026507	NM_001083919.1	241431	Xirp2	transcript	71.3789	94.7049	-0.407941	0.000357728	0.0276354
TCONS_00022949	118568312	LOC118568312	lncRNA	27.2217	0	Inf	0.000820671	0.0276354	mmu-miR-29b-2-5p	32.6134	115.312	-1.5205	0.0011706	0.026507	NM_001098225.2	11496	Adam22	transcript	2.58778	0.00525567	8.94362	2.29e-06	0.0151166
TCONS_00022949	118568312	LOC118568312	lncRNA	27.2217	0	Inf	0.000820671	0.0276354	mmu-miR-29b-2-5p	32.6134	115.312	-1.5205	0.0011706	0.026507	XM_006518778.1	211922	Dennd6a	transcript	0.97065	0.0248183	5.28947	0.00216379	0.0438208
TCONS_00022949	118568312	LOC118568312	lncRNA	27.2217	0	Inf	0.000820671	0.0276354	mmu-miR-29b-2-5p	32.6134	115.312	-1.5205	0.0011706	0.026507	NM_133831.3	68077	Nop53	transcript	25.343	23.991	0.0790944	0.000321251	0.0276354
TCONS_00022949	118568312	LOC118568312	lncRNA	27.2217	0	Inf	0.000820671	0.0276354	mmu-miR-29b-2-5p	32.6134	115.312	-1.5205	0.0011706	0.026507	TCONS_00022043	20656	Sod2	transcript	6.07359	0.19545	4.95768	0.0002461	0.0276354
TCONS_00022949	118568312	LOC118568312	lncRNA	27.2217	0	Inf	0.000820671	0.0276354	mmu-miR-29b-2-5p	32.6134	115.312	-1.5205	0.0011706	0.026507	TCONS_00004132	229663	Csde1	transcript	48.2189	63.0905	-0.387826	0.0012973	0.0342571
TCONS_00022949	118568312	LOC118568312	lncRNA	27.2217	0	Inf	0.000820671	0.0276354	mmu-miR-29b-2-5p	32.6134	115.312	-1.5205	0.0011706	0.026507	TCONS_00021414	56637	Gsk3b	transcript	3.22604	0	Inf	0.000820671	0.0276354
TCONS_00022949	118568312	LOC118568312	lncRNA	27.2217	0	Inf	0.000820671	0.0276354	mmu-miR-29b-2-5p	32.6134	115.312	-1.5205	0.0011706	0.026507	XM_017316846.2	106393	Srl	transcript	1.95815	3.58796	-0.873667	3.65e-05	0.0155632
TCONS_00022949	118568312	LOC118568312	lncRNA	27.2217	0	Inf	0.000820671	0.0276354	mmu-miR-29b-2-5p	32.6134	115.312	-1.5205	0.0011706	0.026507	XM_030249575.2	18607	Pdpk1	transcript	3.59523	0	Inf	2.05e-05	0.0155632
TCONS_00022949	118568312	LOC118568312	lncRNA	27.2217	0	Inf	0.000820671	0.0276354	mmu-miR-29b-2-5p	32.6134	115.312	-1.5205	0.0011706	0.026507	TCONS_00002822	67512	Agpat2	transcript	1.95082	0	Inf	0.000820671	0.0276354
TCONS_00022949	118568312	LOC118568312	lncRNA	27.2217	0	Inf	0.000820671	0.0276354	mmu-miR-29b-2-5p	32.6134	115.312	-1.5205	0.0011706	0.026507	NM_001081242.2	70549	Tln2	transcript	2.63951	0.0295667	6.48015	0.000371777	0.0276354
TCONS_00022949	118568312	LOC118568312	lncRNA	27.2217	0	Inf	0.000820671	0.0276354	mmu-miR-29b-2-5p	32.6134	115.312	-1.5205	0.0011706	0.026507	TCONS_00012867	214897	Csnk1g1	transcript	0.820922	0.006047	7.08488	0.000423387	0.0276354
TCONS_00022949	118568312	LOC118568312	lncRNA	27.2217	0	Inf	0.000820671	0.0276354	mmu-miR-29b-2-5p	32.6134	115.312	-1.5205	0.0011706	0.026507	NM_001362722.1	74103	Nebl	transcript	26.0163	0	Inf	2.74e-05	0.0155632
TCONS_00022949	118568312	LOC118568312	lncRNA	27.2217	0	Inf	0.000820671	0.0276354	mmu-miR-29b-2-5p	32.6134	115.312	-1.5205	0.0011706	0.026507	NM_199468.2	213436	Rtl3	transcript	2.36875	0.177523	3.73804	0.000371092	0.0276354
TCONS_00022949	118568312	LOC118568312	lncRNA	27.2217	0	Inf	0.000820671	0.0276354	mmu-miR-29b-2-5p	32.6134	115.312	-1.5205	0.0011706	0.026507	NM_001362456.1	16509	Kcne1	transcript	4.13095	0.493128	3.06644	0.000339807	0.0276354
TCONS_00022949	118568312	LOC118568312	lncRNA	27.2217	0	Inf	0.000820671	0.0276354	mmu-miR-29b-2-5p	32.6134	115.312	-1.5205	0.0011706	0.026507	XM_017321605.3	27418	Mkln1	transcript	1.57045	0.0165473	6.56843	0.00103662	0.0304533
TCONS_00022949	118568312	LOC118568312	lncRNA	27.2217	0	Inf	0.000820671	0.0276354	mmu-miR-29b-2-5p	32.6134	115.312	-1.5205	0.0011706	0.026507	NM_130449.2	140792	Colec12	transcript	3.99678	3.31964	0.26781	0.00250276	0.0477182
TCONS_00022949	118568312	LOC118568312	lncRNA	27.2217	0	Inf	0.000820671	0.0276354	mmu-miR-29b-2-5p	32.6134	115.312	-1.5205	0.0011706	0.026507	TCONS_00015789	107476	Acaca	transcript	0.855672	0.031853	4.74756	0.0012857	0.0341943
TCONS_00022949	118568312	LOC118568312	lncRNA	27.2217	0	Inf	0.000820671	0.0276354	mmu-miR-29b-2-5p	32.6134	115.312	-1.5205	0.0011706	0.026507	TCONS_00002486	68295	Aar2	transcript	1.18122	0	Inf	0.000820671	0.0276354
TCONS_00022949	118568312	LOC118568312	lncRNA	27.2217	0	Inf	0.000820671	0.0276354	mmu-miR-29b-2-5p	32.6134	115.312	-1.5205	0.0011706	0.026507	XM_006517452.5	76577	Faf2	transcript	0.845375	0	Inf	0.000820671	0.0276354
TCONS_00022949	118568312	LOC118568312	lncRNA	27.2217	0	Inf	0.000820671	0.0276354	mmu-miR-29b-2-5p	32.6134	115.312	-1.5205	0.0011706	0.026507	NM_177322.3	11607	Agtr1a	transcript	16.509	9.02107	0.871884	1.52e-05	0.0155632
TCONS_00022949	118568312	LOC118568312	lncRNA	27.2217	0	Inf	0.000820671	0.0276354	mmu-miR-29b-2-5p	32.6134	115.312	-1.5205	0.0011706	0.026507	NM_001355651.1	74182	Gpcpd1	transcript	1.98661	0.186929	3.40975	0.00197354	0.041549
TCONS_00022949	118568312	LOC118568312	lncRNA	27.2217	0	Inf	0.000820671	0.0276354	mmu-miR-29b-2-5p	32.6134	115.312	-1.5205	0.0011706	0.026507	TCONS_00022742	30957	Mapk8ip3	transcript	0.033413	2.79614	-6.38688	0.000274522	0.0276354
TCONS_00022949	118568312	LOC118568312	lncRNA	27.2217	0	Inf	0.000820671	0.0276354	mmu-miR-29b-2-5p	32.6134	115.312	-1.5205	0.0011706	0.026507	NM_001110844.1	12293	Cacna2d1	transcript	0.631283	4.45131	-2.81787	0.000493731	0.0276354
TCONS_00022949	118568312	LOC118568312	lncRNA	27.2217	0	Inf	0.000820671	0.0276354	mmu-miR-29b-2-5p	32.6134	115.312	-1.5205	0.0011706	0.026507	NM_053159.4	94062	Mrpl3	transcript	20.8991	24.078	-0.204272	1.09e-05	0.0155632
TCONS_00022949	118568312	LOC118568312	lncRNA	27.2217	0	Inf	0.000820671	0.0276354	mmu-miR-29b-2-5p	32.6134	115.312	-1.5205	0.0011706	0.026507	NM_197990.3	69399	1700025G04Rik	transcript	6.52172	2.62541	1.31271	0.000479421	0.0276354
TCONS_00022949	118568312	LOC118568312	lncRNA	27.2217	0	Inf	0.000820671	0.0276354	mmu-miR-29b-2-5p	32.6134	115.312	-1.5205	0.0011706	0.026507	TCONS_00000054	13518	Dst	transcript	5.41743	0.414156	3.70936	0.00225289	0.0446545
TCONS_00022949	118568312	LOC118568312	lncRNA	27.2217	0	Inf	0.000820671	0.0276354	mmu-miR-29b-2-5p	32.6134	115.312	-1.5205	0.0011706	0.026507	NM_009195.3	20498	Slc12a4	transcript	6.17795	9.86484	-0.675168	0.00251823	0.0478546
TCONS_00022949	118568312	LOC118568312	lncRNA	27.2217	0	Inf	0.000820671	0.0276354	mmu-miR-29b-2-5p	32.6134	115.312	-1.5205	0.0011706	0.026507	NM_001289702.1	83679	Pde4dip	transcript	26.0448	32.6548	-0.326299	0.00157065	0.0372453
TCONS_00022949	118568312	LOC118568312	lncRNA	27.2217	0	Inf	0.000820671	0.0276354	mmu-miR-29b-2-5p	32.6134	115.312	-1.5205	0.0011706	0.026507	NM_013651.4	20222	Sf3a2	transcript	0.17961	7.15197	-5.3154	0.00174107	0.0385677
TCONS_00022949	118568312	LOC118568312	lncRNA	27.2217	0	Inf	0.000820671	0.0276354	mmu-miR-29b-2-5p	32.6134	115.312	-1.5205	0.0011706	0.026507	TCONS_00020910	223697	Sun2	transcript	2.54478	0	Inf	0.000820671	0.0276354
TCONS_00022949	118568312	LOC118568312	lncRNA	27.2217	0	Inf	0.000820671	0.0276354	mmu-miR-29b-2-5p	32.6134	115.312	-1.5205	0.0011706	0.026507	XM_036165784.1	12321	Calu	transcript	10.5439	16.3948	-0.636826	0.00157708	0.0372453
TCONS_00022949	118568312	LOC118568312	lncRNA	27.2217	0	Inf	0.000820671	0.0276354	mmu-miR-29b-2-5p	32.6134	115.312	-1.5205	0.0011706	0.026507	NM_019694.2	56384	Letm1	transcript	5.73717	11.2145	-0.966953	0.000238425	0.0276354
TCONS_00022949	118568312	LOC118568312	lncRNA	27.2217	0	Inf	0.000820671	0.0276354	mmu-miR-29b-2-5p	32.6134	115.312	-1.5205	0.0011706	0.026507	TCONS_00023547	72124	Seh1l	transcript	2.33466	0.0211037	6.78958	0.000969142	0.0297987
TCONS_00022949	118568312	LOC118568312	lncRNA	27.2217	0	Inf	0.000820671	0.0276354	mmu-miR-29b-2-5p	32.6134	115.312	-1.5205	0.0011706	0.026507	NM_009647.5	11639	Ak4	transcript	3.29582	0.0275303	6.90347	0.00015385	0.0276354
TCONS_00022949	118568312	LOC118568312	lncRNA	27.2217	0	Inf	0.000820671	0.0276354	mmu-miR-29b-2-5p	32.6134	115.312	-1.5205	0.0011706	0.026507	NM_010516.2	16007	Ccn1	transcript	11.8013	25.7037	-1.12303	0.00153723	0.0369578
TCONS_00022949	118568312	LOC118568312	lncRNA	27.2217	0	Inf	0.000820671	0.0276354	mmu-miR-29b-2-5p	32.6134	115.312	-1.5205	0.0011706	0.026507	NM_027558.1	70804	Pgrmc2	transcript	13.5548	8.47909	0.676825	0.000359363	0.0276354
TCONS_00022949	118568312	LOC118568312	lncRNA	27.2217	0	Inf	0.000820671	0.0276354	mmu-miR-29b-2-5p	32.6134	115.312	-1.5205	0.0011706	0.026507	NM_008681.2	17988	Ndrg1	transcript	13.4879	7.27813	0.890022	0.00249471	0.0476436
TCONS_00022949	118568312	LOC118568312	lncRNA	27.2217	0	Inf	0.000820671	0.0276354	mmu-miR-29b-2-5p	32.6134	115.312	-1.5205	0.0011706	0.026507	NM_008608.4	17387	Mmp14	transcript	4.99864	1.90388	1.39259	0.00209356	0.0430152
TCONS_00022949	118568312	LOC118568312	lncRNA	27.2217	0	Inf	0.000820671	0.0276354	mmu-miR-29b-2-5p	32.6134	115.312	-1.5205	0.0011706	0.026507	NM_026275.4	67615	Ube2r2	transcript	5.99431	0.341337	4.13433	0.000853945	0.0281337
TCONS_00022949	118568312	LOC118568312	lncRNA	27.2217	0	Inf	0.000820671	0.0276354	mmu-miR-29b-2-5p	32.6134	115.312	-1.5205	0.0011706	0.026507	NM_025987.3	67130	Ndufa6	transcript	145.358	177.624	-0.28922	0.000487275	0.0276354
TCONS_00022949	118568312	LOC118568312	lncRNA	27.2217	0	Inf	0.000820671	0.0276354	mmu-miR-29b-2-5p	32.6134	115.312	-1.5205	0.0011706	0.026507	NM_175523.5	243382	Ppm1k	transcript	41.3824	25.3879	0.704875	0.000348613	0.0276354
TCONS_00022949	118568312	LOC118568312	lncRNA	27.2217	0	Inf	0.000820671	0.0276354	mmu-miR-29b-2-5p	32.6134	115.312	-1.5205	0.0011706	0.026507	XM_006534523.2	79566	Sh3bp5l	transcript	1.99289	0.00804	7.95345	0.000614637	0.0276354
TCONS_00022949	118568312	LOC118568312	lncRNA	27.2217	0	Inf	0.000820671	0.0276354	mmu-miR-29b-2-5p	32.6134	115.312	-1.5205	0.0011706	0.026507	TCONS_00023376	19290	Pura	transcript	2.15409	0.008678	7.9555	0.00096005	0.0297987
TCONS_00022949	118568312	LOC118568312	lncRNA	27.2217	0	Inf	0.000820671	0.0276354	mmu-miR-29b-2-5p	32.6134	115.312	-1.5205	0.0011706	0.026507	NM_033322.3	93730	Lztfl1	transcript	1.35882	2.78852	-1.03715	0.00093363	0.0292165
TCONS_00022949	118568312	LOC118568312	lncRNA	27.2217	0	Inf	0.000820671	0.0276354	mmu-miR-29b-2-5p	32.6134	115.312	-1.5205	0.0011706	0.026507	NM_029182.1	75141	Rasd2	transcript	5.28095	1.10421	2.25778	0.00103307	0.0304533
TCONS_00022949	118568312	LOC118568312	lncRNA	27.2217	0	Inf	0.000820671	0.0276354	mmu-miR-29b-2-5p	32.6134	115.312	-1.5205	0.0011706	0.026507	NM_001169577.1	22214	Ube2h	transcript	1.41218	0.0643033	4.45689	0.00189306	0.0407486
TCONS_00022949	118568312	LOC118568312	lncRNA	27.2217	0	Inf	0.000820671	0.0276354	mmu-miR-29b-2-5p	32.6134	115.312	-1.5205	0.0011706	0.026507	NM_011785.4	23797	Akt3	transcript	1.5986	0.0690953	4.53208	0.0015947	0.037419
TCONS_00022949	118568312	LOC118568312	lncRNA	27.2217	0	Inf	0.000820671	0.0276354	mmu-miR-29b-2-5p	32.6134	115.312	-1.5205	0.0011706	0.026507	NM_016686.4	22344	Vezf1	transcript	10.1809	9.06881	0.166877	0.0015653	0.0372453
TCONS_00022949	118568312	LOC118568312	lncRNA	27.2217	0	Inf	0.000820671	0.0276354	mmu-miR-29b-2-5p	32.6134	115.312	-1.5205	0.0011706	0.026507	XM_036165926.1	18575	Pde1c	transcript	2.25441	0.005907	8.57611	0.000698786	0.0276354
TCONS_00022949	118568312	LOC118568312	lncRNA	27.2217	0	Inf	0.000820671	0.0276354	mmu-miR-29b-2-5p	32.6134	115.312	-1.5205	0.0011706	0.026507	XM_011246321.3	19043	Ppm1b	transcript	0.886711	0	Inf	0.000820671	0.0276354
TCONS_00022949	118568312	LOC118568312	lncRNA	27.2217	0	Inf	0.000820671	0.0276354	mmu-miR-29b-2-5p	32.6134	115.312	-1.5205	0.0011706	0.026507	NM_008773.4	18442	P2ry2	transcript	5.26081	6.19008	-0.234674	0.00171046	0.0383222
TCONS_00022949	118568312	LOC118568312	lncRNA	27.2217	0	Inf	0.000820671	0.0276354	mmu-miR-29b-2-5p	32.6134	115.312	-1.5205	0.0011706	0.026507	XM_006521705.3	107589	Mylk	transcript	3.13462	3.83408	-0.290594	0.00265995	0.0492416
TCONS_00022949	118568312	LOC118568312	lncRNA	27.2217	0	Inf	0.000820671	0.0276354	mmu-miR-29b-2-5p	32.6134	115.312	-1.5205	0.0011706	0.026507	TCONS_00008259	243764	Chrm2	transcript	7.92449	7.05464	0.167746	0.000185113	0.0276354
TCONS_00022949	118568312	LOC118568312	lncRNA	27.2217	0	Inf	0.000820671	0.0276354	mmu-miR-29b-2-5p	32.6134	115.312	-1.5205	0.0011706	0.026507	NM_001313983.1	21833	Thra	transcript	5.65207	2.85442	0.98558	0.00134355	0.0347693
TCONS_00022949	118568312	LOC118568312	lncRNA	27.2217	0	Inf	0.000820671	0.0276354	mmu-miR-29b-2-5p	32.6134	115.312	-1.5205	0.0011706	0.026507	NM_007624.4	12417	Cbx3	transcript	11.8227	12.4877	-0.0789428	0.000712892	0.0276354
TCONS_00022949	118568312	LOC118568312	lncRNA	27.2217	0	Inf	0.000820671	0.0276354	mmu-miR-29b-2-5p	32.6134	115.312	-1.5205	0.0011706	0.026507	NM_172635.3	225929	Patl1	transcript	2.3584	0.30042	2.97276	0.00236898	0.0462393
TCONS_00022949	118568312	LOC118568312	lncRNA	27.2217	0	Inf	0.000820671	0.0276354	mmu-miR-29b-2-5p	32.6134	115.312	-1.5205	0.0011706	0.026507	NM_144807.3	212862	Chpt1	transcript	60.0128	62.0084	-0.0471931	0.00168964	0.0382088
TCONS_00022949	118568312	LOC118568312	lncRNA	27.2217	0	Inf	0.000820671	0.0276354	mmu-miR-29b-2-5p	32.6134	115.312	-1.5205	0.0011706	0.026507	NM_010865.3	17926	Myoc	transcript	4.62467	1.26554	1.8696	0.000550435	0.0276354
TCONS_00022949	118568312	LOC118568312	lncRNA	27.2217	0	Inf	0.000820671	0.0276354	mmu-miR-29b-2-5p	32.6134	115.312	-1.5205	0.0011706	0.026507	NM_001081979.2	17257	Mecp2	transcript	3.25013	3.79955	-0.22533	0.000372863	0.0276354
TCONS_00022949	118568312	LOC118568312	lncRNA	27.2217	0	Inf	0.000820671	0.0276354	mmu-miR-29b-2-5p	32.6134	115.312	-1.5205	0.0011706	0.026507	NM_001039512.1	117198	Ivns1abp	transcript	5.9554	0	Inf	0.000820671	0.0276354
TCONS_00022949	118568312	LOC118568312	lncRNA	27.2217	0	Inf	0.000820671	0.0276354	mmu-miR-29b-2-5p	32.6134	115.312	-1.5205	0.0011706	0.026507	TCONS_00014905	216161	Sbno2	transcript	4.64735	3.20414	0.536473	0.00139977	0.0352728
TCONS_00022949	118568312	LOC118568312	lncRNA	27.2217	0	Inf	0.000820671	0.0276354	mmu-miR-29b-2-5p	32.6134	115.312	-1.5205	0.0011706	0.026507	NM_001012477.2	20315	Cxcl12	transcript	8.72303	23.6765	-1.44055	0.000741939	0.0276354
TCONS_00022949	118568312	LOC118568312	lncRNA	27.2217	0	Inf	0.000820671	0.0276354	mmu-miR-29b-2-5p	32.6134	115.312	-1.5205	0.0011706	0.026507	XM_006518707.3	19056	Ppp3cb	transcript	0.007019	4.54103	-9.33754	0.00110514	0.0316263
TCONS_00022949	118568312	LOC118568312	lncRNA	27.2217	0	Inf	0.000820671	0.0276354	mmu-miR-29b-2-5p	32.6134	115.312	-1.5205	0.0011706	0.026507	XM_030245515.2	12808	Cobl	transcript	1.22489	0.014136	6.43713	0.000731975	0.0276354
TCONS_00022369	118568312	LOC118568312	lncRNA	375.367	0	Inf	0.000820671	0.0276354	mmu-miR-5126	30.4974	5.65546	2.0107	5.18e-05	0.00284	NM_019694.2	56384	Letm1	transcript	5.73717	11.2145	-0.966953	0.000238425	0.0276354
TCONS_00022369	118568312	LOC118568312	lncRNA	375.367	0	Inf	0.000820671	0.0276354	mmu-miR-5126	30.4974	5.65546	2.0107	5.18e-05	0.00284	NM_027044.3	56612	Pfdn5	transcript	62.793	47.0569	0.416198	0.00093278	0.0292165
TCONS_00022369	118568312	LOC118568312	lncRNA	375.367	0	Inf	0.000820671	0.0276354	mmu-miR-5126	30.4974	5.65546	2.0107	5.18e-05	0.00284	XM_030255147.2	381290	Atp2b4	transcript	1.79149	0	Inf	0.000233871	0.0276354
TCONS_00022369	118568312	LOC118568312	lncRNA	375.367	0	Inf	0.000820671	0.0276354	mmu-miR-5126	30.4974	5.65546	2.0107	5.18e-05	0.00284	XM_036165784.1	12321	Calu	transcript	10.5439	16.3948	-0.636826	0.00157708	0.0372453
TCONS_00022369	118568312	LOC118568312	lncRNA	375.367	0	Inf	0.000820671	0.0276354	mmu-miR-5126	30.4974	5.65546	2.0107	5.18e-05	0.00284	NM_008226.2	15166	Hcn2	transcript	0.545519	4.3639	-2.99992	0.000415767	0.0276354
TCONS_00022369	118568312	LOC118568312	lncRNA	375.367	0	Inf	0.000820671	0.0276354	mmu-miR-5126	30.4974	5.65546	2.0107	5.18e-05	0.00284	NM_026524.4	68041	Mid1ip1	transcript	37.9267	30.3802	0.320079	0.000987289	0.0299274
TCONS_00022369	118568312	LOC118568312	lncRNA	375.367	0	Inf	0.000820671	0.0276354	mmu-miR-5126	30.4974	5.65546	2.0107	5.18e-05	0.00284	XM_006504490.4	66711	Sbds	transcript	5.04204	0.162342	4.9569	0.000582299	0.0276354
TCONS_00022369	118568312	LOC118568312	lncRNA	375.367	0	Inf	0.000820671	0.0276354	mmu-miR-5126	30.4974	5.65546	2.0107	5.18e-05	0.00284	NM_008688.3	18029	Nfic	transcript	4.59623	14.0914	-1.61629	0.00200236	0.0419257
TCONS_00022369	118568312	LOC118568312	lncRNA	375.367	0	Inf	0.000820671	0.0276354	mmu-miR-5126	30.4974	5.65546	2.0107	5.18e-05	0.00284	TCONS_00022043	20656	Sod2	transcript	6.07359	0.19545	4.95768	0.0002461	0.0276354
TCONS_00022369	118568312	LOC118568312	lncRNA	375.367	0	Inf	0.000820671	0.0276354	mmu-miR-5126	30.4974	5.65546	2.0107	5.18e-05	0.00284	TCONS_00022742	30957	Mapk8ip3	transcript	0.033413	2.79614	-6.38688	0.000274522	0.0276354
TCONS_00004800	118449	Synpo2	lncRNA	1.0568	0	Inf	0.000820671	0.0276354	mmu-miR-5126	30.4974	5.65546	2.0107	5.18e-05	0.00284	NM_019694.2	56384	Letm1	transcript	5.73717	11.2145	-0.966953	0.000238425	0.0276354
TCONS_00004800	118449	Synpo2	lncRNA	1.0568	0	Inf	0.000820671	0.0276354	mmu-miR-5126	30.4974	5.65546	2.0107	5.18e-05	0.00284	NM_027044.3	56612	Pfdn5	transcript	62.793	47.0569	0.416198	0.00093278	0.0292165
TCONS_00004800	118449	Synpo2	lncRNA	1.0568	0	Inf	0.000820671	0.0276354	mmu-miR-5126	30.4974	5.65546	2.0107	5.18e-05	0.00284	XM_030255147.2	381290	Atp2b4	transcript	1.79149	0	Inf	0.000233871	0.0276354
TCONS_00004800	118449	Synpo2	lncRNA	1.0568	0	Inf	0.000820671	0.0276354	mmu-miR-5126	30.4974	5.65546	2.0107	5.18e-05	0.00284	XM_036165784.1	12321	Calu	transcript	10.5439	16.3948	-0.636826	0.00157708	0.0372453
TCONS_00004800	118449	Synpo2	lncRNA	1.0568	0	Inf	0.000820671	0.0276354	mmu-miR-5126	30.4974	5.65546	2.0107	5.18e-05	0.00284	NM_008226.2	15166	Hcn2	transcript	0.545519	4.3639	-2.99992	0.000415767	0.0276354
TCONS_00004800	118449	Synpo2	lncRNA	1.0568	0	Inf	0.000820671	0.0276354	mmu-miR-5126	30.4974	5.65546	2.0107	5.18e-05	0.00284	NM_026524.4	68041	Mid1ip1	transcript	37.9267	30.3802	0.320079	0.000987289	0.0299274
TCONS_00004800	118449	Synpo2	lncRNA	1.0568	0	Inf	0.000820671	0.0276354	mmu-miR-5126	30.4974	5.65546	2.0107	5.18e-05	0.00284	XM_006504490.4	66711	Sbds	transcript	5.04204	0.162342	4.9569	0.000582299	0.0276354
TCONS_00004800	118449	Synpo2	lncRNA	1.0568	0	Inf	0.000820671	0.0276354	mmu-miR-5126	30.4974	5.65546	2.0107	5.18e-05	0.00284	NM_008688.3	18029	Nfic	transcript	4.59623	14.0914	-1.61629	0.00200236	0.0419257
TCONS_00004800	118449	Synpo2	lncRNA	1.0568	0	Inf	0.000820671	0.0276354	mmu-miR-5126	30.4974	5.65546	2.0107	5.18e-05	0.00284	TCONS_00022043	20656	Sod2	transcript	6.07359	0.19545	4.95768	0.0002461	0.0276354
TCONS_00004800	118449	Synpo2	lncRNA	1.0568	0	Inf	0.000820671	0.0276354	mmu-miR-5126	30.4974	5.65546	2.0107	5.18e-05	0.00284	TCONS_00022742	30957	Mapk8ip3	transcript	0.033413	2.79614	-6.38688	0.000274522	0.0276354
TCONS_00022951	118568312	LOC118568312	lncRNA	20.3941	0	Inf	0.000820671	0.0276354	mmu-miR-5126	30.4974	5.65546	2.0107	5.18e-05	0.00284	NM_019694.2	56384	Letm1	transcript	5.73717	11.2145	-0.966953	0.000238425	0.0276354
TCONS_00022951	118568312	LOC118568312	lncRNA	20.3941	0	Inf	0.000820671	0.0276354	mmu-miR-5126	30.4974	5.65546	2.0107	5.18e-05	0.00284	NM_027044.3	56612	Pfdn5	transcript	62.793	47.0569	0.416198	0.00093278	0.0292165
TCONS_00022951	118568312	LOC118568312	lncRNA	20.3941	0	Inf	0.000820671	0.0276354	mmu-miR-5126	30.4974	5.65546	2.0107	5.18e-05	0.00284	XM_030255147.2	381290	Atp2b4	transcript	1.79149	0	Inf	0.000233871	0.0276354
TCONS_00022951	118568312	LOC118568312	lncRNA	20.3941	0	Inf	0.000820671	0.0276354	mmu-miR-5126	30.4974	5.65546	2.0107	5.18e-05	0.00284	XM_036165784.1	12321	Calu	transcript	10.5439	16.3948	-0.636826	0.00157708	0.0372453
TCONS_00022951	118568312	LOC118568312	lncRNA	20.3941	0	Inf	0.000820671	0.0276354	mmu-miR-5126	30.4974	5.65546	2.0107	5.18e-05	0.00284	NM_008226.2	15166	Hcn2	transcript	0.545519	4.3639	-2.99992	0.000415767	0.0276354
TCONS_00022951	118568312	LOC118568312	lncRNA	20.3941	0	Inf	0.000820671	0.0276354	mmu-miR-5126	30.4974	5.65546	2.0107	5.18e-05	0.00284	NM_026524.4	68041	Mid1ip1	transcript	37.9267	30.3802	0.320079	0.000987289	0.0299274
TCONS_00022951	118568312	LOC118568312	lncRNA	20.3941	0	Inf	0.000820671	0.0276354	mmu-miR-5126	30.4974	5.65546	2.0107	5.18e-05	0.00284	XM_006504490.4	66711	Sbds	transcript	5.04204	0.162342	4.9569	0.000582299	0.0276354
TCONS_00022951	118568312	LOC118568312	lncRNA	20.3941	0	Inf	0.000820671	0.0276354	mmu-miR-5126	30.4974	5.65546	2.0107	5.18e-05	0.00284	NM_008688.3	18029	Nfic	transcript	4.59623	14.0914	-1.61629	0.00200236	0.0419257
TCONS_00022951	118568312	LOC118568312	lncRNA	20.3941	0	Inf	0.000820671	0.0276354	mmu-miR-5126	30.4974	5.65546	2.0107	5.18e-05	0.00284	TCONS_00022043	20656	Sod2	transcript	6.07359	0.19545	4.95768	0.0002461	0.0276354
TCONS_00022951	118568312	LOC118568312	lncRNA	20.3941	0	Inf	0.000820671	0.0276354	mmu-miR-5126	30.4974	5.65546	2.0107	5.18e-05	0.00284	TCONS_00022742	30957	Mapk8ip3	transcript	0.033413	2.79614	-6.38688	0.000274522	0.0276354
TCONS_00025777	XLOC_015265	-	lncRNA	26.7627	3.52762	2.92345	0.00141511	0.0355126	mmu-miR-5126	30.4974	5.65546	2.0107	5.18e-05	0.00284	NM_019694.2	56384	Letm1	transcript	5.73717	11.2145	-0.966953	0.000238425	0.0276354
TCONS_00025777	XLOC_015265	-	lncRNA	26.7627	3.52762	2.92345	0.00141511	0.0355126	mmu-miR-5126	30.4974	5.65546	2.0107	5.18e-05	0.00284	NM_027044.3	56612	Pfdn5	transcript	62.793	47.0569	0.416198	0.00093278	0.0292165
TCONS_00025777	XLOC_015265	-	lncRNA	26.7627	3.52762	2.92345	0.00141511	0.0355126	mmu-miR-5126	30.4974	5.65546	2.0107	5.18e-05	0.00284	XM_030255147.2	381290	Atp2b4	transcript	1.79149	0	Inf	0.000233871	0.0276354
TCONS_00025777	XLOC_015265	-	lncRNA	26.7627	3.52762	2.92345	0.00141511	0.0355126	mmu-miR-5126	30.4974	5.65546	2.0107	5.18e-05	0.00284	XM_036165784.1	12321	Calu	transcript	10.5439	16.3948	-0.636826	0.00157708	0.0372453
TCONS_00025777	XLOC_015265	-	lncRNA	26.7627	3.52762	2.92345	0.00141511	0.0355126	mmu-miR-5126	30.4974	5.65546	2.0107	5.18e-05	0.00284	NM_008226.2	15166	Hcn2	transcript	0.545519	4.3639	-2.99992	0.000415767	0.0276354
TCONS_00025777	XLOC_015265	-	lncRNA	26.7627	3.52762	2.92345	0.00141511	0.0355126	mmu-miR-5126	30.4974	5.65546	2.0107	5.18e-05	0.00284	NM_026524.4	68041	Mid1ip1	transcript	37.9267	30.3802	0.320079	0.000987289	0.0299274
TCONS_00025777	XLOC_015265	-	lncRNA	26.7627	3.52762	2.92345	0.00141511	0.0355126	mmu-miR-5126	30.4974	5.65546	2.0107	5.18e-05	0.00284	XM_006504490.4	66711	Sbds	transcript	5.04204	0.162342	4.9569	0.000582299	0.0276354
TCONS_00025777	XLOC_015265	-	lncRNA	26.7627	3.52762	2.92345	0.00141511	0.0355126	mmu-miR-5126	30.4974	5.65546	2.0107	5.18e-05	0.00284	NM_008688.3	18029	Nfic	transcript	4.59623	14.0914	-1.61629	0.00200236	0.0419257
TCONS_00025777	XLOC_015265	-	lncRNA	26.7627	3.52762	2.92345	0.00141511	0.0355126	mmu-miR-5126	30.4974	5.65546	2.0107	5.18e-05	0.00284	TCONS_00022043	20656	Sod2	transcript	6.07359	0.19545	4.95768	0.0002461	0.0276354
TCONS_00025777	XLOC_015265	-	lncRNA	26.7627	3.52762	2.92345	0.00141511	0.0355126	mmu-miR-5126	30.4974	5.65546	2.0107	5.18e-05	0.00284	TCONS_00022742	30957	Mapk8ip3	transcript	0.033413	2.79614	-6.38688	0.000274522	0.0276354
TCONS_00022949	118568312	LOC118568312	lncRNA	27.2217	0	Inf	0.000820671	0.0276354	mmu-miR-5126	30.4974	5.65546	2.0107	5.18e-05	0.00284	NM_019694.2	56384	Letm1	transcript	5.73717	11.2145	-0.966953	0.000238425	0.0276354
TCONS_00022949	118568312	LOC118568312	lncRNA	27.2217	0	Inf	0.000820671	0.0276354	mmu-miR-5126	30.4974	5.65546	2.0107	5.18e-05	0.00284	NM_027044.3	56612	Pfdn5	transcript	62.793	47.0569	0.416198	0.00093278	0.0292165
TCONS_00022949	118568312	LOC118568312	lncRNA	27.2217	0	Inf	0.000820671	0.0276354	mmu-miR-5126	30.4974	5.65546	2.0107	5.18e-05	0.00284	XM_030255147.2	381290	Atp2b4	transcript	1.79149	0	Inf	0.000233871	0.0276354
TCONS_00022949	118568312	LOC118568312	lncRNA	27.2217	0	Inf	0.000820671	0.0276354	mmu-miR-5126	30.4974	5.65546	2.0107	5.18e-05	0.00284	XM_036165784.1	12321	Calu	transcript	10.5439	16.3948	-0.636826	0.00157708	0.0372453
TCONS_00022949	118568312	LOC118568312	lncRNA	27.2217	0	Inf	0.000820671	0.0276354	mmu-miR-5126	30.4974	5.65546	2.0107	5.18e-05	0.00284	NM_008226.2	15166	Hcn2	transcript	0.545519	4.3639	-2.99992	0.000415767	0.0276354
TCONS_00022949	118568312	LOC118568312	lncRNA	27.2217	0	Inf	0.000820671	0.0276354	mmu-miR-5126	30.4974	5.65546	2.0107	5.18e-05	0.00284	NM_026524.4	68041	Mid1ip1	transcript	37.9267	30.3802	0.320079	0.000987289	0.0299274
TCONS_00022949	118568312	LOC118568312	lncRNA	27.2217	0	Inf	0.000820671	0.0276354	mmu-miR-5126	30.4974	5.65546	2.0107	5.18e-05	0.00284	XM_006504490.4	66711	Sbds	transcript	5.04204	0.162342	4.9569	0.000582299	0.0276354
TCONS_00022949	118568312	LOC118568312	lncRNA	27.2217	0	Inf	0.000820671	0.0276354	mmu-miR-5126	30.4974	5.65546	2.0107	5.18e-05	0.00284	NM_008688.3	18029	Nfic	transcript	4.59623	14.0914	-1.61629	0.00200236	0.0419257
TCONS_00022949	118568312	LOC118568312	lncRNA	27.2217	0	Inf	0.000820671	0.0276354	mmu-miR-5126	30.4974	5.65546	2.0107	5.18e-05	0.00284	TCONS_00022043	20656	Sod2	transcript	6.07359	0.19545	4.95768	0.0002461	0.0276354
TCONS_00022949	118568312	LOC118568312	lncRNA	27.2217	0	Inf	0.000820671	0.0276354	mmu-miR-5126	30.4974	5.65546	2.0107	5.18e-05	0.00284	TCONS_00022742	30957	Mapk8ip3	transcript	0.033413	2.79614	-6.38688	0.000274522	0.0276354
TCONS_00025779	XLOC_015265	-	lncRNA	12.4547	0	Inf	0.000820671	0.0276354	mmu-miR-5126	30.4974	5.65546	2.0107	5.18e-05	0.00284	NM_019694.2	56384	Letm1	transcript	5.73717	11.2145	-0.966953	0.000238425	0.0276354
TCONS_00025779	XLOC_015265	-	lncRNA	12.4547	0	Inf	0.000820671	0.0276354	mmu-miR-5126	30.4974	5.65546	2.0107	5.18e-05	0.00284	NM_027044.3	56612	Pfdn5	transcript	62.793	47.0569	0.416198	0.00093278	0.0292165
TCONS_00025779	XLOC_015265	-	lncRNA	12.4547	0	Inf	0.000820671	0.0276354	mmu-miR-5126	30.4974	5.65546	2.0107	5.18e-05	0.00284	XM_030255147.2	381290	Atp2b4	transcript	1.79149	0	Inf	0.000233871	0.0276354
TCONS_00025779	XLOC_015265	-	lncRNA	12.4547	0	Inf	0.000820671	0.0276354	mmu-miR-5126	30.4974	5.65546	2.0107	5.18e-05	0.00284	XM_036165784.1	12321	Calu	transcript	10.5439	16.3948	-0.636826	0.00157708	0.0372453
TCONS_00025779	XLOC_015265	-	lncRNA	12.4547	0	Inf	0.000820671	0.0276354	mmu-miR-5126	30.4974	5.65546	2.0107	5.18e-05	0.00284	NM_008226.2	15166	Hcn2	transcript	0.545519	4.3639	-2.99992	0.000415767	0.0276354
TCONS_00025779	XLOC_015265	-	lncRNA	12.4547	0	Inf	0.000820671	0.0276354	mmu-miR-5126	30.4974	5.65546	2.0107	5.18e-05	0.00284	NM_026524.4	68041	Mid1ip1	transcript	37.9267	30.3802	0.320079	0.000987289	0.0299274
TCONS_00025779	XLOC_015265	-	lncRNA	12.4547	0	Inf	0.000820671	0.0276354	mmu-miR-5126	30.4974	5.65546	2.0107	5.18e-05	0.00284	XM_006504490.4	66711	Sbds	transcript	5.04204	0.162342	4.9569	0.000582299	0.0276354
TCONS_00025779	XLOC_015265	-	lncRNA	12.4547	0	Inf	0.000820671	0.0276354	mmu-miR-5126	30.4974	5.65546	2.0107	5.18e-05	0.00284	NM_008688.3	18029	Nfic	transcript	4.59623	14.0914	-1.61629	0.00200236	0.0419257
TCONS_00025779	XLOC_015265	-	lncRNA	12.4547	0	Inf	0.000820671	0.0276354	mmu-miR-5126	30.4974	5.65546	2.0107	5.18e-05	0.00284	TCONS_00022043	20656	Sod2	transcript	6.07359	0.19545	4.95768	0.0002461	0.0276354
TCONS_00025779	XLOC_015265	-	lncRNA	12.4547	0	Inf	0.000820671	0.0276354	mmu-miR-5126	30.4974	5.65546	2.0107	5.18e-05	0.00284	TCONS_00022742	30957	Mapk8ip3	transcript	0.033413	2.79614	-6.38688	0.000274522	0.0276354
NR_030738.1	69221	2410006H16Rik	lncRNA	5.19583	5.60683	-0.109831	0.00176592	0.0387359	mmu-miR-214-3p	866.854	544.158	0.66229	0.00013468	0.0046466	XM_006519358.3	65107	Lrp10	transcript	2.10967	0.25084	3.07218	0.00255949	0.0482407
NR_030738.1	69221	2410006H16Rik	lncRNA	5.19583	5.60683	-0.109831	0.00176592	0.0387359	mmu-miR-214-3p	866.854	544.158	0.66229	0.00013468	0.0046466	TCONS_00004132	229663	Csde1	transcript	48.2189	63.0905	-0.387826	0.0012973	0.0342571
NR_030738.1	69221	2410006H16Rik	lncRNA	5.19583	5.60683	-0.109831	0.00176592	0.0387359	mmu-miR-214-3p	866.854	544.158	0.66229	0.00013468	0.0046466	NM_007395.4	11479	Acvr1b	transcript	6.46432	3.77857	0.774661	0.000388991	0.0276354
NR_030738.1	69221	2410006H16Rik	lncRNA	5.19583	5.60683	-0.109831	0.00176592	0.0387359	mmu-miR-214-3p	866.854	544.158	0.66229	0.00013468	0.0046466	TCONS_00022043	20656	Sod2	transcript	6.07359	0.19545	4.95768	0.0002461	0.0276354
NR_030738.1	69221	2410006H16Rik	lncRNA	5.19583	5.60683	-0.109831	0.00176592	0.0387359	mmu-miR-214-3p	866.854	544.158	0.66229	0.00013468	0.0046466	NM_001013390.3	399548	Scn4b	transcript	2.15251	16.2847	-2.91942	0.00111032	0.0316263
NR_030738.1	69221	2410006H16Rik	lncRNA	5.19583	5.60683	-0.109831	0.00176592	0.0387359	mmu-miR-214-3p	866.854	544.158	0.66229	0.00013468	0.0046466	XM_006503677.4	11518	Add1	transcript	1.28784	0.00563833	7.83547	0.000849239	0.028103
NR_030738.1	69221	2410006H16Rik	lncRNA	5.19583	5.60683	-0.109831	0.00176592	0.0387359	mmu-miR-214-3p	866.854	544.158	0.66229	0.00013468	0.0046466	NM_001077184.1	12215	Bsg	transcript	229.288	397.283	-0.793008	0.0014193	0.0355126
NR_030738.1	69221	2410006H16Rik	lncRNA	5.19583	5.60683	-0.109831	0.00176592	0.0387359	mmu-miR-214-3p	866.854	544.158	0.66229	0.00013468	0.0046466	XM_006507175.4	101706	Numa1	transcript	2.05864	1.25498	0.714031	0.00217807	0.0438821
NR_030738.1	69221	2410006H16Rik	lncRNA	5.19583	5.60683	-0.109831	0.00176592	0.0387359	mmu-miR-214-3p	866.854	544.158	0.66229	0.00013468	0.0046466	XM_006538665.4	192185	Nadk	transcript	0.972007	0.0104583	6.53824	0.00196035	0.0413468
NR_030738.1	69221	2410006H16Rik	lncRNA	5.19583	5.60683	-0.109831	0.00176592	0.0387359	mmu-miR-214-3p	866.854	544.158	0.66229	0.00013468	0.0046466	NM_026524.4	68041	Mid1ip1	transcript	37.9267	30.3802	0.320079	0.000987289	0.0299274
NR_030738.1	69221	2410006H16Rik	lncRNA	5.19583	5.60683	-0.109831	0.00176592	0.0387359	mmu-miR-214-3p	866.854	544.158	0.66229	0.00013468	0.0046466	XM_036157952.1	12908	Crat	transcript	3.05654	0	Inf	5.87e-05	0.0211184
NR_030738.1	69221	2410006H16Rik	lncRNA	5.19583	5.60683	-0.109831	0.00176592	0.0387359	mmu-miR-214-3p	866.854	544.158	0.66229	0.00013468	0.0046466	NM_011293.2	20022	Polr2j	transcript	13.2814	15.4381	-0.217088	0.000690938	0.0276354
NR_030738.1	69221	2410006H16Rik	lncRNA	5.19583	5.60683	-0.109831	0.00176592	0.0387359	mmu-miR-214-3p	866.854	544.158	0.66229	0.00013468	0.0046466	NM_013799.3	11907	Ate1	transcript	1.05172	0.261099	2.01008	0.0019568	0.0413468
NR_030738.1	69221	2410006H16Rik	lncRNA	5.19583	5.60683	-0.109831	0.00176592	0.0387359	mmu-miR-214-3p	866.854	544.158	0.66229	0.00013468	0.0046466	NM_022032.4	64058	Perp	transcript	119.731	36.8542	1.6999	0.00103486	0.0304533
NR_030738.1	69221	2410006H16Rik	lncRNA	5.19583	5.60683	-0.109831	0.00176592	0.0387359	mmu-miR-214-3p	866.854	544.158	0.66229	0.00013468	0.0046466	NM_130449.2	140792	Colec12	transcript	3.99678	3.31964	0.26781	0.00250276	0.0477182
NR_030738.1	69221	2410006H16Rik	lncRNA	5.19583	5.60683	-0.109831	0.00176592	0.0387359	mmu-miR-214-3p	866.854	544.158	0.66229	0.00013468	0.0046466	NM_020332.4	11732	Ank	transcript	34.408	47.7049	-0.471394	9.3e-06	0.0155632
NR_030738.1	69221	2410006H16Rik	lncRNA	5.19583	5.60683	-0.109831	0.00176592	0.0387359	mmu-miR-214-3p	866.854	544.158	0.66229	0.00013468	0.0046466	NM_146243.2	66713	Actr2	transcript	29.0525	22.8911	0.343875	0.00149481	0.0362404
NR_030738.1	69221	2410006H16Rik	lncRNA	5.19583	5.60683	-0.109831	0.00176592	0.0387359	mmu-miR-214-3p	866.854	544.158	0.66229	0.00013468	0.0046466	NM_145605.2	234825	Klhdc4	transcript	1.15389	3.19303	-1.46842	0.000484263	0.0276354
NR_030738.1	69221	2410006H16Rik	lncRNA	5.19583	5.60683	-0.109831	0.00176592	0.0387359	mmu-miR-214-3p	866.854	544.158	0.66229	0.00013468	0.0046466	NM_009128.2	20250	Scd2	transcript	5.03621	2.28079	1.14281	0.00036858	0.0276354
NR_030738.1	69221	2410006H16Rik	lncRNA	5.19583	5.60683	-0.109831	0.00176592	0.0387359	mmu-miR-214-3p	866.854	544.158	0.66229	0.00013468	0.0046466	NM_146169.2	232164	Paip2b	transcript	8.94612	8.43108	0.0855459	0.00119144	0.0329033
NR_030738.1	69221	2410006H16Rik	lncRNA	5.19583	5.60683	-0.109831	0.00176592	0.0387359	mmu-miR-214-3p	866.854	544.158	0.66229	0.00013468	0.0046466	TCONS_00025423	66158	Rtl8a	transcript	1.29636	0	Inf	0.000820671	0.0276354
NR_030738.1	69221	2410006H16Rik	lncRNA	5.19583	5.60683	-0.109831	0.00176592	0.0387359	mmu-miR-214-3p	866.854	544.158	0.66229	0.00013468	0.0046466	NM_007616.4	12389	Cav1	transcript	43.4254	41.8983	0.0516465	0.000217852	0.0276354
NR_030738.1	69221	2410006H16Rik	lncRNA	5.19583	5.60683	-0.109831	0.00176592	0.0387359	mmu-miR-214-3p	866.854	544.158	0.66229	0.00013468	0.0046466	XM_036157306.1	217463	Snx13	transcript	1.9793	0	Inf	0.000820671	0.0276354
NR_030738.1	69221	2410006H16Rik	lncRNA	5.19583	5.60683	-0.109831	0.00176592	0.0387359	mmu-miR-214-3p	866.854	544.158	0.66229	0.00013468	0.0046466	XM_036162479.1	66691	Gapvd1	transcript	0.923883	0.00617833	7.22435	0.00246229	0.0472596
NR_030738.1	69221	2410006H16Rik	lncRNA	5.19583	5.60683	-0.109831	0.00176592	0.0387359	mmu-miR-214-3p	866.854	544.158	0.66229	0.00013468	0.0046466	NM_026919.1	69038	Tmem258	transcript	30.5924	45.4779	-0.571991	0.00175494	0.0386422
NR_030738.1	69221	2410006H16Rik	lncRNA	5.19583	5.60683	-0.109831	0.00176592	0.0387359	mmu-miR-214-3p	866.854	544.158	0.66229	0.00013468	0.0046466	TCONS_00019782	50527	Ero1a	transcript	1.12978	0	Inf	0.000820671	0.0276354
NR_030738.1	69221	2410006H16Rik	lncRNA	5.19583	5.60683	-0.109831	0.00176592	0.0387359	mmu-miR-214-3p	866.854	544.158	0.66229	0.00013468	0.0046466	TCONS_00000691	320404	Itpkb	transcript	2.74831	0	Inf	0.00022582	0.0276354
NR_030738.1	69221	2410006H16Rik	lncRNA	5.19583	5.60683	-0.109831	0.00176592	0.0387359	mmu-miR-214-3p	866.854	544.158	0.66229	0.00013468	0.0046466	XM_011246234.2	106522	Pkdcc	transcript	0.975937	0	Inf	0.000820671	0.0276354
NR_030738.1	69221	2410006H16Rik	lncRNA	5.19583	5.60683	-0.109831	0.00176592	0.0387359	mmu-miR-214-3p	866.854	544.158	0.66229	0.00013468	0.0046466	XM_006517134.5	18193	Nsd1	transcript	1.9852	0.448937	2.1447	0.00060106	0.0276354
NR_030738.1	69221	2410006H16Rik	lncRNA	5.19583	5.60683	-0.109831	0.00176592	0.0387359	mmu-miR-214-3p	866.854	544.158	0.66229	0.00013468	0.0046466	NM_010633.4	16589	Uhmk1	transcript	7.61792	5.62359	0.437905	0.00058092	0.0276354
NR_030738.1	69221	2410006H16Rik	lncRNA	5.19583	5.60683	-0.109831	0.00176592	0.0387359	mmu-miR-214-3p	866.854	544.158	0.66229	0.00013468	0.0046466	NM_016709.2	11992	Auh	transcript	23.1108	25.9264	-0.165855	0.00124159	0.0335637
NR_030738.1	69221	2410006H16Rik	lncRNA	5.19583	5.60683	-0.109831	0.00176592	0.0387359	mmu-miR-214-3p	866.854	544.158	0.66229	0.00013468	0.0046466	XM_030246370.1	72729	Cdc42se2	transcript	1.75393	0.133176	3.71919	3e-05	0.0155632
NR_030738.1	69221	2410006H16Rik	lncRNA	5.19583	5.60683	-0.109831	0.00176592	0.0387359	mmu-miR-214-3p	866.854	544.158	0.66229	0.00013468	0.0046466	XM_006504490.4	66711	Sbds	transcript	5.04204	0.162342	4.9569	0.000582299	0.0276354
NR_030738.1	69221	2410006H16Rik	lncRNA	5.19583	5.60683	-0.109831	0.00176592	0.0387359	mmu-miR-214-3p	866.854	544.158	0.66229	0.00013468	0.0046466	NM_027859.3	71673	Rnf215	transcript	2.26533	2.64791	-0.22513	0.00109052	0.0314747
NR_030738.1	69221	2410006H16Rik	lncRNA	5.19583	5.60683	-0.109831	0.00176592	0.0387359	mmu-miR-214-3p	866.854	544.158	0.66229	0.00013468	0.0046466	TCONS_00017675	68519	Eml1	transcript	11.0496	10.9045	0.0190772	0.00239943	0.0465183
NR_030738.1	69221	2410006H16Rik	lncRNA	5.19583	5.60683	-0.109831	0.00176592	0.0387359	mmu-miR-214-3p	866.854	544.158	0.66229	0.00013468	0.0046466	NM_177411.4	19344	Rab5b	transcript	15.3906	17.862	-0.214852	0.000321654	0.0276354
NR_030738.1	69221	2410006H16Rik	lncRNA	5.19583	5.60683	-0.109831	0.00176592	0.0387359	mmu-miR-214-3p	866.854	544.158	0.66229	0.00013468	0.0046466	TCONS_00025632	14605	Tsc22d3	transcript	6.76223	7.56572	-0.161979	0.00193513	0.0411922
NR_030738.1	69221	2410006H16Rik	lncRNA	5.19583	5.60683	-0.109831	0.00176592	0.0387359	mmu-miR-214-3p	866.854	544.158	0.66229	0.00013468	0.0046466	XM_030248555.2	239555	Mief1	transcript	1.40417	0.071697	4.29166	0.00216897	0.0438208
NR_030738.1	69221	2410006H16Rik	lncRNA	5.19583	5.60683	-0.109831	0.00176592	0.0387359	mmu-miR-214-3p	866.854	544.158	0.66229	0.00013468	0.0046466	TCONS_00011889	16337	Insr	transcript	3.80413	0	Inf	3.51e-05	0.0155632
NR_030738.1	69221	2410006H16Rik	lncRNA	5.19583	5.60683	-0.109831	0.00176592	0.0387359	mmu-miR-214-3p	866.854	544.158	0.66229	0.00013468	0.0046466	TCONS_00023739	76594	Dnajc18	transcript	1.93372	0	Inf	0.000820671	0.0276354
NR_030738.1	69221	2410006H16Rik	lncRNA	5.19583	5.60683	-0.109831	0.00176592	0.0387359	mmu-miR-214-3p	866.854	544.158	0.66229	0.00013468	0.0046466	NM_145929.2	106039	Gga1	transcript	10.8709	8.79062	0.306438	0.0015586	0.0372453
NR_030738.1	69221	2410006H16Rik	lncRNA	5.19583	5.60683	-0.109831	0.00176592	0.0387359	mmu-miR-214-3p	866.854	544.158	0.66229	0.00013468	0.0046466	TCONS_00001258	116847	Prelp	transcript	1.45639	0	Inf	0.000820671	0.0276354
NR_030738.1	69221	2410006H16Rik	lncRNA	5.19583	5.60683	-0.109831	0.00176592	0.0387359	mmu-miR-214-3p	866.854	544.158	0.66229	0.00013468	0.0046466	NM_019774.5	56399	Akap8	transcript	4.41498	4.61893	-0.0651514	0.0020109	0.0420282
NR_030738.1	69221	2410006H16Rik	lncRNA	5.19583	5.60683	-0.109831	0.00176592	0.0387359	mmu-miR-214-3p	866.854	544.158	0.66229	0.00013468	0.0046466	NM_001017429.2	12856	Cox17	transcript	100.01	129.573	-0.373622	0.00264968	0.0491363
NR_030738.1	69221	2410006H16Rik	lncRNA	5.19583	5.60683	-0.109831	0.00176592	0.0387359	mmu-miR-214-3p	866.854	544.158	0.66229	0.00013468	0.0046466	XM_011245351.4	223455	Marchf6	transcript	4.21198	0.316444	3.73447	0.00123918	0.0335637
NR_030738.1	69221	2410006H16Rik	lncRNA	5.19583	5.60683	-0.109831	0.00176592	0.0387359	mmu-miR-214-3p	866.854	544.158	0.66229	0.00013468	0.0046466	NM_019764.2	56332	Amotl2	transcript	14.284	9.48432	0.590781	0.000290535	0.0276354
NR_030738.1	69221	2410006H16Rik	lncRNA	5.19583	5.60683	-0.109831	0.00176592	0.0387359	mmu-miR-214-3p	866.854	544.158	0.66229	0.00013468	0.0046466	NM_133831.3	68077	Nop53	transcript	25.343	23.991	0.0790944	0.000321251	0.0276354
NR_030738.1	69221	2410006H16Rik	lncRNA	5.19583	5.60683	-0.109831	0.00176592	0.0387359	mmu-miR-214-3p	866.854	544.158	0.66229	0.00013468	0.0046466	NM_009776.3	12258	Serping1	transcript	16.347	19.022	-0.218642	0.000205943	0.0276354
NR_030738.1	69221	2410006H16Rik	lncRNA	5.19583	5.60683	-0.109831	0.00176592	0.0387359	mmu-miR-214-3p	866.854	544.158	0.66229	0.00013468	0.0046466	NM_011838.4	23936	Lynx1	transcript	25.7672	40.3626	-0.647487	0.000722116	0.0276354
NR_030738.1	69221	2410006H16Rik	lncRNA	5.19583	5.60683	-0.109831	0.00176592	0.0387359	mmu-miR-214-3p	866.854	544.158	0.66229	0.00013468	0.0046466	NM_011435.3	20657	Sod3	transcript	6.60321	9.08811	-0.460813	0.00117059	0.0326432
NR_030738.1	69221	2410006H16Rik	lncRNA	5.19583	5.60683	-0.109831	0.00176592	0.0387359	mmu-miR-214-3p	866.854	544.158	0.66229	0.00013468	0.0046466	XM_030250546.2	56386	B4galt6	transcript	1.70533	0.00590867	8.17301	0.00086113	0.0281727
NR_030738.1	69221	2410006H16Rik	lncRNA	5.19583	5.60683	-0.109831	0.00176592	0.0387359	mmu-miR-214-3p	866.854	544.158	0.66229	0.00013468	0.0046466	XM_030243724.1	80914	Uck2	transcript	2.38203	0.0179517	7.05193	0.000395132	0.0276354
NR_030738.1	69221	2410006H16Rik	lncRNA	5.19583	5.60683	-0.109831	0.00176592	0.0387359	mmu-miR-214-3p	866.854	544.158	0.66229	0.00013468	0.0046466	NM_008828.3	18655	Pgk1	transcript	83.217	79.3525	0.068602	0.00229255	0.0452466
NR_030738.1	69221	2410006H16Rik	lncRNA	5.19583	5.60683	-0.109831	0.00176592	0.0387359	mmu-miR-214-3p	866.854	544.158	0.66229	0.00013468	0.0046466	XM_036161354.1	228602	4930402H24Rik	transcript	1.31164	0.00155	9.72489	8.14e-05	0.0253471
NR_030738.1	69221	2410006H16Rik	lncRNA	5.19583	5.60683	-0.109831	0.00176592	0.0387359	mmu-miR-214-3p	866.854	544.158	0.66229	0.00013468	0.0046466	NM_029182.1	75141	Rasd2	transcript	5.28095	1.10421	2.25778	0.00103307	0.0304533
NR_030738.1	69221	2410006H16Rik	lncRNA	5.19583	5.60683	-0.109831	0.00176592	0.0387359	mmu-miR-214-3p	866.854	544.158	0.66229	0.00013468	0.0046466	NM_173735.3	217732	Cipc	transcript	2.22002	0.086604	4.68	0.000543181	0.0276354
NR_030738.1	69221	2410006H16Rik	lncRNA	5.19583	5.60683	-0.109831	0.00176592	0.0387359	mmu-miR-214-3p	866.854	544.158	0.66229	0.00013468	0.0046466	NM_010385.2	14976	Pfdn6	transcript	13.2552	17.8863	-0.4323	0.00108699	0.0314517
NR_030738.1	69221	2410006H16Rik	lncRNA	5.19583	5.60683	-0.109831	0.00176592	0.0387359	mmu-miR-214-3p	866.854	544.158	0.66229	0.00013468	0.0046466	NM_001161420.1	22359	Vldlr	transcript	2.8505	7.64704	-1.42369	0.000891982	0.0287892
NR_030738.1	69221	2410006H16Rik	lncRNA	5.19583	5.60683	-0.109831	0.00176592	0.0387359	mmu-miR-214-3p	866.854	544.158	0.66229	0.00013468	0.0046466	NM_008688.3	18029	Nfic	transcript	4.59623	14.0914	-1.61629	0.00200236	0.0419257
NR_030738.1	69221	2410006H16Rik	lncRNA	5.19583	5.60683	-0.109831	0.00176592	0.0387359	mmu-miR-214-3p	866.854	544.158	0.66229	0.00013468	0.0046466	NM_008338.4	15980	Ifngr2	transcript	40.1831	60.2437	-0.584221	7.98e-05	0.0253471
NR_030738.1	69221	2410006H16Rik	lncRNA	5.19583	5.60683	-0.109831	0.00176592	0.0387359	mmu-miR-214-3p	866.854	544.158	0.66229	0.00013468	0.0046466	NM_001115132.2	52683	Ncaph2	transcript	3.1926	0.540685	2.56187	0.00108613	0.0314517
NR_030738.1	69221	2410006H16Rik	lncRNA	5.19583	5.60683	-0.109831	0.00176592	0.0387359	mmu-miR-214-3p	866.854	544.158	0.66229	0.00013468	0.0046466	NM_021284.6	16653	Kras	transcript	6.68577	7.24422	-0.115735	0.000780807	0.0276354
NR_030738.1	69221	2410006H16Rik	lncRNA	5.19583	5.60683	-0.109831	0.00176592	0.0387359	mmu-miR-214-3p	866.854	544.158	0.66229	0.00013468	0.0046466	NM_025407.2	22273	Uqcrc1	transcript	305.19	377.485	-0.306711	0.000478795	0.0276354
NR_030738.1	69221	2410006H16Rik	lncRNA	5.19583	5.60683	-0.109831	0.00176592	0.0387359	mmu-miR-214-3p	866.854	544.158	0.66229	0.00013468	0.0046466	XM_030245515.2	12808	Cobl	transcript	1.22489	0.014136	6.43713	0.000731975	0.0276354
NR_030738.1	69221	2410006H16Rik	lncRNA	5.19583	5.60683	-0.109831	0.00176592	0.0387359	mmu-miR-214-3p	866.854	544.158	0.66229	0.00013468	0.0046466	NM_175236.5	76187	Adhfe1	transcript	5.22125	5.88058	-0.171562	0.00131045	0.0342571
NR_030738.1	69221	2410006H16Rik	lncRNA	5.19583	5.60683	-0.109831	0.00176592	0.0387359	mmu-miR-214-3p	866.854	544.158	0.66229	0.00013468	0.0046466	NM_197990.3	69399	1700025G04Rik	transcript	6.52172	2.62541	1.31271	0.000479421	0.0276354
NR_030738.1	69221	2410006H16Rik	lncRNA	5.19583	5.60683	-0.109831	0.00176592	0.0387359	mmu-miR-214-3p	866.854	544.158	0.66229	0.00013468	0.0046466	NM_133664.3	16763	Lad1	transcript	2.17237	0.171618	3.662	0.000206847	0.0276354
NR_030738.1	69221	2410006H16Rik	lncRNA	5.19583	5.60683	-0.109831	0.00176592	0.0387359	mmu-miR-214-3p	866.854	544.158	0.66229	0.00013468	0.0046466	NM_198013.3	103841	Cuedc1	transcript	9.33807	8.4224	0.148893	0.0015783	0.0372453
NR_030738.1	69221	2410006H16Rik	lncRNA	5.19583	5.60683	-0.109831	0.00176592	0.0387359	mmu-miR-214-3p	866.854	544.158	0.66229	0.00013468	0.0046466	NM_001110844.1	12293	Cacna2d1	transcript	0.631283	4.45131	-2.81787	0.000493731	0.0276354
NR_030738.1	69221	2410006H16Rik	lncRNA	5.19583	5.60683	-0.109831	0.00176592	0.0387359	mmu-miR-214-3p	866.854	544.158	0.66229	0.00013468	0.0046466	NM_146193.2	83962	Btbd1	transcript	36.2804	34.6035	0.0682754	0.00168654	0.0382088
NR_030738.1	69221	2410006H16Rik	lncRNA	5.19583	5.60683	-0.109831	0.00176592	0.0387359	mmu-miR-214-3p	866.854	544.158	0.66229	0.00013468	0.0046466	NM_001355651.1	74182	Gpcpd1	transcript	1.98661	0.186929	3.40975	0.00197354	0.041549
NR_030738.1	69221	2410006H16Rik	lncRNA	5.19583	5.60683	-0.109831	0.00176592	0.0387359	mmu-miR-214-3p	866.854	544.158	0.66229	0.00013468	0.0046466	TCONS_00022742	30957	Mapk8ip3	transcript	0.033413	2.79614	-6.38688	0.000274522	0.0276354
NR_030738.1	69221	2410006H16Rik	lncRNA	5.19583	5.60683	-0.109831	0.00176592	0.0387359	mmu-miR-214-3p	866.854	544.158	0.66229	0.00013468	0.0046466	NM_025828.3	66890	Lman2	transcript	13.183	13.5281	-0.0372866	0.00183952	0.0400109
NR_030738.1	69221	2410006H16Rik	lncRNA	5.19583	5.60683	-0.109831	0.00176592	0.0387359	mmu-miR-214-3p	866.854	544.158	0.66229	0.00013468	0.0046466	NM_019694.2	56384	Letm1	transcript	5.73717	11.2145	-0.966953	0.000238425	0.0276354
NR_030738.1	69221	2410006H16Rik	lncRNA	5.19583	5.60683	-0.109831	0.00176592	0.0387359	mmu-miR-214-3p	866.854	544.158	0.66229	0.00013468	0.0046466	NM_011908.2	24109	Ubl3	transcript	7.77652	18.8816	-1.27979	2.2e-05	0.0155632
NR_030738.1	69221	2410006H16Rik	lncRNA	5.19583	5.60683	-0.109831	0.00176592	0.0387359	mmu-miR-214-3p	866.854	544.158	0.66229	0.00013468	0.0046466	NM_001164191.1	17772	Mtm1	transcript	4.86962	4.57993	0.0884856	0.00244339	0.0472115
NR_030738.1	69221	2410006H16Rik	lncRNA	5.19583	5.60683	-0.109831	0.00176592	0.0387359	mmu-miR-214-3p	866.854	544.158	0.66229	0.00013468	0.0046466	NM_001289702.1	83679	Pde4dip	transcript	26.0448	32.6548	-0.326299	0.00157065	0.0372453
NR_030738.1	69221	2410006H16Rik	lncRNA	5.19583	5.60683	-0.109831	0.00176592	0.0387359	mmu-miR-214-3p	866.854	544.158	0.66229	0.00013468	0.0046466	XM_036161998.1	241694	Ralgapa2	transcript	4.94291	0.169671	4.86455	0.000222044	0.0276354
NR_030738.1	69221	2410006H16Rik	lncRNA	5.19583	5.60683	-0.109831	0.00176592	0.0387359	mmu-miR-214-3p	866.854	544.158	0.66229	0.00013468	0.0046466	XM_036156454.1	19345	Rab5c	transcript	1.04576	0	Inf	0.000756013	0.0276354
NR_030738.1	69221	2410006H16Rik	lncRNA	5.19583	5.60683	-0.109831	0.00176592	0.0387359	mmu-miR-214-3p	866.854	544.158	0.66229	0.00013468	0.0046466	XM_036155419.1	84585	Rnf123	transcript	0.992394	0.075402	3.71824	0.00019691	0.0276354
NR_030738.1	69221	2410006H16Rik	lncRNA	5.19583	5.60683	-0.109831	0.00176592	0.0387359	mmu-miR-214-3p	866.854	544.158	0.66229	0.00013468	0.0046466	NM_028771.3	52132	Ccdc97	transcript	0.353089	5.23544	-3.89021	0.000248656	0.0276354
NR_030738.1	69221	2410006H16Rik	lncRNA	5.19583	5.60683	-0.109831	0.00176592	0.0387359	mmu-miR-214-3p	866.854	544.158	0.66229	0.00013468	0.0046466	TCONS_00007852	59008	Anapc5	transcript	3.69736	0	Inf	0.000820671	0.0276354
NR_030738.1	69221	2410006H16Rik	lncRNA	5.19583	5.60683	-0.109831	0.00176592	0.0387359	mmu-miR-214-3p	866.854	544.158	0.66229	0.00013468	0.0046466	TCONS_00020139	16880	Lifr	transcript	1.30271	0	Inf	0.000820671	0.0276354
NR_030738.1	69221	2410006H16Rik	lncRNA	5.19583	5.60683	-0.109831	0.00176592	0.0387359	mmu-miR-214-3p	866.854	544.158	0.66229	0.00013468	0.0046466	NM_178253.5	271005	Klhdc1	transcript	4.29811	8.4043	-0.967424	0.000211255	0.0276354
NR_030738.1	69221	2410006H16Rik	lncRNA	5.19583	5.60683	-0.109831	0.00176592	0.0387359	mmu-miR-214-3p	866.854	544.158	0.66229	0.00013468	0.0046466	NM_175523.5	243382	Ppm1k	transcript	41.3824	25.3879	0.704875	0.000348613	0.0276354
NR_030738.1	69221	2410006H16Rik	lncRNA	5.19583	5.60683	-0.109831	0.00176592	0.0387359	mmu-miR-214-3p	866.854	544.158	0.66229	0.00013468	0.0046466	NM_026275.4	67615	Ube2r2	transcript	5.99431	0.341337	4.13433	0.000853945	0.0281337
NR_030738.1	69221	2410006H16Rik	lncRNA	5.19583	5.60683	-0.109831	0.00176592	0.0387359	mmu-miR-214-3p	866.854	544.158	0.66229	0.00013468	0.0046466	NM_007798.3	13030	Ctsb	transcript	44.5757	45.1527	-0.018554	7.35e-05	0.0248953
NR_030738.1	69221	2410006H16Rik	lncRNA	5.19583	5.60683	-0.109831	0.00176592	0.0387359	mmu-miR-214-3p	866.854	544.158	0.66229	0.00013468	0.0046466	XM_006533995.4	67473	Slc47a1	transcript	1.20768	0.0603787	4.32205	0.000196345	0.0276354
NR_030738.1	69221	2410006H16Rik	lncRNA	5.19583	5.60683	-0.109831	0.00176592	0.0387359	mmu-miR-214-3p	866.854	544.158	0.66229	0.00013468	0.0046466	NM_008258.2	15374	Jpt1	transcript	29.7754	15.9326	0.90214	0.00268557	0.0494042
NR_030738.1	69221	2410006H16Rik	lncRNA	5.19583	5.60683	-0.109831	0.00176592	0.0387359	mmu-miR-214-3p	866.854	544.158	0.66229	0.00013468	0.0046466	XM_006516544.4	140580	Elmo1	transcript	0.964251	0	Inf	0.000820671	0.0276354
NR_030738.1	69221	2410006H16Rik	lncRNA	5.19583	5.60683	-0.109831	0.00176592	0.0387359	mmu-miR-214-3p	866.854	544.158	0.66229	0.00013468	0.0046466	XM_011239446.4	228026	Pdk1	transcript	3.2763	0	Inf	0.000820671	0.0276354
NR_030738.1	69221	2410006H16Rik	lncRNA	5.19583	5.60683	-0.109831	0.00176592	0.0387359	mmu-miR-214-3p	866.854	544.158	0.66229	0.00013468	0.0046466	TCONS_00002822	67512	Agpat2	transcript	1.95082	0	Inf	0.000820671	0.0276354
NR_030738.1	69221	2410006H16Rik	lncRNA	5.19583	5.60683	-0.109831	0.00176592	0.0387359	mmu-miR-214-3p	866.854	544.158	0.66229	0.00013468	0.0046466	NM_175398.4	109050	Inka2	transcript	2.56575	7.08752	-1.4659	0.00255544	0.0482407
NR_030738.1	69221	2410006H16Rik	lncRNA	5.19583	5.60683	-0.109831	0.00176592	0.0387359	mmu-miR-214-3p	866.854	544.158	0.66229	0.00013468	0.0046466	XM_030249575.2	18607	Pdpk1	transcript	3.59523	0	Inf	2.05e-05	0.0155632
NR_030738.1	69221	2410006H16Rik	lncRNA	5.19583	5.60683	-0.109831	0.00176592	0.0387359	mmu-miR-214-3p	866.854	544.158	0.66229	0.00013468	0.0046466	NM_001288613.1	245860	Atg9a	transcript	2.10893	0.14069	3.90593	0.000401703	0.0276354
NR_030738.1	69221	2410006H16Rik	lncRNA	5.19583	5.60683	-0.109831	0.00176592	0.0387359	mmu-miR-214-3p	866.854	544.158	0.66229	0.00013468	0.0046466	TCONS_00015185	14533	Bloc1s1	transcript	4.31854	0	Inf	0.000820671	0.0276354
NR_030738.1	69221	2410006H16Rik	lncRNA	5.19583	5.60683	-0.109831	0.00176592	0.0387359	mmu-miR-214-3p	866.854	544.158	0.66229	0.00013468	0.0046466	XM_017321605.3	27418	Mkln1	transcript	1.57045	0.0165473	6.56843	0.00103662	0.0304533
NR_030738.1	69221	2410006H16Rik	lncRNA	5.19583	5.60683	-0.109831	0.00176592	0.0387359	mmu-miR-214-3p	866.854	544.158	0.66229	0.00013468	0.0046466	NM_001310464.1	19699	Reln	transcript	1.91056	0	Inf	9.66e-05	0.0264941
NR_030738.1	69221	2410006H16Rik	lncRNA	5.19583	5.60683	-0.109831	0.00176592	0.0387359	mmu-miR-214-3p	866.854	544.158	0.66229	0.00013468	0.0046466	XM_036162790.1	19130	Prox1	transcript	1.35014	0.000200667	12.716	2.04e-05	0.0155632
NR_030738.1	69221	2410006H16Rik	lncRNA	5.19583	5.60683	-0.109831	0.00176592	0.0387359	mmu-miR-214-3p	866.854	544.158	0.66229	0.00013468	0.0046466	XM_036158471.1	15460	Hr	transcript	0	2.40576	#NAME?	0.0021495	0.0436572
NR_030738.1	69221	2410006H16Rik	lncRNA	5.19583	5.60683	-0.109831	0.00176592	0.0387359	mmu-miR-214-3p	866.854	544.158	0.66229	0.00013468	0.0046466	XM_006517452.5	76577	Faf2	transcript	0.845375	0	Inf	0.000820671	0.0276354
NR_030738.1	69221	2410006H16Rik	lncRNA	5.19583	5.60683	-0.109831	0.00176592	0.0387359	mmu-miR-214-3p	866.854	544.158	0.66229	0.00013468	0.0046466	NM_177673.2	230967	Cep104	transcript	3.10235	2.01391	0.623361	0.000626734	0.0276354
NR_030738.1	69221	2410006H16Rik	lncRNA	5.19583	5.60683	-0.109831	0.00176592	0.0387359	mmu-miR-214-3p	866.854	544.158	0.66229	0.00013468	0.0046466	TCONS_00002486	68295	Aar2	transcript	1.18122	0	Inf	0.000820671	0.0276354
NR_030738.1	69221	2410006H16Rik	lncRNA	5.19583	5.60683	-0.109831	0.00176592	0.0387359	mmu-miR-214-3p	866.854	544.158	0.66229	0.00013468	0.0046466	TCONS_00015789	107476	Acaca	transcript	0.855672	0.031853	4.74756	0.0012857	0.0341943
NR_030738.1	69221	2410006H16Rik	lncRNA	5.19583	5.60683	-0.109831	0.00176592	0.0387359	mmu-miR-214-3p	866.854	544.158	0.66229	0.00013468	0.0046466	NM_153794.4	108654	Fam210a	transcript	5.80425	4.32633	0.423966	0.000651079	0.0276354
NR_030738.1	69221	2410006H16Rik	lncRNA	5.19583	5.60683	-0.109831	0.00176592	0.0387359	mmu-miR-214-3p	866.854	544.158	0.66229	0.00013468	0.0046466	TCONS_00024433	73713	Rbm20	transcript	1.35106	0	Inf	0.000820671	0.0276354
NR_030738.1	69221	2410006H16Rik	lncRNA	5.19583	5.60683	-0.109831	0.00176592	0.0387359	mmu-miR-214-3p	866.854	544.158	0.66229	0.00013468	0.0046466	NM_009088.3	20019	Polr1a	transcript	5.17423	7.65806	-0.565635	0.000892474	0.0287892
NR_030738.1	69221	2410006H16Rik	lncRNA	5.19583	5.60683	-0.109831	0.00176592	0.0387359	mmu-miR-214-3p	866.854	544.158	0.66229	0.00013468	0.0046466	NM_001163379.1	55979	Agpat1	transcript	14.6579	11.2463	0.382229	0.000825619	0.0277196
NR_030738.1	69221	2410006H16Rik	lncRNA	5.19583	5.60683	-0.109831	0.00176592	0.0387359	mmu-miR-214-3p	866.854	544.158	0.66229	0.00013468	0.0046466	NM_145447.2	217721	Flvcr2	transcript	2.72949	0.849176	1.6845	0.00015539	0.0276354
NR_030738.1	69221	2410006H16Rik	lncRNA	5.19583	5.60683	-0.109831	0.00176592	0.0387359	mmu-miR-214-3p	866.854	544.158	0.66229	0.00013468	0.0046466	NM_001359505.1	77521	Mtus2	transcript	30.9488	21.1013	0.552555	0.000558842	0.0276354
NR_030738.1	69221	2410006H16Rik	lncRNA	5.19583	5.60683	-0.109831	0.00176592	0.0387359	mmu-miR-214-3p	866.854	544.158	0.66229	0.00013468	0.0046466	XM_030255147.2	381290	Atp2b4	transcript	1.79149	0	Inf	0.000233871	0.0276354
NR_030738.1	69221	2410006H16Rik	lncRNA	5.19583	5.60683	-0.109831	0.00176592	0.0387359	mmu-miR-214-3p	866.854	544.158	0.66229	0.00013468	0.0046466	TCONS_00001035	21961	Tns1	transcript	39.6786	2.46049	4.01134	0.00031257	0.0276354
NR_030738.1	69221	2410006H16Rik	lncRNA	5.19583	5.60683	-0.109831	0.00176592	0.0387359	mmu-miR-214-3p	866.854	544.158	0.66229	0.00013468	0.0046466	TCONS_00022612	225049	Ttc7	transcript	1.28356	2.38495	-0.893809	1.15e-05	0.0155632
NR_030738.1	69221	2410006H16Rik	lncRNA	5.19583	5.60683	-0.109831	0.00176592	0.0387359	mmu-miR-214-3p	866.854	544.158	0.66229	0.00013468	0.0046466	NM_011207.2	545622	Ptpn3	transcript	2.85143	0.047324	5.91297	0.000765875	0.0276354
NR_030738.1	69221	2410006H16Rik	lncRNA	5.19583	5.60683	-0.109831	0.00176592	0.0387359	mmu-miR-214-3p	866.854	544.158	0.66229	0.00013468	0.0046466	XM_036154088.1	319518	Pdpr	transcript	1.61977	3.72043	-1.19968	0.000122455	0.0276354
NR_030738.1	69221	2410006H16Rik	lncRNA	5.19583	5.60683	-0.109831	0.00176592	0.0387359	mmu-miR-214-3p	866.854	544.158	0.66229	0.00013468	0.0046466	NM_020486.2	57278	Bcam	transcript	97.5158	46.6059	1.06512	0.000167128	0.0276354
NR_030738.1	69221	2410006H16Rik	lncRNA	5.19583	5.60683	-0.109831	0.00176592	0.0387359	mmu-miR-214-3p	866.854	544.158	0.66229	0.00013468	0.0046466	TCONS_00020016	65246	Xpo7	transcript	4.13029	0.00722533	9.15896	0.00116536	0.0326432
NR_030738.1	69221	2410006H16Rik	lncRNA	5.19583	5.60683	-0.109831	0.00176592	0.0387359	mmu-miR-214-3p	866.854	544.158	0.66229	0.00013468	0.0046466	NM_009818.1	12385	Ctnna1	transcript	89.2245	90.2244	-0.0160775	0.000857497	0.0281337
NR_030738.1	69221	2410006H16Rik	lncRNA	5.19583	5.60683	-0.109831	0.00176592	0.0387359	mmu-miR-214-3p	866.854	544.158	0.66229	0.00013468	0.0046466	NM_001347446.1	94089	Trim7	transcript	1.16147	7.15854	-2.62371	0.00045152	0.0276354
NR_030738.1	69221	2410006H16Rik	lncRNA	5.19583	5.60683	-0.109831	0.00176592	0.0387359	mmu-miR-214-3p	866.854	544.158	0.66229	0.00013468	0.0046466	TCONS_00012153	76808	Rpl18a	transcript	32.7855	0	Inf	2.77e-05	0.0155632
NR_030738.1	69221	2410006H16Rik	lncRNA	5.19583	5.60683	-0.109831	0.00176592	0.0387359	mmu-miR-214-3p	866.854	544.158	0.66229	0.00013468	0.0046466	XM_006534391.5	75580	Zbtb4	transcript	1.27003	0	Inf	0.000820671	0.0276354
NR_030738.1	69221	2410006H16Rik	lncRNA	5.19583	5.60683	-0.109831	0.00176592	0.0387359	mmu-miR-214-3p	866.854	544.158	0.66229	0.00013468	0.0046466	NM_054046.5	23854	Def8	transcript	8.18934	6.47494	0.33888	0.0016116	0.037419
NR_030738.1	69221	2410006H16Rik	lncRNA	5.19583	5.60683	-0.109831	0.00176592	0.0387359	mmu-miR-214-3p	866.854	544.158	0.66229	0.00013468	0.0046466	NM_024288.2	68477	Rmnd5a	transcript	14.9293	15.4847	-0.0526959	0.000690882	0.0276354
NR_030738.1	69221	2410006H16Rik	lncRNA	5.19583	5.60683	-0.109831	0.00176592	0.0387359	mmu-miR-214-3p	866.854	544.158	0.66229	0.00013468	0.0046466	TCONS_00022295	81877	Tnxb	transcript	1.75426	0	Inf	0.000820671	0.0276354
NR_030738.1	69221	2410006H16Rik	lncRNA	5.19583	5.60683	-0.109831	0.00176592	0.0387359	mmu-miR-214-3p	866.854	544.158	0.66229	0.00013468	0.0046466	NM_001165902.1	12387	Ctnnb1	transcript	1.01086	0.074119	3.76959	0.000164837	0.0276354
NR_030738.1	69221	2410006H16Rik	lncRNA	5.19583	5.60683	-0.109831	0.00176592	0.0387359	mmu-miR-214-3p	866.854	544.158	0.66229	0.00013468	0.0046466	NM_008138.5	14678	Gnai2	transcript	64.7581	38.7376	0.741328	0.000133889	0.0276354
NR_030738.1	69221	2410006H16Rik	lncRNA	5.19583	5.60683	-0.109831	0.00176592	0.0387359	mmu-miR-214-3p	866.854	544.158	0.66229	0.00013468	0.0046466	NM_001169577.1	22214	Ube2h	transcript	1.41218	0.0643033	4.45689	0.00189306	0.0407486
NR_030738.1	69221	2410006H16Rik	lncRNA	5.19583	5.60683	-0.109831	0.00176592	0.0387359	mmu-miR-214-3p	866.854	544.158	0.66229	0.00013468	0.0046466	NM_170760.3	233073	U2af1l4	transcript	10.7881	11.8091	-0.13046	0.00194872	0.0413468
NR_030738.1	69221	2410006H16Rik	lncRNA	5.19583	5.60683	-0.109831	0.00176592	0.0387359	mmu-miR-214-3p	866.854	544.158	0.66229	0.00013468	0.0046466	NM_011785.4	23797	Akt3	transcript	1.5986	0.0690953	4.53208	0.0015947	0.037419
NR_030738.1	69221	2410006H16Rik	lncRNA	5.19583	5.60683	-0.109831	0.00176592	0.0387359	mmu-miR-214-3p	866.854	544.158	0.66229	0.00013468	0.0046466	XM_006521705.3	107589	Mylk	transcript	3.13462	3.83408	-0.290594	0.00265995	0.0492416
NR_030738.1	69221	2410006H16Rik	lncRNA	5.19583	5.60683	-0.109831	0.00176592	0.0387359	mmu-miR-214-3p	866.854	544.158	0.66229	0.00013468	0.0046466	NM_138591.2	28030	Gfm1	transcript	34.2978	39.8161	-0.215235	0.00123449	0.0335637
NR_030738.1	69221	2410006H16Rik	lncRNA	5.19583	5.60683	-0.109831	0.00176592	0.0387359	mmu-miR-214-3p	866.854	544.158	0.66229	0.00013468	0.0046466	TCONS_00005210	21687	Tek	transcript	2.18464	0	Inf	0.000820671	0.0276354
NR_030738.1	69221	2410006H16Rik	lncRNA	5.19583	5.60683	-0.109831	0.00176592	0.0387359	mmu-miR-214-3p	866.854	544.158	0.66229	0.00013468	0.0046466	NM_053009.3	109910	Zfp91	transcript	24.0255	23.1627	0.0527611	0.000930839	0.0292165
NR_030738.1	69221	2410006H16Rik	lncRNA	5.19583	5.60683	-0.109831	0.00176592	0.0387359	mmu-miR-214-3p	866.854	544.158	0.66229	0.00013468	0.0046466	NM_024214.2	67952	Tomm20	transcript	10.2066	7.84903	0.378922	0.000773909	0.0276354
NR_030738.1	69221	2410006H16Rik	lncRNA	5.19583	5.60683	-0.109831	0.00176592	0.0387359	mmu-miR-214-3p	866.854	544.158	0.66229	0.00013468	0.0046466	NM_001012477.2	20315	Cxcl12	transcript	8.72303	23.6765	-1.44055	0.000741939	0.0276354
NR_030738.1	69221	2410006H16Rik	lncRNA	5.19583	5.60683	-0.109831	0.00176592	0.0387359	mmu-miR-214-3p	866.854	544.158	0.66229	0.00013468	0.0046466	NM_001013024.2	72607	Usp13	transcript	43.9871	44.7173	-0.0237507	0.000631592	0.0276354
NR_030738.1	69221	2410006H16Rik	lncRNA	5.19583	5.60683	-0.109831	0.00176592	0.0387359	mmu-miR-214-3p	866.854	544.158	0.66229	0.00013468	0.0046466	XM_030250848.1	228998	Arfgap1	transcript	1.08784	0	Inf	0.000820671	0.0276354
NR_030738.1	69221	2410006H16Rik	lncRNA	5.19583	5.60683	-0.109831	0.00176592	0.0387359	mmu-miR-214-3p	866.854	544.158	0.66229	0.00013468	0.0046466	NM_001081979.2	17257	Mecp2	transcript	3.25013	3.79955	-0.22533	0.000372863	0.0276354
NR_030738.1	69221	2410006H16Rik	lncRNA	5.19583	5.60683	-0.109831	0.00176592	0.0387359	mmu-miR-214-3p	866.854	544.158	0.66229	0.00013468	0.0046466	NM_053159.4	94062	Mrpl3	transcript	20.8991	24.078	-0.204272	1.09e-05	0.0155632
NR_030738.1	69221	2410006H16Rik	lncRNA	5.19583	5.60683	-0.109831	0.00176592	0.0387359	mmu-miR-214-3p	866.854	544.158	0.66229	0.00013468	0.0046466	NM_001253757.1	66471	Anp32e	transcript	1.72974	1.29992	0.412137	0.00160311	0.037419
NR_030738.1	69221	2410006H16Rik	lncRNA	5.19583	5.60683	-0.109831	0.00176592	0.0387359	mmu-miR-214-3p	866.854	544.158	0.66229	0.00013468	0.0046466	NM_133808.5	110611	Hdlbp	transcript	60.027	71.0376	-0.242973	0.00219802	0.0438821
NR_030738.1	69221	2410006H16Rik	lncRNA	5.19583	5.60683	-0.109831	0.00176592	0.0387359	mmu-miR-214-3p	866.854	544.158	0.66229	0.00013468	0.0046466	NM_001360132.1	20130	Rras	transcript	1.46932	0	Inf	0.000820671	0.0276354
NR_030738.1	69221	2410006H16Rik	lncRNA	5.19583	5.60683	-0.109831	0.00176592	0.0387359	mmu-miR-214-3p	866.854	544.158	0.66229	0.00013468	0.0046466	XM_036165784.1	12321	Calu	transcript	10.5439	16.3948	-0.636826	0.00157708	0.0372453
NR_030738.1	69221	2410006H16Rik	lncRNA	5.19583	5.60683	-0.109831	0.00176592	0.0387359	mmu-miR-214-3p	866.854	544.158	0.66229	0.00013468	0.0046466	XM_006530878.1	234595	Slc38a7	transcript	0.923806	0.0383027	4.59207	3.17e-05	0.0155632
NR_030738.1	69221	2410006H16Rik	lncRNA	5.19583	5.60683	-0.109831	0.00176592	0.0387359	mmu-miR-214-3p	866.854	544.158	0.66229	0.00013468	0.0046466	TCONS_00020910	223697	Sun2	transcript	2.54478	0	Inf	0.000820671	0.0276354
NR_030738.1	69221	2410006H16Rik	lncRNA	5.19583	5.60683	-0.109831	0.00176592	0.0387359	mmu-miR-214-3p	866.854	544.158	0.66229	0.00013468	0.0046466	NM_010489.2	15587	Hyal2	transcript	3.40604	0.443805	2.94009	0.00142619	0.0355126
NR_030738.1	69221	2410006H16Rik	lncRNA	5.19583	5.60683	-0.109831	0.00176592	0.0387359	mmu-miR-214-3p	866.854	544.158	0.66229	0.00013468	0.0046466	NM_024454.1	216344	Rab21	transcript	0.620409	17.8734	-4.84845	0.000508496	0.0276354
NR_030738.1	69221	2410006H16Rik	lncRNA	5.19583	5.60683	-0.109831	0.00176592	0.0387359	mmu-miR-214-3p	866.854	544.158	0.66229	0.00013468	0.0046466	NM_001252638.1	69288	Rhobtb1	transcript	0.0385657	2.18074	-5.82136	0.00249007	0.0476339
NR_030738.1	69221	2410006H16Rik	lncRNA	5.19583	5.60683	-0.109831	0.00176592	0.0387359	mmu-miR-214-3p	866.854	544.158	0.66229	0.00013468	0.0046466	NM_177059.3	320027	Fstl4	transcript	2.66003	0	Inf	0.00041668	0.0276354
NR_030738.1	69221	2410006H16Rik	lncRNA	5.19583	5.60683	-0.109831	0.00176592	0.0387359	mmu-miR-214-3p	866.854	544.158	0.66229	0.00013468	0.0046466	NM_009634.6	11564	Adsl	transcript	8.39214	7.60029	0.142984	0.000689457	0.0276354
NR_030738.1	69221	2410006H16Rik	lncRNA	5.19583	5.60683	-0.109831	0.00176592	0.0387359	mmu-miR-214-3p	866.854	544.158	0.66229	0.00013468	0.0046466	XM_006522138.4	252870	Usp7	transcript	1.00697	0	Inf	0.000820671	0.0276354
NR_030738.1	69221	2410006H16Rik	lncRNA	5.19583	5.60683	-0.109831	0.00176592	0.0387359	mmu-miR-214-3p	866.854	544.158	0.66229	0.00013468	0.0046466	TCONS_00023376	19290	Pura	transcript	2.15409	0.008678	7.9555	0.00096005	0.0297987
NR_030738.1	69221	2410006H16Rik	lncRNA	5.19583	5.60683	-0.109831	0.00176592	0.0387359	mmu-miR-214-3p	866.854	544.158	0.66229	0.00013468	0.0046466	TCONS_00017162	11430	Acox1	transcript	12.213	0.001165	13.3558	0.000790298	0.0276354
NR_030738.1	69221	2410006H16Rik	lncRNA	5.19583	5.60683	-0.109831	0.00176592	0.0387359	mmu-miR-214-3p	866.854	544.158	0.66229	0.00013468	0.0046466	XM_006515925.4	26932	Ppp2r5e	transcript	1.17794	0.258766	2.18654	0.000952025	0.0296311
NR_030738.1	69221	2410006H16Rik	lncRNA	5.19583	5.60683	-0.109831	0.00176592	0.0387359	mmu-miR-214-3p	866.854	544.158	0.66229	0.00013468	0.0046466	NM_029573.2	67834	Idh3a	transcript	102.21	117.679	-0.203314	0.000977083	0.0298464
NR_030738.1	69221	2410006H16Rik	lncRNA	5.19583	5.60683	-0.109831	0.00176592	0.0387359	mmu-miR-214-3p	866.854	544.158	0.66229	0.00013468	0.0046466	NM_018743.4	102247	Gpat4	transcript	7.76624	6.97285	0.155467	0.00132739	0.0345061
NR_030738.1	69221	2410006H16Rik	lncRNA	5.19583	5.60683	-0.109831	0.00176592	0.0387359	mmu-miR-214-3p	866.854	544.158	0.66229	0.00013468	0.0046466	NM_027558.1	70804	Pgrmc2	transcript	13.5548	8.47909	0.676825	0.000359363	0.0276354
NR_030738.1	69221	2410006H16Rik	lncRNA	5.19583	5.60683	-0.109831	0.00176592	0.0387359	mmu-miR-214-3p	866.854	544.158	0.66229	0.00013468	0.0046466	NM_008681.2	17988	Ndrg1	transcript	13.4879	7.27813	0.890022	0.00249471	0.0476436
NR_028422.1	100303644	C130080G10Rik	lncRNA	0.891445	34.4444	-5.27198	0.000110105	0.0276354	mmu-miR-214-3p	866.854	544.158	0.66229	0.00013468	0.0046466	XM_006519358.3	65107	Lrp10	transcript	2.10967	0.25084	3.07218	0.00255949	0.0482407
NR_028422.1	100303644	C130080G10Rik	lncRNA	0.891445	34.4444	-5.27198	0.000110105	0.0276354	mmu-miR-214-3p	866.854	544.158	0.66229	0.00013468	0.0046466	TCONS_00004132	229663	Csde1	transcript	48.2189	63.0905	-0.387826	0.0012973	0.0342571
NR_028422.1	100303644	C130080G10Rik	lncRNA	0.891445	34.4444	-5.27198	0.000110105	0.0276354	mmu-miR-214-3p	866.854	544.158	0.66229	0.00013468	0.0046466	NM_007395.4	11479	Acvr1b	transcript	6.46432	3.77857	0.774661	0.000388991	0.0276354
NR_028422.1	100303644	C130080G10Rik	lncRNA	0.891445	34.4444	-5.27198	0.000110105	0.0276354	mmu-miR-214-3p	866.854	544.158	0.66229	0.00013468	0.0046466	TCONS_00022043	20656	Sod2	transcript	6.07359	0.19545	4.95768	0.0002461	0.0276354
NR_028422.1	100303644	C130080G10Rik	lncRNA	0.891445	34.4444	-5.27198	0.000110105	0.0276354	mmu-miR-214-3p	866.854	544.158	0.66229	0.00013468	0.0046466	NM_001013390.3	399548	Scn4b	transcript	2.15251	16.2847	-2.91942	0.00111032	0.0316263
NR_028422.1	100303644	C130080G10Rik	lncRNA	0.891445	34.4444	-5.27198	0.000110105	0.0276354	mmu-miR-214-3p	866.854	544.158	0.66229	0.00013468	0.0046466	XM_006503677.4	11518	Add1	transcript	1.28784	0.00563833	7.83547	0.000849239	0.028103
NR_028422.1	100303644	C130080G10Rik	lncRNA	0.891445	34.4444	-5.27198	0.000110105	0.0276354	mmu-miR-214-3p	866.854	544.158	0.66229	0.00013468	0.0046466	NM_001077184.1	12215	Bsg	transcript	229.288	397.283	-0.793008	0.0014193	0.0355126
NR_028422.1	100303644	C130080G10Rik	lncRNA	0.891445	34.4444	-5.27198	0.000110105	0.0276354	mmu-miR-214-3p	866.854	544.158	0.66229	0.00013468	0.0046466	XM_006507175.4	101706	Numa1	transcript	2.05864	1.25498	0.714031	0.00217807	0.0438821
NR_028422.1	100303644	C130080G10Rik	lncRNA	0.891445	34.4444	-5.27198	0.000110105	0.0276354	mmu-miR-214-3p	866.854	544.158	0.66229	0.00013468	0.0046466	XM_006538665.4	192185	Nadk	transcript	0.972007	0.0104583	6.53824	0.00196035	0.0413468
NR_028422.1	100303644	C130080G10Rik	lncRNA	0.891445	34.4444	-5.27198	0.000110105	0.0276354	mmu-miR-214-3p	866.854	544.158	0.66229	0.00013468	0.0046466	NM_026524.4	68041	Mid1ip1	transcript	37.9267	30.3802	0.320079	0.000987289	0.0299274
NR_028422.1	100303644	C130080G10Rik	lncRNA	0.891445	34.4444	-5.27198	0.000110105	0.0276354	mmu-miR-214-3p	866.854	544.158	0.66229	0.00013468	0.0046466	XM_036157952.1	12908	Crat	transcript	3.05654	0	Inf	5.87e-05	0.0211184
NR_028422.1	100303644	C130080G10Rik	lncRNA	0.891445	34.4444	-5.27198	0.000110105	0.0276354	mmu-miR-214-3p	866.854	544.158	0.66229	0.00013468	0.0046466	NM_011293.2	20022	Polr2j	transcript	13.2814	15.4381	-0.217088	0.000690938	0.0276354
NR_028422.1	100303644	C130080G10Rik	lncRNA	0.891445	34.4444	-5.27198	0.000110105	0.0276354	mmu-miR-214-3p	866.854	544.158	0.66229	0.00013468	0.0046466	NM_013799.3	11907	Ate1	transcript	1.05172	0.261099	2.01008	0.0019568	0.0413468
NR_028422.1	100303644	C130080G10Rik	lncRNA	0.891445	34.4444	-5.27198	0.000110105	0.0276354	mmu-miR-214-3p	866.854	544.158	0.66229	0.00013468	0.0046466	NM_022032.4	64058	Perp	transcript	119.731	36.8542	1.6999	0.00103486	0.0304533
NR_028422.1	100303644	C130080G10Rik	lncRNA	0.891445	34.4444	-5.27198	0.000110105	0.0276354	mmu-miR-214-3p	866.854	544.158	0.66229	0.00013468	0.0046466	NM_130449.2	140792	Colec12	transcript	3.99678	3.31964	0.26781	0.00250276	0.0477182
NR_028422.1	100303644	C130080G10Rik	lncRNA	0.891445	34.4444	-5.27198	0.000110105	0.0276354	mmu-miR-214-3p	866.854	544.158	0.66229	0.00013468	0.0046466	NM_020332.4	11732	Ank	transcript	34.408	47.7049	-0.471394	9.3e-06	0.0155632
NR_028422.1	100303644	C130080G10Rik	lncRNA	0.891445	34.4444	-5.27198	0.000110105	0.0276354	mmu-miR-214-3p	866.854	544.158	0.66229	0.00013468	0.0046466	NM_146243.2	66713	Actr2	transcript	29.0525	22.8911	0.343875	0.00149481	0.0362404
NR_028422.1	100303644	C130080G10Rik	lncRNA	0.891445	34.4444	-5.27198	0.000110105	0.0276354	mmu-miR-214-3p	866.854	544.158	0.66229	0.00013468	0.0046466	NM_145605.2	234825	Klhdc4	transcript	1.15389	3.19303	-1.46842	0.000484263	0.0276354
NR_028422.1	100303644	C130080G10Rik	lncRNA	0.891445	34.4444	-5.27198	0.000110105	0.0276354	mmu-miR-214-3p	866.854	544.158	0.66229	0.00013468	0.0046466	NM_009128.2	20250	Scd2	transcript	5.03621	2.28079	1.14281	0.00036858	0.0276354
NR_028422.1	100303644	C130080G10Rik	lncRNA	0.891445	34.4444	-5.27198	0.000110105	0.0276354	mmu-miR-214-3p	866.854	544.158	0.66229	0.00013468	0.0046466	NM_146169.2	232164	Paip2b	transcript	8.94612	8.43108	0.0855459	0.00119144	0.0329033
NR_028422.1	100303644	C130080G10Rik	lncRNA	0.891445	34.4444	-5.27198	0.000110105	0.0276354	mmu-miR-214-3p	866.854	544.158	0.66229	0.00013468	0.0046466	TCONS_00025423	66158	Rtl8a	transcript	1.29636	0	Inf	0.000820671	0.0276354
NR_028422.1	100303644	C130080G10Rik	lncRNA	0.891445	34.4444	-5.27198	0.000110105	0.0276354	mmu-miR-214-3p	866.854	544.158	0.66229	0.00013468	0.0046466	NM_007616.4	12389	Cav1	transcript	43.4254	41.8983	0.0516465	0.000217852	0.0276354
NR_028422.1	100303644	C130080G10Rik	lncRNA	0.891445	34.4444	-5.27198	0.000110105	0.0276354	mmu-miR-214-3p	866.854	544.158	0.66229	0.00013468	0.0046466	XM_036157306.1	217463	Snx13	transcript	1.9793	0	Inf	0.000820671	0.0276354
NR_028422.1	100303644	C130080G10Rik	lncRNA	0.891445	34.4444	-5.27198	0.000110105	0.0276354	mmu-miR-214-3p	866.854	544.158	0.66229	0.00013468	0.0046466	XM_036162479.1	66691	Gapvd1	transcript	0.923883	0.00617833	7.22435	0.00246229	0.0472596
NR_028422.1	100303644	C130080G10Rik	lncRNA	0.891445	34.4444	-5.27198	0.000110105	0.0276354	mmu-miR-214-3p	866.854	544.158	0.66229	0.00013468	0.0046466	NM_026919.1	69038	Tmem258	transcript	30.5924	45.4779	-0.571991	0.00175494	0.0386422
NR_028422.1	100303644	C130080G10Rik	lncRNA	0.891445	34.4444	-5.27198	0.000110105	0.0276354	mmu-miR-214-3p	866.854	544.158	0.66229	0.00013468	0.0046466	TCONS_00019782	50527	Ero1a	transcript	1.12978	0	Inf	0.000820671	0.0276354
NR_028422.1	100303644	C130080G10Rik	lncRNA	0.891445	34.4444	-5.27198	0.000110105	0.0276354	mmu-miR-214-3p	866.854	544.158	0.66229	0.00013468	0.0046466	TCONS_00000691	320404	Itpkb	transcript	2.74831	0	Inf	0.00022582	0.0276354
NR_028422.1	100303644	C130080G10Rik	lncRNA	0.891445	34.4444	-5.27198	0.000110105	0.0276354	mmu-miR-214-3p	866.854	544.158	0.66229	0.00013468	0.0046466	XM_011246234.2	106522	Pkdcc	transcript	0.975937	0	Inf	0.000820671	0.0276354
NR_028422.1	100303644	C130080G10Rik	lncRNA	0.891445	34.4444	-5.27198	0.000110105	0.0276354	mmu-miR-214-3p	866.854	544.158	0.66229	0.00013468	0.0046466	XM_006517134.5	18193	Nsd1	transcript	1.9852	0.448937	2.1447	0.00060106	0.0276354
NR_028422.1	100303644	C130080G10Rik	lncRNA	0.891445	34.4444	-5.27198	0.000110105	0.0276354	mmu-miR-214-3p	866.854	544.158	0.66229	0.00013468	0.0046466	NM_010633.4	16589	Uhmk1	transcript	7.61792	5.62359	0.437905	0.00058092	0.0276354
NR_028422.1	100303644	C130080G10Rik	lncRNA	0.891445	34.4444	-5.27198	0.000110105	0.0276354	mmu-miR-214-3p	866.854	544.158	0.66229	0.00013468	0.0046466	NM_016709.2	11992	Auh	transcript	23.1108	25.9264	-0.165855	0.00124159	0.0335637
NR_028422.1	100303644	C130080G10Rik	lncRNA	0.891445	34.4444	-5.27198	0.000110105	0.0276354	mmu-miR-214-3p	866.854	544.158	0.66229	0.00013468	0.0046466	XM_030246370.1	72729	Cdc42se2	transcript	1.75393	0.133176	3.71919	3e-05	0.0155632
NR_028422.1	100303644	C130080G10Rik	lncRNA	0.891445	34.4444	-5.27198	0.000110105	0.0276354	mmu-miR-214-3p	866.854	544.158	0.66229	0.00013468	0.0046466	XM_006504490.4	66711	Sbds	transcript	5.04204	0.162342	4.9569	0.000582299	0.0276354
NR_028422.1	100303644	C130080G10Rik	lncRNA	0.891445	34.4444	-5.27198	0.000110105	0.0276354	mmu-miR-214-3p	866.854	544.158	0.66229	0.00013468	0.0046466	NM_027859.3	71673	Rnf215	transcript	2.26533	2.64791	-0.22513	0.00109052	0.0314747
NR_028422.1	100303644	C130080G10Rik	lncRNA	0.891445	34.4444	-5.27198	0.000110105	0.0276354	mmu-miR-214-3p	866.854	544.158	0.66229	0.00013468	0.0046466	TCONS_00017675	68519	Eml1	transcript	11.0496	10.9045	0.0190772	0.00239943	0.0465183
NR_028422.1	100303644	C130080G10Rik	lncRNA	0.891445	34.4444	-5.27198	0.000110105	0.0276354	mmu-miR-214-3p	866.854	544.158	0.66229	0.00013468	0.0046466	NM_177411.4	19344	Rab5b	transcript	15.3906	17.862	-0.214852	0.000321654	0.0276354
NR_028422.1	100303644	C130080G10Rik	lncRNA	0.891445	34.4444	-5.27198	0.000110105	0.0276354	mmu-miR-214-3p	866.854	544.158	0.66229	0.00013468	0.0046466	TCONS_00025632	14605	Tsc22d3	transcript	6.76223	7.56572	-0.161979	0.00193513	0.0411922
NR_028422.1	100303644	C130080G10Rik	lncRNA	0.891445	34.4444	-5.27198	0.000110105	0.0276354	mmu-miR-214-3p	866.854	544.158	0.66229	0.00013468	0.0046466	XM_030248555.2	239555	Mief1	transcript	1.40417	0.071697	4.29166	0.00216897	0.0438208
NR_028422.1	100303644	C130080G10Rik	lncRNA	0.891445	34.4444	-5.27198	0.000110105	0.0276354	mmu-miR-214-3p	866.854	544.158	0.66229	0.00013468	0.0046466	TCONS_00011889	16337	Insr	transcript	3.80413	0	Inf	3.51e-05	0.0155632
NR_028422.1	100303644	C130080G10Rik	lncRNA	0.891445	34.4444	-5.27198	0.000110105	0.0276354	mmu-miR-214-3p	866.854	544.158	0.66229	0.00013468	0.0046466	TCONS_00023739	76594	Dnajc18	transcript	1.93372	0	Inf	0.000820671	0.0276354
NR_028422.1	100303644	C130080G10Rik	lncRNA	0.891445	34.4444	-5.27198	0.000110105	0.0276354	mmu-miR-214-3p	866.854	544.158	0.66229	0.00013468	0.0046466	NM_145929.2	106039	Gga1	transcript	10.8709	8.79062	0.306438	0.0015586	0.0372453
NR_028422.1	100303644	C130080G10Rik	lncRNA	0.891445	34.4444	-5.27198	0.000110105	0.0276354	mmu-miR-214-3p	866.854	544.158	0.66229	0.00013468	0.0046466	TCONS_00001258	116847	Prelp	transcript	1.45639	0	Inf	0.000820671	0.0276354
NR_028422.1	100303644	C130080G10Rik	lncRNA	0.891445	34.4444	-5.27198	0.000110105	0.0276354	mmu-miR-214-3p	866.854	544.158	0.66229	0.00013468	0.0046466	NM_019774.5	56399	Akap8	transcript	4.41498	4.61893	-0.0651514	0.0020109	0.0420282
NR_028422.1	100303644	C130080G10Rik	lncRNA	0.891445	34.4444	-5.27198	0.000110105	0.0276354	mmu-miR-214-3p	866.854	544.158	0.66229	0.00013468	0.0046466	NM_001017429.2	12856	Cox17	transcript	100.01	129.573	-0.373622	0.00264968	0.0491363
NR_028422.1	100303644	C130080G10Rik	lncRNA	0.891445	34.4444	-5.27198	0.000110105	0.0276354	mmu-miR-214-3p	866.854	544.158	0.66229	0.00013468	0.0046466	XM_011245351.4	223455	Marchf6	transcript	4.21198	0.316444	3.73447	0.00123918	0.0335637
NR_028422.1	100303644	C130080G10Rik	lncRNA	0.891445	34.4444	-5.27198	0.000110105	0.0276354	mmu-miR-214-3p	866.854	544.158	0.66229	0.00013468	0.0046466	NM_019764.2	56332	Amotl2	transcript	14.284	9.48432	0.590781	0.000290535	0.0276354
NR_028422.1	100303644	C130080G10Rik	lncRNA	0.891445	34.4444	-5.27198	0.000110105	0.0276354	mmu-miR-214-3p	866.854	544.158	0.66229	0.00013468	0.0046466	NM_133831.3	68077	Nop53	transcript	25.343	23.991	0.0790944	0.000321251	0.0276354
NR_028422.1	100303644	C130080G10Rik	lncRNA	0.891445	34.4444	-5.27198	0.000110105	0.0276354	mmu-miR-214-3p	866.854	544.158	0.66229	0.00013468	0.0046466	NM_009776.3	12258	Serping1	transcript	16.347	19.022	-0.218642	0.000205943	0.0276354
NR_028422.1	100303644	C130080G10Rik	lncRNA	0.891445	34.4444	-5.27198	0.000110105	0.0276354	mmu-miR-214-3p	866.854	544.158	0.66229	0.00013468	0.0046466	NM_011838.4	23936	Lynx1	transcript	25.7672	40.3626	-0.647487	0.000722116	0.0276354
NR_028422.1	100303644	C130080G10Rik	lncRNA	0.891445	34.4444	-5.27198	0.000110105	0.0276354	mmu-miR-214-3p	866.854	544.158	0.66229	0.00013468	0.0046466	NM_011435.3	20657	Sod3	transcript	6.60321	9.08811	-0.460813	0.00117059	0.0326432
NR_028422.1	100303644	C130080G10Rik	lncRNA	0.891445	34.4444	-5.27198	0.000110105	0.0276354	mmu-miR-214-3p	866.854	544.158	0.66229	0.00013468	0.0046466	XM_030250546.2	56386	B4galt6	transcript	1.70533	0.00590867	8.17301	0.00086113	0.0281727
NR_028422.1	100303644	C130080G10Rik	lncRNA	0.891445	34.4444	-5.27198	0.000110105	0.0276354	mmu-miR-214-3p	866.854	544.158	0.66229	0.00013468	0.0046466	XM_030243724.1	80914	Uck2	transcript	2.38203	0.0179517	7.05193	0.000395132	0.0276354
NR_028422.1	100303644	C130080G10Rik	lncRNA	0.891445	34.4444	-5.27198	0.000110105	0.0276354	mmu-miR-214-3p	866.854	544.158	0.66229	0.00013468	0.0046466	NM_008828.3	18655	Pgk1	transcript	83.217	79.3525	0.068602	0.00229255	0.0452466
NR_028422.1	100303644	C130080G10Rik	lncRNA	0.891445	34.4444	-5.27198	0.000110105	0.0276354	mmu-miR-214-3p	866.854	544.158	0.66229	0.00013468	0.0046466	XM_036161354.1	228602	4930402H24Rik	transcript	1.31164	0.00155	9.72489	8.14e-05	0.0253471
NR_028422.1	100303644	C130080G10Rik	lncRNA	0.891445	34.4444	-5.27198	0.000110105	0.0276354	mmu-miR-214-3p	866.854	544.158	0.66229	0.00013468	0.0046466	NM_029182.1	75141	Rasd2	transcript	5.28095	1.10421	2.25778	0.00103307	0.0304533
NR_028422.1	100303644	C130080G10Rik	lncRNA	0.891445	34.4444	-5.27198	0.000110105	0.0276354	mmu-miR-214-3p	866.854	544.158	0.66229	0.00013468	0.0046466	NM_173735.3	217732	Cipc	transcript	2.22002	0.086604	4.68	0.000543181	0.0276354
NR_028422.1	100303644	C130080G10Rik	lncRNA	0.891445	34.4444	-5.27198	0.000110105	0.0276354	mmu-miR-214-3p	866.854	544.158	0.66229	0.00013468	0.0046466	NM_010385.2	14976	Pfdn6	transcript	13.2552	17.8863	-0.4323	0.00108699	0.0314517
NR_028422.1	100303644	C130080G10Rik	lncRNA	0.891445	34.4444	-5.27198	0.000110105	0.0276354	mmu-miR-214-3p	866.854	544.158	0.66229	0.00013468	0.0046466	NM_001161420.1	22359	Vldlr	transcript	2.8505	7.64704	-1.42369	0.000891982	0.0287892
NR_028422.1	100303644	C130080G10Rik	lncRNA	0.891445	34.4444	-5.27198	0.000110105	0.0276354	mmu-miR-214-3p	866.854	544.158	0.66229	0.00013468	0.0046466	NM_008688.3	18029	Nfic	transcript	4.59623	14.0914	-1.61629	0.00200236	0.0419257
NR_028422.1	100303644	C130080G10Rik	lncRNA	0.891445	34.4444	-5.27198	0.000110105	0.0276354	mmu-miR-214-3p	866.854	544.158	0.66229	0.00013468	0.0046466	NM_008338.4	15980	Ifngr2	transcript	40.1831	60.2437	-0.584221	7.98e-05	0.0253471
NR_028422.1	100303644	C130080G10Rik	lncRNA	0.891445	34.4444	-5.27198	0.000110105	0.0276354	mmu-miR-214-3p	866.854	544.158	0.66229	0.00013468	0.0046466	NM_001115132.2	52683	Ncaph2	transcript	3.1926	0.540685	2.56187	0.00108613	0.0314517
NR_028422.1	100303644	C130080G10Rik	lncRNA	0.891445	34.4444	-5.27198	0.000110105	0.0276354	mmu-miR-214-3p	866.854	544.158	0.66229	0.00013468	0.0046466	NM_021284.6	16653	Kras	transcript	6.68577	7.24422	-0.115735	0.000780807	0.0276354
NR_028422.1	100303644	C130080G10Rik	lncRNA	0.891445	34.4444	-5.27198	0.000110105	0.0276354	mmu-miR-214-3p	866.854	544.158	0.66229	0.00013468	0.0046466	NM_025407.2	22273	Uqcrc1	transcript	305.19	377.485	-0.306711	0.000478795	0.0276354
NR_028422.1	100303644	C130080G10Rik	lncRNA	0.891445	34.4444	-5.27198	0.000110105	0.0276354	mmu-miR-214-3p	866.854	544.158	0.66229	0.00013468	0.0046466	XM_030245515.2	12808	Cobl	transcript	1.22489	0.014136	6.43713	0.000731975	0.0276354
NR_028422.1	100303644	C130080G10Rik	lncRNA	0.891445	34.4444	-5.27198	0.000110105	0.0276354	mmu-miR-214-3p	866.854	544.158	0.66229	0.00013468	0.0046466	NM_175236.5	76187	Adhfe1	transcript	5.22125	5.88058	-0.171562	0.00131045	0.0342571
NR_028422.1	100303644	C130080G10Rik	lncRNA	0.891445	34.4444	-5.27198	0.000110105	0.0276354	mmu-miR-214-3p	866.854	544.158	0.66229	0.00013468	0.0046466	NM_197990.3	69399	1700025G04Rik	transcript	6.52172	2.62541	1.31271	0.000479421	0.0276354
NR_028422.1	100303644	C130080G10Rik	lncRNA	0.891445	34.4444	-5.27198	0.000110105	0.0276354	mmu-miR-214-3p	866.854	544.158	0.66229	0.00013468	0.0046466	NM_133664.3	16763	Lad1	transcript	2.17237	0.171618	3.662	0.000206847	0.0276354
NR_028422.1	100303644	C130080G10Rik	lncRNA	0.891445	34.4444	-5.27198	0.000110105	0.0276354	mmu-miR-214-3p	866.854	544.158	0.66229	0.00013468	0.0046466	NM_198013.3	103841	Cuedc1	transcript	9.33807	8.4224	0.148893	0.0015783	0.0372453
NR_028422.1	100303644	C130080G10Rik	lncRNA	0.891445	34.4444	-5.27198	0.000110105	0.0276354	mmu-miR-214-3p	866.854	544.158	0.66229	0.00013468	0.0046466	NM_001110844.1	12293	Cacna2d1	transcript	0.631283	4.45131	-2.81787	0.000493731	0.0276354
NR_028422.1	100303644	C130080G10Rik	lncRNA	0.891445	34.4444	-5.27198	0.000110105	0.0276354	mmu-miR-214-3p	866.854	544.158	0.66229	0.00013468	0.0046466	NM_146193.2	83962	Btbd1	transcript	36.2804	34.6035	0.0682754	0.00168654	0.0382088
NR_028422.1	100303644	C130080G10Rik	lncRNA	0.891445	34.4444	-5.27198	0.000110105	0.0276354	mmu-miR-214-3p	866.854	544.158	0.66229	0.00013468	0.0046466	NM_001355651.1	74182	Gpcpd1	transcript	1.98661	0.186929	3.40975	0.00197354	0.041549
NR_028422.1	100303644	C130080G10Rik	lncRNA	0.891445	34.4444	-5.27198	0.000110105	0.0276354	mmu-miR-214-3p	866.854	544.158	0.66229	0.00013468	0.0046466	TCONS_00022742	30957	Mapk8ip3	transcript	0.033413	2.79614	-6.38688	0.000274522	0.0276354
NR_028422.1	100303644	C130080G10Rik	lncRNA	0.891445	34.4444	-5.27198	0.000110105	0.0276354	mmu-miR-214-3p	866.854	544.158	0.66229	0.00013468	0.0046466	NM_025828.3	66890	Lman2	transcript	13.183	13.5281	-0.0372866	0.00183952	0.0400109
NR_028422.1	100303644	C130080G10Rik	lncRNA	0.891445	34.4444	-5.27198	0.000110105	0.0276354	mmu-miR-214-3p	866.854	544.158	0.66229	0.00013468	0.0046466	NM_019694.2	56384	Letm1	transcript	5.73717	11.2145	-0.966953	0.000238425	0.0276354
NR_028422.1	100303644	C130080G10Rik	lncRNA	0.891445	34.4444	-5.27198	0.000110105	0.0276354	mmu-miR-214-3p	866.854	544.158	0.66229	0.00013468	0.0046466	NM_011908.2	24109	Ubl3	transcript	7.77652	18.8816	-1.27979	2.2e-05	0.0155632
NR_028422.1	100303644	C130080G10Rik	lncRNA	0.891445	34.4444	-5.27198	0.000110105	0.0276354	mmu-miR-214-3p	866.854	544.158	0.66229	0.00013468	0.0046466	NM_001164191.1	17772	Mtm1	transcript	4.86962	4.57993	0.0884856	0.00244339	0.0472115
NR_028422.1	100303644	C130080G10Rik	lncRNA	0.891445	34.4444	-5.27198	0.000110105	0.0276354	mmu-miR-214-3p	866.854	544.158	0.66229	0.00013468	0.0046466	NM_001289702.1	83679	Pde4dip	transcript	26.0448	32.6548	-0.326299	0.00157065	0.0372453
NR_028422.1	100303644	C130080G10Rik	lncRNA	0.891445	34.4444	-5.27198	0.000110105	0.0276354	mmu-miR-214-3p	866.854	544.158	0.66229	0.00013468	0.0046466	XM_036161998.1	241694	Ralgapa2	transcript	4.94291	0.169671	4.86455	0.000222044	0.0276354
NR_028422.1	100303644	C130080G10Rik	lncRNA	0.891445	34.4444	-5.27198	0.000110105	0.0276354	mmu-miR-214-3p	866.854	544.158	0.66229	0.00013468	0.0046466	XM_036156454.1	19345	Rab5c	transcript	1.04576	0	Inf	0.000756013	0.0276354
NR_028422.1	100303644	C130080G10Rik	lncRNA	0.891445	34.4444	-5.27198	0.000110105	0.0276354	mmu-miR-214-3p	866.854	544.158	0.66229	0.00013468	0.0046466	XM_036155419.1	84585	Rnf123	transcript	0.992394	0.075402	3.71824	0.00019691	0.0276354
NR_028422.1	100303644	C130080G10Rik	lncRNA	0.891445	34.4444	-5.27198	0.000110105	0.0276354	mmu-miR-214-3p	866.854	544.158	0.66229	0.00013468	0.0046466	NM_028771.3	52132	Ccdc97	transcript	0.353089	5.23544	-3.89021	0.000248656	0.0276354
NR_028422.1	100303644	C130080G10Rik	lncRNA	0.891445	34.4444	-5.27198	0.000110105	0.0276354	mmu-miR-214-3p	866.854	544.158	0.66229	0.00013468	0.0046466	TCONS_00007852	59008	Anapc5	transcript	3.69736	0	Inf	0.000820671	0.0276354
NR_028422.1	100303644	C130080G10Rik	lncRNA	0.891445	34.4444	-5.27198	0.000110105	0.0276354	mmu-miR-214-3p	866.854	544.158	0.66229	0.00013468	0.0046466	TCONS_00020139	16880	Lifr	transcript	1.30271	0	Inf	0.000820671	0.0276354
NR_028422.1	100303644	C130080G10Rik	lncRNA	0.891445	34.4444	-5.27198	0.000110105	0.0276354	mmu-miR-214-3p	866.854	544.158	0.66229	0.00013468	0.0046466	NM_178253.5	271005	Klhdc1	transcript	4.29811	8.4043	-0.967424	0.000211255	0.0276354
NR_028422.1	100303644	C130080G10Rik	lncRNA	0.891445	34.4444	-5.27198	0.000110105	0.0276354	mmu-miR-214-3p	866.854	544.158	0.66229	0.00013468	0.0046466	NM_175523.5	243382	Ppm1k	transcript	41.3824	25.3879	0.704875	0.000348613	0.0276354
NR_028422.1	100303644	C130080G10Rik	lncRNA	0.891445	34.4444	-5.27198	0.000110105	0.0276354	mmu-miR-214-3p	866.854	544.158	0.66229	0.00013468	0.0046466	NM_026275.4	67615	Ube2r2	transcript	5.99431	0.341337	4.13433	0.000853945	0.0281337
NR_028422.1	100303644	C130080G10Rik	lncRNA	0.891445	34.4444	-5.27198	0.000110105	0.0276354	mmu-miR-214-3p	866.854	544.158	0.66229	0.00013468	0.0046466	NM_007798.3	13030	Ctsb	transcript	44.5757	45.1527	-0.018554	7.35e-05	0.0248953
NR_028422.1	100303644	C130080G10Rik	lncRNA	0.891445	34.4444	-5.27198	0.000110105	0.0276354	mmu-miR-214-3p	866.854	544.158	0.66229	0.00013468	0.0046466	XM_006533995.4	67473	Slc47a1	transcript	1.20768	0.0603787	4.32205	0.000196345	0.0276354
NR_028422.1	100303644	C130080G10Rik	lncRNA	0.891445	34.4444	-5.27198	0.000110105	0.0276354	mmu-miR-214-3p	866.854	544.158	0.66229	0.00013468	0.0046466	NM_008258.2	15374	Jpt1	transcript	29.7754	15.9326	0.90214	0.00268557	0.0494042
NR_028422.1	100303644	C130080G10Rik	lncRNA	0.891445	34.4444	-5.27198	0.000110105	0.0276354	mmu-miR-214-3p	866.854	544.158	0.66229	0.00013468	0.0046466	XM_006516544.4	140580	Elmo1	transcript	0.964251	0	Inf	0.000820671	0.0276354
NR_028422.1	100303644	C130080G10Rik	lncRNA	0.891445	34.4444	-5.27198	0.000110105	0.0276354	mmu-miR-214-3p	866.854	544.158	0.66229	0.00013468	0.0046466	XM_011239446.4	228026	Pdk1	transcript	3.2763	0	Inf	0.000820671	0.0276354
NR_028422.1	100303644	C130080G10Rik	lncRNA	0.891445	34.4444	-5.27198	0.000110105	0.0276354	mmu-miR-214-3p	866.854	544.158	0.66229	0.00013468	0.0046466	TCONS_00002822	67512	Agpat2	transcript	1.95082	0	Inf	0.000820671	0.0276354
NR_028422.1	100303644	C130080G10Rik	lncRNA	0.891445	34.4444	-5.27198	0.000110105	0.0276354	mmu-miR-214-3p	866.854	544.158	0.66229	0.00013468	0.0046466	NM_175398.4	109050	Inka2	transcript	2.56575	7.08752	-1.4659	0.00255544	0.0482407
NR_028422.1	100303644	C130080G10Rik	lncRNA	0.891445	34.4444	-5.27198	0.000110105	0.0276354	mmu-miR-214-3p	866.854	544.158	0.66229	0.00013468	0.0046466	XM_030249575.2	18607	Pdpk1	transcript	3.59523	0	Inf	2.05e-05	0.0155632
NR_028422.1	100303644	C130080G10Rik	lncRNA	0.891445	34.4444	-5.27198	0.000110105	0.0276354	mmu-miR-214-3p	866.854	544.158	0.66229	0.00013468	0.0046466	NM_001288613.1	245860	Atg9a	transcript	2.10893	0.14069	3.90593	0.000401703	0.0276354
NR_028422.1	100303644	C130080G10Rik	lncRNA	0.891445	34.4444	-5.27198	0.000110105	0.0276354	mmu-miR-214-3p	866.854	544.158	0.66229	0.00013468	0.0046466	TCONS_00015185	14533	Bloc1s1	transcript	4.31854	0	Inf	0.000820671	0.0276354
NR_028422.1	100303644	C130080G10Rik	lncRNA	0.891445	34.4444	-5.27198	0.000110105	0.0276354	mmu-miR-214-3p	866.854	544.158	0.66229	0.00013468	0.0046466	XM_017321605.3	27418	Mkln1	transcript	1.57045	0.0165473	6.56843	0.00103662	0.0304533
NR_028422.1	100303644	C130080G10Rik	lncRNA	0.891445	34.4444	-5.27198	0.000110105	0.0276354	mmu-miR-214-3p	866.854	544.158	0.66229	0.00013468	0.0046466	NM_001310464.1	19699	Reln	transcript	1.91056	0	Inf	9.66e-05	0.0264941
NR_028422.1	100303644	C130080G10Rik	lncRNA	0.891445	34.4444	-5.27198	0.000110105	0.0276354	mmu-miR-214-3p	866.854	544.158	0.66229	0.00013468	0.0046466	XM_036162790.1	19130	Prox1	transcript	1.35014	0.000200667	12.716	2.04e-05	0.0155632
NR_028422.1	100303644	C130080G10Rik	lncRNA	0.891445	34.4444	-5.27198	0.000110105	0.0276354	mmu-miR-214-3p	866.854	544.158	0.66229	0.00013468	0.0046466	XM_036158471.1	15460	Hr	transcript	0	2.40576	#NAME?	0.0021495	0.0436572
NR_028422.1	100303644	C130080G10Rik	lncRNA	0.891445	34.4444	-5.27198	0.000110105	0.0276354	mmu-miR-214-3p	866.854	544.158	0.66229	0.00013468	0.0046466	XM_006517452.5	76577	Faf2	transcript	0.845375	0	Inf	0.000820671	0.0276354
NR_028422.1	100303644	C130080G10Rik	lncRNA	0.891445	34.4444	-5.27198	0.000110105	0.0276354	mmu-miR-214-3p	866.854	544.158	0.66229	0.00013468	0.0046466	NM_177673.2	230967	Cep104	transcript	3.10235	2.01391	0.623361	0.000626734	0.0276354
NR_028422.1	100303644	C130080G10Rik	lncRNA	0.891445	34.4444	-5.27198	0.000110105	0.0276354	mmu-miR-214-3p	866.854	544.158	0.66229	0.00013468	0.0046466	TCONS_00002486	68295	Aar2	transcript	1.18122	0	Inf	0.000820671	0.0276354
NR_028422.1	100303644	C130080G10Rik	lncRNA	0.891445	34.4444	-5.27198	0.000110105	0.0276354	mmu-miR-214-3p	866.854	544.158	0.66229	0.00013468	0.0046466	TCONS_00015789	107476	Acaca	transcript	0.855672	0.031853	4.74756	0.0012857	0.0341943
NR_028422.1	100303644	C130080G10Rik	lncRNA	0.891445	34.4444	-5.27198	0.000110105	0.0276354	mmu-miR-214-3p	866.854	544.158	0.66229	0.00013468	0.0046466	NM_153794.4	108654	Fam210a	transcript	5.80425	4.32633	0.423966	0.000651079	0.0276354
NR_028422.1	100303644	C130080G10Rik	lncRNA	0.891445	34.4444	-5.27198	0.000110105	0.0276354	mmu-miR-214-3p	866.854	544.158	0.66229	0.00013468	0.0046466	TCONS_00024433	73713	Rbm20	transcript	1.35106	0	Inf	0.000820671	0.0276354
NR_028422.1	100303644	C130080G10Rik	lncRNA	0.891445	34.4444	-5.27198	0.000110105	0.0276354	mmu-miR-214-3p	866.854	544.158	0.66229	0.00013468	0.0046466	NM_009088.3	20019	Polr1a	transcript	5.17423	7.65806	-0.565635	0.000892474	0.0287892
NR_028422.1	100303644	C130080G10Rik	lncRNA	0.891445	34.4444	-5.27198	0.000110105	0.0276354	mmu-miR-214-3p	866.854	544.158	0.66229	0.00013468	0.0046466	NM_001163379.1	55979	Agpat1	transcript	14.6579	11.2463	0.382229	0.000825619	0.0277196
NR_028422.1	100303644	C130080G10Rik	lncRNA	0.891445	34.4444	-5.27198	0.000110105	0.0276354	mmu-miR-214-3p	866.854	544.158	0.66229	0.00013468	0.0046466	NM_145447.2	217721	Flvcr2	transcript	2.72949	0.849176	1.6845	0.00015539	0.0276354
NR_028422.1	100303644	C130080G10Rik	lncRNA	0.891445	34.4444	-5.27198	0.000110105	0.0276354	mmu-miR-214-3p	866.854	544.158	0.66229	0.00013468	0.0046466	NM_001359505.1	77521	Mtus2	transcript	30.9488	21.1013	0.552555	0.000558842	0.0276354
NR_028422.1	100303644	C130080G10Rik	lncRNA	0.891445	34.4444	-5.27198	0.000110105	0.0276354	mmu-miR-214-3p	866.854	544.158	0.66229	0.00013468	0.0046466	XM_030255147.2	381290	Atp2b4	transcript	1.79149	0	Inf	0.000233871	0.0276354
NR_028422.1	100303644	C130080G10Rik	lncRNA	0.891445	34.4444	-5.27198	0.000110105	0.0276354	mmu-miR-214-3p	866.854	544.158	0.66229	0.00013468	0.0046466	TCONS_00001035	21961	Tns1	transcript	39.6786	2.46049	4.01134	0.00031257	0.0276354
NR_028422.1	100303644	C130080G10Rik	lncRNA	0.891445	34.4444	-5.27198	0.000110105	0.0276354	mmu-miR-214-3p	866.854	544.158	0.66229	0.00013468	0.0046466	TCONS_00022612	225049	Ttc7	transcript	1.28356	2.38495	-0.893809	1.15e-05	0.0155632
NR_028422.1	100303644	C130080G10Rik	lncRNA	0.891445	34.4444	-5.27198	0.000110105	0.0276354	mmu-miR-214-3p	866.854	544.158	0.66229	0.00013468	0.0046466	NM_011207.2	545622	Ptpn3	transcript	2.85143	0.047324	5.91297	0.000765875	0.0276354
NR_028422.1	100303644	C130080G10Rik	lncRNA	0.891445	34.4444	-5.27198	0.000110105	0.0276354	mmu-miR-214-3p	866.854	544.158	0.66229	0.00013468	0.0046466	XM_036154088.1	319518	Pdpr	transcript	1.61977	3.72043	-1.19968	0.000122455	0.0276354
NR_028422.1	100303644	C130080G10Rik	lncRNA	0.891445	34.4444	-5.27198	0.000110105	0.0276354	mmu-miR-214-3p	866.854	544.158	0.66229	0.00013468	0.0046466	NM_020486.2	57278	Bcam	transcript	97.5158	46.6059	1.06512	0.000167128	0.0276354
NR_028422.1	100303644	C130080G10Rik	lncRNA	0.891445	34.4444	-5.27198	0.000110105	0.0276354	mmu-miR-214-3p	866.854	544.158	0.66229	0.00013468	0.0046466	TCONS_00020016	65246	Xpo7	transcript	4.13029	0.00722533	9.15896	0.00116536	0.0326432
NR_028422.1	100303644	C130080G10Rik	lncRNA	0.891445	34.4444	-5.27198	0.000110105	0.0276354	mmu-miR-214-3p	866.854	544.158	0.66229	0.00013468	0.0046466	NM_009818.1	12385	Ctnna1	transcript	89.2245	90.2244	-0.0160775	0.000857497	0.0281337
NR_028422.1	100303644	C130080G10Rik	lncRNA	0.891445	34.4444	-5.27198	0.000110105	0.0276354	mmu-miR-214-3p	866.854	544.158	0.66229	0.00013468	0.0046466	NM_001347446.1	94089	Trim7	transcript	1.16147	7.15854	-2.62371	0.00045152	0.0276354
NR_028422.1	100303644	C130080G10Rik	lncRNA	0.891445	34.4444	-5.27198	0.000110105	0.0276354	mmu-miR-214-3p	866.854	544.158	0.66229	0.00013468	0.0046466	TCONS_00012153	76808	Rpl18a	transcript	32.7855	0	Inf	2.77e-05	0.0155632
NR_028422.1	100303644	C130080G10Rik	lncRNA	0.891445	34.4444	-5.27198	0.000110105	0.0276354	mmu-miR-214-3p	866.854	544.158	0.66229	0.00013468	0.0046466	XM_006534391.5	75580	Zbtb4	transcript	1.27003	0	Inf	0.000820671	0.0276354
NR_028422.1	100303644	C130080G10Rik	lncRNA	0.891445	34.4444	-5.27198	0.000110105	0.0276354	mmu-miR-214-3p	866.854	544.158	0.66229	0.00013468	0.0046466	NM_054046.5	23854	Def8	transcript	8.18934	6.47494	0.33888	0.0016116	0.037419
NR_028422.1	100303644	C130080G10Rik	lncRNA	0.891445	34.4444	-5.27198	0.000110105	0.0276354	mmu-miR-214-3p	866.854	544.158	0.66229	0.00013468	0.0046466	NM_024288.2	68477	Rmnd5a	transcript	14.9293	15.4847	-0.0526959	0.000690882	0.0276354
NR_028422.1	100303644	C130080G10Rik	lncRNA	0.891445	34.4444	-5.27198	0.000110105	0.0276354	mmu-miR-214-3p	866.854	544.158	0.66229	0.00013468	0.0046466	TCONS_00022295	81877	Tnxb	transcript	1.75426	0	Inf	0.000820671	0.0276354
NR_028422.1	100303644	C130080G10Rik	lncRNA	0.891445	34.4444	-5.27198	0.000110105	0.0276354	mmu-miR-214-3p	866.854	544.158	0.66229	0.00013468	0.0046466	NM_001165902.1	12387	Ctnnb1	transcript	1.01086	0.074119	3.76959	0.000164837	0.0276354
NR_028422.1	100303644	C130080G10Rik	lncRNA	0.891445	34.4444	-5.27198	0.000110105	0.0276354	mmu-miR-214-3p	866.854	544.158	0.66229	0.00013468	0.0046466	NM_008138.5	14678	Gnai2	transcript	64.7581	38.7376	0.741328	0.000133889	0.0276354
NR_028422.1	100303644	C130080G10Rik	lncRNA	0.891445	34.4444	-5.27198	0.000110105	0.0276354	mmu-miR-214-3p	866.854	544.158	0.66229	0.00013468	0.0046466	NM_001169577.1	22214	Ube2h	transcript	1.41218	0.0643033	4.45689	0.00189306	0.0407486
NR_028422.1	100303644	C130080G10Rik	lncRNA	0.891445	34.4444	-5.27198	0.000110105	0.0276354	mmu-miR-214-3p	866.854	544.158	0.66229	0.00013468	0.0046466	NM_170760.3	233073	U2af1l4	transcript	10.7881	11.8091	-0.13046	0.00194872	0.0413468
NR_028422.1	100303644	C130080G10Rik	lncRNA	0.891445	34.4444	-5.27198	0.000110105	0.0276354	mmu-miR-214-3p	866.854	544.158	0.66229	0.00013468	0.0046466	NM_011785.4	23797	Akt3	transcript	1.5986	0.0690953	4.53208	0.0015947	0.037419
NR_028422.1	100303644	C130080G10Rik	lncRNA	0.891445	34.4444	-5.27198	0.000110105	0.0276354	mmu-miR-214-3p	866.854	544.158	0.66229	0.00013468	0.0046466	XM_006521705.3	107589	Mylk	transcript	3.13462	3.83408	-0.290594	0.00265995	0.0492416
NR_028422.1	100303644	C130080G10Rik	lncRNA	0.891445	34.4444	-5.27198	0.000110105	0.0276354	mmu-miR-214-3p	866.854	544.158	0.66229	0.00013468	0.0046466	NM_138591.2	28030	Gfm1	transcript	34.2978	39.8161	-0.215235	0.00123449	0.0335637
NR_028422.1	100303644	C130080G10Rik	lncRNA	0.891445	34.4444	-5.27198	0.000110105	0.0276354	mmu-miR-214-3p	866.854	544.158	0.66229	0.00013468	0.0046466	TCONS_00005210	21687	Tek	transcript	2.18464	0	Inf	0.000820671	0.0276354
NR_028422.1	100303644	C130080G10Rik	lncRNA	0.891445	34.4444	-5.27198	0.000110105	0.0276354	mmu-miR-214-3p	866.854	544.158	0.66229	0.00013468	0.0046466	NM_053009.3	109910	Zfp91	transcript	24.0255	23.1627	0.0527611	0.000930839	0.0292165
NR_028422.1	100303644	C130080G10Rik	lncRNA	0.891445	34.4444	-5.27198	0.000110105	0.0276354	mmu-miR-214-3p	866.854	544.158	0.66229	0.00013468	0.0046466	NM_024214.2	67952	Tomm20	transcript	10.2066	7.84903	0.378922	0.000773909	0.0276354
NR_028422.1	100303644	C130080G10Rik	lncRNA	0.891445	34.4444	-5.27198	0.000110105	0.0276354	mmu-miR-214-3p	866.854	544.158	0.66229	0.00013468	0.0046466	NM_001012477.2	20315	Cxcl12	transcript	8.72303	23.6765	-1.44055	0.000741939	0.0276354
NR_028422.1	100303644	C130080G10Rik	lncRNA	0.891445	34.4444	-5.27198	0.000110105	0.0276354	mmu-miR-214-3p	866.854	544.158	0.66229	0.00013468	0.0046466	NM_001013024.2	72607	Usp13	transcript	43.9871	44.7173	-0.0237507	0.000631592	0.0276354
NR_028422.1	100303644	C130080G10Rik	lncRNA	0.891445	34.4444	-5.27198	0.000110105	0.0276354	mmu-miR-214-3p	866.854	544.158	0.66229	0.00013468	0.0046466	XM_030250848.1	228998	Arfgap1	transcript	1.08784	0	Inf	0.000820671	0.0276354
NR_028422.1	100303644	C130080G10Rik	lncRNA	0.891445	34.4444	-5.27198	0.000110105	0.0276354	mmu-miR-214-3p	866.854	544.158	0.66229	0.00013468	0.0046466	NM_001081979.2	17257	Mecp2	transcript	3.25013	3.79955	-0.22533	0.000372863	0.0276354
NR_028422.1	100303644	C130080G10Rik	lncRNA	0.891445	34.4444	-5.27198	0.000110105	0.0276354	mmu-miR-214-3p	866.854	544.158	0.66229	0.00013468	0.0046466	NM_053159.4	94062	Mrpl3	transcript	20.8991	24.078	-0.204272	1.09e-05	0.0155632
NR_028422.1	100303644	C130080G10Rik	lncRNA	0.891445	34.4444	-5.27198	0.000110105	0.0276354	mmu-miR-214-3p	866.854	544.158	0.66229	0.00013468	0.0046466	NM_001253757.1	66471	Anp32e	transcript	1.72974	1.29992	0.412137	0.00160311	0.037419
NR_028422.1	100303644	C130080G10Rik	lncRNA	0.891445	34.4444	-5.27198	0.000110105	0.0276354	mmu-miR-214-3p	866.854	544.158	0.66229	0.00013468	0.0046466	NM_133808.5	110611	Hdlbp	transcript	60.027	71.0376	-0.242973	0.00219802	0.0438821
NR_028422.1	100303644	C130080G10Rik	lncRNA	0.891445	34.4444	-5.27198	0.000110105	0.0276354	mmu-miR-214-3p	866.854	544.158	0.66229	0.00013468	0.0046466	NM_001360132.1	20130	Rras	transcript	1.46932	0	Inf	0.000820671	0.0276354
NR_028422.1	100303644	C130080G10Rik	lncRNA	0.891445	34.4444	-5.27198	0.000110105	0.0276354	mmu-miR-214-3p	866.854	544.158	0.66229	0.00013468	0.0046466	XM_036165784.1	12321	Calu	transcript	10.5439	16.3948	-0.636826	0.00157708	0.0372453
NR_028422.1	100303644	C130080G10Rik	lncRNA	0.891445	34.4444	-5.27198	0.000110105	0.0276354	mmu-miR-214-3p	866.854	544.158	0.66229	0.00013468	0.0046466	XM_006530878.1	234595	Slc38a7	transcript	0.923806	0.0383027	4.59207	3.17e-05	0.0155632
NR_028422.1	100303644	C130080G10Rik	lncRNA	0.891445	34.4444	-5.27198	0.000110105	0.0276354	mmu-miR-214-3p	866.854	544.158	0.66229	0.00013468	0.0046466	TCONS_00020910	223697	Sun2	transcript	2.54478	0	Inf	0.000820671	0.0276354
NR_028422.1	100303644	C130080G10Rik	lncRNA	0.891445	34.4444	-5.27198	0.000110105	0.0276354	mmu-miR-214-3p	866.854	544.158	0.66229	0.00013468	0.0046466	NM_010489.2	15587	Hyal2	transcript	3.40604	0.443805	2.94009	0.00142619	0.0355126
NR_028422.1	100303644	C130080G10Rik	lncRNA	0.891445	34.4444	-5.27198	0.000110105	0.0276354	mmu-miR-214-3p	866.854	544.158	0.66229	0.00013468	0.0046466	NM_024454.1	216344	Rab21	transcript	0.620409	17.8734	-4.84845	0.000508496	0.0276354
NR_028422.1	100303644	C130080G10Rik	lncRNA	0.891445	34.4444	-5.27198	0.000110105	0.0276354	mmu-miR-214-3p	866.854	544.158	0.66229	0.00013468	0.0046466	NM_001252638.1	69288	Rhobtb1	transcript	0.0385657	2.18074	-5.82136	0.00249007	0.0476339
NR_028422.1	100303644	C130080G10Rik	lncRNA	0.891445	34.4444	-5.27198	0.000110105	0.0276354	mmu-miR-214-3p	866.854	544.158	0.66229	0.00013468	0.0046466	NM_177059.3	320027	Fstl4	transcript	2.66003	0	Inf	0.00041668	0.0276354
NR_028422.1	100303644	C130080G10Rik	lncRNA	0.891445	34.4444	-5.27198	0.000110105	0.0276354	mmu-miR-214-3p	866.854	544.158	0.66229	0.00013468	0.0046466	NM_009634.6	11564	Adsl	transcript	8.39214	7.60029	0.142984	0.000689457	0.0276354
NR_028422.1	100303644	C130080G10Rik	lncRNA	0.891445	34.4444	-5.27198	0.000110105	0.0276354	mmu-miR-214-3p	866.854	544.158	0.66229	0.00013468	0.0046466	XM_006522138.4	252870	Usp7	transcript	1.00697	0	Inf	0.000820671	0.0276354
NR_028422.1	100303644	C130080G10Rik	lncRNA	0.891445	34.4444	-5.27198	0.000110105	0.0276354	mmu-miR-214-3p	866.854	544.158	0.66229	0.00013468	0.0046466	TCONS_00023376	19290	Pura	transcript	2.15409	0.008678	7.9555	0.00096005	0.0297987
NR_028422.1	100303644	C130080G10Rik	lncRNA	0.891445	34.4444	-5.27198	0.000110105	0.0276354	mmu-miR-214-3p	866.854	544.158	0.66229	0.00013468	0.0046466	TCONS_00017162	11430	Acox1	transcript	12.213	0.001165	13.3558	0.000790298	0.0276354
NR_028422.1	100303644	C130080G10Rik	lncRNA	0.891445	34.4444	-5.27198	0.000110105	0.0276354	mmu-miR-214-3p	866.854	544.158	0.66229	0.00013468	0.0046466	XM_006515925.4	26932	Ppp2r5e	transcript	1.17794	0.258766	2.18654	0.000952025	0.0296311
NR_028422.1	100303644	C130080G10Rik	lncRNA	0.891445	34.4444	-5.27198	0.000110105	0.0276354	mmu-miR-214-3p	866.854	544.158	0.66229	0.00013468	0.0046466	NM_029573.2	67834	Idh3a	transcript	102.21	117.679	-0.203314	0.000977083	0.0298464
NR_028422.1	100303644	C130080G10Rik	lncRNA	0.891445	34.4444	-5.27198	0.000110105	0.0276354	mmu-miR-214-3p	866.854	544.158	0.66229	0.00013468	0.0046466	NM_018743.4	102247	Gpat4	transcript	7.76624	6.97285	0.155467	0.00132739	0.0345061
NR_028422.1	100303644	C130080G10Rik	lncRNA	0.891445	34.4444	-5.27198	0.000110105	0.0276354	mmu-miR-214-3p	866.854	544.158	0.66229	0.00013468	0.0046466	NM_027558.1	70804	Pgrmc2	transcript	13.5548	8.47909	0.676825	0.000359363	0.0276354
NR_028422.1	100303644	C130080G10Rik	lncRNA	0.891445	34.4444	-5.27198	0.000110105	0.0276354	mmu-miR-214-3p	866.854	544.158	0.66229	0.00013468	0.0046466	NM_008681.2	17988	Ndrg1	transcript	13.4879	7.27813	0.890022	0.00249471	0.0476436
NR_168272.1	105246846	Gm42067	lncRNA	1.1143	4.44833	-1.99712	0.00121801	0.0333441	mmu-miR-214-3p	866.854	544.158	0.66229	0.00013468	0.0046466	XM_006519358.3	65107	Lrp10	transcript	2.10967	0.25084	3.07218	0.00255949	0.0482407
NR_168272.1	105246846	Gm42067	lncRNA	1.1143	4.44833	-1.99712	0.00121801	0.0333441	mmu-miR-214-3p	866.854	544.158	0.66229	0.00013468	0.0046466	TCONS_00004132	229663	Csde1	transcript	48.2189	63.0905	-0.387826	0.0012973	0.0342571
NR_168272.1	105246846	Gm42067	lncRNA	1.1143	4.44833	-1.99712	0.00121801	0.0333441	mmu-miR-214-3p	866.854	544.158	0.66229	0.00013468	0.0046466	NM_007395.4	11479	Acvr1b	transcript	6.46432	3.77857	0.774661	0.000388991	0.0276354
NR_168272.1	105246846	Gm42067	lncRNA	1.1143	4.44833	-1.99712	0.00121801	0.0333441	mmu-miR-214-3p	866.854	544.158	0.66229	0.00013468	0.0046466	TCONS_00022043	20656	Sod2	transcript	6.07359	0.19545	4.95768	0.0002461	0.0276354
NR_168272.1	105246846	Gm42067	lncRNA	1.1143	4.44833	-1.99712	0.00121801	0.0333441	mmu-miR-214-3p	866.854	544.158	0.66229	0.00013468	0.0046466	NM_001013390.3	399548	Scn4b	transcript	2.15251	16.2847	-2.91942	0.00111032	0.0316263
NR_168272.1	105246846	Gm42067	lncRNA	1.1143	4.44833	-1.99712	0.00121801	0.0333441	mmu-miR-214-3p	866.854	544.158	0.66229	0.00013468	0.0046466	XM_006503677.4	11518	Add1	transcript	1.28784	0.00563833	7.83547	0.000849239	0.028103
NR_168272.1	105246846	Gm42067	lncRNA	1.1143	4.44833	-1.99712	0.00121801	0.0333441	mmu-miR-214-3p	866.854	544.158	0.66229	0.00013468	0.0046466	NM_001077184.1	12215	Bsg	transcript	229.288	397.283	-0.793008	0.0014193	0.0355126
NR_168272.1	105246846	Gm42067	lncRNA	1.1143	4.44833	-1.99712	0.00121801	0.0333441	mmu-miR-214-3p	866.854	544.158	0.66229	0.00013468	0.0046466	XM_006507175.4	101706	Numa1	transcript	2.05864	1.25498	0.714031	0.00217807	0.0438821
NR_168272.1	105246846	Gm42067	lncRNA	1.1143	4.44833	-1.99712	0.00121801	0.0333441	mmu-miR-214-3p	866.854	544.158	0.66229	0.00013468	0.0046466	XM_006538665.4	192185	Nadk	transcript	0.972007	0.0104583	6.53824	0.00196035	0.0413468
NR_168272.1	105246846	Gm42067	lncRNA	1.1143	4.44833	-1.99712	0.00121801	0.0333441	mmu-miR-214-3p	866.854	544.158	0.66229	0.00013468	0.0046466	NM_026524.4	68041	Mid1ip1	transcript	37.9267	30.3802	0.320079	0.000987289	0.0299274
NR_168272.1	105246846	Gm42067	lncRNA	1.1143	4.44833	-1.99712	0.00121801	0.0333441	mmu-miR-214-3p	866.854	544.158	0.66229	0.00013468	0.0046466	XM_036157952.1	12908	Crat	transcript	3.05654	0	Inf	5.87e-05	0.0211184
NR_168272.1	105246846	Gm42067	lncRNA	1.1143	4.44833	-1.99712	0.00121801	0.0333441	mmu-miR-214-3p	866.854	544.158	0.66229	0.00013468	0.0046466	NM_011293.2	20022	Polr2j	transcript	13.2814	15.4381	-0.217088	0.000690938	0.0276354
NR_168272.1	105246846	Gm42067	lncRNA	1.1143	4.44833	-1.99712	0.00121801	0.0333441	mmu-miR-214-3p	866.854	544.158	0.66229	0.00013468	0.0046466	NM_013799.3	11907	Ate1	transcript	1.05172	0.261099	2.01008	0.0019568	0.0413468
NR_168272.1	105246846	Gm42067	lncRNA	1.1143	4.44833	-1.99712	0.00121801	0.0333441	mmu-miR-214-3p	866.854	544.158	0.66229	0.00013468	0.0046466	NM_022032.4	64058	Perp	transcript	119.731	36.8542	1.6999	0.00103486	0.0304533
NR_168272.1	105246846	Gm42067	lncRNA	1.1143	4.44833	-1.99712	0.00121801	0.0333441	mmu-miR-214-3p	866.854	544.158	0.66229	0.00013468	0.0046466	NM_130449.2	140792	Colec12	transcript	3.99678	3.31964	0.26781	0.00250276	0.0477182
NR_168272.1	105246846	Gm42067	lncRNA	1.1143	4.44833	-1.99712	0.00121801	0.0333441	mmu-miR-214-3p	866.854	544.158	0.66229	0.00013468	0.0046466	NM_020332.4	11732	Ank	transcript	34.408	47.7049	-0.471394	9.3e-06	0.0155632
NR_168272.1	105246846	Gm42067	lncRNA	1.1143	4.44833	-1.99712	0.00121801	0.0333441	mmu-miR-214-3p	866.854	544.158	0.66229	0.00013468	0.0046466	NM_146243.2	66713	Actr2	transcript	29.0525	22.8911	0.343875	0.00149481	0.0362404
NR_168272.1	105246846	Gm42067	lncRNA	1.1143	4.44833	-1.99712	0.00121801	0.0333441	mmu-miR-214-3p	866.854	544.158	0.66229	0.00013468	0.0046466	NM_145605.2	234825	Klhdc4	transcript	1.15389	3.19303	-1.46842	0.000484263	0.0276354
NR_168272.1	105246846	Gm42067	lncRNA	1.1143	4.44833	-1.99712	0.00121801	0.0333441	mmu-miR-214-3p	866.854	544.158	0.66229	0.00013468	0.0046466	NM_009128.2	20250	Scd2	transcript	5.03621	2.28079	1.14281	0.00036858	0.0276354
NR_168272.1	105246846	Gm42067	lncRNA	1.1143	4.44833	-1.99712	0.00121801	0.0333441	mmu-miR-214-3p	866.854	544.158	0.66229	0.00013468	0.0046466	NM_146169.2	232164	Paip2b	transcript	8.94612	8.43108	0.0855459	0.00119144	0.0329033
NR_168272.1	105246846	Gm42067	lncRNA	1.1143	4.44833	-1.99712	0.00121801	0.0333441	mmu-miR-214-3p	866.854	544.158	0.66229	0.00013468	0.0046466	TCONS_00025423	66158	Rtl8a	transcript	1.29636	0	Inf	0.000820671	0.0276354
NR_168272.1	105246846	Gm42067	lncRNA	1.1143	4.44833	-1.99712	0.00121801	0.0333441	mmu-miR-214-3p	866.854	544.158	0.66229	0.00013468	0.0046466	NM_007616.4	12389	Cav1	transcript	43.4254	41.8983	0.0516465	0.000217852	0.0276354
NR_168272.1	105246846	Gm42067	lncRNA	1.1143	4.44833	-1.99712	0.00121801	0.0333441	mmu-miR-214-3p	866.854	544.158	0.66229	0.00013468	0.0046466	XM_036157306.1	217463	Snx13	transcript	1.9793	0	Inf	0.000820671	0.0276354
NR_168272.1	105246846	Gm42067	lncRNA	1.1143	4.44833	-1.99712	0.00121801	0.0333441	mmu-miR-214-3p	866.854	544.158	0.66229	0.00013468	0.0046466	XM_036162479.1	66691	Gapvd1	transcript	0.923883	0.00617833	7.22435	0.00246229	0.0472596
NR_168272.1	105246846	Gm42067	lncRNA	1.1143	4.44833	-1.99712	0.00121801	0.0333441	mmu-miR-214-3p	866.854	544.158	0.66229	0.00013468	0.0046466	NM_026919.1	69038	Tmem258	transcript	30.5924	45.4779	-0.571991	0.00175494	0.0386422
NR_168272.1	105246846	Gm42067	lncRNA	1.1143	4.44833	-1.99712	0.00121801	0.0333441	mmu-miR-214-3p	866.854	544.158	0.66229	0.00013468	0.0046466	TCONS_00019782	50527	Ero1a	transcript	1.12978	0	Inf	0.000820671	0.0276354
NR_168272.1	105246846	Gm42067	lncRNA	1.1143	4.44833	-1.99712	0.00121801	0.0333441	mmu-miR-214-3p	866.854	544.158	0.66229	0.00013468	0.0046466	TCONS_00000691	320404	Itpkb	transcript	2.74831	0	Inf	0.00022582	0.0276354
NR_168272.1	105246846	Gm42067	lncRNA	1.1143	4.44833	-1.99712	0.00121801	0.0333441	mmu-miR-214-3p	866.854	544.158	0.66229	0.00013468	0.0046466	XM_011246234.2	106522	Pkdcc	transcript	0.975937	0	Inf	0.000820671	0.0276354
NR_168272.1	105246846	Gm42067	lncRNA	1.1143	4.44833	-1.99712	0.00121801	0.0333441	mmu-miR-214-3p	866.854	544.158	0.66229	0.00013468	0.0046466	XM_006517134.5	18193	Nsd1	transcript	1.9852	0.448937	2.1447	0.00060106	0.0276354
NR_168272.1	105246846	Gm42067	lncRNA	1.1143	4.44833	-1.99712	0.00121801	0.0333441	mmu-miR-214-3p	866.854	544.158	0.66229	0.00013468	0.0046466	NM_010633.4	16589	Uhmk1	transcript	7.61792	5.62359	0.437905	0.00058092	0.0276354
NR_168272.1	105246846	Gm42067	lncRNA	1.1143	4.44833	-1.99712	0.00121801	0.0333441	mmu-miR-214-3p	866.854	544.158	0.66229	0.00013468	0.0046466	NM_016709.2	11992	Auh	transcript	23.1108	25.9264	-0.165855	0.00124159	0.0335637
NR_168272.1	105246846	Gm42067	lncRNA	1.1143	4.44833	-1.99712	0.00121801	0.0333441	mmu-miR-214-3p	866.854	544.158	0.66229	0.00013468	0.0046466	XM_030246370.1	72729	Cdc42se2	transcript	1.75393	0.133176	3.71919	3e-05	0.0155632
NR_168272.1	105246846	Gm42067	lncRNA	1.1143	4.44833	-1.99712	0.00121801	0.0333441	mmu-miR-214-3p	866.854	544.158	0.66229	0.00013468	0.0046466	XM_006504490.4	66711	Sbds	transcript	5.04204	0.162342	4.9569	0.000582299	0.0276354
NR_168272.1	105246846	Gm42067	lncRNA	1.1143	4.44833	-1.99712	0.00121801	0.0333441	mmu-miR-214-3p	866.854	544.158	0.66229	0.00013468	0.0046466	NM_027859.3	71673	Rnf215	transcript	2.26533	2.64791	-0.22513	0.00109052	0.0314747
NR_168272.1	105246846	Gm42067	lncRNA	1.1143	4.44833	-1.99712	0.00121801	0.0333441	mmu-miR-214-3p	866.854	544.158	0.66229	0.00013468	0.0046466	TCONS_00017675	68519	Eml1	transcript	11.0496	10.9045	0.0190772	0.00239943	0.0465183
NR_168272.1	105246846	Gm42067	lncRNA	1.1143	4.44833	-1.99712	0.00121801	0.0333441	mmu-miR-214-3p	866.854	544.158	0.66229	0.00013468	0.0046466	NM_177411.4	19344	Rab5b	transcript	15.3906	17.862	-0.214852	0.000321654	0.0276354
NR_168272.1	105246846	Gm42067	lncRNA	1.1143	4.44833	-1.99712	0.00121801	0.0333441	mmu-miR-214-3p	866.854	544.158	0.66229	0.00013468	0.0046466	TCONS_00025632	14605	Tsc22d3	transcript	6.76223	7.56572	-0.161979	0.00193513	0.0411922
NR_168272.1	105246846	Gm42067	lncRNA	1.1143	4.44833	-1.99712	0.00121801	0.0333441	mmu-miR-214-3p	866.854	544.158	0.66229	0.00013468	0.0046466	XM_030248555.2	239555	Mief1	transcript	1.40417	0.071697	4.29166	0.00216897	0.0438208
NR_168272.1	105246846	Gm42067	lncRNA	1.1143	4.44833	-1.99712	0.00121801	0.0333441	mmu-miR-214-3p	866.854	544.158	0.66229	0.00013468	0.0046466	TCONS_00011889	16337	Insr	transcript	3.80413	0	Inf	3.51e-05	0.0155632
NR_168272.1	105246846	Gm42067	lncRNA	1.1143	4.44833	-1.99712	0.00121801	0.0333441	mmu-miR-214-3p	866.854	544.158	0.66229	0.00013468	0.0046466	TCONS_00023739	76594	Dnajc18	transcript	1.93372	0	Inf	0.000820671	0.0276354
NR_168272.1	105246846	Gm42067	lncRNA	1.1143	4.44833	-1.99712	0.00121801	0.0333441	mmu-miR-214-3p	866.854	544.158	0.66229	0.00013468	0.0046466	NM_145929.2	106039	Gga1	transcript	10.8709	8.79062	0.306438	0.0015586	0.0372453
NR_168272.1	105246846	Gm42067	lncRNA	1.1143	4.44833	-1.99712	0.00121801	0.0333441	mmu-miR-214-3p	866.854	544.158	0.66229	0.00013468	0.0046466	TCONS_00001258	116847	Prelp	transcript	1.45639	0	Inf	0.000820671	0.0276354
NR_168272.1	105246846	Gm42067	lncRNA	1.1143	4.44833	-1.99712	0.00121801	0.0333441	mmu-miR-214-3p	866.854	544.158	0.66229	0.00013468	0.0046466	NM_019774.5	56399	Akap8	transcript	4.41498	4.61893	-0.0651514	0.0020109	0.0420282
NR_168272.1	105246846	Gm42067	lncRNA	1.1143	4.44833	-1.99712	0.00121801	0.0333441	mmu-miR-214-3p	866.854	544.158	0.66229	0.00013468	0.0046466	NM_001017429.2	12856	Cox17	transcript	100.01	129.573	-0.373622	0.00264968	0.0491363
NR_168272.1	105246846	Gm42067	lncRNA	1.1143	4.44833	-1.99712	0.00121801	0.0333441	mmu-miR-214-3p	866.854	544.158	0.66229	0.00013468	0.0046466	XM_011245351.4	223455	Marchf6	transcript	4.21198	0.316444	3.73447	0.00123918	0.0335637
NR_168272.1	105246846	Gm42067	lncRNA	1.1143	4.44833	-1.99712	0.00121801	0.0333441	mmu-miR-214-3p	866.854	544.158	0.66229	0.00013468	0.0046466	NM_019764.2	56332	Amotl2	transcript	14.284	9.48432	0.590781	0.000290535	0.0276354
NR_168272.1	105246846	Gm42067	lncRNA	1.1143	4.44833	-1.99712	0.00121801	0.0333441	mmu-miR-214-3p	866.854	544.158	0.66229	0.00013468	0.0046466	NM_133831.3	68077	Nop53	transcript	25.343	23.991	0.0790944	0.000321251	0.0276354
NR_168272.1	105246846	Gm42067	lncRNA	1.1143	4.44833	-1.99712	0.00121801	0.0333441	mmu-miR-214-3p	866.854	544.158	0.66229	0.00013468	0.0046466	NM_009776.3	12258	Serping1	transcript	16.347	19.022	-0.218642	0.000205943	0.0276354
NR_168272.1	105246846	Gm42067	lncRNA	1.1143	4.44833	-1.99712	0.00121801	0.0333441	mmu-miR-214-3p	866.854	544.158	0.66229	0.00013468	0.0046466	NM_011838.4	23936	Lynx1	transcript	25.7672	40.3626	-0.647487	0.000722116	0.0276354
NR_168272.1	105246846	Gm42067	lncRNA	1.1143	4.44833	-1.99712	0.00121801	0.0333441	mmu-miR-214-3p	866.854	544.158	0.66229	0.00013468	0.0046466	NM_011435.3	20657	Sod3	transcript	6.60321	9.08811	-0.460813	0.00117059	0.0326432
NR_168272.1	105246846	Gm42067	lncRNA	1.1143	4.44833	-1.99712	0.00121801	0.0333441	mmu-miR-214-3p	866.854	544.158	0.66229	0.00013468	0.0046466	XM_030250546.2	56386	B4galt6	transcript	1.70533	0.00590867	8.17301	0.00086113	0.0281727
NR_168272.1	105246846	Gm42067	lncRNA	1.1143	4.44833	-1.99712	0.00121801	0.0333441	mmu-miR-214-3p	866.854	544.158	0.66229	0.00013468	0.0046466	XM_030243724.1	80914	Uck2	transcript	2.38203	0.0179517	7.05193	0.000395132	0.0276354
NR_168272.1	105246846	Gm42067	lncRNA	1.1143	4.44833	-1.99712	0.00121801	0.0333441	mmu-miR-214-3p	866.854	544.158	0.66229	0.00013468	0.0046466	NM_008828.3	18655	Pgk1	transcript	83.217	79.3525	0.068602	0.00229255	0.0452466
NR_168272.1	105246846	Gm42067	lncRNA	1.1143	4.44833	-1.99712	0.00121801	0.0333441	mmu-miR-214-3p	866.854	544.158	0.66229	0.00013468	0.0046466	XM_036161354.1	228602	4930402H24Rik	transcript	1.31164	0.00155	9.72489	8.14e-05	0.0253471
NR_168272.1	105246846	Gm42067	lncRNA	1.1143	4.44833	-1.99712	0.00121801	0.0333441	mmu-miR-214-3p	866.854	544.158	0.66229	0.00013468	0.0046466	NM_029182.1	75141	Rasd2	transcript	5.28095	1.10421	2.25778	0.00103307	0.0304533
NR_168272.1	105246846	Gm42067	lncRNA	1.1143	4.44833	-1.99712	0.00121801	0.0333441	mmu-miR-214-3p	866.854	544.158	0.66229	0.00013468	0.0046466	NM_173735.3	217732	Cipc	transcript	2.22002	0.086604	4.68	0.000543181	0.0276354
NR_168272.1	105246846	Gm42067	lncRNA	1.1143	4.44833	-1.99712	0.00121801	0.0333441	mmu-miR-214-3p	866.854	544.158	0.66229	0.00013468	0.0046466	NM_010385.2	14976	Pfdn6	transcript	13.2552	17.8863	-0.4323	0.00108699	0.0314517
NR_168272.1	105246846	Gm42067	lncRNA	1.1143	4.44833	-1.99712	0.00121801	0.0333441	mmu-miR-214-3p	866.854	544.158	0.66229	0.00013468	0.0046466	NM_001161420.1	22359	Vldlr	transcript	2.8505	7.64704	-1.42369	0.000891982	0.0287892
NR_168272.1	105246846	Gm42067	lncRNA	1.1143	4.44833	-1.99712	0.00121801	0.0333441	mmu-miR-214-3p	866.854	544.158	0.66229	0.00013468	0.0046466	NM_008688.3	18029	Nfic	transcript	4.59623	14.0914	-1.61629	0.00200236	0.0419257
NR_168272.1	105246846	Gm42067	lncRNA	1.1143	4.44833	-1.99712	0.00121801	0.0333441	mmu-miR-214-3p	866.854	544.158	0.66229	0.00013468	0.0046466	NM_008338.4	15980	Ifngr2	transcript	40.1831	60.2437	-0.584221	7.98e-05	0.0253471
NR_168272.1	105246846	Gm42067	lncRNA	1.1143	4.44833	-1.99712	0.00121801	0.0333441	mmu-miR-214-3p	866.854	544.158	0.66229	0.00013468	0.0046466	NM_001115132.2	52683	Ncaph2	transcript	3.1926	0.540685	2.56187	0.00108613	0.0314517
NR_168272.1	105246846	Gm42067	lncRNA	1.1143	4.44833	-1.99712	0.00121801	0.0333441	mmu-miR-214-3p	866.854	544.158	0.66229	0.00013468	0.0046466	NM_021284.6	16653	Kras	transcript	6.68577	7.24422	-0.115735	0.000780807	0.0276354
NR_168272.1	105246846	Gm42067	lncRNA	1.1143	4.44833	-1.99712	0.00121801	0.0333441	mmu-miR-214-3p	866.854	544.158	0.66229	0.00013468	0.0046466	NM_025407.2	22273	Uqcrc1	transcript	305.19	377.485	-0.306711	0.000478795	0.0276354
NR_168272.1	105246846	Gm42067	lncRNA	1.1143	4.44833	-1.99712	0.00121801	0.0333441	mmu-miR-214-3p	866.854	544.158	0.66229	0.00013468	0.0046466	XM_030245515.2	12808	Cobl	transcript	1.22489	0.014136	6.43713	0.000731975	0.0276354
NR_168272.1	105246846	Gm42067	lncRNA	1.1143	4.44833	-1.99712	0.00121801	0.0333441	mmu-miR-214-3p	866.854	544.158	0.66229	0.00013468	0.0046466	NM_175236.5	76187	Adhfe1	transcript	5.22125	5.88058	-0.171562	0.00131045	0.0342571
NR_168272.1	105246846	Gm42067	lncRNA	1.1143	4.44833	-1.99712	0.00121801	0.0333441	mmu-miR-214-3p	866.854	544.158	0.66229	0.00013468	0.0046466	NM_197990.3	69399	1700025G04Rik	transcript	6.52172	2.62541	1.31271	0.000479421	0.0276354
NR_168272.1	105246846	Gm42067	lncRNA	1.1143	4.44833	-1.99712	0.00121801	0.0333441	mmu-miR-214-3p	866.854	544.158	0.66229	0.00013468	0.0046466	NM_133664.3	16763	Lad1	transcript	2.17237	0.171618	3.662	0.000206847	0.0276354
NR_168272.1	105246846	Gm42067	lncRNA	1.1143	4.44833	-1.99712	0.00121801	0.0333441	mmu-miR-214-3p	866.854	544.158	0.66229	0.00013468	0.0046466	NM_198013.3	103841	Cuedc1	transcript	9.33807	8.4224	0.148893	0.0015783	0.0372453
NR_168272.1	105246846	Gm42067	lncRNA	1.1143	4.44833	-1.99712	0.00121801	0.0333441	mmu-miR-214-3p	866.854	544.158	0.66229	0.00013468	0.0046466	NM_001110844.1	12293	Cacna2d1	transcript	0.631283	4.45131	-2.81787	0.000493731	0.0276354
NR_168272.1	105246846	Gm42067	lncRNA	1.1143	4.44833	-1.99712	0.00121801	0.0333441	mmu-miR-214-3p	866.854	544.158	0.66229	0.00013468	0.0046466	NM_146193.2	83962	Btbd1	transcript	36.2804	34.6035	0.0682754	0.00168654	0.0382088
NR_168272.1	105246846	Gm42067	lncRNA	1.1143	4.44833	-1.99712	0.00121801	0.0333441	mmu-miR-214-3p	866.854	544.158	0.66229	0.00013468	0.0046466	NM_001355651.1	74182	Gpcpd1	transcript	1.98661	0.186929	3.40975	0.00197354	0.041549
NR_168272.1	105246846	Gm42067	lncRNA	1.1143	4.44833	-1.99712	0.00121801	0.0333441	mmu-miR-214-3p	866.854	544.158	0.66229	0.00013468	0.0046466	TCONS_00022742	30957	Mapk8ip3	transcript	0.033413	2.79614	-6.38688	0.000274522	0.0276354
NR_168272.1	105246846	Gm42067	lncRNA	1.1143	4.44833	-1.99712	0.00121801	0.0333441	mmu-miR-214-3p	866.854	544.158	0.66229	0.00013468	0.0046466	NM_025828.3	66890	Lman2	transcript	13.183	13.5281	-0.0372866	0.00183952	0.0400109
NR_168272.1	105246846	Gm42067	lncRNA	1.1143	4.44833	-1.99712	0.00121801	0.0333441	mmu-miR-214-3p	866.854	544.158	0.66229	0.00013468	0.0046466	NM_019694.2	56384	Letm1	transcript	5.73717	11.2145	-0.966953	0.000238425	0.0276354
NR_168272.1	105246846	Gm42067	lncRNA	1.1143	4.44833	-1.99712	0.00121801	0.0333441	mmu-miR-214-3p	866.854	544.158	0.66229	0.00013468	0.0046466	NM_011908.2	24109	Ubl3	transcript	7.77652	18.8816	-1.27979	2.2e-05	0.0155632
NR_168272.1	105246846	Gm42067	lncRNA	1.1143	4.44833	-1.99712	0.00121801	0.0333441	mmu-miR-214-3p	866.854	544.158	0.66229	0.00013468	0.0046466	NM_001164191.1	17772	Mtm1	transcript	4.86962	4.57993	0.0884856	0.00244339	0.0472115
NR_168272.1	105246846	Gm42067	lncRNA	1.1143	4.44833	-1.99712	0.00121801	0.0333441	mmu-miR-214-3p	866.854	544.158	0.66229	0.00013468	0.0046466	NM_001289702.1	83679	Pde4dip	transcript	26.0448	32.6548	-0.326299	0.00157065	0.0372453
NR_168272.1	105246846	Gm42067	lncRNA	1.1143	4.44833	-1.99712	0.00121801	0.0333441	mmu-miR-214-3p	866.854	544.158	0.66229	0.00013468	0.0046466	XM_036161998.1	241694	Ralgapa2	transcript	4.94291	0.169671	4.86455	0.000222044	0.0276354
NR_168272.1	105246846	Gm42067	lncRNA	1.1143	4.44833	-1.99712	0.00121801	0.0333441	mmu-miR-214-3p	866.854	544.158	0.66229	0.00013468	0.0046466	XM_036156454.1	19345	Rab5c	transcript	1.04576	0	Inf	0.000756013	0.0276354
NR_168272.1	105246846	Gm42067	lncRNA	1.1143	4.44833	-1.99712	0.00121801	0.0333441	mmu-miR-214-3p	866.854	544.158	0.66229	0.00013468	0.0046466	XM_036155419.1	84585	Rnf123	transcript	0.992394	0.075402	3.71824	0.00019691	0.0276354
NR_168272.1	105246846	Gm42067	lncRNA	1.1143	4.44833	-1.99712	0.00121801	0.0333441	mmu-miR-214-3p	866.854	544.158	0.66229	0.00013468	0.0046466	NM_028771.3	52132	Ccdc97	transcript	0.353089	5.23544	-3.89021	0.000248656	0.0276354
NR_168272.1	105246846	Gm42067	lncRNA	1.1143	4.44833	-1.99712	0.00121801	0.0333441	mmu-miR-214-3p	866.854	544.158	0.66229	0.00013468	0.0046466	TCONS_00007852	59008	Anapc5	transcript	3.69736	0	Inf	0.000820671	0.0276354
NR_168272.1	105246846	Gm42067	lncRNA	1.1143	4.44833	-1.99712	0.00121801	0.0333441	mmu-miR-214-3p	866.854	544.158	0.66229	0.00013468	0.0046466	TCONS_00020139	16880	Lifr	transcript	1.30271	0	Inf	0.000820671	0.0276354
NR_168272.1	105246846	Gm42067	lncRNA	1.1143	4.44833	-1.99712	0.00121801	0.0333441	mmu-miR-214-3p	866.854	544.158	0.66229	0.00013468	0.0046466	NM_178253.5	271005	Klhdc1	transcript	4.29811	8.4043	-0.967424	0.000211255	0.0276354
NR_168272.1	105246846	Gm42067	lncRNA	1.1143	4.44833	-1.99712	0.00121801	0.0333441	mmu-miR-214-3p	866.854	544.158	0.66229	0.00013468	0.0046466	NM_175523.5	243382	Ppm1k	transcript	41.3824	25.3879	0.704875	0.000348613	0.0276354
NR_168272.1	105246846	Gm42067	lncRNA	1.1143	4.44833	-1.99712	0.00121801	0.0333441	mmu-miR-214-3p	866.854	544.158	0.66229	0.00013468	0.0046466	NM_026275.4	67615	Ube2r2	transcript	5.99431	0.341337	4.13433	0.000853945	0.0281337
NR_168272.1	105246846	Gm42067	lncRNA	1.1143	4.44833	-1.99712	0.00121801	0.0333441	mmu-miR-214-3p	866.854	544.158	0.66229	0.00013468	0.0046466	NM_007798.3	13030	Ctsb	transcript	44.5757	45.1527	-0.018554	7.35e-05	0.0248953
NR_168272.1	105246846	Gm42067	lncRNA	1.1143	4.44833	-1.99712	0.00121801	0.0333441	mmu-miR-214-3p	866.854	544.158	0.66229	0.00013468	0.0046466	XM_006533995.4	67473	Slc47a1	transcript	1.20768	0.0603787	4.32205	0.000196345	0.0276354
NR_168272.1	105246846	Gm42067	lncRNA	1.1143	4.44833	-1.99712	0.00121801	0.0333441	mmu-miR-214-3p	866.854	544.158	0.66229	0.00013468	0.0046466	NM_008258.2	15374	Jpt1	transcript	29.7754	15.9326	0.90214	0.00268557	0.0494042
NR_168272.1	105246846	Gm42067	lncRNA	1.1143	4.44833	-1.99712	0.00121801	0.0333441	mmu-miR-214-3p	866.854	544.158	0.66229	0.00013468	0.0046466	XM_006516544.4	140580	Elmo1	transcript	0.964251	0	Inf	0.000820671	0.0276354
NR_168272.1	105246846	Gm42067	lncRNA	1.1143	4.44833	-1.99712	0.00121801	0.0333441	mmu-miR-214-3p	866.854	544.158	0.66229	0.00013468	0.0046466	XM_011239446.4	228026	Pdk1	transcript	3.2763	0	Inf	0.000820671	0.0276354
NR_168272.1	105246846	Gm42067	lncRNA	1.1143	4.44833	-1.99712	0.00121801	0.0333441	mmu-miR-214-3p	866.854	544.158	0.66229	0.00013468	0.0046466	TCONS_00002822	67512	Agpat2	transcript	1.95082	0	Inf	0.000820671	0.0276354
NR_168272.1	105246846	Gm42067	lncRNA	1.1143	4.44833	-1.99712	0.00121801	0.0333441	mmu-miR-214-3p	866.854	544.158	0.66229	0.00013468	0.0046466	NM_175398.4	109050	Inka2	transcript	2.56575	7.08752	-1.4659	0.00255544	0.0482407
NR_168272.1	105246846	Gm42067	lncRNA	1.1143	4.44833	-1.99712	0.00121801	0.0333441	mmu-miR-214-3p	866.854	544.158	0.66229	0.00013468	0.0046466	XM_030249575.2	18607	Pdpk1	transcript	3.59523	0	Inf	2.05e-05	0.0155632
NR_168272.1	105246846	Gm42067	lncRNA	1.1143	4.44833	-1.99712	0.00121801	0.0333441	mmu-miR-214-3p	866.854	544.158	0.66229	0.00013468	0.0046466	NM_001288613.1	245860	Atg9a	transcript	2.10893	0.14069	3.90593	0.000401703	0.0276354
NR_168272.1	105246846	Gm42067	lncRNA	1.1143	4.44833	-1.99712	0.00121801	0.0333441	mmu-miR-214-3p	866.854	544.158	0.66229	0.00013468	0.0046466	TCONS_00015185	14533	Bloc1s1	transcript	4.31854	0	Inf	0.000820671	0.0276354
NR_168272.1	105246846	Gm42067	lncRNA	1.1143	4.44833	-1.99712	0.00121801	0.0333441	mmu-miR-214-3p	866.854	544.158	0.66229	0.00013468	0.0046466	XM_017321605.3	27418	Mkln1	transcript	1.57045	0.0165473	6.56843	0.00103662	0.0304533
NR_168272.1	105246846	Gm42067	lncRNA	1.1143	4.44833	-1.99712	0.00121801	0.0333441	mmu-miR-214-3p	866.854	544.158	0.66229	0.00013468	0.0046466	NM_001310464.1	19699	Reln	transcript	1.91056	0	Inf	9.66e-05	0.0264941
NR_168272.1	105246846	Gm42067	lncRNA	1.1143	4.44833	-1.99712	0.00121801	0.0333441	mmu-miR-214-3p	866.854	544.158	0.66229	0.00013468	0.0046466	XM_036162790.1	19130	Prox1	transcript	1.35014	0.000200667	12.716	2.04e-05	0.0155632
NR_168272.1	105246846	Gm42067	lncRNA	1.1143	4.44833	-1.99712	0.00121801	0.0333441	mmu-miR-214-3p	866.854	544.158	0.66229	0.00013468	0.0046466	XM_036158471.1	15460	Hr	transcript	0	2.40576	#NAME?	0.0021495	0.0436572
NR_168272.1	105246846	Gm42067	lncRNA	1.1143	4.44833	-1.99712	0.00121801	0.0333441	mmu-miR-214-3p	866.854	544.158	0.66229	0.00013468	0.0046466	XM_006517452.5	76577	Faf2	transcript	0.845375	0	Inf	0.000820671	0.0276354
NR_168272.1	105246846	Gm42067	lncRNA	1.1143	4.44833	-1.99712	0.00121801	0.0333441	mmu-miR-214-3p	866.854	544.158	0.66229	0.00013468	0.0046466	NM_177673.2	230967	Cep104	transcript	3.10235	2.01391	0.623361	0.000626734	0.0276354
NR_168272.1	105246846	Gm42067	lncRNA	1.1143	4.44833	-1.99712	0.00121801	0.0333441	mmu-miR-214-3p	866.854	544.158	0.66229	0.00013468	0.0046466	TCONS_00002486	68295	Aar2	transcript	1.18122	0	Inf	0.000820671	0.0276354
NR_168272.1	105246846	Gm42067	lncRNA	1.1143	4.44833	-1.99712	0.00121801	0.0333441	mmu-miR-214-3p	866.854	544.158	0.66229	0.00013468	0.0046466	TCONS_00015789	107476	Acaca	transcript	0.855672	0.031853	4.74756	0.0012857	0.0341943
NR_168272.1	105246846	Gm42067	lncRNA	1.1143	4.44833	-1.99712	0.00121801	0.0333441	mmu-miR-214-3p	866.854	544.158	0.66229	0.00013468	0.0046466	NM_153794.4	108654	Fam210a	transcript	5.80425	4.32633	0.423966	0.000651079	0.0276354
NR_168272.1	105246846	Gm42067	lncRNA	1.1143	4.44833	-1.99712	0.00121801	0.0333441	mmu-miR-214-3p	866.854	544.158	0.66229	0.00013468	0.0046466	TCONS_00024433	73713	Rbm20	transcript	1.35106	0	Inf	0.000820671	0.0276354
NR_168272.1	105246846	Gm42067	lncRNA	1.1143	4.44833	-1.99712	0.00121801	0.0333441	mmu-miR-214-3p	866.854	544.158	0.66229	0.00013468	0.0046466	NM_009088.3	20019	Polr1a	transcript	5.17423	7.65806	-0.565635	0.000892474	0.0287892
NR_168272.1	105246846	Gm42067	lncRNA	1.1143	4.44833	-1.99712	0.00121801	0.0333441	mmu-miR-214-3p	866.854	544.158	0.66229	0.00013468	0.0046466	NM_001163379.1	55979	Agpat1	transcript	14.6579	11.2463	0.382229	0.000825619	0.0277196
NR_168272.1	105246846	Gm42067	lncRNA	1.1143	4.44833	-1.99712	0.00121801	0.0333441	mmu-miR-214-3p	866.854	544.158	0.66229	0.00013468	0.0046466	NM_145447.2	217721	Flvcr2	transcript	2.72949	0.849176	1.6845	0.00015539	0.0276354
NR_168272.1	105246846	Gm42067	lncRNA	1.1143	4.44833	-1.99712	0.00121801	0.0333441	mmu-miR-214-3p	866.854	544.158	0.66229	0.00013468	0.0046466	NM_001359505.1	77521	Mtus2	transcript	30.9488	21.1013	0.552555	0.000558842	0.0276354
NR_168272.1	105246846	Gm42067	lncRNA	1.1143	4.44833	-1.99712	0.00121801	0.0333441	mmu-miR-214-3p	866.854	544.158	0.66229	0.00013468	0.0046466	XM_030255147.2	381290	Atp2b4	transcript	1.79149	0	Inf	0.000233871	0.0276354
NR_168272.1	105246846	Gm42067	lncRNA	1.1143	4.44833	-1.99712	0.00121801	0.0333441	mmu-miR-214-3p	866.854	544.158	0.66229	0.00013468	0.0046466	TCONS_00001035	21961	Tns1	transcript	39.6786	2.46049	4.01134	0.00031257	0.0276354
NR_168272.1	105246846	Gm42067	lncRNA	1.1143	4.44833	-1.99712	0.00121801	0.0333441	mmu-miR-214-3p	866.854	544.158	0.66229	0.00013468	0.0046466	TCONS_00022612	225049	Ttc7	transcript	1.28356	2.38495	-0.893809	1.15e-05	0.0155632
NR_168272.1	105246846	Gm42067	lncRNA	1.1143	4.44833	-1.99712	0.00121801	0.0333441	mmu-miR-214-3p	866.854	544.158	0.66229	0.00013468	0.0046466	NM_011207.2	545622	Ptpn3	transcript	2.85143	0.047324	5.91297	0.000765875	0.0276354
NR_168272.1	105246846	Gm42067	lncRNA	1.1143	4.44833	-1.99712	0.00121801	0.0333441	mmu-miR-214-3p	866.854	544.158	0.66229	0.00013468	0.0046466	XM_036154088.1	319518	Pdpr	transcript	1.61977	3.72043	-1.19968	0.000122455	0.0276354
NR_168272.1	105246846	Gm42067	lncRNA	1.1143	4.44833	-1.99712	0.00121801	0.0333441	mmu-miR-214-3p	866.854	544.158	0.66229	0.00013468	0.0046466	NM_020486.2	57278	Bcam	transcript	97.5158	46.6059	1.06512	0.000167128	0.0276354
NR_168272.1	105246846	Gm42067	lncRNA	1.1143	4.44833	-1.99712	0.00121801	0.0333441	mmu-miR-214-3p	866.854	544.158	0.66229	0.00013468	0.0046466	TCONS_00020016	65246	Xpo7	transcript	4.13029	0.00722533	9.15896	0.00116536	0.0326432
NR_168272.1	105246846	Gm42067	lncRNA	1.1143	4.44833	-1.99712	0.00121801	0.0333441	mmu-miR-214-3p	866.854	544.158	0.66229	0.00013468	0.0046466	NM_009818.1	12385	Ctnna1	transcript	89.2245	90.2244	-0.0160775	0.000857497	0.0281337
NR_168272.1	105246846	Gm42067	lncRNA	1.1143	4.44833	-1.99712	0.00121801	0.0333441	mmu-miR-214-3p	866.854	544.158	0.66229	0.00013468	0.0046466	NM_001347446.1	94089	Trim7	transcript	1.16147	7.15854	-2.62371	0.00045152	0.0276354
NR_168272.1	105246846	Gm42067	lncRNA	1.1143	4.44833	-1.99712	0.00121801	0.0333441	mmu-miR-214-3p	866.854	544.158	0.66229	0.00013468	0.0046466	TCONS_00012153	76808	Rpl18a	transcript	32.7855	0	Inf	2.77e-05	0.0155632
NR_168272.1	105246846	Gm42067	lncRNA	1.1143	4.44833	-1.99712	0.00121801	0.0333441	mmu-miR-214-3p	866.854	544.158	0.66229	0.00013468	0.0046466	XM_006534391.5	75580	Zbtb4	transcript	1.27003	0	Inf	0.000820671	0.0276354
NR_168272.1	105246846	Gm42067	lncRNA	1.1143	4.44833	-1.99712	0.00121801	0.0333441	mmu-miR-214-3p	866.854	544.158	0.66229	0.00013468	0.0046466	NM_054046.5	23854	Def8	transcript	8.18934	6.47494	0.33888	0.0016116	0.037419
NR_168272.1	105246846	Gm42067	lncRNA	1.1143	4.44833	-1.99712	0.00121801	0.0333441	mmu-miR-214-3p	866.854	544.158	0.66229	0.00013468	0.0046466	NM_024288.2	68477	Rmnd5a	transcript	14.9293	15.4847	-0.0526959	0.000690882	0.0276354
NR_168272.1	105246846	Gm42067	lncRNA	1.1143	4.44833	-1.99712	0.00121801	0.0333441	mmu-miR-214-3p	866.854	544.158	0.66229	0.00013468	0.0046466	TCONS_00022295	81877	Tnxb	transcript	1.75426	0	Inf	0.000820671	0.0276354
NR_168272.1	105246846	Gm42067	lncRNA	1.1143	4.44833	-1.99712	0.00121801	0.0333441	mmu-miR-214-3p	866.854	544.158	0.66229	0.00013468	0.0046466	NM_001165902.1	12387	Ctnnb1	transcript	1.01086	0.074119	3.76959	0.000164837	0.0276354
NR_168272.1	105246846	Gm42067	lncRNA	1.1143	4.44833	-1.99712	0.00121801	0.0333441	mmu-miR-214-3p	866.854	544.158	0.66229	0.00013468	0.0046466	NM_008138.5	14678	Gnai2	transcript	64.7581	38.7376	0.741328	0.000133889	0.0276354
NR_168272.1	105246846	Gm42067	lncRNA	1.1143	4.44833	-1.99712	0.00121801	0.0333441	mmu-miR-214-3p	866.854	544.158	0.66229	0.00013468	0.0046466	NM_001169577.1	22214	Ube2h	transcript	1.41218	0.0643033	4.45689	0.00189306	0.0407486
NR_168272.1	105246846	Gm42067	lncRNA	1.1143	4.44833	-1.99712	0.00121801	0.0333441	mmu-miR-214-3p	866.854	544.158	0.66229	0.00013468	0.0046466	NM_170760.3	233073	U2af1l4	transcript	10.7881	11.8091	-0.13046	0.00194872	0.0413468
NR_168272.1	105246846	Gm42067	lncRNA	1.1143	4.44833	-1.99712	0.00121801	0.0333441	mmu-miR-214-3p	866.854	544.158	0.66229	0.00013468	0.0046466	NM_011785.4	23797	Akt3	transcript	1.5986	0.0690953	4.53208	0.0015947	0.037419
NR_168272.1	105246846	Gm42067	lncRNA	1.1143	4.44833	-1.99712	0.00121801	0.0333441	mmu-miR-214-3p	866.854	544.158	0.66229	0.00013468	0.0046466	XM_006521705.3	107589	Mylk	transcript	3.13462	3.83408	-0.290594	0.00265995	0.0492416
NR_168272.1	105246846	Gm42067	lncRNA	1.1143	4.44833	-1.99712	0.00121801	0.0333441	mmu-miR-214-3p	866.854	544.158	0.66229	0.00013468	0.0046466	NM_138591.2	28030	Gfm1	transcript	34.2978	39.8161	-0.215235	0.00123449	0.0335637
NR_168272.1	105246846	Gm42067	lncRNA	1.1143	4.44833	-1.99712	0.00121801	0.0333441	mmu-miR-214-3p	866.854	544.158	0.66229	0.00013468	0.0046466	TCONS_00005210	21687	Tek	transcript	2.18464	0	Inf	0.000820671	0.0276354
NR_168272.1	105246846	Gm42067	lncRNA	1.1143	4.44833	-1.99712	0.00121801	0.0333441	mmu-miR-214-3p	866.854	544.158	0.66229	0.00013468	0.0046466	NM_053009.3	109910	Zfp91	transcript	24.0255	23.1627	0.0527611	0.000930839	0.0292165
NR_168272.1	105246846	Gm42067	lncRNA	1.1143	4.44833	-1.99712	0.00121801	0.0333441	mmu-miR-214-3p	866.854	544.158	0.66229	0.00013468	0.0046466	NM_024214.2	67952	Tomm20	transcript	10.2066	7.84903	0.378922	0.000773909	0.0276354
NR_168272.1	105246846	Gm42067	lncRNA	1.1143	4.44833	-1.99712	0.00121801	0.0333441	mmu-miR-214-3p	866.854	544.158	0.66229	0.00013468	0.0046466	NM_001012477.2	20315	Cxcl12	transcript	8.72303	23.6765	-1.44055	0.000741939	0.0276354
NR_168272.1	105246846	Gm42067	lncRNA	1.1143	4.44833	-1.99712	0.00121801	0.0333441	mmu-miR-214-3p	866.854	544.158	0.66229	0.00013468	0.0046466	NM_001013024.2	72607	Usp13	transcript	43.9871	44.7173	-0.0237507	0.000631592	0.0276354
NR_168272.1	105246846	Gm42067	lncRNA	1.1143	4.44833	-1.99712	0.00121801	0.0333441	mmu-miR-214-3p	866.854	544.158	0.66229	0.00013468	0.0046466	XM_030250848.1	228998	Arfgap1	transcript	1.08784	0	Inf	0.000820671	0.0276354
NR_168272.1	105246846	Gm42067	lncRNA	1.1143	4.44833	-1.99712	0.00121801	0.0333441	mmu-miR-214-3p	866.854	544.158	0.66229	0.00013468	0.0046466	NM_001081979.2	17257	Mecp2	transcript	3.25013	3.79955	-0.22533	0.000372863	0.0276354
NR_168272.1	105246846	Gm42067	lncRNA	1.1143	4.44833	-1.99712	0.00121801	0.0333441	mmu-miR-214-3p	866.854	544.158	0.66229	0.00013468	0.0046466	NM_053159.4	94062	Mrpl3	transcript	20.8991	24.078	-0.204272	1.09e-05	0.0155632
NR_168272.1	105246846	Gm42067	lncRNA	1.1143	4.44833	-1.99712	0.00121801	0.0333441	mmu-miR-214-3p	866.854	544.158	0.66229	0.00013468	0.0046466	NM_001253757.1	66471	Anp32e	transcript	1.72974	1.29992	0.412137	0.00160311	0.037419
NR_168272.1	105246846	Gm42067	lncRNA	1.1143	4.44833	-1.99712	0.00121801	0.0333441	mmu-miR-214-3p	866.854	544.158	0.66229	0.00013468	0.0046466	NM_133808.5	110611	Hdlbp	transcript	60.027	71.0376	-0.242973	0.00219802	0.0438821
NR_168272.1	105246846	Gm42067	lncRNA	1.1143	4.44833	-1.99712	0.00121801	0.0333441	mmu-miR-214-3p	866.854	544.158	0.66229	0.00013468	0.0046466	NM_001360132.1	20130	Rras	transcript	1.46932	0	Inf	0.000820671	0.0276354
NR_168272.1	105246846	Gm42067	lncRNA	1.1143	4.44833	-1.99712	0.00121801	0.0333441	mmu-miR-214-3p	866.854	544.158	0.66229	0.00013468	0.0046466	XM_036165784.1	12321	Calu	transcript	10.5439	16.3948	-0.636826	0.00157708	0.0372453
NR_168272.1	105246846	Gm42067	lncRNA	1.1143	4.44833	-1.99712	0.00121801	0.0333441	mmu-miR-214-3p	866.854	544.158	0.66229	0.00013468	0.0046466	XM_006530878.1	234595	Slc38a7	transcript	0.923806	0.0383027	4.59207	3.17e-05	0.0155632
NR_168272.1	105246846	Gm42067	lncRNA	1.1143	4.44833	-1.99712	0.00121801	0.0333441	mmu-miR-214-3p	866.854	544.158	0.66229	0.00013468	0.0046466	TCONS_00020910	223697	Sun2	transcript	2.54478	0	Inf	0.000820671	0.0276354
NR_168272.1	105246846	Gm42067	lncRNA	1.1143	4.44833	-1.99712	0.00121801	0.0333441	mmu-miR-214-3p	866.854	544.158	0.66229	0.00013468	0.0046466	NM_010489.2	15587	Hyal2	transcript	3.40604	0.443805	2.94009	0.00142619	0.0355126
NR_168272.1	105246846	Gm42067	lncRNA	1.1143	4.44833	-1.99712	0.00121801	0.0333441	mmu-miR-214-3p	866.854	544.158	0.66229	0.00013468	0.0046466	NM_024454.1	216344	Rab21	transcript	0.620409	17.8734	-4.84845	0.000508496	0.0276354
NR_168272.1	105246846	Gm42067	lncRNA	1.1143	4.44833	-1.99712	0.00121801	0.0333441	mmu-miR-214-3p	866.854	544.158	0.66229	0.00013468	0.0046466	NM_001252638.1	69288	Rhobtb1	transcript	0.0385657	2.18074	-5.82136	0.00249007	0.0476339
NR_168272.1	105246846	Gm42067	lncRNA	1.1143	4.44833	-1.99712	0.00121801	0.0333441	mmu-miR-214-3p	866.854	544.158	0.66229	0.00013468	0.0046466	NM_177059.3	320027	Fstl4	transcript	2.66003	0	Inf	0.00041668	0.0276354
NR_168272.1	105246846	Gm42067	lncRNA	1.1143	4.44833	-1.99712	0.00121801	0.0333441	mmu-miR-214-3p	866.854	544.158	0.66229	0.00013468	0.0046466	NM_009634.6	11564	Adsl	transcript	8.39214	7.60029	0.142984	0.000689457	0.0276354
NR_168272.1	105246846	Gm42067	lncRNA	1.1143	4.44833	-1.99712	0.00121801	0.0333441	mmu-miR-214-3p	866.854	544.158	0.66229	0.00013468	0.0046466	XM_006522138.4	252870	Usp7	transcript	1.00697	0	Inf	0.000820671	0.0276354
NR_168272.1	105246846	Gm42067	lncRNA	1.1143	4.44833	-1.99712	0.00121801	0.0333441	mmu-miR-214-3p	866.854	544.158	0.66229	0.00013468	0.0046466	TCONS_00023376	19290	Pura	transcript	2.15409	0.008678	7.9555	0.00096005	0.0297987
NR_168272.1	105246846	Gm42067	lncRNA	1.1143	4.44833	-1.99712	0.00121801	0.0333441	mmu-miR-214-3p	866.854	544.158	0.66229	0.00013468	0.0046466	TCONS_00017162	11430	Acox1	transcript	12.213	0.001165	13.3558	0.000790298	0.0276354
NR_168272.1	105246846	Gm42067	lncRNA	1.1143	4.44833	-1.99712	0.00121801	0.0333441	mmu-miR-214-3p	866.854	544.158	0.66229	0.00013468	0.0046466	XM_006515925.4	26932	Ppp2r5e	transcript	1.17794	0.258766	2.18654	0.000952025	0.0296311
NR_168272.1	105246846	Gm42067	lncRNA	1.1143	4.44833	-1.99712	0.00121801	0.0333441	mmu-miR-214-3p	866.854	544.158	0.66229	0.00013468	0.0046466	NM_029573.2	67834	Idh3a	transcript	102.21	117.679	-0.203314	0.000977083	0.0298464
NR_168272.1	105246846	Gm42067	lncRNA	1.1143	4.44833	-1.99712	0.00121801	0.0333441	mmu-miR-214-3p	866.854	544.158	0.66229	0.00013468	0.0046466	NM_018743.4	102247	Gpat4	transcript	7.76624	6.97285	0.155467	0.00132739	0.0345061
NR_168272.1	105246846	Gm42067	lncRNA	1.1143	4.44833	-1.99712	0.00121801	0.0333441	mmu-miR-214-3p	866.854	544.158	0.66229	0.00013468	0.0046466	NM_027558.1	70804	Pgrmc2	transcript	13.5548	8.47909	0.676825	0.000359363	0.0276354
NR_168272.1	105246846	Gm42067	lncRNA	1.1143	4.44833	-1.99712	0.00121801	0.0333441	mmu-miR-214-3p	866.854	544.158	0.66229	0.00013468	0.0046466	NM_008681.2	17988	Ndrg1	transcript	13.4879	7.27813	0.890022	0.00249471	0.0476436
TCONS_00023682	12558	Cdh2	lncRNA	5.50214	3.05558	0.848547	0.00218381	0.0438821	mmu-miR-214-3p	866.854	544.158	0.66229	0.00013468	0.0046466	XM_006519358.3	65107	Lrp10	transcript	2.10967	0.25084	3.07218	0.00255949	0.0482407
TCONS_00023682	12558	Cdh2	lncRNA	5.50214	3.05558	0.848547	0.00218381	0.0438821	mmu-miR-214-3p	866.854	544.158	0.66229	0.00013468	0.0046466	TCONS_00004132	229663	Csde1	transcript	48.2189	63.0905	-0.387826	0.0012973	0.0342571
TCONS_00023682	12558	Cdh2	lncRNA	5.50214	3.05558	0.848547	0.00218381	0.0438821	mmu-miR-214-3p	866.854	544.158	0.66229	0.00013468	0.0046466	NM_007395.4	11479	Acvr1b	transcript	6.46432	3.77857	0.774661	0.000388991	0.0276354
TCONS_00023682	12558	Cdh2	lncRNA	5.50214	3.05558	0.848547	0.00218381	0.0438821	mmu-miR-214-3p	866.854	544.158	0.66229	0.00013468	0.0046466	TCONS_00022043	20656	Sod2	transcript	6.07359	0.19545	4.95768	0.0002461	0.0276354
TCONS_00023682	12558	Cdh2	lncRNA	5.50214	3.05558	0.848547	0.00218381	0.0438821	mmu-miR-214-3p	866.854	544.158	0.66229	0.00013468	0.0046466	NM_001013390.3	399548	Scn4b	transcript	2.15251	16.2847	-2.91942	0.00111032	0.0316263
TCONS_00023682	12558	Cdh2	lncRNA	5.50214	3.05558	0.848547	0.00218381	0.0438821	mmu-miR-214-3p	866.854	544.158	0.66229	0.00013468	0.0046466	XM_006503677.4	11518	Add1	transcript	1.28784	0.00563833	7.83547	0.000849239	0.028103
TCONS_00023682	12558	Cdh2	lncRNA	5.50214	3.05558	0.848547	0.00218381	0.0438821	mmu-miR-214-3p	866.854	544.158	0.66229	0.00013468	0.0046466	NM_001077184.1	12215	Bsg	transcript	229.288	397.283	-0.793008	0.0014193	0.0355126
TCONS_00023682	12558	Cdh2	lncRNA	5.50214	3.05558	0.848547	0.00218381	0.0438821	mmu-miR-214-3p	866.854	544.158	0.66229	0.00013468	0.0046466	XM_006507175.4	101706	Numa1	transcript	2.05864	1.25498	0.714031	0.00217807	0.0438821
TCONS_00023682	12558	Cdh2	lncRNA	5.50214	3.05558	0.848547	0.00218381	0.0438821	mmu-miR-214-3p	866.854	544.158	0.66229	0.00013468	0.0046466	XM_006538665.4	192185	Nadk	transcript	0.972007	0.0104583	6.53824	0.00196035	0.0413468
TCONS_00023682	12558	Cdh2	lncRNA	5.50214	3.05558	0.848547	0.00218381	0.0438821	mmu-miR-214-3p	866.854	544.158	0.66229	0.00013468	0.0046466	NM_026524.4	68041	Mid1ip1	transcript	37.9267	30.3802	0.320079	0.000987289	0.0299274
TCONS_00023682	12558	Cdh2	lncRNA	5.50214	3.05558	0.848547	0.00218381	0.0438821	mmu-miR-214-3p	866.854	544.158	0.66229	0.00013468	0.0046466	XM_036157952.1	12908	Crat	transcript	3.05654	0	Inf	5.87e-05	0.0211184
TCONS_00023682	12558	Cdh2	lncRNA	5.50214	3.05558	0.848547	0.00218381	0.0438821	mmu-miR-214-3p	866.854	544.158	0.66229	0.00013468	0.0046466	NM_011293.2	20022	Polr2j	transcript	13.2814	15.4381	-0.217088	0.000690938	0.0276354
TCONS_00023682	12558	Cdh2	lncRNA	5.50214	3.05558	0.848547	0.00218381	0.0438821	mmu-miR-214-3p	866.854	544.158	0.66229	0.00013468	0.0046466	NM_013799.3	11907	Ate1	transcript	1.05172	0.261099	2.01008	0.0019568	0.0413468
TCONS_00023682	12558	Cdh2	lncRNA	5.50214	3.05558	0.848547	0.00218381	0.0438821	mmu-miR-214-3p	866.854	544.158	0.66229	0.00013468	0.0046466	NM_022032.4	64058	Perp	transcript	119.731	36.8542	1.6999	0.00103486	0.0304533
TCONS_00023682	12558	Cdh2	lncRNA	5.50214	3.05558	0.848547	0.00218381	0.0438821	mmu-miR-214-3p	866.854	544.158	0.66229	0.00013468	0.0046466	NM_130449.2	140792	Colec12	transcript	3.99678	3.31964	0.26781	0.00250276	0.0477182
TCONS_00023682	12558	Cdh2	lncRNA	5.50214	3.05558	0.848547	0.00218381	0.0438821	mmu-miR-214-3p	866.854	544.158	0.66229	0.00013468	0.0046466	NM_020332.4	11732	Ank	transcript	34.408	47.7049	-0.471394	9.3e-06	0.0155632
TCONS_00023682	12558	Cdh2	lncRNA	5.50214	3.05558	0.848547	0.00218381	0.0438821	mmu-miR-214-3p	866.854	544.158	0.66229	0.00013468	0.0046466	NM_146243.2	66713	Actr2	transcript	29.0525	22.8911	0.343875	0.00149481	0.0362404
TCONS_00023682	12558	Cdh2	lncRNA	5.50214	3.05558	0.848547	0.00218381	0.0438821	mmu-miR-214-3p	866.854	544.158	0.66229	0.00013468	0.0046466	NM_145605.2	234825	Klhdc4	transcript	1.15389	3.19303	-1.46842	0.000484263	0.0276354
TCONS_00023682	12558	Cdh2	lncRNA	5.50214	3.05558	0.848547	0.00218381	0.0438821	mmu-miR-214-3p	866.854	544.158	0.66229	0.00013468	0.0046466	NM_009128.2	20250	Scd2	transcript	5.03621	2.28079	1.14281	0.00036858	0.0276354
TCONS_00023682	12558	Cdh2	lncRNA	5.50214	3.05558	0.848547	0.00218381	0.0438821	mmu-miR-214-3p	866.854	544.158	0.66229	0.00013468	0.0046466	NM_146169.2	232164	Paip2b	transcript	8.94612	8.43108	0.0855459	0.00119144	0.0329033
TCONS_00023682	12558	Cdh2	lncRNA	5.50214	3.05558	0.848547	0.00218381	0.0438821	mmu-miR-214-3p	866.854	544.158	0.66229	0.00013468	0.0046466	TCONS_00025423	66158	Rtl8a	transcript	1.29636	0	Inf	0.000820671	0.0276354
TCONS_00023682	12558	Cdh2	lncRNA	5.50214	3.05558	0.848547	0.00218381	0.0438821	mmu-miR-214-3p	866.854	544.158	0.66229	0.00013468	0.0046466	NM_007616.4	12389	Cav1	transcript	43.4254	41.8983	0.0516465	0.000217852	0.0276354
TCONS_00023682	12558	Cdh2	lncRNA	5.50214	3.05558	0.848547	0.00218381	0.0438821	mmu-miR-214-3p	866.854	544.158	0.66229	0.00013468	0.0046466	XM_036157306.1	217463	Snx13	transcript	1.9793	0	Inf	0.000820671	0.0276354
TCONS_00023682	12558	Cdh2	lncRNA	5.50214	3.05558	0.848547	0.00218381	0.0438821	mmu-miR-214-3p	866.854	544.158	0.66229	0.00013468	0.0046466	XM_036162479.1	66691	Gapvd1	transcript	0.923883	0.00617833	7.22435	0.00246229	0.0472596
TCONS_00023682	12558	Cdh2	lncRNA	5.50214	3.05558	0.848547	0.00218381	0.0438821	mmu-miR-214-3p	866.854	544.158	0.66229	0.00013468	0.0046466	NM_026919.1	69038	Tmem258	transcript	30.5924	45.4779	-0.571991	0.00175494	0.0386422
TCONS_00023682	12558	Cdh2	lncRNA	5.50214	3.05558	0.848547	0.00218381	0.0438821	mmu-miR-214-3p	866.854	544.158	0.66229	0.00013468	0.0046466	TCONS_00019782	50527	Ero1a	transcript	1.12978	0	Inf	0.000820671	0.0276354
TCONS_00023682	12558	Cdh2	lncRNA	5.50214	3.05558	0.848547	0.00218381	0.0438821	mmu-miR-214-3p	866.854	544.158	0.66229	0.00013468	0.0046466	TCONS_00000691	320404	Itpkb	transcript	2.74831	0	Inf	0.00022582	0.0276354
TCONS_00023682	12558	Cdh2	lncRNA	5.50214	3.05558	0.848547	0.00218381	0.0438821	mmu-miR-214-3p	866.854	544.158	0.66229	0.00013468	0.0046466	XM_011246234.2	106522	Pkdcc	transcript	0.975937	0	Inf	0.000820671	0.0276354
TCONS_00023682	12558	Cdh2	lncRNA	5.50214	3.05558	0.848547	0.00218381	0.0438821	mmu-miR-214-3p	866.854	544.158	0.66229	0.00013468	0.0046466	XM_006517134.5	18193	Nsd1	transcript	1.9852	0.448937	2.1447	0.00060106	0.0276354
TCONS_00023682	12558	Cdh2	lncRNA	5.50214	3.05558	0.848547	0.00218381	0.0438821	mmu-miR-214-3p	866.854	544.158	0.66229	0.00013468	0.0046466	NM_010633.4	16589	Uhmk1	transcript	7.61792	5.62359	0.437905	0.00058092	0.0276354
TCONS_00023682	12558	Cdh2	lncRNA	5.50214	3.05558	0.848547	0.00218381	0.0438821	mmu-miR-214-3p	866.854	544.158	0.66229	0.00013468	0.0046466	NM_016709.2	11992	Auh	transcript	23.1108	25.9264	-0.165855	0.00124159	0.0335637
TCONS_00023682	12558	Cdh2	lncRNA	5.50214	3.05558	0.848547	0.00218381	0.0438821	mmu-miR-214-3p	866.854	544.158	0.66229	0.00013468	0.0046466	XM_030246370.1	72729	Cdc42se2	transcript	1.75393	0.133176	3.71919	3e-05	0.0155632
TCONS_00023682	12558	Cdh2	lncRNA	5.50214	3.05558	0.848547	0.00218381	0.0438821	mmu-miR-214-3p	866.854	544.158	0.66229	0.00013468	0.0046466	XM_006504490.4	66711	Sbds	transcript	5.04204	0.162342	4.9569	0.000582299	0.0276354
TCONS_00023682	12558	Cdh2	lncRNA	5.50214	3.05558	0.848547	0.00218381	0.0438821	mmu-miR-214-3p	866.854	544.158	0.66229	0.00013468	0.0046466	NM_027859.3	71673	Rnf215	transcript	2.26533	2.64791	-0.22513	0.00109052	0.0314747
TCONS_00023682	12558	Cdh2	lncRNA	5.50214	3.05558	0.848547	0.00218381	0.0438821	mmu-miR-214-3p	866.854	544.158	0.66229	0.00013468	0.0046466	TCONS_00017675	68519	Eml1	transcript	11.0496	10.9045	0.0190772	0.00239943	0.0465183
TCONS_00023682	12558	Cdh2	lncRNA	5.50214	3.05558	0.848547	0.00218381	0.0438821	mmu-miR-214-3p	866.854	544.158	0.66229	0.00013468	0.0046466	NM_177411.4	19344	Rab5b	transcript	15.3906	17.862	-0.214852	0.000321654	0.0276354
TCONS_00023682	12558	Cdh2	lncRNA	5.50214	3.05558	0.848547	0.00218381	0.0438821	mmu-miR-214-3p	866.854	544.158	0.66229	0.00013468	0.0046466	TCONS_00025632	14605	Tsc22d3	transcript	6.76223	7.56572	-0.161979	0.00193513	0.0411922
TCONS_00023682	12558	Cdh2	lncRNA	5.50214	3.05558	0.848547	0.00218381	0.0438821	mmu-miR-214-3p	866.854	544.158	0.66229	0.00013468	0.0046466	XM_030248555.2	239555	Mief1	transcript	1.40417	0.071697	4.29166	0.00216897	0.0438208
TCONS_00023682	12558	Cdh2	lncRNA	5.50214	3.05558	0.848547	0.00218381	0.0438821	mmu-miR-214-3p	866.854	544.158	0.66229	0.00013468	0.0046466	TCONS_00011889	16337	Insr	transcript	3.80413	0	Inf	3.51e-05	0.0155632
TCONS_00023682	12558	Cdh2	lncRNA	5.50214	3.05558	0.848547	0.00218381	0.0438821	mmu-miR-214-3p	866.854	544.158	0.66229	0.00013468	0.0046466	TCONS_00023739	76594	Dnajc18	transcript	1.93372	0	Inf	0.000820671	0.0276354
TCONS_00023682	12558	Cdh2	lncRNA	5.50214	3.05558	0.848547	0.00218381	0.0438821	mmu-miR-214-3p	866.854	544.158	0.66229	0.00013468	0.0046466	NM_145929.2	106039	Gga1	transcript	10.8709	8.79062	0.306438	0.0015586	0.0372453
TCONS_00023682	12558	Cdh2	lncRNA	5.50214	3.05558	0.848547	0.00218381	0.0438821	mmu-miR-214-3p	866.854	544.158	0.66229	0.00013468	0.0046466	TCONS_00001258	116847	Prelp	transcript	1.45639	0	Inf	0.000820671	0.0276354
TCONS_00023682	12558	Cdh2	lncRNA	5.50214	3.05558	0.848547	0.00218381	0.0438821	mmu-miR-214-3p	866.854	544.158	0.66229	0.00013468	0.0046466	NM_019774.5	56399	Akap8	transcript	4.41498	4.61893	-0.0651514	0.0020109	0.0420282
TCONS_00023682	12558	Cdh2	lncRNA	5.50214	3.05558	0.848547	0.00218381	0.0438821	mmu-miR-214-3p	866.854	544.158	0.66229	0.00013468	0.0046466	NM_001017429.2	12856	Cox17	transcript	100.01	129.573	-0.373622	0.00264968	0.0491363
TCONS_00023682	12558	Cdh2	lncRNA	5.50214	3.05558	0.848547	0.00218381	0.0438821	mmu-miR-214-3p	866.854	544.158	0.66229	0.00013468	0.0046466	XM_011245351.4	223455	Marchf6	transcript	4.21198	0.316444	3.73447	0.00123918	0.0335637
TCONS_00023682	12558	Cdh2	lncRNA	5.50214	3.05558	0.848547	0.00218381	0.0438821	mmu-miR-214-3p	866.854	544.158	0.66229	0.00013468	0.0046466	NM_019764.2	56332	Amotl2	transcript	14.284	9.48432	0.590781	0.000290535	0.0276354
TCONS_00023682	12558	Cdh2	lncRNA	5.50214	3.05558	0.848547	0.00218381	0.0438821	mmu-miR-214-3p	866.854	544.158	0.66229	0.00013468	0.0046466	NM_133831.3	68077	Nop53	transcript	25.343	23.991	0.0790944	0.000321251	0.0276354
TCONS_00023682	12558	Cdh2	lncRNA	5.50214	3.05558	0.848547	0.00218381	0.0438821	mmu-miR-214-3p	866.854	544.158	0.66229	0.00013468	0.0046466	NM_009776.3	12258	Serping1	transcript	16.347	19.022	-0.218642	0.000205943	0.0276354
TCONS_00023682	12558	Cdh2	lncRNA	5.50214	3.05558	0.848547	0.00218381	0.0438821	mmu-miR-214-3p	866.854	544.158	0.66229	0.00013468	0.0046466	NM_011838.4	23936	Lynx1	transcript	25.7672	40.3626	-0.647487	0.000722116	0.0276354
TCONS_00023682	12558	Cdh2	lncRNA	5.50214	3.05558	0.848547	0.00218381	0.0438821	mmu-miR-214-3p	866.854	544.158	0.66229	0.00013468	0.0046466	NM_011435.3	20657	Sod3	transcript	6.60321	9.08811	-0.460813	0.00117059	0.0326432
TCONS_00023682	12558	Cdh2	lncRNA	5.50214	3.05558	0.848547	0.00218381	0.0438821	mmu-miR-214-3p	866.854	544.158	0.66229	0.00013468	0.0046466	XM_030250546.2	56386	B4galt6	transcript	1.70533	0.00590867	8.17301	0.00086113	0.0281727
TCONS_00023682	12558	Cdh2	lncRNA	5.50214	3.05558	0.848547	0.00218381	0.0438821	mmu-miR-214-3p	866.854	544.158	0.66229	0.00013468	0.0046466	XM_030243724.1	80914	Uck2	transcript	2.38203	0.0179517	7.05193	0.000395132	0.0276354
TCONS_00023682	12558	Cdh2	lncRNA	5.50214	3.05558	0.848547	0.00218381	0.0438821	mmu-miR-214-3p	866.854	544.158	0.66229	0.00013468	0.0046466	NM_008828.3	18655	Pgk1	transcript	83.217	79.3525	0.068602	0.00229255	0.0452466
TCONS_00023682	12558	Cdh2	lncRNA	5.50214	3.05558	0.848547	0.00218381	0.0438821	mmu-miR-214-3p	866.854	544.158	0.66229	0.00013468	0.0046466	XM_036161354.1	228602	4930402H24Rik	transcript	1.31164	0.00155	9.72489	8.14e-05	0.0253471
TCONS_00023682	12558	Cdh2	lncRNA	5.50214	3.05558	0.848547	0.00218381	0.0438821	mmu-miR-214-3p	866.854	544.158	0.66229	0.00013468	0.0046466	NM_029182.1	75141	Rasd2	transcript	5.28095	1.10421	2.25778	0.00103307	0.0304533
TCONS_00023682	12558	Cdh2	lncRNA	5.50214	3.05558	0.848547	0.00218381	0.0438821	mmu-miR-214-3p	866.854	544.158	0.66229	0.00013468	0.0046466	NM_173735.3	217732	Cipc	transcript	2.22002	0.086604	4.68	0.000543181	0.0276354
TCONS_00023682	12558	Cdh2	lncRNA	5.50214	3.05558	0.848547	0.00218381	0.0438821	mmu-miR-214-3p	866.854	544.158	0.66229	0.00013468	0.0046466	NM_010385.2	14976	Pfdn6	transcript	13.2552	17.8863	-0.4323	0.00108699	0.0314517
TCONS_00023682	12558	Cdh2	lncRNA	5.50214	3.05558	0.848547	0.00218381	0.0438821	mmu-miR-214-3p	866.854	544.158	0.66229	0.00013468	0.0046466	NM_001161420.1	22359	Vldlr	transcript	2.8505	7.64704	-1.42369	0.000891982	0.0287892
TCONS_00023682	12558	Cdh2	lncRNA	5.50214	3.05558	0.848547	0.00218381	0.0438821	mmu-miR-214-3p	866.854	544.158	0.66229	0.00013468	0.0046466	NM_008688.3	18029	Nfic	transcript	4.59623	14.0914	-1.61629	0.00200236	0.0419257
TCONS_00023682	12558	Cdh2	lncRNA	5.50214	3.05558	0.848547	0.00218381	0.0438821	mmu-miR-214-3p	866.854	544.158	0.66229	0.00013468	0.0046466	NM_008338.4	15980	Ifngr2	transcript	40.1831	60.2437	-0.584221	7.98e-05	0.0253471
TCONS_00023682	12558	Cdh2	lncRNA	5.50214	3.05558	0.848547	0.00218381	0.0438821	mmu-miR-214-3p	866.854	544.158	0.66229	0.00013468	0.0046466	NM_001115132.2	52683	Ncaph2	transcript	3.1926	0.540685	2.56187	0.00108613	0.0314517
TCONS_00023682	12558	Cdh2	lncRNA	5.50214	3.05558	0.848547	0.00218381	0.0438821	mmu-miR-214-3p	866.854	544.158	0.66229	0.00013468	0.0046466	NM_021284.6	16653	Kras	transcript	6.68577	7.24422	-0.115735	0.000780807	0.0276354
TCONS_00023682	12558	Cdh2	lncRNA	5.50214	3.05558	0.848547	0.00218381	0.0438821	mmu-miR-214-3p	866.854	544.158	0.66229	0.00013468	0.0046466	NM_025407.2	22273	Uqcrc1	transcript	305.19	377.485	-0.306711	0.000478795	0.0276354
TCONS_00023682	12558	Cdh2	lncRNA	5.50214	3.05558	0.848547	0.00218381	0.0438821	mmu-miR-214-3p	866.854	544.158	0.66229	0.00013468	0.0046466	XM_030245515.2	12808	Cobl	transcript	1.22489	0.014136	6.43713	0.000731975	0.0276354
TCONS_00023682	12558	Cdh2	lncRNA	5.50214	3.05558	0.848547	0.00218381	0.0438821	mmu-miR-214-3p	866.854	544.158	0.66229	0.00013468	0.0046466	NM_175236.5	76187	Adhfe1	transcript	5.22125	5.88058	-0.171562	0.00131045	0.0342571
TCONS_00023682	12558	Cdh2	lncRNA	5.50214	3.05558	0.848547	0.00218381	0.0438821	mmu-miR-214-3p	866.854	544.158	0.66229	0.00013468	0.0046466	NM_197990.3	69399	1700025G04Rik	transcript	6.52172	2.62541	1.31271	0.000479421	0.0276354
TCONS_00023682	12558	Cdh2	lncRNA	5.50214	3.05558	0.848547	0.00218381	0.0438821	mmu-miR-214-3p	866.854	544.158	0.66229	0.00013468	0.0046466	NM_133664.3	16763	Lad1	transcript	2.17237	0.171618	3.662	0.000206847	0.0276354
TCONS_00023682	12558	Cdh2	lncRNA	5.50214	3.05558	0.848547	0.00218381	0.0438821	mmu-miR-214-3p	866.854	544.158	0.66229	0.00013468	0.0046466	NM_198013.3	103841	Cuedc1	transcript	9.33807	8.4224	0.148893	0.0015783	0.0372453
TCONS_00023682	12558	Cdh2	lncRNA	5.50214	3.05558	0.848547	0.00218381	0.0438821	mmu-miR-214-3p	866.854	544.158	0.66229	0.00013468	0.0046466	NM_001110844.1	12293	Cacna2d1	transcript	0.631283	4.45131	-2.81787	0.000493731	0.0276354
TCONS_00023682	12558	Cdh2	lncRNA	5.50214	3.05558	0.848547	0.00218381	0.0438821	mmu-miR-214-3p	866.854	544.158	0.66229	0.00013468	0.0046466	NM_146193.2	83962	Btbd1	transcript	36.2804	34.6035	0.0682754	0.00168654	0.0382088
TCONS_00023682	12558	Cdh2	lncRNA	5.50214	3.05558	0.848547	0.00218381	0.0438821	mmu-miR-214-3p	866.854	544.158	0.66229	0.00013468	0.0046466	NM_001355651.1	74182	Gpcpd1	transcript	1.98661	0.186929	3.40975	0.00197354	0.041549
TCONS_00023682	12558	Cdh2	lncRNA	5.50214	3.05558	0.848547	0.00218381	0.0438821	mmu-miR-214-3p	866.854	544.158	0.66229	0.00013468	0.0046466	TCONS_00022742	30957	Mapk8ip3	transcript	0.033413	2.79614	-6.38688	0.000274522	0.0276354
TCONS_00023682	12558	Cdh2	lncRNA	5.50214	3.05558	0.848547	0.00218381	0.0438821	mmu-miR-214-3p	866.854	544.158	0.66229	0.00013468	0.0046466	NM_025828.3	66890	Lman2	transcript	13.183	13.5281	-0.0372866	0.00183952	0.0400109
TCONS_00023682	12558	Cdh2	lncRNA	5.50214	3.05558	0.848547	0.00218381	0.0438821	mmu-miR-214-3p	866.854	544.158	0.66229	0.00013468	0.0046466	NM_019694.2	56384	Letm1	transcript	5.73717	11.2145	-0.966953	0.000238425	0.0276354
TCONS_00023682	12558	Cdh2	lncRNA	5.50214	3.05558	0.848547	0.00218381	0.0438821	mmu-miR-214-3p	866.854	544.158	0.66229	0.00013468	0.0046466	NM_011908.2	24109	Ubl3	transcript	7.77652	18.8816	-1.27979	2.2e-05	0.0155632
TCONS_00023682	12558	Cdh2	lncRNA	5.50214	3.05558	0.848547	0.00218381	0.0438821	mmu-miR-214-3p	866.854	544.158	0.66229	0.00013468	0.0046466	NM_001164191.1	17772	Mtm1	transcript	4.86962	4.57993	0.0884856	0.00244339	0.0472115
TCONS_00023682	12558	Cdh2	lncRNA	5.50214	3.05558	0.848547	0.00218381	0.0438821	mmu-miR-214-3p	866.854	544.158	0.66229	0.00013468	0.0046466	NM_001289702.1	83679	Pde4dip	transcript	26.0448	32.6548	-0.326299	0.00157065	0.0372453
TCONS_00023682	12558	Cdh2	lncRNA	5.50214	3.05558	0.848547	0.00218381	0.0438821	mmu-miR-214-3p	866.854	544.158	0.66229	0.00013468	0.0046466	XM_036161998.1	241694	Ralgapa2	transcript	4.94291	0.169671	4.86455	0.000222044	0.0276354
TCONS_00023682	12558	Cdh2	lncRNA	5.50214	3.05558	0.848547	0.00218381	0.0438821	mmu-miR-214-3p	866.854	544.158	0.66229	0.00013468	0.0046466	XM_036156454.1	19345	Rab5c	transcript	1.04576	0	Inf	0.000756013	0.0276354
TCONS_00023682	12558	Cdh2	lncRNA	5.50214	3.05558	0.848547	0.00218381	0.0438821	mmu-miR-214-3p	866.854	544.158	0.66229	0.00013468	0.0046466	XM_036155419.1	84585	Rnf123	transcript	0.992394	0.075402	3.71824	0.00019691	0.0276354
TCONS_00023682	12558	Cdh2	lncRNA	5.50214	3.05558	0.848547	0.00218381	0.0438821	mmu-miR-214-3p	866.854	544.158	0.66229	0.00013468	0.0046466	NM_028771.3	52132	Ccdc97	transcript	0.353089	5.23544	-3.89021	0.000248656	0.0276354
TCONS_00023682	12558	Cdh2	lncRNA	5.50214	3.05558	0.848547	0.00218381	0.0438821	mmu-miR-214-3p	866.854	544.158	0.66229	0.00013468	0.0046466	TCONS_00007852	59008	Anapc5	transcript	3.69736	0	Inf	0.000820671	0.0276354
TCONS_00023682	12558	Cdh2	lncRNA	5.50214	3.05558	0.848547	0.00218381	0.0438821	mmu-miR-214-3p	866.854	544.158	0.66229	0.00013468	0.0046466	TCONS_00020139	16880	Lifr	transcript	1.30271	0	Inf	0.000820671	0.0276354
TCONS_00023682	12558	Cdh2	lncRNA	5.50214	3.05558	0.848547	0.00218381	0.0438821	mmu-miR-214-3p	866.854	544.158	0.66229	0.00013468	0.0046466	NM_178253.5	271005	Klhdc1	transcript	4.29811	8.4043	-0.967424	0.000211255	0.0276354
TCONS_00023682	12558	Cdh2	lncRNA	5.50214	3.05558	0.848547	0.00218381	0.0438821	mmu-miR-214-3p	866.854	544.158	0.66229	0.00013468	0.0046466	NM_175523.5	243382	Ppm1k	transcript	41.3824	25.3879	0.704875	0.000348613	0.0276354
TCONS_00023682	12558	Cdh2	lncRNA	5.50214	3.05558	0.848547	0.00218381	0.0438821	mmu-miR-214-3p	866.854	544.158	0.66229	0.00013468	0.0046466	NM_026275.4	67615	Ube2r2	transcript	5.99431	0.341337	4.13433	0.000853945	0.0281337
TCONS_00023682	12558	Cdh2	lncRNA	5.50214	3.05558	0.848547	0.00218381	0.0438821	mmu-miR-214-3p	866.854	544.158	0.66229	0.00013468	0.0046466	NM_007798.3	13030	Ctsb	transcript	44.5757	45.1527	-0.018554	7.35e-05	0.0248953
TCONS_00023682	12558	Cdh2	lncRNA	5.50214	3.05558	0.848547	0.00218381	0.0438821	mmu-miR-214-3p	866.854	544.158	0.66229	0.00013468	0.0046466	XM_006533995.4	67473	Slc47a1	transcript	1.20768	0.0603787	4.32205	0.000196345	0.0276354
TCONS_00023682	12558	Cdh2	lncRNA	5.50214	3.05558	0.848547	0.00218381	0.0438821	mmu-miR-214-3p	866.854	544.158	0.66229	0.00013468	0.0046466	NM_008258.2	15374	Jpt1	transcript	29.7754	15.9326	0.90214	0.00268557	0.0494042
TCONS_00023682	12558	Cdh2	lncRNA	5.50214	3.05558	0.848547	0.00218381	0.0438821	mmu-miR-214-3p	866.854	544.158	0.66229	0.00013468	0.0046466	XM_006516544.4	140580	Elmo1	transcript	0.964251	0	Inf	0.000820671	0.0276354
TCONS_00023682	12558	Cdh2	lncRNA	5.50214	3.05558	0.848547	0.00218381	0.0438821	mmu-miR-214-3p	866.854	544.158	0.66229	0.00013468	0.0046466	XM_011239446.4	228026	Pdk1	transcript	3.2763	0	Inf	0.000820671	0.0276354
TCONS_00023682	12558	Cdh2	lncRNA	5.50214	3.05558	0.848547	0.00218381	0.0438821	mmu-miR-214-3p	866.854	544.158	0.66229	0.00013468	0.0046466	TCONS_00002822	67512	Agpat2	transcript	1.95082	0	Inf	0.000820671	0.0276354
TCONS_00023682	12558	Cdh2	lncRNA	5.50214	3.05558	0.848547	0.00218381	0.0438821	mmu-miR-214-3p	866.854	544.158	0.66229	0.00013468	0.0046466	NM_175398.4	109050	Inka2	transcript	2.56575	7.08752	-1.4659	0.00255544	0.0482407
TCONS_00023682	12558	Cdh2	lncRNA	5.50214	3.05558	0.848547	0.00218381	0.0438821	mmu-miR-214-3p	866.854	544.158	0.66229	0.00013468	0.0046466	XM_030249575.2	18607	Pdpk1	transcript	3.59523	0	Inf	2.05e-05	0.0155632
TCONS_00023682	12558	Cdh2	lncRNA	5.50214	3.05558	0.848547	0.00218381	0.0438821	mmu-miR-214-3p	866.854	544.158	0.66229	0.00013468	0.0046466	NM_001288613.1	245860	Atg9a	transcript	2.10893	0.14069	3.90593	0.000401703	0.0276354
TCONS_00023682	12558	Cdh2	lncRNA	5.50214	3.05558	0.848547	0.00218381	0.0438821	mmu-miR-214-3p	866.854	544.158	0.66229	0.00013468	0.0046466	TCONS_00015185	14533	Bloc1s1	transcript	4.31854	0	Inf	0.000820671	0.0276354
TCONS_00023682	12558	Cdh2	lncRNA	5.50214	3.05558	0.848547	0.00218381	0.0438821	mmu-miR-214-3p	866.854	544.158	0.66229	0.00013468	0.0046466	XM_017321605.3	27418	Mkln1	transcript	1.57045	0.0165473	6.56843	0.00103662	0.0304533
TCONS_00023682	12558	Cdh2	lncRNA	5.50214	3.05558	0.848547	0.00218381	0.0438821	mmu-miR-214-3p	866.854	544.158	0.66229	0.00013468	0.0046466	NM_001310464.1	19699	Reln	transcript	1.91056	0	Inf	9.66e-05	0.0264941
TCONS_00023682	12558	Cdh2	lncRNA	5.50214	3.05558	0.848547	0.00218381	0.0438821	mmu-miR-214-3p	866.854	544.158	0.66229	0.00013468	0.0046466	XM_036162790.1	19130	Prox1	transcript	1.35014	0.000200667	12.716	2.04e-05	0.0155632
TCONS_00023682	12558	Cdh2	lncRNA	5.50214	3.05558	0.848547	0.00218381	0.0438821	mmu-miR-214-3p	866.854	544.158	0.66229	0.00013468	0.0046466	XM_036158471.1	15460	Hr	transcript	0	2.40576	#NAME?	0.0021495	0.0436572
TCONS_00023682	12558	Cdh2	lncRNA	5.50214	3.05558	0.848547	0.00218381	0.0438821	mmu-miR-214-3p	866.854	544.158	0.66229	0.00013468	0.0046466	XM_006517452.5	76577	Faf2	transcript	0.845375	0	Inf	0.000820671	0.0276354
TCONS_00023682	12558	Cdh2	lncRNA	5.50214	3.05558	0.848547	0.00218381	0.0438821	mmu-miR-214-3p	866.854	544.158	0.66229	0.00013468	0.0046466	NM_177673.2	230967	Cep104	transcript	3.10235	2.01391	0.623361	0.000626734	0.0276354
TCONS_00023682	12558	Cdh2	lncRNA	5.50214	3.05558	0.848547	0.00218381	0.0438821	mmu-miR-214-3p	866.854	544.158	0.66229	0.00013468	0.0046466	TCONS_00002486	68295	Aar2	transcript	1.18122	0	Inf	0.000820671	0.0276354
TCONS_00023682	12558	Cdh2	lncRNA	5.50214	3.05558	0.848547	0.00218381	0.0438821	mmu-miR-214-3p	866.854	544.158	0.66229	0.00013468	0.0046466	TCONS_00015789	107476	Acaca	transcript	0.855672	0.031853	4.74756	0.0012857	0.0341943
TCONS_00023682	12558	Cdh2	lncRNA	5.50214	3.05558	0.848547	0.00218381	0.0438821	mmu-miR-214-3p	866.854	544.158	0.66229	0.00013468	0.0046466	NM_153794.4	108654	Fam210a	transcript	5.80425	4.32633	0.423966	0.000651079	0.0276354
TCONS_00023682	12558	Cdh2	lncRNA	5.50214	3.05558	0.848547	0.00218381	0.0438821	mmu-miR-214-3p	866.854	544.158	0.66229	0.00013468	0.0046466	TCONS_00024433	73713	Rbm20	transcript	1.35106	0	Inf	0.000820671	0.0276354
TCONS_00023682	12558	Cdh2	lncRNA	5.50214	3.05558	0.848547	0.00218381	0.0438821	mmu-miR-214-3p	866.854	544.158	0.66229	0.00013468	0.0046466	NM_009088.3	20019	Polr1a	transcript	5.17423	7.65806	-0.565635	0.000892474	0.0287892
TCONS_00023682	12558	Cdh2	lncRNA	5.50214	3.05558	0.848547	0.00218381	0.0438821	mmu-miR-214-3p	866.854	544.158	0.66229	0.00013468	0.0046466	NM_001163379.1	55979	Agpat1	transcript	14.6579	11.2463	0.382229	0.000825619	0.0277196
TCONS_00023682	12558	Cdh2	lncRNA	5.50214	3.05558	0.848547	0.00218381	0.0438821	mmu-miR-214-3p	866.854	544.158	0.66229	0.00013468	0.0046466	NM_145447.2	217721	Flvcr2	transcript	2.72949	0.849176	1.6845	0.00015539	0.0276354
TCONS_00023682	12558	Cdh2	lncRNA	5.50214	3.05558	0.848547	0.00218381	0.0438821	mmu-miR-214-3p	866.854	544.158	0.66229	0.00013468	0.0046466	NM_001359505.1	77521	Mtus2	transcript	30.9488	21.1013	0.552555	0.000558842	0.0276354
TCONS_00023682	12558	Cdh2	lncRNA	5.50214	3.05558	0.848547	0.00218381	0.0438821	mmu-miR-214-3p	866.854	544.158	0.66229	0.00013468	0.0046466	XM_030255147.2	381290	Atp2b4	transcript	1.79149	0	Inf	0.000233871	0.0276354
TCONS_00023682	12558	Cdh2	lncRNA	5.50214	3.05558	0.848547	0.00218381	0.0438821	mmu-miR-214-3p	866.854	544.158	0.66229	0.00013468	0.0046466	TCONS_00001035	21961	Tns1	transcript	39.6786	2.46049	4.01134	0.00031257	0.0276354
TCONS_00023682	12558	Cdh2	lncRNA	5.50214	3.05558	0.848547	0.00218381	0.0438821	mmu-miR-214-3p	866.854	544.158	0.66229	0.00013468	0.0046466	TCONS_00022612	225049	Ttc7	transcript	1.28356	2.38495	-0.893809	1.15e-05	0.0155632
TCONS_00023682	12558	Cdh2	lncRNA	5.50214	3.05558	0.848547	0.00218381	0.0438821	mmu-miR-214-3p	866.854	544.158	0.66229	0.00013468	0.0046466	NM_011207.2	545622	Ptpn3	transcript	2.85143	0.047324	5.91297	0.000765875	0.0276354
TCONS_00023682	12558	Cdh2	lncRNA	5.50214	3.05558	0.848547	0.00218381	0.0438821	mmu-miR-214-3p	866.854	544.158	0.66229	0.00013468	0.0046466	XM_036154088.1	319518	Pdpr	transcript	1.61977	3.72043	-1.19968	0.000122455	0.0276354
TCONS_00023682	12558	Cdh2	lncRNA	5.50214	3.05558	0.848547	0.00218381	0.0438821	mmu-miR-214-3p	866.854	544.158	0.66229	0.00013468	0.0046466	NM_020486.2	57278	Bcam	transcript	97.5158	46.6059	1.06512	0.000167128	0.0276354
TCONS_00023682	12558	Cdh2	lncRNA	5.50214	3.05558	0.848547	0.00218381	0.0438821	mmu-miR-214-3p	866.854	544.158	0.66229	0.00013468	0.0046466	TCONS_00020016	65246	Xpo7	transcript	4.13029	0.00722533	9.15896	0.00116536	0.0326432
TCONS_00023682	12558	Cdh2	lncRNA	5.50214	3.05558	0.848547	0.00218381	0.0438821	mmu-miR-214-3p	866.854	544.158	0.66229	0.00013468	0.0046466	NM_009818.1	12385	Ctnna1	transcript	89.2245	90.2244	-0.0160775	0.000857497	0.0281337
TCONS_00023682	12558	Cdh2	lncRNA	5.50214	3.05558	0.848547	0.00218381	0.0438821	mmu-miR-214-3p	866.854	544.158	0.66229	0.00013468	0.0046466	NM_001347446.1	94089	Trim7	transcript	1.16147	7.15854	-2.62371	0.00045152	0.0276354
TCONS_00023682	12558	Cdh2	lncRNA	5.50214	3.05558	0.848547	0.00218381	0.0438821	mmu-miR-214-3p	866.854	544.158	0.66229	0.00013468	0.0046466	TCONS_00012153	76808	Rpl18a	transcript	32.7855	0	Inf	2.77e-05	0.0155632
TCONS_00023682	12558	Cdh2	lncRNA	5.50214	3.05558	0.848547	0.00218381	0.0438821	mmu-miR-214-3p	866.854	544.158	0.66229	0.00013468	0.0046466	XM_006534391.5	75580	Zbtb4	transcript	1.27003	0	Inf	0.000820671	0.0276354
TCONS_00023682	12558	Cdh2	lncRNA	5.50214	3.05558	0.848547	0.00218381	0.0438821	mmu-miR-214-3p	866.854	544.158	0.66229	0.00013468	0.0046466	NM_054046.5	23854	Def8	transcript	8.18934	6.47494	0.33888	0.0016116	0.037419
TCONS_00023682	12558	Cdh2	lncRNA	5.50214	3.05558	0.848547	0.00218381	0.0438821	mmu-miR-214-3p	866.854	544.158	0.66229	0.00013468	0.0046466	NM_024288.2	68477	Rmnd5a	transcript	14.9293	15.4847	-0.0526959	0.000690882	0.0276354
TCONS_00023682	12558	Cdh2	lncRNA	5.50214	3.05558	0.848547	0.00218381	0.0438821	mmu-miR-214-3p	866.854	544.158	0.66229	0.00013468	0.0046466	TCONS_00022295	81877	Tnxb	transcript	1.75426	0	Inf	0.000820671	0.0276354
TCONS_00023682	12558	Cdh2	lncRNA	5.50214	3.05558	0.848547	0.00218381	0.0438821	mmu-miR-214-3p	866.854	544.158	0.66229	0.00013468	0.0046466	NM_001165902.1	12387	Ctnnb1	transcript	1.01086	0.074119	3.76959	0.000164837	0.0276354
TCONS_00023682	12558	Cdh2	lncRNA	5.50214	3.05558	0.848547	0.00218381	0.0438821	mmu-miR-214-3p	866.854	544.158	0.66229	0.00013468	0.0046466	NM_008138.5	14678	Gnai2	transcript	64.7581	38.7376	0.741328	0.000133889	0.0276354
TCONS_00023682	12558	Cdh2	lncRNA	5.50214	3.05558	0.848547	0.00218381	0.0438821	mmu-miR-214-3p	866.854	544.158	0.66229	0.00013468	0.0046466	NM_001169577.1	22214	Ube2h	transcript	1.41218	0.0643033	4.45689	0.00189306	0.0407486
TCONS_00023682	12558	Cdh2	lncRNA	5.50214	3.05558	0.848547	0.00218381	0.0438821	mmu-miR-214-3p	866.854	544.158	0.66229	0.00013468	0.0046466	NM_170760.3	233073	U2af1l4	transcript	10.7881	11.8091	-0.13046	0.00194872	0.0413468
TCONS_00023682	12558	Cdh2	lncRNA	5.50214	3.05558	0.848547	0.00218381	0.0438821	mmu-miR-214-3p	866.854	544.158	0.66229	0.00013468	0.0046466	NM_011785.4	23797	Akt3	transcript	1.5986	0.0690953	4.53208	0.0015947	0.037419
TCONS_00023682	12558	Cdh2	lncRNA	5.50214	3.05558	0.848547	0.00218381	0.0438821	mmu-miR-214-3p	866.854	544.158	0.66229	0.00013468	0.0046466	XM_006521705.3	107589	Mylk	transcript	3.13462	3.83408	-0.290594	0.00265995	0.0492416
TCONS_00023682	12558	Cdh2	lncRNA	5.50214	3.05558	0.848547	0.00218381	0.0438821	mmu-miR-214-3p	866.854	544.158	0.66229	0.00013468	0.0046466	NM_138591.2	28030	Gfm1	transcript	34.2978	39.8161	-0.215235	0.00123449	0.0335637
TCONS_00023682	12558	Cdh2	lncRNA	5.50214	3.05558	0.848547	0.00218381	0.0438821	mmu-miR-214-3p	866.854	544.158	0.66229	0.00013468	0.0046466	TCONS_00005210	21687	Tek	transcript	2.18464	0	Inf	0.000820671	0.0276354
TCONS_00023682	12558	Cdh2	lncRNA	5.50214	3.05558	0.848547	0.00218381	0.0438821	mmu-miR-214-3p	866.854	544.158	0.66229	0.00013468	0.0046466	NM_053009.3	109910	Zfp91	transcript	24.0255	23.1627	0.0527611	0.000930839	0.0292165
TCONS_00023682	12558	Cdh2	lncRNA	5.50214	3.05558	0.848547	0.00218381	0.0438821	mmu-miR-214-3p	866.854	544.158	0.66229	0.00013468	0.0046466	NM_024214.2	67952	Tomm20	transcript	10.2066	7.84903	0.378922	0.000773909	0.0276354
TCONS_00023682	12558	Cdh2	lncRNA	5.50214	3.05558	0.848547	0.00218381	0.0438821	mmu-miR-214-3p	866.854	544.158	0.66229	0.00013468	0.0046466	NM_001012477.2	20315	Cxcl12	transcript	8.72303	23.6765	-1.44055	0.000741939	0.0276354
TCONS_00023682	12558	Cdh2	lncRNA	5.50214	3.05558	0.848547	0.00218381	0.0438821	mmu-miR-214-3p	866.854	544.158	0.66229	0.00013468	0.0046466	NM_001013024.2	72607	Usp13	transcript	43.9871	44.7173	-0.0237507	0.000631592	0.0276354
TCONS_00023682	12558	Cdh2	lncRNA	5.50214	3.05558	0.848547	0.00218381	0.0438821	mmu-miR-214-3p	866.854	544.158	0.66229	0.00013468	0.0046466	XM_030250848.1	228998	Arfgap1	transcript	1.08784	0	Inf	0.000820671	0.0276354
TCONS_00023682	12558	Cdh2	lncRNA	5.50214	3.05558	0.848547	0.00218381	0.0438821	mmu-miR-214-3p	866.854	544.158	0.66229	0.00013468	0.0046466	NM_001081979.2	17257	Mecp2	transcript	3.25013	3.79955	-0.22533	0.000372863	0.0276354
TCONS_00023682	12558	Cdh2	lncRNA	5.50214	3.05558	0.848547	0.00218381	0.0438821	mmu-miR-214-3p	866.854	544.158	0.66229	0.00013468	0.0046466	NM_053159.4	94062	Mrpl3	transcript	20.8991	24.078	-0.204272	1.09e-05	0.0155632
TCONS_00023682	12558	Cdh2	lncRNA	5.50214	3.05558	0.848547	0.00218381	0.0438821	mmu-miR-214-3p	866.854	544.158	0.66229	0.00013468	0.0046466	NM_001253757.1	66471	Anp32e	transcript	1.72974	1.29992	0.412137	0.00160311	0.037419
TCONS_00023682	12558	Cdh2	lncRNA	5.50214	3.05558	0.848547	0.00218381	0.0438821	mmu-miR-214-3p	866.854	544.158	0.66229	0.00013468	0.0046466	NM_133808.5	110611	Hdlbp	transcript	60.027	71.0376	-0.242973	0.00219802	0.0438821
TCONS_00023682	12558	Cdh2	lncRNA	5.50214	3.05558	0.848547	0.00218381	0.0438821	mmu-miR-214-3p	866.854	544.158	0.66229	0.00013468	0.0046466	NM_001360132.1	20130	Rras	transcript	1.46932	0	Inf	0.000820671	0.0276354
TCONS_00023682	12558	Cdh2	lncRNA	5.50214	3.05558	0.848547	0.00218381	0.0438821	mmu-miR-214-3p	866.854	544.158	0.66229	0.00013468	0.0046466	XM_036165784.1	12321	Calu	transcript	10.5439	16.3948	-0.636826	0.00157708	0.0372453
TCONS_00023682	12558	Cdh2	lncRNA	5.50214	3.05558	0.848547	0.00218381	0.0438821	mmu-miR-214-3p	866.854	544.158	0.66229	0.00013468	0.0046466	XM_006530878.1	234595	Slc38a7	transcript	0.923806	0.0383027	4.59207	3.17e-05	0.0155632
TCONS_00023682	12558	Cdh2	lncRNA	5.50214	3.05558	0.848547	0.00218381	0.0438821	mmu-miR-214-3p	866.854	544.158	0.66229	0.00013468	0.0046466	TCONS_00020910	223697	Sun2	transcript	2.54478	0	Inf	0.000820671	0.0276354
TCONS_00023682	12558	Cdh2	lncRNA	5.50214	3.05558	0.848547	0.00218381	0.0438821	mmu-miR-214-3p	866.854	544.158	0.66229	0.00013468	0.0046466	NM_010489.2	15587	Hyal2	transcript	3.40604	0.443805	2.94009	0.00142619	0.0355126
TCONS_00023682	12558	Cdh2	lncRNA	5.50214	3.05558	0.848547	0.00218381	0.0438821	mmu-miR-214-3p	866.854	544.158	0.66229	0.00013468	0.0046466	NM_024454.1	216344	Rab21	transcript	0.620409	17.8734	-4.84845	0.000508496	0.0276354
TCONS_00023682	12558	Cdh2	lncRNA	5.50214	3.05558	0.848547	0.00218381	0.0438821	mmu-miR-214-3p	866.854	544.158	0.66229	0.00013468	0.0046466	NM_001252638.1	69288	Rhobtb1	transcript	0.0385657	2.18074	-5.82136	0.00249007	0.0476339
TCONS_00023682	12558	Cdh2	lncRNA	5.50214	3.05558	0.848547	0.00218381	0.0438821	mmu-miR-214-3p	866.854	544.158	0.66229	0.00013468	0.0046466	NM_177059.3	320027	Fstl4	transcript	2.66003	0	Inf	0.00041668	0.0276354
TCONS_00023682	12558	Cdh2	lncRNA	5.50214	3.05558	0.848547	0.00218381	0.0438821	mmu-miR-214-3p	866.854	544.158	0.66229	0.00013468	0.0046466	NM_009634.6	11564	Adsl	transcript	8.39214	7.60029	0.142984	0.000689457	0.0276354
TCONS_00023682	12558	Cdh2	lncRNA	5.50214	3.05558	0.848547	0.00218381	0.0438821	mmu-miR-214-3p	866.854	544.158	0.66229	0.00013468	0.0046466	XM_006522138.4	252870	Usp7	transcript	1.00697	0	Inf	0.000820671	0.0276354
TCONS_00023682	12558	Cdh2	lncRNA	5.50214	3.05558	0.848547	0.00218381	0.0438821	mmu-miR-214-3p	866.854	544.158	0.66229	0.00013468	0.0046466	TCONS_00023376	19290	Pura	transcript	2.15409	0.008678	7.9555	0.00096005	0.0297987
TCONS_00023682	12558	Cdh2	lncRNA	5.50214	3.05558	0.848547	0.00218381	0.0438821	mmu-miR-214-3p	866.854	544.158	0.66229	0.00013468	0.0046466	TCONS_00017162	11430	Acox1	transcript	12.213	0.001165	13.3558	0.000790298	0.0276354
TCONS_00023682	12558	Cdh2	lncRNA	5.50214	3.05558	0.848547	0.00218381	0.0438821	mmu-miR-214-3p	866.854	544.158	0.66229	0.00013468	0.0046466	XM_006515925.4	26932	Ppp2r5e	transcript	1.17794	0.258766	2.18654	0.000952025	0.0296311
TCONS_00023682	12558	Cdh2	lncRNA	5.50214	3.05558	0.848547	0.00218381	0.0438821	mmu-miR-214-3p	866.854	544.158	0.66229	0.00013468	0.0046466	NM_029573.2	67834	Idh3a	transcript	102.21	117.679	-0.203314	0.000977083	0.0298464
TCONS_00023682	12558	Cdh2	lncRNA	5.50214	3.05558	0.848547	0.00218381	0.0438821	mmu-miR-214-3p	866.854	544.158	0.66229	0.00013468	0.0046466	NM_018743.4	102247	Gpat4	transcript	7.76624	6.97285	0.155467	0.00132739	0.0345061
TCONS_00023682	12558	Cdh2	lncRNA	5.50214	3.05558	0.848547	0.00218381	0.0438821	mmu-miR-214-3p	866.854	544.158	0.66229	0.00013468	0.0046466	NM_027558.1	70804	Pgrmc2	transcript	13.5548	8.47909	0.676825	0.000359363	0.0276354
TCONS_00023682	12558	Cdh2	lncRNA	5.50214	3.05558	0.848547	0.00218381	0.0438821	mmu-miR-214-3p	866.854	544.158	0.66229	0.00013468	0.0046466	NM_008681.2	17988	Ndrg1	transcript	13.4879	7.27813	0.890022	0.00249471	0.0476436
XR_380269.2	102636048	Gm38485	lncRNA	1.17026	0	Inf	0.000820671	0.0276354	mmu-miR-214-3p	866.854	544.158	0.66229	0.00013468	0.0046466	XM_006519358.3	65107	Lrp10	transcript	2.10967	0.25084	3.07218	0.00255949	0.0482407
XR_380269.2	102636048	Gm38485	lncRNA	1.17026	0	Inf	0.000820671	0.0276354	mmu-miR-214-3p	866.854	544.158	0.66229	0.00013468	0.0046466	TCONS_00004132	229663	Csde1	transcript	48.2189	63.0905	-0.387826	0.0012973	0.0342571
XR_380269.2	102636048	Gm38485	lncRNA	1.17026	0	Inf	0.000820671	0.0276354	mmu-miR-214-3p	866.854	544.158	0.66229	0.00013468	0.0046466	NM_007395.4	11479	Acvr1b	transcript	6.46432	3.77857	0.774661	0.000388991	0.0276354
XR_380269.2	102636048	Gm38485	lncRNA	1.17026	0	Inf	0.000820671	0.0276354	mmu-miR-214-3p	866.854	544.158	0.66229	0.00013468	0.0046466	TCONS_00022043	20656	Sod2	transcript	6.07359	0.19545	4.95768	0.0002461	0.0276354
XR_380269.2	102636048	Gm38485	lncRNA	1.17026	0	Inf	0.000820671	0.0276354	mmu-miR-214-3p	866.854	544.158	0.66229	0.00013468	0.0046466	NM_001013390.3	399548	Scn4b	transcript	2.15251	16.2847	-2.91942	0.00111032	0.0316263
XR_380269.2	102636048	Gm38485	lncRNA	1.17026	0	Inf	0.000820671	0.0276354	mmu-miR-214-3p	866.854	544.158	0.66229	0.00013468	0.0046466	XM_006503677.4	11518	Add1	transcript	1.28784	0.00563833	7.83547	0.000849239	0.028103
XR_380269.2	102636048	Gm38485	lncRNA	1.17026	0	Inf	0.000820671	0.0276354	mmu-miR-214-3p	866.854	544.158	0.66229	0.00013468	0.0046466	NM_001077184.1	12215	Bsg	transcript	229.288	397.283	-0.793008	0.0014193	0.0355126
XR_380269.2	102636048	Gm38485	lncRNA	1.17026	0	Inf	0.000820671	0.0276354	mmu-miR-214-3p	866.854	544.158	0.66229	0.00013468	0.0046466	XM_006507175.4	101706	Numa1	transcript	2.05864	1.25498	0.714031	0.00217807	0.0438821
XR_380269.2	102636048	Gm38485	lncRNA	1.17026	0	Inf	0.000820671	0.0276354	mmu-miR-214-3p	866.854	544.158	0.66229	0.00013468	0.0046466	XM_006538665.4	192185	Nadk	transcript	0.972007	0.0104583	6.53824	0.00196035	0.0413468
[truncated: 5,084 more rows]

## Sheet: HyperTH vs HypoTH
Transcript	gene_id	gene_name	feature	HyperTH.value	HypoTH.value	log2foldchange	pvalue	qvalue	sRNA	HyperTH.value	HypoTH.value	log2FoldChange	pval	padj	Transcript	gene_id	gene_name	feature	HyperTH.value	HypoTH.value	log2foldchange	pvalue	qvalue
[truncated: 49,520 more rows]

[truncated: 1 more sheets: HypoTH+T3 vs HypoTH]
