# Supplementary material for: Novel Transcriptomic Interactomes of Noncoding RNAs in the Heart under Altered Thyroid Hormonal States
Source: Int J Mol Sci. 2023 Mar 31;24(7):6560. doi: 10.3390/ijms24076560 (PMC10095585; doi:10.3390/ijms24076560)
Supplement: Supplementary file 1 [file ijms-24-06560-s001.zip › Supplemental File S15 lncRNA-mRNA.co-expression.cis_interaction.xlsx]

## Sheet: lncRNA-mRNA.co-expression.cis_i
lncRNA_id	mRNA_id	corelation	p_value	lncRNA_name	lncRNA_loci	mRNA_name	mRNA_loci	mRNA_gene_id	mRNA_gene_name	distance	cis_direction
NR_015470.1	NM_001357376.1	0.705166	0.010421	RIKEN cDNA 2610203C22 gene	NC_000067.7:9631056-9701317	alcohol dehydrogenase%2C iron containing%2C 1%2C transcript variant 2	NC_000067.7:9618172-9648195	76187	Adhfe1	17139	down_stream
XR_003947751.1	XM_011238388.3	0.958574	1e-06	RIKEN cDNA C130013N14 gene	NC_000067.7:16366981-16384958	staufen double-stranded RNA binding protein 2%2C transcript variant X5	NC_000067.7:16401161-16589599	29819	Stau2	16203	up_stream
XR_865460.3	TCONS_00000193	0.731197	0.006891	predicted gene%2C 39650	NC_000067.7:60926093-60926693	TCONS_00000193	NC_000067.7:60850257-60954948	105243938	Gm38137	28855	down_stream
TCONS_00001038	TCONS_00001008	0.736487	0.0063	TCONS_00001038	NC_000067.7:74039625-74108132	TCONS_00001008	NC_000067.7:73949390-74056072	21961	Tns1	16447	down_stream
TCONS_00001097	NM_177055.3	0.800062	0.001779	TCONS_00001097	NC_000067.7:85684930-85686469	RIKEN cDNA A630001G21 gene	NC_000067.7:85644803-85664327	319997	A630001G21Rik	20603	down_stream
NR_138577.1	NM_011796.2	0.73444	0.006524	RIKEN cDNA 5033417F24 gene%2C transcript variant 1	NC_000067.7:92836099-92838411	calpain 10	NC_000067.7:92862129-92875670	23830	Capn10	23718	up_stream
NR_045298.1	TCONS_00000436	-0.916393	2.8e-05	RIKEN cDNA 2900009J06 gene	NC_000067.7:127681353-127701791	TCONS_00000436	NC_000067.7:127701908-127736128	72949	Ccnt2	117	up_stream
NR_037984.1	TCONS_00000484	-0.716726	0.008719	predicted gene%2C 19461	NC_000067.7:133177589-133197546	TCONS_00000484	NC_000067.7:133168803-133231169	240753	Plekha6	28743	down_stream
XR_003948727.2	NM_026024.3	0.794018	0.002043	predicted gene%2C 51748	NC_000067.7:134859973-134875182	ubiquitin-conjugating enzyme E2T%2C transcript variant 1	NC_000067.7:134890302-134901918	67196	Ube2t	15120	up_stream
NR_040438.1	NM_010476.3	0.845178	0.000537	RIKEN cDNA 3110045C21 gene	NC_000067.7:169796977-169799965	hydroxysteroid (17-beta) dehydrogenase 7	NC_000067.7:169777105-169796774	15490	Hsd17b7	203	down_stream
XR_865733.1	NM_178405.3	0.914494	3.1e-05	predicted gene%2C 39704	NC_000067.7:172115458-172116861	ATPase%2C Na+/K+ transporting%2C alpha 2 polypeptide	NC_000067.7:172099275-172125631	98660	Atp1a2	10173	down_stream
XR_104601.4	TCONS_00001512	0.758003	0.004282	RIKEN cDNA B230369F24 gene	NC_000067.7:178141567-178145564	TCONS_00001512	NC_000067.7:178146709-178165380	51810	Hnrnpu	1145	up_stream
XR_104601.4	NM_025511.2	-0.821952	0.001036	RIKEN cDNA B230369F24 gene	NC_000067.7:178141567-178145564	cytochrome c oxidase assembly protein 20	NC_000067.7:178146717-178150258	66359	Cox20	1153	up_stream
XR_104601.4	XM_036152312.1	0.762136	0.003958	RIKEN cDNA B230369F24 gene	NC_000067.7:178141567-178145564	heterogeneous nuclear ribonucleoprotein U%2C transcript variant X1	NC_000067.7:178148672-178170063	51810	Hnrnpu	3108	up_stream
TCONS_00000681	NM_001370897.1	0.852173	0.000431	TCONS_00000681	NC_000067.7:179548826-179558567	kinesin family member 28	NC_000067.7:179522601-179572765	383592	Kif28	23939	down_stream
NR_151620.1	TCONS_00001583	0.733211	0.006661	prospero homeobox 1%2C opposite strand	NC_000067.7:189902492-189949476	TCONS_00001583	NC_000067.7:189850432-189902930	19130	Prox1	438	down_stream
XR_004935606.1	XM_006497173.4	0.716371	0.008768	uncharacterized LOC118567659	NC_000067.7:190675090-190675894	ribosomal protein S6 kinase polypeptide 1%2C transcript variant X2	NC_000067.7:190505075-190645207	320119	Rps6kc1	29883	down_stream
XR_004935606.1	XM_030254962.1	0.7815	0.002682	uncharacterized LOC118567659	NC_000067.7:190675090-190675894	ribosomal protein S6 kinase polypeptide 1%2C transcript variant X9	NC_000067.7:190505075-190645207	320119	Rps6kc1	29883	down_stream
XR_004935606.1	XM_017321690.3	0.762914	0.003899	uncharacterized LOC118567659	NC_000067.7:190675090-190675894	angel homolog 2%2C transcript variant X11	NC_000067.7:190660708-190679159	52477	Angel2	4069	down_stream
NR_033536.1	XM_030252885.2	0.841946	0.000592	predicted gene 10516	NC_000067.7:191821197-191835322	REST corepressor 3%2C transcript variant X11	NC_000067.7:191804439-191822359	214742	Rcor3	1162	down_stream
TCONS_00000758	NM_008484.2	0.888888	0.00011	TCONS_00000758	NC_000067.7:192955584-192963498	laminin%2C beta 3%2C transcript variant 1	NC_000067.7:192984301-193026186	16780	Lamb3	20803	up_stream
TCONS_00000769	NM_001111059.1	0.84712	0.000506	TCONS_00000769	NC_000067.7:194671288-194712294	CD34 antigen%2C transcript variant 1	NC_000067.7:194621128-194643600	12490	Cd34	27688	down_stream
XR_004940822.1	NM_015765.2	0.847331	0.000503	uncharacterized LOC118568495	NC_000068.8:3490837-3491967	heat shock protein 14%2C transcript variant 1	NC_000068.8:3489890-3513851	50497	Hspa14	2077	down_stream
NR_152207.1	NM_008714.3	0.781163	0.002701	RIKEN cDNA 0610009E02 gene%2C transcript variant 1	NC_000068.8:26335935-26349402	notch 1	NC_000068.8:26347913-26393834	18128	Notch1	1489	up_stream
XR_374179.1	NM_009298.4	0.777197	0.002934	predicted gene%2C 36591	NC_000068.8:26818259-26823280	surfeit gene 6	NC_000068.8:26780429-26792899	20935	Surf6	25360	down_stream
XR_374179.1	NM_001033908.1	0.781306	0.002693	predicted gene%2C 36591	NC_000068.8:26818259-26823280	mediator complex subunit 22%2C transcript variant 2	NC_000068.8:26795278-26800654	20933	Med22	17605	down_stream
XR_374179.1	NM_011513.2	0.863105	0.0003	predicted gene%2C 36591	NC_000068.8:26818259-26823280	mediator complex subunit 22%2C transcript variant 1	NC_000068.8:26795278-26800654	20933	Med22	17605	down_stream
NR_029460.1	TCONS_00002848	0.836097	0.000703	RIKEN cDNA 6530402F18 gene	NC_000068.8:29135127-29143005	TCONS_00002848	NC_000068.8:29084269-29143005	171171	Ntng2	7878	down_stream
XR_003954022.1	NM_001177649.1	-0.792444	0.002116	predicted gene%2C 39786%2C transcript variant X3	NC_000068.8:30878261-30886621	formin binding protein 1%2C transcript variant 4	NC_000068.8:30916217-31032020	14269	Fnbp1	29596	up_stream
NR_166059.1	TCONS_00002944	-0.838308	0.000659	predicted gene%2C 46735	NC_000068.8:36081957-36083741	TCONS_00002944	NC_000068.8:36006090-36080457	67889	Rbm18	1500	down_stream
TCONS_00002972	NM_001289521.1	0.826754	0.000912	TCONS_00002972	NC_000068.8:44993622-44998982	zinc finger E-box binding homeobox 2%2C transcript variant 3	NC_000068.8:44873523-45000289	24136	Zeb2	6667	down_stream
XR_003953832.2	NM_001141932.1	0.82653	0.000917	uncharacterized LOC108168762	NC_000068.8:60713309-60727241	RNA binding motif%2C single stranded interacting protein 1%2C transcript variant 1	NC_000068.8:60582296-60711782	56878	Rbms1	1527	down_stream
XR_866391.3	NM_016866.2	0.836847	0.000688	predicted gene 13596%2C transcript variant X1	NC_000068.8:68303307-68312619	serine/threonine kinase 39	NC_000068.8:68040790-68302325	53416	Stk39	982	down_stream
XR_866494.2	XM_030250934.2	0.72305	0.00788	predicted gene%2C 39860	NC_000068.8:76505984-76510407	protein kinase%2C interferon inducible double stranded RNA dependent activator%2C transcript variant X1	NC_000068.8:76436384-76478614	23992	Prkra	27370	down_stream
XR_866494.2	XM_030250935.2	0.763516	0.003854	predicted gene%2C 39860	NC_000068.8:76505984-76510407	protein kinase%2C interferon inducible double stranded RNA dependent activator%2C transcript variant X2	NC_000068.8:76460915-76478614	23992	Prkra	27370	down_stream
XR_374739.1	TCONS_00003099	0.864571	0.000285	predicted gene%2C 35266	NC_000068.8:77029940-77036543	TCONS_00003099	NC_000068.8:76840249-77001412	545428	Ccdc141	28528	down_stream
XR_003953862.2	NM_009454.2	0.756621	0.004394	predicted gene%2C 51431	NC_000068.8:78702822-78725666	ubiquitin-conjugating enzyme E2E 3%2C transcript variant 1	NC_000068.8:78699390-78750927	22193	Ube2e3	26276	down_stream
NR_015464.1	XM_006500425.1	0.781487	0.002683	RIKEN cDNA A330069E16 gene	NC_000068.8:91067490-91068702	protein kinase C and casein kinase substrate in neurons 3%2C transcript variant X2	NC_000068.8:91086442-91095024	80708	Pacsin3	17740	up_stream
XR_866530.4	XM_006499252.3	0.780799	0.002722	predicted gene%2C 39876	NC_000068.8:91761894-91764861	autophagy/beclin 1 regulator 1%2C transcript variant X1	NC_000068.8:91560463-91749194	228361	Ambra1	12700	down_stream
XR_866530.4	NM_001080754.1	0.761884	0.003977	predicted gene%2C 39876	NC_000068.8:91761894-91764861	autophagy/beclin 1 regulator 1%2C transcript variant 2	NC_000068.8:91560482-91749194	228361	Ambra1	12700	down_stream
XR_866530.4	NM_172669.3	0.750076	0.004958	predicted gene%2C 39876	NC_000068.8:91761894-91764861	autophagy/beclin 1 regulator 1%2C transcript variant 1	NC_000068.8:91560482-91749194	228361	Ambra1	12700	down_stream
NR_027831.1	NM_007466.3	0.754961	0.004532	RIKEN cDNA 2810002D19 gene	NC_000068.8:94237051-94242027	apoptosis inhibitor 5%2C transcript variant 2	NC_000068.8:94242071-94268531	11800	Api5	44	up_stream
TCONS_00003211	XM_006499734.5	-0.807923	0.001477	TCONS_00003211	NC_000068.8:104534951-104542513	t-complex 11 like 1%2C transcript variant X1	NC_000068.8:104497586-104542525	320554	Tcp11l1	7574	down_stream
TCONS_00003234	NM_009608.4	0.900985	6.3e-05	TCONS_00003234	NC_000068.8:113884797-113892026	actin%2C alpha%2C cardiac muscle 1	NC_000068.8:113877762-113883356	11464	Actc1	1441	down_stream
XR_004941041.1	NM_009608.4	0.783018	0.002597	uncharacterized LOC118568549	NC_000068.8:113905237-113919961	actin%2C alpha%2C cardiac muscle 1	NC_000068.8:113877762-113883356	11464	Actc1	21881	down_stream
NR_166192.1	TCONS_00003326	0.92534	1.6e-05	RIKEN cDNA A630026N12 gene	NC_000068.8:126511847-126517207	TCONS_00003326	NC_000068.8:126470883-126511177	14391	Gabpb1	670	down_stream
TCONS_00003333	XM_036162436.1	0.763771	0.003835	TCONS_00003333	NC_000068.8:126732310-126738161	transient receptor potential cation channel%2C subfamily M%2C member 7%2C transcript variant X4	NC_000068.8:126649307-126718177	58800	Trpm7	14133	down_stream
NR_168332.1	NM_027192.2	0.851913	0.000435	predicted gene%2C 46764%2C transcript variant 1	NC_000068.8:128934692-128942863	tubulin tyrosine ligase	NC_000068.8:128907866-128938203	69737	Ttl	3511	down_stream
NR_029452.1	NM_183262.3	0.850085	0.000461	serine/threonine kinase 35%2C opposite strand 1	NC_000068.8:129640288-129643379	serine/threonine kinase 35%2C transcript variant 1	NC_000068.8:129642436-129674207	67333	Stk35	943	up_stream
NR_015523.2	NM_009730.3	0.918884	2.4e-05	RIKEN cDNA A730017L22 gene	NC_000068.8:130714460-130748316	attractin	NC_000068.8:130748414-130872249	11990	Atrn	98	up_stream
XR_001783482.2	NM_138651.7	0.762302	0.003946	predicted gene%2C 46766	NC_000068.8:132105423-132111024	CDP-diacylglycerol synthase (phosphatidate cytidylyltransferase) 2%2C transcript variant 1	NC_000068.8:132105067-132153970	110911	Cds2	5957	down_stream
XR_004940953.1	NM_019771.2	0.77627	0.00299	uncharacterized LOC118568520	NC_000068.8:143795920-143798384	destrin	NC_000068.8:143757250-143785244	56431	Dstn	10676	down_stream
XR_004940958.1	NM_001141965.1	0.758687	0.004227	uncharacterized LOC118568522	NC_000068.8:145703105-145717493	N(alpha)-acetyltransferase 20%2C NatB catalytic subunit%2C transcript variant 1	NC_000068.8:145745160-145758345	67877	Naa20	27667	up_stream
XR_004940986.1	XM_011239491.4	0.876417	0.000184	uncharacterized LOC118568531	NC_000068.8:158324432-158333654	Ral GTPase activating protein%2C beta subunit (non-catalytic)%2C transcript variant X11	NC_000068.8:158251721-158296028	228850	Ralgapb	28404	down_stream
TCONS_00003524	NM_001033411.3	0.786486	0.002411	TCONS_00003524	NC_000068.8:160101510-160169414	predicted gene 826	NC_000068.8:160153320-160169414	329554	Gm826	16094	up_stream
XR_375198.4	XM_006499972.3	0.868303	0.000249	predicted gene%2C 35750	NC_000068.8:163196476-163207180	junctophilin 2%2C transcript variant X1	NC_000068.8:163179864-163239969	59091	Jph2	27316	down_stream
NR_166168.1	NM_011106.2	0.738293	0.006108	predicted gene 16316	NC_000068.8:163527635-163534027	protein kinase inhibitor%2C gamma%2C transcript variant 1	NC_000068.8:163535956-163568078	18769	Pkig	1929	up_stream
XR_004940793.1	NM_146129.3	0.713606	0.009156	RIKEN cDNA 4930445K14 gene	NC_000068.8:164720206-164725371	phosphorylated CTD interacting factor 1%2C transcript variant 4	NC_000068.8:164721287-164733357	228866	Pcif1	4084	up_stream
XR_001783554.3	NM_177782.3	0.860094	0.000332	predicted gene%2C 50596	NC_000068.8:166542872-166544819	phosphatidylinositol-3%2C4%2C5-trisphosphate-dependent Rac exchange factor 1	NC_000068.8:166408264-166555752	277360	Prex1	12880	down_stream
NR_138563.1	XM_006500456.4	0.716928	0.008691	zinc finger%2C NFX1-type containing 1%2C antisense RNA 1	NC_000068.8:166904853-166907782	zinc finger%2C NFX1-type containing 1%2C transcript variant X1	NC_000068.8:166877709-166904924	98999	Znfx1	71	down_stream
XR_003954096.2	NM_008968.4	0.758246	0.004262	RIKEN cDNA 1110018N20 gene%2C transcript variant X1	NC_000068.8:167031659-167039455	prostaglandin I2 (prostacyclin) synthase	NC_000068.8:167045113-167082525	19223	Ptgis	5658	up_stream
TCONS_00003644	XM_036162769.1	0.826382	0.000921	TCONS_00003644	NC_000068.8:176640792-176748439	predicted gene 14421	NC_000068.8:176745856-176748499	102639713	Gm14421	2583	up_stream
XR_003954436.1	NM_025434.3	-0.881791	0.000149	predicted gene%2C 52601	NC_000069.7:8981976-8988632	mitochondrial ribosomal protein S28	NC_000069.7:8867205-8988917	66230	Mrps28	6941	down_stream
XR_004941570.1	XM_006501913.5	0.722851	0.007906	uncharacterized LOC118568616	NC_000069.7:66911449-66920443	arginine/serine-rich coiled-coil 1%2C transcript variant X7	NC_000069.7:66892982-66992569	66880	Rsrc1	27461	down_stream
TCONS_00003978	NM_020517.4	-0.827805	0.000886	TCONS_00003978	NC_000069.7:89299162-89306086	lens epithelial protein	NC_000069.7:89309202-89309957	57275	Lenep	3116	up_stream
TCONS_00003978	NM_177041.4	-0.749794	0.004983	TCONS_00003978	NC_000069.7:89299162-89306086	flavin adenine dinucleotide synthetase 1%2C transcript variant 1	NC_000069.7:89309979-89319188	319945	Flad1	3893	up_stream
TCONS_00003978	TCONS_00003983	0.771119	0.003319	TCONS_00003978	NC_000069.7:89299162-89306086	TCONS_00003983	NC_000069.7:89325857-89337336	20416	Shc1	19771	up_stream
NR_040403.1	NM_001113331.2	-0.739551	0.005976	predicted gene 15417%2C transcript variant 1	NC_000069.7:89299170-89306086	src homology 2 domain-containing transforming protein C1%2C transcript variant 1	NC_000069.7:89328927-89337336	20416	Shc1	22841	up_stream
XR_375830.5	XM_017319677.3	0.836265	0.000699	predicted gene%2C 34865	NC_000069.7:90031952-90034423	tropomyosin 3%2C gamma%2C transcript variant X3	NC_000069.7:89986832-90002466	59069	Tpm3	29486	down_stream
NR_045872.1	NM_013841.3	0.793205	0.00208	predicted gene 9054	NC_000069.7:95892821-95894279	vacuolar protein sorting 45	NC_000069.7:95907143-95965767	22365	Vps45	12864	up_stream
NR_040759.1	XM_036163174.1	0.72	0.008277	potassium voltage-gated channel%2C Shal-related family%2C member 3%2C opposite strand	NC_000069.7:105355505-105360271	potassium voltage-gated channel%2C Shal-related family%2C member 3%2C transcript variant X2	NC_000069.7:105359478-105427583	56543	Kcnd3	793	up_stream
XR_003954676.2	XM_030252591.2	-0.774136	0.003123	predicted gene%2C 52629	NC_000069.7:107585604-107599143	S-adenosylhomocysteine hydrolase-like 1%2C transcript variant X2	NC_000069.7:107572827-107603859	229709	Ahcyl1	18255	down_stream
XR_867572.3	NM_008246.2	0.724722	0.007669	predicted gene%2C 40126	NC_000069.7:116483714-116487029	major facilitator superfamily domain containing 14A	NC_000069.7:116424812-116456326	15247	Mfsd14a	27388	down_stream
XR_867572.3	XM_036163084.1	0.728916	0.007158	predicted gene%2C 40126	NC_000069.7:116483714-116487029	solute carrier family 35 (UDP-N-acetylglucosamine (UDP-GlcNAc) transporter)%2C member 3%2C transcript variant X4	NC_000069.7:116463121-116505909	229782	Slc35a3	22195	down_stream
XR_867572.3	XM_006501425.5	0.759549	0.004158	predicted gene%2C 40126	NC_000069.7:116483714-116487029	solute carrier family 35 (UDP-N-acetylglucosamine (UDP-GlcNAc) transporter)%2C member 3%2C transcript variant X1	NC_000069.7:116463367-116505710	229782	Slc35a3	21996	down_stream
XR_003954577.1	NM_011100.4	0.752125	0.004776	uncharacterized LOC115486180	NC_000069.7:146506029-146518385	protein kinase%2C cAMP dependent%2C catalytic%2C beta%2C transcript variant 1	NC_000069.7:146435333-146518701	18749	Prkacb	12672	down_stream
XR_004941579.1	XM_006500853.5	0.874051	0.000201	uncharacterized LOC118568621	NC_000069.7:152134490-152150638	zinc finger%2C ZZ domain containing 3%2C transcript variant X7	NC_000069.7:152101622-152152524	108946	Zzz3	18034	down_stream
XR_004941579.1	XM_006500854.5	0.994717	0	uncharacterized LOC118568621	NC_000069.7:152134490-152150638	zinc finger%2C ZZ domain containing 3%2C transcript variant X9	NC_000069.7:152101622-152152524	108946	Zzz3	18034	down_stream
XR_003955370.1	NM_181401.3	0.931431	1.1e-05	predicted gene%2C 51436	NC_000070.7:15266756-15279186	transmembrane protein 64	NC_000070.7:15265819-15286753	100201	Tmem64	13367	down_stream
NR_166789.1	NM_080289.2	-0.774777	0.003083	RIKEN cDNA 1700055D18 gene	NC_000070.7:45012809-45014351	glyoxylate reductase/hydroxypyruvate reductase%2C transcript variant 1	NC_000070.7:44981393-44990734	76238	Grhpr	22075	down_stream
XR_004942046.1	XM_006537531.4	0.890183	0.000104	uncharacterized LOC118568660	NC_000070.7:53440926-53459531	solute carrier family 44%2C member 1%2C transcript variant X1	NC_000070.7:53440386-53565313	100434	Slc44a1	19145	down_stream
XR_004942046.1	NM_133891.3	0.704099	0.01059	uncharacterized LOC118568660	NC_000070.7:53440926-53459531	solute carrier family 44%2C member 1%2C transcript variant 1	NC_000070.7:53440412-53622478	100434	Slc44a1	19119	down_stream
NR_027923.1	NM_001285531.1	0.804603	0.001599	RIKEN cDNA C630043F03 gene	NC_000070.7:72119480-72122167	transducin-like enhancer of split 1%2C transcript variant 4	NC_000070.7:72075816-72119130	21885	Tle1	350	down_stream
XR_003955056.2	NM_026368.2	0.70023	0.011219	uncharacterized LOC115489886%2C transcript variant X5	NC_000070.7:94348513-94365809	caspase activity and apoptosis inhibitor 1	NC_000070.7:94388315-94445033	67770	Caap1	22506	up_stream
XR_376450.3	NM_053157.2	-0.737014	0.006244	RIKEN cDNA 0610025J13 gene%2C transcript variant X1	NC_000070.7:98209592-98220197	TM2 domain containing 1	NC_000070.7:98243606-98271502	94043	Tm2d1	23409	up_stream
XR_004942161.1	XM_036164031.1	0.714328	0.009053	uncharacterized LOC118567349	NC_000070.7:108609885-108628146	zinc finger%2C FYVE domain containing 9%2C transcript variant X6	NC_000070.7:108495030-108637853	230597	Zfyve9	27968	down_stream
XR_004942161.1	XM_036164030.1	0.704502	0.010526	uncharacterized LOC118567349	NC_000070.7:108609885-108628146	zinc finger%2C FYVE domain containing 9%2C transcript variant X4	NC_000070.7:108495999-108638125	230597	Zfyve9	28240	down_stream
XR_868014.3	NM_001301368.1	0.837865	0.000668	predicted gene%2C 40227	NC_000070.7:109488075-109507392	cyclin dependent kinase inhibitor 2C%2C transcript variant 1	NC_000070.7:109518072-109523953	12580	Cdkn2c	10680	up_stream
NR_166454.1	NM_001301368.1	0.872547	0.000213	RIKEN cDNA 9630013D21 gene%2C transcript variant 1	NC_000070.7:109509623-109514785	cyclin dependent kinase inhibitor 2C%2C transcript variant 1	NC_000070.7:109518072-109523953	12580	Cdkn2c	3287	up_stream
TCONS_00005316	NM_028142.5	0.969714	0	TCONS_00005316	NC_000070.7:115924138-115932281	NOL1/NOP2/Sun domain family%2C member 4%2C transcript variant 1	NC_000070.7:115890203-115911008	72181	Nsun4	13130	down_stream
TCONS_00005316	NM_153521.2	0.852716	0.000424	TCONS_00005316	NC_000070.7:115924138-115932281	leucine rich repeat containing 41	NC_000070.7:115932465-115954306	230654	Lrrc41	184	up_stream
NR_029450.1	NM_016777.3	-0.765299	0.003723	RIKEN cDNA C530005A16 gene	NC_000070.7:116446929-116454827	nuclear autoantigenic sperm protein (histone-binding)%2C transcript variant 2	NC_000070.7:116458248-116485148	50927	Nasp	3421	up_stream
NR_166471.1	NM_194060.1	0.962111	1e-06	forkhead box O6%2C opposite strand	NC_000070.7:120148329-120161090	forkhead box O6	NC_000070.7:120124274-120144458	329934	Foxo6	3871	down_stream
TCONS_00006188	TCONS_00006178	0.711609	0.009444	TCONS_00006188	NC_000070.7:123539810-123557725	TCONS_00006178	NC_000070.7:123243508-123558475	11426	Macf1	18665	down_stream
NR_003270.2	XM_006538457.5	-0.744658	0.005464	small nucleolar RNA host gene 3	NC_000070.7:132079243-132080997	phosphatase and actin regulator 4%2C transcript variant X2	NC_000070.7:132083232-132125860	100169	Phactr4	2235	up_stream
NR_033566.1	NM_001013780.1	0.82137	0.001052	expressed sequence AI507597	NC_000070.7:141341680-141342915	solute carrier family 25%2C member 34	NC_000070.7:141346134-141351145	384071	Slc25a34	3219	up_stream
NR_033566.1	TCONS_00006406	0.705083	0.010434	expressed sequence AI507597	NC_000070.7:141341680-141342915	TCONS_00006406	NC_000070.7:141353443-141391430	69582	Plekhm2	10528	up_stream
NR_027971.1	NM_026899.3	0.804946	0.001586	ATPase family%2C AAA domain containing 3A%2C opposite strand%2C transcript variant 1	NC_000070.7:155845648-155846717	Ssu72 RNA polymerase II CTD phosphatase homolog (yeast)	NC_000070.7:155789271-155818336	68991	Ssu72	27312	down_stream
NR_030671.1	TCONS_00006548	0.783974	0.002545	expressed sequence AW011738	NC_000070.7:156287740-156290485	TCONS_00006548	NC_000070.7:156249746-156281945	11603	Agrn	5795	down_stream
NR_030671.1	TCONS_00005734	0.718909	0.008422	expressed sequence AW011738	NC_000070.7:156287740-156290485	TCONS_00005734	NC_000070.7:156287740-156298082	74183	Perm1	2745	up_stream
NR_030671.1	NM_198305.2	0.808452	0.001458	expressed sequence AW011738	NC_000070.7:156287740-156290485	kelch-like 17	NC_000070.7:156313500-156319314	231003	Klhl17	23015	up_stream
NR_030700.1	XM_006535689.4	0.748425	0.005108	RIKEN cDNA 4831440E17 gene	NC_000071.7:25704794-25709471	lysine (K)-specific methyltransferase 2C%2C transcript variant X10	NC_000071.7:25477019-25703853	231051	Kmt2c	941	down_stream
XR_376934.4	XM_030254388.1	-0.702585	0.010833	predicted gene%2C 35959	NC_000071.7:44388504-44399504	transmembrane anterior posterior transformation 1%2C transcript variant X2	NC_000071.7:44332495-44383986	231225	Tapt1	4518	down_stream
NR_045500.1	NM_025755.3	0.782949	0.002601	RIKEN cDNA 5730480H06 gene	NC_000071.7:48552914-48571636	PARK2 co-regulated-like	NC_000071.7:48529733-48546098	66768	Pacrgl	6816	down_stream
NR_015537.2	NM_007839.3	0.704938	0.010457	RIKEN cDNA 9230114K14 gene	NC_000071.7:52348022-52355326	DEAH (Asp-Glu-Ala-His) box polypeptide 15%2C transcript variant 2	NC_000071.7:52307544-52347888	13204	Dhx15	134	down_stream
TCONS_00006761	NM_007839.3	0.913506	3.3e-05	TCONS_00006761	NC_000071.7:52348025-52362331	DEAH (Asp-Glu-Ala-His) box polypeptide 15%2C transcript variant 2	NC_000071.7:52307544-52347888	13204	Dhx15	137	down_stream
XR_376977.2	NM_008453.6	0.732116	0.006785	predicted gene%2C 31684	NC_000071.7:64974180-64977093	Kruppel-like factor 3 (basic)%2C transcript variant 1	NC_000071.7:64960863-64990244	16599	Klf3	16064	down_stream
NR_166693.1	NM_001347397.1	0.734506	0.006517	RIKEN cDNA 4833439F03 gene	NC_000071.7:113285677-113288990	RIKEN cDNA 2900026A02 gene%2C transcript variant 1	NC_000071.7:113234188-113286451	243219	2900026A02Rik	774	down_stream
NR_027818.1	NM_001378897.1	0.765776	0.003689	RIKEN cDNA 1500011B03 gene%2C transcript variant 2	NC_000071.7:114950860-114952037	ankyrin repeat domain 13a%2C transcript variant 2	NC_000071.7:114913008-114943882	68420	Ankrd13a	6978	down_stream
XR_004942771.1	NM_029012.2	0.738182	0.00612	uncharacterized LOC118568796	NC_000071.7:115227051-115232293	signal peptide peptidase 3	NC_000071.7:115149582-115236849	74585	Sppl3	9798	down_stream
XR_004942771.1	NM_175352.4	0.780978	0.002711	uncharacterized LOC118568796	NC_000071.7:115227051-115232293	unc-119 lipid binding chaperone B	NC_000071.7:115260624-115273034	106840	Unc119b	28331	up_stream
XR_387611.4	XM_006530202.3	0.719432	0.008352	predicted gene 13840	NC_000071.7:115644933-115654054	paxillin%2C transcript variant X1	NC_000071.7:115644734-115694046	19303	Pxn	9320	down_stream
NR_027810.1	XM_006530500.5	0.771583	0.003288	RIKEN cDNA 1110006O24 gene	NC_000071.7:115769107-115769875	RAB35%2C member RAS oncogene family%2C transcript variant X1	NC_000071.7:115769952-115783798	77407	Rab35	77	up_stream
NR_168130.1	NM_172722.4	-0.776576	0.002971	predicted gene%2C 42020	NC_000071.7:121523575-121524953	N(alpha)-acetyltransferase 25%2C NatB auxiliary subunit	NC_000071.7:121536057-121580472	231713	Naa25	11104	up_stream
NR_033148.1	NM_146164.2	-0.74184	0.005742	predicted gene 20605	NC_000071.7:137627384-137641158	leucine-rich repeats and calponin homology (CH) domain containing 4%2C transcript variant 1	NC_000071.7:137627384-137639361	231798	Lrch4	11977	up_stream
NR_040432.1	NM_025833.3	-0.733841	0.006591	predicted gene 15708	NC_000071.7:144213870-144217324	BAI1-associated protein 2-like 1	NC_000071.7:144201334-144294922	66898	Baiap2l1	15990	down_stream
XR_003956402.1	NM_009169.2	-0.730355	0.006989	predicted gene%2C 52889	NC_000072.7:6561334-6565484	SEM1%2C 26S proteasome complex subunit	NC_000072.7:6558274-6578658	20422	Sem1	7210	down_stream
TCONS_00008835	NM_001352887.1	-0.973596	0	TCONS_00008835	NC_000072.7:13867458-13881506	RIKEN cDNA 2610001J05 gene	NC_000072.7:13867733-13871517	66520	2610001J05Rik	4059	up_stream
XR_377383.3	XM_011241067.2	0.93062	1.1e-05	predicted gene%2C 31103	NC_000072.7:29964454-29968560	striatin interacting protein 2%2C transcript variant X2	NC_000072.7:29916974-29949271	320609	Strip2	15183	down_stream
XR_377383.3	NM_177204.3	0.945991	3e-06	predicted gene%2C 31103	NC_000072.7:29964454-29968560	striatin interacting protein 2%2C transcript variant 1	NC_000072.7:29917011-29959680	320609	Strip2	4774	down_stream
XR_004933673.1	NM_153600.2	0.868996	0.000243	uncharacterized LOC118567381	NC_000072.7:38401135-38409771	tetratricopeptide repeat domain 26	NC_000072.7:38358458-38404582	264134	Ttc26	3447	down_stream
XR_004933804.1	TCONS_00008308	0.78338	0.002577	uncharacterized LOC118567441	NC_000072.7:48404945-48411088	TCONS_00008308	NC_000072.7:48372519-48396476	77827	Krba1	8469	down_stream
XR_377680.4	NM_173406.3	0.857989	0.000357	predicted gene%2C 33097	NC_000072.7:53037073-53045032	JAZF zinc finger 1%2C transcript variant 1	NC_000072.7:52745052-53045609	231986	Jazf1	8536	down_stream
XR_003956309.1	NM_001289740.1	0.920733	2.2e-05	uncharacterized LOC115490354	NC_000072.7:54666119-54675224	maturin%2C neural progenitor differentiation regulator homolog (Xenopus)%2C transcript variant 1	NC_000072.7:54658608-54680840	68235	Mturn	14721	down_stream
XR_001785269.1	NM_001001495.2	0.792383	0.002119	uncharacterized LOC108169147	NC_000072.7:65502318-65554145	TNFAIP3 interacting protein 3	NC_000072.7:65567381-65611024	414084	Tnip3	13236	up_stream
XR_377791.5	NM_001077694.2	0.832214	0.000784	predicted gene%2C 33024%2C transcript variant X1	NC_000072.7:83985879-83989103	dysferlin%2C transcript variant 2	NC_000072.7:83985579-84188041	26903	Dysf	3524	down_stream
XR_377791.5	XM_006506176.3	0.818662	0.001129	predicted gene%2C 33024%2C transcript variant X1	NC_000072.7:83985879-83989103	dysferlin%2C transcript variant X15	NC_000072.7:83996499-84188042	26903	Dysf	7396	up_stream
TCONS_00008559	XM_006505692.5	0.884354	0.000134	TCONS_00008559	NC_000072.7:97784018-97828147	melanogenesis associated transcription factor%2C transcript variant X9	NC_000072.7:97847298-97998321	17342	Mitf	19151	up_stream
TCONS_00008562	XM_036165905.1	0.886408	0.000123	TCONS_00008562	NC_000072.7:97784022-97790132	melanogenesis associated transcription factor%2C transcript variant X14	NC_000072.7:97783965-97998321	17342	Mitf	6167	down_stream
XR_003956495.2	NM_026011.3	0.770888	0.003335	uncharacterized LOC115486328	NC_000072.7:108766924-108789469	ADP-ribosylation factor-like 8B	NC_000072.7:108760019-108800684	67166	Arl8b	29450	down_stream
XR_003956495.2	NM_138677.2	0.83553	0.000714	uncharacterized LOC115486328	NC_000072.7:108766924-108789469	ER degradation enhancer%2C mannosidase alpha-like 1	NC_000072.7:108805601-108836317	192193	Edem1	16132	up_stream
NR_152134.1	NM_001356334.2	0.727851	0.007285	RIKEN cDNA D830050J10 gene	NC_000072.7:115652928-115655328	v-raf-leukemia viral oncogene 1%2C transcript variant 3	NC_000072.7:115595529-115652849	110157	Raf1	79	down_stream
NR_152134.1	XM_006505364.3	0.7222	0.007989	RIKEN cDNA D830050J10 gene	NC_000072.7:115652928-115655328	v-raf-leukemia viral oncogene 1%2C transcript variant X1	NC_000072.7:115595546-115652846	110157	Raf1	82	down_stream
NR_168029.1	NM_001166430.1	0.770524	0.003359	predicted gene%2C 38882%2C transcript variant 1	NC_000072.7:117856593-117861556	heterogeneous nuclear ribonucleoprotein F%2C transcript variant 5	NC_000072.7:117883742-117902583	98758	Hnrnpf	22186	up_stream
NR_168032.1	NM_001170395.1	0.803484	0.001642	predicted gene%2C 52877	NC_000072.7:124289002-124298574	CD163 antigen%2C transcript variant 1	NC_000072.7:124281609-124307486	93671	Cd163	16965	down_stream
NR_168032.1	NM_053094.2	0.783697	0.00256	predicted gene%2C 52877	NC_000072.7:124289002-124298574	CD163 antigen%2C transcript variant 2	NC_000072.7:124281609-124307486	93671	Cd163	16965	down_stream
NR_015604.3	NM_001080557.1	0.773865	0.00314	RIKEN cDNA E130112N10 gene	NC_000072.7:125208231-125216897	vesicle-associated membrane protein 1%2C transcript variant 2	NC_000072.7:125192543-125199269	22317	Vamp1	8962	down_stream
XR_004933850.1	XM_006506805.5	0.719751	0.00831	uncharacterized LOC118567454%2C transcript variant X3	NC_000072.7:129095158-129159758	C-type lectin domain family 2%2C member d%2C transcript variant X1	NC_000072.7:129157738-129163311	93694	Clec2d	2020	up_stream
XR_004933856.1	NM_026371.3	0.769292	0.003442	uncharacterized LOC118567458	NC_000072.7:134677282-134685292	BLOC-1 related complex subunit 5%2C transcript variant 2	NC_000072.7:134617902-134688147	67774	Borcs5	10865	down_stream
XR_003956544.1	NM_009908.2	0.839293	0.00064	uncharacterized LOC115490443	NC_000072.7:142703033-142705580	cytidine monophospho-N-acetylneuraminic acid synthetase	NC_000072.7:142702411-142721440	12764	Cmas	3169	down_stream
NR_157240.1	NM_001163628.1	-0.732102	0.006787	predicted gene 15543	NC_000072.7:145128000-145133356	electron transfer flavoprotein regulatory factor 1%2C transcript variant 1	NC_000072.7:145156859-145162268	67636	Etfrf1	23503	up_stream
NR_157240.1	NM_133688.3	-0.831771	0.000794	predicted gene 15543	NC_000072.7:145128000-145133356	electron transfer flavoprotein regulatory factor 1%2C transcript variant 2	NC_000072.7:145156872-145162268	67636	Etfrf1	23516	up_stream
NR_157240.1	NM_021284.6	-0.892311	9.5e-05	predicted gene 15543	NC_000072.7:145128000-145133356	Kirsten rat sarcoma viral oncogene homolog	NC_000072.7:145162424-145195957	16653	Kras	29068	up_stream
NR_015615.1	NM_001347518.1	0.74641	0.005296	RIKEN cDNA 4732416N19 gene	NC_000072.7:148113785-148137161	transmembrane and tetratricopeptide repeat containing 1%2C transcript variant 2	NC_000072.7:148133927-148345850	387314	Tmtc1	3234	up_stream
XR_004934257.1	NM_019748.3	0.799938	0.001784	uncharacterized LOC118567473	NC_000073.7:16065230-16070612	SUMO1 activating enzyme subunit 1%2C transcript variant 1	NC_000073.7:16060974-16121821	56459	Sae1	9638	down_stream
NR_046001.1	XM_006539713.5	-0.788707	0.002298	RIKEN cDNA 9130221H12 gene	NC_000073.7:24928147-24929689	zinc finger protein 526%2C transcript variant X1	NC_000073.7:24919271-24929688	210172	Zfp526	1541	down_stream
NR_046001.1	NM_175436.5	0.882589	0.000144	RIKEN cDNA 9130221H12 gene	NC_000073.7:24928147-24929689	zinc finger protein 526	NC_000073.7:24920849-24926920	210172	Zfp526	1227	down_stream
XR_881934.3	NM_001167872.1	0.710562	0.009598	predicted gene%2C 31735%2C transcript variant X1	NC_000073.7:29670026-29682938	zinc finger protein 568%2C transcript variant 1	NC_000073.7:29683379-29727707	243905	Zfp568	441	up_stream
NR_166613.1	NM_008155.4	0.790362	0.002216	predicted gene 12758	NC_000073.7:33933801-33939632	glucose-6-phosphate isomerase 1	NC_000073.7:33900751-33929761	14751	Gpi1	4040	down_stream
TCONS_00010546	NM_001382305.1	0.708731	0.009872	TCONS_00010546	NC_000073.7:33985810-34005123	granule associated Rac and RHOG effector 1%2C transcript variant 1	NC_000073.7:33936131-34012972	233103	Garre1	27162	down_stream
TCONS_00009704	NM_198250.1	0.770075	0.003389	TCONS_00009704	NC_000073.7:44131439-44134837	leucine rich repeat containing 4B	NC_000073.7:44091910-44112775	272381	Lrrc4b	18664	down_stream
TCONS_00009704	NM_026690.1	0.796751	0.00192	TCONS_00009704	NC_000073.7:44131439-44134837	aspartate dehydrogenase domain containing	NC_000073.7:44114858-44117175	68352	Aspdh	14264	down_stream
TCONS_00009704	XM_006541071.3	0.834523	0.000735	TCONS_00009704	NC_000073.7:44131439-44134837	Josephin domain containing 2%2C transcript variant X1	NC_000073.7:44117479-44121076	66124	Josd2	10363	down_stream
TCONS_00009705	NM_198250.1	0.846332	0.000518	TCONS_00009705	NC_000073.7:44131440-44134837	leucine rich repeat containing 4B	NC_000073.7:44091910-44112775	272381	Lrrc4b	18665	down_stream
TCONS_00009705	XM_006541071.3	0.781667	0.002672	TCONS_00009705	NC_000073.7:44131440-44134837	Josephin domain containing 2%2C transcript variant X1	NC_000073.7:44117479-44121076	66124	Josd2	10364	down_stream
NR_152217.1	NM_028544.1	0.711955	0.009394	RIKEN cDNA A030001D20 gene	NC_000073.7:45284995-45288182	Ras interacting protein 1	NC_000073.7:45276960-45288516	69903	Rasip1	3521	down_stream
XR_001778126.1	NM_016865.3	0.762869	0.003903	predicted gene%2C 45986	NC_000073.7:49413378-49419910	HIV-1 Tat interactive protein 2%2C transcript variant 1	NC_000073.7:49408853-49423747	53415	Htatip2	10369	down_stream
TCONS_00010808	XM_006508293.5	0.706279	0.010247	TCONS_00010808	NC_000073.7:92370541-92390664	RAB30%2C member RAS oncogene family%2C transcript variant X3	NC_000073.7:92417653-92493743	75985	Rab30	26989	up_stream
XR_869796.3	NM_028243.3	0.915159	3e-05	predicted gene%2C 40448	NC_000073.7:92526595-92539202	prolylcarboxypeptidase (angiotensinase C)	NC_000073.7:92524460-92583789	72461	Prcp	14742	down_stream
XR_378356.4	XM_006507586.5	0.714275	0.009061	predicted gene%2C 33770	NC_000073.7:98479863-98485269	wingless-type MMTV integration site family%2C member 11%2C transcript variant X1	NC_000073.7:98484293-98503022	22411	Wnt11	976	up_stream
NR_163856.1	XM_006507187.5	0.720079	0.008266	predicted gene 5115	NC_000073.7:99578846-99582099	ring finger protein 169%2C transcript variant X2	NC_000073.7:99569460-99630537	108937	Rnf169	12639	down_stream
XR_004934299.1	NM_025846.2	0.88945	0.000108	uncharacterized LOC118567497	NC_000073.7:113688842-113714330	related RAS viral (r-ras) oncogene 2	NC_000073.7:113646016-113717016	66922	Rras2	28174	down_stream
XR_004934228.1	XM_036153248.1	0.823904	0.000984	uncharacterized LOC118567463	NC_000073.7:140896203-140901016	DEAF1%2C transcription factor%2C transcript variant X3	NC_000073.7:140881608-140907916	54006	Deaf1	11713	down_stream
XR_004934228.1	NM_001141950.1	0.700834	0.011119	uncharacterized LOC118567463	NC_000073.7:140896203-140901016	transmembrane protein 80%2C transcript variant 2	NC_000073.7:140908042-140917068	71448	Tmem80	7026	up_stream
XR_378623.5	XM_036153649.1	0.713626	0.009153	predicted gene%2C 32786	NC_000073.7:141666906-141685994	uncharacterized LOC118567495	NC_000073.7:141647866-141650589	118567495	LOC118567495	16317	down_stream
XR_001778498.2	TCONS_00011898	0.72346	0.007828	uncharacterized LOC108167518	NC_000074.7:4377899-4391535	TCONS_00011898	NC_000074.7:4334781-4375087	15568	Elavl1	2812	down_stream
NR_154462.1	NM_026121.3	0.884565	0.000133	predicted gene%2C 17484	NC_000074.7:26244507-26259730	BCL2-associated athanogene 4	NC_000074.7:26254565-26275237	67384	Bag4	5165	up_stream
NR_154462.1	NM_026032.1	0.769588	0.003422	predicted gene%2C 17484	NC_000074.7:26244507-26259730	LSM1 homolog%2C mRNA degradation associated	NC_000074.7:26275618-26294003	67207	Lsm1	15888	up_stream
XR_003947376.2	TCONS_00011985	0.831236	0.000806	predicted gene%2C 51528	NC_000074.7:34410731-34413805	TCONS_00011985	NC_000074.7:34272671-34419891	19663	Rbpms	9160	down_stream
NR_040376.1	NM_001081279.2	0.860157	0.000331	predicted gene%2C 16793	NC_000074.7:36049656-36056174	malignant fibrous histiocytoma amplified sequence 1%2C transcript variant 1	NC_000074.7:36054942-36146603	52065	Mfhas1	1232	up_stream
XR_004935001.1	XM_006509166.5	0.864399	0.000286	uncharacterized LOC118567565	NC_000074.7:37042419-37044182	deleted in liver cancer 1%2C transcript variant X1	NC_000074.7:37034896-37420343	50768	Dlc1	9286	down_stream
TCONS_00011360	TCONS_00011372	0.862372	0.000307	TCONS_00011360	NC_000074.7:46080787-46202552	TCONS_00011372	NC_000074.7:46189189-46280942	234214	Sorbs2	13363	up_stream
TCONS_00011360	TCONS_00011374	0.829631	0.000843	TCONS_00011360	NC_000074.7:46080787-46202552	TCONS_00011374	NC_000074.7:46216244-46280942	234214	Sorbs2	13692	up_stream
TCONS_00011360	TCONS_00011375	0.740168	0.005913	TCONS_00011360	NC_000074.7:46080787-46202552	TCONS_00011375	NC_000074.7:46216244-46280942	234214	Sorbs2	13692	up_stream
TCONS_00012061	NM_010402.4	0.750203	0.004946	TCONS_00012061	NC_000074.7:57757295-57773894	heart and neural crest derivatives expressed 2	NC_000074.7:57774017-57777552	15111	Hand2	123	up_stream
TCONS_00012064	NM_010402.4	0.884215	0.000135	TCONS_00012064	NC_000074.7:57757295-57773894	heart and neural crest derivatives expressed 2	NC_000074.7:57774017-57777552	15111	Hand2	123	up_stream
TCONS_00012065	NM_010402.4	0.853524	0.000413	TCONS_00012065	NC_000074.7:57757295-57773894	heart and neural crest derivatives expressed 2	NC_000074.7:57774017-57777552	15111	Hand2	123	up_stream
TCONS_00012067	NM_010402.4	0.701808	0.010959	TCONS_00012067	NC_000074.7:57757295-57773894	heart and neural crest derivatives expressed 2	NC_000074.7:57774017-57777552	15111	Hand2	123	up_stream
NR_126555.1	NM_008252.3	-0.752032	0.004784	RIKEN cDNA 2500002B13 gene%2C transcript variant 2	NC_000074.7:57940996-57959764	high mobility group box 2%2C transcript variant 2	NC_000074.7:57964876-57969033	97165	Hmgb2	5112	up_stream
NR_126555.1	NM_144731.4	0.772561	0.003224	RIKEN cDNA 2500002B13 gene%2C transcript variant 2	NC_000074.7:57940996-57959764	polypeptide N-acetylgalactosaminyltransferase 7%2C transcript variant 1	NC_000074.7:57976858-58106089	108150	Galnt7	17094	up_stream
XR_379060.3	XM_036153929.1	0.963393	0	predicted gene%2C 32888	NC_000074.7:68305832-68316478	pleckstrin and Sec7 domain containing 3%2C transcript variant X15	NC_000074.7:68331282-68658714	234353	Psd3	14804	up_stream
XR_003947404.1	XM_030243252.2	0.877691	0.000175	predicted gene%2C 51536	NC_000074.7:72995788-72997811	adaptor-related protein complex AP-1%2C mu subunit 1%2C transcript variant X2	NC_000074.7:72994096-73011229	11767	Ap1m1	3715	down_stream
TCONS_00011509	NM_001357279.1	0.725137	0.007617	TCONS_00011509	NC_000074.7:73302289-73313908	transmembrane protein 38A%2C transcript variant 3	NC_000074.7:73325666-73341128	74166	Tmem38a	11758	up_stream
TCONS_00011509	XM_036154325.1	0.717673	0.008589	TCONS_00011509	NC_000074.7:73302289-73313908	transmembrane protein 38A%2C transcript variant X1	NC_000074.7:73325865-73341128	74166	Tmem38a	11957	up_stream
TCONS_00012199	TCONS_00012194	0.777793	0.002898	TCONS_00012199	NC_000074.7:74074124-74080168	TCONS_00012194	NC_000074.7:73541225-74080168	16795	Large1	6044	down_stream
XR_004935038.1	TCONS_00012206	0.819212	0.001113	uncharacterized LOC118567594	NC_000074.7:78091953-78109347	TCONS_00012206	NC_000074.7:78113643-78221908	78514	Arhgap10	4296	up_stream
NR_028125.1	XM_017313016.2	0.701939	0.010938	RIKEN cDNA 0610038B21 gene	NC_000074.7:78243684-78245207	Rho GTPase activating protein 10%2C transcript variant X2	NC_000074.7:77976994-78244628	78514	Arhgap10	944	down_stream
XR_003947564.1	NM_010332.2	0.845606	0.00053	uncharacterized LOC108167319%2C transcript variant X5	NC_000074.7:78450213-78494387	endothelin receptor type A	NC_000074.7:78389657-78451081	13617	Ednra	868	down_stream
TCONS_00012232	TCONS_00012230	0.73839	0.006098	TCONS_00012232	NC_000074.7:81584146-81595193	TCONS_00012230	NC_000074.7:81491066-81602876	14388	Gab1	18730	down_stream
XR_001778601.3	TCONS_00012244	-0.761758	0.003987	RIKEN cDNA D830024N08 gene%2C transcript variant X5	NC_000074.7:84301156-84318428	TCONS_00012244	NC_000074.7:84293370-84301510	106529	Tecr	354	down_stream
XR_001778601.3	NM_025843.3	-0.852775	0.000423	RIKEN cDNA D830024N08 gene%2C transcript variant X5	NC_000074.7:84301156-84318428	NADH:ubiquinone oxidoreductase subunit B7	NC_000074.7:84293386-84298252	66916	Ndufb7	2904	down_stream
XR_001778601.3	TCONS_00012247	-0.776871	0.002953	RIKEN cDNA D830024N08 gene%2C transcript variant X5	NC_000074.7:84301156-84318428	TCONS_00012247	NC_000074.7:84298326-84323126	106529	Tecr	20102	down_stream
TCONS_00011547	NM_027179.1	-0.902808	5.8e-05	TCONS_00011547	NC_000074.7:84302680-84322848	trans-2%2C3-enoyl-CoA reductase%2C transcript variant 2	NC_000074.7:84298326-84321120	106529	Tecr	18440	down_stream
TCONS_00011547	TCONS_00012247	0.807403	0.001495	TCONS_00011547	NC_000074.7:84302680-84322848	TCONS_00012247	NC_000074.7:84298326-84323126	106529	Tecr	20446	down_stream
TCONS_00011550	TCONS_00012247	0.72797	0.007271	TCONS_00011550	NC_000074.7:84302682-84322848	TCONS_00012247	NC_000074.7:84298326-84323126	106529	Tecr	20444	down_stream
XR_003947413.2	NM_134118.5	-0.793379	0.002072	predicted gene%2C 51541	NC_000074.7:84305551-84309931	trans-2%2C3-enoyl-CoA reductase%2C transcript variant 1	NC_000074.7:84298326-84321120	106529	Tecr	11605	down_stream
NR_033641.3	NM_018826.2	0.780902	0.002716	colorectal neoplasia differentially expressed (non-protein coding)%2C transcript variant 1	NC_000074.7:93052658-93082748	Iroquois homeobox 5	NC_000074.7:93084423-93088084	54352	Irx5	1675	up_stream
TCONS_00012351	NM_001142441.1	0.781981	0.002655	TCONS_00012351	NC_000074.7:96534980-96544553	Sin3-associated polypeptide 18B	NC_000074.7:96551983-96552784	100041953	Sap18b	7430	up_stream
XR_001778641.2	NM_145604.3	0.772955	0.003199	expressed sequence AI225912	NC_000074.7:105921229-105928059	RIKEN cDNA D230025D16 gene%2C transcript variant 2	NC_000074.7:105951818-105979685	234678	D230025D16Rik	23759	up_stream
XR_003947446.2	TCONS_00011736	0.798085	0.001862	predicted gene%2C 51546	NC_000074.7:108083310-108084671	TCONS_00011736	NC_000074.7:108020101-108106142	54446	Nfat5	22832	down_stream
XR_388091.4	NM_023395.2	-0.705431	0.01038	predicted gene%2C 32352%2C transcript variant X1	NC_000074.7:120385527-120397678	WAP four-disulfide core domain 1	NC_000074.7:120393103-120414759	67866	Wfdc1	4575	up_stream
XR_003947480.2	XM_036154143.1	0.72616	0.007491	predicted gene%2C 51556	NC_000074.7:121214015-121216407	genetic suppressor element 1%2C coiled-coil protein%2C transcript variant X4	NC_000074.7:121220606-121308116	382034	Gse1	4199	up_stream
NR_045696.1	NM_013914.3	0.776102	0.003	RIKEN cDNA 9330133O14 gene	NC_000074.7:123170394-123173215	snail family zinc finger 3	NC_000074.7:123180943-123187428	30927	Snai3	7728	up_stream
NR_045696.1	NM_001033142.3	0.891012	0.000101	RIKEN cDNA 9330133O14 gene	NC_000074.7:123170394-123173215	ring finger protein 166%2C transcript variant 1	NC_000074.7:123192883-123202813	68718	Rnf166	19668	up_stream
XR_001778719.3	NM_053207.2	0.943478	4e-06	predicted gene%2C 46060	NC_000074.7:125658628-125674964	egl-9 family hypoxia-inducible factor 1%2C transcript variant 1	NC_000074.7:125635325-125675993	112405	Egln1	17365	down_stream
TCONS_00013254	NM_001171147.1	0.780185	0.002757	TCONS_00013254	NC_000075.7:7991902-8000896	yes-associated protein 1%2C transcript variant 1	NC_000075.7:7931999-8004597	22601	Yap1	12695	down_stream
TCONS_00013357	NM_010605.5	0.918204	2.5e-05	TCONS_00013357	NC_000075.7:32242116-32249806	potassium inwardly-rectifying channel%2C subfamily J%2C member 5%2C transcript variant 1	NC_000075.7:32226002-32255640	16521	Kcnj5	13524	down_stream
TCONS_00012708	XM_006510701.5	-0.70418	0.010577	TCONS_00012708	NC_000075.7:44390324-44393468	B cell CLL/lymphoma 9-like%2C transcript variant X2	NC_000075.7:44394488-44421644	80288	Bcl9l	1020	up_stream
XR_004935768.1	NM_022004.6	0.765102	0.003738	uncharacterized LOC118567699	NC_000075.7:45287755-45298970	FXYD domain-containing ion transport regulator 6	NC_000075.7:45281482-45307457	59095	Fxyd6	17488	down_stream
NR_152206.1	NM_008775.3	0.906641	4.8e-05	RIKEN cDNA A830035O19 gene	NC_000075.7:45865283-45867296	platelet-activating factor acetylhydrolase%2C isoform 1b%2C subunit 2%2C transcript variant 5	NC_000075.7:45876608-45896169	18475	Pafah1b2	9312	up_stream
XR_004935778.1	NM_001364543.1	-0.741135	0.005814	uncharacterized LOC118567700	NC_000075.7:48556527-48561069	zinc finger and BTB domain containing 16%2C transcript variant 2	NC_000075.7:48563096-48747525	235320	Zbtb16	2027	up_stream
TCONS_00013460	NM_001364488.1	-0.716463	0.008755	TCONS_00013460	NC_000075.7:50398214-50420208	6-pyruvoyl-tetrahydropterin synthase%2C transcript variant 2	NC_000075.7:50432916-50439956	19286	Pts	12708	up_stream
NR_040714.2	XM_030244139.2	0.774532	0.003098	placenta expressed transcript 1%2C opposite strand	NC_000075.7:50400098-50416105	6-pyruvoyl-tetrahydropterin synthase%2C transcript variant X17	NC_000075.7:50432916-50440017	19286	Pts	16811	up_stream
XR_004935793.1	NM_010729.3	0.763171	0.00388	uncharacterized LOC118567705	NC_000075.7:58227939-58238879	lysyl oxidase-like 1	NC_000075.7:58195005-58220495	16949	Loxl1	7444	down_stream
NR_045640.1	NM_019927.2	0.786094	0.002432	predicted gene%2C 20199	NC_000075.7:59385027-59389024	ariadne RBR E3 ubiquitin protein ligase 1	NC_000075.7:59295836-59393657	23806	Arih1	8630	down_stream
NR_045640.1	XM_006511141.3	0.789022	0.002282	predicted gene%2C 20199	NC_000075.7:59385027-59389024	ariadne RBR E3 ubiquitin protein ligase 1%2C transcript variant X3	NC_000075.7:59297383-59395469	23806	Arih1	10442	down_stream
TCONS_00013555	NM_033607.1	0.740366	0.005892	TCONS_00013555	NC_000075.7:64150529-64160876	ubiquitin carboxyl-terminal esterase L4	NC_000075.7:64142482-64143644	93841	Uchl4	6885	down_stream
NR_040719.1	NM_001039522.1	-0.729698	0.007065	RIKEN cDNA 4933433G15 gene	NC_000075.7:75317465-75322819	Leo1%2C Paf1/RNA polymerase II complex component	NC_000075.7:75348805-75373714	235497	Leo1	25986	up_stream
TCONS_00013643	TCONS_00013620	0.768644	0.003487	TCONS_00013643	NC_000075.7:77139421-77144274	TCONS_00013620	NC_000075.7:77009365-77139343	69642	Mlip	78	down_stream
XR_004935684.1	XM_006511446.5	0.711632	0.009441	predicted gene%2C 51715	NC_000075.7:88465042-88468146	zinc finger protein 949%2C transcript variant X1	NC_000075.7:88430084-88452917	71640	Zfp949	12125	down_stream
XR_003948203.2	NM_001326351.1	0.752895	0.004709	RIKEN cDNA 9430062P05 gene	NC_000075.7:90038511-90042576	a disintegrin-like and metallopeptidase (reprolysin type) with thrombospondin type 1 motif%2C 7%2C transcript variant 4	NC_000075.7:90045030-90082155	108153	Adamts7	2454	up_stream
TCONS_00013015	XM_011242692.3	0.861886	0.000312	TCONS_00013015	NC_000075.7:100525952-100541677	stromal antigen 1%2C transcript variant X8	NC_000075.7:100525500-100785155	20842	Stag1	16177	down_stream
NR_166687.1	NM_019742.4	0.810646	0.001382	predicted gene 9917	NC_000075.7:107436324-107444164	tumor suppressor 2%2C mitochondrial calcium regulator	NC_000075.7:107440453-107443307	80385	Tusc2	3711	up_stream
NR_166687.1	NM_025903.2	0.834935	0.000726	predicted gene 9917	NC_000075.7:107436324-107444164	interferon-related developmental regulator 2	NC_000075.7:107464916-107470237	15983	Ifrd2	20752	up_stream
XR_004935733.1	XM_006511665.5	0.73158	0.006847	uncharacterized LOC118567692	NC_000075.7:107498200-107501637	sema domain%2C immunoglobulin domain (Ig)%2C short basic domain%2C secreted%2C (semaphorin) 3B%2C transcript variant X1	NC_000075.7:107475414-107486437	20347	Sema3b	11763	down_stream
XR_004935733.1	NM_008138.5	0.736561	0.006292	uncharacterized LOC118567692	NC_000075.7:107498200-107501637	guanine nucleotide binding protein (G protein)%2C alpha inhibiting 2	NC_000075.7:107491323-107512542	14678	Gnai2	10314	down_stream
XR_003948252.1	XM_011243022.4	0.932076	1e-05	uncharacterized LOC115487194	NC_000075.7:111045052-111048689	leucine rich repeat (in FLII) interacting protein 2%2C transcript variant X28	NC_000075.7:110946613-111036836	71268	Lrrfip2	8216	down_stream
XR_003948252.1	TCONS_00013146	0.952262	2e-06	uncharacterized LOC115487194	NC_000075.7:111045052-111048689	TCONS_00013146	NC_000075.7:110947191-111053290	71268	Lrrfip2	8238	down_stream
XR_003948252.1	TCONS_00013150	0.928995	1.3e-05	uncharacterized LOC115487194	NC_000075.7:111045052-111048689	TCONS_00013150	NC_000075.7:110947191-111054735	71268	Lrrfip2	9683	down_stream
XR_003948252.1	XM_006512287.4	0.899295	6.9e-05	uncharacterized LOC115487194	NC_000075.7:111045052-111048689	leucine rich repeat (in FLII) interacting protein 2%2C transcript variant X29	NC_000075.7:111010969-111053290	71268	Lrrfip2	8238	down_stream
NR_033503.1	NM_028202.3	0.828016	0.000881	RIKEN cDNA E530011L22 gene	NC_000075.7:121585705-121589009	kelch-like 40	NC_000075.7:121606672-121612885	72330	Klhl40	17663	up_stream
TCONS_00013224	NM_001357775.1	-0.730551	0.006966	TCONS_00013224	NC_000075.7:122004957-122016680	SNF related kinase%2C transcript variant 4	NC_000075.7:121946331-121998768	20623	Snrk	6189	down_stream
NR_015516.3	TCONS_00013241	0.930335	1.1e-05	RIKEN cDNA 4930526I15 gene%2C transcript variant 1	NC_000075.7:124195124-124198447	TCONS_00013241	NC_000075.7:124195473-124202493	19054	Ppp2r3d	2974	up_stream
XR_004936435.1	XM_036156077.1	0.750435	0.004925	predicted gene%2C 26752	NC_000076.7:3306043-3315683	protein phosphatase 1%2C regulatory inhibitor subunit 14C%2C transcript variant X4	NC_000076.7:3315973-3396245	76142	Ppp1r14c	290	up_stream
XR_004936435.1	XM_036156078.1	0.702851	0.01079	predicted gene%2C 26752	NC_000076.7:3306043-3315683	protein phosphatase 1%2C regulatory inhibitor subunit 14C%2C transcript variant X5	NC_000076.7:3316051-3414975	76142	Ppp1r14c	368	up_stream
NR_045008.1	XM_006512823.3	0.96229	1e-06	predicted gene%2C 20300	NC_000076.7:30479190-30482630	histidine triad nucleotide binding protein 3%2C transcript variant X1	NC_000076.7:30479190-30499526	66847	Hint3	3440	down_stream
XR_001779765.2	NM_001376967.1	0.85131	0.000443	predicted gene%2C 38485%2C transcript variant X1	NC_000076.7:42124072-42150198	forkhead box O3%2C transcript variant 1	NC_000076.7:42057840-42152691	56484	Foxo3	28619	down_stream
NR_152766.1	TCONS_00014749	0.707168	0.01011	predicted gene%2C 36173	NC_000076.7:53111282-53136832	TCONS_00014749	NC_000076.7:53149538-53274848	100038725	Cep85l	12706	up_stream
NR_166099.1	NM_153542.1	0.715746	0.008854	RIKEN cDNA D830039M14 gene	NC_000076.7:61311005-61312460	leucine rich repeat containing 20	NC_000076.7:61311611-61418021	216011	Lrrc20	849	up_stream
NR_166111.1	XM_006513990.3	0.816861	0.001182	RIKEN cDNA 1700120B22 gene	NC_000076.7:63078009-63079932	hect domain and RLD 4%2C transcript variant X7	NC_000076.7:63079851-63153658	67345	Herc4	81	up_stream
NR_029447.1	NM_001077363.2	-0.723692	0.007799	RIKEN cDNA E130317F20 gene	NC_000076.7:79687210-79690805	polypyrimidine tract binding protein 1%2C transcript variant 1	NC_000076.7:79690265-79700269	19205	Ptbp1	540	up_stream
NR_015477.1	NM_027120.2	-0.77821	0.002873	ataxia%2C cerebellar%2C Cayman type%2C opposite strand	NC_000076.7:81030524-81044204	nicotinamide riboside kinase 2	NC_000076.7:81034003-81037871	69564	Nmrk2	7347	up_stream
XR_003948919.2	XM_036156139.1	0.751438	0.004836	predicted gene 10777%2C transcript variant X1	NC_000076.7:81832750-81854655	predicted gene 8290	NC_000076.7:81840332-81845916	666790	Gm8290	13166	up_stream
NR_156010.1	NM_001042513.1	-0.821496	0.001049	predicted gene%2C 38560	NC_000076.7:82681048-82694842	thioredoxin reductase 1%2C transcript variant 1	NC_000076.7:82695039-82733558	50493	Txnrd1	197	up_stream
XR_004936518.1	NM_133683.4	0.78679	0.002395	uncharacterized LOC118567850	NC_000076.7:115211008-115212250	transmembrane protein 19%2C transcript variant 2	NC_000076.7:115176643-115198172	67226	Tmem19	12836	down_stream
NR_038026.1	XM_036155883.1	0.707605	0.010043	RIKEN cDNA 4933412E12 gene%2C transcript variant 2	NC_000076.7:116786466-116799184	bestrophin 3%2C transcript variant X5	NC_000076.7:116822637-116859796	382427	Best3	23453	up_stream
XR_001779656.3	XM_006513766.4	0.758781	0.004219	predicted gene 4473	NC_000076.7:120734933-120740581	methionine sulfoxide reductase B3%2C transcript variant X1	NC_000076.7:120617867-120734916	320183	Msrb3	17	down_stream
NR_040660.1	NM_009870.4	-0.715895	0.008834	RIKEN cDNA A730063M14 gene	NC_000076.7:126906349-126906970	cyclin-dependent kinase 4%2C transcript variant 1	NC_000076.7:126899403-126903157	12567	Cdk4	3192	down_stream
NR_131150.1	NM_001317217.1	-0.821317	0.001054	Riken cDNA A430046D13 gene%2C transcript variant 1	NC_000076.7:128335115-128340111	myosin%2C light polypeptide 6%2C alkali%2C smooth muscle and non-muscle%2C transcript variant 1	NC_000076.7:128326727-128329755	17904	Myl6	5360	down_stream
NR_131150.1	XM_036155669.1	-0.79905	0.001821	Riken cDNA A430046D13 gene%2C transcript variant 1	NC_000076.7:128335115-128340111	myosin%2C light polypeptide 6%2C alkali%2C smooth muscle and non-muscle%2C transcript variant X1	NC_000076.7:128326729-128329742	17904	Myl6	5373	down_stream
NR_131151.1	NM_172259.1	0.753673	0.004642	Riken cDNA A430046D13 gene%2C transcript variant 2	NC_000076.7:128335115-128340111	myosin%2C light polypeptide 6B	NC_000076.7:128330025-128334554	216459	Myl6b	561	down_stream
NR_045708.1	NM_019574.3	0.796432	0.001934	predicted gene 11944	NC_000077.7:3258999-3270722	POZ (BTB) and AT hook containing zinc finger 1%2C transcript variant 1	NC_000077.7:3240456-3259083	56218	Patz1	84	down_stream
NR_002322.2	XM_036157052.1	0.711176	0.009508	taurine upregulated gene 1%2C transcript variant b	NC_000077.7:3589784-3597536	microrchidia 2A%2C transcript variant X3	NC_000077.7:3599283-3640477	74522	Morc2a	1747	up_stream
NR_002322.2	NM_001159288.2	-0.727812	0.00729	taurine upregulated gene 1%2C transcript variant b	NC_000077.7:3589784-3597536	microrchidia 2A%2C transcript variant 1	NC_000077.7:3599436-3640477	74522	Morc2a	1900	up_stream
NR_166847.1	NM_001287386.1	0.902931	5.8e-05	predicted gene 11967	NC_000077.7:5865266-5866762	glucokinase%2C transcript variant 2	NC_000077.7:5850819-5865135	103988	Gck	131	down_stream
TCONS_00015278	NM_023324.2	0.819332	0.00111	TCONS_00015278	NC_000077.7:21041323-21050616	pellino 1	NC_000077.7:21041323-21100327	67245	Peli1	9293	down_stream
XR_004937163.1	XM_006514601.3	0.721463	0.008085	uncharacterized LOC118567904	NC_000077.7:30148676-30163615	spectrin beta%2C non-erythrocytic 1%2C transcript variant X4	NC_000077.7:30049394-30148599	20742	Sptbn1	77	down_stream
XR_004937163.1	NM_175836.2	0.76727	0.003583	uncharacterized LOC118567904	NC_000077.7:30148676-30163615	spectrin beta%2C non-erythrocytic 1%2C transcript variant 1	NC_000077.7:30049394-30169772	20742	Sptbn1	21096	down_stream
XR_003949666.1	NM_028862.4	0.735616	0.006395	predicted gene%2C 51891	NC_000077.7:44422218-44430777	ring finger protein 145%2C transcript variant 1	NC_000077.7:44409782-44456347	74315	Rnf145	20995	down_stream
XR_003949666.1	NM_001166553.1	0.815462	0.001225	predicted gene%2C 51891	NC_000077.7:44422218-44430777	ring finger protein 145%2C transcript variant 2	NC_000077.7:44410203-44445804	74315	Rnf145	20574	down_stream
XR_388617.4	NM_001163671.1	0.759476	0.004164	predicted gene%2C 36507	NC_000077.7:49680251-49714608	mitogen-activated protein kinase 9%2C transcript variant beta2	NC_000077.7:49737577-49777248	26420	Mapk9	22969	up_stream
XR_388617.4	NM_016961.3	0.724567	0.007688	predicted gene%2C 36507	NC_000077.7:49680251-49714608	mitogen-activated protein kinase 9%2C transcript variant beta1	NC_000077.7:49737577-49777248	26420	Mapk9	22969	up_stream
XR_388617.4	NM_207692.2	0.712619	0.009298	predicted gene%2C 36507	NC_000077.7:49680251-49714608	mitogen-activated protein kinase 9%2C transcript variant alpha2	NC_000077.7:49737577-49777248	26420	Mapk9	22969	up_stream
NR_033332.1	NM_008390.2	0.827471	0.000894	predicted gene 12216	NC_000077.7:53676314-53750082	interferon regulatory factor 1%2C transcript variant 1	NC_000077.7:53660840-53668150	16362	Irf1	8164	down_stream
XR_004937261.1	NM_001033597.1	0.764341	0.003793	predicted gene 12224%2C transcript variant X2	NC_000077.7:54231167-54244101	acyl-CoA synthetase long-chain family member 6%2C transcript variant 2	NC_000077.7:54195029-54252365	216739	Acsl6	21198	down_stream
XR_003949683.1	NM_028451.1	0.704653	0.010502	predicted gene%2C 51897	NC_000077.7:57918494-57928849	La ribonucleoprotein domain family%2C member 1	NC_000077.7:57899889-57952860	73158	Larp1	28960	down_stream
XR_003949683.1	TCONS_00015465	0.711035	0.009529	predicted gene%2C 51897	NC_000077.7:57918494-57928849	TCONS_00015465	NC_000077.7:57899889-57952860	73158	Larp1	28960	down_stream
NR_037964.1	NM_008193.3	0.779592	0.002791	RIKEN cDNA 2610507I01 gene	NC_000077.7:59088618-59093257	guanylate kinase 1%2C transcript variant 1	NC_000077.7:59074680-59082778	14923	Guk1	5840	down_stream
NR_037964.1	NM_001302336.2	-0.837397	0.000677	RIKEN cDNA 2610507I01 gene	NC_000077.7:59088618-59093257	mitochondrial ribosomal protein L55%2C transcript variant 3	NC_000077.7:59093311-59096964	67212	Mrpl55	54	up_stream
NR_037964.1	TCONS_00015494	0.746711	0.005268	RIKEN cDNA 2610507I01 gene	NC_000077.7:59088618-59093257	TCONS_00015494	NC_000077.7:59099186-59119128	67862	2310033P09Rik	5929	up_stream
NR_037964.1	NM_001130408.1	0.745748	0.005359	RIKEN cDNA 2610507I01 gene	NC_000077.7:59088618-59093257	ADP-ribosylation factor 1%2C transcript variant 1	NC_000077.7:59102237-59118988	11840	Arf1	8980	up_stream
NR_045686.1	NM_001368931.1	-0.714016	0.009098	predicted gene 16062	NC_000077.7:59700905-59709188	myosin phosphatase Rho interacting protein%2C transcript variant 3	NC_000077.7:59553332-59671688	26936	Mprip	29217	down_stream
NR_045686.1	TCONS_00016553	0.745181	0.005414	predicted gene 16062	NC_000077.7:59700905-59709188	TCONS_00016553	NC_000077.7:59708629-59767162	26572	Cops3	559	up_stream
TCONS_00016565	NM_172943.4	0.937512	7e-06	TCONS_00016565	NC_000077.7:60469738-60476828	alkB homolog 5%2C RNA demethylase	NC_000077.7:60428508-60449338	268420	Alkbh5	20400	down_stream
NR_027800.1	NM_025294.5	-0.713443	0.009179	mitogen-activated protein kinase kinase 3%2C opposite strand	NC_000077.7:60811766-60822693	N-acetyltransferase domain containing 1	NC_000077.7:60793071-60804618	24083	Natd1	7148	down_stream
NR_027800.1	NM_008928.5	0.801747	0.001711	mitogen-activated protein kinase kinase 3%2C opposite strand	NC_000077.7:60811766-60822693	mitogen-activated protein kinase kinase 3%2C transcript variant 1	NC_000077.7:60822879-60843637	26397	Map2k3	186	up_stream
NR_030738.1	NM_001382489.1	-0.969525	0	RIKEN cDNA 2410006H16 gene	NC_000077.7:62493702-62495632	transient receptor potential cation channel%2C subfamily V%2C member 2%2C transcript variant 2	NC_000077.7:62466452-62491129	22368	Trpv2	2573	down_stream
TCONS_00015559	TCONS_00016627	0.901109	6.3e-05	TCONS_00015559	NC_000077.7:68290348-68291994	TCONS_00016627	NC_000077.7:68100189-68291497	18208	Ntn1	1149	down_stream
XR_003949712.2	NM_025985.4	0.73439	0.00653	predicted gene%2C 51906%2C transcript variant X2	NC_000077.7:72454632-72497849	ubiquitin-conjugating enzyme E2G 1	NC_000077.7:72498086-72577307	67128	Ube2g1	237	up_stream
NR_030711.1	NM_138659.2	0.805739	0.001556	Mir22 host gene (non-protein coding)	NC_000077.7:75352364-75357516	pre-mRNA processing factor 8	NC_000077.7:75377602-75400273	192159	Prpf8	20086	up_stream
NR_167696.1	NM_183201.4	0.721518	0.008078	unc-45 myosin chaperone B%2C opposite strand	NC_000077.7:82815726-82824209	schlafen 5	NC_000077.7:82842927-82855676	327978	Slfn5	18718	up_stream
NR_167696.1	TCONS_00015770	0.913112	3.4e-05	unc-45 myosin chaperone B%2C opposite strand	NC_000077.7:82815726-82824209	TCONS_00015770	NC_000077.7:82843748-82855676	327978	Slfn5	19539	up_stream
NR_015519.1	TCONS_00015772	0.801558	0.001718	expressed sequence AI662270	NC_000077.7:83114401-83117410	TCONS_00015772	NC_000077.7:83082171-83109916	20557	Slfn3	4485	down_stream
TCONS_00016814	NM_145433.1	0.768207	0.003517	TCONS_00016814	NC_000077.7:84711553-84719829	mitochondrial rRNA methyltransferase 1	NC_000077.7:84703886-84710341	217038	Mrm1	1212	down_stream
TCONS_00016814	NM_177564.5	0.795288	0.001985	TCONS_00016814	NC_000077.7:84711553-84719829	dehydrogenase/reductase (SDR family) member 11	NC_000077.7:84711553-84719829	192970	Dhrs11	8276	down_stream
NR_102396.1	NM_001362852.1	0.748268	0.005123	RIKEN cDNA C130046K22 gene%2C transcript variant 3	NC_000077.7:103588549-103596495	golgi SNAP receptor complex member 2%2C transcript variant 2	NC_000077.7:103567674-103588549	56494	Gosr2	0	down_stream
NR_168513.1	XM_036157104.1	-0.784776	0.002502	predicted gene%2C 36220	NC_000077.7:106391740-106392037	endoplasmic reticulum (ER) to nucleus signalling 1%2C transcript variant X1	NC_000077.7:106285473-106378701	78943	Ern1	13039	down_stream
TCONS_00016044	NM_133702.3	-0.721367	0.008097	TCONS_00016044	NC_000077.7:107092721-107096665	nucleolar protein 11%2C transcript variant 1	NC_000077.7:107057476-107080207	68979	Nol11	12514	down_stream
TCONS_00016045	NM_133702.3	-0.731076	0.006905	TCONS_00016045	NC_000077.7:107092721-107097137	nucleolar protein 11%2C transcript variant 1	NC_000077.7:107057476-107080207	68979	Nol11	12514	down_stream
NR_038097.1	NM_001359034.1	0.70293	0.010777	predicted gene 11696%2C transcript variant 1	NC_000077.7:109245603-109254480	guanine nucleotide binding protein%2C alpha 13%2C transcript variant 2	NC_000077.7:109253656-109271301	14674	Gna13	824	up_stream
XR_880285.1	NM_001373912.1	0.854352	0.000402	predicted gene%2C 39443	NC_000077.7:109544793-109547619	protein kinase%2C cAMP dependent regulatory%2C type I%2C alpha%2C transcript variant 7	NC_000077.7:109541367-109560489	19084	Prkar1a	6252	down_stream
NR_027821.1	NM_030206.4	0.794474	0.002022	small nucleolar RNA host gene 16%2C transcript variant 3	NC_000077.7:116562485-116566624	cytoglobin	NC_000077.7:116536420-116545139	114886	Cygb	17346	down_stream
NR_165823.1	TCONS_00017246	0.700665	0.011147	predicted gene%2C 17586	NC_000077.7:120524575-120528928	TCONS_00017246	NC_000077.7:120515942-120524373	17134	Mafg	202	down_stream
NR_165823.1	NM_026751.1	0.757942	0.004287	predicted gene%2C 17586	NC_000077.7:120524575-120528928	myeloid-associated differentiation marker-like 2%2C transcript variant 1	NC_000077.7:120536856-120539163	68515	Myadml2	7928	up_stream
NR_030694.1	XM_036157773.1	0.828091	0.000879	RIKEN cDNA 1110002L01 gene	NC_000078.7:3453882-3476747	predicted gene%2C 31332	NC_000078.7:3486491-3492403	102633525	Gm31332	9744	up_stream
NR_169069.1	NM_001198968.2	0.71736	0.008632	predicted gene 3625	NC_000078.7:4639794-4643731	intersectin 2%2C transcript variant 1	NC_000078.7:4643007-4763952	20403	Itsn2	724	up_stream
NR_169069.1	NM_011365.4	0.773667	0.003153	predicted gene 3625	NC_000078.7:4639794-4643731	intersectin 2%2C transcript variant 2	NC_000078.7:4643007-4763952	20403	Itsn2	724	up_stream
NR_169069.1	XM_006515025.5	-0.782735	0.002613	predicted gene 3625	NC_000078.7:4639794-4643731	intersectin 2%2C transcript variant X4	NC_000078.7:4643156-4763690	20403	Itsn2	575	up_stream
XR_004937682.1	NM_015763.4	-0.703806	0.010637	uncharacterized LOC118567986	NC_000078.7:16513380-16565322	lipin 1%2C transcript variant 2	NC_000078.7:16585669-16639771	14245	Lpin1	20347	up_stream
XR_004937682.1	XM_036157191.1	0.798256	0.001855	uncharacterized LOC118567986	NC_000078.7:16513380-16565322	lipin 1%2C transcript variant X14	NC_000078.7:16585954-16639790	14245	Lpin1	20632	up_stream
XR_004937682.1	XM_036157193.1	0.756183	0.00443	uncharacterized LOC118567986	NC_000078.7:16513380-16565322	lipin 1%2C transcript variant X16	NC_000078.7:16586027-16639791	14245	Lpin1	20705	up_stream
NR_045032.2	NM_021524.2	0.871451	0.000222	ganglioside-induced differentiation-associated-protein 10	NC_000078.7:32874114-32876918	nicotinamide phosphoribosyltransferase	NC_000078.7:32870333-32903368	59027	Nampt	6585	down_stream
TCONS_00017850	NM_008584.4	0.743423	0.005585	TCONS_00017850	NC_000078.7:37142976-37156740	mesenchyme homeobox 2	NC_000078.7:37158538-37229533	17286	Meox2	1798	up_stream
NR_033222.1	NM_025589.4	-0.826333	0.000922	RIKEN cDNA 9330151L19 gene	NC_000078.7:69243984-69246642	ribosomal protein L36A-like	NC_000078.7:69229507-69230841	66483	Rpl36al	13143	down_stream
NR_033222.1	NM_146035.2	0.846254	0.00052	RIKEN cDNA 9330151L19 gene	NC_000078.7:69243984-69246642	mannoside acetylglucosaminyltransferase 2	NC_000078.7:69230931-69233547	217664	Mgat2	10437	down_stream
XR_003950198.1	NM_008856.4	-0.826361	0.000921	predicted gene%2C 34189%2C transcript variant X3	NC_000078.7:73820033-73828940	protein kinase C%2C eta%2C transcript variant 1	NC_000078.7:73631569-73824959	18755	Prkch	4926	down_stream
TCONS_00017946	XM_006515927.5	0.849853	0.000464	TCONS_00017946	NC_000078.7:75579415-75638028	protein phosphatase 2%2C regulatory subunit B'%2C epsilon%2C transcript variant X3	NC_000078.7:75496236-75597974	26932	Ppp2r5e	18559	down_stream
TCONS_00017573	XM_036157587.1	0.739315	0.006001	TCONS_00017573	NC_000078.7:83583632-83688237	RNA binding motif protein 25%2C transcript variant X4	NC_000078.7:83679350-83729901	67039	Rbm25	8887	up_stream
NR_033340.1	NM_001364204.1	0.728351	0.007225	RIKEN cDNA B930059L03 gene	NC_000078.7:110557807-110559113	protein phosphatase 2%2C regulatory subunit B'%2C gamma%2C transcript variant 5	NC_000078.7:110413657-110549509	26931	Ppp2r5c	8298	down_stream
NR_033340.1	NM_001364206.1	0.748926	0.005062	RIKEN cDNA B930059L03 gene	NC_000078.7:110557807-110559113	protein phosphatase 2%2C regulatory subunit B'%2C gamma%2C transcript variant 8	NC_000078.7:110452230-110549509	26931	Ppp2r5c	8298	down_stream
NR_033340.1	NM_001364209.1	0.756618	0.004394	RIKEN cDNA B930059L03 gene	NC_000078.7:110557807-110559113	protein phosphatase 2%2C regulatory subunit B'%2C gamma%2C transcript variant 11	NC_000078.7:110452230-110549509	26931	Ppp2r5c	8298	down_stream
NR_045170.1	XM_006516661.4	0.745622	0.005371	predicted gene 10336	NC_000079.7:12197602-12201374	5-methyltetrahydrofolate-homocysteine methyltransferase%2C transcript variant X1	NC_000079.7:12196216-12273075	238505	Mtr	5158	down_stream
NR_045170.1	TCONS_00018645	0.980964	0	predicted gene 10336	NC_000079.7:12197602-12201374	TCONS_00018645	NC_000079.7:12201423-12215398	238505	Mtr	49	up_stream
NR_045170.1	NM_001081128.3	0.829663	0.000842	predicted gene 10336	NC_000079.7:12197602-12201374	5-methyltetrahydrofolate-homocysteine methyltransferase	NC_000079.7:12201423-12272999	238505	Mtr	49	up_stream
TCONS_00018186	XM_036158275.1	0.891708	9.8e-05	TCONS_00018186	NC_000079.7:13117137-13421107	predicted gene 2423	NC_000079.7:13406077-13407553	100039786	Gm2423	15030	up_stream
TCONS_00018188	TCONS_00018182	0.770146	0.003384	TCONS_00018188	NC_000079.7:13120765-13427058	TCONS_00018182	NC_000079.7:12717150-13120685	118567336	LOC118567336	80	down_stream
TCONS_00018188	XM_036158275.1	0.708213	0.00995	TCONS_00018188	NC_000079.7:13120765-13427058	predicted gene 2423	NC_000079.7:13406077-13407553	100039786	Gm2423	20981	up_stream
XR_004938083.1	NM_134065.4	0.891366	9.9e-05	uncharacterized LOC118568031	NC_000079.7:19793952-19800071	ependymin related protein 1 (zebrafish)	NC_000079.7:19775877-19804000	105298	Epdr1	10048	down_stream
NR_040707.1	NM_009254.3	-0.855865	0.000383	RIKEN cDNA 1110046J04 gene	NC_000079.7:34120014-34144164	serine (or cysteine) peptidase inhibitor%2C clade B%2C member 6a%2C transcript variant 2	NC_000079.7:34101900-34120066	20719	Serpinb6a	52	down_stream
NR_040707.1	NM_001163241.1	0.702279	0.010883	RIKEN cDNA 1110046J04 gene	NC_000079.7:34120014-34144164	N-ribosyldihydronicotinamide quinone reductase 2%2C transcript variant 2	NC_000079.7:34148641-34172448	18105	Nqo2	4477	up_stream
NR_015601.1	NM_001033268.3	-0.94429	4e-06	family with sequence similarity 120A%2C opposite strand	NC_000079.7:49121587-49123381	family with sequence similarity 120%2C member A	NC_000079.7:49032691-49121536	218236	Fam120a	51	down_stream
NR_045794.1	NM_001289926.1	0.793112	0.002084	predicted gene%2C 16907	NC_000079.7:63436967-63444961	aminopeptidase O%2C transcript variant 2	NC_000079.7:63112706-63450691	72061	Aopep	13724	down_stream
TCONS_00018915	NM_019986.3	-0.755321	0.004502	TCONS_00018915	NC_000079.7:64294253-64300249	hyaluronic acid binding protein 4	NC_000079.7:64309679-64334351	56541	Habp4	9430	up_stream
TCONS_00018948	NM_018885.2	0.719123	0.008393	TCONS_00018948	NC_000079.7:73411058-73412786	Iroquois homeobox 4	NC_000079.7:73408615-73417739	50916	Irx4	4171	down_stream
XR_004938195.1	NM_146231.2	-0.78695	0.002387	RIKEN cDNA E430024I08 gene%2C transcript variant X1	NC_000079.7:74585712-74611253	zinc finger protein 825%2C transcript variant 2	NC_000079.7:74626496-74642080	235956	Zfp825	15243	up_stream
NR_028314.1	XM_036158127.1	-0.77569	0.003026	RIKEN cDNA 4833422C13 gene%2C transcript variant 2	NC_000079.7:91861726-91889991	single-stranded DNA binding protein 2%2C transcript variant X18	NC_000079.7:91619468-91849364	66970	Ssbp2	12362	down_stream
NR_027974.1	TCONS_00018590	0.816643	0.001189	RIKEN cDNA 3110070M22 gene	NC_000079.7:119623792-119624920	TCONS_00018590	NC_000079.7:119565437-119596859	218693	Paip1	26933	down_stream
NR_168021.1	NM_001302966.1	0.966522	0	predicted gene%2C 36161	NC_000079.7:120471877-120480467	predicted gene%2C 21188	NC_000079.7:120496140-120513740	100861753	Gm21188	15673	up_stream
XR_874229.4	NM_009455.3	0.733526	0.006626	predicted gene%2C 41098	NC_000080.7:4157801-4172018	ubiquitin-conjugating enzyme E2E 1	NC_000080.7:4137851-4186967	22194	Ube2e1	29166	down_stream
XR_003951200.2	NM_001113417.1	0.920985	2.1e-05	predicted gene%2C 32269	NC_000080.7:4837050-4871309	thyroid hormone receptor beta%2C transcript variant 1	NC_000080.7:4431607-4808736	21834	Thrb	28314	down_stream
XR_003951210.2	NM_001081247.2	0.853727	0.00041	predicted gene%2C 47814	NC_000080.7:24488628-24496358	polymerase (RNA) III (DNA directed) polypeptide A	NC_000080.7:24498761-24537126	218832	Polr3a	2403	up_stream
NR_033492.1	NM_001309430.1	0.788781	0.002294	RIKEN cDNA 4931406H21 gene	NC_000080.7:25587227-25591085	predicted gene%2C 45915	NC_000080.7:25603936-25606060	100188919	Gm45915	12851	up_stream
TCONS_00019255	NM_172254.4	-0.70732	0.010087	TCONS_00019255	NC_000080.7:31837267-31842406	diphthamine biosynthesis 3%2C transcript variant 1	NC_000080.7:31802473-31807649	105638	Dph3	29618	down_stream
XR_383344.5	XM_036158329.1	0.778733	0.002842	predicted gene 28651%2C transcript variant X2	NC_000080.7:32407589-32411207	RIKEN cDNA 3425401B19 gene%2C transcript variant X4	NC_000080.7:32381074-32429787	100504518	3425401B19Rik	22198	down_stream
XR_003950992.1	TCONS_00019407	0.87098	0.000226	predicted gene%2C 52092	NC_000080.7:55188496-55192424	TCONS_00019407	NC_000080.7:55178482-55261803	68966	Ngdn	13942	down_stream
XR_003950992.1	XM_036158456.1	-0.732175	0.006779	predicted gene%2C 52092	NC_000080.7:55188496-55192424	myosin%2C heavy polypeptide 7%2C cardiac muscle%2C beta%2C transcript variant X2	NC_000080.7:55208140-55232000	140781	Myh7	15716	up_stream
XR_004938650.1	TCONS_00019889	0.769151	0.003452	predicted gene%2C 31251%2C transcript variant X2	NC_000080.7:55213475-55228616	TCONS_00019889	NC_000080.7:55179381-55232000	140781	Myh7	18525	down_stream
XR_003951005.1	NM_026403.3	0.790634	0.002202	predicted gene%2C 32092%2C transcript variant X2	NC_000080.7:56021535-56031238	NOP9 nucleolar protein	NC_000080.7:55983149-55993091	67842	Nop9	28444	down_stream
XR_874691.3	NM_007798.3	0.717838	0.008567	predicted gene%2C 36025%2C transcript variant X1	NC_000080.7:63329506-63341872	cathepsin B	NC_000080.7:63359910-63383372	13030	Ctsb	18038	up_stream
XR_004938674.1	TCONS_00019995	0.709762	0.009717	uncharacterized LOC118567338	NC_000080.7:69496109-69516796	TCONS_00019995	NC_000080.7:69478791-69522552	67712	Slc25a37	26443	down_stream
XR_004938681.1	NM_001359159.1	0.820334	0.001081	predicted gene 27177%2C transcript variant X1	NC_000080.7:69807055-69877918	ectonucleoside triphosphate diphosphohydrolase 4B%2C transcript variant 1	NC_000080.7:69792849-69822389	100862375	Entpd4b	15334	down_stream
XR_004938681.1	NM_001359160.1	0.833485	0.000757	predicted gene 27177%2C transcript variant X1	NC_000080.7:69807055-69877918	ectonucleoside triphosphate diphosphohydrolase 4B%2C transcript variant 2	NC_000080.7:69792849-69822389	100862375	Entpd4b	15334	down_stream
NR_130166.1	NM_001301652.1	0.748398	0.005111	RIKEN cDNA 4930480K23 gene%2C transcript variant 1	NC_000080.7:69970232-69983318	R3H domain and coiled-coil containing 1%2C transcript variant 3	NC_000080.7:69934752-69944942	71843	R3hcc1	25290	down_stream
NR_130166.1	NM_134078.4	0.886934	0.00012	RIKEN cDNA 4930480K23 gene%2C transcript variant 1	NC_000080.7:69970232-69983318	charged multivesicular body protein 7	NC_000080.7:69954427-69970019	105513	Chmp7	213	down_stream
NR_166861.1	XM_036158383.1	0.821709	0.001043	predicted gene%2C 34758	NC_000080.7:103584334-103597918	MYC binding protein 2%2C E3 ubiquitin protein ligase%2C transcript variant X34	NC_000080.7:103350846-103584271	105689	Mycbp2	63	down_stream
NR_045065.1	XM_006520190.4	0.706749	0.010175	RIKEN cDNA 4930556M19 gene%2C transcript variant 3	NC_000081.7:10714985-10722297	retinoic acid induced 14%2C transcript variant X4	NC_000081.7:10569056-10714807	75646	Rai14	178	down_stream
XR_875387.3	NM_001356582.1	0.884148	0.000135	predicted gene%2C 41338%2C transcript variant X1	NC_000081.7:65660179-65665005	EFR3 homolog A%2C transcript variant 2	NC_000081.7:65658868-65745661	76740	Efr3a	6137	down_stream
XR_875387.3	NM_133766.4	0.899564	6.8e-05	predicted gene%2C 41338%2C transcript variant X1	NC_000081.7:65660179-65665005	EFR3 homolog A%2C transcript variant 1	NC_000081.7:65658868-65745661	76740	Efr3a	6137	down_stream
XR_875429.3	NM_001271419.1	0.700578	0.011161	predicted gene%2C 41348	NC_000081.7:74863846-74866308	lymphocyte antigen 6 complex%2C locus A%2C transcript variant 5	NC_000081.7:74866725-74869880	110454	Ly6a	417	up_stream
XR_003951583.1	NM_001081166.2	0.70202	0.010925	predicted gene%2C 52202	NC_000081.7:84671918-84675258	PHD finger protein 21B%2C transcript variant 1	NC_000081.7:84669576-84740330	271305	Phf21b	5682	down_stream
TCONS_00020457	NM_011144.6	0.81884	0.001124	TCONS_00020457	NC_000081.7:85552512-85591725	peroxisome proliferator activated receptor alpha%2C transcript variant 1	NC_000081.7:85619976-85691052	19013	Ppara	28251	up_stream
NR_030690.1	XM_011245785.4	0.918613	2.5e-05	RIKEN cDNA E330033B04 gene	NC_000081.7:96166444-96173156	predicted gene%2C 38469%2C transcript variant X1	NC_000081.7:96032697-96185141	102634841	Gm38469	18697	down_stream
NR_028442.1	NM_001368702.1	0.849008	0.000477	RIKEN cDNA 9330020H09 gene	NC_000081.7:98465204-98468745	cyclin T1%2C transcript variant 2	NC_000081.7:98457691-98465617	12455	Ccnt1	413	down_stream
NR_045701.1	NM_001033872.2	0.716269	0.008782	RIKEN cDNA C330013E15 gene	NC_000081.7:100512020-100512991	small cell adhesion glycoprotein%2C transcript variant 2	NC_000081.7:100519219-100534821	207818	Smagp	6228	up_stream
XR_004939051.1	XM_006520692.3	-0.745581	0.005375	uncharacterized LOC118568226	NC_000081.7:102005650-102014682	tensin 2%2C transcript variant X3	NC_000081.7:102008801-102024836	209039	Tns2	5881	up_stream
XR_384632.4	NM_001379015.1	0.719201	0.008383	predicted gene%2C 36681	NC_000082.7:4768631-4773308	mahogunin%2C ring finger 1%2C transcript variant 8	NC_000082.7:4704113-4752954	17237	Mgrn1	15677	down_stream
XR_003951966.2	NM_021428.4	0.814208	0.001265	uncharacterized LOC115488669	NC_000082.7:10320436-10336161	dexamethasone-induced transcript	NC_000082.7:10348070-10360918	58239	Dexi	11909	up_stream
XR_003951966.2	TCONS_00021187	0.74409	0.005519	uncharacterized LOC115488669	NC_000082.7:10320436-10336161	TCONS_00021187	NC_000082.7:10363202-10450928	74374	Clec16a	27041	up_stream
NR_037997.2	XM_036160156.1	0.753877	0.004624	RIKEN cDNA 2310015D24 gene%2C transcript variant 2	NC_000082.7:13331994-13338283	poly(A)-specific ribonuclease (deadenylation nuclease)%2C transcript variant X4	NC_000082.7:13355833-13486035	74108	Parn	17550	up_stream
NR_037957.1	NM_023737.3	0.737192	0.006225	RIKEN cDNA 1300002E11 gene%2C transcript variant 1	NC_000082.7:21613096-21624875	enoyl-Coenzyme A%2C hydratase/3-hydroxyacyl Coenzyme A dehydrogenase	NC_000082.7:21580034-21606584	74147	Ehhadh	6512	down_stream
XR_003951853.2	TCONS_00021819	0.837189	0.000681	predicted gene%2C 30445	NC_000082.7:44539461-44544651	TCONS_00021819	NC_000082.7:44544723-44566726	66067	Gtpbp8	72	up_stream
NR_027965.1	NM_024218.4	0.764084	0.003812	zinc finger and BTB domain containing 11%2C opposite strand 1	NC_000082.7:55793630-55794980	ribosomal protein L24	NC_000082.7:55786637-55791800	68193	Rpl24	1830	down_stream
XR_004939287.1	NM_001177871.1	-0.700677	0.011145	uncharacterized LOC118568244	NC_000082.7:57369962-57382205	filamin A interacting protein 1-like%2C transcript variant 2	NC_000082.7:57369604-57393167	78749	Filip1l	12601	down_stream
TCONS_00021910	NM_001198825.1	0.744591	0.005471	TCONS_00021910	NC_000082.7:84946445-84949585	amyloid beta (A4) precursor protein%2C transcript variant 5	NC_000082.7:84751323-84970595	11820	App	24150	down_stream
TCONS_00021910	XM_006522874.3	0.724245	0.007729	TCONS_00021910	NC_000082.7:84946445-84949585	amyloid beta (A4) precursor protein%2C transcript variant X2	NC_000082.7:84782223-84972187	11820	App	25742	down_stream
TCONS_00021910	XM_036159749.1	0.870066	0.000234	TCONS_00021910	NC_000082.7:84946445-84949585	amyloid beta (A4) precursor protein%2C transcript variant X3	NC_000082.7:84814691-84972187	11820	App	25742	down_stream
XR_001781962.3	NM_011782.2	0.770859	0.003336	predicted gene%2C 46558%2C transcript variant X1	NC_000082.7:85696398-85702085	a disintegrin-like and metallopeptidase (reprolysin type) with thrombospondin type 1 motif%2C 5 (aggrecanase-2)	NC_000082.7:85655044-85698013	23794	Adamts5	1615	down_stream
TCONS_00021984	NM_134123.3	0.709385	0.009774	TCONS_00021984	NC_000083.7:3251476-3290016	SR-related CTD-associated factor 8	NC_000083.7:3165246-3249134	106583	Scaf8	2342	down_stream
XR_001782194.1	XM_006523204.2	-0.751912	0.004794	predicted gene%2C 46599%2C transcript variant X1	NC_000083.7:5978580-5979626	synaptojanin 2%2C transcript variant X3	NC_000083.7:5991560-6090413	20975	Synj2	11934	up_stream
NR_037588.1	NM_001159516.1	0.742651	0.005661	colon adenocarcinoma hypermethylated RNA	NC_000083.7:10538847-10540070	quaking%2C transcript variant 2	NC_000083.7:10429107-10538290	19317	Qk	557	down_stream
NR_045290.1	NM_011948.2	0.823502	0.000995	RIKEN cDNA 4732491K20 gene	NC_000083.7:12537739-12546137	mitogen-activated protein kinase kinase kinase 4%2C transcript variant 1	NC_000083.7:12446507-12537547	26407	Map3k4	192	down_stream
NR_155514.1	NM_013671.3	-0.756643	0.004392	predicted gene%2C 36117%2C transcript variant 1	NC_000083.7:13253630-13258950	superoxide dismutase 2%2C mitochondrial	NC_000083.7:13226725-13237006	20656	Sod2	16624	down_stream
NR_015472.2	NM_023824.3	0.84146	0.000601	RIKEN cDNA 9530082P21 gene	NC_000083.7:23968209-23973039	progestin and adipoQ receptor family member IV	NC_000083.7:23955159-23959304	76498	Paqr4	8905	down_stream
NR_015472.2	XM_006524083.5	0.844493	0.000548	RIKEN cDNA 9530082P21 gene	NC_000083.7:23968209-23973039	FLYWCH-type zinc finger 1%2C transcript variant X2	NC_000083.7:23971766-23986634	224613	Flywch1	1273	up_stream
NR_015472.2	XM_006524082.5	0.719162	0.008388	RIKEN cDNA 9530082P21 gene	NC_000083.7:23968209-23973039	FLYWCH-type zinc finger 1%2C transcript variant X1	NC_000083.7:23971766-23993504	224613	Flywch1	1273	up_stream
NR_033554.1	NM_010023.4	0.724255	0.007728	RIKEN cDNA D330041H03 gene	NC_000083.7:24628454-24633487	enoyl-Coenzyme A delta isomerase 1	NC_000083.7:24645656-24658290	13177	Eci1	12169	up_stream
NR_033554.1	NM_025718.3	0.80102	0.00174	RIKEN cDNA D330041H03 gene	NC_000083.7:24628454-24633487	deoxyribonuclease 1-like 2	NC_000083.7:24659741-24662075	66705	Dnase1l2	26254	up_stream
NR_168725.1	NM_001162869.2	0.868386	0.000248	RIKEN cDNA 1700022N22 gene%2C transcript variant 3	NC_000083.7:26204803-26210004	RAB11 family interacting protein 3 (class II)%2C transcript variant 1	NC_000083.7:26208009-26288492	215445	Rab11fip3	1995	up_stream
NR_045427.1	XM_036160410.1	0.712362	0.009335	RIKEN cDNA 1810013A23 gene	NC_000083.7:28490681-28492137	peroxisome proliferator activator receptor delta%2C transcript variant X3	NC_000083.7:28451687-28520446	19015	Ppard	29765	down_stream
NR_168267.1	XM_030249712.2	0.808511	0.001456	predicted gene 20522%2C transcript variant 2	NC_000083.7:35341710-35345319	BCL2-associated athanogene 6%2C transcript variant X3	NC_000083.7:35354439-35366285	224727	Bag6	9120	up_stream
XR_003952395.2	NM_013854.1	-0.709077	0.00982	predicted gene%2C 32655%2C transcript variant X2	NC_000083.7:36280640-36283430	ATP-binding cassette%2C sub-family F (GCN20)%2C member 1	NC_000083.7:36267710-36280642	224742	Abcf1	2	down_stream
XR_004939722.1	NM_001286653.1	-0.793643	0.00206	predicted gene%2C 34857%2C transcript variant X1	NC_000083.7:44356559-44377173	regulator of calcineurin 2%2C transcript variant 3	NC_000083.7:44114893-44350407	53901	Rcan2	6152	down_stream
TCONS_00023010	XM_036160441.1	-0.825741	0.000937	TCONS_00023010	NC_000083.7:47159852-47168578	BRD4 interacting chromatin remodeling complex associated protein like%2C transcript variant X12	NC_000083.7:47109075-47168739	210982	Bicral	8887	down_stream
NR_130176.1	XM_017317745.3	0.803481	0.001642	RIKEN cDNA 4930405O22 gene	NC_000083.7:63612440-63619968	predicted gene%2C 41607	NC_000083.7:63564701-63610768	105246303	Gm41607	1672	down_stream
XR_385739.5	XM_006525151.4	0.761174	0.004032	predicted gene%2C 30140%2C transcript variant X2	NC_000083.7:72084780-72089547	CAP-GLY domain containing linker protein family%2C member 4%2C transcript variant X11	NC_000083.7:72089756-72165346	78785	Clip4	209	up_stream
XR_385738.5	XM_006525151.4	-0.702369	0.010868	predicted gene%2C 30140%2C transcript variant X1	NC_000083.7:72084780-72089599	CAP-GLY domain containing linker protein family%2C member 4%2C transcript variant X11	NC_000083.7:72089756-72165346	78785	Clip4	157	up_stream
TCONS_00022564	NM_001166493.1	0.705214	0.010414	TCONS_00022564	NC_000083.7:75742899-75760608	RAS%2C guanyl releasing protein 3%2C transcript variant 1	NC_000083.7:75742899-75836049	240168	Rasgrp3	17709	down_stream
XR_385776.3	NM_001285940.1	0.86764	0.000255	predicted gene%2C 32336	NC_000083.7:78703749-78708052	fasciculation and elongation protein zeta 2 (zygin II)%2C transcript variant 1	NC_000083.7:78685306-78725581	225020	Fez2	21832	down_stream
XR_385776.3	NM_199448.3	0.861116	0.000321	predicted gene%2C 32336	NC_000083.7:78703749-78708052	fasciculation and elongation protein zeta 2 (zygin II)%2C transcript variant 2	NC_000083.7:78685306-78725581	225020	Fez2	21832	down_stream
XR_877067.4	NM_001364946.1	0.855417	0.000388	predicted gene%2C 36826	NC_000083.7:85465483-85483594	calmodulin-lysine N-methyltransferase%2C transcript variant 2	NC_000083.7:85398053-85437918	73582	Camkmt	27565	down_stream
XR_004939619.1	NM_145491.2	0.754724	0.004552	uncharacterized LOC118567342	NC_000083.7:87271794-87292555	ras homolog family member Q	NC_000083.7:87270538-87307497	104215	Rhoq	22017	down_stream
NR_045964.1	NM_001357135.1	0.779002	0.002826	predicted gene 1976%2C transcript variant 2	NC_000083.7:95067369-95142227	methyltransferase like 4%2C transcript variant 1	NC_000083.7:95030017-95057447	76781	Mettl4	9922	down_stream
TCONS_00023662	NM_010258.3	0.912835	3.4e-05	TCONS_00023662	NC_000084.7:11043737-11052381	GATA binding protein 6	NC_000084.7:11052509-11085635	14465	Gata6	128	up_stream
NR_105022.1	NM_010258.3	0.907068	4.7e-05	GATA binding protein 6%2C opposite strand%2C transcript variant 1	NC_000084.7:11049928-11052567	GATA binding protein 6	NC_000084.7:11052509-11085635	14465	Gata6	58	up_stream
XR_001782431.3	NM_026006.1	0.706753	0.010174	predicted gene%2C 46619	NC_000084.7:32070273-32072166	SFT2 domain containing 3	NC_000084.7:32042146-32044956	67158	Sft2d3	25317	down_stream
XR_001782452.1	TCONS_00023547	0.750808	0.004892	predicted gene%2C 46626	NC_000084.7:67894780-67901729	TCONS_00023547	NC_000084.7:67907593-67928557	72124	Seh1l	5864	up_stream
XR_001782471.1	XM_036161307.1	0.8197	0.001099	uncharacterized LOC108167377	NC_000084.7:77017920-77026549	haloacid dehalogenase-like hydrolase domain containing 2%2C transcript variant X1	NC_000084.7:77031774-77059330	76987	Hdhd2	5225	up_stream
XR_001782471.1	NM_001039202.1	0.703543	0.010679	uncharacterized LOC108167377	NC_000084.7:77017920-77026549	haloacid dehalogenase-like hydrolase domain containing 2%2C transcript variant 3	NC_000084.7:77031810-77049749	76987	Hdhd2	5261	up_stream
XR_386385.4	TCONS_00023921	0.84016	0.000624	predicted gene%2C 29913	NC_000084.7:80359888-80365693	TCONS_00023921	NC_000084.7:80347600-80377922	240444	Kcng2	18034	down_stream
TCONS_00024484	NM_029456.2	0.716661	0.008728	TCONS_00024484	NC_000085.7:3607055-3625557	protein phosphatase 6%2C regulatory subunit 3%2C transcript variant 2	NC_000085.7:3504927-3625749	52036	Ppp6r3	18694	down_stream
TCONS_00024484	TCONS_00024480	0.774369	0.003108	TCONS_00024484	NC_000085.7:3607055-3625557	TCONS_00024480	NC_000085.7:3504944-3625747	52036	Ppp6r3	18692	down_stream
XR_388288.2	XM_036161376.1	0.835351	0.000718	predicted gene%2C 30082%2C transcript variant X1	NC_000085.7:4251706-4253239	carnosine synthase 1%2C transcript variant X1	NC_000085.7:4214322-4227390	107239	Carns1	24316	down_stream
TCONS_00024028	TCONS_00024025	0.900476	6.5e-05	TCONS_00024028	NC_000085.7:5845805-5895550	TCONS_00024025	NC_000085.7:5791225-5821437	16998	Ltbp3	24368	down_stream
TCONS_00024028	NM_023912.3	0.785967	0.002438	TCONS_00024028	NC_000085.7:5845805-5895550	SCY1-like 1 (S. cerevisiae)%2C transcript variant 1	NC_000085.7:5808454-5821447	78891	Scyl1	24358	down_stream
XR_003952934.1	NM_175013.2	0.721617	0.008065	predicted gene%2C 52405	NC_000085.7:24832377-24836210	phosphoglucomutase 5	NC_000085.7:24655624-24839206	226041	Pgm5	6829	down_stream
XR_877793.2	XM_036161518.1	0.783129	0.002591	predicted gene%2C 35438%2C transcript variant X5	NC_000085.7:27079350-27172526	very low density lipoprotein receptor%2C transcript variant X9	NC_000085.7:27194814-27231627	22359	Vldlr	22288	up_stream
XR_386629.3	NM_183179.1	0.851267	0.000444	predicted gene%2C 35268	NC_000085.7:27290274-27299129	potassium channel%2C subfamily V%2C member 2	NC_000085.7:27300018-27314579	240595	Kcnv2	889	up_stream
TCONS_00024277	NM_021299.2	0.766256	0.003654	TCONS_00024277	NC_000085.7:29044723-29053692	adenylate kinase 3%2C transcript variant 1	NC_000085.7:28998231-29025361	56248	Ak3	19362	down_stream
XR_386702.5	TCONS_00024785	0.796636	0.001925	RIKEN cDNA A930028N01 gene	NC_000085.7:40285078-40288173	TCONS_00024785	NC_000085.7:40280483-40390754	20411	Sorbs1	7690	down_stream
XR_386702.5	TCONS_00024789	0.802348	0.001687	RIKEN cDNA A930028N01 gene	NC_000085.7:40285078-40288173	TCONS_00024789	NC_000085.7:40280483-40439842	20411	Sorbs1	7690	down_stream
XR_386702.5	TCONS_00024798	0.794875	0.002004	RIKEN cDNA A930028N01 gene	NC_000085.7:40285078-40288173	TCONS_00024798	NC_000085.7:40280483-40502180	20411	Sorbs1	7690	down_stream
XR_386702.5	TCONS_00024805	-0.840906	0.000611	RIKEN cDNA A930028N01 gene	NC_000085.7:40285078-40288173	TCONS_00024805	NC_000085.7:40280483-40502262	20411	Sorbs1	7690	down_stream
NR_152247.1	NM_019408.3	0.747817	0.005164	RIKEN cDNA 4833438C02 gene%2C transcript variant 1	NC_000085.7:46292023-46294068	nuclear factor of kappa light polypeptide gene enhancer in B cells 2%2C p49/p100%2C transcript variant 1	NC_000085.7:46294133-46300529	18034	Nfkb2	65	up_stream
XR_877980.1	XM_006527468.5	0.716398	0.008764	predicted gene%2C 41884	NC_000085.7:60535867-60539550	CDK2 associated%2C cullin domain 1%2C transcript variant X1	NC_000085.7:60513143-60568724	78832	Cacul1	26407	down_stream
NR_038158.1	XM_011247456.3	0.771492	0.003294	RIKEN cDNA 5730405O15 gene	NC_000086.8:12908253-12911534	ubiquitin specific peptidase 9%2C X chromosome%2C transcript variant X12	NC_000086.8:12937682-13039567	22284	Usp9x	26148	up_stream
NR_038158.1	TCONS_00024982	0.758802	0.004218	RIKEN cDNA 5730405O15 gene	NC_000086.8:12908253-12911534	TCONS_00024982	NC_000086.8:12937743-13050756	22284	Usp9x	26209	up_stream
NR_027445.1	XM_006527602.4	-0.798752	0.001834	RIKEN cDNA A230072C01 gene%2C transcript variant 2	NC_000086.8:20827914-20853588	ubiquitously expressed prefoldin like chaperone%2C transcript variant X1	NC_000086.8:20818161-20828256	22294	Uxt	342	down_stream
XR_003953097.1	NM_001290485.2	0.769624	0.00342	uncharacterized LOC115489130	NC_000086.8:37531549-37545119	lysosomal-associated membrane protein 2%2C transcript variant 3	NC_000086.8:37488523-37545337	16784	Lamp2	13788	down_stream
XR_003953097.1	NM_010685.4	0.863702	0.000293	uncharacterized LOC115489130	NC_000086.8:37531549-37545119	lysosomal-associated membrane protein 2%2C transcript variant 2	NC_000086.8:37508378-37545337	16784	Lamp2	13788	down_stream
NR_168266.1	NM_001081473.1	0.753677	0.004641	predicted gene%2C 39526	NC_000086.8:93777757-93790519	zinc finger%2C X-linked%2C duplicated B	NC_000086.8:93768174-93773797	668166	Zxdb	3960	down_stream
XR_386995.2	NM_010833.2	0.943807	4e-06	predicted gene%2C 30427	NC_000086.8:95148804-95152720	moesin	NC_000086.8:95139650-95212159	17698	Msn	13070	down_stream
TCONS_00025150	NM_177789.5	0.859184	0.000343	TCONS_00025150	NC_000086.8:95283548-95286470	V-set and immunoglobulin domain containing 4	NC_000086.8:95290806-95337044	278180	Vsig4	4336	up_stream
XR_878297.4	NM_026887.3	-0.767281	0.003582	predicted gene%2C 38561	NC_000086.8:162740988-162769103	adaptor-related protein complex 1%2C sigma 2 subunit%2C transcript variant 1	NC_000086.8:162692012-162712542	108012	Ap1s2	28446	down_stream
