# Supplementary material for: Novel Transcriptomic Interactomes of Noncoding RNAs in the Heart under Altered Thyroid Hormonal States
Source: Int J Mol Sci. 2023 Mar 31;24(7):6560. doi: 10.3390/ijms24076560 (PMC10095585; doi:10.3390/ijms24076560)
Supplement: Supplementary file 1 [file ijms-24-06560-s001.zip › Supplemental File S16 lncRNA-mRNA.co-expression.trans_interaction.xlsx]

## Sheet: lncRNA-mRNA.co-expression.trans
lncRNA_id	mRNA_id	corelation	p_value	lncRNA_name	lncRNA_loci	mRNA_name	mRNA_loci	mRNA_gene_id	mRNA_gene_name	TF_go_id	TF_go_name
XR_004935520.1	TCONS_00000136	0.706451	0.010221	uncharacterized LOC118567656	NC_000067.7:4917068-4918632	TCONS_00000136	NC_000067.7:52155808-52201024	20846	Stat1	GO:0003700	DNA binding transcription factor activity
XR_004935520.1	NM_001159731.1	0.734605	0.006506	uncharacterized LOC118567656	NC_000067.7:4917068-4918632	retinoid X receptor gamma%2C transcript variant 2	NC_000067.7:167445833-167467192	20183	Rxrg	GO:0003700	DNA binding transcription factor activity
XR_004935520.1	XM_006497165.5	0.852352	0.000429	uncharacterized LOC118567656	NC_000067.7:4917068-4918632	estrogen-related receptor gamma%2C transcript variant X10	NC_000067.7:187340706-187947081	26381	Esrrg	GO:0003700	DNA binding transcription factor activity
XR_004935520.1	NM_007498.3	0.894739	8.5e-05	uncharacterized LOC118567656	NC_000067.7:4917068-4918632	activating transcription factor 3	NC_000067.7:190902492-190915530	11910	Atf3	GO:0003700	DNA binding transcription factor activity
XR_004935520.1	NM_178778.3	0.765305	0.003723	uncharacterized LOC118567656	NC_000067.7:4917068-4918632	suppressor of cancer cell invasion	NC_000068.8:38956225-39080742	320271	Scai	GO:0000988	transcription factor activity, protein binding
XR_004935520.1	XM_036157713.1	0.713424	0.009182	uncharacterized LOC118567656	NC_000067.7:4917068-4918632	activating transcription factor 2%2C transcript variant X23	NC_000068.8:73660896-73722972	11909	Atf2	GO:0003700	DNA binding transcription factor activity
XR_004935520.1	XM_006502031.4	0.839439	0.000638	uncharacterized LOC118567656	NC_000067.7:4917068-4918632	E74-like factor 2%2C transcript variant X4	NC_000069.7:51162705-51247925	69257	Elf2	GO:0003700	DNA binding transcription factor activity
XR_004935520.1	NM_012051.4	0.816405	0.001196	uncharacterized LOC118567656	NC_000067.7:4917068-4918632	ets variant 3%2C transcript variant 3	NC_000069.7:87432884-87447465	27049	Etv3	GO:0003700	DNA binding transcription factor activity
XR_004935520.1	NM_013497.4	0.776552	0.002973	uncharacterized LOC118567656	NC_000067.7:4917068-4918632	cAMP responsive element binding protein 3	NC_000070.7:43562657-43567061	12913	Creb3	GO:0003700	DNA binding transcription factor activity
XR_004935520.1	NM_001307989.2	0.704134	0.010585	uncharacterized LOC118567656	NC_000067.7:4917068-4918632	nuclear receptor subfamily 4%2C group A%2C member 3%2C transcript variant 2	NC_000070.7:48045304-48057839	18124	Nr4a3	GO:0003700	DNA binding transcription factor activity
XR_004935520.1	NM_008687.6	0.715684	0.008863	uncharacterized LOC118567656	NC_000067.7:4917068-4918632	nuclear factor I/B%2C transcript variant 3	NC_000070.7:82208409-82424016	18028	Nfib	GO:0003700	DNA binding transcription factor activity
XR_004935520.1	NM_001290696.1	0.787069	0.002381	uncharacterized LOC118567656	NC_000067.7:4917068-4918632	forkhead box J3%2C transcript variant 2	NC_000070.7:119396857-119486316	230700	Foxj3	GO:0003700	DNA binding transcription factor activity
XR_004935520.1	XM_006504628.4	0.75169	0.004814	uncharacterized LOC118567656	NC_000067.7:4917068-4918632	zinc finger with KRAB and SCAN domains 1%2C transcript variant X1	NC_000071.7:138083311-138106084	74570	Zkscan1	GO:0003700	DNA binding transcription factor activity
XR_004935520.1	XM_036166039.1	0.742059	0.00572	uncharacterized LOC118567656	NC_000067.7:4917068-4918632	cAMP responsive element binding protein 5%2C transcript variant X1	NC_000072.7:53264153-53673025	231991	Creb5	GO:0003700	DNA binding transcription factor activity
XR_004935520.1	XM_006505906.5	0.750665	0.004905	uncharacterized LOC118567656	NC_000067.7:4917068-4918632	nuclear receptor subfamily 2%2C group C%2C member 2%2C transcript variant X4	NC_000072.7:92068483-92148962	22026	Nr2c2	GO:0003700	DNA binding transcription factor activity
XR_004935520.1	XM_006505320.4	0.860045	0.000333	uncharacterized LOC118567656	NC_000067.7:4917068-4918632	forkhead box P1%2C transcript variant X29	NC_000072.7:98902302-99030079	108655	Foxp1	GO:0003700	DNA binding transcription factor activity
XR_004935520.1	XM_036153751.1	0.823841	0.000986	uncharacterized LOC118567656	NC_000067.7:4917068-4918632	nuclear receptor subfamily 2%2C group F%2C member 6%2C transcript variant X3	NC_000074.7:71826761-71834662	13864	Nr2f6	GO:0003700	DNA binding transcription factor activity
XR_004935520.1	NM_001033161.2	0.723636	0.007806	uncharacterized LOC118567656	NC_000067.7:4917068-4918632	TNFRSF1A-associated via death domain	NC_000074.7:105985206-105991226	71609	Tradd	GO:0003700	DNA binding transcription factor activity
XR_004935520.1	TCONS_00011736	0.793622	0.002061	uncharacterized LOC118567656	NC_000067.7:4917068-4918632	TCONS_00011736	NC_000074.7:108020101-108106142	54446	Nfat5	GO:0003700	DNA binding transcription factor activity
XR_004935520.1	NM_013519.2	0.754706	0.004554	uncharacterized LOC118567656	NC_000067.7:4917068-4918632	forkhead box C2	NC_000074.7:121842909-121845634	14234	Foxc2	GO:0003700	DNA binding transcription factor activity
XR_004935520.1	NM_194263.2	0.830303	0.000827	uncharacterized LOC118567656	NC_000067.7:4917068-4918632	T-box 20%2C transcript variant 1	NC_000075.7:24632107-24685599	57246	Tbx20	GO:0003700	DNA binding transcription factor activity
XR_004935520.1	NM_020496.3	0.89882	7e-05	uncharacterized LOC118567656	NC_000067.7:4917068-4918632	T-box 20%2C transcript variant 2	NC_000075.7:24651543-24685599	57246	Tbx20	GO:0003700	DNA binding transcription factor activity
XR_004935520.1	XM_006512119.4	0.760704	0.004068	uncharacterized LOC118567656	NC_000067.7:4917068-4918632	zinc finger protein 445%2C transcript variant X2	NC_000075.7:122677987-122715910	235682	Zfp445	GO:0003700	DNA binding transcription factor activity
XR_004935520.1	XM_036154922.1	0.727324	0.007349	uncharacterized LOC118567656	NC_000067.7:4917068-4918632	zinc finger protein 445%2C transcript variant X8	NC_000075.7:122677987-122715910	235682	Zfp445	GO:0003700	DNA binding transcription factor activity
XR_004935520.1	NM_172941.4	0.843625	0.000563	uncharacterized LOC118567656	NC_000067.7:4917068-4918632	zinc finger with KRAB and SCAN domains 17%2C transcript variant 1	NC_000077.7:59376345-59397466	268417	Zkscan17	GO:0003700	DNA binding transcription factor activity
XR_004935520.1	NM_001313983.1	0.718236	0.008513	uncharacterized LOC118567656	NC_000067.7:4917068-4918632	thyroid hormone receptor alpha%2C transcript variant 1	NC_000077.7:98632610-98659832	21833	Thra	GO:0003700	DNA binding transcription factor activity
XR_004935520.1	TCONS_00015936	0.768866	0.003471	uncharacterized LOC118567656	NC_000067.7:4917068-4918632	TCONS_00015936	NC_000077.7:98632710-98659832	21833	Thra	GO:0003700	DNA binding transcription factor activity
XR_004935520.1	NM_007840.3	0.797284	0.001897	uncharacterized LOC118567656	NC_000067.7:4917068-4918632	DEAD box helicase 5	NC_000077.7:106671181-106679320	13207	Ddx5	GO:0000988	transcription factor activity, protein binding
XR_004935520.1	NM_029315.1	0.792283	0.002123	uncharacterized LOC118567656	NC_000067.7:4917068-4918632	POU domain class 5%2C transcription factor 2	NC_000079.7:78173020-78174415	75507	Pou5f2	GO:0003700	DNA binding transcription factor activity
XR_004935520.1	TCONS_00019973	0.860547	0.000327	uncharacterized LOC118567656	NC_000067.7:4917068-4918632	TCONS_00019973	NC_000080.7:63436369-63506854	14463	Gata4	GO:0003700	DNA binding transcription factor activity
XR_004935520.1	XM_017316729.3	0.802939	0.001664	uncharacterized LOC118567656	NC_000067.7:4917068-4918632	metadherin%2C transcript variant X4	NC_000081.7:34082612-34143683	67154	Mtdh	GO:0003700	DNA binding transcription factor activity
XR_004935520.1	TCONS_00020420	0.845561	0.000531	uncharacterized LOC118567656	NC_000067.7:4917068-4918632	TCONS_00020420	NC_000081.7:81686912-81711064	21685	Tef	GO:0003700	DNA binding transcription factor activity
XR_004935520.1	NM_001113418.1	0.850047	0.000462	uncharacterized LOC118567656	NC_000067.7:4917068-4918632	peroxisome proliferator activated receptor alpha%2C transcript variant 2	NC_000081.7:85619764-85691052	19013	Ppara	GO:0003700	DNA binding transcription factor activity
XR_004935520.1	XM_006520352.5	0.803753	0.001632	uncharacterized LOC118567656	NC_000067.7:4917068-4918632	activating transcription factor 1%2C transcript variant X2	NC_000081.7:100126749-100159129	11908	Atf1	GO:0003700	DNA binding transcription factor activity
XR_004935520.1	NM_148924.3	0.833304	0.000761	uncharacterized LOC118567656	NC_000067.7:4917068-4918632	zinc finger protein 263	NC_000082.7:3561962-3568652	74120	Zfp263	GO:0003700	DNA binding transcription factor activity
XR_004935520.1	NM_023794.2	0.711302	0.009489	uncharacterized LOC118567656	NC_000067.7:4917068-4918632	ets variant 5%2C transcript variant 2	NC_000082.7:22200062-22258320	104156	Etv5	GO:0003700	DNA binding transcription factor activity
XR_004935520.1	NM_017463.3	0.770398	0.003367	uncharacterized LOC118567656	NC_000067.7:4917068-4918632	pre B cell leukemia homeobox 2	NC_000083.7:34811232-34816374	18515	Pbx2	GO:0003700	DNA binding transcription factor activity
XR_004935520.1	NM_001110832.1	0.708549	0.0099	uncharacterized LOC118567656	NC_000067.7:4917068-4918632	nuclear transcription factor-Y alpha%2C transcript variant 1	NC_000083.7:48693912-48716848	18044	Nfya	GO:0003700	DNA binding transcription factor activity
XR_004935520.1	NM_001164109.1	0.70157	0.010998	uncharacterized LOC118567656	NC_000067.7:4917068-4918632	nuclear factor of activated T cells%2C cytoplasmic%2C calcineurin dependent 1%2C transcript variant 3	NC_000084.7:80690649-80756286	18018	Nfatc1	GO:0003700	DNA binding transcription factor activity
XR_004935520.1	XM_017318209.3	0.712675	0.00929	uncharacterized LOC118567656	NC_000067.7:4917068-4918632	estrogen related receptor%2C alpha%2C transcript variant X3	NC_000085.7:6888344-6899182	26379	Esrra	GO:0003700	DNA binding transcription factor activity
XR_004935520.1	NM_019408.3	0.754992	0.00453	uncharacterized LOC118567656	NC_000067.7:4917068-4918632	nuclear factor of kappa light polypeptide gene enhancer in B cells 2%2C p49/p100%2C transcript variant 1	NC_000085.7:46294133-46300529	18034	Nfkb2	GO:0003700	DNA binding transcription factor activity
NR_015470.1	XM_030252467.2	0.792779	0.0021	RIKEN cDNA 2610203C22 gene	NC_000067.7:9631056-9701317	signal transducer and activator of transcription 1%2C transcript variant X2	NC_000067.7:52158635-52200082	20846	Stat1	GO:0003700	DNA binding transcription factor activity
NR_015470.1	NM_009107.3	-0.707775	0.010017	RIKEN cDNA 2610203C22 gene	NC_000067.7:9631056-9701317	retinoid X receptor gamma%2C transcript variant 1	NC_000067.7:167425930-167467192	20183	Rxrg	GO:0003700	DNA binding transcription factor activity
NR_015470.1	XM_011238796.4	0.779053	0.002823	RIKEN cDNA 2610203C22 gene	NC_000067.7:9631056-9701317	activating transcription factor 6%2C transcript variant X2	NC_000067.7:170532244-170696154	226641	Atf6	GO:0003700	DNA binding transcription factor activity
NR_015470.1	NM_001359750.1	-0.738894	0.006045	RIKEN cDNA 2610203C22 gene	NC_000067.7:9631056-9701317	ets variant 3%2C transcript variant 4	NC_000069.7:87432884-87447465	27049	Etv3	GO:0003700	DNA binding transcription factor activity
NR_015470.1	NM_008689.2	0.73809	0.006129	RIKEN cDNA 2610203C22 gene	NC_000067.7:9631056-9701317	nuclear factor of kappa light polypeptide gene enhancer in B cells 1%2C p105	NC_000069.7:135290415-135397308	18033	Nfkb1	GO:0003700	DNA binding transcription factor activity
NR_015470.1	XM_036164921.1	0.725182	0.007612	RIKEN cDNA 2610203C22 gene	NC_000067.7:9631056-9701317	recombination signal binding protein for immunoglobulin kappa J region%2C transcript variant X4	NC_000071.7:53759203-53814703	19664	Rbpj	GO:0003700	DNA binding transcription factor activity
NR_015470.1	NM_133906.4	0.802995	0.001661	RIKEN cDNA 2610203C22 gene	NC_000067.7:9631056-9701317	zinc finger with KRAB and SCAN domains 1%2C transcript variant 1	NC_000071.7:138083345-138106084	74570	Zkscan1	GO:0003700	DNA binding transcription factor activity
NR_015470.1	XM_030255069.2	-0.743881	0.00554	RIKEN cDNA 2610203C22 gene	NC_000067.7:9631056-9701317	forkhead box P1%2C transcript variant X32	NC_000072.7:98902302-99074080	108655	Foxp1	GO:0003700	DNA binding transcription factor activity
NR_015470.1	NM_001252601.1	0.705407	0.010384	RIKEN cDNA 2610203C22 gene	NC_000067.7:9631056-9701317	interferon regulatory factor 7%2C transcript variant 3	NC_000073.7:140843095-140846337	54123	Irf7	GO:0003700	DNA binding transcription factor activity
NR_015470.1	NM_008539.4	0.710041	0.009676	RIKEN cDNA 2610203C22 gene	NC_000067.7:9631056-9701317	SMAD family member 1	NC_000074.7:80065023-80126057	17125	Smad1	GO:0003700	DNA binding transcription factor activity
NR_015470.1	NM_023814.4	0.72853	0.007204	RIKEN cDNA 2610203C22 gene	NC_000067.7:9631056-9701317	T-box18	NC_000075.7:87584852-87613313	76365	Tbx18	GO:0003700	DNA binding transcription factor activity
NR_015470.1	XM_006510978.4	0.702889	0.010784	RIKEN cDNA 2610203C22 gene	NC_000067.7:9631056-9701317	transcription factor Dp 2%2C transcript variant X22	NC_000075.7:96078524-96205699	211586	Tfdp2	GO:0003700	DNA binding transcription factor activity
NR_015470.1	XM_006512565.5	0.704149	0.010582	RIKEN cDNA 2610203C22 gene	NC_000067.7:9631056-9701317	heat shock factor 2%2C transcript variant X2	NC_000076.7:57362703-57388966	15500	Hsf2	GO:0003700	DNA binding transcription factor activity
NR_015470.1	NM_001362682.1	0.712026	0.009384	RIKEN cDNA 2610203C22 gene	NC_000067.7:9631056-9701317	signal transducer and activator of transcription 5B%2C transcript variant 3	NC_000077.7:100671556-100704196	20851	Stat5b	GO:0003700	DNA binding transcription factor activity
NR_015470.1	XM_011248846.4	0.799038	0.001822	RIKEN cDNA 2610203C22 gene	NC_000067.7:9631056-9701317	signal transducer and activator of transcription 3%2C transcript variant X1	NC_000077.7:100777635-100830447	20848	Stat3	GO:0003700	DNA binding transcription factor activity
NR_015470.1	XM_030247246.2	0.774629	0.003092	RIKEN cDNA 2610203C22 gene	NC_000067.7:9631056-9701317	zinc finger and SCAN domain containing 12%2C transcript variant X1	NC_000079.7:21546981-21556458	22758	Zscan12	GO:0003700	DNA binding transcription factor activity
NR_015470.1	NM_016684.2	-0.753317	0.004672	RIKEN cDNA 2610203C22 gene	NC_000067.7:9631056-9701317	zinc finger and SCAN domain containing 12	NC_000079.7:21546989-21556472	22758	Zscan12	GO:0003700	DNA binding transcription factor activity
NR_015470.1	NM_011243.2	0.757759	0.004301	RIKEN cDNA 2610203C22 gene	NC_000067.7:9631056-9701317	retinoic acid receptor%2C beta%2C transcript variant beta2	NC_000080.7:5894286-6038924	218772	Rarb	GO:0003700	DNA binding transcription factor activity
NR_015470.1	XM_011245387.4	0.767302	0.00358	RIKEN cDNA 2610203C22 gene	NC_000067.7:9631056-9701317	predicted gene%2C 41291	NC_000081.7:34081887-34083373	105245911	Gm41291	GO:0003700	DNA binding transcription factor activity
NR_015470.1	NM_001331152.1	-0.713729	0.009138	RIKEN cDNA 2610203C22 gene	NC_000067.7:9631056-9701317	heat shock factor 1%2C transcript variant 1	NC_000081.7:76361561-76385355	15499	Hsf1	GO:0003700	DNA binding transcription factor activity
NR_015470.1	NM_001331214.1	0.756996	0.004363	RIKEN cDNA 2610203C22 gene	NC_000067.7:9631056-9701317	heat shock factor 1%2C transcript variant 5	NC_000081.7:76361561-76385355	15499	Hsf1	GO:0003700	DNA binding transcription factor activity
NR_015470.1	NM_008296.3	-0.749695	0.004992	RIKEN cDNA 2610203C22 gene	NC_000067.7:9631056-9701317	heat shock factor 1%2C transcript variant 4	NC_000081.7:76361561-76385355	15499	Hsf1	GO:0003700	DNA binding transcription factor activity
NR_015470.1	NM_011244.4	0.723803	0.007785	RIKEN cDNA 2610203C22 gene	NC_000067.7:9631056-9701317	retinoic acid receptor%2C gamma%2C transcript variant 1	NC_000081.7:102143372-102165957	19411	Rarg	GO:0003700	DNA binding transcription factor activity
NR_015470.1	TCONS_00022266	0.705541	0.010363	RIKEN cDNA 2610203C22 gene	NC_000067.7:9631056-9701317	TCONS_00022266	NC_000083.7:34247248-34257377	20182	Rxrb	GO:0003700	DNA binding transcription factor activity
NR_015470.1	XM_006525701.4	0.777052	0.002942	RIKEN cDNA 2610203C22 gene	NC_000067.7:9631056-9701317	SMAD family member 4%2C transcript variant X2	NC_000084.7:73769250-73836640	17128	Smad4	GO:0003700	DNA binding transcription factor activity
NR_015470.1	XM_030250732.2	0.705622	0.01035	RIKEN cDNA 2610203C22 gene	NC_000067.7:9631056-9701317	conserved helix-loop-helix ubiquitous kinase%2C transcript variant X1	NC_000085.7:44064204-44095938	12675	Chuk	GO:0003700	DNA binding transcription factor activity
NR_015470.1	XM_036162179.1	0.704166	0.010579	RIKEN cDNA 2610203C22 gene	NC_000067.7:9631056-9701317	activating transcription factor 1%2C pseudogene	NC_000086.8:52885449-52886480	100040260	Atf1-ps	GO:0003700	DNA binding transcription factor activity
NR_015470.1	XM_006528499.5	0.72408	0.00775	RIKEN cDNA 2610203C22 gene	NC_000067.7:9631056-9701317	TSC22 domain family%2C member 3%2C transcript variant X3	NC_000086.8:139440276-139500217	14605	Tsc22d3	GO:0003700	DNA binding transcription factor activity
NR_040462.1	XM_036157713.1	0.723295	0.007849	RIKEN cDNA 1700034P13 gene	NC_000067.7:9817872-9841481	activating transcription factor 2%2C transcript variant X23	NC_000068.8:73660896-73722972	11909	Atf2	GO:0003700	DNA binding transcription factor activity
NR_040462.1	XM_011239589.4	0.747689	0.005176	RIKEN cDNA 1700034P13 gene	NC_000067.7:9817872-9841481	MAX gene associated%2C transcript variant X8	NC_000068.8:119716771-119800610	29808	Mga	GO:0003700	DNA binding transcription factor activity
NR_040462.1	XM_006505322.1	0.719826	0.0083	RIKEN cDNA 1700034P13 gene	NC_000067.7:9817872-9841481	forkhead box P1%2C transcript variant X34	NC_000072.7:98902302-99005875	108655	Foxp1	GO:0003700	DNA binding transcription factor activity
NR_040462.1	NM_177687.3	0.748678	0.005085	RIKEN cDNA 1700034P13 gene	NC_000067.7:9817872-9841481	cAMP responsive element binding protein-like 2	NC_000072.7:134807161-134834846	232430	Crebl2	GO:0003700	DNA binding transcription factor activity
NR_040462.1	XM_011250460.4	0.722425	0.00796	RIKEN cDNA 1700034P13 gene	NC_000067.7:9817872-9841481	avian reticuloendotheliosis viral (v-rel) oncogene related B%2C transcript variant X4	NC_000073.7:19340141-19360634	19698	Relb	GO:0003700	DNA binding transcription factor activity
NR_040462.1	NM_001033161.2	0.780388	0.002745	RIKEN cDNA 1700034P13 gene	NC_000067.7:9817872-9841481	TNFRSF1A-associated via death domain	NC_000074.7:105985206-105991226	71609	Tradd	GO:0003700	DNA binding transcription factor activity
NR_040462.1	TCONS_00011736	0.755125	0.004518	RIKEN cDNA 1700034P13 gene	NC_000067.7:9817872-9841481	TCONS_00011736	NC_000074.7:108020101-108106142	54446	Nfat5	GO:0003700	DNA binding transcription factor activity
NR_040462.1	NM_013519.2	0.775491	0.003038	RIKEN cDNA 1700034P13 gene	NC_000067.7:9817872-9841481	forkhead box C2	NC_000074.7:121842909-121845634	14234	Foxc2	GO:0003700	DNA binding transcription factor activity
NR_040462.1	XM_006512119.4	0.823089	0.001006	RIKEN cDNA 1700034P13 gene	NC_000067.7:9817872-9841481	zinc finger protein 445%2C transcript variant X2	NC_000075.7:122677987-122715910	235682	Zfp445	GO:0003700	DNA binding transcription factor activity
NR_040462.1	XM_036154922.1	0.827621	0.000891	RIKEN cDNA 1700034P13 gene	NC_000067.7:9817872-9841481	zinc finger protein 445%2C transcript variant X8	NC_000075.7:122677987-122715910	235682	Zfp445	GO:0003700	DNA binding transcription factor activity
NR_040462.1	XM_036157614.1	0.719513	0.008341	RIKEN cDNA 1700034P13 gene	NC_000067.7:9817872-9841481	forkhead box N3%2C transcript variant X6	NC_000078.7:99156339-99358328	71375	Foxn3	GO:0003700	DNA binding transcription factor activity
NR_040462.1	NM_001359994.1	0.724475	0.0077	RIKEN cDNA 1700034P13 gene	NC_000067.7:9817872-9841481	E2F transcription factor 3%2C transcript variant 3	NC_000079.7:30090557-30168374	13557	E2f3	GO:0003700	DNA binding transcription factor activity
NR_040462.1	NM_023699.3	0.768223	0.003516	RIKEN cDNA 1700034P13 gene	NC_000067.7:9817872-9841481	nuclear factor of activated T cells%2C cytoplasmic%2C calcineurin dependent 4%2C transcript variant 1	NC_000080.7:56062251-56071400	73181	Nfatc4	GO:0003700	DNA binding transcription factor activity
NR_040462.1	NM_001357448.1	0.737383	0.006204	RIKEN cDNA 1700034P13 gene	NC_000067.7:9817872-9841481	zinc finger protein 24%2C transcript variant 3	NC_000084.7:24142773-24153427	59057	Zfp24	GO:0003700	DNA binding transcription factor activity
NR_040462.1	XM_006525660.4	-0.703877	0.010625	RIKEN cDNA 1700034P13 gene	NC_000067.7:9817872-9841481	nuclear receptor subfamily 3%2C group C%2C member 1%2C transcript variant X3	NC_000084.7:39545027-39622485	14815	Nr3c1	GO:0003700	DNA binding transcription factor activity
NR_040462.1	XM_006525699.4	0.850313	0.000458	RIKEN cDNA 1700034P13 gene	NC_000067.7:9817872-9841481	SMAD family member 2%2C transcript variant X1	NC_000084.7:76375182-76444819	17126	Smad2	GO:0003700	DNA binding transcription factor activity
NR_040462.1	NM_001164109.1	0.751779	0.004806	RIKEN cDNA 1700034P13 gene	NC_000067.7:9817872-9841481	nuclear factor of activated T cells%2C cytoplasmic%2C calcineurin dependent 1%2C transcript variant 3	NC_000084.7:80690649-80756286	18018	Nfatc1	GO:0003700	DNA binding transcription factor activity
NR_040462.1	TCONS_00025637	0.735707	0.006385	RIKEN cDNA 1700034P13 gene	NC_000067.7:9817872-9841481	TCONS_00025637	NC_000086.8:139474353-139499523	14605	Tsc22d3	GO:0003700	DNA binding transcription factor activity
NR_024067.2	XM_030252077.2	-0.708266	0.009942	small nucleolar RNA host gene 6	NC_000067.7:10012249-10014343	nuclear receptor coactivator 2%2C transcript variant X11	NC_000067.7:13212641-13364673	17978	Ncoa2	GO:0000988	transcription factor activity, protein binding
NR_024067.2	NM_009107.3	0.752475	0.004745	small nucleolar RNA host gene 6	NC_000067.7:10012249-10014343	retinoid X receptor gamma%2C transcript variant 1	NC_000067.7:167425930-167467192	20183	Rxrg	GO:0003700	DNA binding transcription factor activity
NR_024067.2	NM_001159731.1	-0.84037	0.00062	small nucleolar RNA host gene 6	NC_000067.7:10012249-10014343	retinoid X receptor gamma%2C transcript variant 2	NC_000067.7:167445833-167467192	20183	Rxrg	GO:0003700	DNA binding transcription factor activity
NR_024067.2	TCONS_00001431	-0.742074	0.005719	small nucleolar RNA host gene 6	NC_000067.7:10012249-10014343	TCONS_00001431	NC_000067.7:167947715-168259738	18514	Pbx1	GO:0003700	DNA binding transcription factor activity
NR_024067.2	XM_030253420.2	-0.759116	0.004193	small nucleolar RNA host gene 6	NC_000067.7:10012249-10014343	activating transcription factor 6%2C transcript variant X1	NC_000067.7:170532244-170696414	226641	Atf6	GO:0003700	DNA binding transcription factor activity
NR_024067.2	XM_030246873.1	0.762433	0.003936	small nucleolar RNA host gene 6	NC_000067.7:10012249-10014343	activating transcription factor 2%2C transcript variant X22	NC_000068.8:73646861-73722908	11909	Atf2	GO:0003700	DNA binding transcription factor activity
NR_024067.2	XM_036157713.1	-0.738163	0.006121	small nucleolar RNA host gene 6	NC_000067.7:10012249-10014343	activating transcription factor 2%2C transcript variant X23	NC_000068.8:73660896-73722972	11909	Atf2	GO:0003700	DNA binding transcription factor activity
NR_024067.2	XM_006499689.3	-0.79691	0.001913	small nucleolar RNA host gene 6	NC_000067.7:10012249-10014343	MAX gene associated%2C transcript variant X3	NC_000068.8:119702993-119800610	29808	Mga	GO:0003700	DNA binding transcription factor activity
NR_024067.2	NM_020255.3	0.968063	0	small nucleolar RNA host gene 6	NC_000067.7:10012249-10014343	SCAN domain-containing 1	NC_000068.8:156153765-156154624	19018	Scand1	GO:0003700	DNA binding transcription factor activity
NR_024067.2	NM_007892.2	-0.936735	7e-06	small nucleolar RNA host gene 6	NC_000067.7:10012249-10014343	E2F transcription factor 5	NC_000069.7:14643730-14671369	13559	E2f5	GO:0003700	DNA binding transcription factor activity
NR_024067.2	TCONS_00003816	-0.796326	0.001939	small nucleolar RNA host gene 6	NC_000067.7:10012249-10014343	TCONS_00003816	NC_000069.7:52175757-52235699	56458	Foxo1	GO:0003700	DNA binding transcription factor activity
NR_024067.2	NM_019739.3	-0.868131	0.000251	small nucleolar RNA host gene 6	NC_000067.7:10012249-10014343	forkhead box O1	NC_000069.7:52175757-52257530	56458	Foxo1	GO:0003700	DNA binding transcription factor activity
NR_024067.2	NM_019995.4	0.720462	0.008216	small nucleolar RNA host gene 6	NC_000067.7:10012249-10014343	SPT20 SAGA complex component%2C transcript variant 3	NC_000069.7:54600525-54624321	56790	Supt20	GO:0000988	transcription factor activity, protein binding
NR_024067.2	NM_023214.7	-0.927764	1.4e-05	small nucleolar RNA host gene 6	NC_000067.7:10012249-10014343	solute carrier family 30 (zinc transporter)%2C member 7	NC_000069.7:115732621-115801055	66500	Slc30a7	GO:0003700	DNA binding transcription factor activity
NR_024067.2	XM_036163227.1	-0.772499	0.003228	small nucleolar RNA host gene 6	NC_000067.7:10012249-10014343	solute carrier family 30 (zinc transporter)%2C member 7%2C transcript variant X1	NC_000069.7:115765490-115801079	66500	Slc30a7	GO:0003700	DNA binding transcription factor activity
NR_024067.2	NM_008689.2	-0.886285	0.000123	small nucleolar RNA host gene 6	NC_000067.7:10012249-10014343	nuclear factor of kappa light polypeptide gene enhancer in B cells 1%2C p105	NC_000069.7:135290415-135397308	18033	Nfkb1	GO:0003700	DNA binding transcription factor activity
NR_024067.2	NM_013497.4	-0.877244	0.000178	small nucleolar RNA host gene 6	NC_000067.7:10012249-10014343	cAMP responsive element binding protein 3	NC_000070.7:43562657-43567061	12913	Creb3	GO:0003700	DNA binding transcription factor activity
NR_024067.2	NM_008687.6	-0.744003	0.005528	small nucleolar RNA host gene 6	NC_000067.7:10012249-10014343	nuclear factor I/B%2C transcript variant 3	NC_000070.7:82208409-82424016	18028	Nfib	GO:0003700	DNA binding transcription factor activity
NR_024067.2	XM_006537654.3	-0.728458	0.007212	small nucleolar RNA host gene 6	NC_000067.7:10012249-10014343	nuclear factor I/B%2C transcript variant X2	NC_000070.7:82208409-82424988	18028	Nfib	GO:0003700	DNA binding transcription factor activity
NR_024067.2	NM_029868.3	-0.774541	0.003098	small nucleolar RNA host gene 6	NC_000067.7:10012249-10014343	GC-rich promoter binding protein 1-like 1%2C transcript variant 1	NC_000070.7:116414854-116451099	77110	Gpbp1l1	GO:0003700	DNA binding transcription factor activity
NR_024067.2	NM_001290696.1	-0.827398	0.000896	small nucleolar RNA host gene 6	NC_000067.7:10012249-10014343	forkhead box J3%2C transcript variant 2	NC_000070.7:119396857-119486316	230700	Foxj3	GO:0003700	DNA binding transcription factor activity
NR_024067.2	XM_006539139.4	0.865835	0.000272	small nucleolar RNA host gene 6	NC_000067.7:10012249-10014343	arginine glutamic acid dipeptide (RE) repeats%2C transcript variant X5	NC_000070.7:150365371-150706423	68703	Rere	GO:0003700	DNA binding transcription factor activity
NR_024067.2	XM_030253743.2	0.816485	0.001194	small nucleolar RNA host gene 6	NC_000067.7:10012249-10014343	arginine glutamic acid dipeptide (RE) repeats%2C transcript variant X4	NC_000070.7:150365371-150706423	68703	Rere	GO:0003700	DNA binding transcription factor activity
NR_024067.2	XM_030253746.2	0.869003	0.000243	small nucleolar RNA host gene 6	NC_000067.7:10012249-10014343	arginine glutamic acid dipeptide (RE) repeats%2C transcript variant X8	NC_000070.7:150365371-150706423	68703	Rere	GO:0003700	DNA binding transcription factor activity
NR_024067.2	XM_030253751.2	0.817779	0.001155	small nucleolar RNA host gene 6	NC_000067.7:10012249-10014343	arginine glutamic acid dipeptide (RE) repeats%2C transcript variant X15	NC_000070.7:150561931-150706423	68703	Rere	GO:0003700	DNA binding transcription factor activity
NR_024067.2	TCONS_00005659	-0.707272	0.010094	small nucleolar RNA host gene 6	NC_000067.7:10012249-10014343	TCONS_00005659	NC_000070.7:150652957-150706423	68703	Rere	GO:0003700	DNA binding transcription factor activity
NR_024067.2	XM_006503796.5	-0.905022	5.2e-05	small nucleolar RNA host gene 6	NC_000067.7:10012249-10014343	recombination signal binding protein for immunoglobulin kappa J region%2C transcript variant X1	NC_000071.7:53766547-53814703	19664	Rbpj	GO:0003700	DNA binding transcription factor activity
NR_024067.2	NM_011537.3	0.714751	0.008994	small nucleolar RNA host gene 6	NC_000067.7:10012249-10014343	T-box 5	NC_000071.7:119972727-120023283	21388	Tbx5	GO:0003700	DNA binding transcription factor activity
NR_024067.2	XM_006504628.4	-0.755922	0.004452	small nucleolar RNA host gene 6	NC_000067.7:10012249-10014343	zinc finger with KRAB and SCAN domains 1%2C transcript variant X1	NC_000071.7:138083311-138106084	74570	Zkscan1	GO:0003700	DNA binding transcription factor activity
NR_024067.2	NM_016683.2	-0.776845	0.002955	small nucleolar RNA host gene 6	NC_000067.7:10012249-10014343	zinc finger with KRAB and SCAN domains 5%2C transcript variant 1	NC_000071.7:145141368-145158560	22757	Zkscan5	GO:0003700	DNA binding transcription factor activity
NR_024067.2	NM_001127330.2	-0.703951	0.010614	small nucleolar RNA host gene 6	NC_000067.7:10012249-10014343	peroxisome proliferator activated receptor gamma%2C transcript variant 1	NC_000072.7:115337911-115467362	19016	Pparg	GO:0003700	DNA binding transcription factor activity
NR_024067.2	XM_036166087.1	-0.74599	0.005336	small nucleolar RNA host gene 6	NC_000067.7:10012249-10014343	cAMP responsive element binding protein-like 2%2C transcript variant X2	NC_000072.7:134807422-134835894	232430	Crebl2	GO:0003700	DNA binding transcription factor activity
NR_024067.2	TCONS_00009475	-0.713807	0.009127	small nucleolar RNA host gene 6	NC_000067.7:10012249-10014343	TCONS_00009475	NC_000073.7:12531329-12532991	232875	Zscan18	GO:0003700	DNA binding transcription factor activity
NR_024067.2	TCONS_00010406	-0.824414	0.000971	small nucleolar RNA host gene 6	NC_000067.7:10012249-10014343	TCONS_00010406	NC_000073.7:19339987-19354009	19698	Relb	GO:0003700	DNA binding transcription factor activity
NR_024067.2	TCONS_00010553	-0.911508	3.7e-05	small nucleolar RNA host gene 6	NC_000067.7:10012249-10014343	TCONS_00010553	NC_000073.7:34611846-34755991	12611	Cebpg	GO:0003700	DNA binding transcription factor activity
NR_024067.2	NM_011565.3	0.835362	0.000718	small nucleolar RNA host gene 6	NC_000067.7:10012249-10014343	TEA domain family member 2%2C transcript variant 2	NC_000073.7:44865215-44882892	21677	Tead2	GO:0003700	DNA binding transcription factor activity
NR_024067.2	NM_001382511.1	0.741708	0.005756	small nucleolar RNA host gene 6	NC_000067.7:10012249-10014343	zinc finger and SCAN domain containing 2%2C transcript variant 2	NC_000073.7:80510678-80526290	22691	Zscan2	GO:0003700	DNA binding transcription factor activity
NR_024067.2	NM_145151.3	-0.918663	2.4e-05	small nucleolar RNA host gene 6	NC_000067.7:10012249-10014343	CREB/ATF bZIP transcription factor%2C transcript variant 1	NC_000073.7:90091988-90097251	233490	Crebzf	GO:0003700	DNA binding transcription factor activity
NR_024067.2	NM_001166585.2	-0.828898	0.00086	small nucleolar RNA host gene 6	NC_000067.7:10012249-10014343	TEA domain family member 1%2C transcript variant 3	NC_000073.7:112278562-112505991	21676	Tead1	GO:0003700	DNA binding transcription factor activity
NR_024067.2	XM_011242265.3	-0.784474	0.002518	small nucleolar RNA host gene 6	NC_000067.7:10012249-10014343	nuclear receptor subfamily 2%2C group F%2C member 6%2C transcript variant X4	NC_000074.7:71826761-71831012	13864	Nr2f6	GO:0003700	DNA binding transcription factor activity
NR_024067.2	NM_010150.2	-0.841652	0.000597	small nucleolar RNA host gene 6	NC_000067.7:10012249-10014343	nuclear receptor subfamily 2%2C group F%2C member 6	NC_000074.7:71826762-71834596	13864	Nr2f6	GO:0003700	DNA binding transcription factor activity
NR_024067.2	NM_008539.4	-0.730778	0.006939	small nucleolar RNA host gene 6	NC_000067.7:10012249-10014343	SMAD family member 1	NC_000074.7:80065023-80126057	17125	Smad1	GO:0003700	DNA binding transcription factor activity
NR_024067.2	NM_001161458.1	-0.705824	0.010318	small nucleolar RNA host gene 6	NC_000067.7:10012249-10014343	core binding factor beta%2C transcript variant 4	NC_000074.7:105897305-105944621	12400	Cbfb	GO:0000988	transcription factor activity, protein binding
NR_024067.2	NM_010901.3	-0.747631	0.005182	small nucleolar RNA host gene 6	NC_000067.7:10012249-10014343	nuclear factor of activated T cells%2C cytoplasmic%2C calcineurin dependent 3%2C transcript variant 1	NC_000074.7:106786221-106857169	18021	Nfatc3	GO:0003700	DNA binding transcription factor activity
NR_024067.2	NM_008320.4	0.758014	0.004281	small nucleolar RNA host gene 6	NC_000067.7:10012249-10014343	interferon regulatory factor 8%2C transcript variant 2	NC_000074.7:121463096-121483433	15900	Irf8	GO:0003700	DNA binding transcription factor activity
NR_024067.2	NM_001301811.1	-0.88559	0.000127	small nucleolar RNA host gene 6	NC_000067.7:10012249-10014343	interferon regulatory factor 8%2C transcript variant 1	NC_000074.7:121465377-121483433	15900	Irf8	GO:0003700	DNA binding transcription factor activity
NR_024067.2	NM_177289.1	0.730946	0.00692	small nucleolar RNA host gene 6	NC_000067.7:10012249-10014343	CBFA2/RUNX1 translocation partner 3%2C transcript variant 3	NC_000074.7:123351874-123404914	12398	Cbfa2t3	GO:0003700	DNA binding transcription factor activity
NR_024067.2	TCONS_00012478	-0.850748	0.000451	small nucleolar RNA host gene 6	NC_000067.7:10012249-10014343	TCONS_00012478	NC_000074.7:123351876-123404914	12398	Cbfa2t3	GO:0003700	DNA binding transcription factor activity
NR_024067.2	NM_001372534.1	-0.729608	0.007076	small nucleolar RNA host gene 6	NC_000067.7:10012249-10014343	E26 avian leukemia oncogene 1%2C 5' domain%2C transcript variant 3	NC_000075.7:32547536-32669116	23871	Ets1	GO:0003700	DNA binding transcription factor activity
NR_024067.2	NM_011808.3	-0.700378	0.011194	small nucleolar RNA host gene 6	NC_000067.7:10012249-10014343	E26 avian leukemia oncogene 1%2C 5' domain%2C transcript variant 1	NC_000075.7:32607332-32669116	23871	Ets1	GO:0003700	DNA binding transcription factor activity
NR_024067.2	NM_001359464.1	-0.791388	0.002166	small nucleolar RNA host gene 6	NC_000067.7:10012249-10014343	zinc finger protein 202%2C transcript variant 2	NC_000075.7:40103611-40124900	80902	Zfp202	GO:0003700	DNA binding transcription factor activity
NR_024067.2	NM_016769.4	-0.725135	0.007618	small nucleolar RNA host gene 6	NC_000067.7:10012249-10014343	SMAD family member 3	NC_000075.7:63554048-63665276	17127	Smad3	GO:0003700	DNA binding transcription factor activity
NR_024067.2	NM_183316.2	0.921304	2.1e-05	small nucleolar RNA host gene 6	NC_000067.7:10012249-10014343	small nuclear RNA activating complex%2C polypeptide 5	NC_000075.7:64086578-64089970	330959	Snapc5	GO:0003700	DNA binding transcription factor activity
NR_024067.2	NM_023814.4	-0.833315	0.000761	small nucleolar RNA host gene 6	NC_000067.7:10012249-10014343	T-box18	NC_000075.7:87584852-87613313	76365	Tbx18	GO:0003700	DNA binding transcription factor activity
NR_024067.2	TCONS_00013922	-0.749412	0.005018	small nucleolar RNA host gene 6	NC_000067.7:10012249-10014343	TCONS_00013922	NC_000075.7:122677987-122695059	235682	Zfp445	GO:0003700	DNA binding transcription factor activity
NR_024067.2	XM_006513335.4	0.779369	0.002804	small nucleolar RNA host gene 6	NC_000067.7:10012249-10014343	nuclear factor I/C%2C transcript variant X1	NC_000076.7:81232024-81267753	18029	Nfic	GO:0003700	DNA binding transcription factor activity
NR_024067.2	XM_030244940.1	0.763491	0.003856	small nucleolar RNA host gene 6	NC_000067.7:10012249-10014343	nuclear factor I/C%2C transcript variant X2	NC_000076.7:81232024-81267753	18029	Nfic	GO:0003700	DNA binding transcription factor activity
NR_024067.2	XM_030244871.2	0.738527	0.006083	small nucleolar RNA host gene 6	NC_000067.7:10012249-10014343	ELK3%2C member of ETS oncogene family%2C transcript variant X1	NC_000076.7:93083276-93146402	13713	Elk3	GO:0003700	DNA binding transcription factor activity
NR_024067.2	XM_036155891.1	-0.766075	0.003667	small nucleolar RNA host gene 6	NC_000067.7:10012249-10014343	E2F transcription factor 7%2C transcript variant X1	NC_000076.7:110580798-110623234	52679	E2f7	GO:0003700	DNA binding transcription factor activity
NR_024067.2	NM_009284.2	-0.900856	6.4e-05	small nucleolar RNA host gene 6	NC_000067.7:10012249-10014343	signal transducer and activator of transcription 6	NC_000076.7:127478854-127496856	20852	Stat6	GO:0003700	DNA binding transcription factor activity
NR_024067.2	NM_013842.3	-0.891392	9.9e-05	small nucleolar RNA host gene 6	NC_000067.7:10012249-10014343	X-box binding protein 1%2C transcript variant 1	NC_000077.7:5470640-5475993	22433	Xbp1	GO:0003700	DNA binding transcription factor activity
NR_024067.2	NM_009044.3	-0.725382	0.007587	small nucleolar RNA host gene 6	NC_000067.7:10012249-10014343	reticuloendotheliosis oncogene	NC_000077.7:23686846-23720969	19696	Rel	GO:0003700	DNA binding transcription factor activity
NR_024067.2	XM_030246033.1	0.700194	0.011225	small nucleolar RNA host gene 6	NC_000067.7:10012249-10014343	zinc finger with KRAB and SCAN domains 17%2C transcript variant X8	NC_000077.7:59376345-59397082	268417	Zkscan17	GO:0003700	DNA binding transcription factor activity
NR_024067.2	NM_009024.2	0.709155	0.009808	small nucleolar RNA host gene 6	NC_000067.7:10012249-10014343	retinoic acid receptor%2C alpha%2C transcript variant 1	NC_000077.7:98828521-98865768	19401	Rara	GO:0003700	DNA binding transcription factor activity
NR_024067.2	NM_001113563.2	-0.845998	0.000524	small nucleolar RNA host gene 6	NC_000067.7:10012249-10014343	signal transducer and activator of transcription 5B%2C transcript variant 2	NC_000077.7:100671556-100741407	20851	Stat5b	GO:0003700	DNA binding transcription factor activity
NR_024067.2	NM_007840.3	-0.70305	0.010758	small nucleolar RNA host gene 6	NC_000067.7:10012249-10014343	DEAD box helicase 5	NC_000077.7:106671181-106679320	13207	Ddx5	GO:0000988	transcription factor activity, protein binding
NR_024067.2	TCONS_00017083	-0.777114	0.002939	small nucleolar RNA host gene 6	NC_000067.7:10012249-10014343	TCONS_00017083	NC_000077.7:106673520-106679733	13207	Ddx5	GO:0000988	transcription factor activity, protein binding
NR_024067.2	NM_033270.2	-0.857228	0.000366	small nucleolar RNA host gene 6	NC_000067.7:10012249-10014343	E2F transcription factor 6%2C transcript variant 1	NC_000078.7:16860965-16876753	50496	E2f6	GO:0003700	DNA binding transcription factor activity
NR_024067.2	XM_006515149.5	-0.815871	0.001213	small nucleolar RNA host gene 6	NC_000067.7:10012249-10014343	E2F transcription factor 6%2C transcript variant X4	NC_000078.7:16863938-16876753	50496	E2f6	GO:0003700	DNA binding transcription factor activity
NR_024067.2	NM_016684.2	0.72306	0.007879	small nucleolar RNA host gene 6	NC_000067.7:10012249-10014343	zinc finger and SCAN domain containing 12	NC_000079.7:21546989-21556472	22758	Zscan12	GO:0003700	DNA binding transcription factor activity
NR_024067.2	NM_011243.2	-0.882365	0.000145	small nucleolar RNA host gene 6	NC_000067.7:10012249-10014343	retinoic acid receptor%2C beta%2C transcript variant beta2	NC_000080.7:5894286-6038924	218772	Rarb	GO:0003700	DNA binding transcription factor activity
NR_024067.2	NM_008092.4	-0.7073	0.01009	small nucleolar RNA host gene 6	NC_000067.7:10012249-10014343	GATA binding protein 4%2C transcript variant 2	NC_000080.7:63436362-63482720	14463	Gata4	GO:0003700	DNA binding transcription factor activity
NR_024067.2	NM_009366.4	-0.912707	3.4e-05	small nucleolar RNA host gene 6	NC_000067.7:10012249-10014343	TSC22 domain family%2C member 1%2C transcript variant 2	NC_000080.7:76741949-76745205	21807	Tsc22d1	GO:0003700	DNA binding transcription factor activity
NR_024067.2	NM_007920.4	-0.825514	0.000943	small nucleolar RNA host gene 6	NC_000067.7:10012249-10014343	E74-like factor 1%2C transcript variant 1	NC_000080.7:79718633-79819931	13709	Elf1	GO:0003700	DNA binding transcription factor activity
NR_024067.2	XM_017316729.3	-0.722109	0.008001	small nucleolar RNA host gene 6	NC_000067.7:10012249-10014343	metadherin%2C transcript variant X4	NC_000081.7:34082612-34143683	67154	Mtdh	GO:0003700	DNA binding transcription factor activity
NR_024067.2	NM_001357926.1	-0.720535	0.008206	small nucleolar RNA host gene 6	NC_000067.7:10012249-10014343	metadherin%2C transcript variant 1	NC_000081.7:34082864-34143683	67154	Mtdh	GO:0003700	DNA binding transcription factor activity
NR_024067.2	NM_009716.3	-0.857049	0.000368	small nucleolar RNA host gene 6	NC_000067.7:10012249-10014343	activating transcription factor 4%2C transcript variant 1	NC_000081.7:80139384-80141746	11911	Atf4	GO:0003700	DNA binding transcription factor activity
NR_024067.2	NM_177821.6	-0.705421	0.010381	small nucleolar RNA host gene 6	NC_000067.7:10012249-10014343	E1A binding protein p300	NC_000081.7:81470414-81536278	328572	Ep300	GO:0000988	transcription factor activity, protein binding
NR_024067.2	XM_011245517.4	0.702302	0.010879	small nucleolar RNA host gene 6	NC_000067.7:10012249-10014343	peroxisome proliferator activated receptor alpha%2C transcript variant X3	NC_000081.7:85619111-85691052	19013	Ppara	GO:0003700	DNA binding transcription factor activity
NR_024067.2	NM_007497.3	-0.891311	9.9e-05	small nucleolar RNA host gene 6	NC_000067.7:10012249-10014343	activating transcription factor 1	NC_000081.7:100125739-100159129	11908	Atf1	GO:0003700	DNA binding transcription factor activity
NR_024067.2	XM_006520351.5	-0.837735	0.00067	small nucleolar RNA host gene 6	NC_000067.7:10012249-10014343	activating transcription factor 1%2C transcript variant X1	NC_000081.7:100126109-100159129	11908	Atf1	GO:0003700	DNA binding transcription factor activity
NR_024067.2	NM_001081217.1	-0.734262	0.006544	small nucleolar RNA host gene 6	NC_000067.7:10012249-10014343	zinc finger protein 174	NC_000082.7:3665086-3676744	385674	Zfp174	GO:0003700	DNA binding transcription factor activity
NR_024067.2	NM_001025432.1	0.887488	0.000117	small nucleolar RNA host gene 6	NC_000067.7:10012249-10014343	CREB binding protein	NC_000082.7:3901911-4031268	12914	Crebbp	GO:0000988	transcription factor activity, protein binding
NR_024067.2	NM_007679.4	-0.716275	0.008781	small nucleolar RNA host gene 6	NC_000067.7:10012249-10014343	CCAAT/enhancer binding protein (C/EBP)%2C delta	NC_000082.7:15705149-15707409	12609	Cebpd	GO:0003700	DNA binding transcription factor activity
NR_024067.2	XM_030248977.2	0.747461	0.005197	small nucleolar RNA host gene 6	NC_000067.7:10012249-10014343	GA repeat binding protein%2C alpha%2C transcript variant X7	NC_000082.7:84631794-84660671	14390	Gabpa	GO:0003700	DNA binding transcription factor activity
NR_024067.2	NM_001302153.1	0.76909	0.003456	small nucleolar RNA host gene 6	NC_000067.7:10012249-10014343	ETS transcription factor%2C transcript variant 3	NC_000082.7:95160027-95260207	13876	Erg	GO:0003700	DNA binding transcription factor activity
NR_024067.2	NM_011809.3	-0.884821	0.000131	small nucleolar RNA host gene 6	NC_000067.7:10012249-10014343	E26 avian leukemia oncogene 2%2C 3' domain	NC_000082.7:95503273-95522093	23872	Ets2	GO:0003700	DNA binding transcription factor activity
NR_024067.2	NM_001033496.3	-0.865037	0.00028	small nucleolar RNA host gene 6	NC_000067.7:10012249-10014343	zinc finger protein 213	NC_000083.7:23775740-23783200	449521	Zfp213	GO:0003700	DNA binding transcription factor activity
NR_024067.2	TCONS_00022266	-0.882427	0.000145	small nucleolar RNA host gene 6	NC_000067.7:10012249-10014343	TCONS_00022266	NC_000083.7:34247248-34257377	20182	Rxrb	GO:0003700	DNA binding transcription factor activity
NR_024067.2	NM_001205214.1	0.707455	0.010066	small nucleolar RNA host gene 6	NC_000067.7:10012249-10014343	retinoid X receptor beta%2C transcript variant 1	NC_000083.7:34250785-34257377	20182	Rxrb	GO:0003700	DNA binding transcription factor activity
NR_024067.2	NM_011306.4	0.916973	2.7e-05	small nucleolar RNA host gene 6	NC_000067.7:10012249-10014343	retinoid X receptor beta%2C transcript variant 2	NC_000083.7:34250785-34257377	20182	Rxrb	GO:0003700	DNA binding transcription factor activity
NR_024067.2	NM_017406.4	-0.848296	0.000488	small nucleolar RNA host gene 6	NC_000067.7:10012249-10014343	activating transcription factor 6 beta	NC_000083.7:34866119-34874048	12915	Atf6b	GO:0003700	DNA binding transcription factor activity
NR_024067.2	NM_027007.2	0.785994	0.002437	small nucleolar RNA host gene 6	NC_000067.7:10012249-10014343	zinc finger protein 397	NC_000084.7:24087744-24097728	69256	Zfp397	GO:0003700	DNA binding transcription factor activity
NR_024067.2	NM_001357447.1	-0.865655	0.000274	small nucleolar RNA host gene 6	NC_000067.7:10012249-10014343	zinc finger protein 24%2C transcript variant 2	NC_000084.7:24142773-24153427	59057	Zfp24	GO:0003700	DNA binding transcription factor activity
NR_024067.2	NM_001361211.1	-0.790617	0.002203	small nucleolar RNA host gene 6	NC_000067.7:10012249-10014343	nuclear receptor subfamily 3%2C group C%2C member 1%2C transcript variant 4	NC_000084.7:39543597-39622829	14815	Nr3c1	GO:0003700	DNA binding transcription factor activity
NR_024067.2	NM_001361209.1	-0.721529	0.008076	small nucleolar RNA host gene 6	NC_000067.7:10012249-10014343	nuclear receptor subfamily 3%2C group C%2C member 1%2C transcript variant 2	NC_000084.7:39543597-39623723	14815	Nr3c1	GO:0003700	DNA binding transcription factor activity
NR_024067.2	NM_007953.2	-0.884054	0.000135	small nucleolar RNA host gene 6	NC_000067.7:10012249-10014343	estrogen related receptor%2C alpha	NC_000085.7:6888344-6899176	26379	Esrra	GO:0003700	DNA binding transcription factor activity
NR_024067.2	NM_001381876.1	-0.83261	0.000776	small nucleolar RNA host gene 6	NC_000067.7:10012249-10014343	E74-like factor 4 (ets domain transcription factor)%2C transcript variant 1	NC_000086.8:47499926-47543196	56501	Elf4	GO:0003700	DNA binding transcription factor activity
NR_024067.2	XM_036162179.1	-0.844762	0.000544	small nucleolar RNA host gene 6	NC_000067.7:10012249-10014343	activating transcription factor 1%2C pseudogene	NC_000086.8:52885449-52886480	100040260	Atf1-ps	GO:0003700	DNA binding transcription factor activity
NR_024067.2	XM_006528139.3	0.707467	0.010064	small nucleolar RNA host gene 6	NC_000067.7:10012249-10014343	forkhead box O4%2C transcript variant X1	NC_000086.8:100297854-100301320	54601	Foxo4	GO:0003700	DNA binding transcription factor activity
NR_024067.2	NM_018789.2	-0.888905	0.00011	small nucleolar RNA host gene 6	NC_000067.7:10012249-10014343	forkhead box O4	NC_000086.8:100298133-100304479	54601	Foxo4	GO:0003700	DNA binding transcription factor activity
NR_024067.2	TCONS_00025632	-0.825528	0.000942	small nucleolar RNA host gene 6	NC_000067.7:10012249-10014343	TCONS_00025632	NC_000086.8:139440276-139447588	14605	Tsc22d3	GO:0003700	DNA binding transcription factor activity
NR_024067.2	TCONS_00025637	-0.750437	0.004925	small nucleolar RNA host gene 6	NC_000067.7:10012249-10014343	TCONS_00025637	NC_000086.8:139474353-139499523	14605	Tsc22d3	GO:0003700	DNA binding transcription factor activity
TCONS_00000023	NM_009107.3	-0.702079	0.010915	TCONS_00000023	NC_000067.7:11093426-11103295	retinoid X receptor gamma%2C transcript variant 1	NC_000067.7:167425930-167467192	20183	Rxrg	GO:0003700	DNA binding transcription factor activity
TCONS_00000023	TCONS_00001431	0.83628	0.000699	TCONS_00000023	NC_000067.7:11093426-11103295	TCONS_00001431	NC_000067.7:167947715-168259738	18514	Pbx1	GO:0003700	DNA binding transcription factor activity
TCONS_00000023	XM_011238796.4	0.711708	0.00943	TCONS_00000023	NC_000067.7:11093426-11103295	activating transcription factor 6%2C transcript variant X2	NC_000067.7:170532244-170696154	226641	Atf6	GO:0003700	DNA binding transcription factor activity
TCONS_00000023	NM_011305.3	0.827337	0.000897	TCONS_00000023	NC_000067.7:11093426-11103295	retinoid X receptor alpha%2C transcript variant 1	NC_000068.8:27567212-27653331	20181	Rxra	GO:0003700	DNA binding transcription factor activity
TCONS_00000023	NM_020255.3	-0.821981	0.001036	TCONS_00000023	NC_000067.7:11093426-11103295	SCAN domain-containing 1	NC_000068.8:156153765-156154624	19018	Scand1	GO:0003700	DNA binding transcription factor activity
TCONS_00000023	NM_007892.2	0.725334	0.007593	TCONS_00000023	NC_000067.7:11093426-11103295	E2F transcription factor 5	NC_000069.7:14643730-14671369	13559	E2f5	GO:0003700	DNA binding transcription factor activity
TCONS_00000023	XM_006502034.5	0.835795	0.000709	TCONS_00000023	NC_000067.7:11093426-11103295	E74-like factor 2%2C transcript variant X13	NC_000069.7:51162705-51184879	69257	Elf2	GO:0003700	DNA binding transcription factor activity
TCONS_00000023	XM_030252807.1	0.747971	0.00515	TCONS_00000023	NC_000067.7:11093426-11103295	E74-like factor 2%2C transcript variant X14	NC_000069.7:51162705-51247925	69257	Elf2	GO:0003700	DNA binding transcription factor activity
TCONS_00000023	TCONS_00003816	0.84901	0.000477	TCONS_00000023	NC_000067.7:11093426-11103295	TCONS_00003816	NC_000069.7:52175757-52235699	56458	Foxo1	GO:0003700	DNA binding transcription factor activity
TCONS_00000023	NM_019739.3	0.792068	0.002134	TCONS_00000023	NC_000067.7:11093426-11103295	forkhead box O1	NC_000069.7:52175757-52257530	56458	Foxo1	GO:0003700	DNA binding transcription factor activity
TCONS_00000023	NM_001081229.2	0.821442	0.00105	TCONS_00000023	NC_000067.7:11093426-11103295	TSC22 domain family%2C member 2%2C transcript variant 1	NC_000069.7:58322140-58374208	72033	Tsc22d2	GO:0003700	DNA binding transcription factor activity
TCONS_00000023	XM_036163055.1	0.703314	0.010715	TCONS_00000023	NC_000067.7:11093426-11103295	GATA zinc finger domain containing 2B%2C transcript variant X3	NC_000069.7:90225295-90269530	229542	Gatad2b	GO:0003700	DNA binding transcription factor activity
TCONS_00000023	NM_023214.7	0.730147	0.007013	TCONS_00000023	NC_000067.7:11093426-11103295	solute carrier family 30 (zinc transporter)%2C member 7	NC_000069.7:115732621-115801055	66500	Slc30a7	GO:0003700	DNA binding transcription factor activity
TCONS_00000023	NM_008689.2	0.813438	0.001289	TCONS_00000023	NC_000067.7:11093426-11103295	nuclear factor of kappa light polypeptide gene enhancer in B cells 1%2C p105	NC_000069.7:135290415-135397308	18033	Nfkb1	GO:0003700	DNA binding transcription factor activity
TCONS_00000023	XM_006537572.3	0.744306	0.005498	TCONS_00000023	NC_000067.7:11093426-11103295	RUNX1 translocation partner 1%2C transcript variant X6	NC_000070.7:13743746-13895056	12395	Runx1t1	GO:0003700	DNA binding transcription factor activity
TCONS_00000023	XM_030253119.2	0.710955	0.00954	TCONS_00000023	NC_000067.7:11093426-11103295	RUNX1 translocation partner 1%2C transcript variant X7	NC_000070.7:13797031-13895056	12395	Runx1t1	GO:0003700	DNA binding transcription factor activity
TCONS_00000023	XM_006537653.5	0.715113	0.008943	TCONS_00000023	NC_000067.7:11093426-11103295	nuclear factor I/B%2C transcript variant X1	NC_000070.7:82208409-82422947	18028	Nfib	GO:0003700	DNA binding transcription factor activity
TCONS_00000023	NM_029868.3	0.742799	0.005647	TCONS_00000023	NC_000067.7:11093426-11103295	GC-rich promoter binding protein 1-like 1%2C transcript variant 1	NC_000070.7:116414854-116451099	77110	Gpbp1l1	GO:0003700	DNA binding transcription factor activity
TCONS_00000023	TCONS_00005659	0.781794	0.002665	TCONS_00000023	NC_000067.7:11093426-11103295	TCONS_00005659	NC_000070.7:150652957-150706423	68703	Rere	GO:0003700	DNA binding transcription factor activity
TCONS_00000023	XM_036164921.1	0.728027	0.007264	TCONS_00000023	NC_000067.7:11093426-11103295	recombination signal binding protein for immunoglobulin kappa J region%2C transcript variant X4	NC_000071.7:53759203-53814703	19664	Rbpj	GO:0003700	DNA binding transcription factor activity
TCONS_00000023	XM_006503796.5	0.871977	0.000218	TCONS_00000023	NC_000067.7:11093426-11103295	recombination signal binding protein for immunoglobulin kappa J region%2C transcript variant X1	NC_000071.7:53766547-53814703	19664	Rbpj	GO:0003700	DNA binding transcription factor activity
TCONS_00000023	NM_133921.3	0.763492	0.003856	TCONS_00000023	NC_000067.7:11093426-11103295	nuclear transcription factor%2C X-box binding-like 1%2C transcript variant 1	NC_000071.7:72670646-72716988	100978	Nfxl1	GO:0003700	DNA binding transcription factor activity
TCONS_00000023	NM_133906.4	0.828714	0.000864	TCONS_00000023	NC_000067.7:11093426-11103295	zinc finger with KRAB and SCAN domains 1%2C transcript variant 1	NC_000071.7:138083345-138106084	74570	Zkscan1	GO:0003700	DNA binding transcription factor activity
TCONS_00000023	NM_016683.2	0.760598	0.004076	TCONS_00000023	NC_000067.7:11093426-11103295	zinc finger with KRAB and SCAN domains 5%2C transcript variant 1	NC_000071.7:145141368-145158560	22757	Zkscan5	GO:0003700	DNA binding transcription factor activity
TCONS_00000023	XM_030255069.2	-0.728219	0.007241	TCONS_00000023	NC_000067.7:11093426-11103295	forkhead box P1%2C transcript variant X32	NC_000072.7:98902302-99074080	108655	Foxp1	GO:0003700	DNA binding transcription factor activity
TCONS_00000023	XM_036165728.1	0.711309	0.009488	TCONS_00000023	NC_000067.7:11093426-11103295	forkhead box P1%2C transcript variant X2	NC_000072.7:98902302-99510587	108655	Foxp1	GO:0003700	DNA binding transcription factor activity
TCONS_00000023	NM_001127330.2	0.837356	0.000678	TCONS_00000023	NC_000067.7:11093426-11103295	peroxisome proliferator activated receptor gamma%2C transcript variant 1	NC_000072.7:115337911-115467362	19016	Pparg	GO:0003700	DNA binding transcription factor activity
TCONS_00000023	XM_036166087.1	0.941336	5e-06	TCONS_00000023	NC_000067.7:11093426-11103295	cAMP responsive element binding protein-like 2%2C transcript variant X2	NC_000072.7:134807422-134835894	232430	Crebl2	GO:0003700	DNA binding transcription factor activity
TCONS_00000023	TCONS_00010553	0.80843	0.001459	TCONS_00000023	NC_000067.7:11093426-11103295	TCONS_00010553	NC_000073.7:34611846-34755991	12611	Cebpg	GO:0003700	DNA binding transcription factor activity
TCONS_00000023	NM_011565.3	-0.723584	0.007812	TCONS_00000023	NC_000067.7:11093426-11103295	TEA domain family member 2%2C transcript variant 2	NC_000073.7:44865215-44882892	21677	Tead2	GO:0003700	DNA binding transcription factor activity
TCONS_00000023	NM_145151.3	0.845966	0.000524	TCONS_00000023	NC_000067.7:11093426-11103295	CREB/ATF bZIP transcription factor%2C transcript variant 1	NC_000073.7:90091988-90097251	233490	Crebzf	GO:0003700	DNA binding transcription factor activity
TCONS_00000023	NM_001166585.2	0.75453	0.004569	TCONS_00000023	NC_000067.7:11093426-11103295	TEA domain family member 1%2C transcript variant 3	NC_000073.7:112278562-112505991	21676	Tead1	GO:0003700	DNA binding transcription factor activity
TCONS_00000023	XM_011242265.3	0.701857	0.010951	TCONS_00000023	NC_000067.7:11093426-11103295	nuclear receptor subfamily 2%2C group F%2C member 6%2C transcript variant X4	NC_000074.7:71826761-71831012	13864	Nr2f6	GO:0003700	DNA binding transcription factor activity
TCONS_00000023	NM_010150.2	0.767229	0.003585	TCONS_00000023	NC_000067.7:11093426-11103295	nuclear receptor subfamily 2%2C group F%2C member 6	NC_000074.7:71826762-71834596	13864	Nr2f6	GO:0003700	DNA binding transcription factor activity
TCONS_00000023	TCONS_00011523	0.734486	0.006519	TCONS_00000023	NC_000067.7:11093426-11103295	TCONS_00011523	NC_000074.7:77628957-77673956	110784	Nr3c2	GO:0003700	DNA binding transcription factor activity
TCONS_00000023	NM_001297601.2	0.702679	0.010818	TCONS_00000023	NC_000067.7:11093426-11103295	nuclear factor I/X%2C transcript variant 4	NC_000074.7:85431340-85500039	18032	Nfix	GO:0003700	DNA binding transcription factor activity
TCONS_00000023	XM_036153804.1	-0.790373	0.002215	TCONS_00000023	NC_000067.7:11093426-11103295	nuclear factor I/X%2C transcript variant X20	NC_000074.7:85431345-85527086	18032	Nfix	GO:0003700	DNA binding transcription factor activity
TCONS_00000023	NM_022309.4	0.817393	0.001166	TCONS_00000023	NC_000067.7:11093426-11103295	core binding factor beta%2C transcript variant 1	NC_000074.7:105897305-105944621	12400	Cbfb	GO:0000988	transcription factor activity, protein binding
TCONS_00000023	NM_001301811.1	0.802372	0.001686	TCONS_00000023	NC_000067.7:11093426-11103295	interferon regulatory factor 8%2C transcript variant 1	NC_000074.7:121465377-121483433	15900	Irf8	GO:0003700	DNA binding transcription factor activity
TCONS_00000023	NM_001372534.1	0.836299	0.000699	TCONS_00000023	NC_000067.7:11093426-11103295	E26 avian leukemia oncogene 1%2C 5' domain%2C transcript variant 3	NC_000075.7:32547536-32669116	23871	Ets1	GO:0003700	DNA binding transcription factor activity
TCONS_00000023	NM_183316.2	-0.80729	0.001499	TCONS_00000023	NC_000067.7:11093426-11103295	small nuclear RNA activating complex%2C polypeptide 5	NC_000075.7:64086578-64089970	330959	Snapc5	GO:0003700	DNA binding transcription factor activity
TCONS_00000023	NM_001289916.1	0.838467	0.000656	TCONS_00000023	NC_000067.7:11093426-11103295	RAR-related orphan receptor alpha%2C transcript variant 2	NC_000075.7:69197122-69295528	19883	Rora	GO:0003700	DNA binding transcription factor activity
TCONS_00000023	NM_023814.4	0.728191	0.007244	TCONS_00000023	NC_000067.7:11093426-11103295	T-box18	NC_000075.7:87584852-87613313	76365	Tbx18	GO:0003700	DNA binding transcription factor activity
TCONS_00000023	TCONS_00013921	0.732904	0.006696	TCONS_00000023	NC_000067.7:11093426-11103295	TCONS_00013921	NC_000075.7:122677987-122695059	235682	Zfp445	GO:0003700	DNA binding transcription factor activity
TCONS_00000023	TCONS_00013922	0.710648	0.009586	TCONS_00000023	NC_000067.7:11093426-11103295	TCONS_00013922	NC_000075.7:122677987-122695059	235682	Zfp445	GO:0003700	DNA binding transcription factor activity
TCONS_00000023	XM_006512565.5	0.737445	0.006198	TCONS_00000023	NC_000067.7:11093426-11103295	heat shock factor 2%2C transcript variant X2	NC_000076.7:57362703-57388966	15500	Hsf2	GO:0003700	DNA binding transcription factor activity
TCONS_00000023	NM_001322268.1	0.746879	0.005252	TCONS_00000023	NC_000067.7:11093426-11103295	ELK3%2C member of ETS oncogene family%2C transcript variant 2	NC_000076.7:93083277-93147021	13713	Elk3	GO:0003700	DNA binding transcription factor activity
TCONS_00000023	NM_009284.2	0.922096	2e-05	TCONS_00000023	NC_000067.7:11093426-11103295	signal transducer and activator of transcription 6	NC_000076.7:127478854-127496856	20852	Stat6	GO:0003700	DNA binding transcription factor activity
TCONS_00000023	NM_013842.3	0.82992	0.000836	TCONS_00000023	NC_000067.7:11093426-11103295	X-box binding protein 1%2C transcript variant 1	NC_000077.7:5470640-5475993	22433	Xbp1	GO:0003700	DNA binding transcription factor activity
TCONS_00000023	TCONS_00016947	0.833152	0.000764	TCONS_00000023	NC_000067.7:11093426-11103295	TCONS_00016947	NC_000077.7:98632465-98666203	217166	Nr1d1	GO:0003700	DNA binding transcription factor activity
TCONS_00000023	NM_001113563.2	0.813344	0.001292	TCONS_00000023	NC_000067.7:11093426-11103295	signal transducer and activator of transcription 5B%2C transcript variant 2	NC_000077.7:100671556-100741407	20851	Stat5b	GO:0003700	DNA binding transcription factor activity
TCONS_00000023	NM_033270.2	0.794204	0.002034	TCONS_00000023	NC_000067.7:11093426-11103295	E2F transcription factor 6%2C transcript variant 1	NC_000078.7:16860965-16876753	50496	E2f6	GO:0003700	DNA binding transcription factor activity
TCONS_00000023	XM_006514968.5	-0.721082	0.008134	TCONS_00000023	NC_000067.7:11093426-11103295	ets variant 1%2C transcript variant X4	NC_000078.7:38829654-38920484	14009	Etv1	GO:0003700	DNA binding transcription factor activity
TCONS_00000023	XM_017315205.2	0.767831	0.003543	TCONS_00000023	NC_000067.7:11093426-11103295	forkhead box N3%2C transcript variant X11	NC_000078.7:99156339-99359248	71375	Foxn3	GO:0003700	DNA binding transcription factor activity
TCONS_00000023	NM_008541.3	0.730218	0.007005	TCONS_00000023	NC_000067.7:11093426-11103295	SMAD family member 5%2C transcript variant 1	NC_000079.7:56850822-56890191	17129	Smad5	GO:0003700	DNA binding transcription factor activity
TCONS_00000023	NM_011243.2	0.841261	0.000604	TCONS_00000023	NC_000067.7:11093426-11103295	retinoic acid receptor%2C beta%2C transcript variant beta2	NC_000080.7:5894286-6038924	218772	Rarb	GO:0003700	DNA binding transcription factor activity
TCONS_00000023	NM_009366.4	0.789621	0.002252	TCONS_00000023	NC_000067.7:11093426-11103295	TSC22 domain family%2C member 1%2C transcript variant 2	NC_000080.7:76741949-76745205	21807	Tsc22d1	GO:0003700	DNA binding transcription factor activity
TCONS_00000023	NM_007920.4	0.773457	0.003167	TCONS_00000023	NC_000067.7:11093426-11103295	E74-like factor 1%2C transcript variant 1	NC_000080.7:79718633-79819931	13709	Elf1	GO:0003700	DNA binding transcription factor activity
TCONS_00000023	NM_001357925.1	0.762234	0.003951	TCONS_00000023	NC_000067.7:11093426-11103295	metadherin%2C transcript variant 2	NC_000081.7:34082864-34143683	67154	Mtdh	GO:0003700	DNA binding transcription factor activity
TCONS_00000023	NM_001357926.1	0.741366	0.00579	TCONS_00000023	NC_000067.7:11093426-11103295	metadherin%2C transcript variant 1	NC_000081.7:34082864-34143683	67154	Mtdh	GO:0003700	DNA binding transcription factor activity
TCONS_00000023	NM_007497.3	0.714125	0.009082	TCONS_00000023	NC_000067.7:11093426-11103295	activating transcription factor 1	NC_000081.7:100125739-100159129	11908	Atf1	GO:0003700	DNA binding transcription factor activity
TCONS_00000023	NM_001081217.1	0.764679	0.003769	TCONS_00000023	NC_000067.7:11093426-11103295	zinc finger protein 174	NC_000082.7:3665086-3676744	385674	Zfp174	GO:0003700	DNA binding transcription factor activity
TCONS_00000023	NM_001025432.1	-0.737853	0.006154	TCONS_00000023	NC_000067.7:11093426-11103295	CREB binding protein	NC_000082.7:3901911-4031268	12914	Crebbp	GO:0000988	transcription factor activity, protein binding
TCONS_00000023	NM_011809.3	0.867238	0.000259	TCONS_00000023	NC_000067.7:11093426-11103295	E26 avian leukemia oncogene 2%2C 3' domain	NC_000082.7:95503273-95522093	23872	Ets2	GO:0003700	DNA binding transcription factor activity
TCONS_00000023	NM_001033496.3	0.761901	0.003976	TCONS_00000023	NC_000067.7:11093426-11103295	zinc finger protein 213	NC_000083.7:23775740-23783200	449521	Zfp213	GO:0003700	DNA binding transcription factor activity
TCONS_00000023	TCONS_00022266	0.916772	2.7e-05	TCONS_00000023	NC_000067.7:11093426-11103295	TCONS_00022266	NC_000083.7:34247248-34257377	20182	Rxrb	GO:0003700	DNA binding transcription factor activity
TCONS_00000023	NM_001205214.1	-0.799289	0.001811	TCONS_00000023	NC_000067.7:11093426-11103295	retinoid X receptor beta%2C transcript variant 1	NC_000083.7:34250785-34257377	20182	Rxrb	GO:0003700	DNA binding transcription factor activity
TCONS_00000023	NM_011306.4	-0.899112	6.9e-05	TCONS_00000023	NC_000067.7:11093426-11103295	retinoid X receptor beta%2C transcript variant 2	NC_000083.7:34250785-34257377	20182	Rxrb	GO:0003700	DNA binding transcription factor activity
TCONS_00000023	NM_017406.4	0.907036	4.7e-05	TCONS_00000023	NC_000067.7:11093426-11103295	activating transcription factor 6 beta	NC_000083.7:34866119-34874048	12915	Atf6b	GO:0003700	DNA binding transcription factor activity
TCONS_00000023	NM_001374803.1	0.796085	0.001949	TCONS_00000023	NC_000067.7:11093426-11103295	nuclear transcription factor-Y alpha%2C transcript variant 5	NC_000083.7:48693912-48716782	18044	Nfya	GO:0003700	DNA binding transcription factor activity
TCONS_00000023	NM_001369357.1	0.729605	0.007076	TCONS_00000023	NC_000067.7:11093426-11103295	TATA-box binding protein associated factor 4b%2C transcript variant 2	NC_000084.7:14916301-15035160	72504	Taf4b	GO:0003700	DNA binding transcription factor activity
TCONS_00000023	NM_001357447.1	0.833133	0.000764	TCONS_00000023	NC_000067.7:11093426-11103295	zinc finger protein 24%2C transcript variant 2	NC_000084.7:24142773-24153427	59057	Zfp24	GO:0003700	DNA binding transcription factor activity
TCONS_00000023	NM_001361211.1	0.703157	0.010741	TCONS_00000023	NC_000067.7:11093426-11103295	nuclear receptor subfamily 3%2C group C%2C member 1%2C transcript variant 4	NC_000084.7:39543597-39622829	14815	Nr3c1	GO:0003700	DNA binding transcription factor activity
TCONS_00000023	XM_036160990.1	-0.824548	0.000967	TCONS_00000023	NC_000067.7:11093426-11103295	nuclear receptor subfamily 3%2C group C%2C member 1%2C transcript variant X11	NC_000084.7:39545017-39623464	14815	Nr3c1	GO:0003700	DNA binding transcription factor activity
TCONS_00000023	NM_007953.2	0.727706	0.007303	TCONS_00000023	NC_000067.7:11093426-11103295	estrogen related receptor%2C alpha	NC_000085.7:6888344-6899176	26379	Esrra	GO:0003700	DNA binding transcription factor activity
TCONS_00000023	XM_036162179.1	0.712324	0.009341	TCONS_00000023	NC_000067.7:11093426-11103295	activating transcription factor 1%2C pseudogene	NC_000086.8:52885449-52886480	100040260	Atf1-ps	GO:0003700	DNA binding transcription factor activity
TCONS_00000023	NM_013476.4	0.720985	0.008147	TCONS_00000023	NC_000067.7:11093426-11103295	androgen receptor	NC_000086.8:97192362-97366824	11835	Ar	GO:0003700	DNA binding transcription factor activity
TCONS_00000023	NM_018789.2	0.878902	0.000167	TCONS_00000023	NC_000067.7:11093426-11103295	forkhead box O4	NC_000086.8:100298133-100304479	54601	Foxo4	GO:0003700	DNA binding transcription factor activity
XR_003947751.1	XM_030252077.2	0.741766	0.00575	RIKEN cDNA C130013N14 gene	NC_000067.7:16366981-16384958	nuclear receptor coactivator 2%2C transcript variant X11	NC_000067.7:13212641-13364673	17978	Ncoa2	GO:0000988	transcription factor activity, protein binding
XR_003947751.1	TCONS_00000136	0.861286	0.000319	RIKEN cDNA C130013N14 gene	NC_000067.7:16366981-16384958	TCONS_00000136	NC_000067.7:52155808-52201024	20846	Stat1	GO:0003700	DNA binding transcription factor activity
XR_003947751.1	NM_009952.2	0.751792	0.004805	RIKEN cDNA C130013N14 gene	NC_000067.7:16366981-16384958	cAMP responsive element binding protein 1%2C transcript variant B	NC_000067.7:64571962-64643707	12912	Creb1	GO:0003700	DNA binding transcription factor activity
XR_003947751.1	XM_006495653.4	0.720167	0.008255	RIKEN cDNA C130013N14 gene	NC_000067.7:16366981-16384958	cAMP responsive element binding protein 1%2C transcript variant X9	NC_000067.7:64572090-64642129	12912	Creb1	GO:0003700	DNA binding transcription factor activity
XR_003947751.1	XM_006497165.5	0.709819	0.009709	RIKEN cDNA C130013N14 gene	NC_000067.7:16366981-16384958	estrogen-related receptor gamma%2C transcript variant X10	NC_000067.7:187340706-187947081	26381	Esrrg	GO:0003700	DNA binding transcription factor activity
XR_003947751.1	NM_178778.3	0.832082	0.000787	RIKEN cDNA C130013N14 gene	NC_000067.7:16366981-16384958	suppressor of cancer cell invasion	NC_000068.8:38956225-39080742	320271	Scai	GO:0000988	transcription factor activity, protein binding
XR_003947751.1	NM_001284371.1	0.830185	0.00083	RIKEN cDNA C130013N14 gene	NC_000067.7:16366981-16384958	activating transcription factor 2%2C transcript variant 6	NC_000068.8:73656690-73722983	11909	Atf2	GO:0003700	DNA binding transcription factor activity
XR_003947751.1	NM_009883.4	-0.725109	0.007621	RIKEN cDNA C130013N14 gene	NC_000067.7:16366981-16384958	CCAAT/enhancer binding protein (C/EBP)%2C beta%2C transcript variant 1	NC_000068.8:167530834-167532352	12608	Cebpb	GO:0003700	DNA binding transcription factor activity
XR_003947751.1	XM_006502031.4	0.800771	0.00175	RIKEN cDNA C130013N14 gene	NC_000067.7:16366981-16384958	E74-like factor 2%2C transcript variant X4	NC_000069.7:51162705-51247925	69257	Elf2	GO:0003700	DNA binding transcription factor activity
XR_003947751.1	XM_017319714.3	0.714542	0.009023	RIKEN cDNA C130013N14 gene	NC_000067.7:16366981-16384958	E74-like factor 2%2C transcript variant X7	NC_000069.7:51162705-51248101	69257	Elf2	GO:0003700	DNA binding transcription factor activity
XR_003947751.1	NM_008687.6	0.72904	0.007143	RIKEN cDNA C130013N14 gene	NC_000067.7:16366981-16384958	nuclear factor I/B%2C transcript variant 3	NC_000070.7:82208409-82424016	18028	Nfib	GO:0003700	DNA binding transcription factor activity
XR_003947751.1	XM_030253752.2	0.713556	0.009163	RIKEN cDNA C130013N14 gene	NC_000067.7:16366981-16384958	arginine glutamic acid dipeptide (RE) repeats%2C transcript variant X16	NC_000070.7:150561931-150706423	68703	Rere	GO:0003700	DNA binding transcription factor activity
XR_003947751.1	NM_212435.1	0.736464	0.006303	RIKEN cDNA C130013N14 gene	NC_000067.7:16366981-16384958	forkhead box P2%2C transcript variant 2	NC_000072.7:15185504-15441976	114142	Foxp2	GO:0003700	DNA binding transcription factor activity
XR_003947751.1	NM_178661.4	0.724254	0.007728	RIKEN cDNA C130013N14 gene	NC_000067.7:16366981-16384958	cAMP responsive element binding protein 3-like 2	NC_000072.7:37307955-37419083	208647	Creb3l2	GO:0003700	DNA binding transcription factor activity
XR_003947751.1	XM_006505322.1	0.73238	0.006755	RIKEN cDNA C130013N14 gene	NC_000067.7:16366981-16384958	forkhead box P1%2C transcript variant X34	NC_000072.7:98902302-99005875	108655	Foxp1	GO:0003700	DNA binding transcription factor activity
XR_003947751.1	XM_006505320.4	0.897027	7.7e-05	RIKEN cDNA C130013N14 gene	NC_000067.7:16366981-16384958	forkhead box P1%2C transcript variant X29	NC_000072.7:98902302-99030079	108655	Foxp1	GO:0003700	DNA binding transcription factor activity
XR_003947751.1	XM_011250460.4	0.761462	0.00401	RIKEN cDNA C130013N14 gene	NC_000067.7:16366981-16384958	avian reticuloendotheliosis viral (v-rel) oncogene related B%2C transcript variant X4	NC_000073.7:19340141-19360634	19698	Relb	GO:0003700	DNA binding transcription factor activity
XR_003947751.1	TCONS_00010634	0.700118	0.011238	RIKEN cDNA C130013N14 gene	NC_000067.7:16366981-16384958	TCONS_00010634	NC_000073.7:45354455-45364631	56632	Sphk2	GO:0003700	DNA binding transcription factor activity
XR_003947751.1	NM_001033161.2	0.752293	0.004761	RIKEN cDNA C130013N14 gene	NC_000067.7:16366981-16384958	TNFRSF1A-associated via death domain	NC_000074.7:105985206-105991226	71609	Tradd	GO:0003700	DNA binding transcription factor activity
XR_003947751.1	TCONS_00011736	0.787201	0.002374	RIKEN cDNA C130013N14 gene	NC_000067.7:16366981-16384958	TCONS_00011736	NC_000074.7:108020101-108106142	54446	Nfat5	GO:0003700	DNA binding transcription factor activity
XR_003947751.1	NM_013519.2	0.775515	0.003037	RIKEN cDNA C130013N14 gene	NC_000067.7:16366981-16384958	forkhead box C2	NC_000074.7:121842909-121845634	14234	Foxc2	GO:0003700	DNA binding transcription factor activity
XR_003947751.1	NM_194263.2	0.792209	0.002127	RIKEN cDNA C130013N14 gene	NC_000067.7:16366981-16384958	T-box 20%2C transcript variant 1	NC_000075.7:24632107-24685599	57246	Tbx20	GO:0003700	DNA binding transcription factor activity
XR_003947751.1	NM_020496.3	0.84106	0.000608	RIKEN cDNA C130013N14 gene	NC_000067.7:16366981-16384958	T-box 20%2C transcript variant 2	NC_000075.7:24651543-24685599	57246	Tbx20	GO:0003700	DNA binding transcription factor activity
XR_003947751.1	NM_001376967.1	0.754961	0.004532	RIKEN cDNA C130013N14 gene	NC_000067.7:16366981-16384958	forkhead box O3%2C transcript variant 1	NC_000076.7:42057840-42152691	56484	Foxo3	GO:0003700	DNA binding transcription factor activity
XR_003947751.1	NM_008688.3	-0.705209	0.010415	RIKEN cDNA C130013N14 gene	NC_000067.7:16366981-16384958	nuclear factor I/C%2C transcript variant 1	NC_000076.7:81232024-81263007	18029	Nfic	GO:0003700	DNA binding transcription factor activity
XR_003947751.1	NM_172941.4	0.725131	0.007618	RIKEN cDNA C130013N14 gene	NC_000067.7:16366981-16384958	zinc finger with KRAB and SCAN domains 17%2C transcript variant 1	NC_000077.7:59376345-59397466	268417	Zkscan17	GO:0003700	DNA binding transcription factor activity
XR_003947751.1	NM_009324.2	0.775125	0.003061	RIKEN cDNA C130013N14 gene	NC_000067.7:16366981-16384958	T-box 2	NC_000077.7:85723440-85732774	21385	Tbx2	GO:0003700	DNA binding transcription factor activity
XR_003947751.1	NM_001313983.1	0.902748	5.8e-05	RIKEN cDNA C130013N14 gene	NC_000067.7:16366981-16384958	thyroid hormone receptor alpha%2C transcript variant 1	NC_000077.7:98632610-98659832	21833	Thra	GO:0003700	DNA binding transcription factor activity
XR_003947751.1	TCONS_00015936	0.875576	0.00019	RIKEN cDNA C130013N14 gene	NC_000067.7:16366981-16384958	TCONS_00015936	NC_000077.7:98632710-98659832	21833	Thra	GO:0003700	DNA binding transcription factor activity
XR_003947751.1	NM_007840.3	0.809918	0.001407	RIKEN cDNA C130013N14 gene	NC_000067.7:16366981-16384958	DEAD box helicase 5	NC_000077.7:106671181-106679320	13207	Ddx5	GO:0000988	transcription factor activity, protein binding
XR_003947751.1	NM_030887.2	-0.780806	0.002721	RIKEN cDNA C130013N14 gene	NC_000067.7:16366981-16384958	Jun dimerization protein 2%2C transcript variant 1	NC_000078.7:85646189-85686652	81703	Jdp2	GO:0003700	DNA binding transcription factor activity
XR_003947751.1	NM_029315.1	0.838237	0.00066	RIKEN cDNA C130013N14 gene	NC_000067.7:16366981-16384958	POU domain class 5%2C transcription factor 2	NC_000079.7:78173020-78174415	75507	Pou5f2	GO:0003700	DNA binding transcription factor activity
XR_003947751.1	NM_023699.3	0.745727	0.005361	RIKEN cDNA C130013N14 gene	NC_000067.7:16366981-16384958	nuclear factor of activated T cells%2C cytoplasmic%2C calcineurin dependent 4%2C transcript variant 1	NC_000080.7:56062251-56071400	73181	Nfatc4	GO:0003700	DNA binding transcription factor activity
XR_003947751.1	TCONS_00019973	0.950227	2e-06	RIKEN cDNA C130013N14 gene	NC_000067.7:16366981-16384958	TCONS_00019973	NC_000080.7:63436369-63506854	14463	Gata4	GO:0003700	DNA binding transcription factor activity
XR_003947751.1	NM_011294.3	0.733101	0.006674	RIKEN cDNA C130013N14 gene	NC_000067.7:16366981-16384958	SUB1 homolog%2C transcriptional regulator	NC_000081.7:11981424-11996093	20024	Sub1	GO:0000988	transcription factor activity, protein binding
XR_003947751.1	NM_001113418.1	0.808666	0.00145	RIKEN cDNA C130013N14 gene	NC_000067.7:16366981-16384958	peroxisome proliferator activated receptor alpha%2C transcript variant 2	NC_000081.7:85619764-85691052	19013	Ppara	GO:0003700	DNA binding transcription factor activity
XR_003947751.1	NM_023794.2	0.781999	0.002654	RIKEN cDNA C130013N14 gene	NC_000067.7:16366981-16384958	ets variant 5%2C transcript variant 2	NC_000082.7:22200062-22258320	104156	Etv5	GO:0003700	DNA binding transcription factor activity
XR_003947751.1	NM_017463.3	0.924724	1.7e-05	RIKEN cDNA C130013N14 gene	NC_000067.7:16366981-16384958	pre B cell leukemia homeobox 2	NC_000083.7:34811232-34816374	18515	Pbx2	GO:0003700	DNA binding transcription factor activity
XR_003947751.1	NM_010258.3	0.784828	0.002499	RIKEN cDNA C130013N14 gene	NC_000067.7:16366981-16384958	GATA binding protein 6	NC_000084.7:11052509-11085635	14465	Gata6	GO:0003700	DNA binding transcription factor activity
XR_003947751.1	XM_017318209.3	0.834313	0.000739	RIKEN cDNA C130013N14 gene	NC_000067.7:16366981-16384958	estrogen related receptor%2C alpha%2C transcript variant X3	NC_000085.7:6888344-6899182	26379	Esrra	GO:0003700	DNA binding transcription factor activity
XR_004935838.1	XM_036163812.1	0.893384	9e-05	uncharacterized LOC118567721%2C transcript variant X1	NC_000067.7:23295354-23333151	nuclear factor I/B%2C transcript variant X3	NC_000070.7:82208409-82422947	18028	Nfib	GO:0003700	DNA binding transcription factor activity
XR_004935838.1	XM_006537654.3	-0.741956	0.005731	uncharacterized LOC118567721%2C transcript variant X1	NC_000067.7:23295354-23333151	nuclear factor I/B%2C transcript variant X2	NC_000070.7:82208409-82424988	18028	Nfib	GO:0003700	DNA binding transcription factor activity
XR_004935838.1	XM_030253748.2	0.711699	0.009431	uncharacterized LOC118567721%2C transcript variant X1	NC_000067.7:23295354-23333151	arginine glutamic acid dipeptide (RE) repeats%2C transcript variant X10	NC_000070.7:150365371-150706423	68703	Rere	GO:0003700	DNA binding transcription factor activity
XR_004935838.1	XM_036164921.1	-0.730693	0.006949	uncharacterized LOC118567721%2C transcript variant X1	NC_000067.7:23295354-23333151	recombination signal binding protein for immunoglobulin kappa J region%2C transcript variant X4	NC_000071.7:53759203-53814703	19664	Rbpj	GO:0003700	DNA binding transcription factor activity
XR_004935838.1	XM_006540596.4	0.761291	0.004023	uncharacterized LOC118567721%2C transcript variant X1	NC_000067.7:23295354-23333151	D site albumin promoter binding protein%2C transcript variant X1	NC_000073.7:45354517-45359579	13170	Dbp	GO:0003700	DNA binding transcription factor activity
XR_004935838.1	TCONS_00013922	-0.701722	0.010973	uncharacterized LOC118567721%2C transcript variant X1	NC_000067.7:23295354-23333151	TCONS_00013922	NC_000075.7:122677987-122695059	235682	Zfp445	GO:0003700	DNA binding transcription factor activity
XR_004935838.1	NM_001355677.1	0.750765	0.004896	uncharacterized LOC118567721%2C transcript variant X1	NC_000067.7:23295354-23333151	DEAD box helicase 5%2C transcript variant 3	NC_000077.7:106671180-106680011	13207	Ddx5	GO:0000988	transcription factor activity, protein binding
XR_004935838.1	XM_006516234.3	-0.762027	0.003966	uncharacterized LOC118567721%2C transcript variant X1	NC_000067.7:23295354-23333151	forkhead box N3%2C transcript variant X5	NC_000078.7:99156339-99359270	71375	Foxn3	GO:0003700	DNA binding transcription factor activity
XR_004935838.1	NM_008092.4	-0.702045	0.010921	uncharacterized LOC118567721%2C transcript variant X1	NC_000067.7:23295354-23333151	GATA binding protein 4%2C transcript variant 2	NC_000080.7:63436362-63482720	14463	Gata4	GO:0003700	DNA binding transcription factor activity
XR_004935838.1	XM_006520609.4	0.834943	0.000726	uncharacterized LOC118567721%2C transcript variant X1	NC_000067.7:23295354-23333151	POU domain%2C class 6%2C transcription factor 1%2C transcript variant X3	NC_000081.7:100473198-100497936	19009	Pou6f1	GO:0003700	DNA binding transcription factor activity
XR_004935839.1	XM_030252077.2	0.715063	0.00895	uncharacterized LOC118567721%2C transcript variant X2	NC_000067.7:23295407-23333151	nuclear receptor coactivator 2%2C transcript variant X11	NC_000067.7:13212641-13364673	17978	Ncoa2	GO:0000988	transcription factor activity, protein binding
XR_004935839.1	XM_017319360.3	0.735465	0.006411	uncharacterized LOC118567721%2C transcript variant X2	NC_000067.7:23295407-23333151	POU domain%2C class 2%2C transcription factor 1%2C transcript variant X5	NC_000067.7:165692718-165802814	18986	Pou2f1	GO:0003700	DNA binding transcription factor activity
XR_004935839.1	NM_001159731.1	0.736627	0.006285	uncharacterized LOC118567721%2C transcript variant X2	NC_000067.7:23295407-23333151	retinoid X receptor gamma%2C transcript variant 2	NC_000067.7:167445833-167467192	20183	Rxrg	GO:0003700	DNA binding transcription factor activity
XR_004935839.1	NM_183355.3	0.784149	0.002535	uncharacterized LOC118567721%2C transcript variant X2	NC_000067.7:23295407-23333151	pre B cell leukemia homeobox 1%2C transcript variant a	NC_000067.7:167981095-168259738	18514	Pbx1	GO:0003700	DNA binding transcription factor activity
XR_004935839.1	NM_011305.3	0.823781	0.000987	uncharacterized LOC118567721%2C transcript variant X2	NC_000067.7:23295407-23333151	retinoid X receptor alpha%2C transcript variant 1	NC_000068.8:27567212-27653331	20181	Rxra	GO:0003700	DNA binding transcription factor activity
XR_004935839.1	NM_178778.3	0.741704	0.005756	uncharacterized LOC118567721%2C transcript variant X2	NC_000067.7:23295407-23333151	suppressor of cancer cell invasion	NC_000068.8:38956225-39080742	320271	Scai	GO:0000988	transcription factor activity, protein binding
XR_004935839.1	NM_020255.3	-0.74982	0.004981	uncharacterized LOC118567721%2C transcript variant X2	NC_000067.7:23295407-23333151	SCAN domain-containing 1	NC_000068.8:156153765-156154624	19018	Scand1	GO:0003700	DNA binding transcription factor activity
XR_004935839.1	NM_023214.7	0.800616	0.001757	uncharacterized LOC118567721%2C transcript variant X2	NC_000067.7:23295407-23333151	solute carrier family 30 (zinc transporter)%2C member 7	NC_000069.7:115732621-115801055	66500	Slc30a7	GO:0003700	DNA binding transcription factor activity
XR_004935839.1	XM_036163227.1	0.728046	0.007262	uncharacterized LOC118567721%2C transcript variant X2	NC_000067.7:23295407-23333151	solute carrier family 30 (zinc transporter)%2C member 7%2C transcript variant X1	NC_000069.7:115765490-115801079	66500	Slc30a7	GO:0003700	DNA binding transcription factor activity
XR_004935839.1	NM_013497.4	0.744804	0.00545	uncharacterized LOC118567721%2C transcript variant X2	NC_000067.7:23295407-23333151	cAMP responsive element binding protein 3	NC_000070.7:43562657-43567061	12913	Creb3	GO:0003700	DNA binding transcription factor activity
XR_004935839.1	XM_036163812.1	-0.712551	0.009308	uncharacterized LOC118567721%2C transcript variant X2	NC_000067.7:23295407-23333151	nuclear factor I/B%2C transcript variant X3	NC_000070.7:82208409-82422947	18028	Nfib	GO:0003700	DNA binding transcription factor activity
XR_004935839.1	XM_006537654.3	0.821144	0.001059	uncharacterized LOC118567721%2C transcript variant X2	NC_000067.7:23295407-23333151	nuclear factor I/B%2C transcript variant X2	NC_000070.7:82208409-82424988	18028	Nfib	GO:0003700	DNA binding transcription factor activity
XR_004935839.1	NM_029868.3	0.781759	0.002667	uncharacterized LOC118567721%2C transcript variant X2	NC_000067.7:23295407-23333151	GC-rich promoter binding protein 1-like 1%2C transcript variant 1	NC_000070.7:116414854-116451099	77110	Gpbp1l1	GO:0003700	DNA binding transcription factor activity
XR_004935839.1	NM_001290696.1	0.751697	0.004813	uncharacterized LOC118567721%2C transcript variant X2	NC_000067.7:23295407-23333151	forkhead box J3%2C transcript variant 2	NC_000070.7:119396857-119486316	230700	Foxj3	GO:0003700	DNA binding transcription factor activity
XR_004935839.1	NM_016683.2	0.75779	0.004299	uncharacterized LOC118567721%2C transcript variant X2	NC_000067.7:23295407-23333151	zinc finger with KRAB and SCAN domains 5%2C transcript variant 1	NC_000071.7:145141368-145158560	22757	Zkscan5	GO:0003700	DNA binding transcription factor activity
XR_004935839.1	TCONS_00009475	0.767909	0.003538	uncharacterized LOC118567721%2C transcript variant X2	NC_000067.7:23295407-23333151	TCONS_00009475	NC_000073.7:12531329-12532991	232875	Zscan18	GO:0003700	DNA binding transcription factor activity
XR_004935839.1	TCONS_00010406	0.705351	0.010392	uncharacterized LOC118567721%2C transcript variant X2	NC_000067.7:23295407-23333151	TCONS_00010406	NC_000073.7:19339987-19354009	19698	Relb	GO:0003700	DNA binding transcription factor activity
XR_004935839.1	TCONS_00010553	0.788754	0.002295	uncharacterized LOC118567721%2C transcript variant X2	NC_000067.7:23295407-23333151	TCONS_00010553	NC_000073.7:34611846-34755991	12611	Cebpg	GO:0003700	DNA binding transcription factor activity
XR_004935839.1	NM_145151.3	0.776811	0.002957	uncharacterized LOC118567721%2C transcript variant X2	NC_000067.7:23295407-23333151	CREB/ATF bZIP transcription factor%2C transcript variant 1	NC_000073.7:90091988-90097251	233490	Crebzf	GO:0003700	DNA binding transcription factor activity
XR_004935839.1	XM_011242265.3	0.701796	0.010961	uncharacterized LOC118567721%2C transcript variant X2	NC_000067.7:23295407-23333151	nuclear receptor subfamily 2%2C group F%2C member 6%2C transcript variant X4	NC_000074.7:71826761-71831012	13864	Nr2f6	GO:0003700	DNA binding transcription factor activity
XR_004935839.1	NM_010150.2	0.740357	0.005893	uncharacterized LOC118567721%2C transcript variant X2	NC_000067.7:23295407-23333151	nuclear receptor subfamily 2%2C group F%2C member 6	NC_000074.7:71826762-71834596	13864	Nr2f6	GO:0003700	DNA binding transcription factor activity
XR_004935839.1	NM_008320.4	-0.720342	0.008231	uncharacterized LOC118567721%2C transcript variant X2	NC_000067.7:23295407-23333151	interferon regulatory factor 8%2C transcript variant 2	NC_000074.7:121463096-121483433	15900	Irf8	GO:0003700	DNA binding transcription factor activity
XR_004935839.1	NM_001301811.1	0.750222	0.004945	uncharacterized LOC118567721%2C transcript variant X2	NC_000067.7:23295407-23333151	interferon regulatory factor 8%2C transcript variant 1	NC_000074.7:121465377-121483433	15900	Irf8	GO:0003700	DNA binding transcription factor activity
XR_004935839.1	TCONS_00012478	0.792515	0.002112	uncharacterized LOC118567721%2C transcript variant X2	NC_000067.7:23295407-23333151	TCONS_00012478	NC_000074.7:123351876-123404914	12398	Cbfa2t3	GO:0003700	DNA binding transcription factor activity
XR_004935839.1	NM_001372534.1	0.702766	0.010804	uncharacterized LOC118567721%2C transcript variant X2	NC_000067.7:23295407-23333151	E26 avian leukemia oncogene 1%2C 5' domain%2C transcript variant 3	NC_000075.7:32547536-32669116	23871	Ets1	GO:0003700	DNA binding transcription factor activity
XR_004935839.1	NM_183316.2	-0.785374	0.00247	uncharacterized LOC118567721%2C transcript variant X2	NC_000067.7:23295407-23333151	small nuclear RNA activating complex%2C polypeptide 5	NC_000075.7:64086578-64089970	330959	Snapc5	GO:0003700	DNA binding transcription factor activity
XR_004935839.1	NM_023814.4	0.840106	0.000625	uncharacterized LOC118567721%2C transcript variant X2	NC_000067.7:23295407-23333151	T-box18	NC_000075.7:87584852-87613313	76365	Tbx18	GO:0003700	DNA binding transcription factor activity
XR_004935839.1	NM_009284.2	0.705776	0.010326	uncharacterized LOC118567721%2C transcript variant X2	NC_000067.7:23295407-23333151	signal transducer and activator of transcription 6	NC_000076.7:127478854-127496856	20852	Stat6	GO:0003700	DNA binding transcription factor activity
XR_004935839.1	TCONS_00017083	0.716009	0.008818	uncharacterized LOC118567721%2C transcript variant X2	NC_000067.7:23295407-23333151	TCONS_00017083	NC_000077.7:106673520-106679733	13207	Ddx5	GO:0000988	transcription factor activity, protein binding
XR_004935839.1	NM_033270.2	0.758957	0.004205	uncharacterized LOC118567721%2C transcript variant X2	NC_000067.7:23295407-23333151	E2F transcription factor 6%2C transcript variant 1	NC_000078.7:16860965-16876753	50496	E2f6	GO:0003700	DNA binding transcription factor activity
XR_004935839.1	NM_011243.2	0.74731	0.005212	uncharacterized LOC118567721%2C transcript variant X2	NC_000067.7:23295407-23333151	retinoic acid receptor%2C beta%2C transcript variant beta2	NC_000080.7:5894286-6038924	218772	Rarb	GO:0003700	DNA binding transcription factor activity
XR_004935839.1	TCONS_00020421	0.710564	0.009598	uncharacterized LOC118567721%2C transcript variant X2	NC_000067.7:23295407-23333151	TCONS_00020421	NC_000081.7:81686915-81711064	21685	Tef	GO:0003700	DNA binding transcription factor activity
XR_004935839.1	XM_011245517.4	-0.773819	0.003143	uncharacterized LOC118567721%2C transcript variant X2	NC_000067.7:23295407-23333151	peroxisome proliferator activated receptor alpha%2C transcript variant X3	NC_000081.7:85619111-85691052	19013	Ppara	GO:0003700	DNA binding transcription factor activity
XR_004935839.1	NM_007497.3	0.750523	0.004918	uncharacterized LOC118567721%2C transcript variant X2	NC_000067.7:23295407-23333151	activating transcription factor 1	NC_000081.7:100125739-100159129	11908	Atf1	GO:0003700	DNA binding transcription factor activity
XR_004935839.1	XM_006520351.5	0.725769	0.007539	uncharacterized LOC118567721%2C transcript variant X2	NC_000067.7:23295407-23333151	activating transcription factor 1%2C transcript variant X1	NC_000081.7:100126109-100159129	11908	Atf1	GO:0003700	DNA binding transcription factor activity
XR_004935839.1	XM_006522653.4	0.735192	0.006441	uncharacterized LOC118567721%2C transcript variant X2	NC_000067.7:23295407-23333151	zinc finger protein 263%2C transcript variant X1	NC_000082.7:3561882-3568654	74120	Zfp263	GO:0003700	DNA binding transcription factor activity
XR_004935839.1	NM_001025432.1	-0.79612	0.001948	uncharacterized LOC118567721%2C transcript variant X2	NC_000067.7:23295407-23333151	CREB binding protein	NC_000082.7:3901911-4031268	12914	Crebbp	GO:0000988	transcription factor activity, protein binding
XR_004935839.1	NM_011809.3	0.739255	0.006007	uncharacterized LOC118567721%2C transcript variant X2	NC_000067.7:23295407-23333151	E26 avian leukemia oncogene 2%2C 3' domain	NC_000082.7:95503273-95522093	23872	Ets2	GO:0003700	DNA binding transcription factor activity
XR_004935839.1	TCONS_00022266	0.7073	0.01009	uncharacterized LOC118567721%2C transcript variant X2	NC_000067.7:23295407-23333151	TCONS_00022266	NC_000083.7:34247248-34257377	20182	Rxrb	GO:0003700	DNA binding transcription factor activity
XR_004935839.1	NM_001205214.1	-0.829022	0.000857	uncharacterized LOC118567721%2C transcript variant X2	NC_000067.7:23295407-23333151	retinoid X receptor beta%2C transcript variant 1	NC_000083.7:34250785-34257377	20182	Rxrb	GO:0003700	DNA binding transcription factor activity
XR_004935839.1	NM_001357447.1	0.738224	0.006115	uncharacterized LOC118567721%2C transcript variant X2	NC_000067.7:23295407-23333151	zinc finger protein 24%2C transcript variant 2	NC_000084.7:24142773-24153427	59057	Zfp24	GO:0003700	DNA binding transcription factor activity
XR_004935839.1	NM_001357448.1	0.747034	0.005237	uncharacterized LOC118567721%2C transcript variant X2	NC_000067.7:23295407-23333151	zinc finger protein 24%2C transcript variant 3	NC_000084.7:24142773-24153427	59057	Zfp24	GO:0003700	DNA binding transcription factor activity
XR_004935839.1	NM_021559.3	-0.722189	0.007991	uncharacterized LOC118567721%2C transcript variant X2	NC_000067.7:23295407-23333151	zinc finger protein 24%2C transcript variant 1	NC_000084.7:24142773-24153870	59057	Zfp24	GO:0003700	DNA binding transcription factor activity
XR_004935839.1	NM_001164110.1	0.724967	0.007638	uncharacterized LOC118567721%2C transcript variant X2	NC_000067.7:23295407-23333151	nuclear factor of activated T cells%2C cytoplasmic%2C calcineurin dependent 1%2C transcript variant 4	NC_000084.7:80649419-80756286	18018	Nfatc1	GO:0003700	DNA binding transcription factor activity
XR_004935839.1	NM_007953.2	0.705366	0.01039	uncharacterized LOC118567721%2C transcript variant X2	NC_000067.7:23295407-23333151	estrogen related receptor%2C alpha	NC_000085.7:6888344-6899176	26379	Esrra	GO:0003700	DNA binding transcription factor activity
XR_004935839.1	XM_006526929.5	-0.72606	0.007503	uncharacterized LOC118567721%2C transcript variant X2	NC_000067.7:23295407-23333151	myelin regulatory factor%2C transcript variant X4	NC_000085.7:10185634-10218133	225908	Myrf	GO:0003700	DNA binding transcription factor activity
XR_004935839.1	NM_018789.2	0.788148	0.002326	uncharacterized LOC118567721%2C transcript variant X2	NC_000067.7:23295407-23333151	forkhead box O4	NC_000086.8:100298133-100304479	54601	Foxo4	GO:0003700	DNA binding transcription factor activity
XR_004935993.1	XM_006497782.3	-0.708398	0.009922	uncharacterized LOC118567733	NC_000067.7:34465098-34473990	pre B cell leukemia homeobox 3%2C transcript variant X1	NC_000068.8:34061468-34261699	18516	Pbx3	GO:0003700	DNA binding transcription factor activity
XR_004935993.1	NM_013720.2	-0.806501	0.001528	uncharacterized LOC118567733	NC_000067.7:34465098-34473990	MAX gene associated%2C transcript variant 1	NC_000068.8:119727708-119800062	29808	Mga	GO:0003700	DNA binding transcription factor activity
XR_004935993.1	NM_009883.4	-0.780703	0.002727	uncharacterized LOC118567733	NC_000067.7:34465098-34473990	CCAAT/enhancer binding protein (C/EBP)%2C beta%2C transcript variant 1	NC_000068.8:167530834-167532352	12608	Cebpb	GO:0003700	DNA binding transcription factor activity
XR_004935993.1	XM_036163055.1	-0.79423	0.002033	uncharacterized LOC118567733	NC_000067.7:34465098-34473990	GATA zinc finger domain containing 2B%2C transcript variant X3	NC_000069.7:90225295-90269530	229542	Gatad2b	GO:0003700	DNA binding transcription factor activity
XR_004935993.1	NM_009822.3	0.701241	0.011052	uncharacterized LOC118567733	NC_000067.7:34465098-34473990	RUNX1 translocation partner 1%2C transcript variant 3	NC_000070.7:13784781-13895056	12395	Runx1t1	GO:0003700	DNA binding transcription factor activity
XR_004935993.1	XM_006505322.1	0.817391	0.001167	uncharacterized LOC118567733	NC_000067.7:34465098-34473990	forkhead box P1%2C transcript variant X34	NC_000072.7:98902302-99005875	108655	Foxp1	GO:0003700	DNA binding transcription factor activity
XR_004935993.1	XM_011241207.4	-0.703578	0.010673	uncharacterized LOC118567733	NC_000067.7:34465098-34473990	ets variant 6%2C transcript variant X2	NC_000072.7:134013039-134247058	14011	Etv6	GO:0003700	DNA binding transcription factor activity
XR_004935993.1	NM_001033333.3	-0.739838	0.005947	uncharacterized LOC118567733	NC_000067.7:34465098-34473990	myelin regulatory factor-like	NC_000076.7:116612449-116732784	237558	Myrfl	GO:0003700	DNA binding transcription factor activity
XR_004935993.1	NM_001313983.1	0.728638	0.007191	uncharacterized LOC118567733	NC_000067.7:34465098-34473990	thyroid hormone receptor alpha%2C transcript variant 1	NC_000077.7:98632610-98659832	21833	Thra	GO:0003700	DNA binding transcription factor activity
XR_004935993.1	NM_008709.3	-0.721395	0.008094	uncharacterized LOC118567733	NC_000067.7:34465098-34473990	v-myc avian myelocytomatosis viral related oncogene%2C neuroblastoma derived	NC_000078.7:12986093-12991837	18109	Mycn	GO:0003700	DNA binding transcription factor activity
XR_004935993.1	XM_011245516.4	-0.715794	0.008848	uncharacterized LOC118567733	NC_000067.7:34465098-34473990	peroxisome proliferator activated receptor alpha%2C transcript variant X1	NC_000081.7:85619622-85691052	19013	Ppara	GO:0003700	DNA binding transcription factor activity
XR_004935993.1	NM_010754.5	-0.790017	0.002233	uncharacterized LOC118567733	NC_000067.7:34465098-34473990	SMAD family member 2%2C transcript variant 1	NC_000084.7:76374771-76444818	17126	Smad2	GO:0003700	DNA binding transcription factor activity
XR_004935993.1	XM_006528500.4	-0.797084	0.001906	uncharacterized LOC118567733	NC_000067.7:34465098-34473990	TSC22 domain family%2C member 3%2C transcript variant X1	NC_000086.8:139440276-139499970	14605	Tsc22d3	GO:0003700	DNA binding transcription factor activity
XR_001778883.3	NM_001205314.1	0.900572	6.5e-05	predicted gene%2C 39627	NC_000067.7:37538117-37539022	signal transducer and activator of transcription 1%2C transcript variant 3	NC_000067.7:52158596-52201024	20846	Stat1	GO:0003700	DNA binding transcription factor activity
XR_001778883.3	NM_001357627.1	0.711777	0.00942	predicted gene%2C 39627	NC_000067.7:37538117-37539022	signal transducer and activator of transcription 1%2C transcript variant 4	NC_000067.7:52158596-52201024	20846	Stat1	GO:0003700	DNA binding transcription factor activity
XR_001778883.3	XM_036164921.1	0.706404	0.010228	predicted gene%2C 39627	NC_000067.7:37538117-37539022	recombination signal binding protein for immunoglobulin kappa J region%2C transcript variant X4	NC_000071.7:53759203-53814703	19664	Rbpj	GO:0003700	DNA binding transcription factor activity
XR_001778883.3	NM_001303102.1	0.73301	0.006684	predicted gene%2C 39627	NC_000067.7:37538117-37539022	ets variant 6%2C transcript variant 2	NC_000072.7:134012662-134247121	14011	Etv6	GO:0003700	DNA binding transcription factor activity
XR_001778883.3	NM_010546.2	0.802888	0.001665	predicted gene%2C 39627	NC_000067.7:37538117-37539022	inhibitor of kappaB kinase beta%2C transcript variant 2	NC_000074.7:23149220-23196599	16150	Ikbkb	GO:0003700	DNA binding transcription factor activity
XR_001778883.3	NM_008539.4	0.784552	0.002514	predicted gene%2C 39627	NC_000067.7:37538117-37539022	SMAD family member 1	NC_000074.7:80065023-80126057	17125	Smad1	GO:0003700	DNA binding transcription factor activity
XR_001778883.3	NM_001371061.1	0.759896	0.004131	predicted gene%2C 39627	NC_000067.7:37538117-37539022	nuclear factor I/X%2C transcript variant 14	NC_000074.7:85431340-85500039	18032	Nfix	GO:0003700	DNA binding transcription factor activity
XR_001778883.3	NM_001372534.1	0.719371	0.00836	predicted gene%2C 39627	NC_000067.7:37538117-37539022	E26 avian leukemia oncogene 1%2C 5' domain%2C transcript variant 3	NC_000075.7:32547536-32669116	23871	Ets1	GO:0003700	DNA binding transcription factor activity
XR_001778883.3	XM_006532721.3	0.743556	0.005572	predicted gene%2C 39627	NC_000067.7:37538117-37539022	signal transducer and activator of transcription 5A%2C transcript variant X1	NC_000077.7:100751028-100775995	20850	Stat5a	GO:0003700	DNA binding transcription factor activity
XR_001778883.3	XM_036158194.1	0.791106	0.00218	predicted gene%2C 39627	NC_000067.7:37538117-37539022	GC-rich promoter binding protein 1%2C transcript variant X5	NC_000079.7:111562213-111584095	73274	Gpbp1	GO:0003700	DNA binding transcription factor activity
XR_001778883.3	NM_008394.3	0.7718	0.003274	predicted gene%2C 39627	NC_000067.7:37538117-37539022	interferon regulatory factor 9%2C transcript variant 3	NC_000080.7:55841441-55847487	16391	Irf9	GO:0003700	DNA binding transcription factor activity
XR_001778883.3	XM_006520476.5	0.719681	0.008319	predicted gene%2C 39627	NC_000067.7:37538117-37539022	heat shock factor 1%2C transcript variant X7	NC_000081.7:76361654-76385178	15499	Hsf1	GO:0003700	DNA binding transcription factor activity
XR_001778883.3	NM_001361211.1	0.702978	0.01077	predicted gene%2C 39627	NC_000067.7:37538117-37539022	nuclear receptor subfamily 3%2C group C%2C member 1%2C transcript variant 4	NC_000084.7:39543597-39622829	14815	Nr3c1	GO:0003700	DNA binding transcription factor activity
XR_001778883.3	NM_001361209.1	0.724476	0.0077	predicted gene%2C 39627	NC_000067.7:37538117-37539022	nuclear receptor subfamily 3%2C group C%2C member 1%2C transcript variant 2	NC_000084.7:39543597-39623723	14815	Nr3c1	GO:0003700	DNA binding transcription factor activity
XR_001778883.3	XM_006525665.5	0.703495	0.010687	predicted gene%2C 39627	NC_000067.7:37538117-37539022	nuclear receptor subfamily 3%2C group C%2C member 1%2C transcript variant X4	NC_000084.7:39545027-39622582	14815	Nr3c1	GO:0003700	DNA binding transcription factor activity
XR_001778883.3	XM_006525701.4	0.701499	0.01101	predicted gene%2C 39627	NC_000067.7:37538117-37539022	SMAD family member 4%2C transcript variant X2	NC_000084.7:73769250-73836640	17128	Smad4	GO:0003700	DNA binding transcription factor activity
XR_373390.3	XM_006502031.4	-0.751743	0.004809	predicted gene%2C 30900	NC_000067.7:45865310-45869057	E74-like factor 2%2C transcript variant X4	NC_000069.7:51162705-51247925	69257	Elf2	GO:0003700	DNA binding transcription factor activity
XR_373390.3	NM_001004176.2	-0.710212	0.00965	predicted gene%2C 30900	NC_000067.7:45865310-45869057	mastermind like transcriptional coactivator 3	NC_000069.7:51595031-52012427	433586	Maml3	GO:0000988	transcription factor activity, protein binding
XR_373390.3	NM_009822.3	-0.746044	0.005331	predicted gene%2C 30900	NC_000067.7:45865310-45869057	RUNX1 translocation partner 1%2C transcript variant 3	NC_000070.7:13784781-13895056	12395	Runx1t1	GO:0003700	DNA binding transcription factor activity
XR_373390.3	NM_011535.3	-0.702006	0.010927	predicted gene%2C 30900	NC_000067.7:45865310-45869057	T-box 3%2C transcript variant 1	NC_000071.7:119809297-119822789	21386	Tbx3	GO:0003700	DNA binding transcription factor activity
XR_373390.3	NM_212435.1	-0.740791	0.005849	predicted gene%2C 30900	NC_000067.7:45865310-45869057	forkhead box P2%2C transcript variant 2	NC_000072.7:15185504-15441976	114142	Foxp2	GO:0003700	DNA binding transcription factor activity
XR_373390.3	NM_178661.4	-0.707227	0.010101	predicted gene%2C 30900	NC_000067.7:45865310-45869057	cAMP responsive element binding protein 3-like 2	NC_000072.7:37307955-37419083	208647	Creb3l2	GO:0003700	DNA binding transcription factor activity
XR_373390.3	XM_006505322.1	-0.746325	0.005304	predicted gene%2C 30900	NC_000067.7:45865310-45869057	forkhead box P1%2C transcript variant X34	NC_000072.7:98902302-99005875	108655	Foxp1	GO:0003700	DNA binding transcription factor activity
XR_373390.3	NM_053202.2	-0.732542	0.006737	predicted gene%2C 30900	NC_000067.7:45865310-45869057	forkhead box P1%2C transcript variant 1	NC_000072.7:98902302-99412306	108655	Foxp1	GO:0003700	DNA binding transcription factor activity
XR_373390.3	NM_177687.3	-0.708541	0.009901	predicted gene%2C 30900	NC_000067.7:45865310-45869057	cAMP responsive element binding protein-like 2	NC_000072.7:134807161-134834846	232430	Crebl2	GO:0003700	DNA binding transcription factor activity
XR_373390.3	NM_013519.2	-0.775863	0.003015	predicted gene%2C 30900	NC_000067.7:45865310-45869057	forkhead box C2	NC_000074.7:121842909-121845634	14234	Foxc2	GO:0003700	DNA binding transcription factor activity
XR_373390.3	NM_001376967.1	-0.739521	0.005979	predicted gene%2C 30900	NC_000067.7:45865310-45869057	forkhead box O3%2C transcript variant 1	NC_000076.7:42057840-42152691	56484	Foxo3	GO:0003700	DNA binding transcription factor activity
XR_373390.3	NM_008688.3	0.743713	0.005556	predicted gene%2C 30900	NC_000067.7:45865310-45869057	nuclear factor I/C%2C transcript variant 1	NC_000076.7:81232024-81263007	18029	Nfic	GO:0003700	DNA binding transcription factor activity
XR_373390.3	NM_009324.2	-0.703825	0.010634	predicted gene%2C 30900	NC_000067.7:45865310-45869057	T-box 2	NC_000077.7:85723440-85732774	21385	Tbx2	GO:0003700	DNA binding transcription factor activity
XR_373390.3	NM_001313983.1	-0.736043	0.006348	predicted gene%2C 30900	NC_000067.7:45865310-45869057	thyroid hormone receptor alpha%2C transcript variant 1	NC_000077.7:98632610-98659832	21833	Thra	GO:0003700	DNA binding transcription factor activity
XR_373390.3	TCONS_00015936	-0.721124	0.008129	predicted gene%2C 30900	NC_000067.7:45865310-45869057	TCONS_00015936	NC_000077.7:98632710-98659832	21833	Thra	GO:0003700	DNA binding transcription factor activity
XR_373390.3	NM_023699.3	-0.724365	0.007714	predicted gene%2C 30900	NC_000067.7:45865310-45869057	nuclear factor of activated T cells%2C cytoplasmic%2C calcineurin dependent 4%2C transcript variant 1	NC_000080.7:56062251-56071400	73181	Nfatc4	GO:0003700	DNA binding transcription factor activity
XR_373390.3	NM_001113418.1	-0.713335	0.009195	predicted gene%2C 30900	NC_000067.7:45865310-45869057	peroxisome proliferator activated receptor alpha%2C transcript variant 2	NC_000081.7:85619764-85691052	19013	Ppara	GO:0003700	DNA binding transcription factor activity
XR_373390.3	NM_017463.3	-0.711244	0.009498	predicted gene%2C 30900	NC_000067.7:45865310-45869057	pre B cell leukemia homeobox 2	NC_000083.7:34811232-34816374	18515	Pbx2	GO:0003700	DNA binding transcription factor activity
XR_373390.3	NM_010258.3	-0.819184	0.001114	predicted gene%2C 30900	NC_000067.7:45865310-45869057	GATA binding protein 6	NC_000084.7:11052509-11085635	14465	Gata6	GO:0003700	DNA binding transcription factor activity
XR_373390.3	XM_006525660.4	0.845662	0.000529	predicted gene%2C 30900	NC_000067.7:45865310-45869057	nuclear receptor subfamily 3%2C group C%2C member 1%2C transcript variant X3	NC_000084.7:39545027-39622485	14815	Nr3c1	GO:0003700	DNA binding transcription factor activity
XR_373390.3	XM_006525663.5	-0.704237	0.010568	predicted gene%2C 30900	NC_000067.7:45865310-45869057	nuclear receptor subfamily 3%2C group C%2C member 1%2C transcript variant X6	NC_000084.7:39545027-39623538	14815	Nr3c1	GO:0003700	DNA binding transcription factor activity
XR_373390.3	NM_001164112.1	0.748322	0.005118	predicted gene%2C 30900	NC_000067.7:45865310-45869057	nuclear factor of activated T cells%2C cytoplasmic%2C calcineurin dependent 1%2C transcript variant 5	NC_000084.7:80649419-80751388	18018	Nfatc1	GO:0003700	DNA binding transcription factor activity
TCONS_00000170	NM_001205314.1	0.791257	0.002172	TCONS_00000170	NC_000067.7:58752444-58763708	signal transducer and activator of transcription 1%2C transcript variant 3	NC_000067.7:52158596-52201024	20846	Stat1	GO:0003700	DNA binding transcription factor activity
TCONS_00000170	NM_001357627.1	0.840145	0.000624	TCONS_00000170	NC_000067.7:58752444-58763708	signal transducer and activator of transcription 1%2C transcript variant 4	NC_000067.7:52158596-52201024	20846	Stat1	GO:0003700	DNA binding transcription factor activity
TCONS_00000170	NM_198932.3	-0.760653	0.004072	TCONS_00000170	NC_000067.7:58752444-58763708	POU domain%2C class 2%2C transcription factor 1%2C transcript variant 2	NC_000067.7:165692722-165830203	18986	Pou2f1	GO:0003700	DNA binding transcription factor activity
TCONS_00000170	NM_001159731.1	0.829438	0.000847	TCONS_00000170	NC_000067.7:58752444-58763708	retinoid X receptor gamma%2C transcript variant 2	NC_000067.7:167445833-167467192	20183	Rxrg	GO:0003700	DNA binding transcription factor activity
TCONS_00000170	TCONS_00001431	0.712143	0.009367	TCONS_00000170	NC_000067.7:58752444-58763708	TCONS_00001431	NC_000067.7:167947715-168259738	18514	Pbx1	GO:0003700	DNA binding transcription factor activity
TCONS_00000170	NM_001291508.1	0.715997	0.008819	TCONS_00000170	NC_000067.7:58752444-58763708	pre B cell leukemia homeobox 1%2C transcript variant c	NC_000067.7:167981095-168259738	18514	Pbx1	GO:0003700	DNA binding transcription factor activity
TCONS_00000170	XM_011238796.4	0.705626	0.010349	TCONS_00000170	NC_000067.7:58752444-58763708	activating transcription factor 6%2C transcript variant X2	NC_000067.7:170532244-170696154	226641	Atf6	GO:0003700	DNA binding transcription factor activity
TCONS_00000170	XM_030253420.2	0.700116	0.011238	TCONS_00000170	NC_000067.7:58752444-58763708	activating transcription factor 6%2C transcript variant X1	NC_000067.7:170532244-170696414	226641	Atf6	GO:0003700	DNA binding transcription factor activity
TCONS_00000170	NM_011305.3	0.705659	0.010344	TCONS_00000170	NC_000067.7:58752444-58763708	retinoid X receptor alpha%2C transcript variant 1	NC_000068.8:27567212-27653331	20181	Rxra	GO:0003700	DNA binding transcription factor activity
TCONS_00000170	XM_006499689.3	0.88446	0.000133	TCONS_00000170	NC_000067.7:58752444-58763708	MAX gene associated%2C transcript variant X3	NC_000068.8:119702993-119800610	29808	Mga	GO:0003700	DNA binding transcription factor activity
TCONS_00000170	NM_010226.2	0.726118	0.007496	TCONS_00000170	NC_000067.7:58752444-58763708	forkhead box S1	NC_000068.8:152773817-152775128	14239	Foxs1	GO:0003700	DNA binding transcription factor activity
TCONS_00000170	NM_007891.5	0.714262	0.009063	TCONS_00000170	NC_000067.7:58752444-58763708	E2F transcription factor 1%2C transcript variant 1	NC_000068.8:154401319-154411812	13555	E2f1	GO:0003700	DNA binding transcription factor activity
TCONS_00000170	NM_020255.3	-0.87062	0.000229	TCONS_00000170	NC_000067.7:58752444-58763708	SCAN domain-containing 1	NC_000068.8:156153765-156154624	19018	Scand1	GO:0003700	DNA binding transcription factor activity
TCONS_00000170	TCONS_00003816	0.814734	0.001248	TCONS_00000170	NC_000067.7:58752444-58763708	TCONS_00003816	NC_000069.7:52175757-52235699	56458	Foxo1	GO:0003700	DNA binding transcription factor activity
TCONS_00000170	NM_019739.3	0.915882	2.9e-05	TCONS_00000170	NC_000067.7:58752444-58763708	forkhead box O1	NC_000069.7:52175757-52257530	56458	Foxo1	GO:0003700	DNA binding transcription factor activity
TCONS_00000170	NM_001347233.1	0.736211	0.00633	TCONS_00000170	NC_000067.7:58752444-58763708	TSC22 domain family%2C member 2%2C transcript variant 2	NC_000069.7:58322140-58374208	72033	Tsc22d2	GO:0003700	DNA binding transcription factor activity
TCONS_00000170	NM_023214.7	0.848271	0.000488	TCONS_00000170	NC_000067.7:58752444-58763708	solute carrier family 30 (zinc transporter)%2C member 7	NC_000069.7:115732621-115801055	66500	Slc30a7	GO:0003700	DNA binding transcription factor activity
TCONS_00000170	NM_008689.2	0.907081	4.7e-05	TCONS_00000170	NC_000067.7:58752444-58763708	nuclear factor of kappa light polypeptide gene enhancer in B cells 1%2C p105	NC_000069.7:135290415-135397308	18033	Nfkb1	GO:0003700	DNA binding transcription factor activity
TCONS_00000170	NM_013497.4	0.851745	0.000437	TCONS_00000170	NC_000067.7:58752444-58763708	cAMP responsive element binding protein 3	NC_000070.7:43562657-43567061	12913	Creb3	GO:0003700	DNA binding transcription factor activity
TCONS_00000170	NM_001368177.1	0.705211	0.010414	TCONS_00000170	NC_000067.7:58752444-58763708	GC-rich promoter binding protein 1-like 1%2C transcript variant 2	NC_000070.7:116415275-116451099	77110	Gpbp1l1	GO:0003700	DNA binding transcription factor activity
TCONS_00000170	NM_001290696.1	0.739434	0.005988	TCONS_00000170	NC_000067.7:58752444-58763708	forkhead box J3%2C transcript variant 2	NC_000070.7:119396857-119486316	230700	Foxj3	GO:0003700	DNA binding transcription factor activity
TCONS_00000170	XM_030253741.2	0.719205	0.008383	TCONS_00000170	NC_000067.7:58752444-58763708	arginine glutamic acid dipeptide (RE) repeats%2C transcript variant X2	NC_000070.7:150452812-150706423	68703	Rere	GO:0003700	DNA binding transcription factor activity
TCONS_00000170	XM_030253751.2	-0.761808	0.003983	TCONS_00000170	NC_000067.7:58752444-58763708	arginine glutamic acid dipeptide (RE) repeats%2C transcript variant X15	NC_000070.7:150561931-150706423	68703	Rere	GO:0003700	DNA binding transcription factor activity
TCONS_00000170	XM_036164921.1	0.798459	0.001846	TCONS_00000170	NC_000067.7:58752444-58763708	recombination signal binding protein for immunoglobulin kappa J region%2C transcript variant X4	NC_000071.7:53759203-53814703	19664	Rbpj	GO:0003700	DNA binding transcription factor activity
TCONS_00000170	XM_006503796.5	0.931178	1.1e-05	TCONS_00000170	NC_000067.7:58752444-58763708	recombination signal binding protein for immunoglobulin kappa J region%2C transcript variant X1	NC_000071.7:53766547-53814703	19664	Rbpj	GO:0003700	DNA binding transcription factor activity
TCONS_00000170	TCONS_00007037	0.740014	0.005928	TCONS_00000170	NC_000067.7:58752444-58763708	TCONS_00007037	NC_000071.7:119812586-119822330	21386	Tbx3	GO:0003700	DNA binding transcription factor activity
TCONS_00000170	NM_016683.2	0.740215	0.005908	TCONS_00000170	NC_000067.7:58752444-58763708	zinc finger with KRAB and SCAN domains 5%2C transcript variant 1	NC_000071.7:145141368-145158560	22757	Zkscan5	GO:0003700	DNA binding transcription factor activity
TCONS_00000170	NM_001197322.1	-0.715333	0.008912	TCONS_00000170	NC_000067.7:58752444-58763708	forkhead box P1%2C transcript variant 3	NC_000072.7:98902302-99005259	108655	Foxp1	GO:0003700	DNA binding transcription factor activity
TCONS_00000170	XM_030255071.2	0.709082	0.009819	TCONS_00000170	NC_000067.7:58752444-58763708	forkhead box P1%2C transcript variant X36	NC_000072.7:98902302-99005269	108655	Foxp1	GO:0003700	DNA binding transcription factor activity
TCONS_00000170	XM_006505311.5	0.792405	0.002118	TCONS_00000170	NC_000067.7:58752444-58763708	forkhead box P1%2C transcript variant X3	NC_000072.7:98902302-99243560	108655	Foxp1	GO:0003700	DNA binding transcription factor activity
TCONS_00000170	NM_001127330.2	0.777551	0.002912	TCONS_00000170	NC_000067.7:58752444-58763708	peroxisome proliferator activated receptor gamma%2C transcript variant 1	NC_000072.7:115337911-115467362	19016	Pparg	GO:0003700	DNA binding transcription factor activity
TCONS_00000170	XM_036166087.1	0.746462	0.005291	TCONS_00000170	NC_000067.7:58752444-58763708	cAMP responsive element binding protein-like 2%2C transcript variant X2	NC_000072.7:134807422-134835894	232430	Crebl2	GO:0003700	DNA binding transcription factor activity
TCONS_00000170	TCONS_00010553	0.810622	0.001382	TCONS_00000170	NC_000067.7:58752444-58763708	TCONS_00010553	NC_000073.7:34611846-34755991	12611	Cebpg	GO:0003700	DNA binding transcription factor activity
TCONS_00000170	NM_009884.3	0.735509	0.006407	TCONS_00000170	NC_000067.7:58752444-58763708	CCAAT/enhancer binding protein (C/EBP)%2C gamma	NC_000073.7:34745846-34755991	12611	Cebpg	GO:0003700	DNA binding transcription factor activity
TCONS_00000170	NM_001382511.1	-0.750097	0.004956	TCONS_00000170	NC_000067.7:58752444-58763708	zinc finger and SCAN domain containing 2%2C transcript variant 2	NC_000073.7:80510678-80526290	22691	Zscan2	GO:0003700	DNA binding transcription factor activity
TCONS_00000170	NM_145151.3	0.738214	0.006116	TCONS_00000170	NC_000067.7:58752444-58763708	CREB/ATF bZIP transcription factor%2C transcript variant 1	NC_000073.7:90091988-90097251	233490	Crebzf	GO:0003700	DNA binding transcription factor activity
TCONS_00000170	NM_001166585.2	0.904196	5.4e-05	TCONS_00000170	NC_000067.7:58752444-58763708	TEA domain family member 1%2C transcript variant 3	NC_000073.7:112278562-112505991	21676	Tead1	GO:0003700	DNA binding transcription factor activity
TCONS_00000170	NM_016850.3	0.767693	0.003553	TCONS_00000170	NC_000067.7:58752444-58763708	interferon regulatory factor 7%2C transcript variant 1	NC_000073.7:140843095-140846337	54123	Irf7	GO:0003700	DNA binding transcription factor activity
TCONS_00000170	NM_010546.2	0.746153	0.005321	TCONS_00000170	NC_000067.7:58752444-58763708	inhibitor of kappaB kinase beta%2C transcript variant 2	NC_000074.7:23149220-23196599	16150	Ikbkb	GO:0003700	DNA binding transcription factor activity
TCONS_00000170	XM_011242265.3	0.908204	4.4e-05	TCONS_00000170	NC_000067.7:58752444-58763708	nuclear receptor subfamily 2%2C group F%2C member 6%2C transcript variant X4	NC_000074.7:71826761-71831012	13864	Nr2f6	GO:0003700	DNA binding transcription factor activity
TCONS_00000170	NM_010150.2	0.903998	5.5e-05	TCONS_00000170	NC_000067.7:58752444-58763708	nuclear receptor subfamily 2%2C group F%2C member 6	NC_000074.7:71826762-71834596	13864	Nr2f6	GO:0003700	DNA binding transcription factor activity
TCONS_00000170	NM_008539.4	0.835143	0.000722	TCONS_00000170	NC_000067.7:58752444-58763708	SMAD family member 1	NC_000074.7:80065023-80126057	17125	Smad1	GO:0003700	DNA binding transcription factor activity
TCONS_00000170	NM_010906.4	0.77663	0.002968	TCONS_00000170	NC_000067.7:58752444-58763708	nuclear factor I/X%2C transcript variant 2	NC_000074.7:85431340-85526997	18032	Nfix	GO:0003700	DNA binding transcription factor activity
TCONS_00000170	XM_036153804.1	-0.720992	0.008146	TCONS_00000170	NC_000067.7:58752444-58763708	nuclear factor I/X%2C transcript variant X20	NC_000074.7:85431345-85527086	18032	Nfix	GO:0003700	DNA binding transcription factor activity
TCONS_00000170	TCONS_00012277	0.820701	0.001071	TCONS_00000170	NC_000067.7:58752444-58763708	TCONS_00012277	NC_000074.7:85435477-85526325	18032	Nfix	GO:0003700	DNA binding transcription factor activity
TCONS_00000170	NM_001301811.1	0.81152	0.001352	TCONS_00000170	NC_000067.7:58752444-58763708	interferon regulatory factor 8%2C transcript variant 1	NC_000074.7:121465377-121483433	15900	Irf8	GO:0003700	DNA binding transcription factor activity
TCONS_00000170	TCONS_00012478	0.71418	0.009075	TCONS_00000170	NC_000067.7:58752444-58763708	TCONS_00012478	NC_000074.7:123351876-123404914	12398	Cbfa2t3	GO:0003700	DNA binding transcription factor activity
TCONS_00000170	NM_001372534.1	0.854843	0.000396	TCONS_00000170	NC_000067.7:58752444-58763708	E26 avian leukemia oncogene 1%2C 5' domain%2C transcript variant 3	NC_000075.7:32547536-32669116	23871	Ets1	GO:0003700	DNA binding transcription factor activity
TCONS_00000170	NM_001359464.1	0.731755	0.006827	TCONS_00000170	NC_000067.7:58752444-58763708	zinc finger protein 202%2C transcript variant 2	NC_000075.7:40103611-40124900	80902	Zfp202	GO:0003700	DNA binding transcription factor activity
TCONS_00000170	NM_183316.2	-0.758271	0.00426	TCONS_00000170	NC_000067.7:58752444-58763708	small nuclear RNA activating complex%2C polypeptide 5	NC_000075.7:64086578-64089970	330959	Snapc5	GO:0003700	DNA binding transcription factor activity
TCONS_00000170	TCONS_00013920	0.705531	0.010364	TCONS_00000170	NC_000067.7:58752444-58763708	TCONS_00013920	NC_000075.7:122677987-122694972	235682	Zfp445	GO:0003700	DNA binding transcription factor activity
TCONS_00000170	XM_030244940.1	-0.753668	0.004642	TCONS_00000170	NC_000067.7:58752444-58763708	nuclear factor I/C%2C transcript variant X2	NC_000076.7:81232024-81267753	18029	Nfic	GO:0003700	DNA binding transcription factor activity
TCONS_00000170	XM_036155891.1	0.900757	6.4e-05	TCONS_00000170	NC_000067.7:58752444-58763708	E2F transcription factor 7%2C transcript variant X1	NC_000076.7:110580798-110623234	52679	E2f7	GO:0003700	DNA binding transcription factor activity
TCONS_00000170	NM_009284.2	0.887519	0.000117	TCONS_00000170	NC_000067.7:58752444-58763708	signal transducer and activator of transcription 6	NC_000076.7:127478854-127496856	20852	Stat6	GO:0003700	DNA binding transcription factor activity
TCONS_00000170	NM_019963.2	0.847376	0.000502	TCONS_00000170	NC_000067.7:58752444-58763708	signal transducer and activator of transcription 2	NC_000076.7:128106366-128128722	20847	Stat2	GO:0003700	DNA binding transcription factor activity
TCONS_00000170	NM_013842.3	0.745724	0.005362	TCONS_00000170	NC_000067.7:58752444-58763708	X-box binding protein 1%2C transcript variant 1	NC_000077.7:5470640-5475993	22433	Xbp1	GO:0003700	DNA binding transcription factor activity
TCONS_00000170	NM_009044.3	0.837458	0.000676	TCONS_00000170	NC_000067.7:58752444-58763708	reticuloendotheliosis oncogene	NC_000077.7:23686846-23720969	19696	Rel	GO:0003700	DNA binding transcription factor activity
TCONS_00000170	NM_001362682.1	0.72924	0.007119	TCONS_00000170	NC_000067.7:58752444-58763708	signal transducer and activator of transcription 5B%2C transcript variant 3	NC_000077.7:100671556-100704196	20851	Stat5b	GO:0003700	DNA binding transcription factor activity
TCONS_00000170	NM_001113563.2	0.732208	0.006775	TCONS_00000170	NC_000067.7:58752444-58763708	signal transducer and activator of transcription 5B%2C transcript variant 2	NC_000077.7:100671556-100741407	20851	Stat5b	GO:0003700	DNA binding transcription factor activity
TCONS_00000170	TCONS_00017083	0.726918	0.007398	TCONS_00000170	NC_000067.7:58752444-58763708	TCONS_00017083	NC_000077.7:106673520-106679733	13207	Ddx5	GO:0000988	transcription factor activity, protein binding
TCONS_00000170	NM_033270.2	0.831075	0.00081	TCONS_00000170	NC_000067.7:58752444-58763708	E2F transcription factor 6%2C transcript variant 1	NC_000078.7:16860965-16876753	50496	E2f6	GO:0003700	DNA binding transcription factor activity
TCONS_00000170	NM_010234.3	0.736708	0.006277	TCONS_00000170	NC_000067.7:58752444-58763708	FBJ osteosarcoma oncogene	NC_000078.7:85520663-85524048	14281	Fos	GO:0003700	DNA binding transcription factor activity
TCONS_00000170	XM_006516232.5	0.764819	0.003758	TCONS_00000170	NC_000067.7:58752444-58763708	forkhead box N3%2C transcript variant X1	NC_000078.7:99156339-99529918	71375	Foxn3	GO:0003700	DNA binding transcription factor activity
TCONS_00000170	XM_006516239.4	0.752887	0.004709	TCONS_00000170	NC_000067.7:58752444-58763708	forkhead box N3%2C transcript variant X12	NC_000078.7:99156339-99529926	71375	Foxn3	GO:0003700	DNA binding transcription factor activity
TCONS_00000170	NM_016684.2	-0.719161	0.008388	TCONS_00000170	NC_000067.7:58752444-58763708	zinc finger and SCAN domain containing 12	NC_000079.7:21546989-21556472	22758	Zscan12	GO:0003700	DNA binding transcription factor activity
TCONS_00000170	NM_139141.4	0.733999	0.006573	TCONS_00000170	NC_000067.7:58752444-58763708	zinc finger with KRAB and SCAN domains 8%2C transcript variant 1	NC_000079.7:21697390-21715284	93681	Zkscan8	GO:0003700	DNA binding transcription factor activity
TCONS_00000170	XM_036157843.1	0.735007	0.006462	TCONS_00000170	NC_000067.7:58752444-58763708	E2F transcription factor 3%2C transcript variant X4	NC_000079.7:30090557-30131040	13557	E2f3	GO:0003700	DNA binding transcription factor activity
TCONS_00000170	NM_178364.5	0.776882	0.002953	TCONS_00000170	NC_000067.7:58752444-58763708	zinc finger protein 369	NC_000079.7:65426667-65445609	170936	Zfp369	GO:0003700	DNA binding transcription factor activity
TCONS_00000170	NM_010151.3	0.762448	0.003935	TCONS_00000170	NC_000067.7:58752444-58763708	nuclear receptor subfamily 2%2C group F%2C member 1%2C transcript variant 1	NC_000079.7:78337091-78346992	13865	Nr2f1	GO:0003700	DNA binding transcription factor activity
TCONS_00000170	XM_036158539.1	0.740723	0.005856	TCONS_00000170	NC_000067.7:58752444-58763708	thyroid hormone receptor beta%2C transcript variant X19	NC_000080.7:4429598-4810538	21834	Thrb	GO:0003700	DNA binding transcription factor activity
TCONS_00000170	NM_011243.2	0.792377	0.002119	TCONS_00000170	NC_000067.7:58752444-58763708	retinoic acid receptor%2C beta%2C transcript variant beta2	NC_000080.7:5894286-6038924	218772	Rarb	GO:0003700	DNA binding transcription factor activity
TCONS_00000170	NM_008092.4	0.70725	0.010097	TCONS_00000170	NC_000067.7:58752444-58763708	GATA binding protein 4%2C transcript variant 2	NC_000080.7:63436362-63482720	14463	Gata4	GO:0003700	DNA binding transcription factor activity
TCONS_00000170	NM_009366.4	0.859579	0.000338	TCONS_00000170	NC_000067.7:58752444-58763708	TSC22 domain family%2C member 1%2C transcript variant 2	NC_000080.7:76741949-76745205	21807	Tsc22d1	GO:0003700	DNA binding transcription factor activity
TCONS_00000170	NM_007920.4	0.915094	3e-05	TCONS_00000170	NC_000067.7:58752444-58763708	E74-like factor 1%2C transcript variant 1	NC_000080.7:79718633-79819931	13709	Elf1	GO:0003700	DNA binding transcription factor activity
TCONS_00000170	TCONS_00020648	-0.755874	0.004456	TCONS_00000170	NC_000067.7:58752444-58763708	TCONS_00020648	NC_000081.7:11984074-11996093	20024	Sub1	GO:0000988	transcription factor activity, protein binding
TCONS_00000170	XM_011245387.4	0.775675	0.003027	TCONS_00000170	NC_000067.7:58752444-58763708	predicted gene%2C 41291	NC_000081.7:34081887-34083373	105245911	Gm41291	GO:0003700	DNA binding transcription factor activity
TCONS_00000170	NM_009716.3	0.92335	1.8e-05	TCONS_00000170	NC_000067.7:58752444-58763708	activating transcription factor 4%2C transcript variant 1	NC_000081.7:80139384-80141746	11911	Atf4	GO:0003700	DNA binding transcription factor activity
TCONS_00000170	NM_011144.6	0.768722	0.003481	TCONS_00000170	NC_000067.7:58752444-58763708	peroxisome proliferator activated receptor alpha%2C transcript variant 1	NC_000081.7:85619976-85691052	19013	Ppara	GO:0003700	DNA binding transcription factor activity
TCONS_00000170	NM_001025432.1	-0.781673	0.002672	TCONS_00000170	NC_000067.7:58752444-58763708	CREB binding protein	NC_000082.7:3901911-4031268	12914	Crebbp	GO:0000988	transcription factor activity, protein binding
TCONS_00000170	XM_030248977.2	-0.735942	0.006359	TCONS_00000170	NC_000067.7:58752444-58763708	GA repeat binding protein%2C alpha%2C transcript variant X7	NC_000082.7:84631794-84660671	14390	Gabpa	GO:0003700	DNA binding transcription factor activity
TCONS_00000170	NM_011809.3	0.875578	0.00019	TCONS_00000170	NC_000067.7:58752444-58763708	E26 avian leukemia oncogene 2%2C 3' domain	NC_000082.7:95503273-95522093	23872	Ets2	GO:0003700	DNA binding transcription factor activity
TCONS_00000170	NM_001033496.3	0.760655	0.004072	TCONS_00000170	NC_000067.7:58752444-58763708	zinc finger protein 213	NC_000083.7:23775740-23783200	449521	Zfp213	GO:0003700	DNA binding transcription factor activity
TCONS_00000170	TCONS_00022266	0.894189	8.7e-05	TCONS_00000170	NC_000067.7:58752444-58763708	TCONS_00022266	NC_000083.7:34247248-34257377	20182	Rxrb	GO:0003700	DNA binding transcription factor activity
TCONS_00000170	NM_001205214.1	-0.712713	0.009284	TCONS_00000170	NC_000067.7:58752444-58763708	retinoid X receptor beta%2C transcript variant 1	NC_000083.7:34250785-34257377	20182	Rxrb	GO:0003700	DNA binding transcription factor activity
TCONS_00000170	NM_011306.4	-0.877922	0.000173	TCONS_00000170	NC_000067.7:58752444-58763708	retinoid X receptor beta%2C transcript variant 2	NC_000083.7:34250785-34257377	20182	Rxrb	GO:0003700	DNA binding transcription factor activity
TCONS_00000170	NM_017406.4	0.828306	0.000874	TCONS_00000170	NC_000067.7:58752444-58763708	activating transcription factor 6 beta	NC_000083.7:34866119-34874048	12915	Atf6b	GO:0003700	DNA binding transcription factor activity
TCONS_00000170	XM_030249551.2	0.76801	0.003531	TCONS_00000170	NC_000067.7:58752444-58763708	nuclear transcription factor-Y alpha%2C transcript variant X1	NC_000083.7:48693912-48716788	18044	Nfya	GO:0003700	DNA binding transcription factor activity
TCONS_00000170	NM_001357447.1	0.909903	4e-05	TCONS_00000170	NC_000067.7:58752444-58763708	zinc finger protein 24%2C transcript variant 2	NC_000084.7:24142773-24153427	59057	Zfp24	GO:0003700	DNA binding transcription factor activity
TCONS_00000170	NM_001361211.1	0.780966	0.002712	TCONS_00000170	NC_000067.7:58752444-58763708	nuclear receptor subfamily 3%2C group C%2C member 1%2C transcript variant 4	NC_000084.7:39543597-39622829	14815	Nr3c1	GO:0003700	DNA binding transcription factor activity
TCONS_00000170	NM_001361209.1	0.803583	0.001638	TCONS_00000170	NC_000067.7:58752444-58763708	nuclear receptor subfamily 3%2C group C%2C member 1%2C transcript variant 2	NC_000084.7:39543597-39623723	14815	Nr3c1	GO:0003700	DNA binding transcription factor activity
TCONS_00000170	XM_006525665.5	0.724537	0.007692	TCONS_00000170	NC_000067.7:58752444-58763708	nuclear receptor subfamily 3%2C group C%2C member 1%2C transcript variant X4	NC_000084.7:39545027-39622582	14815	Nr3c1	GO:0003700	DNA binding transcription factor activity
TCONS_00000170	XM_006525661.4	0.701556	0.011001	TCONS_00000170	NC_000067.7:58752444-58763708	nuclear receptor subfamily 3%2C group C%2C member 1%2C transcript variant X5	NC_000084.7:39545027-39624598	14815	Nr3c1	GO:0003700	DNA binding transcription factor activity
TCONS_00000170	XM_006525701.4	0.854168	0.000405	TCONS_00000170	NC_000067.7:58752444-58763708	SMAD family member 4%2C transcript variant X2	NC_000084.7:73769250-73836640	17128	Smad4	GO:0003700	DNA binding transcription factor activity
TCONS_00000170	NM_007953.2	0.898704	7.1e-05	TCONS_00000170	NC_000067.7:58752444-58763708	estrogen related receptor%2C alpha	NC_000085.7:6888344-6899176	26379	Esrra	GO:0003700	DNA binding transcription factor activity
TCONS_00000170	XM_006526927.4	0.728984	0.00715	TCONS_00000170	NC_000067.7:58752444-58763708	myelin regulatory factor%2C transcript variant X1	NC_000085.7:10185634-10218134	225908	Myrf	GO:0003700	DNA binding transcription factor activity
TCONS_00000170	NM_001381876.1	0.828686	0.000865	TCONS_00000170	NC_000067.7:58752444-58763708	E74-like factor 4 (ets domain transcription factor)%2C transcript variant 1	NC_000086.8:47499926-47543196	56501	Elf4	GO:0003700	DNA binding transcription factor activity
TCONS_00000170	XM_036162179.1	0.818488	0.001134	TCONS_00000170	NC_000067.7:58752444-58763708	activating transcription factor 1%2C pseudogene	NC_000086.8:52885449-52886480	100040260	Atf1-ps	GO:0003700	DNA binding transcription factor activity
XR_865464.1	TCONS_00000734	0.758255	0.004261	predicted gene%2C 38137%2C transcript variant X4	NC_000067.7:60902260-60922220	TCONS_00000734	NC_000067.7:187340978-187947081	26381	Esrrg	GO:0003700	DNA binding transcription factor activity
XR_865464.1	NM_001290576.1	0.864045	0.00029	predicted gene%2C 38137%2C transcript variant X4	NC_000067.7:60902260-60922220	pre B cell leukemia homeobox 3%2C transcript variant b	NC_000068.8:34061468-34262057	18516	Pbx3	GO:0003700	DNA binding transcription factor activity
XR_865464.1	XM_006501545.3	0.736904	0.006255	predicted gene%2C 38137%2C transcript variant X4	NC_000067.7:60902260-60922220	ets variant 3%2C transcript variant X1	NC_000069.7:87432883-87447463	27049	Etv3	GO:0003700	DNA binding transcription factor activity
XR_865464.1	NM_001164062.1	0.705178	0.010419	predicted gene%2C 38137%2C transcript variant X4	NC_000067.7:60902260-60922220	signal transducer and activator of transcription 5A%2C transcript variant 2	NC_000077.7:100751309-100775995	20850	Stat5a	GO:0003700	DNA binding transcription factor activity
XR_865464.1	XM_006516232.5	0.759351	0.004174	predicted gene%2C 38137%2C transcript variant X4	NC_000067.7:60902260-60922220	forkhead box N3%2C transcript variant X1	NC_000078.7:99156339-99529918	71375	Foxn3	GO:0003700	DNA binding transcription factor activity
XR_865464.1	XM_006516239.4	0.742898	0.005637	predicted gene%2C 38137%2C transcript variant X4	NC_000067.7:60902260-60922220	forkhead box N3%2C transcript variant X12	NC_000078.7:99156339-99529926	71375	Foxn3	GO:0003700	DNA binding transcription factor activity
XR_865464.1	TCONS_00020419	0.782623	0.002619	predicted gene%2C 38137%2C transcript variant X4	NC_000067.7:60902260-60922220	TCONS_00020419	NC_000081.7:81686910-81711064	21685	Tef	GO:0003700	DNA binding transcription factor activity
XR_865464.1	NM_001359276.1	0.757108	0.004354	predicted gene%2C 38137%2C transcript variant X4	NC_000067.7:60902260-60922220	zinc finger protein 449%2C transcript variant 2	NC_000086.8:55391756-55411034	78619	Zfp449	GO:0003700	DNA binding transcription factor activity
XR_865462.2	XM_030251727.2	0.73257	0.006734	predicted gene%2C 38137%2C transcript variant X1	NC_000067.7:60906346-60922220	MAX gene associated%2C transcript variant X15	NC_000068.8:119703031-119800610	29808	Mga	GO:0003700	DNA binding transcription factor activity
XR_865462.2	XM_036163295.1	0.857413	0.000364	predicted gene%2C 38137%2C transcript variant X1	NC_000067.7:60906346-60922220	E74-like factor 2%2C transcript variant X15	NC_000069.7:51162705-51247925	69257	Elf2	GO:0003700	DNA binding transcription factor activity
XR_865462.2	NM_001379655.1	0.831825	0.000793	predicted gene%2C 38137%2C transcript variant X1	NC_000067.7:60906346-60922220	GATA zinc finger domain containing 2B%2C transcript variant 1	NC_000069.7:90200487-90270710	229542	Gatad2b	GO:0003700	DNA binding transcription factor activity
XR_865462.2	XM_006501359.5	0.819509	0.001105	predicted gene%2C 38137%2C transcript variant X1	NC_000067.7:60906346-60922220	GATA zinc finger domain containing 2B%2C transcript variant X1	NC_000069.7:90225295-90270712	229542	Gatad2b	GO:0003700	DNA binding transcription factor activity
XR_865462.2	XM_011248191.4	0.728055	0.007261	predicted gene%2C 38137%2C transcript variant X1	NC_000067.7:60906346-60922220	T-box 5%2C transcript variant X2	NC_000071.7:119973849-120023285	21388	Tbx5	GO:0003700	DNA binding transcription factor activity
XR_865462.2	XM_006505902.2	0.791455	0.002163	predicted gene%2C 38137%2C transcript variant X1	NC_000067.7:60906346-60922220	nuclear receptor subfamily 2%2C group C%2C member 2%2C transcript variant X1	NC_000072.7:92068635-92150039	22026	Nr2c2	GO:0003700	DNA binding transcription factor activity
XR_865462.2	XM_036153873.1	0.732034	0.006795	predicted gene%2C 38137%2C transcript variant X1	NC_000067.7:60906346-60922220	transcription factor Dp 1%2C transcript variant X11	NC_000074.7:13388763-13428448	21781	Tfdp1	GO:0003700	DNA binding transcription factor activity
XR_865462.2	TCONS_00013921	0.710425	0.009619	predicted gene%2C 38137%2C transcript variant X1	NC_000067.7:60906346-60922220	TCONS_00013921	NC_000075.7:122677987-122695059	235682	Zfp445	GO:0003700	DNA binding transcription factor activity
XR_865462.2	XM_006531918.5	0.896676	7.8e-05	predicted gene%2C 38137%2C transcript variant X1	NC_000067.7:60906346-60922220	mastermind like transcriptional coactivator 1%2C transcript variant X1	NC_000077.7:50146457-50183955	103806	Maml1	GO:0000988	transcription factor activity, protein binding
XR_865462.2	XM_017315418.2	0.702775	0.010802	predicted gene%2C 38137%2C transcript variant X1	NC_000067.7:60906346-60922220	nuclear factor%2C interleukin 3%2C regulated%2C transcript variant X1	NC_000079.7:53121244-53133891	18030	Nfil3	GO:0003700	DNA binding transcription factor activity
XR_865462.2	NM_001164042.1	0.736745	0.006273	predicted gene%2C 38137%2C transcript variant X1	NC_000067.7:60906346-60922220	SMAD family member 5%2C transcript variant 3	NC_000079.7:56851480-56890191	17129	Smad5	GO:0003700	DNA binding transcription factor activity
XR_865462.2	TCONS_00018413	0.704239	0.010568	predicted gene%2C 38137%2C transcript variant X1	NC_000067.7:60906346-60922220	TCONS_00018413	NC_000079.7:65426667-65452038	170936	Zfp369	GO:0003700	DNA binding transcription factor activity
XR_865462.2	NM_001113417.1	0.734276	0.006542	predicted gene%2C 38137%2C transcript variant X1	NC_000067.7:60906346-60922220	thyroid hormone receptor beta%2C transcript variant 1	NC_000080.7:4431607-4808736	21834	Thrb	GO:0003700	DNA binding transcription factor activity
XR_865462.2	XM_006520650.1	0.769223	0.003447	predicted gene%2C 38137%2C transcript variant X1	NC_000067.7:60906346-60922220	retinoic acid receptor%2C gamma%2C transcript variant X1	NC_000081.7:102143372-102165957	19411	Rarg	GO:0003700	DNA binding transcription factor activity
XR_865462.2	XM_011246997.4	0.773011	0.003195	predicted gene%2C 38137%2C transcript variant X1	NC_000067.7:60906346-60922220	zinc finger protein 397%2C transcript variant X2	NC_000084.7:24085797-24098030	69256	Zfp397	GO:0003700	DNA binding transcription factor activity
XR_865462.2	TCONS_00025052	0.719295	0.00837	predicted gene%2C 38137%2C transcript variant X1	NC_000067.7:60906346-60922220	TCONS_00025052	NC_000086.8:55392105-55411026	78619	Zfp449	GO:0003700	DNA binding transcription factor activity
XR_865460.3	XM_030251727.2	0.707149	0.010113	predicted gene%2C 39650	NC_000067.7:60926093-60926693	MAX gene associated%2C transcript variant X15	NC_000068.8:119703031-119800610	29808	Mga	GO:0003700	DNA binding transcription factor activity
XR_865460.3	NM_007891.5	0.748923	0.005062	predicted gene%2C 39650	NC_000067.7:60926093-60926693	E2F transcription factor 1%2C transcript variant 1	NC_000068.8:154401319-154411812	13555	E2f1	GO:0003700	DNA binding transcription factor activity
XR_865460.3	XM_006501359.5	0.712444	0.009323	predicted gene%2C 39650	NC_000067.7:60926093-60926693	GATA zinc finger domain containing 2B%2C transcript variant X1	NC_000069.7:90225295-90270712	229542	Gatad2b	GO:0003700	DNA binding transcription factor activity
XR_865460.3	XM_006537572.3	0.753933	0.004619	predicted gene%2C 39650	NC_000067.7:60926093-60926693	RUNX1 translocation partner 1%2C transcript variant X6	NC_000070.7:13743746-13895056	12395	Runx1t1	GO:0003700	DNA binding transcription factor activity
XR_865460.3	NM_194060.1	0.810763	0.001378	predicted gene%2C 39650	NC_000067.7:60926093-60926693	forkhead box O6	NC_000070.7:120124274-120144458	329934	Foxo6	GO:0003700	DNA binding transcription factor activity
XR_865460.3	TCONS_00007036	0.759489	0.004163	predicted gene%2C 39650	NC_000067.7:60926093-60926693	TCONS_00007036	NC_000071.7:119808908-119822897	21386	Tbx3	GO:0003700	DNA binding transcription factor activity
XR_865460.3	NM_008036.2	0.755012	0.004528	predicted gene%2C 39650	NC_000067.7:60926093-60926693	FBJ osteosarcoma oncogene B%2C transcript variant 1	NC_000073.7:19036620-19043970	14282	Fosb	GO:0003700	DNA binding transcription factor activity
XR_865460.3	XM_006541012.5	0.823285	0.001001	predicted gene%2C 39650	NC_000067.7:60926093-60926693	sphingosine kinase 2%2C transcript variant X2	NC_000073.7:45359684-45364557	56632	Sphk2	GO:0003700	DNA binding transcription factor activity
XR_865460.3	NM_001252601.1	0.759762	0.004142	predicted gene%2C 39650	NC_000067.7:60926093-60926693	interferon regulatory factor 7%2C transcript variant 3	NC_000073.7:140843095-140846337	54123	Irf7	GO:0003700	DNA binding transcription factor activity
XR_865460.3	XM_006510822.4	0.795877	0.001959	predicted gene%2C 39650	NC_000067.7:60926093-60926693	SMAD family member 6%2C transcript variant X1	NC_000075.7:63860526-63929374	17130	Smad6	GO:0003700	DNA binding transcription factor activity
XR_865460.3	XM_006512120.4	0.734811	0.006483	predicted gene%2C 39650	NC_000067.7:60926093-60926693	zinc finger protein 445%2C transcript variant X4	NC_000075.7:122677987-122695075	235682	Zfp445	GO:0003700	DNA binding transcription factor activity
XR_865460.3	XM_006531918.5	0.801529	0.001719	predicted gene%2C 39650	NC_000067.7:60926093-60926693	mastermind like transcriptional coactivator 1%2C transcript variant X1	NC_000077.7:50146457-50183955	103806	Maml1	GO:0000988	transcription factor activity, protein binding
XR_865460.3	NM_001302375.1	-0.721307	0.008105	predicted gene%2C 39650	NC_000067.7:60926093-60926693	zinc finger with KRAB and SCAN domains 6%2C transcript variant 3	NC_000077.7:65698000-65720065	52712	Zkscan6	GO:0003700	DNA binding transcription factor activity
XR_865460.3	NM_001362682.1	0.716465	0.008755	predicted gene%2C 39650	NC_000067.7:60926093-60926693	signal transducer and activator of transcription 5B%2C transcript variant 3	NC_000077.7:100671556-100704196	20851	Stat5b	GO:0003700	DNA binding transcription factor activity
XR_865460.3	XM_017315418.2	0.731734	0.006829	predicted gene%2C 39650	NC_000067.7:60926093-60926693	nuclear factor%2C interleukin 3%2C regulated%2C transcript variant X1	NC_000079.7:53121244-53133891	18030	Nfil3	GO:0003700	DNA binding transcription factor activity
XR_865460.3	XM_006517971.5	0.712346	0.009337	predicted gene%2C 39650	NC_000067.7:60926093-60926693	thyroid hormone receptor beta%2C transcript variant X14	NC_000080.7:4429598-4551410	21834	Thrb	GO:0003700	DNA binding transcription factor activity
XR_865460.3	NM_001113417.1	0.905354	5.1e-05	predicted gene%2C 39650	NC_000067.7:60926093-60926693	thyroid hormone receptor beta%2C transcript variant 1	NC_000080.7:4431607-4808736	21834	Thrb	GO:0003700	DNA binding transcription factor activity
XR_865460.3	NM_153484.3	0.707894	0.009999	predicted gene%2C 39650	NC_000067.7:60926093-60926693	thyrotroph embryonic factor%2C transcript variant 2	NC_000081.7:81686873-81711064	21685	Tef	GO:0003700	DNA binding transcription factor activity
XR_865460.3	XM_036160410.1	0.829988	0.000835	predicted gene%2C 39650	NC_000067.7:60926093-60926693	peroxisome proliferator activator receptor delta%2C transcript variant X3	NC_000083.7:28451687-28520446	19015	Ppard	GO:0003700	DNA binding transcription factor activity
XR_865460.3	XM_011246997.4	0.886936	0.00012	predicted gene%2C 39650	NC_000067.7:60926093-60926693	zinc finger protein 397%2C transcript variant X2	NC_000084.7:24085797-24098030	69256	Zfp397	GO:0003700	DNA binding transcription factor activity
XR_865460.3	XM_017318022.3	0.780348	0.002748	predicted gene%2C 39650	NC_000067.7:60926093-60926693	zinc finger and SCAN domain containing 30%2C transcript variant X1	NC_000084.7:24095824-24120362	328918	Zscan30	GO:0003700	DNA binding transcription factor activity
TCONS_00000196	XM_030252077.2	0.883292	0.00014	TCONS_00000196	NC_000067.7:61860316-61863839	nuclear receptor coactivator 2%2C transcript variant X11	NC_000067.7:13212641-13364673	17978	Ncoa2	GO:0000988	transcription factor activity, protein binding
TCONS_00000196	NM_001205314.1	0.776801	0.002958	TCONS_00000196	NC_000067.7:61860316-61863839	signal transducer and activator of transcription 1%2C transcript variant 3	NC_000067.7:52158596-52201024	20846	Stat1	GO:0003700	DNA binding transcription factor activity
TCONS_00000196	NM_001357627.1	0.778993	0.002826	TCONS_00000196	NC_000067.7:61860316-61863839	signal transducer and activator of transcription 1%2C transcript variant 4	NC_000067.7:52158596-52201024	20846	Stat1	GO:0003700	DNA binding transcription factor activity
TCONS_00000196	NM_001159731.1	0.855847	0.000383	TCONS_00000196	NC_000067.7:61860316-61863839	retinoid X receptor gamma%2C transcript variant 2	NC_000067.7:167445833-167467192	20183	Rxrg	GO:0003700	DNA binding transcription factor activity
TCONS_00000196	NM_001081304.1	0.811693	0.001346	TCONS_00000196	NC_000067.7:61860316-61863839	activating transcription factor 6	NC_000067.7:170532025-170695340	226641	Atf6	GO:0003700	DNA binding transcription factor activity
TCONS_00000196	NM_011935.3	0.756939	0.004368	TCONS_00000196	NC_000067.7:61860316-61863839	estrogen-related receptor gamma%2C transcript variant 1	NC_000067.7:187730023-187947081	26381	Esrrg	GO:0003700	DNA binding transcription factor activity
TCONS_00000196	NM_011305.3	0.706395	0.010229	TCONS_00000196	NC_000067.7:61860316-61863839	retinoid X receptor alpha%2C transcript variant 1	NC_000068.8:27567212-27653331	20181	Rxra	GO:0003700	DNA binding transcription factor activity
TCONS_00000196	NM_178778.3	0.829286	0.000851	TCONS_00000196	NC_000067.7:61860316-61863839	suppressor of cancer cell invasion	NC_000068.8:38956225-39080742	320271	Scai	GO:0000988	transcription factor activity, protein binding
TCONS_00000196	XM_036157712.1	0.781299	0.002693	TCONS_00000196	NC_000067.7:61860316-61863839	activating transcription factor 2%2C transcript variant X21	NC_000068.8:73646861-73722908	11909	Atf2	GO:0003700	DNA binding transcription factor activity
TCONS_00000196	NM_001284370.1	0.714086	0.009088	TCONS_00000196	NC_000067.7:61860316-61863839	activating transcription factor 2%2C transcript variant 5	NC_000068.8:73656690-73722983	11909	Atf2	GO:0003700	DNA binding transcription factor activity
TCONS_00000196	NM_001284371.1	0.711264	0.009495	TCONS_00000196	NC_000067.7:61860316-61863839	activating transcription factor 2%2C transcript variant 6	NC_000068.8:73656690-73722983	11909	Atf2	GO:0003700	DNA binding transcription factor activity
TCONS_00000196	XM_036157713.1	0.890532	0.000103	TCONS_00000196	NC_000067.7:61860316-61863839	activating transcription factor 2%2C transcript variant X23	NC_000068.8:73660896-73722972	11909	Atf2	GO:0003700	DNA binding transcription factor activity
TCONS_00000196	NM_012051.4	0.868121	0.000251	TCONS_00000196	NC_000067.7:61860316-61863839	ets variant 3%2C transcript variant 3	NC_000069.7:87432884-87447465	27049	Etv3	GO:0003700	DNA binding transcription factor activity
TCONS_00000196	NM_023214.7	0.800706	0.001753	TCONS_00000196	NC_000067.7:61860316-61863839	solute carrier family 30 (zinc transporter)%2C member 7	NC_000069.7:115732621-115801055	66500	Slc30a7	GO:0003700	DNA binding transcription factor activity
TCONS_00000196	XM_036163227.1	0.735218	0.006438	TCONS_00000196	NC_000067.7:61860316-61863839	solute carrier family 30 (zinc transporter)%2C member 7%2C transcript variant X1	NC_000069.7:115765490-115801079	66500	Slc30a7	GO:0003700	DNA binding transcription factor activity
TCONS_00000196	XM_030253119.2	0.732297	0.006765	TCONS_00000196	NC_000067.7:61860316-61863839	RUNX1 translocation partner 1%2C transcript variant X7	NC_000070.7:13797031-13895056	12395	Runx1t1	GO:0003700	DNA binding transcription factor activity
TCONS_00000196	NM_013497.4	0.844743	0.000544	TCONS_00000196	NC_000067.7:61860316-61863839	cAMP responsive element binding protein 3	NC_000070.7:43562657-43567061	12913	Creb3	GO:0003700	DNA binding transcription factor activity
TCONS_00000196	NM_008687.6	0.839469	0.000637	TCONS_00000196	NC_000067.7:61860316-61863839	nuclear factor I/B%2C transcript variant 3	NC_000070.7:82208409-82424016	18028	Nfib	GO:0003700	DNA binding transcription factor activity
TCONS_00000196	NM_029868.3	0.701073	0.01108	TCONS_00000196	NC_000067.7:61860316-61863839	GC-rich promoter binding protein 1-like 1%2C transcript variant 1	NC_000070.7:116414854-116451099	77110	Gpbp1l1	GO:0003700	DNA binding transcription factor activity
TCONS_00000196	NM_001368177.1	0.765542	0.003706	TCONS_00000196	NC_000067.7:61860316-61863839	GC-rich promoter binding protein 1-like 1%2C transcript variant 2	NC_000070.7:116415275-116451099	77110	Gpbp1l1	GO:0003700	DNA binding transcription factor activity
TCONS_00000196	NM_001290696.1	0.831947	0.00079	TCONS_00000196	NC_000067.7:61860316-61863839	forkhead box J3%2C transcript variant 2	NC_000070.7:119396857-119486316	230700	Foxj3	GO:0003700	DNA binding transcription factor activity
TCONS_00000196	XM_006504628.4	0.710198	0.009652	TCONS_00000196	NC_000067.7:61860316-61863839	zinc finger with KRAB and SCAN domains 1%2C transcript variant X1	NC_000071.7:138083311-138106084	74570	Zkscan1	GO:0003700	DNA binding transcription factor activity
TCONS_00000196	NM_199068.2	0.835338	0.000718	TCONS_00000196	NC_000067.7:61860316-61863839	forkhead box K1	NC_000071.7:142387251-142447770	17425	Foxk1	GO:0003700	DNA binding transcription factor activity
TCONS_00000196	NM_016683.2	0.799561	0.0018	TCONS_00000196	NC_000067.7:61860316-61863839	zinc finger with KRAB and SCAN domains 5%2C transcript variant 1	NC_000071.7:145141368-145158560	22757	Zkscan5	GO:0003700	DNA binding transcription factor activity
TCONS_00000196	XM_036166039.1	0.73451	0.006516	TCONS_00000196	NC_000067.7:61860316-61863839	cAMP responsive element binding protein 5%2C transcript variant X1	NC_000072.7:53264153-53673025	231991	Creb5	GO:0003700	DNA binding transcription factor activity
TCONS_00000196	XM_006505320.4	0.78706	0.002382	TCONS_00000196	NC_000067.7:61860316-61863839	forkhead box P1%2C transcript variant X29	NC_000072.7:98902302-99030079	108655	Foxp1	GO:0003700	DNA binding transcription factor activity
TCONS_00000196	NM_022981.5	0.714622	0.009012	TCONS_00000196	NC_000067.7:61860316-61863839	zinc finger protein 110%2C transcript variant 2	NC_000073.7:12568687-12584513	65020	Zfp110	GO:0003700	DNA binding transcription factor activity
TCONS_00000196	XM_030242427.2	0.804774	0.001593	TCONS_00000196	NC_000067.7:61860316-61863839	zinc finger and SCAN domain containing 22%2C transcript variant X1	NC_000073.7:12637897-12642986	232878	Zscan22	GO:0003700	DNA binding transcription factor activity
TCONS_00000196	TCONS_00010406	0.832389	0.000781	TCONS_00000196	NC_000067.7:61860316-61863839	TCONS_00010406	NC_000073.7:19339987-19354009	19698	Relb	GO:0003700	DNA binding transcription factor activity
TCONS_00000196	TCONS_00010633	0.743616	0.005566	TCONS_00000196	NC_000067.7:61860316-61863839	TCONS_00010633	NC_000073.7:45354305-45370301	56632	Sphk2	GO:0003700	DNA binding transcription factor activity
TCONS_00000196	XM_006507606.2	0.814075	0.001269	TCONS_00000196	NC_000067.7:61860316-61863839	CREB/ATF bZIP transcription factor%2C transcript variant X1	NC_000073.7:90091941-90097590	233490	Crebzf	GO:0003700	DNA binding transcription factor activity
TCONS_00000196	XM_011242265.3	0.784833	0.002499	TCONS_00000196	NC_000067.7:61860316-61863839	nuclear receptor subfamily 2%2C group F%2C member 6%2C transcript variant X4	NC_000074.7:71826761-71831012	13864	Nr2f6	GO:0003700	DNA binding transcription factor activity
TCONS_00000196	NM_001371061.1	0.739696	0.005961	TCONS_00000196	NC_000067.7:61860316-61863839	nuclear factor I/X%2C transcript variant 14	NC_000074.7:85431340-85500039	18032	Nfix	GO:0003700	DNA binding transcription factor activity
TCONS_00000196	XM_036153804.1	-0.731811	0.00682	TCONS_00000196	NC_000067.7:61860316-61863839	nuclear factor I/X%2C transcript variant X20	NC_000074.7:85431345-85527086	18032	Nfix	GO:0003700	DNA binding transcription factor activity
TCONS_00000196	TCONS_00011736	0.837109	0.000682	TCONS_00000196	NC_000067.7:61860316-61863839	TCONS_00011736	NC_000074.7:108020101-108106142	54446	Nfat5	GO:0003700	DNA binding transcription factor activity
TCONS_00000196	NM_194263.2	0.825512	0.000943	TCONS_00000196	NC_000067.7:61860316-61863839	T-box 20%2C transcript variant 1	NC_000075.7:24632107-24685599	57246	Tbx20	GO:0003700	DNA binding transcription factor activity
TCONS_00000196	NM_020496.3	0.743616	0.005566	TCONS_00000196	NC_000067.7:61860316-61863839	T-box 20%2C transcript variant 2	NC_000075.7:24651543-24685599	57246	Tbx20	GO:0003700	DNA binding transcription factor activity
TCONS_00000196	NM_001359464.1	0.766618	0.003629	TCONS_00000196	NC_000067.7:61860316-61863839	zinc finger protein 202%2C transcript variant 2	NC_000075.7:40103611-40124900	80902	Zfp202	GO:0003700	DNA binding transcription factor activity
TCONS_00000196	NM_013842.3	0.7205	0.008211	TCONS_00000196	NC_000067.7:61860316-61863839	X-box binding protein 1%2C transcript variant 1	NC_000077.7:5470640-5475993	22433	Xbp1	GO:0003700	DNA binding transcription factor activity
TCONS_00000196	NM_001355676.1	0.703963	0.010612	TCONS_00000196	NC_000067.7:61860316-61863839	DEAD box helicase 5%2C transcript variant 2	NC_000077.7:106671180-106679733	13207	Ddx5	GO:0000988	transcription factor activity, protein binding
TCONS_00000196	NM_007840.3	0.925733	1.6e-05	TCONS_00000196	NC_000067.7:61860316-61863839	DEAD box helicase 5	NC_000077.7:106671181-106679320	13207	Ddx5	GO:0000988	transcription factor activity, protein binding
TCONS_00000196	NM_001039115.2	0.720898	0.008158	TCONS_00000196	NC_000067.7:61860316-61863839	zinc finger with KRAB and SCAN domains 4	NC_000079.7:21663018-21669677	544922	Zkscan4	GO:0003700	DNA binding transcription factor activity
TCONS_00000196	NM_008592.2	0.73092	0.006923	TCONS_00000196	NC_000067.7:61860316-61863839	forkhead box C1	NC_000079.7:31990628-31994618	17300	Foxc1	GO:0003700	DNA binding transcription factor activity
TCONS_00000196	NM_010151.3	0.716502	0.00875	TCONS_00000196	NC_000067.7:61860316-61863839	nuclear receptor subfamily 2%2C group F%2C member 1%2C transcript variant 1	NC_000079.7:78337091-78346992	13865	Nr2f1	GO:0003700	DNA binding transcription factor activity
TCONS_00000196	TCONS_00019973	0.797344	0.001894	TCONS_00000196	NC_000067.7:61860316-61863839	TCONS_00019973	NC_000080.7:63436369-63506854	14463	Gata4	GO:0003700	DNA binding transcription factor activity
TCONS_00000196	NM_032000.2	0.746856	0.005254	TCONS_00000196	NC_000067.7:61860316-61863839	transcriptional repressor GATA binding 1%2C transcript variant 2	NC_000081.7:50518152-50753437	83925	Trps1	GO:0003700	DNA binding transcription factor activity
TCONS_00000196	TCONS_00020420	0.730607	0.006959	TCONS_00000196	NC_000067.7:61860316-61863839	TCONS_00020420	NC_000081.7:81686912-81711064	21685	Tef	GO:0003700	DNA binding transcription factor activity
TCONS_00000196	NM_007497.3	0.762727	0.003913	TCONS_00000196	NC_000067.7:61860316-61863839	activating transcription factor 1	NC_000081.7:100125739-100159129	11908	Atf1	GO:0003700	DNA binding transcription factor activity
TCONS_00000196	XM_006520352.5	0.85965	0.000337	TCONS_00000196	NC_000067.7:61860316-61863839	activating transcription factor 1%2C transcript variant X2	NC_000081.7:100126749-100159129	11908	Atf1	GO:0003700	DNA binding transcription factor activity
TCONS_00000196	XM_017316436.3	0.746849	0.005255	TCONS_00000196	NC_000067.7:61860316-61863839	nuclear receptor subfamily 4%2C group A%2C member 1%2C transcript variant X3	NC_000081.7:101155260-101172676	15370	Nr4a1	GO:0003700	DNA binding transcription factor activity
TCONS_00000196	NM_148924.3	0.864341	0.000287	TCONS_00000196	NC_000067.7:61860316-61863839	zinc finger protein 263	NC_000082.7:3561962-3568652	74120	Zfp263	GO:0003700	DNA binding transcription factor activity
TCONS_00000196	NM_001081217.1	0.78599	0.002437	TCONS_00000196	NC_000067.7:61860316-61863839	zinc finger protein 174	NC_000082.7:3665086-3676744	385674	Zfp174	GO:0003700	DNA binding transcription factor activity
TCONS_00000196	XM_006521754.5	0.751434	0.004837	TCONS_00000196	NC_000067.7:61860316-61863839	CREB binding protein%2C transcript variant X4	NC_000082.7:3899197-4031864	12914	Crebbp	GO:0000988	transcription factor activity, protein binding
TCONS_00000196	NM_023794.2	0.777805	0.002897	TCONS_00000196	NC_000067.7:61860316-61863839	ets variant 5%2C transcript variant 2	NC_000082.7:22200062-22258320	104156	Etv5	GO:0003700	DNA binding transcription factor activity
TCONS_00000196	NM_001033496.3	0.719149	0.00839	TCONS_00000196	NC_000067.7:61860316-61863839	zinc finger protein 213	NC_000083.7:23775740-23783200	449521	Zfp213	GO:0003700	DNA binding transcription factor activity
TCONS_00000196	NM_001205214.1	-0.709833	0.009707	TCONS_00000196	NC_000067.7:61860316-61863839	retinoid X receptor beta%2C transcript variant 1	NC_000083.7:34250785-34257377	20182	Rxrb	GO:0003700	DNA binding transcription factor activity
TCONS_00000196	NM_017463.3	0.719481	0.008346	TCONS_00000196	NC_000067.7:61860316-61863839	pre B cell leukemia homeobox 2	NC_000083.7:34811232-34816374	18515	Pbx2	GO:0003700	DNA binding transcription factor activity
TCONS_00000196	NM_001110832.1	0.710443	0.009616	TCONS_00000196	NC_000067.7:61860316-61863839	nuclear transcription factor-Y alpha%2C transcript variant 1	NC_000083.7:48693912-48716848	18044	Nfya	GO:0003700	DNA binding transcription factor activity
TCONS_00000196	NM_001357448.1	0.708141	0.009961	TCONS_00000196	NC_000067.7:61860316-61863839	zinc finger protein 24%2C transcript variant 3	NC_000084.7:24142773-24153427	59057	Zfp24	GO:0003700	DNA binding transcription factor activity
TCONS_00000196	NM_001361211.1	0.833639	0.000754	TCONS_00000196	NC_000067.7:61860316-61863839	nuclear receptor subfamily 3%2C group C%2C member 1%2C transcript variant 4	NC_000084.7:39543597-39622829	14815	Nr3c1	GO:0003700	DNA binding transcription factor activity
TCONS_00000196	NM_001361209.1	0.769543	0.003425	TCONS_00000196	NC_000067.7:61860316-61863839	nuclear receptor subfamily 3%2C group C%2C member 1%2C transcript variant 2	NC_000084.7:39543597-39623723	14815	Nr3c1	GO:0003700	DNA binding transcription factor activity
TCONS_00000196	NM_001164110.1	0.714897	0.008973	TCONS_00000196	NC_000067.7:61860316-61863839	nuclear factor of activated T cells%2C cytoplasmic%2C calcineurin dependent 1%2C transcript variant 4	NC_000084.7:80649419-80756286	18018	Nfatc1	GO:0003700	DNA binding transcription factor activity
TCONS_00000196	NM_019408.3	0.788565	0.002305	TCONS_00000196	NC_000067.7:61860316-61863839	nuclear factor of kappa light polypeptide gene enhancer in B cells 2%2C p49/p100%2C transcript variant 1	NC_000085.7:46294133-46300529	18034	Nfkb2	GO:0003700	DNA binding transcription factor activity
TCONS_00000196	TCONS_00025637	0.787133	0.002378	TCONS_00000196	NC_000067.7:61860316-61863839	TCONS_00025637	NC_000086.8:139474353-139499523	14605	Tsc22d3	GO:0003700	DNA binding transcription factor activity
TCONS_00000200	XM_030252077.2	0.811386	0.001357	TCONS_00000200	NC_000067.7:63144831-63168872	nuclear receptor coactivator 2%2C transcript variant X11	NC_000067.7:13212641-13364673	17978	Ncoa2	GO:0000988	transcription factor activity, protein binding
TCONS_00000200	NM_001081304.1	0.714425	0.00904	TCONS_00000200	NC_000067.7:63144831-63168872	activating transcription factor 6	NC_000067.7:170532025-170695340	226641	Atf6	GO:0003700	DNA binding transcription factor activity
TCONS_00000200	NM_178778.3	0.848278	0.000488	TCONS_00000200	NC_000067.7:63144831-63168872	suppressor of cancer cell invasion	NC_000068.8:38956225-39080742	320271	Scai	GO:0000988	transcription factor activity, protein binding
TCONS_00000200	NM_001284370.1	0.842343	0.000585	TCONS_00000200	NC_000067.7:63144831-63168872	activating transcription factor 2%2C transcript variant 5	NC_000068.8:73656690-73722983	11909	Atf2	GO:0003700	DNA binding transcription factor activity
TCONS_00000200	NM_001284371.1	0.874878	0.000195	TCONS_00000200	NC_000067.7:63144831-63168872	activating transcription factor 2%2C transcript variant 6	NC_000068.8:73656690-73722983	11909	Atf2	GO:0003700	DNA binding transcription factor activity
TCONS_00000200	XM_036157713.1	0.741732	0.005753	TCONS_00000200	NC_000067.7:63144831-63168872	activating transcription factor 2%2C transcript variant X23	NC_000068.8:73660896-73722972	11909	Atf2	GO:0003700	DNA binding transcription factor activity
TCONS_00000200	XM_006502031.4	0.712016	0.009385	TCONS_00000200	NC_000067.7:63144831-63168872	E74-like factor 2%2C transcript variant X4	NC_000069.7:51162705-51247925	69257	Elf2	GO:0003700	DNA binding transcription factor activity
TCONS_00000200	XM_030253119.2	0.786087	0.002432	TCONS_00000200	NC_000067.7:63144831-63168872	RUNX1 translocation partner 1%2C transcript variant X7	NC_000070.7:13797031-13895056	12395	Runx1t1	GO:0003700	DNA binding transcription factor activity
TCONS_00000200	NM_008687.6	0.713872	0.009118	TCONS_00000200	NC_000067.7:63144831-63168872	nuclear factor I/B%2C transcript variant 3	NC_000070.7:82208409-82424016	18028	Nfib	GO:0003700	DNA binding transcription factor activity
TCONS_00000200	XM_006505320.4	0.816621	0.00119	TCONS_00000200	NC_000067.7:63144831-63168872	forkhead box P1%2C transcript variant X29	NC_000072.7:98902302-99030079	108655	Foxp1	GO:0003700	DNA binding transcription factor activity
TCONS_00000200	NM_021899.3	0.716704	0.008722	TCONS_00000200	NC_000067.7:63144831-63168872	forkhead box J2	NC_000072.7:122797142-122822325	60611	Foxj2	GO:0003700	DNA binding transcription factor activity
TCONS_00000200	XM_006507606.2	0.795807	0.001962	TCONS_00000200	NC_000067.7:63144831-63168872	CREB/ATF bZIP transcription factor%2C transcript variant X1	NC_000073.7:90091941-90097590	233490	Crebzf	GO:0003700	DNA binding transcription factor activity
TCONS_00000200	TCONS_00011736	0.822581	0.001019	TCONS_00000200	NC_000067.7:63144831-63168872	TCONS_00011736	NC_000074.7:108020101-108106142	54446	Nfat5	GO:0003700	DNA binding transcription factor activity
TCONS_00000200	NM_013519.2	0.725214	0.007608	TCONS_00000200	NC_000067.7:63144831-63168872	forkhead box C2	NC_000074.7:121842909-121845634	14234	Foxc2	GO:0003700	DNA binding transcription factor activity
TCONS_00000200	NM_194263.2	0.786673	0.002402	TCONS_00000200	NC_000067.7:63144831-63168872	T-box 20%2C transcript variant 1	NC_000075.7:24632107-24685599	57246	Tbx20	GO:0003700	DNA binding transcription factor activity
TCONS_00000200	NM_020496.3	0.72424	0.00773	TCONS_00000200	NC_000067.7:63144831-63168872	T-box 20%2C transcript variant 2	NC_000075.7:24651543-24685599	57246	Tbx20	GO:0003700	DNA binding transcription factor activity
TCONS_00000200	NM_001376967.1	0.908329	4.4e-05	TCONS_00000200	NC_000067.7:63144831-63168872	forkhead box O3%2C transcript variant 1	NC_000076.7:42057840-42152691	56484	Foxo3	GO:0003700	DNA binding transcription factor activity
TCONS_00000200	NM_008688.3	-0.787364	0.002366	TCONS_00000200	NC_000067.7:63144831-63168872	nuclear factor I/C%2C transcript variant 1	NC_000076.7:81232024-81263007	18029	Nfic	GO:0003700	DNA binding transcription factor activity
TCONS_00000200	NM_009324.2	0.835677	0.000711	TCONS_00000200	NC_000067.7:63144831-63168872	T-box 2	NC_000077.7:85723440-85732774	21385	Tbx2	GO:0003700	DNA binding transcription factor activity
TCONS_00000200	NM_001313983.1	0.789429	0.002262	TCONS_00000200	NC_000067.7:63144831-63168872	thyroid hormone receptor alpha%2C transcript variant 1	NC_000077.7:98632610-98659832	21833	Thra	GO:0003700	DNA binding transcription factor activity
TCONS_00000200	TCONS_00015936	0.813976	0.001272	TCONS_00000200	NC_000067.7:63144831-63168872	TCONS_00015936	NC_000077.7:98632710-98659832	21833	Thra	GO:0003700	DNA binding transcription factor activity
TCONS_00000200	NM_007840.3	0.826971	0.000906	TCONS_00000200	NC_000067.7:63144831-63168872	DEAD box helicase 5	NC_000077.7:106671181-106679320	13207	Ddx5	GO:0000988	transcription factor activity, protein binding
TCONS_00000200	NM_030887.2	-0.876109	0.000186	TCONS_00000200	NC_000067.7:63144831-63168872	Jun dimerization protein 2%2C transcript variant 1	NC_000078.7:85646189-85686652	81703	Jdp2	GO:0003700	DNA binding transcription factor activity
TCONS_00000200	NM_001039115.2	0.728047	0.007262	TCONS_00000200	NC_000067.7:63144831-63168872	zinc finger with KRAB and SCAN domains 4	NC_000079.7:21663018-21669677	544922	Zkscan4	GO:0003700	DNA binding transcription factor activity
TCONS_00000200	NM_008592.2	0.75217	0.004772	TCONS_00000200	NC_000067.7:63144831-63168872	forkhead box C1	NC_000079.7:31990628-31994618	17300	Foxc1	GO:0003700	DNA binding transcription factor activity
TCONS_00000200	NM_023699.3	0.755853	0.004458	TCONS_00000200	NC_000067.7:63144831-63168872	nuclear factor of activated T cells%2C cytoplasmic%2C calcineurin dependent 4%2C transcript variant 1	NC_000080.7:56062251-56071400	73181	Nfatc4	GO:0003700	DNA binding transcription factor activity
TCONS_00000200	TCONS_00019973	0.865592	0.000274	TCONS_00000200	NC_000067.7:63144831-63168872	TCONS_00019973	NC_000080.7:63436369-63506854	14463	Gata4	GO:0003700	DNA binding transcription factor activity
TCONS_00000200	NM_001113418.1	0.704132	0.010585	TCONS_00000200	NC_000067.7:63144831-63168872	peroxisome proliferator activated receptor alpha%2C transcript variant 2	NC_000081.7:85619764-85691052	19013	Ppara	GO:0003700	DNA binding transcription factor activity
TCONS_00000200	NM_001310066.1	0.723863	0.007777	TCONS_00000200	NC_000067.7:63144831-63168872	activating transcription factor 7%2C transcript variant 1	NC_000081.7:102437070-102533899	223922	Atf7	GO:0003700	DNA binding transcription factor activity
TCONS_00000200	NM_023794.2	0.790022	0.002232	TCONS_00000200	NC_000067.7:63144831-63168872	ets variant 5%2C transcript variant 2	NC_000082.7:22200062-22258320	104156	Etv5	GO:0003700	DNA binding transcription factor activity
TCONS_00000200	NM_017463.3	0.871885	0.000218	TCONS_00000200	NC_000067.7:63144831-63168872	pre B cell leukemia homeobox 2	NC_000083.7:34811232-34816374	18515	Pbx2	GO:0003700	DNA binding transcription factor activity
TCONS_00000200	NM_010258.3	0.77769	0.002904	TCONS_00000200	NC_000067.7:63144831-63168872	GATA binding protein 6	NC_000084.7:11052509-11085635	14465	Gata6	GO:0003700	DNA binding transcription factor activity
TCONS_00000200	XM_017318209.3	0.72346	0.007828	TCONS_00000200	NC_000067.7:63144831-63168872	estrogen related receptor%2C alpha%2C transcript variant X3	NC_000085.7:6888344-6899182	26379	Esrra	GO:0003700	DNA binding transcription factor activity
XR_373467.3	NM_010880.3	-0.862374	0.000307	predicted gene%2C 36148%2C transcript variant X2	NC_000067.7:64555959-64557770	nucleolin	NC_000067.7:86272440-86287177	17975	Ncl	GO:0000988	transcription factor activity, protein binding
XR_373467.3	NM_001376957.1	0.719728	0.008313	predicted gene%2C 36148%2C transcript variant X2	NC_000067.7:64555959-64557770	ELK4%2C member of ETS oncogene family%2C transcript variant 5	NC_000067.7:131935357-131954186	13714	Elk4	GO:0003700	DNA binding transcription factor activity
XR_373467.3	NM_023326.2	-0.820599	0.001074	predicted gene%2C 36148%2C transcript variant X2	NC_000067.7:64555959-64557770	brain expressed myelocytomatosis oncogene	NC_000068.8:25596890-25597733	107771	Bmyc	GO:0003700	DNA binding transcription factor activity
XR_373467.3	XM_006498641.2	0.851387	0.000442	predicted gene%2C 36148%2C transcript variant X2	NC_000067.7:64555959-64557770	CBFA2/RUNX1 translocation partner 2%2C transcript variant X2	NC_000068.8:154278017-154381276	12396	Cbfa2t2	GO:0003700	DNA binding transcription factor activity
XR_373467.3	XM_030247023.1	0.848527	0.000484	predicted gene%2C 36148%2C transcript variant X2	NC_000067.7:64555959-64557770	CBFA2/RUNX1 translocation partner 2%2C transcript variant X3	NC_000068.8:154278017-154381276	12396	Cbfa2t2	GO:0003700	DNA binding transcription factor activity
XR_373467.3	NM_009883.4	0.725477	0.007575	predicted gene%2C 36148%2C transcript variant X2	NC_000067.7:64555959-64557770	CCAAT/enhancer binding protein (C/EBP)%2C beta%2C transcript variant 1	NC_000068.8:167530834-167532352	12608	Cebpb	GO:0003700	DNA binding transcription factor activity
XR_373467.3	XM_006501164.4	0.700028	0.011253	predicted gene%2C 36148%2C transcript variant X2	NC_000067.7:64555959-64557770	RAR-related orphan receptor gamma%2C transcript variant X3	NC_000069.7:94280105-94298474	19885	Rorc	GO:0003700	DNA binding transcription factor activity
XR_373467.3	XM_006502842.4	-0.718941	0.008418	predicted gene%2C 36148%2C transcript variant X2	NC_000067.7:64555959-64557770	nuclear factor I/A%2C transcript variant X2	NC_000070.7:97660797-98007108	18027	Nfia	GO:0003700	DNA binding transcription factor activity
XR_373467.3	XM_006539139.4	-0.769936	0.003398	predicted gene%2C 36148%2C transcript variant X2	NC_000067.7:64555959-64557770	arginine glutamic acid dipeptide (RE) repeats%2C transcript variant X5	NC_000070.7:150365371-150706423	68703	Rere	GO:0003700	DNA binding transcription factor activity
XR_373467.3	XM_030253743.2	-0.785337	0.002472	predicted gene%2C 36148%2C transcript variant X2	NC_000067.7:64555959-64557770	arginine glutamic acid dipeptide (RE) repeats%2C transcript variant X4	NC_000070.7:150365371-150706423	68703	Rere	GO:0003700	DNA binding transcription factor activity
XR_373467.3	XM_030253746.2	-0.747271	0.005215	predicted gene%2C 36148%2C transcript variant X2	NC_000067.7:64555959-64557770	arginine glutamic acid dipeptide (RE) repeats%2C transcript variant X8	NC_000070.7:150365371-150706423	68703	Rere	GO:0003700	DNA binding transcription factor activity
XR_373467.3	XM_030253751.2	-0.754768	0.004549	predicted gene%2C 36148%2C transcript variant X2	NC_000067.7:64555959-64557770	arginine glutamic acid dipeptide (RE) repeats%2C transcript variant X15	NC_000070.7:150561931-150706423	68703	Rere	GO:0003700	DNA binding transcription factor activity
XR_373467.3	TCONS_00005659	0.743157	0.005611	predicted gene%2C 36148%2C transcript variant X2	NC_000067.7:64555959-64557770	TCONS_00005659	NC_000070.7:150652957-150706423	68703	Rere	GO:0003700	DNA binding transcription factor activity
XR_373467.3	NM_010155.3	-0.741597	0.005767	predicted gene%2C 36148%2C transcript variant X2	NC_000067.7:64555959-64557770	Ets2 repressor factor	NC_000073.7:24941984-24950183	13875	Erf	GO:0003700	DNA binding transcription factor activity
XR_373467.3	NM_009884.3	0.730714	0.006947	predicted gene%2C 36148%2C transcript variant X2	NC_000067.7:64555959-64557770	CCAAT/enhancer binding protein (C/EBP)%2C gamma	NC_000073.7:34745846-34755991	12611	Cebpg	GO:0003700	DNA binding transcription factor activity
XR_373467.3	NM_030693.2	0.769159	0.003451	predicted gene%2C 36148%2C transcript variant X2	NC_000067.7:64555959-64557770	activating transcription factor 5%2C transcript variant 1	NC_000073.7:44461679-44465082	107503	Atf5	GO:0003700	DNA binding transcription factor activity
XR_373467.3	NM_016850.3	0.752865	0.004711	predicted gene%2C 36148%2C transcript variant X2	NC_000067.7:64555959-64557770	interferon regulatory factor 7%2C transcript variant 1	NC_000073.7:140843095-140846337	54123	Irf7	GO:0003700	DNA binding transcription factor activity
XR_373467.3	NM_148952.1	0.734223	0.006548	predicted gene%2C 36148%2C transcript variant X2	NC_000067.7:64555959-64557770	E2F transcription factor 4	NC_000074.7:106024294-106032002	104394	E2f4	GO:0003700	DNA binding transcription factor activity
XR_373467.3	XM_036153795.1	0.797762	0.001876	predicted gene%2C 36148%2C transcript variant X2	NC_000067.7:64555959-64557770	nuclear factor of activated T cells%2C cytoplasmic%2C calcineurin dependent 3%2C transcript variant X2	NC_000074.7:106786187-106857169	18021	Nfatc3	GO:0003700	DNA binding transcription factor activity
XR_373467.3	XM_036155085.1	-0.738091	0.006129	predicted gene%2C 36148%2C transcript variant X2	NC_000067.7:64555959-64557770	small nuclear RNA activating complex%2C polypeptide 5%2C transcript variant X1	NC_000075.7:64086065-64089972	330959	Snapc5	GO:0003700	DNA binding transcription factor activity
XR_373467.3	XM_036154781.1	0.754852	0.004541	predicted gene%2C 36148%2C transcript variant X2	NC_000067.7:64555959-64557770	transcription factor Dp 2%2C transcript variant X30	NC_000075.7:96078347-96205699	211586	Tfdp2	GO:0003700	DNA binding transcription factor activity
XR_373467.3	XM_036154778.1	0.864314	0.000287	predicted gene%2C 36148%2C transcript variant X2	NC_000067.7:64555959-64557770	transcription factor Dp 2%2C transcript variant X11	NC_000075.7:96078524-96205699	211586	Tfdp2	GO:0003700	DNA binding transcription factor activity
XR_373467.3	TCONS_00013920	0.727334	0.007348	predicted gene%2C 36148%2C transcript variant X2	NC_000067.7:64555959-64557770	TCONS_00013920	NC_000075.7:122677987-122694972	235682	Zfp445	GO:0003700	DNA binding transcription factor activity
XR_373467.3	XM_036155891.1	0.840905	0.000611	predicted gene%2C 36148%2C transcript variant X2	NC_000067.7:64555959-64557770	E2F transcription factor 7%2C transcript variant X1	NC_000076.7:110580798-110623234	52679	E2f7	GO:0003700	DNA binding transcription factor activity
XR_373467.3	NM_019963.2	0.733849	0.00659	predicted gene%2C 36148%2C transcript variant X2	NC_000067.7:64555959-64557770	signal transducer and activator of transcription 2	NC_000076.7:128106366-128128722	20847	Stat2	GO:0003700	DNA binding transcription factor activity
XR_373467.3	NM_172563.3	0.774038	0.003129	predicted gene%2C 36148%2C transcript variant X2	NC_000067.7:64555959-64557770	hepatic leukemia factor	NC_000077.7:90227360-90281743	217082	Hlf	GO:0003700	DNA binding transcription factor activity
XR_373467.3	NM_001113563.2	0.713579	0.00916	predicted gene%2C 36148%2C transcript variant X2	NC_000067.7:64555959-64557770	signal transducer and activator of transcription 5B%2C transcript variant 2	NC_000077.7:100671556-100741407	20851	Stat5b	GO:0003700	DNA binding transcription factor activity
XR_373467.3	NM_011486.5	0.805728	0.001557	predicted gene%2C 36148%2C transcript variant X2	NC_000067.7:64555959-64557770	signal transducer and activator of transcription 3%2C transcript variant 3	NC_000077.7:100777631-100830366	20848	Stat3	GO:0003700	DNA binding transcription factor activity
XR_373467.3	NM_010234.3	0.702886	0.010784	predicted gene%2C 36148%2C transcript variant X2	NC_000067.7:64555959-64557770	FBJ osteosarcoma oncogene	NC_000078.7:85520663-85524048	14281	Fos	GO:0003700	DNA binding transcription factor activity
XR_373467.3	XM_006516232.5	0.898367	7.2e-05	predicted gene%2C 36148%2C transcript variant X2	NC_000067.7:64555959-64557770	forkhead box N3%2C transcript variant X1	NC_000078.7:99156339-99529918	71375	Foxn3	GO:0003700	DNA binding transcription factor activity
XR_373467.3	XM_006516239.4	0.855771	0.000384	predicted gene%2C 36148%2C transcript variant X2	NC_000067.7:64555959-64557770	forkhead box N3%2C transcript variant X12	NC_000078.7:99156339-99529926	71375	Foxn3	GO:0003700	DNA binding transcription factor activity
XR_373467.3	NM_017373.3	0.714041	0.009094	predicted gene%2C 36148%2C transcript variant X2	NC_000067.7:64555959-64557770	nuclear factor%2C interleukin 3%2C regulated	NC_000079.7:53121244-53135075	18030	Nfil3	GO:0003700	DNA binding transcription factor activity
XR_373467.3	NM_001164041.1	-0.757179	0.004348	predicted gene%2C 36148%2C transcript variant X2	NC_000067.7:64555959-64557770	SMAD family member 5%2C transcript variant 2	NC_000079.7:56850864-56890191	17129	Smad5	GO:0003700	DNA binding transcription factor activity
XR_373467.3	XM_011244745.3	0.782926	0.002602	predicted gene%2C 36148%2C transcript variant X2	NC_000067.7:64555959-64557770	thyroid hormone receptor beta%2C transcript variant X18	NC_000080.7:4431605-4808786	21834	Thrb	GO:0003700	DNA binding transcription factor activity
XR_373467.3	NM_001310481.1	0.747111	0.00523	predicted gene%2C 36148%2C transcript variant X2	NC_000067.7:64555959-64557770	transcriptional repressor GATA binding 1%2C transcript variant 1	NC_000081.7:50518152-50752445	83925	Trps1	GO:0003700	DNA binding transcription factor activity
XR_373467.3	NM_009716.3	0.758579	0.004235	predicted gene%2C 36148%2C transcript variant X2	NC_000067.7:64555959-64557770	activating transcription factor 4%2C transcript variant 1	NC_000081.7:80139384-80141746	11911	Atf4	GO:0003700	DNA binding transcription factor activity
XR_373467.3	NM_007679.4	0.712638	0.009295	predicted gene%2C 36148%2C transcript variant X2	NC_000067.7:64555959-64557770	CCAAT/enhancer binding protein (C/EBP)%2C delta	NC_000082.7:15705149-15707409	12609	Cebpd	GO:0003700	DNA binding transcription factor activity
XR_373467.3	NM_001311066.1	0.770722	0.003346	predicted gene%2C 36148%2C transcript variant X2	NC_000067.7:64555959-64557770	cAMP responsive element modulator%2C transcript variant 17	NC_000084.7:3266353-3281132	12916	Crem	GO:0003700	DNA binding transcription factor activity
XR_373467.3	XM_036162179.1	0.709253	0.009793	predicted gene%2C 36148%2C transcript variant X2	NC_000067.7:64555959-64557770	activating transcription factor 1%2C pseudogene	NC_000086.8:52885449-52886480	100040260	Atf1-ps	GO:0003700	DNA binding transcription factor activity
XR_373467.3	TCONS_00025632	0.768076	0.003526	predicted gene%2C 36148%2C transcript variant X2	NC_000067.7:64555959-64557770	TCONS_00025632	NC_000086.8:139440276-139447588	14605	Tsc22d3	GO:0003700	DNA binding transcription factor activity
XR_865486.2	XM_036162714.1	0.810456	0.001388	predicted gene%2C 36148%2C transcript variant X1	NC_000067.7:64555959-64557785	nuclear receptor coactivator 2%2C transcript variant X28	NC_000067.7:13209348-13443930	17978	Ncoa2	GO:0000988	transcription factor activity, protein binding
XR_865486.2	XM_030252095.2	0.711304	0.009489	predicted gene%2C 36148%2C transcript variant X1	NC_000067.7:64555959-64557785	nuclear receptor coactivator 2%2C transcript variant X29	NC_000067.7:13209348-13443953	17978	Ncoa2	GO:0000988	transcription factor activity, protein binding
XR_865486.2	XM_006530280.1	-0.836527	0.000694	predicted gene%2C 36148%2C transcript variant X1	NC_000067.7:64555959-64557785	T-box 5%2C transcript variant X3	NC_000071.7:119970732-120023285	21388	Tbx5	GO:0003700	DNA binding transcription factor activity
XR_865486.2	NM_001285519.1	-0.720043	0.008271	predicted gene%2C 36148%2C transcript variant X1	NC_000067.7:64555959-64557785	nuclear receptor subfamily 1%2C group H%2C member 2%2C transcript variant 4	NC_000073.7:44199039-44203389	22260	Nr1h2	GO:0003700	DNA binding transcription factor activity
XR_865486.2	XM_030244202.1	-0.765492	0.003709	predicted gene%2C 36148%2C transcript variant X1	NC_000067.7:64555959-64557785	transcription factor Dp 2%2C transcript variant X40	NC_000075.7:96078524-96205699	211586	Tfdp2	GO:0003700	DNA binding transcription factor activity
XR_865486.2	NM_016767.2	-0.83659	0.000693	predicted gene%2C 36148%2C transcript variant X1	NC_000067.7:64555959-64557785	basic leucine zipper transcription factor%2C ATF-like	NC_000078.7:85733493-85755861	53314	Batf	GO:0003700	DNA binding transcription factor activity
XR_865486.2	XM_006516234.3	-0.7472	0.005222	predicted gene%2C 36148%2C transcript variant X1	NC_000067.7:64555959-64557785	forkhead box N3%2C transcript variant X5	NC_000078.7:99156339-99359270	71375	Foxn3	GO:0003700	DNA binding transcription factor activity
XR_865486.2	XM_006520476.5	-0.731714	0.006831	predicted gene%2C 36148%2C transcript variant X1	NC_000067.7:64555959-64557785	heat shock factor 1%2C transcript variant X7	NC_000081.7:76361654-76385178	15499	Hsf1	GO:0003700	DNA binding transcription factor activity
XR_865486.2	XM_030249551.2	-0.888832	0.000111	predicted gene%2C 36148%2C transcript variant X1	NC_000067.7:64555959-64557785	nuclear transcription factor-Y alpha%2C transcript variant X1	NC_000083.7:48693912-48716788	18044	Nfya	GO:0003700	DNA binding transcription factor activity
XR_865486.2	XM_030249554.2	-0.74419	0.00551	predicted gene%2C 36148%2C transcript variant X1	NC_000067.7:64555959-64557785	nuclear transcription factor-Y alpha%2C transcript variant X7	NC_000083.7:48693912-48716815	18044	Nfya	GO:0003700	DNA binding transcription factor activity
XR_865486.2	XM_006525661.4	-0.705161	0.010422	predicted gene%2C 36148%2C transcript variant X1	NC_000067.7:64555959-64557785	nuclear receptor subfamily 3%2C group C%2C member 1%2C transcript variant X5	NC_000084.7:39545027-39624598	14815	Nr3c1	GO:0003700	DNA binding transcription factor activity
XR_865486.2	NM_010754.5	-0.710163	0.009658	predicted gene%2C 36148%2C transcript variant X1	NC_000067.7:64555959-64557785	SMAD family member 2%2C transcript variant 1	NC_000084.7:76374771-76444818	17126	Smad2	GO:0003700	DNA binding transcription factor activity
XR_003947846.1	XM_030252077.2	0.787402	0.002364	uncharacterized LOC115487097	NC_000067.7:67050251-67060010	nuclear receptor coactivator 2%2C transcript variant X11	NC_000067.7:13212641-13364673	17978	Ncoa2	GO:0000988	transcription factor activity, protein binding
XR_003947846.1	XM_017319360.3	0.765236	0.003728	uncharacterized LOC115487097	NC_000067.7:67050251-67060010	POU domain%2C class 2%2C transcription factor 1%2C transcript variant X5	NC_000067.7:165692718-165802814	18986	Pou2f1	GO:0003700	DNA binding transcription factor activity
XR_003947846.1	TCONS_00001431	0.806472	0.001529	uncharacterized LOC115487097	NC_000067.7:67050251-67060010	TCONS_00001431	NC_000067.7:167947715-168259738	18514	Pbx1	GO:0003700	DNA binding transcription factor activity
XR_003947846.1	NM_011305.3	0.874603	0.000197	uncharacterized LOC115487097	NC_000067.7:67050251-67060010	retinoid X receptor alpha%2C transcript variant 1	NC_000068.8:27567212-27653331	20181	Rxra	GO:0003700	DNA binding transcription factor activity
XR_003947846.1	XM_006502034.5	0.767076	0.003596	uncharacterized LOC115487097	NC_000067.7:67050251-67060010	E74-like factor 2%2C transcript variant X13	NC_000069.7:51162705-51184879	69257	Elf2	GO:0003700	DNA binding transcription factor activity
XR_003947846.1	XM_030252807.1	0.730771	0.00694	uncharacterized LOC115487097	NC_000067.7:67050251-67060010	E74-like factor 2%2C transcript variant X14	NC_000069.7:51162705-51247925	69257	Elf2	GO:0003700	DNA binding transcription factor activity
XR_003947846.1	XM_006537572.3	0.86161	0.000315	uncharacterized LOC115487097	NC_000067.7:67050251-67060010	RUNX1 translocation partner 1%2C transcript variant X6	NC_000070.7:13743746-13895056	12395	Runx1t1	GO:0003700	DNA binding transcription factor activity
XR_003947846.1	XM_030253119.2	0.834112	0.000744	uncharacterized LOC115487097	NC_000067.7:67050251-67060010	RUNX1 translocation partner 1%2C transcript variant X7	NC_000070.7:13797031-13895056	12395	Runx1t1	GO:0003700	DNA binding transcription factor activity
XR_003947846.1	NM_008687.6	0.742353	0.005691	uncharacterized LOC115487097	NC_000067.7:67050251-67060010	nuclear factor I/B%2C transcript variant 3	NC_000070.7:82208409-82424016	18028	Nfib	GO:0003700	DNA binding transcription factor activity
XR_003947846.1	XM_006503796.5	0.709762	0.009717	uncharacterized LOC115487097	NC_000067.7:67050251-67060010	recombination signal binding protein for immunoglobulin kappa J region%2C transcript variant X1	NC_000071.7:53766547-53814703	19664	Rbpj	GO:0003700	DNA binding transcription factor activity
XR_003947846.1	NM_133921.3	0.835149	0.000722	uncharacterized LOC115487097	NC_000067.7:67050251-67060010	nuclear transcription factor%2C X-box binding-like 1%2C transcript variant 1	NC_000071.7:72670646-72716988	100978	Nfxl1	GO:0003700	DNA binding transcription factor activity
XR_003947846.1	NM_001044704.2	0.763864	0.003829	uncharacterized LOC115487097	NC_000067.7:67050251-67060010	zinc finger and SCAN domain containing 21%2C transcript variant 3	NC_000071.7:138115166-138132527	22697	Zscan21	GO:0003700	DNA binding transcription factor activity
XR_003947846.1	XM_036166087.1	0.911322	3.7e-05	uncharacterized LOC115487097	NC_000067.7:67050251-67060010	cAMP responsive element binding protein-like 2%2C transcript variant X2	NC_000072.7:134807422-134835894	232430	Crebl2	GO:0003700	DNA binding transcription factor activity
XR_003947846.1	NM_011565.3	-0.716099	0.008805	uncharacterized LOC115487097	NC_000067.7:67050251-67060010	TEA domain family member 2%2C transcript variant 2	NC_000073.7:44865215-44882892	21677	Tead2	GO:0003700	DNA binding transcription factor activity
XR_003947846.1	NM_145151.3	0.750472	0.004922	uncharacterized LOC115487097	NC_000067.7:67050251-67060010	CREB/ATF bZIP transcription factor%2C transcript variant 1	NC_000073.7:90091988-90097251	233490	Crebzf	GO:0003700	DNA binding transcription factor activity
XR_003947846.1	TCONS_00011523	0.882748	0.000143	uncharacterized LOC115487097	NC_000067.7:67050251-67060010	TCONS_00011523	NC_000074.7:77628957-77673956	110784	Nr3c2	GO:0003700	DNA binding transcription factor activity
XR_003947846.1	NM_001297601.2	0.708389	0.009924	uncharacterized LOC115487097	NC_000067.7:67050251-67060010	nuclear factor I/X%2C transcript variant 4	NC_000074.7:85431340-85500039	18032	Nfix	GO:0003700	DNA binding transcription factor activity
XR_003947846.1	XM_036153804.1	-0.776914	0.002951	uncharacterized LOC115487097	NC_000067.7:67050251-67060010	nuclear factor I/X%2C transcript variant X20	NC_000074.7:85431345-85527086	18032	Nfix	GO:0003700	DNA binding transcription factor activity
XR_003947846.1	NM_022309.4	0.792248	0.002125	uncharacterized LOC115487097	NC_000067.7:67050251-67060010	core binding factor beta%2C transcript variant 1	NC_000074.7:105897305-105944621	12400	Cbfb	GO:0000988	transcription factor activity, protein binding
XR_003947846.1	NM_001301811.1	0.798706	0.001836	uncharacterized LOC115487097	NC_000067.7:67050251-67060010	interferon regulatory factor 8%2C transcript variant 1	NC_000074.7:121465377-121483433	15900	Irf8	GO:0003700	DNA binding transcription factor activity
XR_003947846.1	NM_001372534.1	0.740249	0.005904	uncharacterized LOC115487097	NC_000067.7:67050251-67060010	E26 avian leukemia oncogene 1%2C 5' domain%2C transcript variant 3	NC_000075.7:32547536-32669116	23871	Ets1	GO:0003700	DNA binding transcription factor activity
XR_003947846.1	NM_023814.4	0.710382	0.009625	uncharacterized LOC115487097	NC_000067.7:67050251-67060010	T-box18	NC_000075.7:87584852-87613313	76365	Tbx18	GO:0003700	DNA binding transcription factor activity
XR_003947846.1	TCONS_00013921	0.715515	0.008887	uncharacterized LOC115487097	NC_000067.7:67050251-67060010	TCONS_00013921	NC_000075.7:122677987-122695059	235682	Zfp445	GO:0003700	DNA binding transcription factor activity
XR_003947846.1	NM_001322268.1	0.758657	0.004229	uncharacterized LOC115487097	NC_000067.7:67050251-67060010	ELK3%2C member of ETS oncogene family%2C transcript variant 2	NC_000076.7:93083277-93147021	13713	Elk3	GO:0003700	DNA binding transcription factor activity
XR_003947846.1	NM_009284.2	0.754201	0.004597	uncharacterized LOC115487097	NC_000067.7:67050251-67060010	signal transducer and activator of transcription 6	NC_000076.7:127478854-127496856	20852	Stat6	GO:0003700	DNA binding transcription factor activity
XR_003947846.1	TCONS_00016947	0.738183	0.006119	uncharacterized LOC115487097	NC_000067.7:67050251-67060010	TCONS_00016947	NC_000077.7:98632465-98666203	217166	Nr1d1	GO:0003700	DNA binding transcription factor activity
XR_003947846.1	XM_030247246.2	0.766812	0.003615	uncharacterized LOC115487097	NC_000067.7:67050251-67060010	zinc finger and SCAN domain containing 12%2C transcript variant X1	NC_000079.7:21546981-21556458	22758	Zscan12	GO:0003700	DNA binding transcription factor activity
XR_003947846.1	NM_001039115.2	0.704233	0.010569	uncharacterized LOC115487097	NC_000067.7:67050251-67060010	zinc finger with KRAB and SCAN domains 4	NC_000079.7:21663018-21669677	544922	Zkscan4	GO:0003700	DNA binding transcription factor activity
XR_003947846.1	NM_011243.2	0.70711	0.010119	uncharacterized LOC115487097	NC_000067.7:67050251-67060010	retinoic acid receptor%2C beta%2C transcript variant beta2	NC_000080.7:5894286-6038924	218772	Rarb	GO:0003700	DNA binding transcription factor activity
XR_003947846.1	NM_007920.4	0.710726	0.009574	uncharacterized LOC115487097	NC_000067.7:67050251-67060010	E74-like factor 1%2C transcript variant 1	NC_000080.7:79718633-79819931	13709	Elf1	GO:0003700	DNA binding transcription factor activity
XR_003947846.1	XM_011245517.4	-0.704619	0.010508	uncharacterized LOC115487097	NC_000067.7:67050251-67060010	peroxisome proliferator activated receptor alpha%2C transcript variant X3	NC_000081.7:85619111-85691052	19013	Ppara	GO:0003700	DNA binding transcription factor activity
XR_003947846.1	NM_001081217.1	0.802932	0.001664	uncharacterized LOC115487097	NC_000067.7:67050251-67060010	zinc finger protein 174	NC_000082.7:3665086-3676744	385674	Zfp174	GO:0003700	DNA binding transcription factor activity
XR_003947846.1	NM_011809.3	0.716558	0.008742	uncharacterized LOC115487097	NC_000067.7:67050251-67060010	E26 avian leukemia oncogene 2%2C 3' domain	NC_000082.7:95503273-95522093	23872	Ets2	GO:0003700	DNA binding transcription factor activity
XR_003947846.1	TCONS_00022266	0.777296	0.002928	uncharacterized LOC115487097	NC_000067.7:67050251-67060010	TCONS_00022266	NC_000083.7:34247248-34257377	20182	Rxrb	GO:0003700	DNA binding transcription factor activity
XR_003947846.1	NM_001205214.1	-0.793372	0.002072	uncharacterized LOC115487097	NC_000067.7:67050251-67060010	retinoid X receptor beta%2C transcript variant 1	NC_000083.7:34250785-34257377	20182	Rxrb	GO:0003700	DNA binding transcription factor activity
XR_003947846.1	NM_011306.4	-0.804961	0.001586	uncharacterized LOC115487097	NC_000067.7:67050251-67060010	retinoid X receptor beta%2C transcript variant 2	NC_000083.7:34250785-34257377	20182	Rxrb	GO:0003700	DNA binding transcription factor activity
XR_003947846.1	NM_017406.4	0.712137	0.009368	uncharacterized LOC115487097	NC_000067.7:67050251-67060010	activating transcription factor 6 beta	NC_000083.7:34866119-34874048	12915	Atf6b	GO:0003700	DNA binding transcription factor activity
XR_003947846.1	NM_001374803.1	0.722583	0.00794	uncharacterized LOC115487097	NC_000067.7:67050251-67060010	nuclear transcription factor-Y alpha%2C transcript variant 5	NC_000083.7:48693912-48716782	18044	Nfya	GO:0003700	DNA binding transcription factor activity
XR_003947846.1	NM_001357447.1	0.738479	0.006088	uncharacterized LOC115487097	NC_000067.7:67050251-67060010	zinc finger protein 24%2C transcript variant 2	NC_000084.7:24142773-24153427	59057	Zfp24	GO:0003700	DNA binding transcription factor activity
XR_003947846.1	XM_036160990.1	-0.778058	0.002882	uncharacterized LOC115487097	NC_000067.7:67050251-67060010	nuclear receptor subfamily 3%2C group C%2C member 1%2C transcript variant X11	NC_000084.7:39545017-39623464	14815	Nr3c1	GO:0003700	DNA binding transcription factor activity
XR_003947846.1	TCONS_00024625	0.750828	0.00489	uncharacterized LOC115487097	NC_000067.7:67050251-67060010	TCONS_00024625	NC_000085.7:8749885-8763680	225895	Taf6l	GO:0003700	DNA binding transcription factor activity
XR_003947846.1	NM_013476.4	0.822702	0.001016	uncharacterized LOC115487097	NC_000067.7:67050251-67060010	androgen receptor	NC_000086.8:97192362-97366824	11835	Ar	GO:0003700	DNA binding transcription factor activity
XR_003947846.1	NM_018789.2	0.783965	0.002545	uncharacterized LOC115487097	NC_000067.7:67050251-67060010	forkhead box O4	NC_000086.8:100298133-100304479	54601	Foxo4	GO:0003700	DNA binding transcription factor activity
XR_004936153.1	NM_001136073.2	0.718656	0.008456	uncharacterized LOC118567748	NC_000067.7:68702609-68731213	nuclear factor of activated T cells%2C cytoplasmic%2C calcineurin dependent 2%2C transcript variant 4	NC_000068.8:168318329-168432285	18019	Nfatc2	GO:0003700	DNA binding transcription factor activity
XR_004936153.1	NM_012051.4	0.708684	0.009879	uncharacterized LOC118567748	NC_000067.7:68702609-68731213	ets variant 3%2C transcript variant 3	NC_000069.7:87432884-87447465	27049	Etv3	GO:0003700	DNA binding transcription factor activity
XR_004936153.1	NM_015743.3	0.74179	0.005747	uncharacterized LOC118567748	NC_000067.7:68702609-68731213	nuclear receptor subfamily 4%2C group A%2C member 3%2C transcript variant 1	NC_000070.7:48045304-48086446	18124	Nr4a3	GO:0003700	DNA binding transcription factor activity
XR_004936153.1	XM_030253752.2	0.713647	0.00915	uncharacterized LOC118567748	NC_000067.7:68702609-68731213	arginine glutamic acid dipeptide (RE) repeats%2C transcript variant X16	NC_000070.7:150561931-150706423	68703	Rere	GO:0003700	DNA binding transcription factor activity
XR_004936153.1	NM_053242.4	0.791516	0.00216	uncharacterized LOC118567748	NC_000067.7:68702609-68731213	forkhead box P2%2C transcript variant 1	NC_000072.7:14901347-15441976	114142	Foxp2	GO:0003700	DNA binding transcription factor activity
XR_004936153.1	NM_001252601.1	-0.71095	0.009541	uncharacterized LOC118567748	NC_000067.7:68702609-68731213	interferon regulatory factor 7%2C transcript variant 3	NC_000073.7:140843095-140846337	54123	Irf7	GO:0003700	DNA binding transcription factor activity
XR_004936153.1	NM_001256044.1	0.769092	0.003456	uncharacterized LOC118567748	NC_000067.7:68702609-68731213	heat shock transcription factor 4%2C transcript variant 3	NC_000074.7:105996432-106002477	26386	Hsf4	GO:0003700	DNA binding transcription factor activity
XR_004936153.1	NM_194263.2	0.70891	0.009845	uncharacterized LOC118567748	NC_000067.7:68702609-68731213	T-box 20%2C transcript variant 1	NC_000075.7:24632107-24685599	57246	Tbx20	GO:0003700	DNA binding transcription factor activity
XR_004936153.1	NM_008297.3	0.857621	0.000361	uncharacterized LOC118567748	NC_000067.7:68702609-68731213	heat shock factor 2	NC_000076.7:57362480-57389239	15500	Hsf2	GO:0003700	DNA binding transcription factor activity
XR_004936153.1	NM_133208.3	-0.793993	0.002044	uncharacterized LOC118567748	NC_000067.7:68702609-68731213	zinc finger protein 287%2C transcript variant 1	NC_000077.7:62602311-62622722	170740	Zfp287	GO:0003700	DNA binding transcription factor activity
XR_004936153.1	TCONS_00015936	0.770429	0.003365	uncharacterized LOC118567748	NC_000067.7:68702609-68731213	TCONS_00015936	NC_000077.7:98632710-98659832	21833	Thra	GO:0003700	DNA binding transcription factor activity
XR_004936153.1	NM_213659.3	0.723237	0.007856	uncharacterized LOC118567748	NC_000067.7:68702609-68731213	signal transducer and activator of transcription 3%2C transcript variant 1	NC_000077.7:100777631-100830366	20848	Stat3	GO:0003700	DNA binding transcription factor activity
XR_004936153.1	NM_009045.5	0.727795	0.007292	uncharacterized LOC118567748	NC_000067.7:68702609-68731213	v-rel reticuloendotheliosis viral oncogene homolog A (avian)%2C transcript variant 1	NC_000085.7:5687568-5698162	19697	Rela	GO:0003700	DNA binding transcription factor activity
XR_003948681.2	XM_030252077.2	0.712106	0.009372	predicted gene%2C 51744	NC_000067.7:68970103-68995798	nuclear receptor coactivator 2%2C transcript variant X11	NC_000067.7:13212641-13364673	17978	Ncoa2	GO:0000988	transcription factor activity, protein binding
XR_003948681.2	TCONS_00000136	0.81169	0.001347	predicted gene%2C 51744	NC_000067.7:68970103-68995798	TCONS_00000136	NC_000067.7:52155808-52201024	20846	Stat1	GO:0003700	DNA binding transcription factor activity
XR_003948681.2	XM_006497165.5	0.731226	0.006888	predicted gene%2C 51744	NC_000067.7:68970103-68995798	estrogen-related receptor gamma%2C transcript variant X10	NC_000067.7:187340706-187947081	26381	Esrrg	GO:0003700	DNA binding transcription factor activity
XR_003948681.2	NM_178778.3	0.804407	0.001607	predicted gene%2C 51744	NC_000067.7:68970103-68995798	suppressor of cancer cell invasion	NC_000068.8:38956225-39080742	320271	Scai	GO:0000988	transcription factor activity, protein binding
XR_003948681.2	NM_001284371.1	0.827217	0.0009	predicted gene%2C 51744	NC_000067.7:68970103-68995798	activating transcription factor 2%2C transcript variant 6	NC_000068.8:73656690-73722983	11909	Atf2	GO:0003700	DNA binding transcription factor activity
XR_003948681.2	XM_006502031.4	0.819098	0.001116	predicted gene%2C 51744	NC_000067.7:68970103-68995798	E74-like factor 2%2C transcript variant X4	NC_000069.7:51162705-51247925	69257	Elf2	GO:0003700	DNA binding transcription factor activity
XR_003948681.2	NM_009822.3	0.721739	0.008049	predicted gene%2C 51744	NC_000067.7:68970103-68995798	RUNX1 translocation partner 1%2C transcript variant 3	NC_000070.7:13784781-13895056	12395	Runx1t1	GO:0003700	DNA binding transcription factor activity
XR_003948681.2	XM_006539136.5	0.702863	0.010788	predicted gene%2C 51744	NC_000067.7:68970103-68995798	arginine glutamic acid dipeptide (RE) repeats%2C transcript variant X1	NC_000070.7:150365371-150706423	68703	Rere	GO:0003700	DNA binding transcription factor activity
XR_003948681.2	XM_030253752.2	0.756966	0.004366	predicted gene%2C 51744	NC_000067.7:68970103-68995798	arginine glutamic acid dipeptide (RE) repeats%2C transcript variant X16	NC_000070.7:150561931-150706423	68703	Rere	GO:0003700	DNA binding transcription factor activity
XR_003948681.2	NM_212435.1	0.764607	0.003774	predicted gene%2C 51744	NC_000067.7:68970103-68995798	forkhead box P2%2C transcript variant 2	NC_000072.7:15185504-15441976	114142	Foxp2	GO:0003700	DNA binding transcription factor activity
XR_003948681.2	XM_006505322.1	0.779558	0.002793	predicted gene%2C 51744	NC_000067.7:68970103-68995798	forkhead box P1%2C transcript variant X34	NC_000072.7:98902302-99005875	108655	Foxp1	GO:0003700	DNA binding transcription factor activity
XR_003948681.2	XM_006505320.4	0.859993	0.000333	predicted gene%2C 51744	NC_000067.7:68970103-68995798	forkhead box P1%2C transcript variant X29	NC_000072.7:98902302-99030079	108655	Foxp1	GO:0003700	DNA binding transcription factor activity
XR_003948681.2	NM_053202.2	0.704263	0.010564	predicted gene%2C 51744	NC_000067.7:68970103-68995798	forkhead box P1%2C transcript variant 1	NC_000072.7:98902302-99412306	108655	Foxp1	GO:0003700	DNA binding transcription factor activity
XR_003948681.2	NM_021899.3	0.705806	0.010321	predicted gene%2C 51744	NC_000067.7:68970103-68995798	forkhead box J2	NC_000072.7:122797142-122822325	60611	Foxj2	GO:0003700	DNA binding transcription factor activity
XR_003948681.2	NM_177687.3	0.770492	0.003361	predicted gene%2C 51744	NC_000067.7:68970103-68995798	cAMP responsive element binding protein-like 2	NC_000072.7:134807161-134834846	232430	Crebl2	GO:0003700	DNA binding transcription factor activity
XR_003948681.2	XM_011250460.4	0.72239	0.007965	predicted gene%2C 51744	NC_000067.7:68970103-68995798	avian reticuloendotheliosis viral (v-rel) oncogene related B%2C transcript variant X4	NC_000073.7:19340141-19360634	19698	Relb	GO:0003700	DNA binding transcription factor activity
XR_003948681.2	XM_006530576.5	0.717521	0.00861	predicted gene%2C 51744	NC_000067.7:68970103-68995798	nuclear receptor subfamily 3%2C group C%2C member 2%2C transcript variant X4	NC_000074.7:77628124-77970639	110784	Nr3c2	GO:0003700	DNA binding transcription factor activity
XR_003948681.2	NM_001033161.2	0.724107	0.007746	predicted gene%2C 51744	NC_000067.7:68970103-68995798	TNFRSF1A-associated via death domain	NC_000074.7:105985206-105991226	71609	Tradd	GO:0003700	DNA binding transcription factor activity
XR_003948681.2	TCONS_00011736	0.837603	0.000673	predicted gene%2C 51744	NC_000067.7:68970103-68995798	TCONS_00011736	NC_000074.7:108020101-108106142	54446	Nfat5	GO:0003700	DNA binding transcription factor activity
XR_003948681.2	NM_013519.2	0.843042	0.000573	predicted gene%2C 51744	NC_000067.7:68970103-68995798	forkhead box C2	NC_000074.7:121842909-121845634	14234	Foxc2	GO:0003700	DNA binding transcription factor activity
XR_003948681.2	NM_194263.2	0.82579	0.000936	predicted gene%2C 51744	NC_000067.7:68970103-68995798	T-box 20%2C transcript variant 1	NC_000075.7:24632107-24685599	57246	Tbx20	GO:0003700	DNA binding transcription factor activity
XR_003948681.2	NM_020496.3	0.842015	0.000591	predicted gene%2C 51744	NC_000067.7:68970103-68995798	T-box 20%2C transcript variant 2	NC_000075.7:24651543-24685599	57246	Tbx20	GO:0003700	DNA binding transcription factor activity
XR_003948681.2	XM_006512119.4	0.733441	0.006635	predicted gene%2C 51744	NC_000067.7:68970103-68995798	zinc finger protein 445%2C transcript variant X2	NC_000075.7:122677987-122715910	235682	Zfp445	GO:0003700	DNA binding transcription factor activity
XR_003948681.2	XM_036154922.1	0.704304	0.010558	predicted gene%2C 51744	NC_000067.7:68970103-68995798	zinc finger protein 445%2C transcript variant X8	NC_000075.7:122677987-122715910	235682	Zfp445	GO:0003700	DNA binding transcription factor activity
XR_003948681.2	NM_001376967.1	0.783677	0.002561	predicted gene%2C 51744	NC_000067.7:68970103-68995798	forkhead box O3%2C transcript variant 1	NC_000076.7:42057840-42152691	56484	Foxo3	GO:0003700	DNA binding transcription factor activity
XR_003948681.2	NM_008688.3	-0.768846	0.003473	predicted gene%2C 51744	NC_000067.7:68970103-68995798	nuclear factor I/C%2C transcript variant 1	NC_000076.7:81232024-81263007	18029	Nfic	GO:0003700	DNA binding transcription factor activity
XR_003948681.2	NM_172941.4	0.715346	0.00891	predicted gene%2C 51744	NC_000067.7:68970103-68995798	zinc finger with KRAB and SCAN domains 17%2C transcript variant 1	NC_000077.7:59376345-59397466	268417	Zkscan17	GO:0003700	DNA binding transcription factor activity
XR_003948681.2	NM_009324.2	0.760246	0.004104	predicted gene%2C 51744	NC_000067.7:68970103-68995798	T-box 2	NC_000077.7:85723440-85732774	21385	Tbx2	GO:0003700	DNA binding transcription factor activity
XR_003948681.2	NM_001313983.1	0.851219	0.000445	predicted gene%2C 51744	NC_000067.7:68970103-68995798	thyroid hormone receptor alpha%2C transcript variant 1	NC_000077.7:98632610-98659832	21833	Thra	GO:0003700	DNA binding transcription factor activity
XR_003948681.2	TCONS_00015936	0.896643	7.8e-05	predicted gene%2C 51744	NC_000067.7:68970103-68995798	TCONS_00015936	NC_000077.7:98632710-98659832	21833	Thra	GO:0003700	DNA binding transcription factor activity
XR_003948681.2	NM_007840.3	0.75767	0.004309	predicted gene%2C 51744	NC_000067.7:68970103-68995798	DEAD box helicase 5	NC_000077.7:106671181-106679320	13207	Ddx5	GO:0000988	transcription factor activity, protein binding
XR_003948681.2	NM_030887.2	-0.746861	0.005254	predicted gene%2C 51744	NC_000067.7:68970103-68995798	Jun dimerization protein 2%2C transcript variant 1	NC_000078.7:85646189-85686652	81703	Jdp2	GO:0003700	DNA binding transcription factor activity
XR_003948681.2	XM_036157614.1	0.755711	0.004469	predicted gene%2C 51744	NC_000067.7:68970103-68995798	forkhead box N3%2C transcript variant X6	NC_000078.7:99156339-99358328	71375	Foxn3	GO:0003700	DNA binding transcription factor activity
XR_003948681.2	NM_001039115.2	0.758878	0.004212	predicted gene%2C 51744	NC_000067.7:68970103-68995798	zinc finger with KRAB and SCAN domains 4	NC_000079.7:21663018-21669677	544922	Zkscan4	GO:0003700	DNA binding transcription factor activity
XR_003948681.2	NM_001359994.1	0.775803	0.003019	predicted gene%2C 51744	NC_000067.7:68970103-68995798	E2F transcription factor 3%2C transcript variant 3	NC_000079.7:30090557-30168374	13557	E2f3	GO:0003700	DNA binding transcription factor activity
XR_003948681.2	NM_029315.1	0.749958	0.004968	predicted gene%2C 51744	NC_000067.7:68970103-68995798	POU domain class 5%2C transcription factor 2	NC_000079.7:78173020-78174415	75507	Pou5f2	GO:0003700	DNA binding transcription factor activity
XR_003948681.2	NM_023699.3	0.789672	0.00225	predicted gene%2C 51744	NC_000067.7:68970103-68995798	nuclear factor of activated T cells%2C cytoplasmic%2C calcineurin dependent 4%2C transcript variant 1	NC_000080.7:56062251-56071400	73181	Nfatc4	GO:0003700	DNA binding transcription factor activity
XR_003948681.2	TCONS_00019973	0.921696	2e-05	predicted gene%2C 51744	NC_000067.7:68970103-68995798	TCONS_00019973	NC_000080.7:63436369-63506854	14463	Gata4	GO:0003700	DNA binding transcription factor activity
XR_003948681.2	NM_001113418.1	0.760547	0.00408	predicted gene%2C 51744	NC_000067.7:68970103-68995798	peroxisome proliferator activated receptor alpha%2C transcript variant 2	NC_000081.7:85619764-85691052	19013	Ppara	GO:0003700	DNA binding transcription factor activity
XR_003948681.2	NM_023794.2	0.714909	0.008972	predicted gene%2C 51744	NC_000067.7:68970103-68995798	ets variant 5%2C transcript variant 2	NC_000082.7:22200062-22258320	104156	Etv5	GO:0003700	DNA binding transcription factor activity
XR_003948681.2	NM_011145.3	-0.744458	0.005484	predicted gene%2C 51744	NC_000067.7:68970103-68995798	peroxisome proliferator activator receptor delta	NC_000083.7:28451727-28520443	19015	Ppard	GO:0003700	DNA binding transcription factor activity
XR_003948681.2	NM_017463.3	0.896124	8e-05	predicted gene%2C 51744	NC_000067.7:68970103-68995798	pre B cell leukemia homeobox 2	NC_000083.7:34811232-34816374	18515	Pbx2	GO:0003700	DNA binding transcription factor activity
XR_003948681.2	NM_010258.3	0.84817	0.00049	predicted gene%2C 51744	NC_000067.7:68970103-68995798	GATA binding protein 6	NC_000084.7:11052509-11085635	14465	Gata6	GO:0003700	DNA binding transcription factor activity
XR_003948681.2	XM_006525699.4	0.754118	0.004604	predicted gene%2C 51744	NC_000067.7:68970103-68995798	SMAD family member 2%2C transcript variant X1	NC_000084.7:76375182-76444819	17126	Smad2	GO:0003700	DNA binding transcription factor activity
XR_003948681.2	XM_017318209.3	0.705915	0.010304	predicted gene%2C 51744	NC_000067.7:68970103-68995798	estrogen related receptor%2C alpha%2C transcript variant X3	NC_000085.7:6888344-6899182	26379	Esrra	GO:0003700	DNA binding transcription factor activity
XR_003948681.2	NM_030139.5	0.73131	0.006878	predicted gene%2C 51744	NC_000067.7:68970103-68995798	zinc finger protein 449%2C transcript variant 1	NC_000086.8:55391756-55411034	78619	Zfp449	GO:0003700	DNA binding transcription factor activity
TCONS_00000223	XM_036165240.1	-0.850271	0.000458	TCONS_00000223	NC_000067.7:72976018-72991903	estrogen-related receptor gamma%2C transcript variant X12	NC_000067.7:187340909-187947081	26381	Esrrg	GO:0003700	DNA binding transcription factor activity
TCONS_00000223	NM_007892.2	0.740396	0.005889	TCONS_00000223	NC_000067.7:72976018-72991903	E2F transcription factor 5	NC_000069.7:14643730-14671369	13559	E2f5	GO:0003700	DNA binding transcription factor activity
TCONS_00000223	XM_030253745.2	-0.703137	0.010744	TCONS_00000223	NC_000067.7:72976018-72991903	arginine glutamic acid dipeptide (RE) repeats%2C transcript variant X7	NC_000070.7:150452812-150706423	68703	Rere	GO:0003700	DNA binding transcription factor activity
TCONS_00000223	XM_030243410.2	0.715881	0.008836	TCONS_00000223	NC_000067.7:72976018-72991903	transcription factor Dp 1%2C transcript variant X18	NC_000074.7:13388763-13428448	21781	Tfdp1	GO:0003700	DNA binding transcription factor activity
TCONS_00000223	NM_177289.1	-0.739249	0.006008	TCONS_00000223	NC_000067.7:72976018-72991903	CBFA2/RUNX1 translocation partner 3%2C transcript variant 3	NC_000074.7:123351874-123404914	12398	Cbfa2t3	GO:0003700	DNA binding transcription factor activity
TCONS_00000223	XM_011248292.3	0.742872	0.005639	TCONS_00000223	NC_000067.7:72976018-72991903	CBFA2/RUNX1 translocation partner 3%2C transcript variant X6	NC_000074.7:123351876-123406073	12398	Cbfa2t3	GO:0003700	DNA binding transcription factor activity
TCONS_00000223	NM_016769.4	0.78918	0.002274	TCONS_00000223	NC_000067.7:72976018-72991903	SMAD family member 3	NC_000075.7:63554048-63665276	17127	Smad3	GO:0003700	DNA binding transcription factor activity
TCONS_00000223	TCONS_00013922	0.701148	0.011067	TCONS_00000223	NC_000067.7:72976018-72991903	TCONS_00013922	NC_000075.7:122677987-122695059	235682	Zfp445	GO:0003700	DNA binding transcription factor activity
TCONS_00000223	XM_006513335.4	-0.744195	0.005509	TCONS_00000223	NC_000067.7:72976018-72991903	nuclear factor I/C%2C transcript variant X1	NC_000076.7:81232024-81267753	18029	Nfic	GO:0003700	DNA binding transcription factor activity
TCONS_00000223	XM_011244956.3	-0.74353	0.005574	TCONS_00000223	NC_000067.7:72976018-72991903	GATA binding protein 4%2C transcript variant X1	NC_000080.7:63436369-63509161	14463	Gata4	GO:0003700	DNA binding transcription factor activity
TCONS_00000223	NM_001302153.1	-0.784015	0.002543	TCONS_00000223	NC_000067.7:72976018-72991903	ETS transcription factor%2C transcript variant 3	NC_000082.7:95160027-95260207	13876	Erg	GO:0003700	DNA binding transcription factor activity
TCONS_00000223	XM_006527111.3	-0.711812	0.009415	TCONS_00000223	NC_000067.7:72976018-72991903	estrogen related receptor%2C alpha%2C transcript variant X1	NC_000085.7:6888344-6899416	26379	Esrra	GO:0003700	DNA binding transcription factor activity
TCONS_00000223	XM_006528503.4	0.744185	0.00551	TCONS_00000223	NC_000067.7:72976018-72991903	TSC22 domain family%2C member 3%2C transcript variant X6	NC_000086.8:139440276-139443195	14605	Tsc22d3	GO:0003700	DNA binding transcription factor activity
TCONS_00000223	TCONS_00025632	0.766215	0.003657	TCONS_00000223	NC_000067.7:72976018-72991903	TCONS_00025632	NC_000086.8:139440276-139447588	14605	Tsc22d3	GO:0003700	DNA binding transcription factor activity
TCONS_00000224	XM_006503799.4	0.733028	0.006682	TCONS_00000224	NC_000067.7:72976018-72991903	recombination signal binding protein for immunoglobulin kappa J region%2C transcript variant X2	NC_000071.7:53748295-53814703	19664	Rbpj	GO:0003700	DNA binding transcription factor activity
TCONS_00000224	NM_001290436.1	0.806757	0.001519	TCONS_00000224	NC_000067.7:72976018-72991903	zinc finger and SCAN domain containing 22%2C transcript variant 1	NC_000073.7:12631735-12643010	232878	Zscan22	GO:0003700	DNA binding transcription factor activity
TCONS_00000224	NM_001371055.1	0.775599	0.003031	TCONS_00000224	NC_000067.7:72976018-72991903	nuclear factor I/X%2C transcript variant 8	NC_000074.7:85431340-85500039	18032	Nfix	GO:0003700	DNA binding transcription factor activity
TCONS_00000224	TCONS_00015933	0.729694	0.007066	TCONS_00000224	NC_000067.7:72976018-72991903	TCONS_00015933	NC_000077.7:98631538-98659832	21833	Thra	GO:0003700	DNA binding transcription factor activity
TCONS_00000224	NM_001110825.1	0.73753	0.006189	TCONS_00000224	NC_000067.7:72976018-72991903	forkhead box P4%2C transcript variant 2	NC_000083.7:48178057-48235557	74123	Foxp4	GO:0003700	DNA binding transcription factor activity
TCONS_00000224	NM_001379391.1	0.739096	0.006024	TCONS_00000224	NC_000067.7:72976018-72991903	metastasis associated 3%2C transcript variant 8	NC_000083.7:84013612-84122334	116871	Mta3	GO:0003700	DNA binding transcription factor activity
XR_001778985.3	NM_009952.2	0.748971	0.005058	predicted gene%2C 31047	NC_000067.7:72976018-72991903	cAMP responsive element binding protein 1%2C transcript variant B	NC_000067.7:64571962-64643707	12912	Creb1	GO:0003700	DNA binding transcription factor activity
XR_001778985.3	NM_178778.3	0.773878	0.00314	predicted gene%2C 31047	NC_000067.7:72976018-72991903	suppressor of cancer cell invasion	NC_000068.8:38956225-39080742	320271	Scai	GO:0000988	transcription factor activity, protein binding
XR_001778985.3	NM_001284371.1	0.706664	0.010188	predicted gene%2C 31047	NC_000067.7:72976018-72991903	activating transcription factor 2%2C transcript variant 6	NC_000068.8:73656690-73722983	11909	Atf2	GO:0003700	DNA binding transcription factor activity
XR_001778985.3	XM_006502031.4	0.854974	0.000394	predicted gene%2C 31047	NC_000067.7:72976018-72991903	E74-like factor 2%2C transcript variant X4	NC_000069.7:51162705-51247925	69257	Elf2	GO:0003700	DNA binding transcription factor activity
XR_001778985.3	XM_030253749.2	-0.74357	0.00557	predicted gene%2C 31047	NC_000067.7:72976018-72991903	arginine glutamic acid dipeptide (RE) repeats%2C transcript variant X11	NC_000070.7:150365371-150706423	68703	Rere	GO:0003700	DNA binding transcription factor activity
XR_001778985.3	NM_007961.4	0.771741	0.003278	predicted gene%2C 31047	NC_000067.7:72976018-72991903	ets variant 6%2C transcript variant 1	NC_000072.7:134012662-134247121	14011	Etv6	GO:0003700	DNA binding transcription factor activity
XR_001778985.3	TCONS_00010634	0.887253	0.000118	predicted gene%2C 31047	NC_000067.7:72976018-72991903	TCONS_00010634	NC_000073.7:45354455-45364631	56632	Sphk2	GO:0003700	DNA binding transcription factor activity
XR_001778985.3	NM_013519.2	0.818388	0.001137	predicted gene%2C 31047	NC_000067.7:72976018-72991903	forkhead box C2	NC_000074.7:121842909-121845634	14234	Foxc2	GO:0003700	DNA binding transcription factor activity
XR_001778985.3	NM_020496.3	0.764083	0.003812	predicted gene%2C 31047	NC_000067.7:72976018-72991903	T-box 20%2C transcript variant 2	NC_000075.7:24651543-24685599	57246	Tbx20	GO:0003700	DNA binding transcription factor activity
XR_001778985.3	NM_001376967.1	0.850828	0.00045	predicted gene%2C 31047	NC_000067.7:72976018-72991903	forkhead box O3%2C transcript variant 1	NC_000076.7:42057840-42152691	56484	Foxo3	GO:0003700	DNA binding transcription factor activity
XR_001778985.3	NM_172941.4	0.702768	0.010803	predicted gene%2C 31047	NC_000067.7:72976018-72991903	zinc finger with KRAB and SCAN domains 17%2C transcript variant 1	NC_000077.7:59376345-59397466	268417	Zkscan17	GO:0003700	DNA binding transcription factor activity
XR_001778985.3	NM_009324.2	0.714456	0.009035	predicted gene%2C 31047	NC_000067.7:72976018-72991903	T-box 2	NC_000077.7:85723440-85732774	21385	Tbx2	GO:0003700	DNA binding transcription factor activity
XR_001778985.3	NM_001313983.1	0.757488	0.004323	predicted gene%2C 31047	NC_000067.7:72976018-72991903	thyroid hormone receptor alpha%2C transcript variant 1	NC_000077.7:98632610-98659832	21833	Thra	GO:0003700	DNA binding transcription factor activity
XR_001778985.3	TCONS_00015936	0.818558	0.001132	predicted gene%2C 31047	NC_000067.7:72976018-72991903	TCONS_00015936	NC_000077.7:98632710-98659832	21833	Thra	GO:0003700	DNA binding transcription factor activity
XR_001778985.3	TCONS_00019973	0.879714	0.000162	predicted gene%2C 31047	NC_000067.7:72976018-72991903	TCONS_00019973	NC_000080.7:63436369-63506854	14463	Gata4	GO:0003700	DNA binding transcription factor activity
XR_001778985.3	NM_001113418.1	0.873509	0.000205	predicted gene%2C 31047	NC_000067.7:72976018-72991903	peroxisome proliferator activated receptor alpha%2C transcript variant 2	NC_000081.7:85619764-85691052	19013	Ppara	GO:0003700	DNA binding transcription factor activity
XR_001778985.3	NM_017463.3	0.702008	0.010927	predicted gene%2C 31047	NC_000067.7:72976018-72991903	pre B cell leukemia homeobox 2	NC_000083.7:34811232-34816374	18515	Pbx2	GO:0003700	DNA binding transcription factor activity
XR_001778985.3	NM_010258.3	0.703741	0.010647	predicted gene%2C 31047	NC_000067.7:72976018-72991903	GATA binding protein 6	NC_000084.7:11052509-11085635	14465	Gata6	GO:0003700	DNA binding transcription factor activity
XR_001778985.3	NM_001311070.1	0.74102	0.005825	predicted gene%2C 31047	NC_000067.7:72976018-72991903	SMAD family member 2%2C transcript variant 3	NC_000084.7:76395515-76444818	17126	Smad2	GO:0003700	DNA binding transcription factor activity
XR_373508.3	NM_001284370.1	0.756169	0.004431	predicted gene%2C 31137	NC_000067.7:73024006-73045187	activating transcription factor 2%2C transcript variant 5	NC_000068.8:73656690-73722983	11909	Atf2	GO:0003700	DNA binding transcription factor activity
XR_373508.3	NM_001284371.1	0.830829	0.000815	predicted gene%2C 31137	NC_000067.7:73024006-73045187	activating transcription factor 2%2C transcript variant 6	NC_000068.8:73656690-73722983	11909	Atf2	GO:0003700	DNA binding transcription factor activity
XR_373508.3	XM_006502031.4	0.743278	0.005599	predicted gene%2C 31137	NC_000067.7:73024006-73045187	E74-like factor 2%2C transcript variant X4	NC_000069.7:51162705-51247925	69257	Elf2	GO:0003700	DNA binding transcription factor activity
XR_373508.3	NM_178661.4	0.86987	0.000235	predicted gene%2C 31137	NC_000067.7:73024006-73045187	cAMP responsive element binding protein 3-like 2	NC_000072.7:37307955-37419083	208647	Creb3l2	GO:0003700	DNA binding transcription factor activity
XR_373508.3	XM_006505322.1	0.768025	0.00353	predicted gene%2C 31137	NC_000067.7:73024006-73045187	forkhead box P1%2C transcript variant X34	NC_000072.7:98902302-99005875	108655	Foxp1	GO:0003700	DNA binding transcription factor activity
XR_373508.3	XM_006505320.4	0.796218	0.001944	predicted gene%2C 31137	NC_000067.7:73024006-73045187	forkhead box P1%2C transcript variant X29	NC_000072.7:98902302-99030079	108655	Foxp1	GO:0003700	DNA binding transcription factor activity
XR_373508.3	NM_021899.3	0.796332	0.001938	predicted gene%2C 31137	NC_000067.7:73024006-73045187	forkhead box J2	NC_000072.7:122797142-122822325	60611	Foxj2	GO:0003700	DNA binding transcription factor activity
XR_373508.3	NM_194263.2	0.827445	0.000895	predicted gene%2C 31137	NC_000067.7:73024006-73045187	T-box 20%2C transcript variant 1	NC_000075.7:24632107-24685599	57246	Tbx20	GO:0003700	DNA binding transcription factor activity
XR_373508.3	NM_001376967.1	0.912846	3.4e-05	predicted gene%2C 31137	NC_000067.7:73024006-73045187	forkhead box O3%2C transcript variant 1	NC_000076.7:42057840-42152691	56484	Foxo3	GO:0003700	DNA binding transcription factor activity
XR_373508.3	NM_008688.3	-0.930679	1.1e-05	predicted gene%2C 31137	NC_000067.7:73024006-73045187	nuclear factor I/C%2C transcript variant 1	NC_000076.7:81232024-81263007	18029	Nfic	GO:0003700	DNA binding transcription factor activity
XR_373508.3	NM_009324.2	0.927876	1.4e-05	predicted gene%2C 31137	NC_000067.7:73024006-73045187	T-box 2	NC_000077.7:85723440-85732774	21385	Tbx2	GO:0003700	DNA binding transcription factor activity
XR_373508.3	NM_001313983.1	0.875566	0.00019	predicted gene%2C 31137	NC_000067.7:73024006-73045187	thyroid hormone receptor alpha%2C transcript variant 1	NC_000077.7:98632610-98659832	21833	Thra	GO:0003700	DNA binding transcription factor activity
XR_373508.3	TCONS_00015936	0.835381	0.000717	predicted gene%2C 31137	NC_000067.7:73024006-73045187	TCONS_00015936	NC_000077.7:98632710-98659832	21833	Thra	GO:0003700	DNA binding transcription factor activity
XR_373508.3	NM_007840.3	0.724592	0.007685	predicted gene%2C 31137	NC_000067.7:73024006-73045187	DEAD box helicase 5	NC_000077.7:106671181-106679320	13207	Ddx5	GO:0000988	transcription factor activity, protein binding
XR_373508.3	NM_030887.2	-0.744039	0.005524	predicted gene%2C 31137	NC_000067.7:73024006-73045187	Jun dimerization protein 2%2C transcript variant 1	NC_000078.7:85646189-85686652	81703	Jdp2	GO:0003700	DNA binding transcription factor activity
XR_373508.3	XM_006516240.3	-0.734911	0.006472	predicted gene%2C 31137	NC_000067.7:73024006-73045187	forkhead box N3%2C transcript variant X16	NC_000078.7:99156339-99359331	71375	Foxn3	GO:0003700	DNA binding transcription factor activity
XR_373508.3	NM_023699.3	0.848711	0.000481	predicted gene%2C 31137	NC_000067.7:73024006-73045187	nuclear factor of activated T cells%2C cytoplasmic%2C calcineurin dependent 4%2C transcript variant 1	NC_000080.7:56062251-56071400	73181	Nfatc4	GO:0003700	DNA binding transcription factor activity
XR_373508.3	TCONS_00019973	0.839438	0.000638	predicted gene%2C 31137	NC_000067.7:73024006-73045187	TCONS_00019973	NC_000080.7:63436369-63506854	14463	Gata4	GO:0003700	DNA binding transcription factor activity
XR_373508.3	NM_023794.2	0.748417	0.005109	predicted gene%2C 31137	NC_000067.7:73024006-73045187	ets variant 5%2C transcript variant 2	NC_000082.7:22200062-22258320	104156	Etv5	GO:0003700	DNA binding transcription factor activity
XR_373508.3	NM_017463.3	0.827732	0.000888	predicted gene%2C 31137	NC_000067.7:73024006-73045187	pre B cell leukemia homeobox 2	NC_000083.7:34811232-34816374	18515	Pbx2	GO:0003700	DNA binding transcription factor activity
XR_373508.3	NM_010258.3	0.882452	0.000145	predicted gene%2C 31137	NC_000067.7:73024006-73045187	GATA binding protein 6	NC_000084.7:11052509-11085635	14465	Gata6	GO:0003700	DNA binding transcription factor activity
XR_373508.3	XM_006525660.4	-0.712043	0.009381	predicted gene%2C 31137	NC_000067.7:73024006-73045187	nuclear receptor subfamily 3%2C group C%2C member 1%2C transcript variant X3	NC_000084.7:39545027-39622485	14815	Nr3c1	GO:0003700	DNA binding transcription factor activity
XR_373508.3	NM_001311070.1	0.770324	0.003372	predicted gene%2C 31137	NC_000067.7:73024006-73045187	SMAD family member 2%2C transcript variant 3	NC_000084.7:76395515-76444818	17126	Smad2	GO:0003700	DNA binding transcription factor activity
XR_373508.3	XM_017318209.3	0.707101	0.01012	predicted gene%2C 31137	NC_000067.7:73024006-73045187	estrogen related receptor%2C alpha%2C transcript variant X3	NC_000085.7:6888344-6899182	26379	Esrra	GO:0003700	DNA binding transcription factor activity
NR_038002.1	XM_030252077.2	0.726571	0.00744	RIKEN cDNA 1700027A15 gene%2C transcript variant 1	NC_000067.7:73063744-73064667	nuclear receptor coactivator 2%2C transcript variant X11	NC_000067.7:13212641-13364673	17978	Ncoa2	GO:0000988	transcription factor activity, protein binding
NR_038002.1	NM_001081304.1	0.779106	0.00282	RIKEN cDNA 1700027A15 gene%2C transcript variant 1	NC_000067.7:73063744-73064667	activating transcription factor 6	NC_000067.7:170532025-170695340	226641	Atf6	GO:0003700	DNA binding transcription factor activity
NR_038002.1	NM_007498.3	0.773995	0.003132	RIKEN cDNA 1700027A15 gene%2C transcript variant 1	NC_000067.7:73063744-73064667	activating transcription factor 3	NC_000067.7:190902492-190915530	11910	Atf3	GO:0003700	DNA binding transcription factor activity
NR_038002.1	NM_178778.3	0.71028	0.00964	RIKEN cDNA 1700027A15 gene%2C transcript variant 1	NC_000067.7:73063744-73064667	suppressor of cancer cell invasion	NC_000068.8:38956225-39080742	320271	Scai	GO:0000988	transcription factor activity, protein binding
NR_038002.1	XM_036157712.1	0.790789	0.002195	RIKEN cDNA 1700027A15 gene%2C transcript variant 1	NC_000067.7:73063744-73064667	activating transcription factor 2%2C transcript variant X21	NC_000068.8:73646861-73722908	11909	Atf2	GO:0003700	DNA binding transcription factor activity
NR_038002.1	XM_036157713.1	0.735852	0.006369	RIKEN cDNA 1700027A15 gene%2C transcript variant 1	NC_000067.7:73063744-73064667	activating transcription factor 2%2C transcript variant X23	NC_000068.8:73660896-73722972	11909	Atf2	GO:0003700	DNA binding transcription factor activity
NR_038002.1	NM_013497.4	0.7055	0.010369	RIKEN cDNA 1700027A15 gene%2C transcript variant 1	NC_000067.7:73063744-73064667	cAMP responsive element binding protein 3	NC_000070.7:43562657-43567061	12913	Creb3	GO:0003700	DNA binding transcription factor activity
NR_038002.1	NM_001290696.1	0.725441	0.00758	RIKEN cDNA 1700027A15 gene%2C transcript variant 1	NC_000067.7:73063744-73064667	forkhead box J3%2C transcript variant 2	NC_000070.7:119396857-119486316	230700	Foxj3	GO:0003700	DNA binding transcription factor activity
NR_038002.1	XM_006504628.4	0.719631	0.008326	RIKEN cDNA 1700027A15 gene%2C transcript variant 1	NC_000067.7:73063744-73064667	zinc finger with KRAB and SCAN domains 1%2C transcript variant X1	NC_000071.7:138083311-138106084	74570	Zkscan1	GO:0003700	DNA binding transcription factor activity
NR_038002.1	NM_199068.2	0.816537	0.001192	RIKEN cDNA 1700027A15 gene%2C transcript variant 1	NC_000067.7:73063744-73064667	forkhead box K1	NC_000071.7:142387251-142447770	17425	Foxk1	GO:0003700	DNA binding transcription factor activity
NR_038002.1	NM_016683.2	0.749093	0.005047	RIKEN cDNA 1700027A15 gene%2C transcript variant 1	NC_000067.7:73063744-73064667	zinc finger with KRAB and SCAN domains 5%2C transcript variant 1	NC_000071.7:145141368-145158560	22757	Zkscan5	GO:0003700	DNA binding transcription factor activity
NR_038002.1	XM_006505906.5	0.735989	0.006354	RIKEN cDNA 1700027A15 gene%2C transcript variant 1	NC_000067.7:73063744-73064667	nuclear receptor subfamily 2%2C group C%2C member 2%2C transcript variant X4	NC_000072.7:92068483-92148962	22026	Nr2c2	GO:0003700	DNA binding transcription factor activity
NR_038002.1	XM_006505320.4	0.732337	0.00676	RIKEN cDNA 1700027A15 gene%2C transcript variant 1	NC_000067.7:73063744-73064667	forkhead box P1%2C transcript variant X29	NC_000072.7:98902302-99030079	108655	Foxp1	GO:0003700	DNA binding transcription factor activity
NR_038002.1	TCONS_00009475	0.736349	0.006315	RIKEN cDNA 1700027A15 gene%2C transcript variant 1	NC_000067.7:73063744-73064667	TCONS_00009475	NC_000073.7:12531329-12532991	232875	Zscan18	GO:0003700	DNA binding transcription factor activity
NR_038002.1	NM_022981.5	0.750101	0.004955	RIKEN cDNA 1700027A15 gene%2C transcript variant 1	NC_000067.7:73063744-73064667	zinc finger protein 110%2C transcript variant 2	NC_000073.7:12568687-12584513	65020	Zfp110	GO:0003700	DNA binding transcription factor activity
NR_038002.1	TCONS_00010406	0.719313	0.008368	RIKEN cDNA 1700027A15 gene%2C transcript variant 1	NC_000067.7:73063744-73064667	TCONS_00010406	NC_000073.7:19339987-19354009	19698	Relb	GO:0003700	DNA binding transcription factor activity
NR_038002.1	TCONS_00010633	0.766229	0.003656	RIKEN cDNA 1700027A15 gene%2C transcript variant 1	NC_000067.7:73063744-73064667	TCONS_00010633	NC_000073.7:45354305-45370301	56632	Sphk2	GO:0003700	DNA binding transcription factor activity
NR_038002.1	XM_036153751.1	0.742496	0.005677	RIKEN cDNA 1700027A15 gene%2C transcript variant 1	NC_000067.7:73063744-73064667	nuclear receptor subfamily 2%2C group F%2C member 6%2C transcript variant X3	NC_000074.7:71826761-71834662	13864	Nr2f6	GO:0003700	DNA binding transcription factor activity
NR_038002.1	TCONS_00011736	0.801913	0.001704	RIKEN cDNA 1700027A15 gene%2C transcript variant 1	NC_000067.7:73063744-73064667	TCONS_00011736	NC_000074.7:108020101-108106142	54446	Nfat5	GO:0003700	DNA binding transcription factor activity
NR_038002.1	NM_194263.2	0.850394	0.000457	RIKEN cDNA 1700027A15 gene%2C transcript variant 1	NC_000067.7:73063744-73064667	T-box 20%2C transcript variant 1	NC_000075.7:24632107-24685599	57246	Tbx20	GO:0003700	DNA binding transcription factor activity
NR_038002.1	NM_020496.3	0.776259	0.002991	RIKEN cDNA 1700027A15 gene%2C transcript variant 1	NC_000067.7:73063744-73064667	T-box 20%2C transcript variant 2	NC_000075.7:24651543-24685599	57246	Tbx20	GO:0003700	DNA binding transcription factor activity
NR_038002.1	NM_001355676.1	0.843469	0.000566	RIKEN cDNA 1700027A15 gene%2C transcript variant 1	NC_000067.7:73063744-73064667	DEAD box helicase 5%2C transcript variant 2	NC_000077.7:106671180-106679733	13207	Ddx5	GO:0000988	transcription factor activity, protein binding
NR_038002.1	NM_007840.3	0.770139	0.003385	RIKEN cDNA 1700027A15 gene%2C transcript variant 1	NC_000067.7:73063744-73064667	DEAD box helicase 5	NC_000077.7:106671181-106679320	13207	Ddx5	GO:0000988	transcription factor activity, protein binding
NR_038002.1	NM_001039115.2	0.732249	0.00677	RIKEN cDNA 1700027A15 gene%2C transcript variant 1	NC_000067.7:73063744-73064667	zinc finger with KRAB and SCAN domains 4	NC_000079.7:21663018-21669677	544922	Zkscan4	GO:0003700	DNA binding transcription factor activity
NR_038002.1	NM_001251833.1	-0.723543	0.007818	RIKEN cDNA 1700027A15 gene%2C transcript variant 1	NC_000067.7:73063744-73064667	zinc finger with KRAB and SCAN domains 8%2C transcript variant 2	NC_000079.7:21697390-21715284	93681	Zkscan8	GO:0003700	DNA binding transcription factor activity
NR_038002.1	TCONS_00019973	0.754365	0.004583	RIKEN cDNA 1700027A15 gene%2C transcript variant 1	NC_000067.7:73063744-73064667	TCONS_00019973	NC_000080.7:63436369-63506854	14463	Gata4	GO:0003700	DNA binding transcription factor activity
NR_038002.1	NM_032000.2	0.737839	0.006156	RIKEN cDNA 1700027A15 gene%2C transcript variant 1	NC_000067.7:73063744-73064667	transcriptional repressor GATA binding 1%2C transcript variant 2	NC_000081.7:50518152-50753437	83925	Trps1	GO:0003700	DNA binding transcription factor activity
NR_038002.1	TCONS_00020420	0.914664	3.1e-05	RIKEN cDNA 1700027A15 gene%2C transcript variant 1	NC_000067.7:73063744-73064667	TCONS_00020420	NC_000081.7:81686912-81711064	21685	Tef	GO:0003700	DNA binding transcription factor activity
NR_038002.1	TCONS_00020421	0.813949	0.001273	RIKEN cDNA 1700027A15 gene%2C transcript variant 1	NC_000067.7:73063744-73064667	TCONS_00020421	NC_000081.7:81686915-81711064	21685	Tef	GO:0003700	DNA binding transcription factor activity
NR_038002.1	XM_006520352.5	0.849595	0.000468	RIKEN cDNA 1700027A15 gene%2C transcript variant 1	NC_000067.7:73063744-73064667	activating transcription factor 1%2C transcript variant X2	NC_000081.7:100126749-100159129	11908	Atf1	GO:0003700	DNA binding transcription factor activity
NR_038002.1	XM_017316436.3	0.719618	0.008327	RIKEN cDNA 1700027A15 gene%2C transcript variant 1	NC_000067.7:73063744-73064667	nuclear receptor subfamily 4%2C group A%2C member 1%2C transcript variant X3	NC_000081.7:101155260-101172676	15370	Nr4a1	GO:0003700	DNA binding transcription factor activity
NR_038002.1	NM_148924.3	0.792448	0.002116	RIKEN cDNA 1700027A15 gene%2C transcript variant 1	NC_000067.7:73063744-73064667	zinc finger protein 263	NC_000082.7:3561962-3568652	74120	Zfp263	GO:0003700	DNA binding transcription factor activity
NR_038002.1	NM_017463.3	0.712523	0.009312	RIKEN cDNA 1700027A15 gene%2C transcript variant 1	NC_000067.7:73063744-73064667	pre B cell leukemia homeobox 2	NC_000083.7:34811232-34816374	18515	Pbx2	GO:0003700	DNA binding transcription factor activity
NR_038002.1	NM_001357448.1	0.707568	0.010049	RIKEN cDNA 1700027A15 gene%2C transcript variant 1	NC_000067.7:73063744-73064667	zinc finger protein 24%2C transcript variant 3	NC_000084.7:24142773-24153427	59057	Zfp24	GO:0003700	DNA binding transcription factor activity
NR_038002.1	NM_021559.3	-0.736022	0.006351	RIKEN cDNA 1700027A15 gene%2C transcript variant 1	NC_000067.7:73063744-73064667	zinc finger protein 24%2C transcript variant 1	NC_000084.7:24142773-24153870	59057	Zfp24	GO:0003700	DNA binding transcription factor activity
NR_038002.1	NM_001164110.1	0.75961	0.004154	RIKEN cDNA 1700027A15 gene%2C transcript variant 1	NC_000067.7:73063744-73064667	nuclear factor of activated T cells%2C cytoplasmic%2C calcineurin dependent 1%2C transcript variant 4	NC_000084.7:80649419-80756286	18018	Nfatc1	GO:0003700	DNA binding transcription factor activity
NR_038002.1	NM_001164109.1	0.727694	0.007304	RIKEN cDNA 1700027A15 gene%2C transcript variant 1	NC_000067.7:73063744-73064667	nuclear factor of activated T cells%2C cytoplasmic%2C calcineurin dependent 1%2C transcript variant 3	NC_000084.7:80690649-80756286	18018	Nfatc1	GO:0003700	DNA binding transcription factor activity
NR_038002.1	NM_019408.3	0.714542	0.009023	RIKEN cDNA 1700027A15 gene%2C transcript variant 1	NC_000067.7:73063744-73064667	nuclear factor of kappa light polypeptide gene enhancer in B cells 2%2C p49/p100%2C transcript variant 1	NC_000085.7:46294133-46300529	18034	Nfkb2	GO:0003700	DNA binding transcription factor activity
NR_038002.1	TCONS_00025637	0.754818	0.004544	RIKEN cDNA 1700027A15 gene%2C transcript variant 1	NC_000067.7:73063744-73064667	TCONS_00025637	NC_000086.8:139474353-139499523	14605	Tsc22d3	GO:0003700	DNA binding transcription factor activity
XR_004936173.1	XM_030252077.2	0.740304	0.005899	uncharacterized LOC118567752	NC_000067.7:73152579-73158685	nuclear receptor coactivator 2%2C transcript variant X11	NC_000067.7:13212641-13364673	17978	Ncoa2	GO:0000988	transcription factor activity, protein binding
XR_004936173.1	NM_001159731.1	0.722075	0.008005	uncharacterized LOC118567752	NC_000067.7:73152579-73158685	retinoid X receptor gamma%2C transcript variant 2	NC_000067.7:167445833-167467192	20183	Rxrg	GO:0003700	DNA binding transcription factor activity
XR_004936173.1	NM_178778.3	0.730173	0.00701	uncharacterized LOC118567752	NC_000067.7:73152579-73158685	suppressor of cancer cell invasion	NC_000068.8:38956225-39080742	320271	Scai	GO:0000988	transcription factor activity, protein binding
XR_004936173.1	XM_006499689.3	0.705053	0.010439	uncharacterized LOC118567752	NC_000067.7:73152579-73158685	MAX gene associated%2C transcript variant X3	NC_000068.8:119702993-119800610	29808	Mga	GO:0003700	DNA binding transcription factor activity
XR_004936173.1	NM_010226.2	0.723987	0.007761	uncharacterized LOC118567752	NC_000067.7:73152579-73158685	forkhead box S1	NC_000068.8:152773817-152775128	14239	Foxs1	GO:0003700	DNA binding transcription factor activity
XR_004936173.1	NM_019739.3	0.728139	0.007251	uncharacterized LOC118567752	NC_000067.7:73152579-73158685	forkhead box O1	NC_000069.7:52175757-52257530	56458	Foxo1	GO:0003700	DNA binding transcription factor activity
XR_004936173.1	NM_019995.4	-0.782367	0.002633	uncharacterized LOC118567752	NC_000067.7:73152579-73158685	SPT20 SAGA complex component%2C transcript variant 3	NC_000069.7:54600525-54624321	56790	Supt20	GO:0000988	transcription factor activity, protein binding
XR_004936173.1	NM_023214.7	0.758743	0.004222	uncharacterized LOC118567752	NC_000067.7:73152579-73158685	solute carrier family 30 (zinc transporter)%2C member 7	NC_000069.7:115732621-115801055	66500	Slc30a7	GO:0003700	DNA binding transcription factor activity
XR_004936173.1	XM_036163227.1	0.829826	0.000838	uncharacterized LOC118567752	NC_000067.7:73152579-73158685	solute carrier family 30 (zinc transporter)%2C member 7%2C transcript variant X1	NC_000069.7:115765490-115801079	66500	Slc30a7	GO:0003700	DNA binding transcription factor activity
XR_004936173.1	TCONS_00005079	0.795538	0.001974	uncharacterized LOC118567752	NC_000067.7:73152579-73158685	TCONS_00005079	NC_000070.7:43531537-43571847	12913	Creb3	GO:0003700	DNA binding transcription factor activity
XR_004936173.1	NM_013497.4	0.725815	0.007533	uncharacterized LOC118567752	NC_000067.7:73152579-73158685	cAMP responsive element binding protein 3	NC_000070.7:43562657-43567061	12913	Creb3	GO:0003700	DNA binding transcription factor activity
XR_004936173.1	NM_001290696.1	0.791054	0.002182	uncharacterized LOC118567752	NC_000067.7:73152579-73158685	forkhead box J3%2C transcript variant 2	NC_000070.7:119396857-119486316	230700	Foxj3	GO:0003700	DNA binding transcription factor activity
XR_004936173.1	XM_030253749.2	-0.700021	0.011254	uncharacterized LOC118567752	NC_000067.7:73152579-73158685	arginine glutamic acid dipeptide (RE) repeats%2C transcript variant X11	NC_000070.7:150365371-150706423	68703	Rere	GO:0003700	DNA binding transcription factor activity
XR_004936173.1	NM_198052.2	-0.81408	0.001269	uncharacterized LOC118567752	NC_000067.7:73152579-73158685	T-box 3%2C transcript variant 2	NC_000071.7:119808926-119822789	21386	Tbx3	GO:0003700	DNA binding transcription factor activity
XR_004936173.1	TCONS_00007037	0.899648	6.8e-05	uncharacterized LOC118567752	NC_000067.7:73152579-73158685	TCONS_00007037	NC_000071.7:119812586-119822330	21386	Tbx3	GO:0003700	DNA binding transcription factor activity
XR_004936173.1	XM_006505311.5	0.739808	0.00595	uncharacterized LOC118567752	NC_000067.7:73152579-73158685	forkhead box P1%2C transcript variant X3	NC_000072.7:98902302-99243560	108655	Foxp1	GO:0003700	DNA binding transcription factor activity
XR_004936173.1	XM_011250460.4	0.715916	0.008831	uncharacterized LOC118567752	NC_000067.7:73152579-73158685	avian reticuloendotheliosis viral (v-rel) oncogene related B%2C transcript variant X4	NC_000073.7:19340141-19360634	19698	Relb	GO:0003700	DNA binding transcription factor activity
XR_004936173.1	NM_001166585.2	0.802272	0.00169	uncharacterized LOC118567752	NC_000067.7:73152579-73158685	TEA domain family member 1%2C transcript variant 3	NC_000073.7:112278562-112505991	21676	Tead1	GO:0003700	DNA binding transcription factor activity
XR_004936173.1	XM_011242265.3	0.718047	0.008538	uncharacterized LOC118567752	NC_000067.7:73152579-73158685	nuclear receptor subfamily 2%2C group F%2C member 6%2C transcript variant X4	NC_000074.7:71826761-71831012	13864	Nr2f6	GO:0003700	DNA binding transcription factor activity
XR_004936173.1	NM_010150.2	0.743252	0.005602	uncharacterized LOC118567752	NC_000067.7:73152579-73158685	nuclear receptor subfamily 2%2C group F%2C member 6	NC_000074.7:71826762-71834596	13864	Nr2f6	GO:0003700	DNA binding transcription factor activity
XR_004936173.1	NM_001083906.2	-0.754182	0.004598	uncharacterized LOC118567752	NC_000067.7:73152579-73158685	nuclear receptor subfamily 3%2C group C%2C member 2	NC_000074.7:77628957-77971641	110784	Nr3c2	GO:0003700	DNA binding transcription factor activity
XR_004936173.1	NM_008539.4	0.71953	0.008339	uncharacterized LOC118567752	NC_000067.7:73152579-73158685	SMAD family member 1	NC_000074.7:80065023-80126057	17125	Smad1	GO:0003700	DNA binding transcription factor activity
XR_004936173.1	TCONS_00012277	0.70902	0.009828	uncharacterized LOC118567752	NC_000067.7:73152579-73158685	TCONS_00012277	NC_000074.7:85435477-85526325	18032	Nfix	GO:0003700	DNA binding transcription factor activity
XR_004936173.1	XM_006510971.4	0.754588	0.004564	uncharacterized LOC118567752	NC_000067.7:73152579-73158685	transcription factor Dp 2%2C transcript variant X13	NC_000075.7:96078524-96205699	211586	Tfdp2	GO:0003700	DNA binding transcription factor activity
XR_004936173.1	NM_009044.3	0.77492	0.003074	uncharacterized LOC118567752	NC_000067.7:73152579-73158685	reticuloendotheliosis oncogene	NC_000077.7:23686846-23720969	19696	Rel	GO:0003700	DNA binding transcription factor activity
XR_004936173.1	NM_007840.3	0.706486	0.010215	uncharacterized LOC118567752	NC_000067.7:73152579-73158685	DEAD box helicase 5	NC_000077.7:106671181-106679320	13207	Ddx5	GO:0000988	transcription factor activity, protein binding
XR_004936173.1	TCONS_00017083	0.875174	0.000193	uncharacterized LOC118567752	NC_000067.7:73152579-73158685	TCONS_00017083	NC_000077.7:106673520-106679733	13207	Ddx5	GO:0000988	transcription factor activity, protein binding
XR_004936173.1	XM_036157843.1	0.756994	0.004364	uncharacterized LOC118567752	NC_000067.7:73152579-73158685	E2F transcription factor 3%2C transcript variant X4	NC_000079.7:30090557-30131040	13557	E2f3	GO:0003700	DNA binding transcription factor activity
XR_004936173.1	XM_006517971.5	0.731989	0.0068	uncharacterized LOC118567752	NC_000067.7:73152579-73158685	thyroid hormone receptor beta%2C transcript variant X14	NC_000080.7:4429598-4551410	21834	Thrb	GO:0003700	DNA binding transcription factor activity
XR_004936173.1	NM_008092.4	0.708629	0.009887	uncharacterized LOC118567752	NC_000067.7:73152579-73158685	GATA binding protein 4%2C transcript variant 2	NC_000080.7:63436362-63482720	14463	Gata4	GO:0003700	DNA binding transcription factor activity
XR_004936173.1	XM_011244957.3	-0.823356	0.000999	uncharacterized LOC118567752	NC_000067.7:73152579-73158685	GATA binding protein 4%2C transcript variant X2	NC_000080.7:63436369-63508582	14463	Gata4	GO:0003700	DNA binding transcription factor activity
XR_004936173.1	NM_007920.4	0.786987	0.002385	uncharacterized LOC118567752	NC_000067.7:73152579-73158685	E74-like factor 1%2C transcript variant 1	NC_000080.7:79718633-79819931	13709	Elf1	GO:0003700	DNA binding transcription factor activity
XR_004936173.1	NM_011144.6	0.824145	0.000978	uncharacterized LOC118567752	NC_000067.7:73152579-73158685	peroxisome proliferator activated receptor alpha%2C transcript variant 1	NC_000081.7:85619976-85691052	19013	Ppara	GO:0003700	DNA binding transcription factor activity
XR_004936173.1	NM_023794.2	0.728234	0.007239	uncharacterized LOC118567752	NC_000067.7:73152579-73158685	ets variant 5%2C transcript variant 2	NC_000082.7:22200062-22258320	104156	Etv5	GO:0003700	DNA binding transcription factor activity
XR_004936173.1	TCONS_00022804	0.704124	0.010586	uncharacterized LOC118567752	NC_000067.7:73152579-73158685	TCONS_00022804	NC_000083.7:28547546-28569776	21678	Tead3	GO:0003700	DNA binding transcription factor activity
XR_004936173.1	XM_030250933.2	0.726671	0.007428	uncharacterized LOC118567752	NC_000067.7:73152579-73158685	metastasis-associated gene family%2C member 2%2C transcript variant X2	NC_000085.7:8919704-8929663	23942	Mta2	GO:0003700	DNA binding transcription factor activity
TCONS_00001038	NM_010880.3	0.709624	0.009738	TCONS_00001038	NC_000067.7:74039625-74108132	nucleolin	NC_000067.7:86272440-86287177	17975	Ncl	GO:0000988	transcription factor activity, protein binding
TCONS_00001038	NM_011137.3	0.910769	3.8e-05	TCONS_00001038	NC_000067.7:74039625-74108132	POU domain%2C class 2%2C transcription factor 1%2C transcript variant 1	NC_000067.7:165692722-165830203	18986	Pou2f1	GO:0003700	DNA binding transcription factor activity
TCONS_00001038	NM_023326.2	0.746843	0.005255	TCONS_00001038	NC_000067.7:74039625-74108132	brain expressed myelocytomatosis oncogene	NC_000068.8:25596890-25597733	107771	Bmyc	GO:0003700	DNA binding transcription factor activity
TCONS_00001038	NM_011957.2	0.808458	0.001458	TCONS_00001038	NC_000067.7:74039625-74108132	cAMP responsive element binding protein 3-like 1	NC_000068.8:91812672-91854515	26427	Creb3l1	GO:0003700	DNA binding transcription factor activity
TCONS_00001038	NM_009883.4	-0.737986	0.00614	TCONS_00001038	NC_000067.7:74039625-74108132	CCAAT/enhancer binding protein (C/EBP)%2C beta%2C transcript variant 1	NC_000068.8:167530834-167532352	12608	Cebpb	GO:0003700	DNA binding transcription factor activity
TCONS_00001038	NM_010899.3	0.715471	0.008893	TCONS_00001038	NC_000067.7:74039625-74108132	nuclear factor of activated T cells%2C cytoplasmic%2C calcineurin dependent 2%2C transcript variant 1	NC_000068.8:168318329-168432285	18019	Nfatc2	GO:0003700	DNA binding transcription factor activity
TCONS_00001038	NM_001081229.2	-0.705916	0.010304	TCONS_00001038	NC_000067.7:74039625-74108132	TSC22 domain family%2C member 2%2C transcript variant 1	NC_000069.7:58322140-58374208	72033	Tsc22d2	GO:0003700	DNA binding transcription factor activity
TCONS_00001038	XM_006539139.4	0.751173	0.00486	TCONS_00001038	NC_000067.7:74039625-74108132	arginine glutamic acid dipeptide (RE) repeats%2C transcript variant X5	NC_000070.7:150365371-150706423	68703	Rere	GO:0003700	DNA binding transcription factor activity
TCONS_00001038	XM_030253746.2	0.771236	0.003311	TCONS_00001038	NC_000067.7:74039625-74108132	arginine glutamic acid dipeptide (RE) repeats%2C transcript variant X8	NC_000070.7:150365371-150706423	68703	Rere	GO:0003700	DNA binding transcription factor activity
TCONS_00001038	XM_030253745.2	0.846543	0.000515	TCONS_00001038	NC_000067.7:74039625-74108132	arginine glutamic acid dipeptide (RE) repeats%2C transcript variant X7	NC_000070.7:150452812-150706423	68703	Rere	GO:0003700	DNA binding transcription factor activity
TCONS_00001038	XM_030253751.2	0.713031	0.009238	TCONS_00001038	NC_000067.7:74039625-74108132	arginine glutamic acid dipeptide (RE) repeats%2C transcript variant X15	NC_000070.7:150561931-150706423	68703	Rere	GO:0003700	DNA binding transcription factor activity
TCONS_00001038	NM_011537.3	0.833853	0.000749	TCONS_00001038	NC_000067.7:74039625-74108132	T-box 5	NC_000071.7:119972727-120023283	21388	Tbx5	GO:0003700	DNA binding transcription factor activity
TCONS_00001038	XM_036154180.1	0.777707	0.002903	TCONS_00001038	NC_000067.7:74039625-74108132	nuclear factor of activated T cells 5%2C transcript variant X8	NC_000074.7:108020101-108106142	54446	Nfat5	GO:0003700	DNA binding transcription factor activity
TCONS_00001038	NM_001109873.1	0.948317	3e-06	TCONS_00001038	NC_000067.7:74039625-74108132	CBFA2/RUNX1 translocation partner 3%2C transcript variant 2	NC_000074.7:123351874-123404914	12398	Cbfa2t3	GO:0003700	DNA binding transcription factor activity
TCONS_00001038	NM_177289.1	0.843279	0.000569	TCONS_00001038	NC_000067.7:74039625-74108132	CBFA2/RUNX1 translocation partner 3%2C transcript variant 3	NC_000074.7:123351874-123404914	12398	Cbfa2t3	GO:0003700	DNA binding transcription factor activity
TCONS_00001038	XM_006510008.3	0.806341	0.001534	TCONS_00001038	NC_000067.7:74039625-74108132	Friend leukemia integration 1%2C transcript variant X2	NC_000075.7:32333499-32454728	14247	Fli1	GO:0003700	DNA binding transcription factor activity
TCONS_00001038	NM_183316.2	0.702652	0.010822	TCONS_00001038	NC_000067.7:74039625-74108132	small nuclear RNA activating complex%2C polypeptide 5	NC_000075.7:64086578-64089970	330959	Snapc5	GO:0003700	DNA binding transcription factor activity
TCONS_00001038	XM_006510962.5	0.812829	0.001309	TCONS_00001038	NC_000067.7:74039625-74108132	transcription factor Dp 2%2C transcript variant X2	NC_000075.7:96078326-96205699	211586	Tfdp2	GO:0003700	DNA binding transcription factor activity
TCONS_00001038	XM_030244871.2	0.813273	0.001295	TCONS_00001038	NC_000067.7:74039625-74108132	ELK3%2C member of ETS oncogene family%2C transcript variant X1	NC_000076.7:93083276-93146402	13713	Elk3	GO:0003700	DNA binding transcription factor activity
TCONS_00001038	NM_009024.2	0.723768	0.007789	TCONS_00001038	NC_000067.7:74039625-74108132	retinoic acid receptor%2C alpha%2C transcript variant 1	NC_000077.7:98828521-98865768	19401	Rara	GO:0003700	DNA binding transcription factor activity
TCONS_00001038	XM_011244956.3	0.838333	0.000659	TCONS_00001038	NC_000067.7:74039625-74108132	GATA binding protein 4%2C transcript variant X1	NC_000080.7:63436369-63509161	14463	Gata4	GO:0003700	DNA binding transcription factor activity
TCONS_00001038	XM_030248977.2	0.831385	0.000803	TCONS_00001038	NC_000067.7:74039625-74108132	GA repeat binding protein%2C alpha%2C transcript variant X7	NC_000082.7:84631794-84660671	14390	Gabpa	GO:0003700	DNA binding transcription factor activity
TCONS_00001038	NM_001302153.1	0.87061	0.000229	TCONS_00001038	NC_000067.7:74039625-74108132	ETS transcription factor%2C transcript variant 3	NC_000082.7:95160027-95260207	13876	Erg	GO:0003700	DNA binding transcription factor activity
TCONS_00001038	NM_027007.2	0.87871	0.000168	TCONS_00001038	NC_000067.7:74039625-74108132	zinc finger protein 397	NC_000084.7:24087744-24097728	69256	Zfp397	GO:0003700	DNA binding transcription factor activity
TCONS_00001038	NM_001164111.1	0.828778	0.000863	TCONS_00001038	NC_000067.7:74039625-74108132	nuclear factor of activated T cells%2C cytoplasmic%2C calcineurin dependent 1%2C transcript variant 6	NC_000084.7:80649419-80751388	18018	Nfatc1	GO:0003700	DNA binding transcription factor activity
TCONS_00001038	XM_006528139.3	0.721087	0.008134	TCONS_00001038	NC_000067.7:74039625-74108132	forkhead box O4%2C transcript variant X1	NC_000086.8:100297854-100301320	54601	Foxo4	GO:0003700	DNA binding transcription factor activity
TCONS_00001038	TCONS_00025632	-0.743938	0.005534	TCONS_00001038	NC_000067.7:74039625-74108132	TCONS_00025632	NC_000086.8:139440276-139447588	14605	Tsc22d3	GO:0003700	DNA binding transcription factor activity
NR_037976.1	NM_001376955.1	-0.707651	0.010036	predicted gene 15179	NC_000067.7:75344853-75351659	ELK4%2C member of ETS oncogene family%2C transcript variant 3	NC_000067.7:131936082-131954186	13714	Elk4	GO:0003700	DNA binding transcription factor activity
NR_037976.1	NM_010226.2	0.755231	0.00451	predicted gene 15179	NC_000067.7:75344853-75351659	forkhead box S1	NC_000068.8:152773817-152775128	14239	Foxs1	GO:0003700	DNA binding transcription factor activity
NR_037976.1	NM_012051.4	0.701811	0.010959	predicted gene 15179	NC_000067.7:75344853-75351659	ets variant 3%2C transcript variant 3	NC_000069.7:87432884-87447465	27049	Etv3	GO:0003700	DNA binding transcription factor activity
NR_037976.1	XM_006537572.3	0.819383	0.001108	predicted gene 15179	NC_000067.7:75344853-75351659	RUNX1 translocation partner 1%2C transcript variant X6	NC_000070.7:13743746-13895056	12395	Runx1t1	GO:0003700	DNA binding transcription factor activity
NR_037976.1	NM_001368177.1	0.711408	0.009474	predicted gene 15179	NC_000067.7:75344853-75351659	GC-rich promoter binding protein 1-like 1%2C transcript variant 2	NC_000070.7:116415275-116451099	77110	Gpbp1l1	GO:0003700	DNA binding transcription factor activity
NR_037976.1	TCONS_00009896	0.804478	0.001604	predicted gene 15179	NC_000067.7:75344853-75351659	TCONS_00009896	NC_000073.7:90091988-90097251	233490	Crebzf	GO:0003700	DNA binding transcription factor activity
NR_037976.1	NM_010901.3	0.828578	0.000868	predicted gene 15179	NC_000067.7:75344853-75351659	nuclear factor of activated T cells%2C cytoplasmic%2C calcineurin dependent 3%2C transcript variant 1	NC_000074.7:106786221-106857169	18021	Nfatc3	GO:0003700	DNA binding transcription factor activity
NR_037976.1	NM_001301811.1	0.728566	0.0072	predicted gene 15179	NC_000067.7:75344853-75351659	interferon regulatory factor 8%2C transcript variant 1	NC_000074.7:121465377-121483433	15900	Irf8	GO:0003700	DNA binding transcription factor activity
NR_037976.1	NM_001362682.1	0.726602	0.007437	predicted gene 15179	NC_000067.7:75344853-75351659	signal transducer and activator of transcription 5B%2C transcript variant 3	NC_000077.7:100671556-100704196	20851	Stat5b	GO:0003700	DNA binding transcription factor activity
NR_037976.1	XM_030247246.2	0.782768	0.002611	predicted gene 15179	NC_000067.7:75344853-75351659	zinc finger and SCAN domain containing 12%2C transcript variant X1	NC_000079.7:21546981-21556458	22758	Zscan12	GO:0003700	DNA binding transcription factor activity
NR_037976.1	XM_017315418.2	0.702465	0.010852	predicted gene 15179	NC_000067.7:75344853-75351659	nuclear factor%2C interleukin 3%2C regulated%2C transcript variant X1	NC_000079.7:53121244-53133891	18030	Nfil3	GO:0003700	DNA binding transcription factor activity
NR_037976.1	TCONS_00021107	0.924406	1.7e-05	predicted gene 15179	NC_000067.7:75344853-75351659	TCONS_00021107	NC_000081.7:100472952-100498314	19009	Pou6f1	GO:0003700	DNA binding transcription factor activity
NR_037976.1	XM_006520609.4	-0.764206	0.003803	predicted gene 15179	NC_000067.7:75344853-75351659	POU domain%2C class 6%2C transcription factor 1%2C transcript variant X3	NC_000081.7:100473198-100497936	19009	Pou6f1	GO:0003700	DNA binding transcription factor activity
NR_037976.1	XM_036160410.1	0.773997	0.003132	predicted gene 15179	NC_000067.7:75344853-75351659	peroxisome proliferator activator receptor delta%2C transcript variant X3	NC_000083.7:28451687-28520446	19015	Ppard	GO:0003700	DNA binding transcription factor activity
NR_037976.1	XM_030250313.2	0.724349	0.007716	predicted gene 15179	NC_000067.7:75344853-75351659	cAMP responsive element modulator%2C transcript variant X44	NC_000084.7:3263180-3281621	12916	Crem	GO:0003700	DNA binding transcription factor activity
NR_037976.1	XM_017318022.3	0.78571	0.002452	predicted gene 15179	NC_000067.7:75344853-75351659	zinc finger and SCAN domain containing 30%2C transcript variant X1	NC_000084.7:24095824-24120362	328918	Zscan30	GO:0003700	DNA binding transcription factor activity
NR_037976.1	XM_006528505.5	0.720756	0.008177	predicted gene 15179	NC_000067.7:75344853-75351659	TSC22 domain family%2C member 3%2C transcript variant X4	NC_000086.8:139440276-139499960	14605	Tsc22d3	GO:0003700	DNA binding transcription factor activity
XR_373578.4	NM_010880.3	-0.902367	5.9e-05	RIKEN cDNA 2310015K22 gene	NC_000067.7:80185705-80207331	nucleolin	NC_000067.7:86272440-86287177	17975	Ncl	GO:0000988	transcription factor activity, protein binding
XR_373578.4	XM_011238796.4	0.763727	0.003839	RIKEN cDNA 2310015K22 gene	NC_000067.7:80185705-80207331	activating transcription factor 6%2C transcript variant X2	NC_000067.7:170532244-170696154	226641	Atf6	GO:0003700	DNA binding transcription factor activity
XR_373578.4	NM_023326.2	-0.7267	0.007425	RIKEN cDNA 2310015K22 gene	NC_000067.7:80185705-80207331	brain expressed myelocytomatosis oncogene	NC_000068.8:25596890-25597733	107771	Bmyc	GO:0003700	DNA binding transcription factor activity
XR_373578.4	XM_030247023.1	0.791863	0.002143	RIKEN cDNA 2310015K22 gene	NC_000067.7:80185705-80207331	CBFA2/RUNX1 translocation partner 2%2C transcript variant X3	NC_000068.8:154278017-154381276	12396	Cbfa2t2	GO:0003700	DNA binding transcription factor activity
XR_373578.4	NM_007891.5	0.855959	0.000381	RIKEN cDNA 2310015K22 gene	NC_000067.7:80185705-80207331	E2F transcription factor 1%2C transcript variant 1	NC_000068.8:154401319-154411812	13555	E2f1	GO:0003700	DNA binding transcription factor activity
XR_373578.4	NM_019739.3	0.759932	0.004128	RIKEN cDNA 2310015K22 gene	NC_000067.7:80185705-80207331	forkhead box O1	NC_000069.7:52175757-52257530	56458	Foxo1	GO:0003700	DNA binding transcription factor activity
XR_373578.4	NM_011281.3	0.752066	0.004781	RIKEN cDNA 2310015K22 gene	NC_000067.7:80185705-80207331	RAR-related orphan receptor gamma%2C transcript variant 1	NC_000069.7:94280100-94305583	19885	Rorc	GO:0003700	DNA binding transcription factor activity
XR_373578.4	NM_194060.1	0.913465	3.3e-05	RIKEN cDNA 2310015K22 gene	NC_000067.7:80185705-80207331	forkhead box O6	NC_000070.7:120124274-120144458	329934	Foxo6	GO:0003700	DNA binding transcription factor activity
XR_373578.4	XM_006503134.4	0.769748	0.003411	RIKEN cDNA 2310015K22 gene	NC_000067.7:80185705-80207331	zinc finger and SCAN domains 20%2C transcript variant X5	NC_000070.7:128472343-128501962	269585	Zscan20	GO:0003700	DNA binding transcription factor activity
XR_373578.4	XM_030253741.2	0.861064	0.000321	RIKEN cDNA 2310015K22 gene	NC_000067.7:80185705-80207331	arginine glutamic acid dipeptide (RE) repeats%2C transcript variant X2	NC_000070.7:150452812-150706423	68703	Rere	GO:0003700	DNA binding transcription factor activity
XR_373578.4	XM_030253745.2	-0.719135	0.008392	RIKEN cDNA 2310015K22 gene	NC_000067.7:80185705-80207331	arginine glutamic acid dipeptide (RE) repeats%2C transcript variant X7	NC_000070.7:150452812-150706423	68703	Rere	GO:0003700	DNA binding transcription factor activity
XR_373578.4	NM_011537.3	-0.772776	0.00321	RIKEN cDNA 2310015K22 gene	NC_000067.7:80185705-80207331	T-box 5	NC_000071.7:119972727-120023283	21388	Tbx5	GO:0003700	DNA binding transcription factor activity
XR_373578.4	NM_133906.4	0.708901	0.009846	RIKEN cDNA 2310015K22 gene	NC_000067.7:80185705-80207331	zinc finger with KRAB and SCAN domains 1%2C transcript variant 1	NC_000071.7:138083345-138106084	74570	Zkscan1	GO:0003700	DNA binding transcription factor activity
XR_373578.4	XM_030255071.2	0.921371	2.1e-05	RIKEN cDNA 2310015K22 gene	NC_000067.7:80185705-80207331	forkhead box P1%2C transcript variant X36	NC_000072.7:98902302-99005269	108655	Foxp1	GO:0003700	DNA binding transcription factor activity
XR_373578.4	XM_017321306.3	0.917877	2.6e-05	RIKEN cDNA 2310015K22 gene	NC_000067.7:80185705-80207331	forkhead box P1%2C transcript variant X27	NC_000072.7:98902302-99005279	108655	Foxp1	GO:0003700	DNA binding transcription factor activity
XR_373578.4	NM_001127330.2	0.77915	0.002817	RIKEN cDNA 2310015K22 gene	NC_000067.7:80185705-80207331	peroxisome proliferator activated receptor gamma%2C transcript variant 1	NC_000072.7:115337911-115467362	19016	Pparg	GO:0003700	DNA binding transcription factor activity
XR_373578.4	NM_008036.2	0.778064	0.002881	RIKEN cDNA 2310015K22 gene	NC_000067.7:80185705-80207331	FBJ osteosarcoma oncogene B%2C transcript variant 1	NC_000073.7:19036620-19043970	14282	Fosb	GO:0003700	DNA binding transcription factor activity
XR_373578.4	XM_030242128.2	-0.703255	0.010725	RIKEN cDNA 2310015K22 gene	NC_000067.7:80185705-80207331	Ets2 repressor factor%2C transcript variant X1	NC_000073.7:24941984-24948954	13875	Erf	GO:0003700	DNA binding transcription factor activity
XR_373578.4	NM_010155.3	-0.874362	0.000199	RIKEN cDNA 2310015K22 gene	NC_000067.7:80185705-80207331	Ets2 repressor factor	NC_000073.7:24941984-24950183	13875	Erf	GO:0003700	DNA binding transcription factor activity
XR_373578.4	NM_009884.3	0.876774	0.000181	RIKEN cDNA 2310015K22 gene	NC_000067.7:80185705-80207331	CCAAT/enhancer binding protein (C/EBP)%2C gamma	NC_000073.7:34745846-34755991	12611	Cebpg	GO:0003700	DNA binding transcription factor activity
XR_373578.4	NM_007678.3	0.830531	0.000822	RIKEN cDNA 2310015K22 gene	NC_000067.7:80185705-80207331	CCAAT/enhancer binding protein (C/EBP)%2C alpha%2C transcript variant 1	NC_000073.7:34818717-34821353	12606	Cebpa	GO:0003700	DNA binding transcription factor activity
XR_373578.4	NM_030693.2	0.803478	0.001642	RIKEN cDNA 2310015K22 gene	NC_000067.7:80185705-80207331	activating transcription factor 5%2C transcript variant 1	NC_000073.7:44461679-44465082	107503	Atf5	GO:0003700	DNA binding transcription factor activity
XR_373578.4	NM_016974.3	-0.757396	0.004331	RIKEN cDNA 2310015K22 gene	NC_000067.7:80185705-80207331	D site albumin promoter binding protein	NC_000073.7:45354670-45359627	13170	Dbp	GO:0003700	DNA binding transcription factor activity
XR_373578.4	XM_006540597.2	-0.741306	0.005796	RIKEN cDNA 2310015K22 gene	NC_000067.7:80185705-80207331	D site albumin promoter binding protein%2C transcript variant X2	NC_000073.7:45356029-45359579	13170	Dbp	GO:0003700	DNA binding transcription factor activity
XR_373578.4	XM_006541012.5	0.786201	0.002426	RIKEN cDNA 2310015K22 gene	NC_000067.7:80185705-80207331	sphingosine kinase 2%2C transcript variant X2	NC_000073.7:45359684-45364557	56632	Sphk2	GO:0003700	DNA binding transcription factor activity
XR_373578.4	NM_001252601.1	0.773022	0.003194	RIKEN cDNA 2310015K22 gene	NC_000067.7:80185705-80207331	interferon regulatory factor 7%2C transcript variant 3	NC_000073.7:140843095-140846337	54123	Irf7	GO:0003700	DNA binding transcription factor activity
XR_373578.4	NM_016850.3	0.841499	0.0006	RIKEN cDNA 2310015K22 gene	NC_000067.7:80185705-80207331	interferon regulatory factor 7%2C transcript variant 1	NC_000073.7:140843095-140846337	54123	Irf7	GO:0003700	DNA binding transcription factor activity
XR_373578.4	NM_010150.2	0.707261	0.010096	RIKEN cDNA 2310015K22 gene	NC_000067.7:80185705-80207331	nuclear receptor subfamily 2%2C group F%2C member 6	NC_000074.7:71826762-71834596	13864	Nr2f6	GO:0003700	DNA binding transcription factor activity
XR_373578.4	TCONS_00012277	0.726722	0.007422	RIKEN cDNA 2310015K22 gene	NC_000067.7:80185705-80207331	TCONS_00012277	NC_000074.7:85435477-85526325	18032	Nfix	GO:0003700	DNA binding transcription factor activity
XR_373578.4	NM_001256042.1	-0.731136	0.006898	RIKEN cDNA 2310015K22 gene	NC_000067.7:80185705-80207331	heat shock transcription factor 4%2C transcript variant 1	NC_000074.7:105996432-106002477	26386	Hsf4	GO:0003700	DNA binding transcription factor activity
XR_373578.4	XM_006531039.3	0.803678	0.001635	RIKEN cDNA 2310015K22 gene	NC_000067.7:80185705-80207331	heat shock transcription factor 4%2C transcript variant X3	NC_000074.7:105996560-106002473	26386	Hsf4	GO:0003700	DNA binding transcription factor activity
XR_373578.4	TCONS_00013920	0.975002	0	RIKEN cDNA 2310015K22 gene	NC_000067.7:80185705-80207331	TCONS_00013920	NC_000075.7:122677987-122694972	235682	Zfp445	GO:0003700	DNA binding transcription factor activity
XR_373578.4	TCONS_00013922	0.765191	0.003731	RIKEN cDNA 2310015K22 gene	NC_000067.7:80185705-80207331	TCONS_00013922	NC_000075.7:122677987-122695059	235682	Zfp445	GO:0003700	DNA binding transcription factor activity
XR_373578.4	XM_036155891.1	0.716726	0.008719	RIKEN cDNA 2310015K22 gene	NC_000067.7:80185705-80207331	E2F transcription factor 7%2C transcript variant X1	NC_000076.7:110580798-110623234	52679	E2f7	GO:0003700	DNA binding transcription factor activity
XR_373578.4	NM_019963.2	0.865328	0.000277	RIKEN cDNA 2310015K22 gene	NC_000067.7:80185705-80207331	signal transducer and activator of transcription 2	NC_000076.7:128106366-128128722	20847	Stat2	GO:0003700	DNA binding transcription factor activity
XR_373578.4	NM_001271730.1	0.738999	0.006034	RIKEN cDNA 2310015K22 gene	NC_000067.7:80185705-80207331	X-box binding protein 1%2C transcript variant 2	NC_000077.7:5470640-5475993	22433	Xbp1	GO:0003700	DNA binding transcription factor activity
XR_373578.4	NM_001130529.2	0.725335	0.007593	RIKEN cDNA 2310015K22 gene	NC_000067.7:80185705-80207331	zinc finger with KRAB and SCAN domains 17%2C transcript variant 2	NC_000077.7:59376345-59397466	268417	Zkscan17	GO:0003700	DNA binding transcription factor activity
XR_373578.4	NM_001195003.1	0.738306	0.006106	RIKEN cDNA 2310015K22 gene	NC_000067.7:80185705-80207331	K(lysine) acetyltransferase 7%2C transcript variant 1	NC_000077.7:95162678-95201072	217127	Kat7	GO:0003700	DNA binding transcription factor activity
XR_373578.4	NM_145434.4	-0.805978	0.001548	RIKEN cDNA 2310015K22 gene	NC_000067.7:80185705-80207331	nuclear receptor subfamily 1%2C group D%2C member 1	NC_000077.7:98658757-98666203	217166	Nr1d1	GO:0003700	DNA binding transcription factor activity
XR_373578.4	NM_009024.2	-0.707253	0.010097	RIKEN cDNA 2310015K22 gene	NC_000067.7:80185705-80207331	retinoic acid receptor%2C alpha%2C transcript variant 1	NC_000077.7:98828521-98865768	19401	Rara	GO:0003700	DNA binding transcription factor activity
XR_373578.4	NM_011489.3	0.794893	0.002003	RIKEN cDNA 2310015K22 gene	NC_000067.7:80185705-80207331	signal transducer and activator of transcription 5B%2C transcript variant 1	NC_000077.7:100671556-100713396	20851	Stat5b	GO:0003700	DNA binding transcription factor activity
XR_373578.4	NM_001113563.2	0.797112	0.001904	RIKEN cDNA 2310015K22 gene	NC_000067.7:80185705-80207331	signal transducer and activator of transcription 5B%2C transcript variant 2	NC_000077.7:100671556-100741407	20851	Stat5b	GO:0003700	DNA binding transcription factor activity
XR_373578.4	NM_011488.3	0.910098	4e-05	RIKEN cDNA 2310015K22 gene	NC_000067.7:80185705-80207331	signal transducer and activator of transcription 5A%2C transcript variant 1	NC_000077.7:100750176-100775995	20850	Stat5a	GO:0003700	DNA binding transcription factor activity
XR_373578.4	NM_011486.5	0.7057	0.010338	RIKEN cDNA 2310015K22 gene	NC_000067.7:80185705-80207331	signal transducer and activator of transcription 3%2C transcript variant 3	NC_000077.7:100777631-100830366	20848	Stat3	GO:0003700	DNA binding transcription factor activity
XR_373578.4	XM_036157224.1	0.724647	0.007678	RIKEN cDNA 2310015K22 gene	NC_000067.7:80185705-80207331	nuclear receptor coactivator 1%2C transcript variant X10	NC_000078.7:4297425-4526714	17977	Ncoa1	GO:0000988	transcription factor activity, protein binding
XR_373578.4	NM_033270.2	0.774084	0.003127	RIKEN cDNA 2310015K22 gene	NC_000067.7:80185705-80207331	E2F transcription factor 6%2C transcript variant 1	NC_000078.7:16860965-16876753	50496	E2f6	GO:0003700	DNA binding transcription factor activity
XR_373578.4	NM_010234.3	0.787804	0.002343	RIKEN cDNA 2310015K22 gene	NC_000067.7:80185705-80207331	FBJ osteosarcoma oncogene	NC_000078.7:85520663-85524048	14281	Fos	GO:0003700	DNA binding transcription factor activity
XR_373578.4	XM_017315205.2	0.864829	0.000282	RIKEN cDNA 2310015K22 gene	NC_000067.7:80185705-80207331	forkhead box N3%2C transcript variant X11	NC_000078.7:99156339-99359248	71375	Foxn3	GO:0003700	DNA binding transcription factor activity
XR_373578.4	XM_006516232.5	0.735497	0.006408	RIKEN cDNA 2310015K22 gene	NC_000067.7:80185705-80207331	forkhead box N3%2C transcript variant X1	NC_000078.7:99156339-99529918	71375	Foxn3	GO:0003700	DNA binding transcription factor activity
XR_373578.4	NM_017373.3	0.907769	4.5e-05	RIKEN cDNA 2310015K22 gene	NC_000067.7:80185705-80207331	nuclear factor%2C interleukin 3%2C regulated	NC_000079.7:53121244-53135075	18030	Nfil3	GO:0003700	DNA binding transcription factor activity
XR_373578.4	NM_001122963.2	0.799021	0.001823	RIKEN cDNA 2310015K22 gene	NC_000067.7:80185705-80207331	GC-rich promoter binding protein 1%2C transcript variant 1	NC_000079.7:111562213-111626661	73274	Gpbp1	GO:0003700	DNA binding transcription factor activity
XR_373578.4	XM_036158539.1	0.915411	3e-05	RIKEN cDNA 2310015K22 gene	NC_000067.7:80185705-80207331	thyroid hormone receptor beta%2C transcript variant X19	NC_000080.7:4429598-4810538	21834	Thrb	GO:0003700	DNA binding transcription factor activity
XR_373578.4	NM_001159417.1	0.860539	0.000327	RIKEN cDNA 2310015K22 gene	NC_000067.7:80185705-80207331	interferon regulatory factor 9%2C transcript variant 1	NC_000080.7:55841441-55847487	16391	Irf9	GO:0003700	DNA binding transcription factor activity
XR_373578.4	NM_009366.4	0.747053	0.005236	RIKEN cDNA 2310015K22 gene	NC_000067.7:80185705-80207331	TSC22 domain family%2C member 1%2C transcript variant 2	NC_000080.7:76741949-76745205	21807	Tsc22d1	GO:0003700	DNA binding transcription factor activity
XR_373578.4	NM_001357926.1	0.751632	0.004819	RIKEN cDNA 2310015K22 gene	NC_000067.7:80185705-80207331	metadherin%2C transcript variant 1	NC_000081.7:34082864-34143683	67154	Mtdh	GO:0003700	DNA binding transcription factor activity
XR_373578.4	XM_036159165.1	0.783143	0.00259	RIKEN cDNA 2310015K22 gene	NC_000067.7:80185705-80207331	heat shock factor 1%2C transcript variant X3	NC_000081.7:76361648-76385176	15499	Hsf1	GO:0003700	DNA binding transcription factor activity
XR_373578.4	NM_153484.3	0.733722	0.006604	RIKEN cDNA 2310015K22 gene	NC_000067.7:80185705-80207331	thyrotroph embryonic factor%2C transcript variant 2	NC_000081.7:81686873-81711064	21685	Tef	GO:0003700	DNA binding transcription factor activity
XR_373578.4	XM_030248421.2	0.857576	0.000362	RIKEN cDNA 2310015K22 gene	NC_000067.7:80185705-80207331	peroxisome proliferator activated receptor alpha%2C transcript variant X9	NC_000081.7:85619621-85691052	19013	Ppara	GO:0003700	DNA binding transcription factor activity
XR_373578.4	NM_008065.2	-0.905832	5e-05	RIKEN cDNA 2310015K22 gene	NC_000067.7:80185705-80207331	GA repeat binding protein%2C alpha	NC_000082.7:84632011-84660667	14390	Gabpa	GO:0003700	DNA binding transcription factor activity
XR_373578.4	NM_011145.3	0.802769	0.00167	RIKEN cDNA 2310015K22 gene	NC_000067.7:80185705-80207331	peroxisome proliferator activator receptor delta	NC_000083.7:28451727-28520443	19015	Ppard	GO:0003700	DNA binding transcription factor activity
XR_373578.4	TCONS_00022266	0.720724	0.008181	RIKEN cDNA 2310015K22 gene	NC_000067.7:80185705-80207331	TCONS_00022266	NC_000083.7:34247248-34257377	20182	Rxrb	GO:0003700	DNA binding transcription factor activity
XR_373578.4	NM_017406.4	0.773006	0.003196	RIKEN cDNA 2310015K22 gene	NC_000067.7:80185705-80207331	activating transcription factor 6 beta	NC_000083.7:34866119-34874048	12915	Atf6b	GO:0003700	DNA binding transcription factor activity
XR_373578.4	NM_028767.2	-0.751596	0.004822	RIKEN cDNA 2310015K22 gene	NC_000067.7:80185705-80207331	forkhead box P4%2C transcript variant 3	NC_000083.7:48178057-48235557	74123	Foxp4	GO:0003700	DNA binding transcription factor activity
XR_373578.4	XM_030249554.2	0.816752	0.001186	RIKEN cDNA 2310015K22 gene	NC_000067.7:80185705-80207331	nuclear transcription factor-Y alpha%2C transcript variant X7	NC_000083.7:48693912-48716815	18044	Nfya	GO:0003700	DNA binding transcription factor activity
XR_373578.4	NM_010913.2	0.904354	5.4e-05	RIKEN cDNA 2310015K22 gene	NC_000067.7:80185705-80207331	nuclear transcription factor-Y alpha%2C transcript variant 2	NC_000083.7:48693912-48716848	18044	Nfya	GO:0003700	DNA binding transcription factor activity
XR_373578.4	NM_010258.3	-0.752162	0.004773	RIKEN cDNA 2310015K22 gene	NC_000067.7:80185705-80207331	GATA binding protein 6	NC_000084.7:11052509-11085635	14465	Gata6	GO:0003700	DNA binding transcription factor activity
XR_373578.4	NM_001369357.1	0.751931	0.004793	RIKEN cDNA 2310015K22 gene	NC_000067.7:80185705-80207331	TATA-box binding protein associated factor 4b%2C transcript variant 2	NC_000084.7:14916301-15035160	72504	Taf4b	GO:0003700	DNA binding transcription factor activity
XR_373578.4	NM_001364967.1	0.709434	0.009766	RIKEN cDNA 2310015K22 gene	NC_000067.7:80185705-80207331	SMAD family member 4%2C transcript variant 2	NC_000084.7:73767860-73836862	17128	Smad4	GO:0003700	DNA binding transcription factor activity
XR_373578.4	NM_007953.2	0.747995	0.005148	RIKEN cDNA 2310015K22 gene	NC_000067.7:80185705-80207331	estrogen related receptor%2C alpha	NC_000085.7:6888344-6899176	26379	Esrra	GO:0003700	DNA binding transcription factor activity
XR_373578.4	XM_036162179.1	0.746554	0.005283	RIKEN cDNA 2310015K22 gene	NC_000067.7:80185705-80207331	activating transcription factor 1%2C pseudogene	NC_000086.8:52885449-52886480	100040260	Atf1-ps	GO:0003700	DNA binding transcription factor activity
TCONS_00001097	XM_030252467.2	0.769683	0.003416	TCONS_00001097	NC_000067.7:85684930-85686469	signal transducer and activator of transcription 1%2C transcript variant X2	NC_000067.7:52158635-52200082	20846	Stat1	GO:0003700	DNA binding transcription factor activity
TCONS_00001097	NM_010880.3	-0.798686	0.001837	TCONS_00001097	NC_000067.7:85684930-85686469	nucleolin	NC_000067.7:86272440-86287177	17975	Ncl	GO:0000988	transcription factor activity, protein binding
TCONS_00001097	XM_011238796.4	0.716289	0.008779	TCONS_00001097	NC_000067.7:85684930-85686469	activating transcription factor 6%2C transcript variant X2	NC_000067.7:170532244-170696154	226641	Atf6	GO:0003700	DNA binding transcription factor activity
TCONS_00001097	NM_013839.4	0.804803	0.001592	TCONS_00001097	NC_000067.7:85684930-85686469	nuclear receptor subfamily 1%2C group H%2C member 3%2C transcript variant 1	NC_000068.8:91014405-91025380	22259	Nr1h3	GO:0003700	DNA binding transcription factor activity
TCONS_00001097	NM_001177730.1	0.808196	0.001467	TCONS_00001097	NC_000067.7:85684930-85686469	nuclear receptor subfamily 1%2C group H%2C member 3%2C transcript variant 2	NC_000068.8:91014405-91025461	22259	Nr1h3	GO:0003700	DNA binding transcription factor activity
TCONS_00001097	XM_030247023.1	0.742916	0.005635	TCONS_00001097	NC_000067.7:85684930-85686469	CBFA2/RUNX1 translocation partner 2%2C transcript variant X3	NC_000068.8:154278017-154381276	12396	Cbfa2t2	GO:0003700	DNA binding transcription factor activity
TCONS_00001097	NM_007891.5	0.839943	0.000628	TCONS_00001097	NC_000067.7:85684930-85686469	E2F transcription factor 1%2C transcript variant 1	NC_000068.8:154401319-154411812	13555	E2f1	GO:0003700	DNA binding transcription factor activity
TCONS_00001097	XM_030252805.1	0.725832	0.007531	TCONS_00001097	NC_000067.7:85684930-85686469	E74-like factor 2%2C transcript variant X11	NC_000069.7:51162705-51247682	69257	Elf2	GO:0003700	DNA binding transcription factor activity
TCONS_00001097	NM_019739.3	0.782836	0.002607	TCONS_00001097	NC_000067.7:85684930-85686469	forkhead box O1	NC_000069.7:52175757-52257530	56458	Foxo1	GO:0003700	DNA binding transcription factor activity
TCONS_00001097	NM_011281.3	0.788916	0.002287	TCONS_00001097	NC_000067.7:85684930-85686469	RAR-related orphan receptor gamma%2C transcript variant 1	NC_000069.7:94280100-94305583	19885	Rorc	GO:0003700	DNA binding transcription factor activity
TCONS_00001097	NM_001122953.1	0.725034	0.00763	TCONS_00001097	NC_000067.7:85684930-85686469	nuclear factor I/A%2C transcript variant 3	NC_000070.7:97665862-98007113	18027	Nfia	GO:0003700	DNA binding transcription factor activity
TCONS_00001097	NM_194060.1	0.789308	0.002268	TCONS_00001097	NC_000067.7:85684930-85686469	forkhead box O6	NC_000070.7:120124274-120144458	329934	Foxo6	GO:0003700	DNA binding transcription factor activity
TCONS_00001097	XM_006503134.4	0.791647	0.002154	TCONS_00001097	NC_000067.7:85684930-85686469	zinc finger and SCAN domains 20%2C transcript variant X5	NC_000070.7:128472343-128501962	269585	Zscan20	GO:0003700	DNA binding transcription factor activity
TCONS_00001097	XM_030253741.2	0.763494	0.003856	TCONS_00001097	NC_000067.7:85684930-85686469	arginine glutamic acid dipeptide (RE) repeats%2C transcript variant X2	NC_000070.7:150452812-150706423	68703	Rere	GO:0003700	DNA binding transcription factor activity
TCONS_00001097	NM_133906.4	0.82535	0.000947	TCONS_00001097	NC_000067.7:85684930-85686469	zinc finger with KRAB and SCAN domains 1%2C transcript variant 1	NC_000071.7:138083345-138106084	74570	Zkscan1	GO:0003700	DNA binding transcription factor activity
TCONS_00001097	XM_030255071.2	0.833266	0.000762	TCONS_00001097	NC_000067.7:85684930-85686469	forkhead box P1%2C transcript variant X36	NC_000072.7:98902302-99005269	108655	Foxp1	GO:0003700	DNA binding transcription factor activity
TCONS_00001097	XM_017321306.3	0.841283	0.000604	TCONS_00001097	NC_000067.7:85684930-85686469	forkhead box P1%2C transcript variant X27	NC_000072.7:98902302-99005279	108655	Foxp1	GO:0003700	DNA binding transcription factor activity
TCONS_00001097	NM_001127330.2	0.838789	0.00065	TCONS_00001097	NC_000067.7:85684930-85686469	peroxisome proliferator activated receptor gamma%2C transcript variant 1	NC_000072.7:115337911-115467362	19016	Pparg	GO:0003700	DNA binding transcription factor activity
TCONS_00001097	XM_036166087.1	0.704121	0.010587	TCONS_00001097	NC_000067.7:85684930-85686469	cAMP responsive element binding protein-like 2%2C transcript variant X2	NC_000072.7:134807422-134835894	232430	Crebl2	GO:0003700	DNA binding transcription factor activity
TCONS_00001097	NM_010155.3	-0.787289	0.00237	TCONS_00001097	NC_000067.7:85684930-85686469	Ets2 repressor factor	NC_000073.7:24941984-24950183	13875	Erf	GO:0003700	DNA binding transcription factor activity
TCONS_00001097	NM_009884.3	0.756706	0.004387	TCONS_00001097	NC_000067.7:85684930-85686469	CCAAT/enhancer binding protein (C/EBP)%2C gamma	NC_000073.7:34745846-34755991	12611	Cebpg	GO:0003700	DNA binding transcription factor activity
TCONS_00001097	NM_030693.2	0.724024	0.007757	TCONS_00001097	NC_000067.7:85684930-85686469	activating transcription factor 5%2C transcript variant 1	NC_000073.7:44461679-44465082	107503	Atf5	GO:0003700	DNA binding transcription factor activity
TCONS_00001097	XM_006541012.5	0.732858	0.006701	TCONS_00001097	NC_000067.7:85684930-85686469	sphingosine kinase 2%2C transcript variant X2	NC_000073.7:45359684-45364557	56632	Sphk2	GO:0003700	DNA binding transcription factor activity
TCONS_00001097	NM_016850.3	0.823742	0.000988	TCONS_00001097	NC_000067.7:85684930-85686469	interferon regulatory factor 7%2C transcript variant 1	NC_000073.7:140843095-140846337	54123	Irf7	GO:0003700	DNA binding transcription factor activity
TCONS_00001097	NM_010150.2	0.776097	0.003001	TCONS_00001097	NC_000067.7:85684930-85686469	nuclear receptor subfamily 2%2C group F%2C member 6	NC_000074.7:71826762-71834596	13864	Nr2f6	GO:0003700	DNA binding transcription factor activity
TCONS_00001097	TCONS_00012277	0.83797	0.000666	TCONS_00001097	NC_000067.7:85684930-85686469	TCONS_00012277	NC_000074.7:85435477-85526325	18032	Nfix	GO:0003700	DNA binding transcription factor activity
TCONS_00001097	XM_006531039.3	0.804399	0.001607	TCONS_00001097	NC_000067.7:85684930-85686469	heat shock transcription factor 4%2C transcript variant X3	NC_000074.7:105996560-106002473	26386	Hsf4	GO:0003700	DNA binding transcription factor activity
TCONS_00001097	NM_008542.3	0.782417	0.00263	TCONS_00001097	NC_000067.7:85684930-85686469	SMAD family member 6	NC_000075.7:63860357-63929341	17130	Smad6	GO:0003700	DNA binding transcription factor activity
TCONS_00001097	XM_006510971.4	0.729287	0.007114	TCONS_00001097	NC_000067.7:85684930-85686469	transcription factor Dp 2%2C transcript variant X13	NC_000075.7:96078524-96205699	211586	Tfdp2	GO:0003700	DNA binding transcription factor activity
TCONS_00001097	TCONS_00013920	0.916969	2.7e-05	TCONS_00001097	NC_000067.7:85684930-85686469	TCONS_00013920	NC_000075.7:122677987-122694972	235682	Zfp445	GO:0003700	DNA binding transcription factor activity
TCONS_00001097	TCONS_00013922	0.703091	0.010751	TCONS_00001097	NC_000067.7:85684930-85686469	TCONS_00013922	NC_000075.7:122677987-122695059	235682	Zfp445	GO:0003700	DNA binding transcription factor activity
TCONS_00001097	XM_006512565.5	0.705112	0.01043	TCONS_00001097	NC_000067.7:85684930-85686469	heat shock factor 2%2C transcript variant X2	NC_000076.7:57362703-57388966	15500	Hsf2	GO:0003700	DNA binding transcription factor activity
TCONS_00001097	XM_006513592.4	0.728847	0.007166	TCONS_00001097	NC_000067.7:85684930-85686469	nuclear receptor subfamily 2%2C group C%2C member 1%2C transcript variant X2	NC_000076.7:93983986-94033078	22025	Nr2c1	GO:0003700	DNA binding transcription factor activity
TCONS_00001097	NM_019963.2	0.799959	0.001784	TCONS_00001097	NC_000067.7:85684930-85686469	signal transducer and activator of transcription 2	NC_000076.7:128106366-128128722	20847	Stat2	GO:0003700	DNA binding transcription factor activity
TCONS_00001097	XM_030246031.1	0.78331	0.002581	TCONS_00001097	NC_000067.7:85684930-85686469	zinc finger with KRAB and SCAN domains 17%2C transcript variant X5	NC_000077.7:59376345-59396924	268417	Zkscan17	GO:0003700	DNA binding transcription factor activity
TCONS_00001097	NM_001130529.2	0.770821	0.003339	TCONS_00001097	NC_000067.7:85684930-85686469	zinc finger with KRAB and SCAN domains 17%2C transcript variant 2	NC_000077.7:59376345-59397466	268417	Zkscan17	GO:0003700	DNA binding transcription factor activity
TCONS_00001097	NM_001195003.1	0.835682	0.000711	TCONS_00001097	NC_000067.7:85684930-85686469	K(lysine) acetyltransferase 7%2C transcript variant 1	NC_000077.7:95162678-95201072	217127	Kat7	GO:0003700	DNA binding transcription factor activity
TCONS_00001097	NM_145434.4	-0.762144	0.003958	TCONS_00001097	NC_000067.7:85684930-85686469	nuclear receptor subfamily 1%2C group D%2C member 1	NC_000077.7:98658757-98666203	217166	Nr1d1	GO:0003700	DNA binding transcription factor activity
TCONS_00001097	NM_011489.3	0.88905	0.00011	TCONS_00001097	NC_000067.7:85684930-85686469	signal transducer and activator of transcription 5B%2C transcript variant 1	NC_000077.7:100671556-100713396	20851	Stat5b	GO:0003700	DNA binding transcription factor activity
TCONS_00001097	NM_001113563.2	0.775975	0.003008	TCONS_00001097	NC_000067.7:85684930-85686469	signal transducer and activator of transcription 5B%2C transcript variant 2	NC_000077.7:100671556-100741407	20851	Stat5b	GO:0003700	DNA binding transcription factor activity
TCONS_00001097	NM_011488.3	0.902099	6e-05	TCONS_00001097	NC_000067.7:85684930-85686469	signal transducer and activator of transcription 5A%2C transcript variant 1	NC_000077.7:100750176-100775995	20850	Stat5a	GO:0003700	DNA binding transcription factor activity
TCONS_00001097	NM_033270.2	0.848716	0.000481	TCONS_00001097	NC_000067.7:85684930-85686469	E2F transcription factor 6%2C transcript variant 1	NC_000078.7:16860965-16876753	50496	E2f6	GO:0003700	DNA binding transcription factor activity
TCONS_00001097	XM_006514968.5	-0.747503	0.005194	TCONS_00001097	NC_000067.7:85684930-85686469	ets variant 1%2C transcript variant X4	NC_000078.7:38829654-38920484	14009	Etv1	GO:0003700	DNA binding transcription factor activity
TCONS_00001097	XM_017315205.2	0.870622	0.000229	TCONS_00001097	NC_000067.7:85684930-85686469	forkhead box N3%2C transcript variant X11	NC_000078.7:99156339-99359248	71375	Foxn3	GO:0003700	DNA binding transcription factor activity
TCONS_00001097	NM_017373.3	0.847057	0.000507	TCONS_00001097	NC_000067.7:85684930-85686469	nuclear factor%2C interleukin 3%2C regulated	NC_000079.7:53121244-53135075	18030	Nfil3	GO:0003700	DNA binding transcription factor activity
TCONS_00001097	XM_036158539.1	0.872078	0.000217	TCONS_00001097	NC_000067.7:85684930-85686469	thyroid hormone receptor beta%2C transcript variant X19	NC_000080.7:4429598-4810538	21834	Thrb	GO:0003700	DNA binding transcription factor activity
TCONS_00001097	NM_011243.2	0.73921	0.006012	TCONS_00001097	NC_000067.7:85684930-85686469	retinoic acid receptor%2C beta%2C transcript variant beta2	NC_000080.7:5894286-6038924	218772	Rarb	GO:0003700	DNA binding transcription factor activity
TCONS_00001097	NM_001159417.1	0.827146	0.000902	TCONS_00001097	NC_000067.7:85684930-85686469	interferon regulatory factor 9%2C transcript variant 1	NC_000080.7:55841441-55847487	16391	Irf9	GO:0003700	DNA binding transcription factor activity
TCONS_00001097	NM_009366.4	0.73127	0.006882	TCONS_00001097	NC_000067.7:85684930-85686469	TSC22 domain family%2C member 1%2C transcript variant 2	NC_000080.7:76741949-76745205	21807	Tsc22d1	GO:0003700	DNA binding transcription factor activity
TCONS_00001097	NM_001357926.1	0.815791	0.001215	TCONS_00001097	NC_000067.7:85684930-85686469	metadherin%2C transcript variant 1	NC_000081.7:34082864-34143683	67154	Mtdh	GO:0003700	DNA binding transcription factor activity
TCONS_00001097	XM_036159165.1	0.772427	0.003233	TCONS_00001097	NC_000067.7:85684930-85686469	heat shock factor 1%2C transcript variant X3	NC_000081.7:76361648-76385176	15499	Hsf1	GO:0003700	DNA binding transcription factor activity
TCONS_00001097	XM_030248421.2	0.89485	8.5e-05	TCONS_00001097	NC_000067.7:85684930-85686469	peroxisome proliferator activated receptor alpha%2C transcript variant X9	NC_000081.7:85619621-85691052	19013	Ppara	GO:0003700	DNA binding transcription factor activity
TCONS_00001097	NM_008065.2	-0.840918	0.00061	TCONS_00001097	NC_000067.7:85684930-85686469	GA repeat binding protein%2C alpha	NC_000082.7:84632011-84660667	14390	Gabpa	GO:0003700	DNA binding transcription factor activity
TCONS_00001097	NM_011145.3	0.709319	0.009784	TCONS_00001097	NC_000067.7:85684930-85686469	peroxisome proliferator activator receptor delta	NC_000083.7:28451727-28520443	19015	Ppard	GO:0003700	DNA binding transcription factor activity
TCONS_00001097	TCONS_00022266	0.795218	0.001988	TCONS_00001097	NC_000067.7:85684930-85686469	TCONS_00022266	NC_000083.7:34247248-34257377	20182	Rxrb	GO:0003700	DNA binding transcription factor activity
TCONS_00001097	NM_017406.4	0.77145	0.003297	TCONS_00001097	NC_000067.7:85684930-85686469	activating transcription factor 6 beta	NC_000083.7:34866119-34874048	12915	Atf6b	GO:0003700	DNA binding transcription factor activity
TCONS_00001097	NM_028767.2	-0.740336	0.005895	TCONS_00001097	NC_000067.7:85684930-85686469	forkhead box P4%2C transcript variant 3	NC_000083.7:48178057-48235557	74123	Foxp4	GO:0003700	DNA binding transcription factor activity
TCONS_00001097	XM_030249554.2	0.775576	0.003033	TCONS_00001097	NC_000067.7:85684930-85686469	nuclear transcription factor-Y alpha%2C transcript variant X7	NC_000083.7:48693912-48716815	18044	Nfya	GO:0003700	DNA binding transcription factor activity
TCONS_00001097	NM_010913.2	0.947297	3e-06	TCONS_00001097	NC_000067.7:85684930-85686469	nuclear transcription factor-Y alpha%2C transcript variant 2	NC_000083.7:48693912-48716848	18044	Nfya	GO:0003700	DNA binding transcription factor activity
TCONS_00001097	NM_001369357.1	0.788443	0.002311	TCONS_00001097	NC_000067.7:85684930-85686469	TATA-box binding protein associated factor 4b%2C transcript variant 2	NC_000084.7:14916301-15035160	72504	Taf4b	GO:0003700	DNA binding transcription factor activity
TCONS_00001097	NM_001357447.1	0.719869	0.008294	TCONS_00001097	NC_000067.7:85684930-85686469	zinc finger protein 24%2C transcript variant 2	NC_000084.7:24142773-24153427	59057	Zfp24	GO:0003700	DNA binding transcription factor activity
TCONS_00001097	NM_001364967.1	0.810439	0.001389	TCONS_00001097	NC_000067.7:85684930-85686469	SMAD family member 4%2C transcript variant 2	NC_000084.7:73767860-73836862	17128	Smad4	GO:0003700	DNA binding transcription factor activity
TCONS_00001097	XM_006525701.4	0.741995	0.005727	TCONS_00001097	NC_000067.7:85684930-85686469	SMAD family member 4%2C transcript variant X2	NC_000084.7:73769250-73836640	17128	Smad4	GO:0003700	DNA binding transcription factor activity
TCONS_00001097	XM_006525703.3	0.794865	0.002004	TCONS_00001097	NC_000067.7:85684930-85686469	SMAD family member 7%2C transcript variant X1	NC_000084.7:75501599-75529006	17131	Smad7	GO:0003700	DNA binding transcription factor activity
TCONS_00001097	NM_007953.2	0.72983	0.00705	TCONS_00001097	NC_000067.7:85684930-85686469	estrogen related receptor%2C alpha	NC_000085.7:6888344-6899176	26379	Esrra	GO:0003700	DNA binding transcription factor activity
TCONS_00001097	XM_036162179.1	0.817655	0.001159	TCONS_00001097	NC_000067.7:85684930-85686469	activating transcription factor 1%2C pseudogene	NC_000086.8:52885449-52886480	100040260	Atf1-ps	GO:0003700	DNA binding transcription factor activity
XR_004936217.1	TCONS_00000786	0.713103	0.009228	uncharacterized LOC118567764	NC_000067.7:86030338-86038963	TCONS_00000786	NC_000067.7:13209348-13444303	17978	Ncoa2	GO:0000988	transcription factor activity, protein binding
XR_004936217.1	XM_030252077.2	0.878951	0.000166	uncharacterized LOC118567764	NC_000067.7:86030338-86038963	nuclear receptor coactivator 2%2C transcript variant X11	NC_000067.7:13212641-13364673	17978	Ncoa2	GO:0000988	transcription factor activity, protein binding
XR_004936217.1	NM_001357627.1	0.714108	0.009085	uncharacterized LOC118567764	NC_000067.7:86030338-86038963	signal transducer and activator of transcription 1%2C transcript variant 4	NC_000067.7:52158596-52201024	20846	Stat1	GO:0003700	DNA binding transcription factor activity
XR_004936217.1	NM_009107.3	-0.744108	0.005518	uncharacterized LOC118567764	NC_000067.7:86030338-86038963	retinoid X receptor gamma%2C transcript variant 1	NC_000067.7:167425930-167467192	20183	Rxrg	GO:0003700	DNA binding transcription factor activity
XR_004936217.1	NM_001159731.1	0.878549	0.000169	uncharacterized LOC118567764	NC_000067.7:86030338-86038963	retinoid X receptor gamma%2C transcript variant 2	NC_000067.7:167445833-167467192	20183	Rxrg	GO:0003700	DNA binding transcription factor activity
XR_004936217.1	NM_183355.3	0.825912	0.000933	uncharacterized LOC118567764	NC_000067.7:86030338-86038963	pre B cell leukemia homeobox 1%2C transcript variant a	NC_000067.7:167981095-168259738	18514	Pbx1	GO:0003700	DNA binding transcription factor activity
XR_004936217.1	NM_001081304.1	0.727723	0.007301	uncharacterized LOC118567764	NC_000067.7:86030338-86038963	activating transcription factor 6	NC_000067.7:170532025-170695340	226641	Atf6	GO:0003700	DNA binding transcription factor activity
XR_004936217.1	NM_011305.3	0.743973	0.005531	uncharacterized LOC118567764	NC_000067.7:86030338-86038963	retinoid X receptor alpha%2C transcript variant 1	NC_000068.8:27567212-27653331	20181	Rxra	GO:0003700	DNA binding transcription factor activity
XR_004936217.1	NM_178778.3	0.814686	0.001249	uncharacterized LOC118567764	NC_000067.7:86030338-86038963	suppressor of cancer cell invasion	NC_000068.8:38956225-39080742	320271	Scai	GO:0000988	transcription factor activity, protein binding
XR_004936217.1	XM_036157713.1	0.866504	0.000266	uncharacterized LOC118567764	NC_000067.7:86030338-86038963	activating transcription factor 2%2C transcript variant X23	NC_000068.8:73660896-73722972	11909	Atf2	GO:0003700	DNA binding transcription factor activity
XR_004936217.1	XM_006499689.3	0.750674	0.004904	uncharacterized LOC118567764	NC_000067.7:86030338-86038963	MAX gene associated%2C transcript variant X3	NC_000068.8:119702993-119800610	29808	Mga	GO:0003700	DNA binding transcription factor activity
XR_004936217.1	XM_011239589.4	0.777961	0.002888	uncharacterized LOC118567764	NC_000067.7:86030338-86038963	MAX gene associated%2C transcript variant X8	NC_000068.8:119716771-119800610	29808	Mga	GO:0003700	DNA binding transcription factor activity
XR_004936217.1	NM_020255.3	-0.888679	0.000111	uncharacterized LOC118567764	NC_000067.7:86030338-86038963	SCAN domain-containing 1	NC_000068.8:156153765-156154624	19018	Scand1	GO:0003700	DNA binding transcription factor activity
XR_004936217.1	NM_007892.2	0.784136	0.002536	uncharacterized LOC118567764	NC_000067.7:86030338-86038963	E2F transcription factor 5	NC_000069.7:14643730-14671369	13559	E2f5	GO:0003700	DNA binding transcription factor activity
XR_004936217.1	TCONS_00003816	0.724375	0.007712	uncharacterized LOC118567764	NC_000067.7:86030338-86038963	TCONS_00003816	NC_000069.7:52175757-52235699	56458	Foxo1	GO:0003700	DNA binding transcription factor activity
XR_004936217.1	NM_019739.3	0.726146	0.007492	uncharacterized LOC118567764	NC_000067.7:86030338-86038963	forkhead box O1	NC_000069.7:52175757-52257530	56458	Foxo1	GO:0003700	DNA binding transcription factor activity
XR_004936217.1	NM_023214.7	0.960513	1e-06	uncharacterized LOC118567764	NC_000067.7:86030338-86038963	solute carrier family 30 (zinc transporter)%2C member 7	NC_000069.7:115732621-115801055	66500	Slc30a7	GO:0003700	DNA binding transcription factor activity
XR_004936217.1	XM_036163227.1	0.775692	0.003026	uncharacterized LOC118567764	NC_000067.7:86030338-86038963	solute carrier family 30 (zinc transporter)%2C member 7%2C transcript variant X1	NC_000069.7:115765490-115801079	66500	Slc30a7	GO:0003700	DNA binding transcription factor activity
XR_004936217.1	NM_008689.2	0.838352	0.000658	uncharacterized LOC118567764	NC_000067.7:86030338-86038963	nuclear factor of kappa light polypeptide gene enhancer in B cells 1%2C p105	NC_000069.7:135290415-135397308	18033	Nfkb1	GO:0003700	DNA binding transcription factor activity
XR_004936217.1	NM_013497.4	0.951843	2e-06	uncharacterized LOC118567764	NC_000067.7:86030338-86038963	cAMP responsive element binding protein 3	NC_000070.7:43562657-43567061	12913	Creb3	GO:0003700	DNA binding transcription factor activity
XR_004936217.1	NM_008687.6	0.827364	0.000897	uncharacterized LOC118567764	NC_000067.7:86030338-86038963	nuclear factor I/B%2C transcript variant 3	NC_000070.7:82208409-82424016	18028	Nfib	GO:0003700	DNA binding transcription factor activity
XR_004936217.1	XM_006537654.3	0.728471	0.007211	uncharacterized LOC118567764	NC_000067.7:86030338-86038963	nuclear factor I/B%2C transcript variant X2	NC_000070.7:82208409-82424988	18028	Nfib	GO:0003700	DNA binding transcription factor activity
XR_004936217.1	NM_029868.3	0.834185	0.000742	uncharacterized LOC118567764	NC_000067.7:86030338-86038963	GC-rich promoter binding protein 1-like 1%2C transcript variant 1	NC_000070.7:116414854-116451099	77110	Gpbp1l1	GO:0003700	DNA binding transcription factor activity
XR_004936217.1	NM_001290696.1	0.892547	9.4e-05	uncharacterized LOC118567764	NC_000067.7:86030338-86038963	forkhead box J3%2C transcript variant 2	NC_000070.7:119396857-119486316	230700	Foxj3	GO:0003700	DNA binding transcription factor activity
XR_004936217.1	XM_030253743.2	-0.760274	0.004102	uncharacterized LOC118567764	NC_000067.7:86030338-86038963	arginine glutamic acid dipeptide (RE) repeats%2C transcript variant X4	NC_000070.7:150365371-150706423	68703	Rere	GO:0003700	DNA binding transcription factor activity
XR_004936217.1	XM_030253751.2	-0.762974	0.003895	uncharacterized LOC118567764	NC_000067.7:86030338-86038963	arginine glutamic acid dipeptide (RE) repeats%2C transcript variant X15	NC_000070.7:150561931-150706423	68703	Rere	GO:0003700	DNA binding transcription factor activity
XR_004936217.1	XM_036164921.1	0.754672	0.004557	uncharacterized LOC118567764	NC_000067.7:86030338-86038963	recombination signal binding protein for immunoglobulin kappa J region%2C transcript variant X4	NC_000071.7:53759203-53814703	19664	Rbpj	GO:0003700	DNA binding transcription factor activity
XR_004936217.1	XM_006503796.5	0.847722	0.000496	uncharacterized LOC118567764	NC_000067.7:86030338-86038963	recombination signal binding protein for immunoglobulin kappa J region%2C transcript variant X1	NC_000071.7:53766547-53814703	19664	Rbpj	GO:0003700	DNA binding transcription factor activity
XR_004936217.1	NM_133921.3	0.714574	0.009019	uncharacterized LOC118567764	NC_000067.7:86030338-86038963	nuclear transcription factor%2C X-box binding-like 1%2C transcript variant 1	NC_000071.7:72670646-72716988	100978	Nfxl1	GO:0003700	DNA binding transcription factor activity
XR_004936217.1	XM_006504628.4	0.815351	0.001229	uncharacterized LOC118567764	NC_000067.7:86030338-86038963	zinc finger with KRAB and SCAN domains 1%2C transcript variant X1	NC_000071.7:138083311-138106084	74570	Zkscan1	GO:0003700	DNA binding transcription factor activity
XR_004936217.1	NM_016683.2	0.880719	0.000155	uncharacterized LOC118567764	NC_000067.7:86030338-86038963	zinc finger with KRAB and SCAN domains 5%2C transcript variant 1	NC_000071.7:145141368-145158560	22757	Zkscan5	GO:0003700	DNA binding transcription factor activity
XR_004936217.1	XM_036166039.1	0.784622	0.00251	uncharacterized LOC118567764	NC_000067.7:86030338-86038963	cAMP responsive element binding protein 5%2C transcript variant X1	NC_000072.7:53264153-53673025	231991	Creb5	GO:0003700	DNA binding transcription factor activity
XR_004936217.1	XM_006505906.5	0.769701	0.003414	uncharacterized LOC118567764	NC_000067.7:86030338-86038963	nuclear receptor subfamily 2%2C group C%2C member 2%2C transcript variant X4	NC_000072.7:92068483-92148962	22026	Nr2c2	GO:0003700	DNA binding transcription factor activity
XR_004936217.1	TCONS_00009475	0.852537	0.000426	uncharacterized LOC118567764	NC_000067.7:86030338-86038963	TCONS_00009475	NC_000073.7:12531329-12532991	232875	Zscan18	GO:0003700	DNA binding transcription factor activity
XR_004936217.1	NM_022981.5	0.759476	0.004164	uncharacterized LOC118567764	NC_000067.7:86030338-86038963	zinc finger protein 110%2C transcript variant 2	NC_000073.7:12568687-12584513	65020	Zfp110	GO:0003700	DNA binding transcription factor activity
XR_004936217.1	TCONS_00010406	0.85958	0.000338	uncharacterized LOC118567764	NC_000067.7:86030338-86038963	TCONS_00010406	NC_000073.7:19339987-19354009	19698	Relb	GO:0003700	DNA binding transcription factor activity
XR_004936217.1	TCONS_00010553	0.90977	4e-05	uncharacterized LOC118567764	NC_000067.7:86030338-86038963	TCONS_00010553	NC_000073.7:34611846-34755991	12611	Cebpg	GO:0003700	DNA binding transcription factor activity
XR_004936217.1	TCONS_00010633	0.766612	0.003629	uncharacterized LOC118567764	NC_000067.7:86030338-86038963	TCONS_00010633	NC_000073.7:45354305-45370301	56632	Sphk2	GO:0003700	DNA binding transcription factor activity
XR_004936217.1	XM_006507606.2	0.745527	0.00538	uncharacterized LOC118567764	NC_000067.7:86030338-86038963	CREB/ATF bZIP transcription factor%2C transcript variant X1	NC_000073.7:90091941-90097590	233490	Crebzf	GO:0003700	DNA binding transcription factor activity
XR_004936217.1	NM_145151.3	0.911314	3.7e-05	uncharacterized LOC118567764	NC_000067.7:86030338-86038963	CREB/ATF bZIP transcription factor%2C transcript variant 1	NC_000073.7:90091988-90097251	233490	Crebzf	GO:0003700	DNA binding transcription factor activity
XR_004936217.1	NM_001166585.2	0.775663	0.003027	uncharacterized LOC118567764	NC_000067.7:86030338-86038963	TEA domain family member 1%2C transcript variant 3	NC_000073.7:112278562-112505991	21676	Tead1	GO:0003700	DNA binding transcription factor activity
XR_004936217.1	XM_011242265.3	0.841074	0.000608	uncharacterized LOC118567764	NC_000067.7:86030338-86038963	nuclear receptor subfamily 2%2C group F%2C member 6%2C transcript variant X4	NC_000074.7:71826761-71831012	13864	Nr2f6	GO:0003700	DNA binding transcription factor activity
XR_004936217.1	NM_010150.2	0.745642	0.005369	uncharacterized LOC118567764	NC_000067.7:86030338-86038963	nuclear receptor subfamily 2%2C group F%2C member 6	NC_000074.7:71826762-71834596	13864	Nr2f6	GO:0003700	DNA binding transcription factor activity
XR_004936217.1	NM_008539.4	0.827814	0.000886	uncharacterized LOC118567764	NC_000067.7:86030338-86038963	SMAD family member 1	NC_000074.7:80065023-80126057	17125	Smad1	GO:0003700	DNA binding transcription factor activity
XR_004936217.1	XM_036153804.1	-0.700799	0.011125	uncharacterized LOC118567764	NC_000067.7:86030338-86038963	nuclear factor I/X%2C transcript variant X20	NC_000074.7:85431345-85527086	18032	Nfix	GO:0003700	DNA binding transcription factor activity
XR_004936217.1	NM_001161458.1	0.733181	0.006665	uncharacterized LOC118567764	NC_000067.7:86030338-86038963	core binding factor beta%2C transcript variant 4	NC_000074.7:105897305-105944621	12400	Cbfb	GO:0000988	transcription factor activity, protein binding
XR_004936217.1	NM_001033161.2	0.84938	0.000471	uncharacterized LOC118567764	NC_000067.7:86030338-86038963	TNFRSF1A-associated via death domain	NC_000074.7:105985206-105991226	71609	Tradd	GO:0003700	DNA binding transcription factor activity
XR_004936217.1	NM_010901.3	0.779302	0.002808	uncharacterized LOC118567764	NC_000067.7:86030338-86038963	nuclear factor of activated T cells%2C cytoplasmic%2C calcineurin dependent 3%2C transcript variant 1	NC_000074.7:106786221-106857169	18021	Nfatc3	GO:0003700	DNA binding transcription factor activity
XR_004936217.1	TCONS_00011736	0.753316	0.004672	uncharacterized LOC118567764	NC_000067.7:86030338-86038963	TCONS_00011736	NC_000074.7:108020101-108106142	54446	Nfat5	GO:0003700	DNA binding transcription factor activity
XR_004936217.1	NM_001301811.1	0.815581	0.001222	uncharacterized LOC118567764	NC_000067.7:86030338-86038963	interferon regulatory factor 8%2C transcript variant 1	NC_000074.7:121465377-121483433	15900	Irf8	GO:0003700	DNA binding transcription factor activity
XR_004936217.1	TCONS_00012478	0.785955	0.002439	uncharacterized LOC118567764	NC_000067.7:86030338-86038963	TCONS_00012478	NC_000074.7:123351876-123404914	12398	Cbfa2t3	GO:0003700	DNA binding transcription factor activity
XR_004936217.1	NM_008026.5	0.78213	0.002646	uncharacterized LOC118567764	NC_000067.7:86030338-86038963	Friend leukemia integration 1	NC_000075.7:32333499-32452748	14247	Fli1	GO:0003700	DNA binding transcription factor activity
XR_004936217.1	NM_001372534.1	0.805732	0.001557	uncharacterized LOC118567764	NC_000067.7:86030338-86038963	E26 avian leukemia oncogene 1%2C 5' domain%2C transcript variant 3	NC_000075.7:32547536-32669116	23871	Ets1	GO:0003700	DNA binding transcription factor activity
XR_004936217.1	NM_001359464.1	0.806899	0.001514	uncharacterized LOC118567764	NC_000067.7:86030338-86038963	zinc finger protein 202%2C transcript variant 2	NC_000075.7:40103611-40124900	80902	Zfp202	GO:0003700	DNA binding transcription factor activity
XR_004936217.1	NM_016769.4	0.729169	0.007128	uncharacterized LOC118567764	NC_000067.7:86030338-86038963	SMAD family member 3	NC_000075.7:63554048-63665276	17127	Smad3	GO:0003700	DNA binding transcription factor activity
XR_004936217.1	NM_183316.2	-0.86015	0.000332	uncharacterized LOC118567764	NC_000067.7:86030338-86038963	small nuclear RNA activating complex%2C polypeptide 5	NC_000075.7:64086578-64089970	330959	Snapc5	GO:0003700	DNA binding transcription factor activity
XR_004936217.1	NM_023814.4	0.925578	1.6e-05	uncharacterized LOC118567764	NC_000067.7:86030338-86038963	T-box18	NC_000075.7:87584852-87613313	76365	Tbx18	GO:0003700	DNA binding transcription factor activity
XR_004936217.1	NM_026756.2	-0.717559	0.008605	uncharacterized LOC118567764	NC_000067.7:86030338-86038963	nuclear factor I/C%2C transcript variant 2	NC_000076.7:81232024-81263007	18029	Nfic	GO:0003700	DNA binding transcription factor activity
XR_004936217.1	XM_030244940.1	-0.769875	0.003403	uncharacterized LOC118567764	NC_000067.7:86030338-86038963	nuclear factor I/C%2C transcript variant X2	NC_000076.7:81232024-81267753	18029	Nfic	GO:0003700	DNA binding transcription factor activity
XR_004936217.1	NM_009284.2	0.841203	0.000605	uncharacterized LOC118567764	NC_000067.7:86030338-86038963	signal transducer and activator of transcription 6	NC_000076.7:127478854-127496856	20852	Stat6	GO:0003700	DNA binding transcription factor activity
XR_004936217.1	NM_013842.3	0.897551	7.5e-05	uncharacterized LOC118567764	NC_000067.7:86030338-86038963	X-box binding protein 1%2C transcript variant 1	NC_000077.7:5470640-5475993	22433	Xbp1	GO:0003700	DNA binding transcription factor activity
XR_004936217.1	NM_007840.3	0.884024	0.000136	uncharacterized LOC118567764	NC_000067.7:86030338-86038963	DEAD box helicase 5	NC_000077.7:106671181-106679320	13207	Ddx5	GO:0000988	transcription factor activity, protein binding
XR_004936217.1	TCONS_00017083	0.821589	0.001046	uncharacterized LOC118567764	NC_000067.7:86030338-86038963	TCONS_00017083	NC_000077.7:106673520-106679733	13207	Ddx5	GO:0000988	transcription factor activity, protein binding
XR_004936217.1	XM_006514969.5	0.722479	0.007953	uncharacterized LOC118567764	NC_000067.7:86030338-86038963	ets variant 1%2C transcript variant X7	NC_000078.7:38869473-38920484	14009	Etv1	GO:0003700	DNA binding transcription factor activity
XR_004936217.1	XM_030247246.2	0.783254	0.002584	uncharacterized LOC118567764	NC_000067.7:86030338-86038963	zinc finger and SCAN domain containing 12%2C transcript variant X1	NC_000079.7:21546981-21556458	22758	Zscan12	GO:0003700	DNA binding transcription factor activity
XR_004936217.1	NM_016684.2	-0.735279	0.006432	uncharacterized LOC118567764	NC_000067.7:86030338-86038963	zinc finger and SCAN domain containing 12	NC_000079.7:21546989-21556472	22758	Zscan12	GO:0003700	DNA binding transcription factor activity
XR_004936217.1	NM_001039115.2	0.712385	0.009332	uncharacterized LOC118567764	NC_000067.7:86030338-86038963	zinc finger with KRAB and SCAN domains 4	NC_000079.7:21663018-21669677	544922	Zkscan4	GO:0003700	DNA binding transcription factor activity
XR_004936217.1	NM_010151.3	0.750534	0.004917	uncharacterized LOC118567764	NC_000067.7:86030338-86038963	nuclear receptor subfamily 2%2C group F%2C member 1%2C transcript variant 1	NC_000079.7:78337091-78346992	13865	Nr2f1	GO:0003700	DNA binding transcription factor activity
XR_004936217.1	NM_001361924.1	0.705729	0.010333	uncharacterized LOC118567764	NC_000067.7:86030338-86038963	GC-rich promoter binding protein 1%2C transcript variant 4	NC_000079.7:111562213-111626661	73274	Gpbp1	GO:0003700	DNA binding transcription factor activity
XR_004936217.1	NM_011243.2	0.76068	0.00407	uncharacterized LOC118567764	NC_000067.7:86030338-86038963	retinoic acid receptor%2C beta%2C transcript variant beta2	NC_000080.7:5894286-6038924	218772	Rarb	GO:0003700	DNA binding transcription factor activity
XR_004936217.1	NM_009366.4	0.758991	0.004203	uncharacterized LOC118567764	NC_000067.7:86030338-86038963	TSC22 domain family%2C member 1%2C transcript variant 2	NC_000080.7:76741949-76745205	21807	Tsc22d1	GO:0003700	DNA binding transcription factor activity
XR_004936217.1	NM_007920.4	0.806213	0.001539	uncharacterized LOC118567764	NC_000067.7:86030338-86038963	E74-like factor 1%2C transcript variant 1	NC_000080.7:79718633-79819931	13709	Elf1	GO:0003700	DNA binding transcription factor activity
XR_004936217.1	XM_017316729.3	0.80539	0.001569	uncharacterized LOC118567764	NC_000067.7:86030338-86038963	metadherin%2C transcript variant X4	NC_000081.7:34082612-34143683	67154	Mtdh	GO:0003700	DNA binding transcription factor activity
XR_004936217.1	NM_032000.2	0.774588	0.003095	uncharacterized LOC118567764	NC_000067.7:86030338-86038963	transcriptional repressor GATA binding 1%2C transcript variant 2	NC_000081.7:50518152-50753437	83925	Trps1	GO:0003700	DNA binding transcription factor activity
XR_004936217.1	NM_009716.3	0.760749	0.004065	uncharacterized LOC118567764	NC_000067.7:86030338-86038963	activating transcription factor 4%2C transcript variant 1	NC_000081.7:80139384-80141746	11911	Atf4	GO:0003700	DNA binding transcription factor activity
XR_004936217.1	NM_177821.6	0.720168	0.008255	uncharacterized LOC118567764	NC_000067.7:86030338-86038963	E1A binding protein p300	NC_000081.7:81470414-81536278	328572	Ep300	GO:0000988	transcription factor activity, protein binding
XR_004936217.1	TCONS_00020420	0.7297	0.007065	uncharacterized LOC118567764	NC_000067.7:86030338-86038963	TCONS_00020420	NC_000081.7:81686912-81711064	21685	Tef	GO:0003700	DNA binding transcription factor activity
XR_004936217.1	XM_011245517.4	-0.731262	0.006883	uncharacterized LOC118567764	NC_000067.7:86030338-86038963	peroxisome proliferator activated receptor alpha%2C transcript variant X3	NC_000081.7:85619111-85691052	19013	Ppara	GO:0003700	DNA binding transcription factor activity
XR_004936217.1	NM_007497.3	0.92374	1.8e-05	uncharacterized LOC118567764	NC_000067.7:86030338-86038963	activating transcription factor 1	NC_000081.7:100125739-100159129	11908	Atf1	GO:0003700	DNA binding transcription factor activity
XR_004936217.1	XM_006520351.5	0.823033	0.001007	uncharacterized LOC118567764	NC_000067.7:86030338-86038963	activating transcription factor 1%2C transcript variant X1	NC_000081.7:100126109-100159129	11908	Atf1	GO:0003700	DNA binding transcription factor activity
XR_004936217.1	NM_148924.3	0.77084	0.003338	uncharacterized LOC118567764	NC_000067.7:86030338-86038963	zinc finger protein 263	NC_000082.7:3561962-3568652	74120	Zfp263	GO:0003700	DNA binding transcription factor activity
XR_004936217.1	NM_001081217.1	0.853755	0.00041	uncharacterized LOC118567764	NC_000067.7:86030338-86038963	zinc finger protein 174	NC_000082.7:3665086-3676744	385674	Zfp174	GO:0003700	DNA binding transcription factor activity
XR_004936217.1	XM_006521754.5	0.767553	0.003563	uncharacterized LOC118567764	NC_000067.7:86030338-86038963	CREB binding protein%2C transcript variant X4	NC_000082.7:3899197-4031864	12914	Crebbp	GO:0000988	transcription factor activity, protein binding
XR_004936217.1	NM_001025432.1	-0.844636	0.000546	uncharacterized LOC118567764	NC_000067.7:86030338-86038963	CREB binding protein	NC_000082.7:3901911-4031268	12914	Crebbp	GO:0000988	transcription factor activity, protein binding
XR_004936217.1	NM_023794.2	0.761599	0.003999	uncharacterized LOC118567764	NC_000067.7:86030338-86038963	ets variant 5%2C transcript variant 2	NC_000082.7:22200062-22258320	104156	Etv5	GO:0003700	DNA binding transcription factor activity
XR_004936217.1	NM_011809.3	0.901706	6.1e-05	uncharacterized LOC118567764	NC_000067.7:86030338-86038963	E26 avian leukemia oncogene 2%2C 3' domain	NC_000082.7:95503273-95522093	23872	Ets2	GO:0003700	DNA binding transcription factor activity
XR_004936217.1	NM_001033496.3	0.830026	0.000834	uncharacterized LOC118567764	NC_000067.7:86030338-86038963	zinc finger protein 213	NC_000083.7:23775740-23783200	449521	Zfp213	GO:0003700	DNA binding transcription factor activity
XR_004936217.1	TCONS_00022266	0.764772	0.003762	uncharacterized LOC118567764	NC_000067.7:86030338-86038963	TCONS_00022266	NC_000083.7:34247248-34257377	20182	Rxrb	GO:0003700	DNA binding transcription factor activity
XR_004936217.1	NM_001205214.1	-0.751057	0.00487	uncharacterized LOC118567764	NC_000067.7:86030338-86038963	retinoid X receptor beta%2C transcript variant 1	NC_000083.7:34250785-34257377	20182	Rxrb	GO:0003700	DNA binding transcription factor activity
XR_004936217.1	NM_011306.4	-0.826488	0.000918	uncharacterized LOC118567764	NC_000067.7:86030338-86038963	retinoid X receptor beta%2C transcript variant 2	NC_000083.7:34250785-34257377	20182	Rxrb	GO:0003700	DNA binding transcription factor activity
XR_004936217.1	NM_001357447.1	0.795468	0.001977	uncharacterized LOC118567764	NC_000067.7:86030338-86038963	zinc finger protein 24%2C transcript variant 2	NC_000084.7:24142773-24153427	59057	Zfp24	GO:0003700	DNA binding transcription factor activity
XR_004936217.1	NM_001357448.1	0.855951	0.000382	uncharacterized LOC118567764	NC_000067.7:86030338-86038963	zinc finger protein 24%2C transcript variant 3	NC_000084.7:24142773-24153427	59057	Zfp24	GO:0003700	DNA binding transcription factor activity
XR_004936217.1	NM_001361211.1	0.866266	0.000268	uncharacterized LOC118567764	NC_000067.7:86030338-86038963	nuclear receptor subfamily 3%2C group C%2C member 1%2C transcript variant 4	NC_000084.7:39543597-39622829	14815	Nr3c1	GO:0003700	DNA binding transcription factor activity
XR_004936217.1	NM_001361209.1	0.760288	0.0041	uncharacterized LOC118567764	NC_000067.7:86030338-86038963	nuclear receptor subfamily 3%2C group C%2C member 1%2C transcript variant 2	NC_000084.7:39543597-39623723	14815	Nr3c1	GO:0003700	DNA binding transcription factor activity
XR_004936217.1	XM_006525665.5	0.706239	0.010254	uncharacterized LOC118567764	NC_000067.7:86030338-86038963	nuclear receptor subfamily 3%2C group C%2C member 1%2C transcript variant X4	NC_000084.7:39545027-39622582	14815	Nr3c1	GO:0003700	DNA binding transcription factor activity
XR_004936217.1	NM_001164110.1	0.760123	0.004113	uncharacterized LOC118567764	NC_000067.7:86030338-86038963	nuclear factor of activated T cells%2C cytoplasmic%2C calcineurin dependent 1%2C transcript variant 4	NC_000084.7:80649419-80756286	18018	Nfatc1	GO:0003700	DNA binding transcription factor activity
XR_004936217.1	NM_001164109.1	0.703496	0.010686	uncharacterized LOC118567764	NC_000067.7:86030338-86038963	nuclear factor of activated T cells%2C cytoplasmic%2C calcineurin dependent 1%2C transcript variant 3	NC_000084.7:80690649-80756286	18018	Nfatc1	GO:0003700	DNA binding transcription factor activity
XR_004936217.1	NM_007953.2	0.779236	0.002812	uncharacterized LOC118567764	NC_000067.7:86030338-86038963	estrogen related receptor%2C alpha	NC_000085.7:6888344-6899176	26379	Esrra	GO:0003700	DNA binding transcription factor activity
XR_004936217.1	XM_006526929.5	-0.741867	0.00574	uncharacterized LOC118567764	NC_000067.7:86030338-86038963	myelin regulatory factor%2C transcript variant X4	NC_000085.7:10185634-10218133	225908	Myrf	GO:0003700	DNA binding transcription factor activity
XR_004936217.1	XM_030250732.2	0.783011	0.002598	uncharacterized LOC118567764	NC_000067.7:86030338-86038963	conserved helix-loop-helix ubiquitous kinase%2C transcript variant X1	NC_000085.7:44064204-44095938	12675	Chuk	GO:0003700	DNA binding transcription factor activity
XR_004936217.1	NM_001381876.1	0.707001	0.010136	uncharacterized LOC118567764	NC_000067.7:86030338-86038963	E74-like factor 4 (ets domain transcription factor)%2C transcript variant 1	NC_000086.8:47499926-47543196	56501	Elf4	GO:0003700	DNA binding transcription factor activity
XR_004936217.1	NM_018789.2	0.801027	0.00174	uncharacterized LOC118567764	NC_000067.7:86030338-86038963	forkhead box O4	NC_000086.8:100298133-100304479	54601	Foxo4	GO:0003700	DNA binding transcription factor activity
XR_004936217.1	TCONS_00025632	0.718274	0.008508	uncharacterized LOC118567764	NC_000067.7:86030338-86038963	TCONS_00025632	NC_000086.8:139440276-139447588	14605	Tsc22d3	GO:0003700	DNA binding transcription factor activity
XR_004936217.1	TCONS_00025637	0.929817	1.2e-05	uncharacterized LOC118567764	NC_000067.7:86030338-86038963	TCONS_00025637	NC_000086.8:139474353-139499523	14605	Tsc22d3	GO:0003700	DNA binding transcription factor activity
XR_387243.5	NM_178661.4	0.823044	0.001007	predicted gene%2C 34331%2C transcript variant X2	NC_000067.7:89029976-89031775	cAMP responsive element binding protein 3-like 2	NC_000072.7:37307955-37419083	208647	Creb3l2	GO:0003700	DNA binding transcription factor activity
XR_387243.5	XM_006505743.4	0.865841	0.000272	predicted gene%2C 34331%2C transcript variant X2	NC_000067.7:89029976-89031775	peroxisome proliferator activated receptor gamma%2C transcript variant X6	NC_000072.7:115337839-115467365	19016	Pparg	GO:0003700	DNA binding transcription factor activity
XR_387243.5	XM_036153720.1	0.840191	0.000624	predicted gene%2C 34331%2C transcript variant X2	NC_000067.7:89029976-89031775	nuclear receptor subfamily 3%2C group C%2C member 2%2C transcript variant X5	NC_000074.7:77628806-77883052	110784	Nr3c2	GO:0003700	DNA binding transcription factor activity
XR_387243.5	NM_008688.3	-0.712291	0.009345	predicted gene%2C 34331%2C transcript variant X2	NC_000067.7:89029976-89031775	nuclear factor I/C%2C transcript variant 1	NC_000076.7:81232024-81263007	18029	Nfic	GO:0003700	DNA binding transcription factor activity
XR_387243.5	NM_001033333.3	-0.707724	0.010025	predicted gene%2C 34331%2C transcript variant X2	NC_000067.7:89029976-89031775	myelin regulatory factor-like	NC_000076.7:116612449-116732784	237558	Myrfl	GO:0003700	DNA binding transcription factor activity
XR_387243.5	NM_001313983.1	0.722619	0.007935	predicted gene%2C 34331%2C transcript variant X2	NC_000067.7:89029976-89031775	thyroid hormone receptor alpha%2C transcript variant 1	NC_000077.7:98632610-98659832	21833	Thra	GO:0003700	DNA binding transcription factor activity
XR_387243.5	NM_001176528.1	0.700303	0.011207	predicted gene%2C 34331%2C transcript variant X2	NC_000067.7:89029976-89031775	retinoic acid receptor%2C alpha%2C transcript variant 4	NC_000077.7:98851296-98865768	19401	Rara	GO:0003700	DNA binding transcription factor activity
XR_387243.5	NM_011488.3	-0.73647	0.006302	predicted gene%2C 34331%2C transcript variant X2	NC_000067.7:89029976-89031775	signal transducer and activator of transcription 5A%2C transcript variant 1	NC_000077.7:100750176-100775995	20850	Stat5a	GO:0003700	DNA binding transcription factor activity
XR_387243.5	XM_036157226.1	-0.705162	0.010422	predicted gene%2C 34331%2C transcript variant X2	NC_000067.7:89029976-89031775	nuclear receptor coactivator 1%2C transcript variant X12	NC_000078.7:4297425-4356564	17977	Ncoa1	GO:0000988	transcription factor activity, protein binding
XR_387243.5	NM_001042727.2	0.773038	0.003193	predicted gene%2C 34331%2C transcript variant X2	NC_000067.7:89029976-89031775	retinoic acid receptor%2C gamma%2C transcript variant 2	NC_000081.7:102143372-102154935	19411	Rarg	GO:0003700	DNA binding transcription factor activity
XR_387243.5	NM_028767.2	0.702897	0.010783	predicted gene%2C 34331%2C transcript variant X2	NC_000067.7:89029976-89031775	forkhead box P4%2C transcript variant 3	NC_000083.7:48178057-48235557	74123	Foxp4	GO:0003700	DNA binding transcription factor activity
XR_387243.5	NM_010258.3	0.777399	0.002921	predicted gene%2C 34331%2C transcript variant X2	NC_000067.7:89029976-89031775	GATA binding protein 6	NC_000084.7:11052509-11085635	14465	Gata6	GO:0003700	DNA binding transcription factor activity
XR_387243.5	NM_001164112.1	-0.711515	0.009458	predicted gene%2C 34331%2C transcript variant X2	NC_000067.7:89029976-89031775	nuclear factor of activated T cells%2C cytoplasmic%2C calcineurin dependent 1%2C transcript variant 5	NC_000084.7:80649419-80751388	18018	Nfatc1	GO:0003700	DNA binding transcription factor activity
XR_387243.5	NM_198429.2	0.732748	0.006714	predicted gene%2C 34331%2C transcript variant X2	NC_000067.7:89029976-89031775	nuclear factor of activated T cells%2C cytoplasmic%2C calcineurin dependent 1%2C transcript variant 2	NC_000084.7:80649419-80756286	18018	Nfatc1	GO:0003700	DNA binding transcription factor activity
XR_387243.5	XM_006527111.3	0.772056	0.003257	predicted gene%2C 34331%2C transcript variant X2	NC_000067.7:89029976-89031775	estrogen related receptor%2C alpha%2C transcript variant X1	NC_000085.7:6888344-6899416	26379	Esrra	GO:0003700	DNA binding transcription factor activity
XR_387243.5	XM_006541527.1	0.774793	0.003082	predicted gene%2C 34331%2C transcript variant X2	NC_000067.7:89029976-89031775	E74-like factor 4 (ets domain transcription factor)%2C transcript variant X1	NC_000086.8:47499925-47542680	56501	Elf4	GO:0003700	DNA binding transcription factor activity
XR_878372.3	XM_036157707.1	-0.706413	0.010227	predicted gene%2C 41915	NC_000067.7:89890241-89894241	activating transcription factor 2%2C transcript variant X8	NC_000068.8:73646861-73722908	11909	Atf2	GO:0003700	DNA binding transcription factor activity
XR_878372.3	XM_006499688.5	-0.815454	0.001225	predicted gene%2C 41915	NC_000067.7:89890241-89894241	MAX gene associated%2C transcript variant X1	NC_000068.8:119716771-119800610	29808	Mga	GO:0003700	DNA binding transcription factor activity
XR_878372.3	NM_013720.2	-0.764269	0.003799	predicted gene%2C 41915	NC_000067.7:89890241-89894241	MAX gene associated%2C transcript variant 1	NC_000068.8:119727708-119800062	29808	Mga	GO:0003700	DNA binding transcription factor activity
XR_878372.3	XM_036163288.1	-0.761759	0.003987	predicted gene%2C 41915	NC_000067.7:89890241-89894241	E74-like factor 2%2C transcript variant X2	NC_000069.7:51162705-51248079	69257	Elf2	GO:0003700	DNA binding transcription factor activity
XR_878372.3	XM_030253751.2	0.742843	0.005642	predicted gene%2C 41915	NC_000067.7:89890241-89894241	arginine glutamic acid dipeptide (RE) repeats%2C transcript variant X15	NC_000070.7:150561931-150706423	68703	Rere	GO:0003700	DNA binding transcription factor activity
XR_878372.3	NM_001359191.1	0.735059	0.006456	predicted gene%2C 41915	NC_000067.7:89890241-89894241	zinc finger with KRAB and SCAN domains 5%2C transcript variant 7	NC_000071.7:145141368-145158560	22757	Zkscan5	GO:0003700	DNA binding transcription factor activity
XR_878372.3	XM_006510962.5	0.707928	0.009994	predicted gene%2C 41915	NC_000067.7:89890241-89894241	transcription factor Dp 2%2C transcript variant X2	NC_000075.7:96078326-96205699	211586	Tfdp2	GO:0003700	DNA binding transcription factor activity
XR_878372.3	XM_030244940.1	0.76224	0.00395	predicted gene%2C 41915	NC_000067.7:89890241-89894241	nuclear factor I/C%2C transcript variant X2	NC_000076.7:81232024-81267753	18029	Nfic	GO:0003700	DNA binding transcription factor activity
XR_878372.3	XM_006533005.4	0.705784	0.010325	predicted gene%2C 41915	NC_000067.7:89890241-89894241	hepatic leukemia factor%2C transcript variant X2	NC_000077.7:90227360-90280656	217082	Hlf	GO:0003700	DNA binding transcription factor activity
XR_878372.3	XM_030248977.2	0.737057	0.006239	predicted gene%2C 41915	NC_000067.7:89890241-89894241	GA repeat binding protein%2C alpha%2C transcript variant X7	NC_000082.7:84631794-84660671	14390	Gabpa	GO:0003700	DNA binding transcription factor activity
XR_001779208.2	XM_006500482.5	0.705037	0.010442	uncharacterized LOC108167659	NC_000067.7:91931386-91940384	zinc finger SCAN domains 29%2C transcript variant X1	NC_000068.8:120988771-121001645	99334	Zscan29	GO:0003700	DNA binding transcription factor activity
XR_001779208.2	NM_001111026.2	-0.774061	0.003128	uncharacterized LOC108167659	NC_000067.7:91931386-91940384	RUNX1 translocation partner 1%2C transcript variant 2	NC_000070.7:13743301-13895056	12395	Runx1t1	GO:0003700	DNA binding transcription factor activity
XR_001779208.2	XM_036154184.1	-0.740809	0.005847	uncharacterized LOC108167659	NC_000067.7:91931386-91940384	nuclear factor of activated T cells 5%2C transcript variant X16	NC_000074.7:108020101-108106142	54446	Nfat5	GO:0003700	DNA binding transcription factor activity
XR_001779208.2	XM_006520609.4	-0.7495	0.00501	uncharacterized LOC108167659	NC_000067.7:91931386-91940384	POU domain%2C class 6%2C transcription factor 1%2C transcript variant X3	NC_000081.7:100473198-100497936	19009	Pou6f1	GO:0003700	DNA binding transcription factor activity
XR_001779208.2	XM_030248416.1	-0.718777	0.00844	uncharacterized LOC108167659	NC_000067.7:91931386-91940384	POU domain%2C class 6%2C transcription factor 1%2C transcript variant X2	NC_000081.7:100473198-100497936	19009	Pou6f1	GO:0003700	DNA binding transcription factor activity
XR_004936265.1	XM_030252467.2	0.786127	0.00243	uncharacterized LOC118567767	NC_000067.7:92268384-92271022	signal transducer and activator of transcription 1%2C transcript variant X2	NC_000067.7:52158635-52200082	20846	Stat1	GO:0003700	DNA binding transcription factor activity
XR_004936265.1	NM_010880.3	-0.880103	0.000159	uncharacterized LOC118567767	NC_000067.7:92268384-92271022	nucleolin	NC_000067.7:86272440-86287177	17975	Ncl	GO:0000988	transcription factor activity, protein binding
XR_004936265.1	NM_011137.3	-0.716906	0.008694	uncharacterized LOC118567767	NC_000067.7:92268384-92271022	POU domain%2C class 2%2C transcription factor 1%2C transcript variant 1	NC_000067.7:165692722-165830203	18986	Pou2f1	GO:0003700	DNA binding transcription factor activity
XR_004936265.1	XM_011238796.4	0.805412	0.001569	uncharacterized LOC118567767	NC_000067.7:92268384-92271022	activating transcription factor 6%2C transcript variant X2	NC_000067.7:170532244-170696154	226641	Atf6	GO:0003700	DNA binding transcription factor activity
XR_004936265.1	NM_023326.2	-0.797085	0.001906	uncharacterized LOC118567767	NC_000067.7:92268384-92271022	brain expressed myelocytomatosis oncogene	NC_000068.8:25596890-25597733	107771	Bmyc	GO:0003700	DNA binding transcription factor activity
XR_004936265.1	NM_007891.5	0.788165	0.002325	uncharacterized LOC118567767	NC_000067.7:92268384-92271022	E2F transcription factor 1%2C transcript variant 1	NC_000068.8:154401319-154411812	13555	E2f1	GO:0003700	DNA binding transcription factor activity
XR_004936265.1	NM_001359750.1	-0.703514	0.010684	uncharacterized LOC118567767	NC_000067.7:92268384-92271022	ets variant 3%2C transcript variant 4	NC_000069.7:87432884-87447465	27049	Etv3	GO:0003700	DNA binding transcription factor activity
XR_004936265.1	NM_011281.3	0.777031	0.002944	uncharacterized LOC118567767	NC_000067.7:92268384-92271022	RAR-related orphan receptor gamma%2C transcript variant 1	NC_000069.7:94280100-94305583	19885	Rorc	GO:0003700	DNA binding transcription factor activity
XR_004936265.1	NM_194060.1	0.892006	9.6e-05	uncharacterized LOC118567767	NC_000067.7:92268384-92271022	forkhead box O6	NC_000070.7:120124274-120144458	329934	Foxo6	GO:0003700	DNA binding transcription factor activity
XR_004936265.1	XM_030253745.2	-0.753949	0.004618	uncharacterized LOC118567767	NC_000067.7:92268384-92271022	arginine glutamic acid dipeptide (RE) repeats%2C transcript variant X7	NC_000070.7:150452812-150706423	68703	Rere	GO:0003700	DNA binding transcription factor activity
XR_004936265.1	NM_011537.3	-0.758022	0.00428	uncharacterized LOC118567767	NC_000067.7:92268384-92271022	T-box 5	NC_000071.7:119972727-120023283	21388	Tbx5	GO:0003700	DNA binding transcription factor activity
XR_004936265.1	NM_133906.4	0.737458	0.006196	uncharacterized LOC118567767	NC_000067.7:92268384-92271022	zinc finger with KRAB and SCAN domains 1%2C transcript variant 1	NC_000071.7:138083345-138106084	74570	Zkscan1	GO:0003700	DNA binding transcription factor activity
XR_004936265.1	NM_178661.4	-0.733015	0.006683	uncharacterized LOC118567767	NC_000067.7:92268384-92271022	cAMP responsive element binding protein 3-like 2	NC_000072.7:37307955-37419083	208647	Creb3l2	GO:0003700	DNA binding transcription factor activity
XR_004936265.1	XM_030255071.2	0.701678	0.010981	uncharacterized LOC118567767	NC_000067.7:92268384-92271022	forkhead box P1%2C transcript variant X36	NC_000072.7:98902302-99005269	108655	Foxp1	GO:0003700	DNA binding transcription factor activity
XR_004936265.1	NM_010155.3	-0.897602	7.4e-05	uncharacterized LOC118567767	NC_000067.7:92268384-92271022	Ets2 repressor factor	NC_000073.7:24941984-24950183	13875	Erf	GO:0003700	DNA binding transcription factor activity
XR_004936265.1	NM_009884.3	0.777828	0.002896	uncharacterized LOC118567767	NC_000067.7:92268384-92271022	CCAAT/enhancer binding protein (C/EBP)%2C gamma	NC_000073.7:34745846-34755991	12611	Cebpg	GO:0003700	DNA binding transcription factor activity
XR_004936265.1	NM_007678.3	0.837954	0.000666	uncharacterized LOC118567767	NC_000067.7:92268384-92271022	CCAAT/enhancer binding protein (C/EBP)%2C alpha%2C transcript variant 1	NC_000073.7:34818717-34821353	12606	Cebpa	GO:0003700	DNA binding transcription factor activity
XR_004936265.1	NM_030693.2	0.796228	0.001943	uncharacterized LOC118567767	NC_000067.7:92268384-92271022	activating transcription factor 5%2C transcript variant 1	NC_000073.7:44461679-44465082	107503	Atf5	GO:0003700	DNA binding transcription factor activity
XR_004936265.1	NM_016974.3	-0.719912	0.008288	uncharacterized LOC118567767	NC_000067.7:92268384-92271022	D site albumin promoter binding protein	NC_000073.7:45354670-45359627	13170	Dbp	GO:0003700	DNA binding transcription factor activity
XR_004936265.1	XM_006540597.2	-0.703357	0.010709	uncharacterized LOC118567767	NC_000067.7:92268384-92271022	D site albumin promoter binding protein%2C transcript variant X2	NC_000073.7:45356029-45359579	13170	Dbp	GO:0003700	DNA binding transcription factor activity
XR_004936265.1	XM_006541012.5	0.809552	0.001419	uncharacterized LOC118567767	NC_000067.7:92268384-92271022	sphingosine kinase 2%2C transcript variant X2	NC_000073.7:45359684-45364557	56632	Sphk2	GO:0003700	DNA binding transcription factor activity
XR_004936265.1	NM_001252601.1	0.829179	0.000853	uncharacterized LOC118567767	NC_000067.7:92268384-92271022	interferon regulatory factor 7%2C transcript variant 3	NC_000073.7:140843095-140846337	54123	Irf7	GO:0003700	DNA binding transcription factor activity
XR_004936265.1	NM_016850.3	0.741258	0.005801	uncharacterized LOC118567767	NC_000067.7:92268384-92271022	interferon regulatory factor 7%2C transcript variant 1	NC_000073.7:140843095-140846337	54123	Irf7	GO:0003700	DNA binding transcription factor activity
XR_004936265.1	NM_001256042.1	-0.779922	0.002772	uncharacterized LOC118567767	NC_000067.7:92268384-92271022	heat shock transcription factor 4%2C transcript variant 1	NC_000074.7:105996432-106002477	26386	Hsf4	GO:0003700	DNA binding transcription factor activity
XR_004936265.1	XM_006531039.3	0.716165	0.008796	uncharacterized LOC118567767	NC_000067.7:92268384-92271022	heat shock transcription factor 4%2C transcript variant X3	NC_000074.7:105996560-106002473	26386	Hsf4	GO:0003700	DNA binding transcription factor activity
XR_004936265.1	TCONS_00013920	0.843519	0.000565	uncharacterized LOC118567767	NC_000067.7:92268384-92271022	TCONS_00013920	NC_000075.7:122677987-122694972	235682	Zfp445	GO:0003700	DNA binding transcription factor activity
XR_004936265.1	TCONS_00013922	0.83575	0.00071	uncharacterized LOC118567767	NC_000067.7:92268384-92271022	TCONS_00013922	NC_000075.7:122677987-122695059	235682	Zfp445	GO:0003700	DNA binding transcription factor activity
XR_004936265.1	XM_030244871.2	-0.761646	0.003996	uncharacterized LOC118567767	NC_000067.7:92268384-92271022	ELK3%2C member of ETS oncogene family%2C transcript variant X1	NC_000076.7:93083276-93146402	13713	Elk3	GO:0003700	DNA binding transcription factor activity
XR_004936265.1	NM_019963.2	0.758734	0.004223	uncharacterized LOC118567767	NC_000067.7:92268384-92271022	signal transducer and activator of transcription 2	NC_000076.7:128106366-128128722	20847	Stat2	GO:0003700	DNA binding transcription factor activity
XR_004936265.1	XM_030245860.2	-0.732151	0.006781	uncharacterized LOC118567767	NC_000067.7:92268384-92271022	K(lysine) acetyltransferase 7%2C transcript variant X6	NC_000077.7:95165084-95201085	217127	Kat7	GO:0003700	DNA binding transcription factor activity
XR_004936265.1	NM_145434.4	-0.885765	0.000126	uncharacterized LOC118567767	NC_000067.7:92268384-92271022	nuclear receptor subfamily 1%2C group D%2C member 1	NC_000077.7:98658757-98666203	217166	Nr1d1	GO:0003700	DNA binding transcription factor activity
XR_004936265.1	NM_009024.2	-0.722634	0.007933	uncharacterized LOC118567767	NC_000067.7:92268384-92271022	retinoic acid receptor%2C alpha%2C transcript variant 1	NC_000077.7:98828521-98865768	19401	Rara	GO:0003700	DNA binding transcription factor activity
XR_004936265.1	NM_001113563.2	0.825207	0.000951	uncharacterized LOC118567767	NC_000067.7:92268384-92271022	signal transducer and activator of transcription 5B%2C transcript variant 2	NC_000077.7:100671556-100741407	20851	Stat5b	GO:0003700	DNA binding transcription factor activity
XR_004936265.1	NM_011488.3	0.839878	0.000629	uncharacterized LOC118567767	NC_000067.7:92268384-92271022	signal transducer and activator of transcription 5A%2C transcript variant 1	NC_000077.7:100750176-100775995	20850	Stat5a	GO:0003700	DNA binding transcription factor activity
XR_004936265.1	NM_033270.2	0.723523	0.00782	uncharacterized LOC118567767	NC_000067.7:92268384-92271022	E2F transcription factor 6%2C transcript variant 1	NC_000078.7:16860965-16876753	50496	E2f6	GO:0003700	DNA binding transcription factor activity
XR_004936265.1	XM_017315205.2	0.799568	0.0018	uncharacterized LOC118567767	NC_000067.7:92268384-92271022	forkhead box N3%2C transcript variant X11	NC_000078.7:99156339-99359248	71375	Foxn3	GO:0003700	DNA binding transcription factor activity
XR_004936265.1	NM_017373.3	0.782695	0.002615	uncharacterized LOC118567767	NC_000067.7:92268384-92271022	nuclear factor%2C interleukin 3%2C regulated	NC_000079.7:53121244-53135075	18030	Nfil3	GO:0003700	DNA binding transcription factor activity
XR_004936265.1	NM_001122963.2	0.767349	0.003577	uncharacterized LOC118567767	NC_000067.7:92268384-92271022	GC-rich promoter binding protein 1%2C transcript variant 1	NC_000079.7:111562213-111626661	73274	Gpbp1	GO:0003700	DNA binding transcription factor activity
XR_004936265.1	XM_036158539.1	0.858624	0.000349	uncharacterized LOC118567767	NC_000067.7:92268384-92271022	thyroid hormone receptor beta%2C transcript variant X19	NC_000080.7:4429598-4810538	21834	Thrb	GO:0003700	DNA binding transcription factor activity
XR_004936265.1	NM_011243.2	0.745784	0.005356	uncharacterized LOC118567767	NC_000067.7:92268384-92271022	retinoic acid receptor%2C beta%2C transcript variant beta2	NC_000080.7:5894286-6038924	218772	Rarb	GO:0003700	DNA binding transcription factor activity
XR_004936265.1	NM_001159417.1	0.826421	0.00092	uncharacterized LOC118567767	NC_000067.7:92268384-92271022	interferon regulatory factor 9%2C transcript variant 1	NC_000080.7:55841441-55847487	16391	Irf9	GO:0003700	DNA binding transcription factor activity
XR_004936265.1	NM_001357926.1	0.77829	0.002868	uncharacterized LOC118567767	NC_000067.7:92268384-92271022	metadherin%2C transcript variant 1	NC_000081.7:34082864-34143683	67154	Mtdh	GO:0003700	DNA binding transcription factor activity
XR_004936265.1	XM_030248421.2	0.797578	0.001884	uncharacterized LOC118567767	NC_000067.7:92268384-92271022	peroxisome proliferator activated receptor alpha%2C transcript variant X9	NC_000081.7:85619621-85691052	19013	Ppara	GO:0003700	DNA binding transcription factor activity
XR_004936265.1	NM_008065.2	-0.867838	0.000253	uncharacterized LOC118567767	NC_000067.7:92268384-92271022	GA repeat binding protein%2C alpha	NC_000082.7:84632011-84660667	14390	Gabpa	GO:0003700	DNA binding transcription factor activity
XR_004936265.1	NM_011145.3	0.8373	0.000679	uncharacterized LOC118567767	NC_000067.7:92268384-92271022	peroxisome proliferator activator receptor delta	NC_000083.7:28451727-28520443	19015	Ppard	GO:0003700	DNA binding transcription factor activity
XR_004936265.1	NM_017406.4	0.713538	0.009166	uncharacterized LOC118567767	NC_000067.7:92268384-92271022	activating transcription factor 6 beta	NC_000083.7:34866119-34874048	12915	Atf6b	GO:0003700	DNA binding transcription factor activity
XR_004936265.1	NM_028767.2	-0.733912	0.006583	uncharacterized LOC118567767	NC_000067.7:92268384-92271022	forkhead box P4%2C transcript variant 3	NC_000083.7:48178057-48235557	74123	Foxp4	GO:0003700	DNA binding transcription factor activity
XR_004936265.1	XM_030249554.2	0.722724	0.007922	uncharacterized LOC118567767	NC_000067.7:92268384-92271022	nuclear transcription factor-Y alpha%2C transcript variant X7	NC_000083.7:48693912-48716815	18044	Nfya	GO:0003700	DNA binding transcription factor activity
XR_004936265.1	NM_010913.2	0.780601	0.002733	uncharacterized LOC118567767	NC_000067.7:92268384-92271022	nuclear transcription factor-Y alpha%2C transcript variant 2	NC_000083.7:48693912-48716848	18044	Nfya	GO:0003700	DNA binding transcription factor activity
XR_004936265.1	NM_010258.3	-0.726815	0.007411	uncharacterized LOC118567767	NC_000067.7:92268384-92271022	GATA binding protein 6	NC_000084.7:11052509-11085635	14465	Gata6	GO:0003700	DNA binding transcription factor activity
XR_004936265.1	NM_027007.2	-0.707309	0.010088	uncharacterized LOC118567767	NC_000067.7:92268384-92271022	zinc finger protein 397	NC_000084.7:24087744-24097728	69256	Zfp397	GO:0003700	DNA binding transcription factor activity
XR_004936265.1	NM_007953.2	0.713341	0.009194	uncharacterized LOC118567767	NC_000067.7:92268384-92271022	estrogen related receptor%2C alpha	NC_000085.7:6888344-6899176	26379	Esrra	GO:0003700	DNA binding transcription factor activity
XR_004936265.1	NM_007922.5	-0.70054	0.011168	uncharacterized LOC118567767	NC_000067.7:92268384-92271022	ELK1%2C member of ETS oncogene family	NC_000086.8:20799633-20816847	13712	Elk1	GO:0003700	DNA binding transcription factor activity
XR_004936265.1	XM_036162179.1	0.78605	0.002434	uncharacterized LOC118567767	NC_000067.7:92268384-92271022	activating transcription factor 1%2C pseudogene	NC_000086.8:52885449-52886480	100040260	Atf1-ps	GO:0003700	DNA binding transcription factor activity
XR_004936265.1	XM_006528139.3	-0.709475	0.00976	uncharacterized LOC118567767	NC_000067.7:92268384-92271022	forkhead box O4%2C transcript variant X1	NC_000086.8:100297854-100301320	54601	Foxo4	GO:0003700	DNA binding transcription factor activity
XR_387272.1	NM_013839.4	0.721299	0.008106	predicted gene%2C 35992%2C transcript variant X1	NC_000067.7:92307278-92321342	nuclear receptor subfamily 1%2C group H%2C member 3%2C transcript variant 1	NC_000068.8:91014405-91025380	22259	Nr1h3	GO:0003700	DNA binding transcription factor activity
XR_387272.1	TCONS_00003818	0.79709	0.001905	predicted gene%2C 35992%2C transcript variant X1	NC_000067.7:92307278-92321342	TCONS_00003818	NC_000069.7:52175784-52197683	56458	Foxo1	GO:0003700	DNA binding transcription factor activity
XR_387272.1	XM_030253749.2	-0.701871	0.010949	predicted gene%2C 35992%2C transcript variant X1	NC_000067.7:92307278-92321342	arginine glutamic acid dipeptide (RE) repeats%2C transcript variant X11	NC_000070.7:150365371-150706423	68703	Rere	GO:0003700	DNA binding transcription factor activity
XR_387272.1	TCONS_00007037	0.753076	0.004693	predicted gene%2C 35992%2C transcript variant X1	NC_000067.7:92307278-92321342	TCONS_00007037	NC_000071.7:119812586-119822330	21386	Tbx3	GO:0003700	DNA binding transcription factor activity
XR_387272.1	TCONS_00010634	0.727255	0.007357	predicted gene%2C 35992%2C transcript variant X1	NC_000067.7:92307278-92321342	TCONS_00010634	NC_000073.7:45354455-45364631	56632	Sphk2	GO:0003700	DNA binding transcription factor activity
XR_387272.1	NM_010906.4	0.808767	0.001447	predicted gene%2C 35992%2C transcript variant X1	NC_000067.7:92307278-92321342	nuclear factor I/X%2C transcript variant 2	NC_000074.7:85431340-85526997	18032	Nfix	GO:0003700	DNA binding transcription factor activity
XR_387272.1	TCONS_00012277	0.79368	0.002058	predicted gene%2C 35992%2C transcript variant X1	NC_000067.7:92307278-92321342	TCONS_00012277	NC_000074.7:85435477-85526325	18032	Nfix	GO:0003700	DNA binding transcription factor activity
XR_387272.1	XM_036157843.1	0.843184	0.00057	predicted gene%2C 35992%2C transcript variant X1	NC_000067.7:92307278-92321342	E2F transcription factor 3%2C transcript variant X4	NC_000079.7:30090557-30131040	13557	E2f3	GO:0003700	DNA binding transcription factor activity
XR_387272.1	TCONS_00022804	0.845771	0.000527	predicted gene%2C 35992%2C transcript variant X1	NC_000067.7:92307278-92321342	TCONS_00022804	NC_000083.7:28547546-28569776	21678	Tead3	GO:0003700	DNA binding transcription factor activity
XR_387272.1	XM_030250313.2	0.753974	0.004616	predicted gene%2C 35992%2C transcript variant X1	NC_000067.7:92307278-92321342	cAMP responsive element modulator%2C transcript variant X44	NC_000084.7:3263180-3281621	12916	Crem	GO:0003700	DNA binding transcription factor activity
XR_387272.1	XM_030250933.2	0.787578	0.002355	predicted gene%2C 35992%2C transcript variant X1	NC_000067.7:92307278-92321342	metastasis-associated gene family%2C member 2%2C transcript variant X2	NC_000085.7:8919704-8929663	23942	Mta2	GO:0003700	DNA binding transcription factor activity
TCONS_00000353	NM_177758.4	-0.82939	0.000848	TCONS_00000353	NC_000067.7:92307382-92312761	zinc finger and SCAN domains 20	NC_000070.7:128477331-128503891	269585	Zscan20	GO:0003700	DNA binding transcription factor activity
TCONS_00000353	NM_001282967.1	0.72587	0.007527	TCONS_00000353	NC_000067.7:92307382-92312761	ELK3%2C member of ETS oncogene family%2C transcript variant 4	NC_000076.7:93083277-93147021	13713	Elk3	GO:0003700	DNA binding transcription factor activity
TCONS_00000353	XM_006517971.5	0.700973	0.011096	TCONS_00000353	NC_000067.7:92307382-92312761	thyroid hormone receptor beta%2C transcript variant X14	NC_000080.7:4429598-4551410	21834	Thrb	GO:0003700	DNA binding transcription factor activity
TCONS_00000353	NM_001113417.1	0.707274	0.010094	TCONS_00000353	NC_000067.7:92307382-92312761	thyroid hormone receptor beta%2C transcript variant 1	NC_000080.7:4431607-4808736	21834	Thrb	GO:0003700	DNA binding transcription factor activity
TCONS_00000353	XM_006523795.3	-0.709732	0.009722	TCONS_00000353	NC_000067.7:92307382-92312761	nuclear transcription factor-Y alpha%2C transcript variant X6	NC_000083.7:48693912-48716773	18044	Nfya	GO:0003700	DNA binding transcription factor activity
NR_138577.1	XM_030252077.2	0.812006	0.001336	RIKEN cDNA 5033417F24 gene%2C transcript variant 1	NC_000067.7:92836099-92838411	nuclear receptor coactivator 2%2C transcript variant X11	NC_000067.7:13212641-13364673	17978	Ncoa2	GO:0000988	transcription factor activity, protein binding
NR_138577.1	NM_009952.2	0.715335	0.008912	RIKEN cDNA 5033417F24 gene%2C transcript variant 1	NC_000067.7:92836099-92838411	cAMP responsive element binding protein 1%2C transcript variant B	NC_000067.7:64571962-64643707	12912	Creb1	GO:0003700	DNA binding transcription factor activity
NR_138577.1	NM_001159731.1	0.876956	0.00018	RIKEN cDNA 5033417F24 gene%2C transcript variant 1	NC_000067.7:92836099-92838411	retinoid X receptor gamma%2C transcript variant 2	NC_000067.7:167445833-167467192	20183	Rxrg	GO:0003700	DNA binding transcription factor activity
NR_138577.1	NM_183355.3	0.746251	0.005311	RIKEN cDNA 5033417F24 gene%2C transcript variant 1	NC_000067.7:92836099-92838411	pre B cell leukemia homeobox 1%2C transcript variant a	NC_000067.7:167981095-168259738	18514	Pbx1	GO:0003700	DNA binding transcription factor activity
NR_138577.1	NM_011305.3	0.762979	0.003895	RIKEN cDNA 5033417F24 gene%2C transcript variant 1	NC_000067.7:92836099-92838411	retinoid X receptor alpha%2C transcript variant 1	NC_000068.8:27567212-27653331	20181	Rxra	GO:0003700	DNA binding transcription factor activity
NR_138577.1	NM_178778.3	0.714285	0.00906	RIKEN cDNA 5033417F24 gene%2C transcript variant 1	NC_000067.7:92836099-92838411	suppressor of cancer cell invasion	NC_000068.8:38956225-39080742	320271	Scai	GO:0000988	transcription factor activity, protein binding
NR_138577.1	NM_001284371.1	0.739817	0.005949	RIKEN cDNA 5033417F24 gene%2C transcript variant 1	NC_000067.7:92836099-92838411	activating transcription factor 2%2C transcript variant 6	NC_000068.8:73656690-73722983	11909	Atf2	GO:0003700	DNA binding transcription factor activity
NR_138577.1	XM_036157713.1	0.745208	0.005411	RIKEN cDNA 5033417F24 gene%2C transcript variant 1	NC_000067.7:92836099-92838411	activating transcription factor 2%2C transcript variant X23	NC_000068.8:73660896-73722972	11909	Atf2	GO:0003700	DNA binding transcription factor activity
NR_138577.1	NM_012051.4	0.741046	0.005823	RIKEN cDNA 5033417F24 gene%2C transcript variant 1	NC_000067.7:92836099-92838411	ets variant 3%2C transcript variant 3	NC_000069.7:87432884-87447465	27049	Etv3	GO:0003700	DNA binding transcription factor activity
NR_138577.1	NM_023214.7	0.814961	0.001241	RIKEN cDNA 5033417F24 gene%2C transcript variant 1	NC_000067.7:92836099-92838411	solute carrier family 30 (zinc transporter)%2C member 7	NC_000069.7:115732621-115801055	66500	Slc30a7	GO:0003700	DNA binding transcription factor activity
NR_138577.1	XM_036163227.1	0.873397	0.000206	RIKEN cDNA 5033417F24 gene%2C transcript variant 1	NC_000067.7:92836099-92838411	solute carrier family 30 (zinc transporter)%2C member 7%2C transcript variant X1	NC_000069.7:115765490-115801079	66500	Slc30a7	GO:0003700	DNA binding transcription factor activity
NR_138577.1	NM_008689.2	0.720632	0.008193	RIKEN cDNA 5033417F24 gene%2C transcript variant 1	NC_000067.7:92836099-92838411	nuclear factor of kappa light polypeptide gene enhancer in B cells 1%2C p105	NC_000069.7:135290415-135397308	18033	Nfkb1	GO:0003700	DNA binding transcription factor activity
NR_138577.1	NM_013497.4	0.83705	0.000684	RIKEN cDNA 5033417F24 gene%2C transcript variant 1	NC_000067.7:92836099-92838411	cAMP responsive element binding protein 3	NC_000070.7:43562657-43567061	12913	Creb3	GO:0003700	DNA binding transcription factor activity
NR_138577.1	NM_008687.6	0.776699	0.002964	RIKEN cDNA 5033417F24 gene%2C transcript variant 1	NC_000067.7:92836099-92838411	nuclear factor I/B%2C transcript variant 3	NC_000070.7:82208409-82424016	18028	Nfib	GO:0003700	DNA binding transcription factor activity
NR_138577.1	NM_001290696.1	0.849331	0.000472	RIKEN cDNA 5033417F24 gene%2C transcript variant 1	NC_000067.7:92836099-92838411	forkhead box J3%2C transcript variant 2	NC_000070.7:119396857-119486316	230700	Foxj3	GO:0003700	DNA binding transcription factor activity
NR_138577.1	NM_172728.2	-0.728061	0.00726	RIKEN cDNA 5033417F24 gene%2C transcript variant 1	NC_000067.7:92836099-92838411	cAMP responsive element binding protein 5%2C transcript variant 2	NC_000072.7:53550358-53672817	231991	Creb5	GO:0003700	DNA binding transcription factor activity
NR_138577.1	TCONS_00009475	0.724766	0.007664	RIKEN cDNA 5033417F24 gene%2C transcript variant 1	NC_000067.7:92836099-92838411	TCONS_00009475	NC_000073.7:12531329-12532991	232875	Zscan18	GO:0003700	DNA binding transcription factor activity
NR_138577.1	TCONS_00009896	0.799354	0.001809	RIKEN cDNA 5033417F24 gene%2C transcript variant 1	NC_000067.7:92836099-92838411	TCONS_00009896	NC_000073.7:90091988-90097251	233490	Crebzf	GO:0003700	DNA binding transcription factor activity
NR_138577.1	NM_001166585.2	0.73067	0.006952	RIKEN cDNA 5033417F24 gene%2C transcript variant 1	NC_000067.7:92836099-92838411	TEA domain family member 1%2C transcript variant 3	NC_000073.7:112278562-112505991	21676	Tead1	GO:0003700	DNA binding transcription factor activity
NR_138577.1	XM_011242265.3	0.8234	0.000997	RIKEN cDNA 5033417F24 gene%2C transcript variant 1	NC_000067.7:92836099-92838411	nuclear receptor subfamily 2%2C group F%2C member 6%2C transcript variant X4	NC_000074.7:71826761-71831012	13864	Nr2f6	GO:0003700	DNA binding transcription factor activity
NR_138577.1	NM_010150.2	0.723296	0.007849	RIKEN cDNA 5033417F24 gene%2C transcript variant 1	NC_000067.7:92836099-92838411	nuclear receptor subfamily 2%2C group F%2C member 6	NC_000074.7:71826762-71834596	13864	Nr2f6	GO:0003700	DNA binding transcription factor activity
NR_138577.1	XM_036153804.1	-0.750143	0.004952	RIKEN cDNA 5033417F24 gene%2C transcript variant 1	NC_000067.7:92836099-92838411	nuclear factor I/X%2C transcript variant X20	NC_000074.7:85431345-85527086	18032	Nfix	GO:0003700	DNA binding transcription factor activity
NR_138577.1	NM_001033161.2	0.780378	0.002746	RIKEN cDNA 5033417F24 gene%2C transcript variant 1	NC_000067.7:92836099-92838411	TNFRSF1A-associated via death domain	NC_000074.7:105985206-105991226	71609	Tradd	GO:0003700	DNA binding transcription factor activity
NR_138577.1	NM_010901.3	0.735987	0.006354	RIKEN cDNA 5033417F24 gene%2C transcript variant 1	NC_000067.7:92836099-92838411	nuclear factor of activated T cells%2C cytoplasmic%2C calcineurin dependent 3%2C transcript variant 1	NC_000074.7:106786221-106857169	18021	Nfatc3	GO:0003700	DNA binding transcription factor activity
NR_138577.1	TCONS_00011736	0.706105	0.010275	RIKEN cDNA 5033417F24 gene%2C transcript variant 1	NC_000067.7:92836099-92838411	TCONS_00011736	NC_000074.7:108020101-108106142	54446	Nfat5	GO:0003700	DNA binding transcription factor activity
NR_138577.1	NM_020496.3	0.702445	0.010856	RIKEN cDNA 5033417F24 gene%2C transcript variant 1	NC_000067.7:92836099-92838411	T-box 20%2C transcript variant 2	NC_000075.7:24651543-24685599	57246	Tbx20	GO:0003700	DNA binding transcription factor activity
NR_138577.1	NM_001372534.1	0.715129	0.008941	RIKEN cDNA 5033417F24 gene%2C transcript variant 1	NC_000067.7:92836099-92838411	E26 avian leukemia oncogene 1%2C 5' domain%2C transcript variant 3	NC_000075.7:32547536-32669116	23871	Ets1	GO:0003700	DNA binding transcription factor activity
NR_138577.1	NM_007840.3	0.784223	0.002531	RIKEN cDNA 5033417F24 gene%2C transcript variant 1	NC_000067.7:92836099-92838411	DEAD box helicase 5	NC_000077.7:106671181-106679320	13207	Ddx5	GO:0000988	transcription factor activity, protein binding
NR_138577.1	TCONS_00017083	0.782487	0.002627	RIKEN cDNA 5033417F24 gene%2C transcript variant 1	NC_000067.7:92836099-92838411	TCONS_00017083	NC_000077.7:106673520-106679733	13207	Ddx5	GO:0000988	transcription factor activity, protein binding
NR_138577.1	XM_030247246.2	0.752258	0.004764	RIKEN cDNA 5033417F24 gene%2C transcript variant 1	NC_000067.7:92836099-92838411	zinc finger and SCAN domain containing 12%2C transcript variant X1	NC_000079.7:21546981-21556458	22758	Zscan12	GO:0003700	DNA binding transcription factor activity
NR_138577.1	NM_029315.1	0.73448	0.00652	RIKEN cDNA 5033417F24 gene%2C transcript variant 1	NC_000067.7:92836099-92838411	POU domain class 5%2C transcription factor 2	NC_000079.7:78173020-78174415	75507	Pou5f2	GO:0003700	DNA binding transcription factor activity
NR_138577.1	NM_010151.3	0.708334	0.009932	RIKEN cDNA 5033417F24 gene%2C transcript variant 1	NC_000067.7:92836099-92838411	nuclear receptor subfamily 2%2C group F%2C member 1%2C transcript variant 1	NC_000079.7:78337091-78346992	13865	Nr2f1	GO:0003700	DNA binding transcription factor activity
NR_138577.1	TCONS_00019973	0.763356	0.003866	RIKEN cDNA 5033417F24 gene%2C transcript variant 1	NC_000067.7:92836099-92838411	TCONS_00019973	NC_000080.7:63436369-63506854	14463	Gata4	GO:0003700	DNA binding transcription factor activity
NR_138577.1	XM_011244957.3	-0.706395	0.01023	RIKEN cDNA 5033417F24 gene%2C transcript variant 1	NC_000067.7:92836099-92838411	GATA binding protein 4%2C transcript variant X2	NC_000080.7:63436369-63508582	14463	Gata4	GO:0003700	DNA binding transcription factor activity
NR_138577.1	NM_007920.4	0.717794	0.008573	RIKEN cDNA 5033417F24 gene%2C transcript variant 1	NC_000067.7:92836099-92838411	E74-like factor 1%2C transcript variant 1	NC_000080.7:79718633-79819931	13709	Elf1	GO:0003700	DNA binding transcription factor activity
NR_138577.1	TCONS_00020648	-0.737957	0.006143	RIKEN cDNA 5033417F24 gene%2C transcript variant 1	NC_000067.7:92836099-92838411	TCONS_00020648	NC_000081.7:11984074-11996093	20024	Sub1	GO:0000988	transcription factor activity, protein binding
NR_138577.1	XM_006520152.3	0.705586	0.010356	RIKEN cDNA 5033417F24 gene%2C transcript variant 1	NC_000067.7:92836099-92838411	metadherin%2C transcript variant X7	NC_000081.7:34082612-34143683	67154	Mtdh	GO:0003700	DNA binding transcription factor activity
NR_138577.1	TCONS_00021107	0.715388	0.008904	RIKEN cDNA 5033417F24 gene%2C transcript variant 1	NC_000067.7:92836099-92838411	TCONS_00021107	NC_000081.7:100472952-100498314	19009	Pou6f1	GO:0003700	DNA binding transcription factor activity
NR_138577.1	NM_148924.3	0.71177	0.009421	RIKEN cDNA 5033417F24 gene%2C transcript variant 1	NC_000067.7:92836099-92838411	zinc finger protein 263	NC_000082.7:3561962-3568652	74120	Zfp263	GO:0003700	DNA binding transcription factor activity
NR_138577.1	NM_001081217.1	0.728961	0.007153	RIKEN cDNA 5033417F24 gene%2C transcript variant 1	NC_000067.7:92836099-92838411	zinc finger protein 174	NC_000082.7:3665086-3676744	385674	Zfp174	GO:0003700	DNA binding transcription factor activity
NR_138577.1	NM_001033496.3	0.716161	0.008797	RIKEN cDNA 5033417F24 gene%2C transcript variant 1	NC_000067.7:92836099-92838411	zinc finger protein 213	NC_000083.7:23775740-23783200	449521	Zfp213	GO:0003700	DNA binding transcription factor activity
NR_138577.1	NM_011306.4	-0.7199	0.00829	RIKEN cDNA 5033417F24 gene%2C transcript variant 1	NC_000067.7:92836099-92838411	retinoid X receptor beta%2C transcript variant 2	NC_000083.7:34250785-34257377	20182	Rxrb	GO:0003700	DNA binding transcription factor activity
NR_138577.1	NM_017463.3	0.710975	0.009538	RIKEN cDNA 5033417F24 gene%2C transcript variant 1	NC_000067.7:92836099-92838411	pre B cell leukemia homeobox 2	NC_000083.7:34811232-34816374	18515	Pbx2	GO:0003700	DNA binding transcription factor activity
XR_878410.2	XM_030252077.2	0.918548	2.5e-05	predicted gene%2C 41920	NC_000067.7:93467526-93482407	nuclear receptor coactivator 2%2C transcript variant X11	NC_000067.7:13212641-13364673	17978	Ncoa2	GO:0000988	transcription factor activity, protein binding
XR_878410.2	NM_001205314.1	0.706532	0.010208	predicted gene%2C 41920	NC_000067.7:93467526-93482407	signal transducer and activator of transcription 1%2C transcript variant 3	NC_000067.7:52158596-52201024	20846	Stat1	GO:0003700	DNA binding transcription factor activity
XR_878410.2	NM_001357627.1	0.783295	0.002582	predicted gene%2C 41920	NC_000067.7:93467526-93482407	signal transducer and activator of transcription 1%2C transcript variant 4	NC_000067.7:52158596-52201024	20846	Stat1	GO:0003700	DNA binding transcription factor activity
XR_878410.2	NM_001159731.1	0.9028	5.8e-05	predicted gene%2C 41920	NC_000067.7:93467526-93482407	retinoid X receptor gamma%2C transcript variant 2	NC_000067.7:167445833-167467192	20183	Rxrg	GO:0003700	DNA binding transcription factor activity
XR_878410.2	TCONS_00001431	0.714352	0.00905	predicted gene%2C 41920	NC_000067.7:93467526-93482407	TCONS_00001431	NC_000067.7:167947715-168259738	18514	Pbx1	GO:0003700	DNA binding transcription factor activity
XR_878410.2	NM_183355.3	0.791838	0.002144	predicted gene%2C 41920	NC_000067.7:93467526-93482407	pre B cell leukemia homeobox 1%2C transcript variant a	NC_000067.7:167981095-168259738	18514	Pbx1	GO:0003700	DNA binding transcription factor activity
XR_878410.2	NM_001081304.1	0.703947	0.010614	predicted gene%2C 41920	NC_000067.7:93467526-93482407	activating transcription factor 6	NC_000067.7:170532025-170695340	226641	Atf6	GO:0003700	DNA binding transcription factor activity
XR_878410.2	NM_011305.3	0.789349	0.002266	predicted gene%2C 41920	NC_000067.7:93467526-93482407	retinoid X receptor alpha%2C transcript variant 1	NC_000068.8:27567212-27653331	20181	Rxra	GO:0003700	DNA binding transcription factor activity
XR_878410.2	NM_178778.3	0.859305	0.000341	predicted gene%2C 41920	NC_000067.7:93467526-93482407	suppressor of cancer cell invasion	NC_000068.8:38956225-39080742	320271	Scai	GO:0000988	transcription factor activity, protein binding
XR_878410.2	XM_036157713.1	0.894957	8.4e-05	predicted gene%2C 41920	NC_000067.7:93467526-93482407	activating transcription factor 2%2C transcript variant X23	NC_000068.8:73660896-73722972	11909	Atf2	GO:0003700	DNA binding transcription factor activity
XR_878410.2	XM_006499689.3	0.769179	0.00345	predicted gene%2C 41920	NC_000067.7:93467526-93482407	MAX gene associated%2C transcript variant X3	NC_000068.8:119702993-119800610	29808	Mga	GO:0003700	DNA binding transcription factor activity
XR_878410.2	NM_020255.3	-0.886745	0.000121	predicted gene%2C 41920	NC_000067.7:93467526-93482407	SCAN domain-containing 1	NC_000068.8:156153765-156154624	19018	Scand1	GO:0003700	DNA binding transcription factor activity
XR_878410.2	NM_007892.2	0.760034	0.00412	predicted gene%2C 41920	NC_000067.7:93467526-93482407	E2F transcription factor 5	NC_000069.7:14643730-14671369	13559	E2f5	GO:0003700	DNA binding transcription factor activity
XR_878410.2	TCONS_00003816	0.812568	0.001317	predicted gene%2C 41920	NC_000067.7:93467526-93482407	TCONS_00003816	NC_000069.7:52175757-52235699	56458	Foxo1	GO:0003700	DNA binding transcription factor activity
XR_878410.2	NM_019739.3	0.798294	0.001853	predicted gene%2C 41920	NC_000067.7:93467526-93482407	forkhead box O1	NC_000069.7:52175757-52257530	56458	Foxo1	GO:0003700	DNA binding transcription factor activity
XR_878410.2	NM_019995.4	-0.809424	0.001424	predicted gene%2C 41920	NC_000067.7:93467526-93482407	SPT20 SAGA complex component%2C transcript variant 3	NC_000069.7:54600525-54624321	56790	Supt20	GO:0000988	transcription factor activity, protein binding
XR_878410.2	NM_023214.7	0.976337	0	predicted gene%2C 41920	NC_000067.7:93467526-93482407	solute carrier family 30 (zinc transporter)%2C member 7	NC_000069.7:115732621-115801055	66500	Slc30a7	GO:0003700	DNA binding transcription factor activity
XR_878410.2	XM_036163227.1	0.864836	0.000282	predicted gene%2C 41920	NC_000067.7:93467526-93482407	solute carrier family 30 (zinc transporter)%2C member 7%2C transcript variant X1	NC_000069.7:115765490-115801079	66500	Slc30a7	GO:0003700	DNA binding transcription factor activity
XR_878410.2	NM_008689.2	0.85118	0.000445	predicted gene%2C 41920	NC_000067.7:93467526-93482407	nuclear factor of kappa light polypeptide gene enhancer in B cells 1%2C p105	NC_000069.7:135290415-135397308	18033	Nfkb1	GO:0003700	DNA binding transcription factor activity
XR_878410.2	XM_030253119.2	0.751314	0.004847	predicted gene%2C 41920	NC_000067.7:93467526-93482407	RUNX1 translocation partner 1%2C transcript variant X7	NC_000070.7:13797031-13895056	12395	Runx1t1	GO:0003700	DNA binding transcription factor activity
XR_878410.2	NM_013497.4	0.941516	5e-06	predicted gene%2C 41920	NC_000067.7:93467526-93482407	cAMP responsive element binding protein 3	NC_000070.7:43562657-43567061	12913	Creb3	GO:0003700	DNA binding transcription factor activity
XR_878410.2	NM_008687.6	0.852472	0.000427	predicted gene%2C 41920	NC_000067.7:93467526-93482407	nuclear factor I/B%2C transcript variant 3	NC_000070.7:82208409-82424016	18028	Nfib	GO:0003700	DNA binding transcription factor activity
XR_878410.2	XM_006537654.3	0.814355	0.00126	predicted gene%2C 41920	NC_000067.7:93467526-93482407	nuclear factor I/B%2C transcript variant X2	NC_000070.7:82208409-82424988	18028	Nfib	GO:0003700	DNA binding transcription factor activity
XR_878410.2	NM_029868.3	0.814602	0.001252	predicted gene%2C 41920	NC_000067.7:93467526-93482407	GC-rich promoter binding protein 1-like 1%2C transcript variant 1	NC_000070.7:116414854-116451099	77110	Gpbp1l1	GO:0003700	DNA binding transcription factor activity
XR_878410.2	NM_001290696.1	0.936658	7e-06	predicted gene%2C 41920	NC_000067.7:93467526-93482407	forkhead box J3%2C transcript variant 2	NC_000070.7:119396857-119486316	230700	Foxj3	GO:0003700	DNA binding transcription factor activity
XR_878410.2	XM_030253743.2	-0.719415	0.008354	predicted gene%2C 41920	NC_000067.7:93467526-93482407	arginine glutamic acid dipeptide (RE) repeats%2C transcript variant X4	NC_000070.7:150365371-150706423	68703	Rere	GO:0003700	DNA binding transcription factor activity
XR_878410.2	XM_030253751.2	-0.767521	0.003565	predicted gene%2C 41920	NC_000067.7:93467526-93482407	arginine glutamic acid dipeptide (RE) repeats%2C transcript variant X15	NC_000070.7:150561931-150706423	68703	Rere	GO:0003700	DNA binding transcription factor activity
XR_878410.2	XM_006503796.5	0.885747	0.000126	predicted gene%2C 41920	NC_000067.7:93467526-93482407	recombination signal binding protein for immunoglobulin kappa J region%2C transcript variant X1	NC_000071.7:53766547-53814703	19664	Rbpj	GO:0003700	DNA binding transcription factor activity
XR_878410.2	NM_133921.3	0.769466	0.00343	predicted gene%2C 41920	NC_000067.7:93467526-93482407	nuclear transcription factor%2C X-box binding-like 1%2C transcript variant 1	NC_000071.7:72670646-72716988	100978	Nfxl1	GO:0003700	DNA binding transcription factor activity
XR_878410.2	NM_198052.2	-0.720759	0.008177	predicted gene%2C 41920	NC_000067.7:93467526-93482407	T-box 3%2C transcript variant 2	NC_000071.7:119808926-119822789	21386	Tbx3	GO:0003700	DNA binding transcription factor activity
XR_878410.2	XM_006504628.4	0.77331	0.003176	predicted gene%2C 41920	NC_000067.7:93467526-93482407	zinc finger with KRAB and SCAN domains 1%2C transcript variant X1	NC_000071.7:138083311-138106084	74570	Zkscan1	GO:0003700	DNA binding transcription factor activity
XR_878410.2	NM_199068.2	0.708939	0.009841	predicted gene%2C 41920	NC_000067.7:93467526-93482407	forkhead box K1	NC_000071.7:142387251-142447770	17425	Foxk1	GO:0003700	DNA binding transcription factor activity
XR_878410.2	NM_016683.2	0.829585	0.000844	predicted gene%2C 41920	NC_000067.7:93467526-93482407	zinc finger with KRAB and SCAN domains 5%2C transcript variant 1	NC_000071.7:145141368-145158560	22757	Zkscan5	GO:0003700	DNA binding transcription factor activity
XR_878410.2	XM_006505906.5	0.718326	0.008501	predicted gene%2C 41920	NC_000067.7:93467526-93482407	nuclear receptor subfamily 2%2C group C%2C member 2%2C transcript variant X4	NC_000072.7:92068483-92148962	22026	Nr2c2	GO:0003700	DNA binding transcription factor activity
XR_878410.2	TCONS_00009475	0.825422	0.000945	predicted gene%2C 41920	NC_000067.7:93467526-93482407	TCONS_00009475	NC_000073.7:12531329-12532991	232875	Zscan18	GO:0003700	DNA binding transcription factor activity
XR_878410.2	TCONS_00010406	0.925588	1.6e-05	predicted gene%2C 41920	NC_000067.7:93467526-93482407	TCONS_00010406	NC_000073.7:19339987-19354009	19698	Relb	GO:0003700	DNA binding transcription factor activity
XR_878410.2	TCONS_00010553	0.920422	2.2e-05	predicted gene%2C 41920	NC_000067.7:93467526-93482407	TCONS_00010553	NC_000073.7:34611846-34755991	12611	Cebpg	GO:0003700	DNA binding transcription factor activity
XR_878410.2	XM_006507606.2	0.799204	0.001815	predicted gene%2C 41920	NC_000067.7:93467526-93482407	CREB/ATF bZIP transcription factor%2C transcript variant X1	NC_000073.7:90091941-90097590	233490	Crebzf	GO:0003700	DNA binding transcription factor activity
XR_878410.2	NM_145151.3	0.901441	6.2e-05	predicted gene%2C 41920	NC_000067.7:93467526-93482407	CREB/ATF bZIP transcription factor%2C transcript variant 1	NC_000073.7:90091988-90097251	233490	Crebzf	GO:0003700	DNA binding transcription factor activity
XR_878410.2	NM_001166585.2	0.832088	0.000787	predicted gene%2C 41920	NC_000067.7:93467526-93482407	TEA domain family member 1%2C transcript variant 3	NC_000073.7:112278562-112505991	21676	Tead1	GO:0003700	DNA binding transcription factor activity
XR_878410.2	XM_011242265.3	0.857573	0.000362	predicted gene%2C 41920	NC_000067.7:93467526-93482407	nuclear receptor subfamily 2%2C group F%2C member 6%2C transcript variant X4	NC_000074.7:71826761-71831012	13864	Nr2f6	GO:0003700	DNA binding transcription factor activity
XR_878410.2	NM_010150.2	0.823563	0.000993	predicted gene%2C 41920	NC_000067.7:93467526-93482407	nuclear receptor subfamily 2%2C group F%2C member 6	NC_000074.7:71826762-71834596	13864	Nr2f6	GO:0003700	DNA binding transcription factor activity
XR_878410.2	NM_008539.4	0.809621	0.001417	predicted gene%2C 41920	NC_000067.7:93467526-93482407	SMAD family member 1	NC_000074.7:80065023-80126057	17125	Smad1	GO:0003700	DNA binding transcription factor activity
XR_878410.2	XM_036153804.1	-0.766713	0.003622	predicted gene%2C 41920	NC_000067.7:93467526-93482407	nuclear factor I/X%2C transcript variant X20	NC_000074.7:85431345-85527086	18032	Nfix	GO:0003700	DNA binding transcription factor activity
XR_878410.2	NM_001033161.2	0.796559	0.001928	predicted gene%2C 41920	NC_000067.7:93467526-93482407	TNFRSF1A-associated via death domain	NC_000074.7:105985206-105991226	71609	Tradd	GO:0003700	DNA binding transcription factor activity
XR_878410.2	NM_010901.3	0.749075	0.005049	predicted gene%2C 41920	NC_000067.7:93467526-93482407	nuclear factor of activated T cells%2C cytoplasmic%2C calcineurin dependent 3%2C transcript variant 1	NC_000074.7:106786221-106857169	18021	Nfatc3	GO:0003700	DNA binding transcription factor activity
XR_878410.2	TCONS_00011736	0.756036	0.004443	predicted gene%2C 41920	NC_000067.7:93467526-93482407	TCONS_00011736	NC_000074.7:108020101-108106142	54446	Nfat5	GO:0003700	DNA binding transcription factor activity
XR_878410.2	NM_001301811.1	0.815316	0.00123	predicted gene%2C 41920	NC_000067.7:93467526-93482407	interferon regulatory factor 8%2C transcript variant 1	NC_000074.7:121465377-121483433	15900	Irf8	GO:0003700	DNA binding transcription factor activity
XR_878410.2	TCONS_00012478	0.840048	0.000626	predicted gene%2C 41920	NC_000067.7:93467526-93482407	TCONS_00012478	NC_000074.7:123351876-123404914	12398	Cbfa2t3	GO:0003700	DNA binding transcription factor activity
XR_878410.2	NM_008026.5	0.717168	0.008658	predicted gene%2C 41920	NC_000067.7:93467526-93482407	Friend leukemia integration 1	NC_000075.7:32333499-32452748	14247	Fli1	GO:0003700	DNA binding transcription factor activity
XR_878410.2	NM_001372534.1	0.767793	0.003546	predicted gene%2C 41920	NC_000067.7:93467526-93482407	E26 avian leukemia oncogene 1%2C 5' domain%2C transcript variant 3	NC_000075.7:32547536-32669116	23871	Ets1	GO:0003700	DNA binding transcription factor activity
XR_878410.2	NM_001359464.1	0.807405	0.001495	predicted gene%2C 41920	NC_000067.7:93467526-93482407	zinc finger protein 202%2C transcript variant 2	NC_000075.7:40103611-40124900	80902	Zfp202	GO:0003700	DNA binding transcription factor activity
XR_878410.2	NM_183316.2	-0.834973	0.000726	predicted gene%2C 41920	NC_000067.7:93467526-93482407	small nuclear RNA activating complex%2C polypeptide 5	NC_000075.7:64086578-64089970	330959	Snapc5	GO:0003700	DNA binding transcription factor activity
XR_878410.2	NM_023814.4	0.889143	0.000109	predicted gene%2C 41920	NC_000067.7:93467526-93482407	T-box18	NC_000075.7:87584852-87613313	76365	Tbx18	GO:0003700	DNA binding transcription factor activity
XR_878410.2	NM_026756.2	-0.79391	0.002048	predicted gene%2C 41920	NC_000067.7:93467526-93482407	nuclear factor I/C%2C transcript variant 2	NC_000076.7:81232024-81263007	18029	Nfic	GO:0003700	DNA binding transcription factor activity
XR_878410.2	XM_030244940.1	-0.738027	0.006136	predicted gene%2C 41920	NC_000067.7:93467526-93482407	nuclear factor I/C%2C transcript variant X2	NC_000076.7:81232024-81267753	18029	Nfic	GO:0003700	DNA binding transcription factor activity
XR_878410.2	NM_009284.2	0.834292	0.00074	predicted gene%2C 41920	NC_000067.7:93467526-93482407	signal transducer and activator of transcription 6	NC_000076.7:127478854-127496856	20852	Stat6	GO:0003700	DNA binding transcription factor activity
XR_878410.2	NM_013842.3	0.875307	0.000192	predicted gene%2C 41920	NC_000067.7:93467526-93482407	X-box binding protein 1%2C transcript variant 1	NC_000077.7:5470640-5475993	22433	Xbp1	GO:0003700	DNA binding transcription factor activity
XR_878410.2	NM_009044.3	0.710915	0.009546	predicted gene%2C 41920	NC_000067.7:93467526-93482407	reticuloendotheliosis oncogene	NC_000077.7:23686846-23720969	19696	Rel	GO:0003700	DNA binding transcription factor activity
XR_878410.2	XM_030246033.1	-0.725107	0.007621	predicted gene%2C 41920	NC_000067.7:93467526-93482407	zinc finger with KRAB and SCAN domains 17%2C transcript variant X8	NC_000077.7:59376345-59397082	268417	Zkscan17	GO:0003700	DNA binding transcription factor activity
XR_878410.2	NM_007840.3	0.905154	5.1e-05	predicted gene%2C 41920	NC_000067.7:93467526-93482407	DEAD box helicase 5	NC_000077.7:106671181-106679320	13207	Ddx5	GO:0000988	transcription factor activity, protein binding
XR_878410.2	TCONS_00017083	0.910046	4e-05	predicted gene%2C 41920	NC_000067.7:93467526-93482407	TCONS_00017083	NC_000077.7:106673520-106679733	13207	Ddx5	GO:0000988	transcription factor activity, protein binding
XR_878410.2	NM_033270.2	0.760586	0.004077	predicted gene%2C 41920	NC_000067.7:93467526-93482407	E2F transcription factor 6%2C transcript variant 1	NC_000078.7:16860965-16876753	50496	E2f6	GO:0003700	DNA binding transcription factor activity
XR_878410.2	XM_030247246.2	0.766185	0.00366	predicted gene%2C 41920	NC_000067.7:93467526-93482407	zinc finger and SCAN domain containing 12%2C transcript variant X1	NC_000079.7:21546981-21556458	22758	Zscan12	GO:0003700	DNA binding transcription factor activity
XR_878410.2	NM_010151.3	0.739666	0.005964	predicted gene%2C 41920	NC_000067.7:93467526-93482407	nuclear receptor subfamily 2%2C group F%2C member 1%2C transcript variant 1	NC_000079.7:78337091-78346992	13865	Nr2f1	GO:0003700	DNA binding transcription factor activity
XR_878410.2	NM_011243.2	0.816023	0.001208	predicted gene%2C 41920	NC_000067.7:93467526-93482407	retinoic acid receptor%2C beta%2C transcript variant beta2	NC_000080.7:5894286-6038924	218772	Rarb	GO:0003700	DNA binding transcription factor activity
XR_878410.2	NM_009366.4	0.772205	0.003248	predicted gene%2C 41920	NC_000067.7:93467526-93482407	TSC22 domain family%2C member 1%2C transcript variant 2	NC_000080.7:76741949-76745205	21807	Tsc22d1	GO:0003700	DNA binding transcription factor activity
XR_878410.2	NM_007920.4	0.845088	0.000538	predicted gene%2C 41920	NC_000067.7:93467526-93482407	E74-like factor 1%2C transcript variant 1	NC_000080.7:79718633-79819931	13709	Elf1	GO:0003700	DNA binding transcription factor activity
XR_878410.2	XM_030247642.2	0.72517	0.007613	predicted gene%2C 41920	NC_000067.7:93467526-93482407	E74-like factor 1%2C transcript variant X2	NC_000080.7:79718992-79811082	13709	Elf1	GO:0003700	DNA binding transcription factor activity
XR_878410.2	XM_017316729.3	0.701827	0.010956	predicted gene%2C 41920	NC_000067.7:93467526-93482407	metadherin%2C transcript variant X4	NC_000081.7:34082612-34143683	67154	Mtdh	GO:0003700	DNA binding transcription factor activity
XR_878410.2	NM_032000.2	0.725145	0.007616	predicted gene%2C 41920	NC_000067.7:93467526-93482407	transcriptional repressor GATA binding 1%2C transcript variant 2	NC_000081.7:50518152-50753437	83925	Trps1	GO:0003700	DNA binding transcription factor activity
XR_878410.2	NM_009716.3	0.732027	0.006796	predicted gene%2C 41920	NC_000067.7:93467526-93482407	activating transcription factor 4%2C transcript variant 1	NC_000081.7:80139384-80141746	11911	Atf4	GO:0003700	DNA binding transcription factor activity
XR_878410.2	XM_011245517.4	-0.704293	0.010559	predicted gene%2C 41920	NC_000067.7:93467526-93482407	peroxisome proliferator activated receptor alpha%2C transcript variant X3	NC_000081.7:85619111-85691052	19013	Ppara	GO:0003700	DNA binding transcription factor activity
XR_878410.2	NM_007497.3	0.94317	4e-06	predicted gene%2C 41920	NC_000067.7:93467526-93482407	activating transcription factor 1	NC_000081.7:100125739-100159129	11908	Atf1	GO:0003700	DNA binding transcription factor activity
XR_878410.2	XM_006520351.5	0.793793	0.002053	predicted gene%2C 41920	NC_000067.7:93467526-93482407	activating transcription factor 1%2C transcript variant X1	NC_000081.7:100126109-100159129	11908	Atf1	GO:0003700	DNA binding transcription factor activity
XR_878410.2	NM_148924.3	0.748755	0.005078	predicted gene%2C 41920	NC_000067.7:93467526-93482407	zinc finger protein 263	NC_000082.7:3561962-3568652	74120	Zfp263	GO:0003700	DNA binding transcription factor activity
XR_878410.2	NM_001081217.1	0.846316	0.000519	predicted gene%2C 41920	NC_000067.7:93467526-93482407	zinc finger protein 174	NC_000082.7:3665086-3676744	385674	Zfp174	GO:0003700	DNA binding transcription factor activity
XR_878410.2	XM_006521754.5	0.790656	0.002201	predicted gene%2C 41920	NC_000067.7:93467526-93482407	CREB binding protein%2C transcript variant X4	NC_000082.7:3899197-4031864	12914	Crebbp	GO:0000988	transcription factor activity, protein binding
XR_878410.2	NM_001025432.1	-0.849142	0.000475	predicted gene%2C 41920	NC_000067.7:93467526-93482407	CREB binding protein	NC_000082.7:3901911-4031268	12914	Crebbp	GO:0000988	transcription factor activity, protein binding
XR_878410.2	NM_023794.2	0.787186	0.002375	predicted gene%2C 41920	NC_000067.7:93467526-93482407	ets variant 5%2C transcript variant 2	NC_000082.7:22200062-22258320	104156	Etv5	GO:0003700	DNA binding transcription factor activity
XR_878410.2	NM_011809.3	0.877277	0.000178	predicted gene%2C 41920	NC_000067.7:93467526-93482407	E26 avian leukemia oncogene 2%2C 3' domain	NC_000082.7:95503273-95522093	23872	Ets2	GO:0003700	DNA binding transcription factor activity
XR_878410.2	NM_001033496.3	0.863953	0.000291	predicted gene%2C 41920	NC_000067.7:93467526-93482407	zinc finger protein 213	NC_000083.7:23775740-23783200	449521	Zfp213	GO:0003700	DNA binding transcription factor activity
XR_878410.2	TCONS_00022266	0.811312	0.001359	predicted gene%2C 41920	NC_000067.7:93467526-93482407	TCONS_00022266	NC_000083.7:34247248-34257377	20182	Rxrb	GO:0003700	DNA binding transcription factor activity
XR_878410.2	NM_001205214.1	-0.757877	0.004292	predicted gene%2C 41920	NC_000067.7:93467526-93482407	retinoid X receptor beta%2C transcript variant 1	NC_000083.7:34250785-34257377	20182	Rxrb	GO:0003700	DNA binding transcription factor activity
XR_878410.2	NM_011306.4	-0.881153	0.000152	predicted gene%2C 41920	NC_000067.7:93467526-93482407	retinoid X receptor beta%2C transcript variant 2	NC_000083.7:34250785-34257377	20182	Rxrb	GO:0003700	DNA binding transcription factor activity
XR_878410.2	NM_017406.4	0.70622	0.010257	predicted gene%2C 41920	NC_000067.7:93467526-93482407	activating transcription factor 6 beta	NC_000083.7:34866119-34874048	12915	Atf6b	GO:0003700	DNA binding transcription factor activity
XR_878410.2	NM_001357447.1	0.856576	0.000374	predicted gene%2C 41920	NC_000067.7:93467526-93482407	zinc finger protein 24%2C transcript variant 2	NC_000084.7:24142773-24153427	59057	Zfp24	GO:0003700	DNA binding transcription factor activity
XR_878410.2	NM_001357448.1	0.830274	0.000828	predicted gene%2C 41920	NC_000067.7:93467526-93482407	zinc finger protein 24%2C transcript variant 3	NC_000084.7:24142773-24153427	59057	Zfp24	GO:0003700	DNA binding transcription factor activity
XR_878410.2	NM_001361211.1	0.885868	0.000126	predicted gene%2C 41920	NC_000067.7:93467526-93482407	nuclear receptor subfamily 3%2C group C%2C member 1%2C transcript variant 4	NC_000084.7:39543597-39622829	14815	Nr3c1	GO:0003700	DNA binding transcription factor activity
XR_878410.2	NM_001361209.1	0.811537	0.001352	predicted gene%2C 41920	NC_000067.7:93467526-93482407	nuclear receptor subfamily 3%2C group C%2C member 1%2C transcript variant 2	NC_000084.7:39543597-39623723	14815	Nr3c1	GO:0003700	DNA binding transcription factor activity
XR_878410.2	NM_001164110.1	0.761272	0.004024	predicted gene%2C 41920	NC_000067.7:93467526-93482407	nuclear factor of activated T cells%2C cytoplasmic%2C calcineurin dependent 1%2C transcript variant 4	NC_000084.7:80649419-80756286	18018	Nfatc1	GO:0003700	DNA binding transcription factor activity
XR_878410.2	NM_007953.2	0.801659	0.001714	predicted gene%2C 41920	NC_000067.7:93467526-93482407	estrogen related receptor%2C alpha	NC_000085.7:6888344-6899176	26379	Esrra	GO:0003700	DNA binding transcription factor activity
XR_878410.2	XM_030250732.2	0.731881	0.006812	predicted gene%2C 41920	NC_000067.7:93467526-93482407	conserved helix-loop-helix ubiquitous kinase%2C transcript variant X1	NC_000085.7:44064204-44095938	12675	Chuk	GO:0003700	DNA binding transcription factor activity
XR_878410.2	XM_036162179.1	0.765651	0.003698	predicted gene%2C 41920	NC_000067.7:93467526-93482407	activating transcription factor 1%2C pseudogene	NC_000086.8:52885449-52886480	100040260	Atf1-ps	GO:0003700	DNA binding transcription factor activity
XR_878410.2	NM_018789.2	0.839121	0.000644	predicted gene%2C 41920	NC_000067.7:93467526-93482407	forkhead box O4	NC_000086.8:100298133-100304479	54601	Foxo4	GO:0003700	DNA binding transcription factor activity
XR_878410.2	TCONS_00025637	0.845972	0.000524	predicted gene%2C 41920	NC_000067.7:93467526-93482407	TCONS_00025637	NC_000086.8:139474353-139499523	14605	Tsc22d3	GO:0003700	DNA binding transcription factor activity
TCONS_00000375	XM_017319360.3	0.702191	0.010897	TCONS_00000375	NC_000067.7:93782622-93850660	POU domain%2C class 2%2C transcription factor 1%2C transcript variant X5	NC_000067.7:165692718-165802814	18986	Pou2f1	GO:0003700	DNA binding transcription factor activity
TCONS_00000375	TCONS_00001431	0.819068	0.001117	TCONS_00000375	NC_000067.7:93782622-93850660	TCONS_00001431	NC_000067.7:167947715-168259738	18514	Pbx1	GO:0003700	DNA binding transcription factor activity
TCONS_00000375	NM_011305.3	0.87512	0.000193	TCONS_00000375	NC_000067.7:93782622-93850660	retinoid X receptor alpha%2C transcript variant 1	NC_000068.8:27567212-27653331	20181	Rxra	GO:0003700	DNA binding transcription factor activity
TCONS_00000375	NM_020255.3	-0.799285	0.001812	TCONS_00000375	NC_000067.7:93782622-93850660	SCAN domain-containing 1	NC_000068.8:156153765-156154624	19018	Scand1	GO:0003700	DNA binding transcription factor activity
TCONS_00000375	NM_007892.2	0.729342	0.007107	TCONS_00000375	NC_000067.7:93782622-93850660	E2F transcription factor 5	NC_000069.7:14643730-14671369	13559	E2f5	GO:0003700	DNA binding transcription factor activity
TCONS_00000375	XM_006502034.5	0.726748	0.007419	TCONS_00000375	NC_000067.7:93782622-93850660	E74-like factor 2%2C transcript variant X13	NC_000069.7:51162705-51184879	69257	Elf2	GO:0003700	DNA binding transcription factor activity
TCONS_00000375	TCONS_00003816	0.780244	0.002754	TCONS_00000375	NC_000067.7:93782622-93850660	TCONS_00003816	NC_000069.7:52175757-52235699	56458	Foxo1	GO:0003700	DNA binding transcription factor activity
TCONS_00000375	NM_019739.3	0.863411	0.000296	TCONS_00000375	NC_000067.7:93782622-93850660	forkhead box O1	NC_000069.7:52175757-52257530	56458	Foxo1	GO:0003700	DNA binding transcription factor activity
TCONS_00000375	NM_001081229.2	0.833023	0.000767	TCONS_00000375	NC_000067.7:93782622-93850660	TSC22 domain family%2C member 2%2C transcript variant 1	NC_000069.7:58322140-58374208	72033	Tsc22d2	GO:0003700	DNA binding transcription factor activity
TCONS_00000375	NM_011281.3	0.843503	0.000565	TCONS_00000375	NC_000067.7:93782622-93850660	RAR-related orphan receptor gamma%2C transcript variant 1	NC_000069.7:94280100-94305583	19885	Rorc	GO:0003700	DNA binding transcription factor activity
TCONS_00000375	NM_023214.7	0.741515	0.005775	TCONS_00000375	NC_000067.7:93782622-93850660	solute carrier family 30 (zinc transporter)%2C member 7	NC_000069.7:115732621-115801055	66500	Slc30a7	GO:0003700	DNA binding transcription factor activity
TCONS_00000375	NM_008689.2	0.707628	0.01004	TCONS_00000375	NC_000067.7:93782622-93850660	nuclear factor of kappa light polypeptide gene enhancer in B cells 1%2C p105	NC_000069.7:135290415-135397308	18033	Nfkb1	GO:0003700	DNA binding transcription factor activity
TCONS_00000375	XM_006537572.3	0.76913	0.003453	TCONS_00000375	NC_000067.7:93782622-93850660	RUNX1 translocation partner 1%2C transcript variant X6	NC_000070.7:13743746-13895056	12395	Runx1t1	GO:0003700	DNA binding transcription factor activity
TCONS_00000375	XM_006537653.5	0.738281	0.006109	TCONS_00000375	NC_000067.7:93782622-93850660	nuclear factor I/B%2C transcript variant X1	NC_000070.7:82208409-82422947	18028	Nfib	GO:0003700	DNA binding transcription factor activity
TCONS_00000375	XM_036163812.1	-0.787544	0.002357	TCONS_00000375	NC_000067.7:93782622-93850660	nuclear factor I/B%2C transcript variant X3	NC_000070.7:82208409-82422947	18028	Nfib	GO:0003700	DNA binding transcription factor activity
TCONS_00000375	XM_006537654.3	0.775411	0.003043	TCONS_00000375	NC_000067.7:93782622-93850660	nuclear factor I/B%2C transcript variant X2	NC_000070.7:82208409-82424988	18028	Nfib	GO:0003700	DNA binding transcription factor activity
TCONS_00000375	XM_030253745.2	-0.75278	0.004719	TCONS_00000375	NC_000067.7:93782622-93850660	arginine glutamic acid dipeptide (RE) repeats%2C transcript variant X7	NC_000070.7:150452812-150706423	68703	Rere	GO:0003700	DNA binding transcription factor activity
TCONS_00000375	XM_036164921.1	0.743173	0.005609	TCONS_00000375	NC_000067.7:93782622-93850660	recombination signal binding protein for immunoglobulin kappa J region%2C transcript variant X4	NC_000071.7:53759203-53814703	19664	Rbpj	GO:0003700	DNA binding transcription factor activity
TCONS_00000375	XM_006503796.5	0.770594	0.003354	TCONS_00000375	NC_000067.7:93782622-93850660	recombination signal binding protein for immunoglobulin kappa J region%2C transcript variant X1	NC_000071.7:53766547-53814703	19664	Rbpj	GO:0003700	DNA binding transcription factor activity
TCONS_00000375	NM_133921.3	0.85366	0.000411	TCONS_00000375	NC_000067.7:93782622-93850660	nuclear transcription factor%2C X-box binding-like 1%2C transcript variant 1	NC_000071.7:72670646-72716988	100978	Nfxl1	GO:0003700	DNA binding transcription factor activity
TCONS_00000375	NM_011537.3	-0.714767	0.008992	TCONS_00000375	NC_000067.7:93782622-93850660	T-box 5	NC_000071.7:119972727-120023283	21388	Tbx5	GO:0003700	DNA binding transcription factor activity
TCONS_00000375	NM_133906.4	0.716021	0.008816	TCONS_00000375	NC_000067.7:93782622-93850660	zinc finger with KRAB and SCAN domains 1%2C transcript variant 1	NC_000071.7:138083345-138106084	74570	Zkscan1	GO:0003700	DNA binding transcription factor activity
TCONS_00000375	NM_016683.2	0.711839	0.009411	TCONS_00000375	NC_000067.7:93782622-93850660	zinc finger with KRAB and SCAN domains 5%2C transcript variant 1	NC_000071.7:145141368-145158560	22757	Zkscan5	GO:0003700	DNA binding transcription factor activity
TCONS_00000375	XM_036166087.1	0.885616	0.000127	TCONS_00000375	NC_000067.7:93782622-93850660	cAMP responsive element binding protein-like 2%2C transcript variant X2	NC_000072.7:134807422-134835894	232430	Crebl2	GO:0003700	DNA binding transcription factor activity
TCONS_00000375	TCONS_00010406	0.708463	0.009913	TCONS_00000375	NC_000067.7:93782622-93850660	TCONS_00010406	NC_000073.7:19339987-19354009	19698	Relb	GO:0003700	DNA binding transcription factor activity
TCONS_00000375	TCONS_00010553	0.748626	0.00509	TCONS_00000375	NC_000067.7:93782622-93850660	TCONS_00010553	NC_000073.7:34611846-34755991	12611	Cebpg	GO:0003700	DNA binding transcription factor activity
TCONS_00000375	XM_006540596.4	-0.710949	0.009541	TCONS_00000375	NC_000067.7:93782622-93850660	D site albumin promoter binding protein%2C transcript variant X1	NC_000073.7:45354517-45359579	13170	Dbp	GO:0003700	DNA binding transcription factor activity
TCONS_00000375	NM_001382511.1	-0.816154	0.001204	TCONS_00000375	NC_000067.7:93782622-93850660	zinc finger and SCAN domain containing 2%2C transcript variant 2	NC_000073.7:80510678-80526290	22691	Zscan2	GO:0003700	DNA binding transcription factor activity
TCONS_00000375	NM_145151.3	0.759852	0.004135	TCONS_00000375	NC_000067.7:93782622-93850660	CREB/ATF bZIP transcription factor%2C transcript variant 1	NC_000073.7:90091988-90097251	233490	Crebzf	GO:0003700	DNA binding transcription factor activity
TCONS_00000375	NM_001166585.2	0.720657	0.00819	TCONS_00000375	NC_000067.7:93782622-93850660	TEA domain family member 1%2C transcript variant 3	NC_000073.7:112278562-112505991	21676	Tead1	GO:0003700	DNA binding transcription factor activity
TCONS_00000375	NM_010150.2	0.812238	0.001328	TCONS_00000375	NC_000067.7:93782622-93850660	nuclear receptor subfamily 2%2C group F%2C member 6	NC_000074.7:71826762-71834596	13864	Nr2f6	GO:0003700	DNA binding transcription factor activity
TCONS_00000375	NM_001297601.2	0.748283	0.005121	TCONS_00000375	NC_000067.7:93782622-93850660	nuclear factor I/X%2C transcript variant 4	NC_000074.7:85431340-85500039	18032	Nfix	GO:0003700	DNA binding transcription factor activity
TCONS_00000375	XM_036153804.1	-0.762848	0.003904	TCONS_00000375	NC_000067.7:93782622-93850660	nuclear factor I/X%2C transcript variant X20	NC_000074.7:85431345-85527086	18032	Nfix	GO:0003700	DNA binding transcription factor activity
TCONS_00000375	NM_022309.4	0.756089	0.004438	TCONS_00000375	NC_000067.7:93782622-93850660	core binding factor beta%2C transcript variant 1	NC_000074.7:105897305-105944621	12400	Cbfb	GO:0000988	transcription factor activity, protein binding
TCONS_00000375	NM_001301811.1	0.77262	0.003221	TCONS_00000375	NC_000067.7:93782622-93850660	interferon regulatory factor 8%2C transcript variant 1	NC_000074.7:121465377-121483433	15900	Irf8	GO:0003700	DNA binding transcription factor activity
TCONS_00000375	TCONS_00012478	0.781432	0.002686	TCONS_00000375	NC_000067.7:93782622-93850660	TCONS_00012478	NC_000074.7:123351876-123404914	12398	Cbfa2t3	GO:0003700	DNA binding transcription factor activity
TCONS_00000375	NM_001372534.1	0.824885	0.000959	TCONS_00000375	NC_000067.7:93782622-93850660	E26 avian leukemia oncogene 1%2C 5' domain%2C transcript variant 3	NC_000075.7:32547536-32669116	23871	Ets1	GO:0003700	DNA binding transcription factor activity
TCONS_00000375	NM_183316.2	-0.83684	0.000688	TCONS_00000375	NC_000067.7:93782622-93850660	small nuclear RNA activating complex%2C polypeptide 5	NC_000075.7:64086578-64089970	330959	Snapc5	GO:0003700	DNA binding transcription factor activity
TCONS_00000375	TCONS_00013921	0.817327	0.001168	TCONS_00000375	NC_000067.7:93782622-93850660	TCONS_00013921	NC_000075.7:122677987-122695059	235682	Zfp445	GO:0003700	DNA binding transcription factor activity
TCONS_00000375	TCONS_00013922	0.732923	0.006694	TCONS_00000375	NC_000067.7:93782622-93850660	TCONS_00013922	NC_000075.7:122677987-122695059	235682	Zfp445	GO:0003700	DNA binding transcription factor activity
TCONS_00000375	NM_026756.2	-0.713388	0.009187	TCONS_00000375	NC_000067.7:93782622-93850660	nuclear factor I/C%2C transcript variant 2	NC_000076.7:81232024-81263007	18029	Nfic	GO:0003700	DNA binding transcription factor activity
TCONS_00000375	NM_001322268.1	0.79167	0.002153	TCONS_00000375	NC_000067.7:93782622-93850660	ELK3%2C member of ETS oncogene family%2C transcript variant 2	NC_000076.7:93083277-93147021	13713	Elk3	GO:0003700	DNA binding transcription factor activity
TCONS_00000375	NM_009284.2	0.859764	0.000336	TCONS_00000375	NC_000067.7:93782622-93850660	signal transducer and activator of transcription 6	NC_000076.7:127478854-127496856	20852	Stat6	GO:0003700	DNA binding transcription factor activity
TCONS_00000375	NM_013842.3	0.777367	0.002923	TCONS_00000375	NC_000067.7:93782622-93850660	X-box binding protein 1%2C transcript variant 1	NC_000077.7:5470640-5475993	22433	Xbp1	GO:0003700	DNA binding transcription factor activity
TCONS_00000375	NM_009024.2	-0.737745	0.006166	TCONS_00000375	NC_000067.7:93782622-93850660	retinoic acid receptor%2C alpha%2C transcript variant 1	NC_000077.7:98828521-98865768	19401	Rara	GO:0003700	DNA binding transcription factor activity
TCONS_00000375	NM_001113563.2	0.776508	0.002975	TCONS_00000375	NC_000067.7:93782622-93850660	signal transducer and activator of transcription 5B%2C transcript variant 2	NC_000077.7:100671556-100741407	20851	Stat5b	GO:0003700	DNA binding transcription factor activity
TCONS_00000375	TCONS_00017083	0.766465	0.00364	TCONS_00000375	NC_000067.7:93782622-93850660	TCONS_00017083	NC_000077.7:106673520-106679733	13207	Ddx5	GO:0000988	transcription factor activity, protein binding
TCONS_00000375	NM_033270.2	0.840559	0.000617	TCONS_00000375	NC_000067.7:93782622-93850660	E2F transcription factor 6%2C transcript variant 1	NC_000078.7:16860965-16876753	50496	E2f6	GO:0003700	DNA binding transcription factor activity
TCONS_00000375	NM_011243.2	0.899663	6.8e-05	TCONS_00000375	NC_000067.7:93782622-93850660	retinoic acid receptor%2C beta%2C transcript variant beta2	NC_000080.7:5894286-6038924	218772	Rarb	GO:0003700	DNA binding transcription factor activity
TCONS_00000375	NM_009366.4	0.83147	0.000801	TCONS_00000375	NC_000067.7:93782622-93850660	TSC22 domain family%2C member 1%2C transcript variant 2	NC_000080.7:76741949-76745205	21807	Tsc22d1	GO:0003700	DNA binding transcription factor activity
TCONS_00000375	NM_007920.4	0.775615	0.00303	TCONS_00000375	NC_000067.7:93782622-93850660	E74-like factor 1%2C transcript variant 1	NC_000080.7:79718633-79819931	13709	Elf1	GO:0003700	DNA binding transcription factor activity
TCONS_00000375	NM_001357925.1	0.748405	0.00511	TCONS_00000375	NC_000067.7:93782622-93850660	metadherin%2C transcript variant 2	NC_000081.7:34082864-34143683	67154	Mtdh	GO:0003700	DNA binding transcription factor activity
TCONS_00000375	NM_001357926.1	0.801156	0.001735	TCONS_00000375	NC_000067.7:93782622-93850660	metadherin%2C transcript variant 1	NC_000081.7:34082864-34143683	67154	Mtdh	GO:0003700	DNA binding transcription factor activity
TCONS_00000375	NM_001331154.1	-0.727685	0.007305	TCONS_00000375	NC_000067.7:93782622-93850660	heat shock factor 1%2C transcript variant 3	NC_000081.7:76361561-76385355	15499	Hsf1	GO:0003700	DNA binding transcription factor activity
TCONS_00000375	NM_001025432.1	-0.74193	0.005733	TCONS_00000375	NC_000067.7:93782622-93850660	CREB binding protein	NC_000082.7:3901911-4031268	12914	Crebbp	GO:0000988	transcription factor activity, protein binding
TCONS_00000375	NM_011809.3	0.766773	0.003618	TCONS_00000375	NC_000067.7:93782622-93850660	E26 avian leukemia oncogene 2%2C 3' domain	NC_000082.7:95503273-95522093	23872	Ets2	GO:0003700	DNA binding transcription factor activity
TCONS_00000375	NM_001033496.3	0.721979	0.008018	TCONS_00000375	NC_000067.7:93782622-93850660	zinc finger protein 213	NC_000083.7:23775740-23783200	449521	Zfp213	GO:0003700	DNA binding transcription factor activity
TCONS_00000375	TCONS_00022266	0.898566	7.1e-05	TCONS_00000375	NC_000067.7:93782622-93850660	TCONS_00022266	NC_000083.7:34247248-34257377	20182	Rxrb	GO:0003700	DNA binding transcription factor activity
TCONS_00000375	NM_001205214.1	-0.863109	0.000299	TCONS_00000375	NC_000067.7:93782622-93850660	retinoid X receptor beta%2C transcript variant 1	NC_000083.7:34250785-34257377	20182	Rxrb	GO:0003700	DNA binding transcription factor activity
TCONS_00000375	NM_011306.4	-0.850746	0.000452	TCONS_00000375	NC_000067.7:93782622-93850660	retinoid X receptor beta%2C transcript variant 2	NC_000083.7:34250785-34257377	20182	Rxrb	GO:0003700	DNA binding transcription factor activity
TCONS_00000375	NM_017406.4	0.841968	0.000592	TCONS_00000375	NC_000067.7:93782622-93850660	activating transcription factor 6 beta	NC_000083.7:34866119-34874048	12915	Atf6b	GO:0003700	DNA binding transcription factor activity
TCONS_00000375	NM_001374803.1	0.763558	0.003851	TCONS_00000375	NC_000067.7:93782622-93850660	nuclear transcription factor-Y alpha%2C transcript variant 5	NC_000083.7:48693912-48716782	18044	Nfya	GO:0003700	DNA binding transcription factor activity
TCONS_00000375	XM_017318022.3	0.758077	0.004276	TCONS_00000375	NC_000067.7:93782622-93850660	zinc finger and SCAN domain containing 30%2C transcript variant X1	NC_000084.7:24095824-24120362	328918	Zscan30	GO:0003700	DNA binding transcription factor activity
TCONS_00000375	NM_001357447.1	0.857085	0.000368	TCONS_00000375	NC_000067.7:93782622-93850660	zinc finger protein 24%2C transcript variant 2	NC_000084.7:24142773-24153427	59057	Zfp24	GO:0003700	DNA binding transcription factor activity
TCONS_00000375	NM_010754.5	0.738273	0.00611	TCONS_00000375	NC_000067.7:93782622-93850660	SMAD family member 2%2C transcript variant 1	NC_000084.7:76374771-76444818	17126	Smad2	GO:0003700	DNA binding transcription factor activity
TCONS_00000375	NM_007953.2	0.78019	0.002757	TCONS_00000375	NC_000067.7:93782622-93850660	estrogen related receptor%2C alpha	NC_000085.7:6888344-6899176	26379	Esrra	GO:0003700	DNA binding transcription factor activity
TCONS_00000375	XM_036162179.1	0.757369	0.004333	TCONS_00000375	NC_000067.7:93782622-93850660	activating transcription factor 1%2C pseudogene	NC_000086.8:52885449-52886480	100040260	Atf1-ps	GO:0003700	DNA binding transcription factor activity
TCONS_00000375	NM_013476.4	0.72417	0.007738	TCONS_00000375	NC_000067.7:93782622-93850660	androgen receptor	NC_000086.8:97192362-97366824	11835	Ar	GO:0003700	DNA binding transcription factor activity
TCONS_00000375	NM_018789.2	0.895401	8.3e-05	TCONS_00000375	NC_000067.7:93782622-93850660	forkhead box O4	NC_000086.8:100298133-100304479	54601	Foxo4	GO:0003700	DNA binding transcription factor activity
TCONS_00001152	XM_036157707.1	0.73134	0.006874	TCONS_00001152	NC_000067.7:95758453-95759854	activating transcription factor 2%2C transcript variant X8	NC_000068.8:73646861-73722908	11909	Atf2	GO:0003700	DNA binding transcription factor activity
TCONS_00001152	XM_036157694.1	0.708741	0.009871	TCONS_00001152	NC_000067.7:95758453-95759854	activating transcription factor 2%2C transcript variant X5	NC_000068.8:73646861-73722984	11909	Atf2	GO:0003700	DNA binding transcription factor activity
TCONS_00001152	XM_011239589.4	0.73081	0.006936	TCONS_00001152	NC_000067.7:95758453-95759854	MAX gene associated%2C transcript variant X8	NC_000068.8:119716771-119800610	29808	Mga	GO:0003700	DNA binding transcription factor activity
TCONS_00001152	XM_006501164.4	0.74885	0.005069	TCONS_00001152	NC_000067.7:95758453-95759854	RAR-related orphan receptor gamma%2C transcript variant X3	NC_000069.7:94280105-94298474	19885	Rorc	GO:0003700	DNA binding transcription factor activity
TCONS_00001152	XM_030253743.2	-0.710412	0.009621	TCONS_00001152	NC_000067.7:95758453-95759854	arginine glutamic acid dipeptide (RE) repeats%2C transcript variant X4	NC_000070.7:150365371-150706423	68703	Rere	GO:0003700	DNA binding transcription factor activity
TCONS_00001152	XM_030253751.2	-0.740913	0.005836	TCONS_00001152	NC_000067.7:95758453-95759854	arginine glutamic acid dipeptide (RE) repeats%2C transcript variant X15	NC_000070.7:150561931-150706423	68703	Rere	GO:0003700	DNA binding transcription factor activity
TCONS_00001152	TCONS_00005659	0.738086	0.00613	TCONS_00001152	NC_000067.7:95758453-95759854	TCONS_00005659	NC_000070.7:150652957-150706423	68703	Rere	GO:0003700	DNA binding transcription factor activity
TCONS_00001152	NM_016683.2	0.759873	0.004133	TCONS_00001152	NC_000067.7:95758453-95759854	zinc finger with KRAB and SCAN domains 5%2C transcript variant 1	NC_000071.7:145141368-145158560	22757	Zkscan5	GO:0003700	DNA binding transcription factor activity
TCONS_00001152	XM_006505308.5	-0.718994	0.008411	TCONS_00001152	NC_000067.7:95758453-95759854	forkhead box P1%2C transcript variant X1	NC_000072.7:98902302-99499705	108655	Foxp1	GO:0003700	DNA binding transcription factor activity
TCONS_00001152	TCONS_00010553	0.745901	0.005345	TCONS_00001152	NC_000067.7:95758453-95759854	TCONS_00010553	NC_000073.7:34611846-34755991	12611	Cebpg	GO:0003700	DNA binding transcription factor activity
TCONS_00001152	TCONS_00010633	0.700725	0.011137	TCONS_00001152	NC_000067.7:95758453-95759854	TCONS_00010633	NC_000073.7:45354305-45370301	56632	Sphk2	GO:0003700	DNA binding transcription factor activity
TCONS_00001152	NM_145151.3	0.741913	0.005735	TCONS_00001152	NC_000067.7:95758453-95759854	CREB/ATF bZIP transcription factor%2C transcript variant 1	NC_000073.7:90091988-90097251	233490	Crebzf	GO:0003700	DNA binding transcription factor activity
TCONS_00001152	NM_001161458.1	0.719592	0.008331	TCONS_00001152	NC_000067.7:95758453-95759854	core binding factor beta%2C transcript variant 4	NC_000074.7:105897305-105944621	12400	Cbfb	GO:0000988	transcription factor activity, protein binding
TCONS_00001152	NM_183316.2	-0.732784	0.006709	TCONS_00001152	NC_000067.7:95758453-95759854	small nuclear RNA activating complex%2C polypeptide 5	NC_000075.7:64086578-64089970	330959	Snapc5	GO:0003700	DNA binding transcription factor activity
TCONS_00001152	XM_030244940.1	-0.703317	0.010715	TCONS_00001152	NC_000067.7:95758453-95759854	nuclear factor I/C%2C transcript variant X2	NC_000076.7:81232024-81267753	18029	Nfic	GO:0003700	DNA binding transcription factor activity
TCONS_00001152	NM_013842.3	0.798688	0.001837	TCONS_00001152	NC_000067.7:95758453-95759854	X-box binding protein 1%2C transcript variant 1	NC_000077.7:5470640-5475993	22433	Xbp1	GO:0003700	DNA binding transcription factor activity
TCONS_00001152	XM_006532721.3	0.804062	0.00162	TCONS_00001152	NC_000067.7:95758453-95759854	signal transducer and activator of transcription 5A%2C transcript variant X1	NC_000077.7:100751028-100775995	20850	Stat5a	GO:0003700	DNA binding transcription factor activity
TCONS_00001152	XM_011244745.3	0.764015	0.003817	TCONS_00001152	NC_000067.7:95758453-95759854	thyroid hormone receptor beta%2C transcript variant X18	NC_000080.7:4431605-4808786	21834	Thrb	GO:0003700	DNA binding transcription factor activity
TCONS_00001152	NM_007679.4	0.74234	0.005692	TCONS_00001152	NC_000067.7:95758453-95759854	CCAAT/enhancer binding protein (C/EBP)%2C delta	NC_000082.7:15705149-15707409	12609	Cebpd	GO:0003700	DNA binding transcription factor activity
TCONS_00001152	XM_006523793.3	0.7365	0.006299	TCONS_00001152	NC_000067.7:95758453-95759854	nuclear transcription factor-Y alpha%2C transcript variant X3	NC_000083.7:48693912-48716783	18044	Nfya	GO:0003700	DNA binding transcription factor activity
TCONS_00001152	XM_030249553.1	0.769911	0.0034	TCONS_00001152	NC_000067.7:95758453-95759854	nuclear transcription factor-Y alpha%2C transcript variant X5	NC_000083.7:48693912-48716805	18044	Nfya	GO:0003700	DNA binding transcription factor activity
TCONS_00001152	XM_017317292.3	0.770292	0.003374	TCONS_00001152	NC_000067.7:95758453-95759854	nuclear transcription factor-Y alpha%2C transcript variant X2	NC_000083.7:48693912-48716820	18044	Nfya	GO:0003700	DNA binding transcription factor activity
TCONS_00001152	NM_001311066.1	0.712952	0.00925	TCONS_00001152	NC_000067.7:95758453-95759854	cAMP responsive element modulator%2C transcript variant 17	NC_000084.7:3266353-3281132	12916	Crem	GO:0003700	DNA binding transcription factor activity
TCONS_00001152	XM_011246996.3	0.709845	0.009705	TCONS_00001152	NC_000067.7:95758453-95759854	zinc finger protein 397%2C transcript variant X1	NC_000084.7:24085797-24097728	69256	Zfp397	GO:0003700	DNA binding transcription factor activity
TCONS_00001152	TCONS_00025632	0.740457	0.005883	TCONS_00001152	NC_000067.7:95758453-95759854	TCONS_00025632	NC_000086.8:139440276-139447588	14605	Tsc22d3	GO:0003700	DNA binding transcription factor activity
TCONS_00001152	TCONS_00025637	0.761267	0.004025	TCONS_00001152	NC_000067.7:95758453-95759854	TCONS_00025637	NC_000086.8:139474353-139499523	14605	Tsc22d3	GO:0003700	DNA binding transcription factor activity
NR_037993.1	XM_030252077.2	0.88679	0.000121	RIKEN cDNA B230216N24 gene	NC_000067.7:97958847-97975518	nuclear receptor coactivator 2%2C transcript variant X11	NC_000067.7:13212641-13364673	17978	Ncoa2	GO:0000988	transcription factor activity, protein binding
NR_037993.1	NM_001205314.1	0.711347	0.009483	RIKEN cDNA B230216N24 gene	NC_000067.7:97958847-97975518	signal transducer and activator of transcription 1%2C transcript variant 3	NC_000067.7:52158596-52201024	20846	Stat1	GO:0003700	DNA binding transcription factor activity
NR_037993.1	NM_001357627.1	0.72847	0.007211	RIKEN cDNA B230216N24 gene	NC_000067.7:97958847-97975518	signal transducer and activator of transcription 1%2C transcript variant 4	NC_000067.7:52158596-52201024	20846	Stat1	GO:0003700	DNA binding transcription factor activity
NR_037993.1	NM_001159731.1	0.886942	0.00012	RIKEN cDNA B230216N24 gene	NC_000067.7:97958847-97975518	retinoid X receptor gamma%2C transcript variant 2	NC_000067.7:167445833-167467192	20183	Rxrg	GO:0003700	DNA binding transcription factor activity
NR_037993.1	NM_001081304.1	0.750228	0.004944	RIKEN cDNA B230216N24 gene	NC_000067.7:97958847-97975518	activating transcription factor 6	NC_000067.7:170532025-170695340	226641	Atf6	GO:0003700	DNA binding transcription factor activity
NR_037993.1	NM_011305.3	0.776924	0.00295	RIKEN cDNA B230216N24 gene	NC_000067.7:97958847-97975518	retinoid X receptor alpha%2C transcript variant 1	NC_000068.8:27567212-27653331	20181	Rxra	GO:0003700	DNA binding transcription factor activity
NR_037993.1	NM_178778.3	0.876111	0.000186	RIKEN cDNA B230216N24 gene	NC_000067.7:97958847-97975518	suppressor of cancer cell invasion	NC_000068.8:38956225-39080742	320271	Scai	GO:0000988	transcription factor activity, protein binding
NR_037993.1	XM_036157713.1	0.848373	0.000487	RIKEN cDNA B230216N24 gene	NC_000067.7:97958847-97975518	activating transcription factor 2%2C transcript variant X23	NC_000068.8:73660896-73722972	11909	Atf2	GO:0003700	DNA binding transcription factor activity
NR_037993.1	NM_012051.4	0.871576	0.000221	RIKEN cDNA B230216N24 gene	NC_000067.7:97958847-97975518	ets variant 3%2C transcript variant 3	NC_000069.7:87432884-87447465	27049	Etv3	GO:0003700	DNA binding transcription factor activity
NR_037993.1	NM_023214.7	0.85539	0.000389	RIKEN cDNA B230216N24 gene	NC_000067.7:97958847-97975518	solute carrier family 30 (zinc transporter)%2C member 7	NC_000069.7:115732621-115801055	66500	Slc30a7	GO:0003700	DNA binding transcription factor activity
NR_037993.1	XM_036163227.1	0.848442	0.000485	RIKEN cDNA B230216N24 gene	NC_000067.7:97958847-97975518	solute carrier family 30 (zinc transporter)%2C member 7%2C transcript variant X1	NC_000069.7:115765490-115801079	66500	Slc30a7	GO:0003700	DNA binding transcription factor activity
NR_037993.1	XM_030253119.2	0.72084	0.008166	RIKEN cDNA B230216N24 gene	NC_000067.7:97958847-97975518	RUNX1 translocation partner 1%2C transcript variant X7	NC_000070.7:13797031-13895056	12395	Runx1t1	GO:0003700	DNA binding transcription factor activity
NR_037993.1	NM_013497.4	0.874609	0.000197	RIKEN cDNA B230216N24 gene	NC_000067.7:97958847-97975518	cAMP responsive element binding protein 3	NC_000070.7:43562657-43567061	12913	Creb3	GO:0003700	DNA binding transcription factor activity
NR_037993.1	NM_008687.6	0.875957	0.000187	RIKEN cDNA B230216N24 gene	NC_000067.7:97958847-97975518	nuclear factor I/B%2C transcript variant 3	NC_000070.7:82208409-82424016	18028	Nfib	GO:0003700	DNA binding transcription factor activity
NR_037993.1	NM_001368177.1	0.809316	0.001427	RIKEN cDNA B230216N24 gene	NC_000067.7:97958847-97975518	GC-rich promoter binding protein 1-like 1%2C transcript variant 2	NC_000070.7:116415275-116451099	77110	Gpbp1l1	GO:0003700	DNA binding transcription factor activity
NR_037993.1	NM_001290696.1	0.892389	9.5e-05	RIKEN cDNA B230216N24 gene	NC_000067.7:97958847-97975518	forkhead box J3%2C transcript variant 2	NC_000070.7:119396857-119486316	230700	Foxj3	GO:0003700	DNA binding transcription factor activity
NR_037993.1	NM_133921.3	0.725711	0.007546	RIKEN cDNA B230216N24 gene	NC_000067.7:97958847-97975518	nuclear transcription factor%2C X-box binding-like 1%2C transcript variant 1	NC_000071.7:72670646-72716988	100978	Nfxl1	GO:0003700	DNA binding transcription factor activity
NR_037993.1	NM_016683.2	0.7524	0.004752	RIKEN cDNA B230216N24 gene	NC_000067.7:97958847-97975518	zinc finger with KRAB and SCAN domains 5%2C transcript variant 1	NC_000071.7:145141368-145158560	22757	Zkscan5	GO:0003700	DNA binding transcription factor activity
NR_037993.1	XM_006505320.4	0.723589	0.007812	RIKEN cDNA B230216N24 gene	NC_000067.7:97958847-97975518	forkhead box P1%2C transcript variant X29	NC_000072.7:98902302-99030079	108655	Foxp1	GO:0003700	DNA binding transcription factor activity
NR_037993.1	XM_030242427.2	0.768597	0.00349	RIKEN cDNA B230216N24 gene	NC_000067.7:97958847-97975518	zinc finger and SCAN domain containing 22%2C transcript variant X1	NC_000073.7:12637897-12642986	232878	Zscan22	GO:0003700	DNA binding transcription factor activity
NR_037993.1	TCONS_00010406	0.835749	0.00071	RIKEN cDNA B230216N24 gene	NC_000067.7:97958847-97975518	TCONS_00010406	NC_000073.7:19339987-19354009	19698	Relb	GO:0003700	DNA binding transcription factor activity
NR_037993.1	XM_006507606.2	0.778943	0.002829	RIKEN cDNA B230216N24 gene	NC_000067.7:97958847-97975518	CREB/ATF bZIP transcription factor%2C transcript variant X1	NC_000073.7:90091941-90097590	233490	Crebzf	GO:0003700	DNA binding transcription factor activity
NR_037993.1	XM_011242265.3	0.7925	0.002113	RIKEN cDNA B230216N24 gene	NC_000067.7:97958847-97975518	nuclear receptor subfamily 2%2C group F%2C member 6%2C transcript variant X4	NC_000074.7:71826761-71831012	13864	Nr2f6	GO:0003700	DNA binding transcription factor activity
NR_037993.1	NM_001033161.2	0.702297	0.01088	RIKEN cDNA B230216N24 gene	NC_000067.7:97958847-97975518	TNFRSF1A-associated via death domain	NC_000074.7:105985206-105991226	71609	Tradd	GO:0003700	DNA binding transcription factor activity
NR_037993.1	NM_010901.3	0.745217	0.00541	RIKEN cDNA B230216N24 gene	NC_000067.7:97958847-97975518	nuclear factor of activated T cells%2C cytoplasmic%2C calcineurin dependent 3%2C transcript variant 1	NC_000074.7:106786221-106857169	18021	Nfatc3	GO:0003700	DNA binding transcription factor activity
NR_037993.1	TCONS_00011736	0.836777	0.000689	RIKEN cDNA B230216N24 gene	NC_000067.7:97958847-97975518	TCONS_00011736	NC_000074.7:108020101-108106142	54446	Nfat5	GO:0003700	DNA binding transcription factor activity
NR_037993.1	NM_001301811.1	0.707607	0.010043	RIKEN cDNA B230216N24 gene	NC_000067.7:97958847-97975518	interferon regulatory factor 8%2C transcript variant 1	NC_000074.7:121465377-121483433	15900	Irf8	GO:0003700	DNA binding transcription factor activity
NR_037993.1	NM_020496.3	0.773552	0.00316	RIKEN cDNA B230216N24 gene	NC_000067.7:97958847-97975518	T-box 20%2C transcript variant 2	NC_000075.7:24651543-24685599	57246	Tbx20	GO:0003700	DNA binding transcription factor activity
NR_037993.1	NM_001359464.1	0.751762	0.004808	RIKEN cDNA B230216N24 gene	NC_000067.7:97958847-97975518	zinc finger protein 202%2C transcript variant 2	NC_000075.7:40103611-40124900	80902	Zfp202	GO:0003700	DNA binding transcription factor activity
NR_037993.1	NM_023814.4	0.731367	0.006871	RIKEN cDNA B230216N24 gene	NC_000067.7:97958847-97975518	T-box18	NC_000075.7:87584852-87613313	76365	Tbx18	GO:0003700	DNA binding transcription factor activity
NR_037993.1	NM_007840.3	0.896277	7.9e-05	RIKEN cDNA B230216N24 gene	NC_000067.7:97958847-97975518	DEAD box helicase 5	NC_000077.7:106671181-106679320	13207	Ddx5	GO:0000988	transcription factor activity, protein binding
NR_037993.1	TCONS_00017083	0.742756	0.005651	RIKEN cDNA B230216N24 gene	NC_000067.7:97958847-97975518	TCONS_00017083	NC_000077.7:106673520-106679733	13207	Ddx5	GO:0000988	transcription factor activity, protein binding
NR_037993.1	XM_030247246.2	0.735841	0.00637	RIKEN cDNA B230216N24 gene	NC_000067.7:97958847-97975518	zinc finger and SCAN domain containing 12%2C transcript variant X1	NC_000079.7:21546981-21556458	22758	Zscan12	GO:0003700	DNA binding transcription factor activity
NR_037993.1	NM_001039115.2	0.720878	0.008161	RIKEN cDNA B230216N24 gene	NC_000067.7:97958847-97975518	zinc finger with KRAB and SCAN domains 4	NC_000079.7:21663018-21669677	544922	Zkscan4	GO:0003700	DNA binding transcription factor activity
NR_037993.1	NM_010151.3	0.702276	0.010883	RIKEN cDNA B230216N24 gene	NC_000067.7:97958847-97975518	nuclear receptor subfamily 2%2C group F%2C member 1%2C transcript variant 1	NC_000079.7:78337091-78346992	13865	Nr2f1	GO:0003700	DNA binding transcription factor activity
NR_037993.1	TCONS_00019973	0.817585	0.001161	RIKEN cDNA B230216N24 gene	NC_000067.7:97958847-97975518	TCONS_00019973	NC_000080.7:63436369-63506854	14463	Gata4	GO:0003700	DNA binding transcription factor activity
NR_037993.1	TCONS_00020420	0.735729	0.006383	RIKEN cDNA B230216N24 gene	NC_000067.7:97958847-97975518	TCONS_00020420	NC_000081.7:81686912-81711064	21685	Tef	GO:0003700	DNA binding transcription factor activity
NR_037993.1	NM_001113418.1	0.746198	0.005316	RIKEN cDNA B230216N24 gene	NC_000067.7:97958847-97975518	peroxisome proliferator activated receptor alpha%2C transcript variant 2	NC_000081.7:85619764-85691052	19013	Ppara	GO:0003700	DNA binding transcription factor activity
[truncated: 58,860 more rows]
