# Supplementary material for: Novel Transcriptomic Interactomes of Noncoding RNAs in the Heart under Altered Thyroid Hormonal States
Source: Int J Mol Sci. 2023 Mar 31;24(7):6560. doi: 10.3390/ijms24076560 (PMC10095585; doi:10.3390/ijms24076560)
Supplement: Supplementary file 1 [file ijms-24-06560-s001.zip › Supplemental File S17 LncRNA Targets PPI.xlsx]

## Sheet: HypoTH vs Control
Protein_id1	Gene_id1	Official_Symbol	Description	Protein_id2	Gene_id2	Official_Symbol	Description	PPI_score
ENSMUSP00000006037	17978	Ncoa2	Ncoa2	ENSMUSP00000103544	22260	Nr1h2	Nr1h2	701
ENSMUSP00000023165	12914	Crebbp	Crebbp	ENSMUSP00000023612	23872	Ets2	Ets2	701
ENSMUSP00000065363	18030	Nfil3	Nfil3	ENSMUSP00000069505	217166	Nr1d1	Nr1d1	701
ENSMUSP00000065363	18030	Nfil3	Nfil3	ENSMUSP00000069505	21833	Thra	Thra	701
ENSMUSP00000006037	17978	Ncoa2	Ncoa2	ENSMUSP00000022304	21834	Thrb	Thrb	705
ENSMUSP00000057253	69256	Zfp397	Zfp397	ENSMUSP00000064637	59057	Zfp24	Zfp24	707
ENSMUSP00000095199	14815	Nr3c1	Nr3c1	ENSMUSP00000140112	12912	Creb1	Creb1	707
ENSMUSP00000018748	21386	Tbx3	Tbx3	ENSMUSP00000041774	14465	Gata6	Gata6	709
ENSMUSP00000027941	11910	Atf3	Atf3	ENSMUSP00000027974	226641	Atf6	Atf6	709
ENSMUSP00000033939	16150	Ikbkb	Ikbkb	ENSMUSP00000092355	19698	Relb	Relb	709
ENSMUSP00000052648	11835	Ar	Ar	ENSMUSP00000140112	12912	Creb1	Creb1	709
ENSMUSP00000018407	21388	Tbx5	Tbx5	ENSMUSP00000041774	14465	Gata6	Gata6	711
ENSMUSP00000006037	17978	Ncoa2	Ncoa2	ENSMUSP00000106988	22259	Nr1h3	Nr1h3	712
ENSMUSP00000027941	11910	Atf3	Atf3	ENSMUSP00000072617	15499	Hsf1	Hsf1	713
ENSMUSP00000027941	11910	Atf3	Atf3	ENSMUSP00000034973	17127	Smad3	Smad3	714
ENSMUSP00000031545	114142	Foxp2	Foxp2	ENSMUSP00000094916	74123	Foxp4	Foxp4	714
ENSMUSP00000025393	17128	Smad4	Smad4	ENSMUSP00000066927	14463	Gata4	Gata4	717
ENSMUSP00000066927	14463	Gata4	Gata4	ENSMUSP00000130115	17126	Smad2	Smad2	718
ENSMUSP00000027941	11910	Atf3	Atf3	ENSMUSP00000066743	20846	Stat1	Stat1	719
ENSMUSP00000066789	328572	Ep300	Ep300	ENSMUSP00000106988	22259	Nr1h3	Nr1h3	719
ENSMUSP00000093959	23942	Mta2	Mta2	ENSMUSP00000112915	27049	Etv3	Etv3	720
ENSMUSP00000074198	18019	Nfatc2	Nfatc2	ENSMUSP00000094916	74123	Foxp4	Foxp4	721
ENSMUSP00000041774	14465	Gata6	Gata6	ENSMUSP00000052591	57246	Tbx20	Tbx20	722
ENSMUSP00000000450	19016	Pparg	Pparg	ENSMUSP00000089708	20852	Stat6	Stat6	723
ENSMUSP00000015197	14461	Gata2	Gata2	ENSMUSP00000096129	12606	Cebpa	Cebpa	723
ENSMUSP00000029812	18033	Nfkb1	Nfkb1	ENSMUSP00000050683	56484	Foxo3	Foxo3	723
ENSMUSP00000096129	12606	Cebpa	Cebpa	ENSMUSP00000140112	12912	Creb1	Creb1	727
ENSMUSP00000055308	56458	Foxo1	Foxo1	ENSMUSP00000095199	14815	Nr3c1	Nr3c1	728
ENSMUSP00000055308	56458	Foxo1	Foxo1	ENSMUSP00000105234	11911	Atf4	Atf4	729
ENSMUSP00000129001	18018	Nfatc1	Nfatc1	ENSMUSP00000140112	12912	Creb1	Creb1	730
ENSMUSP00000027941	11910	Atf3	Atf3	ENSMUSP00000120152	20848	Stat3	Stat3	731
ENSMUSP00000023165	12914	Crebbp	Crebbp	ENSMUSP00000095199	14815	Nr3c1	Nr3c1	732
ENSMUSP00000064637	59057	Zfp24	Zfp24	ENSMUSP00000105211	19018	Scand1	Scand1	733
ENSMUSP00000076491	20181	Rxra	Rxra	ENSMUSP00000103544	22260	Nr1h2	Nr1h2	733
ENSMUSP00000074198	18019	Nfatc2	Nfatc2	ENSMUSP00000135181	108655	Foxp1	Foxp1	735
ENSMUSP00000120152	20848	Stat3	Stat3	ENSMUSP00000140112	12912	Creb1	Creb1	736
ENSMUSP00000102981	20851	Stat5b	Stat5b	ENSMUSP00000120525	16391	Irf9	Irf9	737
ENSMUSP00000044517	21807	Tsc22d1	Tsc22d1	ENSMUSP00000108620	14605	Tsc22d3	Tsc22d3	738
ENSMUSP00000050683	56484	Foxo3	Foxo3	ENSMUSP00000072617	15499	Hsf1	Hsf1	740
ENSMUSP00000021674	14281	Fos	Fos	ENSMUSP00000066743	20846	Stat1	Stat1	741
ENSMUSP00000057651	232878	Zscan22	Zscan22	ENSMUSP00000105211	19018	Scand1	Scand1	741
ENSMUSP00000065363	18030	Nfil3	Nfil3	ENSMUSP00000088031	353187	Nr1d2	Nr1d2	742
ENSMUSP00000000450	19016	Pparg	Pparg	ENSMUSP00000140112	12912	Creb1	Creb1	744
ENSMUSP00000066789	328572	Ep300	Ep300	ENSMUSP00000096129	12606	Cebpa	Cebpa	746
ENSMUSP00000096688	72033	Tsc22d2	Tsc22d2	ENSMUSP00000108620	14605	Tsc22d3	Tsc22d3	748
ENSMUSP00000040694	19664	Rbpj	Rbpj	ENSMUSP00000129001	18018	Nfatc1	Nfatc1	749
ENSMUSP00000022304	21834	Thrb	Thrb	ENSMUSP00000023165	12914	Crebbp	Crebbp	752
ENSMUSP00000038532	231991	Creb5	Creb5	ENSMUSP00000092901	16478	Jund	Jund	752
ENSMUSP00000000450	19016	Pparg	Pparg	ENSMUSP00000105211	19018	Scand1	Scand1	753
ENSMUSP00000040208	208647	Creb3l2	Creb3l2	ENSMUSP00000047771	107503	Atf5	Atf5	754
ENSMUSP00000060671	21676	Tead1	Tead1	ENSMUSP00000103431	21677	Tead2	Tead2	755
ENSMUSP00000093959	23942	Mta2	Mta2	ENSMUSP00000101307	68703	Rere	Rere	756
ENSMUSP00000066789	328572	Ep300	Ep300	ENSMUSP00000066927	14463	Gata4	Gata4	757
ENSMUSP00000023165	12914	Crebbp	Crebbp	ENSMUSP00000034534	23871	Ets1	Ets1	758
ENSMUSP00000038532	231991	Creb5	Creb5	ENSMUSP00000104456	223922	Atf7	Atf7	760
ENSMUSP00000066789	328572	Ep300	Ep300	ENSMUSP00000121233	12916	Crem	Crem	760
ENSMUSP00000072617	15499	Hsf1	Hsf1	ENSMUSP00000078761	15500	Hsf2	Hsf2	760
ENSMUSP00000092901	16478	Jund	Jund	ENSMUSP00000107641	11909	Atf2	Atf2	760
ENSMUSP00000025906	26379	Esrra	Esrra	ENSMUSP00000082971	17977	Ncoa1	Ncoa1	763
ENSMUSP00000052648	11835	Ar	Ar	ENSMUSP00000093442	14009	Etv1	Etv1	763
ENSMUSP00000052648	11835	Ar	Ar	ENSMUSP00000093442	432800	Gm5454	Gm5454	763
ENSMUSP00000002320	19015	Ppard	Ppard	ENSMUSP00000082971	17977	Ncoa1	Ncoa1	765
ENSMUSP00000003640	14282	Fosb	Fosb	ENSMUSP00000023779	15370	Nr4a1	Nr4a1	765
ENSMUSP00000021674	14281	Fos	Fos	ENSMUSP00000104456	223922	Atf7	Atf7	769
ENSMUSP00000045805	385674	Zfp174	Zfp174	ENSMUSP00000064637	59057	Zfp24	Zfp24	769
ENSMUSP00000015987	20183	Rxrg	Rxrg	ENSMUSP00000106988	22259	Nr1h3	Nr1h3	770
ENSMUSP00000022304	21834	Thrb	Thrb	ENSMUSP00000066789	328572	Ep300	Ep300	773
ENSMUSP00000050683	56484	Foxo3	Foxo3	ENSMUSP00000140112	12912	Creb1	Creb1	773
ENSMUSP00000004145	20850	Stat5a	Stat5a	ENSMUSP00000040245	15900	Irf8	Irf8	777
ENSMUSP00000023024	21685	Tef	Tef	ENSMUSP00000069505	217166	Nr1d1	Nr1d1	780
ENSMUSP00000023024	21685	Tef	Tef	ENSMUSP00000069505	21833	Thra	Thra	780
ENSMUSP00000021674	14281	Fos	Fos	ENSMUSP00000038532	231991	Creb5	Creb5	785
ENSMUSP00000004145	20850	Stat5a	Stat5a	ENSMUSP00000120525	16391	Irf9	Irf9	787
ENSMUSP00000021674	14281	Fos	Fos	ENSMUSP00000121233	12916	Crem	Crem	787
ENSMUSP00000023165	12914	Crebbp	Crebbp	ENSMUSP00000023769	11908	Atf1	Atf1	787
ENSMUSP00000023165	12914	Crebbp	Crebbp	ENSMUSP00000023769	100040260	Atf1-ps	Atf1-ps	787
ENSMUSP00000029795	19885	Rorc	Rorc	ENSMUSP00000082971	17977	Ncoa1	Ncoa1	787
ENSMUSP00000021674	14281	Fos	Fos	ENSMUSP00000105234	11911	Atf4	Atf4	789
ENSMUSP00000055308	56458	Foxo1	Foxo1	ENSMUSP00000140112	12912	Creb1	Creb1	789
ENSMUSP00000096129	12606	Cebpa	Cebpa	ENSMUSP00000099434	13555	E2f1	E2f1	789
ENSMUSP00000018748	21386	Tbx3	Tbx3	ENSMUSP00000105833	26380	Esrrb	Esrrb	790
ENSMUSP00000034991	76365	Tbx18	Tbx18	ENSMUSP00000066927	14463	Gata4	Gata4	790
ENSMUSP00000089708	20852	Stat6	Stat6	ENSMUSP00000120525	16391	Irf9	Irf9	790
ENSMUSP00000066789	328572	Ep300	Ep300	ENSMUSP00000100872	20847	Stat2	Stat2	793
ENSMUSP00000082971	17977	Ncoa1	Ncoa1	ENSMUSP00000103544	22260	Nr1h2	Nr1h2	794
ENSMUSP00000000450	19016	Pparg	Pparg	ENSMUSP00000055308	56458	Foxo1	Foxo1	798
ENSMUSP00000023165	12914	Crebbp	Crebbp	ENSMUSP00000102981	20851	Stat5b	Stat5b	798
ENSMUSP00000066789	328572	Ep300	Ep300	ENSMUSP00000102981	20851	Stat5b	Stat5b	798
ENSMUSP00000064637	59057	Zfp24	Zfp24	ENSMUSP00000139601	225908	Myrf	Myrf	799
ENSMUSP00000023769	11908	Atf1	Atf1	ENSMUSP00000054852	22433	Xbp1	Xbp1	800
ENSMUSP00000023769	100040260	Atf1-ps	Atf1-ps	ENSMUSP00000054852	22433	Xbp1	Xbp1	800
ENSMUSP00000023165	12914	Crebbp	Crebbp	ENSMUSP00000026217	12675	Chuk	Chuk	802
ENSMUSP00000052648	11835	Ar	Ar	ENSMUSP00000120152	20848	Stat3	Stat3	802
ENSMUSP00000052648	11835	Ar	Ar	ENSMUSP00000082971	17977	Ncoa1	Ncoa1	803
ENSMUSP00000120152	20848	Stat3	Stat3	ENSMUSP00000130115	17126	Smad2	Smad2	803
ENSMUSP00000004145	20850	Stat5a	Stat5a	ENSMUSP00000066789	328572	Ep300	Ep300	804
ENSMUSP00000028663	26427	Creb3l1	Creb3l1	ENSMUSP00000038532	231991	Creb5	Creb5	804
ENSMUSP00000034973	17127	Smad3	Smad3	ENSMUSP00000066927	14463	Gata4	Gata4	805
ENSMUSP00000082971	17977	Ncoa1	Ncoa1	ENSMUSP00000095199	14815	Nr3c1	Nr3c1	806
ENSMUSP00000103544	22260	Nr1h2	Nr1h2	ENSMUSP00000106988	22259	Nr1h3	Nr1h3	806
ENSMUSP00000015605	12915	Atf6b	Atf6b	ENSMUSP00000038532	231991	Creb5	Creb5	807
ENSMUSP00000015605	12915	Atf6b	Atf6b	ENSMUSP00000107641	11909	Atf2	Atf2	807
ENSMUSP00000021674	14281	Fos	Fos	ENSMUSP00000023165	12914	Crebbp	Crebbp	808
ENSMUSP00000036585	20182	Rxrb	Rxrb	ENSMUSP00000106988	22259	Nr1h3	Nr1h3	808
ENSMUSP00000039073	269870	Zfp446	Zfp446	ENSMUSP00000064637	59057	Zfp24	Zfp24	808
ENSMUSP00000082971	17977	Ncoa1	Ncoa1	ENSMUSP00000105833	26380	Esrrb	Esrrb	809
ENSMUSP00000023165	12914	Crebbp	Crebbp	ENSMUSP00000059420	54601	Foxo4	Foxo4	812
ENSMUSP00000023769	11908	Atf1	Atf1	ENSMUSP00000028663	26427	Creb3l1	Creb3l1	812
ENSMUSP00000023769	100040260	Atf1-ps	Atf1-ps	ENSMUSP00000028663	26427	Creb3l1	Creb3l1	812
ENSMUSP00000028663	26427	Creb3l1	Creb3l1	ENSMUSP00000066789	328572	Ep300	Ep300	812
ENSMUSP00000029795	19885	Rorc	Rorc	ENSMUSP00000120152	20848	Stat3	Stat3	812
ENSMUSP00000021674	14281	Fos	Fos	ENSMUSP00000023779	15370	Nr4a1	Nr4a1	813
ENSMUSP00000074198	18019	Nfatc2	Nfatc2	ENSMUSP00000099928	19696	Rel	Rel	813
ENSMUSP00000100008	12913	Creb3	Creb3	ENSMUSP00000107641	11909	Atf2	Atf2	813
ENSMUSP00000082971	17977	Ncoa1	Ncoa1	ENSMUSP00000089708	20852	Stat6	Stat6	814
ENSMUSP00000099716	329934	Foxo6	Foxo6	ENSMUSP00000120152	20848	Stat3	Stat3	814
ENSMUSP00000015605	12915	Atf6b	Atf6b	ENSMUSP00000023769	11908	Atf1	Atf1	815
ENSMUSP00000015605	12915	Atf6b	Atf6b	ENSMUSP00000023769	100040260	Atf1-ps	Atf1-ps	815
ENSMUSP00000031545	114142	Foxp2	Foxp2	ENSMUSP00000074198	18019	Nfatc2	Nfatc2	816
ENSMUSP00000026217	12675	Chuk	Chuk	ENSMUSP00000099716	329934	Foxo6	Foxo6	819
ENSMUSP00000003284	54131	Irf3	Irf3	ENSMUSP00000066743	20846	Stat1	Stat1	820
ENSMUSP00000023165	12914	Crebbp	Crebbp	ENSMUSP00000100008	12913	Creb3	Creb3	820
ENSMUSP00000036585	20182	Rxrb	Rxrb	ENSMUSP00000103544	22260	Nr1h2	Nr1h2	820
ENSMUSP00000026217	12675	Chuk	Chuk	ENSMUSP00000059420	54601	Foxo4	Foxo4	821
ENSMUSP00000034973	17127	Smad3	Smad3	ENSMUSP00000120152	20848	Stat3	Stat3	821
ENSMUSP00000066789	328572	Ep300	Ep300	ENSMUSP00000100008	12913	Creb3	Creb3	821
ENSMUSP00000023769	11908	Atf1	Atf1	ENSMUSP00000038532	231991	Creb5	Creb5	822
ENSMUSP00000023769	100040260	Atf1-ps	Atf1-ps	ENSMUSP00000038532	231991	Creb5	Creb5	822
ENSMUSP00000038532	231991	Creb5	Creb5	ENSMUSP00000066789	328572	Ep300	Ep300	823
ENSMUSP00000054852	22433	Xbp1	Xbp1	ENSMUSP00000121233	12916	Crem	Crem	823
ENSMUSP00000028663	26427	Creb3l1	Creb3l1	ENSMUSP00000107641	11909	Atf2	Atf2	824
ENSMUSP00000023165	12914	Crebbp	Crebbp	ENSMUSP00000028663	26427	Creb3l1	Creb3l1	825
ENSMUSP00000089708	20852	Stat6	Stat6	ENSMUSP00000102981	20851	Stat5b	Stat5b	825
ENSMUSP00000023165	12914	Crebbp	Crebbp	ENSMUSP00000040208	208647	Creb3l2	Creb3l2	826
ENSMUSP00000003284	54131	Irf3	Irf3	ENSMUSP00000100872	20847	Stat2	Stat2	827
ENSMUSP00000023024	21685	Tef	Tef	ENSMUSP00000088031	353187	Nr1d2	Nr1d2	827
ENSMUSP00000023165	12914	Crebbp	Crebbp	ENSMUSP00000055308	56458	Foxo1	Foxo1	827
ENSMUSP00000033939	16150	Ikbkb	Ikbkb	ENSMUSP00000099716	329934	Foxo6	Foxo6	827
ENSMUSP00000021674	14281	Fos	Fos	ENSMUSP00000095199	14815	Nr3c1	Nr3c1	828
ENSMUSP00000040208	208647	Creb3l2	Creb3l2	ENSMUSP00000107641	11909	Atf2	Atf2	829
ENSMUSP00000033939	16150	Ikbkb	Ikbkb	ENSMUSP00000059420	54601	Foxo4	Foxo4	831
ENSMUSP00000104456	223922	Atf7	Atf7	ENSMUSP00000107641	11909	Atf2	Atf2	831
ENSMUSP00000026217	12675	Chuk	Chuk	ENSMUSP00000055308	56458	Foxo1	Foxo1	832
ENSMUSP00000000450	19016	Pparg	Pparg	ENSMUSP00000066789	328572	Ep300	Ep300	834
ENSMUSP00000040208	208647	Creb3l2	Creb3l2	ENSMUSP00000066789	328572	Ep300	Ep300	834
ENSMUSP00000004145	20850	Stat5a	Stat5a	ENSMUSP00000089708	20852	Stat6	Stat6	835
ENSMUSP00000034534	23871	Ets1	Ets1	ENSMUSP00000055308	56458	Foxo1	Foxo1	835
ENSMUSP00000023165	12914	Crebbp	Crebbp	ENSMUSP00000038532	231991	Creb5	Creb5	836
ENSMUSP00000024179	73181	Nfatc4	Nfatc4	ENSMUSP00000074198	18019	Nfatc2	Nfatc2	836
ENSMUSP00000038532	231991	Creb5	Creb5	ENSMUSP00000105234	11911	Atf4	Atf4	836
ENSMUSP00000038532	231991	Creb5	Creb5	ENSMUSP00000040208	208647	Creb3l2	Creb3l2	837
ENSMUSP00000040245	15900	Irf8	Irf8	ENSMUSP00000066743	20846	Stat1	Stat1	837
ENSMUSP00000015605	12915	Atf6b	Atf6b	ENSMUSP00000140112	12912	Creb1	Creb1	839
ENSMUSP00000026571	54123	Irf7	Irf7	ENSMUSP00000120525	16391	Irf9	Irf9	839
ENSMUSP00000121233	12916	Crem	Crem	ENSMUSP00000140112	12912	Creb1	Creb1	839
ENSMUSP00000015605	12915	Atf6b	Atf6b	ENSMUSP00000100008	12913	Creb3	Creb3	840
ENSMUSP00000055308	56458	Foxo1	Foxo1	ENSMUSP00000096129	12606	Cebpa	Cebpa	843
ENSMUSP00000015605	12915	Atf6b	Atf6b	ENSMUSP00000054852	22433	Xbp1	Xbp1	845
ENSMUSP00000059724	81703	Jdp2	Jdp2	ENSMUSP00000092901	16478	Jund	Jund	845
ENSMUSP00000066927	14463	Gata4	Gata4	ENSMUSP00000074198	18019	Nfatc2	Nfatc2	845
ENSMUSP00000023165	12914	Crebbp	Crebbp	ENSMUSP00000100872	20847	Stat2	Stat2	846
ENSMUSP00000040208	208647	Creb3l2	Creb3l2	ENSMUSP00000140112	12912	Creb1	Creb1	846
ENSMUSP00000015605	12915	Atf6b	Atf6b	ENSMUSP00000027974	226641	Atf6	Atf6	847
ENSMUSP00000015605	12915	Atf6b	Atf6b	ENSMUSP00000028663	26427	Creb3l1	Creb3l1	848
ENSMUSP00000023769	11908	Atf1	Atf1	ENSMUSP00000100008	12913	Creb3	Creb3	848
ENSMUSP00000023769	100040260	Atf1-ps	Atf1-ps	ENSMUSP00000100008	12913	Creb3	Creb3	848
ENSMUSP00000015605	12915	Atf6b	Atf6b	ENSMUSP00000040208	208647	Creb3l2	Creb3l2	849
ENSMUSP00000023779	15370	Nr4a1	Nr4a1	ENSMUSP00000076491	20181	Rxra	Rxra	849
ENSMUSP00000120152	20848	Stat3	Stat3	ENSMUSP00000120525	16391	Irf9	Irf9	849
ENSMUSP00000015987	20183	Rxrg	Rxrg	ENSMUSP00000023165	12914	Crebbp	Crebbp	850
ENSMUSP00000059420	54601	Foxo4	Foxo4	ENSMUSP00000120152	20848	Stat3	Stat3	850
ENSMUSP00000000450	19016	Pparg	Pparg	ENSMUSP00000096129	12606	Cebpa	Cebpa	851
ENSMUSP00000036585	20182	Rxrb	Rxrb	ENSMUSP00000105049	19013	Ppara	Ppara	851
ENSMUSP00000069505	217166	Nr1d1	Nr1d1	ENSMUSP00000079693	13170	Dbp	Dbp	851
ENSMUSP00000069505	21833	Thra	Thra	ENSMUSP00000079693	13170	Dbp	Dbp	851
ENSMUSP00000002320	19015	Ppard	Ppard	ENSMUSP00000036585	20182	Rxrb	Rxrb	852
ENSMUSP00000028663	26427	Creb3l1	Creb3l1	ENSMUSP00000040208	208647	Creb3l2	Creb3l2	852
ENSMUSP00000015987	20183	Rxrg	Rxrg	ENSMUSP00000066789	328572	Ep300	Ep300	854
ENSMUSP00000028663	26427	Creb3l1	Creb3l1	ENSMUSP00000140112	12912	Creb1	Creb1	854
ENSMUSP00000033939	16150	Ikbkb	Ikbkb	ENSMUSP00000055308	56458	Foxo1	Foxo1	855
ENSMUSP00000015987	20183	Rxrg	Rxrg	ENSMUSP00000105049	19013	Ppara	Ppara	857
ENSMUSP00000021674	14281	Fos	Fos	ENSMUSP00000059724	81703	Jdp2	Jdp2	858
ENSMUSP00000023769	11908	Atf1	Atf1	ENSMUSP00000040208	208647	Creb3l2	Creb3l2	858
ENSMUSP00000023769	100040260	Atf1-ps	Atf1-ps	ENSMUSP00000040208	208647	Creb3l2	Creb3l2	858
ENSMUSP00000038532	231991	Creb5	Creb5	ENSMUSP00000100008	12913	Creb3	Creb3	858
ENSMUSP00000126909	72504	Taf4b	Taf4b	ENSMUSP00000135193	225895	Taf6l	Taf6l	858
ENSMUSP00000015987	20183	Rxrg	Rxrg	ENSMUSP00000103544	22260	Nr1h2	Nr1h2	859
ENSMUSP00000105234	11911	Atf4	Atf4	ENSMUSP00000121233	12916	Crem	Crem	861
ENSMUSP00000054852	22433	Xbp1	Xbp1	ENSMUSP00000107641	11909	Atf2	Atf2	862
ENSMUSP00000066789	328572	Ep300	Ep300	ENSMUSP00000120152	20848	Stat3	Stat3	863
ENSMUSP00000023769	11908	Atf1	Atf1	ENSMUSP00000027941	11910	Atf3	Atf3	864
ENSMUSP00000023769	100040260	Atf1-ps	Atf1-ps	ENSMUSP00000027941	11910	Atf3	Atf3	864
ENSMUSP00000066789	328572	Ep300	Ep300	ENSMUSP00000105234	11911	Atf4	Atf4	865
ENSMUSP00000066927	14463	Gata4	Gata4	ENSMUSP00000129001	18018	Nfatc1	Nfatc1	865
ENSMUSP00000006761	12395	Runx1t1	Runx1t1	ENSMUSP00000096129	12606	Cebpa	Cebpa	867
ENSMUSP00000023165	12914	Crebbp	Crebbp	ENSMUSP00000036585	20182	Rxrb	Rxrb	868
ENSMUSP00000036585	20182	Rxrb	Rxrb	ENSMUSP00000066789	328572	Ep300	Ep300	868
ENSMUSP00000040208	208647	Creb3l2	Creb3l2	ENSMUSP00000100008	12913	Creb3	Creb3	869
ENSMUSP00000069505	217166	Nr1d1	Nr1d1	ENSMUSP00000078761	15500	Hsf2	Hsf2	869
ENSMUSP00000069505	21833	Thra	Thra	ENSMUSP00000078761	15500	Hsf2	Hsf2	869
ENSMUSP00000034973	17127	Smad3	Smad3	ENSMUSP00000036285	17130	Smad6	Smad6	870
ENSMUSP00000021674	14281	Fos	Fos	ENSMUSP00000082971	17977	Ncoa1	Ncoa1	871
ENSMUSP00000023165	12914	Crebbp	Crebbp	ENSMUSP00000121233	12916	Crem	Crem	871
ENSMUSP00000107641	11909	Atf2	Atf2	ENSMUSP00000121233	12916	Crem	Crem	871
ENSMUSP00000023769	11908	Atf1	Atf1	ENSMUSP00000107641	11909	Atf2	Atf2	872
ENSMUSP00000023769	100040260	Atf1-ps	Atf1-ps	ENSMUSP00000107641	11909	Atf2	Atf2	872
ENSMUSP00000069505	217166	Nr1d1	Nr1d1	ENSMUSP00000088031	353187	Nr1d2	Nr1d2	872
ENSMUSP00000069505	21833	Thra	Thra	ENSMUSP00000088031	353187	Nr1d2	Nr1d2	872
ENSMUSP00000002320	19015	Ppard	Ppard	ENSMUSP00000015987	20183	Rxrg	Rxrg	875
ENSMUSP00000023024	21685	Tef	Tef	ENSMUSP00000079693	13170	Dbp	Dbp	876
ENSMUSP00000036285	17130	Smad6	Smad6	ENSMUSP00000130115	17126	Smad2	Smad2	876
ENSMUSP00000040208	208647	Creb3l2	Creb3l2	ENSMUSP00000105234	11911	Atf4	Atf4	877
ENSMUSP00000052591	57246	Tbx20	Tbx20	ENSMUSP00000066927	14463	Gata4	Gata4	878
ENSMUSP00000052648	11835	Ar	Ar	ENSMUSP00000055308	56458	Foxo1	Foxo1	879
ENSMUSP00000038532	231991	Creb5	Creb5	ENSMUSP00000140112	12912	Creb1	Creb1	881
ENSMUSP00000023165	12914	Crebbp	Crebbp	ENSMUSP00000120152	20848	Stat3	Stat3	882
ENSMUSP00000028663	26427	Creb3l1	Creb3l1	ENSMUSP00000100008	12913	Creb3	Creb3	884
ENSMUSP00000089708	20852	Stat6	Stat6	ENSMUSP00000100872	20847	Stat2	Stat2	884
ENSMUSP00000021674	14281	Fos	Fos	ENSMUSP00000027941	11910	Atf3	Atf3	887
ENSMUSP00000026217	12675	Chuk	Chuk	ENSMUSP00000050683	56484	Foxo3	Foxo3	889
ENSMUSP00000066927	14463	Gata4	Gata4	ENSMUSP00000104931	18021	Nfatc3	Nfatc3	889
ENSMUSP00000100008	12913	Creb3	Creb3	ENSMUSP00000140112	12912	Creb1	Creb1	890
ENSMUSP00000015987	20183	Rxrg	Rxrg	ENSMUSP00000082971	17977	Ncoa1	Ncoa1	891
ENSMUSP00000066789	328572	Ep300	Ep300	ENSMUSP00000089708	20852	Stat6	Stat6	891
ENSMUSP00000036585	20182	Rxrb	Rxrb	ENSMUSP00000082971	17977	Ncoa1	Ncoa1	892
ENSMUSP00000054852	22433	Xbp1	Xbp1	ENSMUSP00000140112	12912	Creb1	Creb1	892
ENSMUSP00000023165	12914	Crebbp	Crebbp	ENSMUSP00000107641	11909	Atf2	Atf2	896
ENSMUSP00000105234	11911	Atf4	Atf4	ENSMUSP00000107641	11909	Atf2	Atf2	896
ENSMUSP00000023165	12914	Crebbp	Crebbp	ENSMUSP00000089708	20852	Stat6	Stat6	897
ENSMUSP00000021674	14281	Fos	Fos	ENSMUSP00000129001	18018	Nfatc1	Nfatc1	898
ENSMUSP00000023165	12914	Crebbp	Crebbp	ENSMUSP00000105234	11911	Atf4	Atf4	898
ENSMUSP00000092355	19698	Relb	Relb	ENSMUSP00000099928	19696	Rel	Rel	898
ENSMUSP00000027941	11910	Atf3	Atf3	ENSMUSP00000107641	11909	Atf2	Atf2	900
ENSMUSP00000028663	26427	Creb3l1	Creb3l1	ENSMUSP00000105234	11911	Atf4	Atf4	901
ENSMUSP00000059382	12400	Cbfb	Cbfb	ENSMUSP00000071035	17125	Smad1	Smad1	901
ENSMUSP00000059382	12400	Cbfb	Cbfb	ENSMUSP00000088678	69257	Elf2	Elf2	901
ENSMUSP00000100008	12913	Creb3	Creb3	ENSMUSP00000105234	11911	Atf4	Atf4	901
ENSMUSP00000022304	21834	Thrb	Thrb	ENSMUSP00000082971	17977	Ncoa1	Ncoa1	902
ENSMUSP00000071035	17125	Smad1	Smad1	ENSMUSP00000105502	17129	Smad5	Smad5	902
ENSMUSP00000128260	211586	Tfdp2	Tfdp2	ENSMUSP00000130115	17126	Smad2	Smad2	902
ENSMUSP00000066789	328572	Ep300	Ep300	ENSMUSP00000130115	17126	Smad2	Smad2	903
ENSMUSP00000127952	21781	Tfdp1	Tfdp1	ENSMUSP00000130115	17126	Smad2	Smad2	903
ENSMUSP00000004145	20850	Stat5a	Stat5a	ENSMUSP00000023165	12914	Crebbp	Crebbp	904
ENSMUSP00000004614	65020	Zfp110	Zfp110	ENSMUSP00000119114	170936	Zfp369	Zfp369	904
ENSMUSP00000025393	17128	Smad4	Smad4	ENSMUSP00000059382	12400	Cbfb	Cbfb	904
ENSMUSP00000034973	17127	Smad3	Smad3	ENSMUSP00000128260	211586	Tfdp2	Tfdp2	904
ENSMUSP00000046515	13709	Elf1	Elf1	ENSMUSP00000059382	12400	Cbfb	Cbfb	904
ENSMUSP00000066743	20846	Stat1	Stat1	ENSMUSP00000126531	23806	Arih1	Arih1	904
ENSMUSP00000127952	21781	Tfdp1	Tfdp1	ENSMUSP00000128260	211586	Tfdp2	Tfdp2	904
ENSMUSP00000025393	17128	Smad4	Smad4	ENSMUSP00000128260	211586	Tfdp2	Tfdp2	905
ENSMUSP00000034973	17127	Smad3	Smad3	ENSMUSP00000127952	21781	Tfdp1	Tfdp1	905
ENSMUSP00000036585	20182	Rxrb	Rxrb	ENSMUSP00000076491	20181	Rxra	Rxra	905
ENSMUSP00000059382	12400	Cbfb	Cbfb	ENSMUSP00000066789	328572	Ep300	Ep300	907
ENSMUSP00000015605	12915	Atf6b	Atf6b	ENSMUSP00000105234	11911	Atf4	Atf4	908
ENSMUSP00000023165	12914	Crebbp	Crebbp	ENSMUSP00000059382	12400	Cbfb	Cbfb	908
ENSMUSP00000099928	19696	Rel	Rel	ENSMUSP00000107512	18034	Nfkb2	Nfkb2	908
ENSMUSP00000006037	17978	Ncoa2	Ncoa2	ENSMUSP00000015987	20183	Rxrg	Rxrg	909
ENSMUSP00000025393	17128	Smad4	Smad4	ENSMUSP00000127952	21781	Tfdp1	Tfdp1	909
ENSMUSP00000041370	229542	Gatad2b	Gatad2b	ENSMUSP00000066789	328572	Ep300	Ep300	909
ENSMUSP00000079693	13170	Dbp	Dbp	ENSMUSP00000088031	353187	Nr1d2	Nr1d2	909
ENSMUSP00000050683	56484	Foxo3	Foxo3	ENSMUSP00000059420	54601	Foxo4	Foxo4	910
ENSMUSP00000027941	11910	Atf3	Atf3	ENSMUSP00000121233	12916	Crem	Crem	911
ENSMUSP00000050683	56484	Foxo3	Foxo3	ENSMUSP00000055308	56458	Foxo1	Foxo1	911
ENSMUSP00000021674	14281	Fos	Fos	ENSMUSP00000120152	20848	Stat3	Stat3	912
ENSMUSP00000006037	17978	Ncoa2	Ncoa2	ENSMUSP00000036585	20182	Rxrb	Rxrb	913
ENSMUSP00000050683	56484	Foxo3	Foxo3	ENSMUSP00000120152	20848	Stat3	Stat3	913
ENSMUSP00000055308	56458	Foxo1	Foxo1	ENSMUSP00000059420	54601	Foxo4	Foxo4	913
ENSMUSP00000055308	56458	Foxo1	Foxo1	ENSMUSP00000130115	17126	Smad2	Smad2	913
ENSMUSP00000082682	232875	Zscan18	Zscan18	ENSMUSP00000107512	18034	Nfkb2	Nfkb2	913
ENSMUSP00000015197	14461	Gata2	Gata2	ENSMUSP00000059382	12400	Cbfb	Cbfb	915
ENSMUSP00000023612	23872	Ets2	Ets2	ENSMUSP00000034534	23871	Ets1	Ets1	915
ENSMUSP00000034973	17127	Smad3	Smad3	ENSMUSP00000071035	17125	Smad1	Smad1	915
ENSMUSP00000066789	328572	Ep300	Ep300	ENSMUSP00000093959	23942	Mta2	Mta2	915
ENSMUSP00000104931	18021	Nfatc3	Nfatc3	ENSMUSP00000129001	18018	Nfatc1	Nfatc1	916
ENSMUSP00000127877	13559	E2f5	E2f5	ENSMUSP00000130115	17126	Smad2	Smad2	916
ENSMUSP00000023769	11908	Atf1	Atf1	ENSMUSP00000105234	11911	Atf4	Atf4	917
ENSMUSP00000023769	100040260	Atf1-ps	Atf1-ps	ENSMUSP00000105234	11911	Atf4	Atf4	917
ENSMUSP00000071035	17125	Smad1	Smad1	ENSMUSP00000130115	17126	Smad2	Smad2	917
ENSMUSP00000074198	18019	Nfatc2	Nfatc2	ENSMUSP00000104931	18021	Nfatc3	Nfatc3	918
ENSMUSP00000074198	18019	Nfatc2	Nfatc2	ENSMUSP00000129001	18018	Nfatc1	Nfatc1	918
ENSMUSP00000082971	17977	Ncoa1	Ncoa1	ENSMUSP00000106988	22259	Nr1h3	Nr1h3	918
ENSMUSP00000023165	12914	Crebbp	Crebbp	ENSMUSP00000130115	17126	Smad2	Smad2	919
ENSMUSP00000066789	328572	Ep300	Ep300	ENSMUSP00000069505	217166	Nr1d1	Nr1d1	919
ENSMUSP00000066789	328572	Ep300	Ep300	ENSMUSP00000069505	21833	Thra	Thra	919
ENSMUSP00000106401	29808	Mga	Mga	ENSMUSP00000127952	21781	Tfdp1	Tfdp1	919
ENSMUSP00000021062	13207	Ddx5	Ddx5	ENSMUSP00000082971	17977	Ncoa1	Ncoa1	920
ENSMUSP00000033939	16150	Ikbkb	Ikbkb	ENSMUSP00000050683	56484	Foxo3	Foxo3	920
ENSMUSP00000023165	12914	Crebbp	Crebbp	ENSMUSP00000034973	17127	Smad3	Smad3	922
ENSMUSP00000029445	16653	Kras	Kras	ENSMUSP00000029812	18033	Nfkb1	Nfkb1	922
ENSMUSP00000021062	13207	Ddx5	Ddx5	ENSMUSP00000066789	328572	Ep300	Ep300	923
ENSMUSP00000024179	73181	Nfatc4	Nfatc4	ENSMUSP00000104931	18021	Nfatc3	Nfatc3	923
ENSMUSP00000026999	17131	Smad7	Smad7	ENSMUSP00000036285	17130	Smad6	Smad6	923
ENSMUSP00000099434	13555	E2f1	E2f1	ENSMUSP00000100012	13557	E2f3	E2f3	923
ENSMUSP00000076491	20181	Rxra	Rxra	ENSMUSP00000135516	18514	Pbx1	Pbx1	924
ENSMUSP00000100872	20847	Stat2	Stat2	ENSMUSP00000102981	20851	Stat5b	Stat5b	925
ENSMUSP00000021674	14281	Fos	Fos	ENSMUSP00000140112	12912	Creb1	Creb1	926
ENSMUSP00000026571	54123	Irf7	Irf7	ENSMUSP00000066789	328572	Ep300	Ep300	926
ENSMUSP00000000450	19016	Pparg	Pparg	ENSMUSP00000023165	12914	Crebbp	Crebbp	927
ENSMUSP00000066789	328572	Ep300	Ep300	ENSMUSP00000135516	18514	Pbx1	Pbx1	927
ENSMUSP00000095199	14815	Nr3c1	Nr3c1	ENSMUSP00000105538	110784	Nr3c2	Nr3c2	927
ENSMUSP00000004145	20850	Stat5a	Stat5a	ENSMUSP00000100872	20847	Stat2	Stat2	928
ENSMUSP00000029812	18033	Nfkb1	Nfkb1	ENSMUSP00000082682	232875	Zscan18	Zscan18	928
ENSMUSP00000040694	19664	Rbpj	Rbpj	ENSMUSP00000140112	12912	Creb1	Creb1	928
ENSMUSP00000052648	11835	Ar	Ar	ENSMUSP00000095199	14815	Nr3c1	Nr3c1	928
ENSMUSP00000066743	20846	Stat1	Stat1	ENSMUSP00000066789	328572	Ep300	Ep300	928
ENSMUSP00000099434	13555	E2f1	E2f1	ENSMUSP00000127877	13559	E2f5	E2f5	928
ENSMUSP00000052648	11835	Ar	Ar	ENSMUSP00000105538	110784	Nr3c2	Nr3c2	929
ENSMUSP00000015987	20183	Rxrg	Rxrg	ENSMUSP00000036585	20182	Rxrb	Rxrb	932
ENSMUSP00000055308	56458	Foxo1	Foxo1	ENSMUSP00000120152	20848	Stat3	Stat3	932
ENSMUSP00000066743	20846	Stat1	Stat1	ENSMUSP00000089708	20852	Stat6	Stat6	932
ENSMUSP00000006037	17978	Ncoa2	Ncoa2	ENSMUSP00000095199	14815	Nr3c1	Nr3c1	933
ENSMUSP00000089708	20852	Stat6	Stat6	ENSMUSP00000120152	20848	Stat3	Stat3	933
ENSMUSP00000025393	17128	Smad4	Smad4	ENSMUSP00000127877	13559	E2f5	E2f5	934
ENSMUSP00000027941	11910	Atf3	Atf3	ENSMUSP00000054852	22433	Xbp1	Xbp1	934
ENSMUSP00000026571	54123	Irf7	Irf7	ENSMUSP00000100872	20847	Stat2	Stat2	936
ENSMUSP00000036285	17130	Smad6	Smad6	ENSMUSP00000071035	17125	Smad1	Smad1	936
ENSMUSP00000003284	54131	Irf3	Irf3	ENSMUSP00000026571	54123	Irf7	Irf7	937
ENSMUSP00000006037	17978	Ncoa2	Ncoa2	ENSMUSP00000082971	17977	Ncoa1	Ncoa1	937
ENSMUSP00000026999	17131	Smad7	Smad7	ENSMUSP00000071035	17125	Smad1	Smad1	937
ENSMUSP00000069744	19401	Rara	Rara	ENSMUSP00000135516	18514	Pbx1	Pbx1	937
ENSMUSP00000023165	12914	Crebbp	Crebbp	ENSMUSP00000067694	218772	Rarb	Rarb	938
ENSMUSP00000036285	17130	Smad6	Smad6	ENSMUSP00000105502	17129	Smad5	Smad5	938
ENSMUSP00000026999	17131	Smad7	Smad7	ENSMUSP00000105502	17129	Smad5	Smad5	939
ENSMUSP00000034973	17127	Smad3	Smad3	ENSMUSP00000127877	13559	E2f5	E2f5	940
ENSMUSP00000006037	17978	Ncoa2	Ncoa2	ENSMUSP00000105049	19013	Ppara	Ppara	942
ENSMUSP00000015987	20183	Rxrg	Rxrg	ENSMUSP00000076491	20181	Rxra	Rxra	942
ENSMUSP00000034973	17127	Smad3	Smad3	ENSMUSP00000066789	328572	Ep300	Ep300	942
ENSMUSP00000000450	19016	Pparg	Pparg	ENSMUSP00000015987	20183	Rxrg	Rxrg	943
ENSMUSP00000026999	17131	Smad7	Smad7	ENSMUSP00000130115	17126	Smad2	Smad2	943
ENSMUSP00000029812	18033	Nfkb1	Nfkb1	ENSMUSP00000066789	328572	Ep300	Ep300	943
ENSMUSP00000034973	17127	Smad3	Smad3	ENSMUSP00000055308	56458	Foxo1	Foxo1	943
ENSMUSP00000000450	19016	Pparg	Pparg	ENSMUSP00000036585	20182	Rxrb	Rxrb	944
ENSMUSP00000066789	328572	Ep300	Ep300	ENSMUSP00000072617	15499	Hsf1	Hsf1	944
ENSMUSP00000107641	11909	Atf2	Atf2	ENSMUSP00000140112	12912	Creb1	Creb1	945
ENSMUSP00000023165	12914	Crebbp	Crebbp	ENSMUSP00000040694	19664	Rbpj	Rbpj	946
ENSMUSP00000038532	231991	Creb5	Creb5	ENSMUSP00000107641	11909	Atf2	Atf2	946
ENSMUSP00000066743	20846	Stat1	Stat1	ENSMUSP00000102981	20851	Stat5b	Stat5b	946
ENSMUSP00000023165	12914	Crebbp	Crebbp	ENSMUSP00000029812	18033	Nfkb1	Nfkb1	947
ENSMUSP00000023165	12914	Crebbp	Crebbp	ENSMUSP00000069744	19401	Rara	Rara	947
ENSMUSP00000023165	12914	Crebbp	Crebbp	ENSMUSP00000026571	54123	Irf7	Irf7	947
ENSMUSP00000102981	20851	Stat5b	Stat5b	ENSMUSP00000120152	20848	Stat3	Stat3	948
ENSMUSP00000023165	12914	Crebbp	Crebbp	ENSMUSP00000072617	15499	Hsf1	Hsf1	949
ENSMUSP00000024179	73181	Nfatc4	Nfatc4	ENSMUSP00000066927	14463	Gata4	Gata4	949
ENSMUSP00000033939	16150	Ikbkb	Ikbkb	ENSMUSP00000034359	71609	Tradd	Tradd	949
ENSMUSP00000022304	21834	Thrb	Thrb	ENSMUSP00000036585	20182	Rxrb	Rxrb	950
ENSMUSP00000021674	14281	Fos	Fos	ENSMUSP00000066789	328572	Ep300	Ep300	951
ENSMUSP00000023165	12914	Crebbp	Crebbp	ENSMUSP00000105049	19013	Ppara	Ppara	951
ENSMUSP00000050683	56484	Foxo3	Foxo3	ENSMUSP00000066789	328572	Ep300	Ep300	951
ENSMUSP00000003284	54131	Irf3	Irf3	ENSMUSP00000126531	23806	Arih1	Arih1	952
ENSMUSP00000023769	11908	Atf1	Atf1	ENSMUSP00000121233	12916	Crem	Crem	952
ENSMUSP00000023769	100040260	Atf1-ps	Atf1-ps	ENSMUSP00000121233	12916	Crem	Crem	952
ENSMUSP00000026217	12675	Chuk	Chuk	ENSMUSP00000034359	71609	Tradd	Tradd	952
ENSMUSP00000026571	54123	Irf7	Irf7	ENSMUSP00000066743	20846	Stat1	Stat1	952
ENSMUSP00000029812	18033	Nfkb1	Nfkb1	ENSMUSP00000107512	18034	Nfkb2	Nfkb2	954
ENSMUSP00000069744	19401	Rara	Rara	ENSMUSP00000082971	17977	Ncoa1	Ncoa1	955
ENSMUSP00000004145	20850	Stat5a	Stat5a	ENSMUSP00000102981	20851	Stat5b	Stat5b	956
ENSMUSP00000004145	20850	Stat5a	Stat5a	ENSMUSP00000120152	20848	Stat3	Stat3	957
ENSMUSP00000004145	20850	Stat5a	Stat5a	ENSMUSP00000066743	20846	Stat1	Stat1	957
ENSMUSP00000026217	12675	Chuk	Chuk	ENSMUSP00000026571	54123	Irf7	Irf7	960
ENSMUSP00000100872	20847	Stat2	Stat2	ENSMUSP00000120152	20848	Stat3	Stat3	961
ENSMUSP00000002320	19015	Ppard	Ppard	ENSMUSP00000076491	20181	Rxra	Rxra	962
ENSMUSP00000003640	14282	Fosb	Fosb	ENSMUSP00000092901	16478	Jund	Jund	962
ENSMUSP00000023165	12914	Crebbp	Crebbp	ENSMUSP00000066743	20846	Stat1	Stat1	962
ENSMUSP00000000450	19016	Pparg	Pparg	ENSMUSP00000006037	17978	Ncoa2	Ncoa2	963
ENSMUSP00000000450	19016	Pparg	Pparg	ENSMUSP00000082971	17977	Ncoa1	Ncoa1	964
ENSMUSP00000015987	20183	Rxrg	Rxrg	ENSMUSP00000069744	19401	Rara	Rara	964
ENSMUSP00000027941	11910	Atf3	Atf3	ENSMUSP00000140112	12912	Creb1	Creb1	964
ENSMUSP00000027974	226641	Atf6	Atf6	ENSMUSP00000105234	11911	Atf4	Atf4	965
ENSMUSP00000066789	328572	Ep300	Ep300	ENSMUSP00000107641	11909	Atf2	Atf2	965
ENSMUSP00000076491	20181	Rxra	Rxra	ENSMUSP00000106988	22259	Nr1h3	Nr1h3	965
ENSMUSP00000040694	19664	Rbpj	Rbpj	ENSMUSP00000066789	328572	Ep300	Ep300	966
ENSMUSP00000105234	11911	Atf4	Atf4	ENSMUSP00000140112	12912	Creb1	Creb1	966
ENSMUSP00000015987	20183	Rxrg	Rxrg	ENSMUSP00000067694	218772	Rarb	Rarb	967
ENSMUSP00000026999	17131	Smad7	Smad7	ENSMUSP00000034973	17127	Smad3	Smad3	967
ENSMUSP00000066743	20846	Stat1	Stat1	ENSMUSP00000120152	20848	Stat3	Stat3	967
ENSMUSP00000018407	21388	Tbx5	Tbx5	ENSMUSP00000066927	14463	Gata4	Gata4	968
ENSMUSP00000026217	12675	Chuk	Chuk	ENSMUSP00000092355	19698	Relb	Relb	969
ENSMUSP00000036585	20182	Rxrb	Rxrb	ENSMUSP00000067694	218772	Rarb	Rarb	969
ENSMUSP00000076491	20181	Rxra	Rxra	ENSMUSP00000105049	19013	Ppara	Ppara	969
ENSMUSP00000015987	20183	Rxrg	Rxrg	ENSMUSP00000022304	21834	Thrb	Thrb	970
ENSMUSP00000003284	54131	Irf3	Irf3	ENSMUSP00000066789	328572	Ep300	Ep300	971
ENSMUSP00000025393	17128	Smad4	Smad4	ENSMUSP00000105502	17129	Smad5	Smad5	971
ENSMUSP00000026217	12675	Chuk	Chuk	ENSMUSP00000099928	19696	Rel	Rel	971
ENSMUSP00000066789	328572	Ep300	Ep300	ENSMUSP00000067694	218772	Rarb	Rarb	971
ENSMUSP00000003640	14282	Fosb	Fosb	ENSMUSP00000021674	14281	Fos	Fos	972
ENSMUSP00000033939	16150	Ikbkb	Ikbkb	ENSMUSP00000099928	19696	Rel	Rel	972
ENSMUSP00000066789	328572	Ep300	Ep300	ENSMUSP00000069744	19401	Rara	Rara	972
ENSMUSP00000050683	56484	Foxo3	Foxo3	ENSMUSP00000130115	17126	Smad2	Smad2	973
ENSMUSP00000006037	17978	Ncoa2	Ncoa2	ENSMUSP00000066789	328572	Ep300	Ep300	974
ENSMUSP00000066789	328572	Ep300	Ep300	ENSMUSP00000076491	20181	Rxra	Rxra	974
ENSMUSP00000027906	26381	Esrrg	Esrrg	ENSMUSP00000082971	17977	Ncoa1	Ncoa1	976
ENSMUSP00000034973	17127	Smad3	Smad3	ENSMUSP00000050683	56484	Foxo3	Foxo3	976
ENSMUSP00000067694	218772	Rarb	Rarb	ENSMUSP00000082971	17977	Ncoa1	Ncoa1	976
ENSMUSP00000023165	12914	Crebbp	Crebbp	ENSMUSP00000050683	56484	Foxo3	Foxo3	977
ENSMUSP00000023769	11908	Atf1	Atf1	ENSMUSP00000140112	12912	Creb1	Creb1	977
ENSMUSP00000023769	100040260	Atf1-ps	Atf1-ps	ENSMUSP00000140112	12912	Creb1	Creb1	977
ENSMUSP00000021674	14281	Fos	Fos	ENSMUSP00000107641	11909	Atf2	Atf2	979
ENSMUSP00000025393	17128	Smad4	Smad4	ENSMUSP00000050683	56484	Foxo3	Foxo3	979
ENSMUSP00000066743	20846	Stat1	Stat1	ENSMUSP00000100872	20847	Stat2	Stat2	979
ENSMUSP00000020908	50496	E2f6	E2f6	ENSMUSP00000106401	29808	Mga	Mga	980
ENSMUSP00000020908	50496	E2f6	E2f6	ENSMUSP00000128260	211586	Tfdp2	Tfdp2	981
ENSMUSP00000033939	16150	Ikbkb	Ikbkb	ENSMUSP00000107512	18034	Nfkb2	Nfkb2	981
ENSMUSP00000067694	218772	Rarb	Rarb	ENSMUSP00000069744	19401	Rara	Rara	981
ENSMUSP00000006037	17978	Ncoa2	Ncoa2	ENSMUSP00000023165	12914	Crebbp	Crebbp	982
ENSMUSP00000027974	226641	Atf6	Atf6	ENSMUSP00000054852	22433	Xbp1	Xbp1	982
ENSMUSP00000036585	20182	Rxrb	Rxrb	ENSMUSP00000069744	19401	Rara	Rara	982
ENSMUSP00000100012	13557	E2f3	E2f3	ENSMUSP00000128260	211586	Tfdp2	Tfdp2	982
ENSMUSP00000023165	12914	Crebbp	Crebbp	ENSMUSP00000066789	328572	Ep300	Ep300	983
ENSMUSP00000023165	12914	Crebbp	Crebbp	ENSMUSP00000076491	20181	Rxra	Rxra	983
ENSMUSP00000026217	12675	Chuk	Chuk	ENSMUSP00000107512	18034	Nfkb2	Nfkb2	984
ENSMUSP00000021674	14281	Fos	Fos	ENSMUSP00000092901	16478	Jund	Jund	985
ENSMUSP00000068931	116871	Mta3	Mta3	ENSMUSP00000093959	23942	Mta2	Mta2	985
ENSMUSP00000100012	13557	E2f3	E2f3	ENSMUSP00000127952	21781	Tfdp1	Tfdp1	985
ENSMUSP00000025393	17128	Smad4	Smad4	ENSMUSP00000071035	17125	Smad1	Smad1	986
ENSMUSP00000026217	12675	Chuk	Chuk	ENSMUSP00000029812	18033	Nfkb1	Nfkb1	986
ENSMUSP00000026217	12675	Chuk	Chuk	ENSMUSP00000033939	16150	Ikbkb	Ikbkb	986
ENSMUSP00000041370	229542	Gatad2b	Gatad2b	ENSMUSP00000093959	23942	Mta2	Mta2	986
ENSMUSP00000027941	11910	Atf3	Atf3	ENSMUSP00000105234	11911	Atf4	Atf4	987
ENSMUSP00000029812	18033	Nfkb1	Nfkb1	ENSMUSP00000099928	19696	Rel	Rel	987
ENSMUSP00000054852	22433	Xbp1	Xbp1	ENSMUSP00000105234	11911	Atf4	Atf4	987
ENSMUSP00000082971	17977	Ncoa1	Ncoa1	ENSMUSP00000105049	19013	Ppara	Ppara	987
ENSMUSP00000099434	13555	E2f1	E2f1	ENSMUSP00000128260	211586	Tfdp2	Tfdp2	987
ENSMUSP00000006037	17978	Ncoa2	Ncoa2	ENSMUSP00000076491	20181	Rxra	Rxra	988
ENSMUSP00000020908	50496	E2f6	E2f6	ENSMUSP00000127952	21781	Tfdp1	Tfdp1	988
ENSMUSP00000076491	20181	Rxra	Rxra	ENSMUSP00000082971	17977	Ncoa1	Ncoa1	988
ENSMUSP00000022304	21834	Thrb	Thrb	ENSMUSP00000076491	20181	Rxra	Rxra	989
ENSMUSP00000034973	17127	Smad3	Smad3	ENSMUSP00000130115	17126	Smad2	Smad2	989
ENSMUSP00000041370	229542	Gatad2b	Gatad2b	ENSMUSP00000068931	116871	Mta3	Mta3	989
ENSMUSP00000099434	13555	E2f1	E2f1	ENSMUSP00000127952	21781	Tfdp1	Tfdp1	989
ENSMUSP00000000450	19016	Pparg	Pparg	ENSMUSP00000076491	20181	Rxra	Rxra	991
ENSMUSP00000029812	18033	Nfkb1	Nfkb1	ENSMUSP00000033939	16150	Ikbkb	Ikbkb	992
ENSMUSP00000127877	13559	E2f5	E2f5	ENSMUSP00000127952	21781	Tfdp1	Tfdp1	993
ENSMUSP00000003284	54131	Irf3	Irf3	ENSMUSP00000023165	12914	Crebbp	Crebbp	994
ENSMUSP00000066789	328572	Ep300	Ep300	ENSMUSP00000082971	17977	Ncoa1	Ncoa1	994
ENSMUSP00000025393	17128	Smad4	Smad4	ENSMUSP00000034973	17127	Smad3	Smad3	995
ENSMUSP00000025393	17128	Smad4	Smad4	ENSMUSP00000130115	17126	Smad2	Smad2	995
ENSMUSP00000069744	19401	Rara	Rara	ENSMUSP00000076491	20181	Rxra	Rxra	995
ENSMUSP00000127877	13559	E2f5	E2f5	ENSMUSP00000128260	211586	Tfdp2	Tfdp2	995
ENSMUSP00000029812	18033	Nfkb1	Nfkb1	ENSMUSP00000092355	19698	Relb	Relb	996
ENSMUSP00000066789	328572	Ep300	Ep300	ENSMUSP00000140112	12912	Creb1	Creb1	996
ENSMUSP00000066743	20846	Stat1	Stat1	ENSMUSP00000120525	16391	Irf9	Irf9	997
ENSMUSP00000067694	218772	Rarb	Rarb	ENSMUSP00000076491	20181	Rxra	Rxra	997
ENSMUSP00000006037	17978	Ncoa2	Ncoa2	ENSMUSP00000052648	11835	Ar	Ar	999
ENSMUSP00000023165	12914	Crebbp	Crebbp	ENSMUSP00000082971	17977	Ncoa1	Ncoa1	999
ENSMUSP00000023165	12914	Crebbp	Crebbp	ENSMUSP00000140112	12912	Creb1	Creb1	999
ENSMUSP00000092355	19698	Relb	Relb	ENSMUSP00000107512	18034	Nfkb2	Nfkb2	999
ENSMUSP00000100872	20847	Stat2	Stat2	ENSMUSP00000120525	16391	Irf9	Irf9	999

## Sheet: HypoTH + T3 vs HypoTH
Protein_id1	Gene_id1	Official_Symbol	Description	Protein_id2	Gene_id2	Official_Symbol	Description	PPI_score
ENSMUSP00000023769	100040260	Atf1-ps	Atf1-ps	ENSMUSP00000028663	26427	Creb3l1	Creb3l1	812
ENSMUSP00000023769	100040260	Atf1-ps	Atf1-ps	ENSMUSP00000040208	208647	Creb3l2	Creb3l2	858
ENSMUSP00000023769	100040260	Atf1-ps	Atf1-ps	ENSMUSP00000107641	11909	Atf2	Atf2	872
ENSMUSP00000015605	12915	Atf6b	Atf6b	ENSMUSP00000028663	26427	Creb3l1	Creb3l1	848
ENSMUSP00000015605	12915	Atf6b	Atf6b	ENSMUSP00000040208	208647	Creb3l2	Creb3l2	849
ENSMUSP00000015605	12915	Atf6b	Atf6b	ENSMUSP00000023769	100040260	Atf1-ps	Atf1-ps	815
ENSMUSP00000015605	12915	Atf6b	Atf6b	ENSMUSP00000027974	226641	Atf6	Atf6	847
ENSMUSP00000015605	12915	Atf6b	Atf6b	ENSMUSP00000107641	11909	Atf2	Atf2	807
ENSMUSP00000104456	223922	Atf7	Atf7	ENSMUSP00000107641	11909	Atf2	Atf2	831
ENSMUSP00000096129	12606	Cebpa	Cebpa	ENSMUSP00000099434	13555	E2f1	E2f1	789
ENSMUSP00000069850	12608	Cebpb	Cebpb	ENSMUSP00000096129	12606	Cebpa	Cebpa	906
ENSMUSP00000028663	26427	Creb3l1	Creb3l1	ENSMUSP00000040208	208647	Creb3l2	Creb3l2	852
ENSMUSP00000028663	26427	Creb3l1	Creb3l1	ENSMUSP00000107641	11909	Atf2	Atf2	824
ENSMUSP00000040208	208647	Creb3l2	Creb3l2	ENSMUSP00000047771	107503	Atf5	Atf5	754
ENSMUSP00000040208	208647	Creb3l2	Creb3l2	ENSMUSP00000107641	11909	Atf2	Atf2	829
ENSMUSP00000099434	13555	E2f1	E2f1	ENSMUSP00000128260	211586	Tfdp2	Tfdp2	987
ENSMUSP00000020908	50496	E2f6	E2f6	ENSMUSP00000128260	211586	Tfdp2	Tfdp2	981
ENSMUSP00000021674	14281	Fos	Fos	ENSMUSP00000104456	223922	Atf7	Atf7	769
ENSMUSP00000021674	14281	Fos	Fos	ENSMUSP00000095199	14815	Nr3c1	Nr3c1	828
ENSMUSP00000021674	14281	Fos	Fos	ENSMUSP00000069850	12608	Cebpb	Cebpb	726
ENSMUSP00000021674	14281	Fos	Fos	ENSMUSP00000120152	20848	Stat3	Stat3	912
ENSMUSP00000021674	14281	Fos	Fos	ENSMUSP00000129001	18018	Nfatc1	Nfatc1	898
ENSMUSP00000021674	14281	Fos	Fos	ENSMUSP00000107641	11909	Atf2	Atf2	979
ENSMUSP00000021674	14281	Fos	Fos	ENSMUSP00000066743	20846	Stat1	Stat1	741
ENSMUSP00000003640	14282	Fosb	Fosb	ENSMUSP00000021674	14281	Fos	Fos	972
ENSMUSP00000055308	56458	Foxo1	Foxo1	ENSMUSP00000059420	54601	Foxo4	Foxo4	913
ENSMUSP00000055308	56458	Foxo1	Foxo1	ENSMUSP00000096129	12606	Cebpa	Cebpa	843
ENSMUSP00000055308	56458	Foxo1	Foxo1	ENSMUSP00000095199	14815	Nr3c1	Nr3c1	728
ENSMUSP00000055308	56458	Foxo1	Foxo1	ENSMUSP00000120152	20848	Stat3	Stat3	932
ENSMUSP00000050683	56484	Foxo3	Foxo3	ENSMUSP00000059420	54601	Foxo4	Foxo4	910
ENSMUSP00000050683	56484	Foxo3	Foxo3	ENSMUSP00000120152	20848	Stat3	Stat3	913
ENSMUSP00000050683	56484	Foxo3	Foxo3	ENSMUSP00000055308	56458	Foxo1	Foxo1	911
ENSMUSP00000050683	56484	Foxo3	Foxo3	ENSMUSP00000072617	15499	Hsf1	Hsf1	740
ENSMUSP00000059420	54601	Foxo4	Foxo4	ENSMUSP00000120152	20848	Stat3	Stat3	850
ENSMUSP00000099716	329934	Foxo6	Foxo6	ENSMUSP00000120152	20848	Stat3	Stat3	814
ENSMUSP00000066927	14463	Gata4	Gata4	ENSMUSP00000080538	140781	Myh7	Myh7	754
ENSMUSP00000066927	14463	Gata4	Gata4	ENSMUSP00000129001	18018	Nfatc1	Nfatc1	865
ENSMUSP00000066927	14463	Gata4	Gata4	ENSMUSP00000104931	18021	Nfatc3	Nfatc3	889
ENSMUSP00000041774	14465	Gata6	Gata6	ENSMUSP00000052591	57246	Tbx20	Tbx20	722
ENSMUSP00000026571	54123	Irf7	Irf7	ENSMUSP00000100872	20847	Stat2	Stat2	936
ENSMUSP00000026571	54123	Irf7	Irf7	ENSMUSP00000120525	16391	Irf9	Irf9	839
ENSMUSP00000026571	54123	Irf7	Irf7	ENSMUSP00000066743	20846	Stat1	Stat1	952
ENSMUSP00000080538	140781	Myh7	Myh7	ENSMUSP00000099867	68966	Ngdn	Ngdn	953
ENSMUSP00000104931	18021	Nfatc3	Nfatc3	ENSMUSP00000129001	18018	Nfatc1	Nfatc1	916
ENSMUSP00000065363	18030	Nfil3	Nfil3	ENSMUSP00000069505	217166	Nr1d1	Nr1d1	701
ENSMUSP00000065363	18030	Nfil3	Nfil3	ENSMUSP00000069505	21833	Thra	Thra	701
ENSMUSP00000029812	18033	Nfkb1	Nfkb1	ENSMUSP00000050683	56484	Foxo3	Foxo3	723
ENSMUSP00000069505	217166	Nr1d1	Nr1d1	ENSMUSP00000079693	13170	Dbp	Dbp	851
ENSMUSP00000002320	19015	Ppard	Ppard	ENSMUSP00000036585	20182	Rxrb	Rxrb	852
ENSMUSP00000000450	19016	Pparg	Pparg	ENSMUSP00000089708	20852	Stat6	Stat6	723
ENSMUSP00000000450	19016	Pparg	Pparg	ENSMUSP00000055308	56458	Foxo1	Foxo1	798
ENSMUSP00000000450	19016	Pparg	Pparg	ENSMUSP00000069850	12608	Cebpb	Cebpb	810
ENSMUSP00000000450	19016	Pparg	Pparg	ENSMUSP00000036585	20182	Rxrb	Rxrb	944
ENSMUSP00000000450	19016	Pparg	Pparg	ENSMUSP00000105211	19018	Scand1	Scand1	753
ENSMUSP00000000450	19016	Pparg	Pparg	ENSMUSP00000096129	12606	Cebpa	Cebpa	851
ENSMUSP00000069744	19401	Rara	Rara	ENSMUSP00000135516	18514	Pbx1	Pbx1	937
ENSMUSP00000067694	218772	Rarb	Rarb	ENSMUSP00000069744	19401	Rara	Rara	981
ENSMUSP00000040694	19664	Rbpj	Rbpj	ENSMUSP00000129001	18018	Nfatc1	Nfatc1	749
ENSMUSP00000029795	19885	Rorc	Rorc	ENSMUSP00000120152	20848	Stat3	Stat3	812
ENSMUSP00000006761	12395	Runx1t1	Runx1t1	ENSMUSP00000096129	12606	Cebpa	Cebpa	867
ENSMUSP00000036585	20182	Rxrb	Rxrb	ENSMUSP00000069744	19401	Rara	Rara	982
ENSMUSP00000036585	20182	Rxrb	Rxrb	ENSMUSP00000067694	218772	Rarb	Rarb	969
ENSMUSP00000036585	20182	Rxrb	Rxrb	ENSMUSP00000105049	19013	Ppara	Ppara	851
ENSMUSP00000002180	20375	Spi1	Spi1	ENSMUSP00000109477	13876	Erg	Erg	703
ENSMUSP00000002180	20375	Spi1	Spi1	ENSMUSP00000069744	19401	Rara	Rara	891
ENSMUSP00000002180	20375	Spi1	Spi1	ENSMUSP00000096129	12606	Cebpa	Cebpa	797
ENSMUSP00000002180	20375	Spi1	Spi1	ENSMUSP00000118997	12398	Cbfa2t3	Cbfa2t3	703
ENSMUSP00000002180	20375	Spi1	Spi1	ENSMUSP00000069850	12608	Cebpb	Cebpb	700
ENSMUSP00000002180	20375	Spi1	Spi1	ENSMUSP00000120152	20848	Stat3	Stat3	736
ENSMUSP00000002180	20375	Spi1	Spi1	ENSMUSP00000129001	18018	Nfatc1	Nfatc1	709
ENSMUSP00000002180	20375	Spi1	Spi1	ENSMUSP00000006761	12395	Runx1t1	Runx1t1	836
ENSMUSP00000066743	20846	Stat1	Stat1	ENSMUSP00000120525	16391	Irf9	Irf9	997
ENSMUSP00000066743	20846	Stat1	Stat1	ENSMUSP00000102981	20851	Stat5b	Stat5b	946
ENSMUSP00000066743	20846	Stat1	Stat1	ENSMUSP00000120152	20848	Stat3	Stat3	967
ENSMUSP00000066743	20846	Stat1	Stat1	ENSMUSP00000100872	20847	Stat2	Stat2	979
ENSMUSP00000066743	20846	Stat1	Stat1	ENSMUSP00000089708	20852	Stat6	Stat6	932
ENSMUSP00000100872	20847	Stat2	Stat2	ENSMUSP00000120525	16391	Irf9	Irf9	999
ENSMUSP00000100872	20847	Stat2	Stat2	ENSMUSP00000102981	20851	Stat5b	Stat5b	925
ENSMUSP00000100872	20847	Stat2	Stat2	ENSMUSP00000120152	20848	Stat3	Stat3	961
ENSMUSP00000120152	20848	Stat3	Stat3	ENSMUSP00000120525	16391	Irf9	Irf9	849
ENSMUSP00000004145	20850	Stat5a	Stat5a	ENSMUSP00000120525	16391	Irf9	Irf9	787
ENSMUSP00000004145	20850	Stat5a	Stat5a	ENSMUSP00000102981	20851	Stat5b	Stat5b	956
ENSMUSP00000004145	20850	Stat5a	Stat5a	ENSMUSP00000120152	20848	Stat3	Stat3	957
ENSMUSP00000004145	20850	Stat5a	Stat5a	ENSMUSP00000100872	20847	Stat2	Stat2	928
ENSMUSP00000004145	20850	Stat5a	Stat5a	ENSMUSP00000089708	20852	Stat6	Stat6	835
ENSMUSP00000004145	20850	Stat5a	Stat5a	ENSMUSP00000066743	20846	Stat1	Stat1	957
ENSMUSP00000102981	20851	Stat5b	Stat5b	ENSMUSP00000120525	16391	Irf9	Irf9	737
ENSMUSP00000102981	20851	Stat5b	Stat5b	ENSMUSP00000120152	20848	Stat3	Stat3	948
ENSMUSP00000089708	20852	Stat6	Stat6	ENSMUSP00000120525	16391	Irf9	Irf9	790
ENSMUSP00000089708	20852	Stat6	Stat6	ENSMUSP00000102981	20851	Stat5b	Stat5b	825
ENSMUSP00000089708	20852	Stat6	Stat6	ENSMUSP00000120152	20848	Stat3	Stat3	933
ENSMUSP00000089708	20852	Stat6	Stat6	ENSMUSP00000100872	20847	Stat2	Stat2	884
ENSMUSP00000052591	57246	Tbx20	Tbx20	ENSMUSP00000066927	14463	Gata4	Gata4	878
ENSMUSP00000018407	21388	Tbx5	Tbx5	ENSMUSP00000080538	140781	Myh7	Myh7	737
ENSMUSP00000018407	21388	Tbx5	Tbx5	ENSMUSP00000066927	14463	Gata4	Gata4	968
ENSMUSP00000018407	21388	Tbx5	Tbx5	ENSMUSP00000041774	14465	Gata6	Gata6	711
ENSMUSP00000069505	21833	Thra	Thra	ENSMUSP00000079693	13170	Dbp	Dbp	851
ENSMUSP00000022304	21834	Thrb	Thrb	ENSMUSP00000036585	20182	Rxrb	Rxrb	950
ENSMUSP00000064637	59057	Zfp24	Zfp24	ENSMUSP00000105211	19018	Scand1	Scand1	733
ENSMUSP00000057253	69256	Zfp397	Zfp397	ENSMUSP00000064637	59057	Zfp24	Zfp24	707

## Sheet: HyperTH vs HypoTH
Protein_id1	Gene_id1	Official_Symbol	Description	Protein_id2	Gene_id2	Official_Symbol	Description	PPI_score
ENSMUSP00000000450	19016	Pparg	Pparg	ENSMUSP00000140112	12912	Creb1	Creb1	744
ENSMUSP00000000450	19016	Pparg	Pparg	ENSMUSP00000015987	20183	Rxrg	Rxrg	943
ENSMUSP00000000450	19016	Pparg	Pparg	ENSMUSP00000089708	20852	Stat6	Stat6	723
ENSMUSP00000000450	19016	Pparg	Pparg	ENSMUSP00000055308	56458	Foxo1	Foxo1	798
ENSMUSP00000000450	19016	Pparg	Pparg	ENSMUSP00000076491	20181	Rxra	Rxra	991
ENSMUSP00000000450	19016	Pparg	Pparg	ENSMUSP00000006037	17978	Ncoa2	Ncoa2	963
ENSMUSP00000000450	19016	Pparg	Pparg	ENSMUSP00000036585	20182	Rxrb	Rxrb	944
ENSMUSP00000000450	19016	Pparg	Pparg	ENSMUSP00000105211	19018	Scand1	Scand1	753
ENSMUSP00000000450	19016	Pparg	Pparg	ENSMUSP00000066789	328572	Ep300	Ep300	834
ENSMUSP00000000450	19016	Pparg	Pparg	ENSMUSP00000096129	12606	Cebpa	Cebpa	851
ENSMUSP00000000450	19016	Pparg	Pparg	ENSMUSP00000082971	17977	Ncoa1	Ncoa1	964
ENSMUSP00000000450	19016	Pparg	Pparg	ENSMUSP00000023165	12914	Crebbp	Crebbp	927
ENSMUSP00000002180	20375	Spi1	Spi1	ENSMUSP00000015197	14461	Gata2	Gata2	866
ENSMUSP00000002180	20375	Spi1	Spi1	ENSMUSP00000023165	12914	Crebbp	Crebbp	752
ENSMUSP00000002180	20375	Spi1	Spi1	ENSMUSP00000109477	13876	Erg	Erg	703
ENSMUSP00000002180	20375	Spi1	Spi1	ENSMUSP00000069744	19401	Rara	Rara	891
ENSMUSP00000002180	20375	Spi1	Spi1	ENSMUSP00000096129	12606	Cebpa	Cebpa	797
ENSMUSP00000002180	20375	Spi1	Spi1	ENSMUSP00000118997	12398	Cbfa2t3	Cbfa2t3	703
ENSMUSP00000002180	20375	Spi1	Spi1	ENSMUSP00000066789	328572	Ep300	Ep300	711
ENSMUSP00000002180	20375	Spi1	Spi1	ENSMUSP00000120152	20848	Stat3	Stat3	736
ENSMUSP00000002180	20375	Spi1	Spi1	ENSMUSP00000129001	18018	Nfatc1	Nfatc1	709
ENSMUSP00000002180	20375	Spi1	Spi1	ENSMUSP00000040245	15900	Irf8	Irf8	936
ENSMUSP00000002180	20375	Spi1	Spi1	ENSMUSP00000006761	12395	Runx1t1	Runx1t1	836
ENSMUSP00000002320	19015	Ppard	Ppard	ENSMUSP00000082971	17977	Ncoa1	Ncoa1	765
ENSMUSP00000002320	19015	Ppard	Ppard	ENSMUSP00000036585	20182	Rxrb	Rxrb	852
ENSMUSP00000002320	19015	Ppard	Ppard	ENSMUSP00000076491	20181	Rxra	Rxra	962
ENSMUSP00000002320	19015	Ppard	Ppard	ENSMUSP00000015987	20183	Rxrg	Rxrg	875
ENSMUSP00000003284	54131	Irf3	Irf3	ENSMUSP00000023165	12914	Crebbp	Crebbp	994
ENSMUSP00000003284	54131	Irf3	Irf3	ENSMUSP00000100872	20847	Stat2	Stat2	827
ENSMUSP00000003284	54131	Irf3	Irf3	ENSMUSP00000026571	54123	Irf7	Irf7	937
ENSMUSP00000003284	54131	Irf3	Irf3	ENSMUSP00000066789	328572	Ep300	Ep300	971
ENSMUSP00000003284	54131	Irf3	Irf3	ENSMUSP00000066743	20846	Stat1	Stat1	820
ENSMUSP00000003640	14282	Fosb	Fosb	ENSMUSP00000021674	14281	Fos	Fos	972
ENSMUSP00000003640	14282	Fosb	Fosb	ENSMUSP00000023779	15370	Nr4a1	Nr4a1	765
ENSMUSP00000003640	14282	Fosb	Fosb	ENSMUSP00000092901	16478	Jund	Jund	962
ENSMUSP00000004145	20850	Stat5a	Stat5a	ENSMUSP00000023165	12914	Crebbp	Crebbp	904
ENSMUSP00000004145	20850	Stat5a	Stat5a	ENSMUSP00000066789	328572	Ep300	Ep300	804
ENSMUSP00000004145	20850	Stat5a	Stat5a	ENSMUSP00000104298	22059	Trp53	Trp53	781
ENSMUSP00000004145	20850	Stat5a	Stat5a	ENSMUSP00000120525	16391	Irf9	Irf9	787
ENSMUSP00000004145	20850	Stat5a	Stat5a	ENSMUSP00000102981	20851	Stat5b	Stat5b	956
ENSMUSP00000004145	20850	Stat5a	Stat5a	ENSMUSP00000120152	20848	Stat3	Stat3	957
ENSMUSP00000004145	20850	Stat5a	Stat5a	ENSMUSP00000100872	20847	Stat2	Stat2	928
ENSMUSP00000004145	20850	Stat5a	Stat5a	ENSMUSP00000089708	20852	Stat6	Stat6	835
ENSMUSP00000004145	20850	Stat5a	Stat5a	ENSMUSP00000066743	20846	Stat1	Stat1	957
ENSMUSP00000004145	20850	Stat5a	Stat5a	ENSMUSP00000040245	15900	Irf8	Irf8	777
ENSMUSP00000004614	65020	Zfp110	Zfp110	ENSMUSP00000119114	170936	Zfp369	Zfp369	904
ENSMUSP00000006037	17978	Ncoa2	Ncoa2	ENSMUSP00000023165	12914	Crebbp	Crebbp	982
ENSMUSP00000006037	17978	Ncoa2	Ncoa2	ENSMUSP00000082971	17977	Ncoa1	Ncoa1	937
ENSMUSP00000006037	17978	Ncoa2	Ncoa2	ENSMUSP00000022304	21834	Thrb	Thrb	705
ENSMUSP00000006037	17978	Ncoa2	Ncoa2	ENSMUSP00000076491	20181	Rxra	Rxra	988
ENSMUSP00000006037	17978	Ncoa2	Ncoa2	ENSMUSP00000066789	328572	Ep300	Ep300	974
ENSMUSP00000006037	17978	Ncoa2	Ncoa2	ENSMUSP00000095199	14815	Nr3c1	Nr3c1	933
ENSMUSP00000006037	17978	Ncoa2	Ncoa2	ENSMUSP00000105049	19013	Ppara	Ppara	942
ENSMUSP00000006037	17978	Ncoa2	Ncoa2	ENSMUSP00000036585	20182	Rxrb	Rxrb	913
ENSMUSP00000006037	17978	Ncoa2	Ncoa2	ENSMUSP00000015987	20183	Rxrg	Rxrg	909
ENSMUSP00000006761	12395	Runx1t1	Runx1t1	ENSMUSP00000096129	12606	Cebpa	Cebpa	867
ENSMUSP00000009550	13712	Elk1	Elk1	ENSMUSP00000083743	13714	Elk4	Elk4	806
ENSMUSP00000015197	14461	Gata2	Gata2	ENSMUSP00000096129	12606	Cebpa	Cebpa	723
ENSMUSP00000015605	12915	Atf6b	Atf6b	ENSMUSP00000028663	26427	Creb3l1	Creb3l1	848
ENSMUSP00000015605	12915	Atf6b	Atf6b	ENSMUSP00000100008	12913	Creb3	Creb3	840
ENSMUSP00000015605	12915	Atf6b	Atf6b	ENSMUSP00000040208	208647	Creb3l2	Creb3l2	849
ENSMUSP00000015605	12915	Atf6b	Atf6b	ENSMUSP00000054852	22433	Xbp1	Xbp1	845
ENSMUSP00000015605	12915	Atf6b	Atf6b	ENSMUSP00000105234	11911	Atf4	Atf4	908
ENSMUSP00000015605	12915	Atf6b	Atf6b	ENSMUSP00000023769	11908	Atf1	Atf1	815
ENSMUSP00000015605	12915	Atf6b	Atf6b	ENSMUSP00000023769	100040260	Atf1-ps	Atf1-ps	815
ENSMUSP00000015605	12915	Atf6b	Atf6b	ENSMUSP00000027974	226641	Atf6	Atf6	847
ENSMUSP00000015605	12915	Atf6b	Atf6b	ENSMUSP00000140112	12912	Creb1	Creb1	839
ENSMUSP00000015605	12915	Atf6b	Atf6b	ENSMUSP00000107641	11909	Atf2	Atf2	807
ENSMUSP00000015987	20183	Rxrg	Rxrg	ENSMUSP00000023165	12914	Crebbp	Crebbp	850
ENSMUSP00000015987	20183	Rxrg	Rxrg	ENSMUSP00000082971	17977	Ncoa1	Ncoa1	891
ENSMUSP00000015987	20183	Rxrg	Rxrg	ENSMUSP00000022304	21834	Thrb	Thrb	970
ENSMUSP00000015987	20183	Rxrg	Rxrg	ENSMUSP00000069744	19401	Rara	Rara	964
ENSMUSP00000015987	20183	Rxrg	Rxrg	ENSMUSP00000066789	328572	Ep300	Ep300	854
ENSMUSP00000015987	20183	Rxrg	Rxrg	ENSMUSP00000036585	20182	Rxrb	Rxrb	932
ENSMUSP00000015987	20183	Rxrg	Rxrg	ENSMUSP00000076491	20181	Rxra	Rxra	942
ENSMUSP00000015987	20183	Rxrg	Rxrg	ENSMUSP00000067694	218772	Rarb	Rarb	967
ENSMUSP00000015987	20183	Rxrg	Rxrg	ENSMUSP00000105049	19013	Ppara	Ppara	857
ENSMUSP00000018407	21388	Tbx5	Tbx5	ENSMUSP00000080538	140781	Myh7	Myh7	737
ENSMUSP00000018407	21388	Tbx5	Tbx5	ENSMUSP00000066927	14463	Gata4	Gata4	968
ENSMUSP00000018407	21388	Tbx5	Tbx5	ENSMUSP00000041774	14465	Gata6	Gata6	711
ENSMUSP00000020908	50496	E2f6	E2f6	ENSMUSP00000106401	29808	Mga	Mga	980
ENSMUSP00000020908	50496	E2f6	E2f6	ENSMUSP00000128260	211586	Tfdp2	Tfdp2	981
ENSMUSP00000020908	50496	E2f6	E2f6	ENSMUSP00000127952	21781	Tfdp1	Tfdp1	988
ENSMUSP00000021062	13207	Ddx5	Ddx5	ENSMUSP00000082971	17977	Ncoa1	Ncoa1	920
ENSMUSP00000021062	13207	Ddx5	Ddx5	ENSMUSP00000066789	328572	Ep300	Ep300	923
ENSMUSP00000021062	13207	Ddx5	Ddx5	ENSMUSP00000104298	22059	Trp53	Trp53	739
ENSMUSP00000021674	14281	Fos	Fos	ENSMUSP00000023165	12914	Crebbp	Crebbp	808
ENSMUSP00000021674	14281	Fos	Fos	ENSMUSP00000082971	17977	Ncoa1	Ncoa1	871
ENSMUSP00000021674	14281	Fos	Fos	ENSMUSP00000105234	11911	Atf4	Atf4	789
ENSMUSP00000021674	14281	Fos	Fos	ENSMUSP00000066789	328572	Ep300	Ep300	951
ENSMUSP00000021674	14281	Fos	Fos	ENSMUSP00000104456	223922	Atf7	Atf7	769
ENSMUSP00000021674	14281	Fos	Fos	ENSMUSP00000095199	14815	Nr3c1	Nr3c1	828
ENSMUSP00000021674	14281	Fos	Fos	ENSMUSP00000104298	22059	Trp53	Trp53	719
ENSMUSP00000021674	14281	Fos	Fos	ENSMUSP00000120152	20848	Stat3	Stat3	912
ENSMUSP00000021674	14281	Fos	Fos	ENSMUSP00000129001	18018	Nfatc1	Nfatc1	898
ENSMUSP00000021674	14281	Fos	Fos	ENSMUSP00000107641	11909	Atf2	Atf2	979
ENSMUSP00000021674	14281	Fos	Fos	ENSMUSP00000023779	15370	Nr4a1	Nr4a1	813
ENSMUSP00000021674	14281	Fos	Fos	ENSMUSP00000092901	16478	Jund	Jund	985
ENSMUSP00000021674	14281	Fos	Fos	ENSMUSP00000027941	11910	Atf3	Atf3	887
ENSMUSP00000021674	14281	Fos	Fos	ENSMUSP00000066743	20846	Stat1	Stat1	741
ENSMUSP00000021674	14281	Fos	Fos	ENSMUSP00000140112	12912	Creb1	Creb1	926
ENSMUSP00000022304	21834	Thrb	Thrb	ENSMUSP00000023165	12914	Crebbp	Crebbp	752
ENSMUSP00000022304	21834	Thrb	Thrb	ENSMUSP00000082971	17977	Ncoa1	Ncoa1	902
ENSMUSP00000022304	21834	Thrb	Thrb	ENSMUSP00000066789	328572	Ep300	Ep300	773
ENSMUSP00000022304	21834	Thrb	Thrb	ENSMUSP00000036585	20182	Rxrb	Rxrb	950
ENSMUSP00000022304	21834	Thrb	Thrb	ENSMUSP00000076491	20181	Rxra	Rxra	989
ENSMUSP00000023024	21685	Tef	Tef	ENSMUSP00000079693	13170	Dbp	Dbp	876
ENSMUSP00000023024	21685	Tef	Tef	ENSMUSP00000069505	217166	Nr1d1	Nr1d1	780
ENSMUSP00000023024	21685	Tef	Tef	ENSMUSP00000069505	21833	Thra	Thra	780
ENSMUSP00000023165	12914	Crebbp	Crebbp	ENSMUSP00000028663	26427	Creb3l1	Creb3l1	825
ENSMUSP00000023165	12914	Crebbp	Crebbp	ENSMUSP00000112637	433586	Maml3	Maml3	903
ENSMUSP00000023165	12914	Crebbp	Crebbp	ENSMUSP00000082971	17977	Ncoa1	Ncoa1	999
ENSMUSP00000023165	12914	Crebbp	Crebbp	ENSMUSP00000059420	54601	Foxo4	Foxo4	812
ENSMUSP00000023165	12914	Crebbp	Crebbp	ENSMUSP00000040208	208647	Creb3l2	Creb3l2	826
ENSMUSP00000023165	12914	Crebbp	Crebbp	ENSMUSP00000029812	18033	Nfkb1	Nfkb1	947
ENSMUSP00000023165	12914	Crebbp	Crebbp	ENSMUSP00000105234	11911	Atf4	Atf4	898
ENSMUSP00000023165	12914	Crebbp	Crebbp	ENSMUSP00000069744	19401	Rara	Rara	947
ENSMUSP00000023165	12914	Crebbp	Crebbp	ENSMUSP00000066789	328572	Ep300	Ep300	983
ENSMUSP00000023165	12914	Crebbp	Crebbp	ENSMUSP00000050683	56484	Foxo3	Foxo3	977
ENSMUSP00000023165	12914	Crebbp	Crebbp	ENSMUSP00000095199	14815	Nr3c1	Nr3c1	732
ENSMUSP00000023165	12914	Crebbp	Crebbp	ENSMUSP00000104298	22059	Trp53	Trp53	997
ENSMUSP00000023165	12914	Crebbp	Crebbp	ENSMUSP00000036585	20182	Rxrb	Rxrb	868
ENSMUSP00000023165	12914	Crebbp	Crebbp	ENSMUSP00000102981	20851	Stat5b	Stat5b	798
ENSMUSP00000023165	12914	Crebbp	Crebbp	ENSMUSP00000023612	23872	Ets2	Ets2	701
ENSMUSP00000023165	12914	Crebbp	Crebbp	ENSMUSP00000120152	20848	Stat3	Stat3	882
ENSMUSP00000023165	12914	Crebbp	Crebbp	ENSMUSP00000107641	11909	Atf2	Atf2	896
ENSMUSP00000023165	12914	Crebbp	Crebbp	ENSMUSP00000100008	12913	Creb3	Creb3	820
ENSMUSP00000023165	12914	Crebbp	Crebbp	ENSMUSP00000076491	20181	Rxra	Rxra	983
ENSMUSP00000023165	12914	Crebbp	Crebbp	ENSMUSP00000067694	218772	Rarb	Rarb	938
ENSMUSP00000023165	12914	Crebbp	Crebbp	ENSMUSP00000100872	20847	Stat2	Stat2	846
ENSMUSP00000023165	12914	Crebbp	Crebbp	ENSMUSP00000026217	12675	Chuk	Chuk	802
ENSMUSP00000023165	12914	Crebbp	Crebbp	ENSMUSP00000055308	56458	Foxo1	Foxo1	827
ENSMUSP00000023165	12914	Crebbp	Crebbp	ENSMUSP00000023769	11908	Atf1	Atf1	787
ENSMUSP00000023165	12914	Crebbp	Crebbp	ENSMUSP00000023769	100040260	Atf1-ps	Atf1-ps	787
ENSMUSP00000023165	12914	Crebbp	Crebbp	ENSMUSP00000026571	54123	Irf7	Irf7	947
ENSMUSP00000023165	12914	Crebbp	Crebbp	ENSMUSP00000040694	19664	Rbpj	Rbpj	946
ENSMUSP00000023165	12914	Crebbp	Crebbp	ENSMUSP00000105049	19013	Ppara	Ppara	951
ENSMUSP00000023165	12914	Crebbp	Crebbp	ENSMUSP00000089708	20852	Stat6	Stat6	897
ENSMUSP00000023165	12914	Crebbp	Crebbp	ENSMUSP00000130115	17126	Smad2	Smad2	919
ENSMUSP00000023165	12914	Crebbp	Crebbp	ENSMUSP00000072617	15499	Hsf1	Hsf1	949
ENSMUSP00000023165	12914	Crebbp	Crebbp	ENSMUSP00000034534	23871	Ets1	Ets1	758
ENSMUSP00000023165	12914	Crebbp	Crebbp	ENSMUSP00000066743	20846	Stat1	Stat1	962
ENSMUSP00000023165	12914	Crebbp	Crebbp	ENSMUSP00000140112	12912	Creb1	Creb1	999
ENSMUSP00000023612	23872	Ets2	Ets2	ENSMUSP00000104298	22059	Trp53	Trp53	746
ENSMUSP00000023612	23872	Ets2	Ets2	ENSMUSP00000034534	23871	Ets1	Ets1	915
ENSMUSP00000023769	11908	Atf1	Atf1	ENSMUSP00000028663	26427	Creb3l1	Creb3l1	812
ENSMUSP00000023769	100040260	Atf1-ps	Atf1-ps	ENSMUSP00000028663	26427	Creb3l1	Creb3l1	812
ENSMUSP00000023769	11908	Atf1	Atf1	ENSMUSP00000100008	12913	Creb3	Creb3	848
ENSMUSP00000023769	100040260	Atf1-ps	Atf1-ps	ENSMUSP00000100008	12913	Creb3	Creb3	848
ENSMUSP00000023769	11908	Atf1	Atf1	ENSMUSP00000040208	208647	Creb3l2	Creb3l2	858
ENSMUSP00000023769	100040260	Atf1-ps	Atf1-ps	ENSMUSP00000040208	208647	Creb3l2	Creb3l2	858
ENSMUSP00000023769	11908	Atf1	Atf1	ENSMUSP00000054852	22433	Xbp1	Xbp1	800
ENSMUSP00000023769	100040260	Atf1-ps	Atf1-ps	ENSMUSP00000054852	22433	Xbp1	Xbp1	800
ENSMUSP00000023769	11908	Atf1	Atf1	ENSMUSP00000105234	11911	Atf4	Atf4	917
ENSMUSP00000023769	100040260	Atf1-ps	Atf1-ps	ENSMUSP00000105234	11911	Atf4	Atf4	917
ENSMUSP00000023769	11908	Atf1	Atf1	ENSMUSP00000027941	11910	Atf3	Atf3	864
ENSMUSP00000023769	100040260	Atf1-ps	Atf1-ps	ENSMUSP00000027941	11910	Atf3	Atf3	864
ENSMUSP00000023769	11908	Atf1	Atf1	ENSMUSP00000140112	12912	Creb1	Creb1	977
ENSMUSP00000023769	100040260	Atf1-ps	Atf1-ps	ENSMUSP00000140112	12912	Creb1	Creb1	977
ENSMUSP00000023769	11908	Atf1	Atf1	ENSMUSP00000107641	11909	Atf2	Atf2	872
ENSMUSP00000023769	100040260	Atf1-ps	Atf1-ps	ENSMUSP00000107641	11909	Atf2	Atf2	872
ENSMUSP00000023779	15370	Nr4a1	Nr4a1	ENSMUSP00000076491	20181	Rxra	Rxra	849
ENSMUSP00000024179	73181	Nfatc4	Nfatc4	ENSMUSP00000074198	18019	Nfatc2	Nfatc2	836
ENSMUSP00000024179	73181	Nfatc4	Nfatc4	ENSMUSP00000066927	14463	Gata4	Gata4	949
ENSMUSP00000024179	73181	Nfatc4	Nfatc4	ENSMUSP00000104931	18021	Nfatc3	Nfatc3	923
ENSMUSP00000025393	17128	Smad4	Smad4	ENSMUSP00000050683	56484	Foxo3	Foxo3	979
ENSMUSP00000025393	17128	Smad4	Smad4	ENSMUSP00000104298	22059	Trp53	Trp53	808
ENSMUSP00000025393	17128	Smad4	Smad4	ENSMUSP00000105502	17129	Smad5	Smad5	971
ENSMUSP00000025393	17128	Smad4	Smad4	ENSMUSP00000128260	211586	Tfdp2	Tfdp2	905
ENSMUSP00000025393	17128	Smad4	Smad4	ENSMUSP00000066927	14463	Gata4	Gata4	717
ENSMUSP00000025393	17128	Smad4	Smad4	ENSMUSP00000127877	13559	E2f5	E2f5	934
ENSMUSP00000025393	17128	Smad4	Smad4	ENSMUSP00000127952	21781	Tfdp1	Tfdp1	909
ENSMUSP00000025393	17128	Smad4	Smad4	ENSMUSP00000130115	17126	Smad2	Smad2	995
ENSMUSP00000025906	26379	Esrra	Esrra	ENSMUSP00000082971	17977	Ncoa1	Ncoa1	763
ENSMUSP00000026217	12675	Chuk	Chuk	ENSMUSP00000059420	54601	Foxo4	Foxo4	821
ENSMUSP00000026217	12675	Chuk	Chuk	ENSMUSP00000099928	19696	Rel	Rel	971
ENSMUSP00000026217	12675	Chuk	Chuk	ENSMUSP00000029812	18033	Nfkb1	Nfkb1	986
ENSMUSP00000026217	12675	Chuk	Chuk	ENSMUSP00000050683	56484	Foxo3	Foxo3	889
ENSMUSP00000026217	12675	Chuk	Chuk	ENSMUSP00000107512	18034	Nfkb2	Nfkb2	984
ENSMUSP00000026217	12675	Chuk	Chuk	ENSMUSP00000099716	329934	Foxo6	Foxo6	819
ENSMUSP00000026217	12675	Chuk	Chuk	ENSMUSP00000034359	71609	Tradd	Tradd	952
ENSMUSP00000026217	12675	Chuk	Chuk	ENSMUSP00000055308	56458	Foxo1	Foxo1	832
ENSMUSP00000026217	12675	Chuk	Chuk	ENSMUSP00000026571	54123	Irf7	Irf7	960
ENSMUSP00000026217	12675	Chuk	Chuk	ENSMUSP00000092355	19698	Relb	Relb	969
ENSMUSP00000026571	54123	Irf7	Irf7	ENSMUSP00000100872	20847	Stat2	Stat2	936
ENSMUSP00000026571	54123	Irf7	Irf7	ENSMUSP00000066789	328572	Ep300	Ep300	926
ENSMUSP00000026571	54123	Irf7	Irf7	ENSMUSP00000120525	16391	Irf9	Irf9	839
ENSMUSP00000026571	54123	Irf7	Irf7	ENSMUSP00000066743	20846	Stat1	Stat1	952
ENSMUSP00000026999	17131	Smad7	Smad7	ENSMUSP00000105502	17129	Smad5	Smad5	939
ENSMUSP00000026999	17131	Smad7	Smad7	ENSMUSP00000130115	17126	Smad2	Smad2	943
ENSMUSP00000027438	17975	Ncl	Ncl	ENSMUSP00000104298	22059	Trp53	Trp53	796
ENSMUSP00000027906	26381	Esrrg	Esrrg	ENSMUSP00000082971	17977	Ncoa1	Ncoa1	976
ENSMUSP00000027941	11910	Atf3	Atf3	ENSMUSP00000054852	22433	Xbp1	Xbp1	934
ENSMUSP00000027941	11910	Atf3	Atf3	ENSMUSP00000105234	11911	Atf4	Atf4	987
ENSMUSP00000027941	11910	Atf3	Atf3	ENSMUSP00000104298	22059	Trp53	Trp53	800
ENSMUSP00000027941	11910	Atf3	Atf3	ENSMUSP00000120152	20848	Stat3	Stat3	731
ENSMUSP00000027941	11910	Atf3	Atf3	ENSMUSP00000107641	11909	Atf2	Atf2	900
ENSMUSP00000027941	11910	Atf3	Atf3	ENSMUSP00000027974	226641	Atf6	Atf6	709
ENSMUSP00000027941	11910	Atf3	Atf3	ENSMUSP00000072617	15499	Hsf1	Hsf1	713
ENSMUSP00000027941	11910	Atf3	Atf3	ENSMUSP00000066743	20846	Stat1	Stat1	719
ENSMUSP00000027941	11910	Atf3	Atf3	ENSMUSP00000140112	12912	Creb1	Creb1	964
ENSMUSP00000027974	226641	Atf6	Atf6	ENSMUSP00000054852	22433	Xbp1	Xbp1	982
ENSMUSP00000027974	226641	Atf6	Atf6	ENSMUSP00000105234	11911	Atf4	Atf4	965
ENSMUSP00000028663	26427	Creb3l1	Creb3l1	ENSMUSP00000100008	12913	Creb3	Creb3	884
ENSMUSP00000028663	26427	Creb3l1	Creb3l1	ENSMUSP00000040208	208647	Creb3l2	Creb3l2	852
ENSMUSP00000028663	26427	Creb3l1	Creb3l1	ENSMUSP00000105234	11911	Atf4	Atf4	901
ENSMUSP00000028663	26427	Creb3l1	Creb3l1	ENSMUSP00000066789	328572	Ep300	Ep300	812
ENSMUSP00000028663	26427	Creb3l1	Creb3l1	ENSMUSP00000140112	12912	Creb1	Creb1	854
ENSMUSP00000028663	26427	Creb3l1	Creb3l1	ENSMUSP00000107641	11909	Atf2	Atf2	824
ENSMUSP00000029795	19885	Rorc	Rorc	ENSMUSP00000082971	17977	Ncoa1	Ncoa1	787
ENSMUSP00000029795	19885	Rorc	Rorc	ENSMUSP00000120152	20848	Stat3	Stat3	812
ENSMUSP00000029812	18033	Nfkb1	Nfkb1	ENSMUSP00000099928	19696	Rel	Rel	987
ENSMUSP00000029812	18033	Nfkb1	Nfkb1	ENSMUSP00000082682	232875	Zscan18	Zscan18	928
ENSMUSP00000029812	18033	Nfkb1	Nfkb1	ENSMUSP00000066789	328572	Ep300	Ep300	943
ENSMUSP00000029812	18033	Nfkb1	Nfkb1	ENSMUSP00000050683	56484	Foxo3	Foxo3	723
ENSMUSP00000029812	18033	Nfkb1	Nfkb1	ENSMUSP00000104298	22059	Trp53	Trp53	743
ENSMUSP00000029812	18033	Nfkb1	Nfkb1	ENSMUSP00000107512	18034	Nfkb2	Nfkb2	954
ENSMUSP00000029812	18033	Nfkb1	Nfkb1	ENSMUSP00000092355	19698	Relb	Relb	996
ENSMUSP00000031545	114142	Foxp2	Foxp2	ENSMUSP00000074198	18019	Nfatc2	Nfatc2	816
ENSMUSP00000031545	114142	Foxp2	Foxp2	ENSMUSP00000094916	74123	Foxp4	Foxp4	714
ENSMUSP00000034534	23871	Ets1	Ets1	ENSMUSP00000104298	22059	Trp53	Trp53	775
ENSMUSP00000034534	23871	Ets1	Ets1	ENSMUSP00000055308	56458	Foxo1	Foxo1	835
ENSMUSP00000034991	76365	Tbx18	Tbx18	ENSMUSP00000066927	14463	Gata4	Gata4	790
ENSMUSP00000036585	20182	Rxrb	Rxrb	ENSMUSP00000082971	17977	Ncoa1	Ncoa1	892
ENSMUSP00000036585	20182	Rxrb	Rxrb	ENSMUSP00000069744	19401	Rara	Rara	982
ENSMUSP00000036585	20182	Rxrb	Rxrb	ENSMUSP00000066789	328572	Ep300	Ep300	868
ENSMUSP00000036585	20182	Rxrb	Rxrb	ENSMUSP00000076491	20181	Rxra	Rxra	905
ENSMUSP00000036585	20182	Rxrb	Rxrb	ENSMUSP00000067694	218772	Rarb	Rarb	969
ENSMUSP00000036585	20182	Rxrb	Rxrb	ENSMUSP00000105049	19013	Ppara	Ppara	851
ENSMUSP00000040208	208647	Creb3l2	Creb3l2	ENSMUSP00000100008	12913	Creb3	Creb3	869
ENSMUSP00000040208	208647	Creb3l2	Creb3l2	ENSMUSP00000105234	11911	Atf4	Atf4	877
ENSMUSP00000040208	208647	Creb3l2	Creb3l2	ENSMUSP00000066789	328572	Ep300	Ep300	834
ENSMUSP00000040208	208647	Creb3l2	Creb3l2	ENSMUSP00000047771	107503	Atf5	Atf5	754
ENSMUSP00000040208	208647	Creb3l2	Creb3l2	ENSMUSP00000140112	12912	Creb1	Creb1	846
ENSMUSP00000040208	208647	Creb3l2	Creb3l2	ENSMUSP00000107641	11909	Atf2	Atf2	829
ENSMUSP00000040245	15900	Irf8	Irf8	ENSMUSP00000066743	20846	Stat1	Stat1	837
ENSMUSP00000040694	19664	Rbpj	Rbpj	ENSMUSP00000112637	433586	Maml3	Maml3	991
ENSMUSP00000040694	19664	Rbpj	Rbpj	ENSMUSP00000066789	328572	Ep300	Ep300	966
ENSMUSP00000040694	19664	Rbpj	Rbpj	ENSMUSP00000104298	22059	Trp53	Trp53	716
ENSMUSP00000040694	19664	Rbpj	Rbpj	ENSMUSP00000129001	18018	Nfatc1	Nfatc1	749
ENSMUSP00000040694	19664	Rbpj	Rbpj	ENSMUSP00000140112	12912	Creb1	Creb1	928
ENSMUSP00000041774	14465	Gata6	Gata6	ENSMUSP00000052591	57246	Tbx20	Tbx20	722
ENSMUSP00000044517	21807	Tsc22d1	Tsc22d1	ENSMUSP00000108620	14605	Tsc22d3	Tsc22d3	738
ENSMUSP00000045805	385674	Zfp174	Zfp174	ENSMUSP00000064637	59057	Zfp24	Zfp24	769
ENSMUSP00000045993	18109	Mycn	Mycn	ENSMUSP00000104298	22059	Trp53	Trp53	869
ENSMUSP00000050683	56484	Foxo3	Foxo3	ENSMUSP00000059420	54601	Foxo4	Foxo4	910
ENSMUSP00000050683	56484	Foxo3	Foxo3	ENSMUSP00000066789	328572	Ep300	Ep300	951
ENSMUSP00000050683	56484	Foxo3	Foxo3	ENSMUSP00000104298	22059	Trp53	Trp53	893
ENSMUSP00000050683	56484	Foxo3	Foxo3	ENSMUSP00000120152	20848	Stat3	Stat3	913
ENSMUSP00000050683	56484	Foxo3	Foxo3	ENSMUSP00000055308	56458	Foxo1	Foxo1	911
ENSMUSP00000050683	56484	Foxo3	Foxo3	ENSMUSP00000130115	17126	Smad2	Smad2	973
ENSMUSP00000050683	56484	Foxo3	Foxo3	ENSMUSP00000072617	15499	Hsf1	Hsf1	740
ENSMUSP00000050683	56484	Foxo3	Foxo3	ENSMUSP00000140112	12912	Creb1	Creb1	773
ENSMUSP00000052591	57246	Tbx20	Tbx20	ENSMUSP00000066927	14463	Gata4	Gata4	878
ENSMUSP00000054852	22433	Xbp1	Xbp1	ENSMUSP00000105234	11911	Atf4	Atf4	987
ENSMUSP00000054852	22433	Xbp1	Xbp1	ENSMUSP00000140112	12912	Creb1	Creb1	892
ENSMUSP00000054852	22433	Xbp1	Xbp1	ENSMUSP00000107641	11909	Atf2	Atf2	862
ENSMUSP00000055308	56458	Foxo1	Foxo1	ENSMUSP00000059420	54601	Foxo4	Foxo4	913
ENSMUSP00000055308	56458	Foxo1	Foxo1	ENSMUSP00000105234	11911	Atf4	Atf4	729
ENSMUSP00000055308	56458	Foxo1	Foxo1	ENSMUSP00000096129	12606	Cebpa	Cebpa	843
ENSMUSP00000055308	56458	Foxo1	Foxo1	ENSMUSP00000099984	103988	Gck	Gck	752
ENSMUSP00000055308	56458	Foxo1	Foxo1	ENSMUSP00000095199	14815	Nr3c1	Nr3c1	728
ENSMUSP00000055308	56458	Foxo1	Foxo1	ENSMUSP00000104298	22059	Trp53	Trp53	720
ENSMUSP00000055308	56458	Foxo1	Foxo1	ENSMUSP00000120152	20848	Stat3	Stat3	932
ENSMUSP00000055308	56458	Foxo1	Foxo1	ENSMUSP00000130115	17126	Smad2	Smad2	913
ENSMUSP00000055308	56458	Foxo1	Foxo1	ENSMUSP00000140112	12912	Creb1	Creb1	789
ENSMUSP00000057253	69256	Zfp397	Zfp397	ENSMUSP00000064637	59057	Zfp24	Zfp24	707
ENSMUSP00000059420	54601	Foxo4	Foxo4	ENSMUSP00000104298	22059	Trp53	Trp53	953
ENSMUSP00000059420	54601	Foxo4	Foxo4	ENSMUSP00000120152	20848	Stat3	Stat3	850
ENSMUSP00000060671	21676	Tead1	Tead1	ENSMUSP00000103431	21677	Tead2	Tead2	755
ENSMUSP00000064637	59057	Zfp24	Zfp24	ENSMUSP00000105211	19018	Scand1	Scand1	733
ENSMUSP00000064637	59057	Zfp24	Zfp24	ENSMUSP00000139601	225908	Myrf	Myrf	799
ENSMUSP00000065363	18030	Nfil3	Nfil3	ENSMUSP00000069505	217166	Nr1d1	Nr1d1	701
ENSMUSP00000065363	18030	Nfil3	Nfil3	ENSMUSP00000069505	21833	Thra	Thra	701
ENSMUSP00000066743	20846	Stat1	Stat1	ENSMUSP00000066789	328572	Ep300	Ep300	928
ENSMUSP00000066743	20846	Stat1	Stat1	ENSMUSP00000104298	22059	Trp53	Trp53	797
ENSMUSP00000066743	20846	Stat1	Stat1	ENSMUSP00000120525	16391	Irf9	Irf9	997
ENSMUSP00000066743	20846	Stat1	Stat1	ENSMUSP00000102981	20851	Stat5b	Stat5b	946
ENSMUSP00000066743	20846	Stat1	Stat1	ENSMUSP00000120152	20848	Stat3	Stat3	967
ENSMUSP00000066743	20846	Stat1	Stat1	ENSMUSP00000100872	20847	Stat2	Stat2	979
ENSMUSP00000066743	20846	Stat1	Stat1	ENSMUSP00000089708	20852	Stat6	Stat6	932
ENSMUSP00000066789	328572	Ep300	Ep300	ENSMUSP00000112637	433586	Maml3	Maml3	906
ENSMUSP00000066789	328572	Ep300	Ep300	ENSMUSP00000082971	17977	Ncoa1	Ncoa1	994
ENSMUSP00000066789	328572	Ep300	Ep300	ENSMUSP00000105234	11911	Atf4	Atf4	865
ENSMUSP00000066789	328572	Ep300	Ep300	ENSMUSP00000069744	19401	Rara	Rara	972
ENSMUSP00000066789	328572	Ep300	Ep300	ENSMUSP00000096129	12606	Cebpa	Cebpa	746
ENSMUSP00000066789	328572	Ep300	Ep300	ENSMUSP00000104298	22059	Trp53	Trp53	997
ENSMUSP00000066789	328572	Ep300	Ep300	ENSMUSP00000093959	23942	Mta2	Mta2	915
ENSMUSP00000066789	328572	Ep300	Ep300	ENSMUSP00000102981	20851	Stat5b	Stat5b	798
ENSMUSP00000066789	328572	Ep300	Ep300	ENSMUSP00000120152	20848	Stat3	Stat3	863
ENSMUSP00000066789	328572	Ep300	Ep300	ENSMUSP00000135516	18514	Pbx1	Pbx1	927
ENSMUSP00000066789	328572	Ep300	Ep300	ENSMUSP00000107641	11909	Atf2	Atf2	965
ENSMUSP00000066789	328572	Ep300	Ep300	ENSMUSP00000066927	14463	Gata4	Gata4	757
ENSMUSP00000066789	328572	Ep300	Ep300	ENSMUSP00000100008	12913	Creb3	Creb3	821
ENSMUSP00000066789	328572	Ep300	Ep300	ENSMUSP00000076491	20181	Rxra	Rxra	974
ENSMUSP00000066789	328572	Ep300	Ep300	ENSMUSP00000067694	218772	Rarb	Rarb	971
ENSMUSP00000066789	328572	Ep300	Ep300	ENSMUSP00000100872	20847	Stat2	Stat2	793
ENSMUSP00000066789	328572	Ep300	Ep300	ENSMUSP00000069505	217166	Nr1d1	Nr1d1	919
ENSMUSP00000066789	328572	Ep300	Ep300	ENSMUSP00000069505	21833	Thra	Thra	919
ENSMUSP00000066789	328572	Ep300	Ep300	ENSMUSP00000089708	20852	Stat6	Stat6	891
ENSMUSP00000066789	328572	Ep300	Ep300	ENSMUSP00000130115	17126	Smad2	Smad2	903
ENSMUSP00000066789	328572	Ep300	Ep300	ENSMUSP00000072617	15499	Hsf1	Hsf1	944
ENSMUSP00000066789	328572	Ep300	Ep300	ENSMUSP00000140112	12912	Creb1	Creb1	996
ENSMUSP00000066927	14463	Gata4	Gata4	ENSMUSP00000080538	140781	Myh7	Myh7	754
ENSMUSP00000066927	14463	Gata4	Gata4	ENSMUSP00000129001	18018	Nfatc1	Nfatc1	865
ENSMUSP00000066927	14463	Gata4	Gata4	ENSMUSP00000074198	18019	Nfatc2	Nfatc2	845
ENSMUSP00000066927	14463	Gata4	Gata4	ENSMUSP00000104931	18021	Nfatc3	Nfatc3	889
ENSMUSP00000066927	14463	Gata4	Gata4	ENSMUSP00000130115	17126	Smad2	Smad2	718
ENSMUSP00000067694	218772	Rarb	Rarb	ENSMUSP00000082971	17977	Ncoa1	Ncoa1	976
ENSMUSP00000067694	218772	Rarb	Rarb	ENSMUSP00000069744	19401	Rara	Rara	981
ENSMUSP00000067694	218772	Rarb	Rarb	ENSMUSP00000076491	20181	Rxra	Rxra	997
ENSMUSP00000069505	217166	Nr1d1	Nr1d1	ENSMUSP00000078761	15500	Hsf2	Hsf2	869
ENSMUSP00000069505	21833	Thra	Thra	ENSMUSP00000078761	15500	Hsf2	Hsf2	869
ENSMUSP00000069505	217166	Nr1d1	Nr1d1	ENSMUSP00000079693	13170	Dbp	Dbp	851
ENSMUSP00000069505	21833	Thra	Thra	ENSMUSP00000079693	13170	Dbp	Dbp	851
ENSMUSP00000069744	19401	Rara	Rara	ENSMUSP00000082971	17977	Ncoa1	Ncoa1	955
ENSMUSP00000069744	19401	Rara	Rara	ENSMUSP00000135516	18514	Pbx1	Pbx1	937
ENSMUSP00000069744	19401	Rara	Rara	ENSMUSP00000076491	20181	Rxra	Rxra	995
ENSMUSP00000072617	15499	Hsf1	Hsf1	ENSMUSP00000104298	22059	Trp53	Trp53	732
ENSMUSP00000072617	15499	Hsf1	Hsf1	ENSMUSP00000078761	15500	Hsf2	Hsf2	760
ENSMUSP00000074198	18019	Nfatc2	Nfatc2	ENSMUSP00000099928	19696	Rel	Rel	813
ENSMUSP00000074198	18019	Nfatc2	Nfatc2	ENSMUSP00000135181	108655	Foxp1	Foxp1	735
ENSMUSP00000074198	18019	Nfatc2	Nfatc2	ENSMUSP00000104931	18021	Nfatc3	Nfatc3	918
ENSMUSP00000074198	18019	Nfatc2	Nfatc2	ENSMUSP00000094916	74123	Foxp4	Foxp4	721
ENSMUSP00000074198	18019	Nfatc2	Nfatc2	ENSMUSP00000129001	18018	Nfatc1	Nfatc1	918
ENSMUSP00000076491	20181	Rxra	Rxra	ENSMUSP00000082971	17977	Ncoa1	Ncoa1	988
ENSMUSP00000076491	20181	Rxra	Rxra	ENSMUSP00000135516	18514	Pbx1	Pbx1	924
ENSMUSP00000076491	20181	Rxra	Rxra	ENSMUSP00000105049	19013	Ppara	Ppara	969
ENSMUSP00000079818	14011	Etv6	Etv6	ENSMUSP00000135516	18514	Pbx1	Pbx1	702
ENSMUSP00000080538	140781	Myh7	Myh7	ENSMUSP00000099867	68966	Ngdn	Ngdn	953
ENSMUSP00000082682	232875	Zscan18	Zscan18	ENSMUSP00000104298	22059	Trp53	Trp53	961
ENSMUSP00000082682	232875	Zscan18	Zscan18	ENSMUSP00000107512	18034	Nfkb2	Nfkb2	913
ENSMUSP00000082971	17977	Ncoa1	Ncoa1	ENSMUSP00000095199	14815	Nr3c1	Nr3c1	806
ENSMUSP00000082971	17977	Ncoa1	Ncoa1	ENSMUSP00000105049	19013	Ppara	Ppara	987
ENSMUSP00000082971	17977	Ncoa1	Ncoa1	ENSMUSP00000089708	20852	Stat6	Stat6	814
ENSMUSP00000089708	20852	Stat6	Stat6	ENSMUSP00000120525	16391	Irf9	Irf9	790
ENSMUSP00000089708	20852	Stat6	Stat6	ENSMUSP00000102981	20851	Stat5b	Stat5b	825
ENSMUSP00000089708	20852	Stat6	Stat6	ENSMUSP00000120152	20848	Stat3	Stat3	933
ENSMUSP00000089708	20852	Stat6	Stat6	ENSMUSP00000100872	20847	Stat2	Stat2	884
ENSMUSP00000092355	19698	Relb	Relb	ENSMUSP00000099928	19696	Rel	Rel	898
ENSMUSP00000092355	19698	Relb	Relb	ENSMUSP00000107512	18034	Nfkb2	Nfkb2	999
ENSMUSP00000092901	16478	Jund	Jund	ENSMUSP00000107641	11909	Atf2	Atf2	760
ENSMUSP00000093959	23942	Mta2	Mta2	ENSMUSP00000112915	27049	Etv3	Etv3	720
ENSMUSP00000093959	23942	Mta2	Mta2	ENSMUSP00000104298	22059	Trp53	Trp53	929
ENSMUSP00000093959	23942	Mta2	Mta2	ENSMUSP00000101307	68703	Rere	Rere	756
ENSMUSP00000095199	14815	Nr3c1	Nr3c1	ENSMUSP00000105538	110784	Nr3c2	Nr3c2	927
ENSMUSP00000095199	14815	Nr3c1	Nr3c1	ENSMUSP00000140112	12912	Creb1	Creb1	707
ENSMUSP00000096129	12606	Cebpa	Cebpa	ENSMUSP00000099434	13555	E2f1	E2f1	789
ENSMUSP00000096129	12606	Cebpa	Cebpa	ENSMUSP00000140112	12912	Creb1	Creb1	727
ENSMUSP00000096688	72033	Tsc22d2	Tsc22d2	ENSMUSP00000108620	14605	Tsc22d3	Tsc22d3	748
ENSMUSP00000099434	13555	E2f1	E2f1	ENSMUSP00000104298	22059	Trp53	Trp53	786
ENSMUSP00000099434	13555	E2f1	E2f1	ENSMUSP00000100012	13557	E2f3	E2f3	923
ENSMUSP00000099434	13555	E2f1	E2f1	ENSMUSP00000128260	211586	Tfdp2	Tfdp2	987
ENSMUSP00000099434	13555	E2f1	E2f1	ENSMUSP00000127877	13559	E2f5	E2f5	928
ENSMUSP00000099434	13555	E2f1	E2f1	ENSMUSP00000127952	21781	Tfdp1	Tfdp1	989
ENSMUSP00000099716	329934	Foxo6	Foxo6	ENSMUSP00000120152	20848	Stat3	Stat3	814
ENSMUSP00000099928	19696	Rel	Rel	ENSMUSP00000107512	18034	Nfkb2	Nfkb2	908
ENSMUSP00000100008	12913	Creb3	Creb3	ENSMUSP00000105234	11911	Atf4	Atf4	901
ENSMUSP00000100008	12913	Creb3	Creb3	ENSMUSP00000140112	12912	Creb1	Creb1	890
ENSMUSP00000100008	12913	Creb3	Creb3	ENSMUSP00000107641	11909	Atf2	Atf2	813
ENSMUSP00000100012	13557	E2f3	E2f3	ENSMUSP00000128260	211586	Tfdp2	Tfdp2	982
ENSMUSP00000100012	13557	E2f3	E2f3	ENSMUSP00000127952	21781	Tfdp1	Tfdp1	985
ENSMUSP00000100872	20847	Stat2	Stat2	ENSMUSP00000120525	16391	Irf9	Irf9	999
ENSMUSP00000100872	20847	Stat2	Stat2	ENSMUSP00000102981	20851	Stat5b	Stat5b	925
ENSMUSP00000100872	20847	Stat2	Stat2	ENSMUSP00000120152	20848	Stat3	Stat3	961
ENSMUSP00000102981	20851	Stat5b	Stat5b	ENSMUSP00000120525	16391	Irf9	Irf9	737
ENSMUSP00000102981	20851	Stat5b	Stat5b	ENSMUSP00000120152	20848	Stat3	Stat3	948
ENSMUSP00000104298	22059	Trp53	Trp53	ENSMUSP00000120152	20848	Stat3	Stat3	894
ENSMUSP00000104298	22059	Trp53	Trp53	ENSMUSP00000126909	72504	Taf4b	Taf4b	900
ENSMUSP00000104298	22059	Trp53	Trp53	ENSMUSP00000130115	17126	Smad2	Smad2	719
ENSMUSP00000104298	22059	Trp53	Trp53	ENSMUSP00000140112	12912	Creb1	Creb1	856
ENSMUSP00000104456	223922	Atf7	Atf7	ENSMUSP00000107641	11909	Atf2	Atf2	831
ENSMUSP00000104931	18021	Nfatc3	Nfatc3	ENSMUSP00000129001	18018	Nfatc1	Nfatc1	916
ENSMUSP00000105234	11911	Atf4	Atf4	ENSMUSP00000140112	12912	Creb1	Creb1	966
ENSMUSP00000105234	11911	Atf4	Atf4	ENSMUSP00000107641	11909	Atf2	Atf2	896
ENSMUSP00000106401	29808	Mga	Mga	ENSMUSP00000127952	21781	Tfdp1	Tfdp1	919
ENSMUSP00000107641	11909	Atf2	Atf2	ENSMUSP00000140112	12912	Creb1	Creb1	945
ENSMUSP00000120152	20848	Stat3	Stat3	ENSMUSP00000120525	16391	Irf9	Irf9	849
ENSMUSP00000120152	20848	Stat3	Stat3	ENSMUSP00000130115	17126	Smad2	Smad2	803
ENSMUSP00000120152	20848	Stat3	Stat3	ENSMUSP00000140112	12912	Creb1	Creb1	736
ENSMUSP00000127877	13559	E2f5	E2f5	ENSMUSP00000128260	211586	Tfdp2	Tfdp2	995
ENSMUSP00000127877	13559	E2f5	E2f5	ENSMUSP00000127952	21781	Tfdp1	Tfdp1	993
ENSMUSP00000127877	13559	E2f5	E2f5	ENSMUSP00000130115	17126	Smad2	Smad2	916
ENSMUSP00000127952	21781	Tfdp1	Tfdp1	ENSMUSP00000128260	211586	Tfdp2	Tfdp2	904
ENSMUSP00000127952	21781	Tfdp1	Tfdp1	ENSMUSP00000130115	17126	Smad2	Smad2	903
ENSMUSP00000128260	211586	Tfdp2	Tfdp2	ENSMUSP00000130115	17126	Smad2	Smad2	902
ENSMUSP00000129001	18018	Nfatc1	Nfatc1	ENSMUSP00000140112	12912	Creb1	Creb1	730
