# Supplementary material for: Novel Transcriptomic Interactomes of Noncoding RNAs in the Heart under Altered Thyroid Hormonal States
Source: Int J Mol Sci. 2023 Mar 31;24(7):6560. doi: 10.3390/ijms24076560 (PMC10095585; doi:10.3390/ijms24076560)
Supplement: Supplementary file 1 [file ijms-24-06560-s001.zip › Supplemental File S18 miRNA interacting Partners of Differentially Expressed circRNAs.xlsx]

## Sheet: Supplemental File 20 miRNA inte
miRNA	circRNA
mmu-miR-23b-5p	mmu_circ_1539_junction_seq
mmu-miR-450b-5p	mmu_circ_1539_junction_seq
mmu-miR-490-3p	mmu_circ_1539_junction_seq
mmu-let-7a-2-3p	mmu_circ_1539_NM_001385708.1
mmu-miR-12184-3p	mmu_circ_1539_NM_001385708.1
mmu-miR-127-5p	mmu_circ_1539_NM_001385708.1
mmu-miR-129-5p	mmu_circ_1539_NM_001385708.1
mmu-miR-1291	mmu_circ_1539_NM_001385708.1
mmu-miR-1306-5p	mmu_circ_1539_NM_001385708.1
mmu-miR-130a-3p	mmu_circ_1539_NM_001385708.1
mmu-miR-130b-5p	mmu_circ_1539_NM_001385708.1
mmu-miR-132-3p	mmu_circ_1539_NM_001385708.1
mmu-miR-133a-3p	mmu_circ_1539_NM_001385708.1
mmu-miR-133b-3p	mmu_circ_1539_NM_001385708.1
mmu-miR-138-5p	mmu_circ_1539_NM_001385708.1
mmu-miR-140-5p	mmu_circ_1539_NM_001385708.1
mmu-miR-140-3p	mmu_circ_1539_NM_001385708.1
mmu-miR-144-5p	mmu_circ_1539_NM_001385708.1
mmu-miR-145a-3p	mmu_circ_1539_NM_001385708.1
mmu-miR-145a-5p	mmu_circ_1539_NM_001385708.1
mmu-miR-148a-5p	mmu_circ_1539_NM_001385708.1
mmu-miR-148a-3p	mmu_circ_1539_NM_001385708.1
mmu-miR-148b-5p	mmu_circ_1539_NM_001385708.1
mmu-miR-149-5p	mmu_circ_1539_NM_001385708.1
mmu-miR-150-5p	mmu_circ_1539_NM_001385708.1
mmu-miR-151-3p	mmu_circ_1539_NM_001385708.1
mmu-miR-152-5p	mmu_circ_1539_NM_001385708.1
mmu-miR-15a-5p	mmu_circ_1539_NM_001385708.1
mmu-miR-15b-5p	mmu_circ_1539_NM_001385708.1
mmu-miR-16-5p	mmu_circ_1539_NM_001385708.1
mmu-miR-181a-5p	mmu_circ_1539_NM_001385708.1
mmu-miR-181a-1-3p	mmu_circ_1539_NM_001385708.1
mmu-miR-181a-2-3p	mmu_circ_1539_NM_001385708.1
mmu-miR-181b-5p	mmu_circ_1539_NM_001385708.1
mmu-miR-181c-5p	mmu_circ_1539_NM_001385708.1
mmu-miR-181c-3p	mmu_circ_1539_NM_001385708.1
mmu-miR-181d-5p	mmu_circ_1539_NM_001385708.1
mmu-miR-1843b-5p	mmu_circ_1539_NM_001385708.1
mmu-miR-187-3p	mmu_circ_1539_NM_001385708.1
mmu-miR-191-3p	mmu_circ_1539_NM_001385708.1
mmu-miR-1938	mmu_circ_1539_NM_001385708.1
mmu-miR-193b-3p	mmu_circ_1539_NM_001385708.1
mmu-miR-194-5p	mmu_circ_1539_NM_001385708.1
mmu-miR-1943-5p	mmu_circ_1539_NM_001385708.1
mmu-miR-195a-5p	mmu_circ_1539_NM_001385708.1
mmu-miR-1981-5p	mmu_circ_1539_NM_001385708.1
mmu-miR-1983	mmu_circ_1539_NM_001385708.1
mmu-miR-199a-5p	mmu_circ_1539_NM_001385708.1
mmu-miR-199b-5p	mmu_circ_1539_NM_001385708.1
mmu-miR-204-5p	mmu_circ_1539_NM_001385708.1
mmu-miR-205-5p	mmu_circ_1539_NM_001385708.1
mmu-miR-208a-5p	mmu_circ_1539_NM_001385708.1
mmu-miR-208b-5p	mmu_circ_1539_NM_001385708.1
mmu-miR-212-5p	mmu_circ_1539_NM_001385708.1
mmu-miR-214-3p	mmu_circ_1539_NM_001385708.1
mmu-miR-218-5p	mmu_circ_1539_NM_001385708.1
mmu-miR-22-5p	mmu_circ_1539_NM_001385708.1
mmu-miR-23a-3p	mmu_circ_1539_NM_001385708.1
mmu-miR-23b-5p	mmu_circ_1539_NM_001385708.1
mmu-miR-23b-3p	mmu_circ_1539_NM_001385708.1
mmu-miR-26a-2-3p	mmu_circ_1539_NM_001385708.1
mmu-miR-26b-3p	mmu_circ_1539_NM_001385708.1
mmu-miR-28a-5p	mmu_circ_1539_NM_001385708.1
mmu-miR-298-5p	mmu_circ_1539_NM_001385708.1
mmu-miR-299a-3p	mmu_circ_1539_NM_001385708.1
mmu-miR-29a-5p	mmu_circ_1539_NM_001385708.1
mmu-miR-29b-2-5p	mmu_circ_1539_NM_001385708.1
mmu-miR-301a-5p	mmu_circ_1539_NM_001385708.1
mmu-miR-3074-2-3p	mmu_circ_1539_NM_001385708.1
mmu-miR-3098-3p	mmu_circ_1539_NM_001385708.1
mmu-miR-30a-3p	mmu_circ_1539_NM_001385708.1
mmu-miR-30d-3p	mmu_circ_1539_NM_001385708.1
mmu-miR-30e-3p	mmu_circ_1539_NM_001385708.1
mmu-miR-320-3p	mmu_circ_1539_NM_001385708.1
mmu-miR-322-5p	mmu_circ_1539_NM_001385708.1
mmu-miR-322-3p	mmu_circ_1539_NM_001385708.1
mmu-miR-323-3p	mmu_circ_1539_NM_001385708.1
mmu-miR-330-5p	mmu_circ_1539_NM_001385708.1
mmu-miR-335-3p	mmu_circ_1539_NM_001385708.1
mmu-miR-338-3p	mmu_circ_1539_NM_001385708.1
mmu-miR-340-3p	mmu_circ_1539_NM_001385708.1
mmu-miR-342-3p	mmu_circ_1539_NM_001385708.1
mmu-miR-3470a	mmu_circ_1539_NM_001385708.1
mmu-miR-3470b	mmu_circ_1539_NM_001385708.1
mmu-miR-3473b	mmu_circ_1539_NM_001385708.1
mmu-miR-34a-5p	mmu_circ_1539_NM_001385708.1
mmu-miR-350-5p	mmu_circ_1539_NM_001385708.1
mmu-miR-350-3p	mmu_circ_1539_NM_001385708.1
mmu-miR-362-5p	mmu_circ_1539_NM_001385708.1
mmu-miR-365-1-5p	mmu_circ_1539_NM_001385708.1
mmu-miR-365-2-5p	mmu_circ_1539_NM_001385708.1
mmu-miR-370-3p	mmu_circ_1539_NM_001385708.1
mmu-miR-378a-3p	mmu_circ_1539_NM_001385708.1
mmu-miR-378c	mmu_circ_1539_NM_001385708.1
mmu-miR-378d	mmu_circ_1539_NM_001385708.1
mmu-miR-411-3p	mmu_circ_1539_NM_001385708.1
mmu-miR-425-3p	mmu_circ_1539_NM_001385708.1
mmu-miR-434-3p	mmu_circ_1539_NM_001385708.1
mmu-miR-450b-5p	mmu_circ_1539_NM_001385708.1
mmu-miR-450b-3p	mmu_circ_1539_NM_001385708.1
mmu-miR-455-5p	mmu_circ_1539_NM_001385708.1
mmu-miR-466f-3p	mmu_circ_1539_NM_001385708.1
mmu-miR-466i-5p	mmu_circ_1539_NM_001385708.1
mmu-miR-486a-3p	mmu_circ_1539_NM_001385708.1
mmu-miR-486b-3p	mmu_circ_1539_NM_001385708.1
mmu-miR-490-3p	mmu_circ_1539_NM_001385708.1
mmu-miR-497a-5p	mmu_circ_1539_NM_001385708.1
mmu-miR-497b	mmu_circ_1539_NM_001385708.1
mmu-miR-504-5p	mmu_circ_1539_NM_001385708.1
mmu-miR-511-5p	mmu_circ_1539_NM_001385708.1
mmu-miR-5121	mmu_circ_1539_NM_001385708.1
mmu-miR-532-3p	mmu_circ_1539_NM_001385708.1
mmu-miR-542-5p	mmu_circ_1539_NM_001385708.1
mmu-miR-5615-5p	mmu_circ_1539_NM_001385708.1
mmu-miR-5615-3p	mmu_circ_1539_NM_001385708.1
mmu-miR-574-5p	mmu_circ_1539_NM_001385708.1
mmu-miR-598-3p	mmu_circ_1539_NM_001385708.1
mmu-miR-6516-3p	mmu_circ_1539_NM_001385708.1
mmu-miR-6538	mmu_circ_1539_NM_001385708.1
mmu-miR-664-5p	mmu_circ_1539_NM_001385708.1
mmu-miR-671-5p	mmu_circ_1539_NM_001385708.1
mmu-miR-671-3p	mmu_circ_1539_NM_001385708.1
mmu-miR-674-5p	mmu_circ_1539_NM_001385708.1
mmu-miR-674-3p	mmu_circ_1539_NM_001385708.1
mmu-miR-676-5p	mmu_circ_1539_NM_001385708.1
mmu-miR-676-3p	mmu_circ_1539_NM_001385708.1
mmu-miR-677-5p	mmu_circ_1539_NM_001385708.1
mmu-miR-6944-3p	mmu_circ_1539_NM_001385708.1
mmu-miR-6952-3p	mmu_circ_1539_NM_001385708.1
mmu-miR-6966-3p	mmu_circ_1539_NM_001385708.1
mmu-miR-700-5p	mmu_circ_1539_NM_001385708.1
mmu-miR-7048-3p	mmu_circ_1539_NM_001385708.1
mmu-miR-708-5p	mmu_circ_1539_NM_001385708.1
mmu-miR-709	mmu_circ_1539_NM_001385708.1
mmu-miR-7225-5p	mmu_circ_1539_NM_001385708.1
mmu-miR-770-3p	mmu_circ_1539_NM_001385708.1
mmu-miR-8103	mmu_circ_1539_NM_001385708.1
mmu-miR-8120	mmu_circ_1539_NM_001385708.1
mmu-miR-872-5p	mmu_circ_1539_NM_001385708.1
mmu-miR-874-3p	mmu_circ_1539_NM_001385708.1
mmu-miR-877-5p	mmu_circ_1539_NM_001385708.1
mmu-miR-93-5p	mmu_circ_1539_NM_001385708.1
mmu-miR-93-3p	mmu_circ_1539_NM_001385708.1
novel_13	mmu_circ_1539_NM_001385708.1
novel_20	mmu_circ_1539_NM_001385708.1
novel_23	mmu_circ_1539_NM_001385708.1
novel_31	mmu_circ_1539_NM_001385708.1
novel_33	mmu_circ_1539_NM_001385708.1
novel_49	mmu_circ_1539_NM_001385708.1
novel_59	mmu_circ_1539_NM_001385708.1
novel_6	mmu_circ_1539_NM_001385708.1
mmu-let-7a-2-3p	mmu_circ_1539_NM_011652.3
mmu-miR-12184-3p	mmu_circ_1539_NM_011652.3
mmu-miR-127-5p	mmu_circ_1539_NM_011652.3
mmu-miR-129-5p	mmu_circ_1539_NM_011652.3
mmu-miR-1291	mmu_circ_1539_NM_011652.3
mmu-miR-1306-5p	mmu_circ_1539_NM_011652.3
mmu-miR-130a-3p	mmu_circ_1539_NM_011652.3
mmu-miR-130b-5p	mmu_circ_1539_NM_011652.3
mmu-miR-132-3p	mmu_circ_1539_NM_011652.3
mmu-miR-133a-3p	mmu_circ_1539_NM_011652.3
mmu-miR-133b-3p	mmu_circ_1539_NM_011652.3
mmu-miR-138-5p	mmu_circ_1539_NM_011652.3
mmu-miR-140-5p	mmu_circ_1539_NM_011652.3
mmu-miR-140-3p	mmu_circ_1539_NM_011652.3
mmu-miR-144-5p	mmu_circ_1539_NM_011652.3
mmu-miR-145a-3p	mmu_circ_1539_NM_011652.3
mmu-miR-145a-5p	mmu_circ_1539_NM_011652.3
mmu-miR-148a-5p	mmu_circ_1539_NM_011652.3
mmu-miR-148a-3p	mmu_circ_1539_NM_011652.3
mmu-miR-148b-5p	mmu_circ_1539_NM_011652.3
mmu-miR-149-5p	mmu_circ_1539_NM_011652.3
mmu-miR-150-5p	mmu_circ_1539_NM_011652.3
mmu-miR-151-3p	mmu_circ_1539_NM_011652.3
mmu-miR-152-5p	mmu_circ_1539_NM_011652.3
mmu-miR-15a-5p	mmu_circ_1539_NM_011652.3
mmu-miR-15b-5p	mmu_circ_1539_NM_011652.3
mmu-miR-16-5p	mmu_circ_1539_NM_011652.3
mmu-miR-181a-5p	mmu_circ_1539_NM_011652.3
mmu-miR-181a-1-3p	mmu_circ_1539_NM_011652.3
mmu-miR-181a-2-3p	mmu_circ_1539_NM_011652.3
mmu-miR-181b-5p	mmu_circ_1539_NM_011652.3
mmu-miR-181c-5p	mmu_circ_1539_NM_011652.3
mmu-miR-181c-3p	mmu_circ_1539_NM_011652.3
mmu-miR-181d-5p	mmu_circ_1539_NM_011652.3
mmu-miR-1843b-5p	mmu_circ_1539_NM_011652.3
mmu-miR-187-3p	mmu_circ_1539_NM_011652.3
mmu-miR-191-3p	mmu_circ_1539_NM_011652.3
mmu-miR-1938	mmu_circ_1539_NM_011652.3
mmu-miR-193b-3p	mmu_circ_1539_NM_011652.3
mmu-miR-194-5p	mmu_circ_1539_NM_011652.3
mmu-miR-1943-5p	mmu_circ_1539_NM_011652.3
mmu-miR-195a-5p	mmu_circ_1539_NM_011652.3
mmu-miR-1981-5p	mmu_circ_1539_NM_011652.3
mmu-miR-1983	mmu_circ_1539_NM_011652.3
mmu-miR-199a-5p	mmu_circ_1539_NM_011652.3
mmu-miR-199b-5p	mmu_circ_1539_NM_011652.3
mmu-miR-204-5p	mmu_circ_1539_NM_011652.3
mmu-miR-205-5p	mmu_circ_1539_NM_011652.3
mmu-miR-208a-5p	mmu_circ_1539_NM_011652.3
mmu-miR-208b-5p	mmu_circ_1539_NM_011652.3
mmu-miR-212-5p	mmu_circ_1539_NM_011652.3
mmu-miR-214-3p	mmu_circ_1539_NM_011652.3
mmu-miR-218-5p	mmu_circ_1539_NM_011652.3
mmu-miR-22-5p	mmu_circ_1539_NM_011652.3
mmu-miR-23a-3p	mmu_circ_1539_NM_011652.3
mmu-miR-23b-5p	mmu_circ_1539_NM_011652.3
mmu-miR-23b-3p	mmu_circ_1539_NM_011652.3
mmu-miR-26a-2-3p	mmu_circ_1539_NM_011652.3
mmu-miR-26b-3p	mmu_circ_1539_NM_011652.3
mmu-miR-28a-5p	mmu_circ_1539_NM_011652.3
mmu-miR-298-5p	mmu_circ_1539_NM_011652.3
mmu-miR-299a-3p	mmu_circ_1539_NM_011652.3
mmu-miR-29a-5p	mmu_circ_1539_NM_011652.3
mmu-miR-29b-2-5p	mmu_circ_1539_NM_011652.3
mmu-miR-301a-5p	mmu_circ_1539_NM_011652.3
mmu-miR-3074-2-3p	mmu_circ_1539_NM_011652.3
mmu-miR-3098-3p	mmu_circ_1539_NM_011652.3
mmu-miR-30a-3p	mmu_circ_1539_NM_011652.3
mmu-miR-30d-3p	mmu_circ_1539_NM_011652.3
mmu-miR-30e-3p	mmu_circ_1539_NM_011652.3
mmu-miR-320-3p	mmu_circ_1539_NM_011652.3
mmu-miR-322-5p	mmu_circ_1539_NM_011652.3
mmu-miR-322-3p	mmu_circ_1539_NM_011652.3
mmu-miR-323-3p	mmu_circ_1539_NM_011652.3
mmu-miR-330-5p	mmu_circ_1539_NM_011652.3
mmu-miR-335-3p	mmu_circ_1539_NM_011652.3
mmu-miR-338-3p	mmu_circ_1539_NM_011652.3
mmu-miR-340-3p	mmu_circ_1539_NM_011652.3
mmu-miR-342-3p	mmu_circ_1539_NM_011652.3
mmu-miR-3470a	mmu_circ_1539_NM_011652.3
mmu-miR-3470b	mmu_circ_1539_NM_011652.3
mmu-miR-3473b	mmu_circ_1539_NM_011652.3
mmu-miR-34a-5p	mmu_circ_1539_NM_011652.3
mmu-miR-350-5p	mmu_circ_1539_NM_011652.3
mmu-miR-350-3p	mmu_circ_1539_NM_011652.3
mmu-miR-362-5p	mmu_circ_1539_NM_011652.3
mmu-miR-365-1-5p	mmu_circ_1539_NM_011652.3
mmu-miR-365-2-5p	mmu_circ_1539_NM_011652.3
mmu-miR-370-3p	mmu_circ_1539_NM_011652.3
mmu-miR-378a-3p	mmu_circ_1539_NM_011652.3
mmu-miR-378c	mmu_circ_1539_NM_011652.3
mmu-miR-378d	mmu_circ_1539_NM_011652.3
mmu-miR-410-3p	mmu_circ_1539_NM_011652.3
mmu-miR-411-3p	mmu_circ_1539_NM_011652.3
mmu-miR-425-3p	mmu_circ_1539_NM_011652.3
mmu-miR-434-3p	mmu_circ_1539_NM_011652.3
mmu-miR-450b-5p	mmu_circ_1539_NM_011652.3
mmu-miR-450b-3p	mmu_circ_1539_NM_011652.3
mmu-miR-455-5p	mmu_circ_1539_NM_011652.3
mmu-miR-466f-3p	mmu_circ_1539_NM_011652.3
mmu-miR-466i-5p	mmu_circ_1539_NM_011652.3
mmu-miR-486a-3p	mmu_circ_1539_NM_011652.3
mmu-miR-486b-3p	mmu_circ_1539_NM_011652.3
mmu-miR-490-3p	mmu_circ_1539_NM_011652.3
mmu-miR-497a-5p	mmu_circ_1539_NM_011652.3
mmu-miR-497b	mmu_circ_1539_NM_011652.3
mmu-miR-504-5p	mmu_circ_1539_NM_011652.3
mmu-miR-511-5p	mmu_circ_1539_NM_011652.3
mmu-miR-5121	mmu_circ_1539_NM_011652.3
mmu-miR-532-3p	mmu_circ_1539_NM_011652.3
mmu-miR-542-5p	mmu_circ_1539_NM_011652.3
mmu-miR-5615-5p	mmu_circ_1539_NM_011652.3
mmu-miR-5615-3p	mmu_circ_1539_NM_011652.3
mmu-miR-574-5p	mmu_circ_1539_NM_011652.3
mmu-miR-598-3p	mmu_circ_1539_NM_011652.3
mmu-miR-6516-3p	mmu_circ_1539_NM_011652.3
mmu-miR-6538	mmu_circ_1539_NM_011652.3
mmu-miR-664-5p	mmu_circ_1539_NM_011652.3
mmu-miR-671-5p	mmu_circ_1539_NM_011652.3
mmu-miR-671-3p	mmu_circ_1539_NM_011652.3
mmu-miR-674-5p	mmu_circ_1539_NM_011652.3
mmu-miR-674-3p	mmu_circ_1539_NM_011652.3
mmu-miR-676-5p	mmu_circ_1539_NM_011652.3
mmu-miR-676-3p	mmu_circ_1539_NM_011652.3
mmu-miR-677-5p	mmu_circ_1539_NM_011652.3
mmu-miR-6944-3p	mmu_circ_1539_NM_011652.3
mmu-miR-6952-3p	mmu_circ_1539_NM_011652.3
mmu-miR-6966-3p	mmu_circ_1539_NM_011652.3
mmu-miR-700-5p	mmu_circ_1539_NM_011652.3
mmu-miR-7048-3p	mmu_circ_1539_NM_011652.3
mmu-miR-708-5p	mmu_circ_1539_NM_011652.3
mmu-miR-709	mmu_circ_1539_NM_011652.3
mmu-miR-7225-5p	mmu_circ_1539_NM_011652.3
mmu-miR-770-3p	mmu_circ_1539_NM_011652.3
mmu-miR-8103	mmu_circ_1539_NM_011652.3
mmu-miR-8120	mmu_circ_1539_NM_011652.3
mmu-miR-872-5p	mmu_circ_1539_NM_011652.3
mmu-miR-874-3p	mmu_circ_1539_NM_011652.3
mmu-miR-877-5p	mmu_circ_1539_NM_011652.3
mmu-miR-93-5p	mmu_circ_1539_NM_011652.3
mmu-miR-93-3p	mmu_circ_1539_NM_011652.3
novel_13	mmu_circ_1539_NM_011652.3
novel_20	mmu_circ_1539_NM_011652.3
novel_23	mmu_circ_1539_NM_011652.3
novel_31	mmu_circ_1539_NM_011652.3
novel_33	mmu_circ_1539_NM_011652.3
novel_49	mmu_circ_1539_NM_011652.3
novel_59	mmu_circ_1539_NM_011652.3
novel_6	mmu_circ_1539_NM_011652.3
mmu-let-7a-2-3p	mmu_circ_1539_XM_036160535.1
mmu-miR-12184-3p	mmu_circ_1539_XM_036160535.1
mmu-miR-127-5p	mmu_circ_1539_XM_036160535.1
mmu-miR-129-5p	mmu_circ_1539_XM_036160535.1
mmu-miR-1291	mmu_circ_1539_XM_036160535.1
mmu-miR-1306-5p	mmu_circ_1539_XM_036160535.1
mmu-miR-130a-3p	mmu_circ_1539_XM_036160535.1
mmu-miR-130b-5p	mmu_circ_1539_XM_036160535.1
mmu-miR-132-3p	mmu_circ_1539_XM_036160535.1
mmu-miR-133a-3p	mmu_circ_1539_XM_036160535.1
mmu-miR-133b-3p	mmu_circ_1539_XM_036160535.1
mmu-miR-138-5p	mmu_circ_1539_XM_036160535.1
mmu-miR-140-5p	mmu_circ_1539_XM_036160535.1
mmu-miR-140-3p	mmu_circ_1539_XM_036160535.1
mmu-miR-144-5p	mmu_circ_1539_XM_036160535.1
mmu-miR-145a-3p	mmu_circ_1539_XM_036160535.1
mmu-miR-145a-5p	mmu_circ_1539_XM_036160535.1
mmu-miR-148a-5p	mmu_circ_1539_XM_036160535.1
mmu-miR-148a-3p	mmu_circ_1539_XM_036160535.1
mmu-miR-148b-5p	mmu_circ_1539_XM_036160535.1
mmu-miR-149-5p	mmu_circ_1539_XM_036160535.1
mmu-miR-150-5p	mmu_circ_1539_XM_036160535.1
mmu-miR-151-3p	mmu_circ_1539_XM_036160535.1
mmu-miR-152-5p	mmu_circ_1539_XM_036160535.1
mmu-miR-15a-5p	mmu_circ_1539_XM_036160535.1
mmu-miR-15b-5p	mmu_circ_1539_XM_036160535.1
mmu-miR-16-5p	mmu_circ_1539_XM_036160535.1
mmu-miR-181a-5p	mmu_circ_1539_XM_036160535.1
mmu-miR-181a-1-3p	mmu_circ_1539_XM_036160535.1
mmu-miR-181a-2-3p	mmu_circ_1539_XM_036160535.1
mmu-miR-181b-5p	mmu_circ_1539_XM_036160535.1
mmu-miR-181c-5p	mmu_circ_1539_XM_036160535.1
mmu-miR-181c-3p	mmu_circ_1539_XM_036160535.1
mmu-miR-181d-5p	mmu_circ_1539_XM_036160535.1
mmu-miR-1843b-5p	mmu_circ_1539_XM_036160535.1
mmu-miR-187-3p	mmu_circ_1539_XM_036160535.1
mmu-miR-191-3p	mmu_circ_1539_XM_036160535.1
mmu-miR-1938	mmu_circ_1539_XM_036160535.1
mmu-miR-193b-3p	mmu_circ_1539_XM_036160535.1
mmu-miR-194-5p	mmu_circ_1539_XM_036160535.1
mmu-miR-1943-5p	mmu_circ_1539_XM_036160535.1
mmu-miR-195a-5p	mmu_circ_1539_XM_036160535.1
mmu-miR-1981-5p	mmu_circ_1539_XM_036160535.1
mmu-miR-1983	mmu_circ_1539_XM_036160535.1
mmu-miR-199a-5p	mmu_circ_1539_XM_036160535.1
mmu-miR-199b-5p	mmu_circ_1539_XM_036160535.1
mmu-miR-204-5p	mmu_circ_1539_XM_036160535.1
mmu-miR-205-5p	mmu_circ_1539_XM_036160535.1
mmu-miR-208a-5p	mmu_circ_1539_XM_036160535.1
mmu-miR-208b-5p	mmu_circ_1539_XM_036160535.1
mmu-miR-212-5p	mmu_circ_1539_XM_036160535.1
mmu-miR-214-3p	mmu_circ_1539_XM_036160535.1
mmu-miR-218-5p	mmu_circ_1539_XM_036160535.1
mmu-miR-22-5p	mmu_circ_1539_XM_036160535.1
mmu-miR-23a-3p	mmu_circ_1539_XM_036160535.1
mmu-miR-23b-5p	mmu_circ_1539_XM_036160535.1
mmu-miR-23b-3p	mmu_circ_1539_XM_036160535.1
mmu-miR-26a-2-3p	mmu_circ_1539_XM_036160535.1
mmu-miR-26b-3p	mmu_circ_1539_XM_036160535.1
mmu-miR-28a-5p	mmu_circ_1539_XM_036160535.1
mmu-miR-298-5p	mmu_circ_1539_XM_036160535.1
mmu-miR-299a-3p	mmu_circ_1539_XM_036160535.1
mmu-miR-29a-5p	mmu_circ_1539_XM_036160535.1
mmu-miR-29b-2-5p	mmu_circ_1539_XM_036160535.1
mmu-miR-301a-5p	mmu_circ_1539_XM_036160535.1
mmu-miR-3074-2-3p	mmu_circ_1539_XM_036160535.1
mmu-miR-3098-3p	mmu_circ_1539_XM_036160535.1
mmu-miR-30a-3p	mmu_circ_1539_XM_036160535.1
mmu-miR-30d-3p	mmu_circ_1539_XM_036160535.1
mmu-miR-30e-3p	mmu_circ_1539_XM_036160535.1
mmu-miR-320-3p	mmu_circ_1539_XM_036160535.1
mmu-miR-322-5p	mmu_circ_1539_XM_036160535.1
mmu-miR-322-3p	mmu_circ_1539_XM_036160535.1
mmu-miR-323-3p	mmu_circ_1539_XM_036160535.1
mmu-miR-330-5p	mmu_circ_1539_XM_036160535.1
mmu-miR-335-3p	mmu_circ_1539_XM_036160535.1
mmu-miR-338-3p	mmu_circ_1539_XM_036160535.1
mmu-miR-340-3p	mmu_circ_1539_XM_036160535.1
mmu-miR-342-3p	mmu_circ_1539_XM_036160535.1
mmu-miR-3470a	mmu_circ_1539_XM_036160535.1
mmu-miR-3470b	mmu_circ_1539_XM_036160535.1
mmu-miR-3473b	mmu_circ_1539_XM_036160535.1
mmu-miR-34a-5p	mmu_circ_1539_XM_036160535.1
mmu-miR-350-5p	mmu_circ_1539_XM_036160535.1
mmu-miR-350-3p	mmu_circ_1539_XM_036160535.1
mmu-miR-362-5p	mmu_circ_1539_XM_036160535.1
mmu-miR-365-1-5p	mmu_circ_1539_XM_036160535.1
mmu-miR-365-2-5p	mmu_circ_1539_XM_036160535.1
mmu-miR-370-3p	mmu_circ_1539_XM_036160535.1
mmu-miR-378a-3p	mmu_circ_1539_XM_036160535.1
mmu-miR-378c	mmu_circ_1539_XM_036160535.1
mmu-miR-378d	mmu_circ_1539_XM_036160535.1
mmu-miR-411-3p	mmu_circ_1539_XM_036160535.1
mmu-miR-425-3p	mmu_circ_1539_XM_036160535.1
mmu-miR-434-3p	mmu_circ_1539_XM_036160535.1
mmu-miR-450b-5p	mmu_circ_1539_XM_036160535.1
mmu-miR-450b-3p	mmu_circ_1539_XM_036160535.1
mmu-miR-455-5p	mmu_circ_1539_XM_036160535.1
mmu-miR-466f-3p	mmu_circ_1539_XM_036160535.1
mmu-miR-466i-5p	mmu_circ_1539_XM_036160535.1
mmu-miR-486a-3p	mmu_circ_1539_XM_036160535.1
mmu-miR-486b-3p	mmu_circ_1539_XM_036160535.1
mmu-miR-490-3p	mmu_circ_1539_XM_036160535.1
mmu-miR-497a-5p	mmu_circ_1539_XM_036160535.1
mmu-miR-497b	mmu_circ_1539_XM_036160535.1
mmu-miR-504-5p	mmu_circ_1539_XM_036160535.1
mmu-miR-511-5p	mmu_circ_1539_XM_036160535.1
mmu-miR-5121	mmu_circ_1539_XM_036160535.1
mmu-miR-532-3p	mmu_circ_1539_XM_036160535.1
mmu-miR-542-5p	mmu_circ_1539_XM_036160535.1
mmu-miR-5615-5p	mmu_circ_1539_XM_036160535.1
mmu-miR-5615-3p	mmu_circ_1539_XM_036160535.1
mmu-miR-574-5p	mmu_circ_1539_XM_036160535.1
mmu-miR-598-3p	mmu_circ_1539_XM_036160535.1
mmu-miR-6516-3p	mmu_circ_1539_XM_036160535.1
mmu-miR-6538	mmu_circ_1539_XM_036160535.1
mmu-miR-664-5p	mmu_circ_1539_XM_036160535.1
mmu-miR-671-5p	mmu_circ_1539_XM_036160535.1
mmu-miR-671-3p	mmu_circ_1539_XM_036160535.1
mmu-miR-674-5p	mmu_circ_1539_XM_036160535.1
mmu-miR-674-3p	mmu_circ_1539_XM_036160535.1
mmu-miR-676-5p	mmu_circ_1539_XM_036160535.1
mmu-miR-676-3p	mmu_circ_1539_XM_036160535.1
mmu-miR-677-5p	mmu_circ_1539_XM_036160535.1
mmu-miR-6944-3p	mmu_circ_1539_XM_036160535.1
mmu-miR-6952-3p	mmu_circ_1539_XM_036160535.1
mmu-miR-6966-3p	mmu_circ_1539_XM_036160535.1
mmu-miR-700-5p	mmu_circ_1539_XM_036160535.1
mmu-miR-7048-3p	mmu_circ_1539_XM_036160535.1
mmu-miR-708-5p	mmu_circ_1539_XM_036160535.1
mmu-miR-709	mmu_circ_1539_XM_036160535.1
mmu-miR-7225-5p	mmu_circ_1539_XM_036160535.1
mmu-miR-770-3p	mmu_circ_1539_XM_036160535.1
mmu-miR-8103	mmu_circ_1539_XM_036160535.1
mmu-miR-8120	mmu_circ_1539_XM_036160535.1
mmu-miR-872-5p	mmu_circ_1539_XM_036160535.1
mmu-miR-874-3p	mmu_circ_1539_XM_036160535.1
mmu-miR-877-5p	mmu_circ_1539_XM_036160535.1
mmu-miR-93-5p	mmu_circ_1539_XM_036160535.1
mmu-miR-93-3p	mmu_circ_1539_XM_036160535.1
novel_13	mmu_circ_1539_XM_036160535.1
novel_20	mmu_circ_1539_XM_036160535.1
novel_23	mmu_circ_1539_XM_036160535.1
novel_31	mmu_circ_1539_XM_036160535.1
novel_33	mmu_circ_1539_XM_036160535.1
novel_49	mmu_circ_1539_XM_036160535.1
novel_59	mmu_circ_1539_XM_036160535.1
novel_6	mmu_circ_1539_XM_036160535.1
mmu-let-7a-2-3p	mmu_circ_1539_XM_036160536.1
mmu-miR-12184-3p	mmu_circ_1539_XM_036160536.1
mmu-miR-127-5p	mmu_circ_1539_XM_036160536.1
mmu-miR-129-5p	mmu_circ_1539_XM_036160536.1
mmu-miR-1291	mmu_circ_1539_XM_036160536.1
mmu-miR-1306-5p	mmu_circ_1539_XM_036160536.1
mmu-miR-130a-3p	mmu_circ_1539_XM_036160536.1
mmu-miR-130b-5p	mmu_circ_1539_XM_036160536.1
mmu-miR-132-3p	mmu_circ_1539_XM_036160536.1
mmu-miR-133a-3p	mmu_circ_1539_XM_036160536.1
mmu-miR-133b-3p	mmu_circ_1539_XM_036160536.1
mmu-miR-138-5p	mmu_circ_1539_XM_036160536.1
mmu-miR-140-5p	mmu_circ_1539_XM_036160536.1
mmu-miR-140-3p	mmu_circ_1539_XM_036160536.1
mmu-miR-144-5p	mmu_circ_1539_XM_036160536.1
mmu-miR-145a-3p	mmu_circ_1539_XM_036160536.1
mmu-miR-145a-5p	mmu_circ_1539_XM_036160536.1
mmu-miR-148a-5p	mmu_circ_1539_XM_036160536.1
mmu-miR-148a-3p	mmu_circ_1539_XM_036160536.1
mmu-miR-148b-5p	mmu_circ_1539_XM_036160536.1
mmu-miR-149-5p	mmu_circ_1539_XM_036160536.1
mmu-miR-150-5p	mmu_circ_1539_XM_036160536.1
mmu-miR-151-3p	mmu_circ_1539_XM_036160536.1
mmu-miR-152-5p	mmu_circ_1539_XM_036160536.1
mmu-miR-15a-5p	mmu_circ_1539_XM_036160536.1
mmu-miR-15b-5p	mmu_circ_1539_XM_036160536.1
mmu-miR-16-5p	mmu_circ_1539_XM_036160536.1
mmu-miR-181a-5p	mmu_circ_1539_XM_036160536.1
mmu-miR-181a-1-3p	mmu_circ_1539_XM_036160536.1
mmu-miR-181a-2-3p	mmu_circ_1539_XM_036160536.1
mmu-miR-181b-5p	mmu_circ_1539_XM_036160536.1
mmu-miR-181c-5p	mmu_circ_1539_XM_036160536.1
mmu-miR-181c-3p	mmu_circ_1539_XM_036160536.1
mmu-miR-181d-5p	mmu_circ_1539_XM_036160536.1
mmu-miR-1843b-5p	mmu_circ_1539_XM_036160536.1
mmu-miR-187-3p	mmu_circ_1539_XM_036160536.1
mmu-miR-191-3p	mmu_circ_1539_XM_036160536.1
mmu-miR-1938	mmu_circ_1539_XM_036160536.1
mmu-miR-193b-3p	mmu_circ_1539_XM_036160536.1
mmu-miR-194-5p	mmu_circ_1539_XM_036160536.1
mmu-miR-1943-5p	mmu_circ_1539_XM_036160536.1
mmu-miR-195a-5p	mmu_circ_1539_XM_036160536.1
mmu-miR-1981-5p	mmu_circ_1539_XM_036160536.1
mmu-miR-1983	mmu_circ_1539_XM_036160536.1
mmu-miR-199a-5p	mmu_circ_1539_XM_036160536.1
mmu-miR-199b-5p	mmu_circ_1539_XM_036160536.1
mmu-miR-204-5p	mmu_circ_1539_XM_036160536.1
mmu-miR-205-5p	mmu_circ_1539_XM_036160536.1
mmu-miR-208a-5p	mmu_circ_1539_XM_036160536.1
mmu-miR-208b-5p	mmu_circ_1539_XM_036160536.1
mmu-miR-212-5p	mmu_circ_1539_XM_036160536.1
mmu-miR-214-3p	mmu_circ_1539_XM_036160536.1
mmu-miR-218-5p	mmu_circ_1539_XM_036160536.1
mmu-miR-22-5p	mmu_circ_1539_XM_036160536.1
mmu-miR-23a-3p	mmu_circ_1539_XM_036160536.1
mmu-miR-23b-5p	mmu_circ_1539_XM_036160536.1
mmu-miR-23b-3p	mmu_circ_1539_XM_036160536.1
mmu-miR-26a-2-3p	mmu_circ_1539_XM_036160536.1
mmu-miR-26b-3p	mmu_circ_1539_XM_036160536.1
mmu-miR-28a-5p	mmu_circ_1539_XM_036160536.1
mmu-miR-298-5p	mmu_circ_1539_XM_036160536.1
mmu-miR-299a-3p	mmu_circ_1539_XM_036160536.1
mmu-miR-29a-5p	mmu_circ_1539_XM_036160536.1
mmu-miR-29b-2-5p	mmu_circ_1539_XM_036160536.1
mmu-miR-301a-5p	mmu_circ_1539_XM_036160536.1
mmu-miR-3074-2-3p	mmu_circ_1539_XM_036160536.1
mmu-miR-3098-3p	mmu_circ_1539_XM_036160536.1
mmu-miR-30a-3p	mmu_circ_1539_XM_036160536.1
mmu-miR-30d-3p	mmu_circ_1539_XM_036160536.1
mmu-miR-30e-3p	mmu_circ_1539_XM_036160536.1
mmu-miR-320-3p	mmu_circ_1539_XM_036160536.1
mmu-miR-322-5p	mmu_circ_1539_XM_036160536.1
mmu-miR-322-3p	mmu_circ_1539_XM_036160536.1
mmu-miR-323-3p	mmu_circ_1539_XM_036160536.1
mmu-miR-330-5p	mmu_circ_1539_XM_036160536.1
mmu-miR-335-3p	mmu_circ_1539_XM_036160536.1
mmu-miR-338-3p	mmu_circ_1539_XM_036160536.1
mmu-miR-340-3p	mmu_circ_1539_XM_036160536.1
mmu-miR-342-3p	mmu_circ_1539_XM_036160536.1
mmu-miR-3470a	mmu_circ_1539_XM_036160536.1
mmu-miR-3470b	mmu_circ_1539_XM_036160536.1
mmu-miR-3473b	mmu_circ_1539_XM_036160536.1
mmu-miR-34a-5p	mmu_circ_1539_XM_036160536.1
mmu-miR-350-5p	mmu_circ_1539_XM_036160536.1
mmu-miR-350-3p	mmu_circ_1539_XM_036160536.1
mmu-miR-362-5p	mmu_circ_1539_XM_036160536.1
mmu-miR-365-1-5p	mmu_circ_1539_XM_036160536.1
mmu-miR-365-2-5p	mmu_circ_1539_XM_036160536.1
mmu-miR-370-3p	mmu_circ_1539_XM_036160536.1
mmu-miR-378a-3p	mmu_circ_1539_XM_036160536.1
mmu-miR-378c	mmu_circ_1539_XM_036160536.1
mmu-miR-378d	mmu_circ_1539_XM_036160536.1
mmu-miR-411-3p	mmu_circ_1539_XM_036160536.1
mmu-miR-425-3p	mmu_circ_1539_XM_036160536.1
mmu-miR-434-3p	mmu_circ_1539_XM_036160536.1
mmu-miR-450b-5p	mmu_circ_1539_XM_036160536.1
mmu-miR-450b-3p	mmu_circ_1539_XM_036160536.1
mmu-miR-466f-3p	mmu_circ_1539_XM_036160536.1
mmu-miR-466i-5p	mmu_circ_1539_XM_036160536.1
mmu-miR-486a-3p	mmu_circ_1539_XM_036160536.1
mmu-miR-486b-3p	mmu_circ_1539_XM_036160536.1
mmu-miR-490-3p	mmu_circ_1539_XM_036160536.1
mmu-miR-497a-5p	mmu_circ_1539_XM_036160536.1
mmu-miR-497b	mmu_circ_1539_XM_036160536.1
mmu-miR-504-5p	mmu_circ_1539_XM_036160536.1
mmu-miR-511-5p	mmu_circ_1539_XM_036160536.1
mmu-miR-5121	mmu_circ_1539_XM_036160536.1
mmu-miR-532-3p	mmu_circ_1539_XM_036160536.1
mmu-miR-542-5p	mmu_circ_1539_XM_036160536.1
mmu-miR-5615-5p	mmu_circ_1539_XM_036160536.1
mmu-miR-5615-3p	mmu_circ_1539_XM_036160536.1
mmu-miR-574-5p	mmu_circ_1539_XM_036160536.1
mmu-miR-598-3p	mmu_circ_1539_XM_036160536.1
mmu-miR-6516-3p	mmu_circ_1539_XM_036160536.1
mmu-miR-6538	mmu_circ_1539_XM_036160536.1
mmu-miR-664-5p	mmu_circ_1539_XM_036160536.1
mmu-miR-671-5p	mmu_circ_1539_XM_036160536.1
mmu-miR-671-3p	mmu_circ_1539_XM_036160536.1
mmu-miR-674-5p	mmu_circ_1539_XM_036160536.1
mmu-miR-674-3p	mmu_circ_1539_XM_036160536.1
mmu-miR-676-5p	mmu_circ_1539_XM_036160536.1
mmu-miR-676-3p	mmu_circ_1539_XM_036160536.1
mmu-miR-677-5p	mmu_circ_1539_XM_036160536.1
mmu-miR-6944-3p	mmu_circ_1539_XM_036160536.1
mmu-miR-6952-3p	mmu_circ_1539_XM_036160536.1
mmu-miR-6966-3p	mmu_circ_1539_XM_036160536.1
mmu-miR-700-5p	mmu_circ_1539_XM_036160536.1
mmu-miR-7048-3p	mmu_circ_1539_XM_036160536.1
mmu-miR-708-5p	mmu_circ_1539_XM_036160536.1
mmu-miR-709	mmu_circ_1539_XM_036160536.1
mmu-miR-7225-5p	mmu_circ_1539_XM_036160536.1
mmu-miR-770-3p	mmu_circ_1539_XM_036160536.1
mmu-miR-8103	mmu_circ_1539_XM_036160536.1
mmu-miR-8120	mmu_circ_1539_XM_036160536.1
mmu-miR-872-5p	mmu_circ_1539_XM_036160536.1
mmu-miR-874-3p	mmu_circ_1539_XM_036160536.1
mmu-miR-877-5p	mmu_circ_1539_XM_036160536.1
mmu-miR-93-5p	mmu_circ_1539_XM_036160536.1
mmu-miR-93-3p	mmu_circ_1539_XM_036160536.1
novel_13	mmu_circ_1539_XM_036160536.1
novel_20	mmu_circ_1539_XM_036160536.1
novel_23	mmu_circ_1539_XM_036160536.1
novel_31	mmu_circ_1539_XM_036160536.1
novel_33	mmu_circ_1539_XM_036160536.1
novel_49	mmu_circ_1539_XM_036160536.1
novel_59	mmu_circ_1539_XM_036160536.1
novel_6	mmu_circ_1539_XM_036160536.1
mmu-let-7a-2-3p	mmu_circ_1539_XM_036160537.1
mmu-miR-12184-3p	mmu_circ_1539_XM_036160537.1
mmu-miR-127-5p	mmu_circ_1539_XM_036160537.1
mmu-miR-129-5p	mmu_circ_1539_XM_036160537.1
mmu-miR-1291	mmu_circ_1539_XM_036160537.1
mmu-miR-130a-3p	mmu_circ_1539_XM_036160537.1
mmu-miR-130b-5p	mmu_circ_1539_XM_036160537.1
mmu-miR-132-3p	mmu_circ_1539_XM_036160537.1
mmu-miR-133a-3p	mmu_circ_1539_XM_036160537.1
mmu-miR-133b-3p	mmu_circ_1539_XM_036160537.1
mmu-miR-138-5p	mmu_circ_1539_XM_036160537.1
mmu-miR-140-5p	mmu_circ_1539_XM_036160537.1
mmu-miR-140-3p	mmu_circ_1539_XM_036160537.1
mmu-miR-144-5p	mmu_circ_1539_XM_036160537.1
mmu-miR-145a-3p	mmu_circ_1539_XM_036160537.1
mmu-miR-145a-5p	mmu_circ_1539_XM_036160537.1
mmu-miR-148a-5p	mmu_circ_1539_XM_036160537.1
mmu-miR-148a-3p	mmu_circ_1539_XM_036160537.1
mmu-miR-148b-5p	mmu_circ_1539_XM_036160537.1
mmu-miR-149-5p	mmu_circ_1539_XM_036160537.1
mmu-miR-150-5p	mmu_circ_1539_XM_036160537.1
mmu-miR-151-3p	mmu_circ_1539_XM_036160537.1
mmu-miR-15a-5p	mmu_circ_1539_XM_036160537.1
mmu-miR-15b-5p	mmu_circ_1539_XM_036160537.1
mmu-miR-16-5p	mmu_circ_1539_XM_036160537.1
mmu-miR-181a-5p	mmu_circ_1539_XM_036160537.1
mmu-miR-181a-1-3p	mmu_circ_1539_XM_036160537.1
mmu-miR-181a-2-3p	mmu_circ_1539_XM_036160537.1
mmu-miR-181b-5p	mmu_circ_1539_XM_036160537.1
mmu-miR-181c-5p	mmu_circ_1539_XM_036160537.1
mmu-miR-181c-3p	mmu_circ_1539_XM_036160537.1
mmu-miR-181d-5p	mmu_circ_1539_XM_036160537.1
mmu-miR-1843b-5p	mmu_circ_1539_XM_036160537.1
mmu-miR-187-3p	mmu_circ_1539_XM_036160537.1
mmu-miR-191-3p	mmu_circ_1539_XM_036160537.1
mmu-miR-1938	mmu_circ_1539_XM_036160537.1
mmu-miR-193b-3p	mmu_circ_1539_XM_036160537.1
mmu-miR-194-5p	mmu_circ_1539_XM_036160537.1
mmu-miR-1943-5p	mmu_circ_1539_XM_036160537.1
mmu-miR-195a-5p	mmu_circ_1539_XM_036160537.1
mmu-miR-1981-5p	mmu_circ_1539_XM_036160537.1
mmu-miR-1983	mmu_circ_1539_XM_036160537.1
mmu-miR-199a-5p	mmu_circ_1539_XM_036160537.1
mmu-miR-199b-5p	mmu_circ_1539_XM_036160537.1
mmu-miR-204-5p	mmu_circ_1539_XM_036160537.1
mmu-miR-205-5p	mmu_circ_1539_XM_036160537.1
mmu-miR-208a-5p	mmu_circ_1539_XM_036160537.1
mmu-miR-208b-5p	mmu_circ_1539_XM_036160537.1
mmu-miR-212-5p	mmu_circ_1539_XM_036160537.1
mmu-miR-214-3p	mmu_circ_1539_XM_036160537.1
mmu-miR-218-5p	mmu_circ_1539_XM_036160537.1
mmu-miR-22-5p	mmu_circ_1539_XM_036160537.1
mmu-miR-23a-3p	mmu_circ_1539_XM_036160537.1
mmu-miR-23b-5p	mmu_circ_1539_XM_036160537.1
mmu-miR-23b-3p	mmu_circ_1539_XM_036160537.1
mmu-miR-26a-2-3p	mmu_circ_1539_XM_036160537.1
mmu-miR-26b-3p	mmu_circ_1539_XM_036160537.1
mmu-miR-299a-3p	mmu_circ_1539_XM_036160537.1
mmu-miR-29a-5p	mmu_circ_1539_XM_036160537.1
mmu-miR-29b-2-5p	mmu_circ_1539_XM_036160537.1
mmu-miR-301a-5p	mmu_circ_1539_XM_036160537.1
mmu-miR-3074-2-3p	mmu_circ_1539_XM_036160537.1
mmu-miR-3098-3p	mmu_circ_1539_XM_036160537.1
mmu-miR-30a-3p	mmu_circ_1539_XM_036160537.1
mmu-miR-30d-3p	mmu_circ_1539_XM_036160537.1
mmu-miR-30e-3p	mmu_circ_1539_XM_036160537.1
mmu-miR-320-3p	mmu_circ_1539_XM_036160537.1
mmu-miR-322-5p	mmu_circ_1539_XM_036160537.1
mmu-miR-322-3p	mmu_circ_1539_XM_036160537.1
mmu-miR-323-3p	mmu_circ_1539_XM_036160537.1
mmu-miR-330-5p	mmu_circ_1539_XM_036160537.1
mmu-miR-335-3p	mmu_circ_1539_XM_036160537.1
mmu-miR-338-3p	mmu_circ_1539_XM_036160537.1
mmu-miR-340-3p	mmu_circ_1539_XM_036160537.1
mmu-miR-342-3p	mmu_circ_1539_XM_036160537.1
mmu-miR-3470a	mmu_circ_1539_XM_036160537.1
mmu-miR-3470b	mmu_circ_1539_XM_036160537.1
mmu-miR-3473b	mmu_circ_1539_XM_036160537.1
mmu-miR-34a-5p	mmu_circ_1539_XM_036160537.1
mmu-miR-350-3p	mmu_circ_1539_XM_036160537.1
mmu-miR-362-5p	mmu_circ_1539_XM_036160537.1
mmu-miR-370-3p	mmu_circ_1539_XM_036160537.1
mmu-miR-378a-3p	mmu_circ_1539_XM_036160537.1
mmu-miR-378c	mmu_circ_1539_XM_036160537.1
mmu-miR-378d	mmu_circ_1539_XM_036160537.1
mmu-miR-411-3p	mmu_circ_1539_XM_036160537.1
mmu-miR-425-3p	mmu_circ_1539_XM_036160537.1
mmu-miR-434-3p	mmu_circ_1539_XM_036160537.1
mmu-miR-450b-5p	mmu_circ_1539_XM_036160537.1
mmu-miR-450b-3p	mmu_circ_1539_XM_036160537.1
mmu-miR-466f-3p	mmu_circ_1539_XM_036160537.1
mmu-miR-466i-5p	mmu_circ_1539_XM_036160537.1
mmu-miR-486a-3p	mmu_circ_1539_XM_036160537.1
mmu-miR-486b-3p	mmu_circ_1539_XM_036160537.1
mmu-miR-490-3p	mmu_circ_1539_XM_036160537.1
mmu-miR-497a-5p	mmu_circ_1539_XM_036160537.1
mmu-miR-497b	mmu_circ_1539_XM_036160537.1
mmu-miR-504-5p	mmu_circ_1539_XM_036160537.1
mmu-miR-511-5p	mmu_circ_1539_XM_036160537.1
mmu-miR-5121	mmu_circ_1539_XM_036160537.1
mmu-miR-532-3p	mmu_circ_1539_XM_036160537.1
mmu-miR-542-5p	mmu_circ_1539_XM_036160537.1
mmu-miR-5615-5p	mmu_circ_1539_XM_036160537.1
mmu-miR-5615-3p	mmu_circ_1539_XM_036160537.1
mmu-miR-574-5p	mmu_circ_1539_XM_036160537.1
mmu-miR-598-3p	mmu_circ_1539_XM_036160537.1
mmu-miR-6516-3p	mmu_circ_1539_XM_036160537.1
mmu-miR-6538	mmu_circ_1539_XM_036160537.1
mmu-miR-664-5p	mmu_circ_1539_XM_036160537.1
mmu-miR-671-5p	mmu_circ_1539_XM_036160537.1
mmu-miR-671-3p	mmu_circ_1539_XM_036160537.1
mmu-miR-674-5p	mmu_circ_1539_XM_036160537.1
mmu-miR-674-3p	mmu_circ_1539_XM_036160537.1
mmu-miR-676-5p	mmu_circ_1539_XM_036160537.1
mmu-miR-676-3p	mmu_circ_1539_XM_036160537.1
mmu-miR-677-5p	mmu_circ_1539_XM_036160537.1
mmu-miR-6944-3p	mmu_circ_1539_XM_036160537.1
mmu-miR-6952-3p	mmu_circ_1539_XM_036160537.1
mmu-miR-6966-3p	mmu_circ_1539_XM_036160537.1
mmu-miR-700-5p	mmu_circ_1539_XM_036160537.1
mmu-miR-7048-3p	mmu_circ_1539_XM_036160537.1
mmu-miR-709	mmu_circ_1539_XM_036160537.1
mmu-miR-7225-5p	mmu_circ_1539_XM_036160537.1
mmu-miR-770-3p	mmu_circ_1539_XM_036160537.1
mmu-miR-8103	mmu_circ_1539_XM_036160537.1
mmu-miR-8120	mmu_circ_1539_XM_036160537.1
mmu-miR-872-5p	mmu_circ_1539_XM_036160537.1
mmu-miR-874-3p	mmu_circ_1539_XM_036160537.1
mmu-miR-877-5p	mmu_circ_1539_XM_036160537.1
mmu-miR-93-3p	mmu_circ_1539_XM_036160537.1
novel_13	mmu_circ_1539_XM_036160537.1
novel_20	mmu_circ_1539_XM_036160537.1
novel_31	mmu_circ_1539_XM_036160537.1
novel_33	mmu_circ_1539_XM_036160537.1
novel_59	mmu_circ_1539_XM_036160537.1
novel_6	mmu_circ_1539_XM_036160537.1
mmu-miR-23b-5p	mmu_circ_1548_junction_seq
mmu-miR-490-3p	mmu_circ_1548_junction_seq
mmu-let-7a-2-3p	mmu_circ_1548_NM_001385708.1
mmu-miR-12184-3p	mmu_circ_1548_NM_001385708.1
mmu-miR-127-5p	mmu_circ_1548_NM_001385708.1
mmu-miR-129-5p	mmu_circ_1548_NM_001385708.1
mmu-miR-1291	mmu_circ_1548_NM_001385708.1
mmu-miR-130a-3p	mmu_circ_1548_NM_001385708.1
mmu-miR-130b-5p	mmu_circ_1548_NM_001385708.1
mmu-miR-132-3p	mmu_circ_1548_NM_001385708.1
mmu-miR-133a-3p	mmu_circ_1548_NM_001385708.1
mmu-miR-133b-3p	mmu_circ_1548_NM_001385708.1
mmu-miR-140-5p	mmu_circ_1548_NM_001385708.1
mmu-miR-140-3p	mmu_circ_1548_NM_001385708.1
mmu-miR-144-5p	mmu_circ_1548_NM_001385708.1
mmu-miR-145a-3p	mmu_circ_1548_NM_001385708.1
mmu-miR-145a-5p	mmu_circ_1548_NM_001385708.1
mmu-miR-148a-5p	mmu_circ_1548_NM_001385708.1
mmu-miR-148a-3p	mmu_circ_1548_NM_001385708.1
mmu-miR-148b-5p	mmu_circ_1548_NM_001385708.1
mmu-miR-149-5p	mmu_circ_1548_NM_001385708.1
mmu-miR-150-5p	mmu_circ_1548_NM_001385708.1
mmu-miR-151-3p	mmu_circ_1548_NM_001385708.1
mmu-miR-15a-5p	mmu_circ_1548_NM_001385708.1
mmu-miR-15b-5p	mmu_circ_1548_NM_001385708.1
mmu-miR-16-5p	mmu_circ_1548_NM_001385708.1
mmu-miR-181a-5p	mmu_circ_1548_NM_001385708.1
mmu-miR-181a-1-3p	mmu_circ_1548_NM_001385708.1
mmu-miR-181a-2-3p	mmu_circ_1548_NM_001385708.1
mmu-miR-181b-5p	mmu_circ_1548_NM_001385708.1
mmu-miR-181c-5p	mmu_circ_1548_NM_001385708.1
mmu-miR-181c-3p	mmu_circ_1548_NM_001385708.1
mmu-miR-181d-5p	mmu_circ_1548_NM_001385708.1
mmu-miR-1843b-5p	mmu_circ_1548_NM_001385708.1
mmu-miR-187-3p	mmu_circ_1548_NM_001385708.1
mmu-miR-191-3p	mmu_circ_1548_NM_001385708.1
mmu-miR-1938	mmu_circ_1548_NM_001385708.1
mmu-miR-193b-3p	mmu_circ_1548_NM_001385708.1
mmu-miR-194-5p	mmu_circ_1548_NM_001385708.1
mmu-miR-1943-5p	mmu_circ_1548_NM_001385708.1
mmu-miR-195a-5p	mmu_circ_1548_NM_001385708.1
mmu-miR-1981-5p	mmu_circ_1548_NM_001385708.1
mmu-miR-1983	mmu_circ_1548_NM_001385708.1
mmu-miR-199a-5p	mmu_circ_1548_NM_001385708.1
mmu-miR-199b-5p	mmu_circ_1548_NM_001385708.1
mmu-miR-204-5p	mmu_circ_1548_NM_001385708.1
mmu-miR-205-5p	mmu_circ_1548_NM_001385708.1
mmu-miR-208a-5p	mmu_circ_1548_NM_001385708.1
mmu-miR-208b-5p	mmu_circ_1548_NM_001385708.1
mmu-miR-212-5p	mmu_circ_1548_NM_001385708.1
mmu-miR-214-3p	mmu_circ_1548_NM_001385708.1
mmu-miR-218-5p	mmu_circ_1548_NM_001385708.1
mmu-miR-22-5p	mmu_circ_1548_NM_001385708.1
mmu-miR-23a-3p	mmu_circ_1548_NM_001385708.1
mmu-miR-23b-5p	mmu_circ_1548_NM_001385708.1
mmu-miR-23b-3p	mmu_circ_1548_NM_001385708.1
mmu-miR-26a-2-3p	mmu_circ_1548_NM_001385708.1
mmu-miR-26b-3p	mmu_circ_1548_NM_001385708.1
mmu-miR-299a-3p	mmu_circ_1548_NM_001385708.1
mmu-miR-29a-5p	mmu_circ_1548_NM_001385708.1
mmu-miR-29b-2-5p	mmu_circ_1548_NM_001385708.1
mmu-miR-301a-5p	mmu_circ_1548_NM_001385708.1
mmu-miR-3074-2-3p	mmu_circ_1548_NM_001385708.1
mmu-miR-3098-3p	mmu_circ_1548_NM_001385708.1
mmu-miR-30a-3p	mmu_circ_1548_NM_001385708.1
mmu-miR-30d-3p	mmu_circ_1548_NM_001385708.1
mmu-miR-30e-3p	mmu_circ_1548_NM_001385708.1
mmu-miR-320-3p	mmu_circ_1548_NM_001385708.1
mmu-miR-322-5p	mmu_circ_1548_NM_001385708.1
mmu-miR-322-3p	mmu_circ_1548_NM_001385708.1
mmu-miR-323-3p	mmu_circ_1548_NM_001385708.1
mmu-miR-330-5p	mmu_circ_1548_NM_001385708.1
mmu-miR-335-3p	mmu_circ_1548_NM_001385708.1
mmu-miR-338-3p	mmu_circ_1548_NM_001385708.1
mmu-miR-340-3p	mmu_circ_1548_NM_001385708.1
mmu-miR-342-3p	mmu_circ_1548_NM_001385708.1
mmu-miR-3470a	mmu_circ_1548_NM_001385708.1
mmu-miR-3470b	mmu_circ_1548_NM_001385708.1
mmu-miR-3473b	mmu_circ_1548_NM_001385708.1
mmu-miR-34a-5p	mmu_circ_1548_NM_001385708.1
mmu-miR-350-3p	mmu_circ_1548_NM_001385708.1
mmu-miR-362-5p	mmu_circ_1548_NM_001385708.1
mmu-miR-370-3p	mmu_circ_1548_NM_001385708.1
mmu-miR-378a-3p	mmu_circ_1548_NM_001385708.1
mmu-miR-378c	mmu_circ_1548_NM_001385708.1
mmu-miR-378d	mmu_circ_1548_NM_001385708.1
mmu-miR-411-3p	mmu_circ_1548_NM_001385708.1
mmu-miR-425-3p	mmu_circ_1548_NM_001385708.1
mmu-miR-434-3p	mmu_circ_1548_NM_001385708.1
mmu-miR-450b-5p	mmu_circ_1548_NM_001385708.1
mmu-miR-450b-3p	mmu_circ_1548_NM_001385708.1
mmu-miR-466f-3p	mmu_circ_1548_NM_001385708.1
mmu-miR-466i-5p	mmu_circ_1548_NM_001385708.1
mmu-miR-486a-3p	mmu_circ_1548_NM_001385708.1
mmu-miR-486b-3p	mmu_circ_1548_NM_001385708.1
mmu-miR-490-3p	mmu_circ_1548_NM_001385708.1
mmu-miR-497a-5p	mmu_circ_1548_NM_001385708.1
mmu-miR-497b	mmu_circ_1548_NM_001385708.1
mmu-miR-504-5p	mmu_circ_1548_NM_001385708.1
mmu-miR-511-5p	mmu_circ_1548_NM_001385708.1
mmu-miR-5121	mmu_circ_1548_NM_001385708.1
mmu-miR-532-3p	mmu_circ_1548_NM_001385708.1
mmu-miR-542-5p	mmu_circ_1548_NM_001385708.1
mmu-miR-5615-5p	mmu_circ_1548_NM_001385708.1
mmu-miR-5615-3p	mmu_circ_1548_NM_001385708.1
mmu-miR-574-5p	mmu_circ_1548_NM_001385708.1
mmu-miR-598-3p	mmu_circ_1548_NM_001385708.1
mmu-miR-6516-3p	mmu_circ_1548_NM_001385708.1
mmu-miR-6538	mmu_circ_1548_NM_001385708.1
mmu-miR-664-5p	mmu_circ_1548_NM_001385708.1
mmu-miR-671-5p	mmu_circ_1548_NM_001385708.1
mmu-miR-674-5p	mmu_circ_1548_NM_001385708.1
mmu-miR-674-3p	mmu_circ_1548_NM_001385708.1
mmu-miR-676-5p	mmu_circ_1548_NM_001385708.1
mmu-miR-676-3p	mmu_circ_1548_NM_001385708.1
mmu-miR-677-5p	mmu_circ_1548_NM_001385708.1
mmu-miR-6952-3p	mmu_circ_1548_NM_001385708.1
mmu-miR-6966-3p	mmu_circ_1548_NM_001385708.1
mmu-miR-700-5p	mmu_circ_1548_NM_001385708.1
mmu-miR-7048-3p	mmu_circ_1548_NM_001385708.1
mmu-miR-709	mmu_circ_1548_NM_001385708.1
mmu-miR-7225-5p	mmu_circ_1548_NM_001385708.1
mmu-miR-770-3p	mmu_circ_1548_NM_001385708.1
mmu-miR-8103	mmu_circ_1548_NM_001385708.1
mmu-miR-8120	mmu_circ_1548_NM_001385708.1
mmu-miR-872-5p	mmu_circ_1548_NM_001385708.1
mmu-miR-874-3p	mmu_circ_1548_NM_001385708.1
mmu-miR-877-5p	mmu_circ_1548_NM_001385708.1
mmu-miR-93-3p	mmu_circ_1548_NM_001385708.1
novel_13	mmu_circ_1548_NM_001385708.1
novel_20	mmu_circ_1548_NM_001385708.1
novel_31	mmu_circ_1548_NM_001385708.1
novel_33	mmu_circ_1548_NM_001385708.1
novel_59	mmu_circ_1548_NM_001385708.1
novel_6	mmu_circ_1548_NM_001385708.1
mmu-miR-128-3p	mmu_circ_2045_NM_010212.4
mmu-miR-145a-3p	mmu_circ_2045_NM_010212.4
mmu-miR-1947-5p	mmu_circ_2045_NM_010212.4
mmu-miR-205-5p	mmu_circ_2045_NM_010212.4
mmu-miR-212-5p	mmu_circ_2045_NM_010212.4
mmu-miR-362-5p	mmu_circ_2045_NM_010212.4
mmu-miR-6240	mmu_circ_2045_NM_010212.4
mmu-miR-511-5p	mmu_circ_2258_junction_seq
mmu-miR-106b-3p	mmu_circ_2258_NM_172536.3
mmu-miR-1247-5p	mmu_circ_2258_NM_172536.3
mmu-miR-130b-5p	mmu_circ_2258_NM_172536.3
mmu-miR-145a-5p	mmu_circ_2258_NM_172536.3
mmu-miR-149-5p	mmu_circ_2258_NM_172536.3
mmu-miR-150-5p	mmu_circ_2258_NM_172536.3
mmu-miR-15a-5p	mmu_circ_2258_NM_172536.3
mmu-miR-15b-5p	mmu_circ_2258_NM_172536.3
mmu-miR-16-5p	mmu_circ_2258_NM_172536.3
mmu-miR-185-5p	mmu_circ_2258_NM_172536.3
mmu-miR-191-3p	mmu_circ_2258_NM_172536.3
mmu-miR-195a-5p	mmu_circ_2258_NM_172536.3
mmu-miR-23b-5p	mmu_circ_2258_NM_172536.3
mmu-miR-26a-2-3p	mmu_circ_2258_NM_172536.3
mmu-miR-26b-3p	mmu_circ_2258_NM_172536.3
mmu-miR-3098-3p	mmu_circ_2258_NM_172536.3
mmu-miR-322-5p	mmu_circ_2258_NM_172536.3
mmu-miR-3473a	mmu_circ_2258_NM_172536.3
mmu-miR-3473b	mmu_circ_2258_NM_172536.3
mmu-miR-361-3p	mmu_circ_2258_NM_172536.3
mmu-miR-374c-3p	mmu_circ_2258_NM_172536.3
mmu-miR-497a-5p	mmu_circ_2258_NM_172536.3
mmu-miR-504-5p	mmu_circ_2258_NM_172536.3
mmu-miR-664-5p	mmu_circ_2258_NM_172536.3
mmu-miR-700-5p	mmu_circ_2258_NM_172536.3
mmu-miR-7048-3p	mmu_circ_2258_NM_172536.3
mmu-miR-3071-3p	mmu_circ_2471_NM_008609.4
mmu-miR-511-5p	mmu_circ_2471_NM_008609.4
mmu-miR-532-5p	mmu_circ_2471_NM_008609.4
mmu-miR-704	mmu_circ_2471_NM_008609.4
mmu-let-7a-5p	mmu_circ_3252_XM_006498967.4
mmu-let-7b-5p	mmu_circ_3252_XM_006498967.4
mmu-let-7c-5p	mmu_circ_3252_XM_006498967.4
mmu-let-7g-5p	mmu_circ_3252_XM_006498967.4
mmu-let-7i-5p	mmu_circ_3252_XM_006498967.4
mmu-miR-127-5p	mmu_circ_3252_XM_006498967.4
mmu-miR-139-5p	mmu_circ_3252_XM_006498967.4
mmu-miR-145a-3p	mmu_circ_3252_XM_006498967.4
mmu-miR-152-5p	mmu_circ_3252_XM_006498967.4
mmu-miR-3068-5p	mmu_circ_3252_XM_006498967.4
mmu-miR-320-3p	mmu_circ_3252_XM_006498967.4
mmu-miR-339-5p	mmu_circ_3252_XM_006498967.4
mmu-miR-8103	mmu_circ_3252_XM_006498967.4
mmu-miR-127-5p	mmu_circ_3252_XM_006498971.5
mmu-miR-139-5p	mmu_circ_3252_XM_006498971.5
mmu-miR-145a-3p	mmu_circ_3252_XM_006498971.5
mmu-miR-3068-5p	mmu_circ_3252_XM_006498971.5
mmu-miR-320-3p	mmu_circ_3252_XM_006498971.5
mmu-miR-8103	mmu_circ_3252_XM_006498971.5
mmu-let-7a-5p	mmu_circ_3252_XM_011239364.3
mmu-let-7b-5p	mmu_circ_3252_XM_011239364.3
mmu-let-7c-5p	mmu_circ_3252_XM_011239364.3
mmu-let-7g-5p	mmu_circ_3252_XM_011239364.3
mmu-let-7i-5p	mmu_circ_3252_XM_011239364.3
mmu-miR-127-5p	mmu_circ_3252_XM_011239364.3
mmu-miR-139-5p	mmu_circ_3252_XM_011239364.3
mmu-miR-145a-3p	mmu_circ_3252_XM_011239364.3
mmu-miR-152-5p	mmu_circ_3252_XM_011239364.3
mmu-miR-17-3p	mmu_circ_3252_XM_011239364.3
mmu-miR-3068-5p	mmu_circ_3252_XM_011239364.3
mmu-miR-320-3p	mmu_circ_3252_XM_011239364.3
mmu-miR-339-5p	mmu_circ_3252_XM_011239364.3
mmu-miR-8103	mmu_circ_3252_XM_011239364.3
mmu-let-7a-5p	mmu_circ_3252_XM_017316533.3
mmu-let-7b-5p	mmu_circ_3252_XM_017316533.3
mmu-let-7c-5p	mmu_circ_3252_XM_017316533.3
mmu-let-7g-5p	mmu_circ_3252_XM_017316533.3
mmu-let-7i-5p	mmu_circ_3252_XM_017316533.3
mmu-miR-127-5p	mmu_circ_3252_XM_017316533.3
mmu-miR-139-5p	mmu_circ_3252_XM_017316533.3
mmu-miR-145a-3p	mmu_circ_3252_XM_017316533.3
mmu-miR-152-5p	mmu_circ_3252_XM_017316533.3
mmu-miR-3068-5p	mmu_circ_3252_XM_017316533.3
mmu-miR-320-3p	mmu_circ_3252_XM_017316533.3
mmu-miR-339-5p	mmu_circ_3252_XM_017316533.3
mmu-miR-8103	mmu_circ_3252_XM_017316533.3
mmu-let-7a-5p	mmu_circ_3252_XM_030248703.2
mmu-let-7b-5p	mmu_circ_3252_XM_030248703.2
mmu-let-7c-5p	mmu_circ_3252_XM_030248703.2
mmu-let-7g-5p	mmu_circ_3252_XM_030248703.2
mmu-let-7i-5p	mmu_circ_3252_XM_030248703.2
mmu-miR-127-5p	mmu_circ_3252_XM_030248703.2
mmu-miR-139-5p	mmu_circ_3252_XM_030248703.2
mmu-miR-145a-3p	mmu_circ_3252_XM_030248703.2
mmu-miR-152-5p	mmu_circ_3252_XM_030248703.2
mmu-miR-17-3p	mmu_circ_3252_XM_030248703.2
mmu-miR-3068-5p	mmu_circ_3252_XM_030248703.2
mmu-miR-320-3p	mmu_circ_3252_XM_030248703.2
mmu-miR-339-5p	mmu_circ_3252_XM_030248703.2
mmu-miR-8103	mmu_circ_3252_XM_030248703.2
mmu-miR-203b-5p	mmu_circ_384_NM_001252282.1
mmu-miR-218-5p	mmu_circ_384_NM_001252282.1
mmu-miR-221-3p	mmu_circ_384_NM_001252282.1
mmu-miR-222-3p	mmu_circ_384_NM_001252282.1
mmu-miR-338-3p	mmu_circ_384_NM_001252282.1
mmu-miR-34a-5p	mmu_circ_384_NM_001252282.1
mmu-miR-666-5p	mmu_circ_384_NM_001252282.1
mmu-miR-874-3p	mmu_circ_384_NM_001252282.1
mmu-miR-203b-5p	mmu_circ_384_XM_036156413.1
mmu-miR-218-5p	mmu_circ_384_XM_036156413.1
mmu-miR-221-3p	mmu_circ_384_XM_036156413.1
mmu-miR-222-3p	mmu_circ_384_XM_036156413.1
mmu-miR-3071-3p	mmu_circ_384_XM_036156413.1
mmu-miR-338-3p	mmu_circ_384_XM_036156413.1
mmu-miR-34a-5p	mmu_circ_384_XM_036156413.1
mmu-miR-504-5p	mmu_circ_384_XM_036156413.1
mmu-miR-666-5p	mmu_circ_384_XM_036156413.1
mmu-miR-770-3p	mmu_circ_384_XM_036156413.1
mmu-miR-874-3p	mmu_circ_384_XM_036156413.1
mmu-miR-12194-3p	mmu_circ_4456_junction_seq
mmu-miR-378d	mmu_circ_4456_junction_seq
mmu-miR-12194-3p	mmu_circ_4456_NM_008689.2
mmu-miR-124-5p	mmu_circ_4456_NM_008689.2
mmu-miR-145a-5p	mmu_circ_4456_NM_008689.2
mmu-miR-22-5p	mmu_circ_4456_NM_008689.2
mmu-miR-301a-5p	mmu_circ_4456_NM_008689.2
mmu-miR-378d	mmu_circ_4456_NM_008689.2
mmu-miR-5615-5p	mmu_circ_4456_NM_008689.2
mmu-miR-6240	mmu_circ_4456_NM_008689.2
mmu-miR-671-5p	mmu_circ_4456_NM_008689.2
mmu-miR-6952-3p	mmu_circ_4456_NM_008689.2
mmu-miR-6964-3p	mmu_circ_4456_NM_008689.2
mmu-miR-8103	mmu_circ_4456_NM_008689.2
novel_37	mmu_circ_4456_NM_008689.2
mmu-miR-3473b	mmu_circ_5616_junction_seq
mmu-miR-152-5p	mmu_circ_5616_XM_036165958.1
mmu-miR-154-5p	mmu_circ_5616_XM_036165958.1
mmu-miR-17-3p	mmu_circ_5616_XM_036165958.1
mmu-miR-1943-3p	mmu_circ_5616_XM_036165958.1
mmu-miR-27a-5p	mmu_circ_5616_XM_036165958.1
mmu-miR-299a-3p	mmu_circ_5616_XM_036165958.1
mmu-miR-29b-2-5p	mmu_circ_5616_XM_036165958.1
mmu-miR-3473b	mmu_circ_5616_XM_036165958.1
mmu-miR-3535	mmu_circ_5616_XM_036165958.1
mmu-miR-676-5p	mmu_circ_5616_XM_036165958.1
mmu-miR-6966-3p	mmu_circ_5616_XM_036165958.1
novel_31	mmu_circ_5616_XM_036165958.1
mmu-miR-29b-2-5p	mmu_circ_799_junction_seq
mmu-miR-148a-3p	mmu_circ_799_XM_006516610.2
mmu-miR-200c-3p	mmu_circ_799_XM_006516610.2
mmu-miR-212-5p	mmu_circ_799_XM_006516610.2
mmu-miR-3098-3p	mmu_circ_799_XM_006516610.2
mmu-miR-434-3p	mmu_circ_799_XM_006516610.2
mmu-miR-129-5p	mmu_circ_960_NM_001172098.1
mmu-miR-1291	mmu_circ_960_NM_001172098.1
mmu-miR-17-3p	mmu_circ_960_NM_001172098.1
mmu-miR-205-5p	mmu_circ_960_NM_001172098.1
mmu-miR-218-5p	mmu_circ_960_NM_001172098.1
mmu-miR-26a-2-3p	mmu_circ_960_NM_001172098.1
mmu-miR-26b-3p	mmu_circ_960_NM_001172098.1
mmu-miR-29b-2-5p	mmu_circ_960_NM_001172098.1
mmu-miR-30a-3p	mmu_circ_960_NM_001172098.1
mmu-miR-30d-3p	mmu_circ_960_NM_001172098.1
mmu-miR-30e-3p	mmu_circ_960_NM_001172098.1
mmu-miR-455-3p	mmu_circ_960_NM_001172098.1
mmu-miR-6964-3p	mmu_circ_960_NM_001172098.1
mmu-miR-7043-3p	mmu_circ_960_NM_001172098.1
novel_25	mmu_circ_960_NM_001172098.1
novel_6	mmu_circ_960_NM_001172098.1
