# Supplementary material for: Novel Transcriptomic Interactomes of Noncoding RNAs in the Heart under Altered Thyroid Hormonal States
Source: Int J Mol Sci. 2023 Mar 31;24(7):6560. doi: 10.3390/ijms24076560 (PMC10095585; doi:10.3390/ijms24076560)
Supplement: Supplementary file 1 [file ijms-24-06560-s001.zip › Supplemental File S19 miRNA mRNA Network KEGG Analysis.xlsx]

## Sheet: HypoTH vs Control
##Databases: KEGG PATHWAY
##Statistical test method: hypergeometric test / Fisher's exact test
##FDR correction method: Benjamini and Hochberg
#Term	Database	ID	Input number	Background number	P-Value	Corrected P-Value	Input	Hyperlink
Metabolic pathways	KEGG PATHWAY	mmu01100	39	1298	2.21e-09	4.92e-07	67942|74185|15931|12859|108682|56386|20019|55979|11564|12856|192185|11409|11428|15587|66916|67512|320404|18655|20603|67834|239017|17772|107476|17448|54613|80914|11992|269951|20322|102247|212862|56219|20022|22273|16430|11639|67054|11430|67130	http://www.genome.jp/kegg-bin/show_pathway?mmu01100/mmu:107476%09red/mmu:67512%09red/mmu:17448%09red/mmu:102247%09red/mmu:11430%09red/mmu:11992%09red/mmu:74185%09red/mmu:56386%09red/mmu:11639%09red/mmu:15931%09red/mmu:67942%09red/mmu:212862%09red/mmu:269951%09red/mmu:20603%09red/mmu:20022%09red/mmu:67054%09red/mmu:67130%09red/mmu:11428%09red/mmu:16430%09red/mmu:15587%09red/mmu:18655%09red/mmu:559…
Focal adhesion	KEGG PATHWAY	mmu04510	13	203	2.86e-07	3.17e-05	107589|23797|12444|12389|16780|70549|12387|18607|56637|238564|22340|81877|19699	http://www.genome.jp/kegg-bin/show_pathway?mmu04510/mmu:18607%09red/mmu:107589%09red/mmu:238564%09red/mmu:23797%09red/mmu:12444%09red/mmu:16780%09red/mmu:22340%09red/mmu:56637%09red/mmu:81877%09red/mmu:12389%09red/mmu:70549%09red/mmu:19699%09red/mmu:12387%09red
Ribosome	KEGG PATHWAY	mmu03010	11	148	5.97e-07	4.24e-05	16785|76808|76846|19982|68436|54127|19943|65019|94062|225215|22186	http://www.genome.jp/kegg-bin/show_pathway?mmu03010/mmu:68436%09red/mmu:94062%09red/mmu:76846%09red/mmu:16785%09red/mmu:19982%09red/mmu:65019%09red/mmu:76808%09red/mmu:22186%09red/mmu:19943%09red/mmu:225215%09red/mmu:54127%09red
Adrenergic signaling in cardiomyocytes	KEGG PATHWAY	mmu04261	11	152	7.65e-07	4.24e-05	23797|16509|14678|12293|381290|29857|11607|399548|224129|17896|26932	http://www.genome.jp/kegg-bin/show_pathway?mmu04261/mmu:11607%09red/mmu:12293%09red/mmu:26932%09red/mmu:23797%09red/mmu:14678%09red/mmu:224129%09red/mmu:399548%09red/mmu:17896%09red/mmu:29857%09red/mmu:381290%09red/mmu:16509%09red
Renin secretion	KEGG PATHWAY	mmu04924	7	72	1.37e-05	0.000421742	14678|19056|18575|11607|224129|16438|13030	http://www.genome.jp/kegg-bin/show_pathway?mmu04924/mmu:13030%09red/mmu:16438%09red/mmu:11607%09red/mmu:14678%09red/mmu:224129%09red/mmu:19056%09red/mmu:18575%09red
Dopaminergic synapse	KEGG PATHWAY	mmu04728	9	135	1.44e-05	0.000421742	23797|14678|29857|56637|14707|224129|19056|16438|26932	http://www.genome.jp/kegg-bin/show_pathway?mmu04728/mmu:16438%09red/mmu:26932%09red/mmu:23797%09red/mmu:14678%09red/mmu:224129%09red/mmu:14707%09red/mmu:56637%09red/mmu:19056%09red/mmu:29857%09red
FoxO signaling pathway	KEGG PATHWAY	mmu04068	9	135	1.44e-05	0.000421742	23797|12444|16337|29857|12914|18607|252870|16653|20656	http://www.genome.jp/kegg-bin/show_pathway?mmu04068/mmu:18607%09red/mmu:252870%09red/mmu:18176%09red/mmu:23797%09red/mmu:12914%09red/mmu:12444%09red/mmu:20656%09red/mmu:29857%09red/mmu:16337%09red
cGMP-PKG signaling pathway	KEGG PATHWAY	mmu04022	10	173	1.57e-05	0.000421742	107589|23797|238564|16337|381290|14678|19056|11607|224129|16438	http://www.genome.jp/kegg-bin/show_pathway?mmu04022/mmu:16438%09red/mmu:11607%09red/mmu:238564%09red/mmu:23797%09red/mmu:14678%09red/mmu:224129%09red/mmu:19056%09red/mmu:381290%09red/mmu:107589%09red/mmu:16337%09red
Rap1 signaling pathway	KEGG PATHWAY	mmu04015	11	215	1.77e-05	0.000421742	23797|70549|16337|16653|12387|14678|29857|21687|22340|224129|20130	http://www.genome.jp/kegg-bin/show_pathway?mmu04015/mmu:18176%09red/mmu:23797%09red/mmu:14678%09red/mmu:224129%09red/mmu:20130%09red/mmu:22340%09red/mmu:70549%09red/mmu:21687%09red/mmu:29857%09red/mmu:12387%09red/mmu:16337%09red
PI3K-Akt signaling pathway	KEGG PATHWAY	mmu04151	14	350	1.9e-05	0.000421742	23797|12444|16780|16337|21687|16653|18607|56637|14707|243764|22340|81877|19699|26932	http://www.genome.jp/kegg-bin/show_pathway?mmu04151/mmu:18607%09red/mmu:243764%09red/mmu:26932%09red/mmu:23797%09red/mmu:12444%09red/mmu:16780%09red/mmu:14707%09red/mmu:56637%09red/mmu:81877%09red/mmu:18176%09red/mmu:21687%09red/mmu:19699%09red/mmu:22340%09red/mmu:16337%09red
Insulin signaling pathway	KEGG PATHWAY	mmu04910	9	142	2.11e-05	0.000425417	23797|16337|104215|107476|16653|18607|56637|14251|20787	http://www.genome.jp/kegg-bin/show_pathway?mmu04910/mmu:18607%09red/mmu:107476%09red/mmu:14251%09red/mmu:23797%09red/mmu:18176%09red/mmu:56637%09red/mmu:104215%09red/mmu:20787%09red/mmu:16337%09red
Endometrial cancer	KEGG PATHWAY	mmu05213	6	52	2.35e-05	0.000435212	23797|12385|12387|16653|18607|56637	http://www.genome.jp/kegg-bin/show_pathway?mmu05213/mmu:18607%09red/mmu:23797%09red/mmu:18176%09red/mmu:56637%09red/mmu:12385%09red/mmu:12387%09red
Phospholipase D signaling pathway	KEGG PATHWAY	mmu04072	9	146	2.59e-05	0.000442826	23797|16337|16653|11607|224129|19158|55979|20130|67512	http://www.genome.jp/kegg-bin/show_pathway?mmu04072/mmu:19158%09red/mmu:18176%09red/mmu:67512%09red/mmu:23797%09red/mmu:224129%09red/mmu:20130%09red/mmu:55979%09red/mmu:11607%09red/mmu:16337%09red
Citrate cycle (TCA cycle)	KEGG PATHWAY	mmu00020	5	32	3.09e-05	0.00048973	17448|67834|239017|269951|11428	http://www.genome.jp/kegg-bin/show_pathway?mmu00020/mmu:11428%09red/mmu:17448%09red/mmu:269951%09red/mmu:67834%09red/mmu:239017%09red
Carbon metabolism	KEGG PATHWAY	mmu01200	8	118	3.86e-05	0.000571077	18655|67834|239017|11428|17448|11409|108682|269951	http://www.genome.jp/kegg-bin/show_pathway?mmu01200/mmu:17448%09red/mmu:269951%09red/mmu:67834%09red/mmu:108682%09red/mmu:18655%09red/mmu:239017%09red/mmu:11428%09red/mmu:11409%09red
Platelet activation	KEGG PATHWAY	mmu04611	8	123	5.09e-05	0.000706571	107589|23797|70549|238564|14678|29857|224129|16438	http://www.genome.jp/kegg-bin/show_pathway?mmu04611/mmu:16438%09red/mmu:238564%09red/mmu:23797%09red/mmu:14678%09red/mmu:224129%09red/mmu:70549%09red/mmu:29857%09red/mmu:107589%09red
AMPK signaling pathway	KEGG PATHWAY	mmu04152	8	129	6.99e-05	0.000912846	23797|16337|20250|107476|227154|18607|20787|26932	http://www.genome.jp/kegg-bin/show_pathway?mmu04152/mmu:18607%09red/mmu:107476%09red/mmu:20250%09red/mmu:26932%09red/mmu:23797%09red/mmu:227154%09red/mmu:20787%09red/mmu:16337%09red
2-Oxocarboxylic acid metabolism	KEGG PATHWAY	mmu01210	4	20	8.54e-05	0.00105291	108682|67834|269951|11428	http://www.genome.jp/kegg-bin/show_pathway?mmu01210/mmu:67834%09red/mmu:11428%09red/mmu:269951%09red/mmu:108682%09red
Calcium signaling pathway	KEGG PATHWAY	mmu04020	9	182	0.000130335	0.00152286	107589|238564|381290|19056|18575|11607|243764|16438|320404	http://www.genome.jp/kegg-bin/show_pathway?mmu04020/mmu:16438%09red/mmu:11607%09red/mmu:238564%09red/mmu:243764%09red/mmu:19056%09red/mmu:381290%09red/mmu:107589%09red/mmu:18575%09red/mmu:320404%09red
Prolactin signaling pathway	KEGG PATHWAY	mmu04917	6	74	0.000145535	0.00161543	23797|12444|16653|56468|29857|56637	http://www.genome.jp/kegg-bin/show_pathway?mmu04917/mmu:18176%09red/mmu:23797%09red/mmu:12444%09red/mmu:56637%09red/mmu:29857%09red/mmu:56468%09red
HIF-1 signaling pathway	KEGG PATHWAY	mmu04066	7	110	0.000170453	0.00180193	18655|23797|16337|12914|21687|228026|15980	http://www.genome.jp/kegg-bin/show_pathway?mmu04066/mmu:228026%09red/mmu:15980%09red/mmu:23797%09red/mmu:12914%09red/mmu:18655%09red/mmu:21687%09red/mmu:16337%09red
Cholinergic synapse	KEGG PATHWAY	mmu04725	7	113	0.00019936	0.001885	23797|14678|16653|14707|224129|243764|16438	http://www.genome.jp/kegg-bin/show_pathway?mmu04725/mmu:16438%09red/mmu:224129%09red/mmu:23797%09red/mmu:14678%09red/mmu:243764%09red/mmu:14707%09red/mmu:18176%09red
Oocyte meiosis	KEGG PATHWAY	mmu04114	7	116	0.0002321	0.001885	69010|26932|29857|19056|224129|16438|59008	http://www.genome.jp/kegg-bin/show_pathway?mmu04114/mmu:16438%09red/mmu:26932%09red/mmu:59008%09red/mmu:224129%09red/mmu:19056%09red/mmu:29857%09red/mmu:69010%09red
Chemokine signaling pathway	KEGG PATHWAY	mmu04062	9	198	0.000237828	0.001885	23797|14773|20315|14678|16653|56637|14707|224129|140580	http://www.genome.jp/kegg-bin/show_pathway?mmu04062/mmu:18176%09red/mmu:23797%09red/mmu:14678%09red/mmu:224129%09red/mmu:14707%09red/mmu:56637%09red/mmu:20315%09red/mmu:14773%09red/mmu:140580%09red
cAMP signaling pathway	KEGG PATHWAY	mmu04024	9	198	0.000237828	0.001885	23797|14678|381290|12914|15166|224129|243764|11430|20130	http://www.genome.jp/kegg-bin/show_pathway?mmu04024/mmu:243764%09red/mmu:224129%09red/mmu:23797%09red/mmu:12914%09red/mmu:14678%09red/mmu:15166%09red/mmu:20130%09red/mmu:11430%09red/mmu:381290%09red
Thyroid hormone signaling pathway	KEGG PATHWAY	mmu04919	7	117	0.000243928	0.001885	23797|16653|21833|12914|18607|56637|12387	http://www.genome.jp/kegg-bin/show_pathway?mmu04919/mmu:18607%09red/mmu:23797%09red/mmu:12914%09red/mmu:18176%09red/mmu:56637%09red/mmu:21833%09red/mmu:12387%09red
Huntington's disease	KEGG PATHWAY	mmu05016	9	199	0.000246457	0.001885	67942|66916|20022|12914|12859|22273|20656|16438|67130	http://www.genome.jp/kegg-bin/show_pathway?mmu05016/mmu:22273%09red/mmu:67942%09red/mmu:16438%09red/mmu:12914%09red/mmu:12859%09red/mmu:20022%09red/mmu:20656%09red/mmu:67130%09red/mmu:66916%09red
Non-alcoholic fatty liver disease (NAFLD)	KEGG PATHWAY	mmu04932	8	157	0.000252676	0.001885	23797|16337|66916|56637|12859|22273|20787|67130	http://www.genome.jp/kegg-bin/show_pathway?mmu04932/mmu:22273%09red/mmu:23797%09red/mmu:12859%09red/mmu:56637%09red/mmu:20787%09red/mmu:67130%09red/mmu:66916%09red/mmu:16337%09red
Pathways in cancer	KEGG PATHWAY	mmu05200	13	398	0.000261488	0.001885	23797|16780|20315|14678|12385|16653|12387|12914|56637|14707|11607|224129|22340	http://www.genome.jp/kegg-bin/show_pathway?mmu05200/mmu:18176%09red/mmu:23797%09red/mmu:12914%09red/mmu:14678%09red/mmu:224129%09red/mmu:16780%09red/mmu:14707%09red/mmu:22340%09red/mmu:56637%09red/mmu:11607%09red/mmu:20315%09red/mmu:12385%09red/mmu:12387%09red
HTLV-I infection	KEGG PATHWAY	mmu05166	11	295	0.000263032	0.001885	23797|12444|16653|12387|12914|70549|56637|224129|19056|20130|59008	http://www.genome.jp/kegg-bin/show_pathway?mmu05166/mmu:224129%09red/mmu:59008%09red/mmu:23797%09red/mmu:12914%09red/mmu:12444%09red/mmu:20130%09red/mmu:56637%09red/mmu:19056%09red/mmu:18176%09red/mmu:70549%09red/mmu:12387%09red
Oxytocin signaling pathway	KEGG PATHWAY	mmu04921	8	158	0.000263221	0.001885	107589|238564|14678|12293|16653|19056|224129|16438	http://www.genome.jp/kegg-bin/show_pathway?mmu04921/mmu:16438%09red/mmu:18176%09red/mmu:12293%09red/mmu:238564%09red/mmu:14678%09red/mmu:224129%09red/mmu:19056%09red/mmu:107589%09red
Prostate cancer	KEGG PATHWAY	mmu05215	6	89	0.000371844	0.00257967	23797|12914|12387|16653|18607|56637	http://www.genome.jp/kegg-bin/show_pathway?mmu05215/mmu:18607%09red/mmu:23797%09red/mmu:12914%09red/mmu:18176%09red/mmu:56637%09red/mmu:12387%09red
Progesterone-mediated oocyte maturation	KEGG PATHWAY	mmu04914	6	90	0.000393374	0.00264634	23797|69010|14678|29857|224129|59008	http://www.genome.jp/kegg-bin/show_pathway?mmu04914/mmu:59008%09red/mmu:23797%09red/mmu:14678%09red/mmu:224129%09red/mmu:29857%09red/mmu:69010%09red
Influenza A	KEGG PATHWAY	mmu05164	8	172	0.000452715	0.00295596	23797|117198|27103|232989|12914|56637|29857|15980	http://www.genome.jp/kegg-bin/show_pathway?mmu05164/mmu:15980%09red/mmu:23797%09red/mmu:12914%09red/mmu:232989%09red/mmu:56637%09red/mmu:27103%09red/mmu:117198%09red/mmu:29857%09red
Axon guidance	KEGG PATHWAY	mmu04360	8	176	0.000523537	0.00332072	20315|14678|16653|19056|228026|13643|56637|20130	http://www.genome.jp/kegg-bin/show_pathway?mmu04360/mmu:228026%09red/mmu:14678%09red/mmu:18176%09red/mmu:20130%09red/mmu:56637%09red/mmu:13643%09red/mmu:19056%09red/mmu:20315%09red
Alzheimer's disease	KEGG PATHWAY	mmu05010	8	177	0.000542575	0.00334588	67942|66916|56637|12859|22273|19056|16438|67130	http://www.genome.jp/kegg-bin/show_pathway?mmu05010/mmu:22273%09red/mmu:67942%09red/mmu:16438%09red/mmu:12859%09red/mmu:56637%09red/mmu:19056%09red/mmu:67130%09red/mmu:66916%09red
Longevity regulating pathway - multiple species	KEGG PATHWAY	mmu04213	5	64	0.000614895	0.00368937	20656|23797|224129|16653|16337	http://www.genome.jp/kegg-bin/show_pathway?mmu04213/mmu:23797%09red/mmu:20656%09red/mmu:224129%09red/mmu:18176%09red/mmu:16337%09red
Melanogenesis	KEGG PATHWAY	mmu04916	6	99	0.000634058	0.00370423	14678|12914|12387|16653|56637|224129	http://www.genome.jp/kegg-bin/show_pathway?mmu04916/mmu:18176%09red/mmu:12914%09red/mmu:14678%09red/mmu:224129%09red/mmu:56637%09red/mmu:12387%09red
Oxidative phosphorylation	KEGG PATHWAY	mmu00190	7	139	0.000653244	0.00371847	74776|67942|66916|12859|22273|67130|12856	http://www.genome.jp/kegg-bin/show_pathway?mmu00190/mmu:22273%09red/mmu:67942%09red/mmu:12856%09red/mmu:12859%09red/mmu:74776%09red/mmu:67130%09red/mmu:66916%09red
Signaling pathways regulating pluripotency of stem cells	KEGG PATHWAY	mmu04550	7	140	0.000680186	0.0037647	23797|16880|16653|12387|29857|56637|11479	http://www.genome.jp/kegg-bin/show_pathway?mmu04550/mmu:12387%09red/mmu:23797%09red/mmu:18176%09red/mmu:56637%09red/mmu:11479%09red/mmu:29857%09red/mmu:16880%09red
Ras signaling pathway	KEGG PATHWAY	mmu04014	9	231	0.000695282	0.0037647	23797|16337|19344|19345|16653|21687|22340|14707|20130	http://www.genome.jp/kegg-bin/show_pathway?mmu04014/mmu:23797%09red/mmu:19344%09red/mmu:18176%09red/mmu:14707%09red/mmu:20130%09red/mmu:22340%09red/mmu:19345%09red/mmu:21687%09red/mmu:16337%09red
Retrograde endocannabinoid signaling	KEGG PATHWAY	mmu04723	6	103	0.000771979	0.00408046	14678|29857|14707|72961|224129|16438	http://www.genome.jp/kegg-bin/show_pathway?mmu04723/mmu:16438%09red/mmu:14678%09red/mmu:224129%09red/mmu:14707%09red/mmu:72961%09red/mmu:29857%09red
T cell receptor signaling pathway	KEGG PATHWAY	mmu04660	6	105	0.000849084	0.00438364	23797|16653|29857|18607|19056|56637	http://www.genome.jp/kegg-bin/show_pathway?mmu04660/mmu:18607%09red/mmu:23797%09red/mmu:18176%09red/mmu:56637%09red/mmu:19056%09red/mmu:29857%09red
Parkinson's disease	KEGG PATHWAY	mmu05012	7	149	0.000964388	0.00486577	67942|14678|66916|12859|22273|224129|67130	http://www.genome.jp/kegg-bin/show_pathway?mmu05012/mmu:22273%09red/mmu:67942%09red/mmu:14678%09red/mmu:224129%09red/mmu:12859%09red/mmu:67130%09red/mmu:66916%09red
Gastric acid secretion	KEGG PATHWAY	mmu04971	5	73	0.00107445	0.00530062	107589|238564|16438|224129|14678	http://www.genome.jp/kegg-bin/show_pathway?mmu04971/mmu:224129%09red/mmu:14678%09red/mmu:107589%09red/mmu:16438%09red/mmu:238564%09red
Arrhythmogenic right ventricular cardiomyopathy (ARVC)	KEGG PATHWAY	mmu05412	5	74	0.00113788	0.00549149	67451|12385|12387|12293|24052	http://www.genome.jp/kegg-bin/show_pathway?mmu05412/mmu:12293%09red/mmu:67451%09red/mmu:12387%09red/mmu:24052%09red/mmu:12385%09red
Toxoplasmosis	KEGG PATHWAY	mmu05145	6	113	0.00121844	0.00575406	23797|16780|14678|29857|18607|15980	http://www.genome.jp/kegg-bin/show_pathway?mmu05145/mmu:18607%09red/mmu:15980%09red/mmu:23797%09red/mmu:14678%09red/mmu:16780%09red/mmu:29857%09red
mTOR signaling pathway	KEGG PATHWAY	mmu04150	7	156	0.00124412	0.00575406	23797|16337|16653|227154|56637|18607|72124	http://www.genome.jp/kegg-bin/show_pathway?mmu04150/mmu:18607%09red/mmu:23797%09red/mmu:227154%09red/mmu:18176%09red/mmu:56637%09red/mmu:72124%09red/mmu:16337%09red
MAPK signaling pathway	KEGG PATHWAY	mmu04010	9	254	0.00131904	0.00589411	23797|12293|29857|30957|19043|19056|16653|225028|20130	http://www.genome.jp/kegg-bin/show_pathway?mmu04010/mmu:225028%09red/mmu:12293%09red/mmu:23797%09red/mmu:18176%09red/mmu:20130%09red/mmu:30957%09red/mmu:19056%09red/mmu:19043%09red/mmu:29857%09red
Glutamatergic synapse	KEGG PATHWAY	mmu04724	6	115	0.0013275	0.00589411	14678|19056|14707|72961|224129|16438	http://www.genome.jp/kegg-bin/show_pathway?mmu04724/mmu:16438%09red/mmu:14678%09red/mmu:224129%09red/mmu:14707%09red/mmu:72961%09red/mmu:19056%09red
Bacterial invasion of epithelial cells	KEGG PATHWAY	mmu05100	5	78	0.0014196	0.00615593	56378|12385|12387|140580|12389	http://www.genome.jp/kegg-bin/show_pathway?mmu05100/mmu:56378%09red/mmu:12387%09red/mmu:12389%09red/mmu:140580%09red/mmu:12385%09red
Proteoglycans in cancer	KEGG PATHWAY	mmu05205	8	208	0.00147348	0.00615593	23797|16438|12389|16653|12387|29857|18607|20130	http://www.genome.jp/kegg-bin/show_pathway?mmu05205/mmu:18607%09red/mmu:16438%09red/mmu:23797%09red/mmu:18176%09red/mmu:20130%09red/mmu:12389%09red/mmu:29857%09red/mmu:12387%09red
Jak-STAT signaling pathway	KEGG PATHWAY	mmu04630	7	161	0.0014801	0.00615593	23797|16880|56468|12914|12444|15980|16157	http://www.genome.jp/kegg-bin/show_pathway?mmu04630/mmu:15980%09red/mmu:23797%09red/mmu:12914%09red/mmu:12444%09red/mmu:56468%09red/mmu:16157%09red/mmu:16880%09red
Biosynthesis of amino acids	KEGG PATHWAY	mmu01230	5	79	0.00149739	0.00615593	18655|108682|67834|269951|11428	http://www.genome.jp/kegg-bin/show_pathway?mmu01230/mmu:67834%09red/mmu:11428%09red/mmu:269951%09red/mmu:108682%09red/mmu:18655%09red
Peroxisome	KEGG PATHWAY	mmu04146	5	83	0.00184021	0.00742775	20656|11430|18632|269951|12908	http://www.genome.jp/kegg-bin/show_pathway?mmu04146/mmu:18632%09red/mmu:20656%09red/mmu:11430%09red/mmu:269951%09red/mmu:12908%09red
Sphingolipid signaling pathway	KEGG PATHWAY	mmu04071	6	125	0.00198863	0.0078835	23797|14678|16653|29857|18607|26932	http://www.genome.jp/kegg-bin/show_pathway?mmu04071/mmu:18607%09red/mmu:26932%09red/mmu:23797%09red/mmu:14678%09red/mmu:18176%09red/mmu:29857%09red
Fatty acid metabolism	KEGG PATHWAY	mmu01212	4	52	0.00230146	0.00896359	11430|20250|11409|107476	http://www.genome.jp/kegg-bin/show_pathway?mmu01212/mmu:107476%09red/mmu:11430%09red/mmu:20250%09red/mmu:11409%09red
GnRH signaling pathway	KEGG PATHWAY	mmu04912	5	88	0.00234549	0.00897757	29857|16438|224129|17387|16653	http://www.genome.jp/kegg-bin/show_pathway?mmu04912/mmu:17387%09red/mmu:29857%09red/mmu:16438%09red/mmu:224129%09red/mmu:18176%09red
Purine metabolism	KEGG PATHWAY	mmu00230	7	179	0.00262989	0.00973058	20022|18575|224129|11639|20019|67054|11564	http://www.genome.jp/kegg-bin/show_pathway?mmu00230/mmu:11639%09red/mmu:224129%09red/mmu:20019%09red/mmu:11564%09red/mmu:20022%09red/mmu:67054%09red/mmu:18575%09red
Tuberculosis	KEGG PATHWAY	mmu05152	7	179	0.00262989	0.00973058	23797|19344|19345|12914|19056|29857|15980	http://www.genome.jp/kegg-bin/show_pathway?mmu05152/mmu:15980%09red/mmu:23797%09red/mmu:12914%09red/mmu:19345%09red/mmu:19056%09red/mmu:19344%09red/mmu:29857%09red
Morphine addiction	KEGG PATHWAY	mmu05032	5	93	0.00294477	0.010717	14707|18575|224129|14773|14678	http://www.genome.jp/kegg-bin/show_pathway?mmu05032/mmu:14773%09red/mmu:14678%09red/mmu:224129%09red/mmu:18575%09red/mmu:14707%09red
Glycerophospholipid metabolism	KEGG PATHWAY	mmu00564	5	94	0.00307674	0.0108538	55979|67512|74182|102247|212862	http://www.genome.jp/kegg-bin/show_pathway?mmu00564/mmu:74182%09red/mmu:67512%09red/mmu:55979%09red/mmu:212862%09red/mmu:102247%09red
Hepatitis C	KEGG PATHWAY	mmu05160	6	137	0.00308012	0.0108538	23797|27103|16653|29857|18607|56637	http://www.genome.jp/kegg-bin/show_pathway?mmu05160/mmu:18607%09red/mmu:23797%09red/mmu:27103%09red/mmu:18176%09red/mmu:56637%09red/mmu:29857%09red
Regulation of lipolysis in adipocytes	KEGG PATHWAY	mmu04923	4	57	0.00314618	0.0109133	23797|16337|224129|14678	http://www.genome.jp/kegg-bin/show_pathway?mmu04923/mmu:23797%09red/mmu:14678%09red/mmu:224129%09red/mmu:16337%09red
Endocrine resistance	KEGG PATHWAY	mmu01522	5	95	0.00321291	0.0109733	29857|23797|224129|54485|16653	http://www.genome.jp/kegg-bin/show_pathway?mmu01522/mmu:23797%09red/mmu:54485%09red/mmu:224129%09red/mmu:18176%09red/mmu:29857%09red
Apoptosis	KEGG PATHWAY	mmu04210	6	139	0.0032984	0.0110946	23797|16653|18607|13038|16438|13030	http://www.genome.jp/kegg-bin/show_pathway?mmu04210/mmu:18607%09red/mmu:13030%09red/mmu:16438%09red/mmu:23797%09red/mmu:13038%09red/mmu:18176%09red
Longevity regulating pathway	KEGG PATHWAY	mmu04211	5	96	0.00335338	0.0111112	20656|23797|224129|16653|16337	http://www.genome.jp/kegg-bin/show_pathway?mmu04211/mmu:23797%09red/mmu:20656%09red/mmu:224129%09red/mmu:18176%09red/mmu:16337%09red
Tight junction	KEGG PATHWAY	mmu04530	6	141	0.003528	0.0115179	23797|14678|12385|12387|16653|20130	http://www.genome.jp/kegg-bin/show_pathway?mmu04530/mmu:23797%09red/mmu:14678%09red/mmu:18176%09red/mmu:20130%09red/mmu:12385%09red/mmu:12387%09red
Estrogen signaling pathway	KEGG PATHWAY	mmu04915	5	98	0.00364746	0.0117353	23797|16438|224129|16653|14678	http://www.genome.jp/kegg-bin/show_pathway?mmu04915/mmu:23797%09red/mmu:14678%09red/mmu:224129%09red/mmu:18176%09red/mmu:16438%09red
VEGF signaling pathway	KEGG PATHWAY	mmu04370	4	60	0.00374301	0.0118707	23797|16653|29857|19056	http://www.genome.jp/kegg-bin/show_pathway?mmu04370/mmu:23797%09red/mmu:29857%09red/mmu:19056%09red/mmu:18176%09red
Choline metabolism in cancer	KEGG PATHWAY	mmu05231	5	101	0.00412261	0.0128904	23797|212862|16653|74182|18607	http://www.genome.jp/kegg-bin/show_pathway?mmu05231/mmu:23797%09red/mmu:74182%09red/mmu:18607%09red/mmu:212862%09red/mmu:18176%09red
Glucagon signaling pathway	KEGG PATHWAY	mmu04922	5	102	0.00429036	0.0132286	23797|16438|12914|19056|107476	http://www.genome.jp/kegg-bin/show_pathway?mmu04922/mmu:23797%09red/mmu:12914%09red/mmu:16438%09red/mmu:19056%09red/mmu:107476%09red
AGE-RAGE signaling pathway in diabetic complications	KEGG PATHWAY	mmu04933	5	103	0.00446293	0.0135722	23797|11607|29857|22340|16653	http://www.genome.jp/kegg-bin/show_pathway?mmu04933/mmu:23797%09red/mmu:29857%09red/mmu:11607%09red/mmu:18176%09red/mmu:22340%09red
Long-term potentiation	KEGG PATHWAY	mmu04720	4	66	0.0051577	0.0154731	16653|16438|12914|19056	http://www.genome.jp/kegg-bin/show_pathway?mmu04720/mmu:12914%09red/mmu:16438%09red/mmu:19056%09red/mmu:18176%09red
Fc epsilon RI signaling pathway	KEGG PATHWAY	mmu04664	4	69	0.00598309	0.0176006	23797|29857|18607|16653	http://www.genome.jp/kegg-bin/show_pathway?mmu04664/mmu:23797%09red/mmu:18607%09red/mmu:18176%09red/mmu:29857%09red
Insulin resistance	KEGG PATHWAY	mmu04931	5	111	0.00602545	0.0176006	23797|16337|18607|56637|20787	http://www.genome.jp/kegg-bin/show_pathway?mmu04931/mmu:23797%09red/mmu:18607%09red/mmu:20787%09red/mmu:16337%09red/mmu:56637%09red
Adherens junction	KEGG PATHWAY	mmu04520	4	74	0.00754594	0.0217558	12385|12387|12914|16337	http://www.genome.jp/kegg-bin/show_pathway?mmu04520/mmu:12914%09red/mmu:12387%09red/mmu:16337%09red/mmu:12385%09red
Protein processing in endoplasmic reticulum	KEGG PATHWAY	mmu04141	6	167	0.00770403	0.0219269	27103|66890|66530|16430|223455|50527	http://www.genome.jp/kegg-bin/show_pathway?mmu04141/mmu:66890%09red/mmu:27103%09red/mmu:16430%09red/mmu:66530%09red/mmu:50527%09red/mmu:223455%09red
B cell receptor signaling pathway	KEGG PATHWAY	mmu04662	4	75	0.0078877	0.0221654	23797|16653|19056|56637	http://www.genome.jp/kegg-bin/show_pathway?mmu04662/mmu:23797%09red/mmu:19056%09red/mmu:18176%09red/mmu:56637%09red
Leukocyte transendothelial migration	KEGG PATHWAY	mmu04670	5	121	0.00847457	0.0235169	12385|12387|29857|20315|14678	http://www.genome.jp/kegg-bin/show_pathway?mmu04670/mmu:12385%09red/mmu:14678%09red/mmu:12387%09red/mmu:29857%09red/mmu:20315%09red
Neurotrophin signaling pathway	KEGG PATHWAY	mmu04722	5	122	0.00875223	0.0239876	23797|16653|29857|18607|56637	http://www.genome.jp/kegg-bin/show_pathway?mmu04722/mmu:23797%09red/mmu:18607%09red/mmu:29857%09red/mmu:18176%09red/mmu:56637%09red
Salivary secretion	KEGG PATHWAY	mmu04970	4	78	0.0089735	0.0242941	22318|16438|224129|381290	http://www.genome.jp/kegg-bin/show_pathway?mmu04970/mmu:16438%09red/mmu:224129%09red/mmu:22318%09red/mmu:381290%09red
Cell cycle	KEGG PATHWAY	mmu04110	5	125	0.00962281	0.0257381	12444|69010|12914|56637|59008	http://www.genome.jp/kegg-bin/show_pathway?mmu04110/mmu:12914%09red/mmu:12444%09red/mmu:59008%09red/mmu:69010%09red/mmu:56637%09red
Cardiac muscle contraction	KEGG PATHWAY	mmu04260	4	80	0.00974891	0.025765	12859|22273|12293|17896	http://www.genome.jp/kegg-bin/show_pathway?mmu04260/mmu:22273%09red/mmu:12293%09red/mmu:12859%09red/mmu:17896%09red
Epstein-Barr virus infection	KEGG PATHWAY	mmu05169	7	232	0.0100574	0.0262676	23797|27103|29857|20022|12914|56637|252870	http://www.genome.jp/kegg-bin/show_pathway?mmu05169/mmu:252870%09red/mmu:23797%09red/mmu:12914%09red/mmu:56637%09red/mmu:20022%09red/mmu:27103%09red/mmu:29857%09red
Vascular smooth muscle contraction	KEGG PATHWAY	mmu04270	5	128	0.0105511	0.0271055	107589|238564|11607|16438|224129	http://www.genome.jp/kegg-bin/show_pathway?mmu04270/mmu:224129%09red/mmu:16438%09red/mmu:107589%09red/mmu:11607%09red/mmu:238564%09red
Vasopressin-regulated water reabsorption	KEGG PATHWAY	mmu04962	3	43	0.0106224	0.0271055	19344|22318|19345	http://www.genome.jp/kegg-bin/show_pathway?mmu04962/mmu:19345%09red/mmu:19344%09red/mmu:22318%09red
Endocytosis	KEGG PATHWAY	mmu04144	8	294	0.0108439	0.0273562	12389|14773|19344|19345|58194|56378|19158|228998	http://www.genome.jp/kegg-bin/show_pathway?mmu04144/mmu:19158%09red/mmu:58194%09red/mmu:19345%09red/mmu:19344%09red/mmu:228998%09red/mmu:56378%09red/mmu:12389%09red/mmu:14773%09red
Hedgehog signaling pathway	KEGG PATHWAY	mmu04340	3	44	0.011265	0.0280992	214897|12444|56637	http://www.genome.jp/kegg-bin/show_pathway?mmu04340/mmu:214897%09red/mmu:12444%09red/mmu:56637%09red
Osteoclast differentiation	KEGG PATHWAY	mmu04380	5	133	0.0122314	0.029757	29857|23797|13038|19056|15980	http://www.genome.jp/kegg-bin/show_pathway?mmu04380/mmu:23797%09red/mmu:13038%09red/mmu:19056%09red/mmu:29857%09red/mmu:15980%09red
Serotonergic synapse	KEGG PATHWAY	mmu04726	5	133	0.0122314	0.029757	14707|16653|16438|224129|14678	http://www.genome.jp/kegg-bin/show_pathway?mmu04726/mmu:14678%09red/mmu:224129%09red/mmu:18176%09red/mmu:16438%09red/mmu:14707%09red
Gap junction	KEGG PATHWAY	mmu04540	4	86	0.0123317	0.029757	16653|16438|224129|14678	http://www.genome.jp/kegg-bin/show_pathway?mmu04540/mmu:14678%09red/mmu:224129%09red/mmu:18176%09red/mmu:16438%09red
Dilated cardiomyopathy	KEGG PATHWAY	mmu05414	4	90	0.0142752	0.0340762	12293|24052|17868|224129	http://www.genome.jp/kegg-bin/show_pathway?mmu05414/mmu:17868%09red/mmu:224129%09red/mmu:24052%09red/mmu:12293%09red
Measles	KEGG PATHWAY	mmu05162	5	139	0.0144763	0.0341887	23797|12444|27103|56637|15980	http://www.genome.jp/kegg-bin/show_pathway?mmu05162/mmu:23797%09red/mmu:27103%09red/mmu:12444%09red/mmu:56637%09red/mmu:15980%09red
Ubiquitin mediated proteolysis	KEGG PATHWAY	mmu04120	5	145	0.0169822	0.0396847	22214|69010|69288|67615|59008	http://www.genome.jp/kegg-bin/show_pathway?mmu04120/mmu:59008%09red/mmu:69288%09red/mmu:22214%09red/mmu:69010%09red/mmu:67615%09red
Wnt signaling pathway	KEGG PATHWAY	mmu04310	5	146	0.017426	0.0402977	12387|19056|12914|12444|56637	http://www.genome.jp/kegg-bin/show_pathway?mmu04310/mmu:19056%09red/mmu:12914%09red/mmu:12444%09red/mmu:12387%09red/mmu:56637%09red
Circadian entrainment	KEGG PATHWAY	mmu04713	4	98	0.0187181	0.0428393	14707|16438|224129|14678	http://www.genome.jp/kegg-bin/show_pathway?mmu04713/mmu:14678%09red/mmu:224129%09red/mmu:16438%09red/mmu:14707%09red
Non-small cell lung cancer	KEGG PATHWAY	mmu05223	3	56	0.0207151	0.046926	23797|16653|18607	http://www.genome.jp/kegg-bin/show_pathway?mmu05223/mmu:23797%09red/mmu:18607%09red/mmu:18176%09red
Hippo signaling pathway	KEGG PATHWAY	mmu04390	5	154	0.0212546	0.0476618	12385|12387|12444|18016|56637	http://www.genome.jp/kegg-bin/show_pathway?mmu04390/mmu:12385%09red/mmu:12444%09red/mmu:12387%09red/mmu:18016%09red/mmu:56637%09red
Glycosaminoglycan degradation	KEGG PATHWAY	mmu00531	2	21	0.0214959	0.0477208	15931|15587	http://www.genome.jp/kegg-bin/show_pathway?mmu00531/mmu:15931%09red/mmu:15587%09red
Chagas disease (American trypanosomiasis)	KEGG PATHWAY	mmu05142	4	104	0.0225544	0.0495751	23797|29857|15980|14678	http://www.genome.jp/kegg-bin/show_pathway?mmu05142/mmu:23797%09red/mmu:29857%09red/mmu:14678%09red/mmu:15980%09red
Glycerolipid metabolism	KEGG PATHWAY	mmu00561	3	59	0.0235863	0.0513348	55979|67512|102247	http://www.genome.jp/kegg-bin/show_pathway?mmu00561/mmu:55979%09red/mmu:67512%09red/mmu:102247%09red
Regulation of actin cytoskeleton	KEGG PATHWAY	mmu04810	6	218	0.0245311	0.0528729	107589|238564|16653|56378|243764|20130	http://www.genome.jp/kegg-bin/show_pathway?mmu04810/mmu:243764%09red/mmu:238564%09red/mmu:18176%09red/mmu:20130%09red/mmu:56378%09red/mmu:107589%09red
Long-term depression	KEGG PATHWAY	mmu04730	3	61	0.025614	0.054676	16438|16653|14678	http://www.genome.jp/kegg-bin/show_pathway?mmu04730/mmu:14678%09red/mmu:18176%09red/mmu:16438%09red
Herpes simplex infection	KEGG PATHWAY	mmu05168	6	224	0.0274444	0.0580252	27103|12914|67615|252870|68077|15980	http://www.genome.jp/kegg-bin/show_pathway?mmu05168/mmu:252870%09red/mmu:15980%09red/mmu:68077%09red/mmu:12914%09red/mmu:27103%09red/mmu:67615%09red
Colorectal cancer	KEGG PATHWAY	mmu05210	3	64	0.0288255	0.0603704	23797|12387|56637	http://www.genome.jp/kegg-bin/show_pathway?mmu05210/mmu:23797%09red/mmu:12387%09red/mmu:56637%09red
Central carbon metabolism in cancer	KEGG PATHWAY	mmu05230	3	66	0.0310794	0.0644825	23797|228026|16653	http://www.genome.jp/kegg-bin/show_pathway?mmu05230/mmu:23797%09red/mmu:18176%09red/mmu:228026%09red
p53 signaling pathway	KEGG PATHWAY	mmu04115	3	68	0.0334232	0.0680728	12444|16009|64058	http://www.genome.jp/kegg-bin/show_pathway?mmu04115/mmu:16009%09red/mmu:12444%09red/mmu:64058%09red
Renal cell carcinoma	KEGG PATHWAY	mmu05211	3	68	0.0334232	0.0680728	23797|12914|16653	http://www.genome.jp/kegg-bin/show_pathway?mmu05211/mmu:23797%09red/mmu:12914%09red/mmu:18176%09red
Biosynthesis of unsaturated fatty acids	KEGG PATHWAY	mmu01040	2	28	0.0353284	0.0712991	11430|20250	http://www.genome.jp/kegg-bin/show_pathway?mmu01040/mmu:11430%09red/mmu:20250%09red
Thyroid cancer	KEGG PATHWAY	mmu05216	2	29	0.0375229	0.0750459	12387|16653	http://www.genome.jp/kegg-bin/show_pathway?mmu05216/mmu:12387%09red/mmu:18176%09red
Lysosome	KEGG PATHWAY	mmu04142	4	124	0.0386046	0.0765199	13030|15931|106039|13038	http://www.genome.jp/kegg-bin/show_pathway?mmu04142/mmu:13038%09red/mmu:15931%09red/mmu:106039%09red/mmu:13030%09red
Glyoxylate and dicarboxylate metabolism	KEGG PATHWAY	mmu00630	2	30	0.0397683	0.0774436	17448|11428	http://www.genome.jp/kegg-bin/show_pathway?mmu00630/mmu:11428%09red/mmu:17448%09red
RNA polymerase	KEGG PATHWAY	mmu03020	2	30	0.0397683	0.0774436	20019|20022	http://www.genome.jp/kegg-bin/show_pathway?mmu03020/mmu:20019%09red/mmu:20022%09red
Inflammatory mediator regulation of TRP channels	KEGG PATHWAY	mmu04750	4	126	0.0404913	0.0781659	29857|16438|224129|18442	http://www.genome.jp/kegg-bin/show_pathway?mmu04750/mmu:224129%09red/mmu:29857%09red/mmu:16438%09red/mmu:18442%09red
Pertussis	KEGG PATHWAY	mmu05133	3	74	0.0409878	0.0784422	12258|29857|14678	http://www.genome.jp/kegg-bin/show_pathway?mmu05133/mmu:29857%09red/mmu:14678%09red/mmu:12258%09red
Salmonella infection	KEGG PATHWAY	mmu05132	3	78	0.0464683	0.0880428	56378|29857|15980	http://www.genome.jp/kegg-bin/show_pathway?mmu05132/mmu:56378%09red/mmu:29857%09red/mmu:15980%09red
SNARE interactions in vesicular transport	KEGG PATHWAY	mmu04130	2	33	0.0467975	0.0880428	22318|53612	http://www.genome.jp/kegg-bin/show_pathway?mmu04130/mmu:53612%09red/mmu:22318%09red

## Sheet: HypoTH+T3 vs HypoTH
##Databases: KEGG PATHWAY
##Statistical test method: hypergeometric test / Fisher's exact test
##FDR correction method: Benjamini and Hochberg
#Term	Database	ID	Input number	Background number	P-Value	Corrected P-Value	Input	Hyperlink
Citrate cycle (TCA cycle)	KEGG PATHWAY	mmu00020	9	32	7.01106e-13	1.09373e-10	11429|67834|17448|18597|68263|20916|12974|56451|235339	http://www.genome.jp/kegg-bin/show_pathway?mmu00020/mmu:68263%09red/mmu:17448%09red/mmu:11429%09red/mmu:67834%09red/mmu:56451%09red/mmu:20916%09red/mmu:235339%09red/mmu:12974%09red/mmu:18597%09red
Metabolic pathways	KEGG PATHWAY	mmu01100	31	1298	2.87287e-12	2.24084e-10	58875|20916|66144|11947|96979|16430|14718|23959|18597|56077|12039|66091|11429|235339|66445|73724|66377|18041|66054|67834|17448|11950|238505|12974|17993|108156|68263|58810|17308|56451|18784	http://www.genome.jp/kegg-bin/show_pathway?mmu01100/mmu:23959%09red/mmu:14718%09red/mmu:17448%09red/mmu:18041%09red/mmu:20916%09red/mmu:58875%09red/mmu:66091%09red/mmu:96979%09red/mmu:17993%09red/mmu:238505%09red/mmu:56451%09red/mmu:18784%09red/mmu:73724%09red/mmu:66445%09red/mmu:11947%09red/mmu:11429%09red/mmu:17308%09red/mmu:16430%09red/mmu:12039%09red/mmu:18597%09red/mmu:58810%09red/mmu:108156…
Carbon metabolism	KEGG PATHWAY	mmu01200	11	118	8.85106e-11	4.60255e-09	11429|67834|17448|18597|68263|20916|73724|14718|12974|56451|235339	http://www.genome.jp/kegg-bin/show_pathway?mmu01200/mmu:68263%09red/mmu:17448%09red/mmu:11429%09red/mmu:67834%09red/mmu:14718%09red/mmu:56451%09red/mmu:20916%09red/mmu:235339%09red/mmu:12974%09red/mmu:18597%09red/mmu:73724%09red
Parkinson's disease	KEGG PATHWAY	mmu05012	9	149	1.59046e-07	5.82497e-06	66091|17993|14678|11947|11950|22223|66445|224129|66377	http://www.genome.jp/kegg-bin/show_pathway?mmu05012/mmu:11947%09red/mmu:22223%09red/mmu:14678%09red/mmu:224129%09red/mmu:66091%09red/mmu:66445%09red/mmu:11950%09red/mmu:17993%09red/mmu:66377%09red
Adrenergic signaling in cardiomyocytes	KEGG PATHWAY	mmu04261	9	152	1.86698e-07	5.82497e-06	16509|16535|12293|14678|20266|11607|224129|11938|17896	http://www.genome.jp/kegg-bin/show_pathway?mmu04261/mmu:11607%09red/mmu:12293%09red/mmu:20266%09red/mmu:14678%09red/mmu:224129%09red/mmu:16509%09red/mmu:17896%09red/mmu:11938%09red/mmu:16535%09red
Pyruvate metabolism	KEGG PATHWAY	mmu00620	5	39	3.32207e-06	8.63739e-05	68263|17448|235339|52815|18597	http://www.genome.jp/kegg-bin/show_pathway?mmu00620/mmu:52815%09red/mmu:235339%09red/mmu:18597%09red/mmu:17448%09red/mmu:68263%09red
2-Oxocarboxylic acid metabolism	KEGG PATHWAY	mmu01210	4	20	6.93406e-06	0.000154531	11429|14718|12974|67834	http://www.genome.jp/kegg-bin/show_pathway?mmu01210/mmu:14718%09red/mmu:12974%09red/mmu:11429%09red/mmu:67834%09red
Oxidative phosphorylation	KEGG PATHWAY	mmu00190	7	139	1.21527e-05	0.000236978	66091|17993|66144|11947|11950|66445|66377	http://www.genome.jp/kegg-bin/show_pathway?mmu00190/mmu:11947%09red/mmu:66144%09red/mmu:66091%09red/mmu:66445%09red/mmu:11950%09red/mmu:17993%09red/mmu:66377%09red
Phospholipase D signaling pathway	KEGG PATHWAY	mmu04072	7	146	1.64706e-05	0.00028549	14674|56077|14816|11607|224129|19158|20130	http://www.genome.jp/kegg-bin/show_pathway?mmu04072/mmu:19158%09red/mmu:11607%09red/mmu:14674%09red/mmu:14816%09red/mmu:224129%09red/mmu:20130%09red/mmu:56077%09red
Glyoxylate and dicarboxylate metabolism	KEGG PATHWAY	mmu00630	4	30	2.90564e-05	0.000453279	11429|17448|12974|73724	http://www.genome.jp/kegg-bin/show_pathway?mmu00630/mmu:12974%09red/mmu:17448%09red/mmu:11429%09red/mmu:73724%09red
Propanoate metabolism	KEGG PATHWAY	mmu00640	4	31	3.26725e-05	0.000463355	12039|20916|56451|73724	http://www.genome.jp/kegg-bin/show_pathway?mmu00640/mmu:56451%09red/mmu:20916%09red/mmu:12039%09red/mmu:73724%09red
Alzheimer's disease	KEGG PATHWAY	mmu05010	7	177	5.36e-05	0.0006968	66091|17993|11947|11950|66445|11938|66377	http://www.genome.jp/kegg-bin/show_pathway?mmu05010/mmu:11947%09red/mmu:66091%09red/mmu:66445%09red/mmu:11938%09red/mmu:11950%09red/mmu:17993%09red/mmu:66377%09red
Biosynthesis of amino acids	KEGG PATHWAY	mmu01230	5	79	7.98086e-05	0.000957703	11429|14718|238505|67834|12974	http://www.genome.jp/kegg-bin/show_pathway?mmu01230/mmu:238505%09red/mmu:14718%09red/mmu:12974%09red/mmu:11429%09red/mmu:67834%09red
Axon guidance	KEGG PATHWAY	mmu04360	6	176	0.000398076	0.0044357	20315|14678|20354|20353|20130|140570	http://www.genome.jp/kegg-bin/show_pathway?mmu04360/mmu:14678%09red/mmu:20353%09red/mmu:20130%09red/mmu:140570%09red/mmu:20315%09red/mmu:20354%09red
Glycolysis / Gluconeogenesis	KEGG PATHWAY	mmu00010	4	66	0.000496459	0.00516317	68263|235339|18597|58810	http://www.genome.jp/kegg-bin/show_pathway?mmu00010/mmu:68263%09red/mmu:235339%09red/mmu:18597%09red/mmu:58810%09red
Huntington's disease	KEGG PATHWAY	mmu05016	6	199	0.000743872	0.00725275	66091|17993|11947|11950|66445|66377	http://www.genome.jp/kegg-bin/show_pathway?mmu05016/mmu:11947%09red/mmu:66091%09red/mmu:66445%09red/mmu:11950%09red/mmu:17993%09red/mmu:66377%09red
Cardiac muscle contraction	KEGG PATHWAY	mmu04260	4	80	0.000987321	0.00891679	12293|66445|17896|11938	http://www.genome.jp/kegg-bin/show_pathway?mmu04260/mmu:12293%09red/mmu:17896%09red/mmu:11938%09red/mmu:66445%09red
Tight junction	KEGG PATHWAY	mmu04530	5	141	0.00102886	0.00891679	68188|20130|17475|67268|14678	http://www.genome.jp/kegg-bin/show_pathway?mmu04530/mmu:17475%09red/mmu:14678%09red/mmu:68188%09red/mmu:20130%09red/mmu:67268%09red
Dilated cardiomyopathy	KEGG PATHWAY	mmu05414	4	90	0.00149879	0.0123058	12293|16420|224129|11938	http://www.genome.jp/kegg-bin/show_pathway?mmu05414/mmu:16420%09red/mmu:224129%09red/mmu:12293%09red/mmu:11938%09red
Non-alcoholic fatty liver disease (NAFLD)	KEGG PATHWAY	mmu04932	5	157	0.00163013	0.012715	66445|66377|66091|17993|20787	http://www.genome.jp/kegg-bin/show_pathway?mmu04932/mmu:20787%09red/mmu:66445%09red/mmu:17993%09red/mmu:66091%09red/mmu:66377%09red
Pancreatic secretion	KEGG PATHWAY	mmu04972	4	103	0.00240716	0.0171852	16535|18784|224129|11938	http://www.genome.jp/kegg-bin/show_pathway?mmu04972/mmu:18784%09red/mmu:224129%09red/mmu:16535%09red/mmu:11938%09red
cGMP-PKG signaling pathway	KEGG PATHWAY	mmu04022	5	173	0.0024565	0.0171852	14678|11607|14674|224129|11938	http://www.genome.jp/kegg-bin/show_pathway?mmu04022/mmu:11607%09red/mmu:14678%09red/mmu:224129%09red/mmu:14674%09red/mmu:11938%09red
Cysteine and methionine metabolism	KEGG PATHWAY	mmu00270	3	49	0.00253372	0.0171852	14718|17448|238505	http://www.genome.jp/kegg-bin/show_pathway?mmu00270/mmu:238505%09red/mmu:14718%09red/mmu:17448%09red
Valine, leucine and isoleucine degradation	KEGG PATHWAY	mmu00280	3	56	0.00362928	0.0235903	58875|12039|73724	http://www.genome.jp/kegg-bin/show_pathway?mmu00280/mmu:12039%09red/mmu:58875%09red/mmu:73724%09red
cAMP signaling pathway	KEGG PATHWAY	mmu04024	5	198	0.0043026	0.0263696	14678|20130|224129|15166|11938	http://www.genome.jp/kegg-bin/show_pathway?mmu04024/mmu:14678%09red/mmu:224129%09red/mmu:20130%09red/mmu:11938%09red/mmu:15166%09red
Platelet activation	KEGG PATHWAY	mmu04611	4	123	0.00444898	0.0263696	14674|224129|67268|14678	http://www.genome.jp/kegg-bin/show_pathway?mmu04611/mmu:14678%09red/mmu:224129%09red/mmu:14674%09red/mmu:67268%09red
Long-term depression	KEGG PATHWAY	mmu04730	3	61	0.00456396	0.0263696	14816|14674|14678	http://www.genome.jp/kegg-bin/show_pathway?mmu04730/mmu:14816%09red/mmu:14678%09red/mmu:14674%09red
Vascular smooth muscle contraction	KEGG PATHWAY	mmu04270	4	128	0.0050985	0.0284059	11607|14674|224129|18784	http://www.genome.jp/kegg-bin/show_pathway?mmu04270/mmu:11607%09red/mmu:18784%09red/mmu:224129%09red/mmu:14674%09red
One carbon pool by folate	KEGG PATHWAY	mmu00670	2	19	0.0052881	0.0284463	108156|238505	http://www.genome.jp/kegg-bin/show_pathway?mmu00670/mmu:238505%09red/mmu:108156%09red
p53 signaling pathway	KEGG PATHWAY	mmu04115	3	68	0.00609708	0.0317048	140742|26374|13197	http://www.genome.jp/kegg-bin/show_pathway?mmu04115/mmu:26374%09red/mmu:13197%09red/mmu:140742%09red
Regulation of actin cytoskeleton	KEGG PATHWAY	mmu04810	5	218	0.00636516	0.0320311	14674|20130|16420|20430|67268	http://www.genome.jp/kegg-bin/show_pathway?mmu04810/mmu:16420%09red/mmu:20430%09red/mmu:14674%09red/mmu:20130%09red/mmu:67268%09red
Renin secretion	KEGG PATHWAY	mmu04924	3	72	0.00709517	0.0345889	11607|224129|14678	http://www.genome.jp/kegg-bin/show_pathway?mmu04924/mmu:11607%09red/mmu:14678%09red/mmu:224129%09red
Gastric acid secretion	KEGG PATHWAY	mmu04971	3	73	0.00735889	0.0347875	14678|224129|16535	http://www.genome.jp/kegg-bin/show_pathway?mmu04971/mmu:14678%09red/mmu:224129%09red/mmu:16535%09red
Arrhythmogenic right ventricular cardiomyopathy (ARVC)	KEGG PATHWAY	mmu05412	3	74	0.00762834	0.0350006	12293|16420|11938	http://www.genome.jp/kegg-bin/show_pathway?mmu05412/mmu:16420%09red/mmu:12293%09red/mmu:11938%09red
Oxytocin signaling pathway	KEGG PATHWAY	mmu04921	4	158	0.01035	0.0461251	12293|13629|224129|14678	http://www.genome.jp/kegg-bin/show_pathway?mmu04921/mmu:14678%09red/mmu:224129%09red/mmu:12293%09red/mmu:13629%09red
Hypertrophic cardiomyopathy (HCM)	KEGG PATHWAY	mmu05410	3	84	0.0106443	0.0461251	12293|16420|11938	http://www.genome.jp/kegg-bin/show_pathway?mmu05410/mmu:16420%09red/mmu:12293%09red/mmu:11938%09red
Gap junction	KEGG PATHWAY	mmu04540	3	86	0.0113188	0.0477223	14816|224129|14678	http://www.genome.jp/kegg-bin/show_pathway?mmu04540/mmu:14816%09red/mmu:14678%09red/mmu:224129%09red
MAPK signaling pathway	KEGG PATHWAY	mmu04010	5	254	0.0116713	0.0479137	12293|20130|13197|319520|18015	http://www.genome.jp/kegg-bin/show_pathway?mmu04010/mmu:319520%09red/mmu:12293%09red/mmu:13197%09red/mmu:20130%09red/mmu:18015%09red
RNA transport	KEGG PATHWAY	mmu03013	4	170	0.013167	0.052668	269113|22218|331401|20430	http://www.genome.jp/kegg-bin/show_pathway?mmu03013/mmu:22218%09red/mmu:20430%09red/mmu:269113%09red/mmu:331401%09red
Glycerophospholipid metabolism	KEGG PATHWAY	mmu00564	3	94	0.0142594	0.0556118	56077|74182|18784	http://www.genome.jp/kegg-bin/show_pathway?mmu00564/mmu:74182%09red/mmu:56077%09red/mmu:18784%09red
Estrogen signaling pathway	KEGG PATHWAY	mmu04915	3	98	0.015877	0.0604099	14816|224129|14678	http://www.genome.jp/kegg-bin/show_pathway?mmu04915/mmu:14816%09red/mmu:14678%09red/mmu:224129%09red
Calcium signaling pathway	KEGG PATHWAY	mmu04020	4	182	0.0164306	0.0610278	18682|14816|11607|11938	http://www.genome.jp/kegg-bin/show_pathway?mmu04020/mmu:14816%09red/mmu:11607%09red/mmu:18682%09red/mmu:11938%09red
Glucagon signaling pathway	KEGG PATHWAY	mmu04922	3	102	0.0175935	0.0638277	68263|18682|18597	http://www.genome.jp/kegg-bin/show_pathway?mmu04922/mmu:68263%09red/mmu:18597%09red/mmu:18682%09red
Retrograde endocannabinoid signaling	KEGG PATHWAY	mmu04723	3	103	0.0180382	0.0639536	14816|224129|14678	http://www.genome.jp/kegg-bin/show_pathway?mmu04723/mmu:14816%09red/mmu:14678%09red/mmu:224129%09red
HIF-1 signaling pathway	KEGG PATHWAY	mmu04066	3	110	0.0213254	0.0729474	68263|18597|15980	http://www.genome.jp/kegg-bin/show_pathway?mmu04066/mmu:68263%09red/mmu:18597%09red/mmu:15980%09red
Chemokine signaling pathway	KEGG PATHWAY	mmu04062	4	198	0.0215101	0.0729474	57266|224129|20315|14678	http://www.genome.jp/kegg-bin/show_pathway?mmu04062/mmu:57266%09red/mmu:224129%09red/mmu:14678%09red/mmu:20315%09red
Cholinergic synapse	KEGG PATHWAY	mmu04725	3	113	0.0228279	0.0757691	14678|224129|16535	http://www.genome.jp/kegg-bin/show_pathway?mmu04725/mmu:14678%09red/mmu:224129%09red/mmu:16535%09red
Glutamatergic synapse	KEGG PATHWAY	mmu04724	3	115	0.0238607	0.0775474	14816|224129|14678	http://www.genome.jp/kegg-bin/show_pathway?mmu04724/mmu:14816%09red/mmu:14678%09red/mmu:224129%09red
Leukocyte transendothelial migration	KEGG PATHWAY	mmu04670	3	121	0.0271091	0.0863065	67268|20315|14678	http://www.genome.jp/kegg-bin/show_pathway?mmu04670/mmu:14678%09red/mmu:67268%09red/mmu:20315%09red
N-Glycan biosynthesis	KEGG PATHWAY	mmu00510	2	49	0.0290032	0.0887155	17308|16430	http://www.genome.jp/kegg-bin/show_pathway?mmu00510/mmu:16430%09red/mmu:17308%09red
Cocaine addiction	KEGG PATHWAY	mmu05030	2	49	0.0290032	0.0887155	224129|14678	http://www.genome.jp/kegg-bin/show_pathway?mmu05030/mmu:14678%09red/mmu:224129%09red
Arginine and proline metabolism	KEGG PATHWAY	mmu00330	2	51	0.0311359	0.0934077	14718|66054	http://www.genome.jp/kegg-bin/show_pathway?mmu00330/mmu:14718%09red/mmu:66054%09red
Ras signaling pathway	KEGG PATHWAY	mmu04014	4	231	0.0347469	0.102274	20130|66482|18015|18784	http://www.genome.jp/kegg-bin/show_pathway?mmu04014/mmu:18784%09red/mmu:20130%09red/mmu:66482%09red/mmu:18015%09red
Regulation of lipolysis in adipocytes	KEGG PATHWAY	mmu04923	2	57	0.0378887	0.109456	224129|14678	http://www.genome.jp/kegg-bin/show_pathway?mmu04923/mmu:14678%09red/mmu:224129%09red
Glycerolipid metabolism	KEGG PATHWAY	mmu00561	2	59	0.040253	0.114172	56077|58810	http://www.genome.jp/kegg-bin/show_pathway?mmu00561/mmu:56077%09red/mmu:58810%09red
Ubiquitin mediated proteolysis	KEGG PATHWAY	mmu04120	3	145	0.0423257	0.117907	26374|17999|216080	http://www.genome.jp/kegg-bin/show_pathway?mmu04120/mmu:216080%09red/mmu:26374%09red/mmu:17999%09red
Central carbon metabolism in cancer	KEGG PATHWAY	mmu05230	2	66	0.0489471	0.131651	68263|18597	http://www.genome.jp/kegg-bin/show_pathway?mmu05230/mmu:68263%09red/mmu:18597%09red
Aminoacyl-tRNA biosynthesis	KEGG PATHWAY	mmu00970	2	66	0.0489471	0.131651	69955|70791	http://www.genome.jp/kegg-bin/show_pathway?mmu00970/mmu:69955%09red/mmu:70791%09red

## Sheet: HyperTH vs HypoTH
##Databases: KEGG PATHWAY
##Statistical test method: hypergeometric test / Fisher's exact test
##FDR correction method: Benjamini and Hochberg
#Term	Database	ID	Input number	Background number	P-Value	Corrected P-Value	Input	Hyperlink
Metabolic pathways	KEGG PATHWAY	mmu01100	68	1298	1.53516e-15	3.65369e-13	70266|20916|18720|67273|52064|15926|96979|20603|108682|56386|18293|23959|14718|20019|11564|67003|12039|11992|216739|52123|74340|12036|103988|11429|11428|235339|270076|73724|110911|66445|67512|320404|71780|18655|56219|67834|239017|14645|17448|66916|238505|67870|66588|80914|16430|11689|13806|78920|269951|72947|109264|17993|102247|27402|108156|74185|100705|14466|68194|68263|74596|14245|20020|78929|1…	http://www.genome.jp/kegg-bin/show_pathway?mmu01100/mmu:23959%09red/mmu:14718%09red/mmu:14645%09red/mmu:66445%09red/mmu:17448%09red/mmu:80914%09red/mmu:70266%09red/mmu:74185%09red/mmu:18293%09red/mmu:20916%09red/mmu:11430%09red/mmu:67003%09red/mmu:11992%09red/mmu:216739%09red/mmu:56386%09red/mmu:67512%09red/mmu:18720%09red/mmu:11689%09red/mmu:96979%09red/mmu:17993%09red/mmu:102247%09red/mmu:23850…
Carbon metabolism	KEGG PATHWAY	mmu01200	20	118	2.08847e-13	2.48528e-11	18655|11429|109264|20916|239017|18293|67834|11428|17448|15926|68263|108682|235339|73724|103988|14718|13806|56451|78920|269951	http://www.genome.jp/kegg-bin/show_pathway?mmu01200/mmu:14718%09red/mmu:433182%09red/mmu:269951%09red/mmu:67834%09red/mmu:68263%09red/mmu:78920%09red/mmu:20916%09red/mmu:73724%09red/mmu:235339%09red/mmu:11429%09red/mmu:108682%09red/mmu:11428%09red/mmu:18655%09red/mmu:18293%09red/mmu:17448%09red/mmu:239017%09red/mmu:109264%09red/mmu:56451%09red/mmu:103988%09red/mmu:15926%09red
Citrate cycle (TCA cycle)	KEGG PATHWAY	mmu00020	13	32	3.14159e-13	2.49233e-11	11429|67834|20916|239017|17448|15926|68263|11428|235339|18293|56451|78920|269951	http://www.genome.jp/kegg-bin/show_pathway?mmu00020/mmu:68263%09red/mmu:17448%09red/mmu:269951%09red/mmu:67834%09red/mmu:235339%09red/mmu:20916%09red/mmu:78920%09red/mmu:11429%09red/mmu:11428%09red/mmu:239017%09red/mmu:56451%09red/mmu:18293%09red/mmu:15926%09red
2-Oxocarboxylic acid metabolism	KEGG PATHWAY	mmu01210	8	20	1.34652e-08	8.01179e-07	67834|11428|15926|12036|11429|108682|14718|269951	http://www.genome.jp/kegg-bin/show_pathway?mmu01210/mmu:14718%09red/mmu:11428%09red/mmu:269951%09red/mmu:67834%09red/mmu:11429%09red/mmu:108682%09red/mmu:12036%09red/mmu:15926%09red
Axon guidance	KEGG PATHWAY	mmu04360	17	176	3.21287e-08	1.52933e-06	13845|69632|20315|14678|319757|20347|16653|56637|14083|171171|228026|12632|13641|12540|20348|20130|140570	http://www.genome.jp/kegg-bin/show_pathway?mmu04360/mmu:12632%09red/mmu:171171%09red/mmu:20348%09red/mmu:319757%09red/mmu:14678%09red/mmu:18176%09red/mmu:14083%09red/mmu:12540%09red/mmu:56637%09red/mmu:13641%09red/mmu:69632%09red/mmu:20130%09red/mmu:140570%09red/mmu:20315%09red/mmu:13845%09red/mmu:20347%09red/mmu:228026%09red
Biosynthesis of amino acids	KEGG PATHWAY	mmu01230	12	79	4.06e-08	1.61047e-06	18655|67834|14645|15926|11428|12036|11429|108682|238505|14718|13806|269951	http://www.genome.jp/kegg-bin/show_pathway?mmu01230/mmu:238505%09red/mmu:14718%09red/mmu:14645%09red/mmu:433182%09red/mmu:269951%09red/mmu:67834%09red/mmu:11429%09red/mmu:108682%09red/mmu:18655%09red/mmu:11428%09red/mmu:12036%09red/mmu:15926%09red
Focal adhesion	KEGG PATHWAY	mmu04510	17	203	2.15137e-07	7.31465e-06	238564|16779|70549|22371|56637|12830|109905|14083|67268|12540|12334|109700|12843|11651|16420|170736|12845	http://www.genome.jp/kegg-bin/show_pathway?mmu04510/mmu:12843%09red/mmu:109905%09red/mmu:109700%09red/mmu:12845%09red/mmu:238564%09red/mmu:16779%09red/mmu:12334%09red/mmu:22371%09red/mmu:12540%09red/mmu:56637%09red/mmu:12830%09red/mmu:14083%09red/mmu:11651%09red/mmu:70549%09red/mmu:16420%09red/mmu:67268%09red/mmu:170736%09red
Platelet activation	KEGG PATHWAY	mmu04611	13	123	5.19482e-07	1.54546e-05	238564|70549|69632|14678|22371|67268|11512|109905|224129|18441|12843|11651|14062	http://www.genome.jp/kegg-bin/show_pathway?mmu04611/mmu:12843%09red/mmu:224129%09red/mmu:238564%09red/mmu:14678%09red/mmu:22371%09red/mmu:14062%09red/mmu:67268%09red/mmu:11512%09red/mmu:69632%09red/mmu:11651%09red/mmu:70549%09red/mmu:18441%09red/mmu:109905%09red
Chemokine signaling pathway	KEGG PATHWAY	mmu04062	16	198	7.56755e-07	2.0012e-05	56744|11651|20315|14678|57266|16653|109905|56637|11512|66102|14083|224129|20851|12540|140580|16452	http://www.genome.jp/kegg-bin/show_pathway?mmu04062/mmu:56744%09red/mmu:57266%09red/mmu:224129%09red/mmu:14678%09red/mmu:18176%09red/mmu:12540%09red/mmu:56637%09red/mmu:11512%09red/mmu:66102%09red/mmu:14083%09red/mmu:11651%09red/mmu:20315%09red/mmu:140580%09red/mmu:20851%09red/mmu:109905%09red/mmu:16452%09red
Adrenergic signaling in cardiomyocytes	KEGG PATHWAY	mmu04261	14	152	8.82633e-07	2.10067e-05	20191|16509|14678|12293|16535|11512|20266|224129|20541|67972|399548|11651|17896|226849	http://www.genome.jp/kegg-bin/show_pathway?mmu04261/mmu:67972%09red/mmu:20266%09red/mmu:226849%09red/mmu:14678%09red/mmu:224129%09red/mmu:20541%09red/mmu:399548%09red/mmu:11512%09red/mmu:17896%09red/mmu:11651%09red/mmu:16509%09red/mmu:20191%09red/mmu:16535%09red/mmu:12293%09red
Pathways in cancer	KEGG PATHWAY	mmu05200	21	398	9.93621e-06	0.000214983	16779|112405|69632|20315|14678|12385|319757|269608|16653|56637|11512|12830|17685|14083|224129|20851|12978|12540|13617|11651|14062	http://www.genome.jp/kegg-bin/show_pathway?mmu05200/mmu:112405%09red/mmu:224129%09red/mmu:12830%09red/mmu:269608%09red/mmu:319757%09red/mmu:14678%09red/mmu:18176%09red/mmu:14062%09red/mmu:12540%09red/mmu:56637%09red/mmu:16779%09red/mmu:11512%09red/mmu:69632%09red/mmu:14083%09red/mmu:11651%09red/mmu:20315%09red/mmu:12385%09red/mmu:12978%09red/mmu:20851%09red/mmu:13617%09red/mmu:17685%09red
Insulin signaling pathway	KEGG PATHWAY	mmu04910	12	142	1.18747e-05	0.000235515	11651|106628|17346|103988|16653|56637|108099|14251|104215|20787|102093|100705	http://www.genome.jp/kegg-bin/show_pathway?mmu04910/mmu:100705%09red/mmu:14251%09red/mmu:106628%09red/mmu:103988%09red/mmu:18176%09red/mmu:56637%09red/mmu:108099%09red/mmu:102093%09red/mmu:11651%09red/mmu:20787%09red/mmu:17346%09red/mmu:104215%09red
cAMP signaling pathway	KEGG PATHWAY	mmu04024	14	198	1.52428e-05	0.000279061	239273|11651|20191|14678|54611|13617|15166|11512|109905|224129|67972|11430|20130|14062	http://www.genome.jp/kegg-bin/show_pathway?mmu04024/mmu:224129%09red/mmu:67972%09red/mmu:14678%09red/mmu:15166%09red/mmu:14062%09red/mmu:20130%09red/mmu:109905%09red/mmu:11430%09red/mmu:11512%09red/mmu:13617%09red/mmu:11651%09red/mmu:54611%09red/mmu:239273%09red/mmu:20191%09red
Ribosome	KEGG PATHWAY	mmu03010	12	148	1.7453e-05	0.0002967	68463|94062|68565|67427|66242|67891|100503670|76846|56284|67681|110954|68611	http://www.genome.jp/kegg-bin/show_pathway?mmu03010/mmu:67681%09red/mmu:100503670%09red/mmu:94062%09red/mmu:76846%09red/mmu:67891%09red/mmu:67427%09red/mmu:66242%09red/mmu:68463%09red/mmu:56284%09red/mmu:110954%09red/mmu:68565%09red/mmu:68611%09red
Complement and coagulation cascades	KEGG PATHWAY	mmu04610	9	87	3.42061e-05	0.000542738	74145|22371|21824|12258|12260|12509|12628|14062|12267	http://www.genome.jp/kegg-bin/show_pathway?mmu04610/mmu:74145%09red/mmu:12628%09red/mmu:22371%09red/mmu:21824%09red/mmu:14062%09red/mmu:12267%09red/mmu:12260%09red/mmu:12258%09red/mmu:12509%09red
Cysteine and methionine metabolism	KEGG PATHWAY	mmu00270	7	49	4.01317e-05	0.00059696	20603|74340|12036|238505|67870|17448|14718	http://www.genome.jp/kegg-bin/show_pathway?mmu00270/mmu:238505%09red/mmu:14718%09red/mmu:17448%09red/mmu:74340%09red/mmu:20603%09red/mmu:12036%09red/mmu:67870%09red
PI3K-Akt signaling pathway	KEGG PATHWAY	mmu04151	18	350	5.75203e-05	0.00077464	16779|11651|21687|75705|14062|22371|16653|56637|12830|14083|12978|12843|109700|16452|16420|226849|14600|12845	http://www.genome.jp/kegg-bin/show_pathway?mmu04151/mmu:12843%09red/mmu:22371%09red/mmu:12845%09red/mmu:109700%09red/mmu:16779%09red/mmu:16420%09red/mmu:226849%09red/mmu:18176%09red/mmu:14062%09red/mmu:14083%09red/mmu:56637%09red/mmu:12830%09red/mmu:14600%09red/mmu:75705%09red/mmu:11651%09red/mmu:21687%09red/mmu:16452%09red/mmu:12978%09red
Renin secretion	KEGG PATHWAY	mmu04924	8	72	5.85862e-05	0.00077464	14678|54611|13617|11512|18575|11606|224129|13030	http://www.genome.jp/kegg-bin/show_pathway?mmu04924/mmu:13030%09red/mmu:11606%09red/mmu:13617%09red/mmu:224129%09red/mmu:11512%09red/mmu:54611%09red/mmu:18575%09red/mmu:14678%09red
Phospholipase D signaling pathway	KEGG PATHWAY	mmu04072	11	146	7.21736e-05	0.00086289	11651|18720|52123|16653|11512|14816|224129|19158|67512|20130|14062	http://www.genome.jp/kegg-bin/show_pathway?mmu04072/mmu:19158%09red/mmu:52123%09red/mmu:224129%09red/mmu:14816%09red/mmu:18176%09red/mmu:14062%09red/mmu:20130%09red/mmu:11512%09red/mmu:67512%09red/mmu:18720%09red/mmu:11651%09red
cGMP-PKG signaling pathway	KEGG PATHWAY	mmu04022	12	173	7.25117e-05	0.00086289	238564|105675|14678|54611|13617|11512|19735|224129|20541|67972|22335|11651	http://www.genome.jp/kegg-bin/show_pathway?mmu04022/mmu:22335%09red/mmu:67972%09red/mmu:238564%09red/mmu:224129%09red/mmu:19735%09red/mmu:14678%09red/mmu:105675%09red/mmu:20541%09red/mmu:11512%09red/mmu:11651%09red/mmu:54611%09red/mmu:13617%09red
Pyruvate metabolism	KEGG PATHWAY	mmu00620	6	39	9.94809e-05	0.00112745	109264|17448|68263|235339|52815|100705	http://www.genome.jp/kegg-bin/show_pathway?mmu00620/mmu:100705%09red/mmu:68263%09red/mmu:17448%09red/mmu:235339%09red/mmu:52815%09red/mmu:109264%09red
Calcium signaling pathway	KEGG PATHWAY	mmu04020	12	182	0.000113955	0.00118497	238564|105675|20191|18575|13617|14816|20541|67972|22335|102093|14062|320404	http://www.genome.jp/kegg-bin/show_pathway?mmu04020/mmu:22335%09red/mmu:67972%09red/mmu:238564%09red/mmu:14816%09red/mmu:13617%09red/mmu:105675%09red/mmu:14062%09red/mmu:102093%09red/mmu:20541%09red/mmu:18575%09red/mmu:20191%09red/mmu:320404%09red
Pancreatic secretion	KEGG PATHWAY	mmu04972	9	103	0.000114514	0.00118497	20535|20191|16535|19340|11512|109905|224129|67972|18784	http://www.genome.jp/kegg-bin/show_pathway?mmu04972/mmu:67972%09red/mmu:20535%09red/mmu:224129%09red/mmu:11512%09red/mmu:109905%09red/mmu:18784%09red/mmu:19340%09red/mmu:20191%09red/mmu:16535%09red
Non-alcoholic fatty liver disease (NAFLD)	KEGG PATHWAY	mmu04932	11	157	0.000132107	0.00129402	67003|17993|67273|66916|12540|56637|108099|66445|20787|11651|68194	http://www.genome.jp/kegg-bin/show_pathway?mmu04932/mmu:67003%09red/mmu:68194%09red/mmu:12540%09red/mmu:56637%09red/mmu:108099%09red/mmu:66445%09red/mmu:11651%09red/mmu:20787%09red/mmu:67273%09red/mmu:66916%09red/mmu:17993%09red
Rap1 signaling pathway	KEGG PATHWAY	mmu04015	13	215	0.000135926	0.00129402	21687|70549|11651|14678|16653|11512|109905|224129|18441|12978|12540|20130|14062	http://www.genome.jp/kegg-bin/show_pathway?mmu04015/mmu:224129%09red/mmu:14678%09red/mmu:18176%09red/mmu:14062%09red/mmu:12540%09red/mmu:21687%09red/mmu:11512%09red/mmu:20130%09red/mmu:11651%09red/mmu:70549%09red/mmu:18441%09red/mmu:109905%09red/mmu:12978%09red
Regulation of actin cytoskeleton	KEGG PATHWAY	mmu04810	13	218	0.00015469	0.00141601	238564|18720|14062|16653|14083|12632|67268|20430|12540|109700|20130|16420|69632	http://www.genome.jp/kegg-bin/show_pathway?mmu04810/mmu:12632%09red/mmu:109700%09red/mmu:238564%09red/mmu:16420%09red/mmu:18176%09red/mmu:14083%09red/mmu:14062%09red/mmu:12540%09red/mmu:67268%09red/mmu:20430%09red/mmu:18720%09red/mmu:20130%09red/mmu:69632%09red
HIF-1 signaling pathway	KEGG PATHWAY	mmu04066	9	110	0.000181865	0.00160311	18655|21687|11651|17346|112405|68263|228026|13806|15980	http://www.genome.jp/kegg-bin/show_pathway?mmu04066/mmu:112405%09red/mmu:68263%09red/mmu:433182%09red/mmu:228026%09red/mmu:15980%09red/mmu:18655%09red/mmu:11651%09red/mmu:21687%09red/mmu:17346%09red
Protein processing in endoplasmic reticulum	KEGG PATHWAY	mmu04141	11	167	0.000219117	0.00180091	54609|27103|18415|19089|26400|16430|12334|22393|56445|50527|66890	http://www.genome.jp/kegg-bin/show_pathway?mmu04141/mmu:66890%09red/mmu:12334%09red/mmu:16430%09red/mmu:19089%09red/mmu:50527%09red/mmu:54609%09red/mmu:56445%09red/mmu:18415%09red/mmu:27103%09red/mmu:26400%09red/mmu:22393%09red
Toxoplasmosis	KEGG PATHWAY	mmu05145	9	113	0.000219439	0.00180091	105675|16779|11651|11689|14678|15944|16145|16452|15980	http://www.genome.jp/kegg-bin/show_pathway?mmu05145/mmu:15980%09red/mmu:16779%09red/mmu:14678%09red/mmu:105675%09red/mmu:15944%09red/mmu:11689%09red/mmu:11651%09red/mmu:16145%09red/mmu:16452%09red
Tight junction	KEGG PATHWAY	mmu04530	10	141	0.000240965	0.00191165	11651|211446|14678|12385|16653|67268|68188|12540|27428|20130	http://www.genome.jp/kegg-bin/show_pathway?mmu04530/mmu:211446%09red/mmu:14678%09red/mmu:18176%09red/mmu:20130%09red/mmu:67268%09red/mmu:12540%09red/mmu:11651%09red/mmu:27428%09red/mmu:12385%09red/mmu:68188%09red
Glyoxylate and dicarboxylate metabolism	KEGG PATHWAY	mmu00630	5	30	0.000274853	0.00211016	11429|17448|11428|73724|14645	http://www.genome.jp/kegg-bin/show_pathway?mmu00630/mmu:11428%09red/mmu:14645%09red/mmu:17448%09red/mmu:11429%09red/mmu:73724%09red
Propanoate metabolism	KEGG PATHWAY	mmu00640	5	31	0.000314825	0.00232061	12039|20916|56451|73724|100705	http://www.genome.jp/kegg-bin/show_pathway?mmu00640/mmu:100705%09red/mmu:56451%09red/mmu:20916%09red/mmu:12039%09red/mmu:73724%09red
Glycerophospholipid metabolism	KEGG PATHWAY	mmu00564	8	94	0.000321766	0.00232061	102247|52123|74182|74596|14245|110911|67512|18784	http://www.genome.jp/kegg-bin/show_pathway?mmu00564/mmu:52123%09red/mmu:102247%09red/mmu:14245%09red/mmu:74182%09red/mmu:18784%09red/mmu:67512%09red/mmu:110911%09red/mmu:74596%09red
Parkinson's disease	KEGG PATHWAY	mmu05012	10	149	0.000364365	0.00255055	105675|67003|17993|67273|14678|66916|224129|66445|22335|68194	http://www.genome.jp/kegg-bin/show_pathway?mmu05012/mmu:22335%09red/mmu:224129%09red/mmu:67003%09red/mmu:14678%09red/mmu:105675%09red/mmu:68194%09red/mmu:66445%09red/mmu:67273%09red/mmu:66916%09red/mmu:17993%09red
Prolactin signaling pathway	KEGG PATHWAY	mmu04917	7	74	0.000420165	0.00285712	11651|56468|16653|56637|20851|103988|16452	http://www.genome.jp/kegg-bin/show_pathway?mmu04917/mmu:103988%09red/mmu:18176%09red/mmu:56637%09red/mmu:11651%09red/mmu:56468%09red/mmu:20851%09red/mmu:16452%09red
Lysine degradation	KEGG PATHWAY	mmu00310	6	53	0.000451742	0.00298652	239017|110147|72947|270076|18293|78920	http://www.genome.jp/kegg-bin/show_pathway?mmu00310/mmu:72947%09red/mmu:110147%09red/mmu:270076%09red/mmu:78920%09red/mmu:239017%09red/mmu:18293%09red
AGE-RAGE signaling pathway in diabetic complications	KEGG PATHWAY	mmu04933	8	103	0.000568544	0.00365712	11651|16653|21824|12830|20851|12540|12843|16452	http://www.genome.jp/kegg-bin/show_pathway?mmu04933/mmu:12843%09red/mmu:18176%09red/mmu:12540%09red/mmu:12830%09red/mmu:11651%09red/mmu:21824%09red/mmu:20851%09red/mmu:16452%09red
ECM-receptor interaction	KEGG PATHWAY	mmu04512	7	83	0.000793762	0.00497146	16779|22371|12830|12843|109700|16420|12845	http://www.genome.jp/kegg-bin/show_pathway?mmu04512/mmu:12843%09red/mmu:12845%09red/mmu:109700%09red/mmu:16779%09red/mmu:16420%09red/mmu:22371%09red/mmu:12830%09red
Huntington's disease	KEGG PATHWAY	mmu05016	11	199	0.000880921	0.00537588	105675|67003|17993|67273|66916|67300|66445|67665|22335|20020|68194	http://www.genome.jp/kegg-bin/show_pathway?mmu05016/mmu:22335%09red/mmu:67003%09red/mmu:105675%09red/mmu:68194%09red/mmu:67665%09red/mmu:20020%09red/mmu:67300%09red/mmu:66445%09red/mmu:67273%09red/mmu:66916%09red/mmu:17993%09red
Dilated cardiomyopathy	KEGG PATHWAY	mmu05414	7	90	0.00123505	0.00734855	20191|12293|11512|224129|20541|109700|16420	http://www.genome.jp/kegg-bin/show_pathway?mmu05414/mmu:12293%09red/mmu:109700%09red/mmu:16420%09red/mmu:224129%09red/mmu:11512%09red/mmu:20541%09red/mmu:20191%09red
Purine metabolism	KEGG PATHWAY	mmu00230	10	179	0.00138116	0.00801746	54611|20020|78929|11512|18575|224129|23959|66355|20019|11564	http://www.genome.jp/kegg-bin/show_pathway?mmu00230/mmu:23959%09red/mmu:20020%09red/mmu:78929%09red/mmu:224129%09red/mmu:66355%09red/mmu:20019%09red/mmu:11564%09red/mmu:11512%09red/mmu:54611%09red/mmu:18575%09red
Hippo signaling pathway -multiple species	KEGG PATHWAY	mmu04392	4	26	0.0014981	0.00837338	213391|232157|18016|56274	http://www.genome.jp/kegg-bin/show_pathway?mmu04392/mmu:56274%09red/mmu:232157%09red/mmu:18016%09red/mmu:213391%09red
Leukocyte transendothelial migration	KEGG PATHWAY	mmu04670	8	121	0.00151284	0.00837338	21838|20315|14678|12385|67268|109905|14083|12540	http://www.genome.jp/kegg-bin/show_pathway?mmu04670/mmu:14678%09red/mmu:12540%09red/mmu:67268%09red/mmu:14083%09red/mmu:20315%09red/mmu:21838%09red/mmu:12385%09red/mmu:109905%09red
Endocrine resistance	KEGG PATHWAY	mmu01522	7	95	0.00165336	0.0089432	20185|17979|16653|11512|14083|224129|11651	http://www.genome.jp/kegg-bin/show_pathway?mmu01522/mmu:18176%09red/mmu:224129%09red/mmu:14083%09red/mmu:11512%09red/mmu:11651%09red/mmu:17979%09red/mmu:20185%09red
Estrogen signaling pathway	KEGG PATHWAY	mmu04915	7	98	0.00195263	0.0103272	14678|14228|16653|11512|14816|224129|11651	http://www.genome.jp/kegg-bin/show_pathway?mmu04915/mmu:224129%09red/mmu:14816%09red/mmu:14678%09red/mmu:18176%09red/mmu:11512%09red/mmu:11651%09red/mmu:14228%09red
Oxytocin signaling pathway	KEGG PATHWAY	mmu04921	9	158	0.00208281	0.0106616	238564|20191|14678|19735|16653|108099|12293|224129|11512	http://www.genome.jp/kegg-bin/show_pathway?mmu04921/mmu:224129%09red/mmu:12293%09red/mmu:238564%09red/mmu:19735%09red/mmu:14678%09red/mmu:18176%09red/mmu:108099%09red/mmu:11512%09red/mmu:20191%09red
Gastric acid secretion	KEGG PATHWAY	mmu04971	6	73	0.00210544	0.0106616	238564|20535|16535|14678|11512|224129	http://www.genome.jp/kegg-bin/show_pathway?mmu04971/mmu:20535%09red/mmu:14678%09red/mmu:224129%09red/mmu:238564%09red/mmu:11512%09red/mmu:16535%09red
Endocytosis	KEGG PATHWAY	mmu04144	13	294	0.00217373	0.0107781	347722|18720|67300|13660|19345|17999|330319|228998|16004|19158|12978|12540|14062	http://www.genome.jp/kegg-bin/show_pathway?mmu04144/mmu:19158%09red/mmu:16004%09red/mmu:19345%09red/mmu:347722%09red/mmu:12540%09red/mmu:14062%09red/mmu:13660%09red/mmu:330319%09red/mmu:18720%09red/mmu:17999%09red/mmu:67300%09red/mmu:228998%09red/mmu:12978%09red
Arrhythmogenic right ventricular cardiomyopathy (ARVC)	KEGG PATHWAY	mmu05412	6	74	0.00224458	0.0109023	20191|12293|12385|20541|109700|16420	http://www.genome.jp/kegg-bin/show_pathway?mmu05412/mmu:12293%09red/mmu:109700%09red/mmu:16420%09red/mmu:20541%09red/mmu:12385%09red/mmu:20191%09red
Jak-STAT signaling pathway	KEGG PATHWAY	mmu04630	9	161	0.00234955	0.0111838	16880|11651|56468|14199|20851|16452|15980|14600|16157	http://www.genome.jp/kegg-bin/show_pathway?mmu04630/mmu:15980%09red/mmu:14199%09red/mmu:14600%09red/mmu:11651%09red/mmu:56468%09red/mmu:16157%09red/mmu:16880%09red/mmu:20851%09red/mmu:16452%09red
Cardiac muscle contraction	KEGG PATHWAY	mmu04260	6	80	0.00322983	0.0150725	67003|20191|12293|66445|20541|17896	http://www.genome.jp/kegg-bin/show_pathway?mmu04260/mmu:12293%09red/mmu:67003%09red/mmu:20541%09red/mmu:66445%09red/mmu:20191%09red/mmu:17896%09red
Influenza A	KEGG PATHWAY	mmu05164	9	172	0.00356765	0.0163288	117198|27103|22035|232989|56637|26400|16452|15980|11651	http://www.genome.jp/kegg-bin/show_pathway?mmu05164/mmu:15980%09red/mmu:27103%09red/mmu:22035%09red/mmu:232989%09red/mmu:56637%09red/mmu:26400%09red/mmu:11651%09red/mmu:117198%09red/mmu:16452%09red
Regulation of lipolysis in adipocytes	KEGG PATHWAY	mmu04923	5	57	0.00378771	0.016517	67469|14678|224129|11651|11512	http://www.genome.jp/kegg-bin/show_pathway?mmu04923/mmu:67469%09red/mmu:11512%09red/mmu:224129%09red/mmu:14678%09red/mmu:11651%09red
Peroxisome	KEGG PATHWAY	mmu04146	6	83	0.00382867	0.016517	11666|216739|15926|19299|11430|269951	http://www.genome.jp/kegg-bin/show_pathway?mmu04146/mmu:269951%09red/mmu:19299%09red/mmu:11430%09red/mmu:216739%09red/mmu:11666%09red/mmu:15926%09red
RNA degradation	KEGG PATHWAY	mmu03018	6	83	0.00382867	0.016517	104625|18983|218343|24127|13806|57259	http://www.genome.jp/kegg-bin/show_pathway?mmu03018/mmu:57259%09red/mmu:104625%09red/mmu:218343%09red/mmu:433182%09red/mmu:18983%09red/mmu:24127%09red
Proteoglycans in cancer	KEGG PATHWAY	mmu05205	10	208	0.00388636	0.016517	11651|69632|319757|16653|11735|14083|12540|12843|20130|75705	http://www.genome.jp/kegg-bin/show_pathway?mmu05205/mmu:12843%09red/mmu:11735%09red/mmu:319757%09red/mmu:18176%09red/mmu:14083%09red/mmu:12540%09red/mmu:69632%09red/mmu:20130%09red/mmu:11651%09red/mmu:75705%09red
Hypertrophic cardiomyopathy (HCM)	KEGG PATHWAY	mmu05410	6	84	0.00404545	0.0168915	20191|12293|108099|20541|109700|16420	http://www.genome.jp/kegg-bin/show_pathway?mmu05410/mmu:12293%09red/mmu:109700%09red/mmu:16420%09red/mmu:108099%09red/mmu:20541%09red/mmu:20191%09red
Cholinergic synapse	KEGG PATHWAY	mmu04725	7	113	0.00412479	0.0169259	11651|14678|16535|16653|11512|224129|16452	http://www.genome.jp/kegg-bin/show_pathway?mmu04725/mmu:18176%09red/mmu:14678%09red/mmu:224129%09red/mmu:11512%09red/mmu:16452%09red/mmu:11651%09red/mmu:16535%09red
Gap junction	KEGG PATHWAY	mmu04540	6	86	0.00450606	0.018177	14678|16653|53857|11512|14816|224129	http://www.genome.jp/kegg-bin/show_pathway?mmu04540/mmu:224129%09red/mmu:14816%09red/mmu:14678%09red/mmu:18176%09red/mmu:53857%09red/mmu:11512%09red
ErbB signaling pathway	KEGG PATHWAY	mmu04012	6	87	0.00475032	0.0188429	16653|56637|26400|14083|20851|11651	http://www.genome.jp/kegg-bin/show_pathway?mmu04012/mmu:18176%09red/mmu:14083%09red/mmu:56637%09red/mmu:11651%09red/mmu:26400%09red/mmu:20851%09red
Alanine, aspartate and glutamate metabolism	KEGG PATHWAY	mmu00250	4	38	0.00522644	0.0203917	14718|108682|11564|14645	http://www.genome.jp/kegg-bin/show_pathway?mmu00250/mmu:14718%09red/mmu:14645%09red/mmu:108682%09red/mmu:11564%09red
HTLV-I infection	KEGG PATHWAY	mmu05166	12	295	0.00593142	0.0226	81601|70549|11651|18970|16653|56637|11512|224129|20851|22335|20130|59008	http://www.genome.jp/kegg-bin/show_pathway?mmu05166/mmu:81601%09red/mmu:22335%09red/mmu:59008%09red/mmu:224129%09red/mmu:18176%09red/mmu:20130%09red/mmu:56637%09red/mmu:11512%09red/mmu:18970%09red/mmu:11651%09red/mmu:70549%09red/mmu:20851%09red
Longevity regulating pathway - multiple species	KEGG PATHWAY	mmu04213	5	64	0.00598236	0.0226	224129|108099|16653|11651|11512	http://www.genome.jp/kegg-bin/show_pathway?mmu04213/mmu:108099%09red/mmu:11512%09red/mmu:18176%09red/mmu:224129%09red/mmu:11651%09red
Arginine biosynthesis	KEGG PATHWAY	mmu00220	3	20	0.00640913	0.023834	14718|108682|14645	http://www.genome.jp/kegg-bin/show_pathway?mmu00220/mmu:14718%09red/mmu:14645%09red/mmu:108682%09red
Glycolysis / Gluconeogenesis	KEGG PATHWAY	mmu00010	5	66	0.00674548	0.0243246	68263|18655|13806|235339|103988	http://www.genome.jp/kegg-bin/show_pathway?mmu00010/mmu:68263%09red/mmu:103988%09red/mmu:433182%09red/mmu:235339%09red/mmu:18655%09red
Central carbon metabolism in cancer	KEGG PATHWAY	mmu05230	5	66	0.00674548	0.0243246	68263|103988|228026|11651|16653	http://www.genome.jp/kegg-bin/show_pathway?mmu05230/mmu:68263%09red/mmu:103988%09red/mmu:18176%09red/mmu:228026%09red/mmu:11651%09red
Longevity regulating pathway	KEGG PATHWAY	mmu04211	6	96	0.00740647	0.0263096	16653|108099|224129|110147|11512|11651	http://www.genome.jp/kegg-bin/show_pathway?mmu04211/mmu:224129%09red/mmu:110147%09red/mmu:18176%09red/mmu:108099%09red/mmu:11512%09red/mmu:11651%09red
Renal cell carcinoma	KEGG PATHWAY	mmu05211	5	68	0.00757421	0.0265097	109905|112405|16653|11651|12540	http://www.genome.jp/kegg-bin/show_pathway?mmu05211/mmu:112405%09red/mmu:18176%09red/mmu:109905%09red/mmu:12540%09red/mmu:11651%09red
Glucagon signaling pathway	KEGG PATHWAY	mmu04922	6	102	0.00968666	0.0329367	11651|103988|108099|68263|102093|100705	http://www.genome.jp/kegg-bin/show_pathway?mmu04922/mmu:100705%09red/mmu:68263%09red/mmu:102093%09red/mmu:103988%09red/mmu:108099%09red/mmu:11651%09red
ABC transporters	KEGG PATHWAY	mmu02010	4	46	0.00968726	0.0329367	239273|11666|20927|19299	http://www.genome.jp/kegg-bin/show_pathway?mmu02010/mmu:20927%09red/mmu:11666%09red/mmu:19299%09red/mmu:239273%09red
Adipocytokine signaling pathway	KEGG PATHWAY	mmu04920	5	73	0.00995061	0.0333556	100705|16452|216739|11651|108099	http://www.genome.jp/kegg-bin/show_pathway?mmu04920/mmu:108099%09red/mmu:100705%09red/mmu:11651%09red/mmu:16452%09red/mmu:216739%09red
Tryptophan metabolism	KEGG PATHWAY	mmu00380	4	47	0.0103758	0.0342977	70266|270076|239017|18293	http://www.genome.jp/kegg-bin/show_pathway?mmu00380/mmu:70266%09red/mmu:270076%09red/mmu:18293%09red/mmu:239017%09red
Pyrimidine metabolism	KEGG PATHWAY	mmu00240	6	104	0.0105468	0.0343856	20020|80914|78929|23959|20019|66588	http://www.genome.jp/kegg-bin/show_pathway?mmu00240/mmu:23959%09red/mmu:20020%09red/mmu:78929%09red/mmu:20019%09red/mmu:66588%09red/mmu:80914%09red
Measles	KEGG PATHWAY	mmu05162	7	139	0.0116502	0.0374697	16452|27103|22035|56637|20851|11651|15980	http://www.genome.jp/kegg-bin/show_pathway?mmu05162/mmu:15980%09red/mmu:27103%09red/mmu:22035%09red/mmu:56637%09red/mmu:11651%09red/mmu:20851%09red/mmu:16452%09red
Fatty acid degradation	KEGG PATHWAY	mmu00071	4	49	0.0118459	0.0375909	270076|11430|12896|216739	http://www.genome.jp/kegg-bin/show_pathway?mmu00071/mmu:11430%09red/mmu:270076%09red/mmu:12896%09red/mmu:216739%09red
Bacterial invasion of epithelial cells	KEGG PATHWAY	mmu05100	5	78	0.0127939	0.0395449	12385|67300|14083|140580|12540	http://www.genome.jp/kegg-bin/show_pathway?mmu05100/mmu:12385%09red/mmu:140580%09red/mmu:67300%09red/mmu:14083%09red/mmu:12540%09red
Salivary secretion	KEGG PATHWAY	mmu04970	5	78	0.0127939	0.0395449	67972|20535|224129|13010|11512	http://www.genome.jp/kegg-bin/show_pathway?mmu04970/mmu:11512%09red/mmu:224129%09red/mmu:67972%09red/mmu:20535%09red/mmu:13010%09red
Alzheimer's disease	KEGG PATHWAY	mmu05010	8	177	0.012983	0.0396148	67003|17993|67273|66916|56637|66445|12334|68194	http://www.genome.jp/kegg-bin/show_pathway?mmu05010/mmu:67003%09red/mmu:12334%09red/mmu:68194%09red/mmu:56637%09red/mmu:66445%09red/mmu:67273%09red/mmu:66916%09red/mmu:17993%09red
Insulin resistance	KEGG PATHWAY	mmu04931	6	111	0.0139836	0.0414778	56637|210789|108099|20787|11651|100705	http://www.genome.jp/kegg-bin/show_pathway?mmu04931/mmu:100705%09red/mmu:56637%09red/mmu:108099%09red/mmu:11651%09red/mmu:20787%09red/mmu:210789%09red
MAPK signaling pathway	KEGG PATHWAY	mmu04010	10	254	0.0139937	0.0414778	11651|319520|17346|16653|26400|109905|12293|56274|12540|20130	http://www.genome.jp/kegg-bin/show_pathway?mmu04010/mmu:12293%09red/mmu:319520%09red/mmu:18176%09red/mmu:20130%09red/mmu:109905%09red/mmu:56274%09red/mmu:12540%09red/mmu:11651%09red/mmu:26400%09red/mmu:17346%09red
Ubiquitin mediated proteolysis	KEGG PATHWAY	mmu04120	7	145	0.0142805	0.0414778	73998|17999|28000|22214|69288|75717|59008	http://www.genome.jp/kegg-bin/show_pathway?mmu04120/mmu:59008%09red/mmu:28000%09red/mmu:73998%09red/mmu:22214%09red/mmu:17999%09red/mmu:75717%09red/mmu:69288%09red
Endometrial cancer	KEGG PATHWAY	mmu05213	4	52	0.0142907	0.0414778	12385|11651|16653|56637	http://www.genome.jp/kegg-bin/show_pathway?mmu05213/mmu:12385%09red/mmu:18176%09red/mmu:11651%09red/mmu:56637%09red
Endocrine and other factor-regulated calcium reabsorption	KEGG PATHWAY	mmu04961	4	54	0.0160852	0.046124	67972|67300|20541|11512	http://www.genome.jp/kegg-bin/show_pathway?mmu04961/mmu:20541%09red/mmu:11512%09red/mmu:67300%09red/mmu:67972%09red
RNA polymerase	KEGG PATHWAY	mmu03020	3	30	0.0174616	0.0489835	20019|78929|20020	http://www.genome.jp/kegg-bin/show_pathway?mmu03020/mmu:20019%09red/mmu:20020%09red/mmu:78929%09red
Thyroid hormone signaling pathway	KEGG PATHWAY	mmu04919	6	117	0.0174941	0.0489835	20185|17979|16653|56637|210789|11651	http://www.genome.jp/kegg-bin/show_pathway?mmu04919/mmu:18176%09red/mmu:56637%09red/mmu:11651%09red/mmu:17979%09red/mmu:210789%09red/mmu:20185%09red
Valine, leucine and isoleucine degradation	KEGG PATHWAY	mmu00280	4	56	0.0180151	0.0494426	12039|11992|12036|73724	http://www.genome.jp/kegg-bin/show_pathway?mmu00280/mmu:12039%09red/mmu:12036%09red/mmu:11992%09red/mmu:73724%09red
Cytokine-cytokine receptor interaction	KEGG PATHWAY	mmu04060	10	265	0.0180735	0.0494426	56744|16880|22035|20315|57266|66102|15980|12978|14600|16157	http://www.genome.jp/kegg-bin/show_pathway?mmu04060/mmu:56744%09red/mmu:57266%09red/mmu:15980%09red/mmu:22035%09red/mmu:14600%09red/mmu:66102%09red/mmu:20315%09red/mmu:16157%09red/mmu:16880%09red/mmu:12978%09red
Insulin secretion	KEGG PATHWAY	mmu04911	5	86	0.0184052	0.0497777	224129|103988|20927|20191|11512	http://www.genome.jp/kegg-bin/show_pathway?mmu04911/mmu:103988%09red/mmu:20927%09red/mmu:224129%09red/mmu:11512%09red/mmu:20191%09red
Glutathione metabolism	KEGG PATHWAY	mmu00480	4	57	0.0190316	0.0508935	15926|20603|14778|269951	http://www.genome.jp/kegg-bin/show_pathway?mmu00480/mmu:14778%09red/mmu:20603%09red/mmu:269951%09red/mmu:15926%09red
GnRH signaling pathway	KEGG PATHWAY	mmu04912	5	88	0.0200253	0.0525074	26400|12540|16653|224129|11512	http://www.genome.jp/kegg-bin/show_pathway?mmu04912/mmu:26400%09red/mmu:11512%09red/mmu:18176%09red/mmu:224129%09red/mmu:12540%09red
mTOR signaling pathway	KEGG PATHWAY	mmu04150	7	156	0.020159	0.0525074	16653|56637|56430|14245|11651|216742|75705	http://www.genome.jp/kegg-bin/show_pathway?mmu04150/mmu:216742%09red/mmu:14245%09red/mmu:18176%09red/mmu:56430%09red/mmu:56637%09red/mmu:11651%09red/mmu:75705%09red
Ras signaling pathway	KEGG PATHWAY	mmu04014	9	231	0.020297	0.0525074	21687|11651|19345|16653|109905|12978|12540|20130|18784	http://www.genome.jp/kegg-bin/show_pathway?mmu04014/mmu:19345%09red/mmu:18176%09red/mmu:20130%09red/mmu:18784%09red/mmu:12540%09red/mmu:11651%09red/mmu:21687%09red/mmu:109905%09red/mmu:12978%09red
Neurotrophin signaling pathway	KEGG PATHWAY	mmu04722	6	122	0.0208473	0.0533511	16653|56637|26400|109905|12540|11651	http://www.genome.jp/kegg-bin/show_pathway?mmu04722/mmu:18176%09red/mmu:12540%09red/mmu:56637%09red/mmu:11651%09red/mmu:26400%09red/mmu:109905%09red
Glycerolipid metabolism	KEGG PATHWAY	mmu00561	4	59	0.0211693	0.0535988	67512|14245|102247|52123	http://www.genome.jp/kegg-bin/show_pathway?mmu00561/mmu:52123%09red/mmu:67512%09red/mmu:102247%09red/mmu:14245%09red
Progesterone-mediated oocyte maturation	KEGG PATHWAY	mmu04914	5	90	0.0217359	0.0544541	59008|14678|224129|11651|11512	http://www.genome.jp/kegg-bin/show_pathway?mmu04914/mmu:11651%09red/mmu:11512%09red/mmu:224129%09red/mmu:14678%09red/mmu:59008%09red
VEGF signaling pathway	KEGG PATHWAY	mmu04370	4	60	0.022291	0.0547214	14083|16653|11651|12540	http://www.genome.jp/kegg-bin/show_pathway?mmu04370/mmu:11651%09red/mmu:18176%09red/mmu:14083%09red/mmu:12540%09red
Lysosome	KEGG PATHWAY	mmu04142	6	124	0.0223024	0.0547214	12492|67300|14466|74105|16004|13030	http://www.genome.jp/kegg-bin/show_pathway?mmu04142/mmu:13030%09red/mmu:12492%09red/mmu:16004%09red/mmu:67300%09red/mmu:14466%09red/mmu:74105%09red
Morphine addiction	KEGG PATHWAY	mmu05032	5	93	0.0244752	0.0594398	54611|18575|14678|224129|11512	http://www.genome.jp/kegg-bin/show_pathway?mmu05032/mmu:54611%09red/mmu:11512%09red/mmu:224129%09red/mmu:18575%09red/mmu:14678%09red
Vascular smooth muscle contraction	KEGG PATHWAY	mmu04270	6	128	0.0254145	0.0610974	238564|69632|13617|11512|224129|18784	http://www.genome.jp/kegg-bin/show_pathway?mmu04270/mmu:238564%09red/mmu:13617%09red/mmu:224129%09red/mmu:11512%09red/mmu:18784%09red/mmu:69632%09red
Phosphatidylinositol signaling system	KEGG PATHWAY	mmu04070	5	97	0.0284591	0.0675001	74596|18720|320404|271424|110911	http://www.genome.jp/kegg-bin/show_pathway?mmu04070/mmu:110911%09red/mmu:271424%09red/mmu:74596%09red/mmu:18720%09red/mmu:320404%09red
Fatty acid biosynthesis	KEGG PATHWAY	mmu00061	2	14	0.028645	0.0675001	216739|100705	http://www.genome.jp/kegg-bin/show_pathway?mmu00061/mmu:100705%09red/mmu:216739%09red
Circadian entrainment	KEGG PATHWAY	mmu04713	5	98	0.0295154	0.0688692	224129|14678|20191|18626|11512	http://www.genome.jp/kegg-bin/show_pathway?mmu04713/mmu:18626%09red/mmu:11512%09red/mmu:224129%09red/mmu:14678%09red/mmu:20191%09red
RNA transport	KEGG PATHWAY	mmu03013	7	170	0.0298398	0.0689501	26905|13627|269113|78655|20430|13681|75705	http://www.genome.jp/kegg-bin/show_pathway?mmu03013/mmu:13627%09red/mmu:13681%09red/mmu:26905%09red/mmu:269113%09red/mmu:20430%09red/mmu:78655%09red/mmu:75705%09red
Melanogenesis	KEGG PATHWAY	mmu04916	5	99	0.0305961	0.0700179	224129|14678|16653|56637|11512	http://www.genome.jp/kegg-bin/show_pathway?mmu04916/mmu:224129%09red/mmu:11512%09red/mmu:18176%09red/mmu:14678%09red/mmu:56637%09red
FoxO signaling pathway	KEGG PATHWAY	mmu04068	6	135	0.0315306	0.0714694	22035|16653|108099|14816|12053|11651	http://www.genome.jp/kegg-bin/show_pathway?mmu04068/mmu:14816%09red/mmu:18176%09red/mmu:22035%09red/mmu:12053%09red/mmu:108099%09red/mmu:11651%09red
Choline metabolism in cancer	KEGG PATHWAY	mmu05231	5	101	0.0328311	0.0737152	20520|11651|16653|18720|74182	http://www.genome.jp/kegg-bin/show_pathway?mmu05231/mmu:74182%09red/mmu:20520%09red/mmu:18176%09red/mmu:18720%09red/mmu:11651%09red
Apoptosis	KEGG PATHWAY	mmu04210	6	139	0.0354215	0.0780586	22035|16653|53857|12334|11651|13030	http://www.genome.jp/kegg-bin/show_pathway?mmu04210/mmu:13030%09red/mmu:12334%09red/mmu:18176%09red/mmu:22035%09red/mmu:53857%09red/mmu:11651%09red
Oxidative phosphorylation	KEGG PATHWAY	mmu00190	6	139	0.0354215	0.0780586	67003|17993|67273|66916|66445|68194	http://www.genome.jp/kegg-bin/show_pathway?mmu00190/mmu:67003%09red/mmu:68194%09red/mmu:66445%09red/mmu:67273%09red/mmu:66916%09red/mmu:17993%09red
Bile secretion	KEGG PATHWAY	mmu04976	4	71	0.0370196	0.0808317	239273|20535|224129|11512	http://www.genome.jp/kegg-bin/show_pathway?mmu04976/mmu:11512%09red/mmu:224129%09red/mmu:20535%09red/mmu:239273%09red
T cell receptor signaling pathway	KEGG PATHWAY	mmu04660	5	105	0.0375996	0.0813519	26400|11651|16653|56637|12540	http://www.genome.jp/kegg-bin/show_pathway?mmu04660/mmu:26400%09red/mmu:18176%09red/mmu:11651%09red/mmu:12540%09red/mmu:56637%09red
Selenocompound metabolism	KEGG PATHWAY	mmu00450	2	17	0.0395024	0.0846989	70266|238505	http://www.genome.jp/kegg-bin/show_pathway?mmu00450/mmu:238505%09red/mmu:70266%09red
Vasopressin-regulated water reabsorption	KEGG PATHWAY	mmu04962	3	43	0.0414794	0.0880594	19345|11512|67665	http://www.genome.jp/kegg-bin/show_pathway?mmu04962/mmu:19345%09red/mmu:11512%09red/mmu:67665%09red
Pertussis	KEGG PATHWAY	mmu05133	4	74	0.0418097	0.0880594	12260|12632|12258|14678	http://www.genome.jp/kegg-bin/show_pathway?mmu05133/mmu:12258%09red/mmu:12632%09red/mmu:14678%09red/mmu:12260%09red
Hedgehog signaling pathway	KEGG PATHWAY	mmu04340	3	44	0.0437756	0.0913913	214897|319757|56637	http://www.genome.jp/kegg-bin/show_pathway?mmu04340/mmu:319757%09red/mmu:214897%09red/mmu:56637%09red
Amoebiasis	KEGG PATHWAY	mmu05146	5	111	0.0455091	0.0941841	12830|19345|12843|14083|16779	http://www.genome.jp/kegg-bin/show_pathway?mmu05146/mmu:19345%09red/mmu:16779%09red/mmu:12830%09red/mmu:12843%09red/mmu:14083%09red
One carbon pool by folate	KEGG PATHWAY	mmu00670	2	19	0.0474666	0.0973884	108156|238505	http://www.genome.jp/kegg-bin/show_pathway?mmu00670/mmu:238505%09red/mmu:108156%09red
Mineral absorption	KEGG PATHWAY	mmu04978	3	46	0.0485539	0.0987677	67972|171429|20541	http://www.genome.jp/kegg-bin/show_pathway?mmu04978/mmu:20541%09red/mmu:171429%09red/mmu:67972%09red
Epstein-Barr virus infection	KEGG PATHWAY	mmu05169	8	232	0.0496621	0.100166	27103|20020|56637|19185|26400|78929|17999|11651	http://www.genome.jp/kegg-bin/show_pathway?mmu05169/mmu:78929%09red/mmu:27103%09red/mmu:56637%09red/mmu:20020%09red/mmu:11651%09red/mmu:17999%09red/mmu:26400%09red/mmu:19185%09red
