# Supplementary material for: Novel Transcriptomic Interactomes of Noncoding RNAs in the Heart under Altered Thyroid Hormonal States
Source: Int J Mol Sci. 2023 Mar 31;24(7):6560. doi: 10.3390/ijms24076560 (PMC10095585; doi:10.3390/ijms24076560)
Supplement: Supplementary file 1 [file ijms-24-06560-s001.zip › Supplemental File S20 miRNA mRNA Network Analysis.xlsx]

## Sheet: HypoTH vs Control
miRNA	HypoTH_readcount	Control_readcount	log2FoldChange	pval	padj	Transcript	gene_id	gene_name	feature	HypoTH.value	Control.value	log2foldchange	pvalue	qvalue
mmu-miR-466i-5p	352.593	42.1158	2.344	5.49e-05	0.00284	NM_197990.3	69399	1700025G04Rik	transcript	6.52172	2.62541	1.31271	0.000479421	0.0276354
mmu-miR-29b-2-5p	32.6134	115.312	-1.5205	0.0011706	0.026507	NM_197990.3	69399	1700025G04Rik	transcript	6.52172	2.62541	1.31271	0.000479421	0.0276354
mmu-miR-690	1195.04	385.602	1.4425	0.0010865	0.02646	NM_197990.3	69399	1700025G04Rik	transcript	6.52172	2.62541	1.31271	0.000479421	0.0276354
mmu-miR-214-3p	866.854	544.158	0.66229	0.00013468	0.0046466	NM_197990.3	69399	1700025G04Rik	transcript	6.52172	2.62541	1.31271	0.000479421	0.0276354
mmu-miR-208a-5p	1.68468	98.5205	-4.8306	5.8e-20	1.2e-17	NM_197990.3	69399	1700025G04Rik	transcript	6.52172	2.62541	1.31271	0.000479421	0.0276354
mmu-miR-193b-3p	657.266	247.533	1.3911	4.18e-26	1.73e-23	NM_197990.3	69399	1700025G04Rik	transcript	6.52172	2.62541	1.31271	0.000479421	0.0276354
mmu-miR-214-5p	271.213	165.169	0.69303	6.26e-05	0.0028804	NM_197990.3	69399	1700025G04Rik	transcript	6.52172	2.62541	1.31271	0.000479421	0.0276354
mmu-miR-200a-3p	143.74	23.9782	1.9969	0.00056829	0.015685	NM_197990.3	69399	1700025G04Rik	transcript	6.52172	2.62541	1.31271	0.000479421	0.0276354
mmu-miR-3470b	336.04	56.7948	2.1526	1.98e-05	0.0013662	NM_197990.3	69399	1700025G04Rik	transcript	6.52172	2.62541	1.31271	0.000479421	0.0276354
mmu-miR-146a-5p	1144.77	2572.83	-1.0815	0.0024408	0.042104	NM_197990.3	69399	1700025G04Rik	transcript	6.52172	2.62541	1.31271	0.000479421	0.0276354
mmu-miR-466i-5p	352.593	42.1158	2.344	5.49e-05	0.00284	XM_036161354.1	228602	4930402H24Rik	transcript	1.31164	0.00155	9.72489	8.14e-05	0.0253471
mmu-miR-365-1-5p	42.0397	9.35359	1.749	0.00085832	0.022209	XM_036161354.1	228602	4930402H24Rik	transcript	1.31164	0.00155	9.72489	8.14e-05	0.0253471
mmu-miR-214-3p	866.854	544.158	0.66229	0.00013468	0.0046466	XM_036161354.1	228602	4930402H24Rik	transcript	1.31164	0.00155	9.72489	8.14e-05	0.0253471
mmu-miR-208a-5p	1.68468	98.5205	-4.8306	5.8e-20	1.2e-17	XM_036161354.1	228602	4930402H24Rik	transcript	1.31164	0.00155	9.72489	8.14e-05	0.0253471
mmu-miR-193b-3p	657.266	247.533	1.3911	4.18e-26	1.73e-23	XM_036161354.1	228602	4930402H24Rik	transcript	1.31164	0.00155	9.72489	8.14e-05	0.0253471
mmu-miR-3470b	336.04	56.7948	2.1526	1.98e-05	0.0013662	XM_036161354.1	228602	4930402H24Rik	transcript	1.31164	0.00155	9.72489	8.14e-05	0.0253471
mmu-miR-365-2-5p	8.11913	1.17918	1.9254	0.0018939	0.035639	XM_036161354.1	228602	4930402H24Rik	transcript	1.31164	0.00155	9.72489	8.14e-05	0.0253471
mmu-miR-193b-3p	657.266	247.533	1.3911	4.18e-26	1.73e-23	XM_017319538.2	229227	4932438A13Rik	transcript	0.964012	1.14824	-0.252298	0.000221667	0.0276354
mmu-miR-214-5p	271.213	165.169	0.69303	6.26e-05	0.0028804	XM_017319538.2	229227	4932438A13Rik	transcript	0.964012	1.14824	-0.252298	0.000221667	0.0276354
mmu-miR-3470b	336.04	56.7948	2.1526	1.98e-05	0.0013662	XM_017319538.2	229227	4932438A13Rik	transcript	0.964012	1.14824	-0.252298	0.000221667	0.0276354
mmu-miR-874-3p	67.1603	160.155	-1.1385	0.0024216	0.042104	TCONS_00002486	68295	Aar2	transcript	1.18122	0	Inf	0.000820671	0.0276354
mmu-miR-466i-5p	352.593	42.1158	2.344	5.49e-05	0.00284	TCONS_00002486	68295	Aar2	transcript	1.18122	0	Inf	0.000820671	0.0276354
mmu-miR-29b-2-5p	32.6134	115.312	-1.5205	0.0011706	0.026507	TCONS_00002486	68295	Aar2	transcript	1.18122	0	Inf	0.000820671	0.0276354
mmu-miR-214-3p	866.854	544.158	0.66229	0.00013468	0.0046466	TCONS_00002486	68295	Aar2	transcript	1.18122	0	Inf	0.000820671	0.0276354
mmu-miR-193b-3p	657.266	247.533	1.3911	4.18e-26	1.73e-23	TCONS_00002486	68295	Aar2	transcript	1.18122	0	Inf	0.000820671	0.0276354
mmu-miR-1983	29.9641	89.2893	-1.379	0.00016096	0.0051261	TCONS_00002486	68295	Aar2	transcript	1.18122	0	Inf	0.000820671	0.0276354
mmu-miR-200b-3p	90.9629	28.7971	1.6296	1.15e-10	1.59e-08	TCONS_00015789	107476	Acaca	transcript	0.855672	0.031853	4.74756	0.0012857	0.0341943
mmu-miR-466i-5p	352.593	42.1158	2.344	5.49e-05	0.00284	TCONS_00015789	107476	Acaca	transcript	0.855672	0.031853	4.74756	0.0012857	0.0341943
mmu-miR-365-1-5p	42.0397	9.35359	1.749	0.00085832	0.022209	TCONS_00015789	107476	Acaca	transcript	0.855672	0.031853	4.74756	0.0012857	0.0341943
mmu-miR-29b-2-5p	32.6134	115.312	-1.5205	0.0011706	0.026507	TCONS_00015789	107476	Acaca	transcript	0.855672	0.031853	4.74756	0.0012857	0.0341943
mmu-miR-214-3p	866.854	544.158	0.66229	0.00013468	0.0046466	TCONS_00015789	107476	Acaca	transcript	0.855672	0.031853	4.74756	0.0012857	0.0341943
mmu-miR-214-5p	271.213	165.169	0.69303	6.26e-05	0.0028804	TCONS_00015789	107476	Acaca	transcript	0.855672	0.031853	4.74756	0.0012857	0.0341943
mmu-miR-365-2-5p	8.11913	1.17918	1.9254	0.0018939	0.035639	TCONS_00015789	107476	Acaca	transcript	0.855672	0.031853	4.74756	0.0012857	0.0341943
mmu-miR-200a-3p	143.74	23.9782	1.9969	0.00056829	0.015685	NM_007383.3	11409	Acads	transcript	52.8129	51.0349	0.0494069	0.00160473	0.037419
mmu-miR-200b-3p	90.9629	28.7971	1.6296	1.15e-10	1.59e-08	XM_036163601.1	11428	Aco1	transcript	2.09101	0.00680967	8.2624	0.000856381	0.0281337
mmu-miR-200a-3p	143.74	23.9782	1.9969	0.00056829	0.015685	XM_036163601.1	11428	Aco1	transcript	2.09101	0.00680967	8.2624	0.000856381	0.0281337
mmu-miR-200b-3p	90.9629	28.7971	1.6296	1.15e-10	1.59e-08	TCONS_00017162	11430	Acox1	transcript	12.213	0.001165	13.3558	0.000790298	0.0276354
mmu-miR-214-3p	866.854	544.158	0.66229	0.00013468	0.0046466	TCONS_00017162	11430	Acox1	transcript	12.213	0.001165	13.3558	0.000790298	0.0276354
mmu-miR-200a-3p	143.74	23.9782	1.9969	0.00056829	0.015685	TCONS_00017162	11430	Acox1	transcript	12.213	0.001165	13.3558	0.000790298	0.0276354
mmu-miR-3470b	336.04	56.7948	2.1526	1.98e-05	0.0013662	TCONS_00017162	11430	Acox1	transcript	12.213	0.001165	13.3558	0.000790298	0.0276354
mmu-miR-874-3p	67.1603	160.155	-1.1385	0.0024216	0.042104	NM_146243.2	66713	Actr2	transcript	29.0525	22.8911	0.343875	0.00149481	0.0362404
mmu-miR-365-1-5p	42.0397	9.35359	1.749	0.00085832	0.022209	NM_146243.2	66713	Actr2	transcript	29.0525	22.8911	0.343875	0.00149481	0.0362404
mmu-miR-214-3p	866.854	544.158	0.66229	0.00013468	0.0046466	NM_146243.2	66713	Actr2	transcript	29.0525	22.8911	0.343875	0.00149481	0.0362404
mmu-miR-6538	304.502	74.5948	1.8593	7.2e-07	7.45e-05	NM_146243.2	66713	Actr2	transcript	29.0525	22.8911	0.343875	0.00149481	0.0362404
mmu-miR-200a-3p	143.74	23.9782	1.9969	0.00056829	0.015685	NM_146243.2	66713	Actr2	transcript	29.0525	22.8911	0.343875	0.00149481	0.0362404
mmu-miR-365-2-5p	8.11913	1.17918	1.9254	0.0018939	0.035639	NM_146243.2	66713	Actr2	transcript	29.0525	22.8911	0.343875	0.00149481	0.0362404
mmu-miR-200b-3p	90.9629	28.7971	1.6296	1.15e-10	1.59e-08	NM_023735.2	74117	Actr3	transcript	21.3435	20.9671	0.0256739	0.0017022	0.0382862
mmu-miR-200a-3p	143.74	23.9782	1.9969	0.00056829	0.015685	NM_023735.2	74117	Actr3	transcript	21.3435	20.9671	0.0256739	0.0017022	0.0382862
mmu-miR-690	1195.04	385.602	1.4425	0.0010865	0.02646	NM_007395.4	11479	Acvr1b	transcript	6.46432	3.77857	0.774661	0.000388991	0.0276354
mmu-miR-214-3p	866.854	544.158	0.66229	0.00013468	0.0046466	NM_007395.4	11479	Acvr1b	transcript	6.46432	3.77857	0.774661	0.000388991	0.0276354
mmu-miR-874-3p	67.1603	160.155	-1.1385	0.0024216	0.042104	NM_001098225.2	11496	Adam22	transcript	2.58778	0.00525567	8.94362	2.29e-06	0.0151166
mmu-miR-29b-2-5p	32.6134	115.312	-1.5205	0.0011706	0.026507	NM_001098225.2	11496	Adam22	transcript	2.58778	0.00525567	8.94362	2.29e-06	0.0151166
mmu-miR-214-5p	271.213	165.169	0.69303	6.26e-05	0.0028804	NM_001098225.2	11496	Adam22	transcript	2.58778	0.00525567	8.94362	2.29e-06	0.0151166
mmu-miR-1983	29.9641	89.2893	-1.379	0.00016096	0.0051261	NM_001098225.2	11496	Adam22	transcript	2.58778	0.00525567	8.94362	2.29e-06	0.0151166
mmu-miR-221-3p	2269.82	1235.67	0.8571	8.52e-05	0.0035266	NM_001098225.2	11496	Adam22	transcript	2.58778	0.00525567	8.94362	2.29e-06	0.0151166
mmu-miR-200a-3p	143.74	23.9782	1.9969	0.00056829	0.015685	NM_001098225.2	11496	Adam22	transcript	2.58778	0.00525567	8.94362	2.29e-06	0.0151166
mmu-miR-3470b	336.04	56.7948	2.1526	1.98e-05	0.0013662	NM_001098225.2	11496	Adam22	transcript	2.58778	0.00525567	8.94362	2.29e-06	0.0151166
mmu-miR-146a-5p	1144.77	2572.83	-1.0815	0.0024408	0.042104	NM_001098225.2	11496	Adam22	transcript	2.58778	0.00525567	8.94362	2.29e-06	0.0151166
mmu-miR-467a-5p	101.062	157.027	-0.63987	0.0013446	0.026507	NM_001098225.2	11496	Adam22	transcript	2.58778	0.00525567	8.94362	2.29e-06	0.0151166
mmu-miR-365-1-5p	42.0397	9.35359	1.749	0.00085832	0.022209	NM_001012765.5	224129	Adcy5	transcript	21.2562	9.04944	1.23198	0.0014541	0.0359344
mmu-miR-365-2-5p	8.11913	1.17918	1.9254	0.0018939	0.035639	NM_001012765.5	224129	Adcy5	transcript	21.2562	9.04944	1.23198	0.0014541	0.0359344
mmu-miR-1195	19.6113	1.98363	2.212	0.0004848	0.014336	NM_001012765.5	224129	Adcy5	transcript	21.2562	9.04944	1.23198	0.0014541	0.0359344
mmu-miR-874-3p	67.1603	160.155	-1.1385	0.0024216	0.042104	XM_006503677.4	11518	Add1	transcript	1.28784	0.00563833	7.83547	0.000849239	0.028103
mmu-miR-365-1-5p	42.0397	9.35359	1.749	0.00085832	0.022209	XM_006503677.4	11518	Add1	transcript	1.28784	0.00563833	7.83547	0.000849239	0.028103
mmu-miR-214-3p	866.854	544.158	0.66229	0.00013468	0.0046466	XM_006503677.4	11518	Add1	transcript	1.28784	0.00563833	7.83547	0.000849239	0.028103
mmu-miR-365-2-5p	8.11913	1.17918	1.9254	0.0018939	0.035639	XM_006503677.4	11518	Add1	transcript	1.28784	0.00563833	7.83547	0.000849239	0.028103
mmu-miR-208a-5p	1.68468	98.5205	-4.8306	5.8e-20	1.2e-17	XM_036161610.1	27360	Add3	transcript	3.11512	0	Inf	2.35e-05	0.0155632
mmu-miR-221-3p	2269.82	1235.67	0.8571	8.52e-05	0.0035266	XM_036161610.1	27360	Add3	transcript	3.11512	0	Inf	2.35e-05	0.0155632
mmu-miR-200b-3p	90.9629	28.7971	1.6296	1.15e-10	1.59e-08	NM_175236.5	76187	Adhfe1	transcript	5.22125	5.88058	-0.171562	0.00131045	0.0342571
mmu-miR-874-3p	67.1603	160.155	-1.1385	0.0024216	0.042104	NM_175236.5	76187	Adhfe1	transcript	5.22125	5.88058	-0.171562	0.00131045	0.0342571
mmu-miR-466i-5p	352.593	42.1158	2.344	5.49e-05	0.00284	NM_175236.5	76187	Adhfe1	transcript	5.22125	5.88058	-0.171562	0.00131045	0.0342571
mmu-miR-214-3p	866.854	544.158	0.66229	0.00013468	0.0046466	NM_175236.5	76187	Adhfe1	transcript	5.22125	5.88058	-0.171562	0.00131045	0.0342571
mmu-miR-208a-5p	1.68468	98.5205	-4.8306	5.8e-20	1.2e-17	NM_175236.5	76187	Adhfe1	transcript	5.22125	5.88058	-0.171562	0.00131045	0.0342571
mmu-miR-1983	29.9641	89.2893	-1.379	0.00016096	0.0051261	NM_175236.5	76187	Adhfe1	transcript	5.22125	5.88058	-0.171562	0.00131045	0.0342571
mmu-miR-200a-3p	143.74	23.9782	1.9969	0.00056829	0.015685	NM_175236.5	76187	Adhfe1	transcript	5.22125	5.88058	-0.171562	0.00131045	0.0342571
mmu-miR-208a-3p	19.6731	144.716	-2.1853	0.00010883	0.0040958	NM_175236.5	76187	Adhfe1	transcript	5.22125	5.88058	-0.171562	0.00131045	0.0342571
mmu-miR-200b-3p	90.9629	28.7971	1.6296	1.15e-10	1.59e-08	NM_009634.6	11564	Adsl	transcript	8.39214	7.60029	0.142984	0.000689457	0.0276354
mmu-miR-874-3p	67.1603	160.155	-1.1385	0.0024216	0.042104	NM_009634.6	11564	Adsl	transcript	8.39214	7.60029	0.142984	0.000689457	0.0276354
mmu-miR-466i-5p	352.593	42.1158	2.344	5.49e-05	0.00284	NM_009634.6	11564	Adsl	transcript	8.39214	7.60029	0.142984	0.000689457	0.0276354
mmu-miR-690	1195.04	385.602	1.4425	0.0010865	0.02646	NM_009634.6	11564	Adsl	transcript	8.39214	7.60029	0.142984	0.000689457	0.0276354
mmu-miR-214-3p	866.854	544.158	0.66229	0.00013468	0.0046466	NM_009634.6	11564	Adsl	transcript	8.39214	7.60029	0.142984	0.000689457	0.0276354
mmu-miR-221-3p	2269.82	1235.67	0.8571	8.52e-05	0.0035266	NM_009634.6	11564	Adsl	transcript	8.39214	7.60029	0.142984	0.000689457	0.0276354
mmu-miR-200a-3p	143.74	23.9782	1.9969	0.00056829	0.015685	NM_009634.6	11564	Adsl	transcript	8.39214	7.60029	0.142984	0.000689457	0.0276354
mmu-miR-146a-5p	1144.77	2572.83	-1.0815	0.0024408	0.042104	NM_009634.6	11564	Adsl	transcript	8.39214	7.60029	0.142984	0.000689457	0.0276354
mmu-miR-29b-2-5p	32.6134	115.312	-1.5205	0.0011706	0.026507	NM_001163379.1	55979	Agpat1	transcript	14.6579	11.2463	0.382229	0.000825619	0.0277196
mmu-miR-214-3p	866.854	544.158	0.66229	0.00013468	0.0046466	NM_001163379.1	55979	Agpat1	transcript	14.6579	11.2463	0.382229	0.000825619	0.0277196
mmu-miR-29b-2-5p	32.6134	115.312	-1.5205	0.0011706	0.026507	TCONS_00002822	67512	Agpat2	transcript	1.95082	0	Inf	0.000820671	0.0276354
mmu-miR-214-3p	866.854	544.158	0.66229	0.00013468	0.0046466	TCONS_00002822	67512	Agpat2	transcript	1.95082	0	Inf	0.000820671	0.0276354
mmu-miR-874-3p	67.1603	160.155	-1.1385	0.0024216	0.042104	NM_177322.3	11607	Agtr1a	transcript	16.509	9.02107	0.871884	1.52e-05	0.0155632
mmu-miR-29b-2-5p	32.6134	115.312	-1.5205	0.0011706	0.026507	NM_177322.3	11607	Agtr1a	transcript	16.509	9.02107	0.871884	1.52e-05	0.0155632
mmu-miR-221-3p	2269.82	1235.67	0.8571	8.52e-05	0.0035266	NM_177322.3	11607	Agtr1a	transcript	16.509	9.02107	0.871884	1.52e-05	0.0155632
mmu-miR-200b-3p	90.9629	28.7971	1.6296	1.15e-10	1.59e-08	NM_009647.5	11639	Ak4	transcript	3.29582	0.0275303	6.90347	0.00015385	0.0276354
mmu-miR-874-3p	67.1603	160.155	-1.1385	0.0024216	0.042104	NM_009647.5	11639	Ak4	transcript	3.29582	0.0275303	6.90347	0.00015385	0.0276354
mmu-miR-29b-2-5p	32.6134	115.312	-1.5205	0.0011706	0.026507	NM_009647.5	11639	Ak4	transcript	3.29582	0.0275303	6.90347	0.00015385	0.0276354
mmu-miR-1983	29.9641	89.2893	-1.379	0.00016096	0.0051261	NM_009647.5	11639	Ak4	transcript	3.29582	0.0275303	6.90347	0.00015385	0.0276354
mmu-miR-200a-3p	143.74	23.9782	1.9969	0.00056829	0.015685	NM_009647.5	11639	Ak4	transcript	3.29582	0.0275303	6.90347	0.00015385	0.0276354
mmu-miR-3470b	336.04	56.7948	2.1526	1.98e-05	0.0013662	NM_009647.5	11639	Ak4	transcript	3.29582	0.0275303	6.90347	0.00015385	0.0276354
mmu-miR-466i-5p	352.593	42.1158	2.344	5.49e-05	0.00284	NM_019774.5	56399	Akap8	transcript	4.41498	4.61893	-0.0651514	0.0020109	0.0420282
mmu-miR-365-1-5p	42.0397	9.35359	1.749	0.00085832	0.022209	NM_019774.5	56399	Akap8	transcript	4.41498	4.61893	-0.0651514	0.0020109	0.0420282
mmu-miR-29b-2-5p	32.6134	115.312	-1.5205	0.0011706	0.026507	NM_019774.5	56399	Akap8	transcript	4.41498	4.61893	-0.0651514	0.0020109	0.0420282
mmu-miR-214-3p	866.854	544.158	0.66229	0.00013468	0.0046466	NM_019774.5	56399	Akap8	transcript	4.41498	4.61893	-0.0651514	0.0020109	0.0420282
mmu-miR-208a-5p	1.68468	98.5205	-4.8306	5.8e-20	1.2e-17	NM_019774.5	56399	Akap8	transcript	4.41498	4.61893	-0.0651514	0.0020109	0.0420282
mmu-miR-365-2-5p	8.11913	1.17918	1.9254	0.0018939	0.035639	NM_019774.5	56399	Akap8	transcript	4.41498	4.61893	-0.0651514	0.0020109	0.0420282
mmu-miR-200b-3p	90.9629	28.7971	1.6296	1.15e-10	1.59e-08	NM_011785.4	23797	Akt3	transcript	1.5986	0.0690953	4.53208	0.0015947	0.037419
mmu-miR-29b-2-5p	32.6134	115.312	-1.5205	0.0011706	0.026507	NM_011785.4	23797	Akt3	transcript	1.5986	0.0690953	4.53208	0.0015947	0.037419
mmu-miR-214-3p	866.854	544.158	0.66229	0.00013468	0.0046466	NM_011785.4	23797	Akt3	transcript	1.5986	0.0690953	4.53208	0.0015947	0.037419
mmu-miR-208a-5p	1.68468	98.5205	-4.8306	5.8e-20	1.2e-17	NM_011785.4	23797	Akt3	transcript	1.5986	0.0690953	4.53208	0.0015947	0.037419
mmu-miR-200b-3p	90.9629	28.7971	1.6296	1.15e-10	1.59e-08	NM_019764.2	56332	Amotl2	transcript	14.284	9.48432	0.590781	0.000290535	0.0276354
mmu-miR-214-3p	866.854	544.158	0.66229	0.00013468	0.0046466	NM_019764.2	56332	Amotl2	transcript	14.284	9.48432	0.590781	0.000290535	0.0276354
mmu-miR-146a-5p	1144.77	2572.83	-1.0815	0.0024408	0.042104	NM_019764.2	56332	Amotl2	transcript	14.284	9.48432	0.590781	0.000290535	0.0276354
mmu-miR-466i-5p	352.593	42.1158	2.344	5.49e-05	0.00284	NM_181394.3	69010	Anapc13	transcript	45.8899	56.7742	-0.307059	0.00233434	0.0458741
mmu-miR-1983	29.9641	89.2893	-1.379	0.00016096	0.0051261	NM_181394.3	69010	Anapc13	transcript	45.8899	56.7742	-0.307059	0.00233434	0.0458741
mmu-miR-214-3p	866.854	544.158	0.66229	0.00013468	0.0046466	TCONS_00007852	59008	Anapc5	transcript	3.69736	0	Inf	0.000820671	0.0276354
mmu-miR-365-1-5p	42.0397	9.35359	1.749	0.00085832	0.022209	NM_011923.4	26360	Angptl2	transcript	7.796	15.7984	-1.01897	0.000999197	0.0301224
mmu-miR-221-3p	2269.82	1235.67	0.8571	8.52e-05	0.0035266	NM_011923.4	26360	Angptl2	transcript	7.796	15.7984	-1.01897	0.000999197	0.0301224
mmu-miR-200a-3p	143.74	23.9782	1.9969	0.00056829	0.015685	NM_011923.4	26360	Angptl2	transcript	7.796	15.7984	-1.01897	0.000999197	0.0301224
mmu-miR-146a-5p	1144.77	2572.83	-1.0815	0.0024408	0.042104	NM_011923.4	26360	Angptl2	transcript	7.796	15.7984	-1.01897	0.000999197	0.0301224
mmu-miR-365-2-5p	8.11913	1.17918	1.9254	0.0018939	0.035639	NM_011923.4	26360	Angptl2	transcript	7.796	15.7984	-1.01897	0.000999197	0.0301224
mmu-miR-214-3p	866.854	544.158	0.66229	0.00013468	0.0046466	NM_020332.4	11732	Ank	transcript	34.408	47.7049	-0.471394	9.3e-06	0.0155632
mmu-miR-214-5p	271.213	165.169	0.69303	6.26e-05	0.0028804	NM_020332.4	11732	Ank	transcript	34.408	47.7049	-0.471394	9.3e-06	0.0155632
mmu-miR-466i-5p	352.593	42.1158	2.344	5.49e-05	0.00284	NM_001253814.1	71782	Ankle2	transcript	7.72172	4.99246	0.629172	0.00187625	0.0405382
mmu-miR-29b-2-5p	32.6134	115.312	-1.5205	0.0011706	0.026507	NM_001253814.1	71782	Ankle2	transcript	7.72172	4.99246	0.629172	0.00187625	0.0405382
mmu-miR-200a-3p	143.74	23.9782	1.9969	0.00056829	0.015685	NM_001253814.1	71782	Ankle2	transcript	7.72172	4.99246	0.629172	0.00187625	0.0405382
mmu-miR-146a-5p	1144.77	2572.83	-1.0815	0.0024408	0.042104	NM_001253814.1	71782	Ankle2	transcript	7.72172	4.99246	0.629172	0.00187625	0.0405382
mmu-miR-200b-3p	90.9629	28.7971	1.6296	1.15e-10	1.59e-08	NM_133979.3	102566	Ano10	transcript	3.18188	2.92827	0.119833	0.00259871	0.0486069
mmu-miR-466i-5p	352.593	42.1158	2.344	5.49e-05	0.00284	NM_133979.3	102566	Ano10	transcript	3.18188	2.92827	0.119833	0.00259871	0.0486069
mmu-miR-193b-3p	657.266	247.533	1.3911	4.18e-26	1.73e-23	NM_133979.3	102566	Ano10	transcript	3.18188	2.92827	0.119833	0.00259871	0.0486069
mmu-miR-690	1195.04	385.602	1.4425	0.0010865	0.02646	NM_001253757.1	66471	Anp32e	transcript	1.72974	1.29992	0.412137	0.00160311	0.037419
mmu-miR-214-3p	866.854	544.158	0.66229	0.00013468	0.0046466	NM_001253757.1	66471	Anp32e	transcript	1.72974	1.29992	0.412137	0.00160311	0.037419
mmu-miR-208a-5p	1.68468	98.5205	-4.8306	5.8e-20	1.2e-17	NM_001253757.1	66471	Anp32e	transcript	1.72974	1.29992	0.412137	0.00160311	0.037419
mmu-miR-214-5p	271.213	165.169	0.69303	6.26e-05	0.0028804	NM_001253757.1	66471	Anp32e	transcript	1.72974	1.29992	0.412137	0.00160311	0.037419
mmu-miR-200a-3p	143.74	23.9782	1.9969	0.00056829	0.015685	NM_001253757.1	66471	Anp32e	transcript	1.72974	1.29992	0.412137	0.00160311	0.037419
mmu-miR-100-5p	11740	27586.4	-1.185	7.37e-06	0.00060997	NM_001253757.1	66471	Anp32e	transcript	1.72974	1.29992	0.412137	0.00160311	0.037419
mmu-miR-467a-5p	101.062	157.027	-0.63987	0.0013446	0.026507	NM_001253757.1	66471	Anp32e	transcript	1.72974	1.29992	0.412137	0.00160311	0.037419
mmu-miR-200b-3p	90.9629	28.7971	1.6296	1.15e-10	1.59e-08	NM_026673.4	68316	Apoo	transcript	34.3868	43.4881	-0.338765	0.000776915	0.0276354
mmu-miR-214-3p	866.854	544.158	0.66229	0.00013468	0.0046466	XM_030250848.1	228998	Arfgap1	transcript	1.08784	0	Inf	0.000820671	0.0276354
mmu-miR-6538	304.502	74.5948	1.8593	7.2e-07	7.45e-05	XM_036156856.1	544817	Arhgap27	transcript	1.59212	0.000977333	10.6698	4.35e-05	0.0172905
mmu-miR-208a-5p	1.68468	98.5205	-4.8306	5.8e-20	1.2e-17	NM_019824.4	56378	Arpc3	transcript	23.7801	20.9362	0.183757	0.00112098	0.0317961
mmu-miR-874-3p	67.1603	160.155	-1.1385	0.0024216	0.042104	NM_009710.4	11870	Art1	transcript	35.968	53.38	-0.569584	0.000340564	0.0276354
mmu-miR-466i-5p	352.593	42.1158	2.344	5.49e-05	0.00284	NM_009710.4	11870	Art1	transcript	35.968	53.38	-0.569584	0.000340564	0.0276354
mmu-miR-214-5p	271.213	165.169	0.69303	6.26e-05	0.0028804	NM_009710.4	11870	Art1	transcript	35.968	53.38	-0.569584	0.000340564	0.0276354
novel_1	13879.1	1929.61	2.0063	0.0013125	0.026507	NM_009710.4	11870	Art1	transcript	35.968	53.38	-0.569584	0.000340564	0.0276354
mmu-miR-3470b	336.04	56.7948	2.1526	1.98e-05	0.0013662	NM_009710.4	11870	Art1	transcript	35.968	53.38	-0.569584	0.000340564	0.0276354
mmu-miR-200b-3p	90.9629	28.7971	1.6296	1.15e-10	1.59e-08	NM_013799.3	11907	Ate1	transcript	1.05172	0.261099	2.01008	0.0019568	0.0413468
mmu-miR-214-3p	866.854	544.158	0.66229	0.00013468	0.0046466	NM_013799.3	11907	Ate1	transcript	1.05172	0.261099	2.01008	0.0019568	0.0413468
mmu-miR-200a-3p	143.74	23.9782	1.9969	0.00056829	0.015685	NM_013799.3	11907	Ate1	transcript	1.05172	0.261099	2.01008	0.0019568	0.0413468
mmu-miR-146a-5p	1144.77	2572.83	-1.0815	0.0024408	0.042104	NM_013799.3	11907	Ate1	transcript	1.05172	0.261099	2.01008	0.0019568	0.0413468
mmu-miR-874-3p	67.1603	160.155	-1.1385	0.0024216	0.042104	NM_001288613.1	245860	Atg9a	transcript	2.10893	0.14069	3.90593	0.000401703	0.0276354
mmu-miR-466i-5p	352.593	42.1158	2.344	5.49e-05	0.00284	NM_001288613.1	245860	Atg9a	transcript	2.10893	0.14069	3.90593	0.000401703	0.0276354
mmu-miR-214-3p	866.854	544.158	0.66229	0.00013468	0.0046466	NM_001288613.1	245860	Atg9a	transcript	2.10893	0.14069	3.90593	0.000401703	0.0276354
mmu-miR-214-5p	271.213	165.169	0.69303	6.26e-05	0.0028804	NM_001288613.1	245860	Atg9a	transcript	2.10893	0.14069	3.90593	0.000401703	0.0276354
mmu-miR-6538	304.502	74.5948	1.8593	7.2e-07	7.45e-05	NM_001288613.1	245860	Atg9a	transcript	2.10893	0.14069	3.90593	0.000401703	0.0276354
mmu-miR-200a-3p	143.74	23.9782	1.9969	0.00056829	0.015685	NM_001288613.1	245860	Atg9a	transcript	2.10893	0.14069	3.90593	0.000401703	0.0276354
mmu-miR-3470b	336.04	56.7948	2.1526	1.98e-05	0.0013662	NM_001288613.1	245860	Atg9a	transcript	2.10893	0.14069	3.90593	0.000401703	0.0276354
mmu-miR-200b-3p	90.9629	28.7971	1.6296	1.15e-10	1.59e-08	XM_036163391.1	76295	Atp11b	transcript	1.4673	0.0165453	6.47059	0.000430899	0.0276354
mmu-miR-193b-3p	657.266	247.533	1.3911	4.18e-26	1.73e-23	XM_036163391.1	76295	Atp11b	transcript	1.4673	0.0165453	6.47059	0.000430899	0.0276354
mmu-miR-5126	30.4974	5.65546	2.0107	5.18e-05	0.00284	XM_030255147.2	381290	Atp2b4	transcript	1.79149	0	Inf	0.000233871	0.0276354
mmu-miR-874-3p	67.1603	160.155	-1.1385	0.0024216	0.042104	XM_030255147.2	381290	Atp2b4	transcript	1.79149	0	Inf	0.000233871	0.0276354
mmu-miR-466i-5p	352.593	42.1158	2.344	5.49e-05	0.00284	XM_030255147.2	381290	Atp2b4	transcript	1.79149	0	Inf	0.000233871	0.0276354
mmu-miR-365-1-5p	42.0397	9.35359	1.749	0.00085832	0.022209	XM_030255147.2	381290	Atp2b4	transcript	1.79149	0	Inf	0.000233871	0.0276354
mmu-miR-29b-2-5p	32.6134	115.312	-1.5205	0.0011706	0.026507	XM_030255147.2	381290	Atp2b4	transcript	1.79149	0	Inf	0.000233871	0.0276354
mmu-miR-214-3p	866.854	544.158	0.66229	0.00013468	0.0046466	XM_030255147.2	381290	Atp2b4	transcript	1.79149	0	Inf	0.000233871	0.0276354
mmu-miR-467b-5p	101.062	157.027	-0.63987	0.0013446	0.026507	XM_030255147.2	381290	Atp2b4	transcript	1.79149	0	Inf	0.000233871	0.0276354
mmu-miR-208a-5p	1.68468	98.5205	-4.8306	5.8e-20	1.2e-17	XM_030255147.2	381290	Atp2b4	transcript	1.79149	0	Inf	0.000233871	0.0276354
mmu-miR-1983	29.9641	89.2893	-1.379	0.00016096	0.0051261	XM_030255147.2	381290	Atp2b4	transcript	1.79149	0	Inf	0.000233871	0.0276354
mmu-miR-200a-3p	143.74	23.9782	1.9969	0.00056829	0.015685	XM_030255147.2	381290	Atp2b4	transcript	1.79149	0	Inf	0.000233871	0.0276354
mmu-miR-3470b	336.04	56.7948	2.1526	1.98e-05	0.0013662	XM_030255147.2	381290	Atp2b4	transcript	1.79149	0	Inf	0.000233871	0.0276354
mmu-miR-365-2-5p	8.11913	1.17918	1.9254	0.0018939	0.035639	XM_030255147.2	381290	Atp2b4	transcript	1.79149	0	Inf	0.000233871	0.0276354
mmu-miR-467a-5p	101.062	157.027	-0.63987	0.0013446	0.026507	XM_030255147.2	381290	Atp2b4	transcript	1.79149	0	Inf	0.000233871	0.0276354
mmu-miR-200a-3p	143.74	23.9782	1.9969	0.00056829	0.015685	NM_026468.2	67942	Atp5g2	transcript	100.501	117.219	-0.221997	0.000137356	0.0276354
mmu-miR-874-3p	67.1603	160.155	-1.1385	0.0024216	0.042104	NM_016709.2	11992	Auh	transcript	23.1108	25.9264	-0.165855	0.00124159	0.0335637
mmu-miR-466i-5p	352.593	42.1158	2.344	5.49e-05	0.00284	NM_016709.2	11992	Auh	transcript	23.1108	25.9264	-0.165855	0.00124159	0.0335637
mmu-miR-365-1-5p	42.0397	9.35359	1.749	0.00085832	0.022209	NM_016709.2	11992	Auh	transcript	23.1108	25.9264	-0.165855	0.00124159	0.0335637
mmu-miR-29b-2-5p	32.6134	115.312	-1.5205	0.0011706	0.026507	NM_016709.2	11992	Auh	transcript	23.1108	25.9264	-0.165855	0.00124159	0.0335637
mmu-miR-690	1195.04	385.602	1.4425	0.0010865	0.02646	NM_016709.2	11992	Auh	transcript	23.1108	25.9264	-0.165855	0.00124159	0.0335637
mmu-miR-214-3p	866.854	544.158	0.66229	0.00013468	0.0046466	NM_016709.2	11992	Auh	transcript	23.1108	25.9264	-0.165855	0.00124159	0.0335637
mmu-miR-467b-5p	101.062	157.027	-0.63987	0.0013446	0.026507	NM_016709.2	11992	Auh	transcript	23.1108	25.9264	-0.165855	0.00124159	0.0335637
mmu-miR-6538	304.502	74.5948	1.8593	7.2e-07	7.45e-05	NM_016709.2	11992	Auh	transcript	23.1108	25.9264	-0.165855	0.00124159	0.0335637
novel_1	13879.1	1929.61	2.0063	0.0013125	0.026507	NM_016709.2	11992	Auh	transcript	23.1108	25.9264	-0.165855	0.00124159	0.0335637
mmu-miR-3470b	336.04	56.7948	2.1526	1.98e-05	0.0013662	NM_016709.2	11992	Auh	transcript	23.1108	25.9264	-0.165855	0.00124159	0.0335637
mmu-miR-146a-5p	1144.77	2572.83	-1.0815	0.0024408	0.042104	NM_016709.2	11992	Auh	transcript	23.1108	25.9264	-0.165855	0.00124159	0.0335637
mmu-miR-365-2-5p	8.11913	1.17918	1.9254	0.0018939	0.035639	NM_016709.2	11992	Auh	transcript	23.1108	25.9264	-0.165855	0.00124159	0.0335637
mmu-miR-467a-5p	101.062	157.027	-0.63987	0.0013446	0.026507	NM_016709.2	11992	Auh	transcript	23.1108	25.9264	-0.165855	0.00124159	0.0335637
mmu-miR-690	1195.04	385.602	1.4425	0.0010865	0.02646	TCONS_00018192	97884	B3galnt2	transcript	2.24326	2.74546	-0.291447	0.00119494	0.0329208
mmu-miR-208a-5p	1.68468	98.5205	-4.8306	5.8e-20	1.2e-17	TCONS_00018192	97884	B3galnt2	transcript	2.24326	2.74546	-0.291447	0.00119494	0.0329208
mmu-miR-214-5p	271.213	165.169	0.69303	6.26e-05	0.0028804	TCONS_00018192	97884	B3galnt2	transcript	2.24326	2.74546	-0.291447	0.00119494	0.0329208
mmu-miR-1983	29.9641	89.2893	-1.379	0.00016096	0.0051261	TCONS_00018192	97884	B3galnt2	transcript	2.24326	2.74546	-0.291447	0.00119494	0.0329208
mmu-miR-200a-3p	143.74	23.9782	1.9969	0.00056829	0.015685	TCONS_00018192	97884	B3galnt2	transcript	2.24326	2.74546	-0.291447	0.00119494	0.0329208
mmu-miR-3470b	336.04	56.7948	2.1526	1.98e-05	0.0013662	TCONS_00018192	97884	B3galnt2	transcript	2.24326	2.74546	-0.291447	0.00119494	0.0329208
mmu-miR-466i-5p	352.593	42.1158	2.344	5.49e-05	0.00284	XM_030250546.2	56386	B4galt6	transcript	1.70533	0.00590867	8.17301	0.00086113	0.0281727
mmu-miR-214-3p	866.854	544.158	0.66229	0.00013468	0.0046466	XM_030250546.2	56386	B4galt6	transcript	1.70533	0.00590867	8.17301	0.00086113	0.0281727
mmu-miR-200a-3p	143.74	23.9782	1.9969	0.00056829	0.015685	XM_030250546.2	56386	B4galt6	transcript	1.70533	0.00590867	8.17301	0.00086113	0.0281727
mmu-miR-214-5p	271.213	165.169	0.69303	6.26e-05	0.0028804	NM_025833.3	66898	Baiap2l1	transcript	2.09682	3.18484	-0.603015	0.00112729	0.0318963
mmu-miR-200a-3p	143.74	23.9782	1.9969	0.00056829	0.015685	NM_025833.3	66898	Baiap2l1	transcript	2.09682	3.18484	-0.603015	0.00112729	0.0318963
mmu-miR-3470b	336.04	56.7948	2.1526	1.98e-05	0.0013662	NM_025833.3	66898	Baiap2l1	transcript	2.09682	3.18484	-0.603015	0.00112729	0.0318963
mmu-miR-146a-5p	1144.77	2572.83	-1.0815	0.0024408	0.042104	NM_025833.3	66898	Baiap2l1	transcript	2.09682	3.18484	-0.603015	0.00112729	0.0318963
mmu-miR-467a-5p	101.062	157.027	-0.63987	0.0013446	0.026507	NM_025833.3	66898	Baiap2l1	transcript	2.09682	3.18484	-0.603015	0.00112729	0.0318963
mmu-miR-214-3p	866.854	544.158	0.66229	0.00013468	0.0046466	NM_020486.2	57278	Bcam	transcript	97.5158	46.6059	1.06512	0.000167128	0.0276354
mmu-miR-466i-5p	352.593	42.1158	2.344	5.49e-05	0.00284	NM_019584.4	56208	Becn1	transcript	13.0022	11.7526	0.145775	0.00117987	0.0327408
mmu-miR-365-1-5p	42.0397	9.35359	1.749	0.00085832	0.022209	NM_019584.4	56208	Becn1	transcript	13.0022	11.7526	0.145775	0.00117987	0.0327408
mmu-miR-690	1195.04	385.602	1.4425	0.0010865	0.02646	NM_019584.4	56208	Becn1	transcript	13.0022	11.7526	0.145775	0.00117987	0.0327408
mmu-miR-467b-5p	101.062	157.027	-0.63987	0.0013446	0.026507	NM_019584.4	56208	Becn1	transcript	13.0022	11.7526	0.145775	0.00117987	0.0327408
mmu-miR-208a-5p	1.68468	98.5205	-4.8306	5.8e-20	1.2e-17	NM_019584.4	56208	Becn1	transcript	13.0022	11.7526	0.145775	0.00117987	0.0327408
mmu-miR-193b-3p	657.266	247.533	1.3911	4.18e-26	1.73e-23	NM_019584.4	56208	Becn1	transcript	13.0022	11.7526	0.145775	0.00117987	0.0327408
mmu-miR-1983	29.9641	89.2893	-1.379	0.00016096	0.0051261	NM_019584.4	56208	Becn1	transcript	13.0022	11.7526	0.145775	0.00117987	0.0327408
mmu-miR-221-3p	2269.82	1235.67	0.8571	8.52e-05	0.0035266	NM_019584.4	56208	Becn1	transcript	13.0022	11.7526	0.145775	0.00117987	0.0327408
mmu-miR-200a-3p	143.74	23.9782	1.9969	0.00056829	0.015685	NM_019584.4	56208	Becn1	transcript	13.0022	11.7526	0.145775	0.00117987	0.0327408
mmu-miR-365-2-5p	8.11913	1.17918	1.9254	0.0018939	0.035639	NM_019584.4	56208	Becn1	transcript	13.0022	11.7526	0.145775	0.00117987	0.0327408
mmu-miR-1195	19.6113	1.98363	2.212	0.0004848	0.014336	NM_019584.4	56208	Becn1	transcript	13.0022	11.7526	0.145775	0.00117987	0.0327408
mmu-miR-214-3p	866.854	544.158	0.66229	0.00013468	0.0046466	TCONS_00015185	14533	Bloc1s1	transcript	4.31854	0	Inf	0.000820671	0.0276354
mmu-miR-214-3p	866.854	544.158	0.66229	0.00013468	0.0046466	NM_001077184.1	12215	Bsg	transcript	229.288	397.283	-0.793008	0.0014193	0.0355126
mmu-miR-193b-3p	657.266	247.533	1.3911	4.18e-26	1.73e-23	NM_001077184.1	12215	Bsg	transcript	229.288	397.283	-0.793008	0.0014193	0.0355126
mmu-miR-214-3p	866.854	544.158	0.66229	0.00013468	0.0046466	NM_146193.2	83962	Btbd1	transcript	36.2804	34.6035	0.0682754	0.00168654	0.0382088
mmu-miR-200a-3p	143.74	23.9782	1.9969	0.00056829	0.015685	NM_146193.2	83962	Btbd1	transcript	36.2804	34.6035	0.0682754	0.00168654	0.0382088
mmu-miR-29b-2-5p	32.6134	115.312	-1.5205	0.0011706	0.026507	NM_025824.4	66882	Bzw1	transcript	17.9692	13.9017	0.370267	0.00246002	0.0472596
mmu-miR-221-3p	2269.82	1235.67	0.8571	8.52e-05	0.0035266	NM_025824.4	66882	Bzw1	transcript	17.9692	13.9017	0.370267	0.00246002	0.0472596
mmu-miR-200a-3p	143.74	23.9782	1.9969	0.00056829	0.015685	NM_025824.4	66882	Bzw1	transcript	17.9692	13.9017	0.370267	0.00246002	0.0472596
mmu-miR-200b-3p	90.9629	28.7971	1.6296	1.15e-10	1.59e-08	NM_001110844.1	12293	Cacna2d1	transcript	0.631283	4.45131	-2.81787	0.000493731	0.0276354
mmu-miR-29b-2-5p	32.6134	115.312	-1.5205	0.0011706	0.026507	NM_001110844.1	12293	Cacna2d1	transcript	0.631283	4.45131	-2.81787	0.000493731	0.0276354
mmu-miR-214-3p	866.854	544.158	0.66229	0.00013468	0.0046466	NM_001110844.1	12293	Cacna2d1	transcript	0.631283	4.45131	-2.81787	0.000493731	0.0276354
mmu-miR-208a-5p	1.68468	98.5205	-4.8306	5.8e-20	1.2e-17	NM_001110844.1	12293	Cacna2d1	transcript	0.631283	4.45131	-2.81787	0.000493731	0.0276354
mmu-miR-1983	29.9641	89.2893	-1.379	0.00016096	0.0051261	NM_001110844.1	12293	Cacna2d1	transcript	0.631283	4.45131	-2.81787	0.000493731	0.0276354
mmu-miR-221-3p	2269.82	1235.67	0.8571	8.52e-05	0.0035266	NM_001110844.1	12293	Cacna2d1	transcript	0.631283	4.45131	-2.81787	0.000493731	0.0276354
mmu-miR-3470b	336.04	56.7948	2.1526	1.98e-05	0.0013662	NM_001110844.1	12293	Cacna2d1	transcript	0.631283	4.45131	-2.81787	0.000493731	0.0276354
mmu-miR-5126	30.4974	5.65546	2.0107	5.18e-05	0.00284	XM_036165784.1	12321	Calu	transcript	10.5439	16.3948	-0.636826	0.00157708	0.0372453
mmu-miR-874-3p	67.1603	160.155	-1.1385	0.0024216	0.042104	XM_036165784.1	12321	Calu	transcript	10.5439	16.3948	-0.636826	0.00157708	0.0372453
mmu-miR-466i-5p	352.593	42.1158	2.344	5.49e-05	0.00284	XM_036165784.1	12321	Calu	transcript	10.5439	16.3948	-0.636826	0.00157708	0.0372453
mmu-miR-29b-2-5p	32.6134	115.312	-1.5205	0.0011706	0.026507	XM_036165784.1	12321	Calu	transcript	10.5439	16.3948	-0.636826	0.00157708	0.0372453
mmu-miR-214-3p	866.854	544.158	0.66229	0.00013468	0.0046466	XM_036165784.1	12321	Calu	transcript	10.5439	16.3948	-0.636826	0.00157708	0.0372453
mmu-miR-467b-5p	101.062	157.027	-0.63987	0.0013446	0.026507	XM_036165784.1	12321	Calu	transcript	10.5439	16.3948	-0.636826	0.00157708	0.0372453
mmu-miR-193b-3p	657.266	247.533	1.3911	4.18e-26	1.73e-23	XM_036165784.1	12321	Calu	transcript	10.5439	16.3948	-0.636826	0.00157708	0.0372453
mmu-miR-200a-3p	143.74	23.9782	1.9969	0.00056829	0.015685	XM_036165784.1	12321	Calu	transcript	10.5439	16.3948	-0.636826	0.00157708	0.0372453
mmu-miR-100-5p	11740	27586.4	-1.185	7.37e-06	0.00060997	XM_036165784.1	12321	Calu	transcript	10.5439	16.3948	-0.636826	0.00157708	0.0372453
mmu-miR-3470b	336.04	56.7948	2.1526	1.98e-05	0.0013662	XM_036165784.1	12321	Calu	transcript	10.5439	16.3948	-0.636826	0.00157708	0.0372453
mmu-miR-467a-5p	101.062	157.027	-0.63987	0.0013446	0.026507	XM_036165784.1	12321	Calu	transcript	10.5439	16.3948	-0.636826	0.00157708	0.0372453
mmu-miR-1195	19.6113	1.98363	2.212	0.0004848	0.014336	XM_036165784.1	12321	Calu	transcript	10.5439	16.3948	-0.636826	0.00157708	0.0372453
mmu-miR-214-3p	866.854	544.158	0.66229	0.00013468	0.0046466	NM_007616.4	12389	Cav1	transcript	43.4254	41.8983	0.0516465	0.000217852	0.0276354
mmu-miR-208a-5p	1.68468	98.5205	-4.8306	5.8e-20	1.2e-17	NM_007616.4	12389	Cav1	transcript	43.4254	41.8983	0.0516465	0.000217852	0.0276354
mmu-miR-221-3p	2269.82	1235.67	0.8571	8.52e-05	0.0035266	NM_007616.4	12389	Cav1	transcript	43.4254	41.8983	0.0516465	0.000217852	0.0276354
mmu-miR-467b-5p	101.062	157.027	-0.63987	0.0013446	0.026507	NM_028444.1	109042	Cavin3	transcript	11.1926	7.66338	0.546492	0.00246959	0.0473207
mmu-miR-200b-3p	90.9629	28.7971	1.6296	1.15e-10	1.59e-08	NM_007624.4	12417	Cbx3	transcript	11.8227	12.4877	-0.0789428	0.000712892	0.0276354
mmu-miR-29b-2-5p	32.6134	115.312	-1.5205	0.0011706	0.026507	NM_007624.4	12417	Cbx3	transcript	11.8227	12.4877	-0.0789428	0.000712892	0.0276354
mmu-miR-3470b	336.04	56.7948	2.1526	1.98e-05	0.0013662	NM_007624.4	12417	Cbx3	transcript	11.8227	12.4877	-0.0789428	0.000712892	0.0276354
mmu-miR-200b-3p	90.9629	28.7971	1.6296	1.15e-10	1.59e-08	NM_172730.2	232236	Ccdc174	transcript	2.48172	2.74255	-0.144172	0.00209921	0.0430152
mmu-miR-466i-5p	352.593	42.1158	2.344	5.49e-05	0.00284	NM_172730.2	232236	Ccdc174	transcript	2.48172	2.74255	-0.144172	0.00209921	0.0430152
mmu-miR-193b-3p	657.266	247.533	1.3911	4.18e-26	1.73e-23	NM_172730.2	232236	Ccdc174	transcript	2.48172	2.74255	-0.144172	0.00209921	0.0430152
mmu-miR-146a-5p	1144.77	2572.83	-1.0815	0.0024408	0.042104	NM_172730.2	232236	Ccdc174	transcript	2.48172	2.74255	-0.144172	0.00209921	0.0430152
mmu-miR-214-3p	866.854	544.158	0.66229	0.00013468	0.0046466	NM_028771.3	52132	Ccdc97	transcript	0.353089	5.23544	-3.89021	0.000248656	0.0276354
mmu-miR-193b-3p	657.266	247.533	1.3911	4.18e-26	1.73e-23	NM_028771.3	52132	Ccdc97	transcript	0.353089	5.23544	-3.89021	0.000248656	0.0276354
novel_1	13879.1	1929.61	2.0063	0.0013125	0.026507	NM_028771.3	52132	Ccdc97	transcript	0.353089	5.23544	-3.89021	0.000248656	0.0276354
mmu-miR-200a-3p	143.74	23.9782	1.9969	0.00056829	0.015685	NM_028771.3	52132	Ccdc97	transcript	0.353089	5.23544	-3.89021	0.000248656	0.0276354
mmu-miR-29b-2-5p	32.6134	115.312	-1.5205	0.0011706	0.026507	NM_010516.2	16007	Ccn1	transcript	11.8013	25.7037	-1.12303	0.00153723	0.0369578
mmu-miR-874-3p	67.1603	160.155	-1.1385	0.0024216	0.042104	XM_006505459.3	12444	Ccnd2	transcript	3.84378	0.0527657	6.18678	0.000467463	0.0276354
mmu-miR-365-1-5p	42.0397	9.35359	1.749	0.00085832	0.022209	XM_006505459.3	12444	Ccnd2	transcript	3.84378	0.0527657	6.18678	0.000467463	0.0276354
mmu-miR-214-5p	271.213	165.169	0.69303	6.26e-05	0.0028804	XM_006505459.3	12444	Ccnd2	transcript	3.84378	0.0527657	6.18678	0.000467463	0.0276354
mmu-miR-1983	29.9641	89.2893	-1.379	0.00016096	0.0051261	XM_006505459.3	12444	Ccnd2	transcript	3.84378	0.0527657	6.18678	0.000467463	0.0276354
mmu-miR-221-3p	2269.82	1235.67	0.8571	8.52e-05	0.0035266	XM_006505459.3	12444	Ccnd2	transcript	3.84378	0.0527657	6.18678	0.000467463	0.0276354
mmu-miR-200a-3p	143.74	23.9782	1.9969	0.00056829	0.015685	XM_006505459.3	12444	Ccnd2	transcript	3.84378	0.0527657	6.18678	0.000467463	0.0276354
mmu-miR-146a-5p	1144.77	2572.83	-1.0815	0.0024408	0.042104	XM_006505459.3	12444	Ccnd2	transcript	3.84378	0.0527657	6.18678	0.000467463	0.0276354
mmu-miR-365-2-5p	8.11913	1.17918	1.9254	0.0018939	0.035639	XM_006505459.3	12444	Ccnd2	transcript	3.84378	0.0527657	6.18678	0.000467463	0.0276354
mmu-miR-365-1-5p	42.0397	9.35359	1.749	0.00085832	0.022209	NM_009842.3	12476	Cd151	transcript	26.5868	20.864	0.349697	0.000555559	0.0276354
mmu-miR-200a-3p	143.74	23.9782	1.9969	0.00056829	0.015685	NM_009842.3	12476	Cd151	transcript	26.5868	20.864	0.349697	0.000555559	0.0276354
mmu-miR-365-2-5p	8.11913	1.17918	1.9254	0.0018939	0.035639	NM_009842.3	12476	Cd151	transcript	26.5868	20.864	0.349697	0.000555559	0.0276354
mmu-miR-874-3p	67.1603	160.155	-1.1385	0.0024216	0.042104	XM_030246370.1	72729	Cdc42se2	transcript	1.75393	0.133176	3.71919	3e-05	0.0155632
mmu-miR-214-3p	866.854	544.158	0.66229	0.00013468	0.0046466	XM_030246370.1	72729	Cdc42se2	transcript	1.75393	0.133176	3.71919	3e-05	0.0155632
mmu-miR-193b-3p	657.266	247.533	1.3911	4.18e-26	1.73e-23	XM_030246370.1	72729	Cdc42se2	transcript	1.75393	0.133176	3.71919	3e-05	0.0155632
mmu-miR-200a-3p	143.74	23.9782	1.9969	0.00056829	0.015685	XM_030246370.1	72729	Cdc42se2	transcript	1.75393	0.133176	3.71919	3e-05	0.0155632
mmu-miR-466i-5p	352.593	42.1158	2.344	5.49e-05	0.00284	NM_177673.2	230967	Cep104	transcript	3.10235	2.01391	0.623361	0.000626734	0.0276354
mmu-miR-214-3p	866.854	544.158	0.66229	0.00013468	0.0046466	NM_177673.2	230967	Cep104	transcript	3.10235	2.01391	0.623361	0.000626734	0.0276354
mmu-miR-214-5p	271.213	165.169	0.69303	6.26e-05	0.0028804	NM_177673.2	230967	Cep104	transcript	3.10235	2.01391	0.623361	0.000626734	0.0276354
mmu-miR-3470b	336.04	56.7948	2.1526	1.98e-05	0.0013662	NM_177673.2	230967	Cep104	transcript	3.10235	2.01391	0.623361	0.000626734	0.0276354
mmu-miR-200a-3p	143.74	23.9782	1.9969	0.00056829	0.015685	NM_019769.3	56398	Chp1	transcript	20.4459	19.9114	0.0382164	0.00040545	0.0276354
mmu-miR-200b-3p	90.9629	28.7971	1.6296	1.15e-10	1.59e-08	NM_144807.3	212862	Chpt1	transcript	60.0128	62.0084	-0.0471931	0.00168964	0.0382088
mmu-miR-466i-5p	352.593	42.1158	2.344	5.49e-05	0.00284	NM_144807.3	212862	Chpt1	transcript	60.0128	62.0084	-0.0471931	0.00168964	0.0382088
mmu-miR-365-1-5p	42.0397	9.35359	1.749	0.00085832	0.022209	NM_144807.3	212862	Chpt1	transcript	60.0128	62.0084	-0.0471931	0.00168964	0.0382088
mmu-miR-29b-2-5p	32.6134	115.312	-1.5205	0.0011706	0.026507	NM_144807.3	212862	Chpt1	transcript	60.0128	62.0084	-0.0471931	0.00168964	0.0382088
mmu-miR-208a-5p	1.68468	98.5205	-4.8306	5.8e-20	1.2e-17	NM_144807.3	212862	Chpt1	transcript	60.0128	62.0084	-0.0471931	0.00168964	0.0382088
mmu-miR-1983	29.9641	89.2893	-1.379	0.00016096	0.0051261	NM_144807.3	212862	Chpt1	transcript	60.0128	62.0084	-0.0471931	0.00168964	0.0382088
mmu-miR-146a-5p	1144.77	2572.83	-1.0815	0.0024408	0.042104	NM_144807.3	212862	Chpt1	transcript	60.0128	62.0084	-0.0471931	0.00168964	0.0382088
mmu-miR-365-2-5p	8.11913	1.17918	1.9254	0.0018939	0.035639	NM_144807.3	212862	Chpt1	transcript	60.0128	62.0084	-0.0471931	0.00168964	0.0382088
mmu-miR-466i-5p	352.593	42.1158	2.344	5.49e-05	0.00284	TCONS_00008259	243764	Chrm2	transcript	7.92449	7.05464	0.167746	0.000185113	0.0276354
mmu-miR-29b-2-5p	32.6134	115.312	-1.5205	0.0011706	0.026507	TCONS_00008259	243764	Chrm2	transcript	7.92449	7.05464	0.167746	0.000185113	0.0276354
mmu-miR-3470b	336.04	56.7948	2.1526	1.98e-05	0.0013662	TCONS_00008259	243764	Chrm2	transcript	7.92449	7.05464	0.167746	0.000185113	0.0276354
mmu-miR-466i-5p	352.593	42.1158	2.344	5.49e-05	0.00284	NM_173735.3	217732	Cipc	transcript	2.22002	0.086604	4.68	0.000543181	0.0276354
mmu-miR-214-3p	866.854	544.158	0.66229	0.00013468	0.0046466	NM_173735.3	217732	Cipc	transcript	2.22002	0.086604	4.68	0.000543181	0.0276354
mmu-miR-467b-5p	101.062	157.027	-0.63987	0.0013446	0.026507	NM_173735.3	217732	Cipc	transcript	2.22002	0.086604	4.68	0.000543181	0.0276354
mmu-miR-208a-5p	1.68468	98.5205	-4.8306	5.8e-20	1.2e-17	NM_173735.3	217732	Cipc	transcript	2.22002	0.086604	4.68	0.000543181	0.0276354
mmu-miR-467a-5p	101.062	157.027	-0.63987	0.0013446	0.026507	NM_173735.3	217732	Cipc	transcript	2.22002	0.086604	4.68	0.000543181	0.0276354
mmu-miR-146a-5p	1144.77	2572.83	-1.0815	0.0024408	0.042104	XM_030243931.2	102414	Clk3	transcript	0.956092	1.03288	-0.111446	0.00169544	0.0382088
mmu-miR-466i-5p	352.593	42.1158	2.344	5.49e-05	0.00284	NM_001081047.1	194231	Cnksr1	transcript	5.00599	1.72223	1.53938	0.00208512	0.0430152
mmu-miR-200b-3p	90.9629	28.7971	1.6296	1.15e-10	1.59e-08	TCONS_00016414	104625	Cnot6	transcript	2.84629	0.00193633	10.5215	0.000918266	0.0292165
mmu-miR-690	1195.04	385.602	1.4425	0.0010865	0.02646	TCONS_00016414	104625	Cnot6	transcript	2.84629	0.00193633	10.5215	0.000918266	0.0292165
mmu-miR-467b-5p	101.062	157.027	-0.63987	0.0013446	0.026507	TCONS_00016414	104625	Cnot6	transcript	2.84629	0.00193633	10.5215	0.000918266	0.0292165
mmu-miR-193b-3p	657.266	247.533	1.3911	4.18e-26	1.73e-23	TCONS_00016414	104625	Cnot6	transcript	2.84629	0.00193633	10.5215	0.000918266	0.0292165
mmu-miR-200a-3p	143.74	23.9782	1.9969	0.00056829	0.015685	TCONS_00016414	104625	Cnot6	transcript	2.84629	0.00193633	10.5215	0.000918266	0.0292165
mmu-miR-3470b	336.04	56.7948	2.1526	1.98e-05	0.0013662	TCONS_00016414	104625	Cnot6	transcript	2.84629	0.00193633	10.5215	0.000918266	0.0292165
mmu-miR-146a-5p	1144.77	2572.83	-1.0815	0.0024408	0.042104	TCONS_00016414	104625	Cnot6	transcript	2.84629	0.00193633	10.5215	0.000918266	0.0292165
mmu-miR-29b-2-5p	32.6134	115.312	-1.5205	0.0011706	0.026507	XM_030245515.2	12808	Cobl	transcript	1.22489	0.014136	6.43713	0.000731975	0.0276354
mmu-miR-690	1195.04	385.602	1.4425	0.0010865	0.02646	XM_030245515.2	12808	Cobl	transcript	1.22489	0.014136	6.43713	0.000731975	0.0276354
mmu-miR-214-3p	866.854	544.158	0.66229	0.00013468	0.0046466	XM_030245515.2	12808	Cobl	transcript	1.22489	0.014136	6.43713	0.000731975	0.0276354
mmu-miR-208a-5p	1.68468	98.5205	-4.8306	5.8e-20	1.2e-17	XM_030245515.2	12808	Cobl	transcript	1.22489	0.014136	6.43713	0.000731975	0.0276354
mmu-miR-214-5p	271.213	165.169	0.69303	6.26e-05	0.0028804	XM_030245515.2	12808	Cobl	transcript	1.22489	0.014136	6.43713	0.000731975	0.0276354
mmu-miR-221-3p	2269.82	1235.67	0.8571	8.52e-05	0.0035266	XM_030245515.2	12808	Cobl	transcript	1.22489	0.014136	6.43713	0.000731975	0.0276354
mmu-miR-200a-3p	143.74	23.9782	1.9969	0.00056829	0.015685	XM_030245515.2	12808	Cobl	transcript	1.22489	0.014136	6.43713	0.000731975	0.0276354
mmu-miR-3470b	336.04	56.7948	2.1526	1.98e-05	0.0013662	XM_030245515.2	12808	Cobl	transcript	1.22489	0.014136	6.43713	0.000731975	0.0276354
mmu-miR-874-3p	67.1603	160.155	-1.1385	0.0024216	0.042104	NM_130449.2	140792	Colec12	transcript	3.99678	3.31964	0.26781	0.00250276	0.0477182
mmu-miR-466i-5p	352.593	42.1158	2.344	5.49e-05	0.00284	NM_130449.2	140792	Colec12	transcript	3.99678	3.31964	0.26781	0.00250276	0.0477182
mmu-miR-29b-2-5p	32.6134	115.312	-1.5205	0.0011706	0.026507	NM_130449.2	140792	Colec12	transcript	3.99678	3.31964	0.26781	0.00250276	0.0477182
mmu-miR-214-3p	866.854	544.158	0.66229	0.00013468	0.0046466	NM_130449.2	140792	Colec12	transcript	3.99678	3.31964	0.26781	0.00250276	0.0477182
mmu-miR-208a-5p	1.68468	98.5205	-4.8306	5.8e-20	1.2e-17	NM_130449.2	140792	Colec12	transcript	3.99678	3.31964	0.26781	0.00250276	0.0477182
mmu-miR-214-5p	271.213	165.169	0.69303	6.26e-05	0.0028804	NM_130449.2	140792	Colec12	transcript	3.99678	3.31964	0.26781	0.00250276	0.0477182
mmu-miR-3470b	336.04	56.7948	2.1526	1.98e-05	0.0013662	NM_130449.2	140792	Colec12	transcript	3.99678	3.31964	0.26781	0.00250276	0.0477182
mmu-miR-146a-5p	1144.77	2572.83	-1.0815	0.0024408	0.042104	NM_130449.2	140792	Colec12	transcript	3.99678	3.31964	0.26781	0.00250276	0.0477182
mmu-miR-221-3p	2269.82	1235.67	0.8571	8.52e-05	0.0035266	XM_036157391.1	12847	Copa	transcript	4.17091	0.019118	7.76929	0.00127269	0.0340844
mmu-miR-466i-5p	352.593	42.1158	2.344	5.49e-05	0.00284	TCONS_00015694	216961	Coro6	transcript	25.1868	0.408246	5.94709	0.000133892	0.0276354
mmu-miR-467a-5p	101.062	157.027	-0.63987	0.0013446	0.026507	TCONS_00015694	216961	Coro6	transcript	25.1868	0.408246	5.94709	0.000133892	0.0276354
mmu-miR-200b-3p	90.9629	28.7971	1.6296	1.15e-10	1.59e-08	NM_001017429.2	12856	Cox17	transcript	100.01	129.573	-0.373622	0.00264968	0.0491363
mmu-miR-466i-5p	352.593	42.1158	2.344	5.49e-05	0.00284	NM_001017429.2	12856	Cox17	transcript	100.01	129.573	-0.373622	0.00264968	0.0491363
mmu-miR-29b-2-5p	32.6134	115.312	-1.5205	0.0011706	0.026507	NM_001017429.2	12856	Cox17	transcript	100.01	129.573	-0.373622	0.00264968	0.0491363
mmu-miR-214-3p	866.854	544.158	0.66229	0.00013468	0.0046466	NM_001017429.2	12856	Cox17	transcript	100.01	129.573	-0.373622	0.00264968	0.0491363
mmu-miR-208a-5p	1.68468	98.5205	-4.8306	5.8e-20	1.2e-17	NM_001017429.2	12856	Cox17	transcript	100.01	129.573	-0.373622	0.00264968	0.0491363
mmu-miR-193b-3p	657.266	247.533	1.3911	4.18e-26	1.73e-23	NM_001017429.2	12856	Cox17	transcript	100.01	129.573	-0.373622	0.00264968	0.0491363
mmu-miR-3470b	336.04	56.7948	2.1526	1.98e-05	0.0013662	NM_001017429.2	12856	Cox17	transcript	100.01	129.573	-0.373622	0.00264968	0.0491363
mmu-miR-467a-5p	101.062	157.027	-0.63987	0.0013446	0.026507	NM_001017429.2	12856	Cox17	transcript	100.01	129.573	-0.373622	0.00264968	0.0491363
mmu-miR-690	1195.04	385.602	1.4425	0.0010865	0.02646	NM_009942.2	12859	Cox5b	transcript	296.674	519.535	-0.808342	0.000516312	0.0276354
novel_1	13879.1	1929.61	2.0063	0.0013125	0.026507	NM_013494.4	12876	Cpe	transcript	42.1264	49.5842	-0.235157	0.000143815	0.0276354
mmu-miR-200b-3p	90.9629	28.7971	1.6296	1.15e-10	1.59e-08	XM_036157952.1	12908	Crat	transcript	3.05654	0	Inf	5.87e-05	0.0211184
mmu-miR-874-3p	67.1603	160.155	-1.1385	0.0024216	0.042104	XM_036157952.1	12908	Crat	transcript	3.05654	0	Inf	5.87e-05	0.0211184
mmu-miR-365-1-5p	42.0397	9.35359	1.749	0.00085832	0.022209	XM_036157952.1	12908	Crat	transcript	3.05654	0	Inf	5.87e-05	0.0211184
mmu-miR-214-3p	866.854	544.158	0.66229	0.00013468	0.0046466	XM_036157952.1	12908	Crat	transcript	3.05654	0	Inf	5.87e-05	0.0211184
mmu-miR-214-5p	271.213	165.169	0.69303	6.26e-05	0.0028804	XM_036157952.1	12908	Crat	transcript	3.05654	0	Inf	5.87e-05	0.0211184
mmu-miR-1983	29.9641	89.2893	-1.379	0.00016096	0.0051261	XM_036157952.1	12908	Crat	transcript	3.05654	0	Inf	5.87e-05	0.0211184
mmu-miR-3470b	336.04	56.7948	2.1526	1.98e-05	0.0013662	XM_036157952.1	12908	Crat	transcript	3.05654	0	Inf	5.87e-05	0.0211184
mmu-miR-365-2-5p	8.11913	1.17918	1.9254	0.0018939	0.035639	XM_036157952.1	12908	Crat	transcript	3.05654	0	Inf	5.87e-05	0.0211184
mmu-miR-466i-5p	352.593	42.1158	2.344	5.49e-05	0.00284	NM_001025432.1	12914	Crebbp	transcript	8.99505	10.1943	-0.18056	0.000677808	0.0276354
mmu-miR-365-1-5p	42.0397	9.35359	1.749	0.00085832	0.022209	NM_001025432.1	12914	Crebbp	transcript	8.99505	10.1943	-0.18056	0.000677808	0.0276354
mmu-miR-690	1195.04	385.602	1.4425	0.0010865	0.02646	NM_001025432.1	12914	Crebbp	transcript	8.99505	10.1943	-0.18056	0.000677808	0.0276354
mmu-miR-208a-5p	1.68468	98.5205	-4.8306	5.8e-20	1.2e-17	NM_001025432.1	12914	Crebbp	transcript	8.99505	10.1943	-0.18056	0.000677808	0.0276354
mmu-miR-1983	29.9641	89.2893	-1.379	0.00016096	0.0051261	NM_001025432.1	12914	Crebbp	transcript	8.99505	10.1943	-0.18056	0.000677808	0.0276354
mmu-miR-3470b	336.04	56.7948	2.1526	1.98e-05	0.0013662	NM_001025432.1	12914	Crebbp	transcript	8.99505	10.1943	-0.18056	0.000677808	0.0276354
mmu-miR-365-2-5p	8.11913	1.17918	1.9254	0.0018939	0.035639	NM_001025432.1	12914	Crebbp	transcript	8.99505	10.1943	-0.18056	0.000677808	0.0276354
mmu-miR-467a-5p	101.062	157.027	-0.63987	0.0013446	0.026507	NM_001025432.1	12914	Crebbp	transcript	8.99505	10.1943	-0.18056	0.000677808	0.0276354
mmu-miR-29b-2-5p	32.6134	115.312	-1.5205	0.0011706	0.026507	TCONS_00004132	229663	Csde1	transcript	48.2189	63.0905	-0.387826	0.0012973	0.0342571
mmu-miR-214-3p	866.854	544.158	0.66229	0.00013468	0.0046466	TCONS_00004132	229663	Csde1	transcript	48.2189	63.0905	-0.387826	0.0012973	0.0342571
mmu-miR-467a-5p	101.062	157.027	-0.63987	0.0013446	0.026507	TCONS_00004132	229663	Csde1	transcript	48.2189	63.0905	-0.387826	0.0012973	0.0342571
mmu-miR-200b-3p	90.9629	28.7971	1.6296	1.15e-10	1.59e-08	TCONS_00012867	214897	Csnk1g1	transcript	0.820922	0.006047	7.08488	0.000423387	0.0276354
mmu-miR-365-1-5p	42.0397	9.35359	1.749	0.00085832	0.022209	TCONS_00012867	214897	Csnk1g1	transcript	0.820922	0.006047	7.08488	0.000423387	0.0276354
mmu-miR-29b-2-5p	32.6134	115.312	-1.5205	0.0011706	0.026507	TCONS_00012867	214897	Csnk1g1	transcript	0.820922	0.006047	7.08488	0.000423387	0.0276354
mmu-miR-690	1195.04	385.602	1.4425	0.0010865	0.02646	TCONS_00012867	214897	Csnk1g1	transcript	0.820922	0.006047	7.08488	0.000423387	0.0276354
mmu-miR-467b-5p	101.062	157.027	-0.63987	0.0013446	0.026507	TCONS_00012867	214897	Csnk1g1	transcript	0.820922	0.006047	7.08488	0.000423387	0.0276354
mmu-miR-193b-3p	657.266	247.533	1.3911	4.18e-26	1.73e-23	TCONS_00012867	214897	Csnk1g1	transcript	0.820922	0.006047	7.08488	0.000423387	0.0276354
mmu-miR-200a-3p	143.74	23.9782	1.9969	0.00056829	0.015685	TCONS_00012867	214897	Csnk1g1	transcript	0.820922	0.006047	7.08488	0.000423387	0.0276354
mmu-miR-3470b	336.04	56.7948	2.1526	1.98e-05	0.0013662	TCONS_00012867	214897	Csnk1g1	transcript	0.820922	0.006047	7.08488	0.000423387	0.0276354
mmu-miR-365-2-5p	8.11913	1.17918	1.9254	0.0018939	0.035639	TCONS_00012867	214897	Csnk1g1	transcript	0.820922	0.006047	7.08488	0.000423387	0.0276354
mmu-miR-874-3p	67.1603	160.155	-1.1385	0.0024216	0.042104	NM_009818.1	12385	Ctnna1	transcript	89.2245	90.2244	-0.0160775	0.000857497	0.0281337
mmu-miR-29b-2-5p	32.6134	115.312	-1.5205	0.0011706	0.026507	NM_009818.1	12385	Ctnna1	transcript	89.2245	90.2244	-0.0160775	0.000857497	0.0281337
mmu-miR-214-3p	866.854	544.158	0.66229	0.00013468	0.0046466	NM_009818.1	12385	Ctnna1	transcript	89.2245	90.2244	-0.0160775	0.000857497	0.0281337
mmu-miR-208a-5p	1.68468	98.5205	-4.8306	5.8e-20	1.2e-17	NM_009818.1	12385	Ctnna1	transcript	89.2245	90.2244	-0.0160775	0.000857497	0.0281337
mmu-miR-193b-3p	657.266	247.533	1.3911	4.18e-26	1.73e-23	NM_009818.1	12385	Ctnna1	transcript	89.2245	90.2244	-0.0160775	0.000857497	0.0281337
novel_1	13879.1	1929.61	2.0063	0.0013125	0.026507	NM_009818.1	12385	Ctnna1	transcript	89.2245	90.2244	-0.0160775	0.000857497	0.0281337
mmu-miR-200a-3p	143.74	23.9782	1.9969	0.00056829	0.015685	NM_009818.1	12385	Ctnna1	transcript	89.2245	90.2244	-0.0160775	0.000857497	0.0281337
mmu-miR-3470b	336.04	56.7948	2.1526	1.98e-05	0.0013662	NM_009818.1	12385	Ctnna1	transcript	89.2245	90.2244	-0.0160775	0.000857497	0.0281337
mmu-miR-690	1195.04	385.602	1.4425	0.0010865	0.02646	NM_001165902.1	12387	Ctnnb1	transcript	1.01086	0.074119	3.76959	0.000164837	0.0276354
mmu-miR-214-3p	866.854	544.158	0.66229	0.00013468	0.0046466	NM_001165902.1	12387	Ctnnb1	transcript	1.01086	0.074119	3.76959	0.000164837	0.0276354
mmu-miR-467b-5p	101.062	157.027	-0.63987	0.0013446	0.026507	NM_001165902.1	12387	Ctnnb1	transcript	1.01086	0.074119	3.76959	0.000164837	0.0276354
mmu-miR-193b-3p	657.266	247.533	1.3911	4.18e-26	1.73e-23	NM_001165902.1	12387	Ctnnb1	transcript	1.01086	0.074119	3.76959	0.000164837	0.0276354
mmu-miR-1983	29.9641	89.2893	-1.379	0.00016096	0.0051261	NM_001165902.1	12387	Ctnnb1	transcript	1.01086	0.074119	3.76959	0.000164837	0.0276354
mmu-miR-3470b	336.04	56.7948	2.1526	1.98e-05	0.0013662	NM_001165902.1	12387	Ctnnb1	transcript	1.01086	0.074119	3.76959	0.000164837	0.0276354
mmu-miR-690	1195.04	385.602	1.4425	0.0010865	0.02646	NM_007798.3	13030	Ctsb	transcript	44.5757	45.1527	-0.018554	7.35e-05	0.0248953
mmu-miR-214-3p	866.854	544.158	0.66229	0.00013468	0.0046466	NM_007798.3	13030	Ctsb	transcript	44.5757	45.1527	-0.018554	7.35e-05	0.0248953
mmu-miR-6538	304.502	74.5948	1.8593	7.2e-07	7.45e-05	NM_007798.3	13030	Ctsb	transcript	44.5757	45.1527	-0.018554	7.35e-05	0.0248953
mmu-miR-221-3p	2269.82	1235.67	0.8571	8.52e-05	0.0035266	NM_007798.3	13030	Ctsb	transcript	44.5757	45.1527	-0.018554	7.35e-05	0.0248953
mmu-miR-3470b	336.04	56.7948	2.1526	1.98e-05	0.0013662	NM_007798.3	13030	Ctsb	transcript	44.5757	45.1527	-0.018554	7.35e-05	0.0248953
mmu-miR-146a-5p	1144.77	2572.83	-1.0815	0.0024408	0.042104	NM_007798.3	13030	Ctsb	transcript	44.5757	45.1527	-0.018554	7.35e-05	0.0248953
mmu-miR-874-3p	67.1603	160.155	-1.1385	0.0024216	0.042104	NM_007802.4	13038	Ctsk	transcript	3.1683	1.31973	1.26347	0.000832761	0.0278144
mmu-miR-214-3p	866.854	544.158	0.66229	0.00013468	0.0046466	NM_198013.3	103841	Cuedc1	transcript	9.33807	8.4224	0.148893	0.0015783	0.0372453
mmu-miR-3470b	336.04	56.7948	2.1526	1.98e-05	0.0013662	NM_026072.1	67285	Cwc27	transcript	4.56611	4.21794	0.114426	9.62e-05	0.0264941
mmu-miR-874-3p	67.1603	160.155	-1.1385	0.0024216	0.042104	NM_001012477.2	20315	Cxcl12	transcript	8.72303	23.6765	-1.44055	0.000741939	0.0276354
mmu-miR-466i-5p	352.593	42.1158	2.344	5.49e-05	0.00284	NM_001012477.2	20315	Cxcl12	transcript	8.72303	23.6765	-1.44055	0.000741939	0.0276354
mmu-miR-29b-2-5p	32.6134	115.312	-1.5205	0.0011706	0.026507	NM_001012477.2	20315	Cxcl12	transcript	8.72303	23.6765	-1.44055	0.000741939	0.0276354
mmu-miR-214-3p	866.854	544.158	0.66229	0.00013468	0.0046466	NM_001012477.2	20315	Cxcl12	transcript	8.72303	23.6765	-1.44055	0.000741939	0.0276354
mmu-miR-214-5p	271.213	165.169	0.69303	6.26e-05	0.0028804	NM_001012477.2	20315	Cxcl12	transcript	8.72303	23.6765	-1.44055	0.000741939	0.0276354
mmu-miR-1983	29.9641	89.2893	-1.379	0.00016096	0.0051261	NM_001012477.2	20315	Cxcl12	transcript	8.72303	23.6765	-1.44055	0.000741939	0.0276354
mmu-miR-200a-3p	143.74	23.9782	1.9969	0.00056829	0.015685	NM_001012477.2	20315	Cxcl12	transcript	8.72303	23.6765	-1.44055	0.000741939	0.0276354
mmu-miR-214-5p	271.213	165.169	0.69303	6.26e-05	0.0028804	TCONS_00010636	19158	Cyth2	transcript	2.83748	0	Inf	0.000820671	0.0276354
mmu-miR-3470b	336.04	56.7948	2.1526	1.98e-05	0.0013662	TCONS_00010636	19158	Cyth2	transcript	2.83748	0	Inf	0.000820671	0.0276354
mmu-miR-874-3p	67.1603	160.155	-1.1385	0.0024216	0.042104	NM_025600.2	66498	Dda1	transcript	5.91252	6.16339	-0.0599504	0.000969153	0.0297987
mmu-miR-6538	304.502	74.5948	1.8593	7.2e-07	7.45e-05	NM_025600.2	66498	Dda1	transcript	5.91252	6.16339	-0.0599504	0.000969153	0.0297987
novel_1	13879.1	1929.61	2.0063	0.0013125	0.026507	NM_025600.2	66498	Dda1	transcript	5.91252	6.16339	-0.0599504	0.000969153	0.0297987
mmu-miR-874-3p	67.1603	160.155	-1.1385	0.0024216	0.042104	NM_054046.5	23854	Def8	transcript	8.18934	6.47494	0.33888	0.0016116	0.037419
mmu-miR-466i-5p	352.593	42.1158	2.344	5.49e-05	0.00284	NM_054046.5	23854	Def8	transcript	8.18934	6.47494	0.33888	0.0016116	0.037419
mmu-miR-214-3p	866.854	544.158	0.66229	0.00013468	0.0046466	NM_054046.5	23854	Def8	transcript	8.18934	6.47494	0.33888	0.0016116	0.037419
mmu-miR-193b-3p	657.266	247.533	1.3911	4.18e-26	1.73e-23	NM_054046.5	23854	Def8	transcript	8.18934	6.47494	0.33888	0.0016116	0.037419
mmu-miR-1983	29.9641	89.2893	-1.379	0.00016096	0.0051261	NM_054046.5	23854	Def8	transcript	8.18934	6.47494	0.33888	0.0016116	0.037419
mmu-miR-466i-5p	352.593	42.1158	2.344	5.49e-05	0.00284	XM_006518778.1	211922	Dennd6a	transcript	0.97065	0.0248183	5.28947	0.00216379	0.0438208
mmu-miR-29b-2-5p	32.6134	115.312	-1.5205	0.0011706	0.026507	XM_006518778.1	211922	Dennd6a	transcript	0.97065	0.0248183	5.28947	0.00216379	0.0438208
mmu-miR-1983	29.9641	89.2893	-1.379	0.00016096	0.0051261	XM_006518778.1	211922	Dennd6a	transcript	0.97065	0.0248183	5.28947	0.00216379	0.0438208
mmu-miR-221-3p	2269.82	1235.67	0.8571	8.52e-05	0.0035266	XM_006518778.1	211922	Dennd6a	transcript	0.97065	0.0248183	5.28947	0.00216379	0.0438208
mmu-miR-200a-3p	143.74	23.9782	1.9969	0.00056829	0.015685	XM_006518778.1	211922	Dennd6a	transcript	0.97065	0.0248183	5.28947	0.00216379	0.0438208
mmu-miR-467a-5p	101.062	157.027	-0.63987	0.0013446	0.026507	XM_006518778.1	211922	Dennd6a	transcript	0.97065	0.0248183	5.28947	0.00216379	0.0438208
mmu-miR-221-3p	2269.82	1235.67	0.8571	8.52e-05	0.0035266	NM_026603.4	68184	Denr	transcript	7.89763	8.95137	-0.180688	0.00172768	0.0384836
mmu-miR-100-5p	11740	27586.4	-1.185	7.37e-06	0.00060997	NM_026603.4	68184	Denr	transcript	7.89763	8.95137	-0.180688	0.00172768	0.0384836
mmu-miR-467a-5p	101.062	157.027	-0.63987	0.0013446	0.026507	NM_026603.4	68184	Denr	transcript	7.89763	8.95137	-0.180688	0.00172768	0.0384836
mmu-miR-200b-3p	90.9629	28.7971	1.6296	1.15e-10	1.59e-08	XM_006509166.5	50768	Dlc1	transcript	17.5203	7.76475	1.17402	0.00129218	0.0342571
mmu-miR-208a-5p	1.68468	98.5205	-4.8306	5.8e-20	1.2e-17	XM_006509166.5	50768	Dlc1	transcript	17.5203	7.76475	1.17402	0.00129218	0.0342571
mmu-miR-200a-3p	143.74	23.9782	1.9969	0.00056829	0.015685	XM_006509166.5	50768	Dlc1	transcript	17.5203	7.76475	1.17402	0.00129218	0.0342571
mmu-miR-1983	29.9641	89.2893	-1.379	0.00016096	0.0051261	XM_030251887.2	54485	Dll4	transcript	1.47289	0	Inf	0.000820671	0.0276354
mmu-miR-3470b	336.04	56.7948	2.1526	1.98e-05	0.0013662	XM_030251887.2	54485	Dll4	transcript	1.47289	0	Inf	0.000820671	0.0276354
mmu-miR-874-3p	67.1603	160.155	-1.1385	0.0024216	0.042104	TCONS_00023739	76594	Dnajc18	transcript	1.93372	0	Inf	0.000820671	0.0276354
mmu-miR-214-3p	866.854	544.158	0.66229	0.00013468	0.0046466	TCONS_00023739	76594	Dnajc18	transcript	1.93372	0	Inf	0.000820671	0.0276354
mmu-miR-221-3p	2269.82	1235.67	0.8571	8.52e-05	0.0035266	TCONS_00023739	76594	Dnajc18	transcript	1.93372	0	Inf	0.000820671	0.0276354
mmu-miR-200a-3p	143.74	23.9782	1.9969	0.00056829	0.015685	TCONS_00023739	76594	Dnajc18	transcript	1.93372	0	Inf	0.000820671	0.0276354
mmu-miR-146a-5p	1144.77	2572.83	-1.0815	0.0024408	0.042104	TCONS_00023739	76594	Dnajc18	transcript	1.93372	0	Inf	0.000820671	0.0276354
mmu-miR-193b-3p	657.266	247.533	1.3911	4.18e-26	1.73e-23	NM_019795.5	56354	Dnajc7	transcript	16.878	16.6736	0.0175825	0.000261152	0.0276354
mmu-miR-221-3p	2269.82	1235.67	0.8571	8.52e-05	0.0035266	NM_019795.5	56354	Dnajc7	transcript	16.878	16.6736	0.0175825	0.000261152	0.0276354
mmu-miR-1195	19.6113	1.98363	2.212	0.0004848	0.014336	NM_019795.5	56354	Dnajc7	transcript	16.878	16.6736	0.0175825	0.000261152	0.0276354
mmu-miR-193b-3p	657.266	247.533	1.3911	4.18e-26	1.73e-23	NM_001110831.1	13437	Dnpep	transcript	10.0334	11.1932	-0.157819	0.00227821	0.0450787
mmu-miR-466i-5p	352.593	42.1158	2.344	5.49e-05	0.00284	TCONS_00000054	13518	Dst	transcript	5.41743	0.414156	3.70936	0.00225289	0.0446545
mmu-miR-29b-2-5p	32.6134	115.312	-1.5205	0.0011706	0.026507	TCONS_00000054	13518	Dst	transcript	5.41743	0.414156	3.70936	0.00225289	0.0446545
mmu-miR-208a-5p	1.68468	98.5205	-4.8306	5.8e-20	1.2e-17	TCONS_00000054	13518	Dst	transcript	5.41743	0.414156	3.70936	0.00225289	0.0446545
mmu-miR-214-5p	271.213	165.169	0.69303	6.26e-05	0.0028804	TCONS_00000054	13518	Dst	transcript	5.41743	0.414156	3.70936	0.00225289	0.0446545
mmu-miR-3470b	336.04	56.7948	2.1526	1.98e-05	0.0013662	TCONS_00000054	13518	Dst	transcript	5.41743	0.414156	3.70936	0.00225289	0.0446545
mmu-miR-146a-5p	1144.77	2572.83	-1.0815	0.0024408	0.042104	TCONS_00000054	13518	Dst	transcript	5.41743	0.414156	3.70936	0.00225289	0.0446545
mmu-miR-146a-5p	1144.77	2572.83	-1.0815	0.0024408	0.042104	NM_019771.2	56431	Dstn	transcript	78.1587	21.7647	1.84442	2.99e-05	0.0155632
mmu-miR-874-3p	67.1603	160.155	-1.1385	0.0024216	0.042104	NM_026824.4	68730	Dus1l	transcript	0	3.13193	#NAME?	0.000987532	0.0299274
mmu-miR-874-3p	67.1603	160.155	-1.1385	0.0024216	0.042104	NM_027727.3	69190	Dym	transcript	21.0629	19.308	0.125505	0.00123487	0.0335637
mmu-miR-466i-5p	352.593	42.1158	2.344	5.49e-05	0.00284	NM_027727.3	69190	Dym	transcript	21.0629	19.308	0.125505	0.00123487	0.0335637
mmu-miR-200a-3p	143.74	23.9782	1.9969	0.00056829	0.015685	NM_027727.3	69190	Dym	transcript	21.0629	19.308	0.125505	0.00123487	0.0335637
mmu-miR-146a-5p	1144.77	2572.83	-1.0815	0.0024408	0.042104	NM_027727.3	69190	Dym	transcript	21.0629	19.308	0.125505	0.00123487	0.0335637
mmu-miR-193b-3p	657.266	247.533	1.3911	4.18e-26	1.73e-23	NM_007911.5	13643	Efnb3	transcript	53.9193	20.2661	1.41173	0.000366362	0.0276354
mmu-miR-3470b	336.04	56.7948	2.1526	1.98e-05	0.0013662	NM_007911.5	13643	Efnb3	transcript	53.9193	20.2661	1.41173	0.000366362	0.0276354
mmu-miR-467a-5p	101.062	157.027	-0.63987	0.0013446	0.026507	NM_007911.5	13643	Efnb3	transcript	53.9193	20.2661	1.41173	0.000366362	0.0276354
mmu-miR-193b-3p	657.266	247.533	1.3911	4.18e-26	1.73e-23	NM_001381901.1	114601	Ehbp1l1	transcript	4.4844	0	Inf	0.000820671	0.0276354
mmu-miR-200b-3p	90.9629	28.7971	1.6296	1.15e-10	1.59e-08	XM_036162252.1	27103	Eif2ak4	transcript	0.896072	0.017858	5.64897	0.000712386	0.0276354
mmu-miR-467a-5p	101.062	157.027	-0.63987	0.0013446	0.026507	XM_036162252.1	27103	Eif2ak4	transcript	0.896072	0.017858	5.64897	0.000712386	0.0276354
mmu-miR-874-3p	67.1603	160.155	-1.1385	0.0024216	0.042104	NM_025829.4	66892	Eif4e3	transcript	8.06038	15.9332	-0.98312	2.78e-05	0.0155632
mmu-miR-466i-5p	352.593	42.1158	2.344	5.49e-05	0.00284	NM_025829.4	66892	Eif4e3	transcript	8.06038	15.9332	-0.98312	2.78e-05	0.0155632
mmu-miR-365-1-5p	42.0397	9.35359	1.749	0.00085832	0.022209	NM_025829.4	66892	Eif4e3	transcript	8.06038	15.9332	-0.98312	2.78e-05	0.0155632
mmu-miR-467b-5p	101.062	157.027	-0.63987	0.0013446	0.026507	NM_025829.4	66892	Eif4e3	transcript	8.06038	15.9332	-0.98312	2.78e-05	0.0155632
mmu-miR-193b-3p	657.266	247.533	1.3911	4.18e-26	1.73e-23	NM_025829.4	66892	Eif4e3	transcript	8.06038	15.9332	-0.98312	2.78e-05	0.0155632
mmu-miR-221-3p	2269.82	1235.67	0.8571	8.52e-05	0.0035266	NM_025829.4	66892	Eif4e3	transcript	8.06038	15.9332	-0.98312	2.78e-05	0.0155632
mmu-miR-365-2-5p	8.11913	1.17918	1.9254	0.0018939	0.035639	NM_025829.4	66892	Eif4e3	transcript	8.06038	15.9332	-0.98312	2.78e-05	0.0155632
mmu-miR-146a-5p	1144.77	2572.83	-1.0815	0.0024408	0.042104	TCONS_00010934	13690	Eif4g2	transcript	0.834769	0	Inf	0.000820671	0.0276354
mmu-miR-200b-3p	90.9629	28.7971	1.6296	1.15e-10	1.59e-08	XM_006516544.4	140580	Elmo1	transcript	0.964251	0	Inf	0.000820671	0.0276354
mmu-miR-466i-5p	352.593	42.1158	2.344	5.49e-05	0.00284	XM_006516544.4	140580	Elmo1	transcript	0.964251	0	Inf	0.000820671	0.0276354
mmu-miR-214-3p	866.854	544.158	0.66229	0.00013468	0.0046466	XM_006516544.4	140580	Elmo1	transcript	0.964251	0	Inf	0.000820671	0.0276354
mmu-miR-1983	29.9641	89.2893	-1.379	0.00016096	0.0051261	XM_006516544.4	140580	Elmo1	transcript	0.964251	0	Inf	0.000820671	0.0276354
mmu-miR-221-3p	2269.82	1235.67	0.8571	8.52e-05	0.0035266	XM_006516544.4	140580	Elmo1	transcript	0.964251	0	Inf	0.000820671	0.0276354
mmu-miR-200a-3p	143.74	23.9782	1.9969	0.00056829	0.015685	XM_006516544.4	140580	Elmo1	transcript	0.964251	0	Inf	0.000820671	0.0276354
mmu-miR-208a-3p	19.6731	144.716	-2.1853	0.00010883	0.0040958	XM_006516544.4	140580	Elmo1	transcript	0.964251	0	Inf	0.000820671	0.0276354
mmu-miR-874-3p	67.1603	160.155	-1.1385	0.0024216	0.042104	TCONS_00017675	68519	Eml1	transcript	11.0496	10.9045	0.0190772	0.00239943	0.0465183
mmu-miR-365-1-5p	42.0397	9.35359	1.749	0.00085832	0.022209	TCONS_00017675	68519	Eml1	transcript	11.0496	10.9045	0.0190772	0.00239943	0.0465183
mmu-miR-29b-2-5p	32.6134	115.312	-1.5205	0.0011706	0.026507	TCONS_00017675	68519	Eml1	transcript	11.0496	10.9045	0.0190772	0.00239943	0.0465183
mmu-miR-214-3p	866.854	544.158	0.66229	0.00013468	0.0046466	TCONS_00017675	68519	Eml1	transcript	11.0496	10.9045	0.0190772	0.00239943	0.0465183
mmu-miR-365-2-5p	8.11913	1.17918	1.9254	0.0018939	0.035639	TCONS_00017675	68519	Eml1	transcript	11.0496	10.9045	0.0190772	0.00239943	0.0465183
mmu-miR-874-3p	67.1603	160.155	-1.1385	0.0024216	0.042104	XM_017317778.3	100502841	Epg5	transcript	0.826306	0.00611767	7.07755	0.000717464	0.0276354
mmu-miR-466i-5p	352.593	42.1158	2.344	5.49e-05	0.00284	XM_017317778.3	100502841	Epg5	transcript	0.826306	0.00611767	7.07755	0.000717464	0.0276354
mmu-miR-467b-5p	101.062	157.027	-0.63987	0.0013446	0.026507	XM_017317778.3	100502841	Epg5	transcript	0.826306	0.00611767	7.07755	0.000717464	0.0276354
mmu-miR-200b-3p	90.9629	28.7971	1.6296	1.15e-10	1.59e-08	TCONS_00019782	50527	Ero1a	transcript	1.12978	0	Inf	0.000820671	0.0276354
mmu-miR-466i-5p	352.593	42.1158	2.344	5.49e-05	0.00284	TCONS_00019782	50527	Ero1a	transcript	1.12978	0	Inf	0.000820671	0.0276354
mmu-miR-214-3p	866.854	544.158	0.66229	0.00013468	0.0046466	TCONS_00019782	50527	Ero1a	transcript	1.12978	0	Inf	0.000820671	0.0276354
mmu-miR-221-3p	2269.82	1235.67	0.8571	8.52e-05	0.0035266	TCONS_00019782	50527	Ero1a	transcript	1.12978	0	Inf	0.000820671	0.0276354
mmu-miR-200a-3p	143.74	23.9782	1.9969	0.00056829	0.015685	TCONS_00019782	50527	Ero1a	transcript	1.12978	0	Inf	0.000820671	0.0276354
mmu-miR-3470b	336.04	56.7948	2.1526	1.98e-05	0.0013662	TCONS_00019782	50527	Ero1a	transcript	1.12978	0	Inf	0.000820671	0.0276354
mmu-miR-466i-5p	352.593	42.1158	2.344	5.49e-05	0.00284	NM_019578.2	56219	Extl1	transcript	2.37027	5.2952	-1.15963	0.00266879	0.0492416
mmu-miR-874-3p	67.1603	160.155	-1.1385	0.0024216	0.042104	XM_006517452.5	76577	Faf2	transcript	0.845375	0	Inf	0.000820671	0.0276354
mmu-miR-29b-2-5p	32.6134	115.312	-1.5205	0.0011706	0.026507	XM_006517452.5	76577	Faf2	transcript	0.845375	0	Inf	0.000820671	0.0276354
mmu-miR-214-3p	866.854	544.158	0.66229	0.00013468	0.0046466	XM_006517452.5	76577	Faf2	transcript	0.845375	0	Inf	0.000820671	0.0276354
mmu-miR-193b-3p	657.266	247.533	1.3911	4.18e-26	1.73e-23	XM_006517452.5	76577	Faf2	transcript	0.845375	0	Inf	0.000820671	0.0276354
mmu-miR-3470b	336.04	56.7948	2.1526	1.98e-05	0.0013662	XM_006517452.5	76577	Faf2	transcript	0.845375	0	Inf	0.000820671	0.0276354
mmu-miR-874-3p	67.1603	160.155	-1.1385	0.0024216	0.042104	TCONS_00006799	68303	Fam114a1	transcript	0.995193	0	Inf	0.000820671	0.0276354
mmu-miR-466i-5p	352.593	42.1158	2.344	5.49e-05	0.00284	TCONS_00006799	68303	Fam114a1	transcript	0.995193	0	Inf	0.000820671	0.0276354
mmu-miR-466i-5p	352.593	42.1158	2.344	5.49e-05	0.00284	NM_133778.2	78408	Fam131a	transcript	1.39379	7.42655	-2.41368	0.000395429	0.0276354
mmu-miR-466i-5p	352.593	42.1158	2.344	5.49e-05	0.00284	NM_153794.4	108654	Fam210a	transcript	5.80425	4.32633	0.423966	0.000651079	0.0276354
mmu-miR-214-3p	866.854	544.158	0.66229	0.00013468	0.0046466	NM_153794.4	108654	Fam210a	transcript	5.80425	4.32633	0.423966	0.000651079	0.0276354
mmu-miR-208a-5p	1.68468	98.5205	-4.8306	5.8e-20	1.2e-17	NM_153794.4	108654	Fam210a	transcript	5.80425	4.32633	0.423966	0.000651079	0.0276354
mmu-miR-193b-3p	657.266	247.533	1.3911	4.18e-26	1.73e-23	NM_153794.4	108654	Fam210a	transcript	5.80425	4.32633	0.423966	0.000651079	0.0276354
mmu-miR-214-5p	271.213	165.169	0.69303	6.26e-05	0.0028804	NM_153794.4	108654	Fam210a	transcript	5.80425	4.32633	0.423966	0.000651079	0.0276354
mmu-miR-1983	29.9641	89.2893	-1.379	0.00016096	0.0051261	NM_153794.4	108654	Fam210a	transcript	5.80425	4.32633	0.423966	0.000651079	0.0276354
mmu-miR-200a-3p	143.74	23.9782	1.9969	0.00056829	0.015685	NM_153794.4	108654	Fam210a	transcript	5.80425	4.32633	0.423966	0.000651079	0.0276354
mmu-miR-3470b	336.04	56.7948	2.1526	1.98e-05	0.0013662	NM_153794.4	108654	Fam210a	transcript	5.80425	4.32633	0.423966	0.000651079	0.0276354
mmu-miR-146a-5p	1144.77	2572.83	-1.0815	0.0024408	0.042104	NM_153794.4	108654	Fam210a	transcript	5.80425	4.32633	0.423966	0.000651079	0.0276354
mmu-miR-466i-5p	352.593	42.1158	2.344	5.49e-05	0.00284	XM_030247404.1	69955	Fars2	transcript	5.98144	0	Inf	0.00240543	0.0465562
mmu-miR-208a-5p	1.68468	98.5205	-4.8306	5.8e-20	1.2e-17	XM_030247404.1	69955	Fars2	transcript	5.98144	0	Inf	0.00240543	0.0465562
mmu-miR-3470b	336.04	56.7948	2.1526	1.98e-05	0.0013662	XM_030247404.1	69955	Fars2	transcript	5.98144	0	Inf	0.00240543	0.0465562
mmu-miR-467a-5p	101.062	157.027	-0.63987	0.0013446	0.026507	XM_030247404.1	69955	Fars2	transcript	5.98144	0	Inf	0.00240543	0.0465562
mmu-miR-466i-5p	352.593	42.1158	2.344	5.49e-05	0.00284	XM_006539214.4	74202	Fblim1	transcript	1.7187	28.9022	-4.07179	0.000268232	0.0276354
mmu-miR-214-5p	271.213	165.169	0.69303	6.26e-05	0.0028804	XM_006539214.4	74202	Fblim1	transcript	1.7187	28.9022	-4.07179	0.000268232	0.0276354
mmu-miR-466i-5p	352.593	42.1158	2.344	5.49e-05	0.00284	TCONS_00005890	269529	Fbxo10	transcript	1.65025	0.00583533	8.14365	0.000642378	0.0276354
mmu-miR-467b-5p	101.062	157.027	-0.63987	0.0013446	0.026507	TCONS_00005890	269529	Fbxo10	transcript	1.65025	0.00583533	8.14365	0.000642378	0.0276354
mmu-miR-208a-5p	1.68468	98.5205	-4.8306	5.8e-20	1.2e-17	TCONS_00005890	269529	Fbxo10	transcript	1.65025	0.00583533	8.14365	0.000642378	0.0276354
mmu-miR-214-5p	271.213	165.169	0.69303	6.26e-05	0.0028804	TCONS_00005890	269529	Fbxo10	transcript	1.65025	0.00583533	8.14365	0.000642378	0.0276354
mmu-miR-146a-5p	1144.77	2572.83	-1.0815	0.0024408	0.042104	TCONS_00005890	269529	Fbxo10	transcript	1.65025	0.00583533	8.14365	0.000642378	0.0276354
mmu-miR-467a-5p	101.062	157.027	-0.63987	0.0013446	0.026507	TCONS_00005890	269529	Fbxo10	transcript	1.65025	0.00583533	8.14365	0.000642378	0.0276354
mmu-miR-690	1195.04	385.602	1.4425	0.0010865	0.02646	NM_001301728.1	14148	Fdx1	transcript	2.88784	4.69666	-0.701643	0.00098469	0.0299274
mmu-miR-1983	29.9641	89.2893	-1.379	0.00016096	0.0051261	NM_010193.4	14155	Fem1b	transcript	5.13072	4.11311	0.318931	0.00152468	0.0367326
mmu-miR-690	1195.04	385.602	1.4425	0.0010865	0.02646	NM_008013.4	14190	Fgl2	transcript	16.4985	4.37503	1.91497	0.000255543	0.0276354
mmu-miR-208a-5p	1.68468	98.5205	-4.8306	5.8e-20	1.2e-17	NM_008013.4	14190	Fgl2	transcript	16.4985	4.37503	1.91497	0.000255543	0.0276354
mmu-miR-1983	29.9641	89.2893	-1.379	0.00016096	0.0051261	NM_008013.4	14190	Fgl2	transcript	16.4985	4.37503	1.91497	0.000255543	0.0276354
mmu-miR-221-3p	2269.82	1235.67	0.8571	8.52e-05	0.0035266	NM_008013.4	14190	Fgl2	transcript	16.4985	4.37503	1.91497	0.000255543	0.0276354
mmu-miR-146a-5p	1144.77	2572.83	-1.0815	0.0024408	0.042104	NM_008013.4	14190	Fgl2	transcript	16.4985	4.37503	1.91497	0.000255543	0.0276354
novel_1	13879.1	1929.61	2.0063	0.0013125	0.026507	NM_008027.2	14251	Flot1	transcript	69.1708	45.4403	0.606189	0.000840947	0.0279088
mmu-miR-214-3p	866.854	544.158	0.66229	0.00013468	0.0046466	NM_145447.2	217721	Flvcr2	transcript	2.72949	0.849176	1.6845	0.00015539	0.0276354
mmu-miR-200a-3p	143.74	23.9782	1.9969	0.00056829	0.015685	NM_145447.2	217721	Flvcr2	transcript	2.72949	0.849176	1.6845	0.00015539	0.0276354
mmu-miR-874-3p	67.1603	160.155	-1.1385	0.0024216	0.042104	NM_177059.3	320027	Fstl4	transcript	2.66003	0	Inf	0.00041668	0.0276354
mmu-miR-466i-5p	352.593	42.1158	2.344	5.49e-05	0.00284	NM_177059.3	320027	Fstl4	transcript	2.66003	0	Inf	0.00041668	0.0276354
mmu-miR-214-3p	866.854	544.158	0.66229	0.00013468	0.0046466	NM_177059.3	320027	Fstl4	transcript	2.66003	0	Inf	0.00041668	0.0276354
mmu-miR-466i-5p	352.593	42.1158	2.344	5.49e-05	0.00284	TCONS_00013940	17281	Fyco1	transcript	4.89149	0	Inf	0.000820671	0.0276354
mmu-miR-214-5p	271.213	165.169	0.69303	6.26e-05	0.0028804	TCONS_00013940	17281	Fyco1	transcript	4.89149	0	Inf	0.000820671	0.0276354
mmu-miR-3470b	336.04	56.7948	2.1526	1.98e-05	0.0013662	TCONS_00013940	17281	Fyco1	transcript	4.89149	0	Inf	0.000820671	0.0276354
mmu-miR-365-1-5p	42.0397	9.35359	1.749	0.00085832	0.022209	XM_036162479.1	66691	Gapvd1	transcript	0.923883	0.00617833	7.22435	0.00246229	0.0472596
mmu-miR-214-3p	866.854	544.158	0.66229	0.00013468	0.0046466	XM_036162479.1	66691	Gapvd1	transcript	0.923883	0.00617833	7.22435	0.00246229	0.0472596
mmu-miR-221-3p	2269.82	1235.67	0.8571	8.52e-05	0.0035266	XM_036162479.1	66691	Gapvd1	transcript	0.923883	0.00617833	7.22435	0.00246229	0.0472596
mmu-miR-365-2-5p	8.11913	1.17918	1.9254	0.0018939	0.035639	XM_036162479.1	66691	Gapvd1	transcript	0.923883	0.00617833	7.22435	0.00246229	0.0472596
mmu-miR-200a-3p	143.74	23.9782	1.9969	0.00056829	0.015685	NM_010258.3	14465	Gata6	transcript	26.6683	14.4764	0.881428	0.00174486	0.0385677
mmu-miR-200a-3p	143.74	23.9782	1.9969	0.00056829	0.015685	NM_028803.4	74185	Gbe1	transcript	10.6125	11.9784	-0.174665	0.00182532	0.0398113
mmu-miR-1195	19.6113	1.98363	2.212	0.0004848	0.014336	NM_028803.4	74185	Gbe1	transcript	10.6125	11.9784	-0.174665	0.00182532	0.0398113
mmu-miR-214-3p	866.854	544.158	0.66229	0.00013468	0.0046466	NM_138591.2	28030	Gfm1	transcript	34.2978	39.8161	-0.215235	0.00123449	0.0335637
mmu-miR-214-3p	866.854	544.158	0.66229	0.00013468	0.0046466	NM_145929.2	106039	Gga1	transcript	10.8709	8.79062	0.306438	0.0015586	0.0372453
mmu-miR-146a-5p	1144.77	2572.83	-1.0815	0.0024408	0.042104	NM_145929.2	106039	Gga1	transcript	10.8709	8.79062	0.306438	0.0015586	0.0372453
mmu-miR-214-3p	866.854	544.158	0.66229	0.00013468	0.0046466	NM_008138.5	14678	Gnai2	transcript	64.7581	38.7376	0.741328	0.000133889	0.0276354
mmu-miR-221-3p	2269.82	1235.67	0.8571	8.52e-05	0.0035266	NM_008138.5	14678	Gnai2	transcript	64.7581	38.7376	0.741328	0.000133889	0.0276354
mmu-miR-200b-3p	90.9629	28.7971	1.6296	1.15e-10	1.59e-08	NM_010318.2	14707	Gng5	transcript	54.0706	68.9688	-0.351099	0.000246615	0.0276354
mmu-miR-466i-5p	352.593	42.1158	2.344	5.49e-05	0.00284	NM_010318.2	14707	Gng5	transcript	54.0706	68.9688	-0.351099	0.000246615	0.0276354
mmu-miR-208a-5p	1.68468	98.5205	-4.8306	5.8e-20	1.2e-17	NM_010318.2	14707	Gng5	transcript	54.0706	68.9688	-0.351099	0.000246615	0.0276354
mmu-miR-200a-3p	143.74	23.9782	1.9969	0.00056829	0.015685	NM_010318.2	14707	Gng5	transcript	54.0706	68.9688	-0.351099	0.000246615	0.0276354
mmu-miR-3470b	336.04	56.7948	2.1526	1.98e-05	0.0013662	NM_010318.2	14707	Gng5	transcript	54.0706	68.9688	-0.351099	0.000246615	0.0276354
mmu-miR-874-3p	67.1603	160.155	-1.1385	0.0024216	0.042104	NM_018743.4	102247	Gpat4	transcript	7.76624	6.97285	0.155467	0.00132739	0.0345061
mmu-miR-365-1-5p	42.0397	9.35359	1.749	0.00085832	0.022209	NM_018743.4	102247	Gpat4	transcript	7.76624	6.97285	0.155467	0.00132739	0.0345061
mmu-miR-214-3p	866.854	544.158	0.66229	0.00013468	0.0046466	NM_018743.4	102247	Gpat4	transcript	7.76624	6.97285	0.155467	0.00132739	0.0345061
mmu-miR-208a-5p	1.68468	98.5205	-4.8306	5.8e-20	1.2e-17	NM_018743.4	102247	Gpat4	transcript	7.76624	6.97285	0.155467	0.00132739	0.0345061
mmu-miR-193b-3p	657.266	247.533	1.3911	4.18e-26	1.73e-23	NM_018743.4	102247	Gpat4	transcript	7.76624	6.97285	0.155467	0.00132739	0.0345061
mmu-miR-214-5p	271.213	165.169	0.69303	6.26e-05	0.0028804	NM_018743.4	102247	Gpat4	transcript	7.76624	6.97285	0.155467	0.00132739	0.0345061
mmu-miR-365-2-5p	8.11913	1.17918	1.9254	0.0018939	0.035639	NM_018743.4	102247	Gpat4	transcript	7.76624	6.97285	0.155467	0.00132739	0.0345061
mmu-miR-467a-5p	101.062	157.027	-0.63987	0.0013446	0.026507	NM_018743.4	102247	Gpat4	transcript	7.76624	6.97285	0.155467	0.00132739	0.0345061
mmu-miR-29b-2-5p	32.6134	115.312	-1.5205	0.0011706	0.026507	NM_001355651.1	74182	Gpcpd1	transcript	1.98661	0.186929	3.40975	0.00197354	0.041549
mmu-miR-690	1195.04	385.602	1.4425	0.0010865	0.02646	NM_001355651.1	74182	Gpcpd1	transcript	1.98661	0.186929	3.40975	0.00197354	0.041549
mmu-miR-214-3p	866.854	544.158	0.66229	0.00013468	0.0046466	NM_001355651.1	74182	Gpcpd1	transcript	1.98661	0.186929	3.40975	0.00197354	0.041549
mmu-miR-208a-5p	1.68468	98.5205	-4.8306	5.8e-20	1.2e-17	NM_001355651.1	74182	Gpcpd1	transcript	1.98661	0.186929	3.40975	0.00197354	0.041549
mmu-miR-214-5p	271.213	165.169	0.69303	6.26e-05	0.0028804	NM_001355651.1	74182	Gpcpd1	transcript	1.98661	0.186929	3.40975	0.00197354	0.041549
mmu-miR-200a-3p	143.74	23.9782	1.9969	0.00056829	0.015685	NM_001355651.1	74182	Gpcpd1	transcript	1.98661	0.186929	3.40975	0.00197354	0.041549
mmu-miR-3470b	336.04	56.7948	2.1526	1.98e-05	0.0013662	NM_001355651.1	74182	Gpcpd1	transcript	1.98661	0.186929	3.40975	0.00197354	0.041549
mmu-miR-1195	19.6113	1.98363	2.212	0.0004848	0.014336	NM_001355651.1	74182	Gpcpd1	transcript	1.98661	0.186929	3.40975	0.00197354	0.041549
mmu-miR-874-3p	67.1603	160.155	-1.1385	0.0024216	0.042104	NM_173866.4	108682	Gpt2	transcript	1.46859	5.47079	-1.89731	0.000818569	0.0276354
mmu-miR-466i-5p	352.593	42.1158	2.344	5.49e-05	0.00284	NM_173866.4	108682	Gpt2	transcript	1.46859	5.47079	-1.89731	0.000818569	0.0276354
mmu-miR-365-1-5p	42.0397	9.35359	1.749	0.00085832	0.022209	NM_173866.4	108682	Gpt2	transcript	1.46859	5.47079	-1.89731	0.000818569	0.0276354
mmu-miR-29b-2-5p	32.6134	115.312	-1.5205	0.0011706	0.026507	NM_173866.4	108682	Gpt2	transcript	1.46859	5.47079	-1.89731	0.000818569	0.0276354
mmu-miR-690	1195.04	385.602	1.4425	0.0010865	0.02646	NM_173866.4	108682	Gpt2	transcript	1.46859	5.47079	-1.89731	0.000818569	0.0276354
mmu-miR-467b-5p	101.062	157.027	-0.63987	0.0013446	0.026507	NM_173866.4	108682	Gpt2	transcript	1.46859	5.47079	-1.89731	0.000818569	0.0276354
mmu-miR-208a-5p	1.68468	98.5205	-4.8306	5.8e-20	1.2e-17	NM_173866.4	108682	Gpt2	transcript	1.46859	5.47079	-1.89731	0.000818569	0.0276354
mmu-miR-214-5p	271.213	165.169	0.69303	6.26e-05	0.0028804	NM_173866.4	108682	Gpt2	transcript	1.46859	5.47079	-1.89731	0.000818569	0.0276354
mmu-miR-221-3p	2269.82	1235.67	0.8571	8.52e-05	0.0035266	NM_173866.4	108682	Gpt2	transcript	1.46859	5.47079	-1.89731	0.000818569	0.0276354
mmu-miR-200a-3p	143.74	23.9782	1.9969	0.00056829	0.015685	NM_173866.4	108682	Gpt2	transcript	1.46859	5.47079	-1.89731	0.000818569	0.0276354
mmu-miR-3470b	336.04	56.7948	2.1526	1.98e-05	0.0013662	NM_173866.4	108682	Gpt2	transcript	1.46859	5.47079	-1.89731	0.000818569	0.0276354
mmu-miR-146a-5p	1144.77	2572.83	-1.0815	0.0024408	0.042104	NM_173866.4	108682	Gpt2	transcript	1.46859	5.47079	-1.89731	0.000818569	0.0276354
mmu-miR-365-2-5p	8.11913	1.17918	1.9254	0.0018939	0.035639	NM_173866.4	108682	Gpt2	transcript	1.46859	5.47079	-1.89731	0.000818569	0.0276354
mmu-miR-467a-5p	101.062	157.027	-0.63987	0.0013446	0.026507	NM_173866.4	108682	Gpt2	transcript	1.46859	5.47079	-1.89731	0.000818569	0.0276354
mmu-miR-874-3p	67.1603	160.155	-1.1385	0.0024216	0.042104	XM_036161439.1	14773	Grk5	transcript	3.29743	0	Inf	0.000145308	0.0276354
mmu-miR-466i-5p	352.593	42.1158	2.344	5.49e-05	0.00284	XM_036161439.1	14773	Grk5	transcript	3.29743	0	Inf	0.000145308	0.0276354
mmu-miR-214-5p	271.213	165.169	0.69303	6.26e-05	0.0028804	XM_036161439.1	14773	Grk5	transcript	3.29743	0	Inf	0.000145308	0.0276354
mmu-miR-874-3p	67.1603	160.155	-1.1385	0.0024216	0.042104	TCONS_00021414	56637	Gsk3b	transcript	3.22604	0	Inf	0.000820671	0.0276354
mmu-miR-29b-2-5p	32.6134	115.312	-1.5205	0.0011706	0.026507	TCONS_00021414	56637	Gsk3b	transcript	3.22604	0	Inf	0.000820671	0.0276354
mmu-miR-690	1195.04	385.602	1.4425	0.0010865	0.02646	TCONS_00021414	56637	Gsk3b	transcript	3.22604	0	Inf	0.000820671	0.0276354
mmu-miR-467b-5p	101.062	157.027	-0.63987	0.0013446	0.026507	TCONS_00021414	56637	Gsk3b	transcript	3.22604	0	Inf	0.000820671	0.0276354
mmu-miR-208a-5p	1.68468	98.5205	-4.8306	5.8e-20	1.2e-17	TCONS_00021414	56637	Gsk3b	transcript	3.22604	0	Inf	0.000820671	0.0276354
mmu-miR-193b-3p	657.266	247.533	1.3911	4.18e-26	1.73e-23	NM_010436.2	15270	H2ax	transcript	2.32941	3.22153	-0.467779	0.000765612	0.0276354
mmu-miR-5126	30.4974	5.65546	2.0107	5.18e-05	0.00284	NM_008226.2	15166	Hcn2	transcript	0.545519	4.3639	-2.99992	0.000415767	0.0276354
mmu-miR-6538	304.502	74.5948	1.8593	7.2e-07	7.45e-05	NM_008226.2	15166	Hcn2	transcript	0.545519	4.3639	-2.99992	0.000415767	0.0276354
mmu-miR-214-3p	866.854	544.158	0.66229	0.00013468	0.0046466	NM_133808.5	110611	Hdlbp	transcript	60.027	71.0376	-0.242973	0.00219802	0.0438821
mmu-miR-193b-3p	657.266	247.533	1.3911	4.18e-26	1.73e-23	NM_133808.5	110611	Hdlbp	transcript	60.027	71.0376	-0.242973	0.00219802	0.0438821
mmu-miR-214-5p	271.213	165.169	0.69303	6.26e-05	0.0028804	NM_133808.5	110611	Hdlbp	transcript	60.027	71.0376	-0.242973	0.00219802	0.0438821
mmu-miR-466i-5p	352.593	42.1158	2.344	5.49e-05	0.00284	NM_001136066.2	15369	Hmox2	transcript	7.45295	0.080383	6.53478	0.00191538	0.0409992
mmu-miR-1983	29.9641	89.2893	-1.379	0.00016096	0.0051261	NM_001136066.2	15369	Hmox2	transcript	7.45295	0.080383	6.53478	0.00191538	0.0409992
mmu-miR-467b-5p	101.062	157.027	-0.63987	0.0013446	0.026507	NM_001360789.1	232989	Hnrnpul1	transcript	2.02566	0.000311667	12.6661	0.000818354	0.0276354
mmu-miR-221-3p	2269.82	1235.67	0.8571	8.52e-05	0.0035266	NM_001360789.1	232989	Hnrnpul1	transcript	2.02566	0.000311667	12.6661	0.000818354	0.0276354
mmu-miR-214-3p	866.854	544.158	0.66229	0.00013468	0.0046466	XM_036158471.1	15460	Hr	transcript	0	2.40576	#NAME?	0.0021495	0.0436572
novel_1	13879.1	1929.61	2.0063	0.0013125	0.026507	NM_019564.3	56213	Htra1	transcript	13.9899	19.6904	-0.493106	0.000638183	0.0276354
mmu-miR-200b-3p	90.9629	28.7971	1.6296	1.15e-10	1.59e-08	NM_010489.2	15587	Hyal2	transcript	3.40604	0.443805	2.94009	0.00142619	0.0355126
mmu-miR-214-3p	866.854	544.158	0.66229	0.00013468	0.0046466	NM_010489.2	15587	Hyal2	transcript	3.40604	0.443805	2.94009	0.00142619	0.0355126
novel_1	13879.1	1929.61	2.0063	0.0013125	0.026507	NM_010489.2	15587	Hyal2	transcript	3.40604	0.443805	2.94009	0.00142619	0.0355126
mmu-miR-208a-5p	1.68468	98.5205	-4.8306	5.8e-20	1.2e-17	NM_173011.2	269951	Idh2	transcript	1059.92	467.967	1.17947	0.000172488	0.0276354
mmu-miR-200a-3p	143.74	23.9782	1.9969	0.00056829	0.015685	NM_173011.2	269951	Idh2	transcript	1059.92	467.967	1.17947	0.000172488	0.0276354
mmu-miR-690	1195.04	385.602	1.4425	0.0010865	0.02646	NM_029573.2	67834	Idh3a	transcript	102.21	117.679	-0.203314	0.000977083	0.0298464
mmu-miR-214-3p	866.854	544.158	0.66229	0.00013468	0.0046466	NM_029573.2	67834	Idh3a	transcript	102.21	117.679	-0.203314	0.000977083	0.0298464
mmu-miR-1983	29.9641	89.2893	-1.379	0.00016096	0.0051261	NM_029573.2	67834	Idh3a	transcript	102.21	117.679	-0.203314	0.000977083	0.0298464
mmu-miR-208a-5p	1.68468	98.5205	-4.8306	5.8e-20	1.2e-17	TCONS_00025464	15931	Ids	transcript	2.24875	0	Inf	0.000820671	0.0276354
mmu-miR-200a-3p	143.74	23.9782	1.9969	0.00056829	0.015685	TCONS_00025464	15931	Ids	transcript	2.24875	0	Inf	0.000820671	0.0276354
mmu-miR-3470b	336.04	56.7948	2.1526	1.98e-05	0.0013662	TCONS_00025464	15931	Ids	transcript	2.24875	0	Inf	0.000820671	0.0276354
mmu-miR-874-3p	67.1603	160.155	-1.1385	0.0024216	0.042104	NM_008338.4	15980	Ifngr2	transcript	40.1831	60.2437	-0.584221	7.98e-05	0.0253471
mmu-miR-466i-5p	352.593	42.1158	2.344	5.49e-05	0.00284	NM_008338.4	15980	Ifngr2	transcript	40.1831	60.2437	-0.584221	7.98e-05	0.0253471
mmu-miR-214-3p	866.854	544.158	0.66229	0.00013468	0.0046466	NM_008338.4	15980	Ifngr2	transcript	40.1831	60.2437	-0.584221	7.98e-05	0.0253471
mmu-miR-193b-3p	657.266	247.533	1.3911	4.18e-26	1.73e-23	NM_008338.4	15980	Ifngr2	transcript	40.1831	60.2437	-0.584221	7.98e-05	0.0253471
mmu-miR-200a-3p	143.74	23.9782	1.9969	0.00056829	0.015685	NM_008338.4	15980	Ifngr2	transcript	40.1831	60.2437	-0.584221	7.98e-05	0.0253471
mmu-miR-467a-5p	101.062	157.027	-0.63987	0.0013446	0.026507	NM_008338.4	15980	Ifngr2	transcript	40.1831	60.2437	-0.584221	7.98e-05	0.0253471
mmu-miR-466i-5p	352.593	42.1158	2.344	5.49e-05	0.00284	NM_008343.2	16009	Igfbp3	transcript	13.9638	3.20116	2.12502	0.00190829	0.0409992
mmu-miR-214-5p	271.213	165.169	0.69303	6.26e-05	0.0028804	NM_010549.3	16157	Il11ra1	transcript	3.03172	0.0423287	6.16236	0.00113857	0.0321367
mmu-miR-146a-5p	1144.77	2572.83	-1.0815	0.0024408	0.042104	NM_010549.3	16157	Il11ra1	transcript	3.03172	0.0423287	6.16236	0.00113857	0.0321367
mmu-miR-200b-3p	90.9629	28.7971	1.6296	1.15e-10	1.59e-08	NM_175398.4	109050	Inka2	transcript	2.56575	7.08752	-1.4659	0.00255544	0.0482407
mmu-miR-874-3p	67.1603	160.155	-1.1385	0.0024216	0.042104	NM_175398.4	109050	Inka2	transcript	2.56575	7.08752	-1.4659	0.00255544	0.0482407
mmu-miR-466i-5p	352.593	42.1158	2.344	5.49e-05	0.00284	NM_175398.4	109050	Inka2	transcript	2.56575	7.08752	-1.4659	0.00255544	0.0482407
mmu-miR-214-3p	866.854	544.158	0.66229	0.00013468	0.0046466	NM_175398.4	109050	Inka2	transcript	2.56575	7.08752	-1.4659	0.00255544	0.0482407
mmu-miR-3470b	336.04	56.7948	2.1526	1.98e-05	0.0013662	NM_175398.4	109050	Inka2	transcript	2.56575	7.08752	-1.4659	0.00255544	0.0482407
mmu-miR-146a-5p	1144.77	2572.83	-1.0815	0.0024408	0.042104	NM_175398.4	109050	Inka2	transcript	2.56575	7.08752	-1.4659	0.00255544	0.0482407
mmu-miR-467a-5p	101.062	157.027	-0.63987	0.0013446	0.026507	NM_175398.4	109050	Inka2	transcript	2.56575	7.08752	-1.4659	0.00255544	0.0482407
mmu-miR-466i-5p	352.593	42.1158	2.344	5.49e-05	0.00284	TCONS_00011889	16337	Insr	transcript	3.80413	0	Inf	3.51e-05	0.0155632
mmu-miR-214-3p	866.854	544.158	0.66229	0.00013468	0.0046466	TCONS_00011889	16337	Insr	transcript	3.80413	0	Inf	3.51e-05	0.0155632
mmu-miR-1983	29.9641	89.2893	-1.379	0.00016096	0.0051261	TCONS_00011889	16337	Insr	transcript	3.80413	0	Inf	3.51e-05	0.0155632
mmu-miR-200b-3p	90.9629	28.7971	1.6296	1.15e-10	1.59e-08	TCONS_00003881	100505386	Iqschfp	transcript	26.0548	27.9618	-0.101907	0.000932545	0.0292165
mmu-miR-200a-3p	143.74	23.9782	1.9969	0.00056829	0.015685	TCONS_00003881	100505386	Iqschfp	transcript	26.0548	27.9618	-0.101907	0.000932545	0.0292165
mmu-miR-200a-3p	143.74	23.9782	1.9969	0.00056829	0.015685	TCONS_00023491	66307	Isoc1	transcript	2.30615	0	Inf	0.000820671	0.0276354
mmu-miR-146a-5p	1144.77	2572.83	-1.0815	0.0024408	0.042104	TCONS_00023491	66307	Isoc1	transcript	2.30615	0	Inf	0.000820671	0.0276354
mmu-miR-365-1-5p	42.0397	9.35359	1.749	0.00085832	0.022209	TCONS_00000691	320404	Itpkb	transcript	2.74831	0	Inf	0.00022582	0.0276354
mmu-miR-214-3p	866.854	544.158	0.66229	0.00013468	0.0046466	TCONS_00000691	320404	Itpkb	transcript	2.74831	0	Inf	0.00022582	0.0276354
mmu-miR-214-5p	271.213	165.169	0.69303	6.26e-05	0.0028804	TCONS_00000691	320404	Itpkb	transcript	2.74831	0	Inf	0.00022582	0.0276354
novel_1	13879.1	1929.61	2.0063	0.0013125	0.026507	TCONS_00000691	320404	Itpkb	transcript	2.74831	0	Inf	0.00022582	0.0276354
mmu-miR-365-2-5p	8.11913	1.17918	1.9254	0.0018939	0.035639	TCONS_00000691	320404	Itpkb	transcript	2.74831	0	Inf	0.00022582	0.0276354
mmu-miR-200b-3p	90.9629	28.7971	1.6296	1.15e-10	1.59e-08	TCONS_00008585	16438	Itpr1	transcript	4.18488	1.34599	1.63652	0.000654945	0.0276354
mmu-miR-467a-5p	101.062	157.027	-0.63987	0.0013446	0.026507	TCONS_00008585	16438	Itpr1	transcript	4.18488	1.34599	1.63652	0.000654945	0.0276354
mmu-miR-467a-5p	101.062	157.027	-0.63987	0.0013446	0.026507	NM_080558.4	70599	Itprid2	transcript	3.77207	4.99737	-0.405813	0.000195553	0.0276354
mmu-miR-466i-5p	352.593	42.1158	2.344	5.49e-05	0.00284	NM_001039512.1	117198	Ivns1abp	transcript	5.9554	0	Inf	0.000820671	0.0276354
mmu-miR-365-1-5p	42.0397	9.35359	1.749	0.00085832	0.022209	NM_001039512.1	117198	Ivns1abp	transcript	5.9554	0	Inf	0.000820671	0.0276354
mmu-miR-29b-2-5p	32.6134	115.312	-1.5205	0.0011706	0.026507	NM_001039512.1	117198	Ivns1abp	transcript	5.9554	0	Inf	0.000820671	0.0276354
mmu-miR-214-5p	271.213	165.169	0.69303	6.26e-05	0.0028804	NM_001039512.1	117198	Ivns1abp	transcript	5.9554	0	Inf	0.000820671	0.0276354
mmu-miR-6538	304.502	74.5948	1.8593	7.2e-07	7.45e-05	NM_001039512.1	117198	Ivns1abp	transcript	5.9554	0	Inf	0.000820671	0.0276354
mmu-miR-200a-3p	143.74	23.9782	1.9969	0.00056829	0.015685	NM_001039512.1	117198	Ivns1abp	transcript	5.9554	0	Inf	0.000820671	0.0276354
mmu-miR-3470b	336.04	56.7948	2.1526	1.98e-05	0.0013662	NM_001039512.1	117198	Ivns1abp	transcript	5.9554	0	Inf	0.000820671	0.0276354
mmu-miR-146a-5p	1144.77	2572.83	-1.0815	0.0024408	0.042104	NM_001039512.1	117198	Ivns1abp	transcript	5.9554	0	Inf	0.000820671	0.0276354
mmu-miR-365-2-5p	8.11913	1.17918	1.9254	0.0018939	0.035639	NM_001039512.1	117198	Ivns1abp	transcript	5.9554	0	Inf	0.000820671	0.0276354
mmu-miR-214-3p	866.854	544.158	0.66229	0.00013468	0.0046466	NM_008258.2	15374	Jpt1	transcript	29.7754	15.9326	0.90214	0.00268557	0.0494042
mmu-miR-3470b	336.04	56.7948	2.1526	1.98e-05	0.0013662	NM_008258.2	15374	Jpt1	transcript	29.7754	15.9326	0.90214	0.00268557	0.0494042
mmu-miR-3470b	336.04	56.7948	2.1526	1.98e-05	0.0013662	XM_030250691.1	107351	Kank1	transcript	0.855732	0	Inf	0.000781997	0.0276354
mmu-miR-146a-5p	1144.77	2572.83	-1.0815	0.0024408	0.042104	XM_030250691.1	107351	Kank1	transcript	0.855732	0	Inf	0.000781997	0.0276354
mmu-miR-466i-5p	352.593	42.1158	2.344	5.49e-05	0.00284	NM_001362456.1	16509	Kcne1	transcript	4.13095	0.493128	3.06644	0.000339807	0.0276354
mmu-miR-29b-2-5p	32.6134	115.312	-1.5205	0.0011706	0.026507	NM_001362456.1	16509	Kcne1	transcript	4.13095	0.493128	3.06644	0.000339807	0.0276354
mmu-miR-1983	29.9641	89.2893	-1.379	0.00016096	0.0051261	NM_001362456.1	16509	Kcne1	transcript	4.13095	0.493128	3.06644	0.000339807	0.0276354
mmu-miR-6538	304.502	74.5948	1.8593	7.2e-07	7.45e-05	TCONS_00023916	240444	Kcng2	transcript	1.03985	0	Inf	0.000820671	0.0276354
mmu-miR-365-1-5p	42.0397	9.35359	1.749	0.00085832	0.022209	XM_006540663.4	16514	Kcnj11	transcript	1.1616	0	Inf	0.000774626	0.0276354
mmu-miR-690	1195.04	385.602	1.4425	0.0010865	0.02646	XM_006540663.4	16514	Kcnj11	transcript	1.1616	0	Inf	0.000774626	0.0276354
mmu-miR-214-5p	271.213	165.169	0.69303	6.26e-05	0.0028804	XM_006540663.4	16514	Kcnj11	transcript	1.1616	0	Inf	0.000774626	0.0276354
mmu-miR-1983	29.9641	89.2893	-1.379	0.00016096	0.0051261	XM_006540663.4	16514	Kcnj11	transcript	1.1616	0	Inf	0.000774626	0.0276354
mmu-miR-365-2-5p	8.11913	1.17918	1.9254	0.0018939	0.035639	XM_006540663.4	16514	Kcnj11	transcript	1.1616	0	Inf	0.000774626	0.0276354
mmu-miR-193b-3p	657.266	247.533	1.3911	4.18e-26	1.73e-23	TCONS_00023091	16549	Khsrp	transcript	3.0906	0	Inf	0.000820671	0.0276354
mmu-miR-1983	29.9641	89.2893	-1.379	0.00016096	0.0051261	NM_178357.3	194655	Klf11	transcript	5.69257	2.84993	0.998154	0.00238736	0.0463624
mmu-miR-200a-3p	143.74	23.9782	1.9969	0.00056829	0.015685	NM_178357.3	194655	Klf11	transcript	5.69257	2.84993	0.998154	0.00238736	0.0463624
mmu-miR-3470b	336.04	56.7948	2.1526	1.98e-05	0.0013662	NM_178357.3	194655	Klf11	transcript	5.69257	2.84993	0.998154	0.00238736	0.0463624
mmu-miR-214-3p	866.854	544.158	0.66229	0.00013468	0.0046466	NM_178253.5	271005	Klhdc1	transcript	4.29811	8.4043	-0.967424	0.000211255	0.0276354
mmu-miR-874-3p	67.1603	160.155	-1.1385	0.0024216	0.042104	NM_145605.2	234825	Klhdc4	transcript	1.15389	3.19303	-1.46842	0.000484263	0.0276354
mmu-miR-214-3p	866.854	544.158	0.66229	0.00013468	0.0046466	NM_145605.2	234825	Klhdc4	transcript	1.15389	3.19303	-1.46842	0.000484263	0.0276354
mmu-miR-208a-5p	1.68468	98.5205	-4.8306	5.8e-20	1.2e-17	NM_145605.2	234825	Klhdc4	transcript	1.15389	3.19303	-1.46842	0.000484263	0.0276354
mmu-miR-1983	29.9641	89.2893	-1.379	0.00016096	0.0051261	NM_145605.2	234825	Klhdc4	transcript	1.15389	3.19303	-1.46842	0.000484263	0.0276354
mmu-miR-3470b	336.04	56.7948	2.1526	1.98e-05	0.0013662	NM_145605.2	234825	Klhdc4	transcript	1.15389	3.19303	-1.46842	0.000484263	0.0276354
mmu-miR-874-3p	67.1603	160.155	-1.1385	0.0024216	0.042104	XM_030244718.2	78267	Klhdc8b	transcript	0.935272	0.0147827	5.98341	0.00120816	0.0332056
mmu-miR-193b-3p	657.266	247.533	1.3911	4.18e-26	1.73e-23	XM_030244718.2	78267	Klhdc8b	transcript	0.935272	0.0147827	5.98341	0.00120816	0.0332056
mmu-miR-874-3p	67.1603	160.155	-1.1385	0.0024216	0.042104	NM_172925.2	244923	Klhl31	transcript	25.7365	28.473	-0.145783	0.00102428	0.0304533
mmu-miR-466i-5p	352.593	42.1158	2.344	5.49e-05	0.00284	NM_172925.2	244923	Klhl31	transcript	25.7365	28.473	-0.145783	0.00102428	0.0304533
mmu-miR-690	1195.04	385.602	1.4425	0.0010865	0.02646	NM_172925.2	244923	Klhl31	transcript	25.7365	28.473	-0.145783	0.00102428	0.0304533
mmu-miR-221-3p	2269.82	1235.67	0.8571	8.52e-05	0.0035266	NM_172925.2	244923	Klhl31	transcript	25.7365	28.473	-0.145783	0.00102428	0.0304533
mmu-miR-146a-5p	1144.77	2572.83	-1.0815	0.0024408	0.042104	NM_172925.2	244923	Klhl31	transcript	25.7365	28.473	-0.145783	0.00102428	0.0304533
mmu-miR-200b-3p	90.9629	28.7971	1.6296	1.15e-10	1.59e-08	NM_008467.4	16649	Kpna4	transcript	22.3532	21.9256	0.0278659	0.00161496	0.037419
mmu-miR-1983	29.9641	89.2893	-1.379	0.00016096	0.0051261	NM_008467.4	16649	Kpna4	transcript	22.3532	21.9256	0.0278659	0.00161496	0.037419
mmu-miR-200a-3p	143.74	23.9782	1.9969	0.00056829	0.015685	NM_008467.4	16649	Kpna4	transcript	22.3532	21.9256	0.0278659	0.00161496	0.037419
mmu-miR-466i-5p	352.593	42.1158	2.344	5.49e-05	0.00284	NM_021284.6	16653	Kras	transcript	6.68577	7.24422	-0.115735	0.000780807	0.0276354
mmu-miR-214-3p	866.854	544.158	0.66229	0.00013468	0.0046466	NM_021284.6	16653	Kras	transcript	6.68577	7.24422	-0.115735	0.000780807	0.0276354
mmu-miR-467b-5p	101.062	157.027	-0.63987	0.0013446	0.026507	NM_021284.6	16653	Kras	transcript	6.68577	7.24422	-0.115735	0.000780807	0.0276354
mmu-miR-208a-5p	1.68468	98.5205	-4.8306	5.8e-20	1.2e-17	NM_021284.6	16653	Kras	transcript	6.68577	7.24422	-0.115735	0.000780807	0.0276354
mmu-miR-193b-3p	657.266	247.533	1.3911	4.18e-26	1.73e-23	NM_021284.6	16653	Kras	transcript	6.68577	7.24422	-0.115735	0.000780807	0.0276354
mmu-miR-221-3p	2269.82	1235.67	0.8571	8.52e-05	0.0035266	NM_021284.6	16653	Kras	transcript	6.68577	7.24422	-0.115735	0.000780807	0.0276354
mmu-miR-146a-5p	1144.77	2572.83	-1.0815	0.0024408	0.042104	NM_021284.6	16653	Kras	transcript	6.68577	7.24422	-0.115735	0.000780807	0.0276354
mmu-miR-214-3p	866.854	544.158	0.66229	0.00013468	0.0046466	NM_133664.3	16763	Lad1	transcript	2.17237	0.171618	3.662	0.000206847	0.0276354
mmu-miR-208a-3p	19.6731	144.716	-2.1853	0.00010883	0.0040958	NM_133664.3	16763	Lad1	transcript	2.17237	0.171618	3.662	0.000206847	0.0276354
mmu-miR-365-1-5p	42.0397	9.35359	1.749	0.00085832	0.022209	NM_008484.2	16780	Lamb3	transcript	2.26838	0	Inf	2.5e-05	0.0155632
mmu-miR-365-2-5p	8.11913	1.17918	1.9254	0.0018939	0.035639	NM_008484.2	16780	Lamb3	transcript	2.26838	0	Inf	2.5e-05	0.0155632
mmu-miR-874-3p	67.1603	160.155	-1.1385	0.0024216	0.042104	NM_001113408.2	16825	Ldb1	transcript	7.39907	6.99442	0.0811388	9.29e-05	0.0264941
mmu-miR-466i-5p	352.593	42.1158	2.344	5.49e-05	0.00284	NM_001113408.2	16825	Ldb1	transcript	7.39907	6.99442	0.0811388	9.29e-05	0.0264941
mmu-miR-365-1-5p	42.0397	9.35359	1.749	0.00085832	0.022209	TCONS_00019765	24131	Ldb3	transcript	0.990866	0	Inf	0.000946662	0.0295441
mmu-miR-690	1195.04	385.602	1.4425	0.0010865	0.02646	TCONS_00019765	24131	Ldb3	transcript	0.990866	0	Inf	0.000946662	0.0295441
mmu-miR-208a-5p	1.68468	98.5205	-4.8306	5.8e-20	1.2e-17	TCONS_00019765	24131	Ldb3	transcript	0.990866	0	Inf	0.000946662	0.0295441
mmu-miR-1983	29.9641	89.2893	-1.379	0.00016096	0.0051261	TCONS_00019765	24131	Ldb3	transcript	0.990866	0	Inf	0.000946662	0.0295441
mmu-miR-200a-3p	143.74	23.9782	1.9969	0.00056829	0.015685	TCONS_00019765	24131	Ldb3	transcript	0.990866	0	Inf	0.000946662	0.0295441
mmu-miR-3470b	336.04	56.7948	2.1526	1.98e-05	0.0013662	TCONS_00019765	24131	Ldb3	transcript	0.990866	0	Inf	0.000946662	0.0295441
mmu-miR-365-2-5p	8.11913	1.17918	1.9254	0.0018939	0.035639	TCONS_00019765	24131	Ldb3	transcript	0.990866	0	Inf	0.000946662	0.0295441
mmu-miR-5126	30.4974	5.65546	2.0107	5.18e-05	0.00284	NM_019694.2	56384	Letm1	transcript	5.73717	11.2145	-0.966953	0.000238425	0.0276354
mmu-miR-874-3p	67.1603	160.155	-1.1385	0.0024216	0.042104	NM_019694.2	56384	Letm1	transcript	5.73717	11.2145	-0.966953	0.000238425	0.0276354
mmu-miR-365-1-5p	42.0397	9.35359	1.749	0.00085832	0.022209	NM_019694.2	56384	Letm1	transcript	5.73717	11.2145	-0.966953	0.000238425	0.0276354
mmu-miR-29b-2-5p	32.6134	115.312	-1.5205	0.0011706	0.026507	NM_019694.2	56384	Letm1	transcript	5.73717	11.2145	-0.966953	0.000238425	0.0276354
mmu-miR-690	1195.04	385.602	1.4425	0.0010865	0.02646	NM_019694.2	56384	Letm1	transcript	5.73717	11.2145	-0.966953	0.000238425	0.0276354
mmu-miR-214-3p	866.854	544.158	0.66229	0.00013468	0.0046466	NM_019694.2	56384	Letm1	transcript	5.73717	11.2145	-0.966953	0.000238425	0.0276354
mmu-miR-193b-3p	657.266	247.533	1.3911	4.18e-26	1.73e-23	NM_019694.2	56384	Letm1	transcript	5.73717	11.2145	-0.966953	0.000238425	0.0276354
mmu-miR-214-5p	271.213	165.169	0.69303	6.26e-05	0.0028804	NM_019694.2	56384	Letm1	transcript	5.73717	11.2145	-0.966953	0.000238425	0.0276354
mmu-miR-6538	304.502	74.5948	1.8593	7.2e-07	7.45e-05	NM_019694.2	56384	Letm1	transcript	5.73717	11.2145	-0.966953	0.000238425	0.0276354
mmu-miR-221-3p	2269.82	1235.67	0.8571	8.52e-05	0.0035266	NM_019694.2	56384	Letm1	transcript	5.73717	11.2145	-0.966953	0.000238425	0.0276354
mmu-miR-200a-3p	143.74	23.9782	1.9969	0.00056829	0.015685	NM_019694.2	56384	Letm1	transcript	5.73717	11.2145	-0.966953	0.000238425	0.0276354
mmu-miR-365-2-5p	8.11913	1.17918	1.9254	0.0018939	0.035639	NM_019694.2	56384	Letm1	transcript	5.73717	11.2145	-0.966953	0.000238425	0.0276354
mmu-miR-466i-5p	352.593	42.1158	2.344	5.49e-05	0.00284	TCONS_00020139	16880	Lifr	transcript	1.30271	0	Inf	0.000820671	0.0276354
mmu-miR-365-1-5p	42.0397	9.35359	1.749	0.00085832	0.022209	TCONS_00020139	16880	Lifr	transcript	1.30271	0	Inf	0.000820671	0.0276354
mmu-miR-214-3p	866.854	544.158	0.66229	0.00013468	0.0046466	TCONS_00020139	16880	Lifr	transcript	1.30271	0	Inf	0.000820671	0.0276354
mmu-miR-467b-5p	101.062	157.027	-0.63987	0.0013446	0.026507	TCONS_00020139	16880	Lifr	transcript	1.30271	0	Inf	0.000820671	0.0276354
mmu-miR-208a-5p	1.68468	98.5205	-4.8306	5.8e-20	1.2e-17	TCONS_00020139	16880	Lifr	transcript	1.30271	0	Inf	0.000820671	0.0276354
mmu-miR-214-5p	271.213	165.169	0.69303	6.26e-05	0.0028804	TCONS_00020139	16880	Lifr	transcript	1.30271	0	Inf	0.000820671	0.0276354
mmu-miR-221-3p	2269.82	1235.67	0.8571	8.52e-05	0.0035266	TCONS_00020139	16880	Lifr	transcript	1.30271	0	Inf	0.000820671	0.0276354
mmu-miR-200a-3p	143.74	23.9782	1.9969	0.00056829	0.015685	TCONS_00020139	16880	Lifr	transcript	1.30271	0	Inf	0.000820671	0.0276354
mmu-miR-3470b	336.04	56.7948	2.1526	1.98e-05	0.0013662	TCONS_00020139	16880	Lifr	transcript	1.30271	0	Inf	0.000820671	0.0276354
mmu-miR-365-2-5p	8.11913	1.17918	1.9254	0.0018939	0.035639	TCONS_00020139	16880	Lifr	transcript	1.30271	0	Inf	0.000820671	0.0276354
mmu-miR-467a-5p	101.062	157.027	-0.63987	0.0013446	0.026507	TCONS_00020139	16880	Lifr	transcript	1.30271	0	Inf	0.000820671	0.0276354
mmu-miR-466i-5p	352.593	42.1158	2.344	5.49e-05	0.00284	XM_030244824.1	110829	Lims1	transcript	2.3702	0.0304847	6.28078	0.00087713	0.028534
mmu-miR-221-3p	2269.82	1235.67	0.8571	8.52e-05	0.0035266	XM_030244824.1	110829	Lims1	transcript	2.3702	0.0304847	6.28078	0.00087713	0.028534
novel_1	13879.1	1929.61	2.0063	0.0013125	0.026507	NM_001365015.1	225341	Lims2	transcript	0.034765	3.56665	-6.68079	0.000537359	0.0276354
mmu-miR-221-3p	2269.82	1235.67	0.8571	8.52e-05	0.0035266	NM_001365015.1	225341	Lims2	transcript	0.034765	3.56665	-6.68079	0.000537359	0.0276354
mmu-miR-208a-5p	1.68468	98.5205	-4.8306	5.8e-20	1.2e-17	XM_036157326.1	217708	Lin52	transcript	1.99876	0	Inf	0.000157757	0.0276354
mmu-miR-467a-5p	101.062	157.027	-0.63987	0.0013446	0.026507	XM_036157326.1	217708	Lin52	transcript	1.99876	0	Inf	0.000157757	0.0276354
mmu-miR-874-3p	67.1603	160.155	-1.1385	0.0024216	0.042104	NM_025828.3	66890	Lman2	transcript	13.183	13.5281	-0.0372866	0.00183952	0.0400109
mmu-miR-466i-5p	352.593	42.1158	2.344	5.49e-05	0.00284	NM_025828.3	66890	Lman2	transcript	13.183	13.5281	-0.0372866	0.00183952	0.0400109
mmu-miR-214-3p	866.854	544.158	0.66229	0.00013468	0.0046466	NM_025828.3	66890	Lman2	transcript	13.183	13.5281	-0.0372866	0.00183952	0.0400109
mmu-miR-467b-5p	101.062	157.027	-0.63987	0.0013446	0.026507	NM_025828.3	66890	Lman2	transcript	13.183	13.5281	-0.0372866	0.00183952	0.0400109
mmu-miR-1983	29.9641	89.2893	-1.379	0.00016096	0.0051261	NM_025828.3	66890	Lman2	transcript	13.183	13.5281	-0.0372866	0.00183952	0.0400109
mmu-miR-200a-3p	143.74	23.9782	1.9969	0.00056829	0.015685	NM_025828.3	66890	Lman2	transcript	13.183	13.5281	-0.0372866	0.00183952	0.0400109
mmu-miR-467a-5p	101.062	157.027	-0.63987	0.0013446	0.026507	NM_025828.3	66890	Lman2	transcript	13.183	13.5281	-0.0372866	0.00183952	0.0400109
mmu-miR-365-1-5p	42.0397	9.35359	1.749	0.00085832	0.022209	XM_006519358.3	65107	Lrp10	transcript	2.10967	0.25084	3.07218	0.00255949	0.0482407
mmu-miR-690	1195.04	385.602	1.4425	0.0010865	0.02646	XM_006519358.3	65107	Lrp10	transcript	2.10967	0.25084	3.07218	0.00255949	0.0482407
mmu-miR-214-3p	866.854	544.158	0.66229	0.00013468	0.0046466	XM_006519358.3	65107	Lrp10	transcript	2.10967	0.25084	3.07218	0.00255949	0.0482407
mmu-miR-1983	29.9641	89.2893	-1.379	0.00016096	0.0051261	XM_006519358.3	65107	Lrp10	transcript	2.10967	0.25084	3.07218	0.00255949	0.0482407
mmu-miR-221-3p	2269.82	1235.67	0.8571	8.52e-05	0.0035266	XM_006519358.3	65107	Lrp10	transcript	2.10967	0.25084	3.07218	0.00255949	0.0482407
mmu-miR-3470b	336.04	56.7948	2.1526	1.98e-05	0.0013662	XM_006519358.3	65107	Lrp10	transcript	2.10967	0.25084	3.07218	0.00255949	0.0482407
mmu-miR-365-2-5p	8.11913	1.17918	1.9254	0.0018939	0.035639	XM_006519358.3	65107	Lrp10	transcript	2.10967	0.25084	3.07218	0.00255949	0.0482407
mmu-miR-874-3p	67.1603	160.155	-1.1385	0.0024216	0.042104	NM_011838.4	23936	Lynx1	transcript	25.7672	40.3626	-0.647487	0.000722116	0.0276354
mmu-miR-466i-5p	352.593	42.1158	2.344	5.49e-05	0.00284	NM_011838.4	23936	Lynx1	transcript	25.7672	40.3626	-0.647487	0.000722116	0.0276354
mmu-miR-214-3p	866.854	544.158	0.66229	0.00013468	0.0046466	NM_011838.4	23936	Lynx1	transcript	25.7672	40.3626	-0.647487	0.000722116	0.0276354
mmu-miR-1983	29.9641	89.2893	-1.379	0.00016096	0.0051261	NM_011838.4	23936	Lynx1	transcript	25.7672	40.3626	-0.647487	0.000722116	0.0276354
mmu-miR-200a-3p	143.74	23.9782	1.9969	0.00056829	0.015685	NM_011838.4	23936	Lynx1	transcript	25.7672	40.3626	-0.647487	0.000722116	0.0276354
mmu-miR-3470b	336.04	56.7948	2.1526	1.98e-05	0.0013662	NM_011838.4	23936	Lynx1	transcript	25.7672	40.3626	-0.647487	0.000722116	0.0276354
mmu-miR-467a-5p	101.062	157.027	-0.63987	0.0013446	0.026507	NM_011838.4	23936	Lynx1	transcript	25.7672	40.3626	-0.647487	0.000722116	0.0276354
mmu-miR-466i-5p	352.593	42.1158	2.344	5.49e-05	0.00284	NM_033322.3	93730	Lztfl1	transcript	1.35882	2.78852	-1.03715	0.00093363	0.0292165
mmu-miR-29b-2-5p	32.6134	115.312	-1.5205	0.0011706	0.026507	NM_033322.3	93730	Lztfl1	transcript	1.35882	2.78852	-1.03715	0.00093363	0.0292165
mmu-miR-690	1195.04	385.602	1.4425	0.0010865	0.02646	NM_033322.3	93730	Lztfl1	transcript	1.35882	2.78852	-1.03715	0.00093363	0.0292165
mmu-miR-467b-5p	101.062	157.027	-0.63987	0.0013446	0.026507	NM_033322.3	93730	Lztfl1	transcript	1.35882	2.78852	-1.03715	0.00093363	0.0292165
mmu-miR-200a-3p	143.74	23.9782	1.9969	0.00056829	0.015685	NM_033322.3	93730	Lztfl1	transcript	1.35882	2.78852	-1.03715	0.00093363	0.0292165
mmu-miR-146a-5p	1144.77	2572.83	-1.0815	0.0024408	0.042104	NM_033322.3	93730	Lztfl1	transcript	1.35882	2.78852	-1.03715	0.00093363	0.0292165
mmu-miR-193b-3p	657.266	247.533	1.3911	4.18e-26	1.73e-23	NM_025735.3	66734	Map1lc3a	transcript	150.77	177.832	-0.238161	0.00173253	0.038517
mmu-miR-200b-3p	90.9629	28.7971	1.6296	1.15e-10	1.59e-08	NM_001290345.1	225028	Map4k3	transcript	4.04558	0.033215	6.92837	0.00117069	0.0326432
mmu-miR-3470b	336.04	56.7948	2.1526	1.98e-05	0.0013662	NM_001290345.1	225028	Map4k3	transcript	4.04558	0.033215	6.92837	0.00117069	0.0326432
mmu-miR-690	1195.04	385.602	1.4425	0.0010865	0.02646	NM_013871.3	29857	Mapk12	transcript	4.47467	4.07264	0.135816	0.000259924	0.0276354
mmu-miR-208a-5p	1.68468	98.5205	-4.8306	5.8e-20	1.2e-17	NM_013871.3	29857	Mapk12	transcript	4.47467	4.07264	0.135816	0.000259924	0.0276354
mmu-miR-3470b	336.04	56.7948	2.1526	1.98e-05	0.0013662	NM_013871.3	29857	Mapk12	transcript	4.47467	4.07264	0.135816	0.000259924	0.0276354
mmu-miR-5126	30.4974	5.65546	2.0107	5.18e-05	0.00284	TCONS_00022742	30957	Mapk8ip3	transcript	0.033413	2.79614	-6.38688	0.000274522	0.0276354
mmu-miR-874-3p	67.1603	160.155	-1.1385	0.0024216	0.042104	TCONS_00022742	30957	Mapk8ip3	transcript	0.033413	2.79614	-6.38688	0.000274522	0.0276354
mmu-miR-365-1-5p	42.0397	9.35359	1.749	0.00085832	0.022209	TCONS_00022742	30957	Mapk8ip3	transcript	0.033413	2.79614	-6.38688	0.000274522	0.0276354
mmu-miR-29b-2-5p	32.6134	115.312	-1.5205	0.0011706	0.026507	TCONS_00022742	30957	Mapk8ip3	transcript	0.033413	2.79614	-6.38688	0.000274522	0.0276354
mmu-miR-214-3p	866.854	544.158	0.66229	0.00013468	0.0046466	TCONS_00022742	30957	Mapk8ip3	transcript	0.033413	2.79614	-6.38688	0.000274522	0.0276354
mmu-miR-193b-3p	657.266	247.533	1.3911	4.18e-26	1.73e-23	TCONS_00022742	30957	Mapk8ip3	transcript	0.033413	2.79614	-6.38688	0.000274522	0.0276354
mmu-miR-3470b	336.04	56.7948	2.1526	1.98e-05	0.0013662	TCONS_00022742	30957	Mapk8ip3	transcript	0.033413	2.79614	-6.38688	0.000274522	0.0276354
mmu-miR-146a-5p	1144.77	2572.83	-1.0815	0.0024408	0.042104	TCONS_00022742	30957	Mapk8ip3	transcript	0.033413	2.79614	-6.38688	0.000274522	0.0276354
mmu-miR-365-2-5p	8.11913	1.17918	1.9254	0.0018939	0.035639	TCONS_00022742	30957	Mapk8ip3	transcript	0.033413	2.79614	-6.38688	0.000274522	0.0276354
mmu-miR-690	1195.04	385.602	1.4425	0.0010865	0.02646	XM_011245351.4	223455	Marchf6	transcript	4.21198	0.316444	3.73447	0.00123918	0.0335637
mmu-miR-214-3p	866.854	544.158	0.66229	0.00013468	0.0046466	XM_011245351.4	223455	Marchf6	transcript	4.21198	0.316444	3.73447	0.00123918	0.0335637
mmu-miR-467b-5p	101.062	157.027	-0.63987	0.0013446	0.026507	XM_011245351.4	223455	Marchf6	transcript	4.21198	0.316444	3.73447	0.00123918	0.0335637
mmu-miR-208a-5p	1.68468	98.5205	-4.8306	5.8e-20	1.2e-17	XM_011245351.4	223455	Marchf6	transcript	4.21198	0.316444	3.73447	0.00123918	0.0335637
mmu-miR-200a-3p	143.74	23.9782	1.9969	0.00056829	0.015685	XM_011245351.4	223455	Marchf6	transcript	4.21198	0.316444	3.73447	0.00123918	0.0335637
mmu-miR-146a-5p	1144.77	2572.83	-1.0815	0.0024408	0.042104	XM_011245351.4	223455	Marchf6	transcript	4.21198	0.316444	3.73447	0.00123918	0.0335637
mmu-miR-467a-5p	101.062	157.027	-0.63987	0.0013446	0.026507	XM_011245351.4	223455	Marchf6	transcript	4.21198	0.316444	3.73447	0.00123918	0.0335637
mmu-miR-29b-2-5p	32.6134	115.312	-1.5205	0.0011706	0.026507	XM_036162424.1	57438	Marchf7	transcript	2.44408	0	Inf	0.000909325	0.0291578
mmu-miR-200a-3p	143.74	23.9782	1.9969	0.00056829	0.015685	XM_036162424.1	57438	Marchf7	transcript	2.44408	0	Inf	0.000909325	0.0291578
mmu-miR-365-1-5p	42.0397	9.35359	1.749	0.00085832	0.022209	NM_001164047.1	17189	Mb	transcript	2776.52	3936.66	-0.503698	0.00257741	0.0483411
mmu-miR-200a-3p	143.74	23.9782	1.9969	0.00056829	0.015685	NM_001164047.1	17189	Mb	transcript	2776.52	3936.66	-0.503698	0.00257741	0.0483411
mmu-miR-365-2-5p	8.11913	1.17918	1.9254	0.0018939	0.035639	NM_001164047.1	17189	Mb	transcript	2776.52	3936.66	-0.503698	0.00257741	0.0483411
mmu-miR-467b-5p	101.062	157.027	-0.63987	0.0013446	0.026507	NM_008617.2	17448	Mdh2	transcript	345.903	370.543	-0.0992737	0.00103179	0.0304533
mmu-miR-6538	304.502	74.5948	1.8593	7.2e-07	7.45e-05	NM_008617.2	17448	Mdh2	transcript	345.903	370.543	-0.0992737	0.00103179	0.0304533
mmu-miR-200b-3p	90.9629	28.7971	1.6296	1.15e-10	1.59e-08	NM_001081979.2	17257	Mecp2	transcript	3.25013	3.79955	-0.22533	0.000372863	0.0276354
mmu-miR-466i-5p	352.593	42.1158	2.344	5.49e-05	0.00284	NM_001081979.2	17257	Mecp2	transcript	3.25013	3.79955	-0.22533	0.000372863	0.0276354
mmu-miR-29b-2-5p	32.6134	115.312	-1.5205	0.0011706	0.026507	NM_001081979.2	17257	Mecp2	transcript	3.25013	3.79955	-0.22533	0.000372863	0.0276354
mmu-miR-214-3p	866.854	544.158	0.66229	0.00013468	0.0046466	NM_001081979.2	17257	Mecp2	transcript	3.25013	3.79955	-0.22533	0.000372863	0.0276354
mmu-miR-208a-5p	1.68468	98.5205	-4.8306	5.8e-20	1.2e-17	NM_001081979.2	17257	Mecp2	transcript	3.25013	3.79955	-0.22533	0.000372863	0.0276354
mmu-miR-193b-3p	657.266	247.533	1.3911	4.18e-26	1.73e-23	NM_001081979.2	17257	Mecp2	transcript	3.25013	3.79955	-0.22533	0.000372863	0.0276354
mmu-miR-200a-3p	143.74	23.9782	1.9969	0.00056829	0.015685	NM_001081979.2	17257	Mecp2	transcript	3.25013	3.79955	-0.22533	0.000372863	0.0276354
mmu-miR-3470b	336.04	56.7948	2.1526	1.98e-05	0.0013662	NM_001081979.2	17257	Mecp2	transcript	3.25013	3.79955	-0.22533	0.000372863	0.0276354
mmu-miR-146a-5p	1144.77	2572.83	-1.0815	0.0024408	0.042104	NM_001081979.2	17257	Mecp2	transcript	3.25013	3.79955	-0.22533	0.000372863	0.0276354
mmu-miR-221-3p	2269.82	1235.67	0.8571	8.52e-05	0.0035266	XM_036165966.1	338366	Mia3	transcript	2.56827	0.215785	3.57313	0.00266393	0.0492416
mmu-miR-5126	30.4974	5.65546	2.0107	5.18e-05	0.00284	NM_026524.4	68041	Mid1ip1	transcript	37.9267	30.3802	0.320079	0.000987289	0.0299274
mmu-miR-874-3p	67.1603	160.155	-1.1385	0.0024216	0.042104	NM_026524.4	68041	Mid1ip1	transcript	37.9267	30.3802	0.320079	0.000987289	0.0299274
mmu-miR-214-3p	866.854	544.158	0.66229	0.00013468	0.0046466	NM_026524.4	68041	Mid1ip1	transcript	37.9267	30.3802	0.320079	0.000987289	0.0299274
mmu-miR-200b-3p	90.9629	28.7971	1.6296	1.15e-10	1.59e-08	XM_030248555.2	239555	Mief1	transcript	1.40417	0.071697	4.29166	0.00216897	0.0438208
mmu-miR-466i-5p	352.593	42.1158	2.344	5.49e-05	0.00284	XM_030248555.2	239555	Mief1	transcript	1.40417	0.071697	4.29166	0.00216897	0.0438208
mmu-miR-690	1195.04	385.602	1.4425	0.0010865	0.02646	XM_030248555.2	239555	Mief1	transcript	1.40417	0.071697	4.29166	0.00216897	0.0438208
mmu-miR-214-3p	866.854	544.158	0.66229	0.00013468	0.0046466	XM_030248555.2	239555	Mief1	transcript	1.40417	0.071697	4.29166	0.00216897	0.0438208
mmu-miR-208a-5p	1.68468	98.5205	-4.8306	5.8e-20	1.2e-17	XM_030248555.2	239555	Mief1	transcript	1.40417	0.071697	4.29166	0.00216897	0.0438208
mmu-miR-3470b	336.04	56.7948	2.1526	1.98e-05	0.0013662	XM_030248555.2	239555	Mief1	transcript	1.40417	0.071697	4.29166	0.00216897	0.0438208
mmu-miR-466i-5p	352.593	42.1158	2.344	5.49e-05	0.00284	XM_017321605.3	27418	Mkln1	transcript	1.57045	0.0165473	6.56843	0.00103662	0.0304533
mmu-miR-29b-2-5p	32.6134	115.312	-1.5205	0.0011706	0.026507	XM_017321605.3	27418	Mkln1	transcript	1.57045	0.0165473	6.56843	0.00103662	0.0304533
mmu-miR-690	1195.04	385.602	1.4425	0.0010865	0.02646	XM_017321605.3	27418	Mkln1	transcript	1.57045	0.0165473	6.56843	0.00103662	0.0304533
mmu-miR-214-3p	866.854	544.158	0.66229	0.00013468	0.0046466	XM_017321605.3	27418	Mkln1	transcript	1.57045	0.0165473	6.56843	0.00103662	0.0304533
mmu-miR-467b-5p	101.062	157.027	-0.63987	0.0013446	0.026507	XM_017321605.3	27418	Mkln1	transcript	1.57045	0.0165473	6.56843	0.00103662	0.0304533
mmu-miR-208a-5p	1.68468	98.5205	-4.8306	5.8e-20	1.2e-17	XM_017321605.3	27418	Mkln1	transcript	1.57045	0.0165473	6.56843	0.00103662	0.0304533
mmu-miR-193b-3p	657.266	247.533	1.3911	4.18e-26	1.73e-23	XM_017321605.3	27418	Mkln1	transcript	1.57045	0.0165473	6.56843	0.00103662	0.0304533
mmu-miR-1983	29.9641	89.2893	-1.379	0.00016096	0.0051261	XM_017321605.3	27418	Mkln1	transcript	1.57045	0.0165473	6.56843	0.00103662	0.0304533
mmu-miR-221-3p	2269.82	1235.67	0.8571	8.52e-05	0.0035266	XM_017321605.3	27418	Mkln1	transcript	1.57045	0.0165473	6.56843	0.00103662	0.0304533
mmu-miR-200a-3p	143.74	23.9782	1.9969	0.00056829	0.015685	XM_017321605.3	27418	Mkln1	transcript	1.57045	0.0165473	6.56843	0.00103662	0.0304533
mmu-miR-3470b	336.04	56.7948	2.1526	1.98e-05	0.0013662	XM_017321605.3	27418	Mkln1	transcript	1.57045	0.0165473	6.56843	0.00103662	0.0304533
mmu-miR-466i-5p	352.593	42.1158	2.344	5.49e-05	0.00284	NM_008608.4	17387	Mmp14	transcript	4.99864	1.90388	1.39259	0.00209356	0.0430152
mmu-miR-29b-2-5p	32.6134	115.312	-1.5205	0.0011706	0.026507	NM_008608.4	17387	Mmp14	transcript	4.99864	1.90388	1.39259	0.00209356	0.0430152
mmu-miR-193b-3p	657.266	247.533	1.3911	4.18e-26	1.73e-23	NM_008608.4	17387	Mmp14	transcript	4.99864	1.90388	1.39259	0.00209356	0.0430152
mmu-miR-214-5p	271.213	165.169	0.69303	6.26e-05	0.0028804	NM_008608.4	17387	Mmp14	transcript	4.99864	1.90388	1.39259	0.00209356	0.0430152
mmu-miR-365-1-5p	42.0397	9.35359	1.749	0.00085832	0.022209	NM_053159.4	94062	Mrpl3	transcript	20.8991	24.078	-0.204272	1.09e-05	0.0155632
mmu-miR-29b-2-5p	32.6134	115.312	-1.5205	0.0011706	0.026507	NM_053159.4	94062	Mrpl3	transcript	20.8991	24.078	-0.204272	1.09e-05	0.0155632
mmu-miR-690	1195.04	385.602	1.4425	0.0010865	0.02646	NM_053159.4	94062	Mrpl3	transcript	20.8991	24.078	-0.204272	1.09e-05	0.0155632
mmu-miR-214-3p	866.854	544.158	0.66229	0.00013468	0.0046466	NM_053159.4	94062	Mrpl3	transcript	20.8991	24.078	-0.204272	1.09e-05	0.0155632
mmu-miR-208a-5p	1.68468	98.5205	-4.8306	5.8e-20	1.2e-17	NM_053159.4	94062	Mrpl3	transcript	20.8991	24.078	-0.204272	1.09e-05	0.0155632
mmu-miR-193b-3p	657.266	247.533	1.3911	4.18e-26	1.73e-23	NM_053159.4	94062	Mrpl3	transcript	20.8991	24.078	-0.204272	1.09e-05	0.0155632
mmu-miR-221-3p	2269.82	1235.67	0.8571	8.52e-05	0.0035266	NM_053159.4	94062	Mrpl3	transcript	20.8991	24.078	-0.204272	1.09e-05	0.0155632
mmu-miR-365-2-5p	8.11913	1.17918	1.9254	0.0018939	0.035639	NM_053159.4	94062	Mrpl3	transcript	20.8991	24.078	-0.204272	1.09e-05	0.0155632
mmu-miR-200b-3p	90.9629	28.7971	1.6296	1.15e-10	1.59e-08	NM_026443.4	67900	Mtfp1	transcript	27.5971	35.7028	-0.37152	0.000338742	0.0276354
mmu-miR-874-3p	67.1603	160.155	-1.1385	0.0024216	0.042104	NM_026443.4	67900	Mtfp1	transcript	27.5971	35.7028	-0.37152	0.000338742	0.0276354
mmu-miR-1195	19.6113	1.98363	2.212	0.0004848	0.014336	NM_026443.4	67900	Mtfp1	transcript	27.5971	35.7028	-0.37152	0.000338742	0.0276354
mmu-miR-214-3p	866.854	544.158	0.66229	0.00013468	0.0046466	NM_001164191.1	17772	Mtm1	transcript	4.86962	4.57993	0.0884856	0.00244339	0.0472115
mmu-miR-208a-5p	1.68468	98.5205	-4.8306	5.8e-20	1.2e-17	NM_001164191.1	17772	Mtm1	transcript	4.86962	4.57993	0.0884856	0.00244339	0.0472115
mmu-miR-221-3p	2269.82	1235.67	0.8571	8.52e-05	0.0035266	NM_001164191.1	17772	Mtm1	transcript	4.86962	4.57993	0.0884856	0.00244339	0.0472115
mmu-miR-466i-5p	352.593	42.1158	2.344	5.49e-05	0.00284	NM_001359505.1	77521	Mtus2	transcript	30.9488	21.1013	0.552555	0.000558842	0.0276354
mmu-miR-29b-2-5p	32.6134	115.312	-1.5205	0.0011706	0.026507	NM_001359505.1	77521	Mtus2	transcript	30.9488	21.1013	0.552555	0.000558842	0.0276354
mmu-miR-214-3p	866.854	544.158	0.66229	0.00013468	0.0046466	NM_001359505.1	77521	Mtus2	transcript	30.9488	21.1013	0.552555	0.000558842	0.0276354
mmu-miR-208a-5p	1.68468	98.5205	-4.8306	5.8e-20	1.2e-17	NM_001359505.1	77521	Mtus2	transcript	30.9488	21.1013	0.552555	0.000558842	0.0276354
mmu-miR-221-3p	2269.82	1235.67	0.8571	8.52e-05	0.0035266	NM_001359505.1	77521	Mtus2	transcript	30.9488	21.1013	0.552555	0.000558842	0.0276354
mmu-miR-200a-3p	143.74	23.9782	1.9969	0.00056829	0.015685	NM_001359505.1	77521	Mtus2	transcript	30.9488	21.1013	0.552555	0.000558842	0.0276354
mmu-miR-467a-5p	101.062	157.027	-0.63987	0.0013446	0.026507	NM_001359505.1	77521	Mtus2	transcript	30.9488	21.1013	0.552555	0.000558842	0.0276354
mmu-miR-214-5p	271.213	165.169	0.69303	6.26e-05	0.0028804	NM_008653.2	17868	Mybpc3	transcript	367.999	0	Inf	2.16e-05	0.0155632
mmu-miR-874-3p	67.1603	160.155	-1.1385	0.0024216	0.042104	NM_001355755.1	17896	Myl4	transcript	9.13829	0.191058	5.57984	0.00178945	0.0391774
mmu-miR-29b-2-5p	32.6134	115.312	-1.5205	0.0011706	0.026507	XM_006521705.3	107589	Mylk	transcript	3.13462	3.83408	-0.290594	0.00265995	0.0492416
mmu-miR-214-3p	866.854	544.158	0.66229	0.00013468	0.0046466	XM_006521705.3	107589	Mylk	transcript	3.13462	3.83408	-0.290594	0.00265995	0.0492416
mmu-miR-467b-5p	101.062	157.027	-0.63987	0.0013446	0.026507	XM_006521705.3	107589	Mylk	transcript	3.13462	3.83408	-0.290594	0.00265995	0.0492416
mmu-miR-467a-5p	101.062	157.027	-0.63987	0.0013446	0.026507	XM_006521705.3	107589	Mylk	transcript	3.13462	3.83408	-0.290594	0.00265995	0.0492416
mmu-miR-690	1195.04	385.602	1.4425	0.0010865	0.02646	XM_006516668.5	238564	Mylk4	transcript	20.0108	41.6364	-1.05707	0.000217989	0.0276354
mmu-miR-193b-3p	657.266	247.533	1.3911	4.18e-26	1.73e-23	XM_006516668.5	238564	Mylk4	transcript	20.0108	41.6364	-1.05707	0.000217989	0.0276354
novel_1	13879.1	1929.61	2.0063	0.0013125	0.026507	XM_006516668.5	238564	Mylk4	transcript	20.0108	41.6364	-1.05707	0.000217989	0.0276354
mmu-miR-200a-3p	143.74	23.9782	1.9969	0.00056829	0.015685	XM_006516668.5	238564	Mylk4	transcript	20.0108	41.6364	-1.05707	0.000217989	0.0276354
mmu-miR-3470b	336.04	56.7948	2.1526	1.98e-05	0.0013662	XM_006516668.5	238564	Mylk4	transcript	20.0108	41.6364	-1.05707	0.000217989	0.0276354
mmu-miR-29b-2-5p	32.6134	115.312	-1.5205	0.0011706	0.026507	NM_010865.3	17926	Myoc	transcript	4.62467	1.26554	1.8696	0.000550435	0.0276354
mmu-miR-874-3p	67.1603	160.155	-1.1385	0.0024216	0.042104	NM_008664.2	17930	Myom2	transcript	424.854	190.825	1.15472	0.000145974	0.0276354
mmu-miR-200b-3p	90.9629	28.7971	1.6296	1.15e-10	1.59e-08	NM_001033208.4	102371	Myzap	transcript	138.22	103.153	0.422188	0.00267245	0.0492416
mmu-miR-874-3p	67.1603	160.155	-1.1385	0.0024216	0.042104	XM_006538665.4	192185	Nadk	transcript	0.972007	0.0104583	6.53824	0.00196035	0.0413468
mmu-miR-466i-5p	352.593	42.1158	2.344	5.49e-05	0.00284	XM_006538665.4	192185	Nadk	transcript	0.972007	0.0104583	6.53824	0.00196035	0.0413468
mmu-miR-690	1195.04	385.602	1.4425	0.0010865	0.02646	XM_006538665.4	192185	Nadk	transcript	0.972007	0.0104583	6.53824	0.00196035	0.0413468
mmu-miR-214-3p	866.854	544.158	0.66229	0.00013468	0.0046466	XM_006538665.4	192185	Nadk	transcript	0.972007	0.0104583	6.53824	0.00196035	0.0413468
mmu-miR-200a-3p	143.74	23.9782	1.9969	0.00056829	0.015685	XM_006538665.4	192185	Nadk	transcript	0.972007	0.0104583	6.53824	0.00196035	0.0413468
mmu-miR-874-3p	67.1603	160.155	-1.1385	0.0024216	0.042104	NM_001115132.2	52683	Ncaph2	transcript	3.1926	0.540685	2.56187	0.00108613	0.0314517
mmu-miR-466i-5p	352.593	42.1158	2.344	5.49e-05	0.00284	NM_001115132.2	52683	Ncaph2	transcript	3.1926	0.540685	2.56187	0.00108613	0.0314517
mmu-miR-214-3p	866.854	544.158	0.66229	0.00013468	0.0046466	NM_001115132.2	52683	Ncaph2	transcript	3.1926	0.540685	2.56187	0.00108613	0.0314517
mmu-miR-214-5p	271.213	165.169	0.69303	6.26e-05	0.0028804	NM_001115132.2	52683	Ncaph2	transcript	3.1926	0.540685	2.56187	0.00108613	0.0314517
novel_1	13879.1	1929.61	2.0063	0.0013125	0.026507	NM_001115132.2	52683	Ncaph2	transcript	3.1926	0.540685	2.56187	0.00108613	0.0314517
mmu-miR-365-1-5p	42.0397	9.35359	1.749	0.00085832	0.022209	NM_010880.3	17975	Ncl	transcript	20.8971	19.0506	0.133468	0.00081386	0.0276354
mmu-miR-690	1195.04	385.602	1.4425	0.0010865	0.02646	NM_010880.3	17975	Ncl	transcript	20.8971	19.0506	0.133468	0.00081386	0.0276354
mmu-miR-193b-3p	657.266	247.533	1.3911	4.18e-26	1.73e-23	NM_010880.3	17975	Ncl	transcript	20.8971	19.0506	0.133468	0.00081386	0.0276354
mmu-miR-214-5p	271.213	165.169	0.69303	6.26e-05	0.0028804	NM_010880.3	17975	Ncl	transcript	20.8971	19.0506	0.133468	0.00081386	0.0276354
mmu-miR-221-3p	2269.82	1235.67	0.8571	8.52e-05	0.0035266	NM_010880.3	17975	Ncl	transcript	20.8971	19.0506	0.133468	0.00081386	0.0276354
mmu-miR-3470b	336.04	56.7948	2.1526	1.98e-05	0.0013662	NM_010880.3	17975	Ncl	transcript	20.8971	19.0506	0.133468	0.00081386	0.0276354
mmu-miR-365-2-5p	8.11913	1.17918	1.9254	0.0018939	0.035639	NM_010880.3	17975	Ncl	transcript	20.8971	19.0506	0.133468	0.00081386	0.0276354
mmu-miR-467a-5p	101.062	157.027	-0.63987	0.0013446	0.026507	NM_010880.3	17975	Ncl	transcript	20.8971	19.0506	0.133468	0.00081386	0.0276354
mmu-miR-874-3p	67.1603	160.155	-1.1385	0.0024216	0.042104	NM_023317.2	67203	Nde1	transcript	1.95862	4.78075	-1.2874	2.29e-05	0.0155632
mmu-miR-466i-5p	352.593	42.1158	2.344	5.49e-05	0.00284	NM_023317.2	67203	Nde1	transcript	1.95862	4.78075	-1.2874	2.29e-05	0.0155632
mmu-miR-690	1195.04	385.602	1.4425	0.0010865	0.02646	NM_023317.2	67203	Nde1	transcript	1.95862	4.78075	-1.2874	2.29e-05	0.0155632
mmu-miR-874-3p	67.1603	160.155	-1.1385	0.0024216	0.042104	NM_008681.2	17988	Ndrg1	transcript	13.4879	7.27813	0.890022	0.00249471	0.0476436
mmu-miR-29b-2-5p	32.6134	115.312	-1.5205	0.0011706	0.026507	NM_008681.2	17988	Ndrg1	transcript	13.4879	7.27813	0.890022	0.00249471	0.0476436
mmu-miR-214-3p	866.854	544.158	0.66229	0.00013468	0.0046466	NM_008681.2	17988	Ndrg1	transcript	13.4879	7.27813	0.890022	0.00249471	0.0476436
mmu-miR-1983	29.9641	89.2893	-1.379	0.00016096	0.0051261	NM_008681.2	17988	Ndrg1	transcript	13.4879	7.27813	0.890022	0.00249471	0.0476436
mmu-miR-29b-2-5p	32.6134	115.312	-1.5205	0.0011706	0.026507	NM_025987.3	67130	Ndufa6	transcript	145.358	177.624	-0.28922	0.000487275	0.0276354
mmu-miR-193b-3p	657.266	247.533	1.3911	4.18e-26	1.73e-23	NM_025987.3	67130	Ndufa6	transcript	145.358	177.624	-0.28922	0.000487275	0.0276354
mmu-miR-3470b	336.04	56.7948	2.1526	1.98e-05	0.0013662	NM_025987.3	67130	Ndufa6	transcript	145.358	177.624	-0.28922	0.000487275	0.0276354
mmu-miR-208a-5p	1.68468	98.5205	-4.8306	5.8e-20	1.2e-17	NM_025843.3	66916	Ndufb7	transcript	133.794	201.7	-0.592203	0.000638561	0.0276354
mmu-miR-874-3p	67.1603	160.155	-1.1385	0.0024216	0.042104	NM_001362722.1	74103	Nebl	transcript	26.0163	0	Inf	2.74e-05	0.0155632
mmu-miR-466i-5p	352.593	42.1158	2.344	5.49e-05	0.00284	NM_001362722.1	74103	Nebl	transcript	26.0163	0	Inf	2.74e-05	0.0155632
mmu-miR-29b-2-5p	32.6134	115.312	-1.5205	0.0011706	0.026507	NM_001362722.1	74103	Nebl	transcript	26.0163	0	Inf	2.74e-05	0.0155632
mmu-miR-690	1195.04	385.602	1.4425	0.0010865	0.02646	NM_001362722.1	74103	Nebl	transcript	26.0163	0	Inf	2.74e-05	0.0155632
mmu-miR-193b-3p	657.266	247.533	1.3911	4.18e-26	1.73e-23	NM_001362722.1	74103	Nebl	transcript	26.0163	0	Inf	2.74e-05	0.0155632
mmu-miR-3470b	336.04	56.7948	2.1526	1.98e-05	0.0013662	NM_001362722.1	74103	Nebl	transcript	26.0163	0	Inf	2.74e-05	0.0155632
mmu-miR-146a-5p	1144.77	2572.83	-1.0815	0.0024408	0.042104	NM_001362722.1	74103	Nebl	transcript	26.0163	0	Inf	2.74e-05	0.0155632
mmu-miR-467a-5p	101.062	157.027	-0.63987	0.0013446	0.026507	NM_001362722.1	74103	Nebl	transcript	26.0163	0	Inf	2.74e-05	0.0155632
mmu-miR-146a-5p	1144.77	2572.83	-1.0815	0.0024408	0.042104	NM_199465.3	68810	Nexn	transcript	1.38403	0	Inf	0.00163825	0.0377323
mmu-miR-466i-5p	352.593	42.1158	2.344	5.49e-05	0.00284	TCONS_00016218	18016	Nf2	transcript	3.89182	0	Inf	0.000820671	0.0276354
mmu-miR-365-1-5p	42.0397	9.35359	1.749	0.00085832	0.022209	TCONS_00016218	18016	Nf2	transcript	3.89182	0	Inf	0.000820671	0.0276354
mmu-miR-1983	29.9641	89.2893	-1.379	0.00016096	0.0051261	TCONS_00016218	18016	Nf2	transcript	3.89182	0	Inf	0.000820671	0.0276354
mmu-miR-146a-5p	1144.77	2572.83	-1.0815	0.0024408	0.042104	TCONS_00016218	18016	Nf2	transcript	3.89182	0	Inf	0.000820671	0.0276354
mmu-miR-365-2-5p	8.11913	1.17918	1.9254	0.0018939	0.035639	TCONS_00016218	18016	Nf2	transcript	3.89182	0	Inf	0.000820671	0.0276354
mmu-miR-5126	30.4974	5.65546	2.0107	5.18e-05	0.00284	NM_008688.3	18029	Nfic	transcript	4.59623	14.0914	-1.61629	0.00200236	0.0419257
mmu-miR-874-3p	67.1603	160.155	-1.1385	0.0024216	0.042104	NM_008688.3	18029	Nfic	transcript	4.59623	14.0914	-1.61629	0.00200236	0.0419257
mmu-miR-365-1-5p	42.0397	9.35359	1.749	0.00085832	0.022209	NM_008688.3	18029	Nfic	transcript	4.59623	14.0914	-1.61629	0.00200236	0.0419257
mmu-miR-214-3p	866.854	544.158	0.66229	0.00013468	0.0046466	NM_008688.3	18029	Nfic	transcript	4.59623	14.0914	-1.61629	0.00200236	0.0419257
mmu-miR-467b-5p	101.062	157.027	-0.63987	0.0013446	0.026507	NM_008688.3	18029	Nfic	transcript	4.59623	14.0914	-1.61629	0.00200236	0.0419257
mmu-miR-193b-3p	657.266	247.533	1.3911	4.18e-26	1.73e-23	NM_008688.3	18029	Nfic	transcript	4.59623	14.0914	-1.61629	0.00200236	0.0419257
mmu-miR-1983	29.9641	89.2893	-1.379	0.00016096	0.0051261	NM_008688.3	18029	Nfic	transcript	4.59623	14.0914	-1.61629	0.00200236	0.0419257
mmu-miR-200a-3p	143.74	23.9782	1.9969	0.00056829	0.015685	NM_008688.3	18029	Nfic	transcript	4.59623	14.0914	-1.61629	0.00200236	0.0419257
mmu-miR-3470b	336.04	56.7948	2.1526	1.98e-05	0.0013662	NM_008688.3	18029	Nfic	transcript	4.59623	14.0914	-1.61629	0.00200236	0.0419257
mmu-miR-365-2-5p	8.11913	1.17918	1.9254	0.0018939	0.035639	NM_008688.3	18029	Nfic	transcript	4.59623	14.0914	-1.61629	0.00200236	0.0419257
mmu-miR-467a-5p	101.062	157.027	-0.63987	0.0013446	0.026507	NM_008700.2	18091	Nkx2-5	transcript	17.6419	21.8241	-0.306919	0.000617189	0.0276354
mmu-miR-874-3p	67.1603	160.155	-1.1385	0.0024216	0.042104	NM_133702.3	68979	Nol11	transcript	5.69427	3.78451	0.589407	0.00138039	0.0351828
mmu-miR-1195	19.6113	1.98363	2.212	0.0004848	0.014336	NM_133702.3	68979	Nol11	transcript	5.69427	3.78451	0.589407	0.00138039	0.0351828
mmu-miR-466i-5p	352.593	42.1158	2.344	5.49e-05	0.00284	NM_133831.3	68077	Nop53	transcript	25.343	23.991	0.0790944	0.000321251	0.0276354
mmu-miR-29b-2-5p	32.6134	115.312	-1.5205	0.0011706	0.026507	NM_133831.3	68077	Nop53	transcript	25.343	23.991	0.0790944	0.000321251	0.0276354
mmu-miR-214-3p	866.854	544.158	0.66229	0.00013468	0.0046466	NM_133831.3	68077	Nop53	transcript	25.343	23.991	0.0790944	0.000321251	0.0276354
novel_1	13879.1	1929.61	2.0063	0.0013125	0.026507	NM_133831.3	68077	Nop53	transcript	25.343	23.991	0.0790944	0.000321251	0.0276354
mmu-miR-221-3p	2269.82	1235.67	0.8571	8.52e-05	0.0035266	NM_133831.3	68077	Nop53	transcript	25.343	23.991	0.0790944	0.000321251	0.0276354
mmu-miR-200a-3p	143.74	23.9782	1.9969	0.00056829	0.015685	NM_133831.3	68077	Nop53	transcript	25.343	23.991	0.0790944	0.000321251	0.0276354
mmu-miR-146a-5p	1144.77	2572.83	-1.0815	0.0024408	0.042104	NM_133831.3	68077	Nop53	transcript	25.343	23.991	0.0790944	0.000321251	0.0276354
mmu-miR-874-3p	67.1603	160.155	-1.1385	0.0024216	0.042104	NM_008706.5	18104	Nqo1	transcript	44.8113	23.425	0.935811	0.000167384	0.0276354
mmu-miR-874-3p	67.1603	160.155	-1.1385	0.0024216	0.042104	XM_006517134.5	18193	Nsd1	transcript	1.9852	0.448937	2.1447	0.00060106	0.0276354
mmu-miR-466i-5p	352.593	42.1158	2.344	5.49e-05	0.00284	XM_006517134.5	18193	Nsd1	transcript	1.9852	0.448937	2.1447	0.00060106	0.0276354
mmu-miR-214-3p	866.854	544.158	0.66229	0.00013468	0.0046466	XM_006517134.5	18193	Nsd1	transcript	1.9852	0.448937	2.1447	0.00060106	0.0276354
mmu-miR-208a-5p	1.68468	98.5205	-4.8306	5.8e-20	1.2e-17	XM_006517134.5	18193	Nsd1	transcript	1.9852	0.448937	2.1447	0.00060106	0.0276354
mmu-miR-193b-3p	657.266	247.533	1.3911	4.18e-26	1.73e-23	XM_006517134.5	18193	Nsd1	transcript	1.9852	0.448937	2.1447	0.00060106	0.0276354
mmu-miR-200a-3p	143.74	23.9782	1.9969	0.00056829	0.015685	XM_006517134.5	18193	Nsd1	transcript	1.9852	0.448937	2.1447	0.00060106	0.0276354
mmu-miR-3470b	336.04	56.7948	2.1526	1.98e-05	0.0013662	XM_006517134.5	18193	Nsd1	transcript	1.9852	0.448937	2.1447	0.00060106	0.0276354
mmu-miR-146a-5p	1144.77	2572.83	-1.0815	0.0024408	0.042104	XM_006517134.5	18193	Nsd1	transcript	1.9852	0.448937	2.1447	0.00060106	0.0276354
mmu-miR-208a-3p	19.6731	144.716	-2.1853	0.00010883	0.0040958	XM_006517134.5	18193	Nsd1	transcript	1.9852	0.448937	2.1447	0.00060106	0.0276354
mmu-miR-214-3p	866.854	544.158	0.66229	0.00013468	0.0046466	XM_006507175.4	101706	Numa1	transcript	2.05864	1.25498	0.714031	0.00217807	0.0438821
mmu-miR-221-3p	2269.82	1235.67	0.8571	8.52e-05	0.0035266	NM_001081130.2	239017	Ogdhl	transcript	14.1903	35.4926	-1.32261	0.0017532	0.0386422
mmu-miR-874-3p	67.1603	160.155	-1.1385	0.0024216	0.042104	XM_030253061.2	100273	Osbpl9	transcript	0.913933	0	Inf	0.000964603	0.0297987
mmu-miR-466i-5p	352.593	42.1158	2.344	5.49e-05	0.00284	XM_030253061.2	100273	Osbpl9	transcript	0.913933	0	Inf	0.000964603	0.0297987
mmu-miR-146a-5p	1144.77	2572.83	-1.0815	0.0024408	0.042104	XM_030253061.2	100273	Osbpl9	transcript	0.913933	0	Inf	0.000964603	0.0297987
mmu-miR-365-1-5p	42.0397	9.35359	1.749	0.00085832	0.022209	NM_008773.4	18442	P2ry2	transcript	5.26081	6.19008	-0.234674	0.00171046	0.0383222
mmu-miR-29b-2-5p	32.6134	115.312	-1.5205	0.0011706	0.026507	NM_008773.4	18442	P2ry2	transcript	5.26081	6.19008	-0.234674	0.00171046	0.0383222
mmu-miR-221-3p	2269.82	1235.67	0.8571	8.52e-05	0.0035266	NM_008773.4	18442	P2ry2	transcript	5.26081	6.19008	-0.234674	0.00171046	0.0383222
mmu-miR-365-2-5p	8.11913	1.17918	1.9254	0.0018939	0.035639	NM_008773.4	18442	P2ry2	transcript	5.26081	6.19008	-0.234674	0.00171046	0.0383222
mmu-miR-466i-5p	352.593	42.1158	2.344	5.49e-05	0.00284	XM_036159410.1	23970	Pacsin2	transcript	0.953554	0	Inf	0.000794675	0.0276354
mmu-miR-690	1195.04	385.602	1.4425	0.0010865	0.02646	XM_036159410.1	23970	Pacsin2	transcript	0.953554	0	Inf	0.000794675	0.0276354
mmu-miR-208a-5p	1.68468	98.5205	-4.8306	5.8e-20	1.2e-17	XM_036159410.1	23970	Pacsin2	transcript	0.953554	0	Inf	0.000794675	0.0276354
mmu-miR-467a-5p	101.062	157.027	-0.63987	0.0013446	0.026507	XM_036159410.1	23970	Pacsin2	transcript	0.953554	0	Inf	0.000794675	0.0276354
mmu-miR-466i-5p	352.593	42.1158	2.344	5.49e-05	0.00284	NM_025939.3	67054	Paics	transcript	8.892	0.00326633	11.4106	0.000731044	0.0276354
mmu-miR-200a-3p	143.74	23.9782	1.9969	0.00056829	0.015685	NM_025939.3	67054	Paics	transcript	8.892	0.00326633	11.4106	0.000731044	0.0276354
mmu-miR-208a-5p	1.68468	98.5205	-4.8306	5.8e-20	1.2e-17	XM_036161263.1	67869	Paip2	transcript	4.11472	0	Inf	0.000820671	0.0276354
mmu-miR-221-3p	2269.82	1235.67	0.8571	8.52e-05	0.0035266	XM_036161263.1	67869	Paip2	transcript	4.11472	0	Inf	0.000820671	0.0276354
mmu-miR-200a-3p	143.74	23.9782	1.9969	0.00056829	0.015685	XM_036161263.1	67869	Paip2	transcript	4.11472	0	Inf	0.000820671	0.0276354
mmu-miR-146a-5p	1144.77	2572.83	-1.0815	0.0024408	0.042104	XM_036161263.1	67869	Paip2	transcript	4.11472	0	Inf	0.000820671	0.0276354
mmu-miR-200b-3p	90.9629	28.7971	1.6296	1.15e-10	1.59e-08	NM_146169.2	232164	Paip2b	transcript	8.94612	8.43108	0.0855459	0.00119144	0.0329033
mmu-miR-466i-5p	352.593	42.1158	2.344	5.49e-05	0.00284	NM_146169.2	232164	Paip2b	transcript	8.94612	8.43108	0.0855459	0.00119144	0.0329033
mmu-miR-365-1-5p	42.0397	9.35359	1.749	0.00085832	0.022209	NM_146169.2	232164	Paip2b	transcript	8.94612	8.43108	0.0855459	0.00119144	0.0329033
mmu-miR-214-3p	866.854	544.158	0.66229	0.00013468	0.0046466	NM_146169.2	232164	Paip2b	transcript	8.94612	8.43108	0.0855459	0.00119144	0.0329033
mmu-miR-208a-5p	1.68468	98.5205	-4.8306	5.8e-20	1.2e-17	NM_146169.2	232164	Paip2b	transcript	8.94612	8.43108	0.0855459	0.00119144	0.0329033
mmu-miR-193b-3p	657.266	247.533	1.3911	4.18e-26	1.73e-23	NM_146169.2	232164	Paip2b	transcript	8.94612	8.43108	0.0855459	0.00119144	0.0329033
mmu-miR-214-5p	271.213	165.169	0.69303	6.26e-05	0.0028804	NM_146169.2	232164	Paip2b	transcript	8.94612	8.43108	0.0855459	0.00119144	0.0329033
mmu-miR-221-3p	2269.82	1235.67	0.8571	8.52e-05	0.0035266	NM_146169.2	232164	Paip2b	transcript	8.94612	8.43108	0.0855459	0.00119144	0.0329033
mmu-miR-200a-3p	143.74	23.9782	1.9969	0.00056829	0.015685	NM_146169.2	232164	Paip2b	transcript	8.94612	8.43108	0.0855459	0.00119144	0.0329033
mmu-miR-3470b	336.04	56.7948	2.1526	1.98e-05	0.0013662	NM_146169.2	232164	Paip2b	transcript	8.94612	8.43108	0.0855459	0.00119144	0.0329033
mmu-miR-365-2-5p	8.11913	1.17918	1.9254	0.0018939	0.035639	NM_146169.2	232164	Paip2b	transcript	8.94612	8.43108	0.0855459	0.00119144	0.0329033
mmu-miR-466i-5p	352.593	42.1158	2.344	5.49e-05	0.00284	NM_145562.2	231440	Parm1	transcript	37.5905	24.2018	0.635253	0.00139782	0.0352728
mmu-miR-29b-2-5p	32.6134	115.312	-1.5205	0.0011706	0.026507	NM_145562.2	231440	Parm1	transcript	37.5905	24.2018	0.635253	0.00139782	0.0352728
mmu-miR-208a-5p	1.68468	98.5205	-4.8306	5.8e-20	1.2e-17	NM_145562.2	231440	Parm1	transcript	37.5905	24.2018	0.635253	0.00139782	0.0352728
mmu-miR-200a-3p	143.74	23.9782	1.9969	0.00056829	0.015685	NM_145562.2	231440	Parm1	transcript	37.5905	24.2018	0.635253	0.00139782	0.0352728
mmu-miR-3470b	336.04	56.7948	2.1526	1.98e-05	0.0013662	NM_145562.2	231440	Parm1	transcript	37.5905	24.2018	0.635253	0.00139782	0.0352728
mmu-miR-466i-5p	352.593	42.1158	2.344	5.49e-05	0.00284	NM_172635.3	225929	Patl1	transcript	2.3584	0.30042	2.97276	0.00236898	0.0462393
mmu-miR-29b-2-5p	32.6134	115.312	-1.5205	0.0011706	0.026507	NM_172635.3	225929	Patl1	transcript	2.3584	0.30042	2.97276	0.00236898	0.0462393
mmu-miR-214-5p	271.213	165.169	0.69303	6.26e-05	0.0028804	NM_172635.3	225929	Patl1	transcript	2.3584	0.30042	2.97276	0.00236898	0.0462393
mmu-miR-221-3p	2269.82	1235.67	0.8571	8.52e-05	0.0035266	NM_172635.3	225929	Patl1	transcript	2.3584	0.30042	2.97276	0.00236898	0.0462393
mmu-miR-3470b	336.04	56.7948	2.1526	1.98e-05	0.0013662	NM_172635.3	225929	Patl1	transcript	2.3584	0.30042	2.97276	0.00236898	0.0462393
mmu-miR-874-3p	67.1603	160.155	-1.1385	0.0024216	0.042104	NM_025557.1	66425	Pcp4l1	transcript	16.3196	50.2128	-1.62145	0.000300043	0.0276354
mmu-miR-214-5p	271.213	165.169	0.69303	6.26e-05	0.0028804	NM_025557.1	66425	Pcp4l1	transcript	16.3196	50.2128	-1.62145	0.000300043	0.0276354
mmu-miR-3470b	336.04	56.7948	2.1526	1.98e-05	0.0013662	NM_025557.1	66425	Pcp4l1	transcript	16.3196	50.2128	-1.62145	0.000300043	0.0276354
mmu-miR-200b-3p	90.9629	28.7971	1.6296	1.15e-10	1.59e-08	XM_036165926.1	18575	Pde1c	transcript	2.25441	0.005907	8.57611	0.000698786	0.0276354
mmu-miR-874-3p	67.1603	160.155	-1.1385	0.0024216	0.042104	XM_036165926.1	18575	Pde1c	transcript	2.25441	0.005907	8.57611	0.000698786	0.0276354
mmu-miR-466i-5p	352.593	42.1158	2.344	5.49e-05	0.00284	XM_036165926.1	18575	Pde1c	transcript	2.25441	0.005907	8.57611	0.000698786	0.0276354
mmu-miR-365-1-5p	42.0397	9.35359	1.749	0.00085832	0.022209	XM_036165926.1	18575	Pde1c	transcript	2.25441	0.005907	8.57611	0.000698786	0.0276354
mmu-miR-29b-2-5p	32.6134	115.312	-1.5205	0.0011706	0.026507	XM_036165926.1	18575	Pde1c	transcript	2.25441	0.005907	8.57611	0.000698786	0.0276354
mmu-miR-208a-5p	1.68468	98.5205	-4.8306	5.8e-20	1.2e-17	XM_036165926.1	18575	Pde1c	transcript	2.25441	0.005907	8.57611	0.000698786	0.0276354
mmu-miR-200a-3p	143.74	23.9782	1.9969	0.00056829	0.015685	XM_036165926.1	18575	Pde1c	transcript	2.25441	0.005907	8.57611	0.000698786	0.0276354
mmu-miR-365-2-5p	8.11913	1.17918	1.9254	0.0018939	0.035639	XM_036165926.1	18575	Pde1c	transcript	2.25441	0.005907	8.57611	0.000698786	0.0276354
mmu-miR-467a-5p	101.062	157.027	-0.63987	0.0013446	0.026507	XM_036165926.1	18575	Pde1c	transcript	2.25441	0.005907	8.57611	0.000698786	0.0276354
mmu-miR-200b-3p	90.9629	28.7971	1.6296	1.15e-10	1.59e-08	NM_001289702.1	83679	Pde4dip	transcript	26.0448	32.6548	-0.326299	0.00157065	0.0372453
mmu-miR-466i-5p	352.593	42.1158	2.344	5.49e-05	0.00284	NM_001289702.1	83679	Pde4dip	transcript	26.0448	32.6548	-0.326299	0.00157065	0.0372453
mmu-miR-365-1-5p	42.0397	9.35359	1.749	0.00085832	0.022209	NM_001289702.1	83679	Pde4dip	transcript	26.0448	32.6548	-0.326299	0.00157065	0.0372453
mmu-miR-29b-2-5p	32.6134	115.312	-1.5205	0.0011706	0.026507	NM_001289702.1	83679	Pde4dip	transcript	26.0448	32.6548	-0.326299	0.00157065	0.0372453
mmu-miR-214-3p	866.854	544.158	0.66229	0.00013468	0.0046466	NM_001289702.1	83679	Pde4dip	transcript	26.0448	32.6548	-0.326299	0.00157065	0.0372453
mmu-miR-467b-5p	101.062	157.027	-0.63987	0.0013446	0.026507	NM_001289702.1	83679	Pde4dip	transcript	26.0448	32.6548	-0.326299	0.00157065	0.0372453
mmu-miR-193b-3p	657.266	247.533	1.3911	4.18e-26	1.73e-23	NM_001289702.1	83679	Pde4dip	transcript	26.0448	32.6548	-0.326299	0.00157065	0.0372453
mmu-miR-214-5p	271.213	165.169	0.69303	6.26e-05	0.0028804	NM_001289702.1	83679	Pde4dip	transcript	26.0448	32.6548	-0.326299	0.00157065	0.0372453
mmu-miR-200a-3p	143.74	23.9782	1.9969	0.00056829	0.015685	NM_001289702.1	83679	Pde4dip	transcript	26.0448	32.6548	-0.326299	0.00157065	0.0372453
mmu-miR-3470b	336.04	56.7948	2.1526	1.98e-05	0.0013662	NM_001289702.1	83679	Pde4dip	transcript	26.0448	32.6548	-0.326299	0.00157065	0.0372453
mmu-miR-146a-5p	1144.77	2572.83	-1.0815	0.0024408	0.042104	NM_001289702.1	83679	Pde4dip	transcript	26.0448	32.6548	-0.326299	0.00157065	0.0372453
mmu-miR-208a-3p	19.6731	144.716	-2.1853	0.00010883	0.0040958	NM_001289702.1	83679	Pde4dip	transcript	26.0448	32.6548	-0.326299	0.00157065	0.0372453
mmu-miR-365-2-5p	8.11913	1.17918	1.9254	0.0018939	0.035639	NM_001289702.1	83679	Pde4dip	transcript	26.0448	32.6548	-0.326299	0.00157065	0.0372453
mmu-miR-874-3p	67.1603	160.155	-1.1385	0.0024216	0.042104	XM_011239446.4	228026	Pdk1	transcript	3.2763	0	Inf	0.000820671	0.0276354
mmu-miR-466i-5p	352.593	42.1158	2.344	5.49e-05	0.00284	XM_011239446.4	228026	Pdk1	transcript	3.2763	0	Inf	0.000820671	0.0276354
mmu-miR-214-3p	866.854	544.158	0.66229	0.00013468	0.0046466	XM_011239446.4	228026	Pdk1	transcript	3.2763	0	Inf	0.000820671	0.0276354
mmu-miR-467b-5p	101.062	157.027	-0.63987	0.0013446	0.026507	XM_011239446.4	228026	Pdk1	transcript	3.2763	0	Inf	0.000820671	0.0276354
mmu-miR-1983	29.9641	89.2893	-1.379	0.00016096	0.0051261	XM_011239446.4	228026	Pdk1	transcript	3.2763	0	Inf	0.000820671	0.0276354
mmu-miR-3470b	336.04	56.7948	2.1526	1.98e-05	0.0013662	XM_011239446.4	228026	Pdk1	transcript	3.2763	0	Inf	0.000820671	0.0276354
mmu-miR-466i-5p	352.593	42.1158	2.344	5.49e-05	0.00284	NM_133667.2	18604	Pdk2	transcript	107.251	104.968	0.0310432	0.00059324	0.0276354
novel_1	13879.1	1929.61	2.0063	0.0013125	0.026507	NM_133667.2	18604	Pdk2	transcript	107.251	104.968	0.0310432	0.00059324	0.0276354
mmu-miR-874-3p	67.1603	160.155	-1.1385	0.0024216	0.042104	NM_001024606.2	382051	Pdp2	transcript	3.49019	6.43953	-0.883649	0.00130674	0.0342571
mmu-miR-466i-5p	352.593	42.1158	2.344	5.49e-05	0.00284	NM_001024606.2	382051	Pdp2	transcript	3.49019	6.43953	-0.883649	0.00130674	0.0342571
mmu-miR-208a-5p	1.68468	98.5205	-4.8306	5.8e-20	1.2e-17	NM_001024606.2	382051	Pdp2	transcript	3.49019	6.43953	-0.883649	0.00130674	0.0342571
mmu-miR-200a-3p	143.74	23.9782	1.9969	0.00056829	0.015685	NM_001024606.2	382051	Pdp2	transcript	3.49019	6.43953	-0.883649	0.00130674	0.0342571
mmu-miR-100-5p	11740	27586.4	-1.185	7.37e-06	0.00060997	NM_001024606.2	382051	Pdp2	transcript	3.49019	6.43953	-0.883649	0.00130674	0.0342571
mmu-miR-467a-5p	101.062	157.027	-0.63987	0.0013446	0.026507	NM_001024606.2	382051	Pdp2	transcript	3.49019	6.43953	-0.883649	0.00130674	0.0342571
mmu-miR-466i-5p	352.593	42.1158	2.344	5.49e-05	0.00284	XM_030249575.2	18607	Pdpk1	transcript	3.59523	0	Inf	2.05e-05	0.0155632
mmu-miR-29b-2-5p	32.6134	115.312	-1.5205	0.0011706	0.026507	XM_030249575.2	18607	Pdpk1	transcript	3.59523	0	Inf	2.05e-05	0.0155632
mmu-miR-214-3p	866.854	544.158	0.66229	0.00013468	0.0046466	XM_030249575.2	18607	Pdpk1	transcript	3.59523	0	Inf	2.05e-05	0.0155632
mmu-miR-1983	29.9641	89.2893	-1.379	0.00016096	0.0051261	XM_030249575.2	18607	Pdpk1	transcript	3.59523	0	Inf	2.05e-05	0.0155632
mmu-miR-3470b	336.04	56.7948	2.1526	1.98e-05	0.0013662	XM_030249575.2	18607	Pdpk1	transcript	3.59523	0	Inf	2.05e-05	0.0155632
mmu-miR-200b-3p	90.9629	28.7971	1.6296	1.15e-10	1.59e-08	XM_036154088.1	319518	Pdpr	transcript	1.61977	3.72043	-1.19968	0.000122455	0.0276354
mmu-miR-874-3p	67.1603	160.155	-1.1385	0.0024216	0.042104	XM_036154088.1	319518	Pdpr	transcript	1.61977	3.72043	-1.19968	0.000122455	0.0276354
mmu-miR-690	1195.04	385.602	1.4425	0.0010865	0.02646	XM_036154088.1	319518	Pdpr	transcript	1.61977	3.72043	-1.19968	0.000122455	0.0276354
mmu-miR-214-3p	866.854	544.158	0.66229	0.00013468	0.0046466	XM_036154088.1	319518	Pdpr	transcript	1.61977	3.72043	-1.19968	0.000122455	0.0276354
mmu-miR-200a-3p	143.74	23.9782	1.9969	0.00056829	0.015685	XM_036154088.1	319518	Pdpr	transcript	1.61977	3.72043	-1.19968	0.000122455	0.0276354
mmu-miR-214-3p	866.854	544.158	0.66229	0.00013468	0.0046466	NM_022032.4	64058	Perp	transcript	119.731	36.8542	1.6999	0.00103486	0.0304533
mmu-miR-200a-3p	143.74	23.9782	1.9969	0.00056829	0.015685	NM_022032.4	64058	Perp	transcript	119.731	36.8542	1.6999	0.00103486	0.0304533
mmu-miR-466i-5p	352.593	42.1158	2.344	5.49e-05	0.00284	NM_011069.3	18632	Pex11b	transcript	2.55805	3.0223	-0.240602	0.00161238	0.037419
mmu-miR-208a-5p	1.68468	98.5205	-4.8306	5.8e-20	1.2e-17	NM_011069.3	18632	Pex11b	transcript	2.55805	3.0223	-0.240602	0.00161238	0.037419
mmu-miR-221-3p	2269.82	1235.67	0.8571	8.52e-05	0.0035266	NM_011069.3	18632	Pex11b	transcript	2.55805	3.0223	-0.240602	0.00161238	0.037419
mmu-miR-5126	30.4974	5.65546	2.0107	5.18e-05	0.00284	NM_027044.3	56612	Pfdn5	transcript	62.793	47.0569	0.416198	0.00093278	0.0292165
mmu-miR-200a-3p	143.74	23.9782	1.9969	0.00056829	0.015685	NM_027044.3	56612	Pfdn5	transcript	62.793	47.0569	0.416198	0.00093278	0.0292165
mmu-miR-3470b	336.04	56.7948	2.1526	1.98e-05	0.0013662	NM_027044.3	56612	Pfdn5	transcript	62.793	47.0569	0.416198	0.00093278	0.0292165
mmu-miR-146a-5p	1144.77	2572.83	-1.0815	0.0024408	0.042104	NM_027044.3	56612	Pfdn5	transcript	62.793	47.0569	0.416198	0.00093278	0.0292165
mmu-miR-214-3p	866.854	544.158	0.66229	0.00013468	0.0046466	NM_010385.2	14976	Pfdn6	transcript	13.2552	17.8863	-0.4323	0.00108699	0.0314517
mmu-miR-146a-5p	1144.77	2572.83	-1.0815	0.0024408	0.042104	NM_010385.2	14976	Pfdn6	transcript	13.2552	17.8863	-0.4323	0.00108699	0.0314517
mmu-miR-214-3p	866.854	544.158	0.66229	0.00013468	0.0046466	NM_008828.3	18655	Pgk1	transcript	83.217	79.3525	0.068602	0.00229255	0.0452466
mmu-miR-221-3p	2269.82	1235.67	0.8571	8.52e-05	0.0035266	NM_008828.3	18655	Pgk1	transcript	83.217	79.3525	0.068602	0.00229255	0.0452466
mmu-miR-200b-3p	90.9629	28.7971	1.6296	1.15e-10	1.59e-08	NM_027558.1	70804	Pgrmc2	transcript	13.5548	8.47909	0.676825	0.000359363	0.0276354
mmu-miR-29b-2-5p	32.6134	115.312	-1.5205	0.0011706	0.026507	NM_027558.1	70804	Pgrmc2	transcript	13.5548	8.47909	0.676825	0.000359363	0.0276354
mmu-miR-214-3p	866.854	544.158	0.66229	0.00013468	0.0046466	NM_027558.1	70804	Pgrmc2	transcript	13.5548	8.47909	0.676825	0.000359363	0.0276354
mmu-miR-1983	29.9641	89.2893	-1.379	0.00016096	0.0051261	NM_027558.1	70804	Pgrmc2	transcript	13.5548	8.47909	0.676825	0.000359363	0.0276354
mmu-miR-200a-3p	143.74	23.9782	1.9969	0.00056829	0.015685	NM_027558.1	70804	Pgrmc2	transcript	13.5548	8.47909	0.676825	0.000359363	0.0276354
mmu-miR-200b-3p	90.9629	28.7971	1.6296	1.15e-10	1.59e-08	TCONS_00014613	215789	Phactr2	transcript	4.49565	2.20851	1.02546	0.000322798	0.0276354
mmu-miR-365-1-5p	42.0397	9.35359	1.749	0.00085832	0.022209	TCONS_00014613	215789	Phactr2	transcript	4.49565	2.20851	1.02546	0.000322798	0.0276354
mmu-miR-690	1195.04	385.602	1.4425	0.0010865	0.02646	TCONS_00014613	215789	Phactr2	transcript	4.49565	2.20851	1.02546	0.000322798	0.0276354
novel_1	13879.1	1929.61	2.0063	0.0013125	0.026507	TCONS_00014613	215789	Phactr2	transcript	4.49565	2.20851	1.02546	0.000322798	0.0276354
mmu-miR-200a-3p	143.74	23.9782	1.9969	0.00056829	0.015685	TCONS_00014613	215789	Phactr2	transcript	4.49565	2.20851	1.02546	0.000322798	0.0276354
mmu-miR-146a-5p	1144.77	2572.83	-1.0815	0.0024408	0.042104	TCONS_00014613	215789	Phactr2	transcript	4.49565	2.20851	1.02546	0.000322798	0.0276354
mmu-miR-365-2-5p	8.11913	1.17918	1.9254	0.0018939	0.035639	TCONS_00014613	215789	Phactr2	transcript	4.49565	2.20851	1.02546	0.000322798	0.0276354
mmu-miR-214-3p	866.854	544.158	0.66229	0.00013468	0.0046466	XM_011246234.2	106522	Pkdcc	transcript	0.975937	0	Inf	0.000820671	0.0276354
mmu-miR-208a-5p	1.68468	98.5205	-4.8306	5.8e-20	1.2e-17	XM_011246234.2	106522	Pkdcc	transcript	0.975937	0	Inf	0.000820671	0.0276354
mmu-miR-221-3p	2269.82	1235.67	0.8571	8.52e-05	0.0035266	XM_011246234.2	106522	Pkdcc	transcript	0.975937	0	Inf	0.000820671	0.0276354
mmu-miR-3470b	336.04	56.7948	2.1526	1.98e-05	0.0013662	XM_011246234.2	106522	Pkdcc	transcript	0.975937	0	Inf	0.000820671	0.0276354
mmu-miR-146a-5p	1144.77	2572.83	-1.0815	0.0024408	0.042104	NM_026163.2	67451	Pkp2	transcript	49.1402	34.495	0.510519	0.000127578	0.0276354
mmu-miR-466i-5p	352.593	42.1158	2.344	5.49e-05	0.00284	NM_009088.3	20019	Polr1a	transcript	5.17423	7.65806	-0.565635	0.000892474	0.0287892
mmu-miR-690	1195.04	385.602	1.4425	0.0010865	0.02646	NM_009088.3	20019	Polr1a	transcript	5.17423	7.65806	-0.565635	0.000892474	0.0287892
mmu-miR-214-3p	866.854	544.158	0.66229	0.00013468	0.0046466	NM_009088.3	20019	Polr1a	transcript	5.17423	7.65806	-0.565635	0.000892474	0.0287892
mmu-miR-208a-5p	1.68468	98.5205	-4.8306	5.8e-20	1.2e-17	NM_009088.3	20019	Polr1a	transcript	5.17423	7.65806	-0.565635	0.000892474	0.0287892
mmu-miR-214-5p	271.213	165.169	0.69303	6.26e-05	0.0028804	NM_009088.3	20019	Polr1a	transcript	5.17423	7.65806	-0.565635	0.000892474	0.0287892
mmu-miR-6538	304.502	74.5948	1.8593	7.2e-07	7.45e-05	NM_009088.3	20019	Polr1a	transcript	5.17423	7.65806	-0.565635	0.000892474	0.0287892
novel_1	13879.1	1929.61	2.0063	0.0013125	0.026507	NM_009088.3	20019	Polr1a	transcript	5.17423	7.65806	-0.565635	0.000892474	0.0287892
mmu-miR-3470b	336.04	56.7948	2.1526	1.98e-05	0.0013662	NM_009088.3	20019	Polr1a	transcript	5.17423	7.65806	-0.565635	0.000892474	0.0287892
mmu-miR-146a-5p	1144.77	2572.83	-1.0815	0.0024408	0.042104	NM_009088.3	20019	Polr1a	transcript	5.17423	7.65806	-0.565635	0.000892474	0.0287892
mmu-miR-874-3p	67.1603	160.155	-1.1385	0.0024216	0.042104	NM_011293.2	20022	Polr2j	transcript	13.2814	15.4381	-0.217088	0.000690938	0.0276354
mmu-miR-214-3p	866.854	544.158	0.66229	0.00013468	0.0046466	NM_011293.2	20022	Polr2j	transcript	13.2814	15.4381	-0.217088	0.000690938	0.0276354
mmu-miR-200a-3p	143.74	23.9782	1.9969	0.00056829	0.015685	NM_011293.2	20022	Polr2j	transcript	13.2814	15.4381	-0.217088	0.000690938	0.0276354
mmu-miR-467a-5p	101.062	157.027	-0.63987	0.0013446	0.026507	XM_036163366.1	74776	Ppa2	transcript	1.37645	7.04429	-2.35551	0.00138225	0.0351828
mmu-miR-200b-3p	90.9629	28.7971	1.6296	1.15e-10	1.59e-08	XM_011246321.3	19043	Ppm1b	transcript	0.886711	0	Inf	0.000820671	0.0276354
mmu-miR-29b-2-5p	32.6134	115.312	-1.5205	0.0011706	0.026507	XM_011246321.3	19043	Ppm1b	transcript	0.886711	0	Inf	0.000820671	0.0276354
mmu-miR-208a-5p	1.68468	98.5205	-4.8306	5.8e-20	1.2e-17	XM_011246321.3	19043	Ppm1b	transcript	0.886711	0	Inf	0.000820671	0.0276354
mmu-miR-3470b	336.04	56.7948	2.1526	1.98e-05	0.0013662	XM_011246321.3	19043	Ppm1b	transcript	0.886711	0	Inf	0.000820671	0.0276354
mmu-miR-200b-3p	90.9629	28.7971	1.6296	1.15e-10	1.59e-08	NM_175523.5	243382	Ppm1k	transcript	41.3824	25.3879	0.704875	0.000348613	0.0276354
mmu-miR-29b-2-5p	32.6134	115.312	-1.5205	0.0011706	0.026507	NM_175523.5	243382	Ppm1k	transcript	41.3824	25.3879	0.704875	0.000348613	0.0276354
mmu-miR-214-3p	866.854	544.158	0.66229	0.00013468	0.0046466	NM_175523.5	243382	Ppm1k	transcript	41.3824	25.3879	0.704875	0.000348613	0.0276354
mmu-miR-208a-5p	1.68468	98.5205	-4.8306	5.8e-20	1.2e-17	NM_175523.5	243382	Ppm1k	transcript	41.3824	25.3879	0.704875	0.000348613	0.0276354
mmu-miR-193b-3p	657.266	247.533	1.3911	4.18e-26	1.73e-23	NM_175523.5	243382	Ppm1k	transcript	41.3824	25.3879	0.704875	0.000348613	0.0276354
mmu-miR-221-3p	2269.82	1235.67	0.8571	8.52e-05	0.0035266	NM_175523.5	243382	Ppm1k	transcript	41.3824	25.3879	0.704875	0.000348613	0.0276354
mmu-miR-146a-5p	1144.77	2572.83	-1.0815	0.0024408	0.042104	NM_175523.5	243382	Ppm1k	transcript	41.3824	25.3879	0.704875	0.000348613	0.0276354
mmu-miR-365-1-5p	42.0397	9.35359	1.749	0.00085832	0.022209	NM_001010836.3	333654	Ppp1r13l	transcript	14.5252	7.5781	0.938653	0.00264122	0.0491363
mmu-miR-6538	304.502	74.5948	1.8593	7.2e-07	7.45e-05	NM_001010836.3	333654	Ppp1r13l	transcript	14.5252	7.5781	0.938653	0.00264122	0.0491363
novel_1	13879.1	1929.61	2.0063	0.0013125	0.026507	NM_001010836.3	333654	Ppp1r13l	transcript	14.5252	7.5781	0.938653	0.00264122	0.0491363
mmu-miR-365-2-5p	8.11913	1.17918	1.9254	0.0018939	0.035639	NM_001010836.3	333654	Ppp1r13l	transcript	14.5252	7.5781	0.938653	0.00264122	0.0491363
mmu-miR-874-3p	67.1603	160.155	-1.1385	0.0024216	0.042104	XM_006515925.4	26932	Ppp2r5e	transcript	1.17794	0.258766	2.18654	0.000952025	0.0296311
mmu-miR-214-3p	866.854	544.158	0.66229	0.00013468	0.0046466	XM_006515925.4	26932	Ppp2r5e	transcript	1.17794	0.258766	2.18654	0.000952025	0.0296311
mmu-miR-1983	29.9641	89.2893	-1.379	0.00016096	0.0051261	XM_006515925.4	26932	Ppp2r5e	transcript	1.17794	0.258766	2.18654	0.000952025	0.0296311
mmu-miR-200a-3p	143.74	23.9782	1.9969	0.00056829	0.015685	XM_006515925.4	26932	Ppp2r5e	transcript	1.17794	0.258766	2.18654	0.000952025	0.0296311
mmu-miR-874-3p	67.1603	160.155	-1.1385	0.0024216	0.042104	XM_006518707.3	19056	Ppp3cb	transcript	0.007019	4.54103	-9.33754	0.00110514	0.0316263
mmu-miR-29b-2-5p	32.6134	115.312	-1.5205	0.0011706	0.026507	XM_006518707.3	19056	Ppp3cb	transcript	0.007019	4.54103	-9.33754	0.00110514	0.0316263
mmu-miR-208a-5p	1.68468	98.5205	-4.8306	5.8e-20	1.2e-17	XM_011245729.1	71474	Ppp6r2	transcript	1.37594	0.0181113	6.24738	0.000739368	0.0276354
novel_1	13879.1	1929.61	2.0063	0.0013125	0.026507	XM_011245729.1	71474	Ppp6r2	transcript	1.37594	0.0181113	6.24738	0.000739368	0.0276354
mmu-miR-466i-5p	352.593	42.1158	2.344	5.49e-05	0.00284	TCONS_00001258	116847	Prelp	transcript	1.45639	0	Inf	0.000820671	0.0276354
mmu-miR-214-3p	866.854	544.158	0.66229	0.00013468	0.0046466	TCONS_00001258	116847	Prelp	transcript	1.45639	0	Inf	0.000820671	0.0276354
mmu-miR-1983	29.9641	89.2893	-1.379	0.00016096	0.0051261	TCONS_00001258	116847	Prelp	transcript	1.45639	0	Inf	0.000820671	0.0276354
mmu-miR-200b-3p	90.9629	28.7971	1.6296	1.15e-10	1.59e-08	XM_036162790.1	19130	Prox1	transcript	1.35014	0.000200667	12.716	2.04e-05	0.0155632
mmu-miR-466i-5p	352.593	42.1158	2.344	5.49e-05	0.00284	XM_036162790.1	19130	Prox1	transcript	1.35014	0.000200667	12.716	2.04e-05	0.0155632
mmu-miR-365-1-5p	42.0397	9.35359	1.749	0.00085832	0.022209	XM_036162790.1	19130	Prox1	transcript	1.35014	0.000200667	12.716	2.04e-05	0.0155632
mmu-miR-214-3p	866.854	544.158	0.66229	0.00013468	0.0046466	XM_036162790.1	19130	Prox1	transcript	1.35014	0.000200667	12.716	2.04e-05	0.0155632
mmu-miR-200a-3p	143.74	23.9782	1.9969	0.00056829	0.015685	XM_036162790.1	19130	Prox1	transcript	1.35014	0.000200667	12.716	2.04e-05	0.0155632
mmu-miR-100-5p	11740	27586.4	-1.185	7.37e-06	0.00060997	XM_036162790.1	19130	Prox1	transcript	1.35014	0.000200667	12.716	2.04e-05	0.0155632
mmu-miR-3470b	336.04	56.7948	2.1526	1.98e-05	0.0013662	XM_036162790.1	19130	Prox1	transcript	1.35014	0.000200667	12.716	2.04e-05	0.0155632
mmu-miR-146a-5p	1144.77	2572.83	-1.0815	0.0024408	0.042104	XM_036162790.1	19130	Prox1	transcript	1.35014	0.000200667	12.716	2.04e-05	0.0155632
mmu-miR-365-2-5p	8.11913	1.17918	1.9254	0.0018939	0.035639	XM_036162790.1	19130	Prox1	transcript	1.35014	0.000200667	12.716	2.04e-05	0.0155632
mmu-miR-874-3p	67.1603	160.155	-1.1385	0.0024216	0.042104	NM_011207.2	545622	Ptpn3	transcript	2.85143	0.047324	5.91297	0.000765875	0.0276354
mmu-miR-214-3p	866.854	544.158	0.66229	0.00013468	0.0046466	NM_011207.2	545622	Ptpn3	transcript	2.85143	0.047324	5.91297	0.000765875	0.0276354
mmu-miR-208a-5p	1.68468	98.5205	-4.8306	5.8e-20	1.2e-17	NM_011207.2	545622	Ptpn3	transcript	2.85143	0.047324	5.91297	0.000765875	0.0276354
novel_1	13879.1	1929.61	2.0063	0.0013125	0.026507	NM_011207.2	545622	Ptpn3	transcript	2.85143	0.047324	5.91297	0.000765875	0.0276354
mmu-miR-1983	29.9641	89.2893	-1.379	0.00016096	0.0051261	NM_011207.2	545622	Ptpn3	transcript	2.85143	0.047324	5.91297	0.000765875	0.0276354
mmu-miR-200a-3p	143.74	23.9782	1.9969	0.00056829	0.015685	NM_011207.2	545622	Ptpn3	transcript	2.85143	0.047324	5.91297	0.000765875	0.0276354
mmu-miR-467a-5p	101.062	157.027	-0.63987	0.0013446	0.026507	NM_011207.2	545622	Ptpn3	transcript	2.85143	0.047324	5.91297	0.000765875	0.0276354
mmu-miR-466i-5p	352.593	42.1158	2.344	5.49e-05	0.00284	TCONS_00023376	19290	Pura	transcript	2.15409	0.008678	7.9555	0.00096005	0.0297987
mmu-miR-29b-2-5p	32.6134	115.312	-1.5205	0.0011706	0.026507	TCONS_00023376	19290	Pura	transcript	2.15409	0.008678	7.9555	0.00096005	0.0297987
mmu-miR-214-3p	866.854	544.158	0.66229	0.00013468	0.0046466	TCONS_00023376	19290	Pura	transcript	2.15409	0.008678	7.9555	0.00096005	0.0297987
mmu-miR-221-3p	2269.82	1235.67	0.8571	8.52e-05	0.0035266	TCONS_00023376	19290	Pura	transcript	2.15409	0.008678	7.9555	0.00096005	0.0297987
mmu-miR-200a-3p	143.74	23.9782	1.9969	0.00056829	0.015685	TCONS_00023376	19290	Pura	transcript	2.15409	0.008678	7.9555	0.00096005	0.0297987
mmu-miR-365-1-5p	42.0397	9.35359	1.749	0.00085832	0.022209	NM_024454.1	216344	Rab21	transcript	0.620409	17.8734	-4.84845	0.000508496	0.0276354
mmu-miR-690	1195.04	385.602	1.4425	0.0010865	0.02646	NM_024454.1	216344	Rab21	transcript	0.620409	17.8734	-4.84845	0.000508496	0.0276354
mmu-miR-214-3p	866.854	544.158	0.66229	0.00013468	0.0046466	NM_024454.1	216344	Rab21	transcript	0.620409	17.8734	-4.84845	0.000508496	0.0276354
mmu-miR-467b-5p	101.062	157.027	-0.63987	0.0013446	0.026507	NM_024454.1	216344	Rab21	transcript	0.620409	17.8734	-4.84845	0.000508496	0.0276354
mmu-miR-200a-3p	143.74	23.9782	1.9969	0.00056829	0.015685	NM_024454.1	216344	Rab21	transcript	0.620409	17.8734	-4.84845	0.000508496	0.0276354
mmu-miR-3470b	336.04	56.7948	2.1526	1.98e-05	0.0013662	NM_024454.1	216344	Rab21	transcript	0.620409	17.8734	-4.84845	0.000508496	0.0276354
mmu-miR-365-2-5p	8.11913	1.17918	1.9254	0.0018939	0.035639	NM_024454.1	216344	Rab21	transcript	0.620409	17.8734	-4.84845	0.000508496	0.0276354
mmu-miR-200b-3p	90.9629	28.7971	1.6296	1.15e-10	1.59e-08	NM_177411.4	19344	Rab5b	transcript	15.3906	17.862	-0.214852	0.000321654	0.0276354
mmu-miR-874-3p	67.1603	160.155	-1.1385	0.0024216	0.042104	NM_177411.4	19344	Rab5b	transcript	15.3906	17.862	-0.214852	0.000321654	0.0276354
mmu-miR-29b-2-5p	32.6134	115.312	-1.5205	0.0011706	0.026507	NM_177411.4	19344	Rab5b	transcript	15.3906	17.862	-0.214852	0.000321654	0.0276354
mmu-miR-690	1195.04	385.602	1.4425	0.0010865	0.02646	NM_177411.4	19344	Rab5b	transcript	15.3906	17.862	-0.214852	0.000321654	0.0276354
mmu-miR-214-3p	866.854	544.158	0.66229	0.00013468	0.0046466	NM_177411.4	19344	Rab5b	transcript	15.3906	17.862	-0.214852	0.000321654	0.0276354
mmu-miR-200a-3p	143.74	23.9782	1.9969	0.00056829	0.015685	NM_177411.4	19344	Rab5b	transcript	15.3906	17.862	-0.214852	0.000321654	0.0276354
mmu-miR-3470b	336.04	56.7948	2.1526	1.98e-05	0.0013662	NM_177411.4	19344	Rab5b	transcript	15.3906	17.862	-0.214852	0.000321654	0.0276354
mmu-miR-146a-5p	1144.77	2572.83	-1.0815	0.0024408	0.042104	NM_177411.4	19344	Rab5b	transcript	15.3906	17.862	-0.214852	0.000321654	0.0276354
mmu-miR-467a-5p	101.062	157.027	-0.63987	0.0013446	0.026507	NM_177411.4	19344	Rab5b	transcript	15.3906	17.862	-0.214852	0.000321654	0.0276354
mmu-miR-214-3p	866.854	544.158	0.66229	0.00013468	0.0046466	XM_036156454.1	19345	Rab5c	transcript	1.04576	0	Inf	0.000756013	0.0276354
mmu-miR-214-5p	271.213	165.169	0.69303	6.26e-05	0.0028804	XM_036156454.1	19345	Rab5c	transcript	1.04576	0	Inf	0.000756013	0.0276354
mmu-miR-208a-3p	19.6731	144.716	-2.1853	0.00010883	0.0040958	XM_036156454.1	19345	Rab5c	transcript	1.04576	0	Inf	0.000756013	0.0276354
mmu-miR-874-3p	67.1603	160.155	-1.1385	0.0024216	0.042104	XM_036161998.1	241694	Ralgapa2	transcript	4.94291	0.169671	4.86455	0.000222044	0.0276354
mmu-miR-466i-5p	352.593	42.1158	2.344	5.49e-05	0.00284	XM_036161998.1	241694	Ralgapa2	transcript	4.94291	0.169671	4.86455	0.000222044	0.0276354
mmu-miR-690	1195.04	385.602	1.4425	0.0010865	0.02646	XM_036161998.1	241694	Ralgapa2	transcript	4.94291	0.169671	4.86455	0.000222044	0.0276354
mmu-miR-214-3p	866.854	544.158	0.66229	0.00013468	0.0046466	XM_036161998.1	241694	Ralgapa2	transcript	4.94291	0.169671	4.86455	0.000222044	0.0276354
mmu-miR-214-5p	271.213	165.169	0.69303	6.26e-05	0.0028804	XM_036161998.1	241694	Ralgapa2	transcript	4.94291	0.169671	4.86455	0.000222044	0.0276354
mmu-miR-1983	29.9641	89.2893	-1.379	0.00016096	0.0051261	XM_036161998.1	241694	Ralgapa2	transcript	4.94291	0.169671	4.86455	0.000222044	0.0276354
mmu-miR-221-3p	2269.82	1235.67	0.8571	8.52e-05	0.0035266	XM_036161998.1	241694	Ralgapa2	transcript	4.94291	0.169671	4.86455	0.000222044	0.0276354
mmu-miR-208a-3p	19.6731	144.716	-2.1853	0.00010883	0.0040958	XM_036161998.1	241694	Ralgapa2	transcript	4.94291	0.169671	4.86455	0.000222044	0.0276354
mmu-miR-467a-5p	101.062	157.027	-0.63987	0.0013446	0.026507	XM_036161998.1	241694	Ralgapa2	transcript	4.94291	0.169671	4.86455	0.000222044	0.0276354
mmu-miR-200b-3p	90.9629	28.7971	1.6296	1.15e-10	1.59e-08	TCONS_00018780	56705	Ranbp9	transcript	4.50464	0	Inf	0.000820671	0.0276354
mmu-miR-29b-2-5p	32.6134	115.312	-1.5205	0.0011706	0.026507	TCONS_00018780	56705	Ranbp9	transcript	4.50464	0	Inf	0.000820671	0.0276354
mmu-miR-214-5p	271.213	165.169	0.69303	6.26e-05	0.0028804	TCONS_00018780	56705	Ranbp9	transcript	4.50464	0	Inf	0.000820671	0.0276354
mmu-miR-221-3p	2269.82	1235.67	0.8571	8.52e-05	0.0035266	TCONS_00018780	56705	Ranbp9	transcript	4.50464	0	Inf	0.000820671	0.0276354
mmu-miR-466i-5p	352.593	42.1158	2.344	5.49e-05	0.00284	NM_029182.1	75141	Rasd2	transcript	5.28095	1.10421	2.25778	0.00103307	0.0304533
mmu-miR-29b-2-5p	32.6134	115.312	-1.5205	0.0011706	0.026507	NM_029182.1	75141	Rasd2	transcript	5.28095	1.10421	2.25778	0.00103307	0.0304533
mmu-miR-214-3p	866.854	544.158	0.66229	0.00013468	0.0046466	NM_029182.1	75141	Rasd2	transcript	5.28095	1.10421	2.25778	0.00103307	0.0304533
mmu-miR-214-3p	866.854	544.158	0.66229	0.00013468	0.0046466	TCONS_00024433	73713	Rbm20	transcript	1.35106	0	Inf	0.000820671	0.0276354
mmu-miR-193b-3p	657.266	247.533	1.3911	4.18e-26	1.73e-23	TCONS_00024433	73713	Rbm20	transcript	1.35106	0	Inf	0.000820671	0.0276354
mmu-miR-3470b	336.04	56.7948	2.1526	1.98e-05	0.0013662	TCONS_00024433	73713	Rbm20	transcript	1.35106	0	Inf	0.000820671	0.0276354
mmu-miR-146a-5p	1144.77	2572.83	-1.0815	0.0024408	0.042104	TCONS_00024433	73713	Rbm20	transcript	1.35106	0	Inf	0.000820671	0.0276354
mmu-miR-200b-3p	90.9629	28.7971	1.6296	1.15e-10	1.59e-08	NM_001310464.1	19699	Reln	transcript	1.91056	0	Inf	9.66e-05	0.0264941
mmu-miR-214-3p	866.854	544.158	0.66229	0.00013468	0.0046466	NM_001310464.1	19699	Reln	transcript	1.91056	0	Inf	9.66e-05	0.0264941
novel_1	13879.1	1929.61	2.0063	0.0013125	0.026507	NM_001310464.1	19699	Reln	transcript	1.91056	0	Inf	9.66e-05	0.0264941
mmu-miR-221-3p	2269.82	1235.67	0.8571	8.52e-05	0.0035266	NM_001310464.1	19699	Reln	transcript	1.91056	0	Inf	9.66e-05	0.0264941
mmu-miR-146a-5p	1144.77	2572.83	-1.0815	0.0024408	0.042104	NM_001310464.1	19699	Reln	transcript	1.91056	0	Inf	9.66e-05	0.0264941
mmu-miR-466i-5p	352.593	42.1158	2.344	5.49e-05	0.00284	NM_001252638.1	69288	Rhobtb1	transcript	0.0385657	2.18074	-5.82136	0.00249007	0.0476339
mmu-miR-214-3p	866.854	544.158	0.66229	0.00013468	0.0046466	NM_001252638.1	69288	Rhobtb1	transcript	0.0385657	2.18074	-5.82136	0.00249007	0.0476339
mmu-miR-208a-5p	1.68468	98.5205	-4.8306	5.8e-20	1.2e-17	NM_001252638.1	69288	Rhobtb1	transcript	0.0385657	2.18074	-5.82136	0.00249007	0.0476339
mmu-miR-200a-3p	143.74	23.9782	1.9969	0.00056829	0.015685	NM_001252638.1	69288	Rhobtb1	transcript	0.0385657	2.18074	-5.82136	0.00249007	0.0476339
mmu-miR-146a-5p	1144.77	2572.83	-1.0815	0.0024408	0.042104	NM_001252638.1	69288	Rhobtb1	transcript	0.0385657	2.18074	-5.82136	0.00249007	0.0476339
mmu-miR-690	1195.04	385.602	1.4425	0.0010865	0.02646	NM_007484.2	11853	Rhoc	transcript	11.9737	15.2374	-0.347749	0.0005552	0.0276354
mmu-miR-466i-5p	352.593	42.1158	2.344	5.49e-05	0.00284	NM_145491.2	104215	Rhoq	transcript	24.8375	23.9311	0.0536339	0.00220291	0.0438905
mmu-miR-467b-5p	101.062	157.027	-0.63987	0.0013446	0.026507	NM_145491.2	104215	Rhoq	transcript	24.8375	23.9311	0.0536339	0.00220291	0.0438905
mmu-miR-3470b	336.04	56.7948	2.1526	1.98e-05	0.0013662	NM_145491.2	104215	Rhoq	transcript	24.8375	23.9311	0.0536339	0.00220291	0.0438905
mmu-miR-214-3p	866.854	544.158	0.66229	0.00013468	0.0046466	NM_024288.2	68477	Rmnd5a	transcript	14.9293	15.4847	-0.0526959	0.000690882	0.0276354
mmu-miR-221-3p	2269.82	1235.67	0.8571	8.52e-05	0.0035266	NM_024288.2	68477	Rmnd5a	transcript	14.9293	15.4847	-0.0526959	0.000690882	0.0276354
mmu-miR-200a-3p	143.74	23.9782	1.9969	0.00056829	0.015685	NM_024288.2	68477	Rmnd5a	transcript	14.9293	15.4847	-0.0526959	0.000690882	0.0276354
mmu-miR-3470b	336.04	56.7948	2.1526	1.98e-05	0.0013662	NM_024288.2	68477	Rmnd5a	transcript	14.9293	15.4847	-0.0526959	0.000690882	0.0276354
mmu-miR-214-3p	866.854	544.158	0.66229	0.00013468	0.0046466	XM_036155419.1	84585	Rnf123	transcript	0.992394	0.075402	3.71824	0.00019691	0.0276354
mmu-miR-29b-2-5p	32.6134	115.312	-1.5205	0.0011706	0.026507	NM_027859.3	71673	Rnf215	transcript	2.26533	2.64791	-0.22513	0.00109052	0.0314747
mmu-miR-214-3p	866.854	544.158	0.66229	0.00013468	0.0046466	NM_027859.3	71673	Rnf215	transcript	2.26533	2.64791	-0.22513	0.00109052	0.0314747
mmu-miR-200a-3p	143.74	23.9782	1.9969	0.00056829	0.015685	NM_027859.3	71673	Rnf215	transcript	2.26533	2.64791	-0.22513	0.00109052	0.0314747
mmu-miR-466i-5p	352.593	42.1158	2.344	5.49e-05	0.00284	NM_027371.3	70285	Rpf1	transcript	3.43126	4.49513	-0.389626	0.00256948	0.0483411
mmu-miR-1983	29.9641	89.2893	-1.379	0.00016096	0.0051261	NM_027371.3	70285	Rpf1	transcript	3.43126	4.49513	-0.389626	0.00256948	0.0483411
mmu-miR-200a-3p	143.74	23.9782	1.9969	0.00056829	0.015685	NM_027371.3	70285	Rpf1	transcript	3.43126	4.49513	-0.389626	0.00256948	0.0483411
mmu-miR-3470b	336.04	56.7948	2.1526	1.98e-05	0.0013662	NM_027371.3	70285	Rpf1	transcript	3.43126	4.49513	-0.389626	0.00256948	0.0483411
mmu-miR-146a-5p	1144.77	2572.83	-1.0815	0.0024408	0.042104	NM_027371.3	70285	Rpf1	transcript	3.43126	4.49513	-0.389626	0.00256948	0.0483411
mmu-miR-466i-5p	352.593	42.1158	2.344	5.49e-05	0.00284	TCONS_00012153	76808	Rpl18a	transcript	32.7855	0	Inf	2.77e-05	0.0155632
mmu-miR-214-3p	866.854	544.158	0.66229	0.00013468	0.0046466	TCONS_00012153	76808	Rpl18a	transcript	32.7855	0	Inf	2.77e-05	0.0155632
mmu-miR-467b-5p	101.062	157.027	-0.63987	0.0013446	0.026507	TCONS_00012153	76808	Rpl18a	transcript	32.7855	0	Inf	2.77e-05	0.0155632
mmu-miR-467a-5p	101.062	157.027	-0.63987	0.0013446	0.026507	TCONS_00012153	76808	Rpl18a	transcript	32.7855	0	Inf	2.77e-05	0.0155632
mmu-miR-874-3p	67.1603	160.155	-1.1385	0.0024216	0.042104	NM_022891.3	65019	Rpl23	transcript	63.7671	68.7937	-0.109465	0.00161807	0.037419
mmu-miR-3470b	336.04	56.7948	2.1526	1.98e-05	0.0013662	NM_022891.3	65019	Rpl23	transcript	63.7671	68.7937	-0.109465	0.00161807	0.037419
mmu-miR-3470b	336.04	56.7948	2.1526	1.98e-05	0.0013662	NM_009081.2	19943	Rpl28	transcript	136.391	155.972	-0.193547	0.00184142	0.0400109
mmu-miR-1983	29.9641	89.2893	-1.379	0.00016096	0.0051261	NM_001005859.3	68436	Rpl34	transcript	49.1836	52.577	-0.0962555	0.00245323	0.0472431
mmu-miR-200a-3p	143.74	23.9782	1.9969	0.00056829	0.015685	NM_001005859.3	68436	Rpl34	transcript	49.1836	52.577	-0.0962555	0.00245323	0.0472431
mmu-miR-208a-5p	1.68468	98.5205	-4.8306	5.8e-20	1.2e-17	NM_019865.5	19982	Rpl36a	transcript	50.1394	60.2687	-0.265463	0.001709	0.0383222
mmu-miR-193b-3p	657.266	247.533	1.3911	4.18e-26	1.73e-23	NM_001355384.1	54127	Rps28	transcript	82.2397	102.078	-0.31177	0.000255705	0.0276354
mmu-miR-3470b	336.04	56.7948	2.1526	1.98e-05	0.0013662	NM_029767.2	76846	Rps9	transcript	190.361	173.314	0.135351	0.000509211	0.0276354
mmu-miR-208a-5p	1.68468	98.5205	-4.8306	5.8e-20	1.2e-17	NM_011029.4	16785	Rpsa	transcript	94.6625	73.0271	0.37436	0.00172513	0.0384836
mmu-miR-214-3p	866.854	544.158	0.66229	0.00013468	0.0046466	NM_001360132.1	20130	Rras	transcript	1.46932	0	Inf	0.000820671	0.0276354
mmu-miR-6538	304.502	74.5948	1.8593	7.2e-07	7.45e-05	XM_006513338.4	18114	Rrp1	transcript	1.64072	0.037586	5.44799	0.000369644	0.0276354
mmu-miR-3470b	336.04	56.7948	2.1526	1.98e-05	0.0013662	XM_006513338.4	18114	Rrp1	transcript	1.64072	0.037586	5.44799	0.000369644	0.0276354
mmu-miR-467a-5p	101.062	157.027	-0.63987	0.0013446	0.026507	XM_006513338.4	18114	Rrp1	transcript	1.64072	0.037586	5.44799	0.000369644	0.0276354
mmu-miR-200b-3p	90.9629	28.7971	1.6296	1.15e-10	1.59e-08	NM_198609.2	225215	Rsl24d1	transcript	11.3542	9.83906	0.206635	0.000118896	0.0276354
mmu-miR-29b-2-5p	32.6134	115.312	-1.5205	0.0011706	0.026507	NM_199468.2	213436	Rtl3	transcript	2.36875	0.177523	3.73804	0.000371092	0.0276354
mmu-miR-29b-2-5p	32.6134	115.312	-1.5205	0.0011706	0.026507	TCONS_00025423	66158	Rtl8a	transcript	1.29636	0	Inf	0.000820671	0.0276354
mmu-miR-690	1195.04	385.602	1.4425	0.0010865	0.02646	TCONS_00025423	66158	Rtl8a	transcript	1.29636	0	Inf	0.000820671	0.0276354
mmu-miR-214-3p	866.854	544.158	0.66229	0.00013468	0.0046466	TCONS_00025423	66158	Rtl8a	transcript	1.29636	0	Inf	0.000820671	0.0276354
mmu-miR-467b-5p	101.062	157.027	-0.63987	0.0013446	0.026507	NM_194054.3	68585	Rtn4	transcript	19.3943	6.79656	1.51275	0.00219731	0.0438821
mmu-miR-214-5p	271.213	165.169	0.69303	6.26e-05	0.0028804	NM_194054.3	68585	Rtn4	transcript	19.3943	6.79656	1.51275	0.00219731	0.0438821
mmu-miR-3470b	336.04	56.7948	2.1526	1.98e-05	0.0013662	NM_194054.3	68585	Rtn4	transcript	19.3943	6.79656	1.51275	0.00219731	0.0438821
mmu-miR-467a-5p	101.062	157.027	-0.63987	0.0013446	0.026507	NM_194054.3	68585	Rtn4	transcript	19.3943	6.79656	1.51275	0.00219731	0.0438821
mmu-miR-5126	30.4974	5.65546	2.0107	5.18e-05	0.00284	XM_006504490.4	66711	Sbds	transcript	5.04204	0.162342	4.9569	0.000582299	0.0276354
mmu-miR-466i-5p	352.593	42.1158	2.344	5.49e-05	0.00284	XM_006504490.4	66711	Sbds	transcript	5.04204	0.162342	4.9569	0.000582299	0.0276354
mmu-miR-214-3p	866.854	544.158	0.66229	0.00013468	0.0046466	XM_006504490.4	66711	Sbds	transcript	5.04204	0.162342	4.9569	0.000582299	0.0276354
mmu-miR-200a-3p	143.74	23.9782	1.9969	0.00056829	0.015685	XM_006504490.4	66711	Sbds	transcript	5.04204	0.162342	4.9569	0.000582299	0.0276354
mmu-miR-874-3p	67.1603	160.155	-1.1385	0.0024216	0.042104	TCONS_00014905	216161	Sbno2	transcript	4.64735	3.20414	0.536473	0.00139977	0.0352728
mmu-miR-466i-5p	352.593	42.1158	2.344	5.49e-05	0.00284	TCONS_00014905	216161	Sbno2	transcript	4.64735	3.20414	0.536473	0.00139977	0.0352728
mmu-miR-29b-2-5p	32.6134	115.312	-1.5205	0.0011706	0.026507	TCONS_00014905	216161	Sbno2	transcript	4.64735	3.20414	0.536473	0.00139977	0.0352728
mmu-miR-193b-3p	657.266	247.533	1.3911	4.18e-26	1.73e-23	TCONS_00014905	216161	Sbno2	transcript	4.64735	3.20414	0.536473	0.00139977	0.0352728
mmu-miR-1983	29.9641	89.2893	-1.379	0.00016096	0.0051261	TCONS_00014905	216161	Sbno2	transcript	4.64735	3.20414	0.536473	0.00139977	0.0352728
mmu-miR-3470b	336.04	56.7948	2.1526	1.98e-05	0.0013662	TCONS_00014905	216161	Sbno2	transcript	4.64735	3.20414	0.536473	0.00139977	0.0352728
mmu-miR-146a-5p	1144.77	2572.83	-1.0815	0.0024408	0.042104	TCONS_00014905	216161	Sbno2	transcript	4.64735	3.20414	0.536473	0.00139977	0.0352728
mmu-miR-200a-3p	143.74	23.9782	1.9969	0.00056829	0.015685	TCONS_00013502	244891	Scaper	transcript	6.29439	4.31111	0.546008	0.000665473	0.0276354
mmu-miR-200b-3p	90.9629	28.7971	1.6296	1.15e-10	1.59e-08	NM_009128.2	20250	Scd2	transcript	5.03621	2.28079	1.14281	0.00036858	0.0276354
mmu-miR-214-3p	866.854	544.158	0.66229	0.00013468	0.0046466	NM_009128.2	20250	Scd2	transcript	5.03621	2.28079	1.14281	0.00036858	0.0276354
mmu-miR-200a-3p	143.74	23.9782	1.9969	0.00056829	0.015685	NM_009128.2	20250	Scd2	transcript	5.03621	2.28079	1.14281	0.00036858	0.0276354
mmu-miR-467a-5p	101.062	157.027	-0.63987	0.0013446	0.026507	NM_009128.2	20250	Scd2	transcript	5.03621	2.28079	1.14281	0.00036858	0.0276354
mmu-miR-874-3p	67.1603	160.155	-1.1385	0.0024216	0.042104	NM_001013390.3	399548	Scn4b	transcript	2.15251	16.2847	-2.91942	0.00111032	0.0316263
mmu-miR-365-1-5p	42.0397	9.35359	1.749	0.00085832	0.022209	NM_001013390.3	399548	Scn4b	transcript	2.15251	16.2847	-2.91942	0.00111032	0.0316263
mmu-miR-690	1195.04	385.602	1.4425	0.0010865	0.02646	NM_001013390.3	399548	Scn4b	transcript	2.15251	16.2847	-2.91942	0.00111032	0.0316263
mmu-miR-214-3p	866.854	544.158	0.66229	0.00013468	0.0046466	NM_001013390.3	399548	Scn4b	transcript	2.15251	16.2847	-2.91942	0.00111032	0.0316263
mmu-miR-214-5p	271.213	165.169	0.69303	6.26e-05	0.0028804	NM_001013390.3	399548	Scn4b	transcript	2.15251	16.2847	-2.91942	0.00111032	0.0316263
mmu-miR-221-3p	2269.82	1235.67	0.8571	8.52e-05	0.0035266	NM_001013390.3	399548	Scn4b	transcript	2.15251	16.2847	-2.91942	0.00111032	0.0316263
mmu-miR-365-2-5p	8.11913	1.17918	1.9254	0.0018939	0.035639	NM_001013390.3	399548	Scn4b	transcript	2.15251	16.2847	-2.91942	0.00111032	0.0316263
mmu-miR-467a-5p	101.062	157.027	-0.63987	0.0013446	0.026507	NM_001013390.3	399548	Scn4b	transcript	2.15251	16.2847	-2.91942	0.00111032	0.0316263
mmu-miR-100-5p	11740	27586.4	-1.185	7.37e-06	0.00060997	NM_029023.3	74617	Scpep1	transcript	4.31216	2.93121	0.556913	0.00138912	0.035236
mmu-miR-29b-2-5p	32.6134	115.312	-1.5205	0.0011706	0.026507	TCONS_00023547	72124	Seh1l	transcript	2.33466	0.0211037	6.78958	0.000969142	0.0297987
mmu-miR-1983	29.9641	89.2893	-1.379	0.00016096	0.0051261	TCONS_00023547	72124	Seh1l	transcript	2.33466	0.0211037	6.78958	0.000969142	0.0297987
mmu-miR-100-5p	11740	27586.4	-1.185	7.37e-06	0.00060997	TCONS_00023547	72124	Seh1l	transcript	2.33466	0.0211037	6.78958	0.000969142	0.0297987
mmu-miR-214-3p	866.854	544.158	0.66229	0.00013468	0.0046466	NM_009776.3	12258	Serping1	transcript	16.347	19.022	-0.218642	0.000205943	0.0276354
mmu-miR-214-5p	271.213	165.169	0.69303	6.26e-05	0.0028804	NM_009776.3	12258	Serping1	transcript	16.347	19.022	-0.218642	0.000205943	0.0276354
mmu-miR-29b-2-5p	32.6134	115.312	-1.5205	0.0011706	0.026507	NM_013651.4	20222	Sf3a2	transcript	0.17961	7.15197	-5.3154	0.00174107	0.0385677
mmu-miR-208a-5p	1.68468	98.5205	-4.8306	5.8e-20	1.2e-17	NM_011891.5	24052	Sgcd	transcript	18.6344	17.8815	0.0595064	0.00150574	0.0364287
mmu-miR-200a-3p	143.74	23.9782	1.9969	0.00056829	0.015685	NM_011891.5	24052	Sgcd	transcript	18.6344	17.8815	0.0595064	0.00150574	0.0364287
mmu-miR-29b-2-5p	32.6134	115.312	-1.5205	0.0011706	0.026507	XM_006534523.2	79566	Sh3bp5l	transcript	1.99289	0.00804	7.95345	0.000614637	0.0276354
mmu-miR-214-5p	271.213	165.169	0.69303	6.26e-05	0.0028804	XM_006534523.2	79566	Sh3bp5l	transcript	1.99289	0.00804	7.95345	0.000614637	0.0276354
mmu-miR-467b-5p	101.062	157.027	-0.63987	0.0013446	0.026507	NM_001135727.2	58194	Sh3kbp1	transcript	1.997	0.796374	1.32632	0.000217453	0.0276354
mmu-miR-208a-5p	1.68468	98.5205	-4.8306	5.8e-20	1.2e-17	NM_001135727.2	58194	Sh3kbp1	transcript	1.997	0.796374	1.32632	0.000217453	0.0276354
mmu-miR-221-3p	2269.82	1235.67	0.8571	8.52e-05	0.0035266	NM_001135727.2	58194	Sh3kbp1	transcript	1.997	0.796374	1.32632	0.000217453	0.0276354
mmu-miR-200a-3p	143.74	23.9782	1.9969	0.00056829	0.015685	NM_001135727.2	58194	Sh3kbp1	transcript	1.997	0.796374	1.32632	0.000217453	0.0276354
mmu-miR-3470b	336.04	56.7948	2.1526	1.98e-05	0.0013662	NM_001135727.2	58194	Sh3kbp1	transcript	1.997	0.796374	1.32632	0.000217453	0.0276354
mmu-miR-146a-5p	1144.77	2572.83	-1.0815	0.0024408	0.042104	NM_001135727.2	58194	Sh3kbp1	transcript	1.997	0.796374	1.32632	0.000217453	0.0276354
mmu-miR-29b-2-5p	32.6134	115.312	-1.5205	0.0011706	0.026507	NM_009195.3	20498	Slc12a4	transcript	6.17795	9.86484	-0.675168	0.00251823	0.0478546
mmu-miR-365-1-5p	42.0397	9.35359	1.749	0.00085832	0.022209	NM_182993.2	72961	Slc17a7	transcript	2.46585	6.72513	-1.44748	0.000187094	0.0276354
mmu-miR-365-2-5p	8.11913	1.17918	1.9254	0.0018939	0.035639	NM_182993.2	72961	Slc17a7	transcript	2.46585	6.72513	-1.44748	0.000187094	0.0276354
mmu-miR-365-1-5p	42.0397	9.35359	1.749	0.00085832	0.022209	XM_006530878.1	234595	Slc38a7	transcript	0.923806	0.0383027	4.59207	3.17e-05	0.0155632
mmu-miR-214-3p	866.854	544.158	0.66229	0.00013468	0.0046466	XM_006530878.1	234595	Slc38a7	transcript	0.923806	0.0383027	4.59207	3.17e-05	0.0155632
mmu-miR-1983	29.9641	89.2893	-1.379	0.00016096	0.0051261	XM_006530878.1	234595	Slc38a7	transcript	0.923806	0.0383027	4.59207	3.17e-05	0.0155632
mmu-miR-365-2-5p	8.11913	1.17918	1.9254	0.0018939	0.035639	XM_006530878.1	234595	Slc38a7	transcript	0.923806	0.0383027	4.59207	3.17e-05	0.0155632
mmu-miR-200b-3p	90.9629	28.7971	1.6296	1.15e-10	1.59e-08	XM_006533995.4	67473	Slc47a1	transcript	1.20768	0.0603787	4.32205	0.000196345	0.0276354
mmu-miR-214-3p	866.854	544.158	0.66229	0.00013468	0.0046466	XM_006533995.4	67473	Slc47a1	transcript	1.20768	0.0603787	4.32205	0.000196345	0.0276354
mmu-miR-208a-5p	1.68468	98.5205	-4.8306	5.8e-20	1.2e-17	XM_006533995.4	67473	Slc47a1	transcript	1.20768	0.0603787	4.32205	0.000196345	0.0276354
mmu-miR-146a-5p	1144.77	2572.83	-1.0815	0.0024408	0.042104	XM_006533995.4	67473	Slc47a1	transcript	1.20768	0.0603787	4.32205	0.000196345	0.0276354
mmu-miR-1195	19.6113	1.98363	2.212	0.0004848	0.014336	NM_183283.3	69576	Smco1	transcript	1.93158	5.54452	-1.52129	0.000297473	0.0276354
mmu-miR-221-3p	2269.82	1235.67	0.8571	8.52e-05	0.0035266	TCONS_00025673	20603	Sms	transcript	0.904215	0	Inf	0.000820671	0.0276354
mmu-miR-200b-3p	90.9629	28.7971	1.6296	1.15e-10	1.59e-08	XM_036157306.1	217463	Snx13	transcript	1.9793	0	Inf	0.000820671	0.0276354
mmu-miR-466i-5p	352.593	42.1158	2.344	5.49e-05	0.00284	XM_036157306.1	217463	Snx13	transcript	1.9793	0	Inf	0.000820671	0.0276354
mmu-miR-690	1195.04	385.602	1.4425	0.0010865	0.02646	XM_036157306.1	217463	Snx13	transcript	1.9793	0	Inf	0.000820671	0.0276354
mmu-miR-214-3p	866.854	544.158	0.66229	0.00013468	0.0046466	XM_036157306.1	217463	Snx13	transcript	1.9793	0	Inf	0.000820671	0.0276354
mmu-miR-1983	29.9641	89.2893	-1.379	0.00016096	0.0051261	XM_036157306.1	217463	Snx13	transcript	1.9793	0	Inf	0.000820671	0.0276354
mmu-miR-3470b	336.04	56.7948	2.1526	1.98e-05	0.0013662	XM_036157306.1	217463	Snx13	transcript	1.9793	0	Inf	0.000820671	0.0276354
mmu-miR-200b-3p	90.9629	28.7971	1.6296	1.15e-10	1.59e-08	XM_006524674.5	56468	Socs5	transcript	2.99592	0.0603897	5.63255	0.000527102	0.0276354
mmu-miR-874-3p	67.1603	160.155	-1.1385	0.0024216	0.042104	XM_006524674.5	56468	Socs5	transcript	2.99592	0.0603897	5.63255	0.000527102	0.0276354
mmu-miR-29b-2-5p	32.6134	115.312	-1.5205	0.0011706	0.026507	XM_006524674.5	56468	Socs5	transcript	2.99592	0.0603897	5.63255	0.000527102	0.0276354
mmu-miR-690	1195.04	385.602	1.4425	0.0010865	0.02646	XM_006524674.5	56468	Socs5	transcript	2.99592	0.0603897	5.63255	0.000527102	0.0276354
mmu-miR-467b-5p	101.062	157.027	-0.63987	0.0013446	0.026507	XM_006524674.5	56468	Socs5	transcript	2.99592	0.0603897	5.63255	0.000527102	0.0276354
mmu-miR-467a-5p	101.062	157.027	-0.63987	0.0013446	0.026507	XM_006524674.5	56468	Socs5	transcript	2.99592	0.0603897	5.63255	0.000527102	0.0276354
mmu-miR-5126	30.4974	5.65546	2.0107	5.18e-05	0.00284	TCONS_00022043	20656	Sod2	transcript	6.07359	0.19545	4.95768	0.0002461	0.0276354
mmu-miR-200b-3p	90.9629	28.7971	1.6296	1.15e-10	1.59e-08	TCONS_00022043	20656	Sod2	transcript	6.07359	0.19545	4.95768	0.0002461	0.0276354
mmu-miR-874-3p	67.1603	160.155	-1.1385	0.0024216	0.042104	TCONS_00022043	20656	Sod2	transcript	6.07359	0.19545	4.95768	0.0002461	0.0276354
mmu-miR-466i-5p	352.593	42.1158	2.344	5.49e-05	0.00284	TCONS_00022043	20656	Sod2	transcript	6.07359	0.19545	4.95768	0.0002461	0.0276354
mmu-miR-29b-2-5p	32.6134	115.312	-1.5205	0.0011706	0.026507	TCONS_00022043	20656	Sod2	transcript	6.07359	0.19545	4.95768	0.0002461	0.0276354
mmu-miR-214-3p	866.854	544.158	0.66229	0.00013468	0.0046466	TCONS_00022043	20656	Sod2	transcript	6.07359	0.19545	4.95768	0.0002461	0.0276354
mmu-miR-193b-3p	657.266	247.533	1.3911	4.18e-26	1.73e-23	TCONS_00022043	20656	Sod2	transcript	6.07359	0.19545	4.95768	0.0002461	0.0276354
mmu-miR-214-5p	271.213	165.169	0.69303	6.26e-05	0.0028804	TCONS_00022043	20656	Sod2	transcript	6.07359	0.19545	4.95768	0.0002461	0.0276354
mmu-miR-1983	29.9641	89.2893	-1.379	0.00016096	0.0051261	TCONS_00022043	20656	Sod2	transcript	6.07359	0.19545	4.95768	0.0002461	0.0276354
mmu-miR-221-3p	2269.82	1235.67	0.8571	8.52e-05	0.0035266	TCONS_00022043	20656	Sod2	transcript	6.07359	0.19545	4.95768	0.0002461	0.0276354
mmu-miR-200a-3p	143.74	23.9782	1.9969	0.00056829	0.015685	TCONS_00022043	20656	Sod2	transcript	6.07359	0.19545	4.95768	0.0002461	0.0276354
mmu-miR-3470b	336.04	56.7948	2.1526	1.98e-05	0.0013662	TCONS_00022043	20656	Sod2	transcript	6.07359	0.19545	4.95768	0.0002461	0.0276354
mmu-miR-146a-5p	1144.77	2572.83	-1.0815	0.0024408	0.042104	TCONS_00022043	20656	Sod2	transcript	6.07359	0.19545	4.95768	0.0002461	0.0276354
mmu-miR-467a-5p	101.062	157.027	-0.63987	0.0013446	0.026507	TCONS_00022043	20656	Sod2	transcript	6.07359	0.19545	4.95768	0.0002461	0.0276354
mmu-miR-1195	19.6113	1.98363	2.212	0.0004848	0.014336	TCONS_00022043	20656	Sod2	transcript	6.07359	0.19545	4.95768	0.0002461	0.0276354
mmu-miR-214-3p	866.854	544.158	0.66229	0.00013468	0.0046466	NM_011435.3	20657	Sod3	transcript	6.60321	9.08811	-0.460813	0.00117059	0.0326432
mmu-miR-208a-3p	19.6731	144.716	-2.1853	0.00010883	0.0040958	NM_011435.3	20657	Sod3	transcript	6.60321	9.08811	-0.460813	0.00117059	0.0326432
mmu-miR-365-1-5p	42.0397	9.35359	1.749	0.00085832	0.022209	XM_006509385.1	234214	Sorbs2	transcript	6.88617	3.47697	0.985873	0.000327036	0.0276354
mmu-miR-467b-5p	101.062	157.027	-0.63987	0.0013446	0.026507	XM_006509385.1	234214	Sorbs2	transcript	6.88617	3.47697	0.985873	0.000327036	0.0276354
mmu-miR-208a-5p	1.68468	98.5205	-4.8306	5.8e-20	1.2e-17	XM_006509385.1	234214	Sorbs2	transcript	6.88617	3.47697	0.985873	0.000327036	0.0276354
mmu-miR-214-5p	271.213	165.169	0.69303	6.26e-05	0.0028804	XM_006509385.1	234214	Sorbs2	transcript	6.88617	3.47697	0.985873	0.000327036	0.0276354
mmu-miR-6538	304.502	74.5948	1.8593	7.2e-07	7.45e-05	XM_006509385.1	234214	Sorbs2	transcript	6.88617	3.47697	0.985873	0.000327036	0.0276354
novel_1	13879.1	1929.61	2.0063	0.0013125	0.026507	XM_006509385.1	234214	Sorbs2	transcript	6.88617	3.47697	0.985873	0.000327036	0.0276354
mmu-miR-200a-3p	143.74	23.9782	1.9969	0.00056829	0.015685	XM_006509385.1	234214	Sorbs2	transcript	6.88617	3.47697	0.985873	0.000327036	0.0276354
mmu-miR-3470b	336.04	56.7948	2.1526	1.98e-05	0.0013662	XM_006509385.1	234214	Sorbs2	transcript	6.88617	3.47697	0.985873	0.000327036	0.0276354
mmu-miR-365-2-5p	8.11913	1.17918	1.9254	0.0018939	0.035639	XM_006509385.1	234214	Sorbs2	transcript	6.88617	3.47697	0.985873	0.000327036	0.0276354
mmu-miR-467a-5p	101.062	157.027	-0.63987	0.0013446	0.026507	XM_006509385.1	234214	Sorbs2	transcript	6.88617	3.47697	0.985873	0.000327036	0.0276354
mmu-miR-200b-3p	90.9629	28.7971	1.6296	1.15e-10	1.59e-08	NM_146126.4	20322	Sord	transcript	70.6529	43.3695	0.704067	0.000548691	0.0276354
mmu-miR-3470b	336.04	56.7948	2.1526	1.98e-05	0.0013662	NM_001082548.1	20733	Spint2	transcript	14.4448	8.0117	0.850369	0.00015573	0.0276354
mmu-miR-874-3p	67.1603	160.155	-1.1385	0.0024216	0.042104	XM_036156491.1	20787	Srebf1	transcript	2.73364	0.07479	5.19183	7.86e-05	0.0253471
mmu-miR-466i-5p	352.593	42.1158	2.344	5.49e-05	0.00284	XM_036156491.1	20787	Srebf1	transcript	2.73364	0.07479	5.19183	7.86e-05	0.0253471
mmu-miR-365-1-5p	42.0397	9.35359	1.749	0.00085832	0.022209	XM_017316846.2	106393	Srl	transcript	1.95815	3.58796	-0.873667	3.65e-05	0.0155632
mmu-miR-29b-2-5p	32.6134	115.312	-1.5205	0.0011706	0.026507	XM_017316846.2	106393	Srl	transcript	1.95815	3.58796	-0.873667	3.65e-05	0.0155632
mmu-miR-200a-3p	143.74	23.9782	1.9969	0.00056829	0.015685	XM_017316846.2	106393	Srl	transcript	1.95815	3.58796	-0.873667	3.65e-05	0.0155632
mmu-miR-365-2-5p	8.11913	1.17918	1.9254	0.0018939	0.035639	XM_017316846.2	106393	Srl	transcript	1.95815	3.58796	-0.873667	3.65e-05	0.0155632
mmu-miR-200b-3p	90.9629	28.7971	1.6296	1.15e-10	1.59e-08	TCONS_00017437	100101806	Srp54c	transcript	2.51518	0.0124837	7.65447	0.000375769	0.0276354
mmu-miR-146a-5p	1144.77	2572.83	-1.0815	0.0024408	0.042104	TCONS_00017437	100101806	Srp54c	transcript	2.51518	0.0124837	7.65447	0.000375769	0.0276354
mmu-miR-208a-5p	1.68468	98.5205	-4.8306	5.8e-20	1.2e-17	XM_006499070.3	20833	Ssrp1	transcript	3.26077	3.73579	-0.196201	0.00253063	0.0479475
mmu-miR-200b-3p	90.9629	28.7971	1.6296	1.15e-10	1.59e-08	NM_018784.3	54613	St3gal6	transcript	2.97499	0.000128	14.5045	0.00186919	0.0404616
mmu-miR-466i-5p	352.593	42.1158	2.344	5.49e-05	0.00284	NM_018784.3	54613	St3gal6	transcript	2.97499	0.000128	14.5045	0.00186919	0.0404616
mmu-miR-690	1195.04	385.602	1.4425	0.0010865	0.02646	NM_018784.3	54613	St3gal6	transcript	2.97499	0.000128	14.5045	0.00186919	0.0404616
mmu-miR-221-3p	2269.82	1235.67	0.8571	8.52e-05	0.0035266	NM_018784.3	54613	St3gal6	transcript	2.97499	0.000128	14.5045	0.00186919	0.0404616
mmu-miR-146a-5p	1144.77	2572.83	-1.0815	0.0024408	0.042104	NM_018784.3	54613	St3gal6	transcript	2.97499	0.000128	14.5045	0.00186919	0.0404616
mmu-miR-208a-5p	1.68468	98.5205	-4.8306	5.8e-20	1.2e-17	NM_016866.2	53416	Stk39	transcript	31.274	14.9749	1.06242	0.00137873	0.0351828
mmu-miR-200b-3p	90.9629	28.7971	1.6296	1.15e-10	1.59e-08	NM_172656.6	227154	Stradb	transcript	11.7639	11.8843	-0.0146883	0.00148624	0.0361929
mmu-miR-690	1195.04	385.602	1.4425	0.0010865	0.02646	NM_172656.6	227154	Stradb	transcript	11.7639	11.8843	-0.0146883	0.00148624	0.0361929
mmu-miR-200a-3p	143.74	23.9782	1.9969	0.00056829	0.015685	NM_172656.6	227154	Stradb	transcript	11.7639	11.8843	-0.0146883	0.00148624	0.0361929
mmu-miR-214-5p	271.213	165.169	0.69303	6.26e-05	0.0028804	NM_177204.3	320609	Strip2	transcript	52.5515	20.3251	1.37047	0.000386629	0.0276354
mmu-miR-221-3p	2269.82	1235.67	0.8571	8.52e-05	0.0035266	NM_177204.3	320609	Strip2	transcript	52.5515	20.3251	1.37047	0.000386629	0.0276354
mmu-miR-3470b	336.04	56.7948	2.1526	1.98e-05	0.0013662	NM_177204.3	320609	Strip2	transcript	52.5515	20.3251	1.37047	0.000386629	0.0276354
mmu-miR-466i-5p	352.593	42.1158	2.344	5.49e-05	0.00284	TCONS_00013369	16430	Stt3a	transcript	2.1204	0	Inf	0.000820671	0.0276354
mmu-miR-221-3p	2269.82	1235.67	0.8571	8.52e-05	0.0035266	TCONS_00013369	16430	Stt3a	transcript	2.1204	0	Inf	0.000820671	0.0276354
mmu-miR-146a-5p	1144.77	2572.83	-1.0815	0.0024408	0.042104	TCONS_00013369	16430	Stt3a	transcript	2.1204	0	Inf	0.000820671	0.0276354
mmu-miR-200b-3p	90.9629	28.7971	1.6296	1.15e-10	1.59e-08	NM_009460.2	22218	Sumo1	transcript	17.3848	17.6556	-0.0223016	0.000293226	0.0276354
mmu-miR-29b-2-5p	32.6134	115.312	-1.5205	0.0011706	0.026507	TCONS_00020910	223697	Sun2	transcript	2.54478	0	Inf	0.000820671	0.0276354
mmu-miR-214-3p	866.854	544.158	0.66229	0.00013468	0.0046466	TCONS_00020910	223697	Sun2	transcript	2.54478	0	Inf	0.000820671	0.0276354
mmu-miR-221-3p	2269.82	1235.67	0.8571	8.52e-05	0.0035266	TCONS_00020910	223697	Sun2	transcript	2.54478	0	Inf	0.000820671	0.0276354
mmu-miR-193b-3p	657.266	247.533	1.3911	4.18e-26	1.73e-23	XM_006497825.4	20930	Surf1	transcript	1.1796	0	Inf	0.000820671	0.0276354
mmu-miR-467a-5p	101.062	157.027	-0.63987	0.0013446	0.026507	XM_006500037.5	66860	Tanc1	transcript	2.85713	0	Inf	0.000277181	0.0276354
mmu-miR-466i-5p	352.593	42.1158	2.344	5.49e-05	0.00284	NM_001013405.2	382117	Tcaim	transcript	8.05087	10.1399	-0.332829	0.00145357	0.0359344
mmu-miR-208a-5p	1.68468	98.5205	-4.8306	5.8e-20	1.2e-17	NM_001013405.2	382117	Tcaim	transcript	8.05087	10.1399	-0.332829	0.00145357	0.0359344
mmu-miR-1983	29.9641	89.2893	-1.379	0.00016096	0.0051261	NM_001013405.2	382117	Tcaim	transcript	8.05087	10.1399	-0.332829	0.00145357	0.0359344
mmu-miR-214-3p	866.854	544.158	0.66229	0.00013468	0.0046466	TCONS_00005210	21687	Tek	transcript	2.18464	0	Inf	0.000820671	0.0276354
mmu-miR-29b-2-5p	32.6134	115.312	-1.5205	0.0011706	0.026507	NM_001313983.1	21833	Thra	transcript	5.65207	2.85442	0.98558	0.00134355	0.0347693
mmu-miR-3470b	336.04	56.7948	2.1526	1.98e-05	0.0013662	TCONS_00015723	68385	Tlcd1	transcript	4.40233	4.18826	0.0719179	0.00123784	0.0335637
mmu-miR-200b-3p	90.9629	28.7971	1.6296	1.15e-10	1.59e-08	NM_001081242.2	70549	Tln2	transcript	2.63951	0.0295667	6.48015	0.000371777	0.0276354
mmu-miR-874-3p	67.1603	160.155	-1.1385	0.0024216	0.042104	NM_001081242.2	70549	Tln2	transcript	2.63951	0.0295667	6.48015	0.000371777	0.0276354
mmu-miR-466i-5p	352.593	42.1158	2.344	5.49e-05	0.00284	NM_001081242.2	70549	Tln2	transcript	2.63951	0.0295667	6.48015	0.000371777	0.0276354
mmu-miR-29b-2-5p	32.6134	115.312	-1.5205	0.0011706	0.026507	NM_001081242.2	70549	Tln2	transcript	2.63951	0.0295667	6.48015	0.000371777	0.0276354
mmu-miR-193b-3p	657.266	247.533	1.3911	4.18e-26	1.73e-23	NM_001081242.2	70549	Tln2	transcript	2.63951	0.0295667	6.48015	0.000371777	0.0276354
mmu-miR-3470b	336.04	56.7948	2.1526	1.98e-05	0.0013662	NM_001081242.2	70549	Tln2	transcript	2.63951	0.0295667	6.48015	0.000371777	0.0276354
mmu-miR-146a-5p	1144.77	2572.83	-1.0815	0.0024408	0.042104	NM_001081242.2	70549	Tln2	transcript	2.63951	0.0295667	6.48015	0.000371777	0.0276354
mmu-miR-1195	19.6113	1.98363	2.212	0.0004848	0.014336	NM_001081242.2	70549	Tln2	transcript	2.63951	0.0295667	6.48015	0.000371777	0.0276354
mmu-miR-214-3p	866.854	544.158	0.66229	0.00013468	0.0046466	NM_026919.1	69038	Tmem258	transcript	30.5924	45.4779	-0.571991	0.00175494	0.0386422
mmu-miR-214-5p	271.213	165.169	0.69303	6.26e-05	0.0028804	NM_026919.1	69038	Tmem258	transcript	30.5924	45.4779	-0.571991	0.00175494	0.0386422
mmu-miR-208a-5p	1.68468	98.5205	-4.8306	5.8e-20	1.2e-17	NM_029565.3	56374	Tmem59	transcript	46.8383	35.0226	0.419403	0.00257585	0.0483411
mmu-miR-208a-5p	1.68468	98.5205	-4.8306	5.8e-20	1.2e-17	NM_175212.4	74868	Tmem65	transcript	32.9378	38.7813	-0.235616	0.00130764	0.0342571
mmu-miR-1983	29.9641	89.2893	-1.379	0.00016096	0.0051261	NM_175212.4	74868	Tmem65	transcript	32.9378	38.7813	-0.235616	0.00130764	0.0342571
mmu-miR-200a-3p	143.74	23.9782	1.9969	0.00056829	0.015685	NM_175212.4	74868	Tmem65	transcript	32.9378	38.7813	-0.235616	0.00130764	0.0342571
mmu-miR-1983	29.9641	89.2893	-1.379	0.00016096	0.0051261	NM_020050.1	56786	Tmem9b	transcript	11.4859	8.63257	0.412005	0.000233123	0.0276354
mmu-miR-874-3p	67.1603	160.155	-1.1385	0.0024216	0.042104	TCONS_00001035	21961	Tns1	transcript	39.6786	2.46049	4.01134	0.00031257	0.0276354
mmu-miR-466i-5p	352.593	42.1158	2.344	5.49e-05	0.00284	TCONS_00001035	21961	Tns1	transcript	39.6786	2.46049	4.01134	0.00031257	0.0276354
mmu-miR-365-1-5p	42.0397	9.35359	1.749	0.00085832	0.022209	TCONS_00001035	21961	Tns1	transcript	39.6786	2.46049	4.01134	0.00031257	0.0276354
mmu-miR-690	1195.04	385.602	1.4425	0.0010865	0.02646	TCONS_00001035	21961	Tns1	transcript	39.6786	2.46049	4.01134	0.00031257	0.0276354
mmu-miR-214-3p	866.854	544.158	0.66229	0.00013468	0.0046466	TCONS_00001035	21961	Tns1	transcript	39.6786	2.46049	4.01134	0.00031257	0.0276354
mmu-miR-467b-5p	101.062	157.027	-0.63987	0.0013446	0.026507	TCONS_00001035	21961	Tns1	transcript	39.6786	2.46049	4.01134	0.00031257	0.0276354
mmu-miR-208a-5p	1.68468	98.5205	-4.8306	5.8e-20	1.2e-17	TCONS_00001035	21961	Tns1	transcript	39.6786	2.46049	4.01134	0.00031257	0.0276354
mmu-miR-193b-3p	657.266	247.533	1.3911	4.18e-26	1.73e-23	TCONS_00001035	21961	Tns1	transcript	39.6786	2.46049	4.01134	0.00031257	0.0276354
novel_1	13879.1	1929.61	2.0063	0.0013125	0.026507	TCONS_00001035	21961	Tns1	transcript	39.6786	2.46049	4.01134	0.00031257	0.0276354
mmu-miR-200a-3p	143.74	23.9782	1.9969	0.00056829	0.015685	TCONS_00001035	21961	Tns1	transcript	39.6786	2.46049	4.01134	0.00031257	0.0276354
mmu-miR-365-2-5p	8.11913	1.17918	1.9254	0.0018939	0.035639	TCONS_00001035	21961	Tns1	transcript	39.6786	2.46049	4.01134	0.00031257	0.0276354
mmu-miR-467a-5p	101.062	157.027	-0.63987	0.0013446	0.026507	TCONS_00001035	21961	Tns1	transcript	39.6786	2.46049	4.01134	0.00031257	0.0276354
mmu-miR-3470b	336.04	56.7948	2.1526	1.98e-05	0.0013662	NM_153533.3	209039	Tns2	transcript	31.8421	20.8804	0.608783	0.00244786	0.0472187
mmu-miR-214-3p	866.854	544.158	0.66229	0.00013468	0.0046466	TCONS_00022295	81877	Tnxb	transcript	1.75426	0	Inf	0.000820671	0.0276354
mmu-miR-874-3p	67.1603	160.155	-1.1385	0.0024216	0.042104	NM_153080.3	216810	Tom1l2	transcript	1.13139	0.017205	6.03913	0.00117465	0.0326745
mmu-miR-365-1-5p	42.0397	9.35359	1.749	0.00085832	0.022209	NM_153080.3	216810	Tom1l2	transcript	1.13139	0.017205	6.03913	0.00117465	0.0326745
mmu-miR-193b-3p	657.266	247.533	1.3911	4.18e-26	1.73e-23	NM_153080.3	216810	Tom1l2	transcript	1.13139	0.017205	6.03913	0.00117465	0.0326745
mmu-miR-214-5p	271.213	165.169	0.69303	6.26e-05	0.0028804	NM_153080.3	216810	Tom1l2	transcript	1.13139	0.017205	6.03913	0.00117465	0.0326745
mmu-miR-200a-3p	143.74	23.9782	1.9969	0.00056829	0.015685	NM_153080.3	216810	Tom1l2	transcript	1.13139	0.017205	6.03913	0.00117465	0.0326745
mmu-miR-3470b	336.04	56.7948	2.1526	1.98e-05	0.0013662	NM_153080.3	216810	Tom1l2	transcript	1.13139	0.017205	6.03913	0.00117465	0.0326745
mmu-miR-365-2-5p	8.11913	1.17918	1.9254	0.0018939	0.035639	NM_153080.3	216810	Tom1l2	transcript	1.13139	0.017205	6.03913	0.00117465	0.0326745
mmu-miR-874-3p	67.1603	160.155	-1.1385	0.0024216	0.042104	NM_024214.2	67952	Tomm20	transcript	10.2066	7.84903	0.378922	0.000773909	0.0276354
mmu-miR-214-3p	866.854	544.158	0.66229	0.00013468	0.0046466	NM_024214.2	67952	Tomm20	transcript	10.2066	7.84903	0.378922	0.000773909	0.0276354
mmu-miR-467b-5p	101.062	157.027	-0.63987	0.0013446	0.026507	NM_024214.2	67952	Tomm20	transcript	10.2066	7.84903	0.378922	0.000773909	0.0276354
mmu-miR-208a-5p	1.68468	98.5205	-4.8306	5.8e-20	1.2e-17	NM_024214.2	67952	Tomm20	transcript	10.2066	7.84903	0.378922	0.000773909	0.0276354
mmu-miR-193b-3p	657.266	247.533	1.3911	4.18e-26	1.73e-23	NM_024214.2	67952	Tomm20	transcript	10.2066	7.84903	0.378922	0.000773909	0.0276354
mmu-miR-221-3p	2269.82	1235.67	0.8571	8.52e-05	0.0035266	NM_024214.2	67952	Tomm20	transcript	10.2066	7.84903	0.378922	0.000773909	0.0276354
mmu-miR-200a-3p	143.74	23.9782	1.9969	0.00056829	0.015685	NM_024214.2	67952	Tomm20	transcript	10.2066	7.84903	0.378922	0.000773909	0.0276354
mmu-miR-3470b	336.04	56.7948	2.1526	1.98e-05	0.0013662	NM_024214.2	67952	Tomm20	transcript	10.2066	7.84903	0.378922	0.000773909	0.0276354
mmu-miR-467a-5p	101.062	157.027	-0.63987	0.0013446	0.026507	NM_024214.2	67952	Tomm20	transcript	10.2066	7.84903	0.378922	0.000773909	0.0276354
mmu-miR-874-3p	67.1603	160.155	-1.1385	0.0024216	0.042104	NM_001347446.1	94089	Trim7	transcript	1.16147	7.15854	-2.62371	0.00045152	0.0276354
mmu-miR-214-3p	866.854	544.158	0.66229	0.00013468	0.0046466	NM_001347446.1	94089	Trim7	transcript	1.16147	7.15854	-2.62371	0.00045152	0.0276354
mmu-miR-1983	29.9641	89.2893	-1.379	0.00016096	0.0051261	NM_001347446.1	94089	Trim7	transcript	1.16147	7.15854	-2.62371	0.00045152	0.0276354
mmu-miR-221-3p	2269.82	1235.67	0.8571	8.52e-05	0.0035266	NM_001347446.1	94089	Trim7	transcript	1.16147	7.15854	-2.62371	0.00045152	0.0276354
mmu-miR-214-3p	866.854	544.158	0.66229	0.00013468	0.0046466	TCONS_00025632	14605	Tsc22d3	transcript	6.76223	7.56572	-0.161979	0.00193513	0.0411922
mmu-miR-221-3p	2269.82	1235.67	0.8571	8.52e-05	0.0035266	TCONS_00025632	14605	Tsc22d3	transcript	6.76223	7.56572	-0.161979	0.00193513	0.0411922
mmu-miR-466i-5p	352.593	42.1158	2.344	5.49e-05	0.00284	TCONS_00007217	78829	Tsc22d4	transcript	0.74051	4.21733	-2.50974	0.0010462	0.0305788
mmu-miR-214-5p	271.213	165.169	0.69303	6.26e-05	0.0028804	TCONS_00007217	78829	Tsc22d4	transcript	0.74051	4.21733	-2.50974	0.0010462	0.0305788
mmu-miR-221-3p	2269.82	1235.67	0.8571	8.52e-05	0.0035266	TCONS_00007217	78829	Tsc22d4	transcript	0.74051	4.21733	-2.50974	0.0010462	0.0305788
mmu-miR-200a-3p	143.74	23.9782	1.9969	0.00056829	0.015685	TCONS_00007217	78829	Tsc22d4	transcript	0.74051	4.21733	-2.50974	0.0010462	0.0305788
mmu-miR-6538	304.502	74.5948	1.8593	7.2e-07	7.45e-05	NM_029836.4	52808	Tspyl2	transcript	3.88684	2.54716	0.609706	0.00214869	0.0436572
mmu-miR-146a-5p	1144.77	2572.83	-1.0815	0.0024408	0.042104	XM_030247230.2	218343	Ttc37	transcript	1.2622	0	Inf	0.000820671	0.0276354
mmu-miR-467a-5p	101.062	157.027	-0.63987	0.0013446	0.026507	XM_030247230.2	218343	Ttc37	transcript	1.2622	0	Inf	0.000820671	0.0276354
mmu-miR-874-3p	67.1603	160.155	-1.1385	0.0024216	0.042104	TCONS_00022612	225049	Ttc7	transcript	1.28356	2.38495	-0.893809	1.15e-05	0.0155632
mmu-miR-214-3p	866.854	544.158	0.66229	0.00013468	0.0046466	TCONS_00022612	225049	Ttc7	transcript	1.28356	2.38495	-0.893809	1.15e-05	0.0155632
mmu-miR-193b-3p	657.266	247.533	1.3911	4.18e-26	1.73e-23	TCONS_00022612	225049	Ttc7	transcript	1.28356	2.38495	-0.893809	1.15e-05	0.0155632
mmu-miR-3470b	336.04	56.7948	2.1526	1.98e-05	0.0013662	TCONS_00022612	225049	Ttc7	transcript	1.28356	2.38495	-0.893809	1.15e-05	0.0155632
mmu-miR-214-3p	866.854	544.158	0.66229	0.00013468	0.0046466	NM_170760.3	233073	U2af1l4	transcript	10.7881	11.8091	-0.13046	0.00194872	0.0413468
mmu-miR-365-1-5p	42.0397	9.35359	1.749	0.00085832	0.022209	NM_019883.4	22186	Uba52	transcript	96.4649	99.2505	-0.0410693	0.000167656	0.0276354
mmu-miR-365-2-5p	8.11913	1.17918	1.9254	0.0018939	0.035639	NM_019883.4	22186	Uba52	transcript	96.4649	99.2505	-0.0410693	0.000167656	0.0276354
mmu-miR-874-3p	67.1603	160.155	-1.1385	0.0024216	0.042104	NM_001169577.1	22214	Ube2h	transcript	1.41218	0.0643033	4.45689	0.00189306	0.0407486
mmu-miR-29b-2-5p	32.6134	115.312	-1.5205	0.0011706	0.026507	NM_001169577.1	22214	Ube2h	transcript	1.41218	0.0643033	4.45689	0.00189306	0.0407486
mmu-miR-690	1195.04	385.602	1.4425	0.0010865	0.02646	NM_001169577.1	22214	Ube2h	transcript	1.41218	0.0643033	4.45689	0.00189306	0.0407486
mmu-miR-214-3p	866.854	544.158	0.66229	0.00013468	0.0046466	NM_001169577.1	22214	Ube2h	transcript	1.41218	0.0643033	4.45689	0.00189306	0.0407486
mmu-miR-1983	29.9641	89.2893	-1.379	0.00016096	0.0051261	NM_001169577.1	22214	Ube2h	transcript	1.41218	0.0643033	4.45689	0.00189306	0.0407486
mmu-miR-3470b	336.04	56.7948	2.1526	1.98e-05	0.0013662	NM_001169577.1	22214	Ube2h	transcript	1.41218	0.0643033	4.45689	0.00189306	0.0407486
mmu-miR-146a-5p	1144.77	2572.83	-1.0815	0.0024408	0.042104	NM_001169577.1	22214	Ube2h	transcript	1.41218	0.0643033	4.45689	0.00189306	0.0407486
mmu-miR-466i-5p	352.593	42.1158	2.344	5.49e-05	0.00284	NM_026275.4	67615	Ube2r2	transcript	5.99431	0.341337	4.13433	0.000853945	0.0281337
mmu-miR-29b-2-5p	32.6134	115.312	-1.5205	0.0011706	0.026507	NM_026275.4	67615	Ube2r2	transcript	5.99431	0.341337	4.13433	0.000853945	0.0281337
mmu-miR-214-3p	866.854	544.158	0.66229	0.00013468	0.0046466	NM_026275.4	67615	Ube2r2	transcript	5.99431	0.341337	4.13433	0.000853945	0.0281337
mmu-miR-193b-3p	657.266	247.533	1.3911	4.18e-26	1.73e-23	NM_026275.4	67615	Ube2r2	transcript	5.99431	0.341337	4.13433	0.000853945	0.0281337
mmu-miR-200a-3p	143.74	23.9782	1.9969	0.00056829	0.015685	NM_026275.4	67615	Ube2r2	transcript	5.99431	0.341337	4.13433	0.000853945	0.0281337
mmu-miR-200b-3p	90.9629	28.7971	1.6296	1.15e-10	1.59e-08	NM_011908.2	24109	Ubl3	transcript	7.77652	18.8816	-1.27979	2.2e-05	0.0155632
mmu-miR-214-3p	866.854	544.158	0.66229	0.00013468	0.0046466	NM_011908.2	24109	Ubl3	transcript	7.77652	18.8816	-1.27979	2.2e-05	0.0155632
mmu-miR-146a-5p	1144.77	2572.83	-1.0815	0.0024408	0.042104	NM_011908.2	24109	Ubl3	transcript	7.77652	18.8816	-1.27979	2.2e-05	0.0155632
mmu-miR-214-5p	271.213	165.169	0.69303	6.26e-05	0.0028804	TCONS_00023033	66530	Ubxn6	transcript	2.99036	0	Inf	0.000820671	0.0276354
mmu-miR-200a-3p	143.74	23.9782	1.9969	0.00056829	0.015685	TCONS_00023033	66530	Ubxn6	transcript	2.99036	0	Inf	0.000820671	0.0276354
mmu-miR-200b-3p	90.9629	28.7971	1.6296	1.15e-10	1.59e-08	XM_030243724.1	80914	Uck2	transcript	2.38203	0.0179517	7.05193	0.000395132	0.0276354
mmu-miR-365-1-5p	42.0397	9.35359	1.749	0.00085832	0.022209	XM_030243724.1	80914	Uck2	transcript	2.38203	0.0179517	7.05193	0.000395132	0.0276354
mmu-miR-690	1195.04	385.602	1.4425	0.0010865	0.02646	XM_030243724.1	80914	Uck2	transcript	2.38203	0.0179517	7.05193	0.000395132	0.0276354
mmu-miR-214-3p	866.854	544.158	0.66229	0.00013468	0.0046466	XM_030243724.1	80914	Uck2	transcript	2.38203	0.0179517	7.05193	0.000395132	0.0276354
novel_1	13879.1	1929.61	2.0063	0.0013125	0.026507	XM_030243724.1	80914	Uck2	transcript	2.38203	0.0179517	7.05193	0.000395132	0.0276354
mmu-miR-1983	29.9641	89.2893	-1.379	0.00016096	0.0051261	XM_030243724.1	80914	Uck2	transcript	2.38203	0.0179517	7.05193	0.000395132	0.0276354
mmu-miR-200a-3p	143.74	23.9782	1.9969	0.00056829	0.015685	XM_030243724.1	80914	Uck2	transcript	2.38203	0.0179517	7.05193	0.000395132	0.0276354
mmu-miR-365-2-5p	8.11913	1.17918	1.9254	0.0018939	0.035639	XM_030243724.1	80914	Uck2	transcript	2.38203	0.0179517	7.05193	0.000395132	0.0276354
mmu-miR-1195	19.6113	1.98363	2.212	0.0004848	0.014336	XM_030243724.1	80914	Uck2	transcript	2.38203	0.0179517	7.05193	0.000395132	0.0276354
mmu-miR-690	1195.04	385.602	1.4425	0.0010865	0.02646	NM_010633.4	16589	Uhmk1	transcript	7.61792	5.62359	0.437905	0.00058092	0.0276354
mmu-miR-214-3p	866.854	544.158	0.66229	0.00013468	0.0046466	NM_010633.4	16589	Uhmk1	transcript	7.61792	5.62359	0.437905	0.00058092	0.0276354
mmu-miR-467b-5p	101.062	157.027	-0.63987	0.0013446	0.026507	NM_010633.4	16589	Uhmk1	transcript	7.61792	5.62359	0.437905	0.00058092	0.0276354
mmu-miR-193b-3p	657.266	247.533	1.3911	4.18e-26	1.73e-23	NM_010633.4	16589	Uhmk1	transcript	7.61792	5.62359	0.437905	0.00058092	0.0276354
mmu-miR-6538	304.502	74.5948	1.8593	7.2e-07	7.45e-05	NM_010633.4	16589	Uhmk1	transcript	7.61792	5.62359	0.437905	0.00058092	0.0276354
mmu-miR-221-3p	2269.82	1235.67	0.8571	8.52e-05	0.0035266	NM_010633.4	16589	Uhmk1	transcript	7.61792	5.62359	0.437905	0.00058092	0.0276354
mmu-miR-3470b	336.04	56.7948	2.1526	1.98e-05	0.0013662	NM_010633.4	16589	Uhmk1	transcript	7.61792	5.62359	0.437905	0.00058092	0.0276354
mmu-miR-146a-5p	1144.77	2572.83	-1.0815	0.0024408	0.042104	NM_010633.4	16589	Uhmk1	transcript	7.61792	5.62359	0.437905	0.00058092	0.0276354
mmu-miR-874-3p	67.1603	160.155	-1.1385	0.0024216	0.042104	XM_036156605.1	217331	Unk	transcript	0.843465	0	Inf	0.000820671	0.0276354
mmu-miR-466i-5p	352.593	42.1158	2.344	5.49e-05	0.00284	XM_036156605.1	217331	Unk	transcript	0.843465	0	Inf	0.000820671	0.0276354
mmu-miR-200a-3p	143.74	23.9782	1.9969	0.00056829	0.015685	XM_036156605.1	217331	Unk	transcript	0.843465	0	Inf	0.000820671	0.0276354
mmu-miR-3470b	336.04	56.7948	2.1526	1.98e-05	0.0013662	XM_036156605.1	217331	Unk	transcript	0.843465	0	Inf	0.000820671	0.0276354
mmu-miR-874-3p	67.1603	160.155	-1.1385	0.0024216	0.042104	NM_025407.2	22273	Uqcrc1	transcript	305.19	377.485	-0.306711	0.000478795	0.0276354
mmu-miR-214-3p	866.854	544.158	0.66229	0.00013468	0.0046466	NM_025407.2	22273	Uqcrc1	transcript	305.19	377.485	-0.306711	0.000478795	0.0276354
novel_1	13879.1	1929.61	2.0063	0.0013125	0.026507	NM_025407.2	22273	Uqcrc1	transcript	305.19	377.485	-0.306711	0.000478795	0.0276354
mmu-miR-1983	29.9641	89.2893	-1.379	0.00016096	0.0051261	NM_025407.2	22273	Uqcrc1	transcript	305.19	377.485	-0.306711	0.000478795	0.0276354
mmu-miR-200b-3p	90.9629	28.7971	1.6296	1.15e-10	1.59e-08	NM_001013024.2	72607	Usp13	transcript	43.9871	44.7173	-0.0237507	0.000631592	0.0276354
mmu-miR-874-3p	67.1603	160.155	-1.1385	0.0024216	0.042104	NM_001013024.2	72607	Usp13	transcript	43.9871	44.7173	-0.0237507	0.000631592	0.0276354
mmu-miR-214-3p	866.854	544.158	0.66229	0.00013468	0.0046466	NM_001013024.2	72607	Usp13	transcript	43.9871	44.7173	-0.0237507	0.000631592	0.0276354
mmu-miR-208a-5p	1.68468	98.5205	-4.8306	5.8e-20	1.2e-17	NM_001013024.2	72607	Usp13	transcript	43.9871	44.7173	-0.0237507	0.000631592	0.0276354
mmu-miR-193b-3p	657.266	247.533	1.3911	4.18e-26	1.73e-23	NM_001013024.2	72607	Usp13	transcript	43.9871	44.7173	-0.0237507	0.000631592	0.0276354
mmu-miR-1983	29.9641	89.2893	-1.379	0.00016096	0.0051261	NM_001013024.2	72607	Usp13	transcript	43.9871	44.7173	-0.0237507	0.000631592	0.0276354
mmu-miR-200a-3p	143.74	23.9782	1.9969	0.00056829	0.015685	NM_001013024.2	72607	Usp13	transcript	43.9871	44.7173	-0.0237507	0.000631592	0.0276354
mmu-miR-467a-5p	101.062	157.027	-0.63987	0.0013446	0.026507	NM_001013024.2	72607	Usp13	transcript	43.9871	44.7173	-0.0237507	0.000631592	0.0276354
mmu-miR-365-1-5p	42.0397	9.35359	1.749	0.00085832	0.022209	XM_006522138.4	252870	Usp7	transcript	1.00697	0	Inf	0.000820671	0.0276354
mmu-miR-690	1195.04	385.602	1.4425	0.0010865	0.02646	XM_006522138.4	252870	Usp7	transcript	1.00697	0	Inf	0.000820671	0.0276354
mmu-miR-214-3p	866.854	544.158	0.66229	0.00013468	0.0046466	XM_006522138.4	252870	Usp7	transcript	1.00697	0	Inf	0.000820671	0.0276354
mmu-miR-208a-5p	1.68468	98.5205	-4.8306	5.8e-20	1.2e-17	XM_006522138.4	252870	Usp7	transcript	1.00697	0	Inf	0.000820671	0.0276354
mmu-miR-1983	29.9641	89.2893	-1.379	0.00016096	0.0051261	XM_006522138.4	252870	Usp7	transcript	1.00697	0	Inf	0.000820671	0.0276354
mmu-miR-200a-3p	143.74	23.9782	1.9969	0.00056829	0.015685	XM_006522138.4	252870	Usp7	transcript	1.00697	0	Inf	0.000820671	0.0276354
mmu-miR-3470b	336.04	56.7948	2.1526	1.98e-05	0.0013662	XM_006522138.4	252870	Usp7	transcript	1.00697	0	Inf	0.000820671	0.0276354
mmu-miR-365-2-5p	8.11913	1.17918	1.9254	0.0018939	0.035639	XM_006522138.4	252870	Usp7	transcript	1.00697	0	Inf	0.000820671	0.0276354
mmu-miR-200b-3p	90.9629	28.7971	1.6296	1.15e-10	1.59e-08	TCONS_00024982	22284	Usp9x	transcript	4.42644	0.000426333	13.3419	0.000818366	0.0276354
mmu-miR-29b-2-5p	32.6134	115.312	-1.5205	0.0011706	0.026507	TCONS_00024982	22284	Usp9x	transcript	4.42644	0.000426333	13.3419	0.000818366	0.0276354
mmu-miR-690	1195.04	385.602	1.4425	0.0010865	0.02646	TCONS_00024982	22284	Usp9x	transcript	4.42644	0.000426333	13.3419	0.000818366	0.0276354
mmu-miR-1983	29.9641	89.2893	-1.379	0.00016096	0.0051261	TCONS_00024982	22284	Usp9x	transcript	4.42644	0.000426333	13.3419	0.000818366	0.0276354
mmu-miR-221-3p	2269.82	1235.67	0.8571	8.52e-05	0.0035266	TCONS_00024982	22284	Usp9x	transcript	4.42644	0.000426333	13.3419	0.000818366	0.0276354
mmu-miR-200a-3p	143.74	23.9782	1.9969	0.00056829	0.015685	TCONS_00024982	22284	Usp9x	transcript	4.42644	0.000426333	13.3419	0.000818366	0.0276354
mmu-miR-466i-5p	352.593	42.1158	2.344	5.49e-05	0.00284	NM_009497.3	22318	Vamp2	transcript	20.8289	15.7704	0.401368	0.00092529	0.0292165
mmu-miR-365-1-5p	42.0397	9.35359	1.749	0.00085832	0.022209	NM_009497.3	22318	Vamp2	transcript	20.8289	15.7704	0.401368	0.00092529	0.0292165
mmu-miR-467b-5p	101.062	157.027	-0.63987	0.0013446	0.026507	NM_009497.3	22318	Vamp2	transcript	20.8289	15.7704	0.401368	0.00092529	0.0292165
mmu-miR-208a-5p	1.68468	98.5205	-4.8306	5.8e-20	1.2e-17	NM_009497.3	22318	Vamp2	transcript	20.8289	15.7704	0.401368	0.00092529	0.0292165
mmu-miR-365-2-5p	8.11913	1.17918	1.9254	0.0018939	0.035639	NM_009497.3	22318	Vamp2	transcript	20.8289	15.7704	0.401368	0.00092529	0.0292165
mmu-miR-466i-5p	352.593	42.1158	2.344	5.49e-05	0.00284	NM_011697.3	22340	Vegfb	transcript	35.662	39.908	-0.162292	0.00168592	0.0382088
mmu-miR-29b-2-5p	32.6134	115.312	-1.5205	0.0011706	0.026507	NM_016686.4	22344	Vezf1	transcript	10.1809	9.06881	0.166877	0.0015653	0.0372453
mmu-miR-221-3p	2269.82	1235.67	0.8571	8.52e-05	0.0035266	NM_016686.4	22344	Vezf1	transcript	10.1809	9.06881	0.166877	0.0015653	0.0372453
mmu-miR-3470b	336.04	56.7948	2.1526	1.98e-05	0.0013662	NM_016686.4	22344	Vezf1	transcript	10.1809	9.06881	0.166877	0.0015653	0.0372453
mmu-miR-200b-3p	90.9629	28.7971	1.6296	1.15e-10	1.59e-08	NM_001161420.1	22359	Vldlr	transcript	2.8505	7.64704	-1.42369	0.000891982	0.0287892
mmu-miR-214-3p	866.854	544.158	0.66229	0.00013468	0.0046466	NM_001161420.1	22359	Vldlr	transcript	2.8505	7.64704	-1.42369	0.000891982	0.0287892
mmu-miR-1983	29.9641	89.2893	-1.379	0.00016096	0.0051261	NM_001161420.1	22359	Vldlr	transcript	2.8505	7.64704	-1.42369	0.000891982	0.0287892
mmu-miR-200a-3p	143.74	23.9782	1.9969	0.00056829	0.015685	NM_001161420.1	22359	Vldlr	transcript	2.8505	7.64704	-1.42369	0.000891982	0.0287892
mmu-miR-3470b	336.04	56.7948	2.1526	1.98e-05	0.0013662	NM_001161420.1	22359	Vldlr	transcript	2.8505	7.64704	-1.42369	0.000891982	0.0287892
mmu-miR-467a-5p	101.062	157.027	-0.63987	0.0013446	0.026507	NM_001161420.1	22359	Vldlr	transcript	2.8505	7.64704	-1.42369	0.000891982	0.0287892
mmu-miR-3470b	336.04	56.7948	2.1526	1.98e-05	0.0013662	NM_001379411.1	224705	Vps52	transcript	2.31534	0	Inf	0.000343337	0.0276354
mmu-miR-467a-5p	101.062	157.027	-0.63987	0.0013446	0.026507	NM_001379411.1	224705	Vps52	transcript	2.31534	0	Inf	0.000343337	0.0276354
mmu-miR-3470b	336.04	56.7948	2.1526	1.98e-05	0.0013662	NM_009336.2	21427	Vps72	transcript	7.63854	6.31774	0.273889	0.00111036	0.0316263
mmu-miR-200b-3p	90.9629	28.7971	1.6296	1.15e-10	1.59e-08	TCONS_00017959	53612	Vti1b	transcript	1.97266	0	Inf	0.000820671	0.0276354
mmu-miR-874-3p	67.1603	160.155	-1.1385	0.0024216	0.042104	NM_027113.2	69544	Wdr5b	transcript	2.3334	0.0822317	4.8266	0.00171747	0.0384046
mmu-miR-466i-5p	352.593	42.1158	2.344	5.49e-05	0.00284	NM_027113.2	69544	Wdr5b	transcript	2.3334	0.0822317	4.8266	0.00171747	0.0384046
mmu-miR-874-3p	67.1603	160.155	-1.1385	0.0024216	0.042104	NM_026582.5	68151	Wls	transcript	7.4038	5.38228	0.460048	0.000248241	0.0276354
mmu-miR-208a-5p	1.68468	98.5205	-4.8306	5.8e-20	1.2e-17	NM_026582.5	68151	Wls	transcript	7.4038	5.38228	0.460048	0.000248241	0.0276354
mmu-miR-1983	29.9641	89.2893	-1.379	0.00016096	0.0051261	NM_026582.5	68151	Wls	transcript	7.4038	5.38228	0.460048	0.000248241	0.0276354
mmu-miR-146a-5p	1144.77	2572.83	-1.0815	0.0024408	0.042104	NM_026582.5	68151	Wls	transcript	7.4038	5.38228	0.460048	0.000248241	0.0276354
mmu-miR-467a-5p	101.062	157.027	-0.63987	0.0013446	0.026507	NM_026582.5	68151	Wls	transcript	7.4038	5.38228	0.460048	0.000248241	0.0276354
mmu-miR-29b-2-5p	32.6134	115.312	-1.5205	0.0011706	0.026507	NM_001083919.1	241431	Xirp2	transcript	71.3789	94.7049	-0.407941	0.000357728	0.0276354
mmu-miR-690	1195.04	385.602	1.4425	0.0010865	0.02646	NM_001083919.1	241431	Xirp2	transcript	71.3789	94.7049	-0.407941	0.000357728	0.0276354
mmu-miR-3470b	336.04	56.7948	2.1526	1.98e-05	0.0013662	NM_001083919.1	241431	Xirp2	transcript	71.3789	94.7049	-0.407941	0.000357728	0.0276354
mmu-miR-874-3p	67.1603	160.155	-1.1385	0.0024216	0.042104	TCONS_00020016	65246	Xpo7	transcript	4.13029	0.00722533	9.15896	0.00116536	0.0326432
mmu-miR-466i-5p	352.593	42.1158	2.344	5.49e-05	0.00284	TCONS_00020016	65246	Xpo7	transcript	4.13029	0.00722533	9.15896	0.00116536	0.0326432
mmu-miR-365-1-5p	42.0397	9.35359	1.749	0.00085832	0.022209	TCONS_00020016	65246	Xpo7	transcript	4.13029	0.00722533	9.15896	0.00116536	0.0326432
mmu-miR-29b-2-5p	32.6134	115.312	-1.5205	0.0011706	0.026507	TCONS_00020016	65246	Xpo7	transcript	4.13029	0.00722533	9.15896	0.00116536	0.0326432
mmu-miR-690	1195.04	385.602	1.4425	0.0010865	0.02646	TCONS_00020016	65246	Xpo7	transcript	4.13029	0.00722533	9.15896	0.00116536	0.0326432
mmu-miR-214-3p	866.854	544.158	0.66229	0.00013468	0.0046466	TCONS_00020016	65246	Xpo7	transcript	4.13029	0.00722533	9.15896	0.00116536	0.0326432
mmu-miR-467b-5p	101.062	157.027	-0.63987	0.0013446	0.026507	TCONS_00020016	65246	Xpo7	transcript	4.13029	0.00722533	9.15896	0.00116536	0.0326432
mmu-miR-208a-5p	1.68468	98.5205	-4.8306	5.8e-20	1.2e-17	TCONS_00020016	65246	Xpo7	transcript	4.13029	0.00722533	9.15896	0.00116536	0.0326432
mmu-miR-1983	29.9641	89.2893	-1.379	0.00016096	0.0051261	TCONS_00020016	65246	Xpo7	transcript	4.13029	0.00722533	9.15896	0.00116536	0.0326432
mmu-miR-221-3p	2269.82	1235.67	0.8571	8.52e-05	0.0035266	TCONS_00020016	65246	Xpo7	transcript	4.13029	0.00722533	9.15896	0.00116536	0.0326432
mmu-miR-3470b	336.04	56.7948	2.1526	1.98e-05	0.0013662	TCONS_00020016	65246	Xpo7	transcript	4.13029	0.00722533	9.15896	0.00116536	0.0326432
mmu-miR-365-2-5p	8.11913	1.17918	1.9254	0.0018939	0.035639	TCONS_00020016	65246	Xpo7	transcript	4.13029	0.00722533	9.15896	0.00116536	0.0326432
mmu-miR-3470b	336.04	56.7948	2.1526	1.98e-05	0.0013662	NM_178363.4	56531	Ylpm1	transcript	2.18322	3.52527	-0.691274	0.000873563	0.0284985
mmu-miR-221-3p	2269.82	1235.67	0.8571	8.52e-05	0.0035266	TCONS_00007156	71970	Zbed5	transcript	2.32651	0	Inf	0.000820671	0.0276354
mmu-miR-874-3p	67.1603	160.155	-1.1385	0.0024216	0.042104	XM_006534391.5	75580	Zbtb4	transcript	1.27003	0	Inf	0.000820671	0.0276354
mmu-miR-466i-5p	352.593	42.1158	2.344	5.49e-05	0.00284	XM_006534391.5	75580	Zbtb4	transcript	1.27003	0	Inf	0.000820671	0.0276354
mmu-miR-214-3p	866.854	544.158	0.66229	0.00013468	0.0046466	XM_006534391.5	75580	Zbtb4	transcript	1.27003	0	Inf	0.000820671	0.0276354
mmu-miR-208a-5p	1.68468	98.5205	-4.8306	5.8e-20	1.2e-17	XM_006534391.5	75580	Zbtb4	transcript	1.27003	0	Inf	0.000820671	0.0276354
mmu-miR-214-5p	271.213	165.169	0.69303	6.26e-05	0.0028804	XM_006534391.5	75580	Zbtb4	transcript	1.27003	0	Inf	0.000820671	0.0276354
mmu-miR-221-3p	2269.82	1235.67	0.8571	8.52e-05	0.0035266	XM_006534391.5	75580	Zbtb4	transcript	1.27003	0	Inf	0.000820671	0.0276354
mmu-miR-3470b	336.04	56.7948	2.1526	1.98e-05	0.0013662	XM_006534391.5	75580	Zbtb4	transcript	1.27003	0	Inf	0.000820671	0.0276354
mmu-miR-467a-5p	101.062	157.027	-0.63987	0.0013446	0.026507	XM_006534391.5	75580	Zbtb4	transcript	1.27003	0	Inf	0.000820671	0.0276354
mmu-miR-200b-3p	90.9629	28.7971	1.6296	1.15e-10	1.59e-08	TCONS_00001243	70579	Zc3h11a	transcript	3.03869	0	Inf	0.000820671	0.0276354
mmu-miR-690	1195.04	385.602	1.4425	0.0010865	0.02646	TCONS_00001243	70579	Zc3h11a	transcript	3.03869	0	Inf	0.000820671	0.0276354
mmu-miR-193b-3p	657.266	247.533	1.3911	4.18e-26	1.73e-23	TCONS_00001243	70579	Zc3h11a	transcript	3.03869	0	Inf	0.000820671	0.0276354
mmu-miR-221-3p	2269.82	1235.67	0.8571	8.52e-05	0.0035266	TCONS_00001243	70579	Zc3h11a	transcript	3.03869	0	Inf	0.000820671	0.0276354
mmu-miR-690	1195.04	385.602	1.4425	0.0010865	0.02646	TCONS_00018911	238673	Zfp367	transcript	0.820108	0	Inf	0.000820671	0.0276354
mmu-miR-467b-5p	101.062	157.027	-0.63987	0.0013446	0.026507	TCONS_00018911	238673	Zfp367	transcript	0.820108	0	Inf	0.000820671	0.0276354
mmu-miR-208a-5p	1.68468	98.5205	-4.8306	5.8e-20	1.2e-17	TCONS_00018911	238673	Zfp367	transcript	0.820108	0	Inf	0.000820671	0.0276354
mmu-miR-200a-3p	143.74	23.9782	1.9969	0.00056829	0.015685	TCONS_00018911	238673	Zfp367	transcript	0.820108	0	Inf	0.000820671	0.0276354
mmu-miR-146a-5p	1144.77	2572.83	-1.0815	0.0024408	0.042104	TCONS_00018911	238673	Zfp367	transcript	0.820108	0	Inf	0.000820671	0.0276354
mmu-miR-467a-5p	101.062	157.027	-0.63987	0.0013446	0.026507	TCONS_00018911	238673	Zfp367	transcript	0.820108	0	Inf	0.000820671	0.0276354
mmu-miR-466i-5p	352.593	42.1158	2.344	5.49e-05	0.00284	NM_007564.5	12192	Zfp36l1	transcript	26.6034	19.2243	0.468681	0.000331831	0.0276354
mmu-miR-208a-5p	1.68468	98.5205	-4.8306	5.8e-20	1.2e-17	NM_007564.5	12192	Zfp36l1	transcript	26.6034	19.2243	0.468681	0.000331831	0.0276354
mmu-miR-200a-3p	143.74	23.9782	1.9969	0.00056829	0.015685	XM_036165918.1	18139	Zfp638	transcript	1.40394	0	Inf	0.000652152	0.0276354
mmu-miR-466i-5p	352.593	42.1158	2.344	5.49e-05	0.00284	NM_053009.3	109910	Zfp91	transcript	24.0255	23.1627	0.0527611	0.000930839	0.0292165
mmu-miR-365-1-5p	42.0397	9.35359	1.749	0.00085832	0.022209	NM_053009.3	109910	Zfp91	transcript	24.0255	23.1627	0.0527611	0.000930839	0.0292165
mmu-miR-690	1195.04	385.602	1.4425	0.0010865	0.02646	NM_053009.3	109910	Zfp91	transcript	24.0255	23.1627	0.0527611	0.000930839	0.0292165
mmu-miR-214-3p	866.854	544.158	0.66229	0.00013468	0.0046466	NM_053009.3	109910	Zfp91	transcript	24.0255	23.1627	0.0527611	0.000930839	0.0292165
mmu-miR-193b-3p	657.266	247.533	1.3911	4.18e-26	1.73e-23	NM_053009.3	109910	Zfp91	transcript	24.0255	23.1627	0.0527611	0.000930839	0.0292165
mmu-miR-214-5p	271.213	165.169	0.69303	6.26e-05	0.0028804	NM_053009.3	109910	Zfp91	transcript	24.0255	23.1627	0.0527611	0.000930839	0.0292165
mmu-miR-221-3p	2269.82	1235.67	0.8571	8.52e-05	0.0035266	NM_053009.3	109910	Zfp91	transcript	24.0255	23.1627	0.0527611	0.000930839	0.0292165
mmu-miR-146a-5p	1144.77	2572.83	-1.0815	0.0024408	0.042104	NM_053009.3	109910	Zfp91	transcript	24.0255	23.1627	0.0527611	0.000930839	0.0292165
mmu-miR-365-2-5p	8.11913	1.17918	1.9254	0.0018939	0.035639	NM_053009.3	109910	Zfp91	transcript	24.0255	23.1627	0.0527611	0.000930839	0.0292165
mmu-miR-467a-5p	101.062	157.027	-0.63987	0.0013446	0.026507	NM_053009.3	109910	Zfp91	transcript	24.0255	23.1627	0.0527611	0.000930839	0.0292165
mmu-miR-200b-3p	90.9629	28.7971	1.6296	1.15e-10	1.59e-08	NM_001033634.3	414872	Zyg11b	transcript	7.93958	9.88309	-0.3159	0.00219575	0.0438821
mmu-miR-466i-5p	352.593	42.1158	2.344	5.49e-05	0.00284	NM_001033634.3	414872	Zyg11b	transcript	7.93958	9.88309	-0.3159	0.00219575	0.0438821
mmu-miR-690	1195.04	385.602	1.4425	0.0010865	0.02646	NM_001033634.3	414872	Zyg11b	transcript	7.93958	9.88309	-0.3159	0.00219575	0.0438821
mmu-miR-208a-5p	1.68468	98.5205	-4.8306	5.8e-20	1.2e-17	NM_001033634.3	414872	Zyg11b	transcript	7.93958	9.88309	-0.3159	0.00219575	0.0438821
mmu-miR-193b-3p	657.266	247.533	1.3911	4.18e-26	1.73e-23	NM_001033634.3	414872	Zyg11b	transcript	7.93958	9.88309	-0.3159	0.00219575	0.0438821
mmu-miR-214-5p	271.213	165.169	0.69303	6.26e-05	0.0028804	NM_001033634.3	414872	Zyg11b	transcript	7.93958	9.88309	-0.3159	0.00219575	0.0438821
mmu-miR-1983	29.9641	89.2893	-1.379	0.00016096	0.0051261	NM_001033634.3	414872	Zyg11b	transcript	7.93958	9.88309	-0.3159	0.00219575	0.0438821
mmu-miR-200a-3p	143.74	23.9782	1.9969	0.00056829	0.015685	NM_001033634.3	414872	Zyg11b	transcript	7.93958	9.88309	-0.3159	0.00219575	0.0438821
mmu-miR-3470b	336.04	56.7948	2.1526	1.98e-05	0.0013662	NM_001033634.3	414872	Zyg11b	transcript	7.93958	9.88309	-0.3159	0.00219575	0.0438821
mmu-miR-146a-5p	1144.77	2572.83	-1.0815	0.0024408	0.042104	NM_001033634.3	414872	Zyg11b	transcript	7.93958	9.88309	-0.3159	0.00219575	0.0438821
mmu-miR-467a-5p	101.062	157.027	-0.63987	0.0013446	0.026507	NM_001033634.3	414872	Zyg11b	transcript	7.93958	9.88309	-0.3159	0.00219575	0.0438821

## Sheet: HyperTH vs HypoTH
sRNA	HyperTH_readcount	HypoTH_readcount	log2FoldChange	pval	padj	Transcript	gene_id	gene_name	feature	HyperTH.value	HypoTH.value	log2foldchange	pvalue	qvalue
mmu-miR-199a-5p	719.344	3788.92	-2.0052	9.0277e-05	0.0018669	NM_194054.3	68585	1110002E22Rik	transcript	9.3627	19.3943	-1.05064	3.22486e-05	0.0109036
mmu-miR-199a-5p	719.344	3788.92	-2.0052	9.0277e-05	0.0018669	NM_020496.3	57246	1110002E22Rik	transcript	0.561424	1.58799	-1.50004	0.000600662	0.0199437
mmu-miR-199a-5p	719.344	3788.92	-2.0052	9.0277e-05	0.0018669	TCONS_00013920	235682	1110002E22Rik	transcript	5.17837	0.595973	3.11918	0.00126708	0.0299678
mmu-miR-199a-5p	719.344	3788.92	-2.0052	9.0277e-05	0.0018669	NM_001080131.2	21917	1110002E22Rik	transcript	0	2.27004	#NAME?	6.13974e-05	0.011849
mmu-miR-199a-5p	719.344	3788.92	-2.0052	9.0277e-05	0.0018669	TCONS_00001243	70579	1110002E22Rik	transcript	0	3.03869	#NAME?	0.000208101	0.011849
mmu-miR-199a-5p	719.344	3788.92	-2.0052	9.0277e-05	0.0018669	TCONS_00013489	75717	1110002E22Rik	transcript	0.00558833	1.23235	-7.78477	0.000152409	0.011849
mmu-miR-199a-5p	719.344	3788.92	-2.0052	9.0277e-05	0.0018669	NM_019879.3	56451	1110002E22Rik	transcript	134.37	86.8185	0.630134	0.000619787	0.0200927
mmu-miR-199a-5p	719.344	3788.92	-2.0052	9.0277e-05	0.0018669	NM_001359509.1	67972	1110002E22Rik	transcript	0	1.05284	#NAME?	0.000208101	0.011849
mmu-miR-199a-5p	719.344	3788.92	-2.0052	9.0277e-05	0.0018669	NM_173866.4	108682	1110002E22Rik	transcript	15.5947	1.46859	3.40854	0.000996956	0.0266488
mmu-miR-199a-5p	719.344	3788.92	-2.0052	9.0277e-05	0.0018669	NM_001293772.2	72333	1110002E22Rik	transcript	35.5179	1.16907	4.92511	5.52548e-07	0.00539962
mmu-miR-199a-5p	719.344	3788.92	-2.0052	9.0277e-05	0.0018669	NM_008467.4	16649	1110002E22Rik	transcript	40.2608	22.3532	0.848894	0.00138369	0.0314147
mmu-miR-199a-5p	719.344	3788.92	-2.0052	9.0277e-05	0.0018669	NM_023824.3	76498	1700025G04Rik	transcript	11.489	5.29525	1.11749	0.00313365	0.049005
mmu-miR-199a-5p	719.344	3788.92	-2.0052	9.0277e-05	0.0018669	NM_001364412.1	102093	1700025G04Rik	transcript	22.1699	10.0295	1.14436	0.000895407	0.0252694
mmu-miR-199a-5p	719.344	3788.92	-2.0052	9.0277e-05	0.0018669	NM_001324531.1	19340	1700025G04Rik	transcript	4.60047	5.82791	-0.341197	0.00247029	0.0430463
mmu-miR-199a-5p	719.344	3788.92	-2.0052	9.0277e-05	0.0018669	NM_053009.3	109910	1700025G04Rik	transcript	33.71	24.0255	0.48861	0.00022276	0.0120256
mmu-miR-199a-5p	719.344	3788.92	-2.0052	9.0277e-05	0.0018669	XM_006507189.4	109264	1700025G04Rik	transcript	12.3611	5.99776	1.04331	1.94183e-05	0.00898899
mmu-miR-199a-5p	719.344	3788.92	-2.0052	9.0277e-05	0.0018669	NM_001114174.1	381217	1700025G04Rik	transcript	12.8644	15.5508	-0.27361	0.00274393	0.0453069
mmu-miR-199a-5p	719.344	3788.92	-2.0052	9.0277e-05	0.0018669	XM_011239446.4	228026	1700025G04Rik	transcript	0	3.2763	#NAME?	0.000208101	0.011849
mmu-miR-199a-5p	719.344	3788.92	-2.0052	9.0277e-05	0.0018669	NM_020486.2	57278	1700025G04Rik	transcript	57.6931	97.5158	-0.757239	0.00022765	0.0120256
mmu-miR-199a-5p	719.344	3788.92	-2.0052	9.0277e-05	0.0018669	NM_026792.3	52123	1700025G04Rik	transcript	6.0244	3.29056	0.872483	0.0020744	0.039184
mmu-miR-199a-5p	719.344	3788.92	-2.0052	9.0277e-05	0.0018669	XM_006500766.4	18415	1700025G04Rik	transcript	4.38991	2.19873	0.997525	0.00152571	0.0331249
mmu-miR-199a-5p	719.344	3788.92	-2.0052	9.0277e-05	0.0018669	XM_036165700.1	320404	1700025G04Rik	transcript	0	6.46645	#NAME?	0.000252332	0.0125803
mmu-miR-199a-5p	719.344	3788.92	-2.0052	9.0277e-05	0.0018669	NM_028758.2	74105	1700025G04Rik	transcript	8.41225	10.3445	-0.298296	0.000569408	0.0197716
mmu-miR-199a-5p	719.344	3788.92	-2.0052	9.0277e-05	0.0018669	NM_001362974.1	67733	1700025G04Rik	transcript	2.16401	3.2316	-0.578541	0.0010405	0.0272977
mmu-miR-199a-5p	719.344	3788.92	-2.0052	9.0277e-05	0.0018669	NM_012010.3	26905	1700025G04Rik	transcript	23.73	17.4638	0.442349	0.00230633	0.0414115
mmu-miR-199a-5p	719.344	3788.92	-2.0052	9.0277e-05	0.0018669	XM_006539897.3	233103	1700025G04Rik	transcript	0.00112633	0.853869	-9.56624	0.000196093	0.011849
mmu-miR-199a-5p	719.344	3788.92	-2.0052	9.0277e-05	0.0018669	NM_025647.3	66588	1700025G04Rik	transcript	13.6657	14.2706	-0.0624846	0.000535393	0.0191482
mmu-miR-199a-5p	719.344	3788.92	-2.0052	9.0277e-05	0.0018669	NM_001358780.1	17181	1700025G04Rik	transcript	4.14943	3.85625	0.105713	0.00311384	0.0489067
mmu-miR-199a-5p	719.344	3788.92	-2.0052	9.0277e-05	0.0018669	NM_145401.2	108099	1700025G04Rik	transcript	3.05641	0.26636	3.52039	0.000663898	0.0209475
mmu-miR-199a-5p	719.344	3788.92	-2.0052	9.0277e-05	0.0018669	NM_011436.4	20660	1700025G04Rik	transcript	2.80025	0.980742	1.51361	0.000432615	0.0168945
mmu-miR-199a-5p	719.344	3788.92	-2.0052	9.0277e-05	0.0018669	NM_001013390.3	399548	1700025G04Rik	transcript	45.134	2.15251	4.39012	0.000262235	0.0127318
mmu-miR-199a-5p	719.344	3788.92	-2.0052	9.0277e-05	0.0018669	XM_036158779.1	64652	1700025G04Rik	transcript	0.085711	1.0889	-3.66725	3.06078e-05	0.0109036
mmu-miR-199a-5p	719.344	3788.92	-2.0052	9.0277e-05	0.0018669	NM_024448.2	19328	1700025G04Rik	transcript	69.553	39.0894	0.831336	0.0011958	0.0291166
mmu-miR-199a-5p	719.344	3788.92	-2.0052	9.0277e-05	0.0018669	NM_133218.2	170753	1700025G04Rik	transcript	4.21261	7.10953	-0.755041	0.00042631	0.0168243
mmu-miR-199a-5p	719.344	3788.92	-2.0052	9.0277e-05	0.0018669	TCONS_00001032	21961	1700025G04Rik	transcript	45.687	0.543971	6.39211	0.000464811	0.017514
mmu-miR-199a-5p	719.344	3788.92	-2.0052	9.0277e-05	0.0018669	NM_001355755.1	17896	1700025G04Rik	transcript	0.163441	9.13829	-5.80508	1.67772e-05	0.00898899
mmu-miR-199a-5p	719.344	3788.92	-2.0052	9.0277e-05	0.0018669	XM_006500784.4	269424	1700025G04Rik	transcript	0.0240483	2.34219	-6.60578	0.00298096	0.047773
mmu-miR-199a-5p	719.344	3788.92	-2.0052	9.0277e-05	0.0018669	NM_010217.2	14219	1700025G04Rik	transcript	13.8161	47.3045	-1.77562	0.00230935	0.0414133
mmu-miR-199a-5p	719.344	3788.92	-2.0052	9.0277e-05	0.0018669	TCONS_00012919	17999	1700123O20Rik	transcript	121.808	126.953	-0.0596877	0.000984095	0.0263548
mmu-miR-199a-5p	719.344	3788.92	-2.0052	9.0277e-05	0.0018669	NM_011677.2	22256	1700123O20Rik	transcript	6.75487	1.60334	2.07485	0.000916834	0.0256189
mmu-miR-199a-5p	719.344	3788.92	-2.0052	9.0277e-05	0.0018669	NM_011671.5	22228	4930453N24Rik	transcript	22.7224	7.62895	1.57456	0.00309646	0.0487417
mmu-miR-199a-5p	719.344	3788.92	-2.0052	9.0277e-05	0.0018669	NM_019814.5	56295	4930453N24Rik	transcript	21.9379	12.4784	0.813993	0.00159463	0.0337685
mmu-miR-199a-5p	719.344	3788.92	-2.0052	9.0277e-05	0.0018669	NM_001159724.1	19294	4930453N24Rik	transcript	8.01008	11.2298	-0.487446	0.00303448	0.0482486
mmu-miR-199a-5p	719.344	3788.92	-2.0052	9.0277e-05	0.0018669	TCONS_00016218	18016	4930453N24Rik	transcript	0	3.89182	#NAME?	0.000208101	0.011849
mmu-miR-199a-5p	719.344	3788.92	-2.0052	9.0277e-05	0.0018669	TCONS_00004645	71807	4930453N24Rik	transcript	2.75995	1.1594	1.25126	0.00307992	0.0485894
mmu-miR-199a-5p	719.344	3788.92	-2.0052	9.0277e-05	0.0018669	TCONS_00011063	21843	4930453N24Rik	transcript	0	1.86295	#NAME?	0.000394296	0.0162795
mmu-miR-199a-5p	719.344	3788.92	-2.0052	9.0277e-05	0.0018669	TCONS_00007852	59008	4930453N24Rik	transcript	0	3.69736	#NAME?	0.000208101	0.011849
mmu-miR-199a-5p	719.344	3788.92	-2.0052	9.0277e-05	0.0018669	NM_001081242.2	70549	4930453N24Rik	transcript	0.0245157	2.63951	-6.75042	0.000142942	0.011849
mmu-miR-199a-5p	719.344	3788.92	-2.0052	9.0277e-05	0.0018669	XM_011245729.1	71474	4930453N24Rik	transcript	0.0370433	1.37594	-5.21506	0.000304843	0.0138865
mmu-miR-199a-5p	719.344	3788.92	-2.0052	9.0277e-05	0.0018669	TCONS_00001922	227937	4930453N24Rik	transcript	1.80779	2.78593	-0.623933	0.0019647	0.0378189
mmu-miR-199a-5p	719.344	3788.92	-2.0052	9.0277e-05	0.0018669	XM_030248555.2	239555	4930453N24Rik	transcript	0	1.40417	#NAME?	0.000208101	0.011849
mmu-miR-199a-5p	719.344	3788.92	-2.0052	9.0277e-05	0.0018669	TCONS_00020946	78929	4930453N24Rik	transcript	28.6124	16.9856	0.752328	0.00258292	0.0439811
mmu-miR-199a-5p	719.344	3788.92	-2.0052	9.0277e-05	0.0018669	TCONS_00013940	17281	Aar2	transcript	0	4.89149	#NAME?	0.000208101	0.011849
mmu-miR-199a-5p	719.344	3788.92	-2.0052	9.0277e-05	0.0018669	NM_007798.3	13030	Aar2	transcript	103.575	44.5757	1.21635	0.000581467	0.0198239
mmu-miR-199a-5p	719.344	3788.92	-2.0052	9.0277e-05	0.0018669	XM_006527267.5	66866	Aar2	transcript	4.92495	2.38861	1.04394	0.000595022	0.0199437
mmu-miR-199a-5p	719.344	3788.92	-2.0052	9.0277e-05	0.0018669	NM_001163332.1	80281	Aar2	transcript	0	3.51781	#NAME?	0.00164595	0.0341909
mmu-miR-199a-5p	719.344	3788.92	-2.0052	9.0277e-05	0.0018669	XM_036161263.1	67869	Aar2	transcript	0	4.11472	#NAME?	0.000208101	0.011849
mmu-miR-199a-5p	719.344	3788.92	-2.0052	9.0277e-05	0.0018669	NM_001357448.1	59057	Aar2	transcript	0.89975	1.66028	-0.883828	0.00145457	0.0324519
mmu-miR-199a-5p	719.344	3788.92	-2.0052	9.0277e-05	0.0018669	NM_001162532.1	100038347	Aar2	transcript	77.6951	75.6235	0.0389891	0.000481253	0.0178948
mmu-miR-199a-5p	719.344	3788.92	-2.0052	9.0277e-05	0.0018669	NM_001164441.1	67434	Aar2	transcript	8.59489	4.39847	0.966478	0.00240277	0.0424412
mmu-miR-199a-5p	719.344	3788.92	-2.0052	9.0277e-05	0.0018669	XM_006511156.2	24127	Aar2	transcript	0	1.84218	#NAME?	0.000225398	0.0120256
mmu-miR-199a-5p	719.344	3788.92	-2.0052	9.0277e-05	0.0018669	NM_001024504.2	102323	Aar2	transcript	18.3441	6.86252	1.41851	0.000108632	0.011849
mmu-miR-199a-5p	719.344	3788.92	-2.0052	9.0277e-05	0.0018669	NM_181328.3	214663	Aar2	transcript	5.28174	1.29638	2.02652	0.00193551	0.0375621
mmu-miR-199a-5p	719.344	3788.92	-2.0052	9.0277e-05	0.0018669	NM_008338.4	15980	Aar2	transcript	96.4823	40.1831	1.26368	7.19671e-05	0.011849
mmu-miR-199a-5p	719.344	3788.92	-2.0052	9.0277e-05	0.0018669	NM_008444.4	16569	Aar2	transcript	3.70473	1.55262	1.25466	0.000617896	0.0200774
mmu-miR-199a-5p	719.344	3788.92	-2.0052	9.0277e-05	0.0018669	TCONS_00005936	242474	Abcc4	transcript	1.57062	2.8449	-0.857041	0.000608684	0.0199437
mmu-miR-199a-5p	719.344	3788.92	-2.0052	9.0277e-05	0.0018669	NM_177740.5	244058	Abcc4	transcript	7.57193	3.28122	1.20643	0.00224012	0.0407375
mmu-miR-199a-5p	719.344	3788.92	-2.0052	9.0277e-05	0.0018669	XM_006507470.5	19647	Abcc4	transcript	4.54464	4.46107	0.0267746	0.0020459	0.0388008
mmu-miR-199a-5p	719.344	3788.92	-2.0052	9.0277e-05	0.0018669	NM_001127346.1	75597	Abcc4	transcript	1.89839	6.35692	-1.74355	0.000426338	0.0168243
mmu-miR-199a-5p	719.344	3788.92	-2.0052	9.0277e-05	0.0018669	NM_053159.4	94062	Abcc4	transcript	44.4713	20.8991	1.08943	1.53811e-06	0.00606699
mmu-miR-199a-5p	719.344	3788.92	-2.0052	9.0277e-05	0.0018669	NM_144545.4	78655	Abcc4	transcript	20.27	12.1274	0.741077	0.000310056	0.0139803
mmu-miR-199a-5p	719.344	3788.92	-2.0052	9.0277e-05	0.0018669	XM_030246557.2	14245	Abcc4	transcript	1.81547	3.28901	-0.85731	0.000575053	0.0198218
mmu-miR-199a-5p	719.344	3788.92	-2.0052	9.0277e-05	0.0018669	NM_138651.7	110911	Abcc4	transcript	29.7644	31.9439	-0.101955	0.00102009	0.0269116
mmu-miR-199a-5p	719.344	3788.92	-2.0052	9.0277e-05	0.0018669	NM_001379355.1	68428	Abcc4	transcript	5.88743	0.378303	3.96002	0.00176546	0.0355779
mmu-miR-199a-5p	719.344	3788.92	-2.0052	9.0277e-05	0.0018669	NM_001205076.1	59091	Abcc4	transcript	0.74834	2.54809	-1.76765	0.000966321	0.0262258
mmu-miR-199a-5p	719.344	3788.92	-2.0052	9.0277e-05	0.0018669	XM_011238527.4	269198	Abcc4	transcript	0.130446	1.37408	-3.39694	0.00227693	0.041197
mmu-miR-199a-5p	719.344	3788.92	-2.0052	9.0277e-05	0.0018669	NM_025575.3	66460	Abcc8	transcript	10.3227	6.93644	0.573558	0.00161444	0.0338841
mmu-miR-199a-5p	719.344	3788.92	-2.0052	9.0277e-05	0.0018669	NM_001013024.2	72607	Abcc8	transcript	60.8719	43.9871	0.468694	0.00218064	0.0401731
mmu-miR-199a-5p	719.344	3788.92	-2.0052	9.0277e-05	0.0018669	NM_001163170.1	280411	Abcd1	transcript	9.71146	14.5859	-0.586815	0.000860279	0.0246712
mmu-miR-199a-5p	719.344	3788.92	-2.0052	9.0277e-05	0.0018669	TCONS_00007881	56430	Abcd1	transcript	0.532009	2.12216	-1.99601	0.00045144	0.0172853
mmu-miR-199a-5p	719.344	3788.92	-2.0052	9.0277e-05	0.0018669	NM_008027.2	14251	Abcd1	transcript	51.7497	69.1708	-0.41861	0.000609558	0.0199437
mmu-miR-199a-5p	719.344	3788.92	-2.0052	9.0277e-05	0.0018669	NM_001370902.1	665700	Abcd1	transcript	7.60778	1.38907	2.45336	3.91995e-05	0.0115968
mmu-miR-199a-5p	719.344	3788.92	-2.0052	9.0277e-05	0.0018669	NM_011838.4	23936	Abcd1	transcript	70.7077	25.7672	1.45633	0.000325774	0.0144091
mmu-miR-199a-5p	719.344	3788.92	-2.0052	9.0277e-05	0.0018669	XM_011245449.1	140570	Abcd1	transcript	0.000823	4.30942	-12.3543	0.00025308	0.0125803
mmu-miR-199a-5p	719.344	3788.92	-2.0052	9.0277e-05	0.0018669	TCONS_00021414	56637	Abcd3	transcript	0	3.22604	#NAME?	0.000208101	0.011849
mmu-miR-199a-5p	719.344	3788.92	-2.0052	9.0277e-05	0.0018669	XM_030245515.2	12808	Abcd3	transcript	0	1.22489	#NAME?	0.000151503	0.011849
mmu-miR-199a-5p	719.344	3788.92	-2.0052	9.0277e-05	0.0018669	NM_001013786.3	432731	Abcd3	transcript	0	1.47175	#NAME?	0.000843935	0.0243504
mmu-miR-199a-5p	719.344	3788.92	-2.0052	9.0277e-05	0.0018669	NM_178357.3	194655	Abcd3	transcript	3.65517	5.69257	-0.639141	0.00181779	0.0363209
mmu-miR-199a-5p	719.344	3788.92	-2.0052	9.0277e-05	0.0018669	NM_025828.3	66890	Abcd3	transcript	23.7589	13.183	0.849788	0.00222884	0.0407016
mmu-miR-199a-5p	719.344	3788.92	-2.0052	9.0277e-05	0.0018669	TCONS_00000513	21952	Abcd3	transcript	0	2.94671	#NAME?	0.00241972	0.042621
mmu-miR-199a-5p	719.344	3788.92	-2.0052	9.0277e-05	0.0018669	NM_011708.4	22371	Abcd3	transcript	10.2307	5.48002	0.90065	0.00300745	0.0479264
mmu-miR-199a-5p	719.344	3788.92	-2.0052	9.0277e-05	0.0018669	NM_175036.4	230514	Abcd3	transcript	9.35461	10.555	-0.174176	0.000232174	0.0120484
mmu-miR-199a-5p	719.344	3788.92	-2.0052	9.0277e-05	0.0018669	NM_021883.2	21916	Abcd3	transcript	72.5358	52.8586	0.456554	0.00123382	0.0296362
mmu-miR-199a-5p	719.344	3788.92	-2.0052	9.0277e-05	0.0018669	NM_153542.1	216011	Abcd3	transcript	13.872	5.18166	1.42069	0.000640899	0.0205534
mmu-miR-199a-5p	719.344	3788.92	-2.0052	9.0277e-05	0.0018669	NM_019769.3	56398	Abhd5	transcript	41.3744	20.4459	1.01692	0.00319035	0.0495412
mmu-miR-199a-5p	719.344	3788.92	-2.0052	9.0277e-05	0.0018669	XM_036154756.1	20623	Abhd5	transcript	0	1.30688	#NAME?	0.000208101	0.011849
mmu-miR-199a-5p	719.344	3788.92	-2.0052	9.0277e-05	0.0018669	NM_010658.3	16658	Abhd5	transcript	5.33625	2.39311	1.15694	0.000191259	0.011849
mmu-miR-199a-5p	719.344	3788.92	-2.0052	9.0277e-05	0.0018669	TCONS_00001759	140858	Abhd5	transcript	0	1.07967	#NAME?	0.000208101	0.011849
mmu-miR-199a-5p	719.344	3788.92	-2.0052	9.0277e-05	0.0018669	TCONS_00009768	78286	Abhd5	transcript	5.80375	0.092506	5.9713	0.000875541	0.0248661
mmu-miR-199a-5p	719.344	3788.92	-2.0052	9.0277e-05	0.0018669	NM_008850.2	18738	Abhd5	transcript	12.0584	1.04784	3.52454	0.00240233	0.0424412
mmu-miR-199a-5p	719.344	3788.92	-2.0052	9.0277e-05	0.0018669	NM_001253831.1	235574	Abhd5	transcript	3.79038	10.4862	-1.46807	6.86311e-05	0.011849
mmu-miR-199a-5p	719.344	3788.92	-2.0052	9.0277e-05	0.0018669	NM_177694.6	233246	Abhd5	transcript	3.85376	0.082852	5.53959	0.000507885	0.0186404
mmu-miR-199a-5p	719.344	3788.92	-2.0052	9.0277e-05	0.0018669	TCONS_00016863	76626	Abhd5	transcript	0	1.46752	#NAME?	0.000208101	0.011849
mmu-miR-199a-5p	719.344	3788.92	-2.0052	9.0277e-05	0.0018669	XM_006518778.1	211922	Acacb	transcript	0.021746	0.97065	-5.48013	0.00024897	0.0125076
mmu-miR-199a-5p	719.344	3788.92	-2.0052	9.0277e-05	0.0018669	NM_175515.5	380614	Acacb	transcript	11.9469	1.45884	3.03374	0.000100087	0.011849
mmu-miR-199a-5p	719.344	3788.92	-2.0052	9.0277e-05	0.0018669	NM_001109910.1	83701	Acacb	transcript	2.51714	0.241925	3.37916	5.09413e-05	0.011849
mmu-miR-199a-5p	719.344	3788.92	-2.0052	9.0277e-05	0.0018669	NM_138585.3	27967	Acacb	transcript	4.17872	3.27645	0.35093	0.00119885	0.0291322
mmu-miR-199a-5p	719.344	3788.92	-2.0052	9.0277e-05	0.0018669	XM_030243604.2	319518	Acacb	transcript	3.12627	0.243176	3.68437	0.00252469	0.0436186
mmu-miR-199a-5p	719.344	3788.92	-2.0052	9.0277e-05	0.0018669	NM_010497.3	15926	Aco1	transcript	24.5205	9.93593	1.30326	0.00260813	0.0441014
mmu-miR-199a-5p	719.344	3788.92	-2.0052	9.0277e-05	0.0018669	NM_026605.2	68188	Aco1	transcript	0.084507	14.8845	-7.46053	5.32149e-05	0.011849
mmu-miR-199a-5p	719.344	3788.92	-2.0052	9.0277e-05	0.0018669	NM_001360151.1	93692	Aco2	transcript	3.38262	0.127893	4.72513	0.000270364	0.0130281
mmu-miR-199a-5p	719.344	3788.92	-2.0052	9.0277e-05	0.0018669	TCONS_00001279	226432	Acox1	transcript	5.41465	0.03601	7.23233	0.00192567	0.0375518
mmu-miR-199a-5p	719.344	3788.92	-2.0052	9.0277e-05	0.0018669	NM_145991.2	214498	Acox1	transcript	0.353721	3.55633	-3.32971	0.000125934	0.011849
mmu-miR-199a-5p	719.344	3788.92	-2.0052	9.0277e-05	0.0018669	NM_026742.4	68493	Acox1	transcript	19.9983	10.1295	0.981313	0.00129411	0.0301541
mmu-miR-199a-5p	719.344	3788.92	-2.0052	9.0277e-05	0.0018669	NM_178045.4	213391	Acox1	transcript	2.94432	0.459439	2.67999	0.00253891	0.0436594
mmu-miR-199a-5p	719.344	3788.92	-2.0052	9.0277e-05	0.0018669	NM_019651.2	56294	Acox1	transcript	5.47393	4.63783	0.239129	0.00119187	0.0291125
mmu-miR-199a-5p	719.344	3788.92	-2.0052	9.0277e-05	0.0018669	XM_036165926.1	18575	Acox1	transcript	0.00292067	2.25441	-9.59223	0.000224915	0.0120256
mmu-miR-199a-5p	719.344	3788.92	-2.0052	9.0277e-05	0.0018669	NM_011130.2	18970	Acox1	transcript	0.106074	7.27437	-6.09968	0.000143192	0.011849
mmu-miR-199a-5p	719.344	3788.92	-2.0052	9.0277e-05	0.0018669	TCONS_00015185	14533	Acox1	transcript	0	4.31854	#NAME?	0.000208101	0.011849
mmu-miR-199a-5p	719.344	3788.92	-2.0052	9.0277e-05	0.0018669	XM_017320585.3	100972	Acsl6	transcript	15.6801	9.57027	0.712305	0.00143583	0.0322223
mmu-miR-199a-5p	719.344	3788.92	-2.0052	9.0277e-05	0.0018669	XM_006516544.4	140580	Acsl6	transcript	0	0.964251	#NAME?	0.000208101	0.011849
mmu-miR-199a-5p	719.344	3788.92	-2.0052	9.0277e-05	0.0018669	NM_011851.4	23959	Acsl6	transcript	5.20463	1.58298	1.71715	0.00210315	0.0393487
mmu-miR-199a-5p	719.344	3788.92	-2.0052	9.0277e-05	0.0018669	NM_001374651.1	13400	Acsl6	transcript	36.6963	22.8391	0.684126	0.000407792	0.0164937
mmu-miR-199a-5p	719.344	3788.92	-2.0052	9.0277e-05	0.0018669	NM_019580.4	56209	Acsl6	transcript	18.6553	9.93409	0.90913	0.00318159	0.0495001
mmu-miR-199a-5p	719.344	3788.92	-2.0052	9.0277e-05	0.0018669	NM_198006.4	76178	Acsl6	transcript	50.2161	22.0338	1.18843	0.00112898	0.0281926
mmu-miR-199a-5p	719.344	3788.92	-2.0052	9.0277e-05	0.0018669	TCONS_00023188	20541	Acsl6	transcript	20.6975	50.4304	-1.28484	0.00253048	0.0436594
mmu-miR-199a-5p	719.344	3788.92	-2.0052	9.0277e-05	0.0018669	NM_144788.2	207304	Acsl6	transcript	26.5664	25.5014	0.0590293	0.00127773	0.0300691
mmu-miR-199a-5p	719.344	3788.92	-2.0052	9.0277e-05	0.0018669	NM_019581.3	56055	Acsl6	transcript	0.704575	3.06818	-2.12256	0.000137375	0.011849
mmu-miR-199a-5p	719.344	3788.92	-2.0052	9.0277e-05	0.0018669	XM_036158144.1	68675	Acsl6	transcript	0	2.19166	#NAME?	0.000259638	0.0127318
mmu-miR-199a-5p	719.344	3788.92	-2.0052	9.0277e-05	0.0018669	NM_001252313.1	20185	Acsl6	transcript	6.31771	4.66975	0.436054	0.00207931	0.0392245
mmu-miR-199a-5p	719.344	3788.92	-2.0052	9.0277e-05	0.0018669	NM_175022.3	233210	Acsl6	transcript	3.51823	6.79684	-0.950013	0.000676499	0.0211566
mmu-miR-199a-5p	719.344	3788.92	-2.0052	9.0277e-05	0.0018669	NM_011500.3	268980	Acsl6	transcript	9.79792	10.3345	-0.0769267	0.00263953	0.0444112
mmu-miR-199a-5p	719.344	3788.92	-2.0052	9.0277e-05	0.0018669	NM_001012477.2	20315	Acsl6	transcript	41.9226	8.72303	2.26483	0.00250906	0.0434547
mmu-miR-199a-5p	719.344	3788.92	-2.0052	9.0277e-05	0.0018669	NM_153484.3	21685	Acsl6	transcript	18.8436	3.54891	2.40862	0.00060823	0.0199437
mmu-miR-199a-5p	719.344	3788.92	-2.0052	9.0277e-05	0.0018669	TCONS_00021604	66626	Acsl6	transcript	0.013365	0.954189	-6.15774	0.000279953	0.0131685
mmu-miR-199a-5p	719.344	3788.92	-2.0052	9.0277e-05	0.0018669	NM_001142957.1	100043468	Acsl6	transcript	6.14218	3.75226	0.71099	0.00229483	0.0413623
mmu-miR-199a-5p	719.344	3788.92	-2.0052	9.0277e-05	0.0018669	NM_001039512.1	117198	Acsl6	transcript	0	5.9554	#NAME?	0.000208101	0.011849
mmu-miR-199a-5p	719.344	3788.92	-2.0052	9.0277e-05	0.0018669	TCONS_00019782	50527	Acsl6	transcript	0	1.12978	#NAME?	0.000208101	0.011849
mmu-miR-199a-5p	719.344	3788.92	-2.0052	9.0277e-05	0.0018669	XM_006522740.5	78408	Actr3b	transcript	0.427643	2.84562	-2.73427	0.000198822	0.011849
mmu-miR-199a-5p	719.344	3788.92	-2.0052	9.0277e-05	0.0018669	NM_133904.2	100705	Actr3b	transcript	78.4669	42.3344	0.890253	0.00154753	0.0333696
mmu-miR-199a-5p	719.344	3788.92	-2.0052	9.0277e-05	0.0018669	NM_172513.3	213056	Actr3b	transcript	2.78856	1.04984	1.40935	0.00125155	0.0297996
mmu-miR-199a-5p	719.344	3788.92	-2.0052	9.0277e-05	0.0018669	XM_006518767.2	210789	Actr3b	transcript	12.8952	8.19921	0.65328	0.000836928	0.0241975
mmu-miR-199a-5p	719.344	3788.92	-2.0052	9.0277e-05	0.0018669	NM_023668.3	83431	Adamts5	transcript	9.7942	3.82846	1.35516	0.00122006	0.0294455
mmu-miR-199a-5p	719.344	3788.92	-2.0052	9.0277e-05	0.0018669	TCONS_00005890	269529	Adamts5	transcript	0.007847	1.65025	-7.71633	0.000222374	0.0120256
mmu-miR-199a-5p	719.344	3788.92	-2.0052	9.0277e-05	0.0018669	NM_181274.4	66869	Adamts5	transcript	0.87176	2.05209	-1.23509	0.00243894	0.0426927
mmu-miR-199a-5p	719.344	3788.92	-2.0052	9.0277e-05	0.0018669	NM_026732.3	68463	Adamts5	transcript	43.6589	3.3e-05	20.3354	1.80419e-05	0.00898899
mmu-miR-199a-5p	719.344	3788.92	-2.0052	9.0277e-05	0.0018669	NM_013657.5	20348	Adamts5	transcript	7.1266	2.30536	1.62822	0.00158434	0.0336513
mmu-miR-199a-5p	719.344	3788.92	-2.0052	9.0277e-05	0.0018669	NM_001113563.2	20851	Adamts5	transcript	16.5189	9.88304	0.741088	0.00313081	0.049005
mmu-miR-199a-5p	719.344	3788.92	-2.0052	9.0277e-05	0.0018669	TCONS_00000331	347722	Adamts5	transcript	0.0155523	1.00315	-6.01126	0.000242995	0.0123388
mmu-miR-199a-5p	719.344	3788.92	-2.0052	9.0277e-05	0.0018669	NM_009062.3	19736	Adamts5	transcript	6.1042	1.8883	1.69271	0.0018282	0.0363766
mmu-miR-199a-5p	719.344	3788.92	-2.0052	9.0277e-05	0.0018669	NM_145460.2	218885	Adamts5	transcript	26.5147	15.1023	0.812022	0.00140182	0.0317246
mmu-miR-199a-5p	719.344	3788.92	-2.0052	9.0277e-05	0.0018669	XM_036155747.1	216190	Adamts5	transcript	0	2.58266	#NAME?	0.00257583	0.0439661
mmu-miR-199a-5p	719.344	3788.92	-2.0052	9.0277e-05	0.0018669	NM_023627.1	71780	Adamts5	transcript	4.28599	8.28742	-0.951296	0.000577775	0.0198239
mmu-miR-199a-5p	719.344	3788.92	-2.0052	9.0277e-05	0.0018669	TCONS_00014197	11735	Adamts5	transcript	4.56823	0.932611	2.29229	0.00112965	0.0281926
mmu-miR-125b-5p	6872.75	16341.9	-1.1593	0.0012601	0.014477	NM_011396.3	20520	Adamts5	transcript	11.2491	3.65855	1.62047	0.000581808	0.0198239
mmu-miR-125b-5p	6872.75	16341.9	-1.1593	0.0012601	0.014477	NM_009066.3	19763	Adamts5	transcript	2.81954	5.14092	-0.866567	0.00124268	0.0297147
mmu-miR-125b-5p	6872.75	16341.9	-1.1593	0.0012601	0.014477	NM_172694.2	230316	Adamts5	transcript	8.61234	3.69976	1.21897	0.00144528	0.0322955
mmu-miR-125b-5p	6872.75	16341.9	-1.1593	0.0012601	0.014477	XM_036156352.1	16562	Adamts5	transcript	0.49659	3.61725	-2.86477	0.0016394	0.0341585
mmu-miR-125b-5p	6872.75	16341.9	-1.1593	0.0012601	0.014477	NM_001370902.1	665700	Adamts5	transcript	7.60778	1.38907	2.45336	3.91995e-05	0.0115968
mmu-miR-125b-5p	6872.75	16341.9	-1.1593	0.0012601	0.014477	NM_011838.4	23936	Adamts5	transcript	70.7077	25.7672	1.45633	0.000325774	0.0144091
mmu-miR-125b-5p	6872.75	16341.9	-1.1593	0.0012601	0.014477	NM_026443.4	67900	Adamts5	transcript	44.413	27.5971	0.686465	0.000274683	0.0131025
mmu-miR-125b-5p	6872.75	16341.9	-1.1593	0.0012601	0.014477	NM_028903.2	71145	Adck1	transcript	9.59063	4.30715	1.15489	0.000145689	0.011849
mmu-miR-125b-5p	6872.75	16341.9	-1.1593	0.0012601	0.014477	NM_018779.2	54611	Adck1	transcript	9.7464	25.8013	-1.4045	0.000703119	0.0216341
mmu-miR-125b-5p	6872.75	16341.9	-1.1593	0.0012601	0.014477	XM_030245515.2	12808	Adck1	transcript	0	1.22489	#NAME?	0.000151503	0.011849
mmu-miR-125b-5p	6872.75	16341.9	-1.1593	0.0012601	0.014477	TCONS_00020139	16880	Adck1	transcript	0	1.30271	#NAME?	0.000208101	0.011849
mmu-miR-125b-5p	6872.75	16341.9	-1.1593	0.0012601	0.014477	TCONS_00012867	214897	Adck1	transcript	0	0.820922	#NAME?	0.000208101	0.011849
mmu-miR-125b-5p	6872.75	16341.9	-1.1593	0.0012601	0.014477	NM_001013786.3	432731	Adcy5	transcript	0	1.47175	#NAME?	0.000843935	0.0243504
mmu-miR-125b-5p	6872.75	16341.9	-1.1593	0.0012601	0.014477	NM_153542.1	216011	Adcy5	transcript	13.872	5.18166	1.42069	0.000640899	0.0205534
mmu-miR-125b-5p	6872.75	16341.9	-1.1593	0.0012601	0.014477	TCONS_00018645	238505	Adcy5	transcript	31.0669	4.54431	2.77324	0.000120377	0.011849
mmu-miR-125b-5p	6872.75	16341.9	-1.1593	0.0012601	0.014477	NM_172946.3	268481	Adcy5	transcript	5.28563	3.34288	0.660981	0.000800251	0.0235141
mmu-miR-125b-5p	6872.75	16341.9	-1.1593	0.0012601	0.014477	NM_001190985.1	14768	Adcy5	transcript	4.04587	1.43319	1.49722	0.00208825	0.0392885
mmu-miR-125b-5p	6872.75	16341.9	-1.1593	0.0012601	0.014477	XM_036162964.1	19769	Adcy5	transcript	3.58276	1.23243	1.53957	0.00189902	0.0372109
mmu-miR-125b-5p	6872.75	16341.9	-1.1593	0.0012601	0.014477	NM_010658.3	16658	Adcy5	transcript	5.33625	2.39311	1.15694	0.000191259	0.011849
mmu-miR-125b-5p	6872.75	16341.9	-1.1593	0.0012601	0.014477	TCONS_00001759	140858	Adcy5	transcript	0	1.07967	#NAME?	0.000208101	0.011849
mmu-miR-125b-5p	6872.75	16341.9	-1.1593	0.0012601	0.014477	TCONS_00009768	78286	Adcy5	transcript	5.80375	0.092506	5.9713	0.000875541	0.0248661
mmu-miR-125b-5p	6872.75	16341.9	-1.1593	0.0012601	0.014477	NM_001362370.1	81601	Adcy5	transcript	0.382161	1.14742	-1.58615	0.000604559	0.0199437
mmu-miR-125b-5p	6872.75	16341.9	-1.1593	0.0012601	0.014477	NM_026095.4	67332	Adcy5	transcript	19.2542	19.8437	-0.0435094	0.000206079	0.011849
mmu-miR-125b-5p	6872.75	16341.9	-1.1593	0.0012601	0.014477	NM_177694.6	233246	Adcy6	transcript	3.85376	0.082852	5.53959	0.000507885	0.0186404
mmu-miR-125b-5p	6872.75	16341.9	-1.1593	0.0012601	0.014477	NM_008850.2	18738	Adcy6	transcript	12.0584	1.04784	3.52454	0.00240233	0.0424412
mmu-miR-125b-5p	6872.75	16341.9	-1.1593	0.0012601	0.014477	NM_025454.2	66262	Adcy6	transcript	2.38478	4.37866	-0.876636	0.000978861	0.0262643
mmu-miR-125b-5p	6872.75	16341.9	-1.1593	0.0012601	0.014477	XM_006518778.1	211922	Adcy6	transcript	0.021746	0.97065	-5.48013	0.00024897	0.0125076
mmu-miR-125b-5p	6872.75	16341.9	-1.1593	0.0012601	0.014477	TCONS_00015770	327978	Adcy6	transcript	3.62261	0.745147	2.28143	0.00305254	0.0483264
mmu-miR-125b-5p	6872.75	16341.9	-1.1593	0.0012601	0.014477	NM_008707.4	18107	Adcy6	transcript	14.258	9.43261	0.596042	0.00291161	0.0472967
mmu-miR-125b-5p	6872.75	16341.9	-1.1593	0.0012601	0.014477	NM_008663.2	17921	Adcy6	transcript	2.93167	0.100171	4.87119	0.00182502	0.0363643
mmu-miR-125b-5p	6872.75	16341.9	-1.1593	0.0012601	0.014477	NM_026605.2	68188	Adcy6	transcript	0.084507	14.8845	-7.46053	5.32149e-05	0.011849
mmu-miR-125b-5p	6872.75	16341.9	-1.1593	0.0012601	0.014477	XM_036165449.1	68095	Adcy6	transcript	10.45	0.0468257	7.80199	2.65957e-05	0.0104662
mmu-miR-125b-5p	6872.75	16341.9	-1.1593	0.0012601	0.014477	NM_009088.3	20019	Adcy6	transcript	11.1603	5.17423	1.10897	4.63453e-05	0.011849
mmu-miR-125b-5p	6872.75	16341.9	-1.1593	0.0012601	0.014477	TCONS_00001279	226432	Adcy6	transcript	5.41465	0.03601	7.23233	0.00192567	0.0375518
mmu-miR-125b-5p	6872.75	16341.9	-1.1593	0.0012601	0.014477	NM_009382.3	21838	Adcy6	transcript	4.00042	1.18713	1.75268	0.00193232	0.0375518
mmu-miR-125b-5p	6872.75	16341.9	-1.1593	0.0012601	0.014477	XM_030251892.1	56190	Adcy6	transcript	0.00704133	2.15953	-8.26065	0.00022392	0.0120256
mmu-miR-125b-5p	6872.75	16341.9	-1.1593	0.0012601	0.014477	NM_011130.2	18970	Adcy6	transcript	0.106074	7.27437	-6.09968	0.000143192	0.011849
mmu-miR-125b-5p	6872.75	16341.9	-1.1593	0.0012601	0.014477	TCONS_00020940	57259	Adcy6	transcript	0	4.26412	#NAME?	0.000208101	0.011849
mmu-miR-125b-5p	6872.75	16341.9	-1.1593	0.0012601	0.014477	NM_026490.2	56284	Adcy6	transcript	5.12255	3.13969	0.70624	0.00202573	0.0385216
mmu-miR-125b-5p	6872.75	16341.9	-1.1593	0.0012601	0.014477	NM_026192.3	67488	Adcy6	transcript	24.0407	36.1119	-0.586996	0.00100726	0.0267227
mmu-miR-125b-5p	6872.75	16341.9	-1.1593	0.0012601	0.014477	NM_001017968.2	503610	Adcy6	transcript	7.04896	0	Inf	5.36214e-05	0.011849
mmu-miR-125b-5p	6872.75	16341.9	-1.1593	0.0012601	0.014477	NM_144913.3	231803	Adsl	transcript	5.78178	5.51105	0.0691862	0.000438887	0.0170029
mmu-miR-125b-5p	6872.75	16341.9	-1.1593	0.0012601	0.014477	TCONS_00023188	20541	Adsl	transcript	20.6975	50.4304	-1.28484	0.00253048	0.0436594
mmu-miR-125b-5p	6872.75	16341.9	-1.1593	0.0012601	0.014477	TCONS_00011907	71941	Adsl	transcript	0.00341133	1.54782	-8.82569	0.000463751	0.017514
mmu-miR-125b-5p	6872.75	16341.9	-1.1593	0.0012601	0.014477	NM_019581.3	56055	Adsl	transcript	0.704575	3.06818	-2.12256	0.000137375	0.011849
mmu-miR-125b-5p	6872.75	16341.9	-1.1593	0.0012601	0.014477	XM_030250546.2	56386	Adsl	transcript	0.00943533	1.70533	-7.49777	0.000179154	0.011849
mmu-miR-125b-5p	6872.75	16341.9	-1.1593	0.0012601	0.014477	NM_199029.2	380912	Adsl	transcript	0.873976	4.10068	-2.2302	8.95514e-05	0.011849
mmu-miR-125b-5p	6872.75	16341.9	-1.1593	0.0012601	0.014477	NM_011500.3	268980	Adsl	transcript	9.79792	10.3345	-0.0769267	0.00263953	0.0444112
mmu-miR-125b-5p	6872.75	16341.9	-1.1593	0.0012601	0.014477	NM_001012477.2	20315	Adsl	transcript	41.9226	8.72303	2.26483	0.00250906	0.0434547
mmu-miR-125b-5p	6872.75	16341.9	-1.1593	0.0012601	0.014477	NM_153484.3	21685	Adsl	transcript	18.8436	3.54891	2.40862	0.00060823	0.0199437
mmu-miR-125b-5p	6872.75	16341.9	-1.1593	0.0012601	0.014477	NM_001167860.2	330319	Adsl	transcript	5.83695	2.65031	1.13905	0.000584908	0.0198239
mmu-miR-125b-5p	6872.75	16341.9	-1.1593	0.0012601	0.014477	NM_153136.5	213484	Adsl	transcript	4.78104	1.31867	1.85824	0.00059672	0.0199437
mmu-miR-125b-5p	6872.75	16341.9	-1.1593	0.0012601	0.014477	XM_006518767.2	210789	Adsl	transcript	12.8952	8.19921	0.65328	0.000836928	0.0241975
mmu-miR-125b-5p	6872.75	16341.9	-1.1593	0.0012601	0.014477	NM_001372425.1	234593	Adsl	transcript	0	1.53412	#NAME?	8.94309e-05	0.011849
mmu-miR-125b-5p	6872.75	16341.9	-1.1593	0.0012601	0.014477	XM_030248280.2	11512	Agap1	transcript	0.0235687	1.77038	-6.23104	0.000785551	0.0231852
mmu-miR-125b-5p	6872.75	16341.9	-1.1593	0.0012601	0.014477	NM_001361966.1	73998	Agap1	transcript	3.55004	1.71795	1.04715	0.00105024	0.027401
mmu-miR-125b-5p	6872.75	16341.9	-1.1593	0.0012601	0.014477	TCONS_00005890	269529	Agap1	transcript	0.007847	1.65025	-7.71633	0.000222374	0.0120256
mmu-miR-125b-5p	6872.75	16341.9	-1.1593	0.0012601	0.014477	NM_013759.3	27361	Agap1	transcript	51.3553	24.2138	1.08468	0.00124589	0.0297147
mmu-miR-125b-5p	6872.75	16341.9	-1.1593	0.0012601	0.014477	NM_198092.2	53376	Agap1	transcript	0	3.70415	#NAME?	8.65854e-06	0.00809735
mmu-miR-125b-5p	6872.75	16341.9	-1.1593	0.0012601	0.014477	NM_010324.2	14718	Agap1	transcript	326.78	192.111	0.766377	0.000672183	0.0210682
mmu-miR-125b-5p	6872.75	16341.9	-1.1593	0.0012601	0.014477	NM_001113563.2	20851	Agap1	transcript	16.5189	9.88304	0.741088	0.00313081	0.049005
mmu-miR-125b-5p	6872.75	16341.9	-1.1593	0.0012601	0.014477	TCONS_00000331	347722	Agap1	transcript	0.0155523	1.00315	-6.01126	0.000242995	0.0123388
mmu-miR-125b-5p	6872.75	16341.9	-1.1593	0.0012601	0.014477	NM_009062.3	19736	Agap1	transcript	6.1042	1.8883	1.69271	0.0018282	0.0363766
mmu-miR-125b-5p	6872.75	16341.9	-1.1593	0.0012601	0.014477	NM_023627.1	71780	Agap1	transcript	4.28599	8.28742	-0.951296	0.000577775	0.0198239
mmu-miR-125b-5p	6872.75	16341.9	-1.1593	0.0012601	0.014477	NM_198607.1	223626	Agap1	transcript	7.92607	2.09171	1.92192	0.00193056	0.0375518
mmu-miR-125b-5p	6872.75	16341.9	-1.1593	0.0012601	0.014477	XM_030250848.1	228998	Agap1	transcript	0	1.08784	#NAME?	0.000208101	0.011849
mmu-miR-125b-5p	6872.75	16341.9	-1.1593	0.0012601	0.014477	TCONS_00014197	11735	Agap1	transcript	4.56823	0.932611	2.29229	0.00112965	0.0281926
mmu-miR-125b-5p	6872.75	16341.9	-1.1593	0.0012601	0.014477	NM_001008791.2	73750	Agap1	transcript	6.35529	1.17491	2.43541	0.000189827	0.011849
mmu-miR-125b-5p	6872.75	16341.9	-1.1593	0.0012601	0.014477	XM_006539145.5	68703	Agap1	transcript	0.184451	1.30383	-2.82145	0.000308043	0.0139803
mmu-miR-125b-5p	6872.75	16341.9	-1.1593	0.0012601	0.014477	NM_020496.3	57246	Agap1	transcript	0.561424	1.58799	-1.50004	0.000600662	0.0199437
mmu-miR-125b-5p	6872.75	16341.9	-1.1593	0.0012601	0.014477	TCONS_00022825	74762	Agap1	transcript	2.27339	0	Inf	0.000284564	0.0132564
mmu-miR-125b-5p	6872.75	16341.9	-1.1593	0.0012601	0.014477	XM_006532843.2	216739	Agap1	transcript	4.0953	0.00190133	11.0727	0.000944224	0.0260079
mmu-miR-125b-5p	6872.75	16341.9	-1.1593	0.0012601	0.014477	NM_172588.2	218442	Agap1	transcript	4.73797	4.64443	0.028766	0.00297412	0.047773
mmu-miR-125b-5p	6872.75	16341.9	-1.1593	0.0012601	0.014477	NM_011207.2	545622	Agap1	transcript	0.0298263	2.85143	-6.57895	5.67792e-05	0.011849
mmu-miR-125b-5p	6872.75	16341.9	-1.1593	0.0012601	0.014477	NM_009238.3	20677	Agap1	transcript	5.1395	21.1398	-2.04026	0.00111919	0.0281926
mmu-miR-125b-5p	6872.75	16341.9	-1.1593	0.0012601	0.014477	NM_019694.2	56384	Agap1	transcript	25.4967	5.73717	2.1519	0.000146779	0.011849
mmu-miR-125b-5p	6872.75	16341.9	-1.1593	0.0012601	0.014477	TCONS_00001243	70579	Agap1	transcript	0	3.03869	#NAME?	0.000208101	0.011849
mmu-miR-125b-5p	6872.75	16341.9	-1.1593	0.0012601	0.014477	NM_078477.2	118445	Agap1	transcript	1.14929	2.82258	-1.29627	0.0032587	0.0499953
mmu-miR-125b-5p	6872.75	16341.9	-1.1593	0.0012601	0.014477	NM_173866.4	108682	Agap1	transcript	15.5947	1.46859	3.40854	0.000996956	0.0266488
mmu-miR-125b-5p	6872.75	16341.9	-1.1593	0.0012601	0.014477	NM_175398.4	109050	Agap1	transcript	13.7843	2.56575	2.42558	0.000824044	0.0239717
mmu-miR-125b-5p	6872.75	16341.9	-1.1593	0.0012601	0.014477	TCONS_00012709	80288	Agap1	transcript	0.156424	1.94385	-3.63538	0.000218389	0.0119919
mmu-miR-125b-5p	6872.75	16341.9	-1.1593	0.0012601	0.014477	NM_008467.4	16649	Agpat2	transcript	40.2608	22.3532	0.848894	0.00138369	0.0314147
mmu-miR-125b-5p	6872.75	16341.9	-1.1593	0.0012601	0.014477	XM_006527268.4	66980	Agpat5	transcript	7.12351	2.22921	1.67606	0.000398742	0.0162795
mmu-miR-125b-5p	6872.75	16341.9	-1.1593	0.0012601	0.014477	NM_001324531.1	19340	Agpat5	transcript	4.60047	5.82791	-0.341197	0.00247029	0.0430463
mmu-miR-125b-5p	6872.75	16341.9	-1.1593	0.0012601	0.014477	NM_001081236.1	76792	Agpat5	transcript	8.82049	3.09024	1.51314	0.00010701	0.011849
mmu-miR-125b-5p	6872.75	16341.9	-1.1593	0.0012601	0.014477	NM_001012765.5	224129	Agpat5	transcript	12.5366	21.2562	-0.761738	0.000530918	0.0190902
mmu-miR-125b-5p	6872.75	16341.9	-1.1593	0.0012601	0.014477	NM_011322.3	20266	Agpat5	transcript	9.35384	3.7507	1.3184	0.00106089	0.0274983
mmu-miR-125b-5p	6872.75	16341.9	-1.1593	0.0012601	0.014477	XM_006507189.4	109264	Agpat5	transcript	12.3611	5.99776	1.04331	1.94183e-05	0.00898899
mmu-miR-125b-5p	6872.75	16341.9	-1.1593	0.0012601	0.014477	NM_177673.2	230967	Agpat5	transcript	0.940088	3.10235	-1.72249	8.11368e-05	0.011849
mmu-miR-125b-5p	6872.75	16341.9	-1.1593	0.0012601	0.014477	NM_007652.5	12509	Agpat5	transcript	25.2353	13.9298	0.857265	0.00138367	0.0314147
mmu-miR-125b-5p	6872.75	16341.9	-1.1593	0.0012601	0.014477	NM_026792.3	52123	Agpat5	transcript	6.0244	3.29056	0.872483	0.0020744	0.039184
mmu-miR-125b-5p	6872.75	16341.9	-1.1593	0.0012601	0.014477	XM_030252339.2	102634333	Agpat5	transcript	0	17.8796	#NAME?	2.71143e-06	0.00681592
mmu-miR-125b-5p	6872.75	16341.9	-1.1593	0.0012601	0.014477	XM_006539897.3	233103	Agpat5	transcript	0.00112633	0.853869	-9.56624	0.000196093	0.011849
mmu-miR-125b-5p	6872.75	16341.9	-1.1593	0.0012601	0.014477	NM_028758.2	74105	Agpat5	transcript	8.41225	10.3445	-0.298296	0.000569408	0.0197716
mmu-miR-125b-5p	6872.75	16341.9	-1.1593	0.0012601	0.014477	XM_006520375.5	12419	Agpat5	transcript	0	7.40918	#NAME?	0.000215289	0.0119608
mmu-miR-125b-5p	6872.75	16341.9	-1.1593	0.0012601	0.014477	NM_001013390.3	399548	Agpat5	transcript	45.134	2.15251	4.39012	0.000262235	0.0127318
mmu-miR-125b-5p	6872.75	16341.9	-1.1593	0.0012601	0.014477	NM_001358780.1	17181	Agpat5	transcript	4.14943	3.85625	0.105713	0.00311384	0.0489067
mmu-miR-125b-5p	6872.75	16341.9	-1.1593	0.0012601	0.014477	XM_036158779.1	64652	Agpat5	transcript	0.085711	1.0889	-3.66725	3.06078e-05	0.0109036
mmu-miR-125b-5p	6872.75	16341.9	-1.1593	0.0012601	0.014477	NM_018738.4	16145	Agpat5	transcript	8.95302	4.35064	1.04115	0.000598084	0.0199437
mmu-miR-125b-5p	6872.75	16341.9	-1.1593	0.0012601	0.014477	NM_133218.2	170753	Agpat5	transcript	4.21261	7.10953	-0.755041	0.00042631	0.0168243
mmu-miR-125b-5p	6872.75	16341.9	-1.1593	0.0012601	0.014477	TCONS_00001032	21961	Agpat5	transcript	45.687	0.543971	6.39211	0.000464811	0.017514
mmu-miR-125b-5p	6872.75	16341.9	-1.1593	0.0012601	0.014477	NM_010217.2	14219	Agpat5	transcript	13.8161	47.3045	-1.77562	0.00230935	0.0414133
mmu-miR-125b-5p	6872.75	16341.9	-1.1593	0.0012601	0.014477	TCONS_00002662	72075	Agpat5	transcript	0	1.20872	#NAME?	0.000208101	0.011849
mmu-miR-125b-5p	6872.75	16341.9	-1.1593	0.0012601	0.014477	XM_030243724.1	80914	Agpat5	transcript	0.0461117	2.38203	-5.69092	6.62482e-05	0.011849
mmu-miR-125b-5p	6872.75	16341.9	-1.1593	0.0012601	0.014477	NM_172338.2	214063	Agt	transcript	8.89771	4.23916	1.06965	0.000105129	0.011849
mmu-miR-125b-5p	6872.75	16341.9	-1.1593	0.0012601	0.014477	NM_001252570.1	227696	Ahcyl2	transcript	22.4323	3.5729	2.65041	0.000117919	0.011849
mmu-miR-125b-5p	6872.75	16341.9	-1.1593	0.0012601	0.014477	NM_010887.2	17993	Ahcyl2	transcript	70.9658	46.5063	0.609697	0.000226377	0.0120256
mmu-miR-125b-5p	6872.75	16341.9	-1.1593	0.0012601	0.014477	TCONS_00004645	71807	Ahcyl2	transcript	2.75995	1.1594	1.25126	0.00307992	0.0485894
mmu-miR-125b-5p	6872.75	16341.9	-1.1593	0.0012601	0.014477	NM_197990.3	69399	Ahcyl2	transcript	3.74703	6.52172	-0.799504	0.00161143	0.0338712
mmu-miR-125b-5p	6872.75	16341.9	-1.1593	0.0012601	0.014477	NM_001164172.1	26400	Ahcyl2	transcript	12.2356	10.1167	0.274339	0.00107807	0.0276308
mmu-miR-125b-5p	6872.75	16341.9	-1.1593	0.0012601	0.014477	TCONS_00007852	59008	Ahcyl2	transcript	0	3.69736	#NAME?	0.000208101	0.011849
mmu-miR-125b-5p	6872.75	16341.9	-1.1593	0.0012601	0.014477	NM_021284.6	16653	Ahcyl2	transcript	12.0298	6.68577	0.847446	0.00300691	0.0479264
mmu-miR-125b-5p	6872.75	16341.9	-1.1593	0.0012601	0.014477	NM_133664.3	16763	Ahcyl2	transcript	0.048709	2.17237	-5.47894	1.71299e-06	0.00606699
mmu-miR-125b-5p	6872.75	16341.9	-1.1593	0.0012601	0.014477	NM_145541.5	109905	Ahcyl2	transcript	15.3453	0.71136	4.43107	0.00178106	0.0357724
mmu-miR-125b-5p	6872.75	16341.9	-1.1593	0.0012601	0.014477	NM_145562.2	231440	Ahcyl2	transcript	15.3222	37.5905	-1.29475	0.00249696	0.043351
mmu-miR-125b-5p	6872.75	16341.9	-1.1593	0.0012601	0.014477	NM_134084.1	105675	Ahcyl2	transcript	79.0387	48.8923	0.692952	0.000176878	0.011849
mmu-miR-125b-5p	6872.75	16341.9	-1.1593	0.0012601	0.014477	NM_001081242.2	70549	Ahcyl2	transcript	0.0245157	2.63951	-6.75042	0.000142942	0.011849
mmu-miR-125b-5p	6872.75	16341.9	-1.1593	0.0012601	0.014477	XM_030248555.2	239555	Ahcyl2	transcript	0	1.40417	#NAME?	0.000208101	0.011849
mmu-miR-125b-5p	6872.75	16341.9	-1.1593	0.0012601	0.014477	NM_001348274.1	231134	Ahcyl2	transcript	7.71527	2.12785	1.85832	0.00107387	0.0276308
mmu-miR-125b-5p	6872.75	16341.9	-1.1593	0.0012601	0.014477	XM_036155254.1	69632	Ahcyl2	transcript	4.65604	2.21758	1.07012	6.94014e-06	0.00809735
mmu-miR-125b-5p	6872.75	16341.9	-1.1593	0.0012601	0.014477	NM_011435.3	20657	Ahnak	transcript	14.5721	6.60321	1.14197	0.00303919	0.0482692
mmu-miR-125b-5p	6872.75	16341.9	-1.1593	0.0012601	0.014477	NM_001164441.1	67434	Ahnak	transcript	8.59489	4.39847	0.966478	0.00240277	0.0424412
mmu-miR-125b-5p	6872.75	16341.9	-1.1593	0.0012601	0.014477	NM_018743.4	102247	Ahnak	transcript	13.5676	7.76624	0.804877	0.000326486	0.0144091
mmu-miR-125b-5p	6872.75	16341.9	-1.1593	0.0012601	0.014477	NM_016709.2	11992	AI593442	transcript	41.6289	23.1108	0.849015	0.00102481	0.0269859
mmu-miR-125b-5p	6872.75	16341.9	-1.1593	0.0012601	0.014477	TCONS_00005936	242474	AI593442	transcript	1.57062	2.8449	-0.857041	0.000608684	0.0199437
mmu-miR-125b-5p	6872.75	16341.9	-1.1593	0.0012601	0.014477	NM_029436.3	75785	AI593442	transcript	0.247428	12.2514	-5.6298	1.70221e-05	0.00898899
mmu-miR-125b-5p	6872.75	16341.9	-1.1593	0.0012601	0.014477	XM_011239063.3	227634	AI593442	transcript	0.006683	0.967055	-7.17696	0.000213459	0.0119058
mmu-miR-125b-5p	6872.75	16341.9	-1.1593	0.0012601	0.014477	NM_145491.2	104215	AI593442	transcript	54.4506	24.8375	1.13243	0.00156999	0.0335072
mmu-miR-125b-5p	6872.75	16341.9	-1.1593	0.0012601	0.014477	XM_006507470.5	19647	AI593442	transcript	4.54464	4.46107	0.0267746	0.0020459	0.0388008
mmu-miR-125b-5p	6872.75	16341.9	-1.1593	0.0012601	0.014477	NM_177740.5	244058	AI593442	transcript	7.57193	3.28122	1.20643	0.00224012	0.0407375
mmu-miR-125b-5p	6872.75	16341.9	-1.1593	0.0012601	0.014477	NM_138651.7	110911	AI593442	transcript	29.7644	31.9439	-0.101955	0.00102009	0.0269116
mmu-miR-125b-5p	6872.75	16341.9	-1.1593	0.0012601	0.014477	NM_001358359.1	223649	AI593442	transcript	4.18914	9.13984	-1.12551	0.00260867	0.0441014
mmu-miR-145a-5p	3164.64	8286.18	-1.2633	0.0014973	0.016828	NM_007688.2	12632	AI593442	transcript	39.698	62.224	-0.648405	0.00142222	0.0320328
mmu-miR-145a-5p	3164.64	8286.18	-1.2633	0.0014973	0.016828	NM_001081242.2	70549	AI593442	transcript	0.0245157	2.63951	-6.75042	0.000142942	0.011849
mmu-miR-145a-5p	3164.64	8286.18	-1.2633	0.0014973	0.016828	XM_006522740.5	78408	AI593442	transcript	0.427643	2.84562	-2.73427	0.000198822	0.011849
mmu-miR-145a-5p	3164.64	8286.18	-1.2633	0.0014973	0.016828	NM_001039512.1	117198	AI593442	transcript	0	5.9554	#NAME?	0.000208101	0.011849
mmu-miR-145a-5p	3164.64	8286.18	-1.2633	0.0014973	0.016828	TCONS_00021604	66626	AI593442	transcript	0.013365	0.954189	-6.15774	0.000279953	0.0131685
mmu-miR-145a-5p	3164.64	8286.18	-1.2633	0.0014973	0.016828	NM_001355124.1	73724	AI593442	transcript	2.59136	6.75213	-1.38163	0.00321014	0.0495881
mmu-miR-145a-5p	3164.64	8286.18	-1.2633	0.0014973	0.016828	NM_145562.2	231440	AI593442	transcript	15.3222	37.5905	-1.29475	0.00249696	0.043351
mmu-miR-145a-5p	3164.64	8286.18	-1.2633	0.0014973	0.016828	XM_006528007.3	236920	Akirin2	transcript	0.108373	0.927926	-3.09801	0.00240261	0.0424412
mmu-miR-145a-5p	3164.64	8286.18	-1.2633	0.0014973	0.016828	NM_001291835.1	11655	Akirin2	transcript	0.0961463	1.86164	-4.2752	0.00071895	0.0218102
mmu-miR-145a-5p	3164.64	8286.18	-1.2633	0.0014973	0.016828	NM_130892.5	170728	Akirin2	transcript	25.5225	13.9311	0.87346	0.00255076	0.0436594
mmu-miR-145a-5p	3164.64	8286.18	-1.2633	0.0014973	0.016828	NM_011500.3	268980	Akt1	transcript	9.79792	10.3345	-0.0769267	0.00263953	0.0444112
mmu-miR-145a-5p	3164.64	8286.18	-1.2633	0.0014973	0.016828	NM_175022.3	233210	Akt1	transcript	3.51823	6.79684	-0.950013	0.000676499	0.0211566
mmu-miR-145a-5p	3164.64	8286.18	-1.2633	0.0014973	0.016828	NM_001171000.2	74340	Akt1	transcript	5.19366	5.65173	-0.12194	0.00149626	0.0328408
mmu-miR-145a-5p	3164.64	8286.18	-1.2633	0.0014973	0.016828	NM_021472.4	58809	Akt1	transcript	22.7317	10.4096	1.12679	0.00171352	0.0349765
mmu-miR-145a-5p	3164.64	8286.18	-1.2633	0.0014973	0.016828	TCONS_00011063	21843	Aktip	transcript	0	1.86295	#NAME?	0.000394296	0.0162795
mmu-miR-145a-5p	3164.64	8286.18	-1.2633	0.0014973	0.016828	NM_197990.3	69399	Aktip	transcript	3.74703	6.52172	-0.799504	0.00161143	0.0338712
mmu-miR-145a-5p	3164.64	8286.18	-1.2633	0.0014973	0.016828	NM_009061.4	19735	Aktip	transcript	3.92395	10.8135	-1.46246	0.0027111	0.0450388
mmu-miR-145a-5p	3164.64	8286.18	-1.2633	0.0014973	0.016828	NM_027445.3	70510	Aktip	transcript	11.86	0.0243333	8.92895	3.41099e-05	0.0109036
mmu-miR-145a-5p	3164.64	8286.18	-1.2633	0.0014973	0.016828	NM_001159724.1	19294	Aktip	transcript	8.01008	11.2298	-0.487446	0.00303448	0.0482486
mmu-miR-145a-5p	3164.64	8286.18	-1.2633	0.0014973	0.016828	NM_001077411.3	14466	Aktip	transcript	4.48869	1.93451	1.21433	0.000164012	0.011849
mmu-miR-145a-5p	3164.64	8286.18	-1.2633	0.0014973	0.016828	NM_011671.5	22228	Aktip	transcript	22.7224	7.62895	1.57456	0.00309646	0.0487417
mmu-miR-145a-5p	3164.64	8286.18	-1.2633	0.0014973	0.016828	XM_006516544.4	140580	Alas1	transcript	0	0.964251	#NAME?	0.000208101	0.011849
mmu-miR-145a-5p	3164.64	8286.18	-1.2633	0.0014973	0.016828	NM_011677.2	22256	Alas1	transcript	6.75487	1.60334	2.07485	0.000916834	0.0256189
mmu-miR-145a-5p	3164.64	8286.18	-1.2633	0.0014973	0.016828	NM_026034.5	67211	Alas1	transcript	3.50217	4.69398	-0.422564	0.0024496	0.0427911
mmu-miR-145a-5p	3164.64	8286.18	-1.2633	0.0014973	0.016828	NM_026179.2	67469	Alas1	transcript	17.0689	7.261	1.23313	0.000182311	0.011849
mmu-miR-145a-5p	3164.64	8286.18	-1.2633	0.0014973	0.016828	XM_030243724.1	80914	Alas1	transcript	0.0461117	2.38203	-5.69092	6.62482e-05	0.011849
mmu-miR-145a-5p	3164.64	8286.18	-1.2633	0.0014973	0.016828	NM_173753.4	216742	Alas1	transcript	0.672583	6.5177	-3.27658	0.000648488	0.0206452
mmu-miR-145a-5p	3164.64	8286.18	-1.2633	0.0014973	0.016828	NM_029767.2	76846	Alas1	transcript	93.3149	190.361	-1.02856	0.00286744	0.0468157
mmu-miR-145a-5p	3164.64	8286.18	-1.2633	0.0014973	0.016828	NM_175212.4	74868	Alas1	transcript	79.645	32.9378	1.27384	0.000764705	0.0228557
mmu-miR-145a-5p	3164.64	8286.18	-1.2633	0.0014973	0.016828	XM_036165926.1	18575	Alas1	transcript	0.00292067	2.25441	-9.59223	0.000224915	0.0120256
mmu-miR-145a-5p	3164.64	8286.18	-1.2633	0.0014973	0.016828	NM_008434.2	16535	Alas1	transcript	7.63592	13.9324	-0.867575	0.00112383	0.0281926
mmu-miR-145a-5p	3164.64	8286.18	-1.2633	0.0014973	0.016828	NM_026147.6	67427	Alas1	transcript	5.39695	10.3162	-0.934702	0.000949412	0.0260161
mmu-miR-145a-5p	3164.64	8286.18	-1.2633	0.0014973	0.016828	NM_178045.4	213391	Alkbh6	transcript	2.94432	0.459439	2.67999	0.00253891	0.0436594
mmu-miR-145a-5p	3164.64	8286.18	-1.2633	0.0014973	0.016828	NM_026490.2	56284	Alkbh6	transcript	5.12255	3.13969	0.70624	0.00202573	0.0385216
mmu-miR-145a-5p	3164.64	8286.18	-1.2633	0.0014973	0.016828	NM_023158.7	66102	Alox5	transcript	3.90126	1.70179	1.19689	0.000707037	0.0216341
mmu-miR-145a-5p	3164.64	8286.18	-1.2633	0.0014973	0.016828	NM_144545.4	78655	Alox5	transcript	20.27	12.1274	0.741077	0.000310056	0.0139803
mmu-miR-145a-5p	3164.64	8286.18	-1.2633	0.0014973	0.016828	XM_006507470.5	19647	Alox5	transcript	4.54464	4.46107	0.0267746	0.0020459	0.0388008
mmu-miR-145a-5p	3164.64	8286.18	-1.2633	0.0014973	0.016828	NM_029436.3	75785	Alox5	transcript	0.247428	12.2514	-5.6298	1.70221e-05	0.00898899
mmu-miR-145a-5p	3164.64	8286.18	-1.2633	0.0014973	0.016828	NM_008097.2	270076	Alox5	transcript	12.9965	7.51936	0.789442	0.00263891	0.0444112
mmu-miR-145a-5p	3164.64	8286.18	-1.2633	0.0014973	0.016828	TCONS_00000837	213109	Alox5	transcript	0	1.30004	#NAME?	0.000208101	0.011849
mmu-miR-145a-5p	3164.64	8286.18	-1.2633	0.0014973	0.016828	NM_018743.4	102247	Alox5	transcript	13.5676	7.76624	0.804877	0.000326486	0.0144091
mmu-miR-145a-5p	3164.64	8286.18	-1.2633	0.0014973	0.016828	NM_001024504.2	102323	Anapc5	transcript	18.3441	6.86252	1.41851	0.000108632	0.011849
mmu-miR-145a-5p	3164.64	8286.18	-1.2633	0.0014973	0.016828	XM_006511156.2	24127	Anapc5	transcript	0	1.84218	#NAME?	0.000225398	0.0120256
mmu-miR-145a-5p	3164.64	8286.18	-1.2633	0.0014973	0.016828	NM_001162532.1	100038347	Anapc5	transcript	77.6951	75.6235	0.0389891	0.000481253	0.0178948
mmu-miR-145a-5p	3164.64	8286.18	-1.2633	0.0014973	0.016828	XM_036162750.1	99031	Anapc5	transcript	4.28989	0.538524	2.99386	0.000131777	0.011849
mmu-miR-145a-5p	3164.64	8286.18	-1.2633	0.0014973	0.016828	NM_001164441.1	67434	Anapc5	transcript	8.59489	4.39847	0.966478	0.00240277	0.0424412
mmu-miR-145a-5p	3164.64	8286.18	-1.2633	0.0014973	0.016828	NM_001357448.1	59057	Anapc5	transcript	0.89975	1.66028	-0.883828	0.00145457	0.0324519
mmu-miR-145a-5p	3164.64	8286.18	-1.2633	0.0014973	0.016828	NM_009062.3	19736	Anapc5	transcript	6.1042	1.8883	1.69271	0.0018282	0.0363766
mmu-miR-145a-5p	3164.64	8286.18	-1.2633	0.0014973	0.016828	NM_001113563.2	20851	Anapc5	transcript	16.5189	9.88304	0.741088	0.00313081	0.049005
mmu-miR-145a-5p	3164.64	8286.18	-1.2633	0.0014973	0.016828	NM_001164580.1	233812	Anapc5	transcript	3.49234	4.10635	-0.233664	0.000328963	0.0144734
mmu-miR-145a-5p	3164.64	8286.18	-1.2633	0.0014973	0.016828	NM_009031.3	245688	Angptl2	transcript	41.2654	45.1654	-0.130286	0.00188478	0.0369923
mmu-miR-145a-5p	3164.64	8286.18	-1.2633	0.0014973	0.016828	NM_181274.4	66869	Angptl2	transcript	0.87176	2.05209	-1.23509	0.00243894	0.0426927
mmu-miR-145a-5p	3164.64	8286.18	-1.2633	0.0014973	0.016828	NM_001169577.1	22214	Angptl2	transcript	0.0879423	1.41218	-4.00523	0.000335305	0.0146524
mmu-miR-145a-5p	3164.64	8286.18	-1.2633	0.0014973	0.016828	TCONS_00005890	269529	Angptl2	transcript	0.007847	1.65025	-7.71633	0.000222374	0.0120256
mmu-miR-145a-5p	3164.64	8286.18	-1.2633	0.0014973	0.016828	TCONS_00024982	22284	Angptl2	transcript	0.0341417	4.42644	-7.01847	0.000565246	0.0196753
mmu-miR-145a-5p	3164.64	8286.18	-1.2633	0.0014973	0.016828	TCONS_00023739	76594	Angptl2	transcript	0	1.93372	#NAME?	0.000208101	0.011849
mmu-miR-145a-5p	3164.64	8286.18	-1.2633	0.0014973	0.016828	XM_036155419.1	84585	Angptl2	transcript	0.21672	0.992394	-2.19508	0.000148512	0.011849
mmu-miR-145a-5p	3164.64	8286.18	-1.2633	0.0014973	0.016828	XM_006505871.4	21366	Angptl2	transcript	0	11.8486	#NAME?	0.000348779	0.0150187
mmu-miR-145a-5p	3164.64	8286.18	-1.2633	0.0014973	0.016828	NM_001372425.1	234593	Ank	transcript	0	1.53412	#NAME?	8.94309e-05	0.011849
mmu-miR-145a-5p	3164.64	8286.18	-1.2633	0.0014973	0.016828	XM_030248280.2	11512	Ank	transcript	0.0235687	1.77038	-6.23104	0.000785551	0.0231852
mmu-miR-145a-5p	3164.64	8286.18	-1.2633	0.0014973	0.016828	NM_145625.3	75705	Ank	transcript	42.7772	55.7261	-0.381512	0.00107273	0.0276308
mmu-miR-145a-5p	3164.64	8286.18	-1.2633	0.0014973	0.016828	TCONS_00001922	227937	Ank	transcript	1.80779	2.78593	-0.623933	0.0019647	0.0378189
mmu-miR-145a-5p	3164.64	8286.18	-1.2633	0.0014973	0.016828	NM_172513.3	213056	Ank	transcript	2.78856	1.04984	1.40935	0.00125155	0.0297996
mmu-miR-145a-5p	3164.64	8286.18	-1.2633	0.0014973	0.016828	NM_019578.2	56219	Ank	transcript	10.5609	2.37027	2.15561	0.000948566	0.0260161
mmu-miR-145a-5p	3164.64	8286.18	-1.2633	0.0014973	0.016828	XM_006522654.4	74143	Ank3	transcript	0.437384	6.77251	-3.95272	0.000882794	0.0249632
mmu-miR-145a-5p	3164.64	8286.18	-1.2633	0.0014973	0.016828	XM_006527268.4	66980	Ank3	transcript	7.12351	2.22921	1.67606	0.000398742	0.0162795
mmu-miR-145a-5p	3164.64	8286.18	-1.2633	0.0014973	0.016828	NM_153542.1	216011	Ank3	transcript	13.872	5.18166	1.42069	0.000640899	0.0205534
mmu-miR-145a-5p	3164.64	8286.18	-1.2633	0.0014973	0.016828	XM_011245736.3	72193	Ank3	transcript	0	1.69055	#NAME?	0.000208101	0.011849
mmu-miR-145a-5p	3164.64	8286.18	-1.2633	0.0014973	0.016828	NM_012039.2	26951	Ank3	transcript	6.74096	2.60586	1.3712	0.000187795	0.011849
mmu-miR-145a-5p	3164.64	8286.18	-1.2633	0.0014973	0.016828	NM_021883.2	21916	Ank3	transcript	72.5358	52.8586	0.456554	0.00123382	0.0296362
mmu-miR-145a-5p	3164.64	8286.18	-1.2633	0.0014973	0.016828	NM_001033430.4	338523	Ank3	transcript	8.64604	9.2492	-0.0972903	0.00160869	0.0338712
mmu-miR-145a-5p	3164.64	8286.18	-1.2633	0.0014973	0.016828	NM_001130165.2	170719	Ank3	transcript	0.014798	2.56766	-7.43891	0.000177853	0.011849
mmu-miR-145a-5p	3164.64	8286.18	-1.2633	0.0014973	0.016828	NM_133718.4	69981	Ank3	transcript	27.1716	24.7706	0.133471	0.00325487	0.0499953
mmu-miR-145a-5p	3164.64	8286.18	-1.2633	0.0014973	0.016828	TCONS_00020139	16880	Ank3	transcript	0	1.30271	#NAME?	0.000208101	0.011849
mmu-miR-145a-5p	3164.64	8286.18	-1.2633	0.0014973	0.016828	NM_001135112.1	83945	Ank3	transcript	39.0553	23.1091	0.757061	0.00186454	0.036841
mmu-miR-145a-5p	3164.64	8286.18	-1.2633	0.0014973	0.016828	TCONS_00001243	70579	Ank3	transcript	0	3.03869	#NAME?	0.000208101	0.011849
mmu-miR-145a-5p	3164.64	8286.18	-1.2633	0.0014973	0.016828	NM_018779.2	54611	Ank3	transcript	9.7464	25.8013	-1.4045	0.000703119	0.0216341
mmu-miR-145a-5p	3164.64	8286.18	-1.2633	0.0014973	0.016828	TCONS_00022683	68799	Ank3	transcript	4.5466	0.272189	4.06211	0.0015752	0.0335072
mmu-miR-145a-5p	3164.64	8286.18	-1.2633	0.0014973	0.016828	NM_172588.2	218442	Ank3	transcript	4.73797	4.64443	0.028766	0.00297412	0.047773
mmu-miR-145a-5p	3164.64	8286.18	-1.2633	0.0014973	0.016828	NM_011838.4	23936	Ank3	transcript	70.7077	25.7672	1.45633	0.000325774	0.0144091
mmu-miR-145a-5p	3164.64	8286.18	-1.2633	0.0014973	0.016828	NM_026793.2	68632	Ank3	transcript	9.58792	3.6837	1.38006	0.00116025	0.0286773
mmu-miR-145a-5p	3164.64	8286.18	-1.2633	0.0014973	0.016828	TCONS_00007881	56430	Ank3	transcript	0.532009	2.12216	-1.99601	0.00045144	0.0172853
mmu-miR-145a-5p	3164.64	8286.18	-1.2633	0.0014973	0.016828	NM_001368720.1	67933	Ank3	transcript	5.43663	5.40261	0.00905504	0.00188526	0.0369923
mmu-miR-145a-5p	3164.64	8286.18	-1.2633	0.0014973	0.016828	NM_025540.2	66402	Ank3	transcript	0	2.86113	#NAME?	0.000658389	0.0208667
mmu-miR-145a-5p	3164.64	8286.18	-1.2633	0.0014973	0.016828	NM_010169.4	14062	Ankrd12	transcript	8.3276	10.5593	-0.342539	0.00128597	0.0301049
mmu-miR-145a-5p	3164.64	8286.18	-1.2633	0.0014973	0.016828	NM_022315.2	64074	Ankrd12	transcript	7.00857	13.4841	-0.944066	0.000875852	0.0248661
mmu-miR-145a-5p	3164.64	8286.18	-1.2633	0.0014973	0.016828	NM_020496.3	57246	Ankrd12	transcript	0.561424	1.58799	-1.50004	0.000600662	0.0199437
mmu-miR-145a-5p	3164.64	8286.18	-1.2633	0.0014973	0.016828	NM_001365015.1	225341	Ankrd12	transcript	5.10764	0.034765	7.19888	0.000396087	0.0162795
mmu-miR-145a-5p	3164.64	8286.18	-1.2633	0.0014973	0.016828	NM_025575.3	66460	Ankrd12	transcript	10.3227	6.93644	0.573558	0.00161444	0.0338841
mmu-miR-145a-5p	3164.64	8286.18	-1.2633	0.0014973	0.016828	NM_001205076.1	59091	Ankrd12	transcript	0.74834	2.54809	-1.76765	0.000966321	0.0262258
mmu-miR-145a-5p	3164.64	8286.18	-1.2633	0.0014973	0.016828	NM_172694.2	230316	Ankrd12	transcript	8.61234	3.69976	1.21897	0.00144528	0.0322955
mmu-miR-145a-5p	3164.64	8286.18	-1.2633	0.0014973	0.016828	NM_009425.2	22035	Ankrd12	transcript	5.83158	2.24147	1.37944	0.000523065	0.0189037
mmu-miR-145a-5p	3164.64	8286.18	-1.2633	0.0014973	0.016828	NM_181325.4	18408	Ankrd12	transcript	4.43938	1.20821	1.87748	0.00066888	0.0210111
mmu-miR-145a-5p	3164.64	8286.18	-1.2633	0.0014973	0.016828	NM_145991.2	214498	Ankrd12	transcript	0.353721	3.55633	-3.32971	0.000125934	0.011849
mmu-miR-145a-5p	3164.64	8286.18	-1.2633	0.0014973	0.016828	NM_133218.2	170753	Ankrd12	transcript	4.21261	7.10953	-0.755041	0.00042631	0.0168243
mmu-miR-145a-5p	3164.64	8286.18	-1.2633	0.0014973	0.016828	TCONS_00001279	226432	Ankrd12	transcript	5.41465	0.03601	7.23233	0.00192567	0.0375518
mmu-miR-145a-5p	3164.64	8286.18	-1.2633	0.0014973	0.016828	NM_176933.4	319520	Ankrd12	transcript	0.745019	2.95323	-1.98694	7.6233e-05	0.011849
mmu-miR-145a-5p	3164.64	8286.18	-1.2633	0.0014973	0.016828	XM_036158779.1	64652	Ankrd12	transcript	0.085711	1.0889	-3.66725	3.06078e-05	0.0109036
mmu-miR-145a-5p	3164.64	8286.18	-1.2633	0.0014973	0.016828	NM_001013390.3	399548	Ankrd12	transcript	45.134	2.15251	4.39012	0.000262235	0.0127318
mmu-miR-145a-5p	3164.64	8286.18	-1.2633	0.0014973	0.016828	NM_008663.2	17921	Ankrd12	transcript	2.93167	0.100171	4.87119	0.00182502	0.0363643
mmu-miR-145a-5p	3164.64	8286.18	-1.2633	0.0014973	0.016828	NM_001358780.1	17181	Ankrd12	transcript	4.14943	3.85625	0.105713	0.00311384	0.0489067
mmu-miR-145a-5p	3164.64	8286.18	-1.2633	0.0014973	0.016828	XM_006539897.3	233103	Ankrd12	transcript	0.00112633	0.853869	-9.56624	0.000196093	0.011849
mmu-miR-145a-5p	3164.64	8286.18	-1.2633	0.0014973	0.016828	XM_030254092.2	12589	Ankrd12	transcript	0	2.06927	#NAME?	0.000208101	0.011849
mmu-miR-145a-5p	3164.64	8286.18	-1.2633	0.0014973	0.016828	NM_028758.2	74105	Ankrd12	transcript	8.41225	10.3445	-0.298296	0.000569408	0.0197716
mmu-miR-145a-5p	3164.64	8286.18	-1.2633	0.0014973	0.016828	TCONS_00015770	327978	Ankrd33b	transcript	3.62261	0.745147	2.28143	0.00305254	0.0483264
mmu-miR-145a-5p	3164.64	8286.18	-1.2633	0.0014973	0.016828	NM_183179.1	240595	Ankrd33b	transcript	3.68252	0.490782	2.90754	0.00268645	0.0449153
mmu-miR-145a-5p	3164.64	8286.18	-1.2633	0.0014973	0.016828	TCONS_00016863	76626	Ankrd33b	transcript	0	1.46752	#NAME?	0.000208101	0.011849
mmu-miR-145a-5p	3164.64	8286.18	-1.2633	0.0014973	0.016828	XM_006500766.4	18415	Ankrd33b	transcript	4.38991	2.19873	0.997525	0.00152571	0.0331249
mmu-miR-145a-5p	3164.64	8286.18	-1.2633	0.0014973	0.016828	NM_026302.4	67665	Ankrd33b	transcript	9.83586	11.1804	-0.184853	0.00319621	0.0495412
mmu-miR-145a-5p	3164.64	8286.18	-1.2633	0.0014973	0.016828	NM_025454.2	66262	Ankrd33b	transcript	2.38478	4.37866	-0.876636	0.000978861	0.0262643
mmu-miR-145a-5p	3164.64	8286.18	-1.2633	0.0014973	0.016828	NM_178653.3	109232	Ankrd33b	transcript	16.8211	20.2728	-0.269275	0.00213623	0.0397687
mmu-miR-145a-5p	3164.64	8286.18	-1.2633	0.0014973	0.016828	NM_028814.4	74200	Ankrd33b	transcript	5.63096	1.05907	2.41059	0.000336136	0.0146524
novel_41	0	5.98465	-1.8996	0.0055992	0.045231	NM_010473.2	15464	Ankrd33b	transcript	161.522	120.507	0.422612	9.40168e-05	0.011849
novel_41	0	5.98465	-1.8996	0.0055992	0.045231	NM_001162532.1	100038347	Ankrd33b	transcript	77.6951	75.6235	0.0389891	0.000481253	0.0178948
novel_41	0	5.98465	-1.8996	0.0055992	0.045231	XM_006534391.5	75580	Ankrd33b	transcript	0	1.27003	#NAME?	0.000208101	0.011849
novel_41	0	5.98465	-1.8996	0.0055992	0.045231	XM_030250848.1	228998	Ankrd33b	transcript	0	1.08784	#NAME?	0.000208101	0.011849
novel_41	0	5.98465	-1.8996	0.0055992	0.045231	NM_177740.5	244058	Ankrd33b	transcript	7.57193	3.28122	1.20643	0.00224012	0.0407375
novel_41	0	5.98465	-1.8996	0.0055992	0.045231	NM_025557.1	66425	Ankrd33b	transcript	49.4431	16.3196	1.59917	7.99887e-05	0.011849
novel_41	0	5.98465	-1.8996	0.0055992	0.045231	XM_036155254.1	69632	Ankrd33b	transcript	4.65604	2.21758	1.07012	6.94014e-06	0.00809735
novel_41	0	5.98465	-1.8996	0.0055992	0.045231	NM_008617.2	17448	Ankrd33b	transcript	542.541	345.903	0.649364	0.000236176	0.012135
novel_41	0	5.98465	-1.8996	0.0055992	0.045231	NM_010101.4	13610	Ankrd33b	transcript	6.62156	3.85762	0.779461	0.0016731	0.034352
novel_41	0	5.98465	-1.8996	0.0055992	0.045231	NM_145447.2	217721	Ankrd33b	transcript	0.565025	2.72949	-2.27225	0.000769372	0.0228985
novel_41	0	5.98465	-1.8996	0.0055992	0.045231	NM_007982.2	14083	Ankrd33b	transcript	0.671203	2.17258	-1.69458	0.00163597	0.0341585
novel_41	0	5.98465	-1.8996	0.0055992	0.045231	NM_011435.3	20657	Ankrd33b	transcript	14.5721	6.60321	1.14197	0.00303919	0.0482692
novel_41	0	5.98465	-1.8996	0.0055992	0.045231	NM_023668.3	83431	Ankrd33b	transcript	9.7942	3.82846	1.35516	0.00122006	0.0294455
novel_41	0	5.98465	-1.8996	0.0055992	0.045231	NM_199029.2	380912	Ankrd33b	transcript	0.873976	4.10068	-2.2302	8.95514e-05	0.011849
novel_41	0	5.98465	-1.8996	0.0055992	0.045231	NM_025788.3	66830	Ankrd33b	transcript	10.8813	6.39523	0.766786	0.000381223	0.0160261
novel_41	0	5.98465	-1.8996	0.0055992	0.045231	NM_011500.3	268980	Ankrd33b	transcript	9.79792	10.3345	-0.0769267	0.00263953	0.0444112
novel_41	0	5.98465	-1.8996	0.0055992	0.045231	NM_001362456.1	16509	Ankrd33b	transcript	0.083644	4.13095	-5.62607	0.00052909	0.0190728
novel_41	0	5.98465	-1.8996	0.0055992	0.045231	NM_029182.1	75141	Ankrd33b	transcript	0.912002	5.28095	-2.53369	0.000206413	0.011849
novel_41	0	5.98465	-1.8996	0.0055992	0.045231	XM_036158144.1	68675	Ankrd33b	transcript	0	2.19166	#NAME?	0.000259638	0.0127318
novel_41	0	5.98465	-1.8996	0.0055992	0.045231	NM_001145034.1	620695	Ankrd33b	transcript	2.39986	3.94997	-0.718895	0.00234297	0.0418046
novel_41	0	5.98465	-1.8996	0.0055992	0.045231	XM_030248670.2	56274	Ankrd33b	transcript	0	2.14451	#NAME?	0.000713859	0.0217489
novel_41	0	5.98465	-1.8996	0.0055992	0.045231	NM_008138.5	14678	Ankrd40	transcript	53.7036	64.7581	-0.270042	4.59345e-05	0.011849
novel_41	0	5.98465	-1.8996	0.0055992	0.045231	TCONS_00022825	74762	Ankrd40	transcript	2.27339	0	Inf	0.000284564	0.0132564
novel_41	0	5.98465	-1.8996	0.0055992	0.045231	XM_030243724.1	80914	Ankrd40	transcript	0.0461117	2.38203	-5.69092	6.62482e-05	0.011849
novel_41	0	5.98465	-1.8996	0.0055992	0.045231	TCONS_00007881	56430	Ankrd40	transcript	0.532009	2.12216	-1.99601	0.00045144	0.0172853
novel_41	0	5.98465	-1.8996	0.0055992	0.045231	NM_175212.4	74868	Ankrd40	transcript	79.645	32.9378	1.27384	0.000764705	0.0228557
novel_41	0	5.98465	-1.8996	0.0055992	0.045231	NM_198626.2	268880	Ankrd40	transcript	4.97798	3.01811	0.721913	0.0023038	0.0414115
novel_41	0	5.98465	-1.8996	0.0055992	0.045231	NM_001359858.1	66923	Ankrd40	transcript	0	1.00614	#NAME?	0.000208101	0.011849
novel_41	0	5.98465	-1.8996	0.0055992	0.045231	NM_198006.4	76178	Ankrd40	transcript	50.2161	22.0338	1.18843	0.00112898	0.0281926
novel_41	0	5.98465	-1.8996	0.0055992	0.045231	NM_019694.2	56384	Ano5	transcript	25.4967	5.73717	2.1519	0.000146779	0.011849
novel_41	0	5.98465	-1.8996	0.0055992	0.045231	TCONS_00013150	71268	Ano5	transcript	2.94686	4.51077	-0.614196	6.3817e-06	0.00809735
novel_41	0	5.98465	-1.8996	0.0055992	0.045231	NM_008027.2	14251	Ano5	transcript	51.7497	69.1708	-0.41861	0.000609558	0.0199437
novel_41	0	5.98465	-1.8996	0.0055992	0.045231	NM_001370902.1	665700	Ano5	transcript	7.60778	1.38907	2.45336	3.91995e-05	0.0115968
mmu-miR-133a-3p	33387.1	102338	-1.3674	0.006259	0.049029	NM_025647.3	66588	Ano5	transcript	13.6657	14.2706	-0.0624846	0.000535393	0.0191482
mmu-miR-133a-3p	33387.1	102338	-1.3674	0.006259	0.049029	NM_001362974.1	67733	Ano5	transcript	2.16401	3.2316	-0.578541	0.0010405	0.0272977
mmu-miR-133a-3p	33387.1	102338	-1.3674	0.006259	0.049029	XM_036165700.1	320404	Ano5	transcript	0	6.46645	#NAME?	0.000252332	0.0125803
mmu-miR-133a-3p	33387.1	102338	-1.3674	0.006259	0.049029	NM_008681.2	17988	Ano5	transcript	8.39281	13.4879	-0.684435	0.000598646	0.0199437
mmu-miR-133a-3p	33387.1	102338	-1.3674	0.006259	0.049029	XM_006500766.4	18415	Ano5	transcript	4.38991	2.19873	0.997525	0.00152571	0.0331249
mmu-miR-133a-3p	33387.1	102338	-1.3674	0.006259	0.049029	NM_026302.4	67665	Ano5	transcript	9.83586	11.1804	-0.184853	0.00319621	0.0495412
mmu-miR-133a-3p	33387.1	102338	-1.3674	0.006259	0.049029	NM_001362370.1	81601	Ano5	transcript	0.382161	1.14742	-1.58615	0.000604559	0.0199437
mmu-miR-133a-3p	33387.1	102338	-1.3674	0.006259	0.049029	NM_025454.2	66262	Ano5	transcript	2.38478	4.37866	-0.876636	0.000978861	0.0262643
mmu-miR-133a-3p	33387.1	102338	-1.3674	0.006259	0.049029	XM_006507189.4	109264	Ano5	transcript	12.3611	5.99776	1.04331	1.94183e-05	0.00898899
mmu-miR-133a-3p	33387.1	102338	-1.3674	0.006259	0.049029	XM_036154756.1	20623	Ano5	transcript	0	1.30688	#NAME?	0.000208101	0.011849
mmu-miR-133a-3p	33387.1	102338	-1.3674	0.006259	0.049029	NM_011065.5	18626	Ano5	transcript	5.40945	15.0573	-1.47691	0.00254728	0.0436594
mmu-miR-133a-3p	33387.1	102338	-1.3674	0.006259	0.049029	NM_001360132.1	20130	Ano5	transcript	0	1.46932	#NAME?	0.000208101	0.011849
mmu-miR-133a-3p	33387.1	102338	-1.3674	0.006259	0.049029	TCONS_00016650	13681	Ano5	transcript	0.356588	12.2909	-5.10719	6.66118e-05	0.011849
mmu-miR-133a-3p	33387.1	102338	-1.3674	0.006259	0.049029	NM_018738.4	16145	Ano5	transcript	8.95302	4.35064	1.04115	0.000598084	0.0199437
mmu-miR-133a-3p	33387.1	102338	-1.3674	0.006259	0.049029	TCONS_00001279	226432	Ano5	transcript	5.41465	0.03601	7.23233	0.00192567	0.0375518
mmu-miR-133a-3p	33387.1	102338	-1.3674	0.006259	0.049029	NM_133218.2	170753	Ano5	transcript	4.21261	7.10953	-0.755041	0.00042631	0.0168243
mmu-miR-133a-3p	33387.1	102338	-1.3674	0.006259	0.049029	NM_009088.3	20019	Ano5	transcript	11.1603	5.17423	1.10897	4.63453e-05	0.011849
mmu-miR-133a-3p	33387.1	102338	-1.3674	0.006259	0.049029	XM_036158779.1	64652	Ano5	transcript	0.085711	1.0889	-3.66725	3.06078e-05	0.0109036
mmu-miR-133a-3p	33387.1	102338	-1.3674	0.006259	0.049029	NM_001358780.1	17181	Ano5	transcript	4.14943	3.85625	0.105713	0.00311384	0.0489067
mmu-miR-133a-3p	33387.1	102338	-1.3674	0.006259	0.049029	NM_028105.4	72113	Anp32e	transcript	3.00601	0.750733	2.00148	0.00286836	0.0468157
mmu-miR-133a-3p	33387.1	102338	-1.3674	0.006259	0.049029	NM_008707.4	18107	Anp32e	transcript	14.258	9.43261	0.596042	0.00291161	0.0472967
mmu-miR-133a-3p	33387.1	102338	-1.3674	0.006259	0.049029	TCONS_00001243	70579	Anp32e	transcript	0	3.03869	#NAME?	0.000208101	0.011849
mmu-miR-133a-3p	33387.1	102338	-1.3674	0.006259	0.049029	NM_001359858.1	66923	Anp32e	transcript	0	1.00614	#NAME?	0.000208101	0.011849
mmu-miR-133a-3p	33387.1	102338	-1.3674	0.006259	0.049029	TCONS_00022683	68799	Anp32e	transcript	4.5466	0.272189	4.06211	0.0015752	0.0335072
mmu-miR-133a-3p	33387.1	102338	-1.3674	0.006259	0.049029	TCONS_00013920	235682	Anp32e	transcript	5.17837	0.595973	3.11918	0.00126708	0.0299678
mmu-miR-133a-3p	33387.1	102338	-1.3674	0.006259	0.049029	XM_006532843.2	216739	Anp32e	transcript	4.0953	0.00190133	11.0727	0.000944224	0.0260079
mmu-miR-133a-3p	33387.1	102338	-1.3674	0.006259	0.049029	NM_011838.4	23936	Anp32e	transcript	70.7077	25.7672	1.45633	0.000325774	0.0144091
mmu-miR-133a-3p	33387.1	102338	-1.3674	0.006259	0.049029	NM_001370902.1	665700	Anp32e	transcript	7.60778	1.38907	2.45336	3.91995e-05	0.0115968
mmu-miR-133a-3p	33387.1	102338	-1.3674	0.006259	0.049029	NM_009238.3	20677	Anp32e	transcript	5.1395	21.1398	-2.04026	0.00111919	0.0281926
mmu-miR-133a-3p	33387.1	102338	-1.3674	0.006259	0.049029	NM_011207.2	545622	Anp32e	transcript	0.0298263	2.85143	-6.57895	5.67792e-05	0.011849
mmu-miR-133a-3p	33387.1	102338	-1.3674	0.006259	0.049029	NM_010169.4	14062	Anp32e	transcript	8.3276	10.5593	-0.342539	0.00128597	0.0301049
mmu-miR-133a-3p	33387.1	102338	-1.3674	0.006259	0.049029	NM_025540.2	66402	Anp32e	transcript	0	2.86113	#NAME?	0.000658389	0.0208667
mmu-miR-133a-3p	33387.1	102338	-1.3674	0.006259	0.049029	NM_025575.3	66460	Anp32e	transcript	10.3227	6.93644	0.573558	0.00161444	0.0338841
mmu-miR-133a-3p	33387.1	102338	-1.3674	0.006259	0.049029	NM_001081130.2	239017	Anp32e	transcript	76.3348	14.1903	2.42743	0.000373849	0.0158572
mmu-miR-133a-3p	33387.1	102338	-1.3674	0.006259	0.049029	NM_172694.2	230316	Anp32e	transcript	8.61234	3.69976	1.21897	0.00144528	0.0322955
mmu-miR-133a-3p	33387.1	102338	-1.3674	0.006259	0.049029	TCONS_00018645	238505	Anxa5	transcript	31.0669	4.54431	2.77324	0.000120377	0.011849
mmu-miR-133a-3p	33387.1	102338	-1.3674	0.006259	0.049029	NM_023824.3	76498	Anxa5	transcript	11.489	5.29525	1.11749	0.00313365	0.049005
mmu-miR-133a-3p	33387.1	102338	-1.3674	0.006259	0.049029	NM_001190985.1	14768	Apba3	transcript	4.04587	1.43319	1.49722	0.00208825	0.0392885
mmu-miR-133a-3p	33387.1	102338	-1.3674	0.006259	0.049029	NM_007428.4	11606	Appl2	transcript	0	2.24548	#NAME?	0.00291553	0.0472967
mmu-miR-133a-3p	33387.1	102338	-1.3674	0.006259	0.049029	NM_001110843.1	12293	Appl2	transcript	5.55837	0	Inf	9.14502e-06	0.00809735
mmu-miR-133a-3p	33387.1	102338	-1.3674	0.006259	0.049029	NM_001033430.4	338523	Appl2	transcript	8.64604	9.2492	-0.0972903	0.00160869	0.0338712
mmu-miR-133a-3p	33387.1	102338	-1.3674	0.006259	0.049029	NM_175398.4	109050	Appl2	transcript	13.7843	2.56575	2.42558	0.000824044	0.0239717
mmu-miR-133a-3p	33387.1	102338	-1.3674	0.006259	0.049029	NM_133718.4	69981	Appl2	transcript	27.1716	24.7706	0.133471	0.00325487	0.0499953
mmu-miR-133a-3p	33387.1	102338	-1.3674	0.006259	0.049029	NM_001013786.3	432731	Appl2	transcript	0	1.47175	#NAME?	0.000843935	0.0243504
mmu-miR-133a-3p	33387.1	102338	-1.3674	0.006259	0.049029	NM_178651.4	109108	Appl2	transcript	44.0714	20.9427	1.07339	0.00170536	0.0348627
mmu-miR-133a-3p	33387.1	102338	-1.3674	0.006259	0.049029	XM_036159861.1	209018	Appl2	transcript	0.00772867	1.02763	-7.05489	0.00267121	0.0448378
mmu-miR-133a-3p	33387.1	102338	-1.3674	0.006259	0.049029	NM_001135112.1	83945	Appl2	transcript	39.0553	23.1091	0.757061	0.00186454	0.036841
mmu-miR-133a-3p	33387.1	102338	-1.3674	0.006259	0.049029	XM_006527267.5	66866	Appl2	transcript	4.92495	2.38861	1.04394	0.000595022	0.0199437
mmu-miR-133a-3p	33387.1	102338	-1.3674	0.006259	0.049029	NM_001025572.1	106585	Arfgap1	transcript	2.84917	4.56201	-0.67913	0.0027118	0.0450388
mmu-miR-133a-3p	33387.1	102338	-1.3674	0.006259	0.049029	XM_006505871.4	21366	Arfgap1	transcript	0	11.8486	#NAME?	0.000348779	0.0150187
mmu-miR-133a-3p	33387.1	102338	-1.3674	0.006259	0.049029	XM_036155254.1	69632	Arfgap1	transcript	4.65604	2.21758	1.07012	6.94014e-06	0.00809735
mmu-miR-133a-3p	33387.1	102338	-1.3674	0.006259	0.049029	XM_030248280.2	11512	Arfgap1	transcript	0.0235687	1.77038	-6.23104	0.000785551	0.0231852
mmu-miR-133a-3p	33387.1	102338	-1.3674	0.006259	0.049029	NM_009565.5	22724	Arfgap1	transcript	4.12497	2.16341	0.931079	0.00148296	0.0328266
mmu-miR-133a-3p	33387.1	102338	-1.3674	0.006259	0.049029	NM_153136.5	213484	Arfgap1	transcript	4.78104	1.31867	1.85824	0.00059672	0.0199437
mmu-miR-133a-3p	33387.1	102338	-1.3674	0.006259	0.049029	TCONS_00001922	227937	Arfgap1	transcript	1.80779	2.78593	-0.623933	0.0019647	0.0378189
mmu-miR-133a-3p	33387.1	102338	-1.3674	0.006259	0.049029	NM_145625.3	75705	Arfgap1	transcript	42.7772	55.7261	-0.381512	0.00107273	0.0276308
mmu-miR-133a-3p	33387.1	102338	-1.3674	0.006259	0.049029	NM_001359990.1	264064	Arhgef12	transcript	0.00769333	1.92256	-7.96521	0.000280714	0.0131685
mmu-miR-133a-3p	33387.1	102338	-1.3674	0.006259	0.049029	NM_172513.3	213056	Arhgef12	transcript	2.78856	1.04984	1.40935	0.00125155	0.0297996
mmu-miR-133a-3p	33387.1	102338	-1.3674	0.006259	0.049029	TCONS_00024776	54132	Arhgef12	transcript	0	3.89536	#NAME?	8.32405e-06	0.00809735
mmu-miR-133a-3p	33387.1	102338	-1.3674	0.006259	0.049029	TCONS_00014197	11735	Arhgef12	transcript	4.56823	0.932611	2.29229	0.00112965	0.0281926
mmu-miR-133a-3p	33387.1	102338	-1.3674	0.006259	0.049029	NM_001379355.1	68428	Arhgef12	transcript	5.88743	0.378303	3.96002	0.00176546	0.0355779
mmu-miR-133a-3p	33387.1	102338	-1.3674	0.006259	0.049029	TCONS_00018911	238673	Arhgef12	transcript	0	0.820108	#NAME?	0.000208101	0.011849
mmu-miR-133a-3p	33387.1	102338	-1.3674	0.006259	0.049029	NM_010664.2	16668	Arhgef12	transcript	0.027038	1.77298	-6.03505	0.00227533	0.041197
mmu-miR-133a-3p	33387.1	102338	-1.3674	0.006259	0.049029	XM_030249608.1	193813	Arhgef12	transcript	0	1.48354	#NAME?	0.00144271	0.0322889
mmu-miR-133a-3p	33387.1	102338	-1.3674	0.006259	0.049029	NM_053159.4	94062	Arhgef12	transcript	44.4713	20.8991	1.08943	1.53811e-06	0.00606699
mmu-miR-133a-3p	33387.1	102338	-1.3674	0.006259	0.049029	XM_036155747.1	216190	Arhgef12	transcript	0	2.58266	#NAME?	0.00257583	0.0439661
mmu-miR-133a-3p	33387.1	102338	-1.3674	0.006259	0.049029	NM_001037859.2	12978	Arhgef12	transcript	16.1218	5.74739	1.48803	0.00326079	0.0499953
mmu-miR-133a-3p	33387.1	102338	-1.3674	0.006259	0.049029	NM_008444.4	16569	Arhgef12	transcript	3.70473	1.55262	1.25466	0.000617896	0.0200774
mmu-miR-133a-3p	33387.1	102338	-1.3674	0.006259	0.049029	XM_011239063.3	227634	Arhgef12	transcript	0.006683	0.967055	-7.17696	0.000213459	0.0119058
mmu-miR-133a-3p	33387.1	102338	-1.3674	0.006259	0.049029	NM_016709.2	11992	Arhgef12	transcript	41.6289	23.1108	0.849015	0.00102481	0.0269859
mmu-miR-133a-3p	33387.1	102338	-1.3674	0.006259	0.049029	NM_023505.2	69367	Arhgef12	transcript	0	0.920794	#NAME?	0.000208101	0.011849
mmu-miR-133a-3p	33387.1	102338	-1.3674	0.006259	0.049029	TCONS_00000331	347722	Arhgef12	transcript	0.0155523	1.00315	-6.01126	0.000242995	0.0123388
mmu-miR-133a-3p	33387.1	102338	-1.3674	0.006259	0.049029	NM_027445.3	70510	Arhgef12	transcript	11.86	0.0243333	8.92895	3.41099e-05	0.0109036
mmu-miR-133a-3p	33387.1	102338	-1.3674	0.006259	0.049029	NM_172338.2	214063	Arhgef12	transcript	8.89771	4.23916	1.06965	0.000105129	0.011849
mmu-miR-133a-3p	33387.1	102338	-1.3674	0.006259	0.049029	XM_006511665.5	20347	Arhgef12	transcript	0.0735617	2.21499	-4.9122	0.000737048	0.0222639
mmu-miR-133a-3p	33387.1	102338	-1.3674	0.006259	0.049029	XM_030243724.1	80914	Arhgef12	transcript	0.0461117	2.38203	-5.69092	6.62482e-05	0.011849
mmu-miR-133a-3p	33387.1	102338	-1.3674	0.006259	0.049029	NM_029767.2	76846	Armc10	transcript	93.3149	190.361	-1.02856	0.00286744	0.0468157
mmu-miR-133a-3p	33387.1	102338	-1.3674	0.006259	0.049029	NM_008434.2	16535	Armc10	transcript	7.63592	13.9324	-0.867575	0.00112383	0.0281926
mmu-miR-133a-3p	33387.1	102338	-1.3674	0.006259	0.049029	NM_019651.2	56294	Armc10	transcript	5.47393	4.63783	0.239129	0.00119187	0.0291125
mmu-miR-133a-3p	33387.1	102338	-1.3674	0.006259	0.049029	NM_178045.4	213391	Armc10	transcript	2.94432	0.459439	2.67999	0.00253891	0.0436594
mmu-miR-133a-3p	33387.1	102338	-1.3674	0.006259	0.049029	TCONS_00022839	57261	Armc10	transcript	0.240581	1.86374	-2.9536	0.00196092	0.0378189
mmu-miR-133a-3p	33387.1	102338	-1.3674	0.006259	0.049029	NM_023908.2	108116	Armc10	transcript	17.9173	6.81677	1.39419	4.78882e-05	0.011849
mmu-miR-133a-3p	33387.1	102338	-1.3674	0.006259	0.049029	NM_018758.2	57267	Aspn	transcript	14.5787	2.63837	2.46615	0.0011045	0.0280538
mmu-miR-133a-3p	33387.1	102338	-1.3674	0.006259	0.049029	TCONS_00021604	66626	Aspn	transcript	0.013365	0.954189	-6.15774	0.000279953	0.0131685
mmu-miR-133a-3p	33387.1	102338	-1.3674	0.006259	0.049029	NM_153484.3	21685	Atp11b	transcript	18.8436	3.54891	2.40862	0.00060823	0.0199437
mmu-miR-133a-3p	33387.1	102338	-1.3674	0.006259	0.049029	NM_001012477.2	20315	Atp11b	transcript	41.9226	8.72303	2.26483	0.00250906	0.0434547
mmu-let-7f-1-3p	16.3024	2.89496	2.0064	0.00039604	0.0053882	NM_018798.2	54609	Atp11b	transcript	5.40739	8.28177	-0.615007	0.00218719	0.0402415
mmu-let-7f-1-3p	16.3024	2.89496	2.0064	0.00039604	0.0053882	XM_030243769.1	93691	Atp11b	transcript	0.003252	2.77016	-9.73443	0.0006671	0.0210018
mmu-let-7f-1-3p	16.3024	2.89496	2.0064	0.00039604	0.0053882	NM_001253843.1	28000	Atp11b	transcript	5.91357	8.65074	-0.548794	0.00248757	0.043257
mmu-let-7f-1-3p	16.3024	2.89496	2.0064	0.00039604	0.0053882	TCONS_00011063	21843	Atp11b	transcript	0	1.86295	#NAME?	0.000394296	0.0162795
mmu-let-7f-1-3p	16.3024	2.89496	2.0064	0.00039604	0.0053882	TCONS_00021414	56637	Atp11b	transcript	0	3.22604	#NAME?	0.000208101	0.011849
mmu-let-7f-1-3p	16.3024	2.89496	2.0064	0.00039604	0.0053882	NM_178651.4	109108	Atp2b1	transcript	44.0714	20.9427	1.07339	0.00170536	0.0348627
mmu-let-7f-1-3p	16.3024	2.89496	2.0064	0.00039604	0.0053882	XM_006522654.4	74143	Atp2b1	transcript	0.437384	6.77251	-3.95272	0.000882794	0.0249632
mmu-let-7f-1-3p	16.3024	2.89496	2.0064	0.00039604	0.0053882	XM_036162959.1	19299	Atp2b1	transcript	16.611	2.38557	2.79974	0.000196089	0.011849
mmu-let-7f-1-3p	16.3024	2.89496	2.0064	0.00039604	0.0053882	XM_017317866.3	225131	Atp2b1	transcript	0.119621	1.86033	-3.95902	0.00123663	0.0296436
mmu-let-7f-1-3p	16.3024	2.89496	2.0064	0.00039604	0.0053882	NM_012039.2	26951	Atp2b1	transcript	6.74096	2.60586	1.3712	0.000187795	0.011849
mmu-let-7f-1-3p	16.3024	2.89496	2.0064	0.00039604	0.0053882	NM_153542.1	216011	Atp2b1	transcript	13.872	5.18166	1.42069	0.000640899	0.0205534
mmu-let-7f-1-3p	16.3024	2.89496	2.0064	0.00039604	0.0053882	XM_011245736.3	72193	Atp2b1	transcript	0	1.69055	#NAME?	0.000208101	0.011849
mmu-let-7f-1-3p	16.3024	2.89496	2.0064	0.00039604	0.0053882	NM_008467.4	16649	Atp2b1	transcript	40.2608	22.3532	0.848894	0.00138369	0.0314147
mmu-let-7f-1-3p	16.3024	2.89496	2.0064	0.00039604	0.0053882	XM_036161518.1	22359	Atp2b1	transcript	43.687	2.02854	4.42869	3.29608e-05	0.0109036
mmu-let-7f-1-3p	16.3024	2.89496	2.0064	0.00039604	0.0053882	NM_016957.3	15331	Atp2b1	transcript	0.000283	1.33388	-12.2025	0.00019752	0.011849
mmu-let-7f-1-3p	16.3024	2.89496	2.0064	0.00039604	0.0053882	XM_006526714.5	16452	Atp2b1	transcript	0.172179	0.9265	-2.42788	0.00148028	0.0328187
mmu-let-7f-1-3p	16.3024	2.89496	2.0064	0.00039604	0.0053882	TCONS_00002486	68295	Atp2c1	transcript	0	1.18122	#NAME?	0.000208101	0.011849
mmu-let-7f-1-3p	16.3024	2.89496	2.0064	0.00039604	0.0053882	NM_026490.2	56284	Atp2c1	transcript	5.12255	3.13969	0.70624	0.00202573	0.0385216
mmu-let-7f-1-3p	16.3024	2.89496	2.0064	0.00039604	0.0053882	XM_011238527.4	269198	Atp2c1	transcript	0.130446	1.37408	-3.39694	0.00227693	0.041197
mmu-let-7f-1-3p	16.3024	2.89496	2.0064	0.00039604	0.0053882	XM_036165926.1	18575	Atp2c1	transcript	0.00292067	2.25441	-9.59223	0.000224915	0.0120256
mmu-let-7f-1-3p	16.3024	2.89496	2.0064	0.00039604	0.0053882	NM_030225.4	78920	Atp2c1	transcript	181.845	108.705	0.742289	0.0025797	0.043979
mmu-let-7f-1-3p	16.3024	2.89496	2.0064	0.00039604	0.0053882	NM_198626.2	268880	Atp2c1	transcript	4.97798	3.01811	0.721913	0.0023038	0.0414115
mmu-let-7f-1-3p	16.3024	2.89496	2.0064	0.00039604	0.0053882	NM_001080131.2	21917	Atp2c1	transcript	0	2.27004	#NAME?	6.13974e-05	0.011849
mmu-let-7f-1-3p	16.3024	2.89496	2.0064	0.00039604	0.0053882	NM_018779.2	54611	Atp2c1	transcript	9.7464	25.8013	-1.4045	0.000703119	0.0216341
mmu-let-7f-1-3p	16.3024	2.89496	2.0064	0.00039604	0.0053882	TCONS_00023188	20541	Atp2c1	transcript	20.6975	50.4304	-1.28484	0.00253048	0.0436594
mmu-let-7f-1-3p	16.3024	2.89496	2.0064	0.00039604	0.0053882	XM_036163810.1	18027	Atp2c1	transcript	0	1.75944	#NAME?	0.00117499	0.0288995
mmu-let-7f-1-3p	16.3024	2.89496	2.0064	0.00039604	0.0053882	NM_133887.4	100226	Atp2c1	transcript	18.1157	17.7267	0.0313165	0.00297755	0.047773
mmu-let-7f-1-3p	16.3024	2.89496	2.0064	0.00039604	0.0053882	TCONS_00015404	72947	Auh	transcript	0.112385	1.99484	-4.14975	0.000153106	0.011849
mmu-let-7f-1-3p	16.3024	2.89496	2.0064	0.00039604	0.0053882	NM_009433.3	22110	Auh	transcript	32.3123	27.2293	0.246923	0.000539287	0.0191482
mmu-let-7f-1-3p	16.3024	2.89496	2.0064	0.00039604	0.0053882	NM_011782.2	23794	Auh	transcript	7.2282	4.15903	0.79739	0.0015713	0.0335072
mmu-let-7f-1-3p	16.3024	2.89496	2.0064	0.00039604	0.0053882	NM_001024606.2	382051	Auh	transcript	14.6334	3.49019	2.06789	0.00110784	0.0280764
mmu-let-7f-1-3p	16.3024	2.89496	2.0064	0.00039604	0.0053882	NM_001025947.2	74006	Auh	transcript	14.8124	7.23539	1.03366	0.00279508	0.0459906
mmu-let-7f-1-3p	16.3024	2.89496	2.0064	0.00039604	0.0053882	NM_001162532.1	100038347	Auh	transcript	77.6951	75.6235	0.0389891	0.000481253	0.0178948
mmu-let-7f-1-3p	16.3024	2.89496	2.0064	0.00039604	0.0053882	NM_080708.1	140780	Auh	transcript	3.11057	1.31645	1.24053	0.000700149	0.0216299
mmu-let-7f-1-3p	16.3024	2.89496	2.0064	0.00039604	0.0053882	NM_138651.7	110911	Auh	transcript	29.7644	31.9439	-0.101955	0.00102009	0.0269116
mmu-let-7f-1-3p	16.3024	2.89496	2.0064	0.00039604	0.0053882	NM_001286641.1	330941	Auh	transcript	0	2.28586	#NAME?	8.04807e-05	0.011849
mmu-let-7f-1-3p	16.3024	2.89496	2.0064	0.00039604	0.0053882	NM_133218.2	170753	Auh	transcript	4.21261	7.10953	-0.755041	0.00042631	0.0168243
mmu-let-7f-1-3p	16.3024	2.89496	2.0064	0.00039604	0.0053882	NM_019771.2	56431	Auh	transcript	25.9171	78.1587	-1.5925	0.000176231	0.011849
mmu-let-7f-1-3p	16.3024	2.89496	2.0064	0.00039604	0.0053882	NM_023434.3	268741	Auh	transcript	8.76242	4.26688	1.03815	5.78462e-05	0.011849
mmu-let-7f-1-3p	16.3024	2.89496	2.0064	0.00039604	0.0053882	TCONS_00016650	13681	Auh	transcript	0.356588	12.2909	-5.10719	6.66118e-05	0.011849
mmu-let-7f-1-3p	16.3024	2.89496	2.0064	0.00039604	0.0053882	NM_145991.2	214498	Auh	transcript	0.353721	3.55633	-3.32971	0.000125934	0.011849
mmu-let-7f-1-3p	16.3024	2.89496	2.0064	0.00039604	0.0053882	NM_172546.2	215748	Auh	transcript	6.00892	10.7471	-0.838771	0.00240561	0.0424412
mmu-let-7f-1-3p	16.3024	2.89496	2.0064	0.00039604	0.0053882	NM_010865.3	17926	Auh	transcript	1.44807	4.62467	-1.67522	0.000256376	0.0126996
mmu-let-7f-1-3p	16.3024	2.89496	2.0064	0.00039604	0.0053882	NM_001081236.1	76792	Auh	transcript	8.82049	3.09024	1.51314	0.00010701	0.011849
mmu-let-7f-1-3p	16.3024	2.89496	2.0064	0.00039604	0.0053882	NM_172513.3	213056	Auh	transcript	2.78856	1.04984	1.40935	0.00125155	0.0297996
mmu-let-7f-1-3p	16.3024	2.89496	2.0064	0.00039604	0.0053882	NM_175094.5	27402	Auh	transcript	50.5672	27.8015	0.863037	8.97126e-05	0.011849
mmu-let-7f-1-3p	16.3024	2.89496	2.0064	0.00039604	0.0053882	NM_009031.3	245688	Auh	transcript	41.2654	45.1654	-0.130286	0.00188478	0.0369923
mmu-let-7f-1-3p	16.3024	2.89496	2.0064	0.00039604	0.0053882	XM_030252339.2	102634333	Auh	transcript	0	17.8796	#NAME?	2.71143e-06	0.00681592
mmu-let-7f-1-3p	16.3024	2.89496	2.0064	0.00039604	0.0053882	XM_006500766.4	18415	Auh	transcript	4.38991	2.19873	0.997525	0.00152571	0.0331249
mmu-miR-410-3p	4.51549	20.1093	-1.797	0.0003202	0.004869	NM_008467.4	16649	Auh	transcript	40.2608	22.3532	0.848894	0.00138369	0.0314147
mmu-miR-410-3p	4.51549	20.1093	-1.797	0.0003202	0.004869	NM_175036.4	230514	B4galt6	transcript	9.35461	10.555	-0.174176	0.000232174	0.0120484
mmu-miR-410-3p	4.51549	20.1093	-1.797	0.0003202	0.004869	TCONS_00024215	353211	B4galt6	transcript	3.50495	1.28129	1.45179	0.00236797	0.0420917
mmu-miR-410-3p	4.51549	20.1093	-1.797	0.0003202	0.004869	TCONS_00012867	214897	B4galt6	transcript	0	0.820922	#NAME?	0.000208101	0.011849
mmu-miR-410-3p	4.51549	20.1093	-1.797	0.0003202	0.004869	NM_010771.6	17184	B4galt6	transcript	26.9851	29.161	-0.111874	0.000439264	0.0170029
mmu-miR-410-3p	4.51549	20.1093	-1.797	0.0003202	0.004869	XM_036163391.1	76295	B4galt6	transcript	0.0414963	1.4673	-5.14403	0.000301881	0.0138406
mmu-miR-410-3p	4.51549	20.1093	-1.797	0.0003202	0.004869	NM_009433.3	22110	B4galt6	transcript	32.3123	27.2293	0.246923	0.000539287	0.0191482
mmu-miR-410-3p	4.51549	20.1093	-1.797	0.0003202	0.004869	NM_197990.3	69399	B4galt6	transcript	3.74703	6.52172	-0.799504	0.00161143	0.0338712
mmu-miR-410-3p	4.51549	20.1093	-1.797	0.0003202	0.004869	TCONS_00023188	20541	B4galt6	transcript	20.6975	50.4304	-1.28484	0.00253048	0.0436594
mmu-miR-410-3p	4.51549	20.1093	-1.797	0.0003202	0.004869	NM_001359858.1	66923	B4galt6	transcript	0	1.00614	#NAME?	0.000208101	0.011849
mmu-miR-410-3p	4.51549	20.1093	-1.797	0.0003202	0.004869	NM_018779.2	54611	B4galt6	transcript	9.7464	25.8013	-1.4045	0.000703119	0.0216341
mmu-miR-410-3p	4.51549	20.1093	-1.797	0.0003202	0.004869	NM_194054.3	68585	B4galt6	transcript	9.3627	19.3943	-1.05064	3.22486e-05	0.0109036
mmu-miR-410-3p	4.51549	20.1093	-1.797	0.0003202	0.004869	XM_011238527.4	269198	B4galt6	transcript	0.130446	1.37408	-3.39694	0.00227693	0.041197
mmu-miR-410-3p	4.51549	20.1093	-1.797	0.0003202	0.004869	XM_036157326.1	217708	B4galt6	transcript	0.00898367	1.99876	-7.79759	0.00209559	0.039337
mmu-miR-410-3p	4.51549	20.1093	-1.797	0.0003202	0.004869	NM_008772.5	18441	B4galt6	transcript	6.72246	2.87961	1.22312	2.8552e-05	0.0109036
mmu-miR-410-3p	4.51549	20.1093	-1.797	0.0003202	0.004869	NM_145991.2	214498	Bcam	transcript	0.353721	3.55633	-3.32971	0.000125934	0.011849
mmu-miR-410-3p	4.51549	20.1093	-1.797	0.0003202	0.004869	NM_001359172.1	20817	Bcam	transcript	0.0243827	1.83794	-6.23609	0.00101558	0.0268837
mmu-miR-410-3p	4.51549	20.1093	-1.797	0.0003202	0.004869	NM_133218.2	170753	Bcam	transcript	4.21261	7.10953	-0.755041	0.00042631	0.0168243
mmu-miR-410-3p	4.51549	20.1093	-1.797	0.0003202	0.004869	TCONS_00001310	12628	Bcam	transcript	0.104025	5.00249	-5.58765	3.08487e-05	0.0109036
mmu-miR-410-3p	4.51549	20.1093	-1.797	0.0003202	0.004869	TCONS_00018911	238673	Bcam	transcript	0	0.820108	#NAME?	0.000208101	0.011849
mmu-miR-410-3p	4.51549	20.1093	-1.797	0.0003202	0.004869	NM_001033228.3	109700	Bcam	transcript	18.5636	8.06813	1.20217	0.00297749	0.047773
mmu-miR-410-3p	4.51549	20.1093	-1.797	0.0003202	0.004869	TCONS_00011942	22335	Bcat2	transcript	0.0926427	20.734	-7.80611	0.00018892	0.011849
mmu-miR-410-3p	4.51549	20.1093	-1.797	0.0003202	0.004869	NM_001286641.1	330941	Bckdha	transcript	0	2.28586	#NAME?	8.04807e-05	0.011849
mmu-miR-410-3p	4.51549	20.1093	-1.797	0.0003202	0.004869	NM_144545.4	78655	Bckdha	transcript	20.27	12.1274	0.741077	0.000310056	0.0139803
mmu-miR-410-3p	4.51549	20.1093	-1.797	0.0003202	0.004869	NM_080708.1	140780	Bcl6	transcript	3.11057	1.31645	1.24053	0.000700149	0.0216299
mmu-miR-410-3p	4.51549	20.1093	-1.797	0.0003202	0.004869	XM_006511156.2	24127	Bcl6	transcript	0	1.84218	#NAME?	0.000225398	0.0120256
mmu-miR-410-3p	4.51549	20.1093	-1.797	0.0003202	0.004869	NM_028105.4	72113	Bcl6	transcript	3.00601	0.750733	2.00148	0.00286836	0.0468157
mmu-miR-410-3p	4.51549	20.1093	-1.797	0.0003202	0.004869	NM_024448.2	19328	Bcl6	transcript	69.553	39.0894	0.831336	0.0011958	0.0291166
mmu-miR-410-3p	4.51549	20.1093	-1.797	0.0003202	0.004869	NM_001164580.1	233812	Bcl6	transcript	3.49234	4.10635	-0.233664	0.000328963	0.0144734
mmu-miR-410-3p	4.51549	20.1093	-1.797	0.0003202	0.004869	NM_172513.3	213056	Bcl9l	transcript	2.78856	1.04984	1.40935	0.00125155	0.0297996
mmu-miR-410-3p	4.51549	20.1093	-1.797	0.0003202	0.004869	NM_026095.4	67332	Bcl9l	transcript	19.2542	19.8437	-0.0435094	0.000206079	0.011849
mmu-miR-410-3p	4.51549	20.1093	-1.797	0.0003202	0.004869	XM_006507189.4	109264	Bcl9l	transcript	12.3611	5.99776	1.04331	1.94183e-05	0.00898899
mmu-miR-1843a-5p	810.26	431.36	0.87985	0.00037879	0.0052929	NM_178793.4	320924	Bcl9l	transcript	4.66364	1.19089	1.96941	0.00195321	0.0377505
mmu-miR-1843a-5p	810.26	431.36	0.87985	0.00037879	0.0052929	NM_001081242.2	70549	Bcl9l	transcript	0.0245157	2.63951	-6.75042	0.000142942	0.011849
mmu-miR-1843a-5p	810.26	431.36	0.87985	0.00037879	0.0052929	NM_007993.2	14118	Bcl9l	transcript	9.39705	12.5364	-0.415847	0.00224878	0.0407919
mmu-miR-1843a-5p	810.26	431.36	0.87985	0.00037879	0.0052929	NM_008131.4	14645	Bcl9l	transcript	137.636	222.354	-0.691997	0.00181856	0.0363209
mmu-miR-1843a-5p	810.26	431.36	0.87985	0.00037879	0.0052929	NM_001164172.1	26400	Bcl9l	transcript	12.2356	10.1167	0.274339	0.00107807	0.0276308
mmu-miR-1843a-5p	810.26	431.36	0.87985	0.00037879	0.0052929	NM_133783.2	96979	Bcl9l	transcript	22.0215	10.3181	1.09373	0.0006923	0.0214613
mmu-miR-1843a-5p	810.26	431.36	0.87985	0.00037879	0.0052929	NM_009378.3	21824	Bcl9l	transcript	25.7737	12.0985	1.09108	0.000318394	0.0142293
mmu-miR-1843a-5p	810.26	431.36	0.87985	0.00037879	0.0052929	NM_029182.1	75141	Bcl9l	transcript	0.912002	5.28095	-2.53369	0.000206413	0.011849
mmu-miR-1843a-5p	810.26	431.36	0.87985	0.00037879	0.0052929	NM_001291835.1	11655	Bcl9l	transcript	0.0961463	1.86164	-4.2752	0.00071895	0.0218102
mmu-miR-1843a-5p	810.26	431.36	0.87985	0.00037879	0.0052929	NM_001253843.1	28000	Bex1	transcript	5.91357	8.65074	-0.548794	0.00248757	0.043257
mmu-miR-1843a-5p	810.26	431.36	0.87985	0.00037879	0.0052929	TCONS_00016218	18016	Bex1	transcript	0	3.89182	#NAME?	0.000208101	0.011849
mmu-miR-1843a-5p	810.26	431.36	0.87985	0.00037879	0.0052929	NM_013845.5	26563	Bloc1s1	transcript	1.47389	3.10351	-1.07427	0.000574774	0.0198218
mmu-miR-1843a-5p	810.26	431.36	0.87985	0.00037879	0.0052929	NM_030225.4	78920	Bloc1s1	transcript	181.845	108.705	0.742289	0.0025797	0.043979
mmu-miR-1843a-5p	810.26	431.36	0.87985	0.00037879	0.0052929	TCONS_00012919	17999	Bloc1s1	transcript	121.808	126.953	-0.0596877	0.000984095	0.0263548
mmu-miR-1843a-5p	810.26	431.36	0.87985	0.00037879	0.0052929	NM_153564.2	229898	Bloc1s1	transcript	6.16046	1.3243	2.2178	0.00167029	0.034344
mmu-miR-1843a-5p	810.26	431.36	0.87985	0.00037879	0.0052929	XM_030243724.1	80914	Bmp2k	transcript	0.0461117	2.38203	-5.69092	6.62482e-05	0.011849
mmu-miR-1843a-5p	810.26	431.36	0.87985	0.00037879	0.0052929	NM_001127346.1	75597	Bmp2k	transcript	1.89839	6.35692	-1.74355	0.000426338	0.0168243
mmu-miR-1843a-5p	810.26	431.36	0.87985	0.00037879	0.0052929	NM_172546.2	215748	Bmp2k	transcript	6.00892	10.7471	-0.838771	0.00240561	0.0424412
mmu-miR-1843a-5p	810.26	431.36	0.87985	0.00037879	0.0052929	NM_023434.3	268741	Bmp2k	transcript	8.76242	4.26688	1.03815	5.78462e-05	0.011849
mmu-miR-1843a-5p	810.26	431.36	0.87985	0.00037879	0.0052929	NM_026273.2	67609	Bmp2k	transcript	15.441	7.97298	0.953576	0.00198299	0.0379124
mmu-miR-1843a-5p	810.26	431.36	0.87985	0.00037879	0.0052929	TCONS_00018911	238673	Bmp2k	transcript	0	0.820108	#NAME?	0.000208101	0.011849
mmu-miR-1843a-5p	810.26	431.36	0.87985	0.00037879	0.0052929	NM_133985.2	108737	Bmp2k	transcript	1.89358	7.15914	-1.91867	0.00178092	0.0357724
mmu-miR-1843a-5p	810.26	431.36	0.87985	0.00037879	0.0052929	NM_001358359.1	223649	Bmp2k	transcript	4.18914	9.13984	-1.12551	0.00260867	0.0441014
mmu-miR-1843a-5p	810.26	431.36	0.87985	0.00037879	0.0052929	NM_001162532.1	100038347	Bmp2k	transcript	77.6951	75.6235	0.0389891	0.000481253	0.0178948
mmu-miR-1843a-5p	810.26	431.36	0.87985	0.00037879	0.0052929	XM_006511156.2	24127	Bmp2k	transcript	0	1.84218	#NAME?	0.000225398	0.0120256
mmu-miR-1843a-5p	810.26	431.36	0.87985	0.00037879	0.0052929	NM_016709.2	11992	Bmp2k	transcript	41.6289	23.1108	0.849015	0.00102481	0.0269859
mmu-miR-1843a-5p	810.26	431.36	0.87985	0.00037879	0.0052929	NM_008444.4	16569	Bmp2k	transcript	3.70473	1.55262	1.25466	0.000617896	0.0200774
mmu-miR-1843a-5p	810.26	431.36	0.87985	0.00037879	0.0052929	NM_001037859.2	12978	Bmp2k	transcript	16.1218	5.74739	1.48803	0.00326079	0.0499953
mmu-miR-1843a-5p	810.26	431.36	0.87985	0.00037879	0.0052929	TCONS_00005936	242474	Bmp2k	transcript	1.57062	2.8449	-0.857041	0.000608684	0.0199437
mmu-miR-1843a-5p	810.26	431.36	0.87985	0.00037879	0.0052929	NM_029436.3	75785	Bmp2k	transcript	0.247428	12.2514	-5.6298	1.70221e-05	0.00898899
mmu-miR-1843a-5p	810.26	431.36	0.87985	0.00037879	0.0052929	NM_181328.3	214663	Bmp2k	transcript	5.28174	1.29638	2.02652	0.00193551	0.0375621
mmu-miR-1843a-5p	810.26	431.36	0.87985	0.00037879	0.0052929	TCONS_00025673	20603	Bmp2k	transcript	0	0.904215	#NAME?	0.000208101	0.011849
mmu-miR-1843a-5p	810.26	431.36	0.87985	0.00037879	0.0052929	NM_009949.2	12896	Bmp2k	transcript	79.2415	30.2343	1.39007	0.00197312	0.0378257
mmu-miR-1843a-5p	810.26	431.36	0.87985	0.00037879	0.0052929	NM_026504.2	52064	Bmp2k	transcript	48.198	26.3683	0.870167	0.000925437	0.025695
mmu-miR-1843a-5p	810.26	431.36	0.87985	0.00037879	0.0052929	TCONS_00020946	78929	Bmp2k	transcript	28.6124	16.9856	0.752328	0.00258292	0.0439811
mmu-miR-1843a-5p	810.26	431.36	0.87985	0.00037879	0.0052929	XM_036155254.1	69632	Bmp2k	transcript	4.65604	2.21758	1.07012	6.94014e-06	0.00809735
mmu-miR-1843a-5p	810.26	431.36	0.87985	0.00037879	0.0052929	NM_026518.4	68031	Brd4	transcript	0.33629	1.86842	-2.47404	0.00023034	0.0120256
mmu-miR-1843a-5p	810.26	431.36	0.87985	0.00037879	0.0052929	NM_001374656.1	330938	Brd4	transcript	0.09835	4.32228	-5.45772	0.000928627	0.025695
mmu-miR-1843a-5p	810.26	431.36	0.87985	0.00037879	0.0052929	NM_023824.3	76498	Brd4	transcript	11.489	5.29525	1.11749	0.00313365	0.049005
mmu-miR-1843a-5p	810.26	431.36	0.87985	0.00037879	0.0052929	NM_001364412.1	102093	Brd4	transcript	22.1699	10.0295	1.14436	0.000895407	0.0252694
mmu-miR-1843a-5p	810.26	431.36	0.87985	0.00037879	0.0052929	XM_006522654.4	74143	Brd4	transcript	0.437384	6.77251	-3.95272	0.000882794	0.0249632
mmu-miR-1843a-5p	810.26	431.36	0.87985	0.00037879	0.0052929	NM_078477.2	118445	Brd4	transcript	1.14929	2.82258	-1.29627	0.0032587	0.0499953
mmu-miR-1843a-5p	810.26	431.36	0.87985	0.00037879	0.0052929	NM_178651.4	109108	Brd4	transcript	44.0714	20.9427	1.07339	0.00170536	0.0348627
mmu-miR-1843a-5p	810.26	431.36	0.87985	0.00037879	0.0052929	NM_019389.2	13003	Brd4	transcript	2.31924	3.05164	-0.395936	0.00210026	0.0393487
mmu-miR-1843a-5p	810.26	431.36	0.87985	0.00037879	0.0052929	XM_030243769.1	93691	Brd4	transcript	0.003252	2.77016	-9.73443	0.0006671	0.0210018
mmu-miR-1843a-5p	810.26	431.36	0.87985	0.00037879	0.0052929	NM_025788.3	66830	Brd4	transcript	10.8813	6.39523	0.766786	0.000381223	0.0160261
mmu-miR-1843a-5p	810.26	431.36	0.87985	0.00037879	0.0052929	TCONS_00012709	80288	Brd4	transcript	0.156424	1.94385	-3.63538	0.000218389	0.0119919
mmu-miR-1843a-5p	810.26	431.36	0.87985	0.00037879	0.0052929	NM_001359858.1	66923	Brd4	transcript	0	1.00614	#NAME?	0.000208101	0.011849
mmu-miR-1843a-5p	810.26	431.36	0.87985	0.00037879	0.0052929	NM_020496.3	57246	Brd4	transcript	0.561424	1.58799	-1.50004	0.000600662	0.0199437
mmu-miR-1843a-5p	810.26	431.36	0.87985	0.00037879	0.0052929	NM_019794.5	56445	Brd4	transcript	75.2704	44.6041	0.754907	0.00135052	0.0310599
mmu-miR-1843a-5p	810.26	431.36	0.87985	0.00037879	0.0052929	XM_011245735.2	71919	Brd4	transcript	0.0662103	1.75448	-4.72784	0.000969008	0.0262404
mmu-miR-1843a-5p	810.26	431.36	0.87985	0.00037879	0.0052929	NM_133218.2	170753	Brd4	transcript	4.21261	7.10953	-0.755041	0.00042631	0.0168243
mmu-miR-1843a-5p	810.26	431.36	0.87985	0.00037879	0.0052929	TCONS_00001032	21961	Bsg	transcript	45.687	0.543971	6.39211	0.000464811	0.017514
mmu-miR-1843a-5p	810.26	431.36	0.87985	0.00037879	0.0052929	NM_027756.5	71306	Bsg	transcript	5.56108	1.24104	2.16381	0.000430438	0.016892
mmu-miR-1843a-5p	810.26	431.36	0.87985	0.00037879	0.0052929	NM_001013390.3	399548	Bsg	transcript	45.134	2.15251	4.39012	0.000262235	0.0127318
mmu-miR-1843a-5p	810.26	431.36	0.87985	0.00037879	0.0052929	NM_019755.5	18824	Bsg	transcript	9.60038	16.768	-0.804549	0.00157013	0.0335072
mmu-miR-1843a-5p	810.26	431.36	0.87985	0.00037879	0.0052929	NM_183179.1	240595	Bsg	transcript	3.68252	0.490782	2.90754	0.00268645	0.0449153
mmu-miR-1843a-5p	810.26	431.36	0.87985	0.00037879	0.0052929	NM_026792.3	52123	Bsg	transcript	6.0244	3.29056	0.872483	0.0020744	0.039184
mmu-miR-1843a-5p	810.26	431.36	0.87985	0.00037879	0.0052929	NM_001081236.1	76792	Bud31	transcript	8.82049	3.09024	1.51314	0.00010701	0.011849
mmu-miR-1843a-5p	810.26	431.36	0.87985	0.00037879	0.0052929	XM_006507189.4	109264	Bud31	transcript	12.3611	5.99776	1.04331	1.94183e-05	0.00898899
mmu-miR-1843a-5p	810.26	431.36	0.87985	0.00037879	0.0052929	NM_053009.3	109910	C1qb	transcript	33.71	24.0255	0.48861	0.00022276	0.0120256
mmu-miR-1843a-5p	810.26	431.36	0.87985	0.00037879	0.0052929	NM_133719.2	70083	C3ar1	transcript	21.7912	2.29562	3.24679	0.00112883	0.0281926
mmu-miR-1843a-5p	810.26	431.36	0.87985	0.00037879	0.0052929	NM_001039512.1	117198	C3ar1	transcript	0	5.9554	#NAME?	0.000208101	0.011849
mmu-miR-1843a-5p	810.26	431.36	0.87985	0.00037879	0.0052929	NM_001012477.2	20315	C3ar1	transcript	41.9226	8.72303	2.26483	0.00250906	0.0434547
mmu-miR-1843a-5p	810.26	431.36	0.87985	0.00037879	0.0052929	NM_001355124.1	73724	C3ar1	transcript	2.59136	6.75213	-1.38163	0.00321014	0.0495881
mmu-miR-1843a-5p	810.26	431.36	0.87985	0.00037879	0.0052929	XM_006522740.5	78408	C3ar1	transcript	0.427643	2.84562	-2.73427	0.000198822	0.011849
mmu-miR-1843a-5p	810.26	431.36	0.87985	0.00037879	0.0052929	NM_001360789.1	232989	C3ar1	transcript	3.33333e-07	2.02566	-22.5349	0.000208104	0.011849
mmu-miR-1843a-5p	810.26	431.36	0.87985	0.00037879	0.0052929	NM_001167860.2	330319	C3ar1	transcript	5.83695	2.65031	1.13905	0.000584908	0.0198239
mmu-miR-1843a-5p	810.26	431.36	0.87985	0.00037879	0.0052929	NM_025440.3	66242	C3ar1	transcript	33.3094	20.353	0.710686	0.00222944	0.0407016
mmu-miR-1843a-5p	810.26	431.36	0.87985	0.00037879	0.0052929	NM_199029.2	380912	C3ar1	transcript	0.873976	4.10068	-2.2302	8.95514e-05	0.011849
mmu-miR-1843a-5p	810.26	431.36	0.87985	0.00037879	0.0052929	NM_026751.1	68515	C3ar1	transcript	26.963	11.6536	1.2102	0.00114006	0.0283763
mmu-miR-1843a-5p	810.26	431.36	0.87985	0.00037879	0.0052929	TCONS_00010647	20927	Cacna2d1	transcript	0.656619	2.44528	-1.89687	0.00205183	0.0388094
mmu-miR-1843a-5p	810.26	431.36	0.87985	0.00037879	0.0052929	XM_006516544.4	140580	Cacna2d1	transcript	0	0.964251	#NAME?	0.000208101	0.011849
mmu-miR-1843a-5p	810.26	431.36	0.87985	0.00037879	0.0052929	NM_033322.3	93730	Cacna2d1	transcript	0.252209	1.35882	-2.42966	0.000922965	0.0256889
mmu-miR-1843a-5p	810.26	431.36	0.87985	0.00037879	0.0052929	NM_198006.4	76178	Cacna2d1	transcript	50.2161	22.0338	1.18843	0.00112898	0.0281926
mmu-miR-1843a-5p	810.26	431.36	0.87985	0.00037879	0.0052929	NM_183358.4	102060	Cacna2d1	transcript	11.8925	9.82021	0.276231	0.000123986	0.011849
mmu-miR-1843a-5p	810.26	431.36	0.87985	0.00037879	0.0052929	XM_036165926.1	18575	Cacna2d1	transcript	0.00292067	2.25441	-9.59223	0.000224915	0.0120256
mmu-miR-1843a-5p	810.26	431.36	0.87985	0.00037879	0.0052929	NM_173753.4	216742	Cacna2d1	transcript	0.672583	6.5177	-3.27658	0.000648488	0.0206452
mmu-miR-1843a-5p	810.26	431.36	0.87985	0.00037879	0.0052929	TCONS_00020940	57259	Cacna2d1	transcript	0	4.26412	#NAME?	0.000208101	0.011849
mmu-miR-1843a-5p	810.26	431.36	0.87985	0.00037879	0.0052929	NM_178045.4	213391	Cacna2d1	transcript	2.94432	0.459439	2.67999	0.00253891	0.0436594
mmu-miR-1843a-5p	810.26	431.36	0.87985	0.00037879	0.0052929	XM_030250848.1	228998	Cacna2d1	transcript	0	1.08784	#NAME?	0.000208101	0.011849
mmu-miR-1843a-5p	810.26	431.36	0.87985	0.00037879	0.0052929	NM_027402.4	384061	Cacna2d1	transcript	93.0837	43.0236	1.1134	1.16982e-05	0.00898899
mmu-miR-1843a-5p	810.26	431.36	0.87985	0.00037879	0.0052929	NM_001008791.2	73750	Cacna2d1	transcript	6.35529	1.17491	2.43541	0.000189827	0.011849
mmu-miR-1843a-5p	810.26	431.36	0.87985	0.00037879	0.0052929	NM_178111.3	68728	Cacna2d1	transcript	181.985	73.8032	1.30206	0.000781812	0.0231852
mmu-miR-1843a-5p	810.26	431.36	0.87985	0.00037879	0.0052929	NM_010324.2	14718	Cacna2d1	transcript	326.78	192.111	0.766377	0.000672183	0.0210682
mmu-miR-1843a-5p	810.26	431.36	0.87985	0.00037879	0.0052929	XM_036162750.1	99031	Cacna2d1	transcript	4.28989	0.538524	2.99386	0.000131777	0.011849
mmu-miR-1843a-5p	810.26	431.36	0.87985	0.00037879	0.0052929	NM_009634.6	11564	Cacna2d1	transcript	13.9019	8.39214	0.728171	0.00112715	0.0281926
mmu-miR-1843a-5p	810.26	431.36	0.87985	0.00037879	0.0052929	NM_023505.2	69367	Cacna2d1	transcript	0	0.920794	#NAME?	0.000208101	0.011849
mmu-miR-1843a-5p	810.26	431.36	0.87985	0.00037879	0.0052929	NM_011782.2	23794	Cacna2d1	transcript	7.2282	4.15903	0.79739	0.0015713	0.0335072
mmu-miR-1843a-5p	810.26	431.36	0.87985	0.00037879	0.0052929	NM_001361966.1	73998	Cacna2d1	transcript	3.55004	1.71795	1.04715	0.00105024	0.027401
mmu-miR-1843a-5p	810.26	431.36	0.87985	0.00037879	0.0052929	NM_172513.3	213056	Cacna2d1	transcript	2.78856	1.04984	1.40935	0.00125155	0.0297996
mmu-miR-1843a-5p	810.26	431.36	0.87985	0.00037879	0.0052929	NM_145447.2	217721	Cacna2d1	transcript	0.565025	2.72949	-2.27225	0.000769372	0.0228985
mmu-miR-1843a-5p	810.26	431.36	0.87985	0.00037879	0.0052929	NM_001361568.1	276952	Calcoco1	transcript	26.0065	13.8672	0.907191	0.0027091	0.0450388
mmu-miR-1843a-5p	810.26	431.36	0.87985	0.00037879	0.0052929	NM_029153.1	107767	Calcoco1	transcript	9.3401	10.3936	-0.15419	0.000209932	0.011849
mmu-miR-1843a-5p	810.26	431.36	0.87985	0.00037879	0.0052929	XM_006505871.4	21366	Calcoco1	transcript	0	11.8486	#NAME?	0.000348779	0.0150187
mmu-miR-1843a-5p	810.26	431.36	0.87985	0.00037879	0.0052929	NM_001355651.1	74182	Calcoco1	transcript	0.196427	1.98661	-3.33825	3.46341e-05	0.0109036
mmu-miR-1843a-5p	810.26	431.36	0.87985	0.00037879	0.0052929	NM_008617.2	17448	Calcoco1	transcript	542.541	345.903	0.649364	0.000236176	0.012135
mmu-miR-1843a-5p	810.26	431.36	0.87985	0.00037879	0.0052929	XM_030248280.2	11512	Calcoco1	transcript	0.0235687	1.77038	-6.23104	0.000785551	0.0231852
mmu-miR-1843a-5p	810.26	431.36	0.87985	0.00037879	0.0052929	NM_009565.5	22724	Calcoco1	transcript	4.12497	2.16341	0.931079	0.00148296	0.0328266
mmu-miR-1843a-5p	810.26	431.36	0.87985	0.00037879	0.0052929	NM_001372425.1	234593	Calcoco1	transcript	0	1.53412	#NAME?	8.94309e-05	0.011849
mmu-miR-1843a-5p	810.26	431.36	0.87985	0.00037879	0.0052929	NM_001110843.1	12293	Calcoco1	transcript	5.55837	0	Inf	9.14502e-06	0.00809735
mmu-miR-1843a-5p	810.26	431.36	0.87985	0.00037879	0.0052929	NM_001033634.3	414872	Calcoco1	transcript	24.65	7.93958	1.63445	0.00064772	0.0206452
mmu-miR-1843a-5p	810.26	431.36	0.87985	0.00037879	0.0052929	TCONS_00018645	238505	Calcoco1	transcript	31.0669	4.54431	2.77324	0.000120377	0.011849
mmu-miR-1843a-5p	810.26	431.36	0.87985	0.00037879	0.0052929	TCONS_00012867	214897	Camsap1	transcript	0	0.820922	#NAME?	0.000208101	0.011849
mmu-miR-1843a-5p	810.26	431.36	0.87985	0.00037879	0.0052929	NM_001013786.3	432731	Camsap1	transcript	0	1.47175	#NAME?	0.000843935	0.0243504
mmu-miR-1843a-5p	810.26	431.36	0.87985	0.00037879	0.0052929	TCONS_00000513	21952	Camsap1	transcript	0	2.94671	#NAME?	0.00241972	0.042621
mmu-miR-1843a-5p	810.26	431.36	0.87985	0.00037879	0.0052929	NM_001370902.1	665700	Camsap1	transcript	7.60778	1.38907	2.45336	3.91995e-05	0.0115968
mmu-miR-1843a-5p	810.26	431.36	0.87985	0.00037879	0.0052929	TCONS_00022683	68799	Camsap1	transcript	4.5466	0.272189	4.06211	0.0015752	0.0335072
mmu-miR-1843a-5p	810.26	431.36	0.87985	0.00037879	0.0052929	TCONS_00008925	14548	Camsap1	transcript	0.408359	3.95577	-3.27605	0.00108086	0.0276399
mmu-miR-1843a-5p	810.26	431.36	0.87985	0.00037879	0.0052929	XM_036163810.1	18027	Camsap1	transcript	0	1.75944	#NAME?	0.00117499	0.0288995
mmu-miR-1843a-5p	810.26	431.36	0.87985	0.00037879	0.0052929	NM_018779.2	54611	Camsap1	transcript	9.7464	25.8013	-1.4045	0.000703119	0.0216341
mmu-miR-1843a-5p	810.26	431.36	0.87985	0.00037879	0.0052929	XM_011238527.4	269198	Camsap1	transcript	0.130446	1.37408	-3.39694	0.00227693	0.041197
mmu-miR-1843a-5p	810.26	431.36	0.87985	0.00037879	0.0052929	NM_029665.4	76582	Camsap1	transcript	7.29821	4.40754	0.727569	0.000227082	0.0120256
mmu-miR-1843a-5p	810.26	431.36	0.87985	0.00037879	0.0052929	NM_011716.2	22393	Camsap1	transcript	33.705	11.8491	1.50819	0.000749011	0.0225226
mmu-miR-1843a-5p	810.26	431.36	0.87985	0.00037879	0.0052929	TCONS_00002486	68295	Camsap1	transcript	0	1.18122	#NAME?	0.000208101	0.011849
mmu-miR-1843a-5p	810.26	431.36	0.87985	0.00037879	0.0052929	XM_036161518.1	22359	Camsap1	transcript	43.687	2.02854	4.42869	3.29608e-05	0.0109036
mmu-miR-1843a-5p	810.26	431.36	0.87985	0.00037879	0.0052929	NM_145991.2	214498	Camsap1	transcript	0.353721	3.55633	-3.32971	0.000125934	0.011849
mmu-miR-1843a-5p	810.26	431.36	0.87985	0.00037879	0.0052929	NM_009088.3	20019	Camsap1	transcript	11.1603	5.17423	1.10897	4.63453e-05	0.011849
mmu-miR-1843a-5p	810.26	431.36	0.87985	0.00037879	0.0052929	NM_009382.3	21838	Camsap1	transcript	4.00042	1.18713	1.75268	0.00193232	0.0375518
mmu-miR-1843a-5p	810.26	431.36	0.87985	0.00037879	0.0052929	TCONS_00001279	226432	Camsap1	transcript	5.41465	0.03601	7.23233	0.00192567	0.0375518
mmu-miR-1843a-5p	810.26	431.36	0.87985	0.00037879	0.0052929	NM_026742.4	68493	Camsap1	transcript	19.9983	10.1295	0.981313	0.00129411	0.0301541
mmu-miR-1843a-5p	810.26	431.36	0.87985	0.00037879	0.0052929	NM_181325.4	18408	Camsap1	transcript	4.43938	1.20821	1.87748	0.00066888	0.0210111
mmu-miR-1843a-5p	810.26	431.36	0.87985	0.00037879	0.0052929	XM_006534391.5	75580	Camsap1	transcript	0	1.27003	#NAME?	0.000208101	0.011849
mmu-miR-1843a-5p	810.26	431.36	0.87985	0.00037879	0.0052929	NM_001109910.1	83701	Camsap1	transcript	2.51714	0.241925	3.37916	5.09413e-05	0.011849
mmu-miR-1843a-5p	810.26	431.36	0.87985	0.00037879	0.0052929	NM_138585.3	27967	Camsap1	transcript	4.17872	3.27645	0.35093	0.00119885	0.0291322
mmu-miR-1843a-5p	810.26	431.36	0.87985	0.00037879	0.0052929	NM_026605.2	68188	Camsap1	transcript	0.084507	14.8845	-7.46053	5.32149e-05	0.011849
mmu-miR-1843a-5p	810.26	431.36	0.87985	0.00037879	0.0052929	XM_006518778.1	211922	Camsap1	transcript	0.021746	0.97065	-5.48013	0.00024897	0.0125076
mmu-miR-1843a-5p	810.26	431.36	0.87985	0.00037879	0.0052929	TCONS_00016863	76626	Camsap1	transcript	0	1.46752	#NAME?	0.000208101	0.011849
mmu-miR-1843a-5p	810.26	431.36	0.87985	0.00037879	0.0052929	NM_025522.5	66375	Capn2	transcript	12.6595	4.94915	1.35497	0.000211927	0.0119058
mmu-miR-1843a-5p	810.26	431.36	0.87985	0.00037879	0.0052929	TCONS_00001759	140858	Capn2	transcript	0	1.07967	#NAME?	0.000208101	0.011849
mmu-miR-1843a-5p	810.26	431.36	0.87985	0.00037879	0.0052929	TCONS_00009768	78286	Cars2	transcript	5.80375	0.092506	5.9713	0.000875541	0.0248661
mmu-miR-1843a-5p	810.26	431.36	0.87985	0.00037879	0.0052929	NM_025454.2	66262	Cars2	transcript	2.38478	4.37866	-0.876636	0.000978861	0.0262643
mmu-miR-1983	105.935	21.8472	2.0109	2.9055e-07	1.5022e-05	NM_178045.4	213391	Cars2	transcript	2.94432	0.459439	2.67999	0.00253891	0.0436594
mmu-miR-1983	105.935	21.8472	2.0109	2.9055e-07	1.5022e-05	NM_026490.2	56284	Cars2	transcript	5.12255	3.13969	0.70624	0.00202573	0.0385216
mmu-miR-1983	105.935	21.8472	2.0109	2.9055e-07	1.5022e-05	NM_026147.6	67427	Cars2	transcript	5.39695	10.3162	-0.934702	0.000949412	0.0260161
mmu-miR-1983	105.935	21.8472	2.0109	2.9055e-07	1.5022e-05	TCONS_00022839	57261	Cars2	transcript	0.240581	1.86374	-2.9536	0.00196092	0.0378189
mmu-miR-1983	105.935	21.8472	2.0109	2.9055e-07	1.5022e-05	TCONS_00020940	57259	Cars2	transcript	0	4.26412	#NAME?	0.000208101	0.011849
mmu-miR-1983	105.935	21.8472	2.0109	2.9055e-07	1.5022e-05	NM_175212.4	74868	Cars2	transcript	79.645	32.9378	1.27384	0.000764705	0.0228557
mmu-miR-1983	105.935	21.8472	2.0109	2.9055e-07	1.5022e-05	XM_030243724.1	80914	Cars2	transcript	0.0461117	2.38203	-5.69092	6.62482e-05	0.011849
mmu-miR-1983	105.935	21.8472	2.0109	2.9055e-07	1.5022e-05	NM_010217.2	14219	Cbx5	transcript	13.8161	47.3045	-1.77562	0.00230935	0.0414133
mmu-miR-1983	105.935	21.8472	2.0109	2.9055e-07	1.5022e-05	NM_026192.3	67488	Cbx5	transcript	24.0407	36.1119	-0.586996	0.00100726	0.0267227
mmu-miR-1983	105.935	21.8472	2.0109	2.9055e-07	1.5022e-05	NM_011671.5	22228	Cbx5	transcript	22.7224	7.62895	1.57456	0.00309646	0.0487417
mmu-miR-1983	105.935	21.8472	2.0109	2.9055e-07	1.5022e-05	XM_006516544.4	140580	Cbx5	transcript	0	0.964251	#NAME?	0.000208101	0.011849
mmu-miR-1983	105.935	21.8472	2.0109	2.9055e-07	1.5022e-05	TCONS_00015404	72947	Cbx5	transcript	0.112385	1.99484	-4.14975	0.000153106	0.011849
mmu-miR-1983	105.935	21.8472	2.0109	2.9055e-07	1.5022e-05	NM_172338.2	214063	Cbx5	transcript	8.89771	4.23916	1.06965	0.000105129	0.011849
mmu-miR-1983	105.935	21.8472	2.0109	2.9055e-07	1.5022e-05	TCONS_00016218	18016	Cbx5	transcript	0	3.89182	#NAME?	0.000208101	0.011849
mmu-miR-1983	105.935	21.8472	2.0109	2.9055e-07	1.5022e-05	TCONS_00011907	71941	Cbx5	transcript	0.00341133	1.54782	-8.82569	0.000463751	0.017514
mmu-miR-1983	105.935	21.8472	2.0109	2.9055e-07	1.5022e-05	TCONS_00023188	20541	Cbx5	transcript	20.6975	50.4304	-1.28484	0.00253048	0.0436594
mmu-miR-1983	105.935	21.8472	2.0109	2.9055e-07	1.5022e-05	TCONS_00004645	71807	Cbx5	transcript	2.75995	1.1594	1.25126	0.00307992	0.0485894
mmu-miR-1983	105.935	21.8472	2.0109	2.9055e-07	1.5022e-05	NM_025440.3	66242	Cbx5	transcript	33.3094	20.353	0.710686	0.00222944	0.0407016
mmu-miR-1983	105.935	21.8472	2.0109	2.9055e-07	1.5022e-05	NM_001362456.1	16509	Cbx5	transcript	0.083644	4.13095	-5.62607	0.00052909	0.0190728
mmu-miR-1983	105.935	21.8472	2.0109	2.9055e-07	1.5022e-05	NM_001171000.2	74340	Cbx5	transcript	5.19366	5.65173	-0.12194	0.00149626	0.0328408
mmu-miR-1983	105.935	21.8472	2.0109	2.9055e-07	1.5022e-05	NM_133783.2	96979	Cbx5	transcript	22.0215	10.3181	1.09373	0.0006923	0.0214613
mmu-miR-1983	105.935	21.8472	2.0109	2.9055e-07	1.5022e-05	NM_019581.3	56055	Cbx5	transcript	0.704575	3.06818	-2.12256	0.000137375	0.011849
mmu-miR-1983	105.935	21.8472	2.0109	2.9055e-07	1.5022e-05	NM_001310770.1	231889	Cbx5	transcript	0	1.68838	#NAME?	0.000547881	0.0192601
mmu-miR-1983	105.935	21.8472	2.0109	2.9055e-07	1.5022e-05	TCONS_00002983	109129	Cbx5	transcript	0	1.7422	#NAME?	0.000208101	0.011849
mmu-miR-1983	105.935	21.8472	2.0109	2.9055e-07	1.5022e-05	NM_001253843.1	28000	Cbx5	transcript	5.91357	8.65074	-0.548794	0.00248757	0.043257
mmu-miR-1983	105.935	21.8472	2.0109	2.9055e-07	1.5022e-05	NM_172436.4	78830	Cbx5	transcript	67.2218	36.5853	0.877663	0.00153206	0.0331877
mmu-miR-1983	105.935	21.8472	2.0109	2.9055e-07	1.5022e-05	NM_130892.5	170728	Cbx5	transcript	25.5225	13.9311	0.87346	0.00255076	0.0436594
mmu-miR-1983	105.935	21.8472	2.0109	2.9055e-07	1.5022e-05	NM_178793.4	320924	Cbx5	transcript	4.66364	1.19089	1.96941	0.00195321	0.0377505
mmu-miR-1983	105.935	21.8472	2.0109	2.9055e-07	1.5022e-05	NM_001012477.2	20315	Cbx5	transcript	41.9226	8.72303	2.26483	0.00250906	0.0434547
mmu-miR-1983	105.935	21.8472	2.0109	2.9055e-07	1.5022e-05	NM_001142957.1	100043468	Cbx5	transcript	6.14218	3.75226	0.71099	0.00229483	0.0413623
mmu-miR-1983	105.935	21.8472	2.0109	2.9055e-07	1.5022e-05	NM_198703.3	232341	Cbx5	transcript	33.5824	16.562	1.01983	0.000117898	0.011849
mmu-miR-1983	105.935	21.8472	2.0109	2.9055e-07	1.5022e-05	NM_172513.3	213056	Ccbe1	transcript	2.78856	1.04984	1.40935	0.00125155	0.0297996
mmu-miR-1983	105.935	21.8472	2.0109	2.9055e-07	1.5022e-05	NM_001372425.1	234593	Ccbe1	transcript	0	1.53412	#NAME?	8.94309e-05	0.011849
mmu-miR-1983	105.935	21.8472	2.0109	2.9055e-07	1.5022e-05	NM_009565.5	22724	Ccbe1	transcript	4.12497	2.16341	0.931079	0.00148296	0.0328266
mmu-miR-1983	105.935	21.8472	2.0109	2.9055e-07	1.5022e-05	XM_006527801.2	14199	Ccbe1	transcript	0.0687997	1.44912	-4.39663	0.000106297	0.011849
mmu-miR-1983	105.935	21.8472	2.0109	2.9055e-07	1.5022e-05	XM_036155254.1	69632	Ccbe1	transcript	4.65604	2.21758	1.07012	6.94014e-06	0.00809735
mmu-miR-1983	105.935	21.8472	2.0109	2.9055e-07	1.5022e-05	XM_006505871.4	21366	Ccbe1	transcript	0	11.8486	#NAME?	0.000348779	0.0150187
mmu-miR-1983	105.935	21.8472	2.0109	2.9055e-07	1.5022e-05	NM_001025572.1	106585	Ccbe1	transcript	2.84917	4.56201	-0.67913	0.0027118	0.0450388
mmu-miR-1983	105.935	21.8472	2.0109	2.9055e-07	1.5022e-05	TCONS_00024982	22284	Ccbe1	transcript	0.0341417	4.42644	-7.01847	0.000565246	0.0196753
mmu-miR-1983	105.935	21.8472	2.0109	2.9055e-07	1.5022e-05	NM_001169577.1	22214	Ccbe1	transcript	0.0879423	1.41218	-4.00523	0.000335305	0.0146524
mmu-miR-1983	105.935	21.8472	2.0109	2.9055e-07	1.5022e-05	NM_001163332.1	80281	Ccbe1	transcript	0	3.51781	#NAME?	0.00164595	0.0341909
mmu-miR-1983	105.935	21.8472	2.0109	2.9055e-07	1.5022e-05	NM_001113563.2	20851	Ccbe1	transcript	16.5189	9.88304	0.741088	0.00313081	0.049005
mmu-miR-1983	105.935	21.8472	2.0109	2.9055e-07	1.5022e-05	XM_006511156.2	24127	Ccbe1	transcript	0	1.84218	#NAME?	0.000225398	0.0120256
mmu-miR-1983	105.935	21.8472	2.0109	2.9055e-07	1.5022e-05	NM_001024504.2	102323	Ccbe1	transcript	18.3441	6.86252	1.41851	0.000108632	0.011849
mmu-miR-1983	105.935	21.8472	2.0109	2.9055e-07	1.5022e-05	NM_001164441.1	67434	Ccbe1	transcript	8.59489	4.39847	0.966478	0.00240277	0.0424412
mmu-miR-1983	105.935	21.8472	2.0109	2.9055e-07	1.5022e-05	NM_011782.2	23794	Ccbe1	transcript	7.2282	4.15903	0.79739	0.0015713	0.0335072
mmu-miR-1983	105.935	21.8472	2.0109	2.9055e-07	1.5022e-05	XM_011239063.3	227634	Ccbe1	transcript	0.006683	0.967055	-7.17696	0.000213459	0.0119058
mmu-miR-1983	105.935	21.8472	2.0109	2.9055e-07	1.5022e-05	NM_029436.3	75785	Ccbe1	transcript	0.247428	12.2514	-5.6298	1.70221e-05	0.00898899
mmu-miR-1983	105.935	21.8472	2.0109	2.9055e-07	1.5022e-05	TCONS_00005936	242474	Ccbe1	transcript	1.57062	2.8449	-0.857041	0.000608684	0.0199437
mmu-miR-1983	105.935	21.8472	2.0109	2.9055e-07	1.5022e-05	NM_023260.2	79044	Ccbe1	transcript	34.4689	26.2228	0.394476	0.000286332	0.0132564
mmu-miR-1983	105.935	21.8472	2.0109	2.9055e-07	1.5022e-05	NM_080708.1	140780	Ccbe1	transcript	3.11057	1.31645	1.24053	0.000700149	0.0216299
mmu-miR-1983	105.935	21.8472	2.0109	2.9055e-07	1.5022e-05	NM_001379355.1	68428	Ccn2	transcript	5.88743	0.378303	3.96002	0.00176546	0.0355779
mmu-miR-1983	105.935	21.8472	2.0109	2.9055e-07	1.5022e-05	NM_024197.1	67273	Ccn2	transcript	263.583	173.573	0.602715	0.00152683	0.0331249
mmu-miR-1983	105.935	21.8472	2.0109	2.9055e-07	1.5022e-05	NM_138651.7	110911	Ccn2	transcript	29.7644	31.9439	-0.101955	0.00102009	0.0269116
mmu-miR-1983	105.935	21.8472	2.0109	2.9055e-07	1.5022e-05	NM_001374745.1	53379	Ccn2	transcript	3.21129	1.24375	1.36845	0.00101713	0.0268837
mmu-miR-1983	105.935	21.8472	2.0109	2.9055e-07	1.5022e-05	NM_001013024.2	72607	Ccn2	transcript	60.8719	43.9871	0.468694	0.00218064	0.0401731
mmu-miR-1983	105.935	21.8472	2.0109	2.9055e-07	1.5022e-05	TCONS_00022825	74762	Ccn2	transcript	2.27339	0	Inf	0.000284564	0.0132564
mmu-miR-1983	105.935	21.8472	2.0109	2.9055e-07	1.5022e-05	NM_020496.3	57246	Ccn2	transcript	0.561424	1.58799	-1.50004	0.000600662	0.0199437
mmu-miR-1983	105.935	21.8472	2.0109	2.9055e-07	1.5022e-05	XM_006539145.5	68703	Ccrl2	transcript	0.184451	1.30383	-2.82145	0.000308043	0.0139803
mmu-miR-1983	105.935	21.8472	2.0109	2.9055e-07	1.5022e-05	XM_030253140.2	12540	Ccrl2	transcript	3.26466	0	Inf	0.00129193	0.0301528
mmu-miR-1983	105.935	21.8472	2.0109	2.9055e-07	1.5022e-05	NM_001347446.1	94089	Ccrl2	transcript	17.6916	1.16147	3.92903	0.000121578	0.011849
mmu-miR-1983	105.935	21.8472	2.0109	2.9055e-07	1.5022e-05	XM_036161518.1	22359	Ccrl2	transcript	43.687	2.02854	4.42869	3.29608e-05	0.0109036
mmu-miR-1983	105.935	21.8472	2.0109	2.9055e-07	1.5022e-05	TCONS_00002486	68295	Cd59a	transcript	0	1.18122	#NAME?	0.000208101	0.011849
mmu-miR-1983	105.935	21.8472	2.0109	2.9055e-07	1.5022e-05	NM_011207.2	545622	Cd59a	transcript	0.0298263	2.85143	-6.57895	5.67792e-05	0.011849
mmu-miR-1983	105.935	21.8472	2.0109	2.9055e-07	1.5022e-05	NM_011838.4	23936	Cd59a	transcript	70.7077	25.7672	1.45633	0.000325774	0.0144091
mmu-miR-1983	105.935	21.8472	2.0109	2.9055e-07	1.5022e-05	NM_001370902.1	665700	Cd59a	transcript	7.60778	1.38907	2.45336	3.91995e-05	0.0115968
mmu-miR-1983	105.935	21.8472	2.0109	2.9055e-07	1.5022e-05	NM_198626.2	268880	Cd59a	transcript	4.97798	3.01811	0.721913	0.0023038	0.0414115
mmu-miR-1983	105.935	21.8472	2.0109	2.9055e-07	1.5022e-05	NM_018779.2	54611	Cd59a	transcript	9.7464	25.8013	-1.4045	0.000703119	0.0216341
mmu-miR-1983	105.935	21.8472	2.0109	2.9055e-07	1.5022e-05	NM_133887.4	100226	Cd59a	transcript	18.1157	17.7267	0.0313165	0.00297755	0.047773
mmu-miR-1983	105.935	21.8472	2.0109	2.9055e-07	1.5022e-05	NM_028903.2	71145	Cd59a	transcript	9.59063	4.30715	1.15489	0.000145689	0.011849
mmu-miR-1983	105.935	21.8472	2.0109	2.9055e-07	1.5022e-05	NM_009779.2	12267	Cd59a	transcript	3.10675	0.748602	2.05314	0.00198156	0.0379124
mmu-miR-1983	105.935	21.8472	2.0109	2.9055e-07	1.5022e-05	NM_025788.3	66830	Cd59a	transcript	10.8813	6.39523	0.766786	0.000381223	0.0160261
mmu-miR-1983	105.935	21.8472	2.0109	2.9055e-07	1.5022e-05	NM_025828.3	66890	Cdc42	transcript	23.7589	13.183	0.849788	0.00222884	0.0407016
mmu-miR-1983	105.935	21.8472	2.0109	2.9055e-07	1.5022e-05	NM_001130165.2	170719	Cdc42	transcript	0.014798	2.56766	-7.43891	0.000177853	0.011849
mmu-miR-1983	105.935	21.8472	2.0109	2.9055e-07	1.5022e-05	XM_030243769.1	93691	Cdc42	transcript	0.003252	2.77016	-9.73443	0.0006671	0.0210018
mmu-miR-1983	105.935	21.8472	2.0109	2.9055e-07	1.5022e-05	NM_178357.3	194655	Cdc42	transcript	3.65517	5.69257	-0.639141	0.00181779	0.0363209
mmu-miR-1983	105.935	21.8472	2.0109	2.9055e-07	1.5022e-05	NM_019389.2	13003	Cdc42	transcript	2.31924	3.05164	-0.395936	0.00210026	0.0393487
mmu-miR-1983	105.935	21.8472	2.0109	2.9055e-07	1.5022e-05	NM_028784.3	74145	Cdc73	transcript	23.5443	8.04171	1.5498	0.000959852	0.0261504
mmu-miR-1983	105.935	21.8472	2.0109	2.9055e-07	1.5022e-05	XM_017317866.3	225131	Cdc73	transcript	0.119621	1.86033	-3.95902	0.00123663	0.0296436
mmu-miR-1983	105.935	21.8472	2.0109	2.9055e-07	1.5022e-05	NM_175036.4	230514	Cdc73	transcript	9.35461	10.555	-0.174176	0.000232174	0.0120484
mmu-miR-1983	105.935	21.8472	2.0109	2.9055e-07	1.5022e-05	NM_153542.1	216011	Cdc73	transcript	13.872	5.18166	1.42069	0.000640899	0.0205534
mmu-miR-1983	105.935	21.8472	2.0109	2.9055e-07	1.5022e-05	NM_001033634.3	414872	Cdc73	transcript	24.65	7.93958	1.63445	0.00064772	0.0206452
mmu-miR-1983	105.935	21.8472	2.0109	2.9055e-07	1.5022e-05	NM_008467.4	16649	Cdc73	transcript	40.2608	22.3532	0.848894	0.00138369	0.0314147
mmu-miR-1983	105.935	21.8472	2.0109	2.9055e-07	1.5022e-05	NM_001110843.1	12293	Cdc73	transcript	5.55837	0	Inf	9.14502e-06	0.00809735
mmu-miR-1983	105.935	21.8472	2.0109	2.9055e-07	1.5022e-05	NM_001190985.1	14768	Cdc73	transcript	4.04587	1.43319	1.49722	0.00208825	0.0392885
mmu-miR-1983	105.935	21.8472	2.0109	2.9055e-07	1.5022e-05	XM_006527268.4	66980	Cdc73	transcript	7.12351	2.22921	1.67606	0.000398742	0.0162795
mmu-miR-1983	105.935	21.8472	2.0109	2.9055e-07	1.5022e-05	NM_001374656.1	330938	Cdc73	transcript	0.09835	4.32228	-5.45772	0.000928627	0.025695
mmu-miR-1983	105.935	21.8472	2.0109	2.9055e-07	1.5022e-05	TCONS_00009768	78286	Cdc73	transcript	5.80375	0.092506	5.9713	0.000875541	0.0248661
mmu-miR-1983	105.935	21.8472	2.0109	2.9055e-07	1.5022e-05	TCONS_00001759	140858	Cdc73	transcript	0	1.07967	#NAME?	0.000208101	0.011849
mmu-miR-1983	105.935	21.8472	2.0109	2.9055e-07	1.5022e-05	NM_001081236.1	76792	Cdc73	transcript	8.82049	3.09024	1.51314	0.00010701	0.011849
mmu-miR-1983	105.935	21.8472	2.0109	2.9055e-07	1.5022e-05	NM_001324531.1	19340	Cdc73	transcript	4.60047	5.82791	-0.341197	0.00247029	0.0430463
mmu-miR-1983	105.935	21.8472	2.0109	2.9055e-07	1.5022e-05	XM_006507189.4	109264	Cdc73	transcript	12.3611	5.99776	1.04331	1.94183e-05	0.00898899
mmu-miR-1983	105.935	21.8472	2.0109	2.9055e-07	1.5022e-05	NM_001114174.1	381217	Cdc73	transcript	12.8644	15.5508	-0.27361	0.00274393	0.0453069
mmu-miR-1983	105.935	21.8472	2.0109	2.9055e-07	1.5022e-05	NM_177694.6	233246	Cdc73	transcript	3.85376	0.082852	5.53959	0.000507885	0.0186404
mmu-miR-1983	105.935	21.8472	2.0109	2.9055e-07	1.5022e-05	NM_008681.2	17988	Cdc73	transcript	8.39281	13.4879	-0.684435	0.000598646	0.0199437
mmu-miR-1983	105.935	21.8472	2.0109	2.9055e-07	1.5022e-05	TCONS_00016863	76626	Cdc73	transcript	0	1.46752	#NAME?	0.000208101	0.011849
mmu-miR-1983	105.935	21.8472	2.0109	2.9055e-07	1.5022e-05	XM_011239446.4	228026	Cdc73	transcript	0	3.2763	#NAME?	0.000208101	0.011849
mmu-miR-1983	105.935	21.8472	2.0109	2.9055e-07	1.5022e-05	XM_006518778.1	211922	Cdc73	transcript	0.021746	0.97065	-5.48013	0.00024897	0.0125076
mmu-miR-1983	105.935	21.8472	2.0109	2.9055e-07	1.5022e-05	TCONS_00003278	20402	Cdc73	transcript	52.6669	30.2475	0.800081	0.00235328	0.041883
mmu-miR-1983	105.935	21.8472	2.0109	2.9055e-07	1.5022e-05	NM_001359370.1	69940	Cdc73	transcript	0.0925387	1.34815	-3.86478	0.000450055	0.0172789
mmu-miR-1983	105.935	21.8472	2.0109	2.9055e-07	1.5022e-05	NM_001362974.1	67733	Cdc73	transcript	2.16401	3.2316	-0.578541	0.0010405	0.0272977
mmu-miR-1983	105.935	21.8472	2.0109	2.9055e-07	1.5022e-05	XM_006539897.3	233103	Cdc73	transcript	0.00112633	0.853869	-9.56624	0.000196093	0.011849
mmu-miR-1983	105.935	21.8472	2.0109	2.9055e-07	1.5022e-05	NM_145401.2	108099	Cdc73	transcript	3.05641	0.26636	3.52039	0.000663898	0.0209475
mmu-miR-1983	105.935	21.8472	2.0109	2.9055e-07	1.5022e-05	NM_029573.2	67834	Cdc73	transcript	206.397	102.21	1.01388	0.00038848	0.0160924
mmu-miR-1983	105.935	21.8472	2.0109	2.9055e-07	1.5022e-05	NM_133167.3	170736	Cdc73	transcript	17.1236	14.1036	0.279927	0.00171586	0.0349765
mmu-miR-1983	105.935	21.8472	2.0109	2.9055e-07	1.5022e-05	NM_011436.4	20660	Cdc73	transcript	2.80025	0.980742	1.51361	0.000432615	0.0168945
mmu-miR-1983	105.935	21.8472	2.0109	2.9055e-07	1.5022e-05	NM_176933.4	319520	Cdc73	transcript	0.745019	2.95323	-1.98694	7.6233e-05	0.011849
mmu-miR-1983	105.935	21.8472	2.0109	2.9055e-07	1.5022e-05	NM_026605.2	68188	Cdc73	transcript	0.084507	14.8845	-7.46053	5.32149e-05	0.011849
mmu-miR-1983	105.935	21.8472	2.0109	2.9055e-07	1.5022e-05	NM_133218.2	170753	Cdc73	transcript	4.21261	7.10953	-0.755041	0.00042631	0.0168243
mmu-miR-1983	105.935	21.8472	2.0109	2.9055e-07	1.5022e-05	NM_018738.4	16145	Cdip1	transcript	8.95302	4.35064	1.04115	0.000598084	0.0199437
mmu-miR-1983	105.935	21.8472	2.0109	2.9055e-07	1.5022e-05	NM_145991.2	214498	Cdip1	transcript	0.353721	3.55633	-3.32971	0.000125934	0.011849
mmu-miR-1983	105.935	21.8472	2.0109	2.9055e-07	1.5022e-05	NM_011065.5	18626	Cdip1	transcript	5.40945	15.0573	-1.47691	0.00254728	0.0436594
mmu-miR-1983	105.935	21.8472	2.0109	2.9055e-07	1.5022e-05	TCONS_00016035	70207	Cdip1	transcript	11.0295	4.75621	1.21348	0.000540072	0.0191482
mmu-miR-1983	105.935	21.8472	2.0109	2.9055e-07	1.5022e-05	XM_006535263.4	74596	Cdip1	transcript	3.53851	0.952123	1.89392	3.87076e-05	0.0115968
mmu-miR-22-5p	1951.7	773.714	1.2531	0.00013988	0.0025207	NM_026605.2	68188	Cdip1	transcript	0.084507	14.8845	-7.46053	5.32149e-05	0.011849
mmu-miR-22-5p	1951.7	773.714	1.2531	0.00013988	0.0025207	XM_006516668.5	238564	Cdip1	transcript	51.8504	20.0108	1.37358	0.0016558	0.0342949
mmu-miR-22-5p	1951.7	773.714	1.2531	0.00013988	0.0025207	XM_036158779.1	64652	Cdip1	transcript	0.085711	1.0889	-3.66725	3.06078e-05	0.0109036
mmu-miR-22-5p	1951.7	773.714	1.2531	0.00013988	0.0025207	NM_001109910.1	83701	Cdip1	transcript	2.51714	0.241925	3.37916	5.09413e-05	0.011849
mmu-miR-22-5p	1951.7	773.714	1.2531	0.00013988	0.0025207	NM_008663.2	17921	Cdip1	transcript	2.93167	0.100171	4.87119	0.00182502	0.0363643
mmu-miR-22-5p	1951.7	773.714	1.2531	0.00013988	0.0025207	XM_030243292.2	14339	Cdip1	transcript	4.38843	0.005714	9.58499	0.00282564	0.046332
mmu-miR-22-5p	1951.7	773.714	1.2531	0.00013988	0.0025207	TCONS_00001032	21961	Cdip1	transcript	45.687	0.543971	6.39211	0.000464811	0.017514
mmu-miR-22-5p	1951.7	773.714	1.2531	0.00013988	0.0025207	NM_145991.2	214498	Cdip1	transcript	0.353721	3.55633	-3.32971	0.000125934	0.011849
mmu-miR-22-5p	1951.7	773.714	1.2531	0.00013988	0.0025207	NM_172704.3	230935	Cdip1	transcript	13.73	9.30421	0.561371	0.00106788	0.0276071
mmu-miR-22-5p	1951.7	773.714	1.2531	0.00013988	0.0025207	NM_133218.2	170753	Cdip1	transcript	4.21261	7.10953	-0.755041	0.00042631	0.0168243
mmu-miR-22-5p	1951.7	773.714	1.2531	0.00013988	0.0025207	NM_177694.6	233246	Cdip1	transcript	3.85376	0.082852	5.53959	0.000507885	0.0186404
mmu-miR-22-5p	1951.7	773.714	1.2531	0.00013988	0.0025207	NM_001362370.1	81601	Cdip1	transcript	0.382161	1.14742	-1.58615	0.000604559	0.0199437
mmu-miR-22-5p	1951.7	773.714	1.2531	0.00013988	0.0025207	XM_006507189.4	109264	Cdip1	transcript	12.3611	5.99776	1.04331	1.94183e-05	0.00898899
mmu-miR-22-5p	1951.7	773.714	1.2531	0.00013988	0.0025207	NM_001081236.1	76792	Cdk8	transcript	8.82049	3.09024	1.51314	0.00010701	0.011849
mmu-miR-22-5p	1951.7	773.714	1.2531	0.00013988	0.0025207	NM_028814.4	74200	Cdk8	transcript	5.63096	1.05907	2.41059	0.000336136	0.0146524
mmu-miR-22-5p	1951.7	773.714	1.2531	0.00013988	0.0025207	TCONS_00009768	78286	Cdk8	transcript	5.80375	0.092506	5.9713	0.000875541	0.0248661
mmu-miR-22-5p	1951.7	773.714	1.2531	0.00013988	0.0025207	TCONS_00001759	140858	Cdk8	transcript	0	1.07967	#NAME?	0.000208101	0.011849
mmu-miR-22-5p	1951.7	773.714	1.2531	0.00013988	0.0025207	NM_025711.3	66695	Cdk8	transcript	9.53404	13.3333	-0.483869	0.00190709	0.0373173
mmu-miR-22-5p	1951.7	773.714	1.2531	0.00013988	0.0025207	NM_001362974.1	67733	Cdk8	transcript	2.16401	3.2316	-0.578541	0.0010405	0.0272977
mmu-miR-22-5p	1951.7	773.714	1.2531	0.00013988	0.0025207	TCONS_00003278	20402	Cdk8	transcript	52.6669	30.2475	0.800081	0.00235328	0.041883
mmu-miR-22-5p	1951.7	773.714	1.2531	0.00013988	0.0025207	XM_011239446.4	228026	Cdk8	transcript	0	3.2763	#NAME?	0.000208101	0.011849
mmu-miR-22-5p	1951.7	773.714	1.2531	0.00013988	0.0025207	NM_001359509.1	67972	Cdk8	transcript	0	1.05284	#NAME?	0.000208101	0.011849
mmu-miR-22-5p	1951.7	773.714	1.2531	0.00013988	0.0025207	NM_010771.6	17184	Cdk8	transcript	26.9851	29.161	-0.111874	0.000439264	0.0170029
mmu-miR-22-5p	1951.7	773.714	1.2531	0.00013988	0.0025207	NM_001013786.3	432731	Cds1	transcript	0	1.47175	#NAME?	0.000843935	0.0243504
mmu-miR-22-5p	1951.7	773.714	1.2531	0.00013988	0.0025207	TCONS_00016838	67300	Cds1	transcript	0	1.55373	#NAME?	0.000208101	0.011849
mmu-miR-22-5p	1951.7	773.714	1.2531	0.00013988	0.0025207	NM_025828.3	66890	Cds1	transcript	23.7589	13.183	0.849788	0.00222884	0.0407016
mmu-miR-22-5p	1951.7	773.714	1.2531	0.00013988	0.0025207	XM_030245515.2	12808	Cds1	transcript	0	1.22489	#NAME?	0.000151503	0.011849
mmu-miR-22-5p	1951.7	773.714	1.2531	0.00013988	0.0025207	NM_026452.3	67914	Cds1	transcript	159.771	104.748	0.609082	0.00255392	0.0436594
mmu-miR-22-5p	1951.7	773.714	1.2531	0.00013988	0.0025207	XM_011241067.2	320609	Cds1	transcript	0.341589	2.13166	-2.64164	0.000149829	0.011849
mmu-miR-22-5p	1951.7	773.714	1.2531	0.00013988	0.0025207	TCONS_00020139	16880	Cds1	transcript	0	1.30271	#NAME?	0.000208101	0.011849
mmu-miR-22-5p	1951.7	773.714	1.2531	0.00013988	0.0025207	NM_001135112.1	83945	Cds1	transcript	39.0553	23.1091	0.757061	0.00186454	0.036841
mmu-miR-22-5p	1951.7	773.714	1.2531	0.00013988	0.0025207	NM_023824.3	76498	Cds1	transcript	11.489	5.29525	1.11749	0.00313365	0.049005
mmu-miR-22-5p	1951.7	773.714	1.2531	0.00013988	0.0025207	XM_036162959.1	19299	Cds2	transcript	16.611	2.38557	2.79974	0.000196089	0.011849
mmu-miR-22-5p	1951.7	773.714	1.2531	0.00013988	0.0025207	NM_001374656.1	330938	Cds2	transcript	0.09835	4.32228	-5.45772	0.000928627	0.025695
mmu-miR-22-5p	1951.7	773.714	1.2531	0.00013988	0.0025207	TCONS_00018645	238505	Cds2	transcript	31.0669	4.54431	2.77324	0.000120377	0.011849
mmu-miR-22-5p	1951.7	773.714	1.2531	0.00013988	0.0025207	TCONS_00024215	353211	Cds2	transcript	3.50495	1.28129	1.45179	0.00236797	0.0420917
mmu-miR-22-5p	1951.7	773.714	1.2531	0.00013988	0.0025207	XM_006527268.4	66980	Cds2	transcript	7.12351	2.22921	1.67606	0.000398742	0.0162795
mmu-miR-22-5p	1951.7	773.714	1.2531	0.00013988	0.0025207	XM_006522654.4	74143	Cds2	transcript	0.437384	6.77251	-3.95272	0.000882794	0.0249632
mmu-miR-22-5p	1951.7	773.714	1.2531	0.00013988	0.0025207	NM_153542.1	216011	Cds2	transcript	13.872	5.18166	1.42069	0.000640899	0.0205534
mmu-miR-22-5p	1951.7	773.714	1.2531	0.00013988	0.0025207	XM_011245736.3	72193	Cds2	transcript	0	1.69055	#NAME?	0.000208101	0.011849
mmu-miR-22-5p	1951.7	773.714	1.2531	0.00013988	0.0025207	NM_001033430.4	338523	Cds2	transcript	8.64604	9.2492	-0.0972903	0.00160869	0.0338712
mmu-miR-22-5p	1951.7	773.714	1.2531	0.00013988	0.0025207	XM_036161518.1	22359	Cds2	transcript	43.687	2.02854	4.42869	3.29608e-05	0.0109036
mmu-miR-22-5p	1951.7	773.714	1.2531	0.00013988	0.0025207	TCONS_00007881	56430	Cds2	transcript	0.532009	2.12216	-1.99601	0.00045144	0.0172853
mmu-miR-22-5p	1951.7	773.714	1.2531	0.00013988	0.0025207	NM_020496.3	57246	Cds2	transcript	0.561424	1.58799	-1.50004	0.000600662	0.0199437
mmu-miR-22-5p	1951.7	773.714	1.2531	0.00013988	0.0025207	TCONS_00018638	20191	Cds2	transcript	46.8941	17.9574	1.38483	0.0015578	0.0335072
mmu-miR-22-5p	1951.7	773.714	1.2531	0.00013988	0.0025207	NM_001013024.2	72607	Cds2	transcript	60.8719	43.9871	0.468694	0.00218064	0.0401731
mmu-miR-22-5p	1951.7	773.714	1.2531	0.00013988	0.0025207	XM_011238527.4	269198	Cds2	transcript	0.130446	1.37408	-3.39694	0.00227693	0.041197
mmu-miR-22-5p	1951.7	773.714	1.2531	0.00013988	0.0025207	NM_001365015.1	225341	Cds2	transcript	5.10764	0.034765	7.19888	0.000396087	0.0162795
mmu-miR-22-5p	1951.7	773.714	1.2531	0.00013988	0.0025207	NM_029665.4	76582	Cds2	transcript	7.29821	4.40754	0.727569	0.000227082	0.0120256
mmu-miR-22-5p	1951.7	773.714	1.2531	0.00013988	0.0025207	NM_145704.2	80906	Cds2	transcript	9.20852	27.3589	-1.57097	0.00310875	0.0488808
mmu-miR-22-5p	1951.7	773.714	1.2531	0.00013988	0.0025207	XM_036163810.1	18027	Cds2	transcript	0	1.75944	#NAME?	0.00117499	0.0288995
mmu-miR-22-5p	1951.7	773.714	1.2531	0.00013988	0.0025207	NM_001080131.2	21917	Cds2	transcript	0	2.27004	#NAME?	6.13974e-05	0.011849
mmu-miR-22-5p	1951.7	773.714	1.2531	0.00013988	0.0025207	NM_001359858.1	66923	Cds2	transcript	0	1.00614	#NAME?	0.000208101	0.011849
mmu-miR-22-5p	1951.7	773.714	1.2531	0.00013988	0.0025207	NM_001370902.1	665700	Cds2	transcript	7.60778	1.38907	2.45336	3.91995e-05	0.0115968
mmu-miR-22-5p	1951.7	773.714	1.2531	0.00013988	0.0025207	XM_006532843.2	216739	Cds2	transcript	4.0953	0.00190133	11.0727	0.000944224	0.0260079
mmu-miR-22-5p	1951.7	773.714	1.2531	0.00013988	0.0025207	NM_011207.2	545622	Cds2	transcript	0.0298263	2.85143	-6.57895	5.67792e-05	0.011849
mmu-miR-22-5p	1951.7	773.714	1.2531	0.00013988	0.0025207	TCONS_00004589	74383	Cds2	transcript	0.687664	2.32507	-1.7575	0.000928627	0.025695
mmu-miR-22-5p	1951.7	773.714	1.2531	0.00013988	0.0025207	NM_001024606.2	382051	Cds2	transcript	14.6334	3.49019	2.06789	0.00110784	0.0280764
mmu-miR-22-5p	1951.7	773.714	1.2531	0.00013988	0.0025207	NM_001037859.2	12978	Cds2	transcript	16.1218	5.74739	1.48803	0.00326079	0.0499953
mmu-miR-22-5p	1951.7	773.714	1.2531	0.00013988	0.0025207	NM_029436.3	75785	Cds2	transcript	0.247428	12.2514	-5.6298	1.70221e-05	0.00898899
mmu-miR-22-5p	1951.7	773.714	1.2531	0.00013988	0.0025207	XM_011239063.3	227634	Cds2	transcript	0.006683	0.967055	-7.17696	0.000213459	0.0119058
mmu-miR-22-5p	1951.7	773.714	1.2531	0.00013988	0.0025207	NM_018743.4	102247	Cep104	transcript	13.5676	7.76624	0.804877	0.000326486	0.0144091
mmu-miR-22-5p	1951.7	773.714	1.2531	0.00013988	0.0025207	NM_145460.2	218885	Cep104	transcript	26.5147	15.1023	0.812022	0.00140182	0.0317246
mmu-miR-22-5p	1951.7	773.714	1.2531	0.00013988	0.0025207	TCONS_00000331	347722	Cep104	transcript	0.0155523	1.00315	-6.01126	0.000242995	0.0123388
mmu-miR-22-5p	1951.7	773.714	1.2531	0.00013988	0.0025207	NM_023505.2	69367	Cep104	transcript	0	0.920794	#NAME?	0.000208101	0.011849
mmu-miR-22-5p	1951.7	773.714	1.2531	0.00013988	0.0025207	XM_006524674.5	56468	Cep104	transcript	0.00126167	2.99592	-11.2135	0.000178928	0.011849
mmu-miR-22-5p	1951.7	773.714	1.2531	0.00013988	0.0025207	NM_001379355.1	68428	Cep104	transcript	5.88743	0.378303	3.96002	0.00176546	0.0355779
mmu-miR-22-5p	1951.7	773.714	1.2531	0.00013988	0.0025207	NM_133985.2	108737	Cep104	transcript	1.89358	7.15914	-1.91867	0.00178092	0.0357724
mmu-miR-22-5p	1951.7	773.714	1.2531	0.00013988	0.0025207	NM_080708.1	140780	Cep104	transcript	3.11057	1.31645	1.24053	0.000700149	0.0216299
mmu-miR-22-5p	1951.7	773.714	1.2531	0.00013988	0.0025207	NM_001358359.1	223649	Cep104	transcript	4.18914	9.13984	-1.12551	0.00260867	0.0441014
mmu-miR-22-5p	1951.7	773.714	1.2531	0.00013988	0.0025207	NM_001127346.1	75597	Cep104	transcript	1.89839	6.35692	-1.74355	0.000426338	0.0168243
mmu-miR-22-5p	1951.7	773.714	1.2531	0.00013988	0.0025207	XM_006507470.5	19647	Cep104	transcript	4.54464	4.46107	0.0267746	0.0020459	0.0388008
mmu-miR-22-5p	1951.7	773.714	1.2531	0.00013988	0.0025207	NM_053159.4	94062	Cfh	transcript	44.4713	20.8991	1.08943	1.53811e-06	0.00606699
mmu-miR-22-5p	1951.7	773.714	1.2531	0.00013988	0.0025207	XM_006505871.4	21366	Cfh	transcript	0	11.8486	#NAME?	0.000348779	0.0150187
mmu-miR-22-5p	1951.7	773.714	1.2531	0.00013988	0.0025207	NM_008617.2	17448	Cfh	transcript	542.541	345.903	0.649364	0.000236176	0.012135
mmu-miR-22-5p	1951.7	773.714	1.2531	0.00013988	0.0025207	XM_030248280.2	11512	Cfl2	transcript	0.0235687	1.77038	-6.23104	0.000785551	0.0231852
mmu-miR-22-5p	1951.7	773.714	1.2531	0.00013988	0.0025207	TCONS_00014560	381990	Cfl2	transcript	0.00696433	0.884197	-6.98824	0.000218168	0.0119919
mmu-miR-22-5p	1951.7	773.714	1.2531	0.00013988	0.0025207	NM_026518.4	68031	Cfl2	transcript	0.33629	1.86842	-2.47404	0.00023034	0.0120256
mmu-miR-22-5p	1951.7	773.714	1.2531	0.00013988	0.0025207	XM_011245729.1	71474	Cfl2	transcript	0.0370433	1.37594	-5.21506	0.000304843	0.0138865
mmu-miR-22-5p	1951.7	773.714	1.2531	0.00013988	0.0025207	TCONS_00001922	227937	Cfl2	transcript	1.80779	2.78593	-0.623933	0.0019647	0.0378189
mmu-miR-22-5p	1951.7	773.714	1.2531	0.00013988	0.0025207	TCONS_00024776	54132	Cfl2	transcript	0	3.89536	#NAME?	8.32405e-06	0.00809735
mmu-miR-22-5p	1951.7	773.714	1.2531	0.00013988	0.0025207	NM_010101.4	13610	Cfl2	transcript	6.62156	3.85762	0.779461	0.0016731	0.034352
mmu-miR-22-5p	1951.7	773.714	1.2531	0.00013988	0.0025207	NM_001164580.1	233812	Cgrrf1	transcript	3.49234	4.10635	-0.233664	0.000328963	0.0144734
mmu-miR-22-5p	1951.7	773.714	1.2531	0.00013988	0.0025207	NM_011435.3	20657	Cgrrf1	transcript	14.5721	6.60321	1.14197	0.00303919	0.0482692
mmu-miR-22-5p	1951.7	773.714	1.2531	0.00013988	0.0025207	TCONS_00025673	20603	Cgrrf1	transcript	0	0.904215	#NAME?	0.000208101	0.011849
mmu-miR-22-5p	1951.7	773.714	1.2531	0.00013988	0.0025207	TCONS_00013940	17281	Cgrrf1	transcript	0	4.89149	#NAME?	0.000208101	0.011849
mmu-miR-22-5p	1951.7	773.714	1.2531	0.00013988	0.0025207	TCONS_00024982	22284	Chd4	transcript	0.0341417	4.42644	-7.01847	0.000565246	0.0196753
mmu-miR-22-5p	1951.7	773.714	1.2531	0.00013988	0.0025207	NM_007798.3	13030	Chd4	transcript	103.575	44.5757	1.21635	0.000581467	0.0198239
mmu-miR-22-5p	1951.7	773.714	1.2531	0.00013988	0.0025207	NM_001169577.1	22214	Chd4	transcript	0.0879423	1.41218	-4.00523	0.000335305	0.0146524
mmu-miR-22-5p	1951.7	773.714	1.2531	0.00013988	0.0025207	NM_001025572.1	106585	Chd4	transcript	2.84917	4.56201	-0.67913	0.0027118	0.0450388
mmu-miR-22-5p	1951.7	773.714	1.2531	0.00013988	0.0025207	NM_145541.5	109905	Chd4	transcript	15.3453	0.71136	4.43107	0.00178106	0.0357724
mmu-miR-22-5p	1951.7	773.714	1.2531	0.00013988	0.0025207	NM_199029.2	380912	Cherp	transcript	0.873976	4.10068	-2.2302	8.95514e-05	0.011849
mmu-miR-22-5p	1951.7	773.714	1.2531	0.00013988	0.0025207	NM_175022.3	233210	Cherp	transcript	3.51823	6.79684	-0.950013	0.000676499	0.0211566
mmu-miR-22-5p	1951.7	773.714	1.2531	0.00013988	0.0025207	NM_011500.3	268980	Cherp	transcript	9.79792	10.3345	-0.0769267	0.00263953	0.0444112
mmu-miR-22-5p	1951.7	773.714	1.2531	0.00013988	0.0025207	XM_030250546.2	56386	Cherp	transcript	0.00943533	1.70533	-7.49777	0.000179154	0.011849
mmu-miR-22-5p	1951.7	773.714	1.2531	0.00013988	0.0025207	NM_001171000.2	74340	Chp1	transcript	5.19366	5.65173	-0.12194	0.00149626	0.0328408
mmu-miR-22-5p	1951.7	773.714	1.2531	0.00013988	0.0025207	NM_198703.3	232341	Chp1	transcript	33.5824	16.562	1.01983	0.000117898	0.011849
mmu-miR-22-5p	1951.7	773.714	1.2531	0.00013988	0.0025207	NM_001167860.2	330319	Chp1	transcript	5.83695	2.65031	1.13905	0.000584908	0.0198239
mmu-miR-22-5p	1951.7	773.714	1.2531	0.00013988	0.0025207	TCONS_00021604	66626	Chp1	transcript	0.013365	0.954189	-6.15774	0.000279953	0.0131685
mmu-miR-22-5p	1951.7	773.714	1.2531	0.00013988	0.0025207	NM_024288.2	68477	Chp1	transcript	27.6091	14.9293	0.887002	0.000595645	0.0199437
mmu-miR-22-5p	1951.7	773.714	1.2531	0.00013988	0.0025207	NM_001142957.1	100043468	Ciart	transcript	6.14218	3.75226	0.71099	0.00229483	0.0413623
mmu-miR-22-5p	1951.7	773.714	1.2531	0.00013988	0.0025207	NM_001012477.2	20315	Ciart	transcript	41.9226	8.72303	2.26483	0.00250906	0.0434547
mmu-miR-22-5p	1951.7	773.714	1.2531	0.00013988	0.0025207	XM_036158471.1	15460	Ciart	transcript	9.9772	0	Inf	0.000540643	0.0191482
mmu-miR-22-5p	1951.7	773.714	1.2531	0.00013988	0.0025207	NM_178793.4	320924	Cirbp	transcript	4.66364	1.19089	1.96941	0.00195321	0.0377505
mmu-miR-22-5p	1951.7	773.714	1.2531	0.00013988	0.0025207	TCONS_00012919	17999	Cirbp	transcript	121.808	126.953	-0.0596877	0.000984095	0.0263548
mmu-miR-22-5p	1951.7	773.714	1.2531	0.00013988	0.0025207	NM_026192.3	67488	Clip1	transcript	24.0407	36.1119	-0.586996	0.00100726	0.0267227
mmu-miR-22-5p	1951.7	773.714	1.2531	0.00013988	0.0025207	XM_006500784.4	269424	Clip1	transcript	0.0240483	2.34219	-6.60578	0.00298096	0.047773
mmu-miR-22-5p	1951.7	773.714	1.2531	0.00013988	0.0025207	XM_017320585.3	100972	Clip1	transcript	15.6801	9.57027	0.712305	0.00143583	0.0322223
mmu-miR-22-5p	1951.7	773.714	1.2531	0.00013988	0.0025207	NM_024212.4	67891	Clip1	transcript	110.136	146.495	-0.41156	0.00209638	0.039337
mmu-miR-22-5p	1951.7	773.714	1.2531	0.00013988	0.0025207	TCONS_00020940	57259	Clip1	transcript	0	4.26412	#NAME?	0.000208101	0.011849
mmu-miR-22-5p	1951.7	773.714	1.2531	0.00013988	0.0025207	TCONS_00016218	18016	Clip1	transcript	0	3.89182	#NAME?	0.000208101	0.011849
mmu-miR-22-5p	1951.7	773.714	1.2531	0.00013988	0.0025207	NM_013845.5	26563	Clip1	transcript	1.47389	3.10351	-1.07427	0.000574774	0.0198218
mmu-miR-22-5p	1951.7	773.714	1.2531	0.00013988	0.0025207	NM_027445.3	70510	Clip1	transcript	11.86	0.0243333	8.92895	3.41099e-05	0.0109036
mmu-miR-22-5p	1951.7	773.714	1.2531	0.00013988	0.0025207	NM_009061.4	19735	Clip1	transcript	3.92395	10.8135	-1.46246	0.0027111	0.0450388
mmu-miR-22-5p	1951.7	773.714	1.2531	0.00013988	0.0025207	NM_001291068.1	20020	Clip1	transcript	9.68532	12.3441	-0.349951	0.000784359	0.0231852
mmu-miR-22-5p	1951.7	773.714	1.2531	0.00013988	0.0025207	XM_006511665.5	20347	Clip1	transcript	0.0735617	2.21499	-4.9122	0.000737048	0.0222639
mmu-miR-22-5p	1951.7	773.714	1.2531	0.00013988	0.0025207	NM_010106.2	13627	Clip1	transcript	226.411	347.935	-0.61987	0.00184405	0.0365379
mmu-miR-22-5p	1951.7	773.714	1.2531	0.00013988	0.0025207	NM_009433.3	22110	Clip1	transcript	32.3123	27.2293	0.246923	0.000539287	0.0191482
mmu-miR-3473a	3.35088	15.1579	-1.7028	0.0031398	0.029502	XM_006522654.4	74143	Clip1	transcript	0.437384	6.77251	-3.95272	0.000882794	0.0249632
mmu-miR-3473a	3.35088	15.1579	-1.7028	0.0031398	0.029502	NM_001374656.1	330938	Clip1	transcript	0.09835	4.32228	-5.45772	0.000928627	0.025695
mmu-miR-3473a	3.35088	15.1579	-1.7028	0.0031398	0.029502	TCONS_00022664	16004	Clip1	transcript	0.0315017	2.14072	-6.08653	0.00110496	0.0280538
mmu-miR-3473a	3.35088	15.1579	-1.7028	0.0031398	0.029502	TCONS_00013489	75717	Clip1	transcript	0.00558833	1.23235	-7.78477	0.000152409	0.011849
mmu-miR-3473a	3.35088	15.1579	-1.7028	0.0031398	0.029502	NM_175398.4	109050	Clip1	transcript	13.7843	2.56575	2.42558	0.000824044	0.0239717
mmu-miR-3473a	3.35088	15.1579	-1.7028	0.0031398	0.029502	XM_030243769.1	93691	Clip1	transcript	0.003252	2.77016	-9.73443	0.0006671	0.0210018
mmu-miR-3473a	3.35088	15.1579	-1.7028	0.0031398	0.029502	XM_036155983.1	69288	Clip1	transcript	0.742536	5.72185	-2.94595	0.000750383	0.0225226
mmu-miR-3473a	3.35088	15.1579	-1.7028	0.0031398	0.029502	NM_172862.3	242022	Clk4	transcript	2.75139	0.440342	2.64346	0.000706243	0.0216341
mmu-miR-3473a	3.35088	15.1579	-1.7028	0.0031398	0.029502	XM_006532843.2	216739	Clk4	transcript	4.0953	0.00190133	11.0727	0.000944224	0.0260079
mmu-miR-3473a	3.35088	15.1579	-1.7028	0.0031398	0.029502	NM_172588.2	218442	Clk4	transcript	4.73797	4.64443	0.028766	0.00297412	0.047773
mmu-miR-3473a	3.35088	15.1579	-1.7028	0.0031398	0.029502	NM_019694.2	56384	Cltc	transcript	25.4967	5.73717	2.1519	0.000146779	0.011849
mmu-miR-3473a	3.35088	15.1579	-1.7028	0.0031398	0.029502	TCONS_00001243	70579	Cltc	transcript	0	3.03869	#NAME?	0.000208101	0.011849
mmu-miR-3473a	3.35088	15.1579	-1.7028	0.0031398	0.029502	TCONS_00022825	74762	Cmpk1	transcript	2.27339	0	Inf	0.000284564	0.0132564
mmu-miR-3473a	3.35088	15.1579	-1.7028	0.0031398	0.029502	NM_020496.3	57246	Cmpk1	transcript	0.561424	1.58799	-1.50004	0.000600662	0.0199437
mmu-miR-3473a	3.35088	15.1579	-1.7028	0.0031398	0.029502	XM_006539145.5	68703	Cmpk1	transcript	0.184451	1.30383	-2.82145	0.000308043	0.0139803
mmu-miR-3473a	3.35088	15.1579	-1.7028	0.0031398	0.029502	NM_001347446.1	94089	Cmpk1	transcript	17.6916	1.16147	3.92903	0.000121578	0.011849
mmu-miR-3473a	3.35088	15.1579	-1.7028	0.0031398	0.029502	NM_133218.2	170753	Cmpk1	transcript	4.21261	7.10953	-0.755041	0.00042631	0.0168243
mmu-miR-3473a	3.35088	15.1579	-1.7028	0.0031398	0.029502	NM_027215.2	69804	Cmpk1	transcript	74.1805	24.244	1.61341	0.00116191	0.0286773
mmu-miR-3473a	3.35088	15.1579	-1.7028	0.0031398	0.029502	NM_172704.3	230935	Cmpk1	transcript	13.73	9.30421	0.561371	0.00106788	0.0276071
mmu-miR-3473a	3.35088	15.1579	-1.7028	0.0031398	0.029502	NM_001033228.3	109700	Cmpk1	transcript	18.5636	8.06813	1.20217	0.00297749	0.047773
mmu-miR-3473a	3.35088	15.1579	-1.7028	0.0031398	0.029502	NM_011436.4	20660	Cmpk1	transcript	2.80025	0.980742	1.51361	0.000432615	0.0168945
mmu-miR-3473a	3.35088	15.1579	-1.7028	0.0031398	0.029502	NM_001013390.3	399548	Cmpk1	transcript	45.134	2.15251	4.39012	0.000262235	0.0127318
mmu-miR-3473a	3.35088	15.1579	-1.7028	0.0031398	0.029502	NM_133167.3	170736	Cnksr3	transcript	17.1236	14.1036	0.279927	0.00171586	0.0349765
mmu-miR-3473a	3.35088	15.1579	-1.7028	0.0031398	0.029502	NM_025616.3	66525	Cnksr3	transcript	24.91	15.1509	0.717323	0.00140422	0.0317282
mmu-miR-3473a	3.35088	15.1579	-1.7028	0.0031398	0.029502	XM_036158779.1	64652	Cnksr3	transcript	0.085711	1.0889	-3.66725	3.06078e-05	0.0109036
mmu-miR-3473a	3.35088	15.1579	-1.7028	0.0031398	0.029502	NM_133747.2	72722	Cnksr3	transcript	11.3659	7.38682	0.621683	0.00313251	0.049005
mmu-miR-3473a	3.35088	15.1579	-1.7028	0.0031398	0.029502	XM_030252339.2	102634333	Cnksr3	transcript	0	17.8796	#NAME?	2.71143e-06	0.00681592
mmu-miR-3473a	3.35088	15.1579	-1.7028	0.0031398	0.029502	NM_026792.3	52123	Cnksr3	transcript	6.0244	3.29056	0.872483	0.0020744	0.039184
mmu-miR-3473a	3.35088	15.1579	-1.7028	0.0031398	0.029502	XM_006500766.4	18415	Cnksr3	transcript	4.38991	2.19873	0.997525	0.00152571	0.0331249
mmu-miR-3473a	3.35088	15.1579	-1.7028	0.0031398	0.029502	NM_183179.1	240595	Cnksr3	transcript	3.68252	0.490782	2.90754	0.00268645	0.0449153
mmu-miR-3473a	3.35088	15.1579	-1.7028	0.0031398	0.029502	XM_036165700.1	320404	Cnn3	transcript	0	6.46645	#NAME?	0.000252332	0.0125803
mmu-miR-3473a	3.35088	15.1579	-1.7028	0.0031398	0.029502	XM_006520375.5	12419	Cnn3	transcript	0	7.40918	#NAME?	0.000215289	0.0119608
mmu-miR-3473a	3.35088	15.1579	-1.7028	0.0031398	0.029502	NM_028758.2	74105	Cnn3	transcript	8.41225	10.3445	-0.298296	0.000569408	0.0197716
mmu-miR-3473a	3.35088	15.1579	-1.7028	0.0031398	0.029502	NM_012010.3	26905	Cnn3	transcript	23.73	17.4638	0.442349	0.00230633	0.0414115
mmu-miR-3473a	3.35088	15.1579	-1.7028	0.0031398	0.029502	NM_001081236.1	76792	Cnn3	transcript	8.82049	3.09024	1.51314	0.00010701	0.011849
mmu-miR-3473a	3.35088	15.1579	-1.7028	0.0031398	0.029502	NM_001324531.1	19340	Cnot6	transcript	4.60047	5.82791	-0.341197	0.00247029	0.0430463
mmu-miR-3473a	3.35088	15.1579	-1.7028	0.0031398	0.029502	XM_006507189.4	109264	Cnot6	transcript	12.3611	5.99776	1.04331	1.94183e-05	0.00898899
mmu-miR-3473a	3.35088	15.1579	-1.7028	0.0031398	0.029502	NM_178793.4	320924	Cnot6	transcript	4.66364	1.19089	1.96941	0.00195321	0.0377505
mmu-miR-3473a	3.35088	15.1579	-1.7028	0.0031398	0.029502	NM_145562.2	231440	Cnot6	transcript	15.3222	37.5905	-1.29475	0.00249696	0.043351
mmu-miR-3473a	3.35088	15.1579	-1.7028	0.0031398	0.029502	NM_028044.2	71994	Cnot6	transcript	11.3448	15.2168	-0.423636	0.00150492	0.0328508
mmu-miR-3473a	3.35088	15.1579	-1.7028	0.0031398	0.029502	TCONS_00017437	100101806	Cnot6	transcript	0	2.51518	#NAME?	0.000208101	0.011849
mmu-miR-3473a	3.35088	15.1579	-1.7028	0.0031398	0.029502	NM_080636.2	70791	Cnot6	transcript	7.20622	3.47052	1.05409	0.000144405	0.011849
mmu-miR-3473a	3.35088	15.1579	-1.7028	0.0031398	0.029502	NM_198703.3	232341	Cnot6	transcript	33.5824	16.562	1.01983	0.000117898	0.011849
mmu-miR-3473a	3.35088	15.1579	-1.7028	0.0031398	0.029502	NM_021714.4	60321	Cnot6	transcript	11.5157	6.84663	0.750134	0.000104694	0.011849
mmu-miR-3473a	3.35088	15.1579	-1.7028	0.0031398	0.029502	NM_007688.2	12632	Cnot6	transcript	39.698	62.224	-0.648405	0.00142222	0.0320328
mmu-miR-3473a	3.35088	15.1579	-1.7028	0.0031398	0.029502	NM_001081242.2	70549	Cnot6	transcript	0.0245157	2.63951	-6.75042	0.000142942	0.011849
mmu-miR-3473a	3.35088	15.1579	-1.7028	0.0031398	0.029502	TCONS_00007852	59008	Cnot7	transcript	0	3.69736	#NAME?	0.000208101	0.011849
mmu-miR-3473a	3.35088	15.1579	-1.7028	0.0031398	0.029502	NM_009378.3	21824	Cnot7	transcript	25.7737	12.0985	1.09108	0.000318394	0.0142293
mmu-miR-3473a	3.35088	15.1579	-1.7028	0.0031398	0.029502	NM_133783.2	96979	Cnot7	transcript	22.0215	10.3181	1.09373	0.0006923	0.0214613
mmu-miR-3473a	3.35088	15.1579	-1.7028	0.0031398	0.029502	NM_001164172.1	26400	Cnot7	transcript	12.2356	10.1167	0.274339	0.00107807	0.0276308
mmu-miR-3473a	3.35088	15.1579	-1.7028	0.0031398	0.029502	NM_172436.4	78830	Coa5	transcript	67.2218	36.5853	0.877663	0.00153206	0.0331877
mmu-miR-3473a	3.35088	15.1579	-1.7028	0.0031398	0.029502	XM_017320880.3	242894	Coa5	transcript	0.0706213	1.07926	-3.9338	0.000364773	0.0156125
mmu-miR-3473a	3.35088	15.1579	-1.7028	0.0031398	0.029502	XM_036163391.1	76295	Coa5	transcript	0.0414963	1.4673	-5.14403	0.000301881	0.0138406
mmu-miR-3473a	3.35088	15.1579	-1.7028	0.0031398	0.029502	NM_001374779.1	17979	Coa5	transcript	11.6861	6.02368	0.956077	0.00318307	0.0495001
mmu-miR-3473a	3.35088	15.1579	-1.7028	0.0031398	0.029502	XM_006511665.5	20347	Coa5	transcript	0.0735617	2.21499	-4.9122	0.000737048	0.0222639
mmu-miR-3473a	3.35088	15.1579	-1.7028	0.0031398	0.029502	TCONS_00016218	18016	Coa5	transcript	0	3.89182	#NAME?	0.000208101	0.011849
mmu-miR-3473a	3.35088	15.1579	-1.7028	0.0031398	0.029502	NM_197990.3	69399	Coa5	transcript	3.74703	6.52172	-0.799504	0.00161143	0.0338712
mmu-miR-3473a	3.35088	15.1579	-1.7028	0.0031398	0.029502	TCONS_00022839	57261	Coa5	transcript	0.240581	1.86374	-2.9536	0.00196092	0.0378189
mmu-miR-3473a	3.35088	15.1579	-1.7028	0.0031398	0.029502	NM_030225.4	78920	Coa5	transcript	181.845	108.705	0.742289	0.0025797	0.043979
mmu-miR-3473a	3.35088	15.1579	-1.7028	0.0031398	0.029502	XM_030243724.1	80914	Coa5	transcript	0.0461117	2.38203	-5.69092	6.62482e-05	0.011849
mmu-miR-3473a	3.35088	15.1579	-1.7028	0.0031398	0.029502	NM_010217.2	14219	Coa5	transcript	13.8161	47.3045	-1.77562	0.00230935	0.0414133
mmu-miR-3473a	3.35088	15.1579	-1.7028	0.0031398	0.029502	NM_026273.2	67609	Cobl	transcript	15.441	7.97298	0.953576	0.00198299	0.0379124
mmu-miR-3473a	3.35088	15.1579	-1.7028	0.0031398	0.029502	NM_053159.4	94062	Cobl	transcript	44.4713	20.8991	1.08943	1.53811e-06	0.00606699
mmu-miR-3473a	3.35088	15.1579	-1.7028	0.0031398	0.029502	NM_001358359.1	223649	Cobl	transcript	4.18914	9.13984	-1.12551	0.00260867	0.0441014
mmu-miR-3473a	3.35088	15.1579	-1.7028	0.0031398	0.029502	XM_030246557.2	14245	Cobl	transcript	1.81547	3.28901	-0.85731	0.000575053	0.0198218
mmu-miR-3473a	3.35088	15.1579	-1.7028	0.0031398	0.029502	NM_024233.4	104444	Cobl	transcript	25.159	14.9019	0.755578	0.000678559	0.0211743
mmu-miR-3473a	3.35088	15.1579	-1.7028	0.0031398	0.029502	NM_133985.2	108737	Cobl	transcript	1.89358	7.15914	-1.91867	0.00178092	0.0357724
mmu-miR-3473a	3.35088	15.1579	-1.7028	0.0031398	0.029502	NM_144545.4	78655	Cobl	transcript	20.27	12.1274	0.741077	0.000310056	0.0139803
mmu-miR-3473a	3.35088	15.1579	-1.7028	0.0031398	0.029502	NM_001379355.1	68428	Cobl	transcript	5.88743	0.378303	3.96002	0.00176546	0.0355779
mmu-miR-3473a	3.35088	15.1579	-1.7028	0.0031398	0.029502	TCONS_00017886	66266	Cobl	transcript	0	1.29126	#NAME?	0.000208101	0.011849
mmu-miR-3473a	3.35088	15.1579	-1.7028	0.0031398	0.029502	NM_018743.4	102247	Cobl	transcript	13.5676	7.76624	0.804877	0.000326486	0.0144091
mmu-miR-3473a	3.35088	15.1579	-1.7028	0.0031398	0.029502	NM_001357448.1	59057	Cobl	transcript	0.89975	1.66028	-0.883828	0.00145457	0.0324519
mmu-miR-3473a	3.35088	15.1579	-1.7028	0.0031398	0.029502	NM_145491.2	104215	Cobl	transcript	54.4506	24.8375	1.13243	0.00156999	0.0335072
mmu-miR-3473a	3.35088	15.1579	-1.7028	0.0031398	0.029502	XM_011239063.3	227634	Cobl	transcript	0.006683	0.967055	-7.17696	0.000213459	0.0119058
mmu-miR-3473a	3.35088	15.1579	-1.7028	0.0031398	0.029502	TCONS_00005936	242474	Cobl	transcript	1.57062	2.8449	-0.857041	0.000608684	0.0199437
mmu-miR-3473a	3.35088	15.1579	-1.7028	0.0031398	0.029502	NM_001024606.2	382051	Cobl	transcript	14.6334	3.49019	2.06789	0.00110784	0.0280764
mmu-miR-3473a	3.35088	15.1579	-1.7028	0.0031398	0.029502	NM_007798.3	13030	Cobl	transcript	103.575	44.5757	1.21635	0.000581467	0.0198239
mmu-miR-3473a	3.35088	15.1579	-1.7028	0.0031398	0.029502	XM_006527267.5	66866	Cobl	transcript	4.92495	2.38861	1.04394	0.000595022	0.0199437
mmu-miR-3473a	3.35088	15.1579	-1.7028	0.0031398	0.029502	NM_021437.2	58248	Cobl	transcript	3.4821	3.35152	0.0551429	0.00113033	0.0281926
mmu-miR-3473a	3.35088	15.1579	-1.7028	0.0031398	0.029502	TCONS_00024776	54132	Cobl	transcript	0	3.89536	#NAME?	8.32405e-06	0.00809735
mmu-miR-3473a	3.35088	15.1579	-1.7028	0.0031398	0.029502	XM_030248555.2	239555	Cobl	transcript	0	1.40417	#NAME?	0.000208101	0.011849
mmu-miR-3473a	3.35088	15.1579	-1.7028	0.0031398	0.029502	TCONS_00001922	227937	Cobl	transcript	1.80779	2.78593	-0.623933	0.0019647	0.0378189
mmu-miR-3473a	3.35088	15.1579	-1.7028	0.0031398	0.029502	NM_009052.2	19716	Col1a2	transcript	0	9.32657	#NAME?	5.84706e-05	0.011849
mmu-miR-3473a	3.35088	15.1579	-1.7028	0.0031398	0.029502	NM_026518.4	68031	Col1a2	transcript	0.33629	1.86842	-2.47404	0.00023034	0.0120256
mmu-miR-3473a	3.35088	15.1579	-1.7028	0.0031398	0.029502	XM_017317866.3	225131	Col1a2	transcript	0.119621	1.86033	-3.95902	0.00123663	0.0296436
mmu-miR-3473a	3.35088	15.1579	-1.7028	0.0031398	0.029502	XM_011245736.3	72193	Col1a2	transcript	0	1.69055	#NAME?	0.000208101	0.011849
mmu-miR-3473a	3.35088	15.1579	-1.7028	0.0031398	0.029502	NM_019769.3	56398	Col1a2	transcript	41.3744	20.4459	1.01692	0.00319035	0.0495412
mmu-miR-3473a	3.35088	15.1579	-1.7028	0.0031398	0.029502	NM_010332.2	13617	Col4a5	transcript	8.7166	15.9797	-0.874402	0.000353983	0.0151966
mmu-miR-3473a	3.35088	15.1579	-1.7028	0.0031398	0.029502	NM_001110843.1	12293	Col4a5	transcript	5.55837	0	Inf	9.14502e-06	0.00809735
mmu-miR-3473a	3.35088	15.1579	-1.7028	0.0031398	0.029502	NM_001190985.1	14768	Col4a5	transcript	4.04587	1.43319	1.49722	0.00208825	0.0392885
mmu-miR-3473a	3.35088	15.1579	-1.7028	0.0031398	0.029502	TCONS_00017162	11430	Comp	transcript	0.00244233	12.213	-12.2879	0.000197005	0.011849
mmu-miR-3473a	3.35088	15.1579	-1.7028	0.0031398	0.029502	TCONS_00021414	56637	Comp	transcript	0	3.22604	#NAME?	0.000208101	0.011849
mmu-miR-3473a	3.35088	15.1579	-1.7028	0.0031398	0.029502	TCONS_00008676	14794	Comp	transcript	0	7.7085	#NAME?	0.000976226	0.0262643
mmu-miR-3473a	3.35088	15.1579	-1.7028	0.0031398	0.029502	TCONS_00020139	16880	Comp	transcript	0	1.30271	#NAME?	0.000208101	0.011849
mmu-miR-3473a	3.35088	15.1579	-1.7028	0.0031398	0.029502	NM_009779.2	12267	Coq10a	transcript	3.10675	0.748602	2.05314	0.00198156	0.0379124
mmu-miR-3473a	3.35088	15.1579	-1.7028	0.0031398	0.029502	XM_011241067.2	320609	Coq10a	transcript	0.341589	2.13166	-2.64164	0.000149829	0.011849
mmu-miR-3473a	3.35088	15.1579	-1.7028	0.0031398	0.029502	NM_011838.4	23936	Coq5	transcript	70.7077	25.7672	1.45633	0.000325774	0.0144091
mmu-miR-3473a	3.35088	15.1579	-1.7028	0.0031398	0.029502	NM_001370902.1	665700	Coq5	transcript	7.60778	1.38907	2.45336	3.91995e-05	0.0115968
mmu-miR-3473a	3.35088	15.1579	-1.7028	0.0031398	0.029502	XM_036163810.1	18027	Coq5	transcript	0	1.75944	#NAME?	0.00117499	0.0288995
mmu-miR-3473a	3.35088	15.1579	-1.7028	0.0031398	0.029502	NM_133887.4	100226	Coq5	transcript	18.1157	17.7267	0.0313165	0.00297755	0.047773
mmu-miR-3473a	3.35088	15.1579	-1.7028	0.0031398	0.029502	XM_011245449.1	140570	Coq5	transcript	0.000823	4.30942	-12.3543	0.00025308	0.0125803
mmu-miR-3473a	3.35088	15.1579	-1.7028	0.0031398	0.029502	NM_010260.1	14469	Coq5	transcript	11.0655	2.3896	2.21123	0.00106173	0.0274983
mmu-miR-3473a	3.35088	15.1579	-1.7028	0.0031398	0.029502	NM_172694.2	230316	Coq5	transcript	8.61234	3.69976	1.21897	0.00144528	0.0322955
mmu-miR-3473a	3.35088	15.1579	-1.7028	0.0031398	0.029502	NM_001013024.2	72607	Coq5	transcript	60.8719	43.9871	0.468694	0.00218064	0.0401731
mmu-miR-3473a	3.35088	15.1579	-1.7028	0.0031398	0.029502	XM_011238527.4	269198	Coq5	transcript	0.130446	1.37408	-3.39694	0.00227693	0.041197
mmu-miR-3473a	3.35088	15.1579	-1.7028	0.0031398	0.029502	TCONS_00018638	20191	Coq9	transcript	46.8941	17.9574	1.38483	0.0015578	0.0335072
mmu-miR-3473a	3.35088	15.1579	-1.7028	0.0031398	0.029502	NM_001205076.1	59091	Coq9	transcript	0.74834	2.54809	-1.76765	0.000966321	0.0262258
mmu-miR-3473a	3.35088	15.1579	-1.7028	0.0031398	0.029502	XM_036156352.1	16562	Coq9	transcript	0.49659	3.61725	-2.86477	0.0016394	0.0341585
mmu-miR-3473a	3.35088	15.1579	-1.7028	0.0031398	0.029502	XM_030253140.2	12540	Cpe	transcript	3.26466	0	Inf	0.00129193	0.0301528
mmu-miR-3473a	3.35088	15.1579	-1.7028	0.0031398	0.029502	TCONS_00007881	56430	Cpt2	transcript	0.532009	2.12216	-1.99601	0.00045144	0.0172853
mmu-miR-3473a	3.35088	15.1579	-1.7028	0.0031398	0.029502	NM_001163170.1	280411	Cpt2	transcript	9.71146	14.5859	-0.586815	0.000860279	0.0246712
mmu-miR-3473a	3.35088	15.1579	-1.7028	0.0031398	0.029502	NM_025557.1	66425	Crhr2	transcript	49.4431	16.3196	1.59917	7.99887e-05	0.011849
mmu-miR-3473a	3.35088	15.1579	-1.7028	0.0031398	0.029502	NM_009088.3	20019	Crhr2	transcript	11.1603	5.17423	1.10897	4.63453e-05	0.011849
mmu-miR-3473a	3.35088	15.1579	-1.7028	0.0031398	0.029502	NM_001287386.1	103988	Crhr2	transcript	17.4584	0.702027	4.63625	0.000803333	0.0235141
mmu-miR-3473a	3.35088	15.1579	-1.7028	0.0031398	0.029502	NM_145991.2	214498	Crhr2	transcript	0.353721	3.55633	-3.32971	0.000125934	0.011849
mmu-miR-3473a	3.35088	15.1579	-1.7028	0.0031398	0.029502	NM_009425.2	22035	Crtap	transcript	5.83158	2.24147	1.37944	0.000523065	0.0189037
mmu-miR-3473a	3.35088	15.1579	-1.7028	0.0031398	0.029502	NM_028105.4	72113	Crtap	transcript	3.00601	0.750733	2.00148	0.00286836	0.0468157
mmu-miR-3473a	3.35088	15.1579	-1.7028	0.0031398	0.029502	NM_011506.4	20916	Crybb1	transcript	157.724	91.8855	0.779498	0.00245287	0.0427953
mmu-miR-3473a	3.35088	15.1579	-1.7028	0.0031398	0.029502	XM_006534391.5	75580	Crybb1	transcript	0	1.27003	#NAME?	0.000208101	0.011849
mmu-miR-3473a	3.35088	15.1579	-1.7028	0.0031398	0.029502	XM_006531612.4	104401	Csf1r	transcript	0.463429	1.98441	-2.09829	0.00238941	0.0423663
mmu-miR-3473a	3.35088	15.1579	-1.7028	0.0031398	0.029502	NM_001010836.3	333654	Csf1r	transcript	3.60128	14.5252	-2.01198	0.00259924	0.0441014
mmu-miR-3473a	3.35088	15.1579	-1.7028	0.0031398	0.029502	NM_176933.4	319520	Csf1r	transcript	0.745019	2.95323	-1.98694	7.6233e-05	0.011849
mmu-miR-3473a	3.35088	15.1579	-1.7028	0.0031398	0.029502	NM_001360151.1	93692	Csf1r	transcript	3.38262	0.127893	4.72513	0.000270364	0.0130281
mmu-miR-3473a	3.35088	15.1579	-1.7028	0.0031398	0.029502	XM_006516668.5	238564	Csf1r	transcript	51.8504	20.0108	1.37358	0.0016558	0.0342949
mmu-miR-3473a	3.35088	15.1579	-1.7028	0.0031398	0.029502	NM_008681.2	17988	Csf1r	transcript	8.39281	13.4879	-0.684435	0.000598646	0.0199437
mmu-miR-3473a	3.35088	15.1579	-1.7028	0.0031398	0.029502	XM_006518778.1	211922	Csf1r	transcript	0.021746	0.97065	-5.48013	0.00024897	0.0125076
mmu-miR-3473a	3.35088	15.1579	-1.7028	0.0031398	0.029502	NM_007982.2	14083	Csf1r	transcript	0.671203	2.17258	-1.69458	0.00163597	0.0341585
mmu-miR-3473a	3.35088	15.1579	-1.7028	0.0031398	0.029502	TCONS_00009768	78286	Csnk1g1	transcript	5.80375	0.092506	5.9713	0.000875541	0.0248661
mmu-miR-3473a	3.35088	15.1579	-1.7028	0.0031398	0.029502	NM_008850.2	18738	Csnk1g1	transcript	12.0584	1.04784	3.52454	0.00240233	0.0424412
mmu-miR-3473a	3.35088	15.1579	-1.7028	0.0031398	0.029502	NM_001253831.1	235574	Csnk1g1	transcript	3.79038	10.4862	-1.46807	6.86311e-05	0.011849
mmu-miR-3473a	3.35088	15.1579	-1.7028	0.0031398	0.029502	NM_177694.6	233246	Csnk1g1	transcript	3.85376	0.082852	5.53959	0.000507885	0.0186404
mmu-miR-3473a	3.35088	15.1579	-1.7028	0.0031398	0.029502	NM_011923.4	26360	Csnk1g1	transcript	28.8622	7.796	1.88838	0.000246813	0.0124434
mmu-miR-3473a	3.35088	15.1579	-1.7028	0.0031398	0.029502	NM_001012477.2	20315	Csnk1g1	transcript	41.9226	8.72303	2.26483	0.00250906	0.0434547
mmu-miR-3473a	3.35088	15.1579	-1.7028	0.0031398	0.029502	XM_036158471.1	15460	Csnk1g1	transcript	9.9772	0	Inf	0.000540643	0.0191482
mmu-miR-3473a	3.35088	15.1579	-1.7028	0.0031398	0.029502	NM_001142957.1	100043468	Csnk1g1	transcript	6.14218	3.75226	0.71099	0.00229483	0.0413623
mmu-miR-3473a	3.35088	15.1579	-1.7028	0.0031398	0.029502	NM_001253757.1	66471	Csnk1g1	transcript	1.50649	1.72974	-0.199368	0.00129997	0.0302409
mmu-miR-3473a	3.35088	15.1579	-1.7028	0.0031398	0.029502	NM_023908.2	108116	Csnk1g1	transcript	17.9173	6.81677	1.39419	4.78882e-05	0.011849
mmu-miR-3473a	3.35088	15.1579	-1.7028	0.0031398	0.029502	NM_001362456.1	16509	Csnk1g1	transcript	0.083644	4.13095	-5.62607	0.00052909	0.0190728
mmu-miR-3473a	3.35088	15.1579	-1.7028	0.0031398	0.029502	NM_025613.3	58521	Csnk1g1	transcript	10.5072	13.6496	-0.377482	0.000161489	0.011849
mmu-miR-3473a	3.35088	15.1579	-1.7028	0.0031398	0.029502	NM_001171000.2	74340	Csnk1g1	transcript	5.19366	5.65173	-0.12194	0.00149626	0.0328408
mmu-miR-3473a	3.35088	15.1579	-1.7028	0.0031398	0.029502	XM_030250546.2	56386	Csnk1g1	transcript	0.00943533	1.70533	-7.49777	0.000179154	0.011849
mmu-miR-3473a	3.35088	15.1579	-1.7028	0.0031398	0.029502	NM_019581.3	56055	Csnk1g1	transcript	0.704575	3.06818	-2.12256	0.000137375	0.011849
mmu-miR-3473a	3.35088	15.1579	-1.7028	0.0031398	0.029502	NM_199029.2	380912	Csnk1g1	transcript	0.873976	4.10068	-2.2302	8.95514e-05	0.011849
mmu-miR-3473a	3.35088	15.1579	-1.7028	0.0031398	0.029502	NM_130892.5	170728	Csnk1g1	transcript	25.5225	13.9311	0.87346	0.00255076	0.0436594
mmu-miR-3473a	3.35088	15.1579	-1.7028	0.0031398	0.029502	NM_011851.4	23959	Cst3	transcript	5.20463	1.58298	1.71715	0.00210315	0.0393487
mmu-miR-3473a	3.35088	15.1579	-1.7028	0.0031398	0.029502	TCONS_00015404	72947	Ctdnep1	transcript	0.112385	1.99484	-4.14975	0.000153106	0.011849
mmu-miR-3473a	3.35088	15.1579	-1.7028	0.0031398	0.029502	XM_006516544.4	140580	Ctnna1	transcript	0	0.964251	#NAME?	0.000208101	0.011849
mmu-miR-3473a	3.35088	15.1579	-1.7028	0.0031398	0.029502	TCONS_00023188	20541	Ctnna1	transcript	20.6975	50.4304	-1.28484	0.00253048	0.0436594
mmu-miR-3473a	3.35088	15.1579	-1.7028	0.0031398	0.029502	NM_198006.4	76178	Ctnna1	transcript	50.2161	22.0338	1.18843	0.00112898	0.0281926
mmu-miR-3473a	3.35088	15.1579	-1.7028	0.0031398	0.029502	NM_033322.3	93730	Ctnna1	transcript	0.252209	1.35882	-2.42966	0.000922965	0.0256889
mmu-miR-3473a	3.35088	15.1579	-1.7028	0.0031398	0.029502	NM_026490.2	56284	Ctnna1	transcript	5.12255	3.13969	0.70624	0.00202573	0.0385216
mmu-miR-3473a	3.35088	15.1579	-1.7028	0.0031398	0.029502	NM_178045.4	213391	Ctnna1	transcript	2.94432	0.459439	2.67999	0.00253891	0.0436594
mmu-miR-3473a	3.35088	15.1579	-1.7028	0.0031398	0.029502	NM_019922.2	56693	Ctnna1	transcript	7.09982	8.67428	-0.28896	0.00192836	0.0375518
mmu-miR-3473a	3.35088	15.1579	-1.7028	0.0031398	0.029502	NM_011130.2	18970	Ctnna1	transcript	0.106074	7.27437	-6.09968	0.000143192	0.011849
mmu-miR-3473a	3.35088	15.1579	-1.7028	0.0031398	0.029502	XM_036165926.1	18575	Ctsb	transcript	0.00292067	2.25441	-9.59223	0.000224915	0.0120256
mmu-miR-3473a	3.35088	15.1579	-1.7028	0.0031398	0.029502	NM_016957.3	15331	Ctsb	transcript	0.000283	1.33388	-12.2025	0.00019752	0.011849
mmu-miR-3473a	3.35088	15.1579	-1.7028	0.0031398	0.029502	NM_026192.3	67488	Ctsb	transcript	24.0407	36.1119	-0.586996	0.00100726	0.0267227
mmu-miR-3473a	3.35088	15.1579	-1.7028	0.0031398	0.029502	NM_025969.5	67105	Ctsb	transcript	8.47727	5.53537	0.614919	0.000612857	0.0200054
mmu-miR-3473a	3.35088	15.1579	-1.7028	0.0031398	0.029502	NM_027402.4	384061	Ctsb	transcript	93.0837	43.0236	1.1134	1.16982e-05	0.00898899
mmu-miR-3473a	3.35088	15.1579	-1.7028	0.0031398	0.029502	TCONS_00014197	11735	Ctsb	transcript	4.56823	0.932611	2.29229	0.00112965	0.0281926
mmu-miR-3473a	3.35088	15.1579	-1.7028	0.0031398	0.029502	NM_001286641.1	330941	Ctsb	transcript	0	2.28586	#NAME?	8.04807e-05	0.011849
mmu-miR-3473a	3.35088	15.1579	-1.7028	0.0031398	0.029502	TCONS_00000331	347722	Ctsb	transcript	0.0155523	1.00315	-6.01126	0.000242995	0.0123388
mmu-miR-3473a	3.35088	15.1579	-1.7028	0.0031398	0.029502	XM_036162750.1	99031	Ctsb	transcript	4.28989	0.538524	2.99386	0.000131777	0.011849
mmu-miR-3473a	3.35088	15.1579	-1.7028	0.0031398	0.029502	NM_017379.2	53857	Ctsb	transcript	70.4804	12.6205	2.48145	0.000448733	0.017275
mmu-miR-3473a	3.35088	15.1579	-1.7028	0.0031398	0.029502	NM_001361966.1	73998	Ctsb	transcript	3.55004	1.71795	1.04715	0.00105024	0.027401
mmu-miR-3473a	3.35088	15.1579	-1.7028	0.0031398	0.029502	NM_001169577.1	22214	Ctsb	transcript	0.0879423	1.41218	-4.00523	0.000335305	0.0146524
mmu-miR-3473a	3.35088	15.1579	-1.7028	0.0031398	0.029502	NM_010101.4	13610	Ctsb	transcript	6.62156	3.85762	0.779461	0.0016731	0.034352
mmu-miR-3473a	3.35088	15.1579	-1.7028	0.0031398	0.029502	NM_010110.5	13641	Ctsb	transcript	7.36754	4.9256	0.580884	0.00217985	0.0401731
mmu-miR-3473a	3.35088	15.1579	-1.7028	0.0031398	0.029502	NM_001361568.1	276952	Ctsb	transcript	26.0065	13.8672	0.907191	0.0027091	0.0450388
mmu-miR-3473a	3.35088	15.1579	-1.7028	0.0031398	0.029502	TCONS_00023091	16549	Ctsb	transcript	0	3.0906	#NAME?	0.000208101	0.011849
mmu-miR-3473a	3.35088	15.1579	-1.7028	0.0031398	0.029502	XM_030248280.2	11512	Ctsb	transcript	0.0235687	1.77038	-6.23104	0.000785551	0.0231852
mmu-miR-3473a	3.35088	15.1579	-1.7028	0.0031398	0.029502	XM_006518767.2	210789	Cttnbp2nl	transcript	12.8952	8.19921	0.65328	0.000836928	0.0241975
mmu-miR-3473a	3.35088	15.1579	-1.7028	0.0031398	0.029502	NM_009565.5	22724	Cttnbp2nl	transcript	4.12497	2.16341	0.931079	0.00148296	0.0328266
mmu-miR-3473a	3.35088	15.1579	-1.7028	0.0031398	0.029502	TCONS_00016414	104625	Cttnbp2nl	transcript	0	2.84629	#NAME?	0.000208101	0.011849
mmu-miR-3473a	3.35088	15.1579	-1.7028	0.0031398	0.029502	XM_006505871.4	21366	Cttnbp2nl	transcript	0	11.8486	#NAME?	0.000348779	0.0150187
mmu-miR-3473a	3.35088	15.1579	-1.7028	0.0031398	0.029502	NM_001355651.1	74182	Cttnbp2nl	transcript	0.196427	1.98661	-3.33825	3.46341e-05	0.0109036
mmu-miR-30e-3p	6042.92	2630.79	1.151	2.9789e-05	0.00071151	XM_011245735.2	71919	Cttnbp2nl	transcript	0.0662103	1.75448	-4.72784	0.000969008	0.0262404
mmu-miR-30e-3p	6042.92	2630.79	1.151	2.9789e-05	0.00071151	NM_145991.2	214498	Cttnbp2nl	transcript	0.353721	3.55633	-3.32971	0.000125934	0.011849
mmu-miR-30e-3p	6042.92	2630.79	1.151	2.9789e-05	0.00071151	NM_001359172.1	20817	Cttnbp2nl	transcript	0.0243827	1.83794	-6.23609	0.00101558	0.0268837
mmu-miR-30e-3p	6042.92	2630.79	1.151	2.9789e-05	0.00071151	TCONS_00001279	226432	Cttnbp2nl	transcript	5.41465	0.03601	7.23233	0.00192567	0.0375518
mmu-miR-30e-3p	6042.92	2630.79	1.151	2.9789e-05	0.00071151	NM_009088.3	20019	Cttnbp2nl	transcript	11.1603	5.17423	1.10897	4.63453e-05	0.011849
mmu-miR-30e-3p	6042.92	2630.79	1.151	2.9789e-05	0.00071151	NM_001033228.3	109700	Cttnbp2nl	transcript	18.5636	8.06813	1.20217	0.00297749	0.047773
mmu-miR-30e-3p	6042.92	2630.79	1.151	2.9789e-05	0.00071151	NM_026742.4	68493	Cul5	transcript	19.9983	10.1295	0.981313	0.00129411	0.0301541
mmu-miR-30e-3p	6042.92	2630.79	1.151	2.9789e-05	0.00071151	TCONS_00016035	70207	Cul5	transcript	11.0295	4.75621	1.21348	0.000540072	0.0191482
mmu-miR-30e-3p	6042.92	2630.79	1.151	2.9789e-05	0.00071151	XM_006535263.4	74596	Cul5	transcript	3.53851	0.952123	1.89392	3.87076e-05	0.0115968
mmu-miR-30e-3p	6042.92	2630.79	1.151	2.9789e-05	0.00071151	NM_027756.5	71306	Cul5	transcript	5.56108	1.24104	2.16381	0.000430438	0.016892
mmu-miR-30e-3p	6042.92	2630.79	1.151	2.9789e-05	0.00071151	NM_011436.4	20660	Cul5	transcript	2.80025	0.980742	1.51361	0.000432615	0.0168945
mmu-miR-30e-3p	6042.92	2630.79	1.151	2.9789e-05	0.00071151	TCONS_00017959	53612	Cul5	transcript	0	1.97266	#NAME?	0.000208101	0.011849
mmu-miR-30e-3p	6042.92	2630.79	1.151	2.9789e-05	0.00071151	NM_145401.2	108099	Cul5	transcript	3.05641	0.26636	3.52039	0.000663898	0.0209475
mmu-miR-30e-3p	6042.92	2630.79	1.151	2.9789e-05	0.00071151	NM_025616.3	66525	Cul5	transcript	24.91	15.1509	0.717323	0.00140422	0.0317282
mmu-miR-30e-3p	6042.92	2630.79	1.151	2.9789e-05	0.00071151	NM_175515.5	380614	Cul5	transcript	11.9469	1.45884	3.03374	0.000100087	0.011849
mmu-miR-30e-3p	6042.92	2630.79	1.151	2.9789e-05	0.00071151	NM_008681.2	17988	Cul5	transcript	8.39281	13.4879	-0.684435	0.000598646	0.0199437
mmu-miR-30e-3p	6042.92	2630.79	1.151	2.9789e-05	0.00071151	NM_001033302.2	229599	Cul5	transcript	1.04408	7.10401	-2.7664	0.000662894	0.0209475
mmu-miR-30e-3p	6042.92	2630.79	1.151	2.9789e-05	0.00071151	NM_026302.4	67665	Cul5	transcript	9.83586	11.1804	-0.184853	0.00319621	0.0495412
mmu-miR-30e-3p	6042.92	2630.79	1.151	2.9789e-05	0.00071151	XM_006500766.4	18415	Cul5	transcript	4.38991	2.19873	0.997525	0.00152571	0.0331249
mmu-miR-30e-3p	6042.92	2630.79	1.151	2.9789e-05	0.00071151	XM_011239446.4	228026	Cul5	transcript	0	3.2763	#NAME?	0.000208101	0.011849
mmu-miR-30e-3p	6042.92	2630.79	1.151	2.9789e-05	0.00071151	NM_018826.2	54352	Cul5	transcript	2.4157	5.55823	-1.20219	0.00127264	0.0300492
mmu-miR-30e-3p	6042.92	2630.79	1.151	2.9789e-05	0.00071151	NM_028758.2	74105	Cul5	transcript	8.41225	10.3445	-0.298296	0.000569408	0.0197716
mmu-miR-30e-3p	6042.92	2630.79	1.151	2.9789e-05	0.00071151	TCONS_00009768	78286	Cul5	transcript	5.80375	0.092506	5.9713	0.000875541	0.0248661
mmu-miR-30e-3p	6042.92	2630.79	1.151	2.9789e-05	0.00071151	NM_001081236.1	76792	Cxcl12	transcript	8.82049	3.09024	1.51314	0.00010701	0.011849
mmu-miR-30e-3p	6042.92	2630.79	1.151	2.9789e-05	0.00071151	NM_001253831.1	235574	Cxcl12	transcript	3.79038	10.4862	-1.46807	6.86311e-05	0.011849
mmu-miR-30e-3p	6042.92	2630.79	1.151	2.9789e-05	0.00071151	XM_006507189.4	109264	Cxcl12	transcript	12.3611	5.99776	1.04331	1.94183e-05	0.00898899
mmu-miR-30e-3p	6042.92	2630.79	1.151	2.9789e-05	0.00071151	TCONS_00008140	12843	Cxcl12	transcript	0	2.86225	#NAME?	0.000208101	0.011849
mmu-miR-30e-3p	6042.92	2630.79	1.151	2.9789e-05	0.00071151	NM_020332.4	11732	Cxcl12	transcript	88.2638	34.408	1.35908	0.000273401	0.0130854
mmu-miR-30e-3p	6042.92	2630.79	1.151	2.9789e-05	0.00071151	NM_001033634.3	414872	Cxcl12	transcript	24.65	7.93958	1.63445	0.00064772	0.0206452
mmu-miR-30e-3p	6042.92	2630.79	1.151	2.9789e-05	0.00071151	NM_001110843.1	12293	Cxcl12	transcript	5.55837	0	Inf	9.14502e-06	0.00809735
mmu-miR-30e-3p	6042.92	2630.79	1.151	2.9789e-05	0.00071151	NM_022032.4	64058	Cxcl12	transcript	44.0267	119.731	-1.44335	0.000167795	0.011849
mmu-miR-30e-3p	6042.92	2630.79	1.151	2.9789e-05	0.00071151	XM_017317866.3	225131	Cxcl12	transcript	0.119621	1.86033	-3.95902	0.00123663	0.0296436
mmu-miR-30e-3p	6042.92	2630.79	1.151	2.9789e-05	0.00071151	NM_001374656.1	330938	Cxcl12	transcript	0.09835	4.32228	-5.45772	0.000928627	0.025695
mmu-miR-30e-3p	6042.92	2630.79	1.151	2.9789e-05	0.00071151	NM_145614.4	235339	Cxcl12	transcript	124.04	58.5743	1.08247	3.92918e-05	0.0115968
mmu-miR-30e-3p	6042.92	2630.79	1.151	2.9789e-05	0.00071151	TCONS_00024215	353211	Cxcl12	transcript	3.50495	1.28129	1.45179	0.00236797	0.0420917
mmu-miR-30e-3p	6042.92	2630.79	1.151	2.9789e-05	0.00071151	XM_006527268.4	66980	Cxcl12	transcript	7.12351	2.22921	1.67606	0.000398742	0.0162795
mmu-miR-30e-3p	6042.92	2630.79	1.151	2.9789e-05	0.00071151	TCONS_00020139	16880	Cxcl12	transcript	0	1.30271	#NAME?	0.000208101	0.011849
mmu-miR-30e-3p	6042.92	2630.79	1.151	2.9789e-05	0.00071151	NM_078477.2	118445	Cxcl12	transcript	1.14929	2.82258	-1.29627	0.0032587	0.0499953
mmu-miR-30e-3p	6042.92	2630.79	1.151	2.9789e-05	0.00071151	XM_011241067.2	320609	Cxcl12	transcript	0.341589	2.13166	-2.64164	0.000149829	0.011849
mmu-miR-30e-3p	6042.92	2630.79	1.151	2.9789e-05	0.00071151	XM_030245515.2	12808	Cxcl12	transcript	0	1.22489	#NAME?	0.000151503	0.011849
mmu-miR-30e-3p	6042.92	2630.79	1.151	2.9789e-05	0.00071151	NM_027799.2	71452	Cxcl12	transcript	42.3705	26.0621	0.701108	0.000397916	0.0162795
mmu-miR-30e-3p	6042.92	2630.79	1.151	2.9789e-05	0.00071151	TCONS_00013489	75717	Cxcl12	transcript	0.00558833	1.23235	-7.78477	0.000152409	0.011849
mmu-miR-30e-3p	6042.92	2630.79	1.151	2.9789e-05	0.00071151	NM_173866.4	108682	Cxcl12	transcript	15.5947	1.46859	3.40854	0.000996956	0.0266488
mmu-miR-30e-3p	6042.92	2630.79	1.151	2.9789e-05	0.00071151	TCONS_00012709	80288	Cxcl12	transcript	0.156424	1.94385	-3.63538	0.000218389	0.0119919
mmu-miR-30e-3p	6042.92	2630.79	1.151	2.9789e-05	0.00071151	NM_138751.2	192216	Cxcl12	transcript	3.10698	7.04139	-1.18035	0.00228669	0.0412725
mmu-miR-30e-3p	6042.92	2630.79	1.151	2.9789e-05	0.00071151	NM_178357.3	194655	Cxcl14	transcript	3.65517	5.69257	-0.639141	0.00181779	0.0363209
mmu-miR-30e-3p	6042.92	2630.79	1.151	2.9789e-05	0.00071151	NM_010771.6	17184	Cxcl14	transcript	26.9851	29.161	-0.111874	0.000439264	0.0170029
mmu-miR-30e-3p	6042.92	2630.79	1.151	2.9789e-05	0.00071151	NM_011207.2	545622	Cxcl14	transcript	0.0298263	2.85143	-6.57895	5.67792e-05	0.011849
mmu-miR-30e-3p	6042.92	2630.79	1.151	2.9789e-05	0.00071151	XM_036163810.1	18027	Cxcl14	transcript	0	1.75944	#NAME?	0.00117499	0.0288995
mmu-miR-30e-3p	6042.92	2630.79	1.151	2.9789e-05	0.00071151	NM_001359858.1	66923	Cxcl16	transcript	0	1.00614	#NAME?	0.000208101	0.011849
mmu-miR-30e-3p	6042.92	2630.79	1.151	2.9789e-05	0.00071151	NM_018779.2	54611	Cxcl16	transcript	9.7464	25.8013	-1.4045	0.000703119	0.0216341
mmu-miR-30e-3p	6042.92	2630.79	1.151	2.9789e-05	0.00071151	TCONS_00007657	12492	Cxcl16	transcript	1.09006	8.33987	-2.93561	0.000503473	0.0185619
mmu-miR-30e-3p	6042.92	2630.79	1.151	2.9789e-05	0.00071151	XM_011238527.4	269198	Cxcl16	transcript	0.130446	1.37408	-3.39694	0.00227693	0.041197
mmu-miR-30e-3p	6042.92	2630.79	1.151	2.9789e-05	0.00071151	NM_025575.3	66460	Cxcl16	transcript	10.3227	6.93644	0.573558	0.00161444	0.0338841
mmu-miR-30e-3p	6042.92	2630.79	1.151	2.9789e-05	0.00071151	NM_001368720.1	67933	Cxcl16	transcript	5.43663	5.40261	0.00905504	0.00188526	0.0369923
mmu-miR-30e-3p	6042.92	2630.79	1.151	2.9789e-05	0.00071151	XM_036161518.1	22359	Cxcl16	transcript	43.687	2.02854	4.42869	3.29608e-05	0.0109036
mmu-miR-30e-3p	6042.92	2630.79	1.151	2.9789e-05	0.00071151	TCONS_00007881	56430	Cyc1	transcript	0.532009	2.12216	-1.99601	0.00045144	0.0172853
mmu-miR-30e-3p	6042.92	2630.79	1.151	2.9789e-05	0.00071151	NM_020496.3	57246	Cyc1	transcript	0.561424	1.58799	-1.50004	0.000600662	0.0199437
mmu-miR-30e-3p	6042.92	2630.79	1.151	2.9789e-05	0.00071151	NM_053159.4	94062	Cyfip1	transcript	44.4713	20.8991	1.08943	1.53811e-06	0.00606699
mmu-miR-30e-3p	6042.92	2630.79	1.151	2.9789e-05	0.00071151	NM_172546.2	215748	Cyfip1	transcript	6.00892	10.7471	-0.838771	0.00240561	0.0424412
mmu-miR-30e-3p	6042.92	2630.79	1.151	2.9789e-05	0.00071151	XM_006507470.5	19647	Cyfip1	transcript	4.54464	4.46107	0.0267746	0.0020459	0.0388008
mmu-miR-30e-3p	6042.92	2630.79	1.151	2.9789e-05	0.00071151	NM_001379355.1	68428	Cyfip1	transcript	5.88743	0.378303	3.96002	0.00176546	0.0355779
mmu-miR-30e-3p	6042.92	2630.79	1.151	2.9789e-05	0.00071151	TCONS_00014197	11735	Cyfip1	transcript	4.56823	0.932611	2.29229	0.00112965	0.0281926
mmu-miR-30e-3p	6042.92	2630.79	1.151	2.9789e-05	0.00071151	TCONS_00001310	12628	Cyfip1	transcript	0.104025	5.00249	-5.58765	3.08487e-05	0.0109036
mmu-miR-30e-3p	6042.92	2630.79	1.151	2.9789e-05	0.00071151	NM_024197.1	67273	Cyth2	transcript	263.583	173.573	0.602715	0.00152683	0.0331249
mmu-miR-30e-3p	6042.92	2630.79	1.151	2.9789e-05	0.00071151	NM_001286641.1	330941	Cyth2	transcript	0	2.28586	#NAME?	8.04807e-05	0.011849
mmu-miR-30e-3p	6042.92	2630.79	1.151	2.9789e-05	0.00071151	NM_138651.7	110911	Cyth2	transcript	29.7644	31.9439	-0.101955	0.00102009	0.0269116
mmu-miR-30e-3p	6042.92	2630.79	1.151	2.9789e-05	0.00071151	XM_017322067.3	20430	Cyth2	transcript	3.29969	1.2055	1.4527	0.000438051	0.0170029
mmu-miR-30e-3p	6042.92	2630.79	1.151	2.9789e-05	0.00071151	NM_027402.4	384061	Cyth2	transcript	93.0837	43.0236	1.1134	1.16982e-05	0.00898899
mmu-miR-30e-3p	6042.92	2630.79	1.151	2.9789e-05	0.00071151	NM_080708.1	140780	Cyth2	transcript	3.11057	1.31645	1.24053	0.000700149	0.0216299
mmu-miR-30e-3p	6042.92	2630.79	1.151	2.9789e-05	0.00071151	NM_018743.4	102247	Cyth2	transcript	13.5676	7.76624	0.804877	0.000326486	0.0144091
mmu-miR-30e-3p	6042.92	2630.79	1.151	2.9789e-05	0.00071151	XM_036162750.1	99031	Cyth2	transcript	4.28989	0.538524	2.99386	0.000131777	0.011849
mmu-miR-30e-3p	6042.92	2630.79	1.151	2.9789e-05	0.00071151	NM_010324.2	14718	Cyth2	transcript	326.78	192.111	0.766377	0.000672183	0.0210682
mmu-miR-30e-3p	6042.92	2630.79	1.151	2.9789e-05	0.00071151	XM_036161263.1	67869	Dctn4	transcript	0	4.11472	#NAME?	0.000208101	0.011849
mmu-miR-30e-3p	6042.92	2630.79	1.151	2.9789e-05	0.00071151	TCONS_00000331	347722	Dctn4	transcript	0.0155523	1.00315	-6.01126	0.000242995	0.0123388
mmu-miR-30e-3p	6042.92	2630.79	1.151	2.9789e-05	0.00071151	TCONS_00005936	242474	Dctn4	transcript	1.57062	2.8449	-0.857041	0.000608684	0.0199437
mmu-miR-30e-3p	6042.92	2630.79	1.151	2.9789e-05	0.00071151	NM_001024606.2	382051	Dctn4	transcript	14.6334	3.49019	2.06789	0.00110784	0.0280764
mmu-miR-30e-3p	6042.92	2630.79	1.151	2.9789e-05	0.00071151	NM_008444.4	16569	Dctn4	transcript	3.70473	1.55262	1.25466	0.000617896	0.0200774
mmu-miR-30e-3p	6042.92	2630.79	1.151	2.9789e-05	0.00071151	NM_011782.2	23794	Dctn4	transcript	7.2282	4.15903	0.79739	0.0015713	0.0335072
mmu-miR-30e-3p	6042.92	2630.79	1.151	2.9789e-05	0.00071151	XM_036156645.1	22720	Dctn4	transcript	0	3.07226	#NAME?	0.00215554	0.0399705
mmu-miR-30e-3p	6042.92	2630.79	1.151	2.9789e-05	0.00071151	TCONS_00023739	76594	Dctn4	transcript	0	1.93372	#NAME?	0.000208101	0.011849
mmu-miR-30e-3p	6042.92	2630.79	1.151	2.9789e-05	0.00071151	TCONS_00013940	17281	Dctn4	transcript	0	4.89149	#NAME?	0.000208101	0.011849
mmu-miR-30e-3p	6042.92	2630.79	1.151	2.9789e-05	0.00071151	NM_001025572.1	106585	Dctn4	transcript	2.84917	4.56201	-0.67913	0.0027118	0.0450388
mmu-miR-30e-3p	6042.92	2630.79	1.151	2.9789e-05	0.00071151	NM_013657.5	20348	Dctn4	transcript	7.1266	2.30536	1.62822	0.00158434	0.0336513
mmu-miR-30e-3p	6042.92	2630.79	1.151	2.9789e-05	0.00071151	NM_001159564.1	16420	Dctn4	transcript	7.27284	0.301014	4.59462	0.000133564	0.011849
mmu-miR-30e-3p	6042.92	2630.79	1.151	2.9789e-05	0.00071151	XM_006527267.5	66866	Dctn4	transcript	4.92495	2.38861	1.04394	0.000595022	0.0199437
mmu-miR-30e-3p	6042.92	2630.79	1.151	2.9789e-05	0.00071151	NM_023579.4	70572	Dctn4	transcript	39.767	46.46	-0.224417	0.00132677	0.0307634
mmu-miR-30e-3p	6042.92	2630.79	1.151	2.9789e-05	0.00071151	TCONS_00001922	227937	Dctn4	transcript	1.80779	2.78593	-0.623933	0.0019647	0.0378189
mmu-miR-30e-3p	6042.92	2630.79	1.151	2.9789e-05	0.00071151	NM_172513.3	213056	Dctn4	transcript	2.78856	1.04984	1.40935	0.00125155	0.0297996
mmu-miR-30e-3p	6042.92	2630.79	1.151	2.9789e-05	0.00071151	NM_001359990.1	264064	Dctn4	transcript	0.00769333	1.92256	-7.96521	0.000280714	0.0131685
mmu-miR-30e-3p	6042.92	2630.79	1.151	2.9789e-05	0.00071151	NM_010101.4	13610	Dctn4	transcript	6.62156	3.85762	0.779461	0.0016731	0.034352
mmu-miR-30e-3p	6042.92	2630.79	1.151	2.9789e-05	0.00071151	XM_006505871.4	21366	Dctn4	transcript	0	11.8486	#NAME?	0.000348779	0.0150187
mmu-miR-30e-3p	6042.92	2630.79	1.151	2.9789e-05	0.00071151	NM_144880.4	226849	Dctn4	transcript	38.2867	23.0042	0.734947	0.00097796	0.0262643
mmu-miR-30e-3p	6042.92	2630.79	1.151	2.9789e-05	0.00071151	NM_001142957.1	100043468	Dcun1d2	transcript	6.14218	3.75226	0.71099	0.00229483	0.0413623
mmu-miR-30e-3p	6042.92	2630.79	1.151	2.9789e-05	0.00071151	NM_024288.2	68477	Dcun1d2	transcript	27.6091	14.9293	0.887002	0.000595645	0.0199437
mmu-miR-30e-3p	6042.92	2630.79	1.151	2.9789e-05	0.00071151	NM_178793.4	320924	Dcun1d2	transcript	4.66364	1.19089	1.96941	0.00195321	0.0377505
mmu-miR-30e-3p	6042.92	2630.79	1.151	2.9789e-05	0.00071151	XM_006497825.4	20930	Dcun1d2	transcript	0	1.1796	#NAME?	0.000208101	0.011849
mmu-miR-30e-3p	6042.92	2630.79	1.151	2.9789e-05	0.00071151	NM_130796.4	170625	Dcun1d2	transcript	10.5566	6.22842	0.761209	0.000427905	0.0168392
mmu-miR-30e-3p	6042.92	2630.79	1.151	2.9789e-05	0.00071151	NM_026310.3	67681	Dcun1d2	transcript	39.553	37.8476	0.0635857	0.00193923	0.0375829
mmu-miR-30e-3p	6042.92	2630.79	1.151	2.9789e-05	0.00071151	NM_001171000.2	74340	Dcun1d2	transcript	5.19366	5.65173	-0.12194	0.00149626	0.0328408
mmu-miR-30e-3p	6042.92	2630.79	1.151	2.9789e-05	0.00071151	NM_025613.3	58521	Dcun1d2	transcript	10.5072	13.6496	-0.377482	0.000161489	0.011849
mmu-miR-30e-3p	6042.92	2630.79	1.151	2.9789e-05	0.00071151	NM_021284.6	16653	Dcun1d2	transcript	12.0298	6.68577	0.847446	0.00300691	0.0479264
mmu-miR-30e-3p	6042.92	2630.79	1.151	2.9789e-05	0.00071151	TCONS_00011063	21843	Dcun1d2	transcript	0	1.86295	#NAME?	0.000394296	0.0162795
mmu-miR-30e-3p	6042.92	2630.79	1.151	2.9789e-05	0.00071151	NM_001291835.1	11655	Dcun1d2	transcript	0.0961463	1.86164	-4.2752	0.00071895	0.0218102
mmu-miR-30e-3p	6042.92	2630.79	1.151	2.9789e-05	0.00071151	NM_172436.4	78830	Dcun1d2	transcript	67.2218	36.5853	0.877663	0.00153206	0.0331877
mmu-miR-30e-3p	6042.92	2630.79	1.151	2.9789e-05	0.00071151	TCONS_00023473	106869	Dcun1d2	transcript	3.68991	0.585867	2.65494	1.76004e-05	0.00898899
mmu-miR-30e-3p	6042.92	2630.79	1.151	2.9789e-05	0.00071151	NM_009433.3	22110	Dcun1d2	transcript	32.3123	27.2293	0.246923	0.000539287	0.0191482
mmu-miR-30e-3p	6042.92	2630.79	1.151	2.9789e-05	0.00071151	NM_033322.3	93730	Dcun1d2	transcript	0.252209	1.35882	-2.42966	0.000922965	0.0256889
mmu-miR-30e-3p	6042.92	2630.79	1.151	2.9789e-05	0.00071151	NM_009061.4	19735	Dcun1d2	transcript	3.92395	10.8135	-1.46246	0.0027111	0.0450388
mmu-miR-30e-3p	6042.92	2630.79	1.151	2.9789e-05	0.00071151	NM_013845.5	26563	Dcun1d2	transcript	1.47389	3.10351	-1.07427	0.000574774	0.0198218
mmu-miR-30e-3p	6042.92	2630.79	1.151	2.9789e-05	0.00071151	TCONS_00012919	17999	Dcun1d2	transcript	121.808	126.953	-0.0596877	0.000984095	0.0263548
mmu-miR-30e-3p	6042.92	2630.79	1.151	2.9789e-05	0.00071151	TCONS_00025226	12830	Dcun1d2	transcript	0.030045	2.42359	-6.33388	0.000159358	0.011849
mmu-miR-30e-3p	6042.92	2630.79	1.151	2.9789e-05	0.00071151	XM_030243724.1	80914	Ddt	transcript	0.0461117	2.38203	-5.69092	6.62482e-05	0.011849
mmu-miR-30e-3p	6042.92	2630.79	1.151	2.9789e-05	0.00071151	XM_036157871.1	16553	Dennd6a	transcript	2.08717	0	Inf	0.000311552	0.0139803
mmu-miR-1247-5p	11.6187	0.218395	2.6987	4.7007e-05	0.0010126	NM_001081236.1	76792	Dennd6a	transcript	8.82049	3.09024	1.51314	0.00010701	0.011849
mmu-miR-1247-5p	11.6187	0.218395	2.6987	4.7007e-05	0.0010126	NM_145586.1	233806	Dennd6a	transcript	8.59181	15.0761	-0.811226	0.00166945	0.034344
mmu-miR-1247-5p	11.6187	0.218395	2.6987	4.7007e-05	0.0010126	NM_001324531.1	19340	Dennd6a	transcript	4.60047	5.82791	-0.341197	0.00247029	0.0430463
mmu-miR-1247-5p	11.6187	0.218395	2.6987	4.7007e-05	0.0010126	NM_053207.2	112405	Dennd6a	transcript	144.441	60.9259	1.24535	1.49822e-05	0.00898899
mmu-miR-1247-5p	11.6187	0.218395	2.6987	4.7007e-05	0.0010126	XM_030248555.2	239555	Dennd6a	transcript	0	1.40417	#NAME?	0.000208101	0.011849
mmu-miR-1247-5p	11.6187	0.218395	2.6987	4.7007e-05	0.0010126	TCONS_00007657	12492	Dennd6a	transcript	1.09006	8.33987	-2.93561	0.000503473	0.0185619
mmu-miR-1247-5p	11.6187	0.218395	2.6987	4.7007e-05	0.0010126	XM_006500784.4	269424	Dennd6a	transcript	0.0240483	2.34219	-6.60578	0.00298096	0.047773
mmu-miR-1247-5p	11.6187	0.218395	2.6987	4.7007e-05	0.0010126	TCONS_00020946	78929	Dennd6a	transcript	28.6124	16.9856	0.752328	0.00258292	0.0439811
mmu-miR-1247-5p	11.6187	0.218395	2.6987	4.7007e-05	0.0010126	XM_006505871.4	21366	Dennd6a	transcript	0	11.8486	#NAME?	0.000348779	0.0150187
mmu-miR-1247-5p	11.6187	0.218395	2.6987	4.7007e-05	0.0010126	NM_026302.4	67665	Dennd6a	transcript	9.83586	11.1804	-0.184853	0.00319621	0.0495412
mmu-miR-1247-5p	11.6187	0.218395	2.6987	4.7007e-05	0.0010126	NM_001370902.1	665700	Dennd6a	transcript	7.60778	1.38907	2.45336	3.91995e-05	0.0115968
mmu-miR-1247-5p	11.6187	0.218395	2.6987	4.7007e-05	0.0010126	NM_026395.2	67830	Dennd6a	transcript	26.4419	18.6726	0.501905	0.00321324	0.0495881
mmu-miR-1247-5p	11.6187	0.218395	2.6987	4.7007e-05	0.0010126	NM_011838.4	23936	Dennd6a	transcript	70.7077	25.7672	1.45633	0.000325774	0.0144091
mmu-miR-1247-5p	11.6187	0.218395	2.6987	4.7007e-05	0.0010126	NM_172338.2	214063	Dennd6a	transcript	8.89771	4.23916	1.06965	0.000105129	0.011849
mmu-miR-1247-5p	11.6187	0.218395	2.6987	4.7007e-05	0.0010126	NM_183358.4	102060	Dennd6a	transcript	11.8925	9.82021	0.276231	0.000123986	0.011849
mmu-miR-1247-5p	11.6187	0.218395	2.6987	4.7007e-05	0.0010126	XM_006527267.5	66866	Dennd6a	transcript	4.92495	2.38861	1.04394	0.000595022	0.0199437
mmu-miR-1247-5p	11.6187	0.218395	2.6987	4.7007e-05	0.0010126	NM_026768.3	68565	Dennd6a	transcript	21.5091	23.3512	-0.118554	0.00268637	0.0449153
mmu-miR-1247-5p	11.6187	0.218395	2.6987	4.7007e-05	0.0010126	TCONS_00000331	347722	Dennd6a	transcript	0.0155523	1.00315	-6.01126	0.000242995	0.0123388
mmu-miR-1247-5p	11.6187	0.218395	2.6987	4.7007e-05	0.0010126	NM_021472.4	58809	Dennd6a	transcript	22.7317	10.4096	1.12679	0.00171352	0.0349765
mmu-miR-1247-5p	11.6187	0.218395	2.6987	4.7007e-05	0.0010126	NM_133167.3	170736	Dennd6a	transcript	17.1236	14.1036	0.279927	0.00171586	0.0349765
mmu-miR-1247-5p	11.6187	0.218395	2.6987	4.7007e-05	0.0010126	XM_030248941.2	12053	Dennd6a	transcript	0.000403	0.870681	-11.0771	0.000207741	0.011849
mmu-miR-1247-5p	11.6187	0.218395	2.6987	4.7007e-05	0.0010126	NM_025788.3	66830	Dennd6a	transcript	10.8813	6.39523	0.766786	0.000381223	0.0160261
mmu-miR-1247-5p	11.6187	0.218395	2.6987	4.7007e-05	0.0010126	NM_026605.2	68188	Dennd6a	transcript	0.084507	14.8845	-7.46053	5.32149e-05	0.011849
mmu-miR-1247-5p	11.6187	0.218395	2.6987	4.7007e-05	0.0010126	NM_008628.3	17685	Dennd6a	transcript	5.02646	6.60455	-0.393918	0.00274211	0.0453069
mmu-miR-1247-5p	11.6187	0.218395	2.6987	4.7007e-05	0.0010126	NM_023434.3	268741	Dennd6a	transcript	8.76242	4.26688	1.03815	5.78462e-05	0.011849
mmu-miR-1247-5p	11.6187	0.218395	2.6987	4.7007e-05	0.0010126	XM_017317866.3	225131	Dennd6a	transcript	0.119621	1.86033	-3.95902	0.00123663	0.0296436
mmu-miR-1247-5p	11.6187	0.218395	2.6987	4.7007e-05	0.0010126	NM_001127346.1	75597	Dennd6a	transcript	1.89839	6.35692	-1.74355	0.000426338	0.0168243
mmu-miR-1247-5p	11.6187	0.218395	2.6987	4.7007e-05	0.0010126	NM_001253757.1	66471	Dhrs7	transcript	1.50649	1.72974	-0.199368	0.00129997	0.0302409
mmu-miR-1247-5p	11.6187	0.218395	2.6987	4.7007e-05	0.0010126	NM_021714.4	60321	Dhrs7	transcript	11.5157	6.84663	0.750134	0.000104694	0.011849
mmu-miR-664-3p	57.0414	158.552	-1.3933	2.1563e-05	0.00069675	TCONS_00016414	104625	Dixdc1	transcript	0	2.84629	#NAME?	0.000208101	0.011849
mmu-miR-664-3p	57.0414	158.552	-1.3933	2.1563e-05	0.00069675	TCONS_00008450	232157	Dixdc1	transcript	0.0243883	1.19965	-5.62028	0.000147072	0.011849
mmu-miR-664-3p	57.0414	158.552	-1.3933	2.1563e-05	0.00069675	TCONS_00009768	78286	Dixdc1	transcript	5.80375	0.092506	5.9713	0.000875541	0.0248661
mmu-miR-664-3p	57.0414	158.552	-1.3933	2.1563e-05	0.00069675	NM_001164580.1	233812	Dixdc1	transcript	3.49234	4.10635	-0.233664	0.000328963	0.0144734
mmu-miR-664-3p	57.0414	158.552	-1.3933	2.1563e-05	0.00069675	XM_006527267.5	66866	Dixdc1	transcript	4.92495	2.38861	1.04394	0.000595022	0.0199437
mmu-miR-664-3p	57.0414	158.552	-1.3933	2.1563e-05	0.00069675	TCONS_00015770	327978	Dixdc1	transcript	3.62261	0.745147	2.28143	0.00305254	0.0483264
mmu-miR-664-3p	57.0414	158.552	-1.3933	2.1563e-05	0.00069675	NM_001361966.1	73998	Dixdc1	transcript	3.55004	1.71795	1.04715	0.00105024	0.027401
mmu-miR-664-3p	57.0414	158.552	-1.3933	2.1563e-05	0.00069675	NM_177673.2	230967	Dixdc1	transcript	0.940088	3.10235	-1.72249	8.11368e-05	0.011849
mmu-miR-664-3p	57.0414	158.552	-1.3933	2.1563e-05	0.00069675	NM_001025572.1	106585	Dixdc1	transcript	2.84917	4.56201	-0.67913	0.0027118	0.0450388
mmu-miR-664-3p	57.0414	158.552	-1.3933	2.1563e-05	0.00069675	XM_006512550.4	14816	Dixdc1	transcript	0.000571	2.47697	-12.0828	0.000287366	0.0132609
mmu-miR-664-3p	57.0414	158.552	-1.3933	2.1563e-05	0.00069675	XM_011239446.4	228026	Dixdc1	transcript	0	3.2763	#NAME?	0.000208101	0.011849
mmu-miR-664-3p	57.0414	158.552	-1.3933	2.1563e-05	0.00069675	NM_001112701.1	19158	Dixdc1	transcript	5.2053	2.48522	1.06661	0.000201821	0.011849
mmu-miR-664-3p	57.0414	158.552	-1.3933	2.1563e-05	0.00069675	NM_018743.4	102247	Dixdc1	transcript	13.5676	7.76624	0.804877	0.000326486	0.0144091
mmu-miR-664-3p	57.0414	158.552	-1.3933	2.1563e-05	0.00069675	NM_011436.4	20660	Dixdc1	transcript	2.80025	0.980742	1.51361	0.000432615	0.0168945
mmu-miR-664-3p	57.0414	158.552	-1.3933	2.1563e-05	0.00069675	XM_006511156.2	24127	Dixdc1	transcript	0	1.84218	#NAME?	0.000225398	0.0120256
mmu-miR-664-3p	57.0414	158.552	-1.3933	2.1563e-05	0.00069675	NM_001162532.1	100038347	Dixdc1	transcript	77.6951	75.6235	0.0389891	0.000481253	0.0178948
mmu-miR-664-3p	57.0414	158.552	-1.3933	2.1563e-05	0.00069675	NM_001357448.1	59057	Dixdc1	transcript	0.89975	1.66028	-0.883828	0.00145457	0.0324519
mmu-miR-664-3p	57.0414	158.552	-1.3933	2.1563e-05	0.00069675	NM_001379355.1	68428	Dixdc1	transcript	5.88743	0.378303	3.96002	0.00176546	0.0355779
[truncated: 4,977 more rows]

## Sheet: HypoTH+T3 vs HypoTH
sRNA	HypoTH+T3_readcount	HypoTH_readcount	log2FoldChange	pval	padj	Transcript	gene_id	gene_name	feature	HypoTH+T3.value	HypoTH.value	log2foldchange	pvalue	qvalue
[truncated: 2,508 more rows]

[truncated: 1 more sheets: HypoTH+T3 vs Control]
