# Supplementary material for: Novel Transcriptomic Interactomes of Noncoding RNAs in the Heart under Altered Thyroid Hormonal States
Source: Int J Mol Sci. 2023 Mar 31;24(7):6560. doi: 10.3390/ijms24076560 (PMC10095585; doi:10.3390/ijms24076560)
Supplement: Supplementary file 1 [file ijms-24-06560-s001.zip › Supplemental File S21 Differentially Expressed mRNA associated Protein Protein Interactions.xlsx]

## Sheet: HypoTH vs Control
Protein_id1	Gene_id1	Official_Symbol	Description	Protein_id2	Gene_id2	Official_Symbol	Description	PPI_score
ENSMUSP00000000137	66713	Actr2	Actr2	ENSMUSP00000000727	19344	Rab5b	Rab5b	906
ENSMUSP00000000137	66713	Actr2	Actr2	ENSMUSP00000130874	243764	Chrm2	Chrm2	900
ENSMUSP00000000137	66713	Actr2	Actr2	ENSMUSP00000137503	74117	Actr3	Actr3	995
ENSMUSP00000000137	66713	Actr2	Actr2	ENSMUSP00000022169	15212	Hexb	Hexb	900
ENSMUSP00000000137	66713	Actr2	Actr2	ENSMUSP00000121182	76577	Faf2	Faf2	904
ENSMUSP00000000137	66713	Actr2	Actr2	ENSMUSP00000108723	66691	Gapvd1	Gapvd1	910
ENSMUSP00000000137	66713	Actr2	Actr2	ENSMUSP00000099461	56431	Dstn	Dstn	713
ENSMUSP00000000137	66713	Actr2	Actr2	ENSMUSP00000070958	11607	Agtr1a	Agtr1a	900
ENSMUSP00000000137	66713	Actr2	Actr2	ENSMUSP00000120096	22186	Uba52	Uba52	900
ENSMUSP00000000137	66713	Actr2	Actr2	ENSMUSP00000108075	58194	Sh3kbp1	Sh3kbp1	915
ENSMUSP00000000137	66713	Actr2	Actr2	ENSMUSP00000021506	20716	Serpina3n	Serpina3n	903
ENSMUSP00000000137	66713	Actr2	Actr2	ENSMUSP00000130098	23970	Pacsin2	Pacsin2	908
ENSMUSP00000000137	66713	Actr2	Actr2	ENSMUSP00000099584	56378	Arpc3	Arpc3	999
ENSMUSP00000000137	66713	Actr2	Actr2	ENSMUSP00000019317	19345	Rab5c	Rab5c	909
ENSMUSP00000000137	66713	Actr2	Actr2	ENSMUSP00000021273	22318	Vamp2	Vamp2	913
ENSMUSP00000000188	12444	Ccnd2	Ccnd2	ENSMUSP00000023507	56637	Gsk3b	Gsk3b	898
ENSMUSP00000000727	19344	Rab5b	Rab5b	ENSMUSP00000017188	20719	Serpinb6a	Serpinb6a	901
ENSMUSP00000000727	19344	Rab5b	Rab5b	ENSMUSP00000130874	243764	Chrm2	Chrm2	901
ENSMUSP00000000727	19344	Rab5b	Rab5b	ENSMUSP00000137503	74117	Actr3	Actr3	909
ENSMUSP00000000727	19344	Rab5b	Rab5b	ENSMUSP00000020343	216344	Rab21	Rab21	913
ENSMUSP00000000727	19344	Rab5b	Rab5b	ENSMUSP00000019317	19345	Rab5c	Rab5c	909
ENSMUSP00000000727	19344	Rab5b	Rab5b	ENSMUSP00000021273	22318	Vamp2	Vamp2	920
ENSMUSP00000000727	19344	Rab5b	Rab5b	ENSMUSP00000108723	66691	Gapvd1	Gapvd1	960
ENSMUSP00000000727	19344	Rab5b	Rab5b	ENSMUSP00000070958	11607	Agtr1a	Agtr1a	908
ENSMUSP00000000727	19344	Rab5b	Rab5b	ENSMUSP00000120096	22186	Uba52	Uba52	901
ENSMUSP00000000727	19344	Rab5b	Rab5b	ENSMUSP00000108075	58194	Sh3kbp1	Sh3kbp1	915
ENSMUSP00000000727	19344	Rab5b	Rab5b	ENSMUSP00000130098	23970	Pacsin2	Pacsin2	927
ENSMUSP00000000727	19344	Rab5b	Rab5b	ENSMUSP00000099584	56378	Arpc3	Arpc3	902
ENSMUSP00000001569	14251	Flot1	Flot1	ENSMUSP00000049007	12385	Ctnna1	Ctnna1	900
ENSMUSP00000001569	14251	Flot1	Flot1	ENSMUSP00000007799	12389	Cav1	Cav1	975
ENSMUSP00000001569	14251	Flot1	Flot1	ENSMUSP00000007130	12387	Ctnnb1	Ctnnb1	908
ENSMUSP00000001927	268977	Ltbp1	Ltbp1	ENSMUSP00000020702	16009	Igfbp3	Igfbp3	936
ENSMUSP00000001927	268977	Ltbp1	Ltbp1	ENSMUSP00000031779	12321	Calu	Calu	907
ENSMUSP00000001927	268977	Ltbp1	Ltbp1	ENSMUSP00000028938	13010	Cst3	Cst3	900
ENSMUSP00000001927	268977	Ltbp1	Ltbp1	ENSMUSP00000025166	12558	Cdh2	Cdh2	918
ENSMUSP00000001927	268977	Ltbp1	Ltbp1	ENSMUSP00000029846	16007	Ccn1	Ccn1	913
ENSMUSP00000001927	268977	Ltbp1	Ltbp1	ENSMUSP00000064801	338366	Mia3	Mia3	900
ENSMUSP00000001927	268977	Ltbp1	Ltbp1	ENSMUSP00000033828	14456	Gas6	Gas6	902
ENSMUSP00000002292	68477	Rmnd5a	Rmnd5a	ENSMUSP00000130636	56705	Ranbp9	Ranbp9	902
ENSMUSP00000002292	68477	Rmnd5a	Rmnd5a	ENSMUSP00000026699	27418	Mkln1	Mkln1	823
ENSMUSP00000002292	68477	Rmnd5a	Rmnd5a	ENSMUSP00000100058	22214	Ube2h	Ube2h	737
ENSMUSP00000002303	11853	Rhoc	Rhoc	ENSMUSP00000039427	544817	Arhgap27	Arhgap27	936
ENSMUSP00000002303	11853	Rhoc	Rhoc	ENSMUSP00000024956	104215	Rhoq	Rhoq	907
ENSMUSP00000002303	11853	Rhoc	Rhoc	ENSMUSP00000020101	69288	Rhobtb1	Rhobtb1	910
ENSMUSP00000002303	11853	Rhoc	Rhoc	ENSMUSP00000099991	18607	Pdpk1	Pdpk1	918
ENSMUSP00000002683	52132	Ccdc97	Ccdc97	ENSMUSP00000118179	12847	Copa	Copa	712
ENSMUSP00000003947	18104	Nqo1	Nqo1	ENSMUSP00000007012	20656	Sod2	Sod2	717
ENSMUSP00000004172	15369	Hmox2	Hmox2	ENSMUSP00000117231	70791	Hars2	Hars2	860
ENSMUSP00000005233	27103	Eif2ak4	Eif2ak4	ENSMUSP00000046101	13629	Eef2	Eef2	772
ENSMUSP00000005826	210582	Coq10a	Coq10a	ENSMUSP00000022480	239017	Ogdhl	Ogdhl	708
ENSMUSP00000005826	210582	Coq10a	Coq10a	ENSMUSP00000056502	15929	Idh3g	Idh3g	715
ENSMUSP00000005826	210582	Coq10a	Coq10a	ENSMUSP00000100038	11428	Aco1	Aco1	980
ENSMUSP00000005826	210582	Coq10a	Coq10a	ENSMUSP00000023043	11564	Adsl	Adsl	901
ENSMUSP00000005826	210582	Coq10a	Coq10a	ENSMUSP00000007012	20656	Sod2	Sod2	815
ENSMUSP00000005826	210582	Coq10a	Coq10a	ENSMUSP00000019323	17448	Mdh2	Mdh2	995
ENSMUSP00000005826	210582	Coq10a	Coq10a	ENSMUSP00000099490	107476	Acaca	Acaca	882
ENSMUSP00000005826	210582	Coq10a	Coq10a	ENSMUSP00000127526	67834	Idh3a	Idh3a	914
ENSMUSP00000005826	210582	Coq10a	Coq10a	ENSMUSP00000026743	22273	Uqcrc1	Uqcrc1	702
ENSMUSP00000005826	210582	Coq10a	Coq10a	ENSMUSP00000080993	17721	ND5	ND5	768
ENSMUSP00000005826	210582	Coq10a	Coq10a	ENSMUSP00000034834	18746	Pkm	Pkm	756
ENSMUSP00000006235	13030	Ctsb	Ctsb	ENSMUSP00000121203	13033	Ctsd	Ctsd	949
ENSMUSP00000006235	13030	Ctsb	Ctsb	ENSMUSP00000130660	14466	Gba	Gba	740
ENSMUSP00000006235	13030	Ctsb	Ctsb	ENSMUSP00000028938	13010	Cst3	Cst3	786
ENSMUSP00000006496	76846	Rps9	Rps9	ENSMUSP00000058432	66481	Rps21	Rps21	999
ENSMUSP00000006496	76846	Rps9	Rps9	ENSMUSP00000086614	68436	Rpl34	Rpl34	997
ENSMUSP00000006496	76846	Rps9	Rps9	ENSMUSP00000102213	67671	Rpl38	Rpl38	998
ENSMUSP00000006496	76846	Rps9	Rps9	ENSMUSP00000099435	65019	Rpl23	Rpl23	999
ENSMUSP00000006496	76846	Rps9	Rps9	ENSMUSP00000120096	22186	Uba52	Uba52	998
ENSMUSP00000006496	76846	Rps9	Rps9	ENSMUSP00000035105	16785	Rpsa	Rpsa	998
ENSMUSP00000006496	76846	Rps9	Rps9	ENSMUSP00000017548	19921	Rpl19	Rpl19	999
ENSMUSP00000006496	76846	Rps9	Rps9	ENSMUSP00000046101	13629	Eef2	Eef2	974
ENSMUSP00000006496	76846	Rps9	Rps9	ENSMUSP00000080854	100503670	Rpl5	Rpl5	995
ENSMUSP00000006496	76846	Rps9	Rps9	ENSMUSP00000102368	68979	Nol11	Nol11	907
ENSMUSP00000006496	76846	Rps9	Rps9	ENSMUSP00000110013	54127	Rps28	Rps28	999
ENSMUSP00000006496	76846	Rps9	Rps9	ENSMUSP00000023869	68184	Denr	Denr	768
ENSMUSP00000006496	76846	Rps9	Rps9	ENSMUSP00000034966	67891	Rpl4	Rpl4	999
ENSMUSP00000006496	76846	Rps9	Rps9	ENSMUSP00000030675	66407	Mrps15	Mrps15	870
ENSMUSP00000006496	76846	Rps9	Rps9	ENSMUSP00000078654	319195	Rpl17	Rpl17	991
ENSMUSP00000006496	76846	Rps9	Rps9	ENSMUSP00000034738	225215	Rsl24d1	Rsl24d1	750
ENSMUSP00000006496	76846	Rps9	Rps9	ENSMUSP00000108837	19982	Rpl36a	Rpl36a	995
ENSMUSP00000006496	76846	Rps9	Rps9	ENSMUSP00000035177	94062	Mrpl3	Mrpl3	769
ENSMUSP00000006496	76846	Rps9	Rps9	ENSMUSP00000032597	19943	Rpl28	Rpl28	986
ENSMUSP00000006496	76846	Rps9	Rps9	ENSMUSP00000058368	76808	Rpl18a	Rpl18a	996
ENSMUSP00000006496	76846	Rps9	Rps9	ENSMUSP00000071652	20090	Rps29	Rps29	978
ENSMUSP00000006496	76846	Rps9	Rps9	ENSMUSP00000023269	68193	Rpl24	Rpl24	994
ENSMUSP00000006496	76846	Rps9	Rps9	ENSMUSP00000027438	17975	Ncl	Ncl	921
ENSMUSP00000006496	76846	Rps9	Rps9	ENSMUSP00000106336	100101806	Srp54c	Srp54c	861
ENSMUSP00000006496	76846	Rps9	Rps9	ENSMUSP00000076503	28030	Gfm1	Gfm1	726
ENSMUSP00000006669	228026	Pdk1	Pdk1	ENSMUSP00000041447	18604	Pdk2	Pdk2	972
ENSMUSP00000006669	228026	Pdk1	Pdk1	ENSMUSP00000099991	18607	Pdpk1	Pdpk1	743
ENSMUSP00000007012	20656	Sod2	Sod2	ENSMUSP00000098768	20657	Sod3	Sod3	957
ENSMUSP00000007012	20656	Sod2	Sod2	ENSMUSP00000081011	14778	Gpx3	Gpx3	782
ENSMUSP00000007012	20656	Sod2	Sod2	ENSMUSP00000103007	269951	Idh2	Idh2	972
ENSMUSP00000007130	12387	Ctnnb1	Ctnnb1	ENSMUSP00000099436	26446	Psmb3	Psmb3	904
ENSMUSP00000007130	12387	Ctnnb1	Ctnnb1	ENSMUSP00000069851	320404	Itpkb	Itpkb	742
ENSMUSP00000007130	12387	Ctnnb1	Ctnnb1	ENSMUSP00000023165	12914	Crebbp	Crebbp	982
ENSMUSP00000007130	12387	Ctnnb1	Ctnnb1	ENSMUSP00000086716	22284	Usp9x	Usp9x	753
ENSMUSP00000007130	12387	Ctnnb1	Ctnnb1	ENSMUSP00000051432	15270	H2ax	H2ax	923
ENSMUSP00000007130	12387	Ctnnb1	Ctnnb1	ENSMUSP00000023507	56637	Gsk3b	Gsk3b	998
ENSMUSP00000007130	12387	Ctnnb1	Ctnnb1	ENSMUSP00000021447	26932	Ppp2r5e	Ppp2r5e	906
ENSMUSP00000007130	12387	Ctnnb1	Ctnnb1	ENSMUSP00000025166	12558	Cdh2	Cdh2	993
ENSMUSP00000007130	12387	Ctnnb1	Ctnnb1	ENSMUSP00000086207	29857	Mapk12	Mapk12	916
ENSMUSP00000007130	12387	Ctnnb1	Ctnnb1	ENSMUSP00000120096	22186	Uba52	Uba52	901
ENSMUSP00000007130	12387	Ctnnb1	Ctnnb1	ENSMUSP00000135215	319148	H3c3	H3c3	913
ENSMUSP00000007130	12387	Ctnnb1	Ctnnb1	ENSMUSP00000118546	16825	Ldb1	Ldb1	734
ENSMUSP00000007130	12387	Ctnnb1	Ctnnb1	ENSMUSP00000028278	59029	Psmd14	Psmd14	913
ENSMUSP00000007130	12387	Ctnnb1	Ctnnb1	ENSMUSP00000049007	12385	Ctnna1	Ctnna1	999
ENSMUSP00000007130	12387	Ctnnb1	Ctnnb1	ENSMUSP00000030769	19181	Psmc2	Psmc2	906
ENSMUSP00000007799	12389	Cav1	Cav1	ENSMUSP00000069851	320404	Itpkb	Itpkb	707
ENSMUSP00000007799	12389	Cav1	Cav1	ENSMUSP00000023507	56637	Gsk3b	Gsk3b	924
ENSMUSP00000007799	12389	Cav1	Cav1	ENSMUSP00000070751	12215	Bsg	Bsg	966
ENSMUSP00000007799	12389	Cav1	Cav1	ENSMUSP00000044979	109042	Cavin3	Cavin3	828
ENSMUSP00000007814	16549	Khsrp	Khsrp	ENSMUSP00000110584	14007	Celf2	Celf2	717
ENSMUSP00000009102	21427	Vps72	Vps72	ENSMUSP00000128483	66471	Anp32e	Anp32e	788
ENSMUSP00000010191	15587	Hyal2	Hyal2	ENSMUSP00000014221	56398	Chp1	Chp1	900
ENSMUSP00000010550	68836	Mrpl52	Mrpl52	ENSMUSP00000035177	94062	Mrpl3	Mrpl3	976
ENSMUSP00000010550	68836	Mrpl52	Mrpl52	ENSMUSP00000075226	67270	Mrpl42	Mrpl42	939
ENSMUSP00000010550	68836	Mrpl52	Mrpl52	ENSMUSP00000039951	66047	Mrpl54	Mrpl54	984
ENSMUSP00000010550	68836	Mrpl52	Mrpl52	ENSMUSP00000076503	28030	Gfm1	Gfm1	900
ENSMUSP00000010550	68836	Mrpl52	Mrpl52	ENSMUSP00000030675	66407	Mrps15	Mrps15	980
ENSMUSP00000015723	18091	Nkx2-5	Nkx2-5	ENSMUSP00000080538	140781	Myh7	Myh7	856
ENSMUSP00000015723	18091	Nkx2-5	Nkx2-5	ENSMUSP00000080538	17888	Myh6	Myh6	856
ENSMUSP00000015723	18091	Nkx2-5	Nkx2-5	ENSMUSP00000107717	21956	Tnnt2	Tnnt2	821
ENSMUSP00000015723	18091	Nkx2-5	Nkx2-5	ENSMUSP00000099867	68966	Ngdn	Ngdn	722
ENSMUSP00000015723	18091	Nkx2-5	Nkx2-5	ENSMUSP00000041774	14465	Gata6	Gata6	846
ENSMUSP00000015723	18091	Nkx2-5	Nkx2-5	ENSMUSP00000099985	17898	Myl7	Myl7	827
ENSMUSP00000015934	20930	Surf1	Surf1	ENSMUSP00000080993	17721	ND5	ND5	810
ENSMUSP00000015934	20930	Surf1	Surf1	ENSMUSP00000026743	22273	Uqcrc1	Uqcrc1	816
ENSMUSP00000016033	16993	Lta4h	Lta4h	ENSMUSP00000121203	13033	Ctsd	Ctsd	908
ENSMUSP00000016033	16993	Lta4h	Lta4h	ENSMUSP00000025563	14319	Fth1	Fth1	909
ENSMUSP00000016033	16993	Lta4h	Lta4h	ENSMUSP00000028938	13010	Cst3	Cst3	900
ENSMUSP00000016105	11566	Adss	Adss	ENSMUSP00000023043	11564	Adsl	Adsl	992
ENSMUSP00000016105	11566	Adss	Adss	ENSMUSP00000031160	67054	Paics	Paics	834
ENSMUSP00000016315	16780	Lamb3	Lamb3	ENSMUSP00000087119	17387	Mmp14	Mmp14	912
ENSMUSP00000016315	16780	Lamb3	Lamb3	ENSMUSP00000095392	13518	Dst	Dst	918
ENSMUSP00000016315	16780	Lamb3	Lamb3	ENSMUSP00000101622	12476	Cd151	Cd151	905
ENSMUSP00000017188	20719	Serpinb6a	Serpinb6a	ENSMUSP00000029445	16653	Kras	Kras	900
ENSMUSP00000017548	19921	Rpl19	Rpl19	ENSMUSP00000058432	66481	Rps21	Rps21	999
ENSMUSP00000017548	19921	Rpl19	Rpl19	ENSMUSP00000086614	68436	Rpl34	Rpl34	999
ENSMUSP00000017548	19921	Rpl19	Rpl19	ENSMUSP00000102213	67671	Rpl38	Rpl38	999
ENSMUSP00000017548	19921	Rpl19	Rpl19	ENSMUSP00000099435	65019	Rpl23	Rpl23	999
ENSMUSP00000017548	19921	Rpl19	Rpl19	ENSMUSP00000120096	22186	Uba52	Uba52	998
ENSMUSP00000017548	19921	Rpl19	Rpl19	ENSMUSP00000035105	16785	Rpsa	Rpsa	982
ENSMUSP00000017548	19921	Rpl19	Rpl19	ENSMUSP00000046101	13629	Eef2	Eef2	994
ENSMUSP00000017548	19921	Rpl19	Rpl19	ENSMUSP00000080854	100503670	Rpl5	Rpl5	999
ENSMUSP00000017548	19921	Rpl19	Rpl19	ENSMUSP00000019649	22187	Ubb	Ubb	838
ENSMUSP00000017548	19921	Rpl19	Rpl19	ENSMUSP00000110013	54127	Rps28	Rps28	999
ENSMUSP00000017548	19921	Rpl19	Rpl19	ENSMUSP00000034966	67891	Rpl4	Rpl4	999
ENSMUSP00000017548	19921	Rpl19	Rpl19	ENSMUSP00000030675	66407	Mrps15	Mrps15	913
ENSMUSP00000017548	19921	Rpl19	Rpl19	ENSMUSP00000078654	319195	Rpl17	Rpl17	998
ENSMUSP00000017548	19921	Rpl19	Rpl19	ENSMUSP00000034738	225215	Rsl24d1	Rsl24d1	917
ENSMUSP00000017548	19921	Rpl19	Rpl19	ENSMUSP00000108837	19982	Rpl36a	Rpl36a	999
ENSMUSP00000017548	19921	Rpl19	Rpl19	ENSMUSP00000035177	94062	Mrpl3	Mrpl3	858
ENSMUSP00000017548	19921	Rpl19	Rpl19	ENSMUSP00000032597	19943	Rpl28	Rpl28	998
ENSMUSP00000017548	19921	Rpl19	Rpl19	ENSMUSP00000058368	76808	Rpl18a	Rpl18a	997
ENSMUSP00000017548	19921	Rpl19	Rpl19	ENSMUSP00000071652	20090	Rps29	Rps29	974
ENSMUSP00000017548	19921	Rpl19	Rpl19	ENSMUSP00000023269	68193	Rpl24	Rpl24	998
ENSMUSP00000018800	17896	Myl4	Myl4	ENSMUSP00000109633	13405	Dmd	Dmd	923
ENSMUSP00000018800	17896	Myl4	Myl4	ENSMUSP00000080538	140781	Myh7	Myh7	981
ENSMUSP00000018800	17896	Myl4	Myl4	ENSMUSP00000080538	17888	Myh6	Myh6	981
ENSMUSP00000018800	17896	Myl4	Myl4	ENSMUSP00000107717	21956	Tnnt2	Tnnt2	963
ENSMUSP00000018800	17896	Myl4	Myl4	ENSMUSP00000127070	17868	Mybpc3	Mybpc3	938
ENSMUSP00000018800	17896	Myl4	Myl4	ENSMUSP00000099867	68966	Ngdn	Ngdn	962
ENSMUSP00000018800	17896	Myl4	Myl4	ENSMUSP00000097561	22138	Ttn	Ttn	961
ENSMUSP00000018800	17896	Myl4	Myl4	ENSMUSP00000023538	107589	Mylk	Mylk	895
ENSMUSP00000019317	19345	Rab5c	Rab5c	ENSMUSP00000130874	243764	Chrm2	Chrm2	901
ENSMUSP00000019317	19345	Rab5c	Rab5c	ENSMUSP00000137503	74117	Actr3	Actr3	929
ENSMUSP00000019317	19345	Rab5c	Rab5c	ENSMUSP00000020343	216344	Rab21	Rab21	913
ENSMUSP00000019317	19345	Rab5c	Rab5c	ENSMUSP00000108723	66691	Gapvd1	Gapvd1	961
ENSMUSP00000019317	19345	Rab5c	Rab5c	ENSMUSP00000070958	11607	Agtr1a	Agtr1a	908
ENSMUSP00000019317	19345	Rab5c	Rab5c	ENSMUSP00000120096	22186	Uba52	Uba52	901
ENSMUSP00000019317	19345	Rab5c	Rab5c	ENSMUSP00000108075	58194	Sh3kbp1	Sh3kbp1	915
ENSMUSP00000019317	19345	Rab5c	Rab5c	ENSMUSP00000130098	23970	Pacsin2	Pacsin2	930
ENSMUSP00000019317	19345	Rab5c	Rab5c	ENSMUSP00000099584	56378	Arpc3	Arpc3	906
ENSMUSP00000019317	19345	Rab5c	Rab5c	ENSMUSP00000021273	22318	Vamp2	Vamp2	915
ENSMUSP00000019317	19345	Rab5c	Rab5c	ENSMUSP00000029257	76295	Atp11b	Atp11b	904
ENSMUSP00000019323	17448	Mdh2	Mdh2	ENSMUSP00000056502	15929	Idh3g	Idh3g	747
ENSMUSP00000019323	17448	Mdh2	Mdh2	ENSMUSP00000023043	11564	Adsl	Adsl	850
ENSMUSP00000019323	17448	Mdh2	Mdh2	ENSMUSP00000101003	75406	Ndufs7	Ndufs7	760
ENSMUSP00000019323	17448	Mdh2	Mdh2	ENSMUSP00000127526	67834	Idh3a	Idh3a	879
ENSMUSP00000019323	17448	Mdh2	Mdh2	ENSMUSP00000026743	22273	Uqcrc1	Uqcrc1	919
ENSMUSP00000019323	17448	Mdh2	Mdh2	ENSMUSP00000034834	18746	Pkm	Pkm	835
ENSMUSP00000019323	17448	Mdh2	Mdh2	ENSMUSP00000136544	18655	Pgk1	Pgk1	749
ENSMUSP00000019323	17448	Mdh2	Mdh2	ENSMUSP00000103007	269951	Idh2	Idh2	900
ENSMUSP00000019323	17448	Mdh2	Mdh2	ENSMUSP00000059404	19290	Pura	Pura	770
ENSMUSP00000019649	22187	Ubb	Ubb	ENSMUSP00000099436	26446	Psmb3	Psmb3	946
ENSMUSP00000019649	22187	Ubb	Ubb	ENSMUSP00000072155	72607	Usp13	Usp13	766
ENSMUSP00000019649	22187	Ubb	Ubb	ENSMUSP00000124093	252870	Usp7	Usp7	821
ENSMUSP00000019649	22187	Ubb	Ubb	ENSMUSP00000023507	56637	Gsk3b	Gsk3b	912
ENSMUSP00000019649	22187	Ubb	Ubb	ENSMUSP00000038813	67615	Ube2r2	Ube2r2	747
ENSMUSP00000019649	22187	Ubb	Ubb	ENSMUSP00000120096	22186	Uba52	Uba52	942
ENSMUSP00000019649	22187	Ubb	Ubb	ENSMUSP00000108075	58194	Sh3kbp1	Sh3kbp1	780
ENSMUSP00000019649	22187	Ubb	Ubb	ENSMUSP00000135215	319148	H3c3	H3c3	904
ENSMUSP00000019649	22187	Ubb	Ubb	ENSMUSP00000136357	319155	H4c3	H4c3	853
ENSMUSP00000019649	22187	Ubb	Ubb	ENSMUSP00000028278	59029	Psmd14	Psmd14	970
ENSMUSP00000019649	22187	Ubb	Ubb	ENSMUSP00000140394	319152	H3c10	H3c10	941
ENSMUSP00000019649	22187	Ubb	Ubb	ENSMUSP00000030769	19181	Psmc2	Psmc2	814
ENSMUSP00000019722	66530	Ubxn6	Ubxn6	ENSMUSP00000121182	76577	Faf2	Faf2	824
ENSMUSP00000019998	64058	Perp	Perp	ENSMUSP00000115062	109620	Dsp	Dsp	970
ENSMUSP00000019998	64058	Perp	Perp	ENSMUSP00000036890	67451	Pkp2	Pkp2	926
ENSMUSP00000020101	69288	Rhobtb1	Rhobtb1	ENSMUSP00000039427	544817	Arhgap27	Arhgap27	936
ENSMUSP00000020101	69288	Rhobtb1	Rhobtb1	ENSMUSP00000024956	104215	Rhoq	Rhoq	910
ENSMUSP00000020258	67345	Herc4	Herc4	ENSMUSP00000140967	69010	Anapc13	Anapc13	900
ENSMUSP00000020258	67345	Herc4	Herc4	ENSMUSP00000083393	59008	Anapc5	Anapc5	902
ENSMUSP00000020258	67345	Herc4	Herc4	ENSMUSP00000125745	84585	Rnf123	Rnf123	904
ENSMUSP00000020258	67345	Herc4	Herc4	ENSMUSP00000038813	67615	Ube2r2	Ube2r2	939
ENSMUSP00000020258	67345	Herc4	Herc4	ENSMUSP00000026093	83962	Btbd1	Btbd1	904
ENSMUSP00000020258	67345	Herc4	Herc4	ENSMUSP00000120096	22186	Uba52	Uba52	922
ENSMUSP00000020258	67345	Herc4	Herc4	ENSMUSP00000100058	22214	Ube2h	Ube2h	913
ENSMUSP00000020258	67345	Herc4	Herc4	ENSMUSP00000074204	22378	Wbp2	Wbp2	702
ENSMUSP00000020258	67345	Herc4	Herc4	ENSMUSP00000037055	211007	Trim41	Trim41	906
ENSMUSP00000020258	67345	Herc4	Herc4	ENSMUSP00000058233	269529	Fbxo10	Fbxo10	900
ENSMUSP00000020702	16009	Igfbp3	Igfbp3	ENSMUSP00000064801	338366	Mia3	Mia3	900
ENSMUSP00000020702	16009	Igfbp3	Igfbp3	ENSMUSP00000033828	14456	Gas6	Gas6	916
ENSMUSP00000020702	16009	Igfbp3	Igfbp3	ENSMUSP00000031779	12321	Calu	Calu	905
ENSMUSP00000020702	16009	Igfbp3	Igfbp3	ENSMUSP00000028938	13010	Cst3	Cst3	910
ENSMUSP00000020702	16009	Igfbp3	Igfbp3	ENSMUSP00000025166	12558	Cdh2	Cdh2	921
ENSMUSP00000020702	16009	Igfbp3	Igfbp3	ENSMUSP00000029846	16007	Ccn1	Ccn1	940
ENSMUSP00000021116	217331	Unk	Unk	ENSMUSP00000086716	22284	Usp9x	Usp9x	775
ENSMUSP00000021273	22318	Vamp2	Vamp2	ENSMUSP00000130874	243764	Chrm2	Chrm2	907
ENSMUSP00000021273	22318	Vamp2	Vamp2	ENSMUSP00000137503	74117	Actr3	Actr3	906
ENSMUSP00000021273	22318	Vamp2	Vamp2	ENSMUSP00000025563	14319	Fth1	Fth1	905
ENSMUSP00000021273	22318	Vamp2	Vamp2	ENSMUSP00000082489	72961	Slc17a7	Slc17a7	971
ENSMUSP00000021273	22318	Vamp2	Vamp2	ENSMUSP00000057462	53612	Vti1b	Vti1b	956
ENSMUSP00000021273	22318	Vamp2	Vamp2	ENSMUSP00000108723	66691	Gapvd1	Gapvd1	901
ENSMUSP00000021273	22318	Vamp2	Vamp2	ENSMUSP00000070958	11607	Agtr1a	Agtr1a	900
ENSMUSP00000021273	22318	Vamp2	Vamp2	ENSMUSP00000120096	22186	Uba52	Uba52	905
ENSMUSP00000021273	22318	Vamp2	Vamp2	ENSMUSP00000108075	58194	Sh3kbp1	Sh3kbp1	904
ENSMUSP00000021273	22318	Vamp2	Vamp2	ENSMUSP00000026405	14533	Bloc1s1	Bloc1s1	917
ENSMUSP00000021273	22318	Vamp2	Vamp2	ENSMUSP00000130098	23970	Pacsin2	Pacsin2	900
ENSMUSP00000021273	22318	Vamp2	Vamp2	ENSMUSP00000099584	56378	Arpc3	Arpc3	901
ENSMUSP00000021447	26932	Ppp2r5e	Ppp2r5e	ENSMUSP00000099436	26446	Psmb3	Psmb3	901
ENSMUSP00000021447	26932	Ppp2r5e	Ppp2r5e	ENSMUSP00000120096	22186	Uba52	Uba52	900
ENSMUSP00000021447	26932	Ppp2r5e	Ppp2r5e	ENSMUSP00000023359	67203	Nde1	Nde1	903
ENSMUSP00000021447	26932	Ppp2r5e	Ppp2r5e	ENSMUSP00000025421	72124	Seh1l	Seh1l	905
ENSMUSP00000021447	26932	Ppp2r5e	Ppp2r5e	ENSMUSP00000023507	56637	Gsk3b	Gsk3b	930
ENSMUSP00000021447	26932	Ppp2r5e	Ppp2r5e	ENSMUSP00000106789	23797	Akt3	Akt3	942
ENSMUSP00000021447	26932	Ppp2r5e	Ppp2r5e	ENSMUSP00000028278	59029	Psmd14	Psmd14	903
ENSMUSP00000021447	26932	Ppp2r5e	Ppp2r5e	ENSMUSP00000029445	16653	Kras	Kras	907
ENSMUSP00000021447	26932	Ppp2r5e	Ppp2r5e	ENSMUSP00000030769	19181	Psmc2	Psmc2	902
ENSMUSP00000021447	26932	Ppp2r5e	Ppp2r5e	ENSMUSP00000088837	16337	Insr	Insr	914
ENSMUSP00000021447	26932	Ppp2r5e	Ppp2r5e	ENSMUSP00000030665	18221	Nudc	Nudc	901
ENSMUSP00000021506	20716	Serpina3n	Serpina3n	ENSMUSP00000022169	15212	Hexb	Hexb	901
ENSMUSP00000021506	20716	Serpina3n	Serpina3n	ENSMUSP00000023994	12258	Serping1	Serping1	956
ENSMUSP00000021506	20716	Serpina3n	Serpina3n	ENSMUSP00000057462	53612	Vti1b	Vti1b	900
ENSMUSP00000021506	20716	Serpina3n	Serpina3n	ENSMUSP00000121182	76577	Faf2	Faf2	919
ENSMUSP00000021506	20716	Serpina3n	Serpina3n	ENSMUSP00000025914	22340	Vegfb	Vegfb	900
ENSMUSP00000021506	20716	Serpina3n	Serpina3n	ENSMUSP00000033828	14456	Gas6	Gas6	910
ENSMUSP00000021940	66890	Lman2	Lman2	ENSMUSP00000092157	69162	Sec31a	Sec31a	922
ENSMUSP00000022169	15212	Hexb	Hexb	ENSMUSP00000121182	76577	Faf2	Faf2	900
ENSMUSP00000022228	67285	Cwc27	Cwc27	ENSMUSP00000039406	233073	U2af1l4	U2af1l4	902
ENSMUSP00000022228	67285	Cwc27	Cwc27	ENSMUSP00000037268	232989	Hnrnpul1	Hnrnpul1	906
ENSMUSP00000022228	67285	Cwc27	Cwc27	ENSMUSP00000038505	20022	Polr2j	Polr2j	905
ENSMUSP00000022228	67285	Cwc27	Cwc27	ENSMUSP00000107595	545592	Gm11847	Gm11847	939
ENSMUSP00000022327	24131	Ldb3	Ldb3	ENSMUSP00000125995	17189	Mb	Mb	713
ENSMUSP00000022327	24131	Ldb3	Ldb3	ENSMUSP00000109633	13405	Dmd	Dmd	777
ENSMUSP00000022327	24131	Ldb3	Ldb3	ENSMUSP00000107717	21956	Tnnt2	Tnnt2	777
ENSMUSP00000022327	24131	Ldb3	Ldb3	ENSMUSP00000127070	17868	Mybpc3	Mybpc3	744
ENSMUSP00000022327	24131	Ldb3	Ldb3	ENSMUSP00000097561	22138	Ttn	Ttn	931
ENSMUSP00000022327	24131	Ldb3	Ldb3	ENSMUSP00000044936	378431	Txlnb	Txlnb	769
ENSMUSP00000022480	239017	Ogdhl	Ogdhl	ENSMUSP00000056502	15929	Idh3g	Idh3g	949
ENSMUSP00000022480	239017	Ogdhl	Ogdhl	ENSMUSP00000023043	11564	Adsl	Adsl	826
ENSMUSP00000022480	239017	Ogdhl	Ogdhl	ENSMUSP00000127526	67834	Idh3a	Idh3a	971
ENSMUSP00000022480	239017	Ogdhl	Ogdhl	ENSMUSP00000034136	108682	Gpt2	Gpt2	830
ENSMUSP00000022480	239017	Ogdhl	Ogdhl	ENSMUSP00000103007	269951	Idh2	Idh2	946
ENSMUSP00000023043	11564	Adsl	Adsl	ENSMUSP00000112991	238871	Pde4d	Pde4d	904
ENSMUSP00000023043	11564	Adsl	Adsl	ENSMUSP00000056502	15929	Idh3g	Idh3g	846
ENSMUSP00000023043	11564	Adsl	Adsl	ENSMUSP00000102559	11639	Ak4	Ak4	947
ENSMUSP00000023043	11564	Adsl	Adsl	ENSMUSP00000127526	67834	Idh3a	Idh3a	856
ENSMUSP00000023043	11564	Adsl	Adsl	ENSMUSP00000103007	269951	Idh2	Idh2	872
ENSMUSP00000023043	11564	Adsl	Adsl	ENSMUSP00000046601	18575	Pde1c	Pde1c	902
ENSMUSP00000023043	11564	Adsl	Adsl	ENSMUSP00000031160	67054	Paics	Paics	997
ENSMUSP00000023085	67130	Ndufa6	Ndufa6	ENSMUSP00000047661	12861	Cox6a1	Cox6a1	944
ENSMUSP00000023085	67130	Ndufa6	Ndufa6	ENSMUSP00000079944	12859	Cox5b	Cox5b	878
ENSMUSP00000023085	67130	Ndufa6	Ndufa6	ENSMUSP00000023851	68202	Ndufa5	Ndufa5	999
ENSMUSP00000023085	67130	Ndufa6	Ndufa6	ENSMUSP00000037341	66916	Ndufb7	Ndufb7	999
ENSMUSP00000023085	67130	Ndufa6	Ndufa6	ENSMUSP00000101003	75406	Ndufs7	Ndufs7	999
ENSMUSP00000023085	67130	Ndufa6	Ndufa6	ENSMUSP00000028768	69702	Ndufaf1	Ndufaf1	961
ENSMUSP00000023085	67130	Ndufa6	Ndufa6	ENSMUSP00000112320	104130	Ndufb11	Ndufb11	999
ENSMUSP00000023085	67130	Ndufa6	Ndufa6	ENSMUSP00000026743	22273	Uqcrc1	Uqcrc1	989
ENSMUSP00000023085	67130	Ndufa6	Ndufa6	ENSMUSP00000075150	110323	Cox6b1	Cox6b1	790
ENSMUSP00000023085	67130	Ndufa6	Ndufa6	ENSMUSP00000125504	57423	Atp5j2	Atp5j2	933
ENSMUSP00000023104	71919	Rpap3	Rpap3	ENSMUSP00000025163	14976	Pfdn6	Pfdn6	759
ENSMUSP00000023161	106393	Srl	Srl	ENSMUSP00000107717	21956	Tnnt2	Tnnt2	771
ENSMUSP00000023161	106393	Srl	Srl	ENSMUSP00000097561	22138	Ttn	Ttn	757
ENSMUSP00000023165	12914	Crebbp	Crebbp	ENSMUSP00000051432	15270	H2ax	H2ax	978
ENSMUSP00000023165	12914	Crebbp	Crebbp	ENSMUSP00000135215	319148	H3c3	H3c3	993
ENSMUSP00000023165	12914	Crebbp	Crebbp	ENSMUSP00000136357	319155	H4c3	H4c3	956
ENSMUSP00000023165	12914	Crebbp	Crebbp	ENSMUSP00000088935	22218	Sumo1	Sumo1	986
ENSMUSP00000023165	12914	Crebbp	Crebbp	ENSMUSP00000140394	319152	H3c10	H3c10	952
ENSMUSP00000023165	12914	Crebbp	Crebbp	ENSMUSP00000038505	20022	Polr2j	Polr2j	902
ENSMUSP00000023269	68193	Rpl24	Rpl24	ENSMUSP00000058432	66481	Rps21	Rps21	993
ENSMUSP00000023269	68193	Rpl24	Rpl24	ENSMUSP00000086614	68436	Rpl34	Rpl34	987
ENSMUSP00000023269	68193	Rpl24	Rpl24	ENSMUSP00000102213	67671	Rpl38	Rpl38	996
ENSMUSP00000023269	68193	Rpl24	Rpl24	ENSMUSP00000099435	65019	Rpl23	Rpl23	998
ENSMUSP00000023269	68193	Rpl24	Rpl24	ENSMUSP00000120096	22186	Uba52	Uba52	992
ENSMUSP00000023269	68193	Rpl24	Rpl24	ENSMUSP00000035105	16785	Rpsa	Rpsa	985
ENSMUSP00000023269	68193	Rpl24	Rpl24	ENSMUSP00000046101	13629	Eef2	Eef2	973
ENSMUSP00000023269	68193	Rpl24	Rpl24	ENSMUSP00000080854	100503670	Rpl5	Rpl5	994
ENSMUSP00000023269	68193	Rpl24	Rpl24	ENSMUSP00000110013	54127	Rps28	Rps28	996
ENSMUSP00000023269	68193	Rpl24	Rpl24	ENSMUSP00000113116	16430	Stt3a	Stt3a	721
ENSMUSP00000023269	68193	Rpl24	Rpl24	ENSMUSP00000034966	67891	Rpl4	Rpl4	992
ENSMUSP00000023269	68193	Rpl24	Rpl24	ENSMUSP00000078654	319195	Rpl17	Rpl17	994
ENSMUSP00000023269	68193	Rpl24	Rpl24	ENSMUSP00000034738	225215	Rsl24d1	Rsl24d1	889
ENSMUSP00000023269	68193	Rpl24	Rpl24	ENSMUSP00000108837	19982	Rpl36a	Rpl36a	997
ENSMUSP00000023269	68193	Rpl24	Rpl24	ENSMUSP00000032597	19943	Rpl28	Rpl28	983
ENSMUSP00000023269	68193	Rpl24	Rpl24	ENSMUSP00000058368	76808	Rpl18a	Rpl18a	982
ENSMUSP00000023269	68193	Rpl24	Rpl24	ENSMUSP00000071652	20090	Rps29	Rps29	923
ENSMUSP00000023269	68193	Rpl24	Rpl24	ENSMUSP00000106336	100101806	Srp54c	Srp54c	812
ENSMUSP00000023359	67203	Nde1	Nde1	ENSMUSP00000025421	72124	Seh1l	Seh1l	900
ENSMUSP00000023359	67203	Nde1	Nde1	ENSMUSP00000081912	101706	Numa1	Numa1	934
ENSMUSP00000023359	67203	Nde1	Nde1	ENSMUSP00000030665	18221	Nudc	Nudc	965
ENSMUSP00000023359	67203	Nde1	Nde1	ENSMUSP00000039709	18536	Pcm1	Pcm1	948
ENSMUSP00000023507	56637	Gsk3b	Gsk3b	ENSMUSP00000099436	26446	Psmb3	Psmb3	905
ENSMUSP00000023507	56637	Gsk3b	Gsk3b	ENSMUSP00000069851	320404	Itpkb	Itpkb	838
ENSMUSP00000023507	56637	Gsk3b	Gsk3b	ENSMUSP00000060858	20019	Polr1a	Polr1a	902
ENSMUSP00000023507	56637	Gsk3b	Gsk3b	ENSMUSP00000106789	23797	Akt3	Akt3	978
ENSMUSP00000023507	56637	Gsk3b	Gsk3b	ENSMUSP00000120096	22186	Uba52	Uba52	907
ENSMUSP00000023507	56637	Gsk3b	Gsk3b	ENSMUSP00000028278	59029	Psmd14	Psmd14	915
ENSMUSP00000023507	56637	Gsk3b	Gsk3b	ENSMUSP00000030769	19181	Psmc2	Psmc2	905
ENSMUSP00000023538	107589	Mylk	Mylk	ENSMUSP00000123412	67268	Myl12a	Myl12a	960
ENSMUSP00000023538	107589	Mylk	Mylk	ENSMUSP00000099985	17898	Myl7	Myl7	971
ENSMUSP00000023687	15980	Ifngr2	Ifngr2	ENSMUSP00000099842	16451	Jak1	Jak1	979
ENSMUSP00000023851	68202	Ndufa5	Ndufa5	ENSMUSP00000113761	56330	Pdcd5	Pdcd5	773
ENSMUSP00000023851	68202	Ndufa5	Ndufa5	ENSMUSP00000047661	12861	Cox6a1	Cox6a1	907
ENSMUSP00000023851	68202	Ndufa5	Ndufa5	ENSMUSP00000079944	12859	Cox5b	Cox5b	830
ENSMUSP00000023851	68202	Ndufa5	Ndufa5	ENSMUSP00000037341	66916	Ndufb7	Ndufb7	999
ENSMUSP00000023851	68202	Ndufa5	Ndufa5	ENSMUSP00000101003	75406	Ndufs7	Ndufs7	999
ENSMUSP00000023851	68202	Ndufa5	Ndufa5	ENSMUSP00000028768	69702	Ndufaf1	Ndufaf1	933
ENSMUSP00000023851	68202	Ndufa5	Ndufa5	ENSMUSP00000112320	104130	Ndufb11	Ndufb11	998
ENSMUSP00000023851	68202	Ndufa5	Ndufa5	ENSMUSP00000026743	22273	Uqcrc1	Uqcrc1	989
ENSMUSP00000023851	68202	Ndufa5	Ndufa5	ENSMUSP00000075150	110323	Cox6b1	Cox6b1	743
ENSMUSP00000023851	68202	Ndufa5	Ndufa5	ENSMUSP00000125504	57423	Atp5j2	Atp5j2	928
ENSMUSP00000023869	68184	Denr	Denr	ENSMUSP00000058432	66481	Rps21	Rps21	774
ENSMUSP00000023869	68184	Denr	Denr	ENSMUSP00000102213	67671	Rpl38	Rpl38	714
ENSMUSP00000023869	68184	Denr	Denr	ENSMUSP00000035105	16785	Rpsa	Rpsa	735
ENSMUSP00000023869	68184	Denr	Denr	ENSMUSP00000110013	54127	Rps28	Rps28	740
ENSMUSP00000023994	12258	Serping1	Serping1	ENSMUSP00000033828	14456	Gas6	Gas6	911
ENSMUSP00000023994	12258	Serping1	Serping1	ENSMUSP00000107607	12628	Cfh	Cfh	749
ENSMUSP00000023994	12258	Serping1	Serping1	ENSMUSP00000057462	53612	Vti1b	Vti1b	900
ENSMUSP00000023994	12258	Serping1	Serping1	ENSMUSP00000025914	22340	Vegfb	Vegfb	900
ENSMUSP00000024956	104215	Rhoq	Rhoq	ENSMUSP00000039427	544817	Arhgap27	Arhgap27	938
ENSMUSP00000025163	14976	Pfdn6	Pfdn6	ENSMUSP00000113761	56330	Pdcd5	Pdcd5	742
ENSMUSP00000025163	14976	Pfdn6	Pfdn6	ENSMUSP00000129178	56612	Pfdn5	Pfdn5	997
ENSMUSP00000025166	12558	Cdh2	Cdh2	ENSMUSP00000115062	109620	Dsp	Dsp	700
ENSMUSP00000025166	12558	Cdh2	Cdh2	ENSMUSP00000031779	12321	Calu	Calu	913
ENSMUSP00000025166	12558	Cdh2	Cdh2	ENSMUSP00000036890	67451	Pkp2	Pkp2	700
ENSMUSP00000025166	12558	Cdh2	Cdh2	ENSMUSP00000028938	13010	Cst3	Cst3	912
ENSMUSP00000025166	12558	Cdh2	Cdh2	ENSMUSP00000029846	16007	Ccn1	Ccn1	926
ENSMUSP00000025166	12558	Cdh2	Cdh2	ENSMUSP00000086207	29857	Mapk12	Mapk12	901
ENSMUSP00000025166	12558	Cdh2	Cdh2	ENSMUSP00000064801	338366	Mia3	Mia3	900
ENSMUSP00000025166	12558	Cdh2	Cdh2	ENSMUSP00000033828	14456	Gas6	Gas6	924
ENSMUSP00000025166	12558	Cdh2	Cdh2	ENSMUSP00000049007	12385	Ctnna1	Ctnna1	980
ENSMUSP00000025421	72124	Seh1l	Seh1l	ENSMUSP00000088935	22218	Sumo1	Sumo1	934
ENSMUSP00000025421	72124	Seh1l	Seh1l	ENSMUSP00000030665	18221	Nudc	Nudc	902
ENSMUSP00000025563	14319	Fth1	Fth1	ENSMUSP00000121203	13033	Ctsd	Ctsd	926
ENSMUSP00000025563	14319	Fth1	Fth1	ENSMUSP00000100038	11428	Aco1	Aco1	787
ENSMUSP00000025563	14319	Fth1	Fth1	ENSMUSP00000028938	13010	Cst3	Cst3	924
ENSMUSP00000025563	14319	Fth1	Fth1	ENSMUSP00000126071	53600	Timm23	Timm23	940
ENSMUSP00000025914	22340	Vegfb	Vegfb	ENSMUSP00000099862	21687	Tek	Tek	867
ENSMUSP00000025914	22340	Vegfb	Vegfb	ENSMUSP00000033828	14456	Gas6	Gas6	908
ENSMUSP00000025914	22340	Vegfb	Vegfb	ENSMUSP00000057462	53612	Vti1b	Vti1b	902
ENSMUSP00000026009	56350	Arl3	Arl3	ENSMUSP00000035992	106039	Gga1	Gga1	724
ENSMUSP00000026093	83962	Btbd1	Btbd1	ENSMUSP00000034775	14155	Fem1b	Fem1b	905
ENSMUSP00000026093	83962	Btbd1	Btbd1	ENSMUSP00000120096	22186	Uba52	Uba52	900
ENSMUSP00000026093	83962	Btbd1	Btbd1	ENSMUSP00000140967	69010	Anapc13	Anapc13	900
ENSMUSP00000026093	83962	Btbd1	Btbd1	ENSMUSP00000083393	59008	Anapc5	Anapc5	900
ENSMUSP00000026093	83962	Btbd1	Btbd1	ENSMUSP00000125745	84585	Rnf123	Rnf123	900
ENSMUSP00000026093	83962	Btbd1	Btbd1	ENSMUSP00000100058	22214	Ube2h	Ube2h	902
ENSMUSP00000026093	83962	Btbd1	Btbd1	ENSMUSP00000038813	67615	Ube2r2	Ube2r2	902
ENSMUSP00000026093	83962	Btbd1	Btbd1	ENSMUSP00000037055	211007	Trim41	Trim41	903
ENSMUSP00000026093	83962	Btbd1	Btbd1	ENSMUSP00000058233	269529	Fbxo10	Fbxo10	901
ENSMUSP00000026093	83962	Btbd1	Btbd1	ENSMUSP00000038591	56468	Socs5	Socs5	904
ENSMUSP00000026289	15108	Hsd17b10	Hsd17b10	ENSMUSP00000034552	14148	Fdx1	Fdx1	743
ENSMUSP00000026387	66711	Sbds	Sbds	ENSMUSP00000046101	13629	Eef2	Eef2	723
ENSMUSP00000026699	27418	Mkln1	Mkln1	ENSMUSP00000130636	56705	Ranbp9	Ranbp9	899
ENSMUSP00000026743	22273	Uqcrc1	Uqcrc1	ENSMUSP00000079944	12859	Cox5b	Cox5b	995
ENSMUSP00000026743	22273	Uqcrc1	Uqcrc1	ENSMUSP00000101003	75406	Ndufs7	Ndufs7	998
ENSMUSP00000026743	22273	Uqcrc1	Uqcrc1	ENSMUSP00000127526	67834	Idh3a	Idh3a	705
ENSMUSP00000026743	22273	Uqcrc1	Uqcrc1	ENSMUSP00000080993	17721	ND5	ND5	971
ENSMUSP00000026743	22273	Uqcrc1	Uqcrc1	ENSMUSP00000028768	69702	Ndufaf1	Ndufaf1	914
ENSMUSP00000026743	22273	Uqcrc1	Uqcrc1	ENSMUSP00000047661	12861	Cox6a1	Cox6a1	960
ENSMUSP00000026743	22273	Uqcrc1	Uqcrc1	ENSMUSP00000075150	110323	Cox6b1	Cox6b1	887
ENSMUSP00000026743	22273	Uqcrc1	Uqcrc1	ENSMUSP00000037341	66916	Ndufb7	Ndufb7	996
ENSMUSP00000026743	22273	Uqcrc1	Uqcrc1	ENSMUSP00000112320	104130	Ndufb11	Ndufb11	979
ENSMUSP00000027438	17975	Ncl	Ncl	ENSMUSP00000102368	68979	Nol11	Nol11	920
ENSMUSP00000027438	17975	Ncl	Ncl	ENSMUSP00000075067	18148	Npm1	Npm1	984
ENSMUSP00000028207	12908	Crat	Crat	ENSMUSP00000120096	22186	Uba52	Uba52	900
ENSMUSP00000028207	12908	Crat	Crat	ENSMUSP00000047778	110959	Nudt19	Nudt19	900
ENSMUSP00000028207	12908	Crat	Crat	ENSMUSP00000063325	11430	Acox1	Acox1	956
ENSMUSP00000028252	50915	Grb14	Grb14	ENSMUSP00000099862	21687	Tek	Tek	973
ENSMUSP00000028252	50915	Grb14	Grb14	ENSMUSP00000088837	16337	Insr	Insr	811
ENSMUSP00000028278	59029	Psmd14	Psmd14	ENSMUSP00000099436	26446	Psmb3	Psmb3	988
ENSMUSP00000028278	59029	Psmd14	Psmd14	ENSMUSP00000083393	59008	Anapc5	Anapc5	914
ENSMUSP00000028278	59029	Psmd14	Psmd14	ENSMUSP00000120096	22186	Uba52	Uba52	994
ENSMUSP00000028278	59029	Psmd14	Psmd14	ENSMUSP00000030769	19181	Psmc2	Psmc2	999
ENSMUSP00000028768	69702	Ndufaf1	Ndufaf1	ENSMUSP00000037341	66916	Ndufb7	Ndufb7	941
ENSMUSP00000028768	69702	Ndufaf1	Ndufaf1	ENSMUSP00000101003	75406	Ndufs7	Ndufs7	970
ENSMUSP00000028768	69702	Ndufaf1	Ndufaf1	ENSMUSP00000112320	104130	Ndufb11	Ndufb11	975
ENSMUSP00000028938	13010	Cst3	Cst3	ENSMUSP00000064801	338366	Mia3	Mia3	900
ENSMUSP00000028938	13010	Cst3	Cst3	ENSMUSP00000121203	13033	Ctsd	Ctsd	959
ENSMUSP00000028938	13010	Cst3	Cst3	ENSMUSP00000033828	14456	Gas6	Gas6	910
ENSMUSP00000028938	13010	Cst3	Cst3	ENSMUSP00000031779	12321	Calu	Calu	900
ENSMUSP00000028938	13010	Cst3	Cst3	ENSMUSP00000029846	16007	Ccn1	Ccn1	921
ENSMUSP00000028977	16569	Kif3b	Kif3b	ENSMUSP00000105304	67068	Dynlrb1	Dynlrb1	908
ENSMUSP00000028977	16569	Kif3b	Kif3b	ENSMUSP00000031426	12589	Ift81	Ift81	958
ENSMUSP00000028977	16569	Kif3b	Kif3b	ENSMUSP00000118179	12847	Copa	Copa	901
ENSMUSP00000028977	16569	Kif3b	Kif3b	ENSMUSP00000029092	228998	Arfgap1	Arfgap1	903
ENSMUSP00000029092	228998	Arfgap1	Arfgap1	ENSMUSP00000118179	12847	Copa	Copa	931
ENSMUSP00000029128	66734	Map1lc3a	Map1lc3a	ENSMUSP00000119369	56208	Becn1	Becn1	994
ENSMUSP00000029128	66734	Map1lc3a	Map1lc3a	ENSMUSP00000081764	17281	Fyco1	Fyco1	979
ENSMUSP00000029128	66734	Map1lc3a	Map1lc3a	ENSMUSP00000139608	245860	Atg9a	Atg9a	842
ENSMUSP00000029445	16653	Kras	Kras	ENSMUSP00000069851	320404	Itpkb	Itpkb	702
ENSMUSP00000029445	16653	Kras	Kras	ENSMUSP00000099862	21687	Tek	Tek	908
ENSMUSP00000029445	16653	Kras	Kras	ENSMUSP00000030645	194231	Cnksr1	Cnksr1	916
ENSMUSP00000029445	16653	Kras	Kras	ENSMUSP00000099842	16451	Jak1	Jak1	948
ENSMUSP00000029445	16653	Kras	Kras	ENSMUSP00000120096	22186	Uba52	Uba52	901
ENSMUSP00000029445	16653	Kras	Kras	ENSMUSP00000130636	56705	Ranbp9	Ranbp9	912
ENSMUSP00000029445	16653	Kras	Kras	ENSMUSP00000057543	14678	Gnai2	Gnai2	867
ENSMUSP00000029644	74776	Ppa2	Ppa2	ENSMUSP00000125504	57423	Atp5j2	Atp5j2	741
ENSMUSP00000029644	74776	Ppa2	Ppa2	ENSMUSP00000140414	67942	Atp5g2	Atp5g2	755
ENSMUSP00000029838	70285	Rpf1	Rpf1	ENSMUSP00000060858	20019	Polr1a	Polr1a	710
ENSMUSP00000029838	70285	Rpf1	Rpf1	ENSMUSP00000058785	18114	Rrp1	Rrp1	972
ENSMUSP00000029838	70285	Rpf1	Rpf1	ENSMUSP00000043981	68077	Nop53	Nop53	849
ENSMUSP00000029838	70285	Rpf1	Rpf1	ENSMUSP00000034738	225215	Rsl24d1	Rsl24d1	951
ENSMUSP00000029846	16007	Ccn1	Ccn1	ENSMUSP00000064801	338366	Mia3	Mia3	900
ENSMUSP00000029846	16007	Ccn1	Ccn1	ENSMUSP00000033828	14456	Gas6	Gas6	934
ENSMUSP00000029846	16007	Ccn1	Ccn1	ENSMUSP00000031779	12321	Calu	Calu	906
ENSMUSP00000030665	18221	Nudc	Nudc	ENSMUSP00000031160	67054	Paics	Paics	760
ENSMUSP00000030675	66407	Mrps15	Mrps15	ENSMUSP00000058432	66481	Rps21	Rps21	883
ENSMUSP00000030675	66407	Mrps15	Mrps15	ENSMUSP00000086614	68436	Rpl34	Rpl34	729
ENSMUSP00000030675	66407	Mrps15	Mrps15	ENSMUSP00000102213	67671	Rpl38	Rpl38	873
ENSMUSP00000030675	66407	Mrps15	Mrps15	ENSMUSP00000099435	65019	Rpl23	Rpl23	894
ENSMUSP00000030675	66407	Mrps15	Mrps15	ENSMUSP00000035105	16785	Rpsa	Rpsa	766
ENSMUSP00000030675	66407	Mrps15	Mrps15	ENSMUSP00000080854	100503670	Rpl5	Rpl5	894
ENSMUSP00000030675	66407	Mrps15	Mrps15	ENSMUSP00000110013	54127	Rps28	Rps28	762
ENSMUSP00000030675	66407	Mrps15	Mrps15	ENSMUSP00000039951	66047	Mrpl54	Mrpl54	984
ENSMUSP00000030675	66407	Mrps15	Mrps15	ENSMUSP00000034966	67891	Rpl4	Rpl4	749
ENSMUSP00000030675	66407	Mrps15	Mrps15	ENSMUSP00000078654	319195	Rpl17	Rpl17	703
ENSMUSP00000030675	66407	Mrps15	Mrps15	ENSMUSP00000108837	19982	Rpl36a	Rpl36a	782
ENSMUSP00000030675	66407	Mrps15	Mrps15	ENSMUSP00000035177	94062	Mrpl3	Mrpl3	996
ENSMUSP00000030675	66407	Mrps15	Mrps15	ENSMUSP00000032597	19943	Rpl28	Rpl28	757
ENSMUSP00000030675	66407	Mrps15	Mrps15	ENSMUSP00000075226	67270	Mrpl42	Mrpl42	970
ENSMUSP00000030675	66407	Mrps15	Mrps15	ENSMUSP00000058368	76808	Rpl18a	Rpl18a	785
ENSMUSP00000030675	66407	Mrps15	Mrps15	ENSMUSP00000071652	20090	Rps29	Rps29	735
ENSMUSP00000030675	66407	Mrps15	Mrps15	ENSMUSP00000076503	28030	Gfm1	Gfm1	959
ENSMUSP00000030769	19181	Psmc2	Psmc2	ENSMUSP00000099436	26446	Psmb3	Psmb3	998
ENSMUSP00000030769	19181	Psmc2	Psmc2	ENSMUSP00000083393	59008	Anapc5	Anapc5	912
ENSMUSP00000030769	19181	Psmc2	Psmc2	ENSMUSP00000099435	65019	Rpl23	Rpl23	849
ENSMUSP00000030769	19181	Psmc2	Psmc2	ENSMUSP00000120096	22186	Uba52	Uba52	974
ENSMUSP00000030769	19181	Psmc2	Psmc2	ENSMUSP00000080854	100503670	Rpl5	Rpl5	810
ENSMUSP00000031426	12589	Ift81	Ift81	ENSMUSP00000105304	67068	Dynlrb1	Dynlrb1	909
ENSMUSP00000031524	11409	Acads	Acads	ENSMUSP00000063325	11430	Acox1	Acox1	862
ENSMUSP00000031779	12321	Calu	Calu	ENSMUSP00000064801	338366	Mia3	Mia3	902
ENSMUSP00000031779	12321	Calu	Calu	ENSMUSP00000033828	14456	Gas6	Gas6	906
ENSMUSP00000031862	12417	Cbx3	Cbx3	ENSMUSP00000051432	15270	H2ax	H2ax	936
ENSMUSP00000031862	12417	Cbx3	Cbx3	ENSMUSP00000045816	50708	H1f2	H1f2	713
ENSMUSP00000031862	12417	Cbx3	Cbx3	ENSMUSP00000135215	319148	H3c3	H3c3	993
ENSMUSP00000031862	12417	Cbx3	Cbx3	ENSMUSP00000140394	319152	H3c10	H3c10	951
ENSMUSP00000032151	66892	Eif4e3	Eif4e3	ENSMUSP00000124551	13690	Eif4g2	Eif4g2	959
ENSMUSP00000032192	16438	Itpr1	Itpr1	ENSMUSP00000069851	320404	Itpkb	Itpkb	757
ENSMUSP00000032192	16438	Itpr1	Itpr1	ENSMUSP00000119369	56208	Becn1	Becn1	936
ENSMUSP00000032192	16438	Itpr1	Itpr1	ENSMUSP00000125722	19056	Ppp3cb	Ppp3cb	782
ENSMUSP00000032192	16438	Itpr1	Itpr1	ENSMUSP00000087485	14707	Gng5	Gng5	901
ENSMUSP00000032597	19943	Rpl28	Rpl28	ENSMUSP00000058432	66481	Rps21	Rps21	991
ENSMUSP00000032597	19943	Rpl28	Rpl28	ENSMUSP00000086614	68436	Rpl34	Rpl34	996
ENSMUSP00000032597	19943	Rpl28	Rpl28	ENSMUSP00000047661	12861	Cox6a1	Cox6a1	794
ENSMUSP00000032597	19943	Rpl28	Rpl28	ENSMUSP00000102213	67671	Rpl38	Rpl38	994
ENSMUSP00000032597	19943	Rpl28	Rpl28	ENSMUSP00000099435	65019	Rpl23	Rpl23	991
ENSMUSP00000032597	19943	Rpl28	Rpl28	ENSMUSP00000120096	22186	Uba52	Uba52	966
ENSMUSP00000032597	19943	Rpl28	Rpl28	ENSMUSP00000035105	16785	Rpsa	Rpsa	929
ENSMUSP00000032597	19943	Rpl28	Rpl28	ENSMUSP00000046101	13629	Eef2	Eef2	963
ENSMUSP00000032597	19943	Rpl28	Rpl28	ENSMUSP00000080854	100503670	Rpl5	Rpl5	995
ENSMUSP00000032597	19943	Rpl28	Rpl28	ENSMUSP00000110013	54127	Rps28	Rps28	983
ENSMUSP00000032597	19943	Rpl28	Rpl28	ENSMUSP00000034966	67891	Rpl4	Rpl4	993
ENSMUSP00000032597	19943	Rpl28	Rpl28	ENSMUSP00000078654	319195	Rpl17	Rpl17	967
ENSMUSP00000032597	19943	Rpl28	Rpl28	ENSMUSP00000034738	225215	Rsl24d1	Rsl24d1	838
ENSMUSP00000032597	19943	Rpl28	Rpl28	ENSMUSP00000108837	19982	Rpl36a	Rpl36a	995
ENSMUSP00000032597	19943	Rpl28	Rpl28	ENSMUSP00000035177	94062	Mrpl3	Mrpl3	700
ENSMUSP00000032597	19943	Rpl28	Rpl28	ENSMUSP00000058368	76808	Rpl18a	Rpl18a	987
ENSMUSP00000032597	19943	Rpl28	Rpl28	ENSMUSP00000071652	20090	Rps29	Rps29	932
ENSMUSP00000033828	14456	Gas6	Gas6	ENSMUSP00000064801	338366	Mia3	Mia3	900
ENSMUSP00000033828	14456	Gas6	Gas6	ENSMUSP00000057462	53612	Vti1b	Vti1b	900
ENSMUSP00000033842	17930	Myom2	Myom2	ENSMUSP00000097561	22138	Ttn	Ttn	775
ENSMUSP00000034136	108682	Gpt2	Gpt2	ENSMUSP00000056502	15929	Idh3g	Idh3g	844
ENSMUSP00000034136	108682	Gpt2	Gpt2	ENSMUSP00000127526	67834	Idh3a	Idh3a	830
ENSMUSP00000034136	108682	Gpt2	Gpt2	ENSMUSP00000103007	269951	Idh2	Idh2	854
ENSMUSP00000034738	225215	Rsl24d1	Rsl24d1	ENSMUSP00000058432	66481	Rps21	Rps21	770
ENSMUSP00000034738	225215	Rsl24d1	Rsl24d1	ENSMUSP00000086614	68436	Rpl34	Rpl34	854
ENSMUSP00000034738	225215	Rsl24d1	Rsl24d1	ENSMUSP00000102213	67671	Rpl38	Rpl38	937
ENSMUSP00000034738	225215	Rsl24d1	Rsl24d1	ENSMUSP00000099435	65019	Rpl23	Rpl23	880
ENSMUSP00000034738	225215	Rsl24d1	Rsl24d1	ENSMUSP00000120096	22186	Uba52	Uba52	804
ENSMUSP00000034738	225215	Rsl24d1	Rsl24d1	ENSMUSP00000080854	100503670	Rpl5	Rpl5	950
ENSMUSP00000034738	225215	Rsl24d1	Rsl24d1	ENSMUSP00000058785	18114	Rrp1	Rrp1	891
ENSMUSP00000034738	225215	Rsl24d1	Rsl24d1	ENSMUSP00000043981	68077	Nop53	Nop53	950
ENSMUSP00000034738	225215	Rsl24d1	Rsl24d1	ENSMUSP00000034966	67891	Rpl4	Rpl4	942
ENSMUSP00000034738	225215	Rsl24d1	Rsl24d1	ENSMUSP00000078654	319195	Rpl17	Rpl17	797
ENSMUSP00000034738	225215	Rsl24d1	Rsl24d1	ENSMUSP00000108837	19982	Rpl36a	Rpl36a	859
ENSMUSP00000034738	225215	Rsl24d1	Rsl24d1	ENSMUSP00000058368	76808	Rpl18a	Rpl18a	865
ENSMUSP00000034775	14155	Fem1b	Fem1b	ENSMUSP00000038591	56468	Socs5	Socs5	904
ENSMUSP00000034775	14155	Fem1b	Fem1b	ENSMUSP00000058233	269529	Fbxo10	Fbxo10	902
ENSMUSP00000034834	18746	Pkm	Pkm	ENSMUSP00000069851	320404	Itpkb	Itpkb	710
ENSMUSP00000034834	18746	Pkm	Pkm	ENSMUSP00000060858	20019	Polr1a	Polr1a	732
ENSMUSP00000034834	18746	Pkm	Pkm	ENSMUSP00000102559	11639	Ak4	Ak4	705
ENSMUSP00000034834	18746	Pkm	Pkm	ENSMUSP00000080854	100503670	Rpl5	Rpl5	724
ENSMUSP00000034834	18746	Pkm	Pkm	ENSMUSP00000136544	18655	Pgk1	Pgk1	906
ENSMUSP00000034966	67891	Rpl4	Rpl4	ENSMUSP00000046101	13629	Eef2	Eef2	986
ENSMUSP00000034966	67891	Rpl4	Rpl4	ENSMUSP00000110013	54127	Rps28	Rps28	998
ENSMUSP00000034966	67891	Rpl4	Rpl4	ENSMUSP00000078654	319195	Rpl17	Rpl17	986
ENSMUSP00000034966	67891	Rpl4	Rpl4	ENSMUSP00000035177	94062	Mrpl3	Mrpl3	731
ENSMUSP00000034966	67891	Rpl4	Rpl4	ENSMUSP00000071652	20090	Rps29	Rps29	962
ENSMUSP00000034966	67891	Rpl4	Rpl4	ENSMUSP00000058432	66481	Rps21	Rps21	998
ENSMUSP00000034966	67891	Rpl4	Rpl4	ENSMUSP00000086614	68436	Rpl34	Rpl34	997
ENSMUSP00000034966	67891	Rpl4	Rpl4	ENSMUSP00000102213	67671	Rpl38	Rpl38	997
ENSMUSP00000034966	67891	Rpl4	Rpl4	ENSMUSP00000099435	65019	Rpl23	Rpl23	998
ENSMUSP00000034966	67891	Rpl4	Rpl4	ENSMUSP00000120096	22186	Uba52	Uba52	991
ENSMUSP00000034966	67891	Rpl4	Rpl4	ENSMUSP00000035105	16785	Rpsa	Rpsa	966
ENSMUSP00000034966	67891	Rpl4	Rpl4	ENSMUSP00000080854	100503670	Rpl5	Rpl5	999
ENSMUSP00000034966	67891	Rpl4	Rpl4	ENSMUSP00000043981	68077	Nop53	Nop53	773
ENSMUSP00000034966	67891	Rpl4	Rpl4	ENSMUSP00000108837	19982	Rpl36a	Rpl36a	991
ENSMUSP00000034966	67891	Rpl4	Rpl4	ENSMUSP00000075067	18148	Npm1	Npm1	767
ENSMUSP00000034966	67891	Rpl4	Rpl4	ENSMUSP00000058368	76808	Rpl18a	Rpl18a	997
ENSMUSP00000035105	16785	Rpsa	Rpsa	ENSMUSP00000046101	13629	Eef2	Eef2	969
ENSMUSP00000035105	16785	Rpsa	Rpsa	ENSMUSP00000110013	54127	Rps28	Rps28	997
ENSMUSP00000035105	16785	Rpsa	Rpsa	ENSMUSP00000078654	319195	Rpl17	Rpl17	981
ENSMUSP00000035105	16785	Rpsa	Rpsa	ENSMUSP00000071652	20090	Rps29	Rps29	941
ENSMUSP00000035105	16785	Rpsa	Rpsa	ENSMUSP00000058432	66481	Rps21	Rps21	994
ENSMUSP00000035105	16785	Rpsa	Rpsa	ENSMUSP00000086614	68436	Rpl34	Rpl34	935
ENSMUSP00000035105	16785	Rpsa	Rpsa	ENSMUSP00000102213	67671	Rpl38	Rpl38	970
ENSMUSP00000035105	16785	Rpsa	Rpsa	ENSMUSP00000099435	65019	Rpl23	Rpl23	994
ENSMUSP00000035105	16785	Rpsa	Rpsa	ENSMUSP00000120096	22186	Uba52	Uba52	972
ENSMUSP00000035105	16785	Rpsa	Rpsa	ENSMUSP00000080854	100503670	Rpl5	Rpl5	980
ENSMUSP00000035105	16785	Rpsa	Rpsa	ENSMUSP00000108837	19982	Rpl36a	Rpl36a	988
ENSMUSP00000035105	16785	Rpsa	Rpsa	ENSMUSP00000058368	76808	Rpl18a	Rpl18a	945
ENSMUSP00000035105	16785	Rpsa	Rpsa	ENSMUSP00000106336	100101806	Srp54c	Srp54c	806
ENSMUSP00000035177	94062	Mrpl3	Mrpl3	ENSMUSP00000058432	66481	Rps21	Rps21	820
ENSMUSP00000035177	94062	Mrpl3	Mrpl3	ENSMUSP00000086614	68436	Rpl34	Rpl34	706
ENSMUSP00000035177	94062	Mrpl3	Mrpl3	ENSMUSP00000102213	67671	Rpl38	Rpl38	814
ENSMUSP00000035177	94062	Mrpl3	Mrpl3	ENSMUSP00000099435	65019	Rpl23	Rpl23	870
ENSMUSP00000035177	94062	Mrpl3	Mrpl3	ENSMUSP00000080854	100503670	Rpl5	Rpl5	870
ENSMUSP00000035177	94062	Mrpl3	Mrpl3	ENSMUSP00000039951	66047	Mrpl54	Mrpl54	971
ENSMUSP00000035177	94062	Mrpl3	Mrpl3	ENSMUSP00000075226	67270	Mrpl42	Mrpl42	982
ENSMUSP00000035177	94062	Mrpl3	Mrpl3	ENSMUSP00000058368	76808	Rpl18a	Rpl18a	732
ENSMUSP00000035177	94062	Mrpl3	Mrpl3	ENSMUSP00000071652	20090	Rps29	Rps29	700
ENSMUSP00000035177	94062	Mrpl3	Mrpl3	ENSMUSP00000076503	28030	Gfm1	Gfm1	980
ENSMUSP00000036890	67451	Pkp2	Pkp2	ENSMUSP00000115062	109620	Dsp	Dsp	994
ENSMUSP00000036890	67451	Pkp2	Pkp2	ENSMUSP00000091342	102371	Myzap	Myzap	782
ENSMUSP00000037055	211007	Trim41	Trim41	ENSMUSP00000140967	69010	Anapc13	Anapc13	900
ENSMUSP00000037055	211007	Trim41	Trim41	ENSMUSP00000083393	59008	Anapc5	Anapc5	916
ENSMUSP00000037055	211007	Trim41	Trim41	ENSMUSP00000125745	84585	Rnf123	Rnf123	905
ENSMUSP00000037055	211007	Trim41	Trim41	ENSMUSP00000038813	67615	Ube2r2	Ube2r2	914
ENSMUSP00000037055	211007	Trim41	Trim41	ENSMUSP00000120096	22186	Uba52	Uba52	903
ENSMUSP00000037055	211007	Trim41	Trim41	ENSMUSP00000100058	22214	Ube2h	Ube2h	928
ENSMUSP00000037055	211007	Trim41	Trim41	ENSMUSP00000058233	269529	Fbxo10	Fbxo10	901
ENSMUSP00000037268	232989	Hnrnpul1	Hnrnpul1	ENSMUSP00000039406	233073	U2af1l4	U2af1l4	922
ENSMUSP00000037268	232989	Hnrnpul1	Hnrnpul1	ENSMUSP00000038505	20022	Polr2j	Polr2j	903
ENSMUSP00000037268	232989	Hnrnpul1	Hnrnpul1	ENSMUSP00000107595	545592	Gm11847	Gm11847	940
ENSMUSP00000037341	66916	Ndufb7	Ndufb7	ENSMUSP00000047661	12861	Cox6a1	Cox6a1	968
ENSMUSP00000037341	66916	Ndufb7	Ndufb7	ENSMUSP00000037417	75454	Phpt1	Phpt1	822
ENSMUSP00000037341	66916	Ndufb7	Ndufb7	ENSMUSP00000079944	12859	Cox5b	Cox5b	979
ENSMUSP00000037341	66916	Ndufb7	Ndufb7	ENSMUSP00000101003	75406	Ndufs7	Ndufs7	999
ENSMUSP00000037341	66916	Ndufb7	Ndufb7	ENSMUSP00000075150	110323	Cox6b1	Cox6b1	869
ENSMUSP00000037341	66916	Ndufb7	Ndufb7	ENSMUSP00000125504	57423	Atp5j2	Atp5j2	940
ENSMUSP00000037341	66916	Ndufb7	Ndufb7	ENSMUSP00000080993	17721	ND5	ND5	746
ENSMUSP00000037341	66916	Ndufb7	Ndufb7	ENSMUSP00000112320	104130	Ndufb11	Ndufb11	998
ENSMUSP00000037417	75454	Phpt1	Phpt1	ENSMUSP00000101003	75406	Ndufs7	Ndufs7	833
ENSMUSP00000037417	75454	Phpt1	Phpt1	ENSMUSP00000112320	104130	Ndufb11	Ndufb11	790
ENSMUSP00000038505	20022	Polr2j	Polr2j	ENSMUSP00000099592	21401	Tcea3	Tcea3	755
ENSMUSP00000038505	20022	Polr2j	Polr2j	ENSMUSP00000099986	18972	Pold2	Pold2	908
ENSMUSP00000038505	20022	Polr2j	Polr2j	ENSMUSP00000060858	20019	Polr1a	Polr1a	837
ENSMUSP00000038505	20022	Polr2j	Polr2j	ENSMUSP00000120096	22186	Uba52	Uba52	915
ENSMUSP00000038505	20022	Polr2j	Polr2j	ENSMUSP00000124093	252870	Usp7	Usp7	900
ENSMUSP00000038505	20022	Polr2j	Polr2j	ENSMUSP00000051432	15270	H2ax	H2ax	902
ENSMUSP00000038505	20022	Polr2j	Polr2j	ENSMUSP00000135215	319148	H3c3	H3c3	904
ENSMUSP00000038505	20022	Polr2j	Polr2j	ENSMUSP00000039406	233073	U2af1l4	U2af1l4	909
ENSMUSP00000038505	20022	Polr2j	Polr2j	ENSMUSP00000076971	20833	Ssrp1	Ssrp1	903
ENSMUSP00000038505	20022	Polr2j	Polr2j	ENSMUSP00000107595	545592	Gm11847	Gm11847	904
ENSMUSP00000038591	56468	Socs5	Socs5	ENSMUSP00000099842	16451	Jak1	Jak1	936
ENSMUSP00000038591	56468	Socs5	Socs5	ENSMUSP00000058233	269529	Fbxo10	Fbxo10	903
ENSMUSP00000038813	67615	Ube2r2	Ube2r2	ENSMUSP00000140967	69010	Anapc13	Anapc13	922
ENSMUSP00000038813	67615	Ube2r2	Ube2r2	ENSMUSP00000083393	59008	Anapc5	Anapc5	923
ENSMUSP00000038813	67615	Ube2r2	Ube2r2	ENSMUSP00000125745	84585	Rnf123	Rnf123	905
ENSMUSP00000038813	67615	Ube2r2	Ube2r2	ENSMUSP00000120096	22186	Uba52	Uba52	928
ENSMUSP00000038813	67615	Ube2r2	Ube2r2	ENSMUSP00000100058	22214	Ube2h	Ube2h	930
ENSMUSP00000038813	67615	Ube2r2	Ube2r2	ENSMUSP00000058233	269529	Fbxo10	Fbxo10	900
ENSMUSP00000039406	233073	U2af1l4	U2af1l4	ENSMUSP00000107595	545592	Gm11847	Gm11847	943
ENSMUSP00000039709	18536	Pcm1	Pcm1	ENSMUSP00000081912	101706	Numa1	Numa1	926
ENSMUSP00000039951	66047	Mrpl54	Mrpl54	ENSMUSP00000075226	67270	Mrpl42	Mrpl42	986
ENSMUSP00000039951	66047	Mrpl54	Mrpl54	ENSMUSP00000076503	28030	Gfm1	Gfm1	902
ENSMUSP00000040905	83679	Pde4dip	Pde4dip	ENSMUSP00000112991	238871	Pde4d	Pde4d	838
ENSMUSP00000041447	18604	Pdk2	Pdk2	ENSMUSP00000092821	382051	Pdp2	Pdp2	810
ENSMUSP00000041447	18604	Pdk2	Pdk2	ENSMUSP00000099991	18607	Pdpk1	Pdpk1	769
ENSMUSP00000043981	68077	Nop53	Nop53	ENSMUSP00000060858	20019	Polr1a	Polr1a	763
ENSMUSP00000043981	68077	Nop53	Nop53	ENSMUSP00000080854	100503670	Rpl5	Rpl5	885
ENSMUSP00000043981	68077	Nop53	Nop53	ENSMUSP00000058785	18114	Rrp1	Rrp1	756
ENSMUSP00000044751	69038	Tmem258	Tmem258	ENSMUSP00000113116	16430	Stt3a	Stt3a	863
ENSMUSP00000044936	378431	Txlnb	Txlnb	ENSMUSP00000125995	17189	Mb	Mb	709
ENSMUSP00000045693	12808	Cobl	Cobl	ENSMUSP00000130098	23970	Pacsin2	Pacsin2	820
ENSMUSP00000045693	12808	Cobl	Cobl	ENSMUSP00000107415	70599	Itprid2	Itprid2	708
ENSMUSP00000045816	50708	H1f2	H1f2	ENSMUSP00000135215	319148	H3c3	H3c3	755
ENSMUSP00000046101	13629	Eef2	Eef2	ENSMUSP00000110013	54127	Rps28	Rps28	986
ENSMUSP00000046101	13629	Eef2	Eef2	ENSMUSP00000078654	319195	Rpl17	Rpl17	922
ENSMUSP00000046101	13629	Eef2	Eef2	ENSMUSP00000071652	20090	Rps29	Rps29	838
ENSMUSP00000046101	13629	Eef2	Eef2	ENSMUSP00000058432	66481	Rps21	Rps21	966
ENSMUSP00000046101	13629	Eef2	Eef2	ENSMUSP00000086614	68436	Rpl34	Rpl34	829
ENSMUSP00000046101	13629	Eef2	Eef2	ENSMUSP00000102213	67671	Rpl38	Rpl38	984
ENSMUSP00000046101	13629	Eef2	Eef2	ENSMUSP00000099435	65019	Rpl23	Rpl23	974
ENSMUSP00000046101	13629	Eef2	Eef2	ENSMUSP00000120096	22186	Uba52	Uba52	887
ENSMUSP00000046101	13629	Eef2	Eef2	ENSMUSP00000080854	100503670	Rpl5	Rpl5	985
ENSMUSP00000046101	13629	Eef2	Eef2	ENSMUSP00000108837	19982	Rpl36a	Rpl36a	865
ENSMUSP00000046101	13629	Eef2	Eef2	ENSMUSP00000058368	76808	Rpl18a	Rpl18a	986
ENSMUSP00000046601	18575	Pde1c	Pde1c	ENSMUSP00000110563	224129	Adcy5	Adcy5	791
ENSMUSP00000046639	319518	Pdpr	Pdpr	ENSMUSP00000092821	382051	Pdp2	Pdp2	965
ENSMUSP00000047661	12861	Cox6a1	Cox6a1	ENSMUSP00000079944	12859	Cox5b	Cox5b	992
ENSMUSP00000047661	12861	Cox6a1	Cox6a1	ENSMUSP00000102213	67671	Rpl38	Rpl38	795
ENSMUSP00000047661	12861	Cox6a1	Cox6a1	ENSMUSP00000099435	65019	Rpl23	Rpl23	778
ENSMUSP00000047661	12861	Cox6a1	Cox6a1	ENSMUSP00000140414	67942	Atp5g2	Atp5g2	781
ENSMUSP00000047661	12861	Cox6a1	Cox6a1	ENSMUSP00000110013	54127	Rps28	Rps28	764
ENSMUSP00000047661	12861	Cox6a1	Cox6a1	ENSMUSP00000075150	110323	Cox6b1	Cox6b1	989
ENSMUSP00000047661	12861	Cox6a1	Cox6a1	ENSMUSP00000125504	57423	Atp5j2	Atp5j2	933
ENSMUSP00000047661	12861	Cox6a1	Cox6a1	ENSMUSP00000080993	17721	ND5	ND5	904
ENSMUSP00000047661	12861	Cox6a1	Cox6a1	ENSMUSP00000112320	104130	Ndufb11	Ndufb11	804
ENSMUSP00000047778	110959	Nudt19	Nudt19	ENSMUSP00000120096	22186	Uba52	Uba52	930
ENSMUSP00000047778	110959	Nudt19	Nudt19	ENSMUSP00000063325	11430	Acox1	Acox1	910
ENSMUSP00000048573	55979	Agpat1	Agpat1	ENSMUSP00000127325	102247	Gpat4	Gpat4	919
ENSMUSP00000048803	116847	Prelp	Prelp	ENSMUSP00000066515	56386	B4galt6	B4galt6	900
ENSMUSP00000048803	116847	Prelp	Prelp	ENSMUSP00000115756	54613	St3gal6	St3gal6	901
ENSMUSP00000049007	12385	Ctnna1	Ctnna1	ENSMUSP00000086207	29857	Mapk12	Mapk12	900
ENSMUSP00000049457	12293	Cacna2d1	Cacna2d1	ENSMUSP00000112991	238871	Pde4d	Pde4d	730
ENSMUSP00000051432	15270	H2ax	H2ax	ENSMUSP00000069851	320404	Itpkb	Itpkb	739
ENSMUSP00000051432	15270	H2ax	H2ax	ENSMUSP00000060858	20019	Polr1a	Polr1a	918
ENSMUSP00000051432	15270	H2ax	H2ax	ENSMUSP00000086724	223697	Sun2	Sun2	908
ENSMUSP00000051432	15270	H2ax	H2ax	ENSMUSP00000074139	52683	Ncaph2	Ncaph2	912
ENSMUSP00000051432	15270	H2ax	H2ax	ENSMUSP00000120096	22186	Uba52	Uba52	962
ENSMUSP00000051432	15270	H2ax	H2ax	ENSMUSP00000135215	319148	H3c3	H3c3	977
ENSMUSP00000051432	15270	H2ax	H2ax	ENSMUSP00000136357	319155	H4c3	H4c3	749
ENSMUSP00000051432	15270	H2ax	H2ax	ENSMUSP00000088935	22218	Sumo1	Sumo1	935
ENSMUSP00000051935	66882	Bzw1	Bzw1	ENSMUSP00000124551	13690	Eif4g2	Eif4g2	712
ENSMUSP00000054072	56310	Gps2	Gps2	ENSMUSP00000135215	319148	H3c3	H3c3	902
ENSMUSP00000056502	15929	Idh3g	Idh3g	ENSMUSP00000100038	11428	Aco1	Aco1	949
ENSMUSP00000056502	15929	Idh3g	Idh3g	ENSMUSP00000127526	67834	Idh3a	Idh3a	996
ENSMUSP00000056502	15929	Idh3g	Idh3g	ENSMUSP00000103007	269951	Idh2	Idh2	992
ENSMUSP00000057543	14678	Gnai2	Gnai2	ENSMUSP00000130874	243764	Chrm2	Chrm2	903
ENSMUSP00000057543	14678	Gnai2	Gnai2	ENSMUSP00000072800	20315	Cxcl12	Cxcl12	918
ENSMUSP00000057543	14678	Gnai2	Gnai2	ENSMUSP00000110563	224129	Adcy5	Adcy5	933
ENSMUSP00000057543	14678	Gnai2	Gnai2	ENSMUSP00000087485	14707	Gng5	Gng5	953
ENSMUSP00000058233	269529	Fbxo10	Fbxo10	ENSMUSP00000120096	22186	Uba52	Uba52	900
ENSMUSP00000058233	269529	Fbxo10	Fbxo10	ENSMUSP00000140967	69010	Anapc13	Anapc13	900
ENSMUSP00000058233	269529	Fbxo10	Fbxo10	ENSMUSP00000083393	59008	Anapc5	Anapc5	900
ENSMUSP00000058233	269529	Fbxo10	Fbxo10	ENSMUSP00000125745	84585	Rnf123	Rnf123	901
ENSMUSP00000058233	269529	Fbxo10	Fbxo10	ENSMUSP00000100058	22214	Ube2h	Ube2h	901
ENSMUSP00000058368	76808	Rpl18a	Rpl18a	ENSMUSP00000058432	66481	Rps21	Rps21	997
ENSMUSP00000058368	76808	Rpl18a	Rpl18a	ENSMUSP00000086614	68436	Rpl34	Rpl34	995
ENSMUSP00000058368	76808	Rpl18a	Rpl18a	ENSMUSP00000102213	67671	Rpl38	Rpl38	996
ENSMUSP00000058368	76808	Rpl18a	Rpl18a	ENSMUSP00000099435	65019	Rpl23	Rpl23	997
ENSMUSP00000058368	76808	Rpl18a	Rpl18a	ENSMUSP00000120096	22186	Uba52	Uba52	987
ENSMUSP00000058368	76808	Rpl18a	Rpl18a	ENSMUSP00000080854	100503670	Rpl5	Rpl5	992
ENSMUSP00000058368	76808	Rpl18a	Rpl18a	ENSMUSP00000110013	54127	Rps28	Rps28	997
ENSMUSP00000058368	76808	Rpl18a	Rpl18a	ENSMUSP00000113116	16430	Stt3a	Stt3a	751
ENSMUSP00000058368	76808	Rpl18a	Rpl18a	ENSMUSP00000078654	319195	Rpl17	Rpl17	977
ENSMUSP00000058368	76808	Rpl18a	Rpl18a	ENSMUSP00000108837	19982	Rpl36a	Rpl36a	987
ENSMUSP00000058368	76808	Rpl18a	Rpl18a	ENSMUSP00000071652	20090	Rps29	Rps29	927
ENSMUSP00000058368	76808	Rpl18a	Rpl18a	ENSMUSP00000106336	100101806	Srp54c	Srp54c	773
ENSMUSP00000058432	66481	Rps21	Rps21	ENSMUSP00000086614	68436	Rpl34	Rpl34	999
ENSMUSP00000058432	66481	Rps21	Rps21	ENSMUSP00000102213	67671	Rpl38	Rpl38	999
ENSMUSP00000058432	66481	Rps21	Rps21	ENSMUSP00000099435	65019	Rpl23	Rpl23	999
ENSMUSP00000058432	66481	Rps21	Rps21	ENSMUSP00000120096	22186	Uba52	Uba52	993
ENSMUSP00000058432	66481	Rps21	Rps21	ENSMUSP00000080854	100503670	Rpl5	Rpl5	993
ENSMUSP00000058432	66481	Rps21	Rps21	ENSMUSP00000110013	54127	Rps28	Rps28	999
ENSMUSP00000058432	66481	Rps21	Rps21	ENSMUSP00000078654	319195	Rpl17	Rpl17	951
ENSMUSP00000058432	66481	Rps21	Rps21	ENSMUSP00000108837	19982	Rpl36a	Rpl36a	996
ENSMUSP00000058432	66481	Rps21	Rps21	ENSMUSP00000071652	20090	Rps29	Rps29	957
ENSMUSP00000058432	66481	Rps21	Rps21	ENSMUSP00000106336	100101806	Srp54c	Srp54c	808
ENSMUSP00000059404	19290	Pura	Pura	ENSMUSP00000099986	18972	Pold2	Pold2	725
ENSMUSP00000059643	244923	Klhl31	Klhl31	ENSMUSP00000097561	22138	Ttn	Ttn	730
ENSMUSP00000060149	238564	Mylk4	Mylk4	ENSMUSP00000123412	67268	Myl12a	Myl12a	837
ENSMUSP00000060149	238564	Mylk4	Mylk4	ENSMUSP00000099985	17898	Myl7	Myl7	787
ENSMUSP00000060157	213436	Rtl3	Rtl3	ENSMUSP00000086158	66158	Rtl8a	Rtl8a	706
ENSMUSP00000060858	20019	Polr1a	Polr1a	ENSMUSP00000124551	13690	Eif4g2	Eif4g2	704
ENSMUSP00000060858	20019	Polr1a	Polr1a	ENSMUSP00000135215	319148	H3c3	H3c3	918
ENSMUSP00000063325	11430	Acox1	Acox1	ENSMUSP00000120096	22186	Uba52	Uba52	900
ENSMUSP00000066515	56386	B4galt6	B4galt6	ENSMUSP00000130660	14466	Gba	Gba	964
ENSMUSP00000069851	320404	Itpkb	Itpkb	ENSMUSP00000072800	20315	Cxcl12	Cxcl12	700
ENSMUSP00000069851	320404	Itpkb	Itpkb	ENSMUSP00000099862	21687	Tek	Tek	704
ENSMUSP00000069851	320404	Itpkb	Itpkb	ENSMUSP00000119369	56208	Becn1	Becn1	738
ENSMUSP00000069851	320404	Itpkb	Itpkb	ENSMUSP00000109633	13405	Dmd	Dmd	713
ENSMUSP00000069851	320404	Itpkb	Itpkb	ENSMUSP00000099842	16451	Jak1	Jak1	730
ENSMUSP00000070958	11607	Agtr1a	Agtr1a	ENSMUSP00000130874	243764	Chrm2	Chrm2	909
ENSMUSP00000070958	11607	Agtr1a	Agtr1a	ENSMUSP00000137503	74117	Actr3	Actr3	900
ENSMUSP00000070958	11607	Agtr1a	Agtr1a	ENSMUSP00000108723	66691	Gapvd1	Gapvd1	901
ENSMUSP00000070958	11607	Agtr1a	Agtr1a	ENSMUSP00000120096	22186	Uba52	Uba52	900
ENSMUSP00000070958	11607	Agtr1a	Agtr1a	ENSMUSP00000108075	58194	Sh3kbp1	Sh3kbp1	900
ENSMUSP00000070958	11607	Agtr1a	Agtr1a	ENSMUSP00000130098	23970	Pacsin2	Pacsin2	900
ENSMUSP00000070958	11607	Agtr1a	Agtr1a	ENSMUSP00000099584	56378	Arpc3	Arpc3	903
ENSMUSP00000070958	11607	Agtr1a	Agtr1a	ENSMUSP00000087485	14707	Gng5	Gng5	912
ENSMUSP00000071652	20090	Rps29	Rps29	ENSMUSP00000086614	68436	Rpl34	Rpl34	914
ENSMUSP00000071652	20090	Rps29	Rps29	ENSMUSP00000102213	67671	Rpl38	Rpl38	976
ENSMUSP00000071652	20090	Rps29	Rps29	ENSMUSP00000099435	65019	Rpl23	Rpl23	971
ENSMUSP00000071652	20090	Rps29	Rps29	ENSMUSP00000120096	22186	Uba52	Uba52	870
ENSMUSP00000071652	20090	Rps29	Rps29	ENSMUSP00000080854	100503670	Rpl5	Rpl5	976
ENSMUSP00000071652	20090	Rps29	Rps29	ENSMUSP00000110013	54127	Rps28	Rps28	942
ENSMUSP00000071652	20090	Rps29	Rps29	ENSMUSP00000078654	319195	Rpl17	Rpl17	896
ENSMUSP00000071652	20090	Rps29	Rps29	ENSMUSP00000108837	19982	Rpl36a	Rpl36a	933
ENSMUSP00000071652	20090	Rps29	Rps29	ENSMUSP00000106336	100101806	Srp54c	Srp54c	774
ENSMUSP00000072155	72607	Usp13	Usp13	ENSMUSP00000120096	22186	Uba52	Uba52	967
ENSMUSP00000072155	72607	Usp13	Usp13	ENSMUSP00000124093	252870	Usp7	Usp7	827
ENSMUSP00000072155	72607	Usp13	Usp13	ENSMUSP00000119369	56208	Becn1	Becn1	944
ENSMUSP00000072800	20315	Cxcl12	Cxcl12	ENSMUSP00000130874	243764	Chrm2	Chrm2	900
ENSMUSP00000072800	20315	Cxcl12	Cxcl12	ENSMUSP00000099862	21687	Tek	Tek	704
ENSMUSP00000072800	20315	Cxcl12	Cxcl12	ENSMUSP00000087485	14707	Gng5	Gng5	901
ENSMUSP00000074139	52683	Ncaph2	Ncaph2	ENSMUSP00000135215	319148	H3c3	H3c3	902
ENSMUSP00000075063	545622	Ptpn3	Ptpn3	ENSMUSP00000108075	58194	Sh3kbp1	Sh3kbp1	900
ENSMUSP00000075067	18148	Npm1	Npm1	ENSMUSP00000080854	100503670	Rpl5	Rpl5	897
ENSMUSP00000075150	110323	Cox6b1	Cox6b1	ENSMUSP00000079944	12859	Cox5b	Cox5b	978
ENSMUSP00000075150	110323	Cox6b1	Cox6b1	ENSMUSP00000101003	75406	Ndufs7	Ndufs7	737
ENSMUSP00000075150	110323	Cox6b1	Cox6b1	ENSMUSP00000125504	57423	Atp5j2	Atp5j2	884
ENSMUSP00000075226	67270	Mrpl42	Mrpl42	ENSMUSP00000076503	28030	Gfm1	Gfm1	913
ENSMUSP00000076459	24052	Sgcd	Sgcd	ENSMUSP00000109633	13405	Dmd	Dmd	989
ENSMUSP00000076503	28030	Gfm1	Gfm1	ENSMUSP00000099435	65019	Rpl23	Rpl23	807
ENSMUSP00000076503	28030	Gfm1	Gfm1	ENSMUSP00000080854	100503670	Rpl5	Rpl5	811
ENSMUSP00000076971	20833	Ssrp1	Ssrp1	ENSMUSP00000099986	18972	Pold2	Pold2	737
ENSMUSP00000078654	319195	Rpl17	Rpl17	ENSMUSP00000086614	68436	Rpl34	Rpl34	984
ENSMUSP00000078654	319195	Rpl17	Rpl17	ENSMUSP00000102213	67671	Rpl38	Rpl38	987
ENSMUSP00000078654	319195	Rpl17	Rpl17	ENSMUSP00000099435	65019	Rpl23	Rpl23	998
ENSMUSP00000078654	319195	Rpl17	Rpl17	ENSMUSP00000120096	22186	Uba52	Uba52	988
ENSMUSP00000078654	319195	Rpl17	Rpl17	ENSMUSP00000080854	100503670	Rpl5	Rpl5	994
ENSMUSP00000078654	319195	Rpl17	Rpl17	ENSMUSP00000110013	54127	Rps28	Rps28	985
ENSMUSP00000078654	319195	Rpl17	Rpl17	ENSMUSP00000113116	16430	Stt3a	Stt3a	746
ENSMUSP00000078654	319195	Rpl17	Rpl17	ENSMUSP00000108837	19982	Rpl36a	Rpl36a	995
ENSMUSP00000078654	319195	Rpl17	Rpl17	ENSMUSP00000106336	100101806	Srp54c	Srp54c	770
ENSMUSP00000079944	12859	Cox5b	Cox5b	ENSMUSP00000101003	75406	Ndufs7	Ndufs7	911
ENSMUSP00000079944	12859	Cox5b	Cox5b	ENSMUSP00000125504	57423	Atp5j2	Atp5j2	820
ENSMUSP00000079944	12859	Cox5b	Cox5b	ENSMUSP00000080993	17721	ND5	ND5	989
ENSMUSP00000079944	12859	Cox5b	Cox5b	ENSMUSP00000112320	104130	Ndufb11	Ndufb11	735
ENSMUSP00000080538	140781	Myh7	Myh7	ENSMUSP00000109633	13405	Dmd	Dmd	946
ENSMUSP00000080538	17888	Myh6	Myh6	ENSMUSP00000109633	13405	Dmd	Dmd	946
ENSMUSP00000080538	140781	Myh7	Myh7	ENSMUSP00000107717	21956	Tnnt2	Tnnt2	992
ENSMUSP00000080538	17888	Myh6	Myh6	ENSMUSP00000107717	21956	Tnnt2	Tnnt2	992
ENSMUSP00000080538	140781	Myh7	Myh7	ENSMUSP00000127070	17868	Mybpc3	Mybpc3	993
ENSMUSP00000080538	17888	Myh6	Myh6	ENSMUSP00000127070	17868	Mybpc3	Mybpc3	993
ENSMUSP00000080538	140781	Myh7	Myh7	ENSMUSP00000099867	68966	Ngdn	Ngdn	953
ENSMUSP00000080538	17888	Myh6	Myh6	ENSMUSP00000099867	68966	Ngdn	Ngdn	953
ENSMUSP00000080538	140781	Myh7	Myh7	ENSMUSP00000097561	22138	Ttn	Ttn	985
ENSMUSP00000080538	17888	Myh6	Myh6	ENSMUSP00000097561	22138	Ttn	Ttn	985
ENSMUSP00000080538	140781	Myh7	Myh7	ENSMUSP00000099985	17898	Myl7	Myl7	868
ENSMUSP00000080538	17888	Myh6	Myh6	ENSMUSP00000099985	17898	Myl7	Myl7	868
ENSMUSP00000080854	100503670	Rpl5	Rpl5	ENSMUSP00000086614	68436	Rpl34	Rpl34	993
ENSMUSP00000080854	100503670	Rpl5	Rpl5	ENSMUSP00000102213	67671	Rpl38	Rpl38	999
ENSMUSP00000080854	100503670	Rpl5	Rpl5	ENSMUSP00000099435	65019	Rpl23	Rpl23	999
ENSMUSP00000080854	100503670	Rpl5	Rpl5	ENSMUSP00000120096	22186	Uba52	Uba52	976
ENSMUSP00000080854	100503670	Rpl5	Rpl5	ENSMUSP00000110013	54127	Rps28	Rps28	987
ENSMUSP00000080854	100503670	Rpl5	Rpl5	ENSMUSP00000108837	19982	Rpl36a	Rpl36a	996
ENSMUSP00000080854	100503670	Rpl5	Rpl5	ENSMUSP00000106336	100101806	Srp54c	Srp54c	727
ENSMUSP00000081011	14778	Gpx3	Gpx3	ENSMUSP00000098768	20657	Sod3	Sod3	711
ENSMUSP00000083393	59008	Anapc5	Anapc5	ENSMUSP00000099436	26446	Psmb3	Psmb3	903
ENSMUSP00000083393	59008	Anapc5	Anapc5	ENSMUSP00000120096	22186	Uba52	Uba52	900
ENSMUSP00000083393	59008	Anapc5	Anapc5	ENSMUSP00000140967	69010	Anapc13	Anapc13	996
ENSMUSP00000083393	59008	Anapc5	Anapc5	ENSMUSP00000125745	84585	Rnf123	Rnf123	900
ENSMUSP00000083393	59008	Anapc5	Anapc5	ENSMUSP00000100058	22214	Ube2h	Ube2h	902
ENSMUSP00000085683	30957	Mapk8ip3	Mapk8ip3	ENSMUSP00000090873	69576	Smco1	Smco1	734
ENSMUSP00000086614	68436	Rpl34	Rpl34	ENSMUSP00000102213	67671	Rpl38	Rpl38	999
ENSMUSP00000086614	68436	Rpl34	Rpl34	ENSMUSP00000099435	65019	Rpl23	Rpl23	998
ENSMUSP00000086614	68436	Rpl34	Rpl34	ENSMUSP00000120096	22186	Uba52	Uba52	993
ENSMUSP00000086614	68436	Rpl34	Rpl34	ENSMUSP00000110013	54127	Rps28	Rps28	998
ENSMUSP00000086614	68436	Rpl34	Rpl34	ENSMUSP00000113116	16430	Stt3a	Stt3a	779
ENSMUSP00000086614	68436	Rpl34	Rpl34	ENSMUSP00000108837	19982	Rpl36a	Rpl36a	994
ENSMUSP00000086614	68436	Rpl34	Rpl34	ENSMUSP00000106336	100101806	Srp54c	Srp54c	752
ENSMUSP00000086716	22284	Usp9x	Usp9x	ENSMUSP00000120096	22186	Uba52	Uba52	930
ENSMUSP00000086724	223697	Sun2	Sun2	ENSMUSP00000135215	319148	H3c3	H3c3	900
ENSMUSP00000087485	14707	Gng5	Gng5	ENSMUSP00000130874	243764	Chrm2	Chrm2	904
ENSMUSP00000087485	14707	Gng5	Gng5	ENSMUSP00000099991	18607	Pdpk1	Pdpk1	901
ENSMUSP00000087485	14707	Gng5	Gng5	ENSMUSP00000106789	23797	Akt3	Akt3	901
ENSMUSP00000087485	14707	Gng5	Gng5	ENSMUSP00000110563	224129	Adcy5	Adcy5	924
ENSMUSP00000087694	223455	Marchf6	Marchf6	ENSMUSP00000120096	22186	Uba52	Uba52	900
ENSMUSP00000088935	22218	Sumo1	Sumo1	ENSMUSP00000120096	22186	Uba52	Uba52	912
ENSMUSP00000091342	102371	Myzap	Myzap	ENSMUSP00000115062	109620	Dsp	Dsp	773
ENSMUSP00000092157	69162	Sec31a	Sec31a	ENSMUSP00000099475	67300	Cltc	Cltc	873
ENSMUSP00000092157	69162	Sec31a	Sec31a	ENSMUSP00000118179	12847	Copa	Copa	895
ENSMUSP00000095392	13518	Dst	Dst	ENSMUSP00000101622	12476	Cd151	Cd151	943
ENSMUSP00000095736	16157	Il11ra1	Il11ra1	ENSMUSP00000099842	16451	Jak1	Jak1	909
ENSMUSP00000097089	18193	Nsd1	Nsd1	ENSMUSP00000135215	319148	H3c3	H3c3	936
ENSMUSP00000097561	22138	Ttn	Ttn	ENSMUSP00000125995	17189	Mb	Mb	720
ENSMUSP00000097561	22138	Ttn	Ttn	ENSMUSP00000109633	13405	Dmd	Dmd	973
ENSMUSP00000097561	22138	Ttn	Ttn	ENSMUSP00000107717	21956	Tnnt2	Tnnt2	981
ENSMUSP00000097561	22138	Ttn	Ttn	ENSMUSP00000127070	17868	Mybpc3	Mybpc3	956
ENSMUSP00000097561	22138	Ttn	Ttn	ENSMUSP00000099867	68966	Ngdn	Ngdn	957
ENSMUSP00000097561	22138	Ttn	Ttn	ENSMUSP00000129447	73713	Rbm20	Rbm20	811
ENSMUSP00000097561	22138	Ttn	Ttn	ENSMUSP00000122024	74103	Nebl	Nebl	741
ENSMUSP00000098107	78829	Tsc22d4	Tsc22d4	ENSMUSP00000108620	14605	Tsc22d3	Tsc22d3	712
ENSMUSP00000099435	65019	Rpl23	Rpl23	ENSMUSP00000102213	67671	Rpl38	Rpl38	999
ENSMUSP00000099435	65019	Rpl23	Rpl23	ENSMUSP00000120096	22186	Uba52	Uba52	998
ENSMUSP00000099435	65019	Rpl23	Rpl23	ENSMUSP00000110013	54127	Rps28	Rps28	999
ENSMUSP00000099435	65019	Rpl23	Rpl23	ENSMUSP00000113116	16430	Stt3a	Stt3a	822
ENSMUSP00000099435	65019	Rpl23	Rpl23	ENSMUSP00000108837	19982	Rpl36a	Rpl36a	999
ENSMUSP00000099435	65019	Rpl23	Rpl23	ENSMUSP00000106336	100101806	Srp54c	Srp54c	878
ENSMUSP00000099436	26446	Psmb3	Psmb3	ENSMUSP00000120096	22186	Uba52	Uba52	954
ENSMUSP00000099475	67300	Cltc	Cltc	ENSMUSP00000118179	12847	Copa	Copa	786
ENSMUSP00000099575	54485	Dll4	Dll4	ENSMUSP00000099862	21687	Tek	Tek	715
ENSMUSP00000099584	56378	Arpc3	Arpc3	ENSMUSP00000120096	22186	Uba52	Uba52	901
ENSMUSP00000099584	56378	Arpc3	Arpc3	ENSMUSP00000108075	58194	Sh3kbp1	Sh3kbp1	900
ENSMUSP00000099584	56378	Arpc3	Arpc3	ENSMUSP00000130874	243764	Chrm2	Chrm2	903
ENSMUSP00000099584	56378	Arpc3	Arpc3	ENSMUSP00000137503	74117	Actr3	Actr3	995
ENSMUSP00000099584	56378	Arpc3	Arpc3	ENSMUSP00000130098	23970	Pacsin2	Pacsin2	900
ENSMUSP00000099584	56378	Arpc3	Arpc3	ENSMUSP00000108723	66691	Gapvd1	Gapvd1	900
ENSMUSP00000099842	16451	Jak1	Jak1	ENSMUSP00000126137	16880	Lifr	Lifr	947
ENSMUSP00000099867	68966	Ngdn	Ngdn	ENSMUSP00000107717	21956	Tnnt2	Tnnt2	851
ENSMUSP00000099867	68966	Ngdn	Ngdn	ENSMUSP00000127070	17868	Mybpc3	Mybpc3	973
ENSMUSP00000099867	68966	Ngdn	Ngdn	ENSMUSP00000099985	17898	Myl7	Myl7	778
ENSMUSP00000099985	17898	Myl7	Myl7	ENSMUSP00000107717	21956	Tnnt2	Tnnt2	954
ENSMUSP00000099986	18972	Pold2	Pold2	ENSMUSP00000120096	22186	Uba52	Uba52	902
ENSMUSP00000099986	18972	Pold2	Pold2	ENSMUSP00000124093	252870	Usp7	Usp7	902
ENSMUSP00000099991	18607	Pdpk1	Pdpk1	ENSMUSP00000106789	23797	Akt3	Akt3	978
ENSMUSP00000100038	11428	Aco1	Aco1	ENSMUSP00000127526	67834	Idh3a	Idh3a	961
ENSMUSP00000100038	11428	Aco1	Aco1	ENSMUSP00000103007	269951	Idh2	Idh2	965
ENSMUSP00000100058	22214	Ube2h	Ube2h	ENSMUSP00000120096	22186	Uba52	Uba52	913
ENSMUSP00000100058	22214	Ube2h	Ube2h	ENSMUSP00000140967	69010	Anapc13	Anapc13	900
ENSMUSP00000100058	22214	Ube2h	Ube2h	ENSMUSP00000125745	84585	Rnf123	Rnf123	904
ENSMUSP00000101003	75406	Ndufs7	Ndufs7	ENSMUSP00000125504	57423	Atp5j2	Atp5j2	794
ENSMUSP00000101003	75406	Ndufs7	Ndufs7	ENSMUSP00000112320	104130	Ndufb11	Ndufb11	996
ENSMUSP00000102213	67671	Rpl38	Rpl38	ENSMUSP00000120096	22186	Uba52	Uba52	995
ENSMUSP00000102213	67671	Rpl38	Rpl38	ENSMUSP00000110013	54127	Rps28	Rps28	999
ENSMUSP00000102213	67671	Rpl38	Rpl38	ENSMUSP00000113116	16430	Stt3a	Stt3a	803
ENSMUSP00000102213	67671	Rpl38	Rpl38	ENSMUSP00000108837	19982	Rpl36a	Rpl36a	997
ENSMUSP00000102213	67671	Rpl38	Rpl38	ENSMUSP00000106336	100101806	Srp54c	Srp54c	803
ENSMUSP00000102559	11639	Ak4	Ak4	ENSMUSP00000112991	238871	Pde4d	Pde4d	769
ENSMUSP00000103007	269951	Idh2	Idh2	ENSMUSP00000127526	67834	Idh3a	Idh3a	991
ENSMUSP00000106336	100101806	Srp54c	Srp54c	ENSMUSP00000110013	54127	Rps28	Rps28	751
ENSMUSP00000106336	100101806	Srp54c	Srp54c	ENSMUSP00000108837	19982	Rpl36a	Rpl36a	744
ENSMUSP00000107370	27360	Add3	Add3	ENSMUSP00000109979	11518	Add1	Add1	935
ENSMUSP00000107717	21956	Tnnt2	Tnnt2	ENSMUSP00000109633	13405	Dmd	Dmd	943
ENSMUSP00000107717	21956	Tnnt2	Tnnt2	ENSMUSP00000127070	17868	Mybpc3	Mybpc3	993
ENSMUSP00000108075	58194	Sh3kbp1	Sh3kbp1	ENSMUSP00000120096	22186	Uba52	Uba52	972
ENSMUSP00000108075	58194	Sh3kbp1	Sh3kbp1	ENSMUSP00000130874	243764	Chrm2	Chrm2	900
ENSMUSP00000108075	58194	Sh3kbp1	Sh3kbp1	ENSMUSP00000127329	22359	Vldlr	Vldlr	909
ENSMUSP00000108075	58194	Sh3kbp1	Sh3kbp1	ENSMUSP00000137503	74117	Actr3	Actr3	920
ENSMUSP00000108075	58194	Sh3kbp1	Sh3kbp1	ENSMUSP00000124052	19699	Reln	Reln	906
ENSMUSP00000108075	58194	Sh3kbp1	Sh3kbp1	ENSMUSP00000130098	23970	Pacsin2	Pacsin2	905
ENSMUSP00000108075	58194	Sh3kbp1	Sh3kbp1	ENSMUSP00000108723	66691	Gapvd1	Gapvd1	914
ENSMUSP00000108553	12830	Col4a5	Col4a5	ENSMUSP00000110899	12823	Col19a1	Col19a1	911
ENSMUSP00000108620	14605	Tsc22d3	Tsc22d3	ENSMUSP00000120096	22186	Uba52	Uba52	900
ENSMUSP00000108723	66691	Gapvd1	Gapvd1	ENSMUSP00000130874	243764	Chrm2	Chrm2	900
ENSMUSP00000108723	66691	Gapvd1	Gapvd1	ENSMUSP00000137503	74117	Actr3	Actr3	908
ENSMUSP00000108723	66691	Gapvd1	Gapvd1	ENSMUSP00000120096	22186	Uba52	Uba52	943
ENSMUSP00000108723	66691	Gapvd1	Gapvd1	ENSMUSP00000130098	23970	Pacsin2	Pacsin2	932
ENSMUSP00000108837	19982	Rpl36a	Rpl36a	ENSMUSP00000113761	56330	Pdcd5	Pdcd5	701
ENSMUSP00000108837	19982	Rpl36a	Rpl36a	ENSMUSP00000120096	22186	Uba52	Uba52	995
ENSMUSP00000108837	19982	Rpl36a	Rpl36a	ENSMUSP00000110013	54127	Rps28	Rps28	995
ENSMUSP00000108837	19982	Rpl36a	Rpl36a	ENSMUSP00000113116	16430	Stt3a	Stt3a	786
ENSMUSP00000109633	13405	Dmd	Dmd	ENSMUSP00000127070	17868	Mybpc3	Mybpc3	932
ENSMUSP00000110013	54127	Rps28	Rps28	ENSMUSP00000120096	22186	Uba52	Uba52	997
ENSMUSP00000110563	224129	Adcy5	Adcy5	ENSMUSP00000112991	238871	Pde4d	Pde4d	843
ENSMUSP00000112320	104130	Ndufb11	Ndufb11	ENSMUSP00000125504	57423	Atp5j2	Atp5j2	772
ENSMUSP00000113116	16430	Stt3a	Stt3a	ENSMUSP00000120096	22186	Uba52	Uba52	726
ENSMUSP00000113761	56330	Pdcd5	Pdcd5	ENSMUSP00000129178	56612	Pfdn5	Pfdn5	840
ENSMUSP00000119369	56208	Becn1	Becn1	ENSMUSP00000139608	245860	Atg9a	Atg9a	997
ENSMUSP00000120096	22186	Uba52	Uba52	ENSMUSP00000124093	252870	Usp7	Usp7	974
ENSMUSP00000120096	22186	Uba52	Uba52	ENSMUSP00000135215	319148	H3c3	H3c3	882
ENSMUSP00000120096	22186	Uba52	Uba52	ENSMUSP00000130874	243764	Chrm2	Chrm2	900
ENSMUSP00000120096	22186	Uba52	Uba52	ENSMUSP00000140967	69010	Anapc13	Anapc13	902
ENSMUSP00000120096	22186	Uba52	Uba52	ENSMUSP00000136357	319155	H4c3	H4c3	870
ENSMUSP00000120096	22186	Uba52	Uba52	ENSMUSP00000137503	74117	Actr3	Actr3	900
ENSMUSP00000120096	22186	Uba52	Uba52	ENSMUSP00000125745	84585	Rnf123	Rnf123	900
ENSMUSP00000120096	22186	Uba52	Uba52	ENSMUSP00000130098	23970	Pacsin2	Pacsin2	900
ENSMUSP00000120096	22186	Uba52	Uba52	ENSMUSP00000140394	319152	H3c10	H3c10	921
ENSMUSP00000124052	19699	Reln	Reln	ENSMUSP00000127329	22359	Vldlr	Vldlr	994
ENSMUSP00000125504	57423	Atp5j2	Atp5j2	ENSMUSP00000140414	67942	Atp5g2	Atp5g2	828
ENSMUSP00000125745	84585	Rnf123	Rnf123	ENSMUSP00000140967	69010	Anapc13	Anapc13	900
ENSMUSP00000130098	23970	Pacsin2	Pacsin2	ENSMUSP00000130874	243764	Chrm2	Chrm2	902
ENSMUSP00000130098	23970	Pacsin2	Pacsin2	ENSMUSP00000137503	74117	Actr3	Actr3	904
ENSMUSP00000130874	243764	Chrm2	Chrm2	ENSMUSP00000137503	74117	Actr3	Actr3	900
ENSMUSP00000135215	319148	H3c3	H3c3	ENSMUSP00000136357	319155	H4c3	H4c3	990
ENSMUSP00000135215	319148	H3c3	H3c3	ENSMUSP00000140394	319152	H3c10	H3c10	961
ENSMUSP00000136357	319155	H4c3	H4c3	ENSMUSP00000140394	319152	H3c10	H3c10	984

## Sheet: HyperTH vs HypoTH
Protein_id1	Gene_id1	Official_Symbol	Description	Protein_id2	Gene_id2	Official_Symbol	Description	PPI_score
ENSMUSP00000000090	12858	Cox5a	Cox5a	ENSMUSP00000015934	20930	Surf1	Surf1	749
ENSMUSP00000000090	12858	Cox5a	Cox5a	ENSMUSP00000091835	71970	Zbed5	Zbed5	777
ENSMUSP00000000090	12858	Cox5a	Cox5a	ENSMUSP00000022286	17993	Ndufs4	Ndufs4	963
ENSMUSP00000000090	12858	Cox5a	Cox5a	ENSMUSP00000101003	75406	Ndufs7	Ndufs7	898
ENSMUSP00000000090	12858	Cox5a	Cox5a	ENSMUSP00000019323	17448	Mdh2	Mdh2	881
ENSMUSP00000000090	12858	Cox5a	Cox5a	ENSMUSP00000023210	66445	Cyc1	Cyc1	999
ENSMUSP00000000090	12858	Cox5a	Cox5a	ENSMUSP00000096193	12865	Cox7a1	Cox7a1	931
ENSMUSP00000000090	12858	Cox5a	Cox5a	ENSMUSP00000033176	67003	Uqcrc2	Uqcrc2	998
ENSMUSP00000000090	12858	Cox5a	Cox5a	ENSMUSP00000027478	67273	Ndufa10	Ndufa10	944
ENSMUSP00000000090	12858	Cox5a	Cox5a	ENSMUSP00000023514	68194	Ndufb4	Ndufb4	790
ENSMUSP00000000090	12858	Cox5a	Cox5a	ENSMUSP00000080993	17721	ND5	ND5	991
ENSMUSP00000000090	12858	Cox5a	Cox5a	ENSMUSP00000037341	66916	Ndufb7	Ndufb7	967
ENSMUSP00000000090	12858	Cox5a	Cox5a	ENSMUSP00000065113	56451	Suclg1	Suclg1	746
ENSMUSP00000000260	66355	Gmpr	Gmpr	ENSMUSP00000023043	11564	Adsl	Adsl	796
ENSMUSP00000000260	66355	Gmpr	Gmpr	ENSMUSP00000034992	23959	Nt5e	Nt5e	711
ENSMUSP00000001569	14251	Flot1	Flot1	ENSMUSP00000097066	20411	Sorbs1	Sorbs1	839
ENSMUSP00000001569	14251	Flot1	Flot1	ENSMUSP00000100862	12512	Cd63	Cd63	701
ENSMUSP00000001569	14251	Flot1	Flot1	ENSMUSP00000049007	12385	Ctnna1	Ctnna1	900
ENSMUSP00000001780	11651	Akt1	Akt1	ENSMUSP00000069851	320404	Itpkb	Itpkb	920
ENSMUSP00000001780	11651	Akt1	Akt1	ENSMUSP00000005256	17988	Ndrg1	Ndrg1	713
ENSMUSP00000001780	11651	Akt1	Akt1	ENSMUSP00000023507	56637	Gsk3b	Gsk3b	991
ENSMUSP00000001780	11651	Akt1	Akt1	ENSMUSP00000072800	20315	Cxcl12	Cxcl12	835
ENSMUSP00000001780	11651	Akt1	Akt1	ENSMUSP00000034469	112405	Egln1	Egln1	913
ENSMUSP00000001780	11651	Akt1	Akt1	ENSMUSP00000007814	16549	Khsrp	Khsrp	973
ENSMUSP00000001780	11651	Akt1	Akt1	ENSMUSP00000029445	16653	Kras	Kras	771
ENSMUSP00000001780	11651	Akt1	Akt1	ENSMUSP00000054634	12540	Cdc42	Cdc42	928
ENSMUSP00000001780	11651	Akt1	Akt1	ENSMUSP00000102981	20851	Stat5b	Stat5b	746
ENSMUSP00000001780	11651	Akt1	Akt1	ENSMUSP00000070726	226849	Ppp2r5a	Ppp2r5a	945
ENSMUSP00000001780	11651	Akt1	Akt1	ENSMUSP00000027164	105243938	Gm38137	Gm38137	957
ENSMUSP00000001780	11651	Akt1	Akt1	ENSMUSP00000110563	224129	Adcy5	Adcy5	704
ENSMUSP00000001780	11651	Akt1	Akt1	ENSMUSP00000029266	11747	Anxa5	Anxa5	896
ENSMUSP00000001780	11651	Akt1	Akt1	ENSMUSP00000125509	210789	Tbc1d4	Tbc1d4	990
ENSMUSP00000001780	11651	Akt1	Akt1	ENSMUSP00000027505	66262	Ing5	Ing5	912
ENSMUSP00000001780	11651	Akt1	Akt1	ENSMUSP00000110746	11798	Xiap	Xiap	808
ENSMUSP00000001780	11651	Akt1	Akt1	ENSMUSP00000127715	21961	Tns1	Tns1	723
ENSMUSP00000001780	11651	Akt1	Akt1	ENSMUSP00000066488	11606	Agt	Agt	849
ENSMUSP00000001780	11651	Akt1	Akt1	ENSMUSP00000006669	228026	Pdk1	Pdk1	795
ENSMUSP00000001780	11651	Akt1	Akt1	ENSMUSP00000105536	18016	Nf2	Nf2	813
ENSMUSP00000001780	11651	Akt1	Akt1	ENSMUSP00000068974	20185	Ncor1	Ncor1	739
ENSMUSP00000001812	319757	Smo	Smo	ENSMUSP00000034949	214897	Csnk1g1	Csnk1g1	857
ENSMUSP00000001812	319757	Smo	Smo	ENSMUSP00000026274	93730	Lztfl1	Lztfl1	929
ENSMUSP00000001975	66830	Nacc1	Nacc1	ENSMUSP00000037783	102060	Gadd45gip1	Gadd45gip1	805
ENSMUSP00000002048	70207	Taco1	Taco1	ENSMUSP00000015934	20930	Surf1	Surf1	763
ENSMUSP00000002048	70207	Taco1	Taco1	ENSMUSP00000080993	17721	ND5	ND5	804
ENSMUSP00000002048	70207	Taco1	Taco1	ENSMUSP00000099421	268481	Krt222	Krt222	766
ENSMUSP00000002048	70207	Taco1	Taco1	ENSMUSP00000076503	28030	Gfm1	Gfm1	738
ENSMUSP00000002084	11666	Abcd1	Abcd1	ENSMUSP00000029770	19299	Abcd3	Abcd3	974
ENSMUSP00000002292	68477	Rmnd5a	Rmnd5a	ENSMUSP00000130636	56705	Ranbp9	Ranbp9	902
ENSMUSP00000002292	68477	Rmnd5a	Rmnd5a	ENSMUSP00000100058	22214	Ube2h	Ube2h	737
ENSMUSP00000002846	14711	Gnmt	Gnmt	ENSMUSP00000108143	11655	Alas1	Alas1	902
ENSMUSP00000002846	14711	Gnmt	Gnmt	ENSMUSP00000097442	238505	Mtr	Mtr	729
ENSMUSP00000003027	26400	Map2k7	Map2k7	ENSMUSP00000023507	56637	Gsk3b	Gsk3b	830
ENSMUSP00000003027	26400	Map2k7	Map2k7	ENSMUSP00000029445	16653	Kras	Kras	714
ENSMUSP00000003450	74351	Ddx23	Ddx23	ENSMUSP00000020397	67332	Snrpd3	Snrpd3	993
ENSMUSP00000003450	74351	Ddx23	Ddx23	ENSMUSP00000112213	60321	Wbp11	Wbp11	910
ENSMUSP00000003450	74351	Ddx23	Ddx23	ENSMUSP00000085993	75956	Srrm2	Srrm2	929
ENSMUSP00000003450	74351	Ddx23	Ddx23	ENSMUSP00000125590	231889	Bud31	Bud31	957
ENSMUSP00000003450	74351	Ddx23	Ddx23	ENSMUSP00000037268	232989	Hnrnpul1	Hnrnpul1	904
ENSMUSP00000003450	74351	Ddx23	Ddx23	ENSMUSP00000085734	20817	Srpk2	Srpk2	717
ENSMUSP00000003450	74351	Ddx23	Ddx23	ENSMUSP00000110103	53379	Hnrnpa2b1	Hnrnpa2b1	924
ENSMUSP00000003450	74351	Ddx23	Ddx23	ENSMUSP00000029158	68295	Aar2	Aar2	823
ENSMUSP00000003450	74351	Ddx23	Ddx23	ENSMUSP00000078469	27967	Cherp	Cherp	908
ENSMUSP00000003450	74351	Ddx23	Ddx23	ENSMUSP00000023882	68188	Sympk	Sympk	915
ENSMUSP00000003450	74351	Ddx23	Ddx23	ENSMUSP00000031349	76167	Snrnp35	Snrnp35	929
ENSMUSP00000003450	74351	Ddx23	Ddx23	ENSMUSP00000043123	83701	Srrt	Srrt	906
ENSMUSP00000003450	74351	Ddx23	Ddx23	ENSMUSP00000107595	545592	Gm11847	Gm11847	919
ENSMUSP00000003450	74351	Ddx23	Ddx23	ENSMUSP00000136858	28000	Prpf19	Prpf19	944
ENSMUSP00000003461	18293	Ogdh	Ogdh	ENSMUSP00000022480	115488338	Gm52134	Gm52134	802
ENSMUSP00000003461	18293	Ogdh	Ogdh	ENSMUSP00000022480	239017	Ogdhl	Ogdhl	802
ENSMUSP00000003461	18293	Ogdh	Ogdh	ENSMUSP00000026196	14718	Got1	Got1	889
ENSMUSP00000003461	18293	Ogdh	Ogdh	ENSMUSP00000060346	78920	Dlst	Dlst	998
ENSMUSP00000003461	18293	Ogdh	Ogdh	ENSMUSP00000028892	170718	Idh3b	Idh3b	973
ENSMUSP00000003461	18293	Ogdh	Ogdh	ENSMUSP00000023043	11564	Adsl	Adsl	826
ENSMUSP00000003461	18293	Ogdh	Ogdh	ENSMUSP00000019323	17448	Mdh2	Mdh2	743
ENSMUSP00000003461	18293	Ogdh	Ogdh	ENSMUSP00000127526	67834	Idh3a	Idh3a	983
ENSMUSP00000003461	18293	Ogdh	Ogdh	ENSMUSP00000123765	20916	Sucla2	Sucla2	848
ENSMUSP00000003461	18293	Ogdh	Ogdh	ENSMUSP00000011058	27402	Pdhx	Pdhx	986
ENSMUSP00000003461	18293	Ogdh	Ogdh	ENSMUSP00000023116	11429	Aco2	Aco2	879
ENSMUSP00000003461	18293	Ogdh	Ogdh	ENSMUSP00000023116	78929	Polr3h	Polr3h	879
ENSMUSP00000003461	18293	Ogdh	Ogdh	ENSMUSP00000022268	68263	Pdhb	Pdhb	985
ENSMUSP00000003461	18293	Ogdh	Ogdh	ENSMUSP00000034567	235339	Dlat	Dlat	992
ENSMUSP00000003461	18293	Ogdh	Ogdh	ENSMUSP00000003907	270076	Gcdh	Gcdh	913
ENSMUSP00000003461	18293	Ogdh	Ogdh	ENSMUSP00000071292	12039	Bckdha	Bckdha	933
ENSMUSP00000003461	18293	Ogdh	Ogdh	ENSMUSP00000103007	269951	Idh2	Idh2	974
ENSMUSP00000003461	18293	Ogdh	Ogdh	ENSMUSP00000005826	210582	Coq10a	Coq10a	808
ENSMUSP00000003461	18293	Ogdh	Ogdh	ENSMUSP00000065113	56451	Suclg1	Suclg1	987
ENSMUSP00000003461	18293	Ogdh	Ogdh	ENSMUSP00000095316	15926	Idh1	Idh1	972
ENSMUSP00000003461	18293	Ogdh	Ogdh	ENSMUSP00000034136	108682	Gpt2	Gpt2	868
ENSMUSP00000003568	12922	Crhr2	Crhr2	ENSMUSP00000093939	11512	Adcy6	Adcy6	911
ENSMUSP00000003568	12922	Crhr2	Crhr2	ENSMUSP00000110563	224129	Adcy5	Adcy5	919
ENSMUSP00000003572	353172	Gars	Gars	ENSMUSP00000029752	71807	Tars2	Tars2	820
ENSMUSP00000003572	353172	Gars	Gars	ENSMUSP00000046453	71941	Cars2	Cars2	726
ENSMUSP00000003907	270076	Gcdh	Gcdh	ENSMUSP00000022480	115488338	Gm52134	Gm52134	906
ENSMUSP00000003907	270076	Gcdh	Gcdh	ENSMUSP00000022480	239017	Ogdhl	Ogdhl	906
ENSMUSP00000003907	270076	Gcdh	Gcdh	ENSMUSP00000060346	78920	Dlst	Dlst	923
ENSMUSP00000003907	270076	Gcdh	Gcdh	ENSMUSP00000004729	110826	Etfb	Etfb	733
ENSMUSP00000003907	270076	Gcdh	Gcdh	ENSMUSP00000063325	11430	Acox1	Acox1	945
ENSMUSP00000004172	66626	Cdip1	Cdip1	ENSMUSP00000048092	12267	C3ar1	C3ar1	901
ENSMUSP00000004172	66626	Cdip1	Cdip1	ENSMUSP00000022197	107767	Scamp1	Scamp1	900
ENSMUSP00000004172	66626	Cdip1	Cdip1	ENSMUSP00000048041	12509	Cd59a	Cd59a	900
ENSMUSP00000004172	66626	Cdip1	Cdip1	ENSMUSP00000117231	70791	Hars2	Hars2	860
ENSMUSP00000004172	66626	Cdip1	Cdip1	ENSMUSP00000088174	109905	Rap1a	Rap1a	900
ENSMUSP00000004172	66626	Cdip1	Cdip1	ENSMUSP00000034878	69981	Tmem30a	Tmem30a	900
ENSMUSP00000004172	66626	Cdip1	Cdip1	ENSMUSP00000016309	69660	Tmbim1	Tmbim1	902
ENSMUSP00000004375	12034	Phb2	Phb2	ENSMUSP00000023210	66445	Cyc1	Cyc1	737
ENSMUSP00000004729	110826	Etfb	Etfb	ENSMUSP00000065113	56451	Suclg1	Suclg1	726
ENSMUSP00000005705	21849	Trim28	Trim28	ENSMUSP00000022842	12465	Cct5	Cct5	705
ENSMUSP00000005705	21849	Trim28	Trim28	ENSMUSP00000041242	170753	Zfp704	Zfp704	900
ENSMUSP00000005705	21849	Trim28	Trim28	ENSMUSP00000113157	12419	Cbx5	Cbx5	751
ENSMUSP00000005705	21849	Trim28	Trim28	ENSMUSP00000031862	629578	Cbx3-ps6	Cbx3-ps6	729
ENSMUSP00000005705	21849	Trim28	Trim28	ENSMUSP00000055738	235682	Zfp445	Zfp445	903
ENSMUSP00000005826	210582	Coq10a	Coq10a	ENSMUSP00000022480	115488338	Gm52134	Gm52134	708
ENSMUSP00000005826	210582	Coq10a	Coq10a	ENSMUSP00000022480	239017	Ogdhl	Ogdhl	708
ENSMUSP00000005826	210582	Coq10a	Coq10a	ENSMUSP00000026196	14718	Got1	Got1	866
ENSMUSP00000005826	210582	Coq10a	Coq10a	ENSMUSP00000060346	78920	Dlst	Dlst	863
ENSMUSP00000005826	210582	Coq10a	Coq10a	ENSMUSP00000100038	11428	Aco1	Aco1	980
ENSMUSP00000005826	210582	Coq10a	Coq10a	ENSMUSP00000023043	11564	Adsl	Adsl	901
ENSMUSP00000005826	210582	Coq10a	Coq10a	ENSMUSP00000019323	17448	Mdh2	Mdh2	995
ENSMUSP00000005826	210582	Coq10a	Coq10a	ENSMUSP00000127526	67834	Idh3a	Idh3a	914
ENSMUSP00000005826	210582	Coq10a	Coq10a	ENSMUSP00000123765	20916	Sucla2	Sucla2	777
ENSMUSP00000005826	210582	Coq10a	Coq10a	ENSMUSP00000033176	67003	Uqcrc2	Uqcrc2	710
ENSMUSP00000005826	210582	Coq10a	Coq10a	ENSMUSP00000034567	235339	Dlat	Dlat	990
ENSMUSP00000005826	210582	Coq10a	Coq10a	ENSMUSP00000080993	17721	ND5	ND5	768
ENSMUSP00000005826	210582	Coq10a	Coq10a	ENSMUSP00000032856	109264	Me3	Me3	877
ENSMUSP00000005826	210582	Coq10a	Coq10a	ENSMUSP00000023210	66445	Cyc1	Cyc1	721
ENSMUSP00000005826	210582	Coq10a	Coq10a	ENSMUSP00000099642	100705	Acacb	Acacb	884
ENSMUSP00000005826	210582	Coq10a	Coq10a	ENSMUSP00000011058	27402	Pdhx	Pdhx	748
ENSMUSP00000005826	210582	Coq10a	Coq10a	ENSMUSP00000023116	11429	Aco2	Aco2	989
ENSMUSP00000005826	210582	Coq10a	Coq10a	ENSMUSP00000023116	78929	Polr3h	Polr3h	989
ENSMUSP00000005826	210582	Coq10a	Coq10a	ENSMUSP00000065113	56451	Suclg1	Suclg1	811
ENSMUSP00000006112	13845	Ephb3	Ephb3	ENSMUSP00000050716	13641	Efnb1	Efnb1	997
ENSMUSP00000006235	13030	Ctsb	Ctsb	ENSMUSP00000130660	14466	Gba	Gba	740
ENSMUSP00000006235	13030	Ctsb	Ctsb	ENSMUSP00000028938	13010	Cst3	Cst3	786
ENSMUSP00000006235	13030	Ctsb	Ctsb	ENSMUSP00000015667	13040	Ctss	Ctss	882
ENSMUSP00000006496	76846	Rps9	Rps9	ENSMUSP00000125806	110954	Rpl10	Rpl10	993
ENSMUSP00000006496	76846	Rps9	Rps9	ENSMUSP00000032124	56284	Mrpl19	Mrpl19	837
ENSMUSP00000006496	76846	Rps9	Rps9	ENSMUSP00000033683	20102	Rps4x	Rps4x	997
ENSMUSP00000006496	76846	Rps9	Rps9	ENSMUSP00000080854	100503670	Rpl5	Rpl5	995
ENSMUSP00000006496	76846	Rps9	Rps9	ENSMUSP00000042457	13627	Eef1a1	Eef1a1	958
ENSMUSP00000006496	76846	Rps9	Rps9	ENSMUSP00000028668	78655	Eif3j1	Eif3j1	902
ENSMUSP00000006496	76846	Rps9	Rps9	ENSMUSP00000120528	67427	Rps20	Rps20	999
ENSMUSP00000006496	76846	Rps9	Rps9	ENSMUSP00000127034	13681	Eif4a1	Eif4a1	937
ENSMUSP00000006496	76846	Rps9	Rps9	ENSMUSP00000024763	68565	Mrps18a	Mrps18a	795
ENSMUSP00000006496	76846	Rps9	Rps9	ENSMUSP00000055619	66242	Mrps16	Mrps16	878
ENSMUSP00000006496	76846	Rps9	Rps9	ENSMUSP00000127774	75705	Eif4b	Eif4b	968
ENSMUSP00000006496	76846	Rps9	Rps9	ENSMUSP00000059395	26905	Eif2s3x	Eif2s3x	997
ENSMUSP00000006496	76846	Rps9	Rps9	ENSMUSP00000034966	67891	Rpl4	Rpl4	999
ENSMUSP00000006496	76846	Rps9	Rps9	ENSMUSP00000106519	22070	Tpt1	Tpt1	854
ENSMUSP00000006496	76846	Rps9	Rps9	ENSMUSP00000078654	319195	Rpl17	Rpl17	991
ENSMUSP00000006496	76846	Rps9	Rps9	ENSMUSP00000035177	94062	Mrpl3	Mrpl3	769
ENSMUSP00000006496	76846	Rps9	Rps9	ENSMUSP00000106336	100101806	Srp54c	Srp54c	861
ENSMUSP00000006496	76846	Rps9	Rps9	ENSMUSP00000076503	28030	Gfm1	Gfm1	726
ENSMUSP00000006669	228026	Pdk1	Pdk1	ENSMUSP00000034567	235339	Dlat	Dlat	957
ENSMUSP00000006669	228026	Pdk1	Pdk1	ENSMUSP00000011058	27402	Pdhx	Pdhx	975
ENSMUSP00000006669	228026	Pdk1	Pdk1	ENSMUSP00000022268	68263	Pdhb	Pdhb	974
ENSMUSP00000007814	16549	Khsrp	Khsrp	ENSMUSP00000101833	21843	Tial1	Tial1	807
ENSMUSP00000009689	16535	Kcnq1	Kcnq1	ENSMUSP00000108413	12288	Cacna1c	Cacna1c	700
ENSMUSP00000009689	16535	Kcnq1	Kcnq1	ENSMUSP00000052248	16509	Kcne1	Kcne1	996
ENSMUSP00000009689	16535	Kcnq1	Kcnq1	ENSMUSP00000024599	16004	Igf2r	Igf2r	746
ENSMUSP00000011058	27402	Pdhx	Pdhx	ENSMUSP00000022480	115488338	Gm52134	Gm52134	749
ENSMUSP00000011058	27402	Pdhx	Pdhx	ENSMUSP00000022480	239017	Ogdhl	Ogdhl	749
ENSMUSP00000011058	27402	Pdhx	Pdhx	ENSMUSP00000060346	78920	Dlst	Dlst	981
ENSMUSP00000011058	27402	Pdhx	Pdhx	ENSMUSP00000034567	235339	Dlat	Dlat	974
ENSMUSP00000011058	27402	Pdhx	Pdhx	ENSMUSP00000092821	382051	Pdp2	Pdp2	933
ENSMUSP00000011058	27402	Pdhx	Pdhx	ENSMUSP00000022268	68263	Pdhb	Pdhb	999
ENSMUSP00000011058	27402	Pdhx	Pdhx	ENSMUSP00000071292	12039	Bckdha	Bckdha	977
ENSMUSP00000011058	27402	Pdhx	Pdhx	ENSMUSP00000046639	319518	Pdpr	Pdpr	944
ENSMUSP00000013931	110147	Ehmt2	Ehmt2	ENSMUSP00000115578	22190	Ubc	Ubc	905
ENSMUSP00000013931	110147	Ehmt2	Ehmt2	ENSMUSP00000113928	56317	Anapc7	Anapc7	907
ENSMUSP00000013931	110147	Ehmt2	Ehmt2	ENSMUSP00000060054	107932	Chd4	Chd4	941
ENSMUSP00000013931	110147	Ehmt2	Ehmt2	ENSMUSP00000083393	59008	Anapc5	Anapc5	920
ENSMUSP00000013931	110147	Ehmt2	Ehmt2	ENSMUSP00000033720	245688	Rbbp7	Rbbp7	947
ENSMUSP00000013931	110147	Ehmt2	Ehmt2	ENSMUSP00000025183	19763	Ring1	Ring1	945
ENSMUSP00000013931	110147	Ehmt2	Ehmt2	ENSMUSP00000031862	629578	Cbx3-ps6	Cbx3-ps6	965
ENSMUSP00000015138	13717	Eln	Eln	ENSMUSP00000028633	14118	Fbn1	Fbn1	878
ENSMUSP00000015138	13717	Eln	Eln	ENSMUSP00000066488	11606	Agt	Agt	816
ENSMUSP00000015138	13717	Eln	Eln	ENSMUSP00000105173	13003	Vcan	Vcan	727
ENSMUSP00000015667	13040	Ctss	Ctss	ENSMUSP00000048836	12259	C1qa	C1qa	929
ENSMUSP00000015667	13040	Ctss	Ctss	ENSMUSP00000032629	20430	Cyfip1	Cyfip1	903
ENSMUSP00000015667	13040	Ctss	Ctss	ENSMUSP00000040246	12260	C1qb	C1qb	909
ENSMUSP00000015667	13040	Ctss	Ctss	ENSMUSP00000025523	12978	Csf1r	Csf1r	801
ENSMUSP00000015667	13040	Ctss	Ctss	ENSMUSP00000028938	13010	Cst3	Cst3	959
ENSMUSP00000015667	13040	Ctss	Ctss	ENSMUSP00000095316	15926	Idh1	Idh1	902
ENSMUSP00000015667	13040	Ctss	Ctss	ENSMUSP00000032800	22177	Tyrobp	Tyrobp	831
ENSMUSP00000015723	18091	Nkx2-5	Nkx2-5	ENSMUSP00000080538	140781	Myh7	Myh7	856
ENSMUSP00000015723	18091	Nkx2-5	Nkx2-5	ENSMUSP00000107717	21956	Tnnt2	Tnnt2	821
ENSMUSP00000015723	18091	Nkx2-5	Nkx2-5	ENSMUSP00000044983	15111	Hand2	Hand2	947
ENSMUSP00000015723	18091	Nkx2-5	Nkx2-5	ENSMUSP00000052591	57246	Tbx20	Tbx20	923
ENSMUSP00000015723	18091	Nkx2-5	Nkx2-5	ENSMUSP00000041774	14465	Gata6	Gata6	846
ENSMUSP00000015723	18091	Nkx2-5	Nkx2-5	ENSMUSP00000099985	17898	Myl7	Myl7	827
ENSMUSP00000015934	20930	Surf1	Surf1	ENSMUSP00000033176	67003	Uqcrc2	Uqcrc2	786
ENSMUSP00000015934	20930	Surf1	Surf1	ENSMUSP00000080993	17721	ND5	ND5	810
ENSMUSP00000015934	20930	Surf1	Surf1	ENSMUSP00000023210	66445	Cyc1	Cyc1	898
ENSMUSP00000016309	69660	Tmbim1	Tmbim1	ENSMUSP00000048092	12267	C3ar1	C3ar1	909
ENSMUSP00000016309	69660	Tmbim1	Tmbim1	ENSMUSP00000022197	107767	Scamp1	Scamp1	901
ENSMUSP00000016309	69660	Tmbim1	Tmbim1	ENSMUSP00000048041	12509	Cd59a	Cd59a	906
ENSMUSP00000016309	69660	Tmbim1	Tmbim1	ENSMUSP00000088174	109905	Rap1a	Rap1a	900
ENSMUSP00000016309	69660	Tmbim1	Tmbim1	ENSMUSP00000034878	69981	Tmem30a	Tmem30a	900
ENSMUSP00000017488	22370	Vtn	Vtn	ENSMUSP00000028348	16420	Itgb6	Itgb6	745
ENSMUSP00000017488	22370	Vtn	Vtn	ENSMUSP00000105663	14083	Ptk2	Ptk2	842
ENSMUSP00000017488	22370	Vtn	Vtn	ENSMUSP00000027467	20720	Serpine2	Serpine2	775
ENSMUSP00000017961	59091	Jph2	Jph2	ENSMUSP00000021750	20191	Ryr2	Ryr2	748
ENSMUSP00000018337	214498	Cdc73	Cdc73	ENSMUSP00000132117	225131	Wac	Wac	907
ENSMUSP00000018337	214498	Cdc73	Cdc73	ENSMUSP00000115578	22190	Ubc	Ubc	904
ENSMUSP00000018337	214498	Cdc73	Cdc73	ENSMUSP00000050771	20020	Polr2a	Polr2a	711
ENSMUSP00000018476	56274	Stk3	Stk3	ENSMUSP00000076751	80281	Cttnbp2nl	Cttnbp2nl	735
ENSMUSP00000018476	56274	Stk3	Stk3	ENSMUSP00000031003	269643	Ppp2r2c	Ppp2r2c	800
ENSMUSP00000018476	56274	Stk3	Stk3	ENSMUSP00000120830	268980	Strn	Strn	763
ENSMUSP00000018476	56274	Stk3	Stk3	ENSMUSP00000054452	232157	Mob1a	Mob1a	992
ENSMUSP00000018476	56274	Stk3	Stk3	ENSMUSP00000048267	213391	Rassf4	Rassf4	910
ENSMUSP00000018476	56274	Stk3	Stk3	ENSMUSP00000022842	12465	Cct5	Cct5	732
ENSMUSP00000018476	56274	Stk3	Stk3	ENSMUSP00000036477	320609	Strip2	Strip2	759
ENSMUSP00000018800	17896	Myl4	Myl4	ENSMUSP00000122925	21952	Tnni1	Tnni1	969
ENSMUSP00000018800	17896	Myl4	Myl4	ENSMUSP00000080538	140781	Myh7	Myh7	981
ENSMUSP00000018800	17896	Myl4	Myl4	ENSMUSP00000107717	21956	Tnnt2	Tnnt2	963
ENSMUSP00000018800	17896	Myl4	Myl4	ENSMUSP00000127070	17868	Mybpc3	Mybpc3	938
ENSMUSP00000018800	17896	Myl4	Myl4	ENSMUSP00000067708	11472	Actn2	Actn2	950
ENSMUSP00000018800	17896	Myl4	Myl4	ENSMUSP00000103402	21916	Tmod1	Tmod1	917
ENSMUSP00000018880	83431	Ndel1	Ndel1	ENSMUSP00000034803	26951	Zw10	Zw10	961
ENSMUSP00000018880	83431	Ndel1	Ndel1	ENSMUSP00000117153	67733	Itgb3bp	Itgb3bp	900
ENSMUSP00000018880	83431	Ndel1	Ndel1	ENSMUSP00000070726	226849	Ppp2r5a	Ppp2r5a	900
ENSMUSP00000018880	83431	Ndel1	Ndel1	ENSMUSP00000107192	56430	Clip1	Clip1	962
ENSMUSP00000019064	66102	Cxcl16	Cxcl16	ENSMUSP00000048092	12267	C3ar1	C3ar1	922
ENSMUSP00000019064	66102	Cxcl16	Cxcl16	ENSMUSP00000085293	13610	S1pr3	S1pr3	920
ENSMUSP00000019064	66102	Cxcl16	Cxcl16	ENSMUSP00000048836	12259	C1qa	C1qa	706
ENSMUSP00000019064	66102	Cxcl16	Cxcl16	ENSMUSP00000063670	574402	Gpr17	Gpr17	900
ENSMUSP00000019064	66102	Cxcl16	Cxcl16	ENSMUSP00000072800	20315	Cxcl12	Cxcl12	947
ENSMUSP00000019064	66102	Cxcl16	Cxcl16	ENSMUSP00000031320	56744	Pf4	Pf4	935
ENSMUSP00000019064	66102	Cxcl16	Cxcl16	ENSMUSP00000066488	11606	Agt	Agt	931
ENSMUSP00000019064	66102	Cxcl16	Cxcl16	ENSMUSP00000057543	14678	Gnai2	Gnai2	901
ENSMUSP00000019317	19345	Rab5c	Rab5c	ENSMUSP00000115578	22190	Ubc	Ubc	910
ENSMUSP00000019317	19345	Rab5c	Rab5c	ENSMUSP00000113322	19340	Rab3d	Rab3d	913
ENSMUSP00000019317	19345	Rab5c	Rab5c	ENSMUSP00000088174	109905	Rap1a	Rap1a	772
ENSMUSP00000019317	19345	Rab5c	Rab5c	ENSMUSP00000034878	69981	Tmem30a	Tmem30a	912
ENSMUSP00000019317	19345	Rab5c	Rab5c	ENSMUSP00000104864	170625	Snx18	Snx18	918
ENSMUSP00000019317	19345	Rab5c	Rab5c	ENSMUSP00000025811	68090	Yif1a	Yif1a	713
ENSMUSP00000019317	19345	Rab5c	Rab5c	ENSMUSP00000048092	12267	C3ar1	C3ar1	900
ENSMUSP00000019317	19345	Rab5c	Rab5c	ENSMUSP00000031377	12492	Scarb2	Scarb2	906
ENSMUSP00000019317	19345	Rab5c	Rab5c	ENSMUSP00000108075	58194	Sh3kbp1	Sh3kbp1	915
ENSMUSP00000019317	19345	Rab5c	Rab5c	ENSMUSP00000100862	12512	Cd63	Cd63	939
ENSMUSP00000019317	19345	Rab5c	Rab5c	ENSMUSP00000093905	209018	Vps8	Vps8	706
ENSMUSP00000019317	19345	Rab5c	Rab5c	ENSMUSP00000024599	16004	Igf2r	Igf2r	911
ENSMUSP00000019317	19345	Rab5c	Rab5c	ENSMUSP00000019631	106628	Trip10	Trip10	904
ENSMUSP00000019317	19345	Rab5c	Rab5c	ENSMUSP00000070134	19328	Rab12	Rab12	935
ENSMUSP00000019317	19345	Rab5c	Rab5c	ENSMUSP00000029257	76295	Atp11b	Atp11b	904
ENSMUSP00000019323	17448	Mdh2	Mdh2	ENSMUSP00000026196	14718	Got1	Got1	953
ENSMUSP00000019323	17448	Mdh2	Mdh2	ENSMUSP00000060346	78920	Dlst	Dlst	804
ENSMUSP00000019323	17448	Mdh2	Mdh2	ENSMUSP00000028892	170718	Idh3b	Idh3b	843
ENSMUSP00000019323	17448	Mdh2	Mdh2	ENSMUSP00000023043	11564	Adsl	Adsl	850
ENSMUSP00000019323	17448	Mdh2	Mdh2	ENSMUSP00000101003	75406	Ndufs7	Ndufs7	760
ENSMUSP00000019323	17448	Mdh2	Mdh2	ENSMUSP00000127526	67834	Idh3a	Idh3a	879
ENSMUSP00000019323	17448	Mdh2	Mdh2	ENSMUSP00000123765	20916	Sucla2	Sucla2	737
ENSMUSP00000019323	17448	Mdh2	Mdh2	ENSMUSP00000033176	67003	Uqcrc2	Uqcrc2	782
ENSMUSP00000019323	17448	Mdh2	Mdh2	ENSMUSP00000136273	22335	Vdac3	Vdac3	729
ENSMUSP00000019323	17448	Mdh2	Mdh2	ENSMUSP00000095316	15926	Idh1	Idh1	789
ENSMUSP00000019323	17448	Mdh2	Mdh2	ENSMUSP00000032856	109264	Me3	Me3	953
ENSMUSP00000019323	17448	Mdh2	Mdh2	ENSMUSP00000079727	13806	Eno1	Eno1	767
ENSMUSP00000019323	17448	Mdh2	Mdh2	ENSMUSP00000023210	66445	Cyc1	Cyc1	902
ENSMUSP00000019323	17448	Mdh2	Mdh2	ENSMUSP00000023116	11429	Aco2	Aco2	935
ENSMUSP00000019323	17448	Mdh2	Mdh2	ENSMUSP00000023116	78929	Polr3h	Polr3h	935
ENSMUSP00000019323	17448	Mdh2	Mdh2	ENSMUSP00000022268	68263	Pdhb	Pdhb	753
ENSMUSP00000019323	17448	Mdh2	Mdh2	ENSMUSP00000136544	18655	Pgk1	Pgk1	749
ENSMUSP00000019323	17448	Mdh2	Mdh2	ENSMUSP00000103007	269951	Idh2	Idh2	900
ENSMUSP00000019323	17448	Mdh2	Mdh2	ENSMUSP00000065113	56451	Suclg1	Suclg1	958
ENSMUSP00000019631	106628	Trip10	Trip10	ENSMUSP00000020101	69288	Rhobtb1	Rhobtb1	918
ENSMUSP00000019631	106628	Trip10	Trip10	ENSMUSP00000031377	12492	Scarb2	Scarb2	905
ENSMUSP00000019631	106628	Trip10	Trip10	ENSMUSP00000115578	22190	Ubc	Ubc	903
ENSMUSP00000019631	106628	Trip10	Trip10	ENSMUSP00000108075	58194	Sh3kbp1	Sh3kbp1	900
ENSMUSP00000019631	106628	Trip10	Trip10	ENSMUSP00000024599	16004	Igf2r	Igf2r	901
ENSMUSP00000019631	106628	Trip10	Trip10	ENSMUSP00000054634	12540	Cdc42	Cdc42	703
ENSMUSP00000019631	106628	Trip10	Trip10	ENSMUSP00000024956	104215	Rhoq	Rhoq	922
ENSMUSP00000019631	106628	Trip10	Trip10	ENSMUSP00000104864	170625	Snx18	Snx18	922
ENSMUSP00000019998	64058	Perp	Perp	ENSMUSP00000099815	227937	Pkp4	Pkp4	915
ENSMUSP00000019998	64058	Perp	Perp	ENSMUSP00000115062	109620	Dsp	Dsp	970
ENSMUSP00000020101	69288	Rhobtb1	Rhobtb1	ENSMUSP00000081132	269608	Plekhg5	Plekhg5	919
ENSMUSP00000020101	69288	Rhobtb1	Rhobtb1	ENSMUSP00000024956	104215	Rhoq	Rhoq	910
ENSMUSP00000020101	69288	Rhobtb1	Rhobtb1	ENSMUSP00000044491	236920	Stard8	Stard8	908
ENSMUSP00000020101	69288	Rhobtb1	Rhobtb1	ENSMUSP00000126598	69632	Arhgef12	Arhgef12	932
ENSMUSP00000020171	14219	Ccn2	Ccn2	ENSMUSP00000031668	12843	Col1a2	Col1a2	775
ENSMUSP00000020171	14219	Ccn2	Ccn2	ENSMUSP00000028633	14118	Fbn1	Fbn1	763
ENSMUSP00000020171	14219	Ccn2	Ccn2	ENSMUSP00000072800	20315	Cxcl12	Cxcl12	786
ENSMUSP00000020171	14219	Ccn2	Ccn2	ENSMUSP00000066488	11606	Agt	Agt	876
ENSMUSP00000020258	67345	Herc4	Herc4	ENSMUSP00000060124	14794	Spsb2	Spsb2	900
ENSMUSP00000020258	67345	Herc4	Herc4	ENSMUSP00000034740	17999	Nedd4	Nedd4	911
ENSMUSP00000020258	67345	Herc4	Herc4	ENSMUSP00000115578	22190	Ubc	Ubc	920
ENSMUSP00000020258	67345	Herc4	Herc4	ENSMUSP00000113928	56317	Anapc7	Anapc7	948
ENSMUSP00000020258	67345	Herc4	Herc4	ENSMUSP00000083393	59008	Anapc5	Anapc5	902
ENSMUSP00000020258	67345	Herc4	Herc4	ENSMUSP00000125745	84585	Rnf123	Rnf123	904
ENSMUSP00000020258	67345	Herc4	Herc4	ENSMUSP00000040025	73998	Herc3	Herc3	903
ENSMUSP00000020258	67345	Herc4	Herc4	ENSMUSP00000136449	207304	Hectd1	Hectd1	914
ENSMUSP00000020258	67345	Herc4	Herc4	ENSMUSP00000049528	19647	Rbbp6	Rbbp6	909
ENSMUSP00000020258	67345	Herc4	Herc4	ENSMUSP00000087810	142687	Asb14	Asb14	905
ENSMUSP00000020258	67345	Herc4	Herc4	ENSMUSP00000100058	22214	Ube2h	Ube2h	913
ENSMUSP00000020258	67345	Herc4	Herc4	ENSMUSP00000034529	75717	Cul5	Cul5	906
ENSMUSP00000020258	67345	Herc4	Herc4	ENSMUSP00000058233	269529	Fbxo10	Fbxo10	900
ENSMUSP00000020397	67332	Snrpd3	Snrpd3	ENSMUSP00000110103	53379	Hnrnpa2b1	Hnrnpa2b1	987
ENSMUSP00000020397	67332	Snrpd3	Snrpd3	ENSMUSP00000078469	27967	Cherp	Cherp	902
ENSMUSP00000020397	67332	Snrpd3	Snrpd3	ENSMUSP00000023882	68188	Sympk	Sympk	909
ENSMUSP00000020397	67332	Snrpd3	Snrpd3	ENSMUSP00000031349	76167	Snrnp35	Snrnp35	988
ENSMUSP00000020397	67332	Snrpd3	Snrpd3	ENSMUSP00000112213	60321	Wbp11	Wbp11	901
ENSMUSP00000020397	67332	Snrpd3	Snrpd3	ENSMUSP00000125761	17184	Matr3	Matr3	765
ENSMUSP00000020397	67332	Snrpd3	Snrpd3	ENSMUSP00000085993	75956	Srrm2	Srrm2	973
ENSMUSP00000020397	67332	Snrpd3	Snrpd3	ENSMUSP00000125590	231889	Bud31	Bud31	991
ENSMUSP00000020397	67332	Snrpd3	Snrpd3	ENSMUSP00000037268	232989	Hnrnpul1	Hnrnpul1	911
ENSMUSP00000020397	67332	Snrpd3	Snrpd3	ENSMUSP00000043123	83701	Srrt	Srrt	935
ENSMUSP00000020397	67332	Snrpd3	Snrpd3	ENSMUSP00000107595	545592	Gm11847	Gm11847	952
ENSMUSP00000020397	67332	Snrpd3	Snrpd3	ENSMUSP00000136858	28000	Prpf19	Prpf19	995
ENSMUSP00000020478	67933	Hcfc2	Hcfc2	ENSMUSP00000109585	140858	Wdr5	Wdr5	821
ENSMUSP00000021271	18626	Per1	Per1	ENSMUSP00000115578	22190	Ubc	Ubc	901
ENSMUSP00000021271	18626	Per1	Per1	ENSMUSP00000034508	53376	Usp2	Usp2	820
ENSMUSP00000021443	108156	Mthfd1	Mthfd1	ENSMUSP00000097442	238505	Mtr	Mtr	974
ENSMUSP00000021512	66375	Dhrs7	Dhrs7	ENSMUSP00000032844	66271	Tmem126a	Tmem126a	756
ENSMUSP00000021750	20191	Ryr2	Ryr2	ENSMUSP00000108413	12288	Cacna1c	Cacna1c	924
ENSMUSP00000021750	20191	Ryr2	Ryr2	ENSMUSP00000080538	140781	Myh7	Myh7	786
ENSMUSP00000021750	20191	Ryr2	Ryr2	ENSMUSP00000107717	21956	Tnnt2	Tnnt2	741
ENSMUSP00000021750	20191	Ryr2	Ryr2	ENSMUSP00000083725	20541	Slc8a1	Slc8a1	713
ENSMUSP00000021750	20191	Ryr2	Ryr2	ENSMUSP00000082459	15464	Hrc	Hrc	760
ENSMUSP00000021940	66890	Lman2	Lman2	ENSMUSP00000121820	193813	Mcfd2	Mcfd2	951
ENSMUSP00000021940	66890	Lman2	Lman2	ENSMUSP00000048041	12509	Cd59a	Cd59a	900
ENSMUSP00000021970	57266	Cxcl14	Cxcl14	ENSMUSP00000072800	20315	Cxcl12	Cxcl12	741
ENSMUSP00000022082	93692	Glrx	Glrx	ENSMUSP00000040956	109232	Sccpdh	Sccpdh	725
ENSMUSP00000022089	28077	Med10	Med10	ENSMUSP00000085416	17979	Ncoa3	Ncoa3	902
ENSMUSP00000022089	28077	Med10	Med10	ENSMUSP00000031640	264064	Cdk8	Cdk8	992
ENSMUSP00000022089	28077	Med10	Med10	ENSMUSP00000050771	20020	Polr2a	Polr2a	783
ENSMUSP00000022089	28077	Med10	Med10	ENSMUSP00000068974	20185	Ncor1	Ncor1	900
ENSMUSP00000022197	107767	Scamp1	Scamp1	ENSMUSP00000048092	12267	C3ar1	C3ar1	900
ENSMUSP00000022197	107767	Scamp1	Scamp1	ENSMUSP00000048041	12509	Cd59a	Cd59a	900
ENSMUSP00000022197	107767	Scamp1	Scamp1	ENSMUSP00000088174	109905	Rap1a	Rap1a	909
ENSMUSP00000022197	107767	Scamp1	Scamp1	ENSMUSP00000034878	69981	Tmem30a	Tmem30a	910
ENSMUSP00000022213	21828	Thbs4	Thbs4	ENSMUSP00000077132	109700	Itga1	Itga1	726
ENSMUSP00000022268	68263	Pdhb	Pdhb	ENSMUSP00000032856	109264	Me3	Me3	920
ENSMUSP00000022268	68263	Pdhb	Pdhb	ENSMUSP00000068086	52815	Ldhd	Ldhd	940
ENSMUSP00000022268	68263	Pdhb	Pdhb	ENSMUSP00000060346	78920	Dlst	Dlst	987
ENSMUSP00000022268	68263	Pdhb	Pdhb	ENSMUSP00000022286	17993	Ndufs4	Ndufs4	757
ENSMUSP00000022268	68263	Pdhb	Pdhb	ENSMUSP00000079727	13806	Eno1	Eno1	731
ENSMUSP00000022268	68263	Pdhb	Pdhb	ENSMUSP00000023210	66445	Cyc1	Cyc1	761
ENSMUSP00000022268	68263	Pdhb	Pdhb	ENSMUSP00000127526	67834	Idh3a	Idh3a	872
ENSMUSP00000022268	68263	Pdhb	Pdhb	ENSMUSP00000123765	20916	Sucla2	Sucla2	908
ENSMUSP00000022268	68263	Pdhb	Pdhb	ENSMUSP00000023116	11429	Aco2	Aco2	940
ENSMUSP00000022268	68263	Pdhb	Pdhb	ENSMUSP00000023116	78929	Polr3h	Polr3h	940
ENSMUSP00000022268	68263	Pdhb	Pdhb	ENSMUSP00000033176	67003	Uqcrc2	Uqcrc2	878
ENSMUSP00000022268	68263	Pdhb	Pdhb	ENSMUSP00000027478	67273	Ndufa10	Ndufa10	798
ENSMUSP00000022268	68263	Pdhb	Pdhb	ENSMUSP00000034567	235339	Dlat	Dlat	999
ENSMUSP00000022268	68263	Pdhb	Pdhb	ENSMUSP00000092821	382051	Pdp2	Pdp2	956
ENSMUSP00000022268	68263	Pdhb	Pdhb	ENSMUSP00000071292	12039	Bckdha	Bckdha	999
ENSMUSP00000022268	68263	Pdhb	Pdhb	ENSMUSP00000065113	56451	Suclg1	Suclg1	933
ENSMUSP00000022268	68263	Pdhb	Pdhb	ENSMUSP00000046639	319518	Pdpr	Pdpr	931
ENSMUSP00000022286	17993	Ndufs4	Ndufs4	ENSMUSP00000101003	75406	Ndufs7	Ndufs7	999
ENSMUSP00000022286	17993	Ndufs4	Ndufs4	ENSMUSP00000023210	66445	Cyc1	Cyc1	993
ENSMUSP00000022286	17993	Ndufs4	Ndufs4	ENSMUSP00000130532	75597	Ndufaf2	Ndufaf2	957
ENSMUSP00000022286	17993	Ndufs4	Ndufs4	ENSMUSP00000029925	68493	Ndufaf4	Ndufaf4	937
ENSMUSP00000022286	17993	Ndufs4	Ndufs4	ENSMUSP00000033176	67003	Uqcrc2	Uqcrc2	996
ENSMUSP00000022286	17993	Ndufs4	Ndufs4	ENSMUSP00000027478	67273	Ndufa10	Ndufa10	996
ENSMUSP00000022286	17993	Ndufs4	Ndufs4	ENSMUSP00000023514	68194	Ndufb4	Ndufb4	999
ENSMUSP00000022286	17993	Ndufs4	Ndufs4	ENSMUSP00000037341	66916	Ndufb7	Ndufb7	999
ENSMUSP00000022286	17993	Ndufs4	Ndufs4	ENSMUSP00000137424	26940	Ecsit	Ecsit	935
ENSMUSP00000022419	105675	Ppif	Ppif	ENSMUSP00000136273	22335	Vdac3	Vdac3	954
ENSMUSP00000022419	105675	Ppif	Ppif	ENSMUSP00000125590	231889	Bud31	Bud31	725
ENSMUSP00000022480	115488338	Gm52134	Gm52134	ENSMUSP00000026196	14718	Got1	Got1	862
ENSMUSP00000022480	239017	Ogdhl	Ogdhl	ENSMUSP00000026196	14718	Got1	Got1	862
ENSMUSP00000022480	115488338	Gm52134	Gm52134	ENSMUSP00000060346	78920	Dlst	Dlst	998
ENSMUSP00000022480	239017	Ogdhl	Ogdhl	ENSMUSP00000060346	78920	Dlst	Dlst	998
ENSMUSP00000022480	115488338	Gm52134	Gm52134	ENSMUSP00000028892	170718	Idh3b	Idh3b	953
ENSMUSP00000022480	239017	Ogdhl	Ogdhl	ENSMUSP00000028892	170718	Idh3b	Idh3b	953
ENSMUSP00000022480	115488338	Gm52134	Gm52134	ENSMUSP00000023043	11564	Adsl	Adsl	826
ENSMUSP00000022480	239017	Ogdhl	Ogdhl	ENSMUSP00000023043	11564	Adsl	Adsl	826
ENSMUSP00000022480	115488338	Gm52134	Gm52134	ENSMUSP00000127526	67834	Idh3a	Idh3a	971
ENSMUSP00000022480	239017	Ogdhl	Ogdhl	ENSMUSP00000127526	67834	Idh3a	Idh3a	971
ENSMUSP00000022480	115488338	Gm52134	Gm52134	ENSMUSP00000123765	20916	Sucla2	Sucla2	771
ENSMUSP00000022480	239017	Ogdhl	Ogdhl	ENSMUSP00000123765	20916	Sucla2	Sucla2	771
ENSMUSP00000022480	115488338	Gm52134	Gm52134	ENSMUSP00000034567	235339	Dlat	Dlat	804
ENSMUSP00000022480	239017	Ogdhl	Ogdhl	ENSMUSP00000034567	235339	Dlat	Dlat	804
ENSMUSP00000022480	115488338	Gm52134	Gm52134	ENSMUSP00000095316	15926	Idh1	Idh1	946
ENSMUSP00000022480	239017	Ogdhl	Ogdhl	ENSMUSP00000095316	15926	Idh1	Idh1	946
ENSMUSP00000022480	115488338	Gm52134	Gm52134	ENSMUSP00000034136	108682	Gpt2	Gpt2	830
ENSMUSP00000022480	239017	Ogdhl	Ogdhl	ENSMUSP00000034136	108682	Gpt2	Gpt2	830
ENSMUSP00000022480	115488338	Gm52134	Gm52134	ENSMUSP00000023116	11429	Aco2	Aco2	769
ENSMUSP00000022480	115488338	Gm52134	Gm52134	ENSMUSP00000023116	78929	Polr3h	Polr3h	769
ENSMUSP00000022480	239017	Ogdhl	Ogdhl	ENSMUSP00000023116	11429	Aco2	Aco2	769
ENSMUSP00000022480	239017	Ogdhl	Ogdhl	ENSMUSP00000023116	78929	Polr3h	Polr3h	769
ENSMUSP00000022480	115488338	Gm52134	Gm52134	ENSMUSP00000103007	269951	Idh2	Idh2	946
ENSMUSP00000022480	239017	Ogdhl	Ogdhl	ENSMUSP00000103007	269951	Idh2	Idh2	946
ENSMUSP00000022480	115488338	Gm52134	Gm52134	ENSMUSP00000065113	56451	Suclg1	Suclg1	882
ENSMUSP00000022480	239017	Ogdhl	Ogdhl	ENSMUSP00000065113	56451	Suclg1	Suclg1	882
ENSMUSP00000022691	15460	Hr	Hr	ENSMUSP00000033720	245688	Rbbp7	Rbbp7	720
ENSMUSP00000022691	15460	Hr	Hr	ENSMUSP00000060054	107932	Chd4	Chd4	726
ENSMUSP00000022691	15460	Hr	Hr	ENSMUSP00000101307	68703	Rere	Rere	720
ENSMUSP00000022691	15460	Hr	Hr	ENSMUSP00000113157	12419	Cbx5	Cbx5	720
ENSMUSP00000022693	12153	Bmp1	Bmp1	ENSMUSP00000031668	12843	Col1a2	Col1a2	947
ENSMUSP00000022766	268741	Tox4	Tox4	ENSMUSP00000070726	226849	Ppp2r5a	Ppp2r5a	726
ENSMUSP00000022766	268741	Tox4	Tox4	ENSMUSP00000104234	67181	Ctdnep1	Ctdnep1	730
ENSMUSP00000022842	12465	Cct5	Cct5	ENSMUSP00000033683	20102	Rps4x	Rps4x	750
ENSMUSP00000022842	12465	Cct5	Cct5	ENSMUSP00000031003	269643	Ppp2r2c	Ppp2r2c	732
ENSMUSP00000022842	12465	Cct5	Cct5	ENSMUSP00000034966	67891	Rpl4	Rpl4	841
ENSMUSP00000022842	12465	Cct5	Cct5	ENSMUSP00000080854	100503670	Rpl5	Rpl5	752
ENSMUSP00000022842	12465	Cct5	Cct5	ENSMUSP00000029082	26444	Psma7	Psma7	743
ENSMUSP00000022842	12465	Cct5	Cct5	ENSMUSP00000120528	67427	Rps20	Rps20	742
ENSMUSP00000022842	12465	Cct5	Cct5	ENSMUSP00000120830	268980	Strn	Strn	732
ENSMUSP00000023043	11564	Adsl	Adsl	ENSMUSP00000028892	170718	Idh3b	Idh3b	842
ENSMUSP00000023043	11564	Adsl	Adsl	ENSMUSP00000127526	67834	Idh3a	Idh3a	856
ENSMUSP00000023043	11564	Adsl	Adsl	ENSMUSP00000103007	269951	Idh2	Idh2	872
ENSMUSP00000023043	11564	Adsl	Adsl	ENSMUSP00000046601	18575	Pde1c	Pde1c	902
ENSMUSP00000023043	11564	Adsl	Adsl	ENSMUSP00000095316	15926	Idh1	Idh1	868
ENSMUSP00000023043	11564	Adsl	Adsl	ENSMUSP00000034992	23959	Nt5e	Nt5e	923
ENSMUSP00000023043	11564	Adsl	Adsl	ENSMUSP00000038749	54611	Pde3a	Pde3a	900
ENSMUSP00000023048	239555	Mief1	Mief1	ENSMUSP00000124223	74143	Opa1	Opa1	723
ENSMUSP00000023048	239555	Mief1	Mief1	ENSMUSP00000077446	75734	Mff	Mff	885
ENSMUSP00000023048	239555	Mief1	Mief1	ENSMUSP00000111415	74006	Dnm1l	Dnm1l	891
ENSMUSP00000023072	170736	Parvb	Parvb	ENSMUSP00000032559	20167	Rtn2	Rtn2	712
ENSMUSP00000023072	170736	Parvb	Parvb	ENSMUSP00000028348	16420	Itgb6	Itgb6	775
ENSMUSP00000023072	170736	Parvb	Parvb	ENSMUSP00000025254	225341	Lims2	Lims2	783
ENSMUSP00000023116	11429	Aco2	Aco2	ENSMUSP00000060346	78920	Dlst	Dlst	911
ENSMUSP00000023116	78929	Polr3h	Polr3h	ENSMUSP00000060346	78920	Dlst	Dlst	911
ENSMUSP00000023116	11429	Aco2	Aco2	ENSMUSP00000028892	170718	Idh3b	Idh3b	996
ENSMUSP00000023116	78929	Polr3h	Polr3h	ENSMUSP00000028892	170718	Idh3b	Idh3b	996
ENSMUSP00000023116	11429	Aco2	Aco2	ENSMUSP00000100038	11428	Aco1	Aco1	926
ENSMUSP00000023116	78929	Polr3h	Polr3h	ENSMUSP00000100038	11428	Aco1	Aco1	926
ENSMUSP00000023116	11429	Aco2	Aco2	ENSMUSP00000127526	67834	Idh3a	Idh3a	998
ENSMUSP00000023116	78929	Polr3h	Polr3h	ENSMUSP00000127526	67834	Idh3a	Idh3a	998
ENSMUSP00000023116	11429	Aco2	Aco2	ENSMUSP00000123765	20916	Sucla2	Sucla2	886
ENSMUSP00000023116	78929	Polr3h	Polr3h	ENSMUSP00000123765	20916	Sucla2	Sucla2	886
ENSMUSP00000023116	11429	Aco2	Aco2	ENSMUSP00000033176	67003	Uqcrc2	Uqcrc2	719
ENSMUSP00000023116	78929	Polr3h	Polr3h	ENSMUSP00000033176	67003	Uqcrc2	Uqcrc2	719
ENSMUSP00000023116	11429	Aco2	Aco2	ENSMUSP00000034567	235339	Dlat	Dlat	747
ENSMUSP00000023116	78929	Polr3h	Polr3h	ENSMUSP00000034567	235339	Dlat	Dlat	747
ENSMUSP00000023116	11429	Aco2	Aco2	ENSMUSP00000095316	15926	Idh1	Idh1	972
ENSMUSP00000023116	78929	Polr3h	Polr3h	ENSMUSP00000095316	15926	Idh1	Idh1	972
ENSMUSP00000023116	11429	Aco2	Aco2	ENSMUSP00000122103	78830	Slc25a12	Slc25a12	774
ENSMUSP00000023116	78929	Polr3h	Polr3h	ENSMUSP00000122103	78830	Slc25a12	Slc25a12	774
ENSMUSP00000023116	11429	Aco2	Aco2	ENSMUSP00000023210	66445	Cyc1	Cyc1	858
ENSMUSP00000023116	78929	Polr3h	Polr3h	ENSMUSP00000023210	66445	Cyc1	Cyc1	858
ENSMUSP00000023116	11429	Aco2	Aco2	ENSMUSP00000027478	67273	Ndufa10	Ndufa10	861
ENSMUSP00000023116	78929	Polr3h	Polr3h	ENSMUSP00000027478	67273	Ndufa10	Ndufa10	861
ENSMUSP00000023116	11429	Aco2	Aco2	ENSMUSP00000103007	269951	Idh2	Idh2	978
ENSMUSP00000023116	78929	Polr3h	Polr3h	ENSMUSP00000103007	269951	Idh2	Idh2	978
ENSMUSP00000023116	11429	Aco2	Aco2	ENSMUSP00000065113	56451	Suclg1	Suclg1	872
ENSMUSP00000023116	78929	Polr3h	Polr3h	ENSMUSP00000065113	56451	Suclg1	Suclg1	872
ENSMUSP00000023151	12053	Bcl6	Bcl6	ENSMUSP00000068974	20185	Ncor1	Ncor1	827
ENSMUSP00000023161	106393	Srl	Srl	ENSMUSP00000034053	53318	Pdlim3	Pdlim3	745
ENSMUSP00000023161	106393	Srl	Srl	ENSMUSP00000107717	21956	Tnnt2	Tnnt2	771
ENSMUSP00000023210	66445	Cyc1	Cyc1	ENSMUSP00000060346	78920	Dlst	Dlst	848
ENSMUSP00000023210	66445	Cyc1	Cyc1	ENSMUSP00000028892	170718	Idh3b	Idh3b	855
ENSMUSP00000023210	66445	Cyc1	Cyc1	ENSMUSP00000101003	75406	Ndufs7	Ndufs7	998
ENSMUSP00000023210	66445	Cyc1	Cyc1	ENSMUSP00000096193	12865	Cox7a1	Cox7a1	888
ENSMUSP00000023210	66445	Cyc1	Cyc1	ENSMUSP00000130532	75597	Ndufaf2	Ndufaf2	903
ENSMUSP00000023210	66445	Cyc1	Cyc1	ENSMUSP00000123765	20916	Sucla2	Sucla2	749
ENSMUSP00000023210	66445	Cyc1	Cyc1	ENSMUSP00000029925	68493	Ndufaf4	Ndufaf4	909
ENSMUSP00000023210	66445	Cyc1	Cyc1	ENSMUSP00000033176	67003	Uqcrc2	Uqcrc2	999
ENSMUSP00000023210	66445	Cyc1	Cyc1	ENSMUSP00000027478	67273	Ndufa10	Ndufa10	996
ENSMUSP00000023210	66445	Cyc1	Cyc1	ENSMUSP00000023514	68194	Ndufb4	Ndufb4	978
ENSMUSP00000023210	66445	Cyc1	Cyc1	ENSMUSP00000080993	17721	ND5	ND5	947
ENSMUSP00000023210	66445	Cyc1	Cyc1	ENSMUSP00000037341	66916	Ndufb7	Ndufb7	996
ENSMUSP00000023210	66445	Cyc1	Cyc1	ENSMUSP00000065113	56451	Suclg1	Suclg1	929
ENSMUSP00000023507	56637	Gsk3b	Gsk3b	ENSMUSP00000069851	320404	Itpkb	Itpkb	838
ENSMUSP00000023507	56637	Gsk3b	Gsk3b	ENSMUSP00000060858	20019	Polr1a	Polr1a	902
ENSMUSP00000023507	56637	Gsk3b	Gsk3b	ENSMUSP00000115578	22190	Ubc	Ubc	914
ENSMUSP00000023507	56637	Gsk3b	Gsk3b	ENSMUSP00000070726	226849	Ppp2r5a	Ppp2r5a	925
ENSMUSP00000023507	56637	Gsk3b	Gsk3b	ENSMUSP00000029082	26444	Psma7	Psma7	921
ENSMUSP00000023507	56637	Gsk3b	Gsk3b	ENSMUSP00000071589	19185	Psmd4	Psmd4	912
ENSMUSP00000023507	56637	Gsk3b	Gsk3b	ENSMUSP00000032824	23996	Psmc4	Psmc4	909
ENSMUSP00000023514	68194	Ndufb4	Ndufb4	ENSMUSP00000033176	67003	Uqcrc2	Uqcrc2	981
ENSMUSP00000023514	68194	Ndufb4	Ndufb4	ENSMUSP00000027478	67273	Ndufa10	Ndufa10	997
ENSMUSP00000023514	68194	Ndufb4	Ndufb4	ENSMUSP00000037341	66916	Ndufb7	Ndufb7	995
ENSMUSP00000023514	68194	Ndufb4	Ndufb4	ENSMUSP00000101003	75406	Ndufs7	Ndufs7	995
ENSMUSP00000023514	68194	Ndufb4	Ndufb4	ENSMUSP00000130532	75597	Ndufaf2	Ndufaf2	905
ENSMUSP00000023514	68194	Ndufb4	Ndufb4	ENSMUSP00000137424	26940	Ecsit	Ecsit	904
ENSMUSP00000023514	68194	Ndufb4	Ndufb4	ENSMUSP00000029925	68493	Ndufaf4	Ndufaf4	912
ENSMUSP00000023611	23794	Adamts5	Adamts5	ENSMUSP00000105173	13003	Vcan	Vcan	741
ENSMUSP00000023687	15980	Ifngr2	Ifngr2	ENSMUSP00000064394	16452	Jak2	Jak2	982
ENSMUSP00000023882	68188	Sympk	Sympk	ENSMUSP00000110103	53379	Hnrnpa2b1	Hnrnpa2b1	916
ENSMUSP00000023882	68188	Sympk	Sympk	ENSMUSP00000078469	27967	Cherp	Cherp	903
ENSMUSP00000023882	68188	Sympk	Sympk	ENSMUSP00000049528	19647	Rbbp6	Rbbp6	840
ENSMUSP00000023882	68188	Sympk	Sympk	ENSMUSP00000112213	60321	Wbp11	Wbp11	902
ENSMUSP00000023882	68188	Sympk	Sympk	ENSMUSP00000085993	75956	Srrm2	Srrm2	905
ENSMUSP00000023882	68188	Sympk	Sympk	ENSMUSP00000125590	231889	Bud31	Bud31	902
ENSMUSP00000023882	68188	Sympk	Sympk	ENSMUSP00000037268	232989	Hnrnpul1	Hnrnpul1	914
ENSMUSP00000023882	68188	Sympk	Sympk	ENSMUSP00000043123	83701	Srrt	Srrt	914
ENSMUSP00000023882	68188	Sympk	Sympk	ENSMUSP00000107595	545592	Gm11847	Gm11847	916
ENSMUSP00000023882	68188	Sympk	Sympk	ENSMUSP00000136858	28000	Prpf19	Prpf19	907
ENSMUSP00000023994	12258	Serping1	Serping1	ENSMUSP00000071370	66866	Nhlrc2	Nhlrc2	900
ENSMUSP00000023994	12258	Serping1	Serping1	ENSMUSP00000040956	109232	Sccpdh	Sccpdh	900
ENSMUSP00000023994	12258	Serping1	Serping1	ENSMUSP00000107873	22371	Vwf	Vwf	929
ENSMUSP00000023994	12258	Serping1	Serping1	ENSMUSP00000048836	12259	C1qa	C1qa	981
ENSMUSP00000023994	12258	Serping1	Serping1	ENSMUSP00000024748	56055	Gtpbp2	Gtpbp2	900
ENSMUSP00000023994	12258	Serping1	Serping1	ENSMUSP00000048667	74145	F13a1	F13a1	919
ENSMUSP00000023994	12258	Serping1	Serping1	ENSMUSP00000031320	56744	Pf4	Pf4	916
ENSMUSP00000023994	12258	Serping1	Serping1	ENSMUSP00000107607	12628	Cfh	Cfh	749
ENSMUSP00000023994	12258	Serping1	Serping1	ENSMUSP00000040246	12260	C1qb	C1qb	963
ENSMUSP00000023994	12258	Serping1	Serping1	ENSMUSP00000057462	53612	Vti1b	Vti1b	900
ENSMUSP00000023994	12258	Serping1	Serping1	ENSMUSP00000139376	667277	C1rb	C1rb	993
ENSMUSP00000023994	12258	Serping1	Serping1	ENSMUSP00000067708	11472	Actn2	Actn2	903
ENSMUSP00000024599	16004	Igf2r	Igf2r	ENSMUSP00000032800	22177	Tyrobp	Tyrobp	900
ENSMUSP00000024599	16004	Igf2r	Igf2r	ENSMUSP00000031377	12492	Scarb2	Scarb2	948
ENSMUSP00000024599	16004	Igf2r	Igf2r	ENSMUSP00000115578	22190	Ubc	Ubc	903
ENSMUSP00000024599	16004	Igf2r	Igf2r	ENSMUSP00000108075	58194	Sh3kbp1	Sh3kbp1	900
ENSMUSP00000024599	16004	Igf2r	Igf2r	ENSMUSP00000080159	15015	H2-Q4	H2-Q4	900
ENSMUSP00000024599	16004	Igf2r	Igf2r	ENSMUSP00000099475	67300	Cltc	Cltc	770
ENSMUSP00000024599	16004	Igf2r	Igf2r	ENSMUSP00000056888	54609	Ubqln2	Ubqln2	902
ENSMUSP00000024599	16004	Igf2r	Igf2r	ENSMUSP00000033160	74105	Gga2	Gga2	924
ENSMUSP00000024599	16004	Igf2r	Igf2r	ENSMUSP00000104864	170625	Snx18	Snx18	915
ENSMUSP00000024702	76498	Paqr4	Paqr4	ENSMUSP00000026134	68515	Myadml2	Myadml2	819
ENSMUSP00000024734	68463	Mrpl14	Mrpl14	ENSMUSP00000024763	68565	Mrps18a	Mrps18a	993
ENSMUSP00000024734	68463	Mrpl14	Mrpl14	ENSMUSP00000048348	232536	Mrps35	Mrps35	790
ENSMUSP00000024734	68463	Mrpl14	Mrpl14	ENSMUSP00000055619	66242	Mrps16	Mrps16	993
ENSMUSP00000024734	68463	Mrpl14	Mrpl14	ENSMUSP00000032124	56284	Mrpl19	Mrpl19	992
ENSMUSP00000024734	68463	Mrpl14	Mrpl14	ENSMUSP00000030365	56280	Mrpl37	Mrpl37	980
ENSMUSP00000024734	68463	Mrpl14	Mrpl14	ENSMUSP00000039951	66047	Mrpl54	Mrpl54	982
ENSMUSP00000024734	68463	Mrpl14	Mrpl14	ENSMUSP00000025014	68611	Mrpl28	Mrpl28	985
ENSMUSP00000024734	68463	Mrpl14	Mrpl14	ENSMUSP00000035177	94062	Mrpl3	Mrpl3	974
ENSMUSP00000024734	68463	Mrpl14	Mrpl14	ENSMUSP00000031978	14548	Mrps33	Mrps33	993
ENSMUSP00000024734	68463	Mrpl14	Mrpl14	ENSMUSP00000078123	67681	Mrpl18	Mrpl18	976
ENSMUSP00000024734	68463	Mrpl14	Mrpl14	ENSMUSP00000045111	79044	Mrps34	Mrps34	972
ENSMUSP00000024734	68463	Mrpl14	Mrpl14	ENSMUSP00000076503	28030	Gfm1	Gfm1	912
ENSMUSP00000024734	68463	Mrpl14	Mrpl14	ENSMUSP00000037783	102060	Gadd45gip1	Gadd45gip1	982
ENSMUSP00000024748	56055	Gtpbp2	Gtpbp2	ENSMUSP00000031320	56744	Pf4	Pf4	900
ENSMUSP00000024748	56055	Gtpbp2	Gtpbp2	ENSMUSP00000071370	66866	Nhlrc2	Nhlrc2	900
ENSMUSP00000024748	56055	Gtpbp2	Gtpbp2	ENSMUSP00000040956	109232	Sccpdh	Sccpdh	900
ENSMUSP00000024748	56055	Gtpbp2	Gtpbp2	ENSMUSP00000107873	22371	Vwf	Vwf	901
ENSMUSP00000024748	56055	Gtpbp2	Gtpbp2	ENSMUSP00000057462	53612	Vti1b	Vti1b	900
ENSMUSP00000024748	56055	Gtpbp2	Gtpbp2	ENSMUSP00000048667	74145	F13a1	F13a1	902
ENSMUSP00000024748	56055	Gtpbp2	Gtpbp2	ENSMUSP00000067708	11472	Actn2	Actn2	902
ENSMUSP00000024763	68565	Mrps18a	Mrps18a	ENSMUSP00000032124	56284	Mrpl19	Mrpl19	984
ENSMUSP00000024763	68565	Mrps18a	Mrps18a	ENSMUSP00000025014	68611	Mrpl28	Mrpl28	996
ENSMUSP00000024763	68565	Mrps18a	Mrps18a	ENSMUSP00000120528	67427	Rps20	Rps20	810
ENSMUSP00000024763	68565	Mrps18a	Mrps18a	ENSMUSP00000078123	67681	Mrpl18	Mrpl18	971
ENSMUSP00000024763	68565	Mrps18a	Mrps18a	ENSMUSP00000045111	79044	Mrps34	Mrps34	986
ENSMUSP00000024763	68565	Mrps18a	Mrps18a	ENSMUSP00000037783	102060	Gadd45gip1	Gadd45gip1	978
ENSMUSP00000024763	68565	Mrps18a	Mrps18a	ENSMUSP00000048348	232536	Mrps35	Mrps35	942
ENSMUSP00000024763	68565	Mrps18a	Mrps18a	ENSMUSP00000055619	66242	Mrps16	Mrps16	990
ENSMUSP00000024763	68565	Mrps18a	Mrps18a	ENSMUSP00000030365	56280	Mrpl37	Mrpl37	984
ENSMUSP00000024763	68565	Mrps18a	Mrps18a	ENSMUSP00000039951	66047	Mrpl54	Mrpl54	992
ENSMUSP00000024763	68565	Mrps18a	Mrps18a	ENSMUSP00000035177	94062	Mrpl3	Mrpl3	983
ENSMUSP00000024763	68565	Mrps18a	Mrps18a	ENSMUSP00000031978	14548	Mrps33	Mrps33	978
ENSMUSP00000024763	68565	Mrps18a	Mrps18a	ENSMUSP00000076503	28030	Gfm1	Gfm1	914
ENSMUSP00000024956	104215	Rhoq	Rhoq	ENSMUSP00000039416	211446	Exoc3	Exoc3	914
ENSMUSP00000024956	104215	Rhoq	Rhoq	ENSMUSP00000081132	269608	Plekhg5	Plekhg5	917
ENSMUSP00000024956	104215	Rhoq	Rhoq	ENSMUSP00000044491	236920	Stard8	Stard8	909
ENSMUSP00000024956	104215	Rhoq	Rhoq	ENSMUSP00000109121	69940	Exoc1	Exoc1	913
ENSMUSP00000024956	104215	Rhoq	Rhoq	ENSMUSP00000126598	69632	Arhgef12	Arhgef12	925
ENSMUSP00000024967	17685	Msh2	Msh2	ENSMUSP00000113928	56317	Anapc7	Anapc7	840
ENSMUSP00000025014	68611	Mrpl28	Mrpl28	ENSMUSP00000048348	232536	Mrps35	Mrps35	731
ENSMUSP00000025014	68611	Mrpl28	Mrpl28	ENSMUSP00000055619	66242	Mrps16	Mrps16	982
ENSMUSP00000025014	68611	Mrpl28	Mrpl28	ENSMUSP00000032124	56284	Mrpl19	Mrpl19	984
ENSMUSP00000025014	68611	Mrpl28	Mrpl28	ENSMUSP00000030365	56280	Mrpl37	Mrpl37	985
ENSMUSP00000025014	68611	Mrpl28	Mrpl28	ENSMUSP00000039951	66047	Mrpl54	Mrpl54	973
ENSMUSP00000025014	68611	Mrpl28	Mrpl28	ENSMUSP00000035177	94062	Mrpl3	Mrpl3	989
ENSMUSP00000025014	68611	Mrpl28	Mrpl28	ENSMUSP00000031978	14548	Mrps33	Mrps33	980
ENSMUSP00000025014	68611	Mrpl28	Mrpl28	ENSMUSP00000078123	67681	Mrpl18	Mrpl18	988
ENSMUSP00000025014	68611	Mrpl28	Mrpl28	ENSMUSP00000045111	79044	Mrps34	Mrps34	982
ENSMUSP00000025014	68611	Mrpl28	Mrpl28	ENSMUSP00000076503	28030	Gfm1	Gfm1	908
ENSMUSP00000025014	68611	Mrpl28	Mrpl28	ENSMUSP00000037783	102060	Gadd45gip1	Gadd45gip1	986
ENSMUSP00000025183	19763	Ring1	Ring1	ENSMUSP00000033720	245688	Rbbp7	Rbbp7	878
ENSMUSP00000025183	19763	Ring1	Ring1	ENSMUSP00000113928	56317	Anapc7	Anapc7	725
ENSMUSP00000025183	19763	Ring1	Ring1	ENSMUSP00000083393	59008	Anapc5	Anapc5	726
ENSMUSP00000025183	19763	Ring1	Ring1	ENSMUSP00000066138	74383	Ubap2l	Ubap2l	725
ENSMUSP00000025183	19763	Ring1	Ring1	ENSMUSP00000031862	629578	Cbx3-ps6	Cbx3-ps6	942
ENSMUSP00000025349	58916	Myot	Myot	ENSMUSP00000037007	80888	Hspb8	Hspb8	740
ENSMUSP00000025349	58916	Myot	Myot	ENSMUSP00000107966	241431	Xirp2	Xirp2	709
ENSMUSP00000025349	58916	Myot	Myot	ENSMUSP00000067708	11472	Actn2	Actn2	716
ENSMUSP00000025505	67665	Dctn4	Dctn4	ENSMUSP00000028977	16569	Kif3b	Kif3b	903
ENSMUSP00000025505	67665	Dctn4	Dctn4	ENSMUSP00000032508	14228	Fkbp4	Fkbp4	902
ENSMUSP00000025505	67665	Dctn4	Dctn4	ENSMUSP00000105304	67068	Dynlrb1	Dynlrb1	811
ENSMUSP00000025505	67665	Dctn4	Dctn4	ENSMUSP00000048041	12509	Cd59a	Cd59a	900
ENSMUSP00000025505	67665	Dctn4	Dctn4	ENSMUSP00000090089	11735	Ank3	Ank3	927
ENSMUSP00000025505	67665	Dctn4	Dctn4	ENSMUSP00000029092	228998	Arfgap1	Arfgap1	902
ENSMUSP00000025523	12978	Csf1r	Csf1r	ENSMUSP00000069851	320404	Itpkb	Itpkb	701
ENSMUSP00000025523	12978	Csf1r	Csf1r	ENSMUSP00000048836	12259	C1qa	C1qa	867
ENSMUSP00000025523	12978	Csf1r	Csf1r	ENSMUSP00000040246	12260	C1qb	C1qb	912
ENSMUSP00000025523	12978	Csf1r	Csf1r	ENSMUSP00000032800	22177	Tyrobp	Tyrobp	953
ENSMUSP00000025547	67105	Timm21	Timm21	ENSMUSP00000080614	66525	Timm50	Timm50	982
ENSMUSP00000026148	12409	Cbr2	Cbr2	ENSMUSP00000028162	96979	Ptges2	Ptges2	908
ENSMUSP00000026196	14718	Got1	Got1	ENSMUSP00000028892	170718	Idh3b	Idh3b	820
ENSMUSP00000026196	14718	Got1	Got1	ENSMUSP00000127526	67834	Idh3a	Idh3a	838
ENSMUSP00000026196	14718	Got1	Got1	ENSMUSP00000103007	269951	Idh2	Idh2	887
ENSMUSP00000026196	14718	Got1	Got1	ENSMUSP00000095316	15926	Idh1	Idh1	883
ENSMUSP00000026196	14718	Got1	Got1	ENSMUSP00000034136	108682	Gpt2	Gpt2	966
ENSMUSP00000026405	14533	Bloc1s1	Bloc1s1	ENSMUSP00000030698	100226	Stx12	Stx12	752
ENSMUSP00000026795	11689	Alox5	Alox5	ENSMUSP00000081011	14778	Gpx3	Gpx3	915
ENSMUSP00000026795	11689	Alox5	Alox5	ENSMUSP00000099569	18784	Pla2g5	Pla2g5	831
ENSMUSP00000027164	105243938	Gm38137	Gm38137	ENSMUSP00000077132	109700	Itga1	Itga1	742
ENSMUSP00000027164	105243938	Gm38137	Gm38137	ENSMUSP00000028348	16420	Itgb6	Itgb6	728
ENSMUSP00000027164	105243938	Gm38137	Gm38137	ENSMUSP00000070726	226849	Ppp2r5a	Ppp2r5a	917
ENSMUSP00000027467	20720	Serpine2	Serpine2	ENSMUSP00000107873	22371	Vwf	Vwf	951
ENSMUSP00000027467	20720	Serpine2	Serpine2	ENSMUSP00000048667	74145	F13a1	F13a1	920
ENSMUSP00000027467	20720	Serpine2	Serpine2	ENSMUSP00000066488	11606	Agt	Agt	747
ENSMUSP00000027478	67273	Ndufa10	Ndufa10	ENSMUSP00000028892	170718	Idh3b	Idh3b	779
ENSMUSP00000027478	67273	Ndufa10	Ndufa10	ENSMUSP00000101003	75406	Ndufs7	Ndufs7	998
ENSMUSP00000027478	67273	Ndufa10	Ndufa10	ENSMUSP00000130532	75597	Ndufaf2	Ndufaf2	937
ENSMUSP00000027478	67273	Ndufa10	Ndufa10	ENSMUSP00000029925	68493	Ndufaf4	Ndufaf4	934
ENSMUSP00000027478	67273	Ndufa10	Ndufa10	ENSMUSP00000033176	67003	Uqcrc2	Uqcrc2	996
ENSMUSP00000027478	67273	Ndufa10	Ndufa10	ENSMUSP00000037341	66916	Ndufb7	Ndufb7	999
ENSMUSP00000027478	67273	Ndufa10	Ndufa10	ENSMUSP00000065113	56451	Suclg1	Suclg1	844
ENSMUSP00000027478	67273	Ndufa10	Ndufa10	ENSMUSP00000137424	26940	Ecsit	Ecsit	932
ENSMUSP00000027505	66262	Ing5	Ing5	ENSMUSP00000109271	81601	Kat5	Kat5	785
ENSMUSP00000027505	66262	Ing5	Ing5	ENSMUSP00000033720	245688	Rbbp7	Rbbp7	931
ENSMUSP00000027505	66262	Ing5	Ing5	ENSMUSP00000060054	107932	Chd4	Chd4	919
ENSMUSP00000027505	66262	Ing5	Ing5	ENSMUSP00000128152	269424	Jade1	Jade1	970
ENSMUSP00000027839	80914	Uck2	Uck2	ENSMUSP00000030491	66588	Cmpk1	Cmpk1	941
ENSMUSP00000028162	96979	Ptges2	Ptges2	ENSMUSP00000099382	18830	Pltp	Pltp	900
ENSMUSP00000028348	16420	Itgb6	Itgb6	ENSMUSP00000028633	14118	Fbn1	Fbn1	909
ENSMUSP00000028348	16420	Itgb6	Itgb6	ENSMUSP00000039633	70549	Tln2	Tln2	784
ENSMUSP00000028348	16420	Itgb6	Itgb6	ENSMUSP00000077132	109700	Itga1	Itga1	926
ENSMUSP00000028348	16420	Itgb6	Itgb6	ENSMUSP00000105663	14083	Ptk2	Ptk2	859
ENSMUSP00000028633	14118	Fbn1	Fbn1	ENSMUSP00000069087	16779	Lamb2	Lamb2	916
ENSMUSP00000028633	14118	Fbn1	Fbn1	ENSMUSP00000028938	13010	Cst3	Cst3	902
ENSMUSP00000028633	14118	Fbn1	Fbn1	ENSMUSP00000048053	22393	Wfs1	Wfs1	900
ENSMUSP00000028633	14118	Fbn1	Fbn1	ENSMUSP00000105173	13003	Vcan	Vcan	976
ENSMUSP00000028633	14118	Fbn1	Fbn1	ENSMUSP00000110987	19089	Prkcsh	Prkcsh	900
ENSMUSP00000028633	14118	Fbn1	Fbn1	ENSMUSP00000031668	12843	Col1a2	Col1a2	922
ENSMUSP00000028633	14118	Fbn1	Fbn1	ENSMUSP00000082459	15464	Hrc	Hrc	900
ENSMUSP00000028668	78655	Eif3j1	Eif3j1	ENSMUSP00000127034	13681	Eif4a1	Eif4a1	945
ENSMUSP00000028668	78655	Eif3j1	Eif3j1	ENSMUSP00000127774	75705	Eif4b	Eif4b	955
ENSMUSP00000028668	78655	Eif3j1	Eif3j1	ENSMUSP00000059395	26905	Eif2s3x	Eif2s3x	927
ENSMUSP00000028892	170718	Idh3b	Idh3b	ENSMUSP00000060346	78920	Dlst	Dlst	744
ENSMUSP00000028892	170718	Idh3b	Idh3b	ENSMUSP00000100038	11428	Aco1	Aco1	953
ENSMUSP00000028892	170718	Idh3b	Idh3b	ENSMUSP00000127526	67834	Idh3a	Idh3a	995
ENSMUSP00000028892	170718	Idh3b	Idh3b	ENSMUSP00000123765	20916	Sucla2	Sucla2	839
ENSMUSP00000028892	170718	Idh3b	Idh3b	ENSMUSP00000103007	269951	Idh2	Idh2	992
ENSMUSP00000028892	170718	Idh3b	Idh3b	ENSMUSP00000065113	56451	Suclg1	Suclg1	929
ENSMUSP00000028892	170718	Idh3b	Idh3b	ENSMUSP00000095316	15926	Idh1	Idh1	985
ENSMUSP00000028892	170718	Idh3b	Idh3b	ENSMUSP00000034136	108682	Gpt2	Gpt2	842
ENSMUSP00000028938	13010	Cst3	Cst3	ENSMUSP00000110987	19089	Prkcsh	Prkcsh	900
ENSMUSP00000028938	13010	Cst3	Cst3	ENSMUSP00000032629	20430	Cyfip1	Cyfip1	901
ENSMUSP00000028938	13010	Cst3	Cst3	ENSMUSP00000069087	16779	Lamb2	Lamb2	902
ENSMUSP00000028938	13010	Cst3	Cst3	ENSMUSP00000095316	15926	Idh1	Idh1	902
ENSMUSP00000028938	13010	Cst3	Cst3	ENSMUSP00000048053	22393	Wfs1	Wfs1	902
ENSMUSP00000028938	13010	Cst3	Cst3	ENSMUSP00000082459	15464	Hrc	Hrc	900
ENSMUSP00000028938	13010	Cst3	Cst3	ENSMUSP00000105173	13003	Vcan	Vcan	901
ENSMUSP00000028977	16569	Kif3b	Kif3b	ENSMUSP00000105304	67068	Dynlrb1	Dynlrb1	908
ENSMUSP00000028977	16569	Kif3b	Kif3b	ENSMUSP00000031426	12589	Ift81	Ift81	958
ENSMUSP00000028977	16569	Kif3b	Kif3b	ENSMUSP00000092075	16562	Kif1c	Kif1c	907
ENSMUSP00000028977	16569	Kif3b	Kif3b	ENSMUSP00000034803	26951	Zw10	Zw10	905
ENSMUSP00000028977	16569	Kif3b	Kif3b	ENSMUSP00000029092	228998	Arfgap1	Arfgap1	903
ENSMUSP00000029082	26444	Psma7	Psma7	ENSMUSP00000115578	22190	Ubc	Ubc	945
ENSMUSP00000029082	26444	Psma7	Psma7	ENSMUSP00000113928	56317	Anapc7	Anapc7	927
ENSMUSP00000029082	26444	Psma7	Psma7	ENSMUSP00000124215	68031	Rnf146	Rnf146	902
ENSMUSP00000029082	26444	Psma7	Psma7	ENSMUSP00000083393	59008	Anapc5	Anapc5	905
ENSMUSP00000029082	26444	Psma7	Psma7	ENSMUSP00000034469	112405	Egln1	Egln1	900
ENSMUSP00000029082	26444	Psma7	Psma7	ENSMUSP00000050076	56436	Adrm1	Adrm1	984
ENSMUSP00000029082	26444	Psma7	Psma7	ENSMUSP00000070726	226849	Ppp2r5a	Ppp2r5a	900
ENSMUSP00000029082	26444	Psma7	Psma7	ENSMUSP00000071589	19185	Psmd4	Psmd4	996
ENSMUSP00000029082	26444	Psma7	Psma7	ENSMUSP00000032824	23996	Psmc4	Psmc4	998
ENSMUSP00000029092	228998	Arfgap1	Arfgap1	ENSMUSP00000048041	12509	Cd59a	Cd59a	900
ENSMUSP00000029092	228998	Arfgap1	Arfgap1	ENSMUSP00000092075	16562	Kif1c	Kif1c	904
ENSMUSP00000029092	228998	Arfgap1	Arfgap1	ENSMUSP00000090089	11735	Ank3	Ank3	909
ENSMUSP00000029158	68295	Aar2	Aar2	ENSMUSP00000123698	66266	Eapp	Eapp	862
ENSMUSP00000029257	76295	Atp11b	Atp11b	ENSMUSP00000113322	19340	Rab3d	Rab3d	900
ENSMUSP00000029257	76295	Atp11b	Atp11b	ENSMUSP00000034878	69981	Tmem30a	Tmem30a	965
ENSMUSP00000029257	76295	Atp11b	Atp11b	ENSMUSP00000048092	12267	C3ar1	C3ar1	900
ENSMUSP00000029257	76295	Atp11b	Atp11b	ENSMUSP00000100862	12512	Cd63	Cd63	902
ENSMUSP00000029266	11747	Anxa5	Anxa5	ENSMUSP00000069851	320404	Itpkb	Itpkb	781
ENSMUSP00000029266	11747	Anxa5	Anxa5	ENSMUSP00000110746	11798	Xiap	Xiap	700
ENSMUSP00000029331	18441	P2ry1	P2ry1	ENSMUSP00000061754	14062	F2r	F2r	912
ENSMUSP00000029331	18441	P2ry1	P2ry1	ENSMUSP00000139347	21333	Tac1	Tac1	932
ENSMUSP00000029331	18441	P2ry1	P2ry1	ENSMUSP00000037255	14816	Grm1	Grm1	917
ENSMUSP00000029331	18441	P2ry1	P2ry1	ENSMUSP00000066488	11606	Agt	Agt	904
ENSMUSP00000029331	18441	P2ry1	P2ry1	ENSMUSP00000063670	574402	Gpr17	Gpr17	908
ENSMUSP00000029331	18441	P2ry1	P2ry1	ENSMUSP00000034029	13617	Ednra	Ednra	908
ENSMUSP00000029353	16649	Kpna4	Kpna4	ENSMUSP00000036093	226432	Ipo9	Ipo9	726
ENSMUSP00000029445	16653	Kras	Kras	ENSMUSP00000069851	320404	Itpkb	Itpkb	702
ENSMUSP00000029445	16653	Kras	Kras	ENSMUSP00000107873	22371	Vwf	Vwf	901
ENSMUSP00000029445	16653	Kras	Kras	ENSMUSP00000115578	22190	Ubc	Ubc	926
ENSMUSP00000029445	16653	Kras	Kras	ENSMUSP00000048041	12509	Cd59a	Cd59a	900
ENSMUSP00000029445	16653	Kras	Kras	ENSMUSP00000099862	21687	Tek	Tek	908
ENSMUSP00000029445	16653	Kras	Kras	ENSMUSP00000064394	16452	Jak2	Jak2	953
ENSMUSP00000029445	16653	Kras	Kras	ENSMUSP00000088174	109905	Rap1a	Rap1a	931
ENSMUSP00000029445	16653	Kras	Kras	ENSMUSP00000070726	226849	Ppp2r5a	Ppp2r5a	907
ENSMUSP00000029445	16653	Kras	Kras	ENSMUSP00000067708	11472	Actn2	Actn2	906
ENSMUSP00000029445	16653	Kras	Kras	ENSMUSP00000105663	14083	Ptk2	Ptk2	920
ENSMUSP00000029445	16653	Kras	Kras	ENSMUSP00000130636	56705	Ranbp9	Ranbp9	912
ENSMUSP00000029445	16653	Kras	Kras	ENSMUSP00000057543	14678	Gnai2	Gnai2	867
ENSMUSP00000029752	71807	Tars2	Tars2	ENSMUSP00000046453	71941	Cars2	Cars2	824
ENSMUSP00000029770	19299	Abcd3	Abcd3	ENSMUSP00000063325	11430	Acox1	Acox1	715
ENSMUSP00000029770	19299	Abcd3	Abcd3	ENSMUSP00000099660	384061	Fndc5	Fndc5	731
ENSMUSP00000029925	68493	Ndufaf4	Ndufaf4	ENSMUSP00000033176	67003	Uqcrc2	Uqcrc2	926
ENSMUSP00000029925	68493	Ndufaf4	Ndufaf4	ENSMUSP00000032844	66271	Tmem126a	Tmem126a	730
ENSMUSP00000029925	68493	Ndufaf4	Ndufaf4	ENSMUSP00000037341	66916	Ndufb7	Ndufb7	915
ENSMUSP00000029925	68493	Ndufaf4	Ndufaf4	ENSMUSP00000101003	75406	Ndufs7	Ndufs7	988
ENSMUSP00000029925	68493	Ndufaf4	Ndufaf4	ENSMUSP00000130532	75597	Ndufaf2	Ndufaf2	986
ENSMUSP00000029925	68493	Ndufaf4	Ndufaf4	ENSMUSP00000137424	26940	Ecsit	Ecsit	982
ENSMUSP00000030127	52076	Tmem38b	Tmem38b	ENSMUSP00000081941	56693	Crtap	Crtap	812
ENSMUSP00000030345	12896	Cpt2	Cpt2	ENSMUSP00000063325	11430	Acox1	Acox1	978
ENSMUSP00000030365	56280	Mrpl37	Mrpl37	ENSMUSP00000048348	232536	Mrps35	Mrps35	708
ENSMUSP00000030365	56280	Mrpl37	Mrpl37	ENSMUSP00000055619	66242	Mrps16	Mrps16	969
ENSMUSP00000030365	56280	Mrpl37	Mrpl37	ENSMUSP00000032124	56284	Mrpl19	Mrpl19	968
ENSMUSP00000030365	56280	Mrpl37	Mrpl37	ENSMUSP00000039951	66047	Mrpl54	Mrpl54	969
ENSMUSP00000030365	56280	Mrpl37	Mrpl37	ENSMUSP00000035177	94062	Mrpl3	Mrpl3	983
ENSMUSP00000030365	56280	Mrpl37	Mrpl37	ENSMUSP00000031978	14548	Mrps33	Mrps33	965
ENSMUSP00000030365	56280	Mrpl37	Mrpl37	ENSMUSP00000078123	67681	Mrpl18	Mrpl18	978
ENSMUSP00000030365	56280	Mrpl37	Mrpl37	ENSMUSP00000045111	79044	Mrps34	Mrps34	920
ENSMUSP00000030365	56280	Mrpl37	Mrpl37	ENSMUSP00000076503	28030	Gfm1	Gfm1	921
ENSMUSP00000030365	56280	Mrpl37	Mrpl37	ENSMUSP00000037783	102060	Gadd45gip1	Gadd45gip1	978
ENSMUSP00000030568	20348	Sema3c	Sema3c	ENSMUSP00000051731	140570	Plxnb2	Plxnb2	768
ENSMUSP00000030698	100226	Stx12	Stx12	ENSMUSP00000093905	209018	Vps8	Vps8	765
ENSMUSP00000030698	100226	Stx12	Stx12	ENSMUSP00000030914	67830	Rer1	Rer1	763
ENSMUSP00000030698	100226	Stx12	Stx12	ENSMUSP00000057462	53612	Vti1b	Vti1b	963
ENSMUSP00000030784	108099	Prkag2	Prkag2	ENSMUSP00000099642	100705	Acacb	Acacb	894
ENSMUSP00000031003	269643	Ppp2r2c	Ppp2r2c	ENSMUSP00000070726	226849	Ppp2r5a	Ppp2r5a	883
ENSMUSP00000031273	74596	Cds1	Cds1	ENSMUSP00000117025	52123	Agpat5	Agpat5	915
ENSMUSP00000031273	74596	Cds1	Cds1	ENSMUSP00000127325	102247	Gpat4	Gpat4	915
ENSMUSP00000031273	74596	Cds1	Cds1	ENSMUSP00000099470	110911	Cds2	Cds2	807
ENSMUSP00000031273	74596	Cds1	Cds1	ENSMUSP00000070583	14245	Lpin1	Lpin1	721
ENSMUSP00000031273	74596	Cds1	Cds1	ENSMUSP00000068690	225010	Lclat1	Lclat1	934
ENSMUSP00000031320	56744	Pf4	Pf4	ENSMUSP00000071370	66866	Nhlrc2	Nhlrc2	900
ENSMUSP00000031320	56744	Pf4	Pf4	ENSMUSP00000048092	12267	C3ar1	C3ar1	913
ENSMUSP00000031320	56744	Pf4	Pf4	ENSMUSP00000085293	13610	S1pr3	S1pr3	907
ENSMUSP00000031320	56744	Pf4	Pf4	ENSMUSP00000040956	109232	Sccpdh	Sccpdh	900
ENSMUSP00000031320	56744	Pf4	Pf4	ENSMUSP00000107873	22371	Vwf	Vwf	965
ENSMUSP00000031320	56744	Pf4	Pf4	ENSMUSP00000063670	574402	Gpr17	Gpr17	900
ENSMUSP00000031320	56744	Pf4	Pf4	ENSMUSP00000072800	20315	Cxcl12	Cxcl12	970
ENSMUSP00000031320	56744	Pf4	Pf4	ENSMUSP00000048667	74145	F13a1	F13a1	943
ENSMUSP00000031320	56744	Pf4	Pf4	ENSMUSP00000066488	11606	Agt	Agt	905
ENSMUSP00000031320	56744	Pf4	Pf4	ENSMUSP00000057462	53612	Vti1b	Vti1b	900
ENSMUSP00000031320	56744	Pf4	Pf4	ENSMUSP00000057543	14678	Gnai2	Gnai2	901
ENSMUSP00000031320	56744	Pf4	Pf4	ENSMUSP00000067708	11472	Actn2	Actn2	900
ENSMUSP00000031377	12492	Scarb2	Scarb2	ENSMUSP00000115578	22190	Ubc	Ubc	900
ENSMUSP00000031377	12492	Scarb2	Scarb2	ENSMUSP00000108075	58194	Sh3kbp1	Sh3kbp1	900
ENSMUSP00000031377	12492	Scarb2	Scarb2	ENSMUSP00000100862	12512	Cd63	Cd63	876
ENSMUSP00000031377	12492	Scarb2	Scarb2	ENSMUSP00000056888	54609	Ubqln2	Ubqln2	900
ENSMUSP00000031377	12492	Scarb2	Scarb2	ENSMUSP00000130660	14466	Gba	Gba	873
ENSMUSP00000031377	12492	Scarb2	Scarb2	ENSMUSP00000104864	170625	Snx18	Snx18	902
ENSMUSP00000031426	12589	Ift81	Ift81	ENSMUSP00000105304	67068	Dynlrb1	Dynlrb1	909
ENSMUSP00000031640	264064	Cdk8	Cdk8	ENSMUSP00000050771	20020	Polr2a	Polr2a	835
ENSMUSP00000031640	264064	Cdk8	Cdk8	ENSMUSP00000085416	17979	Ncoa3	Ncoa3	905
ENSMUSP00000031640	264064	Cdk8	Cdk8	ENSMUSP00000068974	20185	Ncor1	Ncor1	916
ENSMUSP00000031668	12843	Col1a2	Col1a2	ENSMUSP00000108553	12830	Col4a5	Col4a5	943
ENSMUSP00000031668	12843	Col1a2	Col1a2	ENSMUSP00000081941	56693	Crtap	Crtap	973
ENSMUSP00000031668	12843	Col1a2	Col1a2	ENSMUSP00000077132	109700	Itga1	Itga1	710
ENSMUSP00000031841	101214	Tra2a	Tra2a	ENSMUSP00000085993	75956	Srrm2	Srrm2	758
ENSMUSP00000031841	101214	Tra2a	Tra2a	ENSMUSP00000110103	53379	Hnrnpa2b1	Hnrnpa2b1	752
ENSMUSP00000031862	629578	Cbx3-ps6	Cbx3-ps6	ENSMUSP00000045816	50708	H1f2	H1f2	713
ENSMUSP00000031862	629578	Cbx3-ps6	Cbx3-ps6	ENSMUSP00000110103	53379	Hnrnpa2b1	Hnrnpa2b1	753
ENSMUSP00000031862	629578	Cbx3-ps6	Cbx3-ps6	ENSMUSP00000074310	319169	H2ac15	H2ac15	926
ENSMUSP00000031978	14548	Mrps33	Mrps33	ENSMUSP00000048348	232536	Mrps35	Mrps35	969
ENSMUSP00000031978	14548	Mrps33	Mrps33	ENSMUSP00000055619	66242	Mrps16	Mrps16	983
ENSMUSP00000031978	14548	Mrps33	Mrps33	ENSMUSP00000032124	56284	Mrpl19	Mrpl19	976
ENSMUSP00000031978	14548	Mrps33	Mrps33	ENSMUSP00000039951	66047	Mrpl54	Mrpl54	989
ENSMUSP00000031978	14548	Mrps33	Mrps33	ENSMUSP00000035177	94062	Mrpl3	Mrpl3	974
ENSMUSP00000031978	14548	Mrps33	Mrps33	ENSMUSP00000078123	67681	Mrpl18	Mrpl18	981
ENSMUSP00000031978	14548	Mrps33	Mrps33	ENSMUSP00000045111	79044	Mrps34	Mrps34	981
ENSMUSP00000031978	14548	Mrps33	Mrps33	ENSMUSP00000076503	28030	Gfm1	Gfm1	903
ENSMUSP00000031978	14548	Mrps33	Mrps33	ENSMUSP00000037783	102060	Gadd45gip1	Gadd45gip1	974
ENSMUSP00000032124	56284	Mrpl19	Mrpl19	ENSMUSP00000080854	100503670	Rpl5	Rpl5	893
ENSMUSP00000032124	56284	Mrpl19	Mrpl19	ENSMUSP00000120528	67427	Rps20	Rps20	871
ENSMUSP00000032124	56284	Mrpl19	Mrpl19	ENSMUSP00000078123	67681	Mrpl18	Mrpl18	981
ENSMUSP00000032124	56284	Mrpl19	Mrpl19	ENSMUSP00000045111	79044	Mrps34	Mrps34	970
ENSMUSP00000032124	56284	Mrpl19	Mrpl19	ENSMUSP00000037783	102060	Gadd45gip1	Gadd45gip1	973
ENSMUSP00000032124	56284	Mrpl19	Mrpl19	ENSMUSP00000048348	232536	Mrps35	Mrps35	825
ENSMUSP00000032124	56284	Mrpl19	Mrpl19	ENSMUSP00000055619	66242	Mrps16	Mrps16	996
ENSMUSP00000032124	56284	Mrpl19	Mrpl19	ENSMUSP00000039951	66047	Mrpl54	Mrpl54	985
ENSMUSP00000032124	56284	Mrpl19	Mrpl19	ENSMUSP00000034966	67891	Rpl4	Rpl4	824
ENSMUSP00000032124	56284	Mrpl19	Mrpl19	ENSMUSP00000078654	319195	Rpl17	Rpl17	736
ENSMUSP00000032124	56284	Mrpl19	Mrpl19	ENSMUSP00000035177	94062	Mrpl3	Mrpl3	994
ENSMUSP00000032124	56284	Mrpl19	Mrpl19	ENSMUSP00000106336	100101806	Srp54c	Srp54c	755
ENSMUSP00000032124	56284	Mrpl19	Mrpl19	ENSMUSP00000076503	28030	Gfm1	Gfm1	966
ENSMUSP00000032508	14228	Fkbp4	Fkbp4	ENSMUSP00000085416	17979	Ncoa3	Ncoa3	715
ENSMUSP00000032629	20430	Cyfip1	Cyfip1	ENSMUSP00000105663	14083	Ptk2	Ptk2	925
ENSMUSP00000032629	20430	Cyfip1	Cyfip1	ENSMUSP00000120240	330319	Wipf3	Wipf3	935
ENSMUSP00000032629	20430	Cyfip1	Cyfip1	ENSMUSP00000095316	15926	Idh1	Idh1	902
ENSMUSP00000032629	20430	Cyfip1	Cyfip1	ENSMUSP00000072334	140580	Elmo1	Elmo1	912
ENSMUSP00000032800	22177	Tyrobp	Tyrobp	ENSMUSP00000048836	12259	C1qa	C1qa	876
ENSMUSP00000032800	22177	Tyrobp	Tyrobp	ENSMUSP00000080159	15015	H2-Q4	H2-Q4	903
ENSMUSP00000032800	22177	Tyrobp	Tyrobp	ENSMUSP00000040246	12260	C1qb	C1qb	861
ENSMUSP00000032824	23996	Psmc4	Psmc4	ENSMUSP00000115578	22190	Ubc	Ubc	982
ENSMUSP00000032824	23996	Psmc4	Psmc4	ENSMUSP00000113928	56317	Anapc7	Anapc7	901
ENSMUSP00000032824	23996	Psmc4	Psmc4	ENSMUSP00000124215	68031	Rnf146	Rnf146	902
ENSMUSP00000032824	23996	Psmc4	Psmc4	ENSMUSP00000083393	59008	Anapc5	Anapc5	945
ENSMUSP00000032824	23996	Psmc4	Psmc4	ENSMUSP00000034469	112405	Egln1	Egln1	902
ENSMUSP00000032824	23996	Psmc4	Psmc4	ENSMUSP00000050076	56436	Adrm1	Adrm1	995
ENSMUSP00000032824	23996	Psmc4	Psmc4	ENSMUSP00000070726	226849	Ppp2r5a	Ppp2r5a	902
ENSMUSP00000032824	23996	Psmc4	Psmc4	ENSMUSP00000080854	100503670	Rpl5	Rpl5	780
ENSMUSP00000032824	23996	Psmc4	Psmc4	ENSMUSP00000056888	54609	Ubqln2	Ubqln2	736
ENSMUSP00000032824	23996	Psmc4	Psmc4	ENSMUSP00000071589	19185	Psmd4	Psmd4	999
ENSMUSP00000032856	109264	Me3	Me3	ENSMUSP00000068086	52815	Ldhd	Ldhd	911
ENSMUSP00000032898	70572	Ipo5	Ipo5	ENSMUSP00000036093	226432	Ipo9	Ipo9	953
ENSMUSP00000032898	70572	Ipo5	Ipo5	ENSMUSP00000046759	320727	Ipo8	Ipo8	901
ENSMUSP00000032898	70572	Ipo5	Ipo5	ENSMUSP00000079667	76582	Ipo11	Ipo11	863
ENSMUSP00000032898	70572	Ipo5	Ipo5	ENSMUSP00000035989	230673	Ipo13	Ipo13	741
ENSMUSP00000033098	12036	Bcat2	Bcat2	ENSMUSP00000071292	12039	Bckdha	Bckdha	982
ENSMUSP00000033123	20927	Abcc8	Abcc8	ENSMUSP00000099984	103988	Gck	Gck	720
ENSMUSP00000033160	74105	Gga2	Gga2	ENSMUSP00000058613	20660	Sorl1	Sorl1	781
ENSMUSP00000033176	67003	Uqcrc2	Uqcrc2	ENSMUSP00000101003	75406	Ndufs7	Ndufs7	993
ENSMUSP00000033176	67003	Uqcrc2	Uqcrc2	ENSMUSP00000096193	12865	Cox7a1	Cox7a1	727
ENSMUSP00000033176	67003	Uqcrc2	Uqcrc2	ENSMUSP00000130532	75597	Ndufaf2	Ndufaf2	906
ENSMUSP00000033176	67003	Uqcrc2	Uqcrc2	ENSMUSP00000080993	17721	ND5	ND5	996
ENSMUSP00000033176	67003	Uqcrc2	Uqcrc2	ENSMUSP00000037341	66916	Ndufb7	Ndufb7	984
ENSMUSP00000033176	67003	Uqcrc2	Uqcrc2	ENSMUSP00000065113	56451	Suclg1	Suclg1	891
ENSMUSP00000033683	20102	Rps4x	Rps4x	ENSMUSP00000125806	110954	Rpl10	Rpl10	915
ENSMUSP00000033683	20102	Rps4x	Rps4x	ENSMUSP00000080854	100503670	Rpl5	Rpl5	980
ENSMUSP00000033683	20102	Rps4x	Rps4x	ENSMUSP00000042457	13627	Eef1a1	Eef1a1	948
ENSMUSP00000033683	20102	Rps4x	Rps4x	ENSMUSP00000120528	67427	Rps20	Rps20	997
ENSMUSP00000033683	20102	Rps4x	Rps4x	ENSMUSP00000059395	26905	Eif2s3x	Eif2s3x	853
ENSMUSP00000033683	20102	Rps4x	Rps4x	ENSMUSP00000034966	67891	Rpl4	Rpl4	977
ENSMUSP00000033683	20102	Rps4x	Rps4x	ENSMUSP00000106519	22070	Tpt1	Tpt1	756
ENSMUSP00000033683	20102	Rps4x	Rps4x	ENSMUSP00000078654	319195	Rpl17	Rpl17	981
ENSMUSP00000033683	20102	Rps4x	Rps4x	ENSMUSP00000035177	94062	Mrpl3	Mrpl3	702
ENSMUSP00000033683	20102	Rps4x	Rps4x	ENSMUSP00000106336	100101806	Srp54c	Srp54c	719
ENSMUSP00000033720	245688	Rbbp7	Rbbp7	ENSMUSP00000060054	107932	Chd4	Chd4	994
ENSMUSP00000033720	245688	Rbbp7	Rbbp7	ENSMUSP00000050771	20020	Polr2a	Polr2a	904
ENSMUSP00000033720	245688	Rbbp7	Rbbp7	ENSMUSP00000096728	16658	Mafb	Mafb	900
ENSMUSP00000033720	245688	Rbbp7	Rbbp7	ENSMUSP00000085416	17979	Ncoa3	Ncoa3	912
ENSMUSP00000033720	245688	Rbbp7	Rbbp7	ENSMUSP00000047208	102323	Dcun1d2	Dcun1d2	902
ENSMUSP00000033720	245688	Rbbp7	Rbbp7	ENSMUSP00000066138	74383	Ubap2l	Ubap2l	737
ENSMUSP00000033720	245688	Rbbp7	Rbbp7	ENSMUSP00000109585	140858	Wdr5	Wdr5	942
ENSMUSP00000033720	245688	Rbbp7	Rbbp7	ENSMUSP00000117153	67733	Itgb3bp	Itgb3bp	920
ENSMUSP00000033720	245688	Rbbp7	Rbbp7	ENSMUSP00000101307	68703	Rere	Rere	774
ENSMUSP00000033720	245688	Rbbp7	Rbbp7	ENSMUSP00000113157	12419	Cbx5	Cbx5	823
ENSMUSP00000033720	245688	Rbbp7	Rbbp7	ENSMUSP00000074310	319169	H2ac15	H2ac15	931
ENSMUSP00000033720	245688	Rbbp7	Rbbp7	ENSMUSP00000068974	20185	Ncor1	Ncor1	955
ENSMUSP00000033775	17524	Mpp1	Mpp1	ENSMUSP00000081557	73750	Whrn	Whrn	756
ENSMUSP00000033938	18970	Polb	Polb	ENSMUSP00000137421	102633237	Gm31114	Gm31114	770
ENSMUSP00000034029	13617	Ednra	Ednra	ENSMUSP00000061754	14062	F2r	F2r	917
ENSMUSP00000034029	13617	Ednra	Ednra	ENSMUSP00000139347	21333	Tac1	Tac1	913
ENSMUSP00000034029	13617	Ednra	Ednra	ENSMUSP00000063670	574402	Gpr17	Gpr17	902
ENSMUSP00000034029	13617	Ednra	Ednra	ENSMUSP00000037255	14816	Grm1	Grm1	904
ENSMUSP00000034029	13617	Ednra	Ednra	ENSMUSP00000066488	11606	Agt	Agt	960
ENSMUSP00000034053	53318	Pdlim3	Pdlim3	ENSMUSP00000127070	17868	Mybpc3	Mybpc3	781
ENSMUSP00000034053	53318	Pdlim3	Pdlim3	ENSMUSP00000067708	11472	Actn2	Actn2	706
ENSMUSP00000034136	108682	Gpt2	Gpt2	ENSMUSP00000127526	67834	Idh3a	Idh3a	830
ENSMUSP00000034136	108682	Gpt2	Gpt2	ENSMUSP00000095316	15926	Idh1	Idh1	843
ENSMUSP00000034136	108682	Gpt2	Gpt2	ENSMUSP00000103007	269951	Idh2	Idh2	854
ENSMUSP00000034138	56445	Dnaja2	Dnaja2	ENSMUSP00000076336	18415	Hspa4l	Hspa4l	768
ENSMUSP00000034234	67914	Coq9	Coq9	ENSMUSP00000048001	52064	Coq5	Coq5	945
ENSMUSP00000034469	112405	Egln1	Egln1	ENSMUSP00000115578	22190	Ubc	Ubc	910
ENSMUSP00000034469	112405	Egln1	Egln1	ENSMUSP00000071589	19185	Psmd4	Psmd4	900
ENSMUSP00000034508	53376	Usp2	Usp2	ENSMUSP00000115578	22190	Ubc	Ubc	979
ENSMUSP00000034508	53376	Usp2	Usp2	ENSMUSP00000072155	72607	Usp13	Usp13	740
ENSMUSP00000034508	53376	Usp2	Usp2	ENSMUSP00000110746	11798	Xiap	Xiap	908
ENSMUSP00000034529	75717	Cul5	Cul5	ENSMUSP00000060124	14794	Spsb2	Spsb2	954
ENSMUSP00000034529	75717	Cul5	Cul5	ENSMUSP00000034740	17999	Nedd4	Nedd4	954
ENSMUSP00000034529	75717	Cul5	Cul5	ENSMUSP00000115578	22190	Ubc	Ubc	926
ENSMUSP00000034529	75717	Cul5	Cul5	ENSMUSP00000113928	56317	Anapc7	Anapc7	902
ENSMUSP00000034529	75717	Cul5	Cul5	ENSMUSP00000083393	59008	Anapc5	Anapc5	920
ENSMUSP00000034529	75717	Cul5	Cul5	ENSMUSP00000125745	84585	Rnf123	Rnf123	910
ENSMUSP00000034529	75717	Cul5	Cul5	ENSMUSP00000047208	102323	Dcun1d2	Dcun1d2	959
ENSMUSP00000034529	75717	Cul5	Cul5	ENSMUSP00000038591	56468	Socs5	Socs5	987
ENSMUSP00000034529	75717	Cul5	Cul5	ENSMUSP00000040025	73998	Herc3	Herc3	913
ENSMUSP00000034529	75717	Cul5	Cul5	ENSMUSP00000136449	207304	Hectd1	Hectd1	920
ENSMUSP00000034529	75717	Cul5	Cul5	ENSMUSP00000049528	19647	Rbbp6	Rbbp6	904
ENSMUSP00000034529	75717	Cul5	Cul5	ENSMUSP00000087810	142687	Asb14	Asb14	916
ENSMUSP00000034529	75717	Cul5	Cul5	ENSMUSP00000100058	22214	Ube2h	Ube2h	908
ENSMUSP00000034529	75717	Cul5	Cul5	ENSMUSP00000058233	269529	Fbxo10	Fbxo10	906
ENSMUSP00000034567	235339	Dlat	Dlat	ENSMUSP00000060346	78920	Dlst	Dlst	989
ENSMUSP00000034567	235339	Dlat	Dlat	ENSMUSP00000127526	67834	Idh3a	Idh3a	765
ENSMUSP00000034567	235339	Dlat	Dlat	ENSMUSP00000123765	20916	Sucla2	Sucla2	953
ENSMUSP00000034567	235339	Dlat	Dlat	ENSMUSP00000092821	382051	Pdp2	Pdp2	963
ENSMUSP00000034567	235339	Dlat	Dlat	ENSMUSP00000099642	100705	Acacb	Acacb	921
ENSMUSP00000034567	235339	Dlat	Dlat	ENSMUSP00000071292	12039	Bckdha	Bckdha	977
ENSMUSP00000034567	235339	Dlat	Dlat	ENSMUSP00000065113	56451	Suclg1	Suclg1	972
ENSMUSP00000034567	235339	Dlat	Dlat	ENSMUSP00000046639	319518	Pdpr	Pdpr	919
ENSMUSP00000034740	17999	Nedd4	Nedd4	ENSMUSP00000060124	14794	Spsb2	Spsb2	900
ENSMUSP00000034740	17999	Nedd4	Nedd4	ENSMUSP00000115578	22190	Ubc	Ubc	981
ENSMUSP00000034740	17999	Nedd4	Nedd4	ENSMUSP00000113928	56317	Anapc7	Anapc7	912
ENSMUSP00000034740	17999	Nedd4	Nedd4	ENSMUSP00000083393	59008	Anapc5	Anapc5	900
ENSMUSP00000034740	17999	Nedd4	Nedd4	ENSMUSP00000125745	84585	Rnf123	Rnf123	912
ENSMUSP00000034740	17999	Nedd4	Nedd4	ENSMUSP00000040025	73998	Herc3	Herc3	910
ENSMUSP00000034740	17999	Nedd4	Nedd4	ENSMUSP00000136449	207304	Hectd1	Hectd1	911
ENSMUSP00000034740	17999	Nedd4	Nedd4	ENSMUSP00000049528	19647	Rbbp6	Rbbp6	904
ENSMUSP00000034740	17999	Nedd4	Nedd4	ENSMUSP00000087810	142687	Asb14	Asb14	904
ENSMUSP00000034740	17999	Nedd4	Nedd4	ENSMUSP00000100058	22214	Ube2h	Ube2h	927
ENSMUSP00000034740	17999	Nedd4	Nedd4	ENSMUSP00000058233	269529	Fbxo10	Fbxo10	901
ENSMUSP00000034803	26951	Zw10	Zw10	ENSMUSP00000117153	67733	Itgb3bp	Itgb3bp	928
ENSMUSP00000034803	26951	Zw10	Zw10	ENSMUSP00000070726	226849	Ppp2r5a	Ppp2r5a	902
ENSMUSP00000034803	26951	Zw10	Zw10	ENSMUSP00000092075	16562	Kif1c	Kif1c	929
ENSMUSP00000034803	26951	Zw10	Zw10	ENSMUSP00000107192	56430	Clip1	Clip1	948
ENSMUSP00000034878	69981	Tmem30a	Tmem30a	ENSMUSP00000048092	12267	C3ar1	C3ar1	900
ENSMUSP00000034878	69981	Tmem30a	Tmem30a	ENSMUSP00000100862	12512	Cd63	Cd63	909
ENSMUSP00000034878	69981	Tmem30a	Tmem30a	ENSMUSP00000048041	12509	Cd59a	Cd59a	900
ENSMUSP00000034878	69981	Tmem30a	Tmem30a	ENSMUSP00000113322	19340	Rab3d	Rab3d	900
ENSMUSP00000034878	69981	Tmem30a	Tmem30a	ENSMUSP00000088174	109905	Rap1a	Rap1a	942
ENSMUSP00000034966	67891	Rpl4	Rpl4	ENSMUSP00000038964	100043257	Rbm3-ps	Rbm3-ps	743
ENSMUSP00000034966	67891	Rpl4	Rpl4	ENSMUSP00000055619	66242	Mrps16	Mrps16	837
ENSMUSP00000034966	67891	Rpl4	Rpl4	ENSMUSP00000078654	319195	Rpl17	Rpl17	986
ENSMUSP00000034966	67891	Rpl4	Rpl4	ENSMUSP00000035177	94062	Mrpl3	Mrpl3	731
ENSMUSP00000034966	67891	Rpl4	Rpl4	ENSMUSP00000125806	110954	Rpl10	Rpl10	987
ENSMUSP00000034966	67891	Rpl4	Rpl4	ENSMUSP00000080854	100503670	Rpl5	Rpl5	999
ENSMUSP00000034966	67891	Rpl4	Rpl4	ENSMUSP00000042457	13627	Eef1a1	Eef1a1	961
ENSMUSP00000034966	67891	Rpl4	Rpl4	ENSMUSP00000120528	67427	Rps20	Rps20	989
ENSMUSP00000034966	67891	Rpl4	Rpl4	ENSMUSP00000059395	26905	Eif2s3x	Eif2s3x	841
ENSMUSP00000034966	67891	Rpl4	Rpl4	ENSMUSP00000106519	22070	Tpt1	Tpt1	808
ENSMUSP00000034981	24127	Xrn1	Xrn1	ENSMUSP00000121239	104625	Cnot6	Cnot6	728
ENSMUSP00000034981	24127	Xrn1	Xrn1	ENSMUSP00000100862	12512	Cd63	Cd63	710
ENSMUSP00000034981	24127	Xrn1	Xrn1	ENSMUSP00000089045	218343	Ttc37	Ttc37	728
ENSMUSP00000034992	23959	Nt5e	Nt5e	ENSMUSP00000110489	21838	Thy1	Thy1	913
ENSMUSP00000035177	94062	Mrpl3	Mrpl3	ENSMUSP00000080854	100503670	Rpl5	Rpl5	870
ENSMUSP00000035177	94062	Mrpl3	Mrpl3	ENSMUSP00000120528	67427	Rps20	Rps20	833
ENSMUSP00000035177	94062	Mrpl3	Mrpl3	ENSMUSP00000078123	67681	Mrpl18	Mrpl18	981
ENSMUSP00000035177	94062	Mrpl3	Mrpl3	ENSMUSP00000045111	79044	Mrps34	Mrps34	967
ENSMUSP00000035177	94062	Mrpl3	Mrpl3	ENSMUSP00000037783	102060	Gadd45gip1	Gadd45gip1	973
ENSMUSP00000035177	94062	Mrpl3	Mrpl3	ENSMUSP00000048348	232536	Mrps35	Mrps35	824
ENSMUSP00000035177	94062	Mrpl3	Mrpl3	ENSMUSP00000055619	66242	Mrps16	Mrps16	989
ENSMUSP00000035177	94062	Mrpl3	Mrpl3	ENSMUSP00000039951	66047	Mrpl54	Mrpl54	971
ENSMUSP00000035177	94062	Mrpl3	Mrpl3	ENSMUSP00000076503	28030	Gfm1	Gfm1	980
ENSMUSP00000035468	171171	Ntng2	Ntng2	ENSMUSP00000091692	14276	Folr2	Folr2	900
ENSMUSP00000035468	171171	Ntng2	Ntng2	ENSMUSP00000110489	21838	Thy1	Thy1	902
ENSMUSP00000035468	171171	Ntng2	Ntng2	ENSMUSP00000113493	109979	Art3	Art3	900
ENSMUSP00000035468	171171	Ntng2	Ntng2	ENSMUSP00000126529	74762	Mdga1	Mdga1	912
ENSMUSP00000035989	230673	Ipo13	Ipo13	ENSMUSP00000036093	226432	Ipo9	Ipo9	890
ENSMUSP00000035989	230673	Ipo13	Ipo13	ENSMUSP00000046759	320727	Ipo8	Ipo8	773
ENSMUSP00000035989	230673	Ipo13	Ipo13	ENSMUSP00000079667	76582	Ipo11	Ipo11	849
ENSMUSP00000036093	226432	Ipo9	Ipo9	ENSMUSP00000046759	320727	Ipo8	Ipo8	938
ENSMUSP00000036477	320609	Strip2	Strip2	ENSMUSP00000076751	80281	Cttnbp2nl	Cttnbp2nl	917
ENSMUSP00000036477	320609	Strip2	Strip2	ENSMUSP00000120830	268980	Strn	Strn	941
ENSMUSP00000037255	14816	Grm1	Grm1	ENSMUSP00000061754	14062	F2r	F2r	904
ENSMUSP00000037255	14816	Grm1	Grm1	ENSMUSP00000139347	21333	Tac1	Tac1	922
ENSMUSP00000037255	14816	Grm1	Grm1	ENSMUSP00000063670	574402	Gpr17	Gpr17	906
ENSMUSP00000037255	14816	Grm1	Grm1	ENSMUSP00000066488	11606	Agt	Agt	906
ENSMUSP00000037255	14816	Grm1	Grm1	ENSMUSP00000057543	14678	Gnai2	Gnai2	836
ENSMUSP00000037268	232989	Hnrnpul1	Hnrnpul1	ENSMUSP00000110103	53379	Hnrnpa2b1	Hnrnpa2b1	936
ENSMUSP00000037268	232989	Hnrnpul1	Hnrnpul1	ENSMUSP00000078469	27967	Cherp	Cherp	908
ENSMUSP00000037268	232989	Hnrnpul1	Hnrnpul1	ENSMUSP00000112213	60321	Wbp11	Wbp11	902
ENSMUSP00000037268	232989	Hnrnpul1	Hnrnpul1	ENSMUSP00000085993	75956	Srrm2	Srrm2	914
ENSMUSP00000037268	232989	Hnrnpul1	Hnrnpul1	ENSMUSP00000125590	231889	Bud31	Bud31	900
ENSMUSP00000037268	232989	Hnrnpul1	Hnrnpul1	ENSMUSP00000043123	83701	Srrt	Srrt	917
ENSMUSP00000037268	232989	Hnrnpul1	Hnrnpul1	ENSMUSP00000107595	545592	Gm11847	Gm11847	940
ENSMUSP00000037268	232989	Hnrnpul1	Hnrnpul1	ENSMUSP00000136858	28000	Prpf19	Prpf19	912
ENSMUSP00000037341	66916	Ndufb7	Ndufb7	ENSMUSP00000101003	75406	Ndufs7	Ndufs7	999
ENSMUSP00000037341	66916	Ndufb7	Ndufb7	ENSMUSP00000096193	12865	Cox7a1	Cox7a1	839
ENSMUSP00000037341	66916	Ndufb7	Ndufb7	ENSMUSP00000130532	75597	Ndufaf2	Ndufaf2	908
ENSMUSP00000037341	66916	Ndufb7	Ndufb7	ENSMUSP00000045111	79044	Mrps34	Mrps34	839
ENSMUSP00000037341	66916	Ndufb7	Ndufb7	ENSMUSP00000037783	102060	Gadd45gip1	Gadd45gip1	701
ENSMUSP00000037341	66916	Ndufb7	Ndufb7	ENSMUSP00000080993	17721	ND5	ND5	746
ENSMUSP00000037341	66916	Ndufb7	Ndufb7	ENSMUSP00000136273	22335	Vdac3	Vdac3	713
ENSMUSP00000037341	66916	Ndufb7	Ndufb7	ENSMUSP00000137424	26940	Ecsit	Ecsit	982
ENSMUSP00000037783	102060	Gadd45gip1	Gadd45gip1	ENSMUSP00000048348	232536	Mrps35	Mrps35	744
ENSMUSP00000037783	102060	Gadd45gip1	Gadd45gip1	ENSMUSP00000055619	66242	Mrps16	Mrps16	968
ENSMUSP00000037783	102060	Gadd45gip1	Gadd45gip1	ENSMUSP00000039951	66047	Mrpl54	Mrpl54	972
ENSMUSP00000037783	102060	Gadd45gip1	Gadd45gip1	ENSMUSP00000078123	67681	Mrpl18	Mrpl18	980
ENSMUSP00000037783	102060	Gadd45gip1	Gadd45gip1	ENSMUSP00000045111	79044	Mrps34	Mrps34	991
ENSMUSP00000037783	102060	Gadd45gip1	Gadd45gip1	ENSMUSP00000076503	28030	Gfm1	Gfm1	902
ENSMUSP00000037970	140780	Bmp2k	Bmp2k	ENSMUSP00000099475	67300	Cltc	Cltc	738
ENSMUSP00000038591	56468	Socs5	Socs5	ENSMUSP00000060124	14794	Spsb2	Spsb2	904
ENSMUSP00000038591	56468	Socs5	Socs5	ENSMUSP00000087810	142687	Asb14	Asb14	900
ENSMUSP00000038591	56468	Socs5	Socs5	ENSMUSP00000064394	16452	Jak2	Jak2	983
ENSMUSP00000038591	56468	Socs5	Socs5	ENSMUSP00000047208	102323	Dcun1d2	Dcun1d2	901
ENSMUSP00000038591	56468	Socs5	Socs5	ENSMUSP00000102981	20851	Stat5b	Stat5b	825
ENSMUSP00000038591	56468	Socs5	Socs5	ENSMUSP00000058233	269529	Fbxo10	Fbxo10	903
ENSMUSP00000038749	54611	Pde3a	Pde3a	ENSMUSP00000093939	11512	Adcy6	Adcy6	761
ENSMUSP00000038749	54611	Pde3a	Pde3a	ENSMUSP00000110563	224129	Adcy5	Adcy5	757
ENSMUSP00000039416	211446	Exoc3	Exoc3	ENSMUSP00000054634	12540	Cdc42	Cdc42	704
ENSMUSP00000039416	211446	Exoc3	Exoc3	ENSMUSP00000109121	69940	Exoc1	Exoc1	999
ENSMUSP00000039633	70549	Tln2	Tln2	ENSMUSP00000077132	109700	Itga1	Itga1	705
ENSMUSP00000039633	70549	Tln2	Tln2	ENSMUSP00000068895	12334	Capn2	Capn2	861
ENSMUSP00000039951	66047	Mrpl54	Mrpl54	ENSMUSP00000048348	232536	Mrps35	Mrps35	898
ENSMUSP00000039951	66047	Mrpl54	Mrpl54	ENSMUSP00000055619	66242	Mrps16	Mrps16	988
ENSMUSP00000039951	66047	Mrpl54	Mrpl54	ENSMUSP00000078123	67681	Mrpl18	Mrpl18	973
ENSMUSP00000039951	66047	Mrpl54	Mrpl54	ENSMUSP00000045111	79044	Mrps34	Mrps34	922
ENSMUSP00000039951	66047	Mrpl54	Mrpl54	ENSMUSP00000076503	28030	Gfm1	Gfm1	902
ENSMUSP00000040025	73998	Herc3	Herc3	ENSMUSP00000060124	14794	Spsb2	Spsb2	900
ENSMUSP00000040025	73998	Herc3	Herc3	ENSMUSP00000115578	22190	Ubc	Ubc	920
ENSMUSP00000040025	73998	Herc3	Herc3	ENSMUSP00000113928	56317	Anapc7	Anapc7	918
ENSMUSP00000040025	73998	Herc3	Herc3	ENSMUSP00000083393	59008	Anapc5	Anapc5	902
ENSMUSP00000040025	73998	Herc3	Herc3	ENSMUSP00000125745	84585	Rnf123	Rnf123	908
ENSMUSP00000040025	73998	Herc3	Herc3	ENSMUSP00000136449	207304	Hectd1	Hectd1	903
ENSMUSP00000040025	73998	Herc3	Herc3	ENSMUSP00000049528	19647	Rbbp6	Rbbp6	904
ENSMUSP00000040025	73998	Herc3	Herc3	ENSMUSP00000087810	142687	Asb14	Asb14	905
ENSMUSP00000040025	73998	Herc3	Herc3	ENSMUSP00000100058	22214	Ube2h	Ube2h	913
ENSMUSP00000040025	73998	Herc3	Herc3	ENSMUSP00000058233	269529	Fbxo10	Fbxo10	901
ENSMUSP00000040246	12260	C1qb	C1qb	ENSMUSP00000048092	12267	C3ar1	C3ar1	823
ENSMUSP00000040246	12260	C1qb	C1qb	ENSMUSP00000048836	12259	C1qa	C1qa	999
ENSMUSP00000040246	12260	C1qb	C1qb	ENSMUSP00000107607	12628	Cfh	Cfh	706
ENSMUSP00000040246	12260	C1qb	C1qb	ENSMUSP00000139376	667277	C1rb	C1rb	968
ENSMUSP00000040852	69544	Wdr5b	Wdr5b	ENSMUSP00000109585	140858	Wdr5	Wdr5	802
ENSMUSP00000040956	109232	Sccpdh	Sccpdh	ENSMUSP00000071370	66866	Nhlrc2	Nhlrc2	900
ENSMUSP00000040956	109232	Sccpdh	Sccpdh	ENSMUSP00000107873	22371	Vwf	Vwf	900
ENSMUSP00000040956	109232	Sccpdh	Sccpdh	ENSMUSP00000057462	53612	Vti1b	Vti1b	900
ENSMUSP00000040956	109232	Sccpdh	Sccpdh	ENSMUSP00000048667	74145	F13a1	F13a1	900
ENSMUSP00000040956	109232	Sccpdh	Sccpdh	ENSMUSP00000067708	11472	Actn2	Actn2	900
ENSMUSP00000041774	14465	Gata6	Gata6	ENSMUSP00000052591	57246	Tbx20	Tbx20	722
ENSMUSP00000042150	20130	Rras	Rras	ENSMUSP00000051731	140570	Plxnb2	Plxnb2	909
ENSMUSP00000042457	13627	Eef1a1	Eef1a1	ENSMUSP00000078654	319195	Rpl17	Rpl17	855
ENSMUSP00000042457	13627	Eef1a1	Eef1a1	ENSMUSP00000125806	110954	Rpl10	Rpl10	765
ENSMUSP00000042457	13627	Eef1a1	Eef1a1	ENSMUSP00000080854	100503670	Rpl5	Rpl5	885
ENSMUSP00000042457	13627	Eef1a1	Eef1a1	ENSMUSP00000120528	67427	Rps20	Rps20	949
ENSMUSP00000042457	13627	Eef1a1	Eef1a1	ENSMUSP00000127034	13681	Eif4a1	Eif4a1	872
ENSMUSP00000042457	13627	Eef1a1	Eef1a1	ENSMUSP00000136544	18655	Pgk1	Pgk1	799
ENSMUSP00000042457	13627	Eef1a1	Eef1a1	ENSMUSP00000106519	22070	Tpt1	Tpt1	806
ENSMUSP00000043123	83701	Srrt	Srrt	ENSMUSP00000110103	53379	Hnrnpa2b1	Hnrnpa2b1	944
ENSMUSP00000043123	83701	Srrt	Srrt	ENSMUSP00000078469	27967	Cherp	Cherp	920
ENSMUSP00000043123	83701	Srrt	Srrt	ENSMUSP00000112213	60321	Wbp11	Wbp11	902
ENSMUSP00000043123	83701	Srrt	Srrt	ENSMUSP00000085993	75956	Srrm2	Srrm2	911
ENSMUSP00000043123	83701	Srrt	Srrt	ENSMUSP00000125590	231889	Bud31	Bud31	902
ENSMUSP00000043123	83701	Srrt	Srrt	ENSMUSP00000107595	545592	Gm11847	Gm11847	919
ENSMUSP00000043123	83701	Srrt	Srrt	ENSMUSP00000136858	28000	Prpf19	Prpf19	928
ENSMUSP00000044491	236920	Stard8	Stard8	ENSMUSP00000127715	21961	Tns1	Tns1	827
ENSMUSP00000045111	79044	Mrps34	Mrps34	ENSMUSP00000048348	232536	Mrps35	Mrps35	939
ENSMUSP00000045111	79044	Mrps34	Mrps34	ENSMUSP00000055619	66242	Mrps16	Mrps16	989
ENSMUSP00000045111	79044	Mrps34	Mrps34	ENSMUSP00000078123	67681	Mrpl18	Mrpl18	978
ENSMUSP00000045111	79044	Mrps34	Mrps34	ENSMUSP00000076503	28030	Gfm1	Gfm1	902
ENSMUSP00000046540	269113	Nup54	Nup54	ENSMUSP00000076336	18415	Hspa4l	Hspa4l	903
ENSMUSP00000046540	269113	Nup54	Nup54	ENSMUSP00000046759	320727	Ipo8	Ipo8	913
ENSMUSP00000046540	269113	Nup54	Nup54	ENSMUSP00000131850	68051	Nutf2	Nutf2	881
ENSMUSP00000046601	18575	Pde1c	Pde1c	ENSMUSP00000093939	11512	Adcy6	Adcy6	726
ENSMUSP00000046601	18575	Pde1c	Pde1c	ENSMUSP00000110563	224129	Adcy5	Adcy5	791
ENSMUSP00000046639	319518	Pdpr	Pdpr	ENSMUSP00000092821	382051	Pdp2	Pdp2	965
ENSMUSP00000046759	320727	Ipo8	Ipo8	ENSMUSP00000060858	20019	Polr1a	Polr1a	729
ENSMUSP00000046759	320727	Ipo8	Ipo8	ENSMUSP00000079667	76582	Ipo11	Ipo11	796
ENSMUSP00000047208	102323	Dcun1d2	Dcun1d2	ENSMUSP00000060124	14794	Spsb2	Spsb2	900
ENSMUSP00000047208	102323	Dcun1d2	Dcun1d2	ENSMUSP00000115578	22190	Ubc	Ubc	962
ENSMUSP00000047208	102323	Dcun1d2	Dcun1d2	ENSMUSP00000109585	140858	Wdr5	Wdr5	901
ENSMUSP00000047208	102323	Dcun1d2	Dcun1d2	ENSMUSP00000087810	142687	Asb14	Asb14	906
ENSMUSP00000047208	102323	Dcun1d2	Dcun1d2	ENSMUSP00000058233	269529	Fbxo10	Fbxo10	900
ENSMUSP00000047356	16145	Igtp	Igtp	ENSMUSP00000050446	15944	Irgm1	Irgm1	835
ENSMUSP00000047356	16145	Igtp	Igtp	ENSMUSP00000132435	14469	Gbp2	Gbp2	950
ENSMUSP00000047356	16145	Igtp	Igtp	ENSMUSP00000132435	229898	Gbp5	Gbp5	950
ENSMUSP00000047855	73724	Mcee	Mcee	ENSMUSP00000099830	109129	Mmadhc	Mmadhc	718
ENSMUSP00000048041	12509	Cd59a	Cd59a	ENSMUSP00000090089	11735	Ank3	Ank3	900
ENSMUSP00000048041	12509	Cd59a	Cd59a	ENSMUSP00000048092	12267	C3ar1	C3ar1	939
ENSMUSP00000048041	12509	Cd59a	Cd59a	ENSMUSP00000088174	109905	Rap1a	Rap1a	900
ENSMUSP00000048041	12509	Cd59a	Cd59a	ENSMUSP00000121820	193813	Mcfd2	Mcfd2	900
ENSMUSP00000048053	22393	Wfs1	Wfs1	ENSMUSP00000110987	19089	Prkcsh	Prkcsh	902
ENSMUSP00000048053	22393	Wfs1	Wfs1	ENSMUSP00000069087	16779	Lamb2	Lamb2	903
ENSMUSP00000048053	22393	Wfs1	Wfs1	ENSMUSP00000082459	15464	Hrc	Hrc	900
ENSMUSP00000048053	22393	Wfs1	Wfs1	ENSMUSP00000105173	13003	Vcan	Vcan	900
ENSMUSP00000048092	12267	C3ar1	C3ar1	ENSMUSP00000085293	13610	S1pr3	S1pr3	900
ENSMUSP00000048092	12267	C3ar1	C3ar1	ENSMUSP00000048836	12259	C1qa	C1qa	858
ENSMUSP00000048092	12267	C3ar1	C3ar1	ENSMUSP00000100862	12512	Cd63	Cd63	904
ENSMUSP00000048092	12267	C3ar1	C3ar1	ENSMUSP00000063670	574402	Gpr17	Gpr17	900
ENSMUSP00000048092	12267	C3ar1	C3ar1	ENSMUSP00000072800	20315	Cxcl12	Cxcl12	937
ENSMUSP00000048092	12267	C3ar1	C3ar1	ENSMUSP00000113322	19340	Rab3d	Rab3d	900
ENSMUSP00000048092	12267	C3ar1	C3ar1	ENSMUSP00000088174	109905	Rap1a	Rap1a	901
ENSMUSP00000048092	12267	C3ar1	C3ar1	ENSMUSP00000066488	11606	Agt	Agt	910
ENSMUSP00000048092	12267	C3ar1	C3ar1	ENSMUSP00000057543	14678	Gnai2	Gnai2	920
ENSMUSP00000048348	232536	Mrps35	Mrps35	ENSMUSP00000055619	66242	Mrps16	Mrps16	963
ENSMUSP00000048348	232536	Mrps35	Mrps35	ENSMUSP00000078123	67681	Mrpl18	Mrpl18	776
ENSMUSP00000048667	74145	F13a1	F13a1	ENSMUSP00000071370	66866	Nhlrc2	Nhlrc2	900
ENSMUSP00000048667	74145	F13a1	F13a1	ENSMUSP00000107873	22371	Vwf	Vwf	952
ENSMUSP00000048667	74145	F13a1	F13a1	ENSMUSP00000057462	53612	Vti1b	Vti1b	900
ENSMUSP00000048667	74145	F13a1	F13a1	ENSMUSP00000067708	11472	Actn2	Actn2	902
ENSMUSP00000048836	12259	C1qa	C1qa	ENSMUSP00000107607	12628	Cfh	Cfh	799
ENSMUSP00000048836	12259	C1qa	C1qa	ENSMUSP00000139376	667277	C1rb	C1rb	990
ENSMUSP00000049007	12385	Ctnna1	Ctnna1	ENSMUSP00000099815	227937	Pkp4	Pkp4	758
ENSMUSP00000049007	12385	Ctnna1	Ctnna1	ENSMUSP00000101080	216033	Ctnna3	Ctnna3	827
ENSMUSP00000049457	12293	Cacna2d1	Cacna2d1	ENSMUSP00000108413	12288	Cacna1c	Cacna1c	948
ENSMUSP00000049528	19647	Rbbp6	Rbbp6	ENSMUSP00000060124	14794	Spsb2	Spsb2	900
ENSMUSP00000049528	19647	Rbbp6	Rbbp6	ENSMUSP00000115578	22190	Ubc	Ubc	908
ENSMUSP00000049528	19647	Rbbp6	Rbbp6	ENSMUSP00000113928	56317	Anapc7	Anapc7	900
ENSMUSP00000049528	19647	Rbbp6	Rbbp6	ENSMUSP00000136449	207304	Hectd1	Hectd1	916
ENSMUSP00000049528	19647	Rbbp6	Rbbp6	ENSMUSP00000087810	142687	Asb14	Asb14	902
ENSMUSP00000049528	19647	Rbbp6	Rbbp6	ENSMUSP00000083393	59008	Anapc5	Anapc5	900
ENSMUSP00000049528	19647	Rbbp6	Rbbp6	ENSMUSP00000125745	84585	Rnf123	Rnf123	904
ENSMUSP00000049528	19647	Rbbp6	Rbbp6	ENSMUSP00000100058	22214	Ube2h	Ube2h	900
ENSMUSP00000049528	19647	Rbbp6	Rbbp6	ENSMUSP00000058233	269529	Fbxo10	Fbxo10	900
ENSMUSP00000050076	56436	Adrm1	Adrm1	ENSMUSP00000115578	22190	Ubc	Ubc	980
ENSMUSP00000050076	56436	Adrm1	Adrm1	ENSMUSP00000056888	54609	Ubqln2	Ubqln2	787
ENSMUSP00000050076	56436	Adrm1	Adrm1	ENSMUSP00000071589	19185	Psmd4	Psmd4	997
ENSMUSP00000050446	15944	Irgm1	Irgm1	ENSMUSP00000132435	14469	Gbp2	Gbp2	898
ENSMUSP00000050446	15944	Irgm1	Irgm1	ENSMUSP00000132435	229898	Gbp5	Gbp5	898
ENSMUSP00000050771	20020	Polr2a	Polr2a	ENSMUSP00000096728	16658	Mafb	Mafb	902
ENSMUSP00000050771	20020	Polr2a	Polr2a	ENSMUSP00000085416	17979	Ncoa3	Ncoa3	907
ENSMUSP00000050771	20020	Polr2a	Polr2a	ENSMUSP00000139610	213109	Phf3	Phf3	703
ENSMUSP00000050771	20020	Polr2a	Polr2a	ENSMUSP00000113070	57261	Brd4	Brd4	874
ENSMUSP00000050771	20020	Polr2a	Polr2a	ENSMUSP00000109585	140858	Wdr5	Wdr5	964
ENSMUSP00000050771	20020	Polr2a	Polr2a	ENSMUSP00000074310	319169	H2ac15	H2ac15	907
ENSMUSP00000050771	20020	Polr2a	Polr2a	ENSMUSP00000068974	20185	Ncor1	Ncor1	920
ENSMUSP00000051731	140570	Plxnb2	Plxnb2	ENSMUSP00000126598	69632	Arhgef12	Arhgef12	885
ENSMUSP00000053842	83945	Dnaja3	Dnaja3	ENSMUSP00000076336	18415	Hspa4l	Hspa4l	710
ENSMUSP00000053842	83945	Dnaja3	Dnaja3	ENSMUSP00000059538	231134	Dok7	Dok7	752
ENSMUSP00000054072	56310	Gps2	Gps2	ENSMUSP00000068974	20185	Ncor1	Ncor1	981
ENSMUSP00000054634	12540	Cdc42	Cdc42	ENSMUSP00000069851	320404	Itpkb	Itpkb	732
ENSMUSP00000054634	12540	Cdc42	Cdc42	ENSMUSP00000088174	109905	Rap1a	Rap1a	775
ENSMUSP00000054634	12540	Cdc42	Cdc42	ENSMUSP00000105663	14083	Ptk2	Ptk2	842
ENSMUSP00000054634	12540	Cdc42	Cdc42	ENSMUSP00000126598	69632	Arhgef12	Arhgef12	715
ENSMUSP00000054634	12540	Cdc42	Cdc42	ENSMUSP00000107192	56430	Clip1	Clip1	872
ENSMUSP00000055619	66242	Mrps16	Mrps16	ENSMUSP00000080854	100503670	Rpl5	Rpl5	922
ENSMUSP00000055619	66242	Mrps16	Mrps16	ENSMUSP00000101003	75406	Ndufs7	Ndufs7	721
ENSMUSP00000055619	66242	Mrps16	Mrps16	ENSMUSP00000120528	67427	Rps20	Rps20	891
ENSMUSP00000055619	66242	Mrps16	Mrps16	ENSMUSP00000078123	67681	Mrpl18	Mrpl18	979
ENSMUSP00000055619	66242	Mrps16	Mrps16	ENSMUSP00000078654	319195	Rpl17	Rpl17	755
ENSMUSP00000055619	66242	Mrps16	Mrps16	ENSMUSP00000076503	28030	Gfm1	Gfm1	983
ENSMUSP00000056888	54609	Ubqln2	Ubqln2	ENSMUSP00000115578	22190	Ubc	Ubc	978
ENSMUSP00000056888	54609	Ubqln2	Ubqln2	ENSMUSP00000108075	58194	Sh3kbp1	Sh3kbp1	925
ENSMUSP00000056888	54609	Ubqln2	Ubqln2	ENSMUSP00000071589	19185	Psmd4	Psmd4	841
ENSMUSP00000057462	53612	Vti1b	Vti1b	ENSMUSP00000071370	66866	Nhlrc2	Nhlrc2	900
ENSMUSP00000057462	53612	Vti1b	Vti1b	ENSMUSP00000107873	22371	Vwf	Vwf	901
ENSMUSP00000057462	53612	Vti1b	Vti1b	ENSMUSP00000067708	11472	Actn2	Actn2	900
ENSMUSP00000057543	14678	Gnai2	Gnai2	ENSMUSP00000085293	13610	S1pr3	S1pr3	925
ENSMUSP00000057543	14678	Gnai2	Gnai2	ENSMUSP00000063670	574402	Gpr17	Gpr17	905
ENSMUSP00000057543	14678	Gnai2	Gnai2	ENSMUSP00000072800	20315	Cxcl12	Cxcl12	918
ENSMUSP00000057543	14678	Gnai2	Gnai2	ENSMUSP00000115558	19735	Rgs2	Rgs2	742
ENSMUSP00000057543	14678	Gnai2	Gnai2	ENSMUSP00000093939	11512	Adcy6	Adcy6	926
ENSMUSP00000057543	14678	Gnai2	Gnai2	ENSMUSP00000110563	224129	Adcy5	Adcy5	933
ENSMUSP00000057543	14678	Gnai2	Gnai2	ENSMUSP00000066488	11606	Agt	Agt	900
ENSMUSP00000058233	269529	Fbxo10	Fbxo10	ENSMUSP00000060124	14794	Spsb2	Spsb2	906
ENSMUSP00000058233	269529	Fbxo10	Fbxo10	ENSMUSP00000115578	22190	Ubc	Ubc	902
ENSMUSP00000058233	269529	Fbxo10	Fbxo10	ENSMUSP00000113928	56317	Anapc7	Anapc7	902
ENSMUSP00000058233	269529	Fbxo10	Fbxo10	ENSMUSP00000136449	207304	Hectd1	Hectd1	902
ENSMUSP00000058233	269529	Fbxo10	Fbxo10	ENSMUSP00000087810	142687	Asb14	Asb14	900
ENSMUSP00000058233	269529	Fbxo10	Fbxo10	ENSMUSP00000083393	59008	Anapc5	Anapc5	900
ENSMUSP00000058233	269529	Fbxo10	Fbxo10	ENSMUSP00000125745	84585	Rnf123	Rnf123	901
ENSMUSP00000058233	269529	Fbxo10	Fbxo10	ENSMUSP00000100058	22214	Ube2h	Ube2h	901
ENSMUSP00000059395	26905	Eif2s3x	Eif2s3x	ENSMUSP00000080854	100503670	Rpl5	Rpl5	837
ENSMUSP00000059395	26905	Eif2s3x	Eif2s3x	ENSMUSP00000120528	67427	Rps20	Rps20	980
ENSMUSP00000059395	26905	Eif2s3x	Eif2s3x	ENSMUSP00000127034	13681	Eif4a1	Eif4a1	932
ENSMUSP00000059395	26905	Eif2s3x	Eif2s3x	ENSMUSP00000127774	75705	Eif4b	Eif4b	982
ENSMUSP00000060054	107932	Chd4	Chd4	ENSMUSP00000101307	68703	Rere	Rere	783
ENSMUSP00000060054	107932	Chd4	Chd4	ENSMUSP00000113157	12419	Cbx5	Cbx5	838
ENSMUSP00000060054	107932	Chd4	Chd4	ENSMUSP00000068974	20185	Ncor1	Ncor1	750
ENSMUSP00000060124	14794	Spsb2	Spsb2	ENSMUSP00000115578	22190	Ubc	Ubc	924
ENSMUSP00000060124	14794	Spsb2	Spsb2	ENSMUSP00000113928	56317	Anapc7	Anapc7	901
ENSMUSP00000060124	14794	Spsb2	Spsb2	ENSMUSP00000136449	207304	Hectd1	Hectd1	900
ENSMUSP00000060124	14794	Spsb2	Spsb2	ENSMUSP00000087810	142687	Asb14	Asb14	900
ENSMUSP00000060124	14794	Spsb2	Spsb2	ENSMUSP00000083393	59008	Anapc5	Anapc5	900
ENSMUSP00000060124	14794	Spsb2	Spsb2	ENSMUSP00000125745	84585	Rnf123	Rnf123	900
ENSMUSP00000060124	14794	Spsb2	Spsb2	ENSMUSP00000100058	22214	Ube2h	Ube2h	902
ENSMUSP00000060149	238564	Mylk4	Mylk4	ENSMUSP00000123412	67268	Myl12a	Myl12a	837
ENSMUSP00000060149	238564	Mylk4	Mylk4	ENSMUSP00000099985	17898	Myl7	Myl7	787
ENSMUSP00000060157	213436	Rtl3	Rtl3	ENSMUSP00000086158	553127	Rtl8b	Rtl8b	706
ENSMUSP00000060157	213436	Rtl3	Rtl3	ENSMUSP00000086158	66158	Rtl8a	Rtl8a	706
ENSMUSP00000060346	78920	Dlst	Dlst	ENSMUSP00000127526	67834	Idh3a	Idh3a	873
ENSMUSP00000060346	78920	Dlst	Dlst	ENSMUSP00000123765	20916	Sucla2	Sucla2	991
ENSMUSP00000060346	78920	Dlst	Dlst	ENSMUSP00000071292	12039	Bckdha	Bckdha	978
ENSMUSP00000060346	78920	Dlst	Dlst	ENSMUSP00000065113	56451	Suclg1	Suclg1	994
ENSMUSP00000060940	170728	Rtn4ip1	Rtn4ip1	ENSMUSP00000099907	68585	Rtn4	Rtn4	773
ENSMUSP00000061390	57259	Tob2	Tob2	ENSMUSP00000117304	18983	Cnot7	Cnot7	830
ENSMUSP00000061754	14062	F2r	F2r	ENSMUSP00000139347	21333	Tac1	Tac1	908
ENSMUSP00000061754	14062	F2r	F2r	ENSMUSP00000063670	574402	Gpr17	Gpr17	904
ENSMUSP00000061754	14062	F2r	F2r	ENSMUSP00000066488	11606	Agt	Agt	908
ENSMUSP00000062507	399548	Scn4b	Scn4b	ENSMUSP00000096148	20266	Scn1b	Scn1b	976
ENSMUSP00000062924	65079	Rtn4r	Rtn4r	ENSMUSP00000099907	68585	Rtn4	Rtn4	970
ENSMUSP00000063001	232341	Wnk1	Wnk1	ENSMUSP00000115578	22190	Ubc	Ubc	901
ENSMUSP00000063001	232341	Wnk1	Wnk1	ENSMUSP00000099776	53416	Stk39	Stk39	721
ENSMUSP00000063325	11430	Acox1	Acox1	ENSMUSP00000115578	22190	Ubc	Ubc	905
ENSMUSP00000063325	11430	Acox1	Acox1	ENSMUSP00000131735	23986	Eci2	Eci2	982
ENSMUSP00000063325	11430	Acox1	Acox1	ENSMUSP00000095316	15926	Idh1	Idh1	916
ENSMUSP00000063670	574402	Gpr17	Gpr17	ENSMUSP00000139347	21333	Tac1	Tac1	905
ENSMUSP00000063670	574402	Gpr17	Gpr17	ENSMUSP00000085293	13610	S1pr3	S1pr3	900
ENSMUSP00000063670	574402	Gpr17	Gpr17	ENSMUSP00000072800	20315	Cxcl12	Cxcl12	908
ENSMUSP00000063670	574402	Gpr17	Gpr17	ENSMUSP00000066488	11606	Agt	Agt	909
ENSMUSP00000064394	16452	Jak2	Jak2	ENSMUSP00000069851	320404	Itpkb	Itpkb	835
ENSMUSP00000064394	16452	Jak2	Jak2	ENSMUSP00000102981	20851	Stat5b	Stat5b	997
ENSMUSP00000064394	16452	Jak2	Jak2	ENSMUSP00000069457	14600	Ghr	Ghr	987
ENSMUSP00000064394	16452	Jak2	Jak2	ENSMUSP00000095736	16157	Il11ra1	Il11ra1	909
ENSMUSP00000064394	16452	Jak2	Jak2	ENSMUSP00000126137	16880	Lifr	Lifr	945
ENSMUSP00000065113	56451	Suclg1	Suclg1	ENSMUSP00000101003	75406	Ndufs7	Ndufs7	735
ENSMUSP00000065113	56451	Suclg1	Suclg1	ENSMUSP00000099642	100705	Acacb	Acacb	842
ENSMUSP00000065113	56451	Suclg1	Suclg1	ENSMUSP00000127526	67834	Idh3a	Idh3a	943
ENSMUSP00000065113	56451	Suclg1	Suclg1	ENSMUSP00000123765	20916	Sucla2	Sucla2	999
ENSMUSP00000065113	56451	Suclg1	Suclg1	ENSMUSP00000071292	12039	Bckdha	Bckdha	727
ENSMUSP00000065113	56451	Suclg1	Suclg1	ENSMUSP00000103007	269951	Idh2	Idh2	752
ENSMUSP00000066488	11606	Agt	Agt	ENSMUSP00000085293	13610	S1pr3	S1pr3	908
ENSMUSP00000066488	11606	Agt	Agt	ENSMUSP00000069851	320404	Itpkb	Itpkb	713
ENSMUSP00000066488	11606	Agt	Agt	ENSMUSP00000072800	20315	Cxcl12	Cxcl12	933
ENSMUSP00000066488	11606	Agt	Agt	ENSMUSP00000139347	21333	Tac1	Tac1	942
ENSMUSP00000066488	11606	Agt	Agt	ENSMUSP00000098768	20657	Sod3	Sod3	729
ENSMUSP00000066515	56386	B4galt6	B4galt6	ENSMUSP00000130660	14466	Gba	Gba	964
ENSMUSP00000067708	11472	Actn2	Actn2	ENSMUSP00000122925	21952	Tnni1	Tnni1	989
ENSMUSP00000067708	11472	Actn2	Actn2	ENSMUSP00000107873	22371	Vwf	Vwf	923
ENSMUSP00000067708	11472	Actn2	Actn2	ENSMUSP00000080538	140781	Myh7	Myh7	995
ENSMUSP00000067708	11472	Actn2	Actn2	ENSMUSP00000107717	21956	Tnnt2	Tnnt2	990
ENSMUSP00000067708	11472	Actn2	Actn2	ENSMUSP00000127070	17868	Mybpc3	Mybpc3	968
ENSMUSP00000067708	11472	Actn2	Actn2	ENSMUSP00000071370	66866	Nhlrc2	Nhlrc2	900
ENSMUSP00000067708	11472	Actn2	Actn2	ENSMUSP00000082459	15464	Hrc	Hrc	718
ENSMUSP00000067708	11472	Actn2	Actn2	ENSMUSP00000103402	21916	Tmod1	Tmod1	931
ENSMUSP00000068690	225010	Lclat1	Lclat1	ENSMUSP00000117025	52123	Agpat5	Agpat5	848
ENSMUSP00000068690	225010	Lclat1	Lclat1	ENSMUSP00000127325	102247	Gpat4	Gpat4	867
ENSMUSP00000068690	225010	Lclat1	Lclat1	ENSMUSP00000099470	110911	Cds2	Cds2	954
ENSMUSP00000068690	225010	Lclat1	Lclat1	ENSMUSP00000070583	14245	Lpin1	Lpin1	749
ENSMUSP00000068974	20185	Ncor1	Ncor1	ENSMUSP00000085416	17979	Ncoa3	Ncoa3	974
ENSMUSP00000068974	20185	Ncor1	Ncor1	ENSMUSP00000105243	109151	Chd9	Chd9	947
ENSMUSP00000068974	20185	Ncor1	Ncor1	ENSMUSP00000109585	140858	Wdr5	Wdr5	918
ENSMUSP00000068974	20185	Ncor1	Ncor1	ENSMUSP00000074310	319169	H2ac15	H2ac15	901
ENSMUSP00000069087	16779	Lamb2	Lamb2	ENSMUSP00000110987	19089	Prkcsh	Prkcsh	903
ENSMUSP00000069087	16779	Lamb2	Lamb2	ENSMUSP00000105663	14083	Ptk2	Ptk2	907
ENSMUSP00000069087	16779	Lamb2	Lamb2	ENSMUSP00000082459	15464	Hrc	Hrc	904
ENSMUSP00000069087	16779	Lamb2	Lamb2	ENSMUSP00000105173	13003	Vcan	Vcan	905
ENSMUSP00000069228	65098	Zfand6	Zfand6	ENSMUSP00000086716	22284	Usp9x	Usp9x	923
ENSMUSP00000069228	65098	Zfand6	Zfand6	ENSMUSP00000115578	22190	Ubc	Ubc	933
ENSMUSP00000069457	14600	Ghr	Ghr	ENSMUSP00000102981	20851	Stat5b	Stat5b	974
ENSMUSP00000069851	320404	Itpkb	Itpkb	ENSMUSP00000072800	20315	Cxcl12	Cxcl12	700
ENSMUSP00000069851	320404	Itpkb	Itpkb	ENSMUSP00000099862	21687	Tek	Tek	704
ENSMUSP00000069851	320404	Itpkb	Itpkb	ENSMUSP00000105663	14083	Ptk2	Ptk2	736
ENSMUSP00000069851	320404	Itpkb	Itpkb	ENSMUSP00000110746	11798	Xiap	Xiap	701
ENSMUSP00000070134	19328	Rab12	Rab12	ENSMUSP00000113322	19340	Rab3d	Rab3d	908
ENSMUSP00000070583	14245	Lpin1	Lpin1	ENSMUSP00000117025	52123	Agpat5	Agpat5	743
ENSMUSP00000070583	14245	Lpin1	Lpin1	ENSMUSP00000099470	110911	Cds2	Cds2	723
ENSMUSP00000070583	14245	Lpin1	Lpin1	ENSMUSP00000104234	67181	Ctdnep1	Ctdnep1	978
ENSMUSP00000070726	226849	Ppp2r5a	Ppp2r5a	ENSMUSP00000115578	22190	Ubc	Ubc	901
ENSMUSP00000070726	226849	Ppp2r5a	Ppp2r5a	ENSMUSP00000117153	67733	Itgb3bp	Itgb3bp	907
ENSMUSP00000070726	226849	Ppp2r5a	Ppp2r5a	ENSMUSP00000071589	19185	Psmd4	Psmd4	905
ENSMUSP00000070726	226849	Ppp2r5a	Ppp2r5a	ENSMUSP00000104234	67181	Ctdnep1	Ctdnep1	740
ENSMUSP00000070726	226849	Ppp2r5a	Ppp2r5a	ENSMUSP00000107192	56430	Clip1	Clip1	904
ENSMUSP00000071370	66866	Nhlrc2	Nhlrc2	ENSMUSP00000107873	22371	Vwf	Vwf	901
ENSMUSP00000071370	66866	Nhlrc2	Nhlrc2	ENSMUSP00000076157	66980	Zdhhc6	Zdhhc6	751
ENSMUSP00000071589	19185	Psmd4	Psmd4	ENSMUSP00000115578	22190	Ubc	Ubc	988
ENSMUSP00000071589	19185	Psmd4	Psmd4	ENSMUSP00000113928	56317	Anapc7	Anapc7	903
ENSMUSP00000071589	19185	Psmd4	Psmd4	ENSMUSP00000124215	68031	Rnf146	Rnf146	900
ENSMUSP00000071589	19185	Psmd4	Psmd4	ENSMUSP00000083393	59008	Anapc5	Anapc5	936
ENSMUSP00000071589	19185	Psmd4	Psmd4	ENSMUSP00000102852	18720	Pip5k1a	Pip5k1a	757
ENSMUSP00000072155	72607	Usp13	Usp13	ENSMUSP00000115578	22190	Ubc	Ubc	975
ENSMUSP00000072334	140580	Elmo1	Elmo1	ENSMUSP00000105663	14083	Ptk2	Ptk2	910
ENSMUSP00000072334	140580	Elmo1	Elmo1	ENSMUSP00000088174	109905	Rap1a	Rap1a	782
ENSMUSP00000072800	20315	Cxcl12	Cxcl12	ENSMUSP00000085293	13610	S1pr3	S1pr3	940
ENSMUSP00000072800	20315	Cxcl12	Cxcl12	ENSMUSP00000099862	21687	Tek	Tek	704
ENSMUSP00000072929	66753	Erlec1	Erlec1	ENSMUSP00000115578	22190	Ubc	Ubc	904
ENSMUSP00000074310	319169	H2ac15	H2ac15	ENSMUSP00000109585	140858	Wdr5	Wdr5	903
ENSMUSP00000074310	319169	H2ac15	H2ac15	ENSMUSP00000086724	223697	Sun2	Sun2	900
ENSMUSP00000074310	319169	H2ac15	H2ac15	ENSMUSP00000096728	16658	Mafb	Mafb	900
ENSMUSP00000074310	319169	H2ac15	H2ac15	ENSMUSP00000085416	17979	Ncoa3	Ncoa3	900
ENSMUSP00000075063	545622	Ptpn3	Ptpn3	ENSMUSP00000108075	58194	Sh3kbp1	Sh3kbp1	900
ENSMUSP00000076503	28030	Gfm1	Gfm1	ENSMUSP00000080854	100503670	Rpl5	Rpl5	811
ENSMUSP00000076503	28030	Gfm1	Gfm1	ENSMUSP00000120528	67427	Rps20	Rps20	723
ENSMUSP00000076503	28030	Gfm1	Gfm1	ENSMUSP00000078123	67681	Mrpl18	Mrpl18	913
ENSMUSP00000076751	80281	Cttnbp2nl	Cttnbp2nl	ENSMUSP00000120830	268980	Strn	Strn	913
ENSMUSP00000077123	99031	Osbpl6	Osbpl6	ENSMUSP00000107595	545592	Gm11847	Gm11847	720
ENSMUSP00000077132	109700	Itga1	Itga1	ENSMUSP00000097066	20411	Sorbs1	Sorbs1	930
ENSMUSP00000077132	109700	Itga1	Itga1	ENSMUSP00000105663	14083	Ptk2	Ptk2	844
ENSMUSP00000077132	109700	Itga1	Itga1	ENSMUSP00000099985	17898	Myl7	Myl7	906
ENSMUSP00000077446	75734	Mff	Mff	ENSMUSP00000124223	74143	Opa1	Opa1	854
ENSMUSP00000077446	75734	Mff	Mff	ENSMUSP00000111415	74006	Dnm1l	Dnm1l	929
ENSMUSP00000078469	27967	Cherp	Cherp	ENSMUSP00000112213	60321	Wbp11	Wbp11	911
ENSMUSP00000078469	27967	Cherp	Cherp	ENSMUSP00000110103	53379	Hnrnpa2b1	Hnrnpa2b1	904
ENSMUSP00000078469	27967	Cherp	Cherp	ENSMUSP00000085993	75956	Srrm2	Srrm2	906
ENSMUSP00000078469	27967	Cherp	Cherp	ENSMUSP00000125590	231889	Bud31	Bud31	902
ENSMUSP00000078469	27967	Cherp	Cherp	ENSMUSP00000107595	545592	Gm11847	Gm11847	902
ENSMUSP00000078469	27967	Cherp	Cherp	ENSMUSP00000136858	28000	Prpf19	Prpf19	903
ENSMUSP00000078654	319195	Rpl17	Rpl17	ENSMUSP00000125806	110954	Rpl10	Rpl10	962
ENSMUSP00000078654	319195	Rpl17	Rpl17	ENSMUSP00000080854	100503670	Rpl5	Rpl5	994
ENSMUSP00000078654	319195	Rpl17	Rpl17	ENSMUSP00000120528	67427	Rps20	Rps20	992
ENSMUSP00000078654	319195	Rpl17	Rpl17	ENSMUSP00000113116	16430	Stt3a	Stt3a	746
ENSMUSP00000078654	319195	Rpl17	Rpl17	ENSMUSP00000106336	100101806	Srp54c	Srp54c	770
ENSMUSP00000079727	13806	Eno1	Eno1	ENSMUSP00000136544	18655	Pgk1	Pgk1	949
ENSMUSP00000080538	140781	Myh7	Myh7	ENSMUSP00000122925	21952	Tnni1	Tnni1	992
ENSMUSP00000080538	140781	Myh7	Myh7	ENSMUSP00000107717	21956	Tnnt2	Tnnt2	992
ENSMUSP00000080538	140781	Myh7	Myh7	ENSMUSP00000127070	17868	Mybpc3	Mybpc3	993
ENSMUSP00000080538	140781	Myh7	Myh7	ENSMUSP00000099985	17898	Myl7	Myl7	868
ENSMUSP00000080538	140781	Myh7	Myh7	ENSMUSP00000103402	21916	Tmod1	Tmod1	922
ENSMUSP00000080854	100503670	Rpl5	Rpl5	ENSMUSP00000125806	110954	Rpl10	Rpl10	992
ENSMUSP00000080854	100503670	Rpl5	Rpl5	ENSMUSP00000120528	67427	Rps20	Rps20	998
ENSMUSP00000080854	100503670	Rpl5	Rpl5	ENSMUSP00000127034	13681	Eif4a1	Eif4a1	735
ENSMUSP00000080854	100503670	Rpl5	Rpl5	ENSMUSP00000106519	22070	Tpt1	Tpt1	835
ENSMUSP00000080854	100503670	Rpl5	Rpl5	ENSMUSP00000106336	100101806	Srp54c	Srp54c	727
ENSMUSP00000081011	14778	Gpx3	Gpx3	ENSMUSP00000098768	20657	Sod3	Sod3	711
ENSMUSP00000081557	73750	Whrn	Whrn	ENSMUSP00000102745	17921	Myo7a	Myo7a	833
ENSMUSP00000081941	56693	Crtap	Crtap	ENSMUSP00000108553	12830	Col4a5	Col4a5	909
ENSMUSP00000082459	15464	Hrc	Hrc	ENSMUSP00000110987	19089	Prkcsh	Prkcsh	900
ENSMUSP00000082459	15464	Hrc	Hrc	ENSMUSP00000125995	17189	Mb	Mb	730
ENSMUSP00000082459	15464	Hrc	Hrc	ENSMUSP00000105173	13003	Vcan	Vcan	902
ENSMUSP00000083393	59008	Anapc5	Anapc5	ENSMUSP00000115578	22190	Ubc	Ubc	900
ENSMUSP00000083393	59008	Anapc5	Anapc5	ENSMUSP00000113928	56317	Anapc7	Anapc7	998
ENSMUSP00000083393	59008	Anapc5	Anapc5	ENSMUSP00000136449	207304	Hectd1	Hectd1	900
ENSMUSP00000083393	59008	Anapc5	Anapc5	ENSMUSP00000087810	142687	Asb14	Asb14	901
ENSMUSP00000083393	59008	Anapc5	Anapc5	ENSMUSP00000125745	84585	Rnf123	Rnf123	900
ENSMUSP00000083393	59008	Anapc5	Anapc5	ENSMUSP00000100058	22214	Ube2h	Ube2h	902
ENSMUSP00000085416	17979	Ncoa3	Ncoa3	ENSMUSP00000109585	140858	Wdr5	Wdr5	912
ENSMUSP00000085734	20817	Srpk2	Srpk2	ENSMUSP00000136858	28000	Prpf19	Prpf19	728
ENSMUSP00000085993	75956	Srrm2	Srrm2	ENSMUSP00000110103	53379	Hnrnpa2b1	Hnrnpa2b1	936
ENSMUSP00000085993	75956	Srrm2	Srrm2	ENSMUSP00000112213	60321	Wbp11	Wbp11	908
ENSMUSP00000085993	75956	Srrm2	Srrm2	ENSMUSP00000125590	231889	Bud31	Bud31	982
ENSMUSP00000085993	75956	Srrm2	Srrm2	ENSMUSP00000107595	545592	Gm11847	Gm11847	936
ENSMUSP00000085993	75956	Srrm2	Srrm2	ENSMUSP00000136858	28000	Prpf19	Prpf19	982
ENSMUSP00000086716	22284	Usp9x	Usp9x	ENSMUSP00000115578	22190	Ubc	Ubc	963
ENSMUSP00000087810	142687	Asb14	Asb14	ENSMUSP00000115578	22190	Ubc	Ubc	916
ENSMUSP00000087810	142687	Asb14	Asb14	ENSMUSP00000113928	56317	Anapc7	Anapc7	900
ENSMUSP00000087810	142687	Asb14	Asb14	ENSMUSP00000125745	84585	Rnf123	Rnf123	912
ENSMUSP00000087810	142687	Asb14	Asb14	ENSMUSP00000136449	207304	Hectd1	Hectd1	904
ENSMUSP00000087810	142687	Asb14	Asb14	ENSMUSP00000100058	22214	Ube2h	Ube2h	905
ENSMUSP00000088174	109905	Rap1a	Rap1a	ENSMUSP00000107873	22371	Vwf	Vwf	906
ENSMUSP00000088174	109905	Rap1a	Rap1a	ENSMUSP00000105663	14083	Ptk2	Ptk2	916
ENSMUSP00000090089	11735	Ank3	Ank3	ENSMUSP00000108413	12288	Cacna1c	Cacna1c	711
ENSMUSP00000091692	14276	Folr2	Folr2	ENSMUSP00000110489	21838	Thy1	Thy1	900
ENSMUSP00000091692	14276	Folr2	Folr2	ENSMUSP00000113493	109979	Art3	Art3	903
ENSMUSP00000091692	14276	Folr2	Folr2	ENSMUSP00000126529	74762	Mdga1	Mdga1	903
ENSMUSP00000093939	11512	Adcy6	Adcy6	ENSMUSP00000110563	224129	Adcy5	Adcy5	906
ENSMUSP00000095316	15926	Idh1	Idh1	ENSMUSP00000115578	22190	Ubc	Ubc	906
ENSMUSP00000095316	15926	Idh1	Idh1	ENSMUSP00000100038	11428	Aco1	Aco1	964
ENSMUSP00000095316	15926	Idh1	Idh1	ENSMUSP00000127526	67834	Idh3a	Idh3a	987
ENSMUSP00000095316	15926	Idh1	Idh1	ENSMUSP00000131735	23986	Eci2	Eci2	919
ENSMUSP00000095316	15926	Idh1	Idh1	ENSMUSP00000103007	269951	Idh2	Idh2	951
ENSMUSP00000096148	20266	Scn1b	Scn1b	ENSMUSP00000108413	12288	Cacna1c	Cacna1c	709
ENSMUSP00000096728	16658	Mafb	Mafb	ENSMUSP00000109585	140858	Wdr5	Wdr5	902
ENSMUSP00000096877	21824	Thbd	Thbd	ENSMUSP00000107873	22371	Vwf	Vwf	803
ENSMUSP00000097066	20411	Sorbs1	Sorbs1	ENSMUSP00000099985	17898	Myl7	Myl7	903
ENSMUSP00000097442	238505	Mtr	Mtr	ENSMUSP00000099830	109129	Mmadhc	Mmadhc	982
ENSMUSP00000097442	238505	Mtr	Mtr	ENSMUSP00000110897	74340	Ahcyl2	Ahcyl2	947
ENSMUSP00000099470	110911	Cds2	Cds2	ENSMUSP00000117025	52123	Agpat5	Agpat5	915
ENSMUSP00000099470	110911	Cds2	Cds2	ENSMUSP00000127325	102247	Gpat4	Gpat4	915
ENSMUSP00000099642	100705	Acacb	Acacb	ENSMUSP00000123765	20916	Sucla2	Sucla2	855
ENSMUSP00000099815	227937	Pkp4	Pkp4	ENSMUSP00000115062	109620	Dsp	Dsp	965
ENSMUSP00000099862	21687	Tek	Tek	ENSMUSP00000107873	22371	Vwf	Vwf	764
ENSMUSP00000099985	17898	Myl7	Myl7	ENSMUSP00000107717	21956	Tnnt2	Tnnt2	954
ENSMUSP00000100038	11428	Aco1	Aco1	ENSMUSP00000127526	67834	Idh3a	Idh3a	961
ENSMUSP00000100038	11428	Aco1	Aco1	ENSMUSP00000103007	269951	Idh2	Idh2	965
ENSMUSP00000100058	22214	Ube2h	Ube2h	ENSMUSP00000115578	22190	Ubc	Ubc	945
ENSMUSP00000100058	22214	Ube2h	Ube2h	ENSMUSP00000113928	56317	Anapc7	Anapc7	914
ENSMUSP00000100058	22214	Ube2h	Ube2h	ENSMUSP00000136449	207304	Hectd1	Hectd1	913
ENSMUSP00000100058	22214	Ube2h	Ube2h	ENSMUSP00000125745	84585	Rnf123	Rnf123	904
ENSMUSP00000100862	12512	Cd63	Cd63	ENSMUSP00000113322	19340	Rab3d	Rab3d	913
ENSMUSP00000101003	75406	Ndufs7	Ndufs7	ENSMUSP00000130532	75597	Ndufaf2	Ndufaf2	950
ENSMUSP00000101003	75406	Ndufs7	Ndufs7	ENSMUSP00000137424	26940	Ecsit	Ecsit	990
ENSMUSP00000101307	68703	Rere	Rere	ENSMUSP00000109585	140858	Wdr5	Wdr5	736
ENSMUSP00000101307	68703	Rere	Rere	ENSMUSP00000113157	12419	Cbx5	Cbx5	725
ENSMUSP00000103007	269951	Idh2	Idh2	ENSMUSP00000127526	67834	Idh3a	Idh3a	991
ENSMUSP00000103007	269951	Idh2	Idh2	ENSMUSP00000123765	20916	Sucla2	Sucla2	771
ENSMUSP00000103402	21916	Tmod1	Tmod1	ENSMUSP00000122925	21952	Tnni1	Tnni1	927
ENSMUSP00000103402	21916	Tmod1	Tmod1	ENSMUSP00000107717	21956	Tnnt2	Tnnt2	934
ENSMUSP00000103402	21916	Tmod1	Tmod1	ENSMUSP00000127070	17868	Mybpc3	Mybpc3	943
ENSMUSP00000104864	170625	Snx18	Snx18	ENSMUSP00000115578	22190	Ubc	Ubc	906
ENSMUSP00000104864	170625	Snx18	Snx18	ENSMUSP00000108075	58194	Sh3kbp1	Sh3kbp1	912
ENSMUSP00000105173	13003	Vcan	Vcan	ENSMUSP00000110987	19089	Prkcsh	Prkcsh	900
ENSMUSP00000105663	14083	Ptk2	Ptk2	ENSMUSP00000107873	22371	Vwf	Vwf	924
ENSMUSP00000105663	14083	Ptk2	Ptk2	ENSMUSP00000120240	330319	Wipf3	Wipf3	903
ENSMUSP00000106336	100101806	Srp54c	Srp54c	ENSMUSP00000120528	67427	Rps20	Rps20	842
ENSMUSP00000106519	22070	Tpt1	Tpt1	ENSMUSP00000125806	110954	Rpl10	Rpl10	771
ENSMUSP00000106519	22070	Tpt1	Tpt1	ENSMUSP00000120528	67427	Rps20	Rps20	843
ENSMUSP00000106519	22070	Tpt1	Tpt1	ENSMUSP00000108260	68428	Steap3	Steap3	775
ENSMUSP00000107192	56430	Clip1	Clip1	ENSMUSP00000117153	67733	Itgb3bp	Itgb3bp	900
ENSMUSP00000107595	545592	Gm11847	Gm11847	ENSMUSP00000112213	60321	Wbp11	Wbp11	903
ENSMUSP00000107595	545592	Gm11847	Gm11847	ENSMUSP00000125590	231889	Bud31	Bud31	935
ENSMUSP00000107595	545592	Gm11847	Gm11847	ENSMUSP00000110103	53379	Hnrnpa2b1	Hnrnpa2b1	981
ENSMUSP00000107595	545592	Gm11847	Gm11847	ENSMUSP00000136858	28000	Prpf19	Prpf19	956
ENSMUSP00000107717	21956	Tnnt2	Tnnt2	ENSMUSP00000122925	21952	Tnni1	Tnni1	993
ENSMUSP00000107717	21956	Tnnt2	Tnnt2	ENSMUSP00000127070	17868	Mybpc3	Mybpc3	993
ENSMUSP00000108075	58194	Sh3kbp1	Sh3kbp1	ENSMUSP00000115578	22190	Ubc	Ubc	977
ENSMUSP00000108075	58194	Sh3kbp1	Sh3kbp1	ENSMUSP00000127329	22359	Vldlr	Vldlr	909
ENSMUSP00000108148	20603	Sms	Sms	ENSMUSP00000129704	67870	Enoph1	Enoph1	891
ENSMUSP00000108413	12288	Cacna1c	Cacna1c	ENSMUSP00000125142	80906	Kcnip2	Kcnip2	812
ENSMUSP00000109271	81601	Kat5	Kat5	ENSMUSP00000115578	22190	Ubc	Ubc	911
ENSMUSP00000109271	81601	Kat5	Kat5	ENSMUSP00000128483	66471	Anp32e	Anp32e	815
ENSMUSP00000109271	81601	Kat5	Kat5	ENSMUSP00000109585	140858	Wdr5	Wdr5	870
ENSMUSP00000110103	53379	Hnrnpa2b1	Hnrnpa2b1	ENSMUSP00000112213	60321	Wbp11	Wbp11	901
ENSMUSP00000110103	53379	Hnrnpa2b1	Hnrnpa2b1	ENSMUSP00000125590	231889	Bud31	Bud31	935
ENSMUSP00000110103	53379	Hnrnpa2b1	Hnrnpa2b1	ENSMUSP00000125761	17184	Matr3	Matr3	911
ENSMUSP00000110103	53379	Hnrnpa2b1	Hnrnpa2b1	ENSMUSP00000136858	28000	Prpf19	Prpf19	982
ENSMUSP00000110489	21838	Thy1	Thy1	ENSMUSP00000113493	109979	Art3	Art3	902
ENSMUSP00000110489	21838	Thy1	Thy1	ENSMUSP00000126529	74762	Mdga1	Mdga1	903
ENSMUSP00000110746	11798	Xiap	Xiap	ENSMUSP00000115578	22190	Ubc	Ubc	922
ENSMUSP00000111415	74006	Dnm1l	Dnm1l	ENSMUSP00000124223	74143	Opa1	Opa1	700
ENSMUSP00000112213	60321	Wbp11	Wbp11	ENSMUSP00000125590	231889	Bud31	Bud31	901
ENSMUSP00000112213	60321	Wbp11	Wbp11	ENSMUSP00000136858	28000	Prpf19	Prpf19	907
ENSMUSP00000113493	109979	Art3	Art3	ENSMUSP00000126529	74762	Mdga1	Mdga1	900
ENSMUSP00000113928	56317	Anapc7	Anapc7	ENSMUSP00000115578	22190	Ubc	Ubc	900
ENSMUSP00000113928	56317	Anapc7	Anapc7	ENSMUSP00000136449	207304	Hectd1	Hectd1	913
ENSMUSP00000113928	56317	Anapc7	Anapc7	ENSMUSP00000125745	84585	Rnf123	Rnf123	900
ENSMUSP00000115578	22190	Ubc	Ubc	ENSMUSP00000124215	68031	Rnf146	Rnf146	903
ENSMUSP00000115578	22190	Ubc	Ubc	ENSMUSP00000125745	84585	Rnf123	Rnf123	908
ENSMUSP00000115578	22190	Ubc	Ubc	ENSMUSP00000131735	23986	Eci2	Eci2	903
ENSMUSP00000115578	22190	Ubc	Ubc	ENSMUSP00000132117	225131	Wac	Wac	901
ENSMUSP00000115578	22190	Ubc	Ubc	ENSMUSP00000117153	67733	Itgb3bp	Itgb3bp	900
ENSMUSP00000115578	22190	Ubc	Ubc	ENSMUSP00000136449	207304	Hectd1	Hectd1	918
ENSMUSP00000115578	22190	Ubc	Ubc	ENSMUSP00000136858	28000	Prpf19	Prpf19	903
ENSMUSP00000117025	52123	Agpat5	Agpat5	ENSMUSP00000127325	102247	Gpat4	Gpat4	891
ENSMUSP00000117304	18983	Cnot7	Cnot7	ENSMUSP00000121239	104625	Cnot6	Cnot6	998
ENSMUSP00000120528	67427	Rps20	Rps20	ENSMUSP00000127774	75705	Eif4b	Eif4b	882
ENSMUSP00000120528	67427	Rps20	Rps20	ENSMUSP00000125806	110954	Rpl10	Rpl10	990
ENSMUSP00000120528	67427	Rps20	Rps20	ENSMUSP00000127034	13681	Eif4a1	Eif4a1	762
ENSMUSP00000122925	21952	Tnni1	Tnni1	ENSMUSP00000127070	17868	Mybpc3	Mybpc3	957
ENSMUSP00000123765	20916	Sucla2	Sucla2	ENSMUSP00000127526	67834	Idh3a	Idh3a	965
ENSMUSP00000125590	231889	Bud31	Bud31	ENSMUSP00000136858	28000	Prpf19	Prpf19	995
ENSMUSP00000125745	84585	Rnf123	Rnf123	ENSMUSP00000136449	207304	Hectd1	Hectd1	902
ENSMUSP00000127034	13681	Eif4a1	Eif4a1	ENSMUSP00000127774	75705	Eif4b	Eif4b	995
ENSMUSP00000130532	75597	Ndufaf2	Ndufaf2	ENSMUSP00000137424	26940	Ecsit	Ecsit	951

## Sheet: HypoTH+T3 vs HypoTH
Protein_id1	Gene_id1	Official_Symbol	Description	Protein_id2	Gene_id2	Official_Symbol	Description	PPI_score
ENSMUSP00000001452	12462	Cct3	Cct3	ENSMUSP00000046101	13629	Eef2	Eef2	721
ENSMUSP00000002048	70207	Taco1	Taco1	ENSMUSP00000076503	28030	Gfm1	Gfm1	738
ENSMUSP00000004396	66144	Atp6v1f	Atp6v1f	ENSMUSP00000026459	11947	Atp5b	Atp5b	772
ENSMUSP00000004396	66144	Atp6v1f	Atp6v1f	ENSMUSP00000113022	11950	Atp5pb	Atp5pb	780
ENSMUSP00000005431	56384	Letm1	Letm1	ENSMUSP00000020312	215999	Mcu	Mcu	835
ENSMUSP00000005431	56384	Letm1	Letm1	ENSMUSP00000022543	68514	Micu2	Micu2	779
ENSMUSP00000005826	12974	Cs	Cs	ENSMUSP00000026196	14718	Got1	Got1	866
ENSMUSP00000005826	210582	Coq10a	Coq10a	ENSMUSP00000026196	14718	Got1	Got1	866
ENSMUSP00000005826	12974	Cs	Cs	ENSMUSP00000019323	17448	Mdh2	Mdh2	995
ENSMUSP00000005826	210582	Coq10a	Coq10a	ENSMUSP00000019323	17448	Mdh2	Mdh2	995
ENSMUSP00000005826	12974	Cs	Cs	ENSMUSP00000127526	67834	Idh3a	Idh3a	914
ENSMUSP00000005826	210582	Coq10a	Coq10a	ENSMUSP00000127526	67834	Idh3a	Idh3a	914
ENSMUSP00000005826	12974	Cs	Cs	ENSMUSP00000123765	20916	Sucla2	Sucla2	777
ENSMUSP00000005826	210582	Coq10a	Coq10a	ENSMUSP00000123765	20916	Sucla2	Sucla2	777
ENSMUSP00000005826	12974	Cs	Cs	ENSMUSP00000034567	235339	Dlat	Dlat	990
ENSMUSP00000005826	210582	Coq10a	Coq10a	ENSMUSP00000034567	235339	Dlat	Dlat	990
ENSMUSP00000005826	12974	Cs	Cs	ENSMUSP00000026459	11947	Atp5b	Atp5b	877
ENSMUSP00000005826	210582	Coq10a	Coq10a	ENSMUSP00000026459	11947	Atp5b	Atp5b	877
ENSMUSP00000005826	12974	Cs	Cs	ENSMUSP00000023210	66445	Cyc1	Cyc1	721
ENSMUSP00000005826	210582	Coq10a	Coq10a	ENSMUSP00000023210	66445	Cyc1	Cyc1	721
ENSMUSP00000005826	12974	Cs	Cs	ENSMUSP00000023116	11429	Aco2	Aco2	989
ENSMUSP00000005826	210582	Coq10a	Coq10a	ENSMUSP00000023116	11429	Aco2	Aco2	989
ENSMUSP00000005826	12974	Cs	Cs	ENSMUSP00000065113	56451	Suclg1	Suclg1	811
ENSMUSP00000005826	210582	Coq10a	Coq10a	ENSMUSP00000065113	56451	Suclg1	Suclg1	811
ENSMUSP00000009689	16535	Kcnq1	Kcnq1	ENSMUSP00000052248	16509	Kcne1	Kcne1	996
ENSMUSP00000017288	74194	Rnd3	Rnd3	ENSMUSP00000051731	140570	Plxnb2	Plxnb2	783
ENSMUSP00000018800	17896	Myl4	Myl4	ENSMUSP00000080538	140781	Myh7	Myh7	981
ENSMUSP00000019323	17448	Mdh2	Mdh2	ENSMUSP00000026196	14718	Got1	Got1	953
ENSMUSP00000019323	17448	Mdh2	Mdh2	ENSMUSP00000127526	67834	Idh3a	Idh3a	879
ENSMUSP00000019323	17448	Mdh2	Mdh2	ENSMUSP00000123765	20916	Sucla2	Sucla2	737
ENSMUSP00000019323	17448	Mdh2	Mdh2	ENSMUSP00000026459	11947	Atp5b	Atp5b	937
ENSMUSP00000019323	17448	Mdh2	Mdh2	ENSMUSP00000023210	66445	Cyc1	Cyc1	902
ENSMUSP00000019323	17448	Mdh2	Mdh2	ENSMUSP00000023116	11429	Aco2	Aco2	935
ENSMUSP00000019323	17448	Mdh2	Mdh2	ENSMUSP00000022268	68263	Pdhb	Pdhb	753
ENSMUSP00000019323	17448	Mdh2	Mdh2	ENSMUSP00000033662	18597	Pdha1	Pdha1	707
ENSMUSP00000019323	17448	Mdh2	Mdh2	ENSMUSP00000065113	56451	Suclg1	Suclg1	958
ENSMUSP00000019323	17448	Mdh2	Mdh2	ENSMUSP00000113022	11950	Atp5pb	Atp5pb	882
ENSMUSP00000019517	26572	Cops3	Cops3	ENSMUSP00000087810	142687	Asb14	Asb14	903
ENSMUSP00000019517	26572	Cops3	Cops3	ENSMUSP00000076160	26374	Cop1	Cop1	903
ENSMUSP00000019649	22187	Ubb	Ubb	ENSMUSP00000020085	216080	Ube2d1	Ube2d1	967
ENSMUSP00000019649	22187	Ubb	Ubb	ENSMUSP00000089728	59025	Usp14	Usp14	788
ENSMUSP00000019649	22187	Ubb	Ubb	ENSMUSP00000034740	17999	Nedd4	Nedd4	802
ENSMUSP00000019649	22187	Ubb	Ubb	ENSMUSP00000072155	72607	Usp13	Usp13	766
ENSMUSP00000019649	22187	Ubb	Ubb	ENSMUSP00000031131	22223	Uchl1	Uchl1	716
ENSMUSP00000019649	22187	Ubb	Ubb	ENSMUSP00000034508	53376	Usp2	Usp2	736
ENSMUSP00000019649	22187	Ubb	Ubb	ENSMUSP00000025679	107227	Macrod1	Macrod1	822
ENSMUSP00000020085	216080	Ube2d1	Ube2d1	ENSMUSP00000034740	17999	Nedd4	Nedd4	980
ENSMUSP00000020085	216080	Ube2d1	Ube2d1	ENSMUSP00000069228	65098	Zfand6	Zfand6	906
ENSMUSP00000020085	216080	Ube2d1	Ube2d1	ENSMUSP00000087810	142687	Asb14	Asb14	913
ENSMUSP00000020085	216080	Ube2d1	Ube2d1	ENSMUSP00000025679	107227	Macrod1	Macrod1	984
ENSMUSP00000020223	216198	Tcp11l2	Tcp11l2	ENSMUSP00000069505	21833	Thra	Thra	774
ENSMUSP00000020312	215999	Mcu	Mcu	ENSMUSP00000022543	68514	Micu2	Micu2	993
ENSMUSP00000020930	14674	Gna13	Gna13	ENSMUSP00000037255	14816	Grm1	Grm1	803
ENSMUSP00000020930	14674	Gna13	Gna13	ENSMUSP00000070958	11607	Agtr1a	Agtr1a	848
ENSMUSP00000020970	58185	Rsad2	Rsad2	ENSMUSP00000132435	14469	Gbp2	Gbp2	713
ENSMUSP00000021443	108156	Mthfd1	Mthfd1	ENSMUSP00000097442	238505	Mtr	Mtr	974
ENSMUSP00000021900	20354	Sema4d	Sema4d	ENSMUSP00000051731	140570	Plxnb2	Plxnb2	945
ENSMUSP00000021900	20354	Sema4d	Sema4d	ENSMUSP00000042150	20130	Rras	Rras	950
ENSMUSP00000021970	57266	Cxcl14	Cxcl14	ENSMUSP00000072800	20315	Cxcl12	Cxcl12	741
ENSMUSP00000022268	68263	Pdhb	Pdhb	ENSMUSP00000068086	52815	Ldhd	Ldhd	940
ENSMUSP00000022268	68263	Pdhb	Pdhb	ENSMUSP00000026459	11947	Atp5b	Atp5b	851
ENSMUSP00000022268	68263	Pdhb	Pdhb	ENSMUSP00000022286	17993	Ndufs4	Ndufs4	757
ENSMUSP00000022268	68263	Pdhb	Pdhb	ENSMUSP00000023210	66445	Cyc1	Cyc1	761
ENSMUSP00000022268	68263	Pdhb	Pdhb	ENSMUSP00000127526	67834	Idh3a	Idh3a	872
ENSMUSP00000022268	68263	Pdhb	Pdhb	ENSMUSP00000123765	20916	Sucla2	Sucla2	908
ENSMUSP00000022268	68263	Pdhb	Pdhb	ENSMUSP00000023116	11429	Aco2	Aco2	940
ENSMUSP00000022268	68263	Pdhb	Pdhb	ENSMUSP00000034567	235339	Dlat	Dlat	999
ENSMUSP00000022268	68263	Pdhb	Pdhb	ENSMUSP00000071292	12039	Bckdha	Bckdha	999
ENSMUSP00000022268	68263	Pdhb	Pdhb	ENSMUSP00000033662	18597	Pdha1	Pdha1	999
ENSMUSP00000022268	68263	Pdhb	Pdhb	ENSMUSP00000065113	56451	Suclg1	Suclg1	933
ENSMUSP00000022268	68263	Pdhb	Pdhb	ENSMUSP00000113022	11950	Atp5pb	Atp5pb	805
ENSMUSP00000022286	17993	Ndufs4	Ndufs4	ENSMUSP00000075953	66091	Ndufa3	Ndufa3	996
ENSMUSP00000022286	17993	Ndufs4	Ndufs4	ENSMUSP00000038463	66377	Ndufc1	Ndufc1	998
ENSMUSP00000022286	17993	Ndufs4	Ndufs4	ENSMUSP00000023210	66445	Cyc1	Cyc1	993
ENSMUSP00000022286	17993	Ndufs4	Ndufs4	ENSMUSP00000113022	11950	Atp5pb	Atp5pb	900
ENSMUSP00000023116	11429	Aco2	Aco2	ENSMUSP00000127526	67834	Idh3a	Idh3a	998
ENSMUSP00000023116	11429	Aco2	Aco2	ENSMUSP00000123765	20916	Sucla2	Sucla2	886
ENSMUSP00000023116	11429	Aco2	Aco2	ENSMUSP00000034567	235339	Dlat	Dlat	747
ENSMUSP00000023116	11429	Aco2	Aco2	ENSMUSP00000026459	11947	Atp5b	Atp5b	921
ENSMUSP00000023116	11429	Aco2	Aco2	ENSMUSP00000023210	66445	Cyc1	Cyc1	858
ENSMUSP00000023116	11429	Aco2	Aco2	ENSMUSP00000033662	18597	Pdha1	Pdha1	739
ENSMUSP00000023116	11429	Aco2	Aco2	ENSMUSP00000065113	56451	Suclg1	Suclg1	872
ENSMUSP00000023210	66445	Cyc1	Cyc1	ENSMUSP00000075953	66091	Ndufa3	Ndufa3	978
ENSMUSP00000023210	66445	Cyc1	Cyc1	ENSMUSP00000038463	66377	Ndufc1	Ndufc1	986
ENSMUSP00000023210	66445	Cyc1	Cyc1	ENSMUSP00000026459	11947	Atp5b	Atp5b	975
ENSMUSP00000023210	66445	Cyc1	Cyc1	ENSMUSP00000096193	12865	Cox7a1	Cox7a1	888
ENSMUSP00000023210	66445	Cyc1	Cyc1	ENSMUSP00000123765	20916	Sucla2	Sucla2	749
ENSMUSP00000023210	66445	Cyc1	Cyc1	ENSMUSP00000065113	56451	Suclg1	Suclg1	929
ENSMUSP00000023210	66445	Cyc1	Cyc1	ENSMUSP00000113022	11950	Atp5pb	Atp5pb	932
ENSMUSP00000023882	68188	Sympk	Sympk	ENSMUSP00000088935	22218	Sumo1	Sumo1	726
ENSMUSP00000023882	68188	Sympk	Sympk	ENSMUSP00000044677	331401	Thoc2	Thoc2	913
ENSMUSP00000026148	12409	Cbr2	Cbr2	ENSMUSP00000028162	96979	Ptges2	Ptges2	908
ENSMUSP00000026196	14718	Got1	Got1	ENSMUSP00000127526	67834	Idh3a	Idh3a	838
ENSMUSP00000026459	11947	Atp5b	Atp5b	ENSMUSP00000046101	13629	Eef2	Eef2	860
ENSMUSP00000026459	11947	Atp5b	Atp5b	ENSMUSP00000127526	67834	Idh3a	Idh3a	913
ENSMUSP00000026459	11947	Atp5b	Atp5b	ENSMUSP00000065113	56451	Suclg1	Suclg1	913
ENSMUSP00000026459	11947	Atp5b	Atp5b	ENSMUSP00000113022	11950	Atp5pb	Atp5pb	999
ENSMUSP00000026617	18682	Phkg1	Phkg1	ENSMUSP00000071231	110095	Pygl	Pygl	843
ENSMUSP00000027464	69163	Mrpl44	Mrpl44	ENSMUSP00000062476	28028	Mrpl50	Mrpl50	985
ENSMUSP00000027464	69163	Mrpl44	Mrpl44	ENSMUSP00000048348	232536	Mrps35	Mrps35	822
ENSMUSP00000027464	69163	Mrpl44	Mrpl44	ENSMUSP00000076503	28030	Gfm1	Gfm1	965
ENSMUSP00000029147	18041	Nfs1	Nfs1	ENSMUSP00000123765	20916	Sucla2	Sucla2	720
ENSMUSP00000031131	22223	Uchl1	Uchl1	ENSMUSP00000089728	59025	Usp14	Usp14	703
ENSMUSP00000031423	11938	Atp2a2	Atp2a2	ENSMUSP00000080538	140781	Myh7	Myh7	740
ENSMUSP00000032629	20430	Cyfip1	Cyfip1	ENSMUSP00000120240	330319	Wipf3	Wipf3	935
ENSMUSP00000033662	18597	Pdha1	Pdha1	ENSMUSP00000123765	20916	Sucla2	Sucla2	752
ENSMUSP00000033662	18597	Pdha1	Pdha1	ENSMUSP00000034567	235339	Dlat	Dlat	999
ENSMUSP00000033662	18597	Pdha1	Pdha1	ENSMUSP00000068086	52815	Ldhd	Ldhd	917
ENSMUSP00000033662	18597	Pdha1	Pdha1	ENSMUSP00000071292	12039	Bckdha	Bckdha	927
ENSMUSP00000033662	18597	Pdha1	Pdha1	ENSMUSP00000065113	56451	Suclg1	Suclg1	775
ENSMUSP00000034508	53376	Usp2	Usp2	ENSMUSP00000089728	59025	Usp14	Usp14	814
ENSMUSP00000034508	53376	Usp2	Usp2	ENSMUSP00000072155	72607	Usp13	Usp13	740
ENSMUSP00000034567	235339	Dlat	Dlat	ENSMUSP00000127526	67834	Idh3a	Idh3a	765
ENSMUSP00000034567	235339	Dlat	Dlat	ENSMUSP00000123765	20916	Sucla2	Sucla2	953
ENSMUSP00000034567	235339	Dlat	Dlat	ENSMUSP00000071292	12039	Bckdha	Bckdha	977
ENSMUSP00000034567	235339	Dlat	Dlat	ENSMUSP00000065113	56451	Suclg1	Suclg1	972
ENSMUSP00000034740	17999	Nedd4	Nedd4	ENSMUSP00000087810	142687	Asb14	Asb14	904
ENSMUSP00000037255	14816	Grm1	Grm1	ENSMUSP00000057543	14678	Gnai2	Gnai2	836
ENSMUSP00000037255	14816	Grm1	Grm1	ENSMUSP00000070958	11607	Agtr1a	Agtr1a	901
ENSMUSP00000038463	66377	Ndufc1	Ndufc1	ENSMUSP00000075953	66091	Ndufa3	Ndufa3	996
ENSMUSP00000038463	66377	Ndufc1	Ndufc1	ENSMUSP00000113022	11950	Atp5pb	Atp5pb	744
ENSMUSP00000042150	20130	Rras	Rras	ENSMUSP00000071289	18015	Nf1	Nf1	887
ENSMUSP00000042150	20130	Rras	Rras	ENSMUSP00000051731	140570	Plxnb2	Plxnb2	909
ENSMUSP00000046101	13629	Eef2	Eef2	ENSMUSP00000075772	18810	Plec	Plec	814
ENSMUSP00000046101	13629	Eef2	Eef2	ENSMUSP00000106519	22070	Tpt1	Tpt1	894
ENSMUSP00000046101	13629	Eef2	Eef2	ENSMUSP00000069004	20054	Rps15	Rps15	961
ENSMUSP00000046540	269113	Nup54	Nup54	ENSMUSP00000088935	22218	Sumo1	Sumo1	915
ENSMUSP00000048348	232536	Mrps35	Mrps35	ENSMUSP00000062476	28028	Mrpl50	Mrpl50	773
ENSMUSP00000051731	140570	Plxnb2	Plxnb2	ENSMUSP00000110643	20353	Sema4c	Sema4c	804
ENSMUSP00000057543	14678	Gnai2	Gnai2	ENSMUSP00000072800	20315	Cxcl12	Cxcl12	918
ENSMUSP00000057543	14678	Gnai2	Gnai2	ENSMUSP00000110563	224129	Adcy5	Adcy5	933
ENSMUSP00000062476	28028	Mrpl50	Mrpl50	ENSMUSP00000076503	28030	Gfm1	Gfm1	917
ENSMUSP00000065113	56451	Suclg1	Suclg1	ENSMUSP00000127526	67834	Idh3a	Idh3a	943
ENSMUSP00000065113	56451	Suclg1	Suclg1	ENSMUSP00000123765	20916	Sucla2	Sucla2	999
ENSMUSP00000065113	56451	Suclg1	Suclg1	ENSMUSP00000071292	12039	Bckdha	Bckdha	727
ENSMUSP00000065113	56451	Suclg1	Suclg1	ENSMUSP00000113022	11950	Atp5pb	Atp5pb	895
ENSMUSP00000069004	20054	Rps15	Rps15	ENSMUSP00000075772	18810	Plec	Plec	876
ENSMUSP00000069004	20054	Rps15	Rps15	ENSMUSP00000106519	22070	Tpt1	Tpt1	808
ENSMUSP00000069004	20054	Rps15	Rps15	ENSMUSP00000076503	28030	Gfm1	Gfm1	707
ENSMUSP00000072155	72607	Usp13	Usp13	ENSMUSP00000089728	59025	Usp14	Usp14	829
ENSMUSP00000073061	53328	Pgrmc1	Pgrmc1	ENSMUSP00000124480	109672	Cyb5a	Cyb5a	810
ENSMUSP00000083115	66349	Dmac2	Dmac2	ENSMUSP00000113022	11950	Atp5pb	Atp5pb	744
ENSMUSP00000100010	66482	Exoc2	Exoc2	ENSMUSP00000109121	69940	Exoc1	Exoc1	999
ENSMUSP00000123765	20916	Sucla2	Sucla2	ENSMUSP00000127526	67834	Idh3a	Idh3a	965
ENSMUSP00000123765	20916	Sucla2	Sucla2	ENSMUSP00000135483	70397	Tmem70	Tmem70	715
